# Supplementary material for: Upper-Limb Kinematic Variables are correlated with Fugl-Meyer Assessment Sub Scales During a Hand-to-Mouth Functional Task in Post-Stroke Individuals
Source: Research Square preprint supplement (doi:10.21203/rs.3.rs-8270137/v1), 2025-12-16
Supplement: Supplementary file 1 [file Additional file 1.xls]

## Sheet: Static
PathFileType	4	(X/Y/Z)	Static.trc
DataRate	CameraRate	NumFrames	NumMarkers	Units	OrigDataRate	OrigDataStartFrame	OrigNumFrames
100	100	768	17	mm	100	1	768
Frame#	Time	nasion			r zyg pr			l zyg pr			r should			l should			sternum			r elbow			r ulna			r radius			r hand			r finger			l elbow			l ulna			l radius			l hand			l finger
		X1	Y1	Z1	X2	Y2	Z2	X3	Y3	Z3	X4	Y4	Z4	X5	Y5	Z5	X6	Y6	Z6	X7	Y7	Z7	X8	Y8	Z8	X9	Y9	Z9	X10	Y10	Z10	X11	Y11	Z11	X12	Y12	Z12	X13	Y13	Z13	X14	Y14	Z14	X15	Y15	Z15	X16	Y16	Z16
1	0	768.625	1247.49	196.154	809.783	1238.09	121.477	828.869	1238.52	261.902	919.686	1059	24.9007	917.982	1082.34	361.341	840.64	1038.88	198.884	861.309	693.259	-115.416	645.703	792.395	-75.1842	661.138	804.286	1.51288	567.807	808.846	-12.4643	476.357	781.892	10.9535	854.635	708.057	519.666	619.734	796.115	513.677	633.878	798.236	430.213	544.607	823.212	459.52	443.553	782.632	434.33
2	0.01	768.646	1247.46	196.113	809.75	1238.16	121.465	828.86	1238.49	261.884	919.728	1059.04	24.9071	917.978	1082.36	361.341	840.542	1038.99	198.91	861.305	693.356	-115.379	645.66	792.459	-75.1485	661.116	804.355	1.52738	567.801	808.905	-12.4382	476.345	781.946	10.9915	854.711	708.026	519.708	619.799	796.128	513.666	634.011	798.271	430.296	544.689	823.234	459.547	443.528	782.694	434.35
3	0.02	768.705	1247.46	196.028	809.767	1238.18	121.405	828.906	1238.46	261.867	919.775	1059.06	24.891	918.005	1082.36	361.315	840.539	1039.02	198.866	861.315	693.383	-115.397	645.656	792.471	-75.1554	661.116	804.383	1.49911	567.809	808.942	-12.4559	476.359	781.967	10.9735	854.754	707.989	519.725	619.817	796.136	513.63	634.101	798.252	430.31	544.734	823.235	459.519	443.549	782.715	434.332
4	0.03	768.793	1247.36	195.967	809.775	1238.15	121.342	828.924	1238.43	261.844	919.773	1059.02	24.8615	917.991	1082.32	361.288	840.609	1038.97	198.831	861.36	693.305	-115.422	645.672	792.431	-75.1684	661.099	804.372	1.45874	567.798	808.92	-12.4802	476.376	781.942	10.93	854.766	707.974	519.733	619.82	796.136	513.624	634.113	798.184	430.299	544.719	823.192	459.475	443.552	782.685	434.311
5	0.04	768.726	1247.28	195.958	809.786	1238.08	121.31	828.888	1238.41	261.831	919.753	1058.96	24.8405	917.986	1082.28	361.254	840.631	1038.88	198.77	861.365	693.177	-115.436	645.688	792.361	-75.2031	661.092	804.309	1.42083	567.785	808.871	-12.5083	476.391	781.886	10.8937	854.816	707.961	519.743	619.836	796.12	513.625	634.114	798.096	430.27	544.689	823.146	459.444	443.535	782.611	434.277
6	0.05	768.737	1247.18	195.934	809.839	1237.98	121.271	828.889	1238.41	261.838	919.744	1058.92	24.8167	917.981	1082.23	361.223	840.75	1038.76	198.712	861.369	693.058	-115.485	645.717	792.279	-75.24	661.133	804.247	1.35904	567.822	808.79	-12.552	476.432	781.829	10.8715	854.866	707.965	519.75	619.871	796.14	513.633	634.064	798.014	430.215	544.694	823.089	459.418	443.555	782.536	434.25
7	0.06	768.758	1247.11	195.873	809.857	1237.92	121.193	828.841	1238.38	261.808	919.734	1058.89	24.7923	917.977	1082.2	361.199	840.806	1038.68	198.672	861.354	692.982	-115.545	645.734	792.236	-75.2953	661.185	804.2	1.31306	567.868	808.75	-12.5913	476.473	781.778	10.8232	854.814	707.961	519.726	619.864	796.145	513.603	634.045	797.981	430.178	544.677	823.038	459.377	443.569	782.502	434.214
8	0.07	768.79	1247.03	195.84	809.809	1237.9	121.183	828.781	1238.33	261.797	919.712	1058.88	24.7978	917.941	1082.2	361.207	840.767	1038.66	198.678	861.342	693.001	-115.539	645.696	792.254	-75.2865	661.187	804.198	1.32985	567.88	808.754	-12.5967	476.427	781.779	10.8291	854.78	707.951	519.74	619.818	796.135	513.598	633.981	797.993	430.173	544.635	823.024	459.381	443.534	782.487	434.219
9	0.08	768.657	1247.05	195.875	809.713	1237.92	121.227	828.742	1238.32	261.801	919.703	1058.91	24.8227	917.893	1082.23	361.243	840.687	1038.71	198.741	861.318	693.07	-115.494	645.646	792.311	-75.2485	661.128	804.245	1.36917	567.826	808.776	-12.5623	476.384	781.814	10.885	854.748	707.931	519.752	619.77	796.118	513.613	633.993	798.064	430.219	544.63	823.06	459.435	443.519	782.544	434.268
10	0.09	768.638	1247.09	195.935	809.639	1237.93	121.29	828.712	1238.32	261.818	919.707	1058.94	24.8537	917.883	1082.26	361.267	840.647	1038.78	198.808	861.347	693.142	-115.447	645.654	792.365	-75.1931	661.127	804.283	1.41693	567.818	808.792	-12.504	476.361	781.851	10.9424	854.736	707.929	519.765	619.749	796.118	513.632	634.022	798.151	430.265	544.653	823.107	459.488	443.531	782.602	434.321
11	0.1	768.53	1247.14	195.979	809.557	1237.96	121.329	828.641	1238.33	261.816	919.704	1058.97	24.8702	917.894	1082.29	361.288	840.566	1038.86	198.842	861.33	693.2	-115.405	645.658	792.421	-75.1631	661.133	804.329	1.44601	567.809	808.816	-12.458	476.329	781.881	10.9803	854.701	707.919	519.752	619.755	796.127	513.634	634.018	798.221	430.294	544.666	823.163	459.517	443.529	782.651	434.36
12	0.11	768.39	1247.13	195.97	809.48	1237.94	121.327	828.587	1238.32	261.818	919.691	1058.96	24.882	917.848	1082.3	361.308	840.467	1038.9	198.859	861.318	693.21	-115.396	645.628	792.432	-75.1556	661.123	804.368	1.45053	567.776	808.814	-12.4802	476.321	781.897	10.9858	854.702	707.915	519.748	619.768	796.14	513.632	634.018	798.219	430.306	544.679	823.175	459.527	443.525	782.669	434.378
13	0.12	768.328	1247.12	195.913	809.442	1237.89	121.259	828.576	1238.32	261.803	919.687	1058.94	24.8658	917.84	1082.29	361.294	840.461	1038.87	198.805	861.339	693.18	-115.448	645.648	792.408	-75.1905	661.122	804.354	1.41475	567.784	808.767	-12.5332	476.321	781.888	10.9572	854.724	707.937	519.746	619.753	796.141	513.635	634.032	798.194	430.289	544.661	823.169	459.503	443.551	782.652	434.339
14	0.13	768.496	1247.03	195.833	809.486	1237.82	121.186	828.592	1238.35	261.787	919.685	1058.93	24.8442	917.864	1082.26	361.267	840.577	1038.8	198.746	861.338	693.122	-115.49	645.713	792.369	-75.2313	661.156	804.322	1.37814	567.836	808.74	-12.601	476.366	781.856	10.9051	854.73	707.962	519.752	619.755	796.149	513.63	634.031	798.167	430.252	544.669	823.149	459.476	443.582	782.619	434.301
15	0.14	768.532	1246.96	195.8	809.463	1237.76	121.147	828.565	1238.36	261.754	919.664	1058.91	24.8223	917.863	1082.25	361.259	840.642	1038.76	198.708	861.319	693.063	-115.489	645.703	792.333	-75.2457	661.143	804.304	1.35248	567.806	808.751	-12.6355	476.394	781.845	10.8739	854.699	707.959	519.729	619.751	796.178	513.614	633.989	798.126	430.201	544.619	823.138	459.445	443.554	782.592	434.268
16	0.15	768.411	1246.95	195.794	809.438	1237.72	121.132	828.54	1238.36	261.742	919.631	1058.9	24.8336	917.828	1082.23	361.266	840.615	1038.72	198.732	861.322	693.036	-115.493	645.674	792.344	-75.2394	661.124	804.305	1.36525	567.805	808.723	-12.6469	476.399	781.82	10.8598	854.686	707.938	519.733	619.745	796.178	513.616	633.954	798.108	430.193	544.61	823.135	459.442	443.549	782.576	434.259
17	0.16	768.353	1246.95	195.787	809.433	1237.7	121.105	828.518	1238.37	261.735	919.615	1058.9	24.8391	917.835	1082.21	361.274	840.727	1038.69	198.731	861.324	693.048	-115.51	645.682	792.342	-75.2435	661.152	804.303	1.35398	567.824	808.716	-12.6474	476.416	781.826	10.8567	854.689	707.905	519.744	619.751	796.171	513.628	633.976	798.091	430.2	544.649	823.14	459.44	443.572	782.563	434.247
18	0.17	768.413	1246.92	195.777	809.4	1237.68	121.105	828.506	1238.38	261.726	919.603	1058.91	24.8424	917.852	1082.23	361.303	840.722	1038.7	198.743	861.312	693.078	-115.517	645.681	792.364	-75.2204	661.167	804.315	1.35012	567.828	808.693	-12.5993	476.427	781.823	10.8931	854.709	707.894	519.75	619.777	796.162	513.629	634.014	798.097	430.214	544.679	823.132	459.459	443.575	782.562	434.271
19	0.18	768.279	1246.96	195.776	809.344	1237.65	121.104	828.498	1238.38	261.703	919.591	1058.93	24.8454	917.814	1082.23	361.316	840.572	1038.76	198.781	861.28	693.1	-115.495	645.645	792.386	-75.1988	661.136	804.337	1.38143	567.778	808.696	-12.5632	476.385	781.815	10.9026	854.713	707.87	519.718	619.766	796.153	513.613	633.994	798.118	430.232	544.679	823.134	459.466	443.54	782.591	434.283
20	0.19	768.229	1246.98	195.779	809.294	1237.65	121.117	828.495	1238.36	261.682	919.58	1058.94	24.8791	917.798	1082.2	361.315	840.532	1038.79	198.816	861.222	693.139	-115.462	645.633	792.411	-75.1827	661.109	804.345	1.40203	567.712	808.699	-12.551	476.321	781.832	10.9194	854.755	707.841	519.722	619.779	796.136	513.619	634.022	798.137	430.259	544.713	823.137	459.477	443.531	782.608	434.29
21	0.2	768.267	1246.97	195.792	809.275	1237.65	121.128	828.499	1238.37	261.686	919.563	1058.93	24.8982	917.781	1082.19	361.327	840.593	1038.79	198.838	861.199	693.175	-115.459	645.614	792.424	-75.1711	661.13	804.359	1.41079	567.706	808.707	-12.5586	476.345	781.846	10.9408	854.789	707.818	519.733	619.805	796.126	513.631	634.077	798.129	430.286	544.74	823.121	459.491	443.542	782.623	434.301
22	0.21	768.257	1246.94	195.819	809.21	1237.64	121.165	828.471	1238.36	261.691	919.553	1058.93	24.9198	917.759	1082.19	361.359	840.605	1038.77	198.869	861.192	693.201	-115.457	645.61	792.428	-75.1639	661.111	804.357	1.42541	567.695	808.718	-12.53	476.31	781.857	10.9802	854.784	707.798	519.734	619.794	796.118	513.642	634.076	798.123	430.294	544.719	823.103	459.496	443.538	782.623	434.311
23	0.22	768.354	1246.89	195.809	809.211	1237.62	121.164	828.44	1238.33	261.683	919.551	1058.93	24.9317	917.758	1082.17	361.357	840.645	1038.75	198.866	861.214	693.2	-115.46	645.605	792.436	-75.1611	661.084	804.354	1.431	567.695	808.673	-12.5073	476.268	781.85	10.9995	854.746	707.781	519.73	619.767	796.088	513.643	634.048	798.108	430.286	544.714	823.101	459.494	443.547	782.608	434.307
24	0.23	768.497	1246.8	195.775	809.233	1237.6	121.132	828.43	1238.32	261.678	919.564	1058.91	24.9113	917.732	1082.16	361.351	840.711	1038.69	198.86	861.221	693.153	-115.482	645.614	792.437	-75.1827	661.116	804.336	1.41659	567.745	808.641	-12.5297	476.31	781.811	10.9603	854.735	707.793	519.761	619.764	796.076	513.636	634.063	798.091	430.265	544.704	823.093	459.482	443.577	782.587	434.296
25	0.24	768.496	1246.8	195.763	809.25	1237.61	121.123	828.414	1238.33	261.693	919.543	1058.89	24.8828	917.697	1082.16	361.319	840.724	1038.67	198.828	861.211	693.133	-115.49	645.629	792.419	-75.2039	661.116	804.33	1.39738	567.755	808.639	-12.583	476.341	781.802	10.9204	854.702	707.785	519.768	619.754	796.089	513.631	634.055	798.091	430.249	544.662	823.08	459.455	443.558	782.584	434.277
26	0.25	768.386	1246.85	195.786	809.202	1237.63	121.156	828.448	1238.36	261.725	919.503	1058.89	24.8745	917.68	1082.16	361.297	840.674	1038.71	198.799	861.25	693.117	-115.501	645.613	792.413	-75.1949	661.112	804.339	1.38234	567.735	808.649	-12.6272	476.337	781.827	10.9284	854.705	707.796	519.765	619.744	796.118	513.621	634.032	798.106	430.248	544.665	823.095	459.456	443.547	782.589	434.269
27	0.26	768.428	1246.84	195.764	809.213	1237.64	121.153	828.446	1238.35	261.727	919.496	1058.9	24.8549	917.694	1082.17	361.284	840.654	1038.77	198.766	861.272	693.103	-115.519	645.622	792.406	-75.216	661.1	804.346	1.35199	567.713	808.684	-12.6349	476.365	781.822	10.918	854.71	707.831	519.762	619.747	796.136	513.612	634.044	798.107	430.243	544.654	823.111	459.448	443.545	782.596	434.272
28	0.27	768.415	1246.89	195.821	809.21	1237.66	121.179	828.467	1238.35	261.755	919.516	1058.91	24.8528	917.713	1082.2	361.263	840.648	1038.8	198.751	861.259	693.12	-115.512	645.63	792.411	-75.2296	661.112	804.365	1.33228	567.737	808.699	-12.6275	476.376	781.841	10.9232	854.713	707.869	519.778	619.764	796.155	513.623	634.071	798.125	430.26	544.658	823.153	459.443	443.549	782.61	434.283
29	0.28	768.337	1246.93	195.898	809.149	1237.7	121.23	828.472	1238.35	261.782	919.508	1058.92	24.8509	917.697	1082.22	361.266	840.556	1038.84	198.772	861.25	693.114	-115.492	645.606	792.425	-75.2202	661.081	804.398	1.36104	567.731	808.712	-12.64	476.353	781.868	10.9303	854.729	707.895	519.79	619.786	796.176	513.646	634.045	798.152	430.272	544.621	823.173	459.447	443.536	782.63	434.29
30	0.29	768.34	1246.93	195.92	809.14	1237.72	121.274	828.496	1238.33	261.814	919.48	1058.92	24.845	917.664	1082.23	361.274	840.469	1038.86	198.779	861.243	693.092	-115.487	645.604	792.419	-75.2274	661.071	804.418	1.37003	567.698	808.716	-12.6355	476.367	781.879	10.9286	854.716	707.907	519.793	619.784	796.172	513.646	634.009	798.156	430.281	544.63	823.166	459.441	443.527	782.645	434.303
31	0.3	768.39	1246.89	195.984	809.151	1237.7	121.308	828.482	1238.31	261.836	919.483	1058.89	24.8265	917.676	1082.23	361.249	840.523	1038.82	198.756	861.257	693.066	-115.486	645.631	792.409	-75.2189	661.102	804.408	1.3665	567.753	808.685	-12.6318	476.375	781.878	10.9198	854.713	707.92	519.793	619.762	796.162	513.62	633.999	798.157	430.254	544.633	823.145	459.429	443.546	782.625	434.298
32	0.31	768.426	1246.85	196.084	809.152	1237.68	121.369	828.502	1238.29	261.872	919.501	1058.87	24.8332	917.684	1082.22	361.258	840.611	1038.74	198.785	861.273	693.024	-115.49	645.65	792.395	-75.2128	661.12	804.386	1.37796	567.782	808.654	-12.6142	476.4	781.85	10.9157	854.721	707.915	519.791	619.784	796.154	513.641	633.971	798.153	430.243	544.633	823.131	459.452	443.567	782.612	434.303
33	0.32	768.363	1246.83	196.135	809.088	1237.67	121.408	828.546	1238.28	261.888	919.491	1058.85	24.8527	917.657	1082.2	361.267	840.578	1038.73	198.804	861.278	692.974	-115.486	645.637	792.38	-75.2256	661.097	804.364	1.38056	567.77	808.624	-12.6104	476.379	781.812	10.9161	854.692	707.888	519.789	619.755	796.147	513.654	633.979	798.149	430.251	544.628	823.117	459.455	443.553	782.59	434.309
34	0.33	768.459	1246.8	196.128	809.077	1237.65	121.414	828.566	1238.27	261.897	919.464	1058.82	24.842	917.645	1082.2	361.269	840.555	1038.73	198.774	861.281	692.94	-115.515	645.661	792.365	-75.239	661.087	804.363	1.36862	567.758	808.596	-12.6361	476.35	781.805	10.9269	854.682	707.869	519.776	619.737	796.137	513.641	633.977	798.131	430.244	544.638	823.086	459.449	443.549	782.571	434.291
35	0.34	768.389	1246.86	196.177	809.078	1237.67	121.436	828.597	1238.27	261.904	919.469	1058.79	24.8425	917.718	1082.2	361.278	840.562	1038.74	198.76	861.295	692.946	-115.521	645.691	792.354	-75.2503	661.104	804.362	1.35271	567.772	808.618	-12.6459	476.38	781.818	10.9112	854.718	707.873	519.754	619.754	796.132	513.622	634.008	798.126	430.236	544.639	823.076	459.446	443.547	782.573	434.279
36	0.35	768.369	1246.9	196.218	809.004	1237.69	121.481	828.611	1238.27	261.931	919.472	1058.79	24.874	917.746	1082.22	361.301	840.47	1038.77	198.797	861.248	692.979	-115.486	645.649	792.379	-75.2296	661.114	804.382	1.36231	567.724	808.643	-12.6228	476.338	781.843	10.9358	854.742	707.865	519.76	619.763	796.125	513.615	634.029	798.123	430.255	544.662	823.091	459.47	443.55	782.595	434.287
37	0.36	768.288	1246.93	196.232	808.921	1237.7	121.527	828.606	1238.29	261.935	919.465	1058.81	24.8804	917.726	1082.24	361.332	840.401	1038.77	198.82	861.216	693.008	-115.451	645.604	792.415	-75.2029	661.101	804.393	1.37315	567.693	808.669	-12.6159	476.302	781.857	10.9628	854.76	707.862	519.764	619.782	796.126	513.634	634.059	798.111	430.285	544.696	823.115	459.49	443.51	782.629	434.305
38	0.37	768.414	1246.89	196.202	808.941	1237.7	121.527	828.643	1238.29	261.926	919.472	1058.81	24.873	917.748	1082.23	361.346	840.423	1038.75	198.805	861.261	693.027	-115.48	645.599	792.409	-75.2264	661.094	804.382	1.35912	567.695	808.674	-12.6341	476.303	781.863	10.9598	854.76	707.846	519.752	619.793	796.114	513.633	634.102	798.127	430.284	544.712	823.125	459.478	443.495	782.631	434.308
39	0.38	768.491	1246.86	196.216	809.005	1237.68	121.512	828.662	1238.32	261.924	919.497	1058.81	24.8701	917.774	1082.22	361.332	840.463	1038.73	198.819	861.311	693.026	-115.489	645.634	792.387	-75.2395	661.1	804.372	1.33933	567.746	808.645	-12.6403	476.35	781.851	10.9208	854.785	707.845	519.758	619.822	796.118	513.623	634.088	798.112	430.277	544.739	823.114	459.481	443.539	782.61	434.298
40	0.39	768.42	1246.89	196.248	809.028	1237.66	121.496	828.658	1238.35	261.919	919.496	1058.81	24.8857	917.771	1082.2	361.353	840.541	1038.72	198.845	861.325	693.019	-115.489	645.657	792.372	-75.2302	661.097	804.378	1.34807	567.756	808.636	-12.6028	476.35	781.852	10.9183	854.791	707.858	519.764	619.811	796.12	513.623	634.082	798.103	430.284	544.69	823.105	459.47	443.572	782.598	434.291
41	0.4	768.355	1246.9	196.208	809.065	1237.64	121.46	828.644	1238.36	261.913	919.493	1058.83	24.8755	917.754	1082.19	361.354	840.567	1038.71	198.824	861.307	693.027	-115.506	645.638	792.373	-75.2359	661.1	804.361	1.3503	567.728	808.638	-12.6269	476.338	781.837	10.8942	854.778	707.869	519.772	619.786	796.123	513.625	634.048	798.094	430.263	544.675	823.118	459.458	443.569	782.596	434.275
42	0.41	768.396	1246.89	196.145	809.052	1237.64	121.424	828.595	1238.37	261.9	919.499	1058.86	24.8716	917.765	1082.19	361.329	840.575	1038.71	198.815	861.325	693.037	-115.517	645.627	792.377	-75.2533	661.109	804.36	1.33228	567.7	808.64	-12.6788	476.351	781.852	10.8856	854.736	707.863	519.765	619.769	796.146	513.613	634.01	798.107	430.233	544.675	823.134	459.442	443.559	782.587	434.256
43	0.42	768.369	1246.91	196.119	809.067	1237.65	121.426	828.573	1238.36	261.896	919.49	1058.87	24.8985	917.766	1082.2	361.352	840.578	1038.72	198.832	861.301	693.075	-115.517	645.619	792.411	-75.2382	661.126	804.361	1.33508	567.718	808.647	-12.6469	476.345	781.862	10.8921	854.726	707.869	519.766	619.789	796.171	513.606	633.98	798.127	430.226	544.661	823.163	459.433	443.549	782.59	434.266
44	0.43	768.352	1246.92	196.094	809.084	1237.68	121.463	828.547	1238.36	261.906	919.522	1058.89	24.9259	917.782	1082.21	361.382	840.601	1038.72	198.83	861.274	693.097	-115.481	645.601	792.438	-75.1885	661.109	804.374	1.36066	567.735	808.659	-12.6146	476.318	781.861	10.9136	854.68	707.866	519.765	619.781	796.183	513.624	633.982	798.159	430.234	544.625	823.184	459.44	443.56	782.615	434.277
45	0.44	768.318	1246.94	196.124	809.132	1237.67	121.459	828.523	1238.36	261.925	919.573	1058.9	24.9399	917.795	1082.19	361.38	840.625	1038.72	198.845	861.271	693.146	-115.481	645.606	792.455	-75.1646	661.095	804.385	1.37784	567.748	808.664	-12.6188	476.33	781.872	10.9237	854.654	707.834	519.767	619.746	796.166	513.633	633.998	798.186	430.251	544.648	823.18	459.466	443.578	782.619	434.287
46	0.45	768.425	1246.91	196.123	809.195	1237.67	121.446	828.545	1238.32	261.925	919.603	1058.9	24.9462	917.769	1082.17	361.382	840.607	1038.73	198.872	861.258	693.164	-115.485	645.595	792.458	-75.165	661.09	804.389	1.40198	567.735	808.67	-12.6123	476.334	781.863	10.9317	854.667	707.8	519.764	619.742	796.148	513.62	634.029	798.183	430.264	544.651	823.162	459.489	443.586	782.631	434.301
47	0.46	768.432	1246.9	196.157	809.233	1237.68	121.473	828.552	1238.3	261.927	919.632	1058.88	24.9445	917.777	1082.13	361.409	840.65	1038.72	198.925	861.243	693.146	-115.458	645.601	792.449	-75.1584	661.081	804.379	1.42053	567.74	808.659	-12.5966	476.337	781.863	10.96	854.68	707.782	519.76	619.737	796.112	513.628	634.038	798.157	430.271	544.659	823.147	459.502	443.57	782.621	434.309
48	0.47	768.474	1246.9	196.18	809.271	1237.67	121.51	828.563	1238.3	261.948	919.646	1058.86	24.9587	917.841	1082.11	361.43	840.724	1038.68	198.921	861.246	693.13	-115.451	645.622	792.432	-75.1613	661.073	804.366	1.4164	567.726	808.637	-12.5991	476.317	781.861	10.982	854.683	707.767	519.751	619.735	796.105	513.643	634.041	798.138	430.274	544.697	823.132	459.502	443.59	782.617	434.312
49	0.48	768.552	1246.89	196.163	809.286	1237.67	121.517	828.578	1238.28	261.99	919.671	1058.84	24.9625	917.86	1082.1	361.429	840.782	1038.64	198.903	861.267	693.096	-115.472	645.661	792.399	-75.1936	661.083	804.346	1.40867	567.758	808.609	-12.5958	476.344	781.835	10.9558	854.708	707.734	519.75	619.719	796.104	513.654	634.04	798.11	430.266	544.7	823.107	459.505	443.583	782.592	434.305
50	0.49	768.517	1246.87	196.168	809.321	1237.66	121.491	828.634	1238.27	261.984	919.675	1058.83	24.9379	917.867	1082.08	361.401	840.752	1038.66	198.887	861.283	693.046	-115.486	645.633	792.393	-75.2062	661.085	804.354	1.38594	567.752	808.631	-12.6314	476.361	781.819	10.9162	854.731	707.728	519.746	619.737	796.102	513.639	634.023	798.08	430.25	544.696	823.106	459.484	443.546	782.576	434.281
51	0.5	768.466	1246.89	196.188	809.349	1237.66	121.505	828.664	1238.27	261.973	919.707	1058.83	24.9246	917.898	1082.05	361.388	840.833	1038.61	198.865	861.286	693.015	-115.484	645.637	792.384	-75.2255	661.119	804.344	1.35492	567.747	808.626	-12.6674	476.358	781.829	10.8687	854.776	707.748	519.739	619.796	796.13	513.632	633.977	798.046	430.227	544.676	823.114	459.432	443.542	782.571	434.268
52	0.51	768.527	1246.9	196.189	809.399	1237.67	121.525	828.689	1238.26	261.999	919.719	1058.82	24.9033	917.918	1082.04	361.368	840.853	1038.6	198.821	861.315	693.031	-115.517	645.684	792.358	-75.2677	661.151	804.351	1.31016	567.779	808.622	-12.6967	476.394	781.827	10.8462	854.776	707.74	519.724	619.793	796.144	513.618	633.97	798.045	430.204	544.697	823.106	459.416	443.543	782.579	434.249
53	0.52	768.646	1246.88	196.247	809.412	1237.69	121.566	828.734	1238.27	262.028	919.731	1058.83	24.9166	917.926	1082.05	361.365	840.849	1038.64	198.836	861.354	693.051	-115.544	645.685	792.377	-75.258	661.142	804.377	1.30984	567.779	808.639	-12.6959	476.42	781.83	10.8529	854.757	707.718	519.702	619.804	796.156	513.626	634.01	798.069	430.217	544.729	823.112	459.452	443.567	782.591	434.249
54	0.53	768.724	1246.85	196.303	809.383	1237.72	121.632	828.765	1238.27	262.043	919.76	1058.85	24.9211	917.931	1082.08	361.367	840.839	1038.69	198.88	861.342	693.084	-115.525	645.663	792.398	-75.2403	661.121	804.41	1.32481	567.779	808.646	-12.6874	476.389	781.856	10.8701	854.755	707.714	519.699	619.823	796.168	513.62	634.03	798.112	430.231	544.721	823.153	459.454	443.552	782.618	434.255
55	0.54	768.742	1246.86	196.338	809.367	1237.74	121.694	828.772	1238.27	262.054	919.783	1058.86	24.9302	917.953	1082.1	361.372	840.795	1038.73	198.889	861.322	693.102	-115.485	645.665	792.428	-75.2195	661.129	804.417	1.34734	567.814	808.655	-12.6806	476.376	781.883	10.8886	854.748	707.713	519.698	619.81	796.16	513.604	634.06	798.165	430.253	544.748	823.17	459.459	443.558	782.666	434.276
56	0.55	768.731	1246.89	196.394	809.316	1237.76	121.748	828.8	1238.26	262.099	919.767	1058.87	24.9381	917.961	1082.09	361.391	840.771	1038.76	198.9	861.316	693.136	-115.481	645.652	792.459	-75.1961	661.123	804.412	1.36863	567.818	808.664	-12.6733	476.348	781.917	10.909	854.73	707.707	519.705	619.766	796.138	513.605	634.099	798.185	430.28	544.733	823.175	459.473	443.586	782.69	434.302
57	0.56	768.812	1246.87	196.479	809.258	1237.76	121.846	828.88	1238.25	262.139	919.761	1058.86	24.9628	917.982	1082.1	361.42	840.816	1038.72	198.936	861.287	693.151	-115.466	645.631	792.474	-75.1512	661.075	804.423	1.40909	567.737	808.657	-12.5975	476.347	781.899	10.9457	854.719	707.698	519.721	619.751	796.135	513.642	634.067	798.179	430.296	544.724	823.174	459.513	443.592	782.68	434.338
58	0.57	768.811	1246.87	196.556	809.245	1237.73	121.869	828.894	1238.26	262.146	919.77	1058.85	24.9704	918.015	1082.09	361.426	840.823	1038.64	198.961	861.267	693.116	-115.455	645.632	792.443	-75.144	661.088	804.394	1.42876	567.716	808.628	-12.5783	476.329	781.872	10.9619	854.681	707.707	519.73	619.756	796.136	513.642	634.053	798.146	430.279	544.689	823.154	459.509	443.57	782.643	434.334
59	0.58	768.884	1246.81	196.564	809.308	1237.67	121.811	828.871	1238.25	262.129	919.761	1058.81	24.9326	918.039	1082.06	361.395	840.87	1038.52	198.945	861.283	693.031	-115.49	645.663	792.374	-75.1945	661.137	804.352	1.40489	567.771	808.587	-12.6253	476.386	781.81	10.9314	854.679	707.727	519.74	619.769	796.127	513.629	634.054	798.093	430.242	544.673	823.105	459.477	443.592	782.58	434.314
60	0.59	768.945	1246.76	196.521	809.326	1237.63	121.788	828.847	1238.25	262.118	919.73	1058.78	24.8957	918.031	1082.04	361.353	840.878	1038.4	198.894	861.31	692.944	-115.513	645.681	792.336	-75.2428	661.149	804.309	1.36152	567.784	808.536	-12.6636	476.383	781.776	10.8949	854.685	707.753	519.741	619.75	796.133	513.623	634.036	798.055	430.206	544.693	823.077	459.447	443.614	782.538	434.269
61	0.6	768.916	1246.77	196.506	809.303	1237.63	121.787	828.862	1238.25	262.124	919.708	1058.77	24.9027	917.994	1082.01	361.334	840.863	1038.36	198.882	861.293	692.922	-115.533	645.693	792.315	-75.243	661.096	804.299	1.35259	567.788	808.538	-12.6809	476.362	781.767	10.8875	854.685	707.75	519.747	619.755	796.138	513.641	634.008	798.028	430.194	544.68	823.059	459.445	443.62	782.524	434.262
62	0.61	768.92	1246.79	196.485	809.246	1237.66	121.79	828.879	1238.26	262.102	919.706	1058.78	24.8965	917.979	1082.03	361.335	840.779	1038.42	198.882	861.283	692.933	-115.52	645.689	792.335	-75.238	661.092	804.323	1.34609	567.758	808.59	-12.705	476.356	781.798	10.8785	854.737	707.773	519.742	619.768	796.151	513.627	633.99	798.047	430.193	544.671	823.074	459.445	443.593	782.556	434.255
63	0.62	768.899	1246.83	196.443	809.257	1237.7	121.763	828.863	1238.27	262.083	919.697	1058.81	24.8925	917.983	1082.08	361.329	840.7	1038.5	198.887	861.324	692.999	-115.497	645.669	792.38	-75.2377	661.104	804.359	1.33468	567.73	808.633	-12.6777	476.364	781.826	10.8553	854.732	707.763	519.717	619.773	796.163	513.607	634.013	798.101	430.218	544.674	823.126	459.435	443.557	782.614	434.248
64	0.63	768.818	1246.89	196.433	809.194	1237.75	121.769	828.852	1238.28	262.071	919.679	1058.84	24.8987	917.969	1082.12	361.337	840.592	1038.59	198.883	861.315	693.062	-115.479	645.618	792.437	-75.2177	661.092	804.417	1.34146	567.688	808.675	-12.656	476.349	781.885	10.8662	854.722	707.747	519.695	619.775	796.175	513.623	634.05	798.136	430.259	544.718	823.181	459.463	443.522	782.673	434.274
65	0.64	768.797	1246.93	196.473	809.155	1237.77	121.791	828.803	1238.28	262.089	919.667	1058.87	24.9337	917.978	1082.15	361.374	840.569	1038.62	198.917	861.296	693.113	-115.469	645.595	792.475	-75.1873	661.088	804.454	1.36801	567.683	808.709	-12.6265	476.352	781.922	10.9197	854.749	707.752	519.709	619.784	796.181	513.648	634.048	798.169	430.288	544.748	823.208	459.513	443.532	782.694	434.313
66	0.65	768.773	1246.94	196.458	809.183	1237.76	121.769	828.805	1238.26	262.094	919.674	1058.87	24.9335	917.982	1082.15	361.381	840.655	1038.58	198.916	861.31	693.104	-115.464	645.626	792.468	-75.1937	661.078	804.459	1.37068	567.723	808.707	-12.6347	476.369	781.937	10.9137	854.736	707.731	519.704	619.792	796.176	513.642	634.084	798.185	430.279	544.735	823.198	459.514	443.569	782.684	434.332
67	0.66	768.73	1246.89	196.449	809.221	1237.72	121.726	828.813	1238.23	262.08	919.654	1058.83	24.9086	917.96	1082.12	361.366	840.708	1038.49	198.902	861.312	693.067	-115.48	645.635	792.438	-75.2036	661.101	804.423	1.34759	567.765	808.649	-12.6469	476.369	781.887	10.8972	854.724	707.721	519.709	619.796	796.157	513.637	634.063	798.16	430.264	544.705	823.162	459.494	443.587	782.65	434.312
68	0.67	768.74	1246.81	196.416	809.228	1237.67	121.696	828.808	1238.21	262.059	919.63	1058.79	24.8986	917.964	1082.08	361.334	840.762	1038.4	198.892	861.305	692.989	-115.517	645.637	792.392	-75.226	661.15	804.375	1.31469	567.798	808.597	-12.6733	476.365	781.845	10.887	854.709	707.7	519.728	619.777	796.134	513.64	634.049	798.116	430.238	544.695	823.123	459.471	443.596	782.594	434.282
69	0.68	768.802	1246.74	196.397	809.223	1237.63	121.682	828.807	1238.21	262.061	919.649	1058.76	24.9033	917.947	1082.03	361.339	840.831	1038.33	198.877	861.311	692.925	-115.538	645.687	792.343	-75.2457	661.191	804.331	1.32583	567.832	808.561	-12.6735	476.374	781.814	10.8873	854.717	707.682	519.743	619.762	796.104	513.643	634.066	798.063	430.223	544.724	823.093	459.487	443.62	782.545	434.279
70	0.69	768.78	1246.71	196.404	809.215	1237.6	121.683	828.812	1238.2	262.048	919.659	1058.73	24.9022	917.899	1082	361.344	840.826	1038.3	198.872	861.314	692.893	-115.516	645.697	792.333	-75.245	661.193	804.32	1.31986	567.833	808.565	-12.6764	476.36	781.804	10.9058	854.734	707.683	519.745	619.759	796.097	513.635	634.055	798.03	430.219	544.731	823.083	459.477	443.615	782.54	434.282
71	0.7	768.701	1246.73	196.392	809.185	1237.58	121.662	828.774	1238.2	262.019	919.641	1058.73	24.9007	917.875	1082	361.326	840.739	1038.33	198.876	861.284	692.884	-115.506	645.664	792.345	-75.2395	661.163	804.332	1.30367	567.775	808.594	-12.6776	476.351	781.803	10.9339	854.717	707.683	519.728	619.755	796.103	513.629	634.045	798.027	430.215	544.692	823.073	459.452	443.593	782.554	434.27
72	0.71	768.683	1246.76	196.321	809.12	1237.57	121.643	828.734	1238.2	262.012	919.614	1058.73	24.9028	917.847	1082.03	361.325	840.656	1038.36	198.863	861.277	692.917	-115.504	645.653	792.362	-75.2523	661.126	804.363	1.31228	567.758	808.6	-12.6807	476.347	781.819	10.9198	854.682	707.677	519.73	619.777	796.124	513.636	634.053	798.052	430.233	544.653	823.092	459.436	443.565	782.571	434.271
73	0.72	768.731	1246.76	196.321	809.072	1237.6	121.637	828.694	1238.22	262.025	919.596	1058.75	24.9216	917.825	1082.06	361.347	840.625	1038.4	198.893	861.268	692.95	-115.484	645.624	792.397	-75.2231	661.126	804.392	1.3323	567.774	808.631	-12.6761	476.353	781.848	10.9352	854.679	707.699	519.738	619.801	796.161	513.653	634.072	798.1	430.261	544.651	823.139	459.454	443.548	782.601	434.291
74	0.73	768.716	1246.79	196.323	809.025	1237.64	121.656	828.68	1238.24	262.003	919.587	1058.77	24.9269	917.802	1082.09	361.366	840.592	1038.43	198.944	861.282	692.948	-115.447	645.604	792.436	-75.2021	661.102	804.412	1.36038	567.763	808.674	-12.6462	476.346	781.887	10.9332	854.693	707.729	519.741	619.783	796.17	513.65	634.054	798.152	430.269	544.665	823.189	459.462	443.529	782.643	434.312
75	0.74	768.533	1246.87	196.339	808.975	1237.66	121.685	828.653	1238.26	261.975	919.57	1058.79	24.9413	917.783	1082.11	361.39	840.453	1038.5	198.955	861.289	692.976	-115.416	645.588	792.448	-75.1869	661.101	804.431	1.37923	567.747	808.704	-12.606	476.348	781.888	10.9488	854.673	707.741	519.734	619.763	796.179	513.645	634.012	798.193	430.267	544.664	823.218	459.489	443.544	782.679	434.338
76	0.75	768.503	1246.85	196.301	808.939	1237.64	121.637	828.645	1238.28	261.966	919.539	1058.78	24.9469	917.755	1082.1	361.393	840.402	1038.5	198.934	861.286	692.971	-115.445	645.589	792.441	-75.2064	661.092	804.429	1.35329	567.745	808.694	-12.6554	476.334	781.875	10.94	854.683	707.736	519.726	619.758	796.18	513.642	634.007	798.198	430.265	544.646	823.207	459.486	443.534	782.678	434.309
77	0.76	768.566	1246.81	196.275	808.966	1237.59	121.579	828.647	1238.29	261.959	919.503	1058.75	24.9214	917.747	1082.08	361.364	840.499	1038.43	198.903	861.292	692.927	-115.496	645.643	792.39	-75.2498	661.119	804.395	1.31036	567.757	808.64	-12.6769	476.347	781.852	10.9094	854.681	707.727	519.725	619.777	796.185	513.644	633.994	798.171	430.24	544.633	823.176	459.456	443.555	782.625	434.274
78	0.77	768.514	1246.81	196.278	809.001	1237.56	121.561	828.632	1238.28	261.957	919.498	1058.72	24.9024	917.757	1082.05	361.339	840.561	1038.35	198.888	861.296	692.892	-115.525	645.68	792.359	-75.2617	661.146	804.371	1.29428	567.769	808.608	-12.6758	476.382	781.839	10.889	854.699	707.728	519.725	619.791	796.165	513.64	634.023	798.125	430.219	544.682	823.156	459.447	443.584	782.586	434.27
79	0.78	768.561	1246.75	196.269	808.968	1237.53	121.557	828.634	1238.27	261.954	919.483	1058.7	24.8983	917.775	1082.03	361.332	840.627	1038.26	198.9	861.328	692.859	-115.518	645.674	792.335	-75.2633	661.181	804.352	1.2928	567.767	808.595	-12.6658	476.38	781.8	10.8968	854.719	707.7	519.73	619.783	796.14	513.621	634.008	798.087	430.205	544.694	823.114	459.441	443.587	782.566	434.261
80	0.79	768.655	1246.67	196.24	808.956	1237.5	121.539	828.636	1238.24	261.951	919.474	1058.67	24.8914	917.761	1082.01	361.345	840.677	1038.21	198.902	861.34	692.832	-115.535	645.672	792.333	-75.287	661.195	804.318	1.27747	567.775	808.564	-12.6799	476.396	781.766	10.889	854.695	707.653	519.721	619.765	796.129	513.632	634.029	798.055	430.207	544.695	823.078	459.435	443.602	782.545	434.247
81	0.8	768.625	1246.69	196.24	808.96	1237.52	121.517	828.648	1238.23	261.959	919.491	1058.66	24.9068	917.795	1082	361.34	840.678	1038.22	198.907	861.349	692.834	-115.551	645.669	792.344	-75.2843	661.195	804.321	1.28116	567.799	808.562	-12.6904	476.422	781.783	10.8982	854.7	707.63	519.735	619.784	796.115	513.641	634.101	798.052	430.225	544.731	823.083	459.45	443.596	782.544	434.251
82	0.81	768.593	1246.76	196.267	808.924	1237.56	121.557	828.643	1238.24	261.961	919.478	1058.7	24.9283	917.808	1082.03	361.368	840.612	1038.31	198.958	861.317	692.885	-115.524	645.664	792.383	-75.2222	661.149	804.365	1.33612	567.78	808.583	-12.6508	476.398	781.809	10.9368	854.738	707.624	519.737	619.816	796.114	513.645	634.135	798.074	430.25	544.762	823.111	459.493	443.582	782.591	434.287
83	0.82	768.478	1246.82	196.286	808.844	1237.61	121.616	828.596	1238.24	261.971	919.436	1058.73	24.9631	917.751	1082.06	361.395	840.437	1038.41	199	861.287	692.951	-115.465	645.59	792.429	-75.1764	661.082	804.407	1.37895	567.738	808.644	-12.6167	476.323	781.84	10.9941	854.714	707.617	519.732	619.804	796.106	513.648	634.113	798.124	430.299	544.745	823.145	459.519	443.578	782.648	434.322
84	0.83	768.411	1246.89	196.276	808.788	1237.64	121.616	828.572	1238.23	261.979	919.406	1058.77	24.9818	917.723	1082.08	361.411	840.367	1038.47	198.996	861.253	692.999	-115.436	645.554	792.45	-75.1892	661.057	804.45	1.37391	567.69	808.686	-12.6222	476.334	781.871	10.9821	854.693	707.616	519.72	619.774	796.107	513.643	634.12	798.172	430.343	544.757	823.179	459.522	443.558	782.689	434.324
85	0.84	768.41	1246.91	196.285	808.783	1237.64	121.623	828.565	1238.26	261.991	919.392	1058.78	24.9825	917.714	1082.08	361.412	840.331	1038.47	199.007	861.245	693.001	-115.452	645.57	792.446	-75.2081	661.055	804.456	1.3764	567.693	808.694	-12.6356	476.337	781.879	10.9576	854.686	707.634	519.723	619.79	796.131	513.641	634.133	798.188	430.332	544.76	823.19	459.518	443.55	782.683	434.323
86	0.85	768.407	1246.88	196.318	808.82	1237.62	121.633	828.574	1238.27	261.99	919.376	1058.78	24.9627	917.727	1082.08	361.41	840.371	1038.41	198.989	861.245	692.965	-115.462	645.57	792.431	-75.214	661.076	804.431	1.36744	567.712	808.663	-12.6369	476.297	781.853	10.9624	854.696	707.666	519.736	619.784	796.144	513.642	634.051	798.174	430.283	544.71	823.173	459.491	443.563	782.652	434.309
87	0.86	768.388	1246.83	196.328	808.873	1237.58	121.622	828.545	1238.28	261.995	919.347	1058.76	24.9513	917.735	1082.05	361.379	840.426	1038.33	198.946	861.275	692.913	-115.495	645.626	792.388	-75.229	661.129	804.395	1.33126	567.753	808.619	-12.6578	476.325	781.819	10.9386	854.679	707.677	519.741	619.756	796.151	513.648	633.972	798.149	430.233	544.665	823.152	459.45	443.575	782.601	434.26
88	0.87	768.426	1246.78	196.325	808.906	1237.54	121.6	828.506	1238.27	262.01	919.32	1058.72	24.912	917.721	1082.01	361.338	840.521	1038.26	198.903	861.316	692.846	-115.558	645.644	792.343	-75.2784	661.182	804.349	1.26017	567.779	808.593	-12.7171	476.37	781.794	10.8862	854.672	707.686	519.747	619.73	796.15	513.651	633.958	798.089	430.199	544.639	823.125	459.414	443.594	782.554	434.226
89	0.88	768.474	1246.75	196.336	808.878	1237.54	121.604	828.523	1238.26	262.016	919.309	1058.7	24.9068	917.69	1081.99	361.326	840.57	1038.26	198.871	861.308	692.809	-115.564	645.637	792.328	-75.2928	661.165	804.328	1.25232	567.789	808.582	-12.7219	476.385	781.783	10.8625	854.685	707.711	519.765	619.746	796.151	513.65	633.937	798.064	430.185	544.641	823.116	459.412	443.585	782.542	434.216
90	0.89	768.406	1246.79	196.396	808.848	1237.57	121.672	828.557	1238.25	262.036	919.33	1058.7	24.9262	917.712	1082.01	361.363	840.561	1038.31	198.908	861.288	692.838	-115.53	645.653	792.343	-75.2603	661.126	804.339	1.29104	567.762	808.586	-12.6892	476.394	781.794	10.9035	854.698	707.717	519.768	619.773	796.146	513.643	633.969	798.09	430.212	544.666	823.129	459.442	443.576	782.557	434.252
91	0.9	768.448	1246.84	196.463	808.832	1237.6	121.744	828.612	1238.24	262.064	919.375	1058.73	24.9639	917.738	1082.04	361.401	840.506	1038.37	198.977	861.274	692.905	-115.485	645.635	792.385	-75.2126	661.099	804.389	1.33226	567.737	808.627	-12.6395	476.396	781.821	10.952	854.679	707.686	519.769	619.801	796.126	513.65	634.053	798.125	430.264	544.698	823.139	459.466	443.596	782.605	434.308
92	0.91	768.553	1246.83	196.502	808.805	1237.66	121.792	828.625	1238.22	262.1	919.392	1058.74	24.9899	917.759	1082.06	361.427	840.464	1038.43	199.015	861.261	692.966	-115.464	645.631	792.437	-75.1788	661.08	804.423	1.38524	567.738	808.657	-12.601	476.383	781.847	10.9686	854.657	707.659	519.781	619.791	796.106	513.668	634.141	798.157	430.311	544.722	823.16	459.526	443.604	782.639	434.337
93	0.92	768.594	1246.83	196.541	808.772	1237.68	121.836	828.648	1238.22	262.109	919.399	1058.75	24.9955	917.782	1082.08	361.438	840.465	1038.43	199.04	861.254	693.001	-115.471	645.654	792.457	-75.1772	661.056	804.426	1.38969	567.698	808.659	-12.6068	476.375	781.871	10.9805	854.657	707.629	519.771	619.781	796.101	513.666	634.171	798.168	430.329	544.738	823.184	459.533	443.603	782.664	434.348
94	0.93	768.692	1246.8	196.558	808.771	1237.65	121.865	828.703	1238.21	262.125	919.404	1058.73	24.9937	917.789	1082.07	361.408	840.516	1038.38	199.023	861.305	692.979	-115.501	645.663	792.446	-75.1972	661.098	804.398	1.38543	567.739	808.635	-12.5984	476.35	781.87	10.9816	854.701	707.639	519.769	619.761	796.099	513.67	634.189	798.159	430.324	544.701	823.155	459.511	443.614	782.647	434.338
95	0.94	768.753	1246.8	196.562	808.828	1237.64	121.849	828.696	1238.21	262.137	919.401	1058.71	24.9791	917.774	1082.06	361.384	840.486	1038.36	198.99	861.343	692.917	-115.513	645.671	792.418	-75.221	661.124	804.379	1.36963	567.803	808.614	-12.6191	476.368	781.862	10.9516	854.721	707.656	519.753	619.761	796.129	513.669	634.157	798.136	430.302	544.683	823.139	459.489	443.595	782.624	434.31
96	0.95	768.681	1246.83	196.57	808.831	1237.64	121.826	828.699	1238.22	262.125	919.375	1058.68	24.9679	917.768	1082.04	361.369	840.438	1038.33	198.972	861.313	692.869	-115.509	645.65	792.385	-75.2447	661.11	804.355	1.32304	567.779	808.603	-12.6715	476.359	781.843	10.9176	854.748	707.678	519.749	619.756	796.143	513.65	634.07	798.103	430.268	544.708	823.139	459.468	443.563	782.609	434.278
97	0.96	768.616	1246.89	196.541	808.814	1237.64	121.794	828.699	1238.25	262.091	919.343	1058.66	24.9644	917.764	1082.05	361.372	840.407	1038.31	198.958	861.291	692.809	-115.529	645.633	792.375	-75.2676	661.092	804.339	1.29196	567.738	808.628	-12.7056	476.337	781.813	10.8867	854.768	707.687	519.739	619.735	796.131	513.626	634.024	798.083	430.24	544.69	823.131	459.438	443.529	782.603	434.249
98	0.97	768.685	1246.87	196.501	808.837	1237.64	121.779	828.715	1238.26	262.078	919.318	1058.65	24.9678	917.762	1082.06	361.391	840.412	1038.28	198.973	861.307	692.786	-115.529	645.619	792.369	-75.2674	661.112	804.329	1.28689	567.751	808.627	-12.688	476.336	781.825	10.8793	854.817	707.685	519.747	619.754	796.135	513.622	634.026	798.084	430.224	544.677	823.107	459.426	443.556	782.606	434.253
99	0.98	768.763	1246.86	196.53	808.862	1237.62	121.811	828.728	1238.27	262.092	919.315	1058.65	25.002	917.779	1082.06	361.433	840.432	1038.27	198.992	861.308	692.815	-115.508	645.599	792.376	-75.2506	661.094	804.359	1.3062	567.755	808.628	-12.6758	476.328	781.838	10.9092	854.802	707.68	519.756	619.785	796.139	513.622	633.916	798.209	430.098	544.668	823.107	459.441	443.579	782.616	434.272
100	0.99	768.803	1246.84	196.558	808.871	1237.63	121.83	828.763	1238.3	262.103	919.313	1058.64	25.0367	917.791	1082.07	361.474	840.417	1038.28	199.032	861.263	692.846	-115.491	645.622	792.388	-75.2121	661.083	804.379	1.34642	567.742	808.626	-12.6261	476.334	781.821	10.9436	854.771	707.665	519.779	619.801	796.121	513.638	633.786	798.371	429.939	544.661	823.1	459.462	443.585	782.614	434.284
101	1	768.821	1246.83	196.498	808.9	1237.63	121.802	828.756	1238.31	262.08	919.334	1058.63	25.0428	917.814	1082.07	361.479	840.495	1038.26	199.039	861.273	692.888	-115.506	645.65	792.393	-75.2198	661.102	804.367	1.34779	567.752	808.621	-12.6218	476.358	781.819	10.9456	854.74	707.642	519.786	619.771	796.093	513.648	634.052	798.19	430.202	544.679	823.103	459.474	443.605	782.601	434.292
102	1.01	768.818	1246.86	196.47	808.963	1237.62	121.797	828.758	1238.3	262.053	919.352	1058.64	25.0376	917.835	1082.06	361.486	840.55	1038.24	199.074	861.308	692.895	-115.502	645.686	792.406	-75.2253	661.129	804.364	1.33485	567.776	808.611	-12.6464	476.365	781.829	10.9506	854.75	707.656	519.808	619.78	796.095	513.672	634.117	798.143	430.258	544.713	823.125	459.499	443.641	782.615	434.298
103	1.02	768.78	1246.93	196.471	808.98	1237.66	121.788	828.784	1238.32	262.063	919.354	1058.67	25.0578	917.823	1082.07	361.507	840.47	1038.3	199.106	861.282	692.936	-115.484	645.642	792.431	-75.1935	661.108	804.371	1.36079	567.745	808.628	-12.6607	476.326	781.85	10.9597	854.757	707.662	519.801	619.811	796.111	513.676	634.122	798.128	430.296	544.732	823.15	459.509	443.618	782.64	434.3
104	1.03	768.74	1246.97	196.478	808.956	1237.69	121.807	828.806	1238.34	262.054	919.343	1058.7	25.0783	917.813	1082.07	361.545	840.407	1038.35	199.126	861.241	692.958	-115.481	645.598	792.451	-75.1722	661.074	804.398	1.36546	567.678	808.654	-12.6247	476.295	781.862	10.968	854.745	707.667	519.8	619.81	796.109	513.665	634.112	798.132	430.312	544.732	823.16	459.503	443.587	782.639	434.32
105	1.04	768.711	1246.99	196.442	809	1237.71	121.762	828.812	1238.36	262.034	919.356	1058.71	25.0701	917.79	1082.07	361.527	840.434	1038.34	199.097	861.277	692.973	-115.485	645.62	792.458	-75.1967	661.06	804.404	1.34034	567.689	808.649	-12.6341	476.311	781.878	10.9356	854.726	707.679	519.797	619.78	796.119	513.646	634.129	798.136	430.296	544.736	823.17	459.485	443.584	782.632	434.288
106	1.05	768.809	1246.98	196.412	809.098	1237.7	121.717	828.786	1238.36	262.043	919.388	1058.71	25.0469	917.795	1082.05	361.502	840.541	1038.32	199.082	861.312	692.965	-115.495	645.655	792.441	-75.2269	661.093	804.38	1.32526	567.706	808.635	-12.6625	476.333	781.887	10.9166	854.693	707.672	519.799	619.773	796.13	513.656	634.109	798.13	430.271	544.742	823.162	459.486	443.575	782.623	434.257
107	1.06	768.906	1246.96	196.401	809.165	1237.7	121.724	828.781	1238.38	262.058	919.395	1058.72	25.0555	917.81	1082.04	361.503	840.57	1038.32	199.076	861.333	692.968	-115.496	645.677	792.429	-75.2217	661.134	804.368	1.31578	567.705	808.622	-12.6512	476.351	781.849	10.9348	854.666	707.672	519.785	619.757	796.135	513.669	634.019	798.118	430.246	544.715	823.146	459.482	443.58	782.609	434.262
108	1.07	768.944	1246.96	196.411	809.207	1237.7	121.75	828.817	1238.39	262.07	919.399	1058.72	25.0822	917.828	1082.04	361.513	840.594	1038.29	199.073	861.311	692.977	-115.501	645.668	792.432	-75.2201	661.134	804.374	1.33249	567.724	808.616	-12.6478	476.331	781.836	10.9473	854.692	707.683	519.787	619.751	796.141	513.672	634.004	798.132	430.251	544.693	823.152	459.473	443.602	782.606	434.279
109	1.08	768.909	1247.01	196.443	809.236	1237.73	121.749	828.831	1238.38	262.083	919.446	1058.74	25.0818	917.856	1082.04	361.522	840.582	1038.31	199.059	861.31	693.003	-115.51	645.641	792.44	-75.222	661.112	804.384	1.33753	567.744	808.617	-12.6433	476.309	781.851	10.9329	854.713	707.679	519.786	619.752	796.158	513.656	634.057	798.142	430.266	544.72	823.165	459.477	443.593	782.617	434.281
110	1.09	768.956	1247.06	196.47	809.304	1237.77	121.798	828.851	1238.38	262.093	919.475	1058.75	25.0809	917.867	1082.03	361.53	840.57	1038.36	199.09	861.303	693.022	-115.483	645.624	792.442	-75.2129	661.125	804.39	1.3596	567.711	808.63	-12.6503	476.304	781.868	10.9354	854.703	707.658	519.777	619.777	796.144	513.663	634.06	798.137	430.279	544.746	823.182	459.498	443.587	782.634	434.289
111	1.1	768.942	1247.1	196.484	809.339	1237.8	121.846	828.897	1238.39	262.118	919.485	1058.73	25.088	917.883	1082.01	361.526	840.545	1038.38	199.086	861.306	692.997	-115.456	645.604	792.444	-75.2062	661.083	804.396	1.37957	567.713	808.627	-12.651	476.285	781.882	10.9481	854.729	707.617	519.761	619.807	796.123	513.665	634.093	798.126	430.302	544.767	823.186	459.492	443.571	782.641	434.304
112	1.11	768.986	1247.1	196.521	809.392	1237.82	121.877	828.996	1238.38	262.148	919.539	1058.73	25.0913	917.934	1081.98	361.524	840.546	1038.38	199.08	861.306	692.971	-115.46	645.627	792.418	-75.1985	661.063	804.375	1.38398	567.721	808.625	-12.6513	476.298	781.86	10.9419	854.758	707.596	519.754	619.834	796.102	513.662	634.118	798.084	430.293	544.77	823.158	459.475	443.567	782.625	434.311
113	1.12	769.187	1247.07	196.54	809.42	1237.82	121.885	829.083	1238.37	262.152	919.581	1058.7	25.0684	917.978	1081.96	361.507	840.599	1038.35	199.08	861.317	692.933	-115.474	645.622	792.413	-75.2102	661.105	804.359	1.35813	567.733	808.623	-12.6493	476.318	781.827	10.9125	854.796	707.566	519.743	619.845	796.088	513.642	634.146	798.059	430.281	544.786	823.117	459.46	443.573	782.604	434.296
114	1.13	769.303	1247.04	196.593	809.474	1237.79	121.906	829.179	1238.36	262.172	919.573	1058.67	25.0669	918.005	1081.92	361.501	840.71	1038.27	199.084	861.349	692.894	-115.494	645.626	792.392	-75.2293	661.123	804.335	1.34994	567.779	808.579	-12.6649	476.336	781.798	10.9186	854.786	707.526	519.74	619.848	796.08	513.649	634.118	798.033	430.27	544.766	823.081	459.459	443.594	782.583	434.295
115	1.14	769.393	1247.03	196.601	809.543	1237.79	121.924	829.218	1238.36	262.195	919.585	1058.66	25.0509	918.039	1081.91	361.506	840.777	1038.23	199.091	861.34	692.887	-115.503	645.657	792.376	-75.2473	661.127	804.323	1.35183	567.796	808.555	-12.6579	476.348	781.788	10.923	854.739	707.502	519.737	619.821	796.08	513.651	634.136	798.054	430.262	544.747	823.068	459.456	443.599	782.575	434.281
116	1.15	769.464	1247.04	196.663	809.574	1237.82	121.982	829.286	1238.38	262.233	919.614	1058.68	25.0687	918.051	1081.94	361.524	840.811	1038.23	199.113	861.311	692.933	-115.477	645.68	792.39	-75.2251	661.174	804.338	1.36236	567.805	808.56	-12.6243	476.366	781.818	10.9355	854.695	707.507	519.746	619.834	796.091	513.661	634.126	798.087	430.263	544.774	823.108	459.489	443.62	782.59	434.306
117	1.16	769.434	1247.13	196.708	809.541	1237.87	122.048	829.322	1238.42	262.256	919.608	1058.72	25.0955	918.044	1081.96	361.539	840.684	1038.33	199.153	861.293	692.997	-115.452	645.639	792.435	-75.1772	661.16	804.385	1.3778	567.746	808.618	-12.6019	476.364	781.862	10.9515	854.702	707.538	519.741	619.831	796.122	513.657	634.105	798.136	430.279	544.75	823.154	459.504	443.61	782.635	434.337
118	1.17	769.4	1247.2	196.701	809.495	1237.92	122.057	829.312	1238.45	262.245	919.591	1058.75	25.1018	918.024	1081.98	361.544	840.619	1038.43	199.126	861.264	693.04	-115.433	645.601	792.467	-75.1628	661.126	804.418	1.38443	567.685	808.706	-12.6015	476.315	781.894	10.9772	854.698	707.547	519.705	619.796	796.145	513.654	634.073	798.173	430.29	544.723	823.211	459.497	443.586	782.675	434.336
119	1.18	769.438	1247.25	196.664	809.464	1237.95	122.031	829.293	1238.47	262.224	919.567	1058.75	25.0834	918.032	1082.01	361.512	840.66	1038.45	199.091	861.278	693.033	-115.446	645.602	792.477	-75.1877	661.095	804.44	1.35558	567.723	808.71	-12.6524	476.324	781.927	10.9525	854.71	707.58	519.688	619.779	796.178	513.635	634.05	798.197	430.269	544.713	823.239	459.485	443.564	782.704	434.31
120	1.19	769.519	1247.25	196.658	809.485	1237.96	122.017	829.337	1238.48	262.206	919.568	1058.73	25.0623	918.038	1082.01	361.489	840.662	1038.42	199.095	861.276	693.008	-115.474	645.614	792.476	-75.2078	661.077	804.435	1.34674	567.738	808.684	-12.6964	476.329	781.919	10.9353	854.736	707.625	519.708	619.794	796.179	513.636	634.032	798.179	430.25	544.696	823.228	459.481	443.567	782.693	434.311
121	1.2	769.555	1247.21	196.648	809.598	1237.93	122.004	829.385	1238.49	262.192	919.574	1058.69	25.0545	918.078	1082	361.497	840.657	1038.38	199.077	861.28	692.96	-115.481	645.614	792.449	-75.2118	661.11	804.408	1.33001	567.736	808.662	-12.6878	476.353	781.872	10.9197	854.743	707.63	519.719	619.794	796.152	513.641	634.016	798.128	430.241	544.69	823.184	459.469	443.591	782.647	434.301
122	1.21	769.584	1247.17	196.644	809.706	1237.87	121.986	829.457	1238.51	262.217	919.571	1058.66	25.0506	918.095	1081.97	361.494	840.774	1038.27	199.071	861.301	692.91	-115.512	645.668	792.4	-75.2405	661.141	804.342	1.33445	567.779	808.599	-12.6674	476.406	781.828	10.9252	854.706	707.593	519.732	619.799	796.13	513.649	634.027	798.081	430.206	544.714	823.118	459.468	443.612	782.587	434.277
123	1.22	769.685	1247.12	196.632	809.765	1237.83	121.939	829.474	1238.49	262.189	919.572	1058.63	25.0323	918.116	1081.93	361.48	840.904	1038.18	199.058	861.335	692.862	-115.549	645.713	792.371	-75.2562	661.168	804.285	1.32252	567.833	808.549	-12.6771	476.427	781.777	10.9235	854.688	707.559	519.732	619.814	796.108	513.651	634.059	798.039	430.194	544.735	823.087	459.459	443.604	782.547	434.255
124	1.23	769.651	1247.14	196.625	809.746	1237.83	121.925	829.457	1238.48	262.152	919.575	1058.62	25.0477	918.112	1081.91	361.487	840.945	1038.16	199.065	861.356	692.836	-115.538	645.676	792.365	-75.2285	661.186	804.278	1.32458	567.823	808.528	-12.6651	476.401	781.761	10.9316	854.714	707.565	519.729	619.814	796.111	513.662	634.072	798.029	430.21	544.735	823.096	459.479	443.584	782.535	434.28
125	1.24	769.586	1247.2	196.58	809.669	1237.88	121.915	829.447	1238.49	262.118	919.566	1058.66	25.0465	918.08	1081.95	361.493	840.798	1038.27	199.07	861.306	692.873	-115.49	645.606	792.403	-75.2011	661.131	804.328	1.35207	567.749	808.58	-12.6598	476.314	781.798	10.9526	854.735	707.583	519.718	619.805	796.13	513.652	634.054	798.063	430.238	544.713	823.123	459.474	443.574	782.575	434.287
126	1.25	769.464	1247.3	196.552	809.616	1237.95	121.883	829.382	1238.51	262.074	919.559	1058.7	25.0559	918.066	1081.99	361.491	840.679	1038.38	199.059	861.287	692.945	-115.479	645.567	792.449	-75.1924	661.074	804.392	1.35961	567.719	808.639	-12.6607	476.275	781.876	10.9729	854.745	707.595	519.717	619.822	796.14	513.659	634.097	798.107	430.272	544.733	823.159	459.479	443.575	782.63	434.283
127	1.26	769.415	1247.36	196.524	809.614	1238	121.87	829.374	1238.52	262.061	919.564	1058.72	25.0601	918.042	1082.02	361.492	840.616	1038.45	199.091	861.312	693.009	-115.455	645.575	792.479	-75.1789	661.067	804.44	1.37056	567.683	808.691	-12.6456	476.288	781.924	10.984	854.761	707.617	519.734	619.82	796.138	513.646	634.167	798.16	430.31	544.744	823.192	459.489	443.6	782.684	434.307
128	1.27	769.409	1247.38	196.528	809.625	1238	121.888	829.398	1238.53	262.085	919.576	1058.74	25.0662	918.04	1082.03	361.504	840.643	1038.46	199.106	861.315	693.027	-115.423	645.588	792.471	-75.1491	661.071	804.449	1.39984	567.677	808.697	-12.593	476.316	781.914	11.0033	854.74	707.601	519.736	619.843	796.129	513.652	634.157	798.175	430.319	544.769	823.21	459.531	443.59	782.711	434.346
129	1.28	769.442	1247.34	196.495	809.702	1237.95	121.824	829.394	1238.53	262.052	919.57	1058.72	25.0465	918.014	1082.02	361.475	840.715	1038.41	199.067	861.354	692.987	-115.456	645.615	792.451	-75.1771	661.125	804.425	1.36649	567.726	808.657	-12.606	476.315	781.881	11.0123	854.728	707.597	519.735	619.803	796.117	513.659	634.134	798.149	430.296	544.775	823.188	459.529	443.597	782.674	434.32
130	1.29	769.572	1247.25	196.395	809.786	1237.89	121.718	829.38	1238.52	261.996	919.572	1058.7	25.0017	918.02	1081.99	361.433	840.836	1038.32	199.013	861.391	692.915	-115.521	645.657	792.398	-75.2191	661.169	804.366	1.32494	567.776	808.597	-12.6594	476.325	781.846	10.9631	854.748	707.608	519.727	619.801	796.128	513.649	634.095	798.117	430.241	544.79	823.154	459.496	443.621	782.619	434.274
131	1.3	769.483	1247.24	196.357	809.784	1237.86	121.684	829.353	1238.53	261.957	919.572	1058.67	24.9709	917.995	1081.97	361.387	840.811	1038.28	198.97	861.366	692.863	-115.529	645.678	792.354	-75.2489	661.152	804.333	1.30831	567.787	808.575	-12.6926	476.375	781.8	10.9278	854.761	707.621	519.724	619.801	796.132	513.633	634.058	798.088	430.213	544.742	823.124	459.458	443.611	782.593	434.252
132	1.31	769.355	1247.27	196.339	809.721	1237.86	121.672	829.309	1238.51	261.936	919.557	1058.66	24.9729	917.99	1081.98	361.374	840.684	1038.32	198.941	861.359	692.837	-115.514	645.662	792.371	-75.2508	661.132	804.331	1.30066	567.755	808.582	-12.7145	476.353	781.807	10.9282	854.734	707.632	519.733	619.808	796.152	513.628	634.008	798.065	430.224	544.69	823.12	459.445	443.582	782.576	434.249
133	1.32	769.326	1247.29	196.302	809.657	1237.86	121.637	829.277	1238.5	261.909	919.562	1058.64	24.9707	917.989	1081.98	361.375	840.7	1038.32	198.92	861.347	692.82	-115.502	645.644	792.391	-75.2397	661.146	804.341	1.28056	567.735	808.605	-12.718	476.343	781.816	10.9451	854.752	707.662	519.75	619.827	796.166	513.637	634.053	798.051	430.227	544.711	823.123	459.447	443.582	782.568	434.252
134	1.33	769.384	1247.26	196.269	809.681	1237.84	121.582	829.307	1238.49	261.881	919.571	1058.63	24.9532	917.992	1081.98	361.346	840.773	1038.32	198.92	861.323	692.813	-115.527	645.646	792.379	-75.2741	661.154	804.353	1.26427	567.782	808.608	-12.7086	476.366	781.83	10.9165	854.785	707.69	519.758	619.842	796.158	513.63	634.104	798.058	430.233	544.737	823.093	459.452	443.603	782.575	434.245
135	1.34	769.409	1247.24	196.268	809.695	1237.86	121.565	829.268	1238.46	261.856	919.591	1058.62	24.9575	917.976	1081.99	361.352	840.768	1038.34	198.927	861.338	692.815	-115.527	645.668	792.383	-75.2864	661.164	804.361	1.28681	567.816	808.604	-12.7063	476.356	781.851	10.9362	854.789	707.706	519.766	619.846	796.142	513.621	634.125	798.064	430.25	544.722	823.103	459.437	443.61	782.591	434.243
136	1.35	769.326	1247.29	196.287	809.642	1237.88	121.572	829.247	1238.46	261.85	919.588	1058.62	24.9697	917.982	1082.02	361.38	840.661	1038.41	198.945	861.379	692.837	-115.499	645.655	792.405	-75.2493	661.143	804.395	1.30574	567.771	808.638	-12.6908	476.37	781.878	10.9425	854.768	707.692	519.764	619.841	796.145	513.625	634.141	798.089	430.271	544.726	823.147	459.435	443.603	782.64	434.266
137	1.36	769.232	1247.32	196.316	809.567	1237.9	121.605	829.254	1238.46	261.848	919.583	1058.63	24.9803	917.968	1082.05	361.398	840.591	1038.49	198.982	861.356	692.874	-115.466	645.623	792.451	-75.2086	661.098	804.437	1.33045	567.761	808.637	-12.653	476.332	781.891	10.971	854.724	707.663	519.74	619.804	796.127	513.624	634.205	798.136	430.308	544.763	823.182	459.469	443.6	782.68	434.306
138	1.37	769.195	1247.32	196.356	809.481	1237.9	121.637	829.263	1238.46	261.838	919.556	1058.63	24.9779	917.963	1082.06	361.396	840.599	1038.51	199.037	861.309	692.91	-115.437	645.603	792.476	-75.1752	661.073	804.448	1.3596	567.726	808.643	-12.6036	476.304	781.903	11.0102	854.745	707.649	519.742	619.808	796.124	513.629	634.206	798.17	430.326	544.773	823.185	459.517	443.603	782.686	434.333
139	1.38	769.163	1247.29	196.343	809.467	1237.87	121.625	829.254	1238.45	261.826	919.548	1058.63	24.9787	917.94	1082.05	361.39	840.678	1038.44	199.053	861.304	692.872	-115.447	645.601	792.454	-75.1658	661.055	804.429	1.38324	567.713	808.64	-12.6042	476.334	781.898	11.0303	854.739	707.643	519.744	619.798	796.117	513.635	634.126	798.175	430.302	544.738	823.168	459.522	443.585	782.676	434.326
140	1.39	769.233	1247.21	196.281	809.526	1237.8	121.551	829.208	1238.46	261.814	919.535	1058.62	24.9464	917.9	1082.01	361.353	840.702	1038.35	198.99	861.33	692.799	-115.498	645.621	792.407	-75.2082	661.086	804.386	1.33702	567.723	808.606	-12.6596	476.359	781.856	10.9891	854.704	707.626	519.721	619.761	796.129	513.639	634.065	798.13	430.254	544.727	823.149	459.48	443.579	782.63	434.291
141	1.4	769.293	1247.15	196.208	809.541	1237.76	121.489	829.169	1238.47	261.781	919.496	1058.58	24.9096	917.886	1081.99	361.299	840.771	1038.26	198.921	861.354	692.725	-115.552	645.635	792.358	-75.2836	661.133	804.342	1.2708	567.735	808.567	-12.7018	476.37	781.817	10.9131	854.715	707.641	519.7	619.758	796.145	513.628	633.994	798.065	430.174	544.716	823.112	459.439	443.568	782.566	434.249
142	1.41	769.247	1247.16	196.152	809.538	1237.74	121.447	829.157	1238.48	261.765	919.488	1058.57	24.8958	917.879	1082	361.275	840.786	1038.23	198.886	861.326	692.685	-115.567	645.655	792.336	-75.3244	661.147	804.327	1.23043	567.752	808.555	-12.7267	476.408	781.801	10.8948	854.746	707.672	519.703	619.795	796.175	513.618	633.974	798.032	430.14	544.695	823.096	459.412	443.571	782.534	434.228
143	1.42	769.156	1247.18	196.136	809.532	1237.75	121.428	829.175	1238.48	261.759	919.485	1058.57	24.8916	917.896	1082.02	361.276	840.699	1038.28	198.862	861.32	692.712	-115.572	645.657	792.361	-75.3234	661.123	804.342	1.24185	567.781	808.576	-12.7474	476.38	781.824	10.9044	854.759	707.677	519.71	619.824	796.18	513.625	634.023	798.039	430.168	544.721	823.097	459.401	443.588	782.555	434.227
144	1.43	769.211	1247.17	196.118	809.494	1237.78	121.441	829.172	1238.47	261.765	919.477	1058.58	24.8994	917.887	1082.03	361.298	840.607	1038.34	198.893	861.334	692.776	-115.536	645.629	792.397	-75.2973	661.102	804.37	1.25565	567.743	808.63	-12.7121	476.357	781.85	10.9353	854.761	707.667	519.724	619.799	796.158	513.617	634.096	798.071	430.231	544.738	823.127	459.428	443.599	782.603	434.249
145	1.44	769.239	1247.19	196.149	809.432	1237.81	121.495	829.199	1238.47	261.802	919.484	1058.61	24.9378	917.89	1082.05	361.341	840.582	1038.41	198.969	861.309	692.833	-115.466	645.569	792.44	-75.2194	661.066	804.397	1.33017	567.702	808.659	-12.6406	476.322	781.872	11.0079	854.776	707.667	519.735	619.815	796.132	513.638	634.166	798.11	430.295	544.755	823.162	459.479	443.6	782.65	434.316
146	1.45	769.243	1247.22	196.196	809.4	1237.84	121.538	829.215	1238.47	261.807	919.498	1058.63	24.9577	917.926	1082.08	361.381	840.571	1038.47	199.007	861.296	692.866	-115.44	645.569	792.473	-75.1631	661.069	804.443	1.36275	567.711	808.668	-12.5852	476.333	781.901	11.0285	854.831	707.668	519.758	619.887	796.121	513.66	634.23	798.131	430.34	544.794	823.16	459.523	443.594	782.691	434.366
147	1.46	769.174	1247.25	196.185	809.425	1237.83	121.525	829.199	1238.48	261.786	919.488	1058.63	24.9508	917.921	1082.05	361.372	840.611	1038.44	198.99	861.334	692.854	-115.457	645.617	792.444	-75.1956	661.095	804.438	1.34269	567.731	808.658	-12.6023	476.378	781.878	10.9981	854.848	707.667	519.771	619.865	796.114	513.646	634.236	798.133	430.33	544.807	823.148	459.497	443.599	782.682	434.354
148	1.47	769.141	1247.22	196.108	809.478	1237.81	121.448	829.162	1238.48	261.759	919.464	1058.61	24.9156	917.893	1082.04	361.335	840.616	1038.42	198.904	861.363	692.818	-115.503	645.6	792.426	-75.2459	661.127	804.42	1.29053	567.737	808.637	-12.6604	476.353	781.862	10.9613	854.786	707.663	519.748	619.806	796.117	513.618	634.195	798.114	430.297	544.774	823.142	459.442	443.598	782.649	434.292
149	1.48	769.158	1247.22	196.128	809.474	1237.79	121.429	829.149	1238.49	261.759	919.443	1058.61	24.9111	917.872	1082.05	361.326	840.609	1038.4	198.881	861.358	692.783	-115.517	645.597	792.409	-75.2618	661.103	804.392	1.27358	567.744	808.624	-12.6729	476.29	781.849	10.9604	854.769	707.701	519.745	619.801	796.142	513.622	634.111	798.089	430.259	544.724	823.154	459.439	443.593	782.624	434.284
150	1.49	769.184	1247.19	196.195	809.462	1237.78	121.468	829.12	1238.5	261.779	919.425	1058.62	24.9237	917.837	1082.04	361.339	840.665	1038.37	198.919	861.323	692.768	-115.508	645.603	792.401	-75.2475	661.083	804.367	1.30847	567.757	808.601	-12.6619	476.311	781.84	10.9771	854.772	707.73	519.765	619.795	796.161	513.647	634.019	798.089	430.228	544.716	823.155	459.481	443.616	782.604	434.297
151	1.5	769.253	1247.13	196.202	809.497	1237.77	121.476	829.105	1238.5	261.791	919.389	1058.61	24.9285	917.835	1082.02	361.337	840.783	1038.32	198.941	861.321	692.747	-115.533	645.633	792.375	-75.2528	661.139	804.34	1.3151	567.805	808.542	-12.6559	476.372	781.807	10.9629	854.752	707.716	519.786	619.788	796.148	513.666	633.98	798.11	430.213	544.699	823.135	459.484	443.624	782.585	434.294
152	1.51	769.259	1247.11	196.174	809.5	1237.76	121.465	829.108	1238.49	261.797	919.376	1058.6	24.8993	917.833	1082.01	361.315	840.759	1038.32	198.907	861.328	692.729	-115.534	645.645	792.361	-75.275	661.165	804.326	1.28232	567.766	808.554	-12.6626	476.361	781.793	10.9668	854.699	707.688	519.769	619.72	796.128	513.647	633.961	798.107	430.192	544.67	823.119	459.444	443.615	782.574	434.285
153	1.52	769.233	1247.14	196.203	809.471	1237.79	121.489	829.116	1238.5	261.815	919.396	1058.6	24.8972	917.824	1082.02	361.316	840.692	1038.36	198.889	861.276	692.759	-115.523	645.623	792.367	-75.2699	661.14	804.344	1.28195	567.758	808.577	-12.6517	476.312	781.804	10.9764	854.696	707.692	519.764	619.722	796.126	513.642	634.022	798.108	430.205	544.697	823.124	459.45	443.591	782.589	434.283
154	1.53	769.189	1247.2	196.25	809.467	1237.83	121.536	829.174	1238.5	261.833	919.427	1058.62	24.9188	917.868	1082.03	361.325	840.646	1038.42	198.908	861.308	692.784	-115.506	645.634	792.389	-75.2353	661.138	804.377	1.30403	567.75	808.609	-12.6426	476.347	781.84	10.987	854.732	707.699	519.769	619.793	796.148	513.638	634.11	798.106	430.239	544.721	823.147	459.47	443.606	782.617	434.284
155	1.54	769.224	1247.25	196.245	809.49	1237.86	121.552	829.223	1238.48	261.842	919.442	1058.64	24.9297	917.891	1082.04	361.33	840.651	1038.48	198.897	861.339	692.8	-115.505	645.642	792.421	-75.2411	661.145	804.414	1.30214	567.7	808.633	-12.6633	476.379	781.888	10.9798	854.742	707.689	519.758	619.847	796.16	513.635	634.134	798.103	430.269	544.765	823.17	459.474	443.597	782.641	434.294
156	1.55	769.109	1247.3	196.235	809.442	1237.89	121.545	829.233	1238.46	261.824	919.459	1058.63	24.9221	917.867	1082.05	361.317	840.548	1038.54	198.865	861.311	692.866	-115.499	645.595	792.45	-75.2744	661.086	804.446	1.27351	567.662	808.674	-12.7023	476.3	781.922	10.9643	854.77	707.685	519.746	619.822	796.141	513.615	634.173	798.105	430.291	544.771	823.19	459.452	443.57	782.67	434.277
157	1.56	769.141	1247.29	196.274	809.412	1237.91	121.573	829.253	1238.45	261.83	919.463	1058.61	24.9176	917.866	1082.04	361.331	840.52	1038.55	198.877	861.276	692.871	-115.496	645.566	792.463	-75.262	661.074	804.458	1.28244	567.668	808.717	-12.6825	476.297	781.916	10.9625	854.809	707.682	519.752	619.835	796.12	513.613	634.21	798.109	430.3	544.775	823.166	459.462	443.562	782.676	434.286
158	1.57	769.242	1247.26	196.305	809.437	1237.89	121.612	829.287	1238.44	261.853	919.491	1058.6	24.9348	917.888	1082.02	361.335	840.644	1038.5	198.922	861.299	692.844	-115.499	645.585	792.44	-75.2492	661.129	804.43	1.29589	567.716	808.695	-12.6739	476.356	781.897	10.9753	854.826	707.659	519.757	619.862	796.119	513.623	634.206	798.096	430.304	544.815	823.141	459.485	443.599	782.648	434.302
159	1.58	769.312	1247.21	196.332	809.466	1237.86	121.627	829.308	1238.44	261.874	919.507	1058.59	24.9431	917.9	1082	361.322	840.674	1038.45	198.927	861.346	692.794	-115.503	645.618	792.406	-75.2558	661.147	804.394	1.2924	567.782	808.633	-12.6673	476.394	781.855	10.9508	854.825	707.653	519.752	619.836	796.107	513.63	634.171	798.079	430.28	544.822	823.123	459.49	443.633	782.627	434.304
160	1.59	769.339	1247.19	196.306	809.48	1237.83	121.593	829.266	1238.44	261.871	919.469	1058.56	24.9264	917.892	1081.99	361.31	840.631	1038.39	198.901	861.345	692.751	-115.533	645.64	792.375	-75.2898	661.131	804.367	1.28411	567.773	808.591	-12.6904	476.376	781.82	10.9232	854.783	707.655	519.732	619.806	796.111	513.621	634.111	798.068	430.246	544.766	823.097	459.449	443.601	782.6	434.261
161	1.6	769.519	1247.12	196.303	809.522	1237.81	121.559	829.268	1238.45	261.879	919.438	1058.54	24.9274	917.856	1081.98	361.314	840.747	1038.32	198.898	861.317	692.722	-115.582	645.684	792.347	-75.3229	661.128	804.346	1.26596	567.756	808.555	-12.7079	476.348	781.794	10.9223	854.755	707.657	519.742	619.788	796.11	513.637	634.066	798.067	430.221	544.717	823.06	459.44	443.636	782.569	434.268
162	1.61	769.527	1247.13	196.348	809.538	1237.81	121.596	829.283	1238.48	261.879	919.442	1058.55	24.9664	917.84	1081.99	361.34	840.81	1038.29	198.946	861.34	692.721	-115.561	645.683	792.359	-75.2912	661.15	804.336	1.28498	567.784	808.549	-12.6849	476.352	781.804	10.947	854.765	707.651	519.753	619.793	796.113	513.662	634.026	798.071	430.218	544.713	823.064	459.457	443.651	782.56	434.281
163	1.62	769.444	1247.19	196.379	809.49	1237.83	121.65	829.301	1238.53	261.877	919.414	1058.55	24.9969	917.862	1082.02	361.374	840.75	1038.33	199.005	861.33	692.735	-115.489	645.632	792.389	-75.2434	661.136	804.352	1.33079	567.738	808.572	-12.6318	476.343	781.829	10.9888	854.775	707.673	519.767	619.805	796.129	513.673	634.007	798.086	430.24	544.713	823.103	459.483	443.62	782.582	434.309
164	1.63	769.321	1247.26	196.336	809.407	1237.87	121.629	829.282	1238.57	261.855	919.385	1058.57	24.9975	917.862	1082.05	361.39	840.58	1038.43	198.976	861.315	692.781	-115.474	645.572	792.419	-75.2288	661.102	804.395	1.31903	567.651	808.606	-12.6202	476.325	781.852	10.9938	854.768	707.687	519.755	619.777	796.139	513.633	634.057	798.127	430.266	544.716	823.145	459.485	443.563	782.63	434.297
165	1.64	769.405	1247.27	196.28	809.43	1237.89	121.606	829.287	1238.58	261.848	919.386	1058.59	25.016	917.883	1082.08	361.397	840.518	1038.47	198.951	861.31	692.812	-115.47	645.59	792.426	-75.2429	661.084	804.436	1.28745	567.642	808.66	-12.6671	476.296	781.889	10.9877	854.763	707.7	519.764	619.8	796.15	513.633	634.127	798.138	430.29	544.73	823.177	459.479	443.562	782.665	434.302
166	1.65	769.423	1247.28	196.257	809.517	1237.9	121.576	829.298	1238.58	261.854	919.406	1058.59	25.0259	917.918	1082.08	361.423	840.557	1038.48	198.992	861.337	692.816	-115.486	645.594	792.435	-75.2331	661.089	804.444	1.2898	567.698	808.668	-12.6856	476.32	781.907	10.9851	854.776	707.713	519.784	619.8	796.158	513.646	634.179	798.13	430.302	544.747	823.186	459.489	443.586	782.675	434.302
167	1.66	769.401	1247.29	196.234	809.594	1237.88	121.541	829.323	1238.57	261.849	919.43	1058.58	25.0255	917.954	1082.06	361.431	840.651	1038.43	199.027	861.353	692.811	-115.498	645.61	792.427	-75.2285	661.112	804.414	1.31524	567.748	808.647	-12.6792	476.355	781.89	10.9964	854.794	707.715	519.792	619.829	796.158	513.657	634.176	798.108	430.288	544.754	823.175	459.491	443.598	782.648	434.291
168	1.67	769.463	1247.27	196.175	809.627	1237.86	121.491	829.296	1238.57	261.82	919.446	1058.59	25.0079	917.971	1082.05	361.412	840.666	1038.4	198.998	861.362	692.803	-115.509	645.61	792.423	-75.2579	661.127	804.389	1.29223	567.769	808.622	-12.7078	476.329	781.879	10.9501	854.771	707.704	519.769	619.83	796.142	513.632	634.197	798.084	430.271	544.741	823.16	459.444	443.604	782.631	434.259
169	1.68	769.469	1247.25	196.155	809.633	1237.84	121.484	829.268	1238.56	261.802	919.467	1058.6	25.0025	917.95	1082.04	361.419	840.693	1038.37	198.978	861.329	692.809	-115.514	645.623	792.411	-75.2502	661.12	804.381	1.28419	567.768	808.598	-12.7034	476.312	781.856	10.9349	854.77	707.694	519.779	619.808	796.135	513.634	634.166	798.072	430.251	544.712	823.134	459.43	443.624	782.617	434.253
170	1.69	769.442	1247.26	196.196	809.631	1237.86	121.546	829.265	1238.57	261.827	919.484	1058.61	25.0252	917.945	1082.04	361.439	840.702	1038.38	198.988	861.33	692.833	-115.513	645.59	792.428	-75.205	661.14	804.378	1.32168	567.756	808.62	-12.681	476.338	781.862	10.963	854.777	707.69	519.792	619.812	796.135	513.652	634.118	798.095	430.252	544.699	823.12	459.457	443.612	782.617	434.278
171	1.7	769.436	1247.27	196.287	809.675	1237.88	121.612	829.297	1238.58	261.888	919.486	1058.63	25.0439	917.955	1082.04	361.471	840.724	1038.38	199.026	861.303	692.86	-115.49	645.61	792.438	-75.1973	661.153	804.373	1.35068	567.793	808.606	-12.6488	476.333	781.856	11.0097	854.755	707.683	519.788	619.809	796.148	513.669	634.068	798.118	430.262	544.709	823.151	459.489	443.62	782.616	434.291
172	1.71	769.453	1247.26	196.307	809.699	1237.89	121.631	829.312	1238.59	261.905	919.49	1058.64	25.0199	917.949	1082.03	361.462	840.721	1038.38	199.023	861.307	692.86	-115.47	645.615	792.41	-75.2105	661.118	804.365	1.34434	567.756	808.563	-12.6395	476.313	781.843	10.9948	854.726	707.677	519.765	619.765	796.142	513.638	634.063	798.124	430.243	544.727	823.143	459.472	443.611	782.614	434.271
173	1.72	769.471	1247.26	196.32	809.745	1237.9	121.623	829.332	1238.54	261.897	919.525	1058.64	25.0119	917.951	1082.01	361.444	840.752	1038.37	199.004	861.351	692.849	-115.483	645.64	792.389	-75.2249	661.118	804.364	1.33141	567.724	808.566	-12.6576	476.348	781.821	10.9524	854.71	707.648	519.754	619.747	796.119	513.624	634.071	798.118	430.245	544.711	823.121	459.46	443.616	782.61	434.274
174	1.73	769.531	1247.26	196.358	809.783	1237.9	121.67	829.407	1238.53	261.932	919.571	1058.64	25.0284	917.962	1081.98	361.445	840.87	1038.37	199.009	861.367	692.842	-115.477	645.662	792.395	-75.2219	661.16	804.367	1.34388	567.761	808.561	-12.6651	476.389	781.817	10.962	854.745	707.641	519.764	619.806	796.109	513.648	634.115	798.107	430.278	544.733	823.108	459.473	443.639	782.616	434.291
175	1.74	769.545	1247.29	196.451	809.802	1237.9	121.764	829.469	1238.53	261.973	919.608	1058.62	25.0455	918.026	1081.99	361.466	840.944	1038.36	199.046	861.333	692.871	-115.459	645.663	792.416	-75.1896	661.156	804.371	1.37828	567.783	808.572	-12.624	476.418	781.815	10.9846	854.798	707.62	519.769	619.868	796.113	513.671	634.156	798.091	430.282	544.79	823.119	459.485	443.638	782.634	434.315
176	1.75	769.582	1247.3	196.493	809.744	1237.93	121.805	829.551	1238.52	262.006	919.636	1058.62	25.039	918.075	1082	361.457	840.827	1038.41	199.067	861.275	692.906	-115.447	645.62	792.453	-75.1909	661.108	804.386	1.36962	567.736	808.611	-12.6059	476.371	781.857	10.9956	854.812	707.599	519.76	619.862	796.113	513.649	634.163	798.091	430.278	544.83	823.135	459.494	443.612	782.646	434.322
177	1.76	769.537	1247.32	196.518	809.711	1237.94	121.824	829.567	1238.51	262.036	919.644	1058.61	25.0289	918.088	1081.99	361.444	840.76	1038.44	199.041	861.274	692.88	-115.444	645.595	792.461	-75.2072	661.088	804.393	1.34441	567.706	808.629	-12.6246	476.328	781.87	11.0029	854.845	707.617	519.764	619.821	796.109	513.64	634.155	798.068	430.281	544.815	823.138	459.495	443.589	782.636	434.3
178	1.77	769.56	1247.31	196.501	809.765	1237.94	121.818	829.557	1238.48	262.05	919.675	1058.6	25.0244	918.136	1081.96	361.437	840.819	1038.4	199	861.322	692.829	-115.476	645.609	792.426	-75.2354	661.131	804.394	1.31469	567.714	808.635	-12.6584	476.352	781.856	10.9668	854.877	707.609	519.753	619.819	796.111	513.626	634.17	798.041	430.266	544.793	823.126	459.462	443.609	782.608	434.259
179	1.78	769.69	1247.28	196.504	809.842	1237.93	121.824	829.656	1238.51	262.084	919.691	1058.59	25.0171	918.141	1081.95	361.428	840.92	1038.34	199.015	861.353	692.813	-115.491	645.678	792.396	-75.2516	661.18	804.376	1.28722	567.765	808.599	-12.6788	476.406	781.853	10.9439	854.866	707.596	519.75	619.859	796.125	513.617	634.174	798.038	430.238	544.817	823.121	459.451	443.643	782.593	434.25
180	1.79	769.78	1247.26	196.535	809.829	1237.94	121.863	829.642	1238.52	262.111	919.653	1058.59	24.9961	918.119	1081.95	361.421	840.855	1038.37	199.017	861.327	692.828	-115.496	645.664	792.406	-75.2517	661.172	804.371	1.25959	567.742	808.596	-12.7108	476.404	781.868	10.9337	854.812	707.593	519.731	619.844	796.131	513.614	634.135	798.053	430.228	544.786	823.13	459.449	443.631	782.605	434.255
181	1.8	769.735	1247.28	196.575	809.746	1237.96	121.924	829.6	1238.51	262.117	919.606	1058.61	24.9984	918.089	1081.96	361.436	840.791	1038.42	199.003	861.289	692.862	-115.494	645.591	792.434	-75.2292	661.126	804.389	1.28819	567.73	808.614	-12.6993	476.338	781.862	10.9391	854.759	707.614	519.722	619.813	796.151	513.641	634.108	798.08	430.251	544.735	823.141	459.464	443.578	782.623	434.268
182	1.81	769.781	1247.28	196.605	809.73	1237.95	121.955	829.625	1238.52	262.143	919.614	1058.61	25.0065	918.116	1081.98	361.446	840.87	1038.42	199.013	861.307	692.885	-115.484	645.618	792.435	-75.2149	661.146	804.396	1.30417	567.746	808.632	-12.6917	476.324	781.871	10.9465	854.7	707.592	519.71	619.789	796.152	513.645	634.092	798.107	430.262	544.709	823.152	459.458	443.576	782.633	434.283
183	1.82	769.867	1247.23	196.643	809.77	1237.92	121.97	829.671	1238.52	262.168	919.632	1058.61	25.0196	918.164	1082	361.451	840.928	1038.4	199.063	861.295	692.892	-115.476	645.663	792.44	-75.2	661.159	804.392	1.32891	567.785	808.622	-12.6638	476.354	781.869	10.9649	854.721	707.586	519.727	619.788	796.142	513.637	634.083	798.139	430.243	544.724	823.149	459.473	443.597	782.632	434.297
184	1.83	769.838	1247.2	196.662	809.716	1237.93	121.988	829.667	1238.52	262.158	919.627	1058.62	25.0315	918.14	1081.99	361.456	840.895	1038.39	199.069	861.247	692.897	-115.473	645.633	792.446	-75.2002	661.124	804.377	1.34564	567.747	808.61	-12.6395	476.353	781.873	10.972	854.695	707.575	519.73	619.795	796.139	513.639	634.042	798.149	430.233	544.735	823.151	459.48	443.599	782.646	434.299
185	1.84	769.768	1247.2	196.635	809.681	1237.92	121.983	829.672	1238.52	262.151	919.606	1058.61	25.0397	918.137	1081.99	361.485	840.89	1038.37	199.074	861.253	692.902	-115.466	645.622	792.441	-75.2057	661.088	804.38	1.35501	567.696	808.599	-12.6244	476.323	781.854	10.9969	854.672	707.531	519.716	619.788	796.129	513.662	634.078	798.14	430.249	544.733	823.144	459.492	443.597	782.647	434.308
186	1.85	769.784	1247.21	196.604	809.753	1237.9	121.937	829.646	1238.5	262.122	919.613	1058.59	25.0391	918.145	1081.95	361.475	840.892	1038.35	199.069	861.313	692.877	-115.465	645.651	792.427	-75.2288	661.13	804.361	1.32955	567.754	808.596	-12.645	476.329	781.826	10.9925	854.731	707.526	519.712	619.791	796.125	513.662	634.135	798.093	430.253	544.78	823.117	459.484	443.63	782.627	434.305
187	1.86	769.847	1247.2	196.576	809.819	1237.89	121.89	829.648	1238.49	262.106	919.639	1058.58	25.0385	918.172	1081.92	361.425	840.988	1038.33	199.06	861.348	692.833	-115.492	645.665	792.413	-75.2324	661.164	804.342	1.32207	567.821	808.599	-12.6737	476.376	781.82	10.9811	854.815	707.572	519.744	619.868	796.132	513.668	634.154	798.056	430.244	544.833	823.115	459.488	443.69	782.608	434.3
188	1.87	769.741	1247.26	196.537	809.814	1237.89	121.819	829.6	1238.49	262.052	919.635	1058.58	25.0136	918.156	1081.93	361.42	840.914	1038.35	199.047	861.336	692.814	-115.503	645.64	792.419	-75.2395	661.143	804.352	1.30441	567.788	808.592	-12.682	476.367	781.831	10.9638	854.864	707.602	519.754	619.907	796.125	513.65	634.189	798.043	430.257	544.803	823.12	459.463	443.657	782.629	434.291
189	1.88	769.668	1247.28	196.497	809.78	1237.91	121.781	829.534	1238.49	262.014	919.641	1058.58	25.003	918.11	1081.95	361.415	840.788	1038.4	199.004	861.31	692.846	-115.488	645.613	792.432	-75.2477	661.133	804.375	1.2846	567.726	808.629	-12.6829	476.337	781.866	10.9489	854.841	707.582	519.738	619.893	796.111	513.63	634.244	798.066	430.282	544.781	823.126	459.451	443.611	782.657	434.297
190	1.89	769.569	1247.3	196.496	809.774	1237.91	121.767	829.525	1238.48	261.993	919.655	1058.59	25.0142	918.104	1081.95	361.418	840.774	1038.41	199.006	861.297	692.856	-115.467	645.63	792.426	-75.2305	661.113	804.385	1.29986	567.707	808.644	-12.6651	476.345	781.859	10.9509	854.871	707.582	519.745	619.9	796.11	513.632	634.231	798.074	430.283	544.8	823.117	459.472	443.619	782.651	434.304
191	1.9	769.555	1247.31	196.486	809.745	1237.91	121.78	829.545	1238.46	261.999	919.664	1058.61	25.0165	918.107	1081.96	361.452	840.819	1038.41	199.053	861.328	692.849	-115.466	645.679	792.418	-75.2099	661.128	804.379	1.34648	567.749	808.635	-12.6361	476.401	781.861	10.946	854.916	707.603	519.755	619.926	796.129	513.658	634.182	798.078	430.27	544.876	823.131	459.506	443.631	782.649	434.313
192	1.91	769.489	1247.32	196.451	809.748	1237.91	121.742	829.499	1238.49	261.99	919.632	1058.62	25.006	918.103	1081.95	361.44	840.778	1038.42	199.012	861.34	692.834	-115.489	645.673	792.414	-75.2167	661.136	804.378	1.32896	567.79	808.628	-12.6452	476.403	781.864	10.9492	854.867	707.605	519.748	619.906	796.149	513.667	634.135	798.088	430.266	544.867	823.137	459.513	443.633	782.638	434.303
193	1.92	769.416	1247.31	196.396	809.72	1237.9	121.683	829.446	1238.5	261.948	919.562	1058.61	24.9914	918.034	1081.95	361.409	840.771	1038.41	198.958	861.381	692.797	-115.517	645.642	792.416	-75.2512	661.132	804.378	1.29148	567.781	808.6	-12.6666	476.408	781.851	10.9209	854.786	707.582	519.734	619.866	796.151	513.66	634.12	798.096	430.264	544.795	823.144	459.478	443.629	782.631	434.275
194	1.93	769.55	1247.26	196.352	809.716	1237.9	121.684	829.426	1238.5	261.915	919.559	1058.62	24.9839	918.004	1081.95	361.403	840.793	1038.4	198.959	861.4	692.808	-115.509	645.657	792.411	-75.2548	661.126	804.385	1.30117	567.782	808.607	-12.6853	476.402	781.832	10.9316	854.791	707.603	519.745	619.845	796.157	513.645	634.106	798.122	430.247	544.772	823.141	459.468	443.625	782.626	434.279
195	1.94	769.651	1247.23	196.371	809.7	1237.9	121.7	829.445	1238.52	261.931	919.566	1058.62	24.9929	917.98	1081.98	361.409	840.806	1038.36	199.009	861.372	692.822	-115.489	645.655	792.416	-75.214	661.125	804.397	1.322	567.769	808.625	-12.6469	476.357	781.857	10.9771	854.794	707.637	519.757	619.842	796.165	513.653	634.081	798.135	430.242	544.758	823.152	459.482	443.623	782.635	434.321
196	1.95	769.608	1247.19	196.357	809.686	1237.86	121.686	829.39	1238.5	261.92	919.541	1058.59	24.9927	917.934	1081.96	361.392	840.823	1038.34	199.011	861.336	692.809	-115.477	645.616	792.406	-75.2163	661.134	804.391	1.32335	567.738	808.625	-12.6366	476.324	781.857	10.9891	854.729	707.625	519.753	619.803	796.145	513.646	634.067	798.124	430.241	544.741	823.16	459.497	443.613	782.628	434.319
197	1.96	769.492	1247.17	196.366	809.69	1237.82	121.655	829.384	1238.49	261.918	919.544	1058.57	24.9759	917.916	1081.93	361.378	840.817	1038.32	198.967	861.327	692.799	-115.512	645.611	792.396	-75.2438	661.134	804.365	1.29624	567.754	808.595	-12.6568	476.332	781.831	10.9581	854.681	707.588	519.755	619.79	796.116	513.64	634.119	798.088	430.24	544.743	823.128	459.477	443.601	782.602	434.296
198	1.97	769.505	1247.15	196.373	809.754	1237.79	121.619	829.411	1238.48	261.902	919.565	1058.54	24.9568	917.948	1081.91	361.364	840.92	1038.25	198.956	861.405	692.749	-115.535	645.664	792.365	-75.2591	661.177	804.323	1.29658	567.795	808.533	-12.6866	476.368	781.79	10.9429	854.718	707.581	519.767	619.819	796.089	513.656	634.149	798.036	430.229	544.759	823.074	459.468	443.632	782.557	434.297
199	1.98	769.547	1247.11	196.341	809.758	1237.78	121.605	829.422	1238.45	261.892	919.577	1058.53	24.9518	917.978	1081.91	361.361	840.987	1038.24	198.962	861.392	692.729	-115.528	645.685	792.353	-75.2566	661.193	804.327	1.31452	567.815	808.526	-12.6752	476.38	781.797	10.9639	854.769	707.574	519.768	619.853	796.093	513.662	634.149	798.009	430.222	544.8	823.057	459.48	443.667	782.545	434.298
200	1.99	769.613	1247.12	196.288	809.681	1237.8	121.602	829.397	1238.47	261.889	919.573	1058.53	24.9509	917.972	1081.94	361.357	840.912	1038.3	198.951	861.368	692.741	-115.514	645.639	792.388	-75.2584	661.15	804.361	1.29893	567.796	808.568	-12.6589	476.362	781.834	10.9727	854.744	707.581	519.756	619.827	796.117	513.653	634.171	798.023	430.244	544.791	823.089	459.469	443.666	782.574	434.3
201	2	769.475	1247.21	196.271	809.579	1237.85	121.596	829.341	1238.47	261.849	919.535	1058.56	24.9536	917.932	1081.99	361.346	840.73	1038.4	198.934	861.328	692.792	-115.497	645.565	792.439	-75.2635	661.083	804.412	1.28046	567.746	808.631	-12.6629	476.369	781.882	10.9406	854.729	707.593	519.728	619.816	796.14	513.63	634.166	798.069	430.264	544.779	823.154	459.452	443.606	782.629	434.304
202	2.01	769.411	1247.26	196.252	809.545	1237.91	121.592	829.341	1238.5	261.815	919.525	1058.59	24.9489	917.909	1082.05	361.349	840.653	1038.48	198.943	861.277	692.822	-115.464	645.552	792.471	-75.246	661.08	804.452	1.30156	567.685	808.678	-12.6418	476.352	781.901	10.975	854.786	707.646	519.738	619.867	796.171	513.624	634.16	798.123	430.278	544.822	823.2	459.464	443.6	782.682	434.316
203	2.02	769.307	1247.32	196.256	809.524	1237.92	121.537	829.325	1238.53	261.806	919.505	1058.61	24.9412	917.895	1082.08	361.346	840.638	1038.51	198.922	861.288	692.835	-115.473	645.582	792.485	-75.2308	661.096	804.475	1.29238	567.698	808.711	-12.6706	476.356	781.941	10.9815	854.794	707.68	519.738	619.883	796.197	513.628	634.128	798.169	430.276	544.847	823.218	459.471	443.608	782.695	434.322
204	2.03	769.327	1247.29	196.217	809.516	1237.89	121.519	829.269	1238.53	261.793	919.462	1058.6	24.9368	917.876	1082.06	361.354	840.641	1038.48	198.907	861.306	692.83	-115.494	645.613	792.461	-75.2527	661.099	804.458	1.2672	567.72	808.7	-12.6765	476.307	781.924	10.9976	854.757	707.667	519.716	619.821	796.192	513.626	634.088	798.184	430.263	544.805	823.214	459.472	443.612	782.678	434.308
205	2.04	769.365	1247.23	196.198	809.542	1237.84	121.507	829.24	1238.51	261.79	919.443	1058.58	24.9213	917.889	1082.03	361.352	840.653	1038.42	198.908	861.311	692.772	-115.505	645.601	792.435	-75.2696	661.114	804.422	1.27107	567.691	808.663	-12.6735	476.282	781.895	11.0088	854.764	707.652	519.709	619.802	796.174	513.628	634.082	798.148	430.26	544.78	823.184	459.476	443.615	782.65	434.297
206	2.05	769.432	1247.15	196.211	809.594	1237.78	121.472	829.287	1238.49	261.783	919.448	1058.53	24.9173	917.912	1082	361.332	840.756	1038.32	198.907	861.316	692.695	-115.52	645.653	792.374	-75.2773	661.151	804.357	1.28228	567.715	808.607	-12.6704	476.362	781.837	10.9851	854.774	707.633	519.729	619.832	796.138	513.635	634.088	798.087	430.23	544.772	823.109	459.48	443.639	782.589	434.294
207	2.06	769.499	1247.09	196.164	809.65	1237.73	121.411	829.315	1238.48	261.767	919.465	1058.49	24.8997	917.92	1081.96	361.317	840.851	1038.23	198.884	861.36	692.632	-115.546	645.68	792.321	-75.3068	661.171	804.302	1.27297	567.784	808.546	-12.698	476.419	781.788	10.9587	854.781	707.589	519.733	619.86	796.107	513.639	634.12	798.028	430.2	544.762	823.024	459.454	443.639	782.537	434.272
208	2.07	769.504	1247.09	196.147	809.633	1237.69	121.396	829.314	1238.48	261.771	919.465	1058.47	24.902	917.932	1081.94	361.308	840.856	1038.23	198.902	861.345	692.605	-115.547	645.667	792.312	-75.2903	661.164	804.297	1.26201	567.772	808.517	-12.7171	476.415	781.771	10.9635	854.806	707.578	519.735	619.878	796.099	513.646	634.16	797.992	430.216	544.781	823.013	459.458	443.636	782.515	434.285
209	2.08	769.31	1247.19	196.19	809.506	1237.73	121.435	829.274	1238.48	261.777	919.459	1058.49	24.9411	917.924	1081.98	361.317	840.744	1038.32	198.927	861.296	692.652	-115.507	645.61	792.345	-75.2435	661.096	804.331	1.30134	567.719	808.537	-12.6897	476.364	781.807	11.0023	854.812	707.608	519.74	619.915	796.108	513.651	634.189	798.011	430.265	544.797	823.057	459.49	443.588	782.558	434.313
210	2.09	769.284	1247.23	196.141	809.484	1237.8	121.441	829.219	1238.49	261.748	919.467	1058.53	24.9425	917.922	1082.02	361.331	840.664	1038.43	198.933	861.308	692.687	-115.463	645.565	792.4	-75.2222	661.077	804.369	1.3173	567.736	808.602	-12.6663	476.342	781.845	11.0336	854.827	707.643	519.753	619.907	796.113	513.648	634.192	798.051	430.293	544.812	823.109	459.504	443.591	782.616	434.325
211	2.1	769.224	1247.29	196.062	809.552	1237.83	121.372	829.189	1238.49	261.696	919.449	1058.55	24.9037	917.937	1082.04	361.315	840.6	1038.49	198.869	861.354	692.748	-115.466	645.602	792.446	-75.2506	661.104	804.428	1.27303	567.746	808.643	-12.6944	476.351	781.878	10.9737	854.848	707.693	519.757	619.876	796.129	513.622	634.236	798.107	430.298	544.804	823.16	459.469	443.593	782.662	434.299
212	2.11	769.2	1247.34	196.062	809.586	1237.85	121.354	829.189	1238.49	261.693	919.443	1058.59	24.8915	917.926	1082.05	361.286	840.543	1038.54	198.85	861.349	692.82	-115.486	645.617	792.464	-75.2686	661.106	804.466	1.27298	567.745	808.649	-12.6753	476.391	781.891	10.9571	854.811	707.699	519.746	619.864	796.15	513.626	634.228	798.148	430.288	544.779	823.186	459.453	443.606	782.689	434.289
213	2.12	769.202	1247.38	196.108	809.539	1237.88	121.406	829.203	1238.51	261.728	919.427	1058.61	24.9091	917.887	1082.06	361.298	840.507	1038.59	198.9	861.307	692.849	-115.451	645.586	792.48	-75.2289	661.071	804.48	1.32678	567.713	808.688	-12.6254	476.368	781.9	11.0086	854.788	707.692	519.743	619.852	796.152	513.636	634.198	798.185	430.303	544.765	823.218	459.484	443.594	782.716	434.332
214	2.13	769.175	1247.39	196.146	809.505	1237.9	121.454	829.258	1238.55	261.771	919.424	1058.61	24.9327	917.872	1082.07	361.325	840.57	1038.56	198.94	861.31	692.843	-115.444	645.586	792.475	-75.2064	661.093	804.467	1.34688	567.714	808.671	-12.5998	476.348	781.904	11.0347	854.787	707.69	519.765	619.839	796.148	513.652	634.163	798.174	430.305	544.764	823.214	459.503	443.603	782.695	434.347
215	2.14	769.305	1247.3	196.095	809.585	1237.86	121.404	829.244	1238.55	261.744	919.42	1058.58	24.8999	917.855	1082.03	361.29	840.736	1038.45	198.875	861.321	692.776	-115.504	645.627	792.4	-75.249	661.148	804.399	1.28716	567.768	808.611	-12.6495	476.355	781.845	10.9966	854.77	707.684	519.767	619.812	796.135	513.64	634.107	798.114	430.245	544.775	823.147	459.473	443.616	782.632	434.313
216	2.15	769.432	1247.16	196.034	809.662	1237.79	121.324	829.231	1238.54	261.708	919.416	1058.52	24.8414	917.848	1081.97	361.236	840.896	1038.32	198.806	861.363	692.659	-115.593	645.693	792.316	-75.3179	661.206	804.326	1.2022	567.805	808.543	-12.7125	476.383	781.781	10.9252	854.752	707.679	519.753	619.808	796.129	513.612	634.068	798.033	430.176	544.749	823.08	459.429	443.617	782.559	434.249
217	2.16	769.447	1247.17	196.013	809.659	1237.75	121.297	829.256	1238.52	261.704	919.43	1058.5	24.817	917.881	1081.95	361.216	840.908	1038.28	198.765	861.345	692.598	-115.605	645.699	792.284	-75.3512	661.211	804.288	1.17226	567.775	808.524	-12.7595	476.377	781.793	10.8809	854.761	707.684	519.732	619.832	796.156	513.61	634.043	797.97	430.15	544.724	823.067	459.385	443.598	782.519	434.215
218	2.17	769.411	1247.24	196.038	809.648	1237.78	121.34	829.308	1238.5	261.714	919.432	1058.49	24.8421	917.877	1081.95	361.254	840.853	1038.33	198.772	861.335	692.616	-115.569	645.655	792.33	-75.3173	661.15	804.312	1.21421	567.74	808.556	-12.7381	476.35	781.818	10.9192	854.806	707.696	519.738	619.854	796.154	513.617	634.082	797.968	430.187	544.729	823.068	459.396	443.582	782.544	434.231
219	2.18	769.406	1247.29	196.091	809.636	1237.85	121.397	829.319	1238.5	261.723	919.488	1058.53	24.8767	917.902	1082	361.284	840.737	1038.49	198.825	861.32	692.713	-115.518	645.604	792.406	-75.2628	661.11	804.374	1.27438	567.724	808.604	-12.682	476.312	781.856	10.9811	854.832	707.7	519.749	619.874	796.133	513.632	634.048	798.144	430.102	544.781	823.094	459.439	443.599	782.613	434.279
220	2.19	769.391	1247.32	196.174	809.599	1237.91	121.453	829.362	1238.49	261.737	919.559	1058.56	24.9158	917.913	1082.03	361.307	840.659	1038.58	198.906	861.302	692.813	-115.484	645.586	792.462	-75.2075	661.1	804.427	1.3267	567.716	808.669	-12.6192	476.303	781.897	11.0282	854.814	707.642	519.75	619.883	796.119	513.631	633.93	798.362	429.953	544.819	823.12	459.489	443.624	782.67	434.332
221	2.2	769.46	1247.31	196.173	809.572	1237.95	121.477	829.363	1238.48	261.735	919.56	1058.56	24.9264	917.925	1082.04	361.308	840.618	1038.61	198.925	861.288	692.851	-115.448	645.587	792.479	-75.2003	661.088	804.458	1.34628	567.696	808.697	-12.5877	476.29	781.924	11.0314	854.782	707.594	519.737	619.879	796.097	513.628	634.219	798.201	430.268	544.856	823.14	459.513	443.606	782.701	434.371
222	2.21	769.504	1247.29	196.151	809.624	1237.93	121.461	829.373	1238.48	261.734	919.552	1058.55	24.938	917.93	1082.04	361.306	840.7	1038.57	198.93	861.285	692.836	-115.449	645.593	792.472	-75.2029	661.091	804.449	1.34415	567.67	808.667	-12.6065	476.298	781.915	11.0419	854.801	707.628	519.753	619.859	796.096	513.642	634.269	798.147	430.326	544.854	823.137	459.511	443.626	782.695	434.364
223	2.22	769.581	1247.25	196.093	809.689	1237.91	121.414	829.374	1238.5	261.727	919.527	1058.54	24.917	917.917	1082.03	361.271	840.753	1038.53	198.884	861.317	692.762	-115.485	645.613	792.423	-75.2287	661.116	804.421	1.3214	567.706	808.636	-12.6201	476.326	781.879	11.0124	854.782	707.652	519.746	619.827	796.114	513.637	634.201	798.123	430.293	544.812	823.13	459.487	443.637	782.671	434.329
224	2.23	769.506	1247.28	196.089	809.736	1237.88	121.391	829.365	1238.54	261.716	919.507	1058.52	24.8893	917.907	1082.02	361.251	840.779	1038.47	198.846	861.348	692.673	-115.517	645.65	792.383	-75.2622	661.123	804.369	1.28877	567.775	808.616	-12.6631	476.36	781.836	10.9647	854.8	707.7	519.75	619.819	796.147	513.642	634.121	798.082	430.247	544.747	823.125	459.455	443.64	782.621	434.292
225	2.24	769.469	1247.3	196.097	809.771	1237.81	121.32	829.357	1238.56	261.696	919.492	1058.46	24.8636	917.905	1082.01	361.237	840.808	1038.33	198.812	861.354	692.576	-115.551	645.652	792.35	-75.2931	661.136	804.33	1.23569	567.799	808.577	-12.7514	476.401	781.801	10.9261	854.789	707.737	519.751	619.817	796.16	513.638	634.061	798.043	430.2	544.737	823.108	459.423	443.615	782.565	434.245
226	2.25	769.626	1247.24	196.041	809.805	1237.78	121.278	829.366	1238.57	261.694	919.499	1058.43	24.8603	917.93	1081.99	361.225	840.874	1038.28	198.8	861.369	692.534	-115.568	645.662	792.32	-75.3161	661.165	804.302	1.20457	567.833	808.525	-12.7636	476.419	781.783	10.8879	854.779	707.752	519.759	619.823	796.164	513.631	634.011	798.025	430.176	544.742	823.092	459.41	443.616	782.533	434.235
227	2.26	769.625	1247.26	196.003	809.829	1237.81	121.275	829.347	1238.59	261.681	919.491	1058.43	24.8617	917.947	1082	361.235	840.807	1038.32	198.804	861.375	692.551	-115.549	645.653	792.32	-75.3205	661.156	804.303	1.20759	567.811	808.54	-12.753	476.393	781.791	10.8791	854.812	707.775	519.772	619.823	796.172	513.62	634.011	798.023	430.188	544.718	823.092	459.409	443.632	782.544	434.241
228	2.27	769.582	1247.32	195.997	809.793	1237.85	121.304	829.344	1238.6	261.674	919.484	1058.44	24.8722	917.966	1082.04	361.259	840.739	1038.36	198.816	861.375	692.599	-115.528	645.635	792.348	-75.3045	661.146	804.333	1.22881	567.773	808.591	-12.7545	476.383	781.81	10.9016	854.809	707.769	519.77	619.82	796.164	513.625	634.069	798.059	430.223	544.735	823.122	459.432	443.63	782.581	434.256
229	2.28	769.541	1247.41	196.022	809.783	1237.88	121.324	829.381	1238.61	261.689	919.513	1058.47	24.9084	917.976	1082.09	361.277	840.682	1038.44	198.852	861.372	692.665	-115.496	645.624	792.402	-75.2678	661.12	804.391	1.266	567.749	808.635	-12.6964	476.39	781.866	10.9424	854.782	707.72	519.756	619.827	796.149	513.641	634.19	798.092	430.285	544.789	823.16	459.466	443.64	782.631	434.295
230	2.29	769.558	1247.43	196.057	809.777	1237.92	121.374	829.418	1238.63	261.707	919.542	1058.52	24.9693	918.006	1082.12	361.35	840.648	1038.52	198.933	861.375	692.766	-115.453	645.63	792.449	-75.2143	661.093	804.435	1.33564	567.732	808.675	-12.6363	476.353	781.898	11.0004	854.786	707.708	519.775	619.856	796.154	513.653	634.253	798.121	430.32	544.804	823.201	459.508	443.625	782.694	434.36
231	2.3	769.563	1247.42	196.056	809.777	1237.93	121.401	829.427	1238.63	261.71	919.554	1058.55	24.9819	918.041	1082.13	361.391	840.672	1038.54	198.999	861.355	692.81	-115.442	645.618	792.47	-75.173	661.112	804.441	1.3631	567.749	808.684	-12.5935	476.336	781.932	11.0296	854.791	707.716	519.786	619.851	796.152	513.65	634.23	798.141	430.324	544.817	823.21	459.531	443.618	782.716	434.367
232	2.31	769.47	1247.45	196.047	809.844	1237.93	121.373	829.416	1238.63	261.683	919.546	1058.55	24.9611	918.021	1082.09	361.37	840.638	1038.55	198.98	861.345	692.809	-115.449	645.621	792.463	-75.1876	661.131	804.434	1.34877	567.759	808.663	-12.5929	476.338	781.923	11.004	854.789	707.708	519.78	619.818	796.144	513.65	634.221	798.144	430.325	544.801	823.18	459.52	443.604	782.695	434.341
233	2.32	769.486	1247.44	195.992	809.913	1237.91	121.33	829.382	1238.62	261.663	919.544	1058.55	24.9279	917.99	1082.06	361.347	840.69	1038.5	198.938	861.325	692.784	-115.475	645.639	792.433	-75.2261	661.137	804.399	1.3206	567.754	808.625	-12.6673	476.331	781.891	10.9779	854.757	707.707	519.762	619.802	796.141	513.64	634.163	798.112	430.287	544.763	823.143	459.491	443.586	782.641	434.305
234	2.33	769.677	1247.37	195.982	809.961	1237.88	121.31	829.403	1238.63	261.67	919.576	1058.54	24.9113	917.985	1082.03	361.333	840.785	1038.43	198.9	861.3	692.714	-115.487	645.653	792.388	-75.2397	661.15	804.339	1.31201	567.721	808.593	-12.6634	476.347	781.849	10.9762	854.787	707.716	519.754	619.827	796.151	513.65	634.06	798.055	430.235	544.748	823.12	459.465	443.599	782.586	434.276
235	2.34	769.75	1247.34	195.99	810.026	1237.86	121.296	829.471	1238.62	261.702	919.6	1058.51	24.9072	917.987	1081.97	361.296	840.881	1038.35	198.853	861.332	692.643	-115.508	645.668	792.342	-75.2615	661.176	804.296	1.29657	567.774	808.55	-12.6681	476.366	781.804	10.9589	854.827	707.71	519.748	619.825	796.151	513.641	633.994	797.992	430.19	544.734	823.084	459.432	443.622	782.55	434.262
236	2.35	769.841	1247.31	195.962	810.118	1237.86	121.28	829.492	1238.62	261.716	919.617	1058.51	24.8786	918.024	1081.95	361.262	840.937	1038.3	198.807	861.349	692.632	-115.544	645.688	792.307	-75.2978	661.21	804.273	1.24287	567.81	808.509	-12.7113	476.393	781.77	10.9154	854.815	707.687	519.742	619.78	796.127	513.617	634.021	797.983	430.167	544.733	823.052	459.412	443.644	782.522	434.237
237	2.36	769.866	1247.37	195.986	810.111	1237.88	121.317	829.52	1238.62	261.732	919.616	1058.52	24.8763	918.043	1081.96	361.28	840.938	1038.34	198.825	861.372	692.683	-115.544	645.69	792.351	-75.2787	661.194	804.297	1.23457	567.819	808.524	-12.7128	476.405	781.779	10.8971	854.801	707.664	519.732	619.797	796.131	513.618	634.092	798.015	430.2	544.765	823.07	459.415	443.64	782.543	434.24
238	2.37	769.829	1247.46	196.108	810.04	1237.96	121.416	829.629	1238.63	261.791	919.643	1058.57	24.9191	918.047	1082	361.331	840.829	1038.47	198.892	861.383	692.772	-115.479	645.653	792.425	-75.2299	661.15	804.378	1.3008	567.765	808.619	-12.6551	476.385	781.843	10.9643	854.81	707.649	519.732	619.843	796.139	513.626	634.178	798.063	430.26	544.809	823.135	459.472	443.634	782.613	434.304
239	2.38	769.682	1247.6	196.186	810	1238.05	121.487	829.652	1238.63	261.802	919.65	1058.61	24.9411	918.074	1082.05	361.351	840.687	1038.61	198.923	861.341	692.861	-115.423	645.616	792.485	-75.1905	661.103	804.459	1.34172	567.742	808.696	-12.6279	476.326	781.923	11.0045	854.843	707.652	519.731	619.873	796.149	513.622	634.247	798.132	430.325	544.845	823.206	459.512	443.6	782.702	434.356
240	2.39	769.619	1247.68	196.197	810	1238.1	121.503	829.615	1238.62	261.779	919.653	1058.62	24.9376	918.083	1082.05	361.339	840.611	1038.69	198.895	861.318	692.9	-115.411	645.582	792.518	-75.1888	661.096	804.487	1.32025	567.741	808.726	-12.6562	476.318	781.973	10.9777	854.835	707.649	519.713	619.887	796.156	513.606	634.256	798.155	430.338	544.838	823.236	459.494	443.569	782.747	434.333
241	2.4	769.685	1247.67	196.184	810.024	1238.09	121.492	829.664	1238.63	261.799	919.642	1058.59	24.9064	918.115	1082.05	361.31	840.631	1038.67	198.872	861.321	692.859	-115.442	645.595	792.515	-75.2152	661.125	804.466	1.2752	567.686	808.735	-12.6728	476.346	781.957	10.9393	854.851	707.661	519.715	619.881	796.16	513.583	634.238	798.14	430.297	544.808	823.223	459.45	443.595	782.74	434.302
242	2.41	769.894	1247.57	196.228	810.071	1238.06	121.504	829.718	1238.63	261.847	919.666	1058.55	24.9047	918.115	1081.99	361.301	840.81	1038.53	198.878	861.334	692.807	-115.488	645.642	792.454	-75.237	661.127	804.408	1.27991	567.717	808.67	-12.697	476.403	781.875	10.9335	854.833	707.642	519.726	619.863	796.153	513.6	634.186	798.099	430.257	544.806	823.169	459.452	443.617	782.673	434.282
243	2.42	770.038	1247.45	196.273	810.139	1237.99	121.569	829.739	1238.62	261.881	919.686	1058.53	24.9194	918.085	1081.93	361.304	840.97	1038.37	198.895	861.356	692.742	-115.498	645.684	792.396	-75.2409	661.152	804.339	1.28982	567.818	808.572	-12.6954	476.416	781.813	10.9378	854.769	707.608	519.716	619.834	796.135	513.629	634.14	798.063	430.22	544.801	823.111	459.465	443.65	782.604	434.282
244	2.43	770.053	1247.4	196.315	810.149	1237.94	121.603	829.751	1238.62	261.911	919.66	1058.51	24.9201	918.104	1081.91	361.306	841.06	1038.28	198.927	861.359	692.693	-115.53	645.732	792.338	-75.2659	661.179	804.294	1.28601	567.849	808.508	-12.695	476.414	781.786	10.9328	854.689	707.58	519.711	619.793	796.13	513.634	634.077	798.046	430.184	544.747	823.073	459.465	443.671	782.559	434.278
245	2.44	770.115	1247.35	196.322	810.13	1237.94	121.618	829.742	1238.62	261.939	919.647	1058.49	24.9185	918.086	1081.9	361.303	841.095	1038.24	198.922	861.333	692.666	-115.533	645.741	792.323	-75.2746	661.17	804.282	1.28169	567.823	808.508	-12.6633	476.399	781.769	10.9237	854.67	707.572	519.709	619.77	796.132	513.623	634.021	798.029	430.175	544.707	823.055	459.462	443.66	782.534	434.277
246	2.45	770.114	1247.36	196.324	810.136	1237.96	121.648	829.788	1238.61	261.966	919.646	1058.5	24.9318	918.092	1081.91	361.31	841.049	1038.29	198.926	861.321	692.664	-115.506	645.707	792.349	-75.2457	661.165	804.303	1.29527	567.818	808.545	-12.6658	476.386	781.796	10.9322	854.744	707.616	519.718	619.793	796.138	513.631	634.017	798.04	430.195	544.738	823.082	459.468	443.65	782.552	434.294
247	2.46	770.1	1247.41	196.325	810.09	1237.98	121.655	829.792	1238.62	261.951	919.645	1058.54	24.952	918.119	1081.93	361.332	840.938	1038.4	198.922	861.314	692.714	-115.482	645.658	792.397	-75.2242	661.136	804.346	1.30998	567.773	808.604	-12.661	476.372	781.831	10.9637	854.779	707.632	519.706	619.816	796.15	513.634	634.066	798.059	430.224	544.764	823.143	459.47	443.611	782.593	434.309
248	2.47	770.036	1247.51	196.279	810.071	1238.03	121.637	829.757	1238.62	261.912	919.644	1058.57	24.9457	918.103	1081.97	361.33	840.808	1038.52	198.89	861.326	692.785	-115.466	645.628	792.45	-75.2289	661.103	804.405	1.30866	567.727	808.665	-12.6826	476.333	781.898	10.9551	854.771	707.617	519.685	619.831	796.172	513.616	634.117	798.09	430.252	544.763	823.196	459.467	443.582	782.659	434.303
249	2.48	769.896	1247.61	196.275	810.031	1238.08	121.617	829.783	1238.62	261.901	919.651	1058.57	24.9407	918.114	1082	361.325	840.707	1038.6	198.89	861.324	692.843	-115.453	645.611	792.497	-75.24	661.096	804.458	1.29834	567.71	808.701	-12.6664	476.31	781.948	10.9539	854.795	707.593	519.677	619.879	796.179	513.604	634.172	798.102	430.272	544.78	823.202	459.47	443.572	782.695	434.276
250	2.49	769.812	1247.65	196.324	810.021	1238.1	121.602	829.77	1238.62	261.886	919.683	1058.59	24.9648	918.167	1082.02	361.347	840.718	1038.61	198.919	861.316	692.873	-115.456	645.631	792.485	-75.2225	661.098	804.47	1.3186	567.747	808.699	-12.6378	476.335	781.961	10.9822	854.878	707.625	519.701	619.909	796.172	513.612	634.252	798.118	430.286	544.839	823.21	459.489	443.613	782.708	434.3
251	2.5	769.899	1247.6	196.297	810.036	1238.07	121.591	829.735	1238.61	261.865	919.69	1058.57	24.9629	918.179	1082.02	361.361	840.745	1038.58	198.928	861.35	692.867	-115.461	645.625	792.469	-75.1967	661.114	804.441	1.32092	567.782	808.678	-12.6308	476.395	781.929	10.9677	854.892	707.634	519.712	619.89	796.159	513.624	634.245	798.114	430.283	544.874	823.195	459.493	443.616	782.701	434.314
252	2.51	769.959	1247.53	196.237	810.079	1238.02	121.53	829.691	1238.61	261.829	919.656	1058.53	24.9405	918.145	1081.99	361.319	840.837	1038.47	198.912	861.352	692.795	-115.488	645.661	792.434	-75.2257	661.151	804.394	1.29108	567.805	808.635	-12.6705	476.379	781.879	10.9577	854.823	707.618	519.717	619.854	796.153	513.629	634.21	798.087	430.255	544.835	823.158	459.462	443.608	782.66	434.281
253	2.52	769.951	1247.45	196.193	810.153	1237.97	121.445	829.699	1238.61	261.821	919.634	1058.52	24.915	918.113	1081.94	361.288	840.938	1038.36	198.868	861.383	692.735	-115.536	645.7	792.375	-75.27	661.2	804.333	1.27292	567.841	808.59	-12.6897	476.383	781.819	10.9395	854.778	707.589	519.719	619.838	796.152	513.623	634.171	798.039	430.218	544.804	823.105	459.445	443.63	782.6	434.257
254	2.53	769.962	1247.4	196.181	810.16	1237.92	121.437	829.699	1238.61	261.826	919.632	1058.51	24.9087	918.105	1081.93	361.297	841.014	1038.29	198.873	861.409	692.685	-115.561	645.72	792.347	-75.2613	661.199	804.301	1.28669	567.844	808.562	-12.7134	476.419	781.794	10.9403	854.79	707.597	519.725	619.851	796.148	513.624	634.128	798.002	430.198	544.829	823.067	459.464	443.667	782.558	434.255
255	2.54	769.951	1247.38	196.135	810.114	1237.91	121.447	829.642	1238.59	261.806	919.618	1058.51	24.9206	918.098	1081.92	361.308	840.971	1038.31	198.889	861.392	692.658	-115.54	645.72	792.337	-75.2449	661.172	804.297	1.30249	567.807	808.547	-12.6905	476.411	781.813	10.9672	854.838	707.639	519.741	619.841	796.142	513.635	634.097	797.992	430.21	544.798	823.052	459.456	443.651	782.563	434.259
256	2.55	769.87	1247.41	196.089	810.083	1237.92	121.404	829.55	1238.6	261.753	919.611	1058.51	24.9181	918.063	1081.93	361.283	840.874	1038.36	198.857	861.378	692.676	-115.517	645.701	792.352	-75.261	661.171	804.324	1.28029	567.773	808.552	-12.6886	476.386	781.826	10.9598	854.823	707.646	519.745	619.822	796.128	513.619	634.12	798.014	430.231	544.755	823.086	459.431	443.626	782.575	434.258
257	2.56	769.794	1247.46	196.082	810.052	1237.94	121.376	829.501	1238.58	261.716	919.603	1058.52	24.9087	918.02	1081.96	361.272	840.8	1038.4	198.857	861.37	692.725	-115.519	645.677	792.38	-75.2681	661.155	804.361	1.28289	567.75	808.589	-12.6867	476.374	781.846	10.9754	854.801	707.643	519.746	619.807	796.122	513.618	634.17	798.066	430.255	544.767	823.114	459.438	443.633	782.617	434.282
258	2.57	769.76	1247.48	196.104	809.997	1237.96	121.401	829.51	1238.57	261.712	919.627	1058.56	24.9309	917.99	1081.99	361.309	840.805	1038.44	198.913	861.347	692.788	-115.476	645.688	792.406	-75.2296	661.152	804.374	1.33176	567.728	808.632	-12.6227	476.34	781.883	11.0188	854.813	707.646	519.774	619.855	796.132	513.645	634.07	798.217	430.133	544.811	823.148	459.504	443.637	782.662	434.336
259	2.58	769.705	1247.48	196.115	809.934	1237.98	121.425	829.475	1238.58	261.722	919.619	1058.58	24.9542	917.958	1082	361.327	840.744	1038.49	198.934	861.314	692.809	-115.439	645.653	792.443	-75.1889	661.121	804.395	1.35593	567.71	808.634	-12.618	476.313	781.89	11.0278	854.797	707.668	519.783	619.859	796.133	513.645	633.893	798.389	429.956	544.796	823.182	459.532	443.603	782.68	434.361
260	2.59	769.671	1247.46	196.039	809.952	1237.96	121.378	829.433	1238.59	261.706	919.582	1058.57	24.9269	917.915	1082	361.304	840.681	1038.52	198.88	861.327	692.767	-115.456	645.644	792.436	-75.2277	661.1	804.399	1.3213	567.728	808.645	-12.674	476.362	781.864	10.999	854.745	707.675	519.771	619.807	796.128	513.633	634.083	798.205	430.196	544.753	823.192	459.485	443.607	782.665	434.323
261	2.6	769.63	1247.44	195.975	809.973	1237.93	121.296	829.401	1238.57	261.661	919.558	1058.55	24.8723	917.932	1081.98	361.257	840.743	1038.46	198.812	861.335	692.715	-115.508	645.696	792.381	-75.2915	661.126	804.368	1.26186	567.754	808.661	-12.7261	476.407	781.829	10.9356	854.734	707.679	519.757	619.814	796.15	513.622	634.104	798.113	430.219	544.738	823.162	459.441	443.619	782.637	434.267
262	2.61	769.574	1247.45	195.958	809.99	1237.9	121.248	829.411	1238.57	261.638	919.551	1058.52	24.8503	917.924	1081.98	361.234	840.801	1038.41	198.762	861.327	692.681	-115.55	645.695	792.356	-75.3167	661.139	804.349	1.23955	567.747	808.637	-12.7387	476.418	781.852	10.888	854.812	707.713	519.765	619.869	796.183	513.606	634.103	798.056	430.199	544.762	823.145	459.418	443.635	782.611	434.24
263	2.62	769.538	1247.45	195.931	809.971	1237.91	121.241	829.428	1238.59	261.645	919.54	1058.5	24.848	917.898	1081.99	361.237	840.771	1038.43	198.765	861.34	692.655	-115.531	645.627	792.386	-75.3004	661.128	804.369	1.23049	567.746	808.634	-12.7189	476.399	781.881	10.9007	854.862	707.748	519.751	619.887	796.196	513.607	634.117	798.047	430.219	544.736	823.135	459.408	443.608	782.606	434.247
264	2.63	769.522	1247.44	195.905	809.916	1237.92	121.234	829.381	1238.59	261.638	919.53	1058.49	24.8583	917.922	1081.99	361.239	840.657	1038.47	198.761	861.332	692.65	-115.496	645.573	792.425	-75.2839	661.067	804.393	1.22654	567.739	808.646	-12.7145	476.363	781.868	10.9205	854.811	707.719	519.724	619.847	796.185	513.607	634.13	798.052	430.232	544.726	823.147	459.41	443.573	782.623	434.251
265	2.64	769.54	1247.43	195.911	809.914	1237.9	121.221	829.392	1238.59	261.631	919.55	1058.49	24.8703	917.913	1082	361.237	840.746	1038.44	198.786	861.342	692.673	-115.509	645.586	792.419	-75.2822	661.114	804.393	1.24044	567.765	808.635	-12.7275	476.343	781.841	10.9433	854.788	707.678	519.732	619.845	796.173	513.59	634.162	798.06	430.235	544.775	823.142	459.423	443.622	782.628	434.278
266	2.65	769.666	1247.41	195.922	809.929	1237.88	121.235	829.456	1238.56	261.63	919.59	1058.48	24.8823	917.894	1082	361.249	840.869	1038.42	198.841	861.319	692.712	-115.508	645.651	792.413	-75.2707	661.187	804.396	1.27623	567.771	808.63	-12.696	476.331	781.845	10.9714	854.802	707.642	519.745	619.84	796.133	513.596	634.062	798.199	430.105	544.844	823.133	459.458	443.629	782.635	434.312
267	2.66	769.818	1247.32	195.934	809.892	1237.89	121.261	829.439	1238.54	261.63	919.57	1058.47	24.8921	917.9	1082	361.28	840.876	1038.41	198.897	861.328	692.732	-115.484	645.654	792.419	-75.2328	661.186	804.379	1.30915	567.783	808.628	-12.6248	476.345	781.855	11.0102	854.783	707.61	519.744	619.861	796.104	513.631	633.906	798.36	429.95	544.845	823.117	459.496	443.64	782.632	434.351
268	2.67	769.679	1247.35	195.926	809.853	1237.88	121.262	829.392	1238.55	261.624	919.524	1058.47	24.9068	917.909	1081.99	361.29	840.826	1038.4	198.889	861.347	692.709	-115.462	645.603	792.422	-75.1996	661.132	804.376	1.34456	567.755	808.618	-12.5946	476.331	781.849	11.0268	854.747	707.587	519.722	619.832	796.108	513.646	634.104	798.166	430.21	544.804	823.098	459.508	443.624	782.626	434.367
269	2.68	769.557	1247.37	195.9	809.863	1237.86	121.215	829.355	1238.54	261.596	919.512	1058.46	24.8906	917.878	1081.99	361.26	840.773	1038.41	198.83	861.343	692.645	-115.465	645.642	792.402	-75.2236	661.129	804.377	1.32881	567.761	808.62	-12.6517	476.347	781.831	10.9963	854.735	707.611	519.708	619.81	796.12	513.626	634.128	798.082	430.24	544.765	823.081	459.475	443.63	782.604	434.33
270	2.69	769.493	1247.4	195.813	809.897	1237.83	121.131	829.346	1238.57	261.555	919.507	1058.45	24.8448	917.867	1081.98	361.206	840.843	1038.36	198.757	861.365	692.578	-115.525	645.693	792.372	-75.293	661.143	804.352	1.25659	567.797	808.614	-12.7359	476.356	781.823	10.9403	854.808	707.672	519.712	619.843	796.151	513.603	634.122	798.04	430.213	544.77	823.093	459.417	443.646	782.584	434.262
271	2.7	769.401	1247.44	195.753	809.876	1237.82	121.1	829.301	1238.59	261.518	919.482	1058.44	24.8218	917.885	1081.99	361.187	840.806	1038.36	198.71	861.38	692.558	-115.543	645.666	792.361	-75.333	661.135	804.341	1.223	567.776	808.61	-12.7821	476.393	781.812	10.9018	854.831	707.713	519.719	619.86	796.175	513.589	634.121	798.022	430.204	544.753	823.096	459.394	443.621	782.589	434.239
272	2.71	769.364	1247.47	195.751	809.813	1237.86	121.11	829.291	1238.62	261.523	919.448	1058.47	24.8312	917.864	1082.02	361.196	840.691	1038.43	198.737	861.354	692.573	-115.504	645.631	792.378	-75.3082	661.094	804.385	1.22844	567.74	808.605	-12.7668	476.356	781.842	10.9378	854.82	707.734	519.71	619.852	796.182	513.597	634.127	798.048	430.233	544.704	823.132	459.395	443.591	782.632	434.258
273	2.72	769.371	1247.47	195.789	809.834	1237.87	121.121	829.304	1238.63	261.525	919.451	1058.48	24.8464	917.849	1082.03	361.224	840.656	1038.48	198.797	861.349	692.601	-115.473	645.613	792.4	-75.2606	661.11	804.397	1.26917	567.719	808.601	-12.7141	476.377	781.855	10.977	854.819	707.739	519.739	619.84	796.171	513.62	634.145	798.064	430.263	544.725	823.171	459.438	443.616	782.659	434.284
274	2.73	769.422	1247.48	195.801	809.872	1237.86	121.109	829.343	1238.63	261.525	919.489	1058.47	24.8544	917.874	1082.03	361.224	840.688	1038.49	198.82	861.392	692.608	-115.492	645.664	792.397	-75.2557	661.147	804.382	1.27689	567.757	808.616	-12.7134	476.445	781.846	10.9555	854.819	707.737	519.756	619.868	796.157	513.627	634.187	798.09	430.252	544.796	823.16	459.462	443.651	782.656	434.293
275	2.74	769.531	1247.45	195.789	809.888	1237.87	121.093	829.347	1238.62	261.522	919.503	1058.48	24.8555	917.876	1082.02	361.222	840.758	1038.47	198.81	861.416	692.616	-115.489	645.706	792.386	-75.2662	661.19	804.382	1.28104	567.781	808.609	-12.6689	476.441	781.844	10.956	854.803	707.71	519.773	619.88	796.155	513.626	634.227	798.1	430.251	544.804	823.138	459.455	443.671	782.644	434.308
276	2.75	769.516	1247.44	195.735	809.893	1237.87	121.078	829.324	1238.61	261.527	919.485	1058.49	24.8379	917.867	1082.03	361.227	840.687	1038.49	198.786	861.382	692.645	-115.481	645.673	792.389	-75.2615	661.171	804.382	1.27696	567.78	808.618	-12.6813	476.4	781.855	10.9772	854.819	707.72	519.77	619.85	796.159	513.621	634.194	798.093	430.255	544.79	823.158	459.45	443.626	782.655	434.289
277	2.76	769.43	1247.47	195.729	809.865	1237.89	121.076	829.293	1238.61	261.525	919.457	1058.49	24.8346	917.853	1082.04	361.234	840.655	1038.53	198.757	861.326	692.658	-115.487	645.624	792.407	-75.2599	661.096	804.416	1.27529	567.748	808.636	-12.6858	476.373	781.87	10.9639	854.815	707.742	519.764	619.842	796.171	513.61	634.183	798.09	430.252	544.771	823.177	459.46	443.607	782.667	434.287
278	2.77	769.32	1247.5	195.786	809.825	1237.9	121.078	829.278	1238.6	261.515	919.451	1058.51	24.8432	917.839	1082.06	361.209	840.652	1038.51	198.751	861.297	692.655	-115.505	645.608	792.414	-75.2736	661.099	804.421	1.2695	567.718	808.635	-12.6887	476.379	781.867	10.9559	854.803	707.754	519.744	619.865	796.194	513.603	634.174	798.093	430.242	544.764	823.173	459.441	443.615	782.647	434.286
279	2.78	769.38	1247.45	195.78	809.858	1237.85	121.08	829.292	1238.6	261.526	919.451	1058.5	24.8521	917.818	1082.04	361.201	840.724	1038.46	198.755	861.316	692.637	-115.518	645.628	792.394	-75.2518	661.129	804.376	1.28633	567.725	808.603	-12.6523	476.399	781.831	10.9635	854.767	707.734	519.75	619.811	796.169	513.602	634.098	798.072	430.225	544.73	823.145	459.438	443.624	782.613	434.298
280	2.79	769.506	1247.34	195.763	809.897	1237.81	121.087	829.285	1238.58	261.537	919.468	1058.47	24.8573	917.813	1081.99	361.195	840.855	1038.37	198.757	861.346	692.606	-115.53	645.652	792.349	-75.2461	661.15	804.32	1.29188	567.747	808.546	-12.6397	476.402	781.787	10.9533	854.718	707.696	519.752	619.772	796.14	513.624	633.936	798.167	430.066	544.721	823.099	459.445	443.648	782.565	434.283
281	2.8	769.614	1247.28	195.767	809.938	1237.78	121.082	829.306	1238.54	261.554	919.491	1058.44	24.8413	917.837	1081.97	361.179	840.999	1038.27	198.773	861.353	692.572	-115.548	645.693	792.334	-75.2733	661.167	804.282	1.28609	567.807	808.501	-12.654	476.417	781.764	10.9603	854.693	707.656	519.758	619.777	796.122	513.638	633.832	798.272	429.884	544.768	823.05	459.458	443.673	782.538	434.292
282	2.81	769.68	1247.26	195.787	809.941	1237.81	121.092	829.312	1238.53	261.565	919.506	1058.44	24.84	917.886	1081.96	361.179	841.006	1038.28	198.771	861.339	692.606	-115.563	645.684	792.351	-75.2805	661.146	804.314	1.29753	567.769	808.521	-12.6609	476.391	781.781	10.9723	854.734	707.644	519.763	619.8	796.113	513.623	633.953	798.202	430	544.787	823.059	459.454	443.667	782.559	434.313
283	2.82	769.586	1247.36	195.809	809.912	1237.87	121.136	829.344	1238.53	261.556	919.528	1058.47	24.853	917.895	1081.99	361.191	840.843	1038.43	198.781	861.318	692.671	-115.524	645.628	792.402	-75.2472	661.119	804.378	1.29999	567.744	808.592	-12.6469	476.37	781.86	10.987	854.788	707.677	519.765	619.851	796.135	513.608	633.893	798.335	429.912	544.78	823.096	459.46	443.633	782.625	434.309
284	2.83	769.411	1247.48	195.797	809.864	1237.93	121.161	829.359	1238.55	261.54	919.549	1058.52	24.8522	917.881	1082.05	361.21	840.615	1038.59	198.75	861.338	692.697	-115.452	645.566	792.47	-75.2374	661.093	804.445	1.27299	567.697	808.678	-12.6471	476.306	781.942	11.0123	854.829	707.719	519.749	619.865	796.153	513.594	634.151	798.164	430.212	544.779	823.171	459.444	443.61	782.689	434.308
285	2.84	769.385	1247.54	195.777	809.833	1237.97	121.159	829.372	1238.57	261.548	919.541	1058.54	24.8427	917.865	1082.07	361.192	840.475	1038.71	198.705	861.351	692.721	-115.443	645.548	792.51	-75.2467	661.056	804.484	1.24374	567.693	808.737	-12.6919	476.274	781.98	10.9902	854.859	707.762	519.725	619.87	796.197	513.595	634.2	798.142	430.282	544.788	823.224	459.435	443.572	782.727	434.306
286	2.85	769.39	1247.55	195.77	809.804	1237.98	121.137	829.384	1238.59	261.561	919.515	1058.53	24.8244	917.896	1082.09	361.161	840.468	1038.71	198.683	861.312	692.724	-115.465	645.53	792.499	-75.2566	661.044	804.486	1.22702	567.678	808.729	-12.7142	476.303	781.952	10.9594	854.871	707.804	519.721	619.889	796.213	513.582	634.209	798.135	430.287	544.779	823.233	459.436	443.555	782.721	434.279
287	2.86	769.422	1247.53	195.806	809.841	1237.94	121.126	829.371	1238.59	261.558	919.542	1058.5	24.8269	917.921	1082.07	361.151	840.576	1038.63	198.698	861.351	692.664	-115.499	645.595	792.43	-75.2732	661.089	804.436	1.23833	567.77	808.664	-12.7221	476.384	781.886	10.9439	854.837	707.79	519.726	619.863	796.203	513.597	634.173	798.113	430.254	544.768	823.2	459.429	443.597	782.691	434.273
288	2.87	769.526	1247.45	195.836	809.908	1237.87	121.109	829.368	1238.58	261.56	919.565	1058.44	24.8303	917.949	1082.02	361.133	840.816	1038.46	198.722	861.4	692.589	-115.543	645.662	792.367	-75.2891	661.174	804.364	1.23681	567.865	808.578	-12.7402	476.445	781.808	10.9153	854.82	707.75	519.739	619.852	796.171	513.606	634.14	798.071	430.213	544.777	823.133	459.415	443.643	782.637	434.266
289	2.88	769.751	1247.29	195.824	809.977	1237.79	121.093	829.403	1238.58	261.558	919.585	1058.4	24.8365	917.943	1081.99	361.139	841.011	1038.3	198.758	861.424	692.508	-115.59	645.723	792.316	-75.3025	661.208	804.288	1.23619	567.878	808.5	-12.7475	476.434	781.762	10.8993	854.793	707.726	519.754	619.822	796.135	513.615	633.991	798.151	430.039	544.788	823.074	459.415	443.665	782.558	434.27
290	2.89	769.825	1247.24	195.836	810.006	1237.76	121.095	829.422	1238.59	261.558	919.578	1058.36	24.8441	917.937	1081.98	361.176	841.081	1038.25	198.779	861.45	692.466	-115.588	645.741	792.286	-75.2979	661.208	804.268	1.24022	567.877	808.473	-12.7189	476.44	781.747	10.9119	854.779	707.732	519.768	619.815	796.132	513.625	633.827	798.286	429.862	544.763	823.037	459.44	443.674	782.527	434.294
291	2.9	769.765	1247.3	195.828	809.956	1237.79	121.124	829.417	1238.59	261.559	919.553	1058.37	24.8708	917.957	1082	361.235	840.937	1038.32	198.805	861.408	692.487	-115.526	645.707	792.314	-75.253	661.184	804.302	1.25969	567.851	808.493	-12.6869	476.412	781.784	10.9699	854.806	707.766	519.777	619.804	796.134	513.631	634.012	798.112	430.132	544.764	823.074	459.452	443.642	782.549	434.304
292	2.91	769.639	1247.41	195.824	809.911	1237.84	121.143	829.367	1238.59	261.529	919.532	1058.4	24.8939	917.952	1082.04	361.253	840.773	1038.41	198.799	861.379	692.56	-115.472	645.665	792.351	-75.2287	661.137	804.357	1.28933	567.749	808.557	-12.6604	476.373	781.832	11.0038	854.814	707.768	519.761	619.813	796.143	513.617	634.087	798.098	430.243	544.768	823.131	459.461	443.622	782.612	434.315
293	2.92	769.52	1247.51	195.798	809.872	1237.88	121.108	829.372	1238.61	261.511	919.525	1058.42	24.8935	917.98	1082.09	361.244	840.632	1038.53	198.81	861.329	692.626	-115.446	645.644	792.398	-75.2439	661.129	804.401	1.2831	567.717	808.63	-12.672	476.356	781.861	10.9768	854.798	707.78	519.766	619.838	796.153	513.611	634.152	798.117	430.288	544.787	823.176	459.481	443.606	782.671	434.328
294	2.93	769.486	1247.56	195.746	809.881	1237.91	121.066	829.404	1238.65	261.497	919.514	1058.45	24.8894	917.999	1082.13	361.241	840.606	1038.56	198.801	861.328	692.651	-115.467	645.641	792.434	-75.264	661.11	804.426	1.26219	567.706	808.652	-12.6727	476.331	781.899	10.9576	854.812	707.792	519.757	619.812	796.167	513.606	634.207	798.117	430.301	544.788	823.197	459.47	443.603	782.692	434.34
295	2.94	769.544	1247.54	195.723	809.991	1237.89	121.029	829.41	1238.66	261.486	919.549	1058.45	24.9167	918.012	1082.12	361.258	840.719	1038.5	198.799	861.398	692.667	-115.467	645.672	792.432	-75.2652	661.137	804.422	1.27752	567.74	808.635	-12.6671	476.364	781.903	10.9516	854.802	707.771	519.752	619.837	796.163	513.616	634.201	798.095	430.291	544.796	823.185	459.469	443.623	782.685	434.324
296	2.95	769.641	1247.52	195.705	810.073	1237.88	121.02	829.412	1238.65	261.484	919.584	1058.45	24.9076	918.034	1082.1	361.269	840.789	1038.46	198.8	861.43	692.659	-115.494	645.703	792.417	-75.2521	661.213	804.401	1.28347	567.828	808.619	-12.6746	476.428	781.871	10.9453	854.833	707.782	519.763	619.895	796.15	513.623	634.22	798.07	430.271	544.839	823.162	459.466	443.654	782.664	434.306
297	2.96	769.607	1247.51	195.692	810.071	1237.88	121.02	829.396	1238.65	261.476	919.584	1058.45	24.8881	918.001	1082.07	361.261	840.766	1038.46	198.818	861.382	692.673	-115.527	645.695	792.425	-75.2461	661.183	804.384	1.27526	567.813	808.62	-12.6779	476.397	781.874	10.9349	854.851	707.773	519.764	619.893	796.152	513.618	634.192	798.064	430.252	544.825	823.135	459.457	443.646	782.64	434.286
298	2.97	769.605	1247.51	195.665	810.037	1237.87	121.023	829.39	1238.66	261.467	919.561	1058.45	24.876	917.962	1082.06	361.256	840.73	1038.47	198.784	861.348	692.685	-115.521	645.631	792.413	-75.2429	661.132	804.375	1.27128	567.743	808.633	-12.6693	476.346	781.865	10.9509	854.807	707.762	519.763	619.833	796.157	513.606	634.127	798.065	430.248	544.772	823.142	459.438	443.633	782.622	434.267
299	2.98	769.609	1247.53	195.65	810.055	1237.88	121.018	829.373	1238.67	261.463	919.555	1058.46	24.8797	917.955	1082.07	361.264	840.727	1038.45	198.767	861.357	692.647	-115.486	645.622	792.406	-75.2517	661.118	804.373	1.26039	567.699	808.614	-12.6994	476.334	781.862	10.9462	854.804	707.771	519.764	619.815	796.171	513.609	634.12	798.067	430.239	544.736	823.128	459.422	443.628	782.601	434.259
300	2.99	769.57	1247.54	195.649	810.107	1237.89	121	829.407	1238.68	261.46	919.576	1058.48	24.8736	917.954	1082.06	361.249	840.779	1038.42	198.756	861.357	692.617	-115.479	645.636	792.398	-75.2544	661.145	804.354	1.26279	567.725	808.61	-12.7063	476.37	781.832	10.9311	854.833	707.8	519.775	619.828	796.183	513.615	634.096	798.057	430.225	544.741	823.116	459.42	443.618	782.597	434.253
301	3	769.584	1247.56	195.654	810.158	1237.89	120.994	829.447	1238.7	261.491	919.582	1058.48	24.8709	917.953	1082.04	361.249	840.84	1038.39	198.74	861.345	692.633	-115.514	645.655	792.411	-75.2665	661.121	804.352	1.25242	567.76	808.604	-12.7252	476.394	781.824	10.9165	854.824	707.79	519.785	619.831	796.175	513.621	634.11	798.055	430.212	544.749	823.119	459.423	443.628	782.586	434.248
302	3.01	769.647	1247.55	195.68	810.209	1237.9	121.03	829.439	1238.68	261.523	919.603	1058.47	24.8815	917.967	1082.02	361.257	840.903	1038.36	198.761	861.34	692.659	-115.537	645.69	792.404	-75.2582	661.154	804.335	1.26112	567.77	808.567	-12.7248	476.386	781.826	10.9202	854.788	707.747	519.788	619.805	796.151	513.624	634.138	798.049	430.215	544.76	823.102	459.416	443.659	782.592	434.267
303	3.02	769.761	1247.53	195.728	810.241	1237.92	121.09	829.456	1238.66	261.546	919.639	1058.47	24.9086	918.016	1082.01	361.27	840.94	1038.37	198.814	861.38	692.688	-115.502	645.705	792.404	-75.246	661.171	804.335	1.29329	567.789	808.545	-12.6722	476.377	781.831	10.9466	854.767	707.726	519.787	619.803	796.13	513.634	634.186	798.074	430.241	544.781	823.09	459.428	443.681	782.606	434.299
304	3.03	769.823	1247.53	195.817	810.248	1237.96	121.157	829.484	1238.64	261.57	919.672	1058.48	24.935	918.019	1082.01	361.279	840.902	1038.43	198.892	861.383	692.742	-115.452	645.672	792.455	-75.2079	661.17	804.361	1.33939	567.817	808.561	-12.636	476.386	781.862	10.999	854.791	707.722	519.794	619.808	796.131	513.646	634.196	798.117	430.285	544.789	823.124	459.469	443.666	782.636	434.346
305	3.04	769.788	1247.59	195.849	810.181	1238.01	121.2	829.501	1238.65	261.583	919.647	1058.5	24.9393	917.986	1082.03	361.297	840.826	1038.51	198.9	861.338	692.796	-115.438	645.611	792.481	-75.1728	661.114	804.396	1.35009	567.72	808.624	-12.6159	476.342	781.915	11.0032	854.782	707.731	519.782	619.799	796.138	513.63	634.183	798.154	430.305	544.76	823.163	459.488	443.621	782.682	434.345
306	3.05	769.753	1247.65	195.844	810.171	1238.04	121.216	829.514	1238.67	261.608	919.629	1058.51	24.9274	917.986	1082.02	361.292	840.741	1038.56	198.881	861.322	692.756	-115.445	645.601	792.476	-75.1974	661.082	804.415	1.33311	567.707	808.639	-12.6241	476.336	781.909	10.985	854.733	707.723	519.765	619.787	796.135	513.63	634.173	798.159	430.3	544.743	823.176	459.48	443.591	782.691	434.323
307	3.06	769.737	1247.68	195.881	810.197	1238.03	121.221	829.581	1238.7	261.632	919.66	1058.48	24.9072	918.021	1082.02	361.273	840.759	1038.54	198.826	861.365	692.695	-115.466	645.637	792.454	-75.2278	661.134	804.419	1.29906	567.771	808.617	-12.6724	476.37	781.888	10.952	854.741	707.723	519.736	619.802	796.169	513.616	634.158	798.111	430.269	544.729	823.179	459.464	443.632	782.673	434.298
308	3.07	769.839	1247.6	195.86	810.247	1237.99	121.213	829.632	1238.71	261.646	919.695	1058.46	24.882	918.034	1082.01	361.27	840.844	1038.43	198.785	861.396	692.629	-115.482	645.662	792.413	-75.261	661.176	804.376	1.26711	567.798	808.593	-12.7146	476.406	781.865	10.9309	854.794	707.738	519.721	619.818	796.19	513.603	634.127	798.066	430.219	544.757	823.157	459.441	443.651	782.634	434.287
309	3.08	769.936	1247.53	195.818	810.287	1237.94	121.167	829.599	1238.7	261.639	919.667	1058.43	24.8361	918.011	1081.97	361.229	840.953	1038.36	198.725	861.399	692.57	-115.539	645.664	792.363	-75.316	661.182	804.324	1.21173	567.766	808.572	-12.784	476.413	781.824	10.8898	854.8	707.716	519.717	619.815	796.183	513.589	634.094	798.019	430.174	544.763	823.124	459.395	443.614	782.585	434.251
310	3.09	770.015	1247.51	195.827	810.335	1237.93	121.153	829.628	1238.7	261.648	919.674	1058.42	24.8237	918.046	1081.94	361.193	841.056	1038.34	198.732	861.417	692.542	-115.565	645.721	792.338	-75.3463	661.205	804.292	1.18289	567.79	808.547	-12.8137	476.419	781.805	10.8488	854.822	707.711	519.719	619.843	796.182	513.581	634.091	797.998	430.153	544.774	823.104	459.384	443.624	782.548	434.211
311	3.1	770.001	1247.54	195.892	810.302	1237.95	121.211	829.652	1238.69	261.646	919.705	1058.43	24.8642	918.118	1081.95	361.214	841.067	1038.39	198.778	861.42	692.576	-115.537	645.729	792.358	-75.3042	661.202	804.318	1.2348	567.801	808.564	-12.758	476.421	781.82	10.8904	854.817	707.691	519.721	619.857	796.178	513.584	634.135	798.017	430.182	544.785	823.11	459.403	443.638	782.564	434.235
312	3.11	769.877	1247.61	195.967	810.223	1237.99	121.303	829.676	1238.67	261.65	919.721	1058.45	24.9068	918.129	1082	361.265	840.984	1038.45	198.843	861.367	692.667	-115.466	645.671	792.413	-75.2204	661.14	804.379	1.31449	567.752	808.601	-12.6649	476.374	781.859	10.964	854.828	707.682	519.729	619.862	796.16	513.596	634.181	798.057	430.232	544.783	823.138	459.445	443.633	782.623	434.3
313	3.12	769.821	1247.66	195.985	810.195	1238.02	121.322	829.718	1238.67	261.658	919.728	1058.47	24.9402	918.101	1082.02	361.305	840.896	1038.53	198.873	861.303	692.768	-115.423	645.625	792.461	-75.1974	661.103	804.418	1.34647	567.725	808.64	-12.6426	476.335	781.903	10.9817	854.832	707.681	519.741	619.882	796.148	513.604	634.217	798.099	430.275	544.788	823.159	459.481	443.64	782.68	434.328
314	3.13	769.953	1247.63	195.978	810.213	1238.02	121.318	829.692	1238.66	261.648	919.738	1058.49	24.943	918.133	1082.02	361.309	840.943	1038.54	198.903	861.331	692.799	-115.439	645.637	792.472	-75.2084	661.117	804.433	1.34445	567.711	808.653	-12.6528	476.318	781.907	10.9942	854.817	707.673	519.736	619.863	796.134	513.601	634.261	798.116	430.302	544.824	823.159	459.491	443.65	782.705	434.33
315	3.14	769.972	1247.61	195.954	810.244	1238.02	121.285	829.707	1238.66	261.656	919.776	1058.48	24.9479	918.204	1082.03	361.308	841.013	1038.51	198.909	861.369	692.759	-115.445	645.67	792.457	-75.2024	661.139	804.413	1.34843	567.745	808.642	-12.6314	476.358	781.884	10.9867	854.859	707.709	519.733	619.89	796.131	513.606	634.267	798.098	430.299	544.846	823.153	459.481	443.669	782.691	434.326
316	3.15	769.852	1247.62	195.937	810.293	1238	121.227	829.641	1238.67	261.635	919.763	1058.46	24.9412	918.211	1082.03	361.297	841.027	1038.48	198.867	861.391	692.703	-115.465	645.684	792.416	-75.2169	661.159	804.377	1.32378	567.79	808.601	-12.6546	476.39	781.84	10.9696	854.879	707.733	519.74	619.885	796.133	513.606	634.231	798.06	430.271	544.831	823.14	459.463	443.686	782.647	434.301
317	3.16	769.807	1247.59	195.851	810.316	1237.96	121.164	829.573	1238.66	261.596	919.724	1058.45	24.9038	918.204	1082.03	361.268	841.073	1038.48	198.832	861.408	692.673	-115.5	645.689	792.399	-75.2652	661.154	804.366	1.26445	567.805	808.574	-12.7094	476.369	781.83	10.9273	854.869	707.735	519.754	619.864	796.137	513.598	634.23	798.03	430.255	544.804	823.123	459.435	443.651	782.626	434.264
318	3.17	769.784	1247.58	195.812	810.3	1237.96	121.139	829.565	1238.67	261.577	919.723	1058.46	24.8908	918.227	1082.04	361.263	841.114	1038.45	198.811	861.385	692.685	-115.518	645.712	792.392	-75.2708	661.17	804.347	1.24787	567.789	808.569	-12.7235	476.363	781.824	10.9135	854.859	707.765	519.78	619.852	796.14	513.611	634.19	798.039	430.236	544.803	823.118	459.431	443.635	782.615	434.261
319	3.18	769.76	1247.59	195.812	810.309	1237.96	121.151	829.593	1238.69	261.592	919.745	1058.47	24.9003	918.235	1082.05	361.28	841.152	1038.45	198.829	861.377	692.684	-115.493	645.697	792.381	-75.2493	661.191	804.338	1.27578	567.761	808.558	-12.7128	476.365	781.817	10.9225	854.835	707.801	519.794	619.845	796.15	513.629	634.133	798.064	430.229	544.794	823.123	459.435	443.626	782.612	434.281
320	3.19	769.79	1247.58	195.815	810.321	1237.95	121.14	829.599	1238.71	261.612	919.743	1058.47	24.9078	918.213	1082.05	361.271	841.21	1038.43	198.838	861.358	692.661	-115.491	645.703	792.367	-75.2592	661.179	804.329	1.27883	567.762	808.57	-12.7083	476.392	781.813	10.9196	854.794	707.804	519.789	619.827	796.146	513.637	634.117	798.068	430.231	544.779	823.124	459.443	443.631	782.606	434.283
321	3.2	769.759	1247.6	195.745	810.314	1237.93	121.093	829.56	1238.72	261.591	919.735	1058.47	24.8712	918.174	1082.06	361.236	841.219	1038.47	198.785	861.382	692.663	-115.552	645.7	792.361	-75.2912	661.138	804.329	1.22837	567.767	808.579	-12.7307	476.374	781.829	10.9009	854.779	707.812	519.784	619.821	796.161	513.629	634.142	798.059	430.232	544.789	823.132	459.44	443.646	782.606	434.275
322	3.21	769.835	1247.57	195.672	810.302	1237.94	121.058	829.519	1238.72	261.555	919.759	1058.49	24.8544	918.179	1082.08	361.223	841.222	1038.5	198.755	861.413	692.688	-115.572	645.673	792.387	-75.3103	661.15	804.365	1.21387	567.808	808.603	-12.7582	476.416	781.839	10.8651	854.791	707.842	519.787	619.834	796.181	513.628	634.164	798.061	430.234	544.797	823.136	459.414	443.652	782.619	434.245
323	3.22	769.869	1247.59	195.625	810.314	1237.97	121.055	829.518	1238.72	261.525	919.777	1058.52	24.8647	918.203	1082.13	361.228	841.139	1038.58	198.746	861.427	692.714	-115.546	645.649	792.422	-75.2889	661.157	804.409	1.21446	567.791	808.637	-12.7538	476.392	781.877	10.8729	854.815	707.876	519.779	619.847	796.193	513.609	634.166	798.088	430.25	544.805	823.175	459.414	443.628	782.662	434.248
324	3.23	769.795	1247.63	195.665	810.279	1238	121.088	829.514	1238.71	261.517	919.791	1058.55	24.8826	918.206	1082.16	361.262	841.107	1038.66	198.773	861.382	692.765	-115.492	645.622	792.467	-75.2534	661.137	804.448	1.27225	567.737	808.652	-12.7056	476.321	781.924	10.9467	854.779	707.875	519.793	619.814	796.18	513.61	634.202	798.145	430.29	544.804	823.213	459.456	443.601	782.712	434.296
325	3.24	769.675	1247.67	195.758	810.21	1238.02	121.145	829.498	1238.71	261.542	919.78	1058.56	24.9037	918.195	1082.17	361.311	841.128	1038.71	198.845	861.319	692.809	-115.442	645.607	792.495	-75.2067	661.093	804.47	1.33501	567.708	808.672	-12.6473	476.303	781.933	10.999	854.78	707.877	519.819	619.8	796.178	513.635	634.204	798.18	430.327	544.779	823.218	459.496	443.591	782.732	434.337
326	3.25	769.761	1247.6	195.815	810.277	1237.99	121.146	829.547	1238.69	261.576	919.79	1058.53	24.9097	918.212	1082.15	361.32	841.273	1038.65	198.87	861.27	692.784	-115.437	645.628	792.466	-75.199	661.095	804.422	1.35262	567.755	808.645	-12.6294	476.308	781.906	11.0075	854.804	707.87	519.833	619.814	796.153	513.657	634.162	798.146	430.313	544.758	823.156	459.513	443.637	782.677	434.358
327	3.26	769.907	1247.47	195.769	810.371	1237.91	121.106	829.583	1238.66	261.554	919.85	1058.47	24.8762	918.249	1082.11	361.27	841.472	1038.51	198.817	861.32	692.711	-115.483	645.679	792.406	-75.2488	661.175	804.342	1.30351	567.818	808.579	-12.6736	476.374	781.826	10.9772	854.796	707.863	519.836	619.822	796.121	513.653	634.188	798.07	430.268	544.775	823.096	459.472	443.642	782.6	434.32
328	3.27	769.979	1247.43	195.699	810.401	1237.87	121.065	829.576	1238.63	261.534	919.886	1058.43	24.8432	918.275	1082.09	361.228	841.561	1038.43	198.742	861.351	692.624	-115.545	645.711	792.348	-75.2891	661.178	804.305	1.26727	567.83	808.527	-12.7146	476.454	781.77	10.9198	854.796	707.883	519.835	619.826	796.105	513.629	634.179	798.014	430.219	544.797	823.051	459.42	443.641	782.542	434.276
329	3.28	769.986	1247.42	195.665	810.39	1237.87	121.033	829.575	1238.65	261.515	919.901	1058.4	24.8168	918.296	1082.1	361.211	841.553	1038.44	198.695	861.362	692.576	-115.552	645.69	792.329	-75.2904	661.143	804.308	1.24083	567.806	808.528	-12.7441	476.42	781.771	10.9132	854.84	707.906	519.827	619.836	796.115	513.611	634.162	797.978	430.208	544.776	823.039	459.398	443.625	782.53	434.247
330	3.29	769.993	1247.45	195.662	810.413	1237.89	121.038	829.578	1238.67	261.505	919.928	1058.42	24.8137	918.324	1082.14	361.226	841.513	1038.52	198.704	861.363	692.588	-115.533	645.677	792.361	-75.2858	661.15	804.322	1.24833	567.801	808.542	-12.7336	476.388	781.804	10.933	854.887	707.921	519.825	619.864	796.141	513.606	634.175	797.987	430.228	544.785	823.065	459.413	443.622	782.571	434.246
331	3.3	769.916	1247.55	195.677	810.398	1237.95	121.049	829.597	1238.69	261.507	919.929	1058.44	24.8307	918.364	1082.2	361.234	841.454	1038.62	198.725	861.355	692.651	-115.513	645.667	792.415	-75.2814	661.173	804.364	1.25501	567.771	808.601	-12.7386	476.377	781.854	10.9287	854.862	707.931	519.807	619.866	796.151	513.604	634.195	798.053	430.253	544.796	823.123	459.428	443.639	782.633	434.258
332	3.31	769.914	1247.62	195.684	810.352	1238.01	121.09	829.606	1238.72	261.504	919.92	1058.49	24.8591	918.342	1082.26	361.261	841.4	1038.73	198.762	861.35	692.708	-115.478	645.653	792.453	-75.2513	661.151	804.422	1.2613	567.746	808.667	-12.7039	476.356	781.916	10.9454	854.844	707.976	519.802	619.851	796.173	513.598	634.152	798.113	430.275	544.767	823.187	459.45	443.623	782.682	434.286
333	3.32	769.812	1247.72	195.723	810.334	1238.05	121.113	829.601	1238.74	261.508	919.912	1058.52	24.8609	918.33	1082.32	361.275	841.29	1038.82	198.772	861.323	692.765	-115.44	645.625	792.479	-75.248	661.101	804.464	1.28009	567.73	808.692	-12.6858	476.313	781.952	10.9769	854.857	708.028	519.812	619.823	796.2	513.593	634.175	798.16	430.305	544.767	823.234	459.449	443.597	782.711	434.312
334	3.33	769.869	1247.73	195.692	810.411	1238.04	121.08	829.609	1238.74	261.483	919.914	1058.51	24.8413	918.368	1082.32	361.263	841.35	1038.79	198.755	861.347	692.755	-115.461	645.629	792.476	-75.2559	661.117	804.452	1.27303	567.728	808.66	-12.6936	476.358	781.931	10.9416	854.807	708.026	519.816	619.834	796.196	513.602	634.159	798.159	430.295	544.766	823.226	459.434	443.614	782.695	434.303
335	3.34	770.043	1247.66	195.655	810.509	1238.01	121.03	829.644	1238.74	261.49	919.953	1058.48	24.8347	918.436	1082.31	361.263	841.521	1038.7	198.726	861.39	692.703	-115.521	645.685	792.429	-75.2707	661.174	804.402	1.25754	567.788	808.614	-12.7126	476.437	781.866	10.8996	854.785	708.026	519.831	619.846	796.194	513.614	634.182	798.128	430.265	544.803	823.163	459.416	443.668	782.658	434.289
336	3.35	770.162	1247.59	195.646	810.564	1237.96	121.019	829.704	1238.74	261.507	919.963	1058.45	24.8345	918.452	1082.28	361.267	841.701	1038.6	198.75	861.387	692.637	-115.551	645.72	792.387	-75.2524	661.193	804.344	1.25843	567.837	808.558	-12.706	476.452	781.794	10.9077	854.791	708.019	519.851	619.827	796.169	513.619	634.183	798.077	430.243	544.794	823.112	459.433	443.681	782.612	434.286
337	3.36	770.17	1247.57	195.646	810.585	1237.92	121.021	829.741	1238.77	261.522	919.957	1058.44	24.8291	918.461	1082.27	361.277	841.739	1038.58	198.771	861.371	692.6	-115.55	645.71	792.349	-75.2462	661.186	804.297	1.26712	567.843	808.527	-12.7009	476.445	781.746	10.9404	854.776	708.021	519.846	619.824	796.146	513.633	634.118	798.021	430.232	544.776	823.078	459.447	443.668	782.565	434.278
338	3.37	770.144	1247.58	195.632	810.62	1237.91	121.011	829.753	1238.77	261.514	919.951	1058.43	24.8214	918.465	1082.27	361.269	841.755	1038.57	198.773	861.377	692.599	-115.548	645.683	792.339	-75.2775	661.176	804.294	1.26152	567.829	808.523	-12.7237	476.435	781.74	10.9283	854.797	708.04	519.854	619.832	796.144	513.638	634.137	798.001	430.237	544.751	823.067	459.433	443.644	782.544	434.258
339	3.38	770.054	1247.63	195.602	810.64	1237.94	121.007	829.745	1238.77	261.499	919.944	1058.46	24.8242	918.469	1082.3	361.275	841.766	1038.61	198.774	861.383	692.653	-115.548	645.665	792.362	-75.2783	661.177	804.332	1.25437	567.805	808.538	-12.7311	476.395	781.76	10.904	854.798	708.063	519.872	619.819	796.145	513.63	634.168	798.037	430.259	544.73	823.075	459.42	443.625	782.573	434.255
340	3.39	770.022	1247.7	195.595	810.607	1238	121.02	829.728	1238.79	261.498	919.926	1058.51	24.8434	918.446	1082.34	361.305	841.708	1038.73	198.805	861.335	692.735	-115.501	645.608	792.402	-75.2394	661.135	804.368	1.29187	567.777	808.582	-12.7059	476.337	781.805	10.944	854.785	708.093	519.872	619.78	796.156	513.616	634.14	798.088	430.289	544.703	823.115	459.427	443.619	782.616	434.288
341	3.4	769.976	1247.76	195.649	810.6	1238.03	121.056	829.717	1238.78	261.514	919.905	1058.56	24.8574	918.454	1082.39	361.325	841.664	1038.82	198.831	861.302	692.781	-115.468	645.59	792.444	-75.2093	661.082	804.394	1.33981	567.705	808.628	-12.6456	476.299	781.857	10.9978	854.748	708.107	519.864	619.761	796.154	513.62	634.141	798.137	430.307	544.703	823.159	459.443	443.637	782.654	434.303
342	3.41	770.062	1247.76	195.691	810.647	1238.06	121.069	829.762	1238.79	261.524	919.921	1058.57	24.8621	918.469	1082.43	361.326	841.711	1038.85	198.84	861.306	692.835	-115.466	645.642	792.465	-75.2174	661.084	804.407	1.33987	567.71	808.629	-12.6452	476.344	781.883	10.9873	854.742	708.12	519.88	619.754	796.15	513.622	634.183	798.162	430.332	544.754	823.161	459.461	443.638	782.661	434.312
343	3.42	770.166	1247.77	195.676	810.692	1238.09	121.071	829.791	1238.81	261.527	919.949	1058.59	24.8617	918.46	1082.44	361.324	841.73	1038.86	198.824	861.294	692.859	-115.464	645.648	792.457	-75.2174	661.093	804.417	1.33246	567.733	808.634	-12.6652	476.364	781.89	10.9847	854.8	708.123	519.896	619.802	796.16	513.642	634.21	798.139	430.334	544.789	823.152	459.46	443.604	782.661	434.311
344	3.43	770.098	1247.83	195.634	810.696	1238.1	121.063	829.828	1238.8	261.528	919.956	1058.59	24.8339	918.469	1082.45	361.311	841.726	1038.89	198.781	861.277	692.861	-115.493	645.622	792.456	-75.2205	661.067	804.422	1.31143	567.722	808.636	-12.6781	476.365	781.896	10.965	854.817	708.134	519.889	619.852	796.167	513.627	634.21	798.101	430.323	544.781	823.146	459.426	443.597	782.658	434.285
345	3.44	770.095	1247.85	195.608	810.708	1238.1	121.04	829.858	1238.79	261.521	919.97	1058.58	24.7953	918.524	1082.46	361.284	841.757	1038.89	198.735	861.29	692.832	-115.532	645.606	792.453	-75.2732	661.065	804.421	1.25969	567.725	808.634	-12.7129	476.366	781.897	10.9094	854.836	708.149	519.855	619.867	796.174	513.586	634.21	798.058	430.298	544.788	823.14	459.38	443.592	782.651	434.25
346	3.45	770.188	1247.81	195.604	810.765	1238.06	121.048	829.892	1238.78	261.534	919.989	1058.57	24.7813	918.542	1082.44	361.268	841.801	1038.88	198.711	861.309	692.804	-115.567	645.635	792.419	-75.2943	661.101	804.389	1.22218	567.732	808.626	-12.7319	476.403	781.872	10.8913	854.893	708.188	519.879	619.916	796.179	513.584	634.205	798.017	430.282	544.786	823.105	459.358	443.6	782.638	434.227
347	3.46	770.283	1247.75	195.639	810.847	1238.04	121.067	829.965	1238.78	261.571	920.007	1058.55	24.7765	918.525	1082.43	361.275	841.899	1038.84	198.712	861.333	692.752	-115.569	645.642	792.378	-75.2824	661.151	804.344	1.23709	567.768	808.614	-12.7323	476.42	781.847	10.8874	854.899	708.207	519.909	619.913	796.179	513.585	634.183	797.992	430.264	544.779	823.073	459.351	443.6	782.593	434.214
348	3.47	770.409	1247.7	195.697	810.896	1238.05	121.099	830.012	1238.78	261.621	920.058	1058.55	24.787	918.571	1082.43	361.297	842	1038.83	198.726	861.338	692.772	-115.573	645.675	792.373	-75.2796	661.162	804.326	1.2637	567.838	808.562	-12.7383	476.413	781.842	10.8835	854.841	708.178	519.914	619.878	796.148	513.59	634.214	798.008	430.265	544.791	823.056	459.361	443.634	782.57	434.235
349	3.48	770.509	1247.65	195.779	810.912	1238.06	121.192	830.023	1238.76	261.651	920.073	1058.59	24.8122	918.621	1082.47	361.335	842.052	1038.9	198.775	861.316	692.852	-115.54	645.68	792.404	-75.2536	661.158	804.363	1.29319	567.816	808.575	-12.693	476.388	781.833	10.9244	854.798	708.172	519.925	619.835	796.125	513.606	634.105	798.169	430.134	544.808	823.067	459.399	443.676	782.597	434.278
350	3.49	770.417	1247.7	195.898	810.9	1238.09	121.317	830.041	1238.74	261.685	920.078	1058.63	24.8764	918.592	1082.51	361.415	842.045	1038.98	198.894	861.288	692.942	-115.477	645.628	792.451	-75.1783	661.125	804.403	1.35306	567.755	808.593	-12.6133	476.344	781.86	11.0026	854.781	708.203	519.965	619.815	796.117	513.623	633.785	798.472	429.837	544.783	823.119	459.464	443.652	782.648	434.35
351	3.5	770.37	1247.72	195.951	810.909	1238.1	121.39	830.04	1238.74	261.719	920.103	1058.66	24.9217	918.564	1082.54	361.454	842.011	1039.06	198.963	861.304	692.975	-115.424	645.622	792.483	-75.1459	661.071	804.418	1.40494	567.7	808.608	-12.5634	476.338	781.868	11.067	854.74	708.238	520.002	619.77	796.121	513.642	633.811	798.465	429.928	544.756	823.154	459.499	443.636	782.681	434.389
352	3.51	770.331	1247.73	195.949	810.927	1238.09	121.366	830.013	1238.76	261.703	920.106	1058.66	24.9127	918.604	1082.56	361.442	842.018	1039.03	198.929	861.323	692.953	-115.449	645.67	792.463	-75.1822	661.084	804.4	1.3611	567.727	808.608	-12.6105	476.366	781.854	11.0219	854.701	708.255	519.998	619.763	796.148	513.648	634.102	798.238	430.233	544.754	823.157	459.466	443.631	782.667	434.35
353	3.52	770.322	1247.72	195.918	810.965	1238.04	121.3	830.009	1238.78	261.667	920.1	1058.62	24.8718	918.63	1082.56	361.39	842.017	1038.97	198.832	861.352	692.878	-115.525	645.712	792.414	-75.252	661.147	804.359	1.27414	567.787	808.569	-12.7056	476.426	781.827	10.9306	854.726	708.31	519.987	619.78	796.177	513.613	634.13	798.12	430.26	544.724	823.129	459.392	443.621	782.601	434.275
354	3.53	770.44	1247.68	195.839	811.011	1238.02	121.219	830.045	1238.79	261.684	920.102	1058.59	24.843	918.644	1082.55	361.376	841.999	1038.95	198.784	861.361	692.787	-115.561	645.71	792.357	-75.2973	661.187	804.322	1.23139	567.798	808.531	-12.7622	476.433	781.808	10.8945	854.768	708.362	519.974	619.784	796.194	513.582	634.117	798.028	430.237	544.703	823.099	459.335	443.594	782.553	434.214
355	3.54	770.429	1247.72	195.771	811.05	1238.01	121.166	830.049	1238.79	261.688	920.082	1058.58	24.8357	918.672	1082.57	361.397	841.965	1038.94	198.766	861.375	692.759	-115.585	645.667	792.344	-75.3222	661.182	804.312	1.19745	567.817	808.537	-12.7889	476.433	781.802	10.8608	854.787	708.367	519.953	619.779	796.202	513.585	634.118	797.991	430.228	544.708	823.09	459.318	443.605	782.565	434.184
356	3.55	770.317	1247.81	195.807	811.042	1238.04	121.201	830.099	1238.79	261.709	920.084	1058.6	24.8611	918.705	1082.6	361.448	841.88	1039	198.809	861.377	692.815	-115.557	645.628	792.396	-75.2907	661.146	804.365	1.22484	567.832	808.584	-12.7638	476.395	781.816	10.8767	854.782	708.335	519.941	619.81	796.202	513.597	634.183	798.025	430.269	544.733	823.113	459.332	443.605	782.611	434.208
357	3.56	770.238	1247.87	195.937	810.99	1238.07	121.329	830.156	1238.81	261.737	920.096	1058.64	24.9178	918.715	1082.65	361.546	841.827	1039.08	198.922	861.312	692.928	-115.47	645.612	792.462	-75.2004	661.104	804.414	1.3289	567.761	808.619	-12.6703	476.365	781.855	10.9556	854.786	708.3	519.941	619.856	796.183	513.611	634.239	798.078	430.337	544.751	823.135	459.399	443.599	782.676	434.292
358	3.57	770.256	1247.89	195.997	810.982	1238.1	121.412	830.177	1238.82	261.764	920.091	1058.68	24.9761	918.72	1082.67	361.612	841.902	1039.11	199.015	861.265	693.02	-115.433	645.606	792.51	-75.1336	661.08	804.433	1.41281	567.744	808.637	-12.5915	476.358	781.877	11.0314	854.819	708.285	519.979	619.836	796.148	513.628	634.264	798.146	430.373	544.797	823.151	459.476	443.604	782.713	434.342
359	3.58	770.314	1247.87	195.966	811.072	1238.08	121.4	830.142	1238.81	261.775	920.088	1058.7	24.9877	918.735	1082.68	361.63	841.989	1039.08	199.013	861.29	693.056	-115.474	645.623	792.51	-75.135	661.101	804.414	1.416	567.758	808.634	-12.5728	476.341	781.866	11.0332	854.787	708.289	520.005	619.796	796.126	513.642	634.274	798.158	430.378	544.823	823.139	459.497	443.656	782.685	434.33
360	3.59	770.382	1247.82	195.903	811.153	1238.05	121.332	830.071	1238.82	261.754	920.073	1058.7	24.9523	918.754	1082.68	361.612	842.105	1039.03	198.957	861.327	693.055	-115.504	645.655	792.49	-75.1786	661.155	804.374	1.36562	567.786	808.602	-12.6219	476.34	781.842	10.987	854.745	708.32	520.001	619.791	796.134	513.618	634.267	798.125	430.341	544.787	823.11	459.438	443.646	782.632	434.283
361	3.6	770.36	1247.8	195.848	811.174	1238.03	121.293	830.051	1238.82	261.741	920.077	1058.72	24.9238	918.747	1082.68	361.593	842.079	1039.04	198.926	861.285	693.029	-115.508	645.64	792.468	-75.1936	661.112	804.352	1.34425	567.742	808.59	-12.6435	476.348	781.822	10.9833	854.759	708.376	520.003	619.813	796.15	513.6	634.211	798.073	430.3	544.768	823.09	459.389	443.625	782.595	434.242
362	3.61	770.427	1247.75	195.812	811.174	1238.01	121.283	830.086	1238.82	261.746	920.087	1058.73	24.9098	918.74	1082.68	361.587	842.082	1039.02	198.914	861.216	693.02	-115.524	645.627	792.45	-75.1887	661.099	804.332	1.32823	567.748	808.559	-12.6859	476.335	781.812	10.9631	854.781	708.393	520.021	619.823	796.164	513.591	634.191	798.029	430.292	544.77	823.075	459.372	443.613	782.581	434.229
363	3.62	770.58	1247.69	195.821	811.212	1238	121.314	830.167	1238.8	261.786	920.13	1058.73	24.922	918.775	1082.66	361.59	842.171	1038.99	198.921	861.23	693.023	-115.531	645.633	792.439	-75.191	661.141	804.318	1.33852	567.775	808.535	-12.6822	476.317	781.803	10.9588	854.757	708.378	520.054	619.832	796.15	513.596	634.205	798	430.293	544.783	823.034	459.377	443.649	782.559	434.263
364	3.63	770.577	1247.7	195.886	811.272	1238.01	121.382	830.207	1238.79	261.806	920.179	1058.75	24.9343	918.782	1082.67	361.615	842.187	1039.02	198.954	861.204	693.07	-115.512	645.617	792.449	-75.1667	661.116	804.328	1.3758	567.759	808.549	-12.645	476.311	781.787	10.9939	854.778	708.372	520.073	619.821	796.119	513.591	634.252	798.028	430.324	544.783	823.044	459.393	443.662	782.572	434.285
365	3.64	770.549	1247.76	195.903	811.337	1238.06	121.429	830.282	1238.8	261.829	920.194	1058.8	24.9503	918.821	1082.7	361.619	842.13	1039.09	198.98	861.167	693.143	-115.475	645.607	792.475	-75.1359	661.077	804.361	1.41453	567.689	808.604	-12.5985	476.315	781.839	11.024	854.79	708.387	520.095	619.847	796.108	513.594	634.263	798.066	430.351	544.778	823.072	459.42	443.643	782.605	434.299
366	3.65	770.537	1247.82	195.893	811.331	1238.13	121.407	830.259	1238.82	261.83	920.187	1058.84	24.9286	918.832	1082.73	361.592	842.074	1039.16	198.952	861.195	693.175	-115.475	645.597	792.519	-75.1434	661.082	804.396	1.40483	567.648	808.628	-12.6205	476.35	781.858	10.9905	854.772	708.431	520.096	619.813	796.134	513.587	634.287	798.092	430.369	544.778	823.118	459.405	443.631	782.634	434.285
367	3.66	770.527	1247.9	195.859	811.357	1238.19	121.37	830.245	1238.86	261.818	920.183	1058.87	24.8856	918.83	1082.78	361.586	842.067	1039.23	198.888	861.231	693.225	-115.51	645.599	792.538	-75.1751	661.11	804.43	1.35072	567.667	808.661	-12.6662	476.38	781.886	10.9515	854.735	708.509	520.103	619.794	796.174	513.588	634.306	798.124	430.387	544.775	823.169	459.368	443.64	782.68	434.255
368	3.67	770.487	1247.99	195.872	811.36	1238.24	121.385	830.245	1238.89	261.835	920.204	1058.91	24.8832	918.843	1082.83	361.596	841.948	1039.31	198.864	861.226	693.239	-115.483	645.587	792.557	-75.1905	661.089	804.466	1.34806	567.682	808.715	-12.6783	476.329	781.941	10.9621	854.71	708.553	520.094	619.826	796.215	513.594	634.296	798.148	430.402	544.749	823.213	459.355	443.603	782.722	434.266
369	3.68	770.463	1248.01	195.919	811.308	1238.26	121.45	830.261	1238.88	261.86	920.189	1058.94	24.8993	918.835	1082.84	361.611	841.862	1039.34	198.896	861.188	693.225	-115.457	645.544	792.573	-75.1684	661.025	804.48	1.35944	567.657	808.699	-12.6559	476.28	781.927	11.0034	854.695	708.566	520.086	619.823	796.221	513.589	634.248	798.148	430.399	544.725	823.231	459.356	443.569	782.719	434.279
370	3.69	770.578	1247.93	195.937	811.349	1238.23	121.485	830.263	1238.84	261.864	920.144	1058.9	24.8919	918.835	1082.82	361.603	841.964	1039.28	198.941	861.199	693.2	-115.491	645.548	792.525	-75.1613	661.02	804.44	1.3657	567.659	808.637	-12.6471	476.292	781.864	11.008	854.701	708.566	520.122	619.789	796.187	513.591	634.096	798.233	430.22	544.736	823.185	459.365	443.585	782.692	434.281
371	3.7	770.758	1247.81	195.948	811.484	1238.12	121.488	830.323	1238.81	261.882	920.157	1058.83	24.8927	918.87	1082.77	361.609	842.196	1039.13	198.962	861.21	693.12	-115.523	645.637	792.444	-75.1803	661.088	804.36	1.34843	567.737	808.547	-12.644	476.338	781.797	10.9776	854.714	708.542	520.169	619.793	796.143	513.609	633.905	798.317	429.981	544.756	823.101	459.402	443.64	782.608	434.266
372	3.71	770.937	1247.68	195.936	811.599	1238.04	121.487	830.417	1238.81	261.901	920.203	1058.79	24.8956	918.897	1082.73	361.598	842.397	1039	198.96	861.241	693.046	-115.553	645.673	792.377	-75.2101	661.133	804.299	1.32612	567.809	808.496	-12.6486	476.364	781.732	10.9486	854.708	708.512	520.178	619.756	796.118	513.606	634.114	798.071	430.206	544.772	823.02	459.377	443.657	782.535	434.252
373	3.72	770.965	1247.67	195.971	811.633	1238.01	121.486	830.449	1238.81	261.921	920.221	1058.77	24.8791	918.927	1082.74	361.593	842.433	1038.98	198.936	861.263	693.026	-115.588	645.686	792.375	-75.2199	661.177	804.273	1.31693	567.835	808.473	-12.6643	476.344	781.727	10.9571	854.675	708.486	520.154	619.752	796.124	513.602	634.176	798.009	430.263	544.734	822.992	459.353	443.646	782.51	434.248
374	3.73	770.942	1247.72	196.012	811.645	1238.04	121.491	830.515	1238.82	261.942	920.232	1058.8	24.8719	918.977	1082.78	361.59	842.409	1039.04	198.917	861.249	693.074	-115.577	645.655	792.409	-75.205	661.195	804.297	1.32615	567.803	808.5	-12.6464	476.343	781.775	10.9801	854.694	708.505	520.134	619.765	796.136	513.601	634.231	798.026	430.31	544.745	823.021	459.365	443.655	782.537	434.257
375	3.74	770.827	1247.85	196.026	811.592	1238.14	121.51	830.539	1238.84	261.928	920.238	1058.85	24.8849	918.975	1082.84	361.612	842.352	1039.17	198.956	861.191	693.167	-115.521	645.613	792.484	-75.152	661.164	804.369	1.3579	567.78	808.573	-12.6199	476.33	781.83	11.0084	854.791	708.575	520.155	619.792	796.141	513.602	634.291	798.083	430.364	544.761	823.073	459.388	443.645	782.614	434.272
376	3.75	770.644	1247.99	196.013	811.533	1238.24	121.493	830.522	1238.85	261.873	920.242	1058.9	24.8838	918.92	1082.89	361.621	842.103	1039.34	198.95	861.159	693.275	-115.485	645.554	792.553	-75.1334	661.099	804.449	1.38448	567.73	808.669	-12.6146	476.299	781.9	11.0173	854.767	708.577	520.126	619.828	796.17	513.582	634.333	798.127	430.402	544.784	823.158	459.381	443.609	782.694	434.273
377	3.76	770.581	1248.07	195.95	811.483	1238.29	121.498	830.465	1238.85	261.835	920.243	1058.94	24.8769	918.904	1082.94	361.635	841.914	1039.48	198.925	861.155	693.32	-115.463	645.518	792.592	-75.1443	661.04	804.509	1.36845	567.664	808.724	-12.6422	476.253	781.953	11.009	854.716	708.568	520.063	619.822	796.191	513.566	634.328	798.178	430.436	544.766	823.212	459.375	443.57	782.746	434.285
378	3.77	770.575	1248.09	195.962	811.469	1238.29	121.505	830.542	1238.88	261.854	920.283	1058.95	24.8787	918.887	1082.96	361.627	841.893	1039.51	198.93	861.172	693.323	-115.451	645.508	792.6	-75.1245	660.993	804.528	1.38183	567.651	808.741	-12.6233	476.246	781.979	11.0241	854.768	708.595	520.054	619.848	796.208	513.576	634.325	798.162	430.448	544.759	823.209	459.399	443.546	782.752	434.309
379	3.78	770.667	1248.02	195.956	811.554	1238.21	121.482	830.6	1238.89	261.865	920.283	1058.92	24.8719	918.905	1082.94	361.608	842.081	1039.39	198.935	861.215	693.266	-115.488	645.555	792.56	-75.1261	661.084	804.467	1.38718	567.693	808.681	-12.5948	476.316	781.92	11.0144	854.81	708.639	520.084	619.879	796.201	513.59	634.304	798.111	430.411	544.793	823.159	459.408	443.578	782.693	434.304
380	3.79	770.84	1247.87	195.865	811.708	1238.11	121.373	830.56	1238.87	261.818	920.278	1058.87	24.8328	918.963	1082.92	361.575	842.248	1039.25	198.861	861.255	693.151	-115.572	645.643	792.477	-75.1926	661.149	804.366	1.34191	567.779	808.582	-12.6459	476.375	781.839	10.9806	854.757	708.639	520.086	619.85	796.183	513.577	634.241	798.039	430.318	544.777	823.093	459.352	443.611	782.589	434.241
381	3.8	771.034	1247.75	195.761	811.777	1238.03	121.25	830.495	1238.87	261.761	920.264	1058.82	24.7939	918.96	1082.9	361.549	842.344	1039.1	198.791	861.265	693.072	-115.626	645.671	792.398	-75.2525	661.184	804.291	1.26532	567.826	808.506	-12.7049	476.409	781.789	10.9234	854.691	708.643	520.08	619.812	796.183	513.57	634.161	797.992	430.231	544.722	823.03	459.294	443.627	782.505	434.181
382	3.81	771.012	1247.77	195.715	811.769	1238.04	121.204	830.455	1238.89	261.75	920.218	1058.83	24.7907	918.914	1082.92	361.538	842.34	1039.08	198.796	861.229	693.059	-115.607	645.63	792.392	-75.2413	661.177	804.283	1.2666	567.786	808.513	-12.6966	476.391	781.77	10.9353	854.735	708.688	520.097	619.813	796.188	513.571	634.134	797.99	430.218	544.698	823.036	459.285	443.62	782.507	434.196
383	3.82	770.827	1247.89	195.741	811.723	1238.1	121.252	830.496	1238.88	261.745	920.219	1058.85	24.8162	918.91	1082.95	361.552	842.19	1039.2	198.838	861.187	693.113	-115.544	645.579	792.44	-75.1712	661.152	804.356	1.3313	567.724	808.581	-12.6417	476.354	781.815	10.9858	854.776	708.715	520.105	619.824	796.192	513.571	634.164	798.03	430.271	544.71	823.079	459.322	443.616	782.559	434.249
384	3.83	770.675	1247.98	195.736	811.672	1238.15	121.288	830.462	1238.87	261.705	920.26	1058.89	24.8294	918.876	1082.99	361.556	842.071	1039.3	198.863	861.195	693.199	-115.525	645.574	792.49	-75.1443	661.101	804.408	1.36853	567.704	808.617	-12.598	476.286	781.865	11.0134	854.749	708.689	520.091	619.8	796.201	513.56	634.23	798.069	430.342	544.696	823.107	459.348	443.591	782.632	434.28
385	3.84	770.632	1248.01	195.731	811.643	1238.17	121.301	830.462	1238.87	261.687	920.269	1058.91	24.8352	918.867	1083.01	361.571	842.019	1039.38	198.879	861.201	693.249	-115.514	645.577	792.504	-75.1409	661.084	804.431	1.38351	567.69	808.635	-12.5681	476.261	781.88	11.0483	854.73	708.672	520.088	619.772	796.183	513.56	634.299	798.102	430.397	544.747	823.13	459.386	443.578	782.666	434.304
386	3.85	770.758	1247.97	195.702	811.687	1238.17	121.258	830.521	1238.86	261.682	920.289	1058.89	24.828	918.9	1083.01	361.564	842.09	1039.38	198.879	861.25	693.244	-115.527	645.615	792.511	-75.1475	661.1	804.432	1.39247	567.662	808.647	-12.5542	476.307	781.863	11.0732	854.75	708.661	520.105	619.778	796.15	513.572	634.198	798.209	430.26	544.811	823.128	459.405	443.621	782.669	434.344
387	3.86	770.924	1247.93	195.677	811.785	1238.15	121.209	830.571	1238.84	261.688	920.332	1058.89	24.8116	918.923	1083.03	361.539	842.207	1039.35	198.878	861.319	693.217	-115.553	645.672	792.503	-75.1604	661.165	804.408	1.37855	567.74	808.618	-12.5775	476.37	781.85	11.0539	854.764	708.693	520.139	619.792	796.13	513.586	634.032	798.333	430.03	544.83	823.099	459.408	443.657	782.632	434.342
388	3.87	770.98	1247.9	195.593	811.811	1238.17	121.148	830.549	1238.85	261.666	920.338	1058.88	24.7688	918.894	1083.05	361.507	842.236	1039.33	198.814	861.311	693.197	-115.585	645.656	792.472	-75.184	661.176	804.404	1.34399	567.814	808.599	-12.6103	476.369	781.833	11.0181	854.696	708.725	520.129	619.785	796.131	513.564	634.245	798.146	430.274	544.802	823.095	459.382	443.634	782.62	434.292
389	3.88	770.825	1247.94	195.566	811.745	1238.18	121.092	830.453	1238.88	261.61	920.277	1058.87	24.7366	918.819	1083.07	361.49	842.119	1039.34	198.725	861.244	693.157	-115.554	645.6	792.471	-75.2032	661.131	804.403	1.31688	567.721	808.618	-12.6145	476.318	781.854	11.0091	854.672	708.788	520.129	619.745	796.165	513.55	634.212	798.099	430.335	544.702	823.107	459.334	443.594	782.612	434.264
390	3.89	770.708	1247.99	195.559	811.682	1238.18	121.072	830.445	1238.93	261.6	920.244	1058.87	24.7107	918.782	1083.09	361.454	841.995	1039.37	198.694	861.227	693.12	-115.543	645.563	792.47	-75.2181	661.065	804.422	1.30824	567.644	808.632	-12.638	476.301	781.889	10.9826	854.666	708.873	520.141	619.763	796.196	513.54	634.129	798.077	430.323	544.657	823.123	459.309	443.588	782.603	434.252
391	3.9	770.719	1247.99	195.501	811.68	1238.18	121.012	830.404	1238.94	261.554	920.222	1058.86	24.6765	918.759	1083.11	361.42	841.961	1039.4	198.659	861.255	693.066	-115.575	645.57	792.451	-75.2462	661.049	804.407	1.28534	567.674	808.617	-12.6729	476.337	781.864	10.9499	854.663	708.928	520.159	619.767	796.224	513.537	634.076	798.076	430.297	544.654	823.108	459.289	443.576	782.603	434.233
392	3.91	770.766	1247.98	195.438	811.708	1238.15	120.969	830.398	1238.92	261.524	920.209	1058.84	24.6619	918.747	1083.11	361.391	841.968	1039.39	198.645	861.264	693.04	-115.598	645.584	792.43	-75.2617	661.102	804.38	1.2651	567.722	808.579	-12.6936	476.339	781.805	10.9424	854.649	708.933	520.165	619.759	796.21	513.521	634.07	798.063	430.278	544.657	823.071	459.279	443.533	782.584	434.223
393	3.92	770.826	1247.99	195.459	811.757	1238.16	120.988	830.465	1238.93	261.544	920.238	1058.81	24.689	918.799	1083.13	361.402	841.973	1039.38	198.665	861.257	693.035	-115.594	645.57	792.439	-75.233	661.125	804.375	1.28046	567.747	808.578	-12.6588	476.343	781.806	10.9729	854.696	708.928	520.185	619.795	796.196	513.542	633.978	798.179	430.137	544.685	823.074	459.303	443.556	782.57	434.236
394	3.93	770.843	1248.03	195.529	811.758	1238.16	121.029	830.532	1238.94	261.561	920.259	1058.8	24.6994	918.842	1083.16	361.414	842.056	1039.39	198.698	861.232	693.074	-115.59	645.592	792.461	-75.192	661.109	804.392	1.31501	567.722	808.598	-12.6393	476.334	781.851	11.0269	854.716	708.893	520.181	619.841	796.183	513.566	633.751	798.445	429.809	544.728	823.086	459.325	443.598	782.582	434.295
395	3.94	770.843	1248.06	195.554	811.737	1238.19	121.03	830.59	1238.94	261.534	920.28	1058.8	24.7008	918.874	1083.18	361.432	841.969	1039.45	198.694	861.245	693.108	-115.566	645.6	792.488	-75.1736	661.123	804.413	1.34139	567.726	808.623	-12.6233	476.311	781.883	11.0491	854.718	708.86	520.156	619.853	796.16	513.571	633.895	798.397	429.904	544.768	823.097	459.351	443.614	782.621	434.316
396	3.95	770.763	1248.12	195.479	811.688	1238.24	121.016	830.612	1238.92	261.481	920.299	1058.8	24.7002	918.885	1083.2	361.439	841.892	1039.49	198.68	861.244	693.135	-115.533	645.566	792.512	-75.1667	661.124	804.435	1.34862	567.728	808.636	-12.6103	476.327	781.9	11.0541	854.738	708.842	520.14	619.855	796.15	513.542	634.272	798.165	430.278	544.788	823.104	459.354	443.592	782.659	434.302
397	3.96	770.717	1248.17	195.43	811.657	1238.27	120.987	830.639	1238.93	261.448	920.288	1058.81	24.6913	918.85	1083.24	361.404	841.75	1039.55	198.698	861.211	693.14	-115.523	645.536	792.515	-75.1663	661.14	804.461	1.3382	567.707	808.648	-12.6109	476.325	781.893	11.0539	854.775	708.876	520.138	619.901	796.171	513.51	634.344	798.11	430.363	544.8	823.119	459.358	443.587	782.67	434.29
398	3.97	770.741	1248.14	195.422	811.649	1238.26	120.945	830.638	1238.98	261.436	920.232	1058.81	24.6743	918.819	1083.25	361.385	841.74	1039.55	198.685	861.201	693.107	-115.539	645.521	792.494	-75.186	661.096	804.455	1.33637	567.686	808.64	-12.6243	476.302	781.858	11.0413	854.765	708.921	520.134	619.897	796.192	513.515	634.331	798.104	430.373	544.752	823.126	459.348	443.582	782.655	434.28
399	3.98	770.747	1248.13	195.403	811.657	1238.23	120.924	830.56	1239.01	261.431	920.17	1058.79	24.6594	918.775	1083.24	361.38	841.874	1039.46	198.668	861.222	693.024	-115.57	645.533	792.44	-75.209	661.067	804.417	1.31065	567.696	808.602	-12.6409	476.287	781.816	11.0293	854.692	708.955	520.133	619.821	796.198	513.536	634.245	798.083	430.355	544.682	823.112	459.331	443.568	782.612	434.264
400	3.99	770.835	1248.08	195.376	811.736	1238.17	120.883	830.504	1239.04	261.435	920.149	1058.79	24.6437	918.771	1083.21	361.363	841.936	1039.34	198.63	861.257	692.959	-115.608	645.599	792.389	-75.2283	661.13	804.361	1.27605	567.702	808.57	-12.6554	476.332	781.765	11.0085	854.655	708.976	520.145	619.769	796.201	513.534	634.161	798.051	430.299	544.658	823.079	459.317	443.583	782.569	434.257
401	4	770.993	1248.02	195.32	811.767	1238.16	120.834	830.552	1239.06	261.439	920.135	1058.77	24.6349	918.781	1083.24	361.332	841.996	1039.28	198.602	861.243	692.942	-115.642	645.649	792.368	-75.2525	661.167	804.328	1.25884	567.747	808.54	-12.6818	476.358	781.752	10.9835	854.656	709.004	520.156	619.749	796.203	513.528	634.112	798.053	430.25	544.666	823.058	459.296	443.599	782.529	434.23
402	4.01	771.09	1248	195.308	811.756	1238.19	120.815	830.56	1239.06	261.425	920.1	1058.76	24.6346	918.78	1083.24	361.338	841.917	1039.34	198.606	861.221	692.966	-115.623	645.641	792.398	-75.2654	661.123	804.352	1.26849	567.738	808.539	-12.6938	476.293	781.785	10.9969	854.615	708.993	520.146	619.745	796.199	513.533	634.118	798.065	430.259	544.669	823.068	459.296	443.586	782.539	434.241
403	4.02	770.96	1248.12	195.309	811.692	1238.27	120.866	830.544	1239.07	261.408	920.097	1058.78	24.6559	918.77	1083.26	361.377	841.705	1039.49	198.628	861.206	693.018	-115.564	645.557	792.447	-75.2392	661.063	804.414	1.30422	567.651	808.622	-12.6456	476.261	781.838	11.0353	854.647	708.964	520.131	619.754	796.198	513.528	634.188	798.081	430.335	544.661	823.096	459.306	443.547	782.589	434.262
404	4.03	770.828	1248.26	195.318	811.692	1238.34	120.877	830.592	1239.08	261.399	920.13	1058.81	24.6813	918.779	1083.28	361.385	841.566	1039.58	198.624	861.206	693.061	-115.512	645.529	792.492	-75.2128	661.039	804.465	1.31797	567.647	808.706	-12.6028	476.288	781.893	11.0555	854.74	708.954	520.133	619.835	796.216	513.529	634.27	798.08	430.384	544.709	823.128	459.338	443.529	782.652	434.275
405	4.04	770.768	1248.34	195.301	811.756	1238.37	120.838	830.698	1239.09	261.407	920.175	1058.81	24.673	918.812	1083.28	361.351	841.538	1039.62	198.599	861.229	693.091	-115.524	645.555	792.518	-75.2255	661.074	804.491	1.29404	567.679	808.721	-12.6261	476.335	781.909	11.0035	854.822	708.937	520.123	619.908	796.204	513.512	634.327	798.067	430.387	544.768	823.136	459.341	443.562	782.685	434.267
406	4.05	770.761	1248.35	195.28	811.764	1238.39	120.81	830.721	1239.1	261.375	920.158	1058.79	24.6477	918.804	1083.26	361.327	841.588	1039.6	198.597	861.228	693.079	-115.541	645.557	792.492	-75.2556	661.099	804.484	1.26553	567.662	808.713	-12.6391	476.329	781.899	10.9961	854.826	708.921	520.107	619.885	796.185	513.503	634.365	798.063	430.376	544.747	823.11	459.325	443.574	782.671	434.253
407	4.06	770.789	1248.31	195.32	811.796	1238.38	120.833	830.666	1239.08	261.39	920.147	1058.79	24.6582	918.772	1083.25	361.35	841.58	1039.56	198.631	861.188	693.05	-115.531	645.542	792.483	-75.2364	661.048	804.447	1.29553	567.627	808.681	-12.6062	476.324	781.875	11.0359	854.762	708.917	520.099	619.858	796.193	513.525	634.309	798.061	430.369	544.75	823.094	459.339	443.559	782.647	434.26
408	4.07	770.816	1248.27	195.435	811.858	1238.33	120.907	830.67	1239.1	261.466	920.168	1058.77	24.7034	918.779	1083.23	361.39	841.695	1039.47	198.682	861.228	693.009	-115.517	645.597	792.449	-75.2007	661.073	804.409	1.32982	567.67	808.639	-12.5844	476.336	781.833	11.0853	854.709	708.918	520.141	619.814	796.188	513.561	634.246	798.066	430.357	544.773	823.072	459.375	443.579	782.601	434.291
409	4.08	770.907	1248.19	195.479	811.872	1238.28	120.96	830.66	1239.11	261.507	920.154	1058.76	24.7315	918.761	1083.22	361.396	841.775	1039.39	198.695	861.236	693.012	-115.533	645.612	792.42	-75.1998	661.135	804.358	1.34768	567.729	808.598	-12.5551	476.341	781.789	11.0943	854.653	708.928	520.185	619.79	796.166	513.578	634.189	798.083	430.326	544.742	823.037	459.375	443.607	782.559	434.301
410	4.09	771.022	1248.14	195.458	811.897	1238.25	120.985	830.637	1239.09	261.514	920.117	1058.75	24.7308	918.717	1083.21	361.406	841.782	1039.36	198.69	861.217	693.024	-115.554	645.577	792.415	-75.2078	661.122	804.352	1.34128	567.731	808.57	-12.5779	476.316	781.783	11.0839	854.583	708.919	520.209	619.75	796.14	513.578	634.097	798.101	430.3	544.702	823.029	459.369	443.614	782.55	434.29
411	4.1	771.001	1248.2	195.455	811.861	1238.28	121	830.608	1239.11	261.52	920.122	1058.77	24.7318	918.674	1083.21	361.404	841.721	1039.41	198.704	861.21	693.013	-115.537	645.567	792.431	-75.2123	661.114	804.378	1.32738	567.684	808.565	-12.5728	476.29	781.807	11.0906	854.541	708.93	520.201	619.717	796.16	513.566	634.063	798.117	430.296	544.66	823.057	459.337	443.585	782.558	434.279
412	4.11	770.941	1248.3	195.457	811.889	1238.36	120.988	830.643	1239.15	261.517	920.129	1058.78	24.7563	918.715	1083.23	361.406	841.648	1039.5	198.686	861.263	692.988	-115.525	645.587	792.444	-75.2236	661.137	804.393	1.32112	567.703	808.595	-12.5923	476.332	781.827	11.0717	854.583	708.96	520.201	619.74	796.198	513.563	634.112	798.118	430.323	544.659	823.093	459.324	443.576	782.593	434.291
413	4.12	770.843	1248.4	195.436	811.882	1238.43	120.922	830.707	1239.18	261.51	920.137	1058.77	24.7473	918.757	1083.23	361.382	841.585	1039.56	198.643	861.282	692.975	-115.562	645.596	792.445	-75.29	661.121	804.412	1.26533	567.728	808.636	-12.6607	476.362	781.866	11.0094	854.65	708.971	520.17	619.811	796.233	513.535	634.206	798.102	430.332	544.664	823.13	459.299	443.565	782.615	434.26
414	4.13	770.901	1248.42	195.392	811.856	1238.46	120.891	830.732	1239.18	261.489	920.165	1058.77	24.7195	918.759	1083.21	361.351	841.486	1039.59	198.591	861.277	692.988	-115.591	645.592	792.455	-75.3512	661.082	804.434	1.21427	567.702	808.654	-12.7265	476.376	781.872	10.9436	854.699	708.95	520.123	619.822	796.229	513.504	634.237	798.073	430.331	544.667	823.139	459.256	443.528	782.632	434.215
415	4.14	770.933	1248.44	195.441	811.881	1238.48	120.961	830.729	1239.15	261.495	920.213	1058.76	24.7432	918.8	1083.19	361.374	841.407	1039.61	198.64	861.324	692.992	-115.574	645.601	792.461	-75.3239	661.067	804.449	1.21999	567.712	808.646	-12.7055	476.358	781.869	10.9983	854.75	708.911	520.127	619.819	796.201	513.501	634.298	798.065	430.363	544.713	823.116	459.269	443.547	782.644	434.22
416	4.15	770.966	1248.44	195.578	811.906	1238.47	121.086	830.794	1239.17	261.591	920.265	1058.75	24.827	918.837	1083.16	361.462	841.435	1039.56	198.767	861.315	693.027	-115.516	645.595	792.476	-75.2206	661.091	804.449	1.30867	567.719	808.661	-12.6	476.357	781.876	11.0876	854.785	708.863	520.173	619.854	796.177	513.555	634.352	798.074	430.419	544.758	823.106	459.349	443.593	782.64	434.323
417	4.16	771.095	1248.4	195.651	811.925	1238.46	121.194	830.892	1239.17	261.667	920.236	1058.73	24.8936	918.797	1083.13	361.531	841.441	1039.52	198.845	861.25	693.045	-115.471	645.56	792.479	-75.1517	661.087	804.434	1.38933	567.716	808.644	-12.5208	476.311	781.862	11.152	854.748	708.799	520.18	619.847	796.151	513.584	634.328	798.094	430.434	544.749	823.093	459.403	443.587	782.631	434.375
418	4.17	771.137	1248.36	195.643	811.95	1238.42	121.169	830.858	1239.16	261.65	920.203	1058.71	24.8935	918.777	1083.09	361.523	841.484	1039.43	198.835	861.231	693.037	-115.512	645.568	792.448	-75.1863	661.075	804.404	1.36094	567.713	808.594	-12.5579	476.304	781.809	11.1073	854.665	708.759	520.169	619.802	796.122	513.571	634.261	798.084	430.388	544.729	823.058	459.399	443.586	782.602	434.33
419	4.18	771.191	1248.31	195.6	812.023	1238.39	121.084	830.797	1239.17	261.617	920.164	1058.69	24.8436	918.783	1083.06	361.488	841.529	1039.3	198.76	861.278	692.984	-115.583	645.662	792.381	-75.2872	661.151	804.341	1.27264	567.783	808.558	-12.6507	476.369	781.761	11.0124	854.643	708.778	520.166	619.78	796.139	513.536	634.183	798.062	430.297	544.702	823.032	459.331	443.602	782.552	434.246
420	4.19	771.202	1248.33	195.574	812.078	1238.41	121.037	830.802	1239.24	261.637	920.112	1058.69	24.8426	918.749	1083.07	361.477	841.488	1039.26	198.709	861.29	692.923	-115.611	645.715	792.341	-75.3353	661.167	804.338	1.22686	567.81	808.544	-12.6975	476.392	781.777	10.979	854.644	708.829	520.168	619.769	796.171	513.533	634.079	798.053	430.241	544.693	823.033	459.296	443.618	782.534	434.201
421	4.2	771.051	1248.46	195.574	811.973	1238.47	121.063	830.785	1239.3	261.666	920.03	1058.7	24.8762	918.696	1083.12	361.495	841.264	1039.36	198.71	861.219	692.953	-115.604	645.605	792.38	-75.3186	661.093	804.392	1.22042	567.704	808.599	-12.7065	476.336	781.857	10.9944	854.609	708.827	520.133	619.768	796.22	513.54	634.054	798.075	430.27	544.652	823.09	459.294	443.584	782.566	434.218
422	4.21	770.87	1248.56	195.639	811.87	1238.54	121.117	830.755	1239.31	261.692	919.988	1058.73	24.8983	918.675	1083.13	361.542	841.082	1039.46	198.75	861.165	693.044	-115.581	645.498	792.462	-75.2856	661.027	804.45	1.2572	567.638	808.678	-12.6674	476.282	781.916	11.017	854.591	708.801	520.108	619.747	796.219	513.54	634.106	798.116	430.343	544.637	823.145	459.311	443.548	782.623	434.252
423	4.22	770.943	1248.55	195.694	811.878	1238.55	121.188	830.789	1239.28	261.714	920.039	1058.75	24.9323	918.742	1083.11	361.591	841.099	1039.49	198.806	861.201	693.102	-115.533	645.537	792.495	-75.2504	661.038	804.474	1.30677	567.635	808.698	-12.6179	476.262	781.915	11.07	854.644	708.75	520.108	619.744	796.177	513.554	634.191	798.146	430.388	544.701	823.153	459.352	443.567	782.663	434.289
424	4.23	771.093	1248.49	195.771	811.93	1238.51	121.284	830.876	1239.23	261.766	920.117	1058.73	24.9907	918.786	1083.05	361.651	841.225	1039.43	198.894	861.251	693.122	-115.486	645.597	792.501	-75.1985	661.078	804.456	1.35905	567.712	808.677	-12.5463	476.276	781.894	11.1123	854.755	708.677	520.156	619.76	796.119	513.583	634.144	798.233	430.259	544.78	823.095	459.411	443.63	782.657	434.342
425	4.24	771.159	1248.43	195.827	811.931	1238.48	121.333	830.866	1239.18	261.794	920.144	1058.7	25.0185	918.743	1082.99	361.651	841.26	1039.37	198.914	861.26	693.115	-115.499	645.586	792.496	-75.1765	661.091	804.421	1.37468	567.733	808.66	-12.5303	476.278	781.864	11.1373	854.776	708.597	520.176	619.789	796.071	513.598	634.032	798.306	430.056	544.804	823.031	459.425	443.626	782.619	434.349
426	4.25	771.238	1248.38	195.799	811.944	1238.46	121.3	830.845	1239.17	261.795	920.112	1058.67	24.981	918.717	1082.94	361.613	841.228	1039.32	198.886	861.235	693.085	-115.544	645.558	792.467	-75.204	661.096	804.412	1.33313	567.727	808.639	-12.6053	476.3	781.833	11.1017	854.764	708.549	520.121	619.805	796.086	513.581	634.298	798.087	430.314	544.8	823.021	459.389	443.594	782.582	434.319
427	4.26	771.187	1248.41	195.753	811.981	1238.48	121.262	830.879	1239.22	261.798	920.094	1058.68	24.9481	918.717	1082.93	361.587	841.194	1039.3	198.831	861.273	693.036	-115.562	645.621	792.416	-75.2525	661.147	804.383	1.27053	567.75	808.63	-12.6816	476.349	781.822	11.0421	854.766	708.583	520.085	619.823	796.127	513.559	634.312	798.023	430.341	544.758	823.036	459.333	443.584	782.57	434.264
428	4.27	771.062	1248.48	195.701	811.996	1238.53	121.214	830.867	1239.26	261.79	920.068	1058.71	24.9387	918.706	1082.93	361.548	841.16	1039.29	198.788	861.288	693.001	-115.603	645.629	792.398	-75.293	661.131	804.38	1.22167	567.721	808.639	-12.7262	476.352	781.828	10.9842	854.744	708.643	520.092	619.834	796.179	513.553	634.199	798.023	430.297	544.707	823.07	459.286	443.579	782.586	434.221
429	4.28	771.05	1248.5	195.672	811.991	1238.59	121.184	830.779	1239.28	261.775	920.031	1058.72	24.9274	918.68	1082.94	361.519	841.071	1039.31	198.728	861.285	693.007	-115.606	645.579	792.419	-75.3404	661.087	804.403	1.18002	567.68	808.658	-12.7549	476.322	781.846	10.9488	854.647	708.675	520.092	619.813	796.225	513.547	634.118	798.051	430.278	544.634	823.123	459.248	443.551	782.599	434.18
430	4.29	771.053	1248.53	195.74	811.978	1238.62	121.227	830.735	1239.29	261.788	920.008	1058.76	24.9402	918.692	1082.95	361.52	841.054	1039.33	198.722	861.265	693.022	-115.583	645.558	792.447	-75.3187	661.085	804.406	1.2007	567.72	808.671	-12.7352	476.31	781.876	10.9578	854.555	708.69	520.101	619.761	796.235	513.554	634.089	798.102	430.297	544.588	823.157	459.262	443.568	782.614	434.194
431	4.3	771.138	1248.52	195.866	811.99	1238.61	121.38	830.798	1239.27	261.87	920.037	1058.78	25.0052	918.68	1082.94	361.59	841.086	1039.34	198.835	861.273	693.072	-115.519	645.567	792.488	-75.2216	661.099	804.418	1.30416	567.725	808.677	-12.6149	476.334	781.893	11.0655	854.552	708.669	520.135	619.745	796.209	513.592	633.955	798.276	430.195	544.634	823.174	459.339	443.606	782.635	434.277
432	4.31	771.271	1248.49	195.991	812.006	1238.59	121.544	830.833	1239.23	261.932	920.055	1058.77	25.0743	918.655	1082.92	361.654	841.132	1039.32	198.968	861.296	693.134	-115.465	645.6	792.506	-75.1396	661.097	804.424	1.42361	567.729	808.666	-12.4947	476.325	781.881	11.1753	854.578	708.599	520.186	619.752	796.164	513.629	633.666	798.537	429.88	544.698	823.16	459.428	443.612	782.653	434.36
433	4.32	771.397	1248.45	196.053	812.015	1238.57	121.604	830.858	1239.19	261.969	920.061	1058.73	25.0752	918.685	1082.87	361.669	841.186	1039.28	199	861.273	693.14	-115.481	645.599	792.494	-75.126	661.088	804.403	1.42877	567.727	808.622	-12.4726	476.341	781.839	11.1678	854.613	708.542	520.197	619.746	796.131	513.626	633.623	798.579	429.808	544.726	823.116	459.461	443.623	782.638	434.382
434	4.33	771.386	1248.46	196.051	812.02	1238.57	121.571	830.963	1239.18	261.973	920.072	1058.69	25.0372	918.696	1082.83	361.657	841.278	1039.23	198.954	861.288	693.073	-115.511	645.627	792.458	-75.1837	661.112	804.378	1.37516	567.739	808.599	-12.5375	476.354	781.817	11.1152	854.651	708.493	520.169	619.756	796.116	513.607	633.81	798.445	429.917	544.751	823.072	459.428	443.629	782.615	434.344
435	4.34	771.343	1248.49	196.01	812.048	1238.59	121.505	831.035	1239.23	261.949	920.083	1058.65	25.0219	918.751	1082.79	361.632	841.187	1039.21	198.881	861.335	692.964	-115.523	645.652	792.408	-75.2411	661.139	804.368	1.31787	567.775	808.598	-12.5754	476.357	781.828	11.0856	854.725	708.489	520.129	619.797	796.14	513.601	634.149	798.142	430.244	544.755	823.065	459.382	443.603	782.598	434.291
436	4.35	771.282	1248.48	195.942	812.072	1238.61	121.417	831.039	1239.28	261.928	920.086	1058.62	24.9823	918.788	1082.78	361.59	841.069	1039.19	198.79	861.316	692.881	-115.526	645.636	792.387	-75.3053	661.121	804.359	1.2397	567.769	808.621	-12.6261	476.385	781.845	11.0443	854.786	708.539	520.094	619.867	796.184	513.575	634.23	798.002	430.313	544.75	823.066	459.323	443.56	782.579	434.233
437	4.36	771.172	1248.52	195.892	812.077	1238.61	121.336	831.018	1239.29	261.907	920.066	1058.61	24.9342	918.76	1082.76	361.512	840.983	1039.18	198.715	861.308	692.843	-115.559	645.603	792.399	-75.3732	661.11	804.357	1.17522	567.713	808.615	-12.7079	476.366	781.845	10.9816	854.811	708.522	520.045	619.894	796.204	513.531	634.246	797.956	430.303	544.75	823.077	459.261	443.554	782.565	434.166
438	4.37	771.18	1248.53	195.898	812.075	1238.59	121.376	831.017	1239.26	261.919	920.055	1058.61	24.9306	918.708	1082.74	361.512	841.003	1039.14	198.717	861.29	692.865	-115.576	645.608	792.406	-75.379	661.115	804.36	1.1732	567.719	808.624	-12.7183	476.38	781.853	10.9729	854.792	708.47	520.039	619.859	796.186	513.542	634.225	797.98	430.295	544.76	823.082	459.266	443.595	782.562	434.178
439	4.38	771.335	1248.54	195.982	812.084	1238.58	121.499	831.032	1239.25	261.956	920.052	1058.63	24.9743	918.664	1082.74	361.568	841.1	1039.12	198.847	861.284	692.93	-115.552	645.607	792.41	-75.2961	661.128	804.363	1.24545	567.73	808.637	-12.6515	476.392	781.851	11.0476	854.754	708.446	520.075	619.81	796.176	513.57	634.218	798.043	430.317	544.735	823.083	459.328	443.618	782.576	434.237
440	4.39	771.409	1248.55	196.076	812.085	1238.6	121.577	831.05	1239.26	262.006	920.05	1058.67	25.0368	918.661	1082.77	361.618	841.159	1039.16	198.968	861.299	693	-115.517	645.588	792.45	-75.2277	661.164	804.396	1.3041	567.754	808.629	-12.5587	476.388	781.853	11.1328	854.676	708.434	520.109	619.733	796.149	513.602	634.198	798.121	430.35	544.715	823.097	459.394	443.625	782.612	434.307
441	4.4	771.497	1248.54	196.062	812.048	1238.64	121.584	831.031	1239.27	261.982	920.037	1058.7	25.0505	918.586	1082.8	361.636	841.134	1039.22	198.967	861.309	693.051	-115.498	645.592	792.485	-75.2171	661.147	804.431	1.32112	567.788	808.657	-12.5348	476.36	781.893	11.1466	854.603	708.419	520.109	619.705	796.137	513.614	634.201	798.191	430.372	544.721	823.142	459.421	443.619	782.652	434.342
442	4.41	771.385	1248.63	196.011	812.035	1238.7	121.526	831.008	1239.29	261.92	920.013	1058.72	25.0446	918.57	1082.81	361.614	840.997	1039.28	198.919	861.273	693.079	-115.501	645.576	792.504	-75.214	661.094	804.472	1.31201	567.723	808.71	-12.5551	476.316	781.936	11.1356	854.594	708.412	520.072	619.729	796.168	513.604	634.223	798.217	430.381	544.727	823.194	459.414	443.597	782.705	434.332
443	4.42	771.196	1248.73	195.917	812.033	1238.73	121.439	830.999	1239.33	261.878	920.003	1058.71	25.0131	918.59	1082.84	361.592	840.884	1039.3	198.859	861.292	693.063	-115.507	645.533	792.512	-75.2369	661.084	804.503	1.2769	567.731	808.731	-12.6152	476.315	781.969	11.1161	854.637	708.43	520.028	619.79	796.208	513.599	634.24	798.197	430.38	544.734	823.203	459.378	443.584	782.726	434.29
444	4.43	771.092	1248.74	195.828	812.029	1238.73	121.334	830.977	1239.33	261.845	919.984	1058.68	24.9866	918.596	1082.81	361.547	840.786	1039.29	198.788	861.285	693.005	-115.52	645.5	792.503	-75.2825	661.066	804.488	1.24912	567.702	808.736	-12.6625	476.317	781.985	11.0767	854.695	708.454	520.008	619.844	796.224	513.567	634.237	798.134	430.357	544.731	823.176	459.337	443.559	782.703	434.253
445	4.44	771.152	1248.65	195.791	812.014	1238.66	121.303	830.983	1239.31	261.832	919.961	1058.62	24.9742	918.589	1082.74	361.529	840.839	1039.2	198.77	861.254	692.912	-115.546	645.524	792.458	-75.327	661.057	804.426	1.22908	567.685	808.66	-12.6825	476.353	781.925	11.0713	854.752	708.419	520.009	619.846	796.188	513.555	634.23	798.042	430.328	544.719	823.11	459.31	443.551	782.629	434.236
446	4.45	771.353	1248.5	195.77	812.064	1238.53	121.283	830.985	1239.27	261.836	919.959	1058.54	24.9641	918.558	1082.65	361.503	841.059	1038.99	198.78	861.258	692.817	-115.576	645.586	792.353	-75.3341	661.101	804.311	1.23822	567.709	808.556	-12.6852	476.347	781.833	11.0675	854.775	708.368	520.034	619.835	796.143	513.571	634.219	797.952	430.287	544.732	823.019	459.315	443.597	782.524	434.233
447	4.46	771.488	1248.38	195.765	812.156	1238.44	121.245	830.998	1239.24	261.835	919.993	1058.48	24.9588	918.597	1082.6	361.489	841.323	1038.83	198.79	861.293	692.722	-115.611	645.7	792.278	-75.3432	661.182	804.225	1.23701	567.812	808.461	-12.6742	476.447	781.727	11.0722	854.802	708.353	520.074	619.848	796.101	513.599	634.23	797.898	430.257	544.808	822.944	459.336	443.678	782.433	434.241
448	4.47	771.466	1248.4	195.743	812.143	1238.46	121.227	830.947	1239.24	261.801	920.003	1058.49	24.964	918.577	1082.6	361.512	841.306	1038.86	198.797	861.341	692.721	-115.606	645.749	792.279	-75.335	661.208	804.236	1.22515	567.847	808.463	-12.6495	476.463	781.729	11.0767	854.806	708.34	520.082	619.813	796.095	513.609	634.111	798.033	430.11	544.812	822.961	459.351	443.685	782.454	434.259
449	4.48	771.211	1248.55	195.74	812.032	1238.57	121.26	830.881	1239.28	261.767	919.945	1058.58	24.9936	918.494	1082.67	361.541	840.995	1039.04	198.823	861.291	692.836	-115.539	645.637	792.383	-75.2795	661.123	804.354	1.26764	567.715	808.581	-12.6222	476.358	781.843	11.1165	854.751	708.345	520.049	619.783	796.137	513.6	633.91	798.289	429.959	544.718	823.072	459.365	443.623	782.579	434.298
450	4.49	770.912	1248.78	195.735	811.885	1238.71	121.256	830.78	1239.33	261.719	919.888	1058.68	25.0028	918.452	1082.75	361.548	840.685	1039.27	198.815	861.267	692.963	-115.47	645.514	792.518	-75.2494	661.033	804.497	1.28801	567.621	808.716	-12.6124	476.313	781.965	11.1327	854.694	708.397	520.03	619.798	796.201	513.587	634.167	798.222	430.293	544.706	823.2	459.383	443.56	782.713	434.314
451	4.5	770.821	1248.89	195.66	811.868	1238.82	121.175	830.788	1239.36	261.674	919.91	1058.74	24.9711	918.453	1082.8	361.517	840.622	1039.38	198.761	861.329	693.033	-115.478	645.506	792.583	-75.2803	661.049	804.579	1.26249	567.691	808.789	-12.6413	476.348	782.04	11.1108	854.713	708.457	520.017	619.801	796.232	513.555	634.25	798.243	430.381	544.725	823.289	459.379	443.542	782.787	434.299
452	4.51	770.785	1248.91	195.578	811.873	1238.81	121.108	830.791	1239.35	261.627	919.912	1058.74	24.9351	918.43	1082.8	361.472	840.551	1039.4	198.721	861.357	693.03	-115.51	645.528	792.574	-75.3192	661.074	804.583	1.23647	567.711	808.805	-12.6625	476.336	782.068	11.0747	854.731	708.458	520.005	619.829	796.242	513.535	634.293	798.235	430.387	544.73	823.292	459.342	443.562	782.795	434.271
453	4.52	770.859	1248.79	195.558	811.858	1238.7	121.087	830.738	1239.32	261.607	919.886	1058.68	24.9273	918.422	1082.75	361.46	840.616	1039.3	198.723	861.359	692.918	-115.522	645.525	792.523	-75.3146	661.079	804.525	1.22897	567.674	808.738	-12.6393	476.321	782.02	11.0931	854.753	708.424	520.003	619.82	796.215	513.54	634.286	798.161	430.376	544.715	823.23	459.338	443.567	782.735	434.273
454	4.53	771.061	1248.6	195.574	811.916	1238.55	121.059	830.71	1239.27	261.614	919.897	1058.58	24.9194	918.417	1082.65	361.448	840.934	1039.06	198.735	861.38	692.777	-115.56	645.581	792.41	-75.318	661.148	804.406	1.23239	567.776	808.597	-12.6457	476.404	781.881	11.095	854.758	708.375	520.032	619.807	796.172	513.576	634.26	798.057	430.34	544.753	823.128	459.355	443.611	782.611	434.28
455	4.54	771.279	1248.4	195.568	812.033	1238.38	121.038	830.757	1239.22	261.63	919.942	1058.47	24.9048	918.44	1082.55	361.426	841.252	1038.8	198.73	861.431	692.64	-115.629	645.703	792.282	-75.3481	661.226	804.262	1.21478	567.884	808.454	-12.6702	476.496	781.734	11.0926	854.804	708.326	520.085	619.831	796.113	513.598	634.133	798.06	430.124	544.807	822.976	459.35	443.674	782.482	434.258
456	4.55	771.416	1248.27	195.529	812.043	1238.28	121	830.753	1239.18	261.588	919.928	1058.4	24.8772	918.418	1082.5	361.382	841.295	1038.69	198.694	861.418	692.562	-115.669	645.73	792.222	-75.3795	661.258	804.195	1.18502	567.939	808.386	-12.6851	476.54	781.679	11.0626	854.815	708.3	520.09	619.844	796.087	513.597	633.967	798.134	429.897	544.788	822.903	459.326	443.686	782.419	434.232
457	4.56	771.258	1248.33	195.483	811.947	1238.31	120.945	830.682	1239.18	261.547	919.883	1058.4	24.8747	918.362	1082.51	361.369	841.127	1038.76	198.673	861.369	692.592	-115.643	645.657	792.252	-75.3613	661.219	804.24	1.19412	567.884	808.425	-12.653	476.425	781.722	11.0652	854.765	708.274	520.045	619.815	796.089	513.577	634.154	797.964	430.165	544.735	822.94	459.321	443.623	782.457	434.232
458	4.57	771.112	1248.44	195.459	811.8	1238.44	120.943	830.659	1239.23	261.51	919.851	1058.48	24.8915	918.328	1082.61	361.402	840.855	1038.98	198.673	861.331	692.727	-115.585	645.575	792.361	-75.3256	661.115	804.369	1.23723	567.753	808.578	-12.6048	476.332	781.85	11.1024	854.732	708.315	520.017	619.814	796.147	513.571	634.235	798	430.3	544.686	823.055	459.338	443.574	782.569	434.261
459	4.58	770.872	1248.63	195.447	811.698	1238.6	120.953	830.654	1239.3	261.469	919.836	1058.58	24.8888	918.327	1082.72	361.428	840.597	1039.21	198.672	861.296	692.883	-115.511	645.508	792.493	-75.2846	661.043	804.508	1.26065	567.705	808.722	-12.5892	476.303	781.986	11.1492	854.714	708.385	520	619.805	796.207	513.569	634.276	798.11	430.376	544.674	823.199	459.355	443.554	782.695	434.294
460	4.59	770.673	1248.75	195.405	811.6	1238.7	120.936	830.573	1239.32	261.416	919.796	1058.62	24.8774	918.323	1082.79	361.416	840.451	1039.34	198.673	861.28	692.95	-115.465	645.452	792.571	-75.273	660.959	804.589	1.25942	567.659	808.81	-12.5952	476.278	782.06	11.1416	854.676	708.42	519.971	619.779	796.227	513.564	634.257	798.2	430.397	544.671	823.274	459.349	443.498	782.787	434.314
461	4.6	770.747	1248.71	195.347	811.576	1238.65	120.886	830.495	1239.3	261.361	919.783	1058.61	24.8661	918.309	1082.79	361.386	840.516	1039.32	198.679	861.308	692.911	-115.495	645.469	792.553	-75.2861	660.988	804.572	1.22876	567.656	808.809	-12.6205	476.307	782.03	11.1371	854.655	708.411	519.971	619.734	796.207	513.565	634.258	798.219	430.396	544.685	823.255	459.359	443.505	782.79	434.315
462	4.61	770.932	1248.61	195.344	811.653	1238.54	120.838	830.503	1239.26	261.376	919.787	1058.56	24.8678	918.322	1082.74	361.363	840.751	1039.16	198.695	861.366	692.8	-115.556	645.582	792.483	-75.3029	661.112	804.5	1.22287	567.741	808.728	-12.6301	476.358	781.949	11.1243	854.705	708.41	520.005	619.773	796.19	513.588	634.253	798.17	430.361	544.738	823.201	459.389	443.595	782.704	434.319
463	4.62	770.985	1248.5	195.374	811.707	1238.41	120.821	830.562	1239.25	261.408	919.786	1058.48	24.8763	918.294	1082.67	361.376	841.01	1038.96	198.728	861.339	692.662	-115.571	645.655	792.379	-75.3033	661.188	804.395	1.24521	567.832	808.594	-12.5996	476.397	781.851	11.14	854.773	708.392	520.034	619.847	796.182	513.614	634.074	798.199	430.156	544.766	823.107	459.4	443.655	782.591	434.331
464	4.63	770.972	1248.4	195.326	811.704	1238.32	120.768	830.569	1239.24	261.348	919.776	1058.41	24.842	918.29	1082.6	361.334	840.989	1038.82	198.674	861.319	692.555	-115.595	645.654	792.304	-75.3347	661.193	804.303	1.23021	567.834	808.506	-12.642	476.39	781.776	11.1196	854.826	708.357	520.018	619.834	796.174	513.594	633.875	798.234	429.923	544.741	823.023	459.353	443.646	782.516	434.291
465	4.64	770.991	1248.35	195.194	811.722	1238.29	120.641	830.532	1239.21	261.266	919.759	1058.37	24.7856	918.286	1082.57	361.278	840.979	1038.75	198.566	861.321	692.51	-115.629	645.623	792.277	-75.39	661.181	804.262	1.1569	567.794	808.494	-12.7137	476.396	781.76	11.043	854.82	708.322	519.977	619.815	796.153	513.556	634.073	797.96	430.122	544.717	822.974	459.293	443.607	782.487	434.213
466	4.65	770.965	1248.36	195.133	811.713	1238.32	120.557	830.527	1239.23	261.226	919.755	1058.36	24.7612	918.271	1082.58	361.243	840.949	1038.76	198.516	861.345	692.509	-115.653	645.597	792.305	-75.4066	661.147	804.3	1.10726	567.752	808.534	-12.7536	476.404	781.794	11.0037	854.808	708.327	519.954	619.819	796.153	513.532	634.157	797.906	430.182	544.731	822.991	459.263	443.582	782.501	434.18
467	4.66	770.841	1248.47	195.15	811.674	1238.39	120.563	830.526	1239.25	261.196	919.763	1058.41	24.7825	918.274	1082.6	361.267	840.757	1038.92	198.552	861.338	692.582	-115.612	645.552	792.372	-75.3494	661.129	804.378	1.14147	567.719	808.606	-12.728	476.372	781.867	11.0401	854.834	708.327	519.955	619.858	796.165	513.54	634.076	798.094	430.093	544.742	823.05	459.289	443.57	782.575	434.214
468	4.67	770.77	1248.59	195.147	811.639	1238.46	120.602	830.471	1239.24	261.145	919.769	1058.47	24.8192	918.292	1082.66	361.317	840.671	1039.07	198.633	861.332	692.712	-115.556	645.54	792.451	-75.2993	661.113	804.454	1.19874	567.707	808.696	-12.6677	476.337	781.948	11.0748	854.823	708.309	519.961	619.877	796.179	513.556	634.024	798.353	429.969	544.768	823.109	459.35	443.589	782.672	434.254
469	4.68	770.681	1248.66	195.167	811.571	1238.49	120.625	830.448	1239.24	261.139	919.79	1058.52	24.8576	918.276	1082.69	361.353	840.643	1039.16	198.696	861.34	692.815	-115.521	645.555	792.504	-75.2689	661.088	804.507	1.26757	567.701	808.719	-12.6267	476.335	781.977	11.1132	854.801	708.307	519.985	619.854	796.182	513.572	634.341	798.238	430.317	544.823	823.179	459.415	443.597	782.726	434.303
470	4.69	770.654	1248.68	195.177	811.534	1238.49	120.632	830.465	1239.24	261.15	919.791	1058.53	24.879	918.258	1082.7	361.386	840.669	1039.17	198.758	861.306	692.854	-115.495	645.567	792.516	-75.2262	661.068	804.521	1.31663	567.683	808.733	-12.5733	476.307	781.976	11.1788	854.773	708.293	520.016	619.823	796.169	513.59	634.386	798.213	430.407	544.846	823.195	459.466	443.614	782.748	434.357
471	4.7	770.652	1248.63	195.154	811.547	1238.46	120.599	830.457	1239.24	261.139	919.761	1058.51	24.8701	918.222	1082.66	361.376	840.693	1039.1	198.757	861.298	692.804	-115.495	645.574	792.485	-75.2107	661.082	804.495	1.31885	567.679	808.679	-12.5528	476.304	781.953	11.1935	854.785	708.298	520.023	619.817	796.153	513.596	634.341	798.176	430.403	544.819	823.17	459.458	443.615	782.703	434.35
472	4.71	770.675	1248.54	195.092	811.607	1238.39	120.532	830.403	1239.24	261.084	919.718	1058.47	24.8201	918.203	1082.61	361.323	840.734	1038.99	198.641	861.316	692.697	-115.531	645.575	792.423	-75.2745	661.114	804.441	1.26951	567.744	808.617	-12.6355	476.336	781.897	11.119	854.722	708.296	519.99	619.813	796.163	513.564	634.239	798.095	430.327	544.754	823.117	459.387	443.59	782.629	434.277
473	4.72	770.838	1248.38	194.989	811.655	1238.32	120.446	830.33	1239.23	261.049	919.677	1058.42	24.7573	918.178	1082.56	361.25	840.759	1038.89	198.554	861.344	692.551	-115.585	645.596	792.344	-75.3444	661.143	804.36	1.18899	567.766	808.558	-12.6955	476.376	781.84	11.0447	854.712	708.316	519.966	619.803	796.185	513.56	634.143	797.996	430.252	544.686	823.061	459.308	443.588	782.554	434.215
474	4.73	770.833	1248.32	194.948	811.646	1238.29	120.387	830.298	1239.24	261.037	919.669	1058.39	24.7296	918.147	1082.52	361.214	840.794	1038.8	198.486	861.365	692.451	-115.614	645.604	792.296	-75.4038	661.136	804.296	1.13117	567.775	808.512	-12.7675	476.418	781.779	10.9947	854.722	708.341	519.969	619.81	796.202	513.558	634.075	797.923	430.209	544.633	823.015	459.256	443.589	782.502	434.176
475	4.74	771.709	1247.97	194.709	811.641	1238.28	120.366	830.33	1239.26	261.044	919.685	1058.39	24.722	918.151	1082.51	361.208	840.894	1038.76	198.474	861.377	692.429	-115.633	645.624	792.27	-75.4266	661.144	804.283	1.11468	567.801	808.516	-12.7968	476.434	781.755	10.9779	854.718	708.355	519.985	619.795	796.21	513.557	634.083	797.942	430.18	544.645	823.017	459.253	443.598	782.486	434.179
476	4.75	772.71	1247.57	194.417	811.652	1238.3	120.38	830.378	1239.29	261.048	919.715	1058.41	24.7326	918.186	1082.54	361.221	840.912	1038.82	198.512	861.405	692.495	-115.613	645.67	792.307	-75.4031	661.18	804.335	1.13811	567.829	808.536	-12.7637	476.438	781.792	10.9946	854.72	708.361	520.018	619.762	796.199	513.561	634.148	798.008	430.204	544.689	823.059	459.286	443.602	782.532	434.197
477	4.76	771.21	1248.24	194.901	811.586	1238.32	120.462	830.349	1239.24	261.064	919.736	1058.44	24.7745	918.189	1082.58	361.259	840.801	1038.98	198.579	861.406	692.602	-115.547	645.637	792.388	-75.3238	661.167	804.404	1.20044	567.789	808.588	-12.6819	476.418	781.854	11.0609	854.728	708.344	520.047	619.767	796.181	513.569	634.221	798.088	430.291	544.717	823.117	459.351	443.598	782.611	434.26
478	4.77	770.749	1248.47	195.091	811.477	1238.38	120.544	830.369	1239.21	261.086	919.762	1058.47	24.8275	918.203	1082.64	361.301	840.729	1039.11	198.67	861.375	692.708	-115.484	645.588	792.469	-75.244	661.094	804.462	1.27992	567.705	808.627	-12.6083	476.352	781.943	11.1435	854.773	708.331	520.059	619.815	796.178	513.599	634.303	798.151	430.383	544.763	823.17	459.425	443.606	782.689	434.339
479	4.78	770.679	1248.54	195.147	811.432	1238.42	120.582	830.368	1239.19	261.089	919.813	1058.49	24.8485	918.202	1082.65	361.318	840.694	1039.14	198.707	861.346	692.762	-115.463	645.586	792.505	-75.2195	661.09	804.496	1.31729	567.722	808.687	-12.5975	476.3	781.984	11.1797	854.779	708.318	520.054	619.823	796.186	513.603	634.355	798.171	430.419	544.799	823.177	459.461	443.626	782.72	434.38
480	4.79	770.669	1248.48	195.109	811.435	1238.38	120.585	830.398	1239.18	261.072	919.816	1058.47	24.8325	918.208	1082.63	361.297	840.685	1039.09	198.681	861.329	692.738	-115.485	645.595	792.488	-75.2431	661.111	804.489	1.296	567.76	808.694	-12.6248	476.334	781.975	11.135	854.781	708.302	520.044	619.844	796.178	513.587	634.36	798.14	430.401	544.804	823.165	459.441	443.63	782.714	434.351
481	4.8	770.7	1248.41	195.034	811.437	1238.31	120.518	830.382	1239.16	261.037	919.783	1058.41	24.7976	918.211	1082.59	361.26	840.644	1039.04	198.597	861.355	692.648	-115.538	645.597	792.433	-75.3064	661.131	804.461	1.22535	567.731	808.638	-12.6604	476.365	781.921	11.0566	854.772	708.3	520.032	619.842	796.175	513.578	634.308	798.087	430.343	544.795	823.127	459.399	443.621	782.678	434.303
482	4.81	770.739	1248.3	194.958	811.416	1238.23	120.437	830.314	1239.14	261	919.75	1058.34	24.7416	918.24	1082.57	361.194	840.742	1038.92	198.528	861.364	692.516	-115.592	645.614	792.359	-75.3843	661.132	804.394	1.158	567.76	808.582	-12.7326	476.401	781.839	11.0015	854.788	708.305	519.999	619.838	796.178	513.562	634.218	798.019	430.274	544.78	823.082	459.332	443.597	782.603	434.228
483	4.82	770.736	1248.22	194.947	811.432	1238.16	120.369	830.314	1239.15	260.999	919.749	1058.29	24.7161	918.248	1082.54	361.164	840.937	1038.77	198.464	861.397	692.413	-115.623	645.664	792.284	-75.4283	661.147	804.329	1.11081	567.849	808.536	-12.783	476.449	781.807	10.9747	854.785	708.301	519.961	619.869	796.195	513.549	634.185	797.947	430.225	544.767	823.045	459.29	443.617	782.535	434.186
484	4.83	770.73	1248.16	194.962	811.438	1238.11	120.379	830.28	1239.15	261.02	919.726	1058.27	24.7211	918.263	1082.54	361.175	840.949	1038.73	198.469	861.408	692.378	-115.625	645.69	792.262	-75.4284	661.208	804.303	1.12213	567.874	808.518	-12.7728	476.447	781.803	10.9845	854.801	708.329	519.96	619.871	796.196	513.546	634.183	797.941	430.213	544.747	823.04	459.291	443.616	782.514	434.182
485	4.84	770.686	1248.15	194.972	811.351	1238.1	120.401	830.168	1239.11	261.001	919.708	1058.29	24.753	918.274	1082.56	361.197	840.834	1038.76	198.503	861.385	692.423	-115.601	645.656	792.304	-75.3997	661.168	804.34	1.1561	567.794	808.546	-12.7526	476.397	781.836	11.0298	854.775	708.325	519.972	619.821	796.185	513.565	634.172	797.979	430.234	544.755	823.062	459.306	443.598	782.542	434.195
486	4.85	770.582	1248.16	194.982	811.203	1238.11	120.458	830.094	1239.09	261	919.684	1058.32	24.7842	918.25	1082.6	361.241	840.688	1038.84	198.563	861.317	692.519	-115.57	645.578	792.387	-75.3436	661.119	804.4	1.18134	567.728	808.606	-12.691	476.352	781.881	11.0577	854.782	708.315	519.975	619.808	796.176	513.564	634.218	798.041	430.279	544.747	823.103	459.322	443.609	782.606	434.235
487	4.86	770.412	1248.23	195.043	811.096	1238.14	120.53	830.114	1239.1	261.018	919.691	1058.37	24.8245	918.272	1082.63	361.303	840.588	1038.96	198.671	861.252	692.623	-115.49	645.549	792.462	-75.2674	661.09	804.466	1.24906	567.697	808.679	-12.5971	476.35	781.928	11.0915	854.785	708.303	519.976	619.821	796.175	513.566	634.249	798.105	430.341	544.766	823.165	459.386	443.621	782.685	434.314
488	4.87	770.299	1248.25	195.09	811.023	1238.14	120.59	830.111	1239.09	261.02	919.701	1058.4	24.8724	918.263	1082.64	361.345	840.546	1039	198.731	861.274	692.682	-115.448	645.562	792.484	-75.2191	661.065	804.508	1.307	567.689	808.72	-12.5439	476.313	781.97	11.1334	854.772	708.291	519.991	619.813	796.172	513.582	634.289	798.133	430.388	544.764	823.197	459.424	443.584	782.722	434.357
489	4.88	770.219	1248.23	195.042	811.018	1238.09	120.537	830.06	1239.04	260.997	919.701	1058.39	24.855	918.272	1082.62	361.332	840.55	1038.97	198.689	861.317	692.652	-115.492	645.577	792.467	-75.2648	661.079	804.491	1.25789	567.702	808.717	-12.5942	476.308	781.965	11.1099	854.75	708.271	519.974	619.831	796.179	513.601	634.3	798.132	430.383	544.761	823.182	459.414	443.594	782.707	434.317
490	4.89	770.393	1248.07	194.918	811.039	1238.01	120.416	830.01	1239	260.959	919.7	1058.36	24.7887	918.272	1082.56	361.276	840.666	1038.85	198.601	861.374	692.593	-115.582	645.632	792.412	-75.3646	661.13	804.435	1.17449	567.764	808.668	-12.696	476.344	781.912	11.0296	854.78	708.262	519.974	619.834	796.169	513.593	634.309	798.082	430.336	544.785	823.152	459.37	443.627	782.649	434.259
491	4.9	770.403	1247.92	194.896	811.09	1237.92	120.37	829.956	1238.98	260.954	919.713	1058.32	24.7701	918.267	1082.52	361.247	840.751	1038.75	198.558	861.419	692.514	-115.616	645.666	792.345	-75.392	661.165	804.384	1.1549	567.825	808.592	-12.7172	476.384	781.851	11.0009	854.787	708.266	519.979	619.85	796.168	513.579	634.273	798.029	430.284	544.784	823.106	459.344	443.64	782.594	434.235
492	4.91	770.325	1247.85	194.941	811.096	1237.87	120.412	829.923	1238.97	260.993	919.731	1058.31	24.7936	918.259	1082.5	361.274	840.724	1038.72	198.586	861.402	692.468	-115.579	645.702	792.3	-75.34	661.191	804.345	1.17873	567.864	808.554	-12.6827	476.422	781.831	11.0208	854.795	708.274	519.999	619.841	796.159	513.593	634.214	798.01	430.267	544.765	823.076	459.365	443.629	782.553	434.241
493	4.92	770.3	1247.77	194.956	811.034	1237.83	120.451	829.857	1238.94	261.018	919.713	1058.32	24.7914	918.231	1082.5	361.275	840.75	1038.68	198.593	861.39	692.472	-115.568	645.685	792.295	-75.3365	661.17	804.33	1.17864	567.855	808.554	-12.6719	476.427	781.822	11.0293	854.769	708.265	520.003	619.79	796.14	513.609	634.197	798.004	430.278	544.733	823.064	459.376	443.597	782.539	434.255
494	4.93	770.257	1247.77	194.99	811.002	1237.83	120.454	829.782	1238.91	261.026	919.702	1058.34	24.7765	918.195	1082.48	361.265	840.802	1038.67	198.589	861.421	692.508	-115.6	645.66	792.317	-75.3414	661.171	804.321	1.18092	567.77	808.591	-12.6794	476.4	781.823	11.0368	854.719	708.233	519.984	619.806	796.158	513.606	634.2	798.017	430.27	544.727	823.068	459.354	443.612	782.558	434.25
495	4.94	770.323	1247.74	194.998	810.971	1237.87	120.486	829.773	1238.9	261.039	919.698	1058.38	24.7941	918.187	1082.5	361.282	840.774	1038.71	198.603	861.412	692.554	-115.591	645.659	792.34	-75.3176	661.172	804.356	1.2036	567.769	808.614	-12.6717	476.389	781.861	11.0489	854.69	708.24	519.983	619.846	796.191	513.598	634.129	798.068	430.259	544.739	823.116	459.362	443.634	782.597	434.265
496	4.95	770.168	1247.81	195.046	810.912	1237.91	120.548	829.76	1238.89	261.08	919.72	1058.43	24.8212	918.206	1082.53	361.302	840.625	1038.82	198.602	861.423	692.607	-115.536	645.636	792.402	-75.2875	661.15	804.424	1.22059	567.797	808.68	-12.6394	476.378	781.915	11.0838	854.715	708.271	519.991	619.833	796.204	513.588	634.147	798.121	430.296	544.738	823.174	459.374	443.644	782.651	434.302
497	4.96	769.915	1247.93	195.106	810.809	1237.96	120.569	829.707	1238.87	261.108	919.698	1058.46	24.8249	918.196	1082.54	361.298	840.48	1038.93	198.573	861.411	692.643	-115.52	645.607	792.465	-75.3093	661.114	804.478	1.22317	567.741	808.714	-12.6402	476.354	781.971	11.0938	854.736	708.251	519.976	619.81	796.204	513.581	634.245	798.146	430.349	544.741	823.226	459.372	443.613	782.721	434.3
498	4.97	769.843	1247.94	195.12	810.763	1237.98	120.58	829.723	1238.85	261.106	919.699	1058.46	24.8078	918.162	1082.52	361.273	840.501	1038.93	198.567	861.373	692.656	-115.534	645.566	792.475	-75.3235	661.105	804.498	1.19727	567.753	808.721	-12.669	476.338	781.98	11.0701	854.769	708.231	519.966	619.797	796.203	513.557	634.32	798.127	430.363	544.75	823.214	459.365	443.595	782.735	434.277
499	4.98	769.996	1247.82	195.107	810.784	1237.93	120.607	829.746	1238.8	261.123	919.733	1058.4	24.7975	918.18	1082.47	361.25	840.564	1038.87	198.581	861.394	692.599	-115.532	645.63	792.419	-75.3249	661.121	804.474	1.18262	567.765	808.695	-12.6825	476.346	781.949	11.0627	854.827	708.212	519.978	619.846	796.185	513.55	634.339	798.078	430.352	544.76	823.168	459.356	443.599	782.687	434.266
500	4.99	770.168	1247.67	195.128	810.805	1237.85	120.626	829.768	1238.75	261.167	919.74	1058.34	24.7962	918.204	1082.4	361.264	840.725	1038.7	198.595	861.44	692.51	-115.548	645.658	792.367	-75.3211	661.157	804.391	1.19191	567.794	808.615	-12.6839	476.384	781.849	11.0555	854.847	708.162	520.001	619.885	796.151	513.569	634.321	797.997	430.324	544.776	823.083	459.36	443.619	782.614	434.262
501	5	770.234	1247.55	195.199	810.763	1237.78	120.665	829.74	1238.72	261.21	919.714	1058.28	24.7939	918.162	1082.35	361.279	840.912	1038.52	198.607	861.422	692.456	-115.575	645.655	792.298	-75.3269	661.174	804.316	1.18634	567.799	808.525	-12.6687	476.455	781.773	11.0274	854.793	708.106	519.983	619.867	796.118	513.593	634.293	797.941	430.299	544.753	823.012	459.364	443.64	782.539	434.268
502	5.01	770.185	1247.51	195.265	810.706	1237.75	120.697	829.735	1238.72	261.25	919.681	1058.26	24.806	918.134	1082.3	361.291	840.939	1038.44	198.629	861.393	692.447	-115.594	645.646	792.266	-75.3088	661.182	804.283	1.19406	567.806	808.491	-12.6437	476.427	781.764	11.0402	854.767	708.09	519.972	619.803	796.096	513.592	634.212	797.912	430.261	544.734	822.99	459.373	443.658	782.503	434.278
503	5.02	770.19	1247.49	195.258	810.719	1237.74	120.718	829.739	1238.72	261.266	919.658	1058.28	24.8079	918.159	1082.28	361.282	840.896	1038.45	198.629	861.394	692.443	-115.604	645.668	792.275	-75.3067	661.202	804.283	1.20081	567.813	808.494	-12.6607	476.4	781.764	11.0684	854.776	708.093	519.964	619.788	796.112	513.591	634.168	797.931	430.231	544.73	823	459.358	443.679	782.501	434.266
504	5.03	770.144	1247.54	195.288	810.683	1237.78	120.711	829.668	1238.73	261.267	919.647	1058.34	24.8027	918.182	1082.32	361.257	840.884	1038.5	198.59	861.387	692.477	-115.612	645.716	792.293	-75.3617	661.229	804.326	1.17333	567.847	808.544	-12.6719	476.403	781.804	11.0453	854.768	708.107	519.964	619.798	796.149	513.574	634.18	797.996	430.228	544.735	823.055	459.342	443.658	782.554	434.251
505	5.04	769.97	1247.68	195.307	810.59	1237.88	120.715	829.618	1238.77	261.28	919.626	1058.43	24.8159	918.158	1082.39	361.264	840.726	1038.67	198.592	861.388	692.575	-115.588	645.665	792.387	-75.3569	661.178	804.42	1.16694	567.773	808.656	-12.6828	476.351	781.909	11.0439	854.73	708.107	519.931	619.819	796.212	513.569	634.238	798.094	430.284	544.749	823.177	459.358	443.631	782.66	434.248
506	5.05	769.729	1247.83	195.364	810.465	1237.96	120.792	829.612	1238.78	261.286	919.596	1058.5	24.8461	918.084	1082.48	361.304	840.446	1038.91	198.632	861.312	692.722	-115.527	645.555	792.508	-75.309	661.061	804.536	1.21923	567.673	808.78	-12.6492	476.281	782.012	11.0716	854.732	708.125	519.907	619.805	796.247	513.571	634.25	798.189	430.353	544.754	823.294	459.379	443.577	782.77	434.274
507	5.06	769.677	1247.88	195.421	810.393	1237.99	120.866	829.605	1238.76	261.304	919.596	1058.53	24.8672	918.071	1082.5	361.339	840.352	1038.99	198.683	861.324	692.801	-115.487	645.513	792.568	-75.2751	661.044	804.572	1.25848	567.66	808.817	-12.6238	476.288	782.072	11.1201	854.765	708.113	519.915	619.824	796.246	513.572	634.282	798.218	430.381	544.789	823.32	459.398	443.577	782.808	434.295
508	5.07	769.731	1247.77	195.44	810.373	1237.95	120.879	829.584	1238.73	261.331	919.62	1058.51	24.8737	918.087	1082.46	361.341	840.504	1038.86	198.69	861.378	692.756	-115.482	645.569	792.533	-75.2671	661.124	804.531	1.24305	567.757	808.755	-12.6213	476.385	782.007	11.1142	854.804	708.1	519.93	619.842	796.226	513.578	634.292	798.18	430.373	544.808	823.262	459.405	443.611	782.772	434.302
509	5.08	769.814	1247.58	195.436	810.392	1237.84	120.853	829.539	1238.68	261.351	919.606	1058.42	24.8692	918.076	1082.36	361.339	840.619	1038.66	198.661	861.371	692.621	-115.548	645.607	792.423	-75.2937	661.144	804.436	1.20327	567.765	808.667	-12.6564	476.403	781.901	11.0691	854.806	708.059	519.929	619.865	796.199	513.594	634.273	798.076	430.33	544.791	823.151	459.374	443.625	782.658	434.279
510	5.09	769.994	1247.37	195.405	810.404	1237.71	120.828	829.51	1238.63	261.363	919.551	1058.32	24.8473	918.088	1082.26	361.305	840.799	1038.45	198.626	861.354	692.485	-115.605	645.653	792.296	-75.3387	661.173	804.321	1.1766	567.795	808.565	-12.679	476.391	781.802	11.0374	854.795	708.027	519.936	619.861	796.159	513.603	634.221	797.946	430.253	544.764	823.035	459.36	443.634	782.532	434.244
511	5.1	770.021	1247.23	195.4	810.436	1237.61	120.787	829.48	1238.59	261.383	919.553	1058.27	24.8169	918.095	1082.19	361.289	840.942	1038.28	198.616	861.405	692.363	-115.641	645.72	792.206	-75.3821	661.241	804.229	1.15125	567.858	808.477	-12.7425	476.447	781.742	11.0125	854.813	708.016	519.941	619.863	796.132	513.59	634.199	797.866	430.203	544.769	822.961	459.338	443.653	782.455	434.215
512	5.11	769.936	1247.2	195.435	810.389	1237.57	120.793	829.468	1238.56	261.404	919.527	1058.25	24.8107	918.071	1082.19	361.299	840.942	1038.25	198.607	861.437	692.322	-115.638	645.726	792.204	-75.3985	661.249	804.218	1.14722	567.877	808.441	-12.7378	476.488	781.729	11.009	854.835	708	519.946	619.825	796.125	513.589	634.164	797.858	430.19	544.735	822.95	459.318	443.645	782.454	434.217
513	5.12	769.742	1247.22	195.466	810.255	1237.6	120.842	829.405	1238.54	261.395	919.474	1058.29	24.8266	918.027	1082.22	361.312	840.728	1038.35	198.655	861.398	692.391	-115.596	645.625	792.275	-75.3543	661.18	804.27	1.17677	567.802	808.537	-12.6807	476.413	781.79	11.0514	854.812	708.002	519.939	619.8	796.134	513.603	634.156	797.928	430.228	544.707	823.001	459.333	443.626	782.532	434.236
514	5.13	769.501	1247.32	195.517	810.11	1237.65	120.903	829.328	1238.51	261.386	919.465	1058.37	24.8513	917.968	1082.28	361.328	840.537	1038.5	198.698	861.37	692.542	-115.536	645.558	792.373	-75.2998	661.111	804.373	1.22806	567.756	808.605	-12.6606	476.386	781.855	11.0677	854.808	708.02	519.93	619.799	796.148	513.607	634.2	798.043	430.292	544.73	823.098	459.36	443.618	782.641	434.283
515	5.14	769.421	1247.37	195.555	810.039	1237.71	120.952	829.314	1238.51	261.394	919.458	1058.44	24.8822	917.942	1082.34	361.352	840.445	1038.64	198.72	861.425	692.668	-115.497	645.585	792.442	-75.2612	661.108	804.457	1.2781	567.743	808.666	-12.6335	476.376	781.944	11.102	854.816	708.03	519.944	619.811	796.16	513.604	634.269	798.158	430.356	544.751	823.196	459.393	443.615	782.731	434.317
516	5.15	769.363	1247.37	195.611	809.956	1237.72	120.989	829.3	1238.5	261.419	919.459	1058.49	24.9005	917.931	1082.37	361.402	840.337	1038.72	198.738	861.433	692.72	-115.475	645.576	792.491	-75.2342	661.12	804.5	1.30495	567.75	808.718	-12.6027	476.343	782.008	11.1359	854.795	708.026	519.952	619.803	796.178	513.601	634.293	798.225	430.388	544.791	823.261	459.437	443.606	782.78	434.343
517	5.16	769.246	1247.34	195.638	809.863	1237.69	120.996	829.265	1238.48	261.428	919.448	1058.48	24.9084	917.891	1082.36	361.409	840.387	1038.66	198.732	861.371	692.703	-115.48	645.562	792.494	-75.2464	661.088	804.506	1.29114	567.741	808.729	-12.6086	476.324	782.015	11.1294	854.776	708.002	519.951	619.807	796.189	513.589	634.279	798.21	430.392	544.792	823.265	459.437	443.583	782.782	434.335
518	5.17	769.292	1247.22	195.602	809.863	1237.6	120.954	829.216	1238.44	261.438	919.423	1058.44	24.8657	917.897	1082.3	361.351	840.482	1038.51	198.68	861.396	692.623	-115.553	645.645	792.41	-75.3149	661.14	804.44	1.21923	567.772	808.666	-12.6645	476.363	781.953	11.0887	854.766	707.982	519.946	619.831	796.193	513.587	634.263	798.134	430.344	544.799	823.202	459.385	443.625	782.709	434.288
519	5.18	769.433	1247.04	195.541	809.889	1237.5	120.89	829.191	1238.4	261.438	919.432	1058.37	24.8055	917.932	1082.22	361.302	840.645	1038.32	198.628	861.448	692.481	-115.629	645.704	792.325	-75.376	661.205	804.351	1.16069	567.848	808.576	-12.7171	476.407	781.859	11.0083	854.795	707.979	519.953	619.869	796.197	513.583	634.257	798.013	430.258	544.792	823.102	459.319	443.658	782.6	434.226
520	5.19	769.381	1246.94	195.541	809.816	1237.41	120.874	829.163	1238.37	261.429	919.401	1058.31	24.7799	917.912	1082.14	361.291	840.705	1038.2	198.584	861.46	692.386	-115.666	645.699	792.276	-75.4202	661.211	804.292	1.13256	567.871	808.531	-12.7339	476.448	781.783	10.9831	854.853	707.977	519.969	619.906	796.184	513.581	634.227	797.916	430.213	544.787	823.045	459.304	443.646	782.524	434.188
521	5.2	769.325	1246.89	195.531	809.744	1237.37	120.87	829.102	1238.33	261.428	919.349	1058.28	24.784	917.883	1082.13	361.294	840.638	1038.18	198.559	861.417	692.369	-115.673	645.67	792.264	-75.4218	661.188	804.272	1.12538	567.827	808.524	-12.757	476.435	781.775	10.9924	854.827	707.955	519.969	619.895	796.159	513.582	634.222	797.867	430.213	544.762	823.017	459.304	443.607	782.497	434.181
522	5.21	769.269	1246.86	195.555	809.665	1237.37	120.929	829.056	1238.29	261.429	919.32	1058.29	24.8175	917.854	1082.14	361.305	840.599	1038.18	198.6	861.389	692.388	-115.628	645.666	792.28	-75.3963	661.212	804.295	1.12591	567.808	808.53	-12.7511	476.405	781.803	10.9971	854.799	707.929	519.963	619.841	796.133	513.573	634.24	797.892	430.244	544.733	823.023	459.296	443.602	782.519	434.207
523	5.22	769.11	1246.92	195.648	809.567	1237.4	121.014	829.053	1238.28	261.457	919.306	1058.33	24.877	917.833	1082.17	361.342	840.53	1038.26	198.693	861.38	692.473	-115.568	645.65	792.355	-75.3279	661.17	804.367	1.2004	567.791	808.579	-12.6794	476.393	781.854	11.0533	854.818	707.929	519.98	619.834	796.117	513.586	634.281	797.99	430.316	544.749	823.072	459.35	443.626	782.591	434.26
524	5.23	769.029	1246.94	195.702	809.455	1237.46	121.075	829.053	1238.28	261.484	919.298	1058.37	24.9246	917.793	1082.2	361.392	840.445	1038.36	198.795	861.351	692.57	-115.514	645.604	792.431	-75.2672	661.117	804.439	1.28079	567.769	808.619	-12.5944	476.355	781.91	11.1347	854.804	707.92	520.009	619.806	796.116	513.595	634.301	798.089	430.38	544.774	823.118	459.411	443.606	782.663	434.322
525	5.24	769.061	1246.94	195.705	809.371	1237.48	121.077	829.019	1238.29	261.494	919.278	1058.41	24.9378	917.735	1082.22	361.413	840.384	1038.45	198.822	861.328	692.657	-115.516	645.591	792.465	-75.2596	661.085	804.479	1.28952	567.756	808.667	-12.5887	476.338	781.931	11.1466	854.763	707.906	520.021	619.767	796.117	513.595	634.323	798.157	430.404	544.785	823.162	459.438	443.611	782.711	434.346
526	5.25	768.992	1247	195.717	809.365	1237.48	121.056	828.992	1238.32	261.497	919.262	1058.44	24.9497	917.702	1082.26	361.42	840.369	1038.48	198.781	861.359	692.665	-115.535	645.589	792.479	-75.2671	661.088	804.495	1.27571	567.78	808.707	-12.5979	476.352	781.95	11.124	854.733	707.922	520.015	619.775	796.152	513.606	634.312	798.185	430.38	544.757	823.191	459.433	443.639	782.721	434.333
527	5.26	768.983	1246.98	195.683	809.359	1237.48	121.049	828.946	1238.33	261.465	919.238	1058.43	24.932	917.683	1082.27	361.408	840.328	1038.44	198.737	861.377	692.619	-115.55	645.575	792.48	-75.276	661.109	804.479	1.25602	567.76	808.701	-12.6313	476.343	781.967	11.1125	854.756	707.958	520.007	619.798	796.185	513.599	634.226	798.167	430.346	544.767	823.192	459.406	443.632	782.724	434.315
528	5.27	768.994	1246.96	195.603	809.392	1237.44	120.989	828.904	1238.33	261.435	919.202	1058.39	24.8901	917.706	1082.23	361.37	840.365	1038.36	198.685	861.375	692.544	-115.589	645.565	792.439	-75.3129	661.139	804.428	1.19678	567.749	808.67	-12.699	476.361	781.92	11.0542	854.802	707.971	520.007	619.813	796.201	513.588	634.165	798.092	430.296	544.763	823.155	459.354	443.614	782.676	434.254
529	5.28	769.038	1246.9	195.53	809.419	1237.38	120.909	828.882	1238.32	261.423	919.166	1058.34	24.838	917.7	1082.17	361.334	840.41	1038.27	198.616	861.395	692.455	-115.66	645.593	792.364	-75.3848	661.183	804.36	1.11584	567.743	808.618	-12.7698	476.389	781.851	11.0041	854.788	707.92	519.971	619.821	796.184	513.589	634.172	798.01	430.255	544.724	823.097	459.291	443.619	782.599	434.191
530	5.29	769.058	1246.85	195.545	809.429	1237.33	120.897	828.919	1238.32	261.44	919.148	1058.29	24.8437	917.7	1082.1	361.339	840.451	1038.21	198.634	861.371	692.397	-115.657	645.622	792.309	-75.4045	661.178	804.313	1.10982	567.771	808.571	-12.7573	476.4	781.809	11.0096	854.802	707.88	519.971	619.829	796.158	513.594	634.186	797.947	430.25	544.746	823.053	459.304	443.626	782.547	434.185
531	5.3	769.06	1246.84	195.611	809.437	1237.32	120.932	828.98	1238.32	261.463	919.158	1058.27	24.8769	917.718	1082.09	361.366	840.478	1038.17	198.706	861.328	692.382	-115.631	645.647	792.284	-75.3661	661.164	804.299	1.17224	567.791	808.533	-12.7199	476.418	781.803	11.0162	854.82	707.841	519.987	619.887	796.132	513.597	634.2	797.921	430.265	544.799	823.024	459.355	443.628	782.535	434.228
532	5.31	769.039	1246.9	195.626	809.418	1237.34	120.939	828.998	1238.3	261.466	919.168	1058.28	24.8919	917.739	1082.09	361.38	840.49	1038.19	198.719	861.365	692.411	-115.626	645.674	792.308	-75.3487	661.193	804.315	1.17573	567.816	808.553	-12.7176	476.409	781.803	11.0211	854.816	707.821	519.994	619.884	796.113	513.607	634.306	797.942	430.296	544.842	823.03	459.377	443.647	782.569	434.253
533	5.32	769.061	1246.96	195.616	809.436	1237.4	120.935	828.988	1238.31	261.45	919.147	1058.3	24.9095	917.706	1082.13	361.401	840.468	1038.26	198.76	861.383	692.478	-115.592	645.642	792.357	-75.3373	661.191	804.357	1.19027	567.802	808.601	-12.6881	476.365	781.852	11.0554	854.795	707.82	519.985	619.83	796.117	513.601	634.365	798.011	430.336	544.857	823.076	459.391	443.655	782.617	434.269
534	5.33	768.933	1247.08	195.658	809.414	1237.49	120.974	828.979	1238.36	261.45	919.108	1058.36	24.9447	917.624	1082.19	361.428	840.367	1038.37	198.822	861.355	692.548	-115.54	645.606	792.413	-75.303	661.136	804.423	1.23939	567.755	808.648	-12.6276	476.318	781.932	11.109	854.797	707.869	519.988	619.816	796.147	513.6	634.309	798.094	430.377	544.816	823.145	459.402	443.635	782.679	434.3
535	5.34	768.907	1247.17	195.675	809.409	1237.54	121.02	828.957	1238.39	261.458	919.118	1058.4	24.9694	917.604	1082.23	361.447	840.259	1038.45	198.847	861.347	692.585	-115.512	645.587	792.453	-75.2496	661.104	804.465	1.27351	567.776	808.665	-12.6115	476.315	781.958	11.1364	854.817	707.92	520.004	619.809	796.167	513.607	634.263	798.141	430.371	544.78	823.19	459.416	443.629	782.717	434.336
536	5.35	768.97	1247.15	195.621	809.49	1237.54	120.992	828.93	1238.4	261.444	919.102	1058.41	24.9593	917.615	1082.24	361.434	840.258	1038.46	198.809	861.35	692.603	-115.515	645.587	792.463	-75.2778	661.107	804.457	1.24224	567.791	808.669	-12.6422	476.366	781.931	11.1077	854.74	707.924	520.011	619.786	796.182	513.621	634.226	798.152	430.349	544.775	823.204	459.399	443.623	782.717	434.31
537	5.36	769.049	1247.12	195.599	809.509	1237.51	120.955	828.931	1238.42	261.418	919.061	1058.38	24.9453	917.617	1082.21	361.432	840.311	1038.39	198.77	861.336	692.562	-115.527	645.591	792.434	-75.3099	661.117	804.424	1.22574	567.759	808.649	-12.6692	476.375	781.884	11.1092	854.721	707.908	520.018	619.748	796.171	513.619	634.172	798.13	430.322	544.712	823.172	459.364	443.599	782.668	434.261
538	5.37	769.102	1247.08	195.584	809.541	1237.49	120.956	828.945	1238.42	261.427	919.067	1058.33	24.9564	917.613	1082.17	361.424	840.417	1038.31	198.78	861.341	692.49	-115.555	645.6	792.377	-75.2856	661.119	804.389	1.22991	567.77	808.59	-12.6621	476.377	781.835	11.0965	854.726	707.894	520.012	619.746	796.16	513.619	634.143	798.078	430.293	544.677	823.108	459.352	443.596	782.618	434.253
539	5.38	769.17	1247.02	195.589	809.627	1237.47	120.958	829	1238.41	261.449	919.097	1058.29	24.9513	917.618	1082.12	361.431	840.519	1038.22	198.797	861.344	692.444	-115.615	645.649	792.325	-75.3035	661.169	804.356	1.21184	567.801	808.521	-12.6412	476.399	781.809	11.0949	854.754	707.877	520.031	619.791	796.134	513.629	634.186	798.008	430.287	544.699	823.061	459.372	443.655	782.579	434.271
540	5.39	769.324	1246.96	195.566	809.69	1237.45	120.936	829.053	1238.4	261.459	919.129	1058.25	24.9336	917.626	1082.08	361.402	840.567	1038.16	198.776	861.322	692.403	-115.621	645.689	792.295	-75.3339	661.218	804.319	1.19261	567.807	808.499	-12.656	476.417	781.782	11.076	854.78	707.839	520.043	619.816	796.111	513.619	634.252	797.951	430.294	544.762	823.03	459.373	443.68	782.555	434.27
541	5.4	769.405	1246.99	195.538	809.71	1237.48	120.92	829.098	1238.41	261.445	919.141	1058.23	24.9143	917.649	1082.06	361.386	840.576	1038.18	198.759	861.324	692.39	-115.603	645.657	792.286	-75.3413	661.187	804.322	1.19849	567.846	808.51	-12.6918	476.43	781.797	11.0427	854.764	707.799	520.012	619.815	796.106	513.603	634.277	797.928	430.291	544.783	823.015	459.342	443.665	782.549	434.236
542	5.41	769.364	1247.11	195.537	809.72	1237.53	120.912	829.14	1238.41	261.43	919.159	1058.24	24.9074	917.654	1082.09	361.376	840.551	1038.26	198.741	861.346	692.402	-115.576	645.639	792.326	-75.3394	661.172	804.347	1.19374	567.87	808.566	-12.702	476.414	781.847	11.0452	854.791	707.806	519.993	619.869	796.132	513.605	634.316	797.945	430.305	544.807	823.05	459.334	443.63	782.582	434.239
543	5.42	769.342	1247.19	195.53	809.743	1237.62	120.921	829.157	1238.44	261.414	919.169	1058.29	24.9117	917.674	1082.15	361.357	840.393	1038.43	198.726	861.362	692.446	-115.559	645.607	792.383	-75.3406	661.151	804.405	1.18355	567.847	808.642	-12.7082	476.391	781.92	11.0451	854.832	707.862	519.996	619.88	796.168	513.597	634.361	798.004	430.344	544.845	823.117	459.346	443.616	782.633	434.237
544	5.43	769.262	1247.31	195.556	809.712	1237.7	120.945	829.154	1238.48	261.411	919.121	1058.33	24.9063	917.663	1082.19	361.368	840.262	1038.57	198.745	861.358	692.505	-115.522	645.576	792.432	-75.3352	661.091	804.464	1.19992	567.746	808.687	-12.7022	476.354	781.955	11.0562	854.785	707.887	519.998	619.824	796.172	513.586	634.333	798.072	430.372	544.802	823.157	459.352	443.578	782.702	434.261
545	5.44	769.221	1247.36	195.573	809.701	1237.72	120.962	829.167	1238.5	261.417	919.114	1058.35	24.9244	917.643	1082.23	361.392	840.226	1038.59	198.758	861.348	692.53	-115.495	645.562	792.447	-75.3168	661.071	804.477	1.22983	567.702	808.677	-12.667	476.346	781.957	11.0786	854.723	707.889	519.997	619.789	796.162	513.599	634.271	798.14	430.383	544.74	823.181	459.367	443.565	782.733	434.278
546	5.45	769.396	1247.31	195.579	809.762	1237.69	120.961	829.164	1238.52	261.428	919.141	1058.35	24.9425	917.662	1082.23	361.377	840.349	1038.49	198.804	861.368	692.493	-115.512	645.599	792.423	-75.3206	661.094	804.454	1.23988	567.725	808.644	-12.635	476.39	781.923	11.0932	854.691	707.901	520.013	619.756	796.156	513.605	634.225	798.155	430.371	544.763	823.17	459.386	443.617	782.708	434.306
547	5.46	769.511	1247.28	195.603	809.848	1237.65	120.955	829.196	1238.51	261.436	919.15	1058.3	24.9316	917.682	1082.2	361.36	840.486	1038.38	198.842	861.386	692.431	-115.563	645.638	792.376	-75.3112	661.148	804.412	1.22233	567.78	808.606	-12.6215	476.404	781.857	11.0833	854.708	707.919	520.037	619.776	796.149	513.631	634.102	798.236	430.195	544.783	823.128	459.397	443.667	782.648	434.302
548	5.47	769.535	1247.26	195.576	809.898	1237.63	120.929	829.246	1238.52	261.432	919.149	1058.23	24.9017	917.681	1082.17	361.339	840.582	1038.3	198.817	861.36	692.358	-115.599	645.676	792.332	-75.325	661.153	804.356	1.18938	567.801	808.57	-12.6596	476.409	781.818	11.0482	854.723	707.935	520.049	619.789	796.144	513.64	633.922	798.317	429.969	544.783	823.087	459.379	443.692	782.594	434.264
549	5.48	769.617	1247.26	195.514	809.969	1237.62	120.871	829.316	1238.56	261.406	919.148	1058.17	24.8784	917.737	1082.15	361.321	840.622	1038.26	198.775	861.373	692.316	-115.602	645.691	792.293	-75.357	661.189	804.326	1.16471	567.834	808.549	-12.6734	476.413	781.81	11.0175	854.755	707.939	520.054	619.804	796.129	513.622	634.138	798.062	430.195	544.792	823.049	459.354	443.667	782.557	434.243
550	5.49	769.671	1247.32	195.487	810.03	1237.63	120.853	829.365	1238.57	261.375	919.168	1058.14	24.8754	917.768	1082.15	361.324	840.639	1038.24	198.742	861.422	692.28	-115.608	645.682	792.274	-75.3593	661.199	804.323	1.17594	567.834	808.522	-12.6941	476.419	781.823	11.0115	854.811	707.931	520.043	619.853	796.125	513.598	634.224	797.977	430.263	544.829	823.046	459.357	443.652	782.56	434.249
551	5.5	769.685	1247.39	195.507	810.023	1237.67	120.851	829.399	1238.59	261.353	919.179	1058.13	24.8847	917.793	1082.19	361.342	840.466	1038.31	198.757	861.395	692.292	-115.608	645.657	792.313	-75.3496	661.178	804.342	1.19098	567.821	808.56	-12.6965	476.411	781.855	11.0445	854.851	707.956	520.037	619.89	796.135	513.603	634.296	797.976	430.317	544.858	823.065	459.371	443.644	782.597	434.273
552	5.51	769.68	1247.46	195.492	809.999	1237.7	120.854	829.444	1238.63	261.34	919.154	1058.15	24.8961	917.799	1082.21	361.361	840.393	1038.36	198.787	861.369	692.322	-115.562	645.615	792.365	-75.3321	661.131	804.398	1.20304	567.746	808.61	-12.6656	476.381	781.891	11.0588	854.81	707.949	520.038	619.875	796.127	513.609	634.322	797.995	430.359	544.835	823.089	459.379	443.616	782.634	434.285
553	5.52	769.643	1247.51	195.449	810.011	1237.74	120.833	829.441	1238.67	261.316	919.139	1058.17	24.8994	917.833	1082.23	361.366	840.373	1038.41	198.786	861.363	692.378	-115.55	645.614	792.389	-75.3343	661.119	804.418	1.20022	567.738	808.635	-12.663	476.369	781.898	11.05	854.771	707.949	520.05	619.842	796.126	513.595	634.312	798.03	430.348	544.773	823.117	459.373	443.637	782.656	434.279
554	5.53	769.615	1247.57	195.413	810.085	1237.75	120.782	829.451	1238.71	261.282	919.147	1058.2	24.8987	917.837	1082.26	361.371	840.383	1038.45	198.801	861.39	692.402	-115.533	645.648	792.398	-75.3296	661.141	804.439	1.19921	567.807	808.656	-12.6743	476.391	781.91	11.0553	854.756	707.963	520.045	619.824	796.144	513.602	634.319	798.084	430.346	544.785	823.138	459.372	443.659	782.687	434.274
555	5.54	769.613	1247.63	195.38	810.138	1237.77	120.756	829.429	1238.72	261.246	919.153	1058.22	24.9076	917.81	1082.28	361.372	840.36	1038.45	198.82	861.373	692.416	-115.521	645.613	792.412	-75.2995	661.142	804.455	1.22311	567.767	808.659	-12.6521	476.378	781.934	11.0723	854.762	707.983	520.042	619.825	796.165	513.612	634.279	798.109	430.357	544.777	823.164	459.38	443.638	782.679	434.275
556	5.55	769.66	1247.65	195.347	810.164	1237.77	120.729	829.435	1238.74	261.242	919.163	1058.23	24.9096	917.83	1082.28	361.374	840.401	1038.46	198.797	861.367	692.427	-115.53	645.607	792.406	-75.2988	661.141	804.446	1.22011	567.76	808.667	-12.6695	476.345	781.933	11.0902	854.763	707.986	520.039	619.828	796.177	513.622	634.241	798.095	430.332	544.74	823.16	459.37	443.636	782.656	434.27
557	5.56	769.825	1247.6	195.275	810.268	1237.73	120.664	829.453	1238.73	261.207	919.193	1058.23	24.8808	917.839	1082.26	361.35	840.508	1038.42	198.738	861.422	692.41	-115.567	645.643	792.381	-75.325	661.198	804.42	1.17539	567.801	808.662	-12.6972	476.414	781.888	11.0477	854.763	707.979	520.011	619.847	796.187	513.609	634.213	798.068	430.289	544.758	823.156	459.336	443.649	782.644	434.233
558	5.57	769.94	1247.55	195.202	810.327	1237.73	120.623	829.474	1238.72	261.163	919.241	1058.22	24.853	917.839	1082.23	361.317	840.603	1038.37	198.698	861.449	692.364	-115.592	645.653	792.367	-75.336	661.216	804.392	1.16382	567.823	808.632	-12.7078	476.465	781.865	11.0063	854.819	707.965	520.007	619.862	796.175	513.611	634.207	798.042	430.26	544.795	823.12	459.327	443.653	782.631	434.217
559	5.58	769.887	1247.57	195.199	810.349	1237.73	120.615	829.522	1238.73	261.169	919.294	1058.21	24.8531	917.847	1082.19	361.319	840.594	1038.34	198.694	861.443	692.339	-115.592	645.642	792.354	-75.3221	661.196	804.378	1.18136	567.786	808.612	-12.699	476.418	781.856	11.0089	854.846	707.956	520.003	619.87	796.156	513.605	634.217	798.018	430.275	544.777	823.083	459.345	443.646	782.627	434.249
560	5.59	769.848	1247.59	195.228	810.422	1237.72	120.603	829.531	1238.71	261.175	919.336	1058.19	24.8627	917.893	1082.17	361.34	840.623	1038.33	198.701	861.463	692.334	-115.572	645.664	792.345	-75.3061	661.178	804.372	1.20549	567.79	808.599	-12.6837	476.437	781.856	11.0243	854.852	707.925	519.991	619.883	796.139	513.599	634.266	798	430.309	544.802	823.075	459.386	443.661	782.623	434.266
561	5.6	769.908	1247.62	195.223	810.427	1237.73	120.62	829.554	1238.69	261.188	919.36	1058.17	24.8754	917.904	1082.15	361.33	840.683	1038.32	198.719	861.486	692.332	-115.559	645.701	792.346	-75.3237	661.213	804.362	1.20836	567.811	808.584	-12.6835	476.469	781.838	11.0319	854.82	707.886	519.973	619.899	796.115	513.601	634.344	797.997	430.331	544.816	823.063	459.395	443.668	782.613	434.28
562	5.61	769.962	1247.61	195.196	810.414	1237.75	120.64	829.565	1238.68	261.176	919.388	1058.17	24.8706	917.891	1082.13	361.317	840.682	1038.33	198.735	861.478	692.353	-115.548	645.694	792.344	-75.3191	661.221	804.352	1.20908	567.847	808.563	-12.6836	476.426	781.826	11.0519	854.796	707.871	519.973	619.877	796.104	513.598	634.208	798.115	430.172	544.806	823.056	459.391	443.651	782.621	434.286
563	5.62	769.978	1247.6	195.237	810.44	1237.75	120.672	829.566	1238.67	261.176	919.4	1058.19	24.8735	917.899	1082.13	361.332	840.643	1038.33	198.749	861.436	692.379	-115.519	645.675	792.365	-75.3045	661.179	804.349	1.23574	567.821	808.569	-12.6363	476.394	781.851	11.0593	854.753	707.861	519.975	619.842	796.106	513.593	634.009	798.277	429.963	544.798	823.067	459.403	443.648	782.622	434.298
564	5.63	770.002	1247.62	195.286	810.459	1237.78	120.713	829.57	1238.68	261.202	919.427	1058.21	24.9003	917.913	1082.13	361.336	840.634	1038.34	198.778	861.422	692.387	-115.52	645.653	792.387	-75.28	661.16	804.372	1.25772	567.81	808.596	-12.6119	476.384	781.879	11.0741	854.759	707.9	519.997	619.808	796.136	513.611	634.213	798.106	430.238	544.789	823.095	459.424	443.659	782.64	434.31
565	5.64	770.031	1247.65	195.281	810.46	1237.81	120.725	829.573	1238.7	261.215	919.42	1058.21	24.8919	917.926	1082.15	361.315	840.61	1038.36	198.744	861.444	692.359	-115.542	645.633	792.402	-75.2808	661.159	804.397	1.23879	567.753	808.63	-12.6548	476.384	781.908	11.0595	854.773	707.927	519.978	619.826	796.19	513.622	634.196	798.059	430.278	544.75	823.136	459.396	443.601	782.637	434.276
566	5.65	770.021	1247.65	195.234	810.46	1237.8	120.695	829.614	1238.72	261.194	919.431	1058.21	24.8408	917.946	1082.16	361.284	840.656	1038.34	198.672	861.453	692.343	-115.573	645.621	792.391	-75.3413	661.152	804.397	1.18015	567.761	808.634	-12.7081	476.392	781.9	11.0229	854.799	707.95	519.95	619.868	796.223	513.596	634.127	798.056	430.25	544.748	823.15	459.349	443.589	782.621	434.225
567	5.66	770.013	1247.67	195.221	810.506	1237.79	120.665	829.664	1238.73	261.19	919.449	1058.21	24.7918	917.946	1082.15	361.249	840.729	1038.33	198.603	861.442	692.333	-115.625	645.665	792.374	-75.4128	661.211	804.381	1.12636	567.861	808.626	-12.7729	476.449	781.897	10.9707	854.808	707.968	519.94	619.864	796.229	513.574	634.131	798.046	430.218	544.751	823.151	459.318	443.631	782.609	434.2
568	5.67	770.075	1247.68	195.251	810.571	1237.8	120.671	829.681	1238.74	261.209	919.483	1058.21	24.778	918.001	1082.16	361.253	840.751	1038.35	198.615	861.419	692.36	-115.64	645.715	792.364	-75.4046	661.245	804.394	1.1474	567.916	808.644	-12.7578	476.48	781.924	10.9731	854.81	707.957	519.935	619.864	796.231	513.582	634.2	798.055	430.227	544.791	823.157	459.325	443.665	782.625	434.218
569	5.68	770.106	1247.67	195.301	810.529	1237.84	120.747	829.698	1238.72	261.244	919.497	1058.23	24.8074	917.998	1082.17	361.285	840.666	1038.41	198.685	861.422	692.431	-115.573	645.658	792.411	-75.3348	661.205	804.42	1.2043	567.848	808.658	-12.6906	476.433	781.95	11.0394	854.77	707.899	519.921	619.867	796.21	513.592	634.229	798.106	430.272	544.807	823.189	459.374	443.651	782.666	434.256
570	5.69	770.087	1247.66	195.345	810.463	1237.85	120.794	829.713	1238.71	261.267	919.507	1058.23	24.8398	918.009	1082.17	361.311	840.645	1038.43	198.728	861.387	692.468	-115.501	645.632	792.435	-75.2931	661.204	804.432	1.22523	567.839	808.654	-12.6393	476.425	781.954	11.0606	854.752	707.863	519.902	619.865	796.181	513.593	634.262	798.119	430.305	544.824	823.189	459.412	443.636	782.683	434.286
571	5.7	770.059	1247.64	195.355	810.471	1237.84	120.779	829.75	1238.68	261.272	919.511	1058.21	24.8377	918.063	1082.15	361.3	840.724	1038.39	198.735	861.388	692.461	-115.532	645.686	792.413	-75.3145	661.203	804.424	1.21526	567.834	808.647	-12.6529	476.445	781.928	11.0451	854.791	707.839	519.906	619.865	796.15	513.582	634.294	798.073	430.304	544.845	823.146	459.419	443.67	782.671	434.282
572	5.71	770.083	1247.6	195.368	810.474	1237.81	120.775	829.789	1238.66	261.285	919.524	1058.19	24.8281	918.091	1082.12	361.294	840.728	1038.33	198.713	861.429	692.383	-115.546	645.703	792.383	-75.3288	661.221	804.385	1.20892	567.794	808.635	-12.6857	476.446	781.905	11.0464	854.808	707.811	519.901	619.897	796.139	513.584	634.351	798.015	430.312	544.866	823.118	459.411	443.656	782.642	434.287
573	5.72	769.996	1247.6	195.381	810.441	1237.78	120.774	829.759	1238.63	261.279	919.51	1058.16	24.8243	918.089	1082.09	361.277	840.679	1038.32	198.689	861.434	692.289	-115.531	645.68	792.35	-75.3346	661.223	804.35	1.20264	567.776	808.617	-12.6622	476.45	781.881	11.0504	854.82	707.837	519.899	619.918	796.144	513.587	634.339	797.979	430.319	544.812	823.085	459.392	443.617	782.618	434.278
574	5.73	770.039	1247.55	195.368	810.414	1237.75	120.748	829.743	1238.63	261.25	919.508	1058.13	24.8125	918.041	1082.08	361.256	840.663	1038.27	198.667	861.41	692.244	-115.558	645.643	792.324	-75.3459	661.223	804.343	1.18179	567.767	808.586	-12.668	476.428	781.856	11.0445	854.832	707.85	519.891	619.905	796.142	513.585	634.321	797.967	430.294	544.789	823.054	459.371	443.611	782.599	434.268
575	5.74	770.113	1247.51	195.33	810.453	1237.73	120.723	829.72	1238.61	261.223	919.496	1058.12	24.7986	918.059	1082.07	361.236	840.781	1038.23	198.672	861.391	692.258	-115.596	645.691	792.32	-75.3601	661.244	804.338	1.17082	567.813	808.569	-12.7045	476.471	781.823	11.023	854.874	707.843	519.904	619.907	796.138	513.585	634.309	797.956	430.274	544.847	823.045	459.376	443.665	782.59	434.255
576	5.75	770.097	1247.54	195.29	810.469	1237.72	120.694	829.712	1238.63	261.216	919.469	1058.12	24.7942	918.05	1082.09	361.235	840.786	1038.23	198.665	861.431	692.282	-115.604	645.737	792.306	-75.3395	661.266	804.337	1.18868	567.864	808.567	-12.6882	476.469	781.827	11.0338	854.893	707.848	519.917	619.939	796.144	513.592	634.289	797.971	430.268	544.871	823.05	459.381	443.674	782.598	434.244
577	5.76	770.01	1247.55	195.286	810.44	1237.71	120.693	829.685	1238.64	261.203	919.432	1058.14	24.7859	918.018	1082.12	361.239	840.747	1038.25	198.673	861.465	692.276	-115.574	645.714	792.317	-75.3339	661.25	804.366	1.20968	567.87	808.583	-12.6752	476.421	781.866	11.0679	854.875	707.862	519.917	619.93	796.156	513.586	634.261	797.99	430.278	544.845	823.065	459.388	443.665	782.604	434.258
578	5.77	769.926	1247.58	195.279	810.409	1237.74	120.671	829.587	1238.65	261.177	919.421	1058.18	24.7843	918.012	1082.15	361.242	840.703	1038.28	198.683	861.441	692.308	-115.579	645.68	792.355	-75.3559	661.238	804.393	1.18289	567.854	808.609	-12.6724	476.413	781.881	11.0672	854.843	707.866	519.901	619.898	796.166	513.572	634.251	798.026	430.277	544.839	823.109	459.38	443.672	782.653	434.27
579	5.78	769.891	1247.61	195.23	810.339	1237.77	120.63	829.536	1238.68	261.15	919.413	1058.2	24.7728	917.97	1082.19	361.249	840.628	1038.35	198.637	861.42	692.346	-115.591	645.654	792.38	-75.3669	661.209	804.434	1.16325	567.818	808.649	-12.7004	476.423	781.912	11.039	854.834	707.892	519.896	619.903	796.196	513.569	634.273	798.059	430.286	544.845	823.155	459.364	443.663	782.69	434.251
580	5.79	769.829	1247.65	195.201	810.258	1237.79	120.623	829.526	1238.7	261.145	919.377	1058.22	24.7746	917.918	1082.21	361.254	840.524	1038.41	198.604	861.399	692.36	-115.571	645.615	792.409	-75.3599	661.166	804.462	1.15673	567.773	808.662	-12.7222	476.379	781.964	11.0329	854.834	707.931	519.894	619.884	796.217	513.568	634.29	798.094	430.309	544.83	823.209	459.354	443.635	782.716	434.26
581	5.8	769.769	1247.65	195.208	810.231	1237.8	120.628	829.484	1238.69	261.16	919.359	1058.22	24.789	917.88	1082.21	361.247	840.436	1038.42	198.634	861.384	692.35	-115.547	645.608	792.429	-75.3349	661.173	804.464	1.17627	567.768	808.677	-12.6958	476.369	781.961	11.067	854.816	707.949	519.917	619.894	796.215	513.58	634.324	798.11	430.334	544.841	823.229	459.374	443.638	782.733	434.292
582	5.81	769.78	1247.58	195.205	810.208	1237.75	120.615	829.483	1238.68	261.157	919.357	1058.19	24.7939	917.871	1082.18	361.244	840.509	1038.36	198.661	861.408	692.35	-115.57	645.627	792.416	-75.3077	661.214	804.452	1.18879	567.798	808.644	-12.6878	476.428	781.939	11.0803	854.84	707.946	519.957	619.892	796.211	513.611	634.206	798.198	430.163	544.858	823.202	459.392	443.678	782.708	434.293
583	5.82	769.824	1247.49	195.189	810.205	1237.68	120.585	829.494	1238.66	261.156	919.344	1058.16	24.7935	917.863	1082.15	361.244	840.587	1038.24	198.658	861.405	692.315	-115.582	645.63	792.392	-75.3293	661.246	804.411	1.181	567.819	808.627	-12.6839	476.403	781.913	11.0652	854.842	707.917	519.972	619.894	796.177	513.624	634.014	798.295	429.939	544.844	823.139	459.382	443.698	782.654	434.288
584	5.83	769.897	1247.4	195.152	810.168	1237.63	120.572	829.463	1238.61	261.139	919.328	1058.11	24.7888	917.857	1082.11	361.236	840.665	1038.12	198.629	861.449	692.239	-115.576	645.644	792.342	-75.3391	661.247	804.361	1.17662	567.822	808.591	-12.6781	476.373	781.88	11.0664	854.811	707.876	519.962	619.885	796.143	513.604	634.205	798.055	430.171	544.819	823.081	459.363	443.66	782.597	434.272
585	5.84	769.873	1247.32	195.137	810.142	1237.57	120.562	829.417	1238.58	261.148	919.272	1058.06	24.7852	917.845	1082.06	361.226	840.737	1038.02	198.611	861.465	692.19	-115.588	645.676	792.306	-75.344	661.233	804.333	1.19085	567.859	808.567	-12.7102	476.43	781.843	11.0637	854.815	707.858	519.967	619.894	796.134	513.602	634.249	797.977	430.235	544.835	823.044	459.361	443.656	782.551	434.26
586	5.85	769.797	1247.26	195.131	810.055	1237.55	120.551	829.385	1238.57	261.154	919.223	1058.05	24.7656	917.8	1082.07	361.229	840.696	1038.02	198.61	861.425	692.162	-115.606	645.657	792.298	-75.3605	661.217	804.321	1.18637	567.857	808.56	-12.6987	476.458	781.818	11.0639	854.829	707.856	519.959	619.873	796.13	513.602	634.264	797.961	430.267	544.805	823.036	459.352	443.667	782.552	434.254
587	5.86	769.644	1247.28	195.166	810.006	1237.53	120.539	829.309	1238.54	261.126	919.166	1058.06	24.7452	917.731	1082.08	361.213	840.619	1038.06	198.595	861.396	692.161	-115.597	645.627	792.293	-75.3787	661.183	804.34	1.16752	567.803	808.555	-12.6958	476.443	781.802	11.0444	854.84	707.866	519.948	619.839	796.127	513.582	634.242	797.979	430.269	544.763	823.057	459.334	443.647	782.581	434.251
588	5.87	769.492	1247.33	195.199	809.971	1237.53	120.532	829.255	1238.53	261.118	919.149	1058.09	24.7564	917.7	1082.09	361.203	840.5	1038.13	198.589	861.429	692.187	-115.584	645.649	792.318	-75.3661	661.201	804.37	1.16783	567.783	808.58	-12.7033	476.414	781.842	11.0341	854.822	707.859	519.938	619.828	796.144	513.573	634.222	798.021	430.282	544.775	823.106	459.345	443.65	782.609	434.253
589	5.88	769.374	1247.41	195.23	809.91	1237.58	120.563	829.158	1238.53	261.118	919.163	1058.13	24.7716	917.696	1082.12	361.227	840.423	1038.2	198.621	861.471	692.217	-115.555	645.643	792.358	-75.3554	661.206	804.415	1.18672	567.805	808.615	-12.6816	476.407	781.901	11.06	854.814	707.874	519.951	619.827	796.178	513.578	634.23	798.068	430.312	544.808	823.157	459.374	443.656	782.654	434.269
590	5.89	769.348	1247.39	195.229	809.812	1237.61	120.599	829.168	1238.54	261.134	919.154	1058.16	24.7937	917.673	1082.16	361.248	840.332	1038.28	198.649	861.43	692.267	-115.529	645.572	792.421	-75.3406	661.173	804.473	1.17634	567.751	808.699	-12.6405	476.355	781.971	11.0956	854.829	707.898	519.965	619.852	796.206	513.578	634.251	798.117	430.336	544.814	823.189	459.391	443.638	782.698	434.286
591	5.9	769.3	1247.38	195.212	809.705	1237.63	120.609	829.175	1238.54	261.13	919.138	1058.17	24.792	917.642	1082.17	361.243	840.337	1038.29	198.637	861.365	692.313	-115.533	645.574	792.443	-75.3556	661.136	804.51	1.17092	567.727	808.731	-12.6538	476.351	782.002	11.0949	854.838	707.9	519.965	619.892	796.204	513.556	634.283	798.127	430.345	544.824	823.193	459.372	443.627	782.719	434.289
592	5.91	769.347	1247.33	195.205	809.711	1237.61	120.583	829.162	1238.52	261.109	919.15	1058.15	24.7746	917.669	1082.15	361.22	840.357	1038.25	198.589	861.414	692.308	-115.566	645.625	792.425	-75.3947	661.169	804.487	1.1466	567.768	808.692	-12.6938	476.38	781.973	11.061	854.814	707.869	519.959	619.927	796.188	513.563	634.314	798.096	430.314	544.864	823.172	459.353	443.643	782.712	434.27
593	5.92	769.37	1247.29	195.211	809.759	1237.56	120.543	829.176	1238.51	261.129	919.153	1058.09	24.7694	917.692	1082.13	361.22	840.465	1038.17	198.567	861.47	692.245	-115.605	645.66	792.365	-75.4098	661.235	804.455	1.12076	567.806	808.634	-12.7104	476.442	781.912	11.0449	854.833	707.857	519.975	619.924	796.162	513.58	634.363	798.046	430.298	544.88	823.128	459.37	443.649	782.671	434.254
594	5.93	769.518	1247.19	195.193	809.727	1237.49	120.535	829.178	1238.51	261.16	919.116	1058.02	24.7708	917.65	1082.09	361.229	840.483	1038.1	198.598	861.438	692.16	-115.616	645.654	792.307	-75.3904	661.25	804.405	1.11581	567.782	808.573	-12.7018	476.444	781.855	11.0599	854.857	707.852	519.97	619.902	796.163	513.598	634.347	797.99	430.283	544.84	823.081	459.371	443.654	782.623	434.267
595	5.94	769.504	1247.14	195.177	809.705	1237.45	120.513	829.161	1238.52	261.153	919.067	1057.98	24.7545	917.62	1082.05	361.218	840.516	1038.04	198.603	861.444	692.095	-115.639	645.679	792.259	-75.4136	661.25	804.346	1.09506	567.797	808.52	-12.7333	476.464	781.833	11.0498	854.824	707.847	519.961	619.894	796.167	513.601	634.276	797.94	430.251	544.814	823.046	459.35	443.651	782.551	434.238
596	5.95	769.491	1247.11	195.148	809.72	1237.42	120.474	829.104	1238.51	261.126	919.04	1057.96	24.7247	917.627	1082.03	361.209	840.474	1038	198.555	861.45	692.059	-115.645	645.697	792.238	-75.4495	661.251	804.325	1.06952	567.872	808.496	-12.7579	476.491	781.794	11.0205	854.791	707.835	519.963	619.867	796.147	513.591	634.263	797.906	430.224	544.805	823.026	459.31	443.62	782.52	434.205
597	5.96	769.422	1247.13	195.178	809.683	1237.43	120.5	829.081	1238.52	261.125	919.006	1057.98	24.7414	917.614	1082.06	361.218	840.453	1038.01	198.582	861.44	692.099	-115.613	645.683	792.266	-75.4256	661.232	804.335	1.11743	567.894	808.524	-12.7624	476.456	781.807	11.02	854.804	707.849	519.963	619.829	796.129	513.583	634.252	797.936	430.238	544.762	823.038	459.313	443.612	782.544	434.215
598	5.97	769.308	1247.23	195.281	809.612	1237.5	120.603	829.057	1238.52	261.145	918.973	1058.05	24.8092	917.569	1082.12	361.284	840.326	1038.09	198.677	861.38	692.205	-115.557	645.634	792.323	-75.3395	661.174	804.383	1.19124	567.806	808.583	-12.673	476.391	781.873	11.0999	854.825	707.86	519.963	619.828	796.138	513.599	634.108	798.115	430.135	544.768	823.087	459.37	443.631	782.619	434.282
599	5.98	769.25	1247.31	195.318	809.571	1237.57	120.668	829.045	1238.52	261.16	918.96	1058.12	24.8588	917.55	1082.17	361.327	840.22	1038.2	198.759	861.319	692.307	-115.517	645.599	792.405	-75.2778	661.119	804.447	1.24848	567.744	808.649	-12.6005	476.372	781.918	11.1238	854.785	707.865	519.983	619.812	796.159	513.611	633.956	798.356	429.99	544.758	823.132	459.412	443.651	782.701	434.334
600	5.99	769.177	1247.38	195.307	809.587	1237.63	120.664	829.036	1238.53	261.168	918.941	1058.16	24.8525	917.544	1082.21	361.328	840.239	1038.26	198.751	861.349	692.334	-115.487	645.596	792.452	-75.2678	661.128	804.488	1.26634	567.748	808.685	-12.6105	476.357	781.945	11.1238	854.753	707.865	519.989	619.769	796.156	513.607	634.193	798.232	430.29	544.788	823.186	459.418	443.633	782.733	434.335
601	6	769.171	1247.42	195.253	809.598	1237.62	120.629	829.017	1238.57	261.142	918.903	1058.17	24.8284	917.543	1082.21	361.299	840.224	1038.29	198.702	861.404	692.319	-115.514	645.594	792.445	-75.3041	661.14	804.474	1.205	567.72	808.68	-12.6339	476.38	781.942	11.0873	854.776	707.875	519.996	619.776	796.168	513.591	634.282	798.182	430.344	544.781	823.203	459.378	443.619	782.736	434.305
602	6.01	769.21	1247.42	195.217	809.613	1237.6	120.576	829.054	1238.58	261.133	918.898	1058.15	24.7952	917.542	1082.17	361.275	840.245	1038.23	198.654	861.39	692.288	-115.59	645.611	792.417	-75.3521	661.164	804.441	1.16155	567.743	808.647	-12.687	476.399	781.921	11.0457	854.813	707.879	519.986	619.825	796.181	513.593	634.317	798.106	430.326	544.808	823.175	459.355	443.641	782.693	434.256
603	6.02	769.37	1247.34	195.16	809.676	1237.58	120.514	829.093	1238.57	261.135	918.917	1058.12	24.7727	917.56	1082.12	361.253	840.306	1038.16	198.587	861.371	692.222	-115.638	645.644	792.374	-75.4027	661.174	804.415	1.12603	567.808	808.611	-12.7494	476.428	781.895	11.0038	854.846	707.872	519.979	619.881	796.178	513.587	634.316	798.015	430.281	544.837	823.131	459.322	443.638	782.644	434.207
604	6.03	769.4	1247.28	195.142	809.695	1237.56	120.517	829.088	1238.55	261.144	918.908	1058.06	24.7741	917.562	1082.07	361.254	840.357	1038.09	198.574	861.389	692.189	-115.637	645.643	792.339	-75.424	661.162	804.371	1.11104	567.825	808.562	-12.7492	476.443	781.885	11.0012	854.856	707.825	519.972	619.902	796.165	513.586	634.293	797.943	430.267	544.802	823.083	459.3	443.615	782.595	434.175
605	6.04	769.411	1247.26	195.172	809.653	1237.54	120.589	829.155	1238.53	261.159	918.937	1058.04	24.7898	917.603	1082.03	361.285	840.375	1038.05	198.621	861.39	692.185	-115.59	645.604	792.324	-75.3778	661.161	804.346	1.13226	567.784	808.544	-12.7105	476.398	781.879	11.0393	854.865	707.792	519.967	619.92	796.135	513.582	634.312	797.907	430.286	544.839	823.066	459.323	443.601	782.586	434.211
606	6.05	769.428	1247.27	195.253	809.701	1237.55	120.634	829.235	1238.53	261.208	919.009	1058.04	24.8248	917.623	1082.02	361.31	840.506	1038.03	198.694	861.375	692.2	-115.592	645.607	792.347	-75.3432	661.197	804.343	1.1825	567.82	808.552	-12.6716	476.415	781.855	11.0638	854.858	707.755	519.974	619.967	796.119	513.607	634.351	797.918	430.307	544.905	823.039	459.373	443.666	782.583	434.267
607	6.06	769.41	1247.3	195.321	809.736	1237.56	120.654	829.223	1238.52	261.255	919.044	1058.06	24.8674	917.605	1082.04	361.333	840.6	1038.03	198.749	861.386	692.241	-115.593	645.652	792.363	-75.3262	661.216	804.364	1.19933	567.865	808.561	-12.6433	476.437	781.85	11.0762	854.833	707.738	520.008	619.943	796.117	513.63	634.23	798.084	430.165	544.894	823.057	459.405	443.679	782.591	434.292
608	6.07	769.399	1247.3	195.342	809.716	1237.59	120.68	829.164	1238.52	261.248	919.026	1058.08	24.8805	917.592	1082.05	361.352	840.476	1038.1	198.753	861.399	692.253	-115.571	645.655	792.378	-75.3208	661.207	804.386	1.19914	567.844	808.588	-12.6446	476.405	781.856	11.0896	854.763	707.721	519.99	619.882	796.116	513.609	634.042	798.294	429.982	544.857	823.092	459.407	443.651	782.627	434.308
609	6.08	769.478	1247.3	195.316	809.712	1237.62	120.703	829.117	1238.51	261.221	919.013	1058.12	24.8734	917.571	1082.07	361.361	840.384	1038.19	198.763	861.38	692.295	-115.568	645.638	792.393	-75.3309	661.185	804.419	1.20653	567.779	808.627	-12.6499	476.388	781.88	11.0914	854.738	707.743	519.986	619.845	796.137	513.587	634.249	798.162	430.256	544.83	823.137	459.396	443.635	782.668	434.298
610	6.09	769.41	1247.38	195.352	809.739	1237.64	120.72	829.11	1238.54	261.242	919.046	1058.17	24.8859	917.573	1082.08	361.363	840.357	1038.24	198.766	861.394	692.322	-115.572	645.617	792.405	-75.3192	661.182	804.445	1.19633	567.752	808.67	-12.6539	476.393	781.905	11.1016	854.733	707.786	519.997	619.838	796.18	513.598	634.255	798.13	430.314	544.809	823.163	459.392	443.63	782.693	434.295
611	6.1	769.327	1247.43	195.371	809.726	1237.65	120.748	829.12	1238.56	261.259	919.037	1058.17	24.868	917.547	1082.08	361.348	840.327	1038.26	198.731	861.388	692.309	-115.559	645.577	792.42	-75.3067	661.163	804.447	1.18461	567.743	808.673	-12.6462	476.404	781.924	11.0845	854.742	707.81	519.992	619.81	796.203	513.597	634.227	798.11	430.327	544.771	823.181	459.374	443.603	782.706	434.282
612	6.11	769.368	1247.38	195.369	809.738	1237.65	120.754	829.127	1238.54	261.243	919.024	1058.14	24.8413	917.556	1082.06	361.331	840.342	1038.21	198.686	861.389	692.278	-115.552	645.579	792.404	-75.3357	661.169	804.437	1.16382	567.75	808.653	-12.7042	476.395	781.916	11.0565	854.755	707.806	519.967	619.844	796.197	513.57	634.195	798.079	430.3	544.766	823.182	459.337	443.59	782.677	434.237
613	6.12	769.476	1247.32	195.363	809.79	1237.61	120.747	829.187	1238.52	261.24	919.078	1058.12	24.8387	917.624	1082.02	361.296	840.459	1038.14	198.69	861.43	692.252	-115.593	645.623	792.37	-75.3855	661.191	804.403	1.14738	567.82	808.589	-12.7633	476.411	781.907	11.0379	854.81	707.796	519.964	619.87	796.183	513.566	634.249	798.037	430.276	544.786	823.139	459.316	443.625	782.625	434.213
614	6.13	769.636	1247.23	195.38	809.861	1237.58	120.774	829.257	1238.5	261.283	919.152	1058.08	24.8522	917.674	1081.99	361.282	840.63	1038.08	198.732	861.448	692.223	-115.633	645.685	792.332	-75.3744	661.232	804.35	1.16027	567.878	808.543	-12.7506	476.464	781.889	11.0364	854.841	707.781	519.983	619.899	796.159	513.593	634.299	797.99	430.277	544.845	823.092	459.353	443.675	782.595	434.234
615	6.14	769.646	1247.19	195.427	809.89	1237.57	120.83	829.315	1238.48	261.322	919.166	1058.04	24.8772	917.687	1081.96	361.283	840.702	1038.04	198.763	861.447	692.188	-115.604	645.69	792.305	-75.3512	661.192	804.335	1.19313	567.865	808.526	-12.7001	476.465	781.846	11.0653	854.81	707.736	519.979	619.897	796.127	513.618	634.327	797.965	430.302	544.849	823.061	459.385	443.692	782.577	434.276
616	6.15	769.602	1247.23	195.447	809.914	1237.58	120.817	829.308	1238.47	261.318	919.173	1058.03	24.8746	917.714	1081.97	361.275	840.672	1038.04	198.747	861.482	692.186	-115.602	645.687	792.298	-75.3526	661.198	804.326	1.19703	567.843	808.513	-12.6716	476.464	781.82	11.0616	854.791	707.724	519.978	619.87	796.109	513.61	634.196	798.094	430.137	544.806	823.045	459.372	443.659	782.584	434.262
617	6.16	769.657	1247.26	195.433	809.926	1237.62	120.793	829.331	1238.49	261.31	919.165	1058.04	24.8456	917.741	1082	361.272	840.664	1038.09	198.689	861.448	692.212	-115.607	645.693	792.318	-75.3671	661.223	804.335	1.19354	567.856	808.538	-12.6926	476.467	781.822	11.0448	854.803	707.727	519.974	619.871	796.108	513.593	634.061	798.255	429.925	544.799	823.05	459.365	443.657	782.62	434.241
618	6.17	769.73	1247.3	195.409	809.911	1237.65	120.823	829.367	1238.51	261.321	919.172	1058.06	24.8543	917.759	1082.03	361.301	840.636	1038.16	198.714	861.44	692.223	-115.564	645.664	792.363	-75.348	661.187	804.386	1.19949	567.813	808.589	-12.69	476.422	781.87	11.0503	854.816	707.752	519.975	619.878	796.145	513.601	634.301	798.089	430.225	544.816	823.083	459.363	443.667	782.659	434.262
619	6.18	769.637	1247.39	195.434	809.893	1237.68	120.842	829.376	1238.55	261.317	919.165	1058.08	24.8945	917.749	1082.06	361.333	840.525	1038.23	198.751	861.429	692.245	-115.51	645.629	792.414	-75.3058	661.164	804.421	1.21554	567.757	808.645	-12.6729	476.411	781.924	11.0825	854.829	707.795	519.97	619.884	796.168	513.603	634.319	798.07	430.312	544.823	823.144	459.38	443.652	782.686	434.271
620	6.19	769.565	1247.45	195.44	809.911	1237.7	120.808	829.366	1238.59	261.294	919.142	1058.07	24.8768	917.754	1082.11	361.338	840.412	1038.27	198.736	861.416	692.25	-115.523	645.604	792.433	-75.3079	661.171	804.429	1.19419	567.775	808.645	-12.6671	476.407	781.934	11.0702	854.82	707.825	519.963	619.876	796.171	513.593	634.29	798.073	430.323	544.822	823.16	459.376	443.65	782.681	434.268
621	6.2	769.576	1247.46	195.413	809.951	1237.69	120.773	829.379	1238.59	261.273	919.142	1058.06	24.8629	917.762	1082.12	361.316	840.468	1038.2	198.729	861.416	692.248	-115.567	645.635	792.413	-75.3382	661.207	804.417	1.17903	567.794	808.608	-12.657	476.44	781.897	11.0512	854.841	707.855	519.977	619.853	796.154	513.589	634.262	798.074	430.296	544.822	823.135	459.37	443.659	782.66	434.252
622	6.21	769.688	1247.44	195.416	809.97	1237.68	120.769	829.43	1238.61	261.27	919.164	1058.05	24.8893	917.771	1082.1	361.326	840.628	1038.13	198.817	861.43	692.233	-115.582	645.683	792.366	-75.3277	661.228	804.388	1.21765	567.839	808.592	-12.6394	476.45	781.883	11.0793	854.863	707.875	520.024	619.862	796.132	513.618	634.26	798.079	430.299	544.875	823.129	459.406	443.695	782.647	434.268
623	6.22	769.746	1247.44	195.419	810.009	1237.67	120.769	829.426	1238.63	261.277	919.16	1058.05	24.9102	917.809	1082.09	361.341	840.641	1038.12	198.868	861.438	692.216	-115.562	645.708	792.352	-75.3079	661.228	804.384	1.24204	567.869	808.568	-12.6477	476.414	781.886	11.1098	854.835	707.869	520.046	619.868	796.133	513.644	634.298	798.081	430.32	544.887	823.128	459.442	443.691	782.649	434.301
624	6.23	769.642	1247.51	195.38	810.052	1237.68	120.739	829.439	1238.64	261.249	919.139	1058.04	24.9064	917.805	1082.1	361.36	840.547	1038.15	198.838	861.383	692.227	-115.532	645.675	792.378	-75.31	661.21	804.396	1.21713	567.815	808.566	-12.6447	476.387	781.905	11.1097	854.821	707.875	520.043	619.869	796.129	513.636	634.319	798.059	430.336	544.854	823.13	459.428	443.669	782.66	434.294
625	6.24	769.753	1247.5	195.273	810.074	1237.69	120.688	829.458	1238.63	261.197	919.151	1058.03	24.8816	917.808	1082.09	361.338	840.527	1038.15	198.775	861.395	692.224	-115.555	645.66	792.384	-75.3443	661.178	804.393	1.18958	567.804	808.618	-12.6899	476.409	781.906	11.0626	854.871	707.874	520.021	619.871	796.127	513.614	634.34	798.01	430.336	544.831	823.107	459.379	443.661	782.653	434.252
626	6.25	769.796	1247.49	195.207	810.108	1237.67	120.62	829.462	1238.63	261.164	919.17	1058.01	24.8571	917.822	1082.07	361.31	840.537	1038.13	198.712	861.425	692.192	-115.593	645.651	792.357	-75.3821	661.189	804.381	1.15068	567.817	808.616	-12.7474	476.427	781.88	10.9981	854.879	707.862	520.014	619.895	796.145	513.592	634.37	797.948	430.311	544.831	823.084	459.33	443.661	782.612	434.219
627	6.26	769.758	1247.52	195.186	810.174	1237.64	120.574	829.493	1238.66	261.134	919.196	1058	24.8427	917.835	1082.04	361.293	840.566	1038.12	198.68	861.452	692.169	-115.616	645.667	792.339	-75.389	661.204	804.351	1.12991	567.797	808.593	-12.7884	476.42	781.865	10.9975	854.9	707.869	520.005	619.925	796.151	513.583	634.391	797.907	430.308	544.84	823.073	459.322	443.661	782.604	434.207
628	6.27	769.709	1247.54	195.171	810.201	1237.65	120.559	829.485	1238.68	261.135	919.205	1058.02	24.8331	917.836	1082.05	361.289	840.526	1038.15	198.679	861.447	692.188	-115.599	645.665	792.343	-75.3943	661.195	804.362	1.12504	567.767	808.596	-12.7642	476.409	781.875	11.0155	854.887	707.848	519.988	619.944	796.146	513.58	634.371	797.928	430.303	544.864	823.07	459.341	443.653	782.625	434.215
629	6.28	769.677	1247.59	195.21	810.195	1237.69	120.587	829.471	1238.67	261.153	919.24	1058.05	24.861	917.823	1082.06	361.311	840.538	1038.18	198.717	861.424	692.22	-115.569	645.646	792.364	-75.3637	661.18	804.38	1.16027	567.797	808.59	-12.716	476.419	781.868	11.0312	854.847	707.823	519.991	619.925	796.144	513.601	634.359	797.989	430.308	544.85	823.087	459.358	443.664	782.653	434.251
630	6.29	769.707	1247.61	195.235	810.236	1237.71	120.621	829.482	1238.68	261.157	919.253	1058.09	24.8895	917.817	1082.09	361.335	840.584	1038.21	198.791	861.439	692.279	-115.536	645.643	792.405	-75.3148	661.201	804.404	1.20652	567.818	808.605	-12.6831	476.441	781.888	11.0695	854.804	707.818	520.018	619.891	796.132	513.627	634.181	798.174	430.166	544.833	823.135	459.391	443.7	782.678	434.294
631	6.3	769.735	1247.63	195.264	810.227	1237.75	120.685	829.481	1238.69	261.177	919.254	1058.12	24.9245	917.801	1082.11	361.364	840.656	1038.23	198.856	861.463	692.365	-115.522	645.642	792.452	-75.2612	661.222	804.415	1.24905	567.825	808.629	-12.6336	476.456	781.909	11.1208	854.767	707.809	520.049	619.841	796.122	513.629	633.977	798.383	429.997	544.832	823.182	459.438	443.718	782.701	434.343
632	6.31	769.67	1247.7	195.29	810.2	1237.79	120.715	829.459	1238.69	261.185	919.253	1058.14	24.9306	917.787	1082.12	361.383	840.542	1038.28	198.827	861.441	692.384	-115.496	645.612	792.474	-75.2565	661.192	804.43	1.26527	567.787	808.654	-12.6176	476.422	781.936	11.1349	854.728	707.826	520.027	619.811	796.137	513.621	634.177	798.236	430.262	544.823	823.207	459.441	443.678	782.729	434.351
633	6.32	769.741	1247.66	195.257	810.198	1237.77	120.692	829.46	1238.69	261.169	919.231	1058.11	24.9038	917.77	1082.1	361.351	840.494	1038.26	198.746	861.429	692.328	-115.51	645.616	792.448	-75.2914	661.179	804.422	1.22608	567.766	808.649	-12.6527	476.39	781.929	11.1018	854.742	707.823	519.988	619.792	796.155	513.602	634.212	798.14	430.309	544.794	823.187	459.406	443.645	782.691	434.311
634	6.33	769.841	1247.55	195.207	810.274	1237.72	120.608	829.434	1238.67	261.16	919.254	1058.04	24.8665	917.817	1082.04	361.301	840.611	1038.11	198.643	861.469	692.204	-115.564	645.684	792.373	-75.373	661.228	804.369	1.14656	567.833	808.608	-12.726	476.447	781.877	11.035	854.807	707.795	519.974	619.835	796.167	513.595	634.266	798.021	430.274	544.779	823.119	459.342	443.653	782.627	434.243
635	6.34	769.985	1247.5	195.172	810.352	1237.67	120.566	829.483	1238.66	261.155	919.294	1057.97	24.8169	917.884	1081.98	361.261	840.726	1038	198.596	861.519	692.106	-115.601	645.735	792.301	-75.4373	661.256	804.316	1.10092	567.885	808.554	-12.7832	476.515	781.831	10.9565	854.876	707.779	519.954	619.917	796.167	513.573	634.308	797.916	430.238	544.818	823.055	459.305	443.646	782.575	434.192
636	6.35	769.935	1247.5	195.223	810.318	1237.65	120.605	829.558	1238.62	261.187	919.313	1057.95	24.8163	917.902	1081.93	361.259	840.68	1038.01	198.628	861.48	692.083	-115.591	645.719	792.287	-75.4135	661.229	804.318	1.11495	567.847	808.539	-12.7668	476.5	781.846	10.9741	854.888	707.738	519.931	619.967	796.141	513.565	634.343	797.879	430.256	544.827	823.032	459.305	443.627	782.565	434.189
637	6.36	769.848	1247.54	195.303	810.274	1237.67	120.676	829.618	1238.59	261.209	919.328	1057.96	24.8471	917.878	1081.94	361.292	840.633	1038.07	198.69	861.439	692.122	-115.554	645.675	792.337	-75.3594	661.204	804.354	1.15135	567.787	808.59	-12.6923	476.462	781.875	11.0106	854.886	707.703	519.926	619.996	796.125	513.581	634.368	797.902	430.3	544.872	823.033	459.355	443.639	782.594	434.234
638	6.37	769.874	1247.55	195.295	810.251	1237.73	120.723	829.634	1238.59	261.227	919.341	1058	24.8759	917.897	1081.98	361.332	840.65	1038.1	198.737	861.456	692.207	-115.544	645.668	792.395	-75.3282	661.23	804.395	1.18577	567.815	808.625	-12.6597	476.473	781.903	11.0275	854.911	707.719	519.95	619.991	796.126	513.604	634.3	798.094	430.165	544.942	823.065	459.404	443.674	782.661	434.287
639	6.38	769.943	1247.56	195.32	810.193	1237.78	120.771	829.608	1238.62	261.231	919.331	1058.07	24.8884	917.903	1082.03	361.351	840.669	1038.15	198.763	861.463	692.305	-115.544	645.676	792.446	-75.3168	661.235	804.443	1.21493	567.84	808.643	-12.6626	476.473	781.933	11.0513	854.9	707.749	519.958	619.958	796.156	513.609	634.114	798.333	429.969	544.918	823.139	459.408	443.702	782.722	434.292
640	6.39	769.828	1247.62	195.393	810.131	1237.81	120.807	829.516	1238.64	261.232	919.28	1058.13	24.9068	917.835	1082.06	361.36	840.564	1038.23	198.782	861.405	692.35	-115.493	645.624	792.488	-75.2972	661.206	804.478	1.23947	567.808	808.677	-12.6513	476.427	781.985	11.063	854.789	707.768	519.958	619.895	796.186	513.615	634.263	798.231	430.256	544.861	823.223	459.416	443.677	782.75	434.299
641	6.4	769.728	1247.63	195.422	810.116	1237.8	120.799	829.481	1238.65	261.267	919.232	1058.13	24.9004	917.806	1082.07	361.342	840.542	1038.23	198.795	861.402	692.328	-115.508	645.602	792.461	-75.2861	661.189	804.47	1.234	567.802	808.687	-12.6272	476.374	781.984	11.0815	854.73	707.789	519.962	619.83	796.191	513.625	634.213	798.188	430.309	544.793	823.237	459.413	443.668	782.744	434.304
642	6.41	769.812	1247.55	195.365	810.157	1237.72	120.758	829.445	1238.65	261.271	919.211	1058.1	24.8588	917.799	1082.04	361.298	840.597	1038.15	198.757	861.445	692.246	-115.57	645.664	792.39	-75.3322	661.218	804.413	1.18299	567.824	808.637	-12.6714	476.398	781.947	11.0519	854.723	707.798	519.961	619.788	796.188	513.616	634.165	798.114	430.265	544.814	823.193	459.389	443.663	782.679	434.266
643	6.42	769.841	1247.47	195.323	810.169	1237.64	120.705	829.458	1238.63	261.261	919.177	1058.04	24.8209	917.787	1081.97	361.258	840.686	1038.03	198.705	861.467	692.147	-115.658	645.717	792.29	-75.3975	661.244	804.336	1.13532	567.867	808.54	-12.7324	476.438	781.86	11.0191	854.766	707.785	519.955	619.801	796.178	513.601	634.157	798.043	430.215	544.815	823.103	459.355	443.674	782.603	434.223
644	6.43	769.873	1247.38	195.308	810.147	1237.6	120.691	829.477	1238.61	261.244	919.153	1057.97	24.8022	917.814	1081.93	361.236	840.686	1037.92	198.69	861.455	692.091	-115.684	645.719	792.242	-75.4123	661.259	804.27	1.12311	567.864	808.472	-12.7737	476.457	781.81	11.0186	854.801	707.762	519.949	619.847	796.16	513.601	634.192	797.959	430.207	544.787	823.043	459.328	443.652	782.547	434.198
645	6.44	769.93	1247.33	195.297	810.124	1237.59	120.695	829.491	1238.58	261.247	919.173	1057.95	24.8007	917.845	1081.93	361.247	840.707	1037.91	198.713	861.465	692.083	-115.634	645.727	792.261	-75.3957	661.27	804.267	1.14427	567.897	808.478	-12.7583	476.491	781.798	11.018	854.82	707.731	519.949	619.919	796.136	513.615	634.268	797.919	430.224	544.85	823.015	459.347	443.664	782.554	434.213
646	6.45	769.855	1247.4	195.302	810.101	1237.64	120.698	829.512	1238.57	261.247	919.208	1057.98	24.8327	917.862	1081.96	361.292	840.671	1037.99	198.725	861.45	692.161	-115.589	645.719	792.324	-75.3465	661.258	804.326	1.17298	567.893	808.56	-12.6998	476.517	781.844	11.0288	854.873	707.721	519.954	619.964	796.122	513.605	634.36	797.946	430.27	544.928	823.044	459.384	443.683	782.607	434.243
647	6.46	769.663	1247.51	195.329	810.034	1237.71	120.724	829.485	1238.56	261.235	919.2	1058.03	24.8603	917.838	1082	361.32	840.575	1038.1	198.764	861.42	692.265	-115.579	645.667	792.388	-75.3089	661.209	804.405	1.21682	567.837	808.617	-12.6634	476.434	781.927	11.0662	854.87	707.711	519.944	619.951	796.119	513.594	634.432	798.017	430.338	544.948	823.113	459.397	443.653	782.682	434.283
648	6.47	769.534	1247.61	195.337	809.98	1237.76	120.723	829.441	1238.58	261.213	919.161	1058.07	24.877	917.8	1082.05	361.334	840.418	1038.21	198.749	861.445	692.323	-115.569	645.658	792.45	-75.3191	661.167	804.479	1.20831	567.799	808.683	-12.6446	476.373	781.98	11.0928	854.835	707.724	519.944	619.919	796.137	513.602	634.441	798.085	430.379	544.941	823.183	459.403	443.648	782.744	434.294
649	6.48	769.53	1247.64	195.321	809.961	1237.77	120.71	829.373	1238.6	261.199	919.1	1058.1	24.8705	917.767	1082.09	361.338	840.317	1038.24	198.737	861.444	692.335	-115.559	645.653	792.471	-75.331	661.165	804.5	1.17364	567.787	808.71	-12.6745	476.354	781.991	11.0954	854.806	707.752	519.955	619.884	796.173	513.615	634.393	798.116	430.371	544.898	823.219	459.412	443.674	782.764	434.298
650	6.49	769.561	1247.6	195.272	809.906	1237.74	120.693	829.322	1238.62	261.187	919.062	1058.1	24.8472	917.681	1082.07	361.308	840.275	1038.22	198.69	861.417	692.277	-115.581	645.627	792.443	-75.3364	661.141	804.467	1.16743	567.774	808.682	-12.6862	476.38	781.97	11.0789	854.803	707.784	519.957	619.862	796.202	513.611	634.303	798.111	430.338	544.853	823.219	459.394	443.67	782.724	434.28
651	6.5	769.602	1247.46	195.24	809.915	1237.66	120.633	829.313	1238.62	261.161	919.023	1058.07	24.8084	917.619	1082.03	361.287	840.311	1038.12	198.652	861.409	692.175	-115.597	645.64	792.378	-75.3665	661.129	804.418	1.15657	567.782	808.631	-12.7045	476.409	781.926	11.0541	854.822	707.8	519.958	619.861	796.207	513.604	634.213	798.076	430.283	544.785	823.182	459.341	443.645	782.657	434.246
652	6.51	769.696	1247.32	195.219	809.953	1237.59	120.575	829.301	1238.61	261.157	919.003	1058.01	24.7662	917.631	1081.97	361.259	840.437	1037.97	198.616	861.458	692.099	-115.645	645.698	792.311	-75.3993	661.191	804.355	1.1328	567.854	808.573	-12.7333	476.434	781.874	11.0442	854.808	707.77	519.961	619.866	796.192	513.603	634.166	798.001	430.226	544.779	823.107	459.315	443.652	782.577	434.21
653	6.52	769.753	1247.26	195.187	809.985	1237.53	120.564	829.299	1238.59	261.154	919.023	1057.97	24.7665	917.655	1081.92	361.254	840.613	1037.84	198.641	861.513	692.07	-115.658	645.749	792.27	-75.4123	661.259	804.31	1.12969	567.887	808.543	-12.7348	476.482	781.815	11.0457	854.82	707.719	519.965	619.896	796.162	513.614	634.177	797.942	430.208	544.841	823.038	459.328	443.681	782.516	434.216
654	6.53	769.752	1247.27	195.167	810.014	1237.52	120.571	829.319	1238.54	261.142	919.049	1057.95	24.791	917.645	1081.91	361.257	840.723	1037.81	198.673	861.539	692.083	-115.643	645.78	792.272	-75.3925	661.282	804.302	1.15738	567.889	808.52	-12.7114	476.513	781.794	11.0451	854.844	707.676	519.985	619.918	796.119	513.618	634.251	797.95	430.243	544.887	823.017	459.362	443.697	782.535	434.243
655	6.54	769.595	1247.34	195.194	809.949	1237.55	120.571	829.316	1238.52	261.136	919.068	1057.97	24.8023	917.631	1081.93	361.276	840.595	1037.88	198.685	861.5	692.13	-115.629	645.761	792.315	-75.3622	661.291	804.338	1.18026	567.874	808.543	-12.673	476.491	781.833	11.0836	854.853	707.645	519.985	619.925	796.109	513.612	634.335	798.013	430.29	544.903	823.052	459.393	443.709	782.61	434.276
656	6.55	769.493	1247.41	195.23	809.852	1237.59	120.586	829.314	1238.52	261.143	919.069	1058	24.8229	917.613	1081.97	361.311	840.44	1038.03	198.722	861.451	692.216	-115.599	645.701	792.366	-75.3232	661.23	804.409	1.203	567.823	808.609	-12.6445	476.451	781.905	11.1038	854.837	707.652	519.985	619.906	796.12	513.61	634.399	798.07	430.35	544.892	823.119	459.42	443.678	782.693	434.301
657	6.56	769.353	1247.48	195.256	809.762	1237.62	120.613	829.252	1238.52	261.132	919.041	1058.02	24.8452	917.567	1082.01	361.325	840.299	1038.15	198.705	861.442	692.243	-115.535	645.651	792.406	-75.3174	661.146	804.462	1.21918	567.74	808.68	-12.6355	476.414	781.963	11.1129	854.815	707.685	519.984	619.865	796.131	513.594	634.448	798.1	430.394	544.871	823.182	459.416	443.647	782.742	434.315
658	6.57	769.303	1247.5	195.219	809.715	1237.63	120.597	829.2	1238.53	261.104	919.003	1058.02	24.8261	917.548	1082.02	361.301	840.202	1038.18	198.659	861.442	692.232	-115.536	645.609	792.423	-75.3441	661.12	804.477	1.20124	567.698	808.71	-12.6538	476.368	781.981	11.0927	854.8	707.71	519.976	619.853	796.148	513.583	634.418	798.091	430.373	544.831	823.205	459.374	443.611	782.751	434.299
659	6.58	769.347	1247.42	195.155	809.704	1237.6	120.527	829.18	1238.55	261.088	918.958	1057.99	24.7798	917.533	1082.01	361.253	840.222	1038.11	198.594	861.432	692.182	-115.594	645.626	792.391	-75.4036	661.164	804.445	1.13368	567.766	808.676	-12.707	476.386	781.96	11.0479	854.771	707.733	519.971	619.85	796.164	513.587	634.35	798.046	430.322	544.791	823.173	459.329	443.621	782.709	434.25
660	6.59	769.278	1247.38	195.178	809.721	1237.54	120.494	829.132	1238.55	261.082	918.942	1057.97	24.7592	917.54	1081.98	361.24	840.346	1037.99	198.574	861.436	692.103	-115.609	645.661	792.333	-75.4214	661.189	804.402	1.10818	567.848	808.625	-12.7477	476.437	781.91	11.0055	854.785	707.747	519.973	619.842	796.182	513.595	634.291	798.004	430.293	544.774	823.13	459.33	443.634	782.645	434.23
661	6.6	769.448	1247.25	195.171	809.718	1237.48	120.526	829.129	1238.55	261.092	918.956	1057.95	24.7799	917.542	1081.96	361.258	840.453	1037.92	198.617	861.436	692.046	-115.605	645.683	792.286	-75.3718	661.223	804.362	1.11479	567.837	808.582	-12.7293	476.431	781.865	11.0334	854.797	707.744	519.965	619.859	796.179	513.595	634.199	797.972	430.269	544.775	823.086	459.354	443.632	782.601	434.238
662	6.61	769.513	1247.18	195.153	809.739	1237.43	120.538	829.133	1238.54	261.084	918.95	1057.92	24.7968	917.544	1081.94	361.265	840.571	1037.85	198.649	861.44	692.023	-115.629	645.695	792.274	-75.3641	661.254	804.33	1.12311	567.866	808.57	-12.7274	476.457	781.827	11.0409	854.793	707.726	519.98	619.882	796.159	513.598	634.18	797.972	430.248	544.795	823.043	459.353	443.66	782.572	434.234
663	6.62	769.499	1247.19	195.13	809.783	1237.42	120.507	829.13	1238.53	261.06	918.948	1057.93	24.7738	917.549	1081.93	361.243	840.597	1037.86	198.623	861.466	692.046	-115.665	645.73	792.27	-75.4131	661.28	804.328	1.10513	567.891	808.565	-12.75	476.485	781.817	11.0114	854.805	707.709	519.989	619.905	796.144	513.591	634.2	797.985	430.215	544.821	823.045	459.329	443.687	782.562	434.225
664	6.63	769.324	1247.3	195.167	809.758	1237.46	120.511	829.135	1238.53	261.066	918.937	1057.96	24.7843	917.53	1081.95	361.239	840.533	1037.94	198.658	861.462	692.095	-115.643	645.715	792.302	-75.4114	661.273	804.358	1.12778	567.874	808.567	-12.724	476.466	781.861	11.0137	854.824	707.716	519.989	619.881	796.143	513.586	634.223	798.023	430.233	544.828	823.082	459.334	443.702	782.616	434.246
665	6.64	769.21	1247.39	195.212	809.657	1237.53	120.577	829.128	1238.56	261.092	918.921	1057.99	24.8334	917.486	1082	361.283	840.369	1038.08	198.707	861.401	692.169	-115.554	645.654	792.385	-75.3454	661.19	804.414	1.18539	567.778	808.645	-12.6704	476.393	781.912	11.0868	854.799	707.713	519.975	619.873	796.15	513.592	634.306	798.089	430.317	544.838	823.146	459.368	443.663	782.685	434.287
666	6.65	769.042	1247.47	195.266	809.593	1237.57	120.628	829.108	1238.56	261.097	918.908	1058.02	24.8704	917.508	1082.05	361.346	840.3	1038.18	198.763	861.348	692.23	-115.51	645.596	792.438	-75.294	661.147	804.464	1.22233	567.736	808.705	-12.6321	476.361	781.972	11.1236	854.768	707.705	519.978	619.876	796.156	513.62	634.363	798.125	430.378	544.823	823.17	459.425	443.631	782.727	434.324
667	6.66	769.104	1247.44	195.237	809.643	1237.58	120.603	829.099	1238.55	261.09	918.922	1058.01	24.8737	917.53	1082.05	361.35	840.286	1038.21	198.747	861.366	692.257	-115.54	645.612	792.426	-75.3147	661.154	804.472	1.21228	567.758	808.689	-12.6539	476.344	781.979	11.1198	854.732	707.689	519.983	619.846	796.144	513.607	634.228	798.227	430.212	544.82	823.155	459.42	443.651	782.72	434.306
668	6.67	769.237	1247.39	195.208	809.694	1237.55	120.573	829.121	1238.55	261.094	918.922	1057.97	24.8581	917.521	1082.01	361.335	840.391	1038.12	198.708	861.376	692.226	-115.59	645.628	792.405	-75.3506	661.204	804.416	1.1893	567.823	808.62	-12.6744	476.381	781.928	11.1058	854.776	707.679	520.003	619.855	796.122	513.587	634.025	798.313	429.965	544.849	823.117	459.406	443.658	782.668	434.266
669	6.68	769.418	1247.32	195.175	809.722	1237.52	120.571	829.156	1238.57	261.116	918.942	1057.94	24.8599	917.573	1081.97	361.319	840.519	1038.04	198.717	861.41	692.159	-115.607	645.666	792.355	-75.36	661.229	804.372	1.18375	567.835	808.593	-12.6977	476.405	781.894	11.0964	854.849	707.701	520.015	619.891	796.121	513.602	634.256	798.048	430.224	544.861	823.081	459.389	443.663	782.621	434.249
670	6.69	769.517	1247.29	195.177	809.731	1237.51	120.576	829.179	1238.58	261.138	918.946	1057.94	24.8763	917.581	1081.96	361.332	840.581	1038	198.725	861.418	692.083	-115.594	645.685	792.32	-75.3532	661.222	804.346	1.17264	567.823	808.572	-12.6778	476.411	781.866	11.0922	854.893	707.734	520.014	619.928	796.141	513.631	634.308	797.968	430.285	544.846	823.059	459.4	443.686	782.594	434.272
671	6.7	769.473	1247.34	195.14	809.765	1237.51	120.551	829.172	1238.59	261.142	918.91	1057.93	24.8549	917.541	1081.97	361.32	840.509	1037.99	198.682	861.387	692.044	-115.579	645.684	792.309	-75.3766	661.218	804.332	1.14428	567.826	808.562	-12.7	476.398	781.857	11.0542	854.856	707.729	519.998	619.905	796.166	513.617	634.301	797.965	430.286	544.847	823.067	459.367	443.661	782.605	434.247
672	6.71	769.443	1247.38	195.134	809.763	1237.52	120.511	829.138	1238.59	261.087	918.899	1057.94	24.8226	917.553	1081.99	361.298	840.494	1038	198.636	861.4	692.083	-115.618	645.689	792.306	-75.4351	661.198	804.361	1.11341	567.83	808.58	-12.7553	476.414	781.868	10.9942	854.839	707.724	519.969	619.877	796.165	513.578	634.258	797.993	430.278	544.81	823.092	459.312	443.65	782.613	434.213
673	6.72	769.337	1247.44	195.147	809.728	1237.57	120.499	829.126	1238.59	261.073	918.889	1058	24.8084	917.546	1082.02	361.297	840.397	1038.08	198.647	861.377	692.145	-115.596	645.668	792.33	-75.4238	661.172	804.403	1.10573	567.817	808.619	-12.7574	476.434	781.899	11.0041	854.798	707.711	519.957	619.844	796.162	513.564	634.268	798.04	430.291	544.821	823.141	459.316	443.641	782.649	434.216
674	6.73	769.195	1247.53	195.22	809.696	1237.62	120.582	829.172	1238.6	261.126	918.875	1058.03	24.8489	917.534	1082.04	361.357	840.329	1038.16	198.74	861.417	692.189	-115.546	645.616	792.381	-75.3556	661.145	804.449	1.15613	567.787	808.648	-12.6868	476.41	781.927	11.0536	854.753	707.701	519.975	619.828	796.161	513.589	634.304	798.089	430.345	544.825	823.182	459.373	443.647	782.7	434.272
675	6.74	769.233	1247.53	195.284	809.681	1237.64	120.648	829.195	1238.6	261.151	918.871	1058.03	24.9008	917.538	1082.05	361.413	840.308	1038.21	198.798	861.423	692.22	-115.532	645.611	792.41	-75.3151	661.139	804.45	1.21266	567.741	808.659	-12.6101	476.366	781.936	11.1161	854.76	707.691	519.999	619.811	796.148	513.62	634.309	798.112	430.363	544.812	823.188	459.415	443.634	782.728	434.303
676	6.75	769.422	1247.44	195.25	809.789	1237.61	120.621	829.218	1238.61	261.16	918.909	1057.99	24.898	917.576	1082.02	361.412	840.436	1038.15	198.781	861.434	692.178	-115.58	645.675	792.364	-75.3203	661.176	804.396	1.21224	567.769	808.622	-12.6268	476.396	781.903	11.1216	854.741	707.685	520.005	619.813	796.143	513.615	634.309	798.099	430.331	544.841	823.166	459.405	443.647	782.694	434.294
677	6.76	769.552	1247.33	195.202	809.894	1237.55	120.581	829.223	1238.6	261.175	918.94	1057.96	24.876	917.611	1081.98	361.375	840.689	1037.99	198.75	861.498	692.125	-115.645	645.723	792.307	-75.3806	661.243	804.34	1.17557	567.871	808.558	-12.7099	476.451	781.826	11.0631	854.756	707.676	520.007	619.832	796.132	513.607	634.337	798.046	430.286	544.869	823.092	459.37	443.683	782.623	434.261
678	6.77	769.685	1247.27	195.219	809.936	1237.52	120.613	829.236	1238.58	261.207	918.97	1057.94	24.8815	917.625	1081.94	361.377	840.802	1037.91	198.76	861.487	692.107	-115.635	645.733	792.286	-75.3938	661.266	804.319	1.15964	567.884	808.518	-12.718	476.467	781.8	11.0528	854.784	707.687	520.026	619.861	796.131	513.63	634.201	798.109	430.103	544.86	823.061	459.36	443.697	782.573	434.248
679	6.78	769.592	1247.34	195.289	809.938	1237.55	120.669	829.264	1238.56	261.224	918.989	1057.96	24.8969	917.607	1081.93	361.393	840.792	1037.97	198.794	861.444	692.142	-115.591	645.696	792.304	-75.3578	661.23	804.341	1.17808	567.85	808.528	-12.6849	476.45	781.817	11.0612	854.804	707.7	520.026	619.885	796.127	513.632	634.072	798.247	429.937	544.853	823.051	459.37	443.679	782.596	434.254
680	6.79	769.517	1247.38	195.308	809.919	1237.61	120.705	829.271	1238.54	261.235	919.022	1058	24.918	917.59	1081.95	361.404	840.717	1038.07	198.811	861.394	692.202	-115.583	645.646	792.354	-75.3246	661.191	804.37	1.1843	567.823	808.588	-12.6899	476.429	781.847	11.0602	854.836	707.682	520.021	619.923	796.129	513.616	634.314	798.059	430.239	544.844	823.076	459.368	443.637	782.625	434.264
681	6.8	769.486	1247.42	195.351	809.911	1237.64	120.73	829.297	1238.53	261.248	919.025	1058.02	24.9201	917.604	1081.97	361.401	840.676	1038.14	198.806	861.375	692.248	-115.57	645.617	792.398	-75.3269	661.197	804.399	1.18166	567.772	808.626	-12.6831	476.41	781.881	11.0581	854.82	707.671	520.011	619.911	796.132	513.607	634.375	798.037	430.322	544.843	823.107	459.365	443.619	782.663	434.258
682	6.81	769.437	1247.43	195.368	809.936	1237.66	120.775	829.306	1238.54	261.278	919.043	1058.04	24.9439	917.621	1082	361.426	840.706	1038.18	198.827	861.408	692.271	-115.557	645.623	792.42	-75.3107	661.185	804.431	1.1955	567.773	808.662	-12.6833	476.389	781.911	11.0969	854.784	707.664	520.013	619.895	796.134	513.62	634.379	798.05	430.353	544.861	823.143	459.385	443.639	782.676	434.275
683	6.82	769.427	1247.45	195.395	809.949	1237.66	120.805	829.29	1238.54	261.311	919.072	1058.08	24.9462	917.627	1082.01	361.434	840.715	1038.21	198.819	861.435	692.282	-115.553	645.624	792.407	-75.3049	661.174	804.443	1.19168	567.779	808.683	-12.6818	476.414	781.937	11.0774	854.8	707.684	520.018	619.864	796.149	513.625	634.349	798.065	430.353	544.857	823.161	459.386	443.677	782.68	434.27
684	6.83	769.55	1247.44	195.411	809.979	1237.64	120.825	829.294	1238.54	261.33	919.092	1058.1	24.9371	917.64	1082.03	361.421	840.791	1038.23	198.788	861.451	692.289	-115.573	645.638	792.397	-75.329	661.208	804.414	1.15923	567.803	808.664	-12.687	476.445	781.914	11.0369	854.794	707.713	519.996	619.853	796.154	513.608	634.306	798.075	430.331	544.852	823.163	459.352	443.672	782.676	434.252
685	6.84	769.663	1247.41	195.443	810.016	1237.65	120.851	829.284	1238.56	261.351	919.099	1058.11	24.9264	917.677	1082.04	361.42	840.845	1038.27	198.765	861.443	692.287	-115.603	645.674	792.378	-75.3545	661.223	804.388	1.14199	567.836	808.632	-12.7131	476.443	781.892	11.0389	854.819	707.754	520.004	619.873	796.176	513.596	634.278	798.055	430.311	544.823	823.157	459.336	443.662	782.663	434.226
686	6.85	769.569	1247.43	195.527	810.002	1237.65	120.907	829.331	1238.55	261.4	919.098	1058.12	24.9274	917.664	1082.05	361.428	840.94	1038.27	198.801	861.416	692.248	-115.602	645.659	792.38	-75.3356	661.214	804.368	1.15778	567.813	808.607	-12.7158	476.466	781.866	11.0488	854.797	707.771	520.025	619.866	796.179	513.615	634.231	798.047	430.302	544.788	823.137	459.367	443.637	782.647	434.24
687	6.86	769.566	1247.41	195.561	810.006	1237.64	120.941	829.332	1238.53	261.425	919.122	1058.11	24.9397	917.646	1082.04	361.456	841.012	1038.26	198.835	861.408	692.242	-115.59	645.649	792.379	-75.3213	661.209	804.362	1.18339	567.797	808.599	-12.6985	476.478	781.851	11.0361	854.798	707.78	520.029	619.851	796.174	513.62	634.202	798.04	430.298	544.798	823.124	459.372	443.635	782.629	434.251
688	6.87	769.637	1247.36	195.562	810.027	1237.63	120.972	829.338	1238.49	261.428	919.156	1058.09	24.9527	917.684	1082.03	361.463	841.071	1038.24	198.86	861.417	692.261	-115.608	645.695	792.361	-75.3297	661.209	804.352	1.19992	567.84	808.581	-12.6909	476.454	781.847	11.0448	854.783	707.769	520.04	619.807	796.135	513.62	634.24	798.029	430.312	544.812	823.119	459.362	443.663	782.62	434.238
689	6.88	769.663	1247.34	195.583	810.035	1237.64	121.01	829.426	1238.46	261.443	919.207	1058.08	24.9579	917.751	1082.03	361.467	841.14	1038.24	198.87	861.417	692.305	-115.608	645.702	792.357	-75.3139	661.221	804.351	1.21546	567.85	808.567	-12.6844	476.429	781.827	11.0613	854.756	707.759	520.066	619.811	796.096	513.625	634.288	798.038	430.321	544.828	823.106	459.388	443.655	782.624	434.258
690	6.89	769.649	1247.34	195.639	810.082	1237.64	121.039	829.458	1238.44	261.484	919.228	1058.08	24.9761	917.81	1082.06	361.512	841.113	1038.27	198.918	861.441	692.33	-115.588	645.695	792.371	-75.283	661.243	804.348	1.24228	567.869	808.559	-12.656	476.425	781.8	11.0785	854.749	707.737	520.087	619.84	796.072	513.644	634.232	798.154	430.193	544.895	823.094	459.437	443.658	782.633	434.297
691	6.9	769.71	1247.35	195.686	810.125	1237.66	121.031	829.46	1238.46	261.5	919.242	1058.08	24.9858	917.861	1082.07	361.547	841.129	1038.31	198.928	861.433	692.314	-115.576	645.673	792.383	-75.3046	661.255	804.338	1.22823	567.886	808.545	-12.6791	476.456	781.819	11.0739	854.763	707.749	520.083	619.863	796.068	513.627	634.09	798.274	429.998	544.903	823.084	459.421	443.695	782.631	434.3
692	6.91	769.735	1247.39	195.666	810.144	1237.66	121.021	829.503	1238.49	261.506	919.238	1058.08	24.9764	917.9	1082.1	361.54	841.145	1038.34	198.913	861.44	692.328	-115.601	645.694	792.377	-75.3232	661.235	804.355	1.19905	567.842	808.569	-12.7069	476.469	781.859	11.0634	854.788	707.811	520.071	619.86	796.094	513.609	634.333	798.077	430.269	544.898	823.109	459.38	443.688	782.637	434.276
693	6.92	769.722	1247.45	195.625	810.146	1237.68	121.012	829.478	1238.53	261.485	919.216	1058.09	24.9784	917.897	1082.15	361.539	841.082	1038.4	198.875	861.403	692.34	-115.607	645.67	792.395	-75.3394	661.194	804.379	1.18156	567.805	808.601	-12.7402	476.436	781.888	11.044	854.815	707.852	520.075	619.863	796.125	513.595	634.226	798.169	430.172	544.844	823.119	459.334	443.648	782.656	434.258
694	6.93	769.648	1247.51	195.621	810.111	1237.69	121.029	829.458	1238.58	261.498	919.2	1058.14	24.9875	917.884	1082.2	361.571	841.097	1038.41	198.871	861.421	692.337	-115.589	645.665	792.396	-75.3358	661.157	804.392	1.19601	567.793	808.622	-12.7312	476.432	781.891	11.043	854.784	707.9	520.102	619.852	796.149	513.609	634.017	798.341	429.975	544.799	823.133	459.33	443.632	782.678	434.259
695	6.94	769.618	1247.53	195.649	810.101	1237.7	121.055	829.426	1238.61	261.503	919.178	1058.18	25.0103	917.881	1082.23	361.603	841.072	1038.42	198.905	861.39	692.347	-115.553	645.676	792.395	-75.3146	661.171	804.392	1.21597	567.784	808.64	-12.6969	476.435	781.901	11.0618	854.805	707.942	520.115	619.85	796.172	513.632	634.061	798.248	430.096	544.776	823.154	459.35	443.623	782.68	434.269
696	6.95	769.679	1247.5	195.642	810.145	1237.71	121.05	829.371	1238.62	261.487	919.138	1058.2	25.018	917.893	1082.26	361.623	841.115	1038.42	198.923	861.373	692.384	-115.551	645.685	792.399	-75.3084	661.202	804.392	1.22277	567.789	808.637	-12.6749	476.433	781.898	11.0574	854.818	707.944	520.116	619.84	796.167	513.632	633.919	798.36	429.955	544.775	823.148	459.339	443.657	782.657	434.266
697	6.96	769.691	1247.48	195.625	810.199	1237.69	121.026	829.376	1238.63	261.481	919.155	1058.21	25.0158	917.915	1082.25	361.642	841.182	1038.41	198.923	861.414	692.398	-115.568	645.7	792.395	-75.327	661.24	804.385	1.19919	567.817	808.608	-12.6732	476.408	781.889	11.041	854.779	707.941	520.128	619.829	796.144	513.62	634.132	798.143	430.217	544.813	823.128	459.334	443.658	782.645	434.236
698	6.97	769.738	1247.46	195.6	810.228	1237.69	121.014	829.41	1238.62	261.494	919.195	1058.22	25.0081	917.918	1082.25	361.663	841.236	1038.4	198.93	861.42	692.444	-115.601	645.697	792.408	-75.3215	661.245	804.389	1.21209	567.828	808.614	-12.6724	476.431	781.881	11.0507	854.756	707.924	520.146	619.852	796.139	513.629	634.266	798.085	430.312	544.844	823.105	459.357	443.662	782.651	434.231
699	6.98	769.742	1247.46	195.634	810.194	1237.71	121.045	829.447	1238.6	261.527	919.228	1058.25	25.038	917.929	1082.26	361.683	841.195	1038.45	198.967	861.377	692.493	-115.582	645.648	792.429	-75.2848	661.2	804.404	1.25224	567.817	808.634	-12.6451	476.436	781.888	11.0669	854.785	707.917	520.152	619.872	796.139	513.633	634.367	798.062	430.38	544.854	823.099	459.388	443.671	782.67	434.26
700	6.99	769.584	1247.51	195.674	810.184	1237.72	121.095	829.478	1238.56	261.543	919.23	1058.26	25.0606	917.93	1082.25	361.7	841.151	1038.51	199.015	861.358	692.54	-115.562	645.596	792.45	-75.2448	661.159	804.405	1.29096	567.8	808.642	-12.5985	476.396	781.917	11.083	854.816	707.914	520.168	619.886	796.115	513.63	634.254	798.161	430.243	544.848	823.104	459.39	443.656	782.679	434.28
701	7	769.589	1247.47	195.683	810.28	1237.7	121.086	829.47	1238.54	261.551	919.245	1058.26	25.0475	917.934	1082.22	361.702	841.224	1038.48	198.984	861.382	692.545	-115.579	645.628	792.421	-75.2483	661.187	804.383	1.27651	567.792	808.62	-12.6066	476.386	781.896	11.0816	854.805	707.9	520.178	619.899	796.09	513.634	633.915	798.397	429.86	544.846	823.087	459.377	443.656	782.654	434.27
702	7.01	769.719	1247.4	195.714	810.363	1237.66	121.106	829.443	1238.53	261.569	919.273	1058.25	25.039	917.918	1082.21	361.711	841.361	1038.4	198.973	861.39	692.517	-115.609	645.693	792.387	-75.2747	661.217	804.338	1.26117	567.815	808.565	-12.6198	476.411	781.846	11.0854	854.772	707.903	520.22	619.874	796.087	513.665	633.826	798.45	429.765	544.858	823.057	459.393	443.697	782.62	434.262
703	7.02	769.734	1247.35	195.761	810.34	1237.64	121.16	829.414	1238.52	261.596	919.277	1058.27	25.0513	917.891	1082.23	361.722	841.388	1038.35	199.009	861.36	692.493	-115.608	645.69	792.381	-75.2643	661.212	804.313	1.28176	567.811	808.524	-12.6188	476.458	781.826	11.0941	854.744	707.926	520.253	619.82	796.092	513.677	633.783	798.482	429.752	544.83	823.045	459.397	443.67	782.594	434.26
704	7.03	769.662	1247.38	195.785	810.321	1237.65	121.177	829.375	1238.53	261.606	919.272	1058.3	25.0567	917.875	1082.25	361.739	841.403	1038.38	198.996	861.359	692.494	-115.596	645.672	792.38	-75.2405	661.176	804.308	1.28549	567.787	808.539	-12.6139	476.432	781.815	11.0948	854.719	707.958	520.244	619.777	796.108	513.659	633.87	798.391	429.906	544.769	823.063	459.37	443.673	782.609	434.267
705	7.04	769.68	1247.41	195.73	810.337	1237.69	121.171	829.388	1238.53	261.621	919.286	1058.33	25.0282	917.889	1082.27	361.722	841.425	1038.43	198.942	861.387	692.534	-115.58	645.664	792.397	-75.2685	661.164	804.332	1.26608	567.816	808.574	-12.644	476.401	781.842	11.0673	854.711	708.001	520.235	619.755	796.126	513.633	634.14	798.16	430.25	544.74	823.102	459.334	443.669	782.64	434.24
706	7.05	769.756	1247.43	195.718	810.339	1237.73	121.179	829.394	1238.53	261.632	919.281	1058.36	25.0183	917.906	1082.29	361.71	841.401	1038.5	198.922	861.39	692.583	-115.59	645.666	792.415	-75.2968	661.171	804.382	1.25336	567.852	808.6	-12.6754	476.416	781.874	11.0505	854.706	708.031	520.243	619.761	796.15	513.625	634.22	798.126	430.356	544.78	823.14	459.329	443.645	782.662	434.224
707	7.06	769.649	1247.52	195.796	810.286	1237.78	121.237	829.4	1238.55	261.66	919.281	1058.4	25.0381	917.925	1082.34	361.72	841.303	1038.61	198.935	861.379	692.605	-115.577	645.627	792.464	-75.2886	661.156	804.428	1.26481	567.806	808.652	-12.6846	476.374	781.917	11.0585	854.738	708.067	520.259	619.771	796.171	513.622	634.266	798.131	430.403	544.765	823.186	459.339	443.619	782.694	434.238
708	7.07	769.663	1247.51	195.852	810.285	1237.79	121.291	829.445	1238.56	261.695	919.298	1058.42	25.0491	917.946	1082.38	361.745	841.253	1038.65	198.98	861.336	692.613	-115.574	645.602	792.469	-75.264	661.155	804.448	1.27107	567.753	808.659	-12.666	476.362	781.921	11.0742	854.731	708.079	520.247	619.81	796.191	513.636	634.276	798.13	430.416	544.781	823.201	459.348	443.622	782.71	434.268
709	7.08	769.715	1247.45	195.874	810.298	1237.73	121.313	829.483	1238.53	261.716	919.312	1058.4	25.0121	918.013	1082.36	361.739	841.405	1038.6	198.969	861.35	692.602	-115.624	645.644	792.433	-75.2871	661.174	804.419	1.24213	567.758	808.625	-12.6797	476.401	781.893	11.0489	854.743	708.071	520.267	619.847	796.202	513.633	634.252	798.081	430.392	544.826	823.162	459.332	443.654	782.687	434.251
710	7.09	769.824	1247.37	195.902	810.338	1237.68	121.335	829.525	1238.49	261.736	919.313	1058.37	24.9913	918.052	1082.31	361.747	841.6	1038.51	198.94	861.38	692.582	-115.674	645.675	792.403	-75.3028	661.228	804.373	1.21607	567.808	808.602	-12.6922	476.473	781.863	11.0049	854.771	708.081	520.304	619.867	796.173	513.624	634.287	798.028	430.353	544.849	823.106	459.319	443.666	782.646	434.214
711	7.1	769.822	1247.31	195.965	810.373	1237.65	121.363	829.531	1238.45	261.767	919.327	1058.37	25.0042	918.067	1082.31	361.765	841.63	1038.47	198.965	861.388	692.596	-115.674	645.681	792.388	-75.2837	661.243	804.356	1.22806	567.81	808.587	-12.6674	476.494	781.844	11.023	854.791	708.072	520.328	619.868	796.136	513.635	634.196	798.131	430.194	544.849	823.071	459.33	443.679	782.622	434.21
712	7.11	769.887	1247.26	196.061	810.361	1237.66	121.444	829.614	1238.44	261.819	919.378	1058.4	25.0479	918.073	1082.31	361.788	841.654	1038.47	199.032	861.365	692.637	-115.623	645.661	792.412	-75.2375	661.215	804.363	1.27576	567.818	808.58	-12.6077	476.454	781.854	11.0883	854.79	708.037	520.336	619.858	796.111	513.659	633.884	798.398	429.864	544.875	823.067	459.355	443.691	782.635	434.269
713	7.12	769.917	1247.25	196.134	810.34	1237.69	121.524	829.661	1238.42	261.84	919.413	1058.43	25.0712	918.115	1082.34	361.818	841.675	1038.51	199.077	861.342	692.715	-115.602	645.647	792.44	-75.2068	661.197	804.375	1.31657	567.818	808.588	-12.5595	476.444	781.863	11.144	854.78	708.011	520.32	619.873	796.09	513.664	633.995	798.371	429.969	544.88	823.06	459.39	443.697	782.652	434.304
714	7.13	769.855	1247.26	196.166	810.295	1237.68	121.583	829.596	1238.37	261.829	919.384	1058.43	25.0859	918.122	1082.35	361.82	841.574	1038.54	199.094	861.325	692.761	-115.589	645.6	792.442	-75.202	661.185	804.383	1.33138	567.771	808.588	-12.5454	476.403	781.837	11.155	854.765	707.99	520.28	619.85	796.062	513.651	634.315	798.14	430.341	544.868	823.066	459.393	443.651	782.646	434.298
715	7.14	769.826	1247.22	196.12	810.273	1237.66	121.546	829.558	1238.38	261.815	919.354	1058.44	25.0558	918.105	1082.37	361.794	841.525	1038.55	199.047	861.313	692.727	-115.61	645.595	792.433	-75.2277	661.145	804.396	1.30383	567.757	808.585	-12.6005	476.365	781.856	11.1221	854.739	708.016	520.264	619.838	796.077	513.629	634.384	798.065	430.413	544.855	823.077	459.36	443.628	782.63	434.265
716	7.15	769.83	1247.2	196.083	810.279	1237.66	121.504	829.54	1238.4	261.81	919.345	1058.47	25.0325	918.09	1082.4	361.774	841.53	1038.57	198.988	861.371	692.686	-115.644	645.636	792.408	-75.2515	661.164	804.374	1.26649	567.76	808.582	-12.6347	476.387	781.865	11.0953	854.752	708.066	520.275	619.835	796.116	513.616	634.377	798.043	430.401	544.844	823.093	459.327	443.656	782.617	434.239
717	7.16	769.919	1247.16	196.069	810.265	1237.64	121.498	829.481	1238.4	261.808	919.31	1058.49	25.0434	918.073	1082.43	361.768	841.455	1038.59	198.963	861.367	692.672	-115.655	645.629	792.394	-75.263	661.172	804.367	1.25164	567.786	808.592	-12.6533	476.419	781.849	11.0732	854.75	708.113	520.274	619.808	796.145	513.61	634.275	798.044	430.377	544.799	823.094	459.316	443.649	782.612	434.22
718	7.17	769.839	1247.18	196.083	810.263	1237.63	121.488	829.462	1238.4	261.832	919.301	1058.52	25.0539	918.04	1082.45	361.784	841.402	1038.63	198.949	861.337	692.691	-115.626	645.618	792.413	-75.2796	661.194	804.365	1.23832	567.794	808.592	-12.6453	476.403	781.874	11.0592	854.702	708.169	520.295	619.789	796.174	513.626	634.187	798.061	430.362	544.76	823.116	459.32	443.633	782.629	434.23
719	7.18	769.791	1247.2	196.102	810.281	1237.65	121.473	829.437	1238.4	261.841	919.314	1058.54	25.0576	918.043	1082.47	361.799	841.413	1038.66	198.946	861.342	692.739	-115.623	645.61	792.436	-75.2716	661.19	804.392	1.25139	567.788	808.596	-12.6283	476.42	781.896	11.0744	854.644	708.174	520.303	619.76	796.16	513.626	634.09	798.216	430.221	544.747	823.127	459.317	443.67	782.647	434.237
720	7.19	769.772	1247.2	196.107	810.276	1237.66	121.513	829.436	1238.39	261.831	919.325	1058.56	25.0618	918.014	1082.5	361.816	841.45	1038.72	198.982	861.324	692.801	-115.618	645.615	792.456	-75.2405	661.2	804.417	1.29219	567.808	808.618	-12.579	476.388	781.909	11.1033	854.66	708.157	520.323	619.762	796.15	513.63	633.965	798.405	430.041	544.786	823.154	459.339	443.676	782.668	434.263
721	7.2	769.68	1247.21	196.145	810.225	1237.66	121.546	829.456	1238.37	261.816	919.326	1058.57	25.0709	918.004	1082.51	361.838	841.393	1038.76	199.001	861.298	692.823	-115.6	645.596	792.459	-75.2001	661.174	804.442	1.32339	567.774	808.631	-12.5549	476.397	781.905	11.1194	854.7	708.148	520.308	619.799	796.146	513.631	634.238	798.197	430.339	544.778	823.141	459.353	443.648	782.679	434.293
722	7.21	769.635	1247.17	196.064	810.235	1237.62	121.474	829.414	1238.33	261.793	919.328	1058.54	25.0488	918.035	1082.49	361.812	841.314	1038.73	198.951	861.352	692.777	-115.633	645.601	792.418	-75.2471	661.147	804.424	1.28198	567.776	808.617	-12.596	476.449	781.872	11.0684	854.694	708.139	520.302	619.817	796.125	513.616	634.321	798.094	430.39	544.793	823.098	459.322	443.625	782.657	434.26
723	7.22	769.7	1247.12	195.994	810.268	1237.56	121.373	829.402	1238.3	261.772	919.331	1058.51	25.0039	918.033	1082.47	361.773	841.425	1038.67	198.888	861.371	692.705	-115.687	645.63	792.381	-75.3024	661.163	804.387	1.22722	567.806	808.571	-12.6665	476.433	781.824	11.0374	854.717	708.151	520.304	619.822	796.115	513.605	634.375	798.012	430.377	544.817	823.061	459.276	443.633	782.613	434.227
724	7.23	769.662	1247.1	195.99	810.272	1237.53	121.36	829.441	1238.31	261.777	919.337	1058.48	25.009	918.005	1082.49	361.776	841.425	1038.63	198.876	861.381	692.655	-115.695	645.647	792.361	-75.2829	661.199	804.347	1.22923	567.817	808.534	-12.6684	476.429	781.817	11.0606	854.758	708.154	520.297	619.847	796.122	513.6	634.234	798.09	430.211	544.831	823.055	459.278	443.653	782.588	434.239
725	7.24	769.613	1247.09	196.01	810.228	1237.53	121.41	829.457	1238.32	261.776	919.341	1058.52	25.0191	917.944	1082.5	361.793	841.416	1038.63	198.916	861.372	692.667	-115.675	645.643	792.369	-75.2455	661.192	804.355	1.29101	567.837	808.522	-12.6228	476.397	781.822	11.1161	854.779	708.165	520.316	619.872	796.12	513.613	634.043	798.277	430.036	544.802	823.063	459.305	443.651	782.587	434.25
726	7.25	769.66	1247.08	196.023	810.196	1237.54	121.433	829.471	1238.32	261.78	919.315	1058.55	25.0195	917.899	1082.54	361.799	841.415	1038.66	198.95	861.325	692.735	-115.656	645.623	792.411	-75.223	661.2	804.389	1.30425	567.813	808.552	-12.5932	476.397	781.846	11.1161	854.724	708.18	520.342	619.831	796.131	513.619	634.118	798.238	430.162	544.805	823.084	459.332	443.646	782.63	434.276
727	7.26	769.634	1247.09	196.036	810.186	1237.57	121.438	829.473	1238.33	261.779	919.289	1058.58	25.0319	917.875	1082.59	361.807	841.333	1038.74	198.956	861.316	692.807	-115.632	645.606	792.463	-75.2104	661.206	804.407	1.30721	567.812	808.608	-12.5462	476.433	781.885	11.1228	854.682	708.212	520.358	619.794	796.133	513.619	633.939	798.384	430.034	544.812	823.112	459.357	443.664	782.669	434.298
728	7.27	769.502	1247.13	196.029	810.143	1237.58	121.442	829.434	1238.32	261.759	919.272	1058.62	25.0427	917.851	1082.64	361.832	841.308	1038.78	198.962	861.339	692.814	-115.6	645.573	792.475	-75.1951	661.171	804.43	1.32257	567.751	808.64	-12.5273	476.408	781.916	11.1616	854.636	708.26	520.358	619.812	796.16	513.622	634.16	798.228	430.332	544.795	823.139	459.354	443.645	782.683	434.293
729	7.28	769.493	1247.15	195.977	810.148	1237.58	121.381	829.401	1238.33	261.736	919.264	1058.61	25.0093	917.816	1082.65	361.797	841.276	1038.79	198.885	861.349	692.77	-115.61	645.584	792.471	-75.2313	661.163	804.441	1.28916	567.767	808.643	-12.5825	476.416	781.909	11.1163	854.624	708.308	520.366	619.803	796.194	513.615	634.239	798.157	430.397	544.783	823.156	459.33	443.639	782.674	434.26
730	7.29	769.488	1247.14	195.86	810.164	1237.55	121.262	829.304	1238.33	261.692	919.219	1058.57	24.9382	917.815	1082.66	361.737	841.191	1038.81	198.761	861.362	692.728	-115.672	645.594	792.455	-75.2928	661.185	804.417	1.2035	567.805	808.629	-12.6822	476.392	781.887	11.0695	854.607	708.322	520.363	619.759	796.184	513.58	634.277	798.094	430.394	544.753	823.114	459.279	443.636	782.65	434.209
731	7.3	769.454	1247.13	195.824	810.138	1237.52	121.249	829.31	1238.29	261.659	919.219	1058.56	24.9015	917.803	1082.66	361.703	841.209	1038.79	198.736	861.341	692.701	-115.696	645.583	792.427	-75.3056	661.175	804.39	1.18612	567.777	808.592	-12.6977	476.371	781.863	11.0809	854.612	708.293	520.34	619.794	796.166	513.558	634.311	798.058	430.399	544.755	823.083	459.232	443.628	782.619	434.191
732	7.31	769.557	1247.07	195.884	810.09	1237.51	121.319	829.38	1238.28	261.683	919.247	1058.54	24.9452	917.781	1082.64	361.72	841.21	1038.8	198.802	861.294	692.724	-115.669	645.558	792.422	-75.2526	661.139	804.387	1.25582	567.745	808.586	-12.6302	476.375	781.851	11.1231	854.717	708.304	520.371	619.846	796.14	513.56	634.33	798.029	430.416	544.794	823.061	459.27	443.637	782.599	434.239
733	7.32	769.649	1247	195.929	810.082	1237.5	121.357	829.4	1238.26	261.714	919.26	1058.52	24.9747	917.79	1082.66	361.735	841.242	1038.8	198.84	861.291	692.75	-115.657	645.582	792.429	-75.2143	661.14	804.388	1.31167	567.772	808.571	-12.5551	476.396	781.82	11.1415	854.751	708.322	520.397	619.856	796.109	513.591	634.379	797.998	430.439	544.832	823.033	459.323	443.646	782.585	434.275
734	7.33	769.633	1246.97	195.943	810.073	1237.49	121.335	829.388	1238.24	261.704	919.256	1058.52	24.9542	917.801	1082.7	361.736	841.222	1038.81	198.844	861.299	692.762	-115.662	645.573	792.438	-75.2145	661.162	804.383	1.30206	567.732	808.572	-12.5596	476.376	781.833	11.1617	854.713	708.341	520.422	619.831	796.09	513.595	634.408	798.013	430.448	544.815	823.032	459.324	443.644	782.586	434.275
735	7.34	769.584	1246.99	195.912	810.082	1237.48	121.326	829.356	1238.25	261.68	919.224	1058.54	24.9351	917.798	1082.75	361.718	841.192	1038.85	198.853	861.288	692.787	-115.693	645.586	792.431	-75.212	661.195	804.391	1.27653	567.742	808.571	-12.5689	476.385	781.834	11.1585	854.662	708.392	520.439	619.806	796.116	513.597	634.367	798.057	430.441	544.803	823.066	459.321	443.637	782.607	434.264
736	7.35	769.547	1247.03	195.9	810.098	1237.49	121.29	829.339	1238.28	261.675	919.196	1058.58	24.9214	917.757	1082.78	361.714	841.168	1038.9	198.834	861.29	692.777	-115.709	645.606	792.422	-75.2216	661.203	804.393	1.26988	567.784	808.566	-12.562	476.425	781.848	11.144	854.599	708.472	520.465	619.803	796.16	513.593	634.155	798.227	430.255	544.777	823.103	459.311	443.644	782.632	434.255
737	7.36	769.582	1247.05	195.892	810.123	1237.5	121.259	829.3	1238.3	261.682	919.185	1058.61	24.917	917.743	1082.85	361.714	841.174	1038.95	198.809	861.298	692.773	-115.706	645.613	792.437	-75.2382	661.205	804.409	1.26522	567.837	808.581	-12.598	476.45	781.861	11.1347	854.561	708.541	520.489	619.753	796.185	513.6	633.931	798.413	430.049	544.759	823.137	459.307	443.666	782.652	434.271
738	7.37	769.473	1247.08	195.86	810.014	1237.51	121.261	829.27	1238.31	261.66	919.135	1058.63	24.9047	917.693	1082.89	361.712	841.065	1038.99	198.777	861.293	692.783	-115.696	645.572	792.445	-75.2443	661.161	804.437	1.24968	567.799	808.609	-12.6015	476.412	781.864	11.1348	854.537	708.581	520.486	619.748	796.193	513.596	634.121	798.241	430.326	544.68	823.144	459.292	443.606	782.668	434.264
739	7.38	769.435	1247.07	195.846	809.942	1237.51	121.259	829.273	1238.33	261.643	919.089	1058.63	24.8789	917.644	1082.9	361.702	840.982	1039.02	198.79	861.263	692.784	-115.664	645.529	792.449	-75.2442	661.139	804.437	1.26598	567.719	808.609	-12.5866	476.398	781.846	11.1349	854.523	708.597	520.454	619.751	796.178	513.583	634.165	798.174	430.382	544.653	823.125	459.28	443.57	782.656	434.243
740	7.39	769.466	1247.06	195.867	809.928	1237.5	121.264	829.319	1238.31	261.639	919.086	1058.62	24.8754	917.672	1082.9	361.679	840.996	1039	198.779	861.274	692.763	-115.637	645.56	792.448	-75.254	661.159	804.428	1.268	567.721	808.612	-12.5824	476.391	781.867	11.1441	854.591	708.609	520.443	619.776	796.164	513.558	634.174	798.115	430.393	544.709	823.113	459.287	443.59	782.65	434.239
741	7.4	769.41	1247.08	195.916	809.979	1237.48	121.284	829.366	1238.3	261.653	919.117	1058.6	24.8769	917.7	1082.91	361.686	841.058	1038.97	198.78	861.268	692.732	-115.636	645.592	792.443	-75.2401	661.162	804.422	1.28063	567.708	808.589	-12.5522	476.363	781.864	11.1679	854.684	708.591	520.446	619.807	796.149	513.555	634.22	798.061	430.416	544.735	823.088	459.28	443.617	782.639	434.263
742	7.41	769.514	1247.02	195.912	809.954	1237.48	121.278	829.367	1238.28	261.661	919.126	1058.57	24.873	917.722	1082.91	361.693	841.057	1038.96	198.768	861.252	692.722	-115.669	645.573	792.433	-75.2298	661.137	804.418	1.3035	567.717	808.577	-12.5586	476.327	781.857	11.1718	854.711	708.571	520.445	619.842	796.137	513.574	634.287	798.027	430.433	544.757	823.06	459.291	443.619	782.621	434.258
743	7.42	769.614	1246.94	195.934	809.988	1237.45	121.266	829.37	1238.24	261.665	919.143	1058.57	24.8554	917.749	1082.9	361.684	841.139	1038.94	198.751	861.299	692.692	-115.699	645.611	792.395	-75.2443	661.162	804.377	1.31402	567.756	808.545	-12.5591	476.335	781.823	11.17	854.723	708.581	520.466	619.847	796.126	513.58	634.344	798.023	430.423	544.796	823.025	459.301	443.628	782.593	434.253
744	7.43	769.628	1246.92	195.905	810.053	1237.42	121.243	829.37	1238.23	261.653	919.175	1058.56	24.8322	917.771	1082.9	361.663	841.282	1038.89	198.708	861.314	692.683	-115.735	645.688	792.376	-75.2782	661.192	804.341	1.28431	567.794	808.536	-12.5851	476.406	781.811	11.1456	854.742	708.611	520.493	619.832	796.127	513.573	634.365	798.021	430.401	544.829	823.018	459.271	443.649	782.575	434.238
745	7.44	769.63	1246.91	195.865	809.995	1237.43	121.251	829.343	1238.23	261.661	919.151	1058.58	24.8296	917.746	1082.93	361.671	841.206	1038.94	198.716	861.279	692.704	-115.717	645.653	792.407	-75.2684	661.18	804.356	1.26567	567.788	808.552	-12.5858	476.412	781.845	11.1481	854.701	708.645	520.504	619.817	796.143	513.562	634.343	798.034	430.401	544.786	823.05	459.269	443.642	782.579	434.249
746	7.45	769.419	1247	195.883	809.868	1237.47	121.284	829.298	1238.25	261.646	919.083	1058.62	24.8246	917.69	1082.98	361.684	840.963	1039.05	198.714	861.208	692.792	-115.67	645.552	792.454	-75.2366	661.111	804.408	1.27271	567.721	808.617	-12.5882	476.328	781.887	11.1484	854.616	708.655	520.468	619.778	796.151	513.545	634.335	798.068	430.436	544.703	823.089	459.256	443.575	782.622	434.251
747	7.46	769.422	1246.99	195.862	809.83	1237.5	121.297	829.279	1238.24	261.638	919.086	1058.66	24.8309	917.681	1083.03	361.698	840.896	1039.11	198.722	861.221	692.853	-115.65	645.509	792.497	-75.2018	661.099	804.45	1.28783	567.657	808.651	-12.5653	476.311	781.924	11.1717	854.608	708.674	520.447	619.763	796.16	513.541	634.327	798.114	430.458	544.663	823.115	459.252	443.563	782.668	434.254
748	7.47	769.442	1246.96	195.892	809.88	1237.49	121.316	829.302	1238.24	261.652	919.128	1058.69	24.839	917.718	1083.07	361.708	840.882	1039.15	198.752	861.261	692.873	-115.638	645.529	792.511	-75.2056	661.134	804.46	1.30492	567.692	808.654	-12.5204	476.343	781.933	11.1792	854.631	708.703	520.474	619.764	796.166	513.54	634.304	798.132	430.449	544.701	823.141	459.267	443.599	782.681	434.257
749	7.48	769.407	1246.95	195.98	809.903	1237.45	121.355	829.315	1238.23	261.674	919.168	1058.7	24.8614	917.696	1083.06	361.732	840.967	1039.13	198.817	861.25	692.873	-115.647	645.564	792.486	-75.1716	661.145	804.44	1.34016	567.733	808.599	-12.4872	476.34	781.903	11.2169	854.635	708.697	520.486	619.802	796.172	513.548	634.291	798.127	430.449	544.75	823.119	459.297	443.614	782.658	434.28
750	7.49	769.401	1246.89	196.009	809.949	1237.4	121.359	829.334	1238.21	261.7	919.164	1058.7	24.8624	917.688	1083.05	361.727	841.042	1039.08	198.831	861.242	692.86	-115.66	645.572	792.443	-75.1716	661.142	804.402	1.34669	567.721	808.58	-12.4936	476.35	781.859	11.216	854.614	708.687	520.492	619.796	796.159	513.556	634.27	798.104	430.447	544.759	823.081	459.305	443.615	782.627	434.28
751	7.5	769.56	1246.81	195.988	810.056	1237.35	121.351	829.344	1238.18	261.709	919.164	1058.67	24.8558	917.728	1083.02	361.699	841.192	1038.99	198.79	861.28	692.807	-115.694	645.63	792.402	-75.2245	661.204	804.355	1.31647	567.78	808.518	-12.5212	476.43	781.805	11.1687	854.634	708.687	520.519	619.8	796.14	513.571	634.258	798.071	430.414	544.775	823.015	459.274	443.649	782.583	434.256
752	7.51	769.588	1246.8	195.951	810.071	1237.34	121.32	829.318	1238.16	261.69	919.167	1058.66	24.8231	917.752	1083.01	361.681	841.253	1038.97	198.738	861.33	692.773	-115.731	645.649	792.381	-75.2553	661.226	804.331	1.29489	567.815	808.519	-12.5601	476.43	781.778	11.1523	854.629	708.707	520.516	619.788	796.152	513.544	634.243	798.039	430.38	544.75	823.011	459.24	443.63	782.564	434.232
753	7.52	769.511	1246.81	195.957	810.006	1237.35	121.333	829.301	1238.14	261.697	919.157	1058.69	24.8007	917.714	1083.04	361.696	841.161	1039.03	198.695	861.292	692.792	-115.716	645.586	792.399	-75.2352	661.195	804.357	1.2865	567.738	808.557	-12.547	476.37	781.809	11.1578	854.607	708.75	520.5	619.758	796.178	513.52	634.187	798.04	430.369	544.724	823.044	459.233	443.601	782.564	434.228
754	7.53	769.425	1246.86	195.964	809.932	1237.38	121.336	829.278	1238.15	261.707	919.116	1058.72	24.7737	917.669	1083.07	361.693	840.996	1039.11	198.666	861.235	692.819	-115.692	645.517	792.431	-75.2462	661.111	804.406	1.26838	567.68	808.576	-12.557	476.305	781.848	11.1573	854.578	708.796	520.507	619.743	796.188	513.521	634.179	798.051	430.396	544.678	823.063	459.21	443.564	782.59	434.229
755	7.54	769.431	1246.88	195.994	809.945	1237.42	121.362	829.304	1238.16	261.727	919.133	1058.74	24.7845	917.662	1083.1	361.695	840.961	1039.2	198.69	861.201	692.857	-115.691	645.553	792.455	-75.2523	661.096	804.428	1.27489	567.697	808.59	-12.5699	476.304	781.874	11.1743	854.598	708.822	520.532	619.753	796.208	513.547	634.207	798.064	430.423	544.69	823.088	459.22	443.57	782.618	434.235
756	7.55	769.373	1246.94	196.049	809.956	1237.45	121.423	829.387	1238.16	261.76	919.199	1058.77	24.804	917.7	1083.15	361.71	841	1039.26	198.737	861.206	692.912	-115.681	645.553	792.471	-75.215	661.119	804.449	1.29889	567.708	808.625	-12.5627	476.353	781.883	11.1669	854.617	708.834	520.565	619.78	796.204	513.557	634.272	798.104	430.453	544.728	823.112	459.247	443.593	782.647	434.247
757	7.56	769.497	1246.92	196.127	809.997	1237.45	121.488	829.442	1238.15	261.794	919.224	1058.78	24.8429	917.749	1083.16	361.726	841.047	1039.27	198.797	861.186	692.948	-115.67	645.553	792.481	-75.178	661.134	804.444	1.31533	567.711	808.621	-12.5382	476.363	781.885	11.1985	854.629	708.831	520.587	619.779	796.162	513.553	634.31	798.123	430.466	544.765	823.094	459.273	443.616	782.667	434.272
758	7.57	769.668	1246.86	196.155	810.038	1237.46	121.512	829.475	1238.13	261.831	919.221	1058.77	24.8551	917.77	1083.16	361.736	841.126	1039.26	198.805	861.208	692.95	-115.7	645.588	792.478	-75.1819	661.14	804.435	1.30816	567.763	808.591	-12.5248	476.382	781.872	11.2013	854.609	708.807	520.579	619.815	796.149	513.565	634.399	798.124	430.494	544.804	823.078	459.281	443.648	782.666	434.288
759	7.58	769.746	1246.84	196.17	810.091	1237.46	121.536	829.486	1238.13	261.843	919.257	1058.76	24.8572	917.785	1083.16	361.739	841.193	1039.22	198.796	861.274	692.939	-115.722	645.602	792.467	-75.1893	661.183	804.406	1.30153	567.838	808.577	-12.5265	476.405	781.857	11.1922	854.636	708.813	520.567	619.825	796.137	513.565	634.445	798.095	430.493	544.806	823.045	459.273	443.669	782.642	434.282
760	7.59	769.782	1246.83	196.142	810.087	1237.45	121.546	829.45	1238.15	261.83	919.232	1058.75	24.8343	917.792	1083.18	361.733	841.126	1039.21	198.775	861.291	692.93	-115.726	645.572	792.449	-75.2008	661.163	804.407	1.29992	567.801	808.577	-12.5259	476.387	781.844	11.1867	854.609	708.833	520.546	619.805	796.135	513.554	634.383	798.08	430.455	544.742	823.02	459.239	443.617	782.619	434.245
761	7.6	769.695	1246.85	196.156	810.036	1237.45	121.576	829.449	1238.15	261.844	919.187	1058.77	24.835	917.771	1083.19	361.727	841.055	1039.19	198.754	861.234	692.932	-115.718	645.541	792.448	-75.209	661.129	804.407	1.30256	567.723	808.584	-12.5219	476.368	781.845	11.1831	854.573	708.855	520.543	619.784	796.142	513.547	634.275	798.077	430.428	544.693	823.034	459.231	443.582	782.589	434.223
762	7.61	769.634	1246.87	196.194	810.028	1237.44	121.584	829.452	1238.16	261.871	919.146	1058.8	24.8383	917.718	1083.2	361.737	840.988	1039.2	198.762	861.208	692.944	-115.714	645.542	792.448	-75.216	661.095	804.4	1.29779	567.715	808.57	-12.5461	476.361	781.823	11.1823	854.506	708.876	520.549	619.748	796.155	513.546	634.212	798.085	430.418	544.632	823.031	459.212	443.584	782.582	434.223
763	7.62	769.685	1246.86	196.255	810.061	1237.45	121.632	829.442	1238.18	261.895	919.1	1058.81	24.8531	917.675	1083.21	361.762	840.955	1039.2	198.786	861.211	692.94	-115.717	645.531	792.438	-75.1964	661.077	804.389	1.32335	567.675	808.544	-12.5454	476.33	781.814	11.1927	854.477	708.91	520.578	619.73	796.161	513.555	634.156	798.081	430.42	544.605	823.024	459.212	443.576	782.56	434.231
764	7.63	769.746	1246.85	196.261	810.115	1237.46	121.64	829.459	1238.21	261.905	919.077	1058.82	24.8436	917.718	1083.23	361.765	840.951	1039.16	198.786	861.225	692.943	-115.725	645.537	792.425	-75.207	661.115	804.375	1.31412	567.71	808.518	-12.5314	476.341	781.821	11.1608	854.47	708.93	520.577	619.709	796.166	513.547	634.148	798.097	430.404	544.606	823.029	459.197	443.594	782.553	434.226
765	7.64	769.83	1246.88	196.274	810.16	1237.49	121.639	829.523	1238.22	261.936	919.096	1058.84	24.8397	917.771	1083.28	361.772	841.015	1039.14	198.757	861.249	692.972	-115.763	645.59	792.435	-75.2301	661.17	804.389	1.27685	567.75	808.545	-12.5494	476.342	781.834	11.1413	854.507	708.925	520.574	619.723	796.174	513.537	634.205	798.098	430.405	544.672	823.049	459.21	443.641	782.569	434.228
766	7.65	769.885	1246.95	196.299	810.207	1237.55	121.656	829.597	1238.23	261.963	919.141	1058.85	24.8562	917.815	1083.33	361.813	841.016	1039.2	198.775	861.227	693.045	-115.763	645.569	792.492	-75.211	661.165	804.444	1.30055	567.751	808.609	-12.5433	476.328	781.877	11.1644	854.586	708.94	520.582	619.776	796.16	513.545	634.348	798.11	430.455	544.746	823.097	459.237	443.652	782.618	434.249
767	7.66	769.823	1247.03	196.355	810.145	1237.6	121.741	829.678	1238.24	261.984	919.163	1058.87	24.902	917.823	1083.36	361.874	840.851	1039.34	198.832	861.174	693.123	-115.691	645.529	792.546	-75.1478	661.114	804.48	1.35552	567.69	808.66	-12.4881	476.294	781.936	11.243	854.669	708.941	520.582	619.851	796.161	513.557	634.426	798.113	430.513	544.809	823.118	459.282	443.594	782.67	434.283
768	7.67	769.517	1247.18	196.412	810.113	1237.67	121.81	829.745	1238.25	261.997	919.177	1058.89	24.9436	917.795	1083.4	361.896	840.65	1039.46	198.85	861.157	693.176	-115.61	645.504	792.591	-75.1098	661.079	804.508	1.37676	567.642	808.71	-12.4827	476.312	781.95	11.2722	854.674	708.916	520.559	619.913	796.156	513.537	634.424	798.118	430.536	544.839	823.141	459.3	443.496	782.702	434.3
[truncated: 3 more columns]

## Sheet: Trial01
PathFileType	4	(X/Y/Z)	Trial01.trc
DataRate	CameraRate	NumFrames	NumMarkers	Units	OrigDataRate	OrigDataStartFrame	OrigNumFrames
100	100	1632	16	mm	100	1	1632
Frame#	Time	nasion			r zyg pr			l zyg pr			r should			l should			sternum			r elbow			r ulna			r radius			r hand			r finger			l elbow			l ulna			l radius			l hand			l finger
		X1	Y1	Z1	X2	Y2	Z2	X3	Y3	Z3	X4	Y4	Z4	X5	Y5	Z5	X6	Y6	Z6	X7	Y7	Z7	X8	Y8	Z8	X9	Y9	Z9	X10	Y10	Z10	X11	Y11	Z11	X12	Y12	Z12	X13	Y13	Z13	X14	Y14	Z14	X15	Y15	Z15	X16	Y16	Z16
1	0	766.737	1230.03	193.283	803.758	1229.01	119.154	823.265	1226.69	260.072	925.881	1046.49	17.7684	923.456	1081.72	359.849	845.597	1034.08	195.193	862.436	683.6	-122.769	646.31	792.332	-119.73	649.336	802.979	-41.3231	559.135	805.578	-68.0126	466.402	781.134	-55.9525	851.865	706.202	509.727	616.035	797.393	487.025	638.027	795.92	405.5	545.085	821.237	426.749	447.565	781.756	400.669
2	0.01	766.721	1230.09	193.304	803.8	1229.05	119.106	823.227	1226.74	260.067	925.895	1046.51	17.7495	923.461	1081.74	359.803	845.543	1034.12	195.187	862.478	683.634	-122.814	646.254	792.383	-119.756	649.374	802.994	-41.3555	559.122	805.558	-68.0337	466.419	781.162	-55.9691	851.761	706.19	509.698	616.007	797.369	487.01	638.075	795.928	405.479	545.099	821.243	426.722	447.56	781.797	400.658
3	0.02	766.662	1230.15	193.334	803.842	1229.08	119.13	823.262	1226.78	260.113	925.917	1046.53	17.764	923.488	1081.76	359.806	845.518	1034.17	195.224	862.532	683.692	-122.842	646.267	792.403	-119.749	649.415	802.985	-41.3495	559.117	805.549	-68.0069	466.398	781.164	-55.9553	851.719	706.188	509.706	615.979	797.375	487.018	638.078	795.951	405.485	545.105	821.265	426.724	447.57	781.826	400.678
4	0.03	766.604	1230.21	193.359	803.851	1229.12	119.15	823.247	1226.8	260.144	925.939	1046.55	17.7931	923.508	1081.79	359.835	845.43	1034.22	195.27	862.534	683.732	-122.823	646.263	792.428	-119.74	649.412	802.983	-41.319	559.12	805.584	-67.9763	466.366	781.178	-55.9198	851.644	706.154	509.711	615.973	797.375	487.028	638.128	795.974	405.519	545.082	821.28	426.733	447.524	781.85	400.677
5	0.04	766.609	1230.24	193.384	803.836	1229.13	119.166	823.221	1226.84	260.158	925.933	1046.56	17.806	923.494	1081.81	359.855	845.414	1034.19	195.308	862.499	683.743	-122.814	646.232	792.446	-119.723	649.363	803.003	-41.2891	559.111	805.601	-67.9605	466.334	781.193	-55.9286	851.621	706.113	509.709	615.986	797.362	487.031	638.135	795.995	405.519	545.087	821.276	426.749	447.533	781.852	400.676
6	0.05	766.603	1230.24	193.38	803.835	1229.13	119.161	823.229	1226.86	260.151	925.934	1046.55	17.7919	923.504	1081.81	359.847	845.427	1034.15	195.315	862.477	683.765	-122.848	646.22	792.45	-119.731	649.369	802.985	-41.3013	559.092	805.599	-67.976	466.339	781.197	-55.9651	851.645	706.11	509.713	615.978	797.339	487.024	638.13	795.981	405.497	545.11	821.272	426.735	447.531	781.85	400.655
7	0.06	766.665	1230.2	193.398	803.871	1229.11	119.169	823.243	1226.85	260.157	925.953	1046.53	17.8064	923.557	1081.8	359.879	845.495	1034.1	195.321	862.476	683.733	-122.869	646.25	792.433	-119.727	649.433	802.953	-41.3252	559.097	805.577	-67.9965	466.403	781.17	-55.9789	851.658	706.105	509.739	616.008	797.322	487.038	638.188	795.942	405.504	545.133	821.25	426.734	447.569	781.821	400.66
8	0.07	766.732	1230.15	193.396	803.926	1229.07	119.175	823.243	1226.8	260.125	925.942	1046.52	17.8137	923.579	1081.78	359.893	845.537	1034.05	195.313	862.501	683.696	-122.848	646.286	792.407	-119.721	649.468	802.918	-41.3356	559.122	805.558	-67.9814	466.404	781.153	-55.9741	851.676	706.093	509.741	616.023	797.314	487.048	638.228	795.908	405.508	545.145	821.216	426.73	447.559	781.799	400.653
9	0.08	766.824	1230.09	193.381	803.953	1229.01	119.154	823.257	1226.77	260.095	925.935	1046.51	17.8141	923.589	1081.74	359.885	845.615	1034	195.312	862.498	683.674	-122.863	646.327	792.378	-119.728	649.478	802.895	-41.3374	559.159	805.499	-67.9851	466.398	781.134	-55.9558	851.672	706.073	509.736	616.024	797.31	487.045	638.235	795.888	405.488	545.153	821.197	426.731	447.582	781.771	400.649
10	0.09	766.93	1230.04	193.369	803.993	1229	119.13	823.283	1226.78	260.102	925.943	1046.51	17.8143	923.612	1081.73	359.887	845.681	1033.97	195.318	862.503	683.692	-122.898	646.342	792.368	-119.721	649.491	802.89	-41.3536	559.195	805.46	-67.996	466.42	781.107	-55.975	851.693	706.081	509.757	616.032	797.312	487.047	638.211	795.882	405.465	545.173	821.19	426.738	447.59	781.747	400.635
11	0.1	766.952	1230.07	193.387	804.027	1229.03	119.156	823.341	1226.8	260.136	925.962	1046.55	17.8513	923.643	1081.76	359.923	845.676	1033.97	195.362	862.513	683.734	-122.873	646.344	792.389	-119.695	649.486	802.905	-41.3211	559.238	805.479	-67.9965	466.446	781.111	-55.9853	851.689	706.073	509.777	616.027	797.307	487.058	638.188	795.922	405.47	545.192	821.204	426.762	447.616	781.756	400.649
12	0.11	766.819	1230.16	193.382	804.033	1229.06	119.181	823.293	1226.81	260.153	925.971	1046.61	17.8657	923.636	1081.79	359.944	845.555	1034.08	195.381	862.509	683.835	-122.835	646.312	792.429	-119.665	649.46	802.944	-41.2792	559.167	805.529	-67.9678	466.423	781.161	-55.9819	851.664	706.05	509.748	616.015	797.297	487.061	638.182	795.959	405.513	545.194	821.234	426.763	447.585	781.817	400.676
13	0.12	766.704	1230.22	193.427	804.018	1229.1	119.209	823.248	1226.84	260.172	925.961	1046.66	17.8662	923.606	1081.8	359.942	845.517	1034.14	195.403	862.482	683.913	-122.816	646.274	792.456	-119.654	649.402	802.986	-41.2815	559.097	805.562	-67.9343	466.408	781.197	-55.9954	851.629	706.052	509.728	616.007	797.313	487.059	638.16	796.003	405.535	545.183	821.257	426.771	447.569	781.859	400.692
14	0.13	766.654	1230.26	193.441	804.012	1229.16	119.222	823.282	1226.88	260.206	925.931	1046.7	17.862	923.583	1081.81	359.944	845.467	1034.19	195.401	862.459	683.96	-122.773	646.254	792.496	-119.664	649.373	803.039	-41.2767	559.077	805.586	-67.9331	466.39	781.231	-55.9922	851.664	706.091	509.723	615.983	797.338	487.037	638.199	796.023	405.555	545.167	821.29	426.771	447.528	781.882	400.671
15	0.14	766.669	1230.25	193.443	804.029	1229.17	119.257	823.263	1226.89	260.255	925.924	1046.71	17.8625	923.595	1081.82	359.955	845.438	1034.19	195.369	862.475	683.968	-122.75	646.235	792.522	-119.668	649.357	803.044	-41.2706	559.08	805.601	-67.9324	466.397	781.236	-56.0016	851.655	706.102	509.72	615.962	797.357	487.036	638.167	796.024	405.54	545.105	821.304	426.753	447.536	781.877	400.668
16	0.15	766.66	1230.25	193.432	804.062	1229.17	119.246	823.238	1226.83	260.234	925.929	1046.71	17.8594	923.584	1081.78	359.933	845.442	1034.15	195.342	862.478	683.931	-122.774	646.229	792.523	-119.681	649.386	803.013	-41.2974	559.067	805.603	-67.9684	466.398	781.223	-56.0188	851.656	706.106	509.718	615.954	797.354	487.027	638.149	795.986	405.501	545.061	821.294	426.725	447.533	781.857	400.632
17	0.16	766.73	1230.2	193.425	804.043	1229.17	119.256	823.271	1226.78	260.238	925.959	1046.71	17.8411	923.559	1081.75	359.923	845.517	1034.09	195.335	862.511	683.893	-122.833	646.265	792.498	-119.715	649.406	802.985	-41.3195	559.083	805.586	-68.0272	466.414	781.201	-56.0443	851.673	706.095	509.722	615.991	797.357	487.022	638.171	795.931	405.465	545.094	821.27	426.712	447.537	781.838	400.604
18	0.17	766.849	1230.15	193.441	804.035	1229.17	119.267	823.28	1226.73	260.25	925.99	1046.68	17.8271	923.608	1081.73	359.918	845.538	1034.06	195.315	862.514	683.827	-122.847	646.294	792.469	-119.746	649.392	802.953	-41.3158	559.118	805.568	-68.0297	466.42	781.171	-56.0825	851.673	706.06	509.719	616.021	797.328	487.018	638.201	795.877	405.456	545.118	821.227	426.703	447.546	781.808	400.584
19	0.18	766.954	1230.11	193.49	804.074	1229.15	119.298	823.317	1226.71	260.268	926.003	1046.65	17.8325	923.66	1081.7	359.945	845.59	1034.01	195.317	862.48	683.786	-122.794	646.31	792.425	-119.745	649.416	802.91	-41.3193	559.105	805.537	-67.9942	466.426	781.149	-56.0721	851.639	705.989	509.719	616.05	797.299	487.03	638.225	795.839	405.474	545.14	821.195	426.705	447.559	781.765	400.603
20	0.19	766.979	1230.12	193.53	804.102	1229.14	119.326	823.368	1226.7	260.307	926.025	1046.63	17.8282	923.679	1081.67	359.937	845.675	1033.97	195.325	862.493	683.807	-122.83	646.332	792.382	-119.752	649.451	802.894	-41.3313	559.136	805.529	-68.0025	466.44	781.133	-56.0801	851.634	705.952	509.719	616.03	797.285	487.033	638.236	795.863	405.464	545.178	821.168	426.705	447.555	781.742	400.606
21	0.2	766.925	1230.15	193.579	804.078	1229.15	119.372	823.388	1226.74	260.342	926.035	1046.65	17.8302	923.686	1081.67	359.936	845.761	1033.98	195.377	862.503	683.854	-122.853	646.317	792.394	-119.733	649.456	802.886	-41.3177	559.159	805.508	-68.0001	466.467	781.144	-56.0765	851.633	705.94	509.724	616.045	797.3	487.034	638.221	795.92	405.457	545.191	821.166	426.721	447.555	781.746	400.617
22	0.21	766.826	1230.2	193.614	804.063	1229.17	119.402	823.395	1226.8	260.372	926.024	1046.67	17.832	923.68	1081.7	359.941	845.713	1034.02	195.381	862.518	683.889	-122.801	646.323	792.412	-119.716	649.433	802.91	-41.2929	559.175	805.49	-67.9989	466.434	781.146	-56.0701	851.609	705.921	509.711	616.039	797.3	487.025	638.171	795.963	405.454	545.151	821.207	426.727	447.548	781.784	400.617
23	0.22	766.775	1230.26	193.654	804.102	1229.18	119.429	823.335	1226.8	260.394	926.031	1046.7	17.8512	923.672	1081.71	359.954	845.687	1034.06	195.365	862.554	683.933	-122.771	646.293	792.461	-119.698	649.427	802.956	-41.2875	559.2	805.519	-67.9966	466.438	781.184	-56.0627	851.564	705.946	509.706	616.017	797.325	487.027	638.151	796.031	405.449	545.144	821.255	426.736	447.559	781.823	400.626
24	0.23	766.745	1230.31	193.694	804.082	1229.21	119.46	823.395	1226.82	260.416	926.024	1046.73	17.8506	923.646	1081.74	359.971	845.644	1034.11	195.367	862.522	683.97	-122.773	646.293	792.492	-119.708	649.419	802.985	-41.292	559.176	805.567	-67.9928	466.43	781.219	-56.0455	851.596	706	509.7	615.989	797.353	487.016	638.176	796.053	405.471	545.144	821.295	426.746	447.545	781.865	400.633
25	0.24	766.786	1230.31	193.713	804.044	1229.25	119.47	823.398	1226.83	260.43	926.04	1046.75	17.8552	923.654	1081.75	359.983	845.608	1034.13	195.399	862.506	683.964	-122.794	646.266	792.497	-119.692	649.405	803.006	-41.291	559.132	805.59	-67.9606	466.415	781.229	-56.0386	851.658	706.031	509.695	616.001	797.356	487.029	638.164	796.04	405.484	545.145	821.306	426.759	447.565	781.882	400.649
26	0.25	766.806	1230.28	193.692	804.065	1229.25	119.46	823.422	1226.79	260.418	926.031	1046.73	17.8507	923.674	1081.73	359.963	845.612	1034.11	195.398	862.526	683.95	-122.81	646.252	792.492	-119.691	649.425	802.99	-41.3071	559.124	805.567	-67.9706	466.436	781.207	-56.0596	851.671	706.02	509.683	616.015	797.336	487.03	638.169	795.98	405.488	545.162	821.275	426.738	447.572	781.862	400.641
27	0.26	766.836	1230.23	193.673	804.088	1229.2	119.446	823.407	1226.76	260.412	926.023	1046.68	17.8358	923.69	1081.71	359.952	845.678	1034.06	195.392	862.521	683.92	-122.815	646.308	792.47	-119.719	649.473	802.971	-41.3216	559.16	805.549	-68.0084	466.458	781.161	-56.0802	851.685	706.001	509.679	616.051	797.316	487.038	638.176	795.917	405.478	545.188	821.231	426.72	447.568	781.827	400.621
28	0.27	766.87	1230.18	193.655	804.072	1229.17	119.431	823.432	1226.74	260.399	926.011	1046.67	17.8317	923.675	1081.68	359.922	845.662	1034.02	195.396	862.472	683.859	-122.829	646.311	792.455	-119.739	649.471	802.942	-41.322	559.179	805.536	-68.0227	466.431	781.134	-56.0935	851.741	706.009	509.679	616.088	797.289	487.053	638.209	795.862	405.477	545.202	821.192	426.729	447.563	781.793	400.621
29	0.28	766.869	1230.17	193.648	804.045	1229.16	119.436	823.431	1226.73	260.384	925.992	1046.68	17.833	923.642	1081.68	359.917	845.679	1033.98	195.406	862.471	683.822	-122.836	646.303	792.432	-119.735	649.431	802.907	-41.317	559.16	805.541	-68.0121	466.437	781.114	-56.0846	851.733	706.007	509.684	616.088	797.3	487.054	638.231	795.835	405.489	545.189	821.181	426.743	447.551	781.79	400.629
30	0.29	766.906	1230.15	193.618	804.018	1229.17	119.416	823.403	1226.73	260.365	925.96	1046.68	17.8334	923.637	1081.7	359.929	845.683	1034	195.407	862.499	683.838	-122.83	646.295	792.442	-119.718	649.429	802.921	-41.3219	559.156	805.542	-67.9978	466.443	781.136	-56.0848	851.679	705.982	509.676	616.078	797.325	487.058	638.226	795.841	405.484	545.164	821.197	426.736	447.56	781.794	400.627
31	0.3	766.82	1230.18	193.609	804.021	1229.15	119.408	823.318	1226.76	260.374	925.942	1046.71	17.8517	923.648	1081.73	359.932	845.634	1034.02	195.432	862.508	683.886	-122.82	646.298	792.457	-119.693	649.441	802.954	-41.322	559.171	805.546	-67.9883	466.437	781.18	-56.0731	851.629	705.991	509.683	616.041	797.334	487.053	638.151	795.893	405.477	545.13	821.234	426.732	447.567	781.804	400.641
32	0.31	766.721	1230.23	193.641	803.966	1229.19	119.418	823.311	1226.81	260.411	925.927	1046.74	17.8497	923.621	1081.75	359.938	845.505	1034.09	195.431	862.49	683.923	-122.786	646.289	792.494	-119.681	649.398	803.002	-41.2952	559.132	805.58	-67.9439	466.406	781.193	-56.059	851.619	706.028	509.698	615.979	797.342	487.058	638.144	795.976	405.494	545.118	821.284	426.762	447.551	781.834	400.656
33	0.32	766.657	1230.29	193.676	803.89	1229.21	119.446	823.296	1226.84	260.416	925.916	1046.78	17.8476	923.6	1081.78	359.957	845.44	1034.14	195.46	862.459	683.974	-122.752	646.263	792.515	-119.636	649.388	803.027	-41.2527	559.081	805.611	-67.914	466.396	781.216	-56.0339	851.565	706.015	509.72	615.942	797.365	487.078	638.157	796.065	405.551	545.106	821.293	426.789	447.541	781.857	400.685
34	0.33	766.665	1230.28	193.667	803.883	1229.18	119.456	823.242	1226.84	260.391	925.908	1046.77	17.8574	923.59	1081.78	359.986	845.447	1034.12	195.483	862.504	684.005	-122.778	646.259	792.495	-119.605	649.397	803.017	-41.2318	559.103	805.589	-67.9025	466.393	781.221	-56.0093	851.547	705.987	509.722	615.928	797.372	487.073	638.148	796.09	405.566	545.104	821.29	426.797	447.555	781.856	400.704
35	0.34	766.688	1230.22	193.623	803.904	1229.13	119.417	823.216	1226.83	260.368	925.914	1046.77	17.8375	923.581	1081.76	359.985	845.508	1034.06	195.439	862.55	683.973	-122.835	646.28	792.452	-119.628	649.401	802.98	-41.245	559.126	805.531	-67.9145	466.424	781.188	-56.0237	851.56	705.981	509.736	615.958	797.338	487.072	638.155	796.055	405.527	545.157	821.273	426.801	447.579	781.825	400.707
36	0.35	766.754	1230.13	193.582	803.907	1229.11	119.353	823.219	1226.79	260.324	925.907	1046.73	17.8004	923.557	1081.73	359.933	845.57	1033.97	195.407	862.525	683.939	-122.87	646.311	792.436	-119.677	649.424	802.943	-41.2867	559.15	805.505	-67.9561	466.429	781.157	-56.0651	851.561	705.973	509.73	615.958	797.314	487.058	638.162	795.989	405.495	545.16	821.241	426.775	447.58	781.777	400.682
37	0.36	766.79	1230.07	193.542	803.9	1229.09	119.307	823.253	1226.72	260.288	925.905	1046.7	17.7862	923.52	1081.72	359.889	845.605	1033.93	195.383	862.501	683.883	-122.899	646.319	792.414	-119.714	649.437	802.925	-41.3081	559.197	805.484	-67.9824	466.429	781.119	-56.0861	851.572	705.965	509.712	615.976	797.316	487.044	638.19	795.907	405.483	545.137	821.212	426.748	447.556	781.75	400.64
38	0.37	766.819	1230.04	193.473	803.91	1229.04	119.27	823.242	1226.69	260.261	925.895	1046.67	17.7746	923.513	1081.71	359.873	845.593	1033.92	195.313	862.507	683.816	-122.903	646.313	792.4	-119.741	649.473	802.911	-41.3354	559.187	805.476	-67.9918	466.451	781.09	-56.1082	851.601	705.975	509.698	616.011	797.32	487.031	638.24	795.835	405.473	545.166	821.178	426.731	447.542	781.747	400.62
39	0.38	766.786	1230.03	193.442	803.899	1229.03	119.234	823.203	1226.67	260.225	925.912	1046.66	17.7621	923.507	1081.71	359.849	845.559	1033.94	195.263	862.525	683.789	-122.908	646.33	792.422	-119.774	649.447	802.947	-41.3522	559.138	805.516	-68.0244	466.452	781.118	-56.1441	851.68	706.033	509.705	616.063	797.323	487.019	638.293	795.801	405.472	545.206	821.171	426.703	447.575	781.771	400.6
40	0.39	766.696	1230.08	193.438	803.851	1229.04	119.214	823.168	1226.67	260.232	925.911	1046.68	17.7501	923.486	1081.71	359.833	845.463	1034	195.271	862.501	683.825	-122.902	646.325	792.453	-119.783	649.439	802.973	-41.3539	559.133	805.537	-68.0288	466.426	781.167	-56.1493	851.756	706.071	509.698	616.083	797.322	487.022	638.302	795.82	405.495	545.213	821.185	426.697	447.589	781.807	400.603
41	0.4	766.578	1230.12	193.43	803.794	1229.05	119.243	823.129	1226.71	260.255	925.892	1046.71	17.7767	923.474	1081.75	359.852	845.467	1034.06	195.315	862.472	683.864	-122.866	646.295	792.492	-119.752	649.434	803.018	-41.3236	559.125	805.559	-67.9993	466.41	781.189	-56.1263	851.758	706.074	509.708	616.057	797.339	487.031	638.271	795.908	405.522	545.193	821.238	426.734	447.562	781.848	400.646
42	0.41	766.474	1230.18	193.448	803.76	1229.06	119.292	823.121	1226.73	260.266	925.9	1046.75	17.8012	923.463	1081.78	359.894	845.463	1034.12	195.364	862.516	683.919	-122.8	646.306	792.523	-119.72	649.387	803.065	-41.2694	559.11	805.594	-67.9517	466.403	781.208	-56.0975	851.71	706.061	509.722	616.012	797.354	487.04	638.254	796.002	405.551	545.178	821.281	426.775	447.553	781.877	400.685
43	0.42	766.464	1230.17	193.485	803.745	1229.05	119.3	823.104	1226.74	260.273	925.893	1046.77	17.8095	923.441	1081.82	359.912	845.403	1034.15	195.392	862.495	683.972	-122.764	646.29	792.512	-119.674	649.367	803.076	-41.2368	559.131	805.607	-67.913	466.421	781.241	-56.0768	851.646	706.05	509.726	615.984	797.369	487.051	638.187	796.071	405.548	545.169	821.323	426.801	447.581	781.891	400.718
44	0.43	766.454	1230.13	193.515	803.676	1229.01	119.294	823.044	1226.72	260.249	925.86	1046.76	17.8091	923.399	1081.83	359.925	845.37	1034.13	195.393	862.483	683.967	-122.769	646.263	792.482	-119.659	649.34	803.051	-41.2418	559.113	805.596	-67.9039	466.385	781.244	-56.0656	851.567	706.023	509.722	615.95	797.368	487.046	638.106	796.076	405.514	545.098	821.315	426.794	447.593	781.87	400.732
45	0.44	766.494	1230.02	193.488	803.659	1228.95	119.268	822.983	1226.7	260.229	925.841	1046.72	17.8039	923.386	1081.81	359.909	845.398	1034.05	195.378	862.489	683.905	-122.807	646.265	792.447	-119.658	649.372	802.995	-41.2656	559.123	805.551	-67.9155	466.408	781.207	-56.0669	851.519	706.004	509.716	615.95	797.366	487.058	638.091	796.016	405.491	545.105	821.27	426.788	447.566	781.817	400.711
46	0.45	766.641	1229.9	193.422	803.706	1228.88	119.225	822.982	1226.64	260.185	925.835	1046.68	17.7919	923.385	1081.77	359.891	845.533	1033.93	195.372	862.519	683.815	-122.849	646.319	792.387	-119.691	649.434	802.944	-41.2997	559.175	805.488	-67.941	466.461	781.136	-56.0867	851.543	706.004	509.715	615.987	797.356	487.07	638.136	795.932	405.48	545.134	821.228	426.772	447.571	781.755	400.673
47	0.46	766.723	1229.81	193.365	803.715	1228.83	119.188	822.989	1226.62	260.159	925.819	1046.64	17.7595	923.4	1081.73	359.871	845.639	1033.83	195.317	862.511	683.746	-122.864	646.334	792.359	-119.74	649.443	802.912	-41.3378	559.165	805.463	-67.9903	466.484	781.089	-56.1324	851.578	706.021	509.721	615.985	797.333	487.068	638.128	795.855	405.446	545.125	821.183	426.723	447.571	781.718	400.635
48	0.47	766.651	1229.82	193.345	803.685	1228.8	119.173	823.02	1226.63	260.145	925.802	1046.62	17.7343	923.404	1081.71	359.841	845.664	1033.82	195.274	862.467	683.722	-122.869	646.332	792.363	-119.751	649.462	802.89	-41.3716	559.141	805.461	-67.9971	466.442	781.091	-56.1742	851.563	706.025	509.719	615.973	797.331	487.064	638.147	795.814	405.433	545.124	821.157	426.703	447.557	781.713	400.614
49	0.48	766.599	1229.88	193.351	803.639	1228.84	119.158	823.071	1226.63	260.16	925.787	1046.64	17.7379	923.411	1081.76	359.85	845.62	1033.88	195.309	862.472	683.775	-122.874	646.306	792.395	-119.746	649.458	802.919	-41.3516	559.11	805.5	-67.9757	466.416	781.126	-56.1606	851.57	706.009	509.711	615.993	797.344	487.057	638.268	795.823	405.496	545.135	821.18	426.727	447.566	781.754	400.634
50	0.49	766.47	1229.99	193.417	803.662	1228.87	119.181	823.08	1226.67	260.203	925.769	1046.69	17.7707	923.415	1081.79	359.881	845.502	1034.01	195.361	862.513	683.867	-122.846	646.271	792.458	-119.719	649.419	802.995	-41.3036	559.106	805.548	-67.9501	466.426	781.162	-56.1179	851.615	706.026	509.719	615.985	797.337	487.063	638.335	795.894	405.576	545.168	821.229	426.775	447.549	781.812	400.681
51	0.5	766.388	1230.09	193.45	803.616	1228.91	119.216	823.029	1226.71	260.23	925.773	1046.73	17.8032	923.395	1081.83	359.907	845.371	1034.13	195.402	862.505	683.943	-122.788	646.234	792.496	-119.673	649.39	803.047	-41.2851	559.086	805.609	-67.9153	466.397	781.223	-56.0904	851.645	706.056	509.724	615.975	797.336	487.059	638.286	795.977	405.611	545.164	821.292	426.799	447.534	781.867	400.706
52	0.51	766.4	1230.11	193.442	803.591	1228.94	119.231	823.009	1226.73	260.242	925.789	1046.75	17.8217	923.369	1081.84	359.921	845.282	1034.17	195.415	862.514	683.987	-122.78	646.237	792.505	-119.657	649.382	803.061	-41.281	559.076	805.635	-67.9145	466.387	781.243	-56.0784	851.643	706.076	509.72	616.028	797.347	487.077	638.275	796.025	405.625	545.158	821.3	426.805	447.55	781.89	400.718
53	0.52	766.413	1230.06	193.424	803.643	1228.95	119.23	823.026	1226.72	260.253	925.821	1046.76	17.8168	923.415	1081.84	359.894	845.338	1034.13	195.404	862.513	683.963	-122.801	646.28	792.513	-119.686	649.407	803.06	-41.2914	559.131	805.613	-67.9564	466.423	781.22	-56.084	851.665	706.104	509.734	616.048	797.363	487.085	638.256	796.023	405.6	545.178	821.301	426.804	447.578	781.894	400.711
54	0.53	766.492	1230.01	193.416	803.675	1228.92	119.204	823.05	1226.73	260.262	925.824	1046.75	17.7912	923.453	1081.81	359.878	845.425	1034.1	195.402	862.501	683.906	-122.85	646.318	792.494	-119.699	649.414	803.048	-41.2876	559.146	805.596	-67.9567	466.45	781.192	-56.1157	851.662	706.105	509.736	616.029	797.39	487.083	638.237	795.984	405.566	545.168	821.277	426.775	447.596	781.854	400.692
55	0.54	766.592	1229.94	193.405	803.702	1228.9	119.226	823.067	1226.71	260.255	925.806	1046.73	17.7997	923.451	1081.78	359.876	845.506	1034.05	195.416	862.468	683.851	-122.881	646.329	792.44	-119.71	649.394	803.029	-41.2793	559.177	805.562	-67.9569	466.426	781.19	-56.1308	851.637	706.077	509.718	616.013	797.394	487.083	638.223	795.957	405.55	545.143	821.246	426.765	447.591	781.821	400.675
56	0.55	766.593	1229.93	193.446	803.719	1228.88	119.272	823.054	1226.68	260.268	925.811	1046.75	17.8174	923.461	1081.76	359.901	845.565	1034	195.427	862.447	683.823	-122.868	646.302	792.413	-119.689	649.39	803.005	-41.2789	559.151	805.517	-67.9251	466.432	781.187	-56.1131	851.639	706.051	509.72	616.045	797.367	487.11	638.239	795.941	405.569	545.158	821.225	426.778	447.588	781.791	400.685
57	0.56	766.582	1229.94	193.521	803.738	1228.89	119.32	823.118	1226.68	260.309	925.826	1046.77	17.8469	923.464	1081.75	359.929	845.595	1034	195.453	862.439	683.874	-122.825	646.275	792.413	-119.641	649.407	802.976	-41.2557	559.143	805.505	-67.8941	466.411	781.167	-56.0802	851.656	706.025	509.742	616.049	797.341	487.13	638.295	795.927	405.613	545.195	821.215	426.819	447.591	781.783	400.728
58	0.57	766.607	1229.95	193.627	803.743	1228.91	119.401	823.163	1226.69	260.377	925.849	1046.8	17.8929	923.483	1081.74	359.961	845.571	1034.02	195.524	862.427	683.927	-122.8	646.267	792.422	-119.589	649.395	802.956	-41.2198	559.129	805.518	-67.8477	466.417	781.151	-56.033	851.633	705.981	509.765	616.038	797.323	487.153	638.326	795.924	405.656	545.185	821.206	426.865	447.592	781.77	400.78
59	0.58	766.613	1229.99	193.688	803.794	1228.95	119.462	823.207	1226.69	260.442	925.836	1046.84	17.895	923.515	1081.75	359.981	845.521	1034.07	195.575	862.442	684.033	-122.799	646.275	792.441	-119.57	649.381	802.979	-41.2023	559.12	805.543	-67.8352	466.436	781.165	-56.0333	851.58	705.943	509.749	616.025	797.297	487.15	638.397	795.918	405.704	545.204	821.208	426.873	447.589	781.776	400.783
60	0.59	766.607	1230.05	193.729	803.83	1228.99	119.539	823.2	1226.7	260.483	925.854	1046.92	17.9009	923.533	1081.77	359.995	845.509	1034.14	195.622	862.479	684.153	-122.801	646.258	792.47	-119.564	649.348	803.01	-41.1906	559.133	805.532	-67.8182	466.45	781.17	-56.0183	851.603	705.961	509.741	616.01	797.299	487.139	638.484	795.912	405.739	545.232	821.21	426.867	447.597	781.793	400.785
61	0.6	766.586	1230.13	193.792	803.842	1229.05	119.623	823.26	1226.73	260.528	925.894	1047.03	17.8968	923.553	1081.81	359.992	845.444	1034.24	195.626	862.485	684.264	-122.774	646.234	792.519	-119.57	649.323	803.062	-41.1825	559.116	805.562	-67.8184	466.438	781.176	-56.0192	851.63	706.014	509.707	615.982	797.316	487.15	638.5	795.922	405.781	545.213	821.226	426.876	447.571	781.832	400.787
62	0.61	766.633	1230.17	193.856	803.894	1229.1	119.705	823.26	1226.77	260.603	925.912	1047.17	17.8884	923.597	1081.83	359.963	845.468	1034.31	195.653	862.451	684.386	-122.751	646.198	792.551	-119.563	649.307	803.092	-41.1758	559.087	805.587	-67.8379	466.386	781.179	-56.0321	851.619	706.071	509.682	615.97	797.33	487.16	638.457	795.93	405.8	545.157	821.249	426.867	447.553	781.85	400.792
63	0.62	766.677	1230.22	193.929	804.017	1229.16	119.789	823.334	1226.82	260.684	925.924	1047.32	17.8724	923.663	1081.86	359.907	845.502	1034.37	195.655	862.413	684.513	-122.735	646.189	792.574	-119.587	649.28	803.149	-41.1922	559.059	805.6	-67.8709	466.371	781.187	-56.0893	851.598	706.147	509.649	615.964	797.353	487.135	638.4	795.966	405.76	545.099	821.282	426.838	447.565	781.86	400.77
64	0.63	766.768	1230.25	193.997	804.18	1229.22	119.888	823.41	1226.88	260.774	925.938	1047.44	17.8803	923.764	1081.91	359.905	845.552	1034.44	195.641	862.42	684.669	-122.669	646.232	792.598	-119.595	649.258	803.213	-41.2006	559.029	805.612	-67.8947	466.366	781.185	-56.132	851.622	706.244	509.67	615.971	797.383	487.108	638.271	796	405.677	545.058	821.304	426.814	447.587	781.854	400.753
65	0.64	766.873	1230.31	194.094	804.38	1229.3	120.032	823.595	1226.95	260.905	925.972	1047.58	17.9189	923.898	1081.96	359.916	845.605	1034.49	195.676	862.342	684.849	-122.557	646.234	792.626	-119.57	649.203	803.307	-41.1533	559.044	805.57	-67.8933	466.357	781.183	-56.1403	851.582	706.314	509.674	615.96	797.4	487.106	638.195	796.013	405.617	545.054	821.3	426.812	447.57	781.827	400.729
66	0.65	767.074	1230.36	194.203	804.582	1229.39	120.196	823.853	1227.03	261.041	926.066	1047.74	17.9979	924.042	1082.01	359.957	845.675	1034.57	195.743	862.272	685.088	-122.54	646.211	792.631	-119.517	649.161	803.437	-41.0919	559.026	805.559	-67.8251	466.374	781.157	-56.1825	851.518	706.352	509.682	615.938	797.389	487.114	638.202	796.017	405.604	545.077	821.278	426.828	447.574	781.802	400.719
67	0.66	767.242	1230.45	194.344	804.752	1229.53	120.348	824.042	1227.09	261.172	926.185	1047.88	18.1014	924.219	1082.09	359.991	845.727	1034.72	195.823	862.187	685.366	-122.521	646.187	792.666	-119.472	649.146	803.634	-41.0529	559.006	805.588	-67.7815	466.386	781.134	-56.2707	851.525	706.419	509.678	615.952	797.374	487.107	638.24	796.008	405.595	545.132	821.275	426.84	447.596	781.782	400.718
68	0.67	767.372	1230.63	194.527	804.932	1229.72	120.523	824.212	1227.22	261.385	926.336	1048.03	18.208	924.404	1082.18	360.051	845.762	1034.9	195.932	862.124	685.673	-122.505	646.153	792.736	-119.434	649.105	803.892	-41.0071	558.972	805.611	-67.7602	466.412	781.143	-56.3173	851.586	706.499	509.667	616.021	797.366	487.104	638.245	796.02	405.595	545.166	821.266	426.862	447.587	781.78	400.718
69	0.68	767.487	1230.9	194.755	805.094	1229.97	120.708	824.451	1227.4	261.581	926.495	1048.21	18.3301	924.557	1082.27	360.121	845.72	1035.11	196.044	862.049	686.044	-122.526	646.078	792.849	-119.41	649.08	804.218	-40.9714	558.905	805.665	-67.7347	466.413	781.193	-56.3509	851.568	706.566	509.628	616.066	797.365	487.102	638.318	796.04	405.629	545.174	821.27	426.87	447.557	781.822	400.723
70	0.69	767.634	1231.17	195.028	805.27	1230.24	120.906	824.717	1227.56	261.782	926.646	1048.38	18.4719	924.741	1082.4	360.189	845.685	1035.3	196.192	862.035	686.448	-122.553	645.942	792.982	-119.37	649.095	804.575	-40.944	558.832	805.729	-67.6778	466.406	781.242	-56.3905	851.576	706.682	509.6	616.075	797.36	487.1	638.314	796.059	405.674	545.159	821.274	426.888	447.548	781.851	400.736
71	0.7	767.911	1231.4	195.285	805.476	1230.52	121.133	824.973	1227.73	261.982	926.805	1048.56	18.6427	924.909	1082.52	360.239	845.653	1035.46	196.322	862.053	686.845	-122.607	645.828	793.128	-119.351	649.127	804.941	-40.9298	558.755	805.812	-67.6346	466.386	781.261	-56.4468	851.652	706.831	509.552	616.076	797.349	487.113	638.273	796.073	405.685	545.166	821.284	426.92	447.549	781.86	400.757
72	0.71	768.32	1231.63	195.514	805.714	1230.77	121.341	825.315	1227.93	262.221	927.012	1048.78	18.8395	925.045	1082.62	360.253	845.738	1035.55	196.428	862.109	687.226	-122.757	645.729	793.263	-119.327	649.177	805.312	-40.9519	558.675	805.913	-67.5901	466.432	781.262	-56.5563	851.652	706.972	509.517	616.049	797.353	487.111	638.233	796.072	405.635	545.174	821.274	426.929	447.563	781.832	400.757
73	0.72	768.758	1231.87	195.723	805.991	1231.01	121.507	825.632	1228.12	262.425	927.221	1049.01	19.0001	925.182	1082.72	360.227	845.845	1035.61	196.505	862.064	687.662	-122.895	645.646	793.451	-119.327	649.217	805.71	-41.0138	558.644	806.031	-67.5638	466.527	781.28	-56.7075	851.553	707.063	509.466	616.001	797.356	487.095	638.203	796.061	405.575	545.164	821.26	426.914	447.583	781.789	400.744
74	0.73	769.227	1232.13	195.968	806.243	1231.28	121.694	825.973	1228.28	262.596	927.409	1049.28	19.153	925.301	1082.81	360.234	845.954	1035.69	196.564	862.015	688.196	-123.029	645.496	793.713	-119.297	649.197	806.169	-41.04	558.586	806.215	-67.5311	466.706	781.314	-56.9233	851.476	707.133	509.414	616.004	797.361	487.095	638.165	796.055	405.549	545.144	821.251	426.902	447.584	781.765	400.725
75	0.74	769.619	1232.44	196.174	806.534	1231.57	121.881	826.241	1228.49	262.791	927.586	1049.54	19.3264	925.431	1082.93	360.247	845.946	1035.84	196.63	861.967	688.756	-123.137	645.276	794.098	-119.223	649.115	806.718	-40.9838	558.476	806.491	-67.4695	466.865	781.41	-57.1218	851.453	707.202	509.337	616.021	797.386	487.085	638.102	796.092	405.522	545.099	821.271	426.882	447.561	781.774	400.691
76	0.75	769.897	1232.8	196.358	806.816	1231.84	122.083	826.516	1228.74	262.974	927.767	1049.81	19.5087	925.52	1083.09	360.26	845.881	1036.03	196.697	861.857	689.304	-123.253	644.996	794.643	-119.065	649.008	807.359	-40.8493	558.405	806.815	-67.3689	467.027	781.574	-57.3041	851.477	707.29	509.305	615.999	797.406	487.067	638.062	796.136	405.512	545.05	821.317	426.877	447.535	781.815	400.694
77	0.76	770.076	1233.19	196.54	807.077	1232.13	122.278	826.826	1228.99	263.164	927.923	1050.06	19.668	925.593	1083.22	360.274	845.842	1036.23	196.779	861.716	689.801	-123.405	644.669	795.383	-118.814	648.926	808.138	-40.6192	558.384	807.219	-67.2104	467.221	781.781	-57.4799	851.434	707.372	509.255	615.963	797.441	487.045	638.041	796.174	405.532	545.027	821.346	426.877	447.52	781.853	400.709
78	0.77	770.23	1233.57	196.73	807.341	1232.42	122.474	827.138	1229.19	263.338	928.102	1050.26	19.8117	925.718	1083.32	360.299	845.892	1036.38	196.856	861.617	690.235	-123.545	644.528	796.203	-118.555	648.991	808.947	-40.3559	558.416	807.662	-66.9965	467.56	781.92	-57.6074	851.395	707.433	509.243	615.952	797.448	487.038	638.054	796.196	405.541	545.035	821.361	426.878	447.538	781.868	400.711
79	0.78	770.482	1233.84	196.883	807.627	1232.68	122.638	827.462	1229.37	263.485	928.309	1050.45	19.9453	925.829	1083.41	360.3	845.98	1036.5	196.911	861.501	690.625	-123.678	644.499	797.113	-118.326	649.159	809.659	-40.0837	558.481	808.156	-66.7133	467.913	781.997	-57.5485	851.392	707.482	509.233	615.997	797.427	487.035	638.066	796.184	405.508	545.08	821.363	426.874	447.564	781.863	400.714
80	0.79	770.722	1234.1	197.02	807.895	1232.89	122.795	827.719	1229.48	263.618	928.483	1050.6	20.0629	925.941	1083.51	360.297	846.088	1036.55	196.985	861.31	690.94	-123.762	644.45	798.16	-118.055	649.253	810.341	-39.7872	558.551	808.707	-66.4352	468.256	782.212	-57.404	851.412	707.534	509.243	616.03	797.407	487.039	638.062	796.178	405.498	545.086	821.336	426.881	447.593	781.835	400.742
81	0.8	770.902	1234.37	197.109	808.107	1233.07	122.924	828.028	1229.61	263.74	928.593	1050.73	20.1446	926.025	1083.59	360.303	846.164	1036.59	197.03	861.074	691.244	-123.81	644.383	799.331	-117.823	649.281	811.123	-39.5061	558.639	809.357	-66.1966	468.67	782.743	-57.3261	851.417	707.589	509.259	616.049	797.398	487.035	638.073	796.168	405.495	545.099	821.288	426.892	447.594	781.812	400.747
82	0.81	771.173	1234.57	197.214	808.294	1233.24	123.036	828.286	1229.73	263.857	928.663	1050.84	20.2003	926.1	1083.64	360.286	846.219	1036.61	197.073	860.824	691.531	-123.847	644.423	800.447	-117.577	649.356	812.151	-39.2111	558.727	810.256	-66.0187	469.073	783.756	-57.3404	851.439	707.677	509.281	616.038	797.385	487.038	638.067	796.145	405.469	545.112	821.262	426.905	447.56	781.783	400.715
83	0.82	771.404	1234.77	197.324	808.493	1233.41	123.1	828.54	1229.83	263.926	928.688	1050.93	20.208	926.174	1083.71	360.224	846.196	1036.67	197.066	860.563	691.826	-123.894	644.585	801.555	-117.129	649.648	813.691	-38.7168	558.857	811.718	-65.8117	469.493	785.2	-57.523	851.435	707.77	509.285	616.046	797.369	487.011	638.024	796.136	405.422	545.069	821.23	426.866	447.554	781.776	400.688
84	0.83	770.667	1235.41	197.647	808.676	1233.58	123.138	828.671	1229.9	263.922	928.695	1051.02	20.2104	926.235	1083.83	360.17	846.173	1036.73	197.047	860.055	691.957	-123.959	644.717	802.989	-116.384	650.1	815.718	-38.0391	559.191	813.88	-65.2526	469.988	787.213	-57.6128	851.397	707.869	509.272	616.014	797.372	486.991	637.988	796.162	405.394	545.029	821.243	426.832	447.551	781.769	400.661
85	0.84	768.687	1236.61	198.253	808.795	1233.74	123.156	828.616	1229.95	263.924	928.687	1051.13	20.2189	926.269	1083.94	360.119	846.1	1036.83	197.014	859.215	691.923	-124.039	644.853	804.605	-115.481	650.666	818.218	-37.3998	559.721	816.51	-64.3609	470.353	790.125	-57.1256	851.341	707.979	509.265	616.002	797.384	486.971	637.963	796.184	405.38	545.024	821.259	426.805	447.511	781.795	400.615
86	0.85	768.256	1237.1	198.423	808.903	1233.9	123.159	828.754	1230.03	263.913	928.698	1051.27	20.2357	926.302	1084.05	360.055	846.043	1036.9	196.971	858.546	692.316	-123.954	645.231	806.094	-114.582	651.625	821.2	-36.9567	560.414	819.46	-63.4591	470.855	793.9	-56.0155	851.316	708.081	509.271	615.999	797.407	486.937	637.938	796.196	405.363	544.997	821.278	426.771	447.475	781.82	400.59
87	0.86	769.174	1236.92	198.175	809.07	1234.01	123.13	828.996	1230.17	263.863	928.79	1051.42	20.2454	926.39	1084.15	359.983	846.068	1036.94	196.957	857.999	692.811	-123.844	645.511	807.69	-113.789	652.594	824.696	-36.627	561.023	822.719	-62.5455	471.498	798.28	-54.3689	851.356	708.172	509.271	615.997	797.45	486.895	637.958	796.187	405.324	544.993	821.29	426.715	447.495	781.828	400.596
88	0.87	771.423	1236.11	197.497	809.239	1234.1	123.068	829.375	1230.4	263.81	928.914	1051.59	20.2678	926.441	1084.23	359.911	846.072	1036.98	196.913	857.432	693.255	-123.598	645.696	809.391	-112.989	653.598	828.335	-36.3437	561.762	826.325	-61.4126	472.09	803.002	-52.2435	851.355	708.263	509.308	615.98	797.476	486.859	637.99	796.185	405.304	545.022	821.299	426.706	447.544	781.83	400.615
89	0.88	772.068	1236.01	197.214	809.382	1234.18	122.959	829.604	1230.53	263.711	929.048	1051.77	20.2915	926.45	1084.31	359.85	846.019	1037.03	196.865	856.771	693.705	-123.337	646.055	811.138	-112	654.766	831.979	-36.017	562.737	830.319	-60.086	472.781	807.961	-49.601	851.342	708.325	509.331	615.972	797.482	486.861	638.005	796.184	405.321	545.048	821.297	426.724	447.513	781.822	400.622
90	0.89	772.311	1236.04	197.039	809.497	1234.24	122.825	829.711	1230.59	263.558	929.198	1051.96	20.3353	926.421	1084.39	359.804	846.063	1037.07	196.832	855.973	694.371	-123.13	646.027	812.823	-110.745	655.843	835.922	-35.6659	563.547	834.553	-58.7313	473.408	813.283	-46.5585	851.361	708.394	509.333	615.969	797.468	486.886	637.992	796.203	405.352	545.039	821.285	426.752	447.496	781.817	400.645
91	0.9	772.455	1236.09	196.867	809.653	1234.25	122.663	829.771	1230.64	263.406	929.392	1052.16	20.3641	926.438	1084.46	359.755	846.156	1037.09	196.792	854.948	695.043	-122.949	645.767	814.292	-109.277	656.839	840.105	-35.3144	564.34	838.962	-57.2059	474.167	818.988	-43.3133	851.398	708.456	509.325	615.976	797.43	486.912	638.024	796.199	405.381	545.047	821.286	426.789	447.503	781.813	400.669
92	0.91	772.678	1236.08	196.668	809.885	1234.26	122.452	829.861	1230.73	263.259	929.653	1052.36	20.3935	926.467	1084.52	359.687	846.263	1037.11	196.72	853.947	695.656	-122.703	645.819	816.479	-107.89	657.97	844.293	-34.9117	565.221	843.446	-55.5895	475.103	824.951	-39.898	851.417	708.512	509.329	615.983	797.405	486.939	638.042	796.187	405.395	545.052	821.271	426.82	447.522	781.779	400.67
93	0.92	772.956	1236.03	196.467	810.15	1234.23	122.223	829.95	1230.77	263.08	929.899	1052.56	20.4422	926.512	1084.6	359.626	846.319	1037.14	196.672	852.794	696.299	-122.45	645.938	819.067	-106.402	659.229	848.426	-34.3716	566.161	848.069	-53.7203	476.069	831.026	-36.4084	851.394	708.551	509.317	615.968	797.4	486.95	638.01	796.153	405.392	544.984	821.245	426.824	447.498	781.736	400.653
94	0.93	773.104	1236.05	196.283	810.347	1234.21	122.027	830.026	1230.87	262.918	930.135	1052.78	20.4997	926.556	1084.67	359.606	846.382	1037.18	196.659	851.312	697.153	-122.235	646.055	821.965	-104.816	660.659	852.549	-33.6255	567.118	852.818	-51.7749	477.041	837.219	-32.8322	851.396	708.602	509.305	615.922	797.41	486.936	637.987	796.131	405.389	544.958	821.221	426.791	447.497	781.712	400.66
95	0.94	773.215	1236.08	196.074	810.542	1234.22	121.839	830.163	1230.98	262.751	930.458	1053.02	20.5798	926.61	1084.74	359.594	846.434	1037.24	196.647	849.651	698.049	-122.08	646.35	825.046	-103.133	661.975	856.719	-32.8181	568.086	857.718	-49.6356	478.168	843.503	-29.1628	851.483	708.689	509.307	615.913	797.44	486.915	638.006	796.138	405.387	544.982	821.233	426.775	447.5	781.709	400.685
96	0.95	773.397	1236.12	195.854	810.825	1234.24	121.651	830.263	1231.1	262.575	930.815	1053.25	20.6782	926.654	1084.82	359.579	846.497	1037.32	196.638	847.802	698.944	-122.007	646.599	828.383	-101.364	663.27	860.981	-31.8767	569.162	862.703	-47.4676	479.398	849.88	-25.4426	851.525	708.78	509.266	615.888	797.494	486.904	638.003	796.139	405.389	544.984	821.252	426.78	447.472	781.726	400.706
97	0.96	773.568	1236.23	195.609	811.064	1234.26	121.457	830.229	1231.22	262.4	931.179	1053.5	20.7678	926.703	1084.91	359.566	846.499	1037.44	196.632	845.766	699.969	-121.953	646.741	831.881	-99.6089	664.619	865.195	-30.8715	570.296	867.699	-45.2072	480.842	856.33	-21.7667	851.514	708.89	509.2	615.876	797.552	486.907	637.944	796.147	405.374	544.958	821.273	426.78	447.451	781.754	400.735
98	0.97	773.73	1236.32	195.343	811.33	1234.3	121.258	830.302	1231.36	262.23	931.533	1053.76	20.8277	926.797	1084.99	359.538	846.456	1037.58	196.605	843.896	700.943	-121.888	646.979	835.331	-97.8237	666.079	869.249	-29.8732	571.511	872.814	-42.8003	482.221	862.836	-18.1197	851.498	708.981	509.128	615.879	797.56	486.906	637.937	796.166	405.39	544.919	821.308	426.795	447.433	781.782	400.75
99	0.98	773.995	1236.4	195.075	811.615	1234.37	121.073	830.433	1231.49	262.074	931.901	1054	20.9017	926.877	1085.08	359.509	846.595	1037.7	196.556	841.861	702.084	-121.902	647.372	838.851	-95.9922	667.456	873.316	-28.8381	572.723	878.061	-40.4906	483.667	869.477	-14.5163	851.515	709.061	509.056	615.912	797.561	486.901	637.92	796.173	405.392	544.926	821.312	426.819	447.448	781.778	400.759
100	0.99	774.28	1236.47	194.789	811.932	1234.44	120.877	830.54	1231.61	261.933	932.271	1054.24	21.0027	926.997	1085.14	359.489	846.704	1037.81	196.5	839.72	703.221	-122.008	646.964	842.374	-94.3778	668.904	877.42	-27.7568	573.846	883.316	-38.3129	485.304	876.263	-10.9665	851.533	709.099	508.98	615.914	797.56	486.899	637.958	796.168	405.416	544.95	821.298	426.829	447.456	781.778	400.761
101	1	774.518	1236.5	194.483	812.247	1234.52	120.676	830.657	1231.72	261.803	932.599	1054.48	21.1011	927.111	1085.18	359.474	846.824	1037.91	196.459	837.464	704.413	-122.13	645.484	845.79	-93.0842	670.307	881.594	-26.6998	574.939	888.621	-36.1225	486.965	883.101	-7.30591	851.562	709.125	508.909	615.932	797.547	486.895	637.985	796.174	405.43	544.94	821.291	426.828	447.449	781.767	400.76
102	1.01	774.678	1236.57	194.193	812.581	1234.63	120.487	830.79	1231.84	261.707	932.906	1054.7	21.202	927.206	1085.22	359.454	846.943	1038	196.496	835.249	705.646	-122.181	645.135	849.339	-91.3218	671.686	885.764	-25.7839	576.353	894.059	-33.8041	488.721	889.954	-3.57208	851.549	709.112	508.806	615.982	797.559	486.894	638.03	796.169	405.423	544.971	821.296	426.825	447.428	781.747	400.766
103	1.02	774.914	1236.64	193.929	812.965	1234.74	120.34	830.965	1231.94	261.587	933.186	1054.93	21.3057	927.345	1085.27	359.486	847.152	1038.08	196.529	832.914	706.975	-122.225	645.329	852.717	-89.2241	673.326	889.871	-24.732	577.844	899.416	-31.5628	491.052	896.749	0.07734	851.597	709.132	508.7	615.989	797.567	486.881	638.07	796.161	405.431	545.022	821.279	426.844	447.465	781.732	400.804
104	1.03	775.175	1236.74	193.664	813.431	1234.82	120.185	831.198	1232.04	261.457	933.417	1055.13	21.3915	927.483	1085.33	359.516	847.357	1038.19	196.515	830.476	708.287	-122.375	645.688	856.084	-87.0187	674.944	894.029	-23.7783	579.393	904.756	-29.2579	493.451	903.738	3.85807	851.627	709.135	508.62	615.98	797.572	486.878	638.105	796.114	405.409	545.024	821.271	426.841	447.478	781.705	400.84
105	1.04	775.443	1236.85	193.375	813.856	1234.9	120.008	831.402	1232.16	261.335	933.664	1055.32	21.4551	927.621	1085.36	359.492	847.578	1038.27	196.501	827.56	709.46	-122.674	645.778	859.741	-84.967	676.389	898.24	-22.8948	580.967	910.141	-26.8737	495.406	910.891	7.37715	851.643	709.119	508.526	615.971	797.582	486.859	638.127	796.08	405.367	545.017	821.253	426.84	447.485	781.668	400.836
106	1.05	775.72	1236.96	193.114	814.274	1235	119.798	831.57	1232.3	261.208	933.95	1055.59	21.5338	927.713	1085.38	359.443	847.728	1038.38	196.472	824.34	710.507	-123.029	645.754	863.528	-83.0115	677.946	902.465	-21.8937	582.493	915.672	-24.7864	496.89	918.171	10.3127	851.69	709.145	508.418	615.961	797.599	486.84	638.06	796.07	405.336	545	821.253	426.839	447.477	781.665	400.832
107	1.06	776.024	1237.07	192.872	814.705	1235.11	119.63	831.747	1232.42	261.061	934.287	1055.89	21.6554	927.826	1085.41	359.397	847.828	1038.56	196.43	821.702	712.063	-123.165	645.774	867.325	-80.893	679.561	906.654	-21.2532	584.33	921.346	-22.9834	498.509	924.958	13.7081	851.744	709.173	508.33	615.987	797.619	486.841	638.008	796.081	405.329	544.975	821.263	426.846	447.443	781.679	400.834
108	1.07	776.254	1237.23	192.606	815.177	1235.23	119.446	831.893	1232.54	260.902	934.599	1056.18	21.7662	927.95	1085.45	359.358	847.947	1038.72	196.354	819.332	713.795	-123.335	645.843	871.112	-78.7498	681.393	910.751	-20.9409	586.26	926.679	-20.9627	500.159	931.663	17.2947	851.795	709.206	508.231	615.962	797.649	486.837	638.001	796.08	405.325	544.956	821.258	426.843	447.415	781.688	400.811
109	1.08	776.472	1237.4	192.379	815.578	1235.35	119.312	832.074	1232.63	260.735	934.863	1056.46	21.8665	928.056	1085.51	359.321	848.08	1038.86	196.299	816.963	715.537	-123.388	645.816	874.985	-76.7412	683.24	915.006	-20.0948	587.785	932.037	-18.2567	502.867	938.289	21.3014	851.835	709.263	508.122	615.948	797.665	486.815	637.936	796.083	405.298	544.941	821.278	426.832	447.414	781.699	400.791
110	1.09	776.676	1237.58	192.197	815.966	1235.47	119.147	832.222	1232.73	260.563	935.141	1056.76	21.9514	928.171	1085.57	359.29	848.164	1039.07	196.278	814.398	717.406	-123.546	645.579	878.938	-74.7779	684.978	919.443	-19.1358	589.682	937.29	-15.705	507.069	945.052	26.0816	851.913	709.327	508.003	615.97	797.683	486.796	637.918	796.116	405.285	544.94	821.314	426.827	447.388	781.737	400.788
111	1.1	776.966	1237.77	192.046	816.393	1235.59	118.982	832.354	1232.83	260.392	935.457	1057.09	22.0621	928.327	1085.64	359.286	848.319	1039.23	196.251	811.768	719.216	-123.761	645.575	882.781	-72.556	686.86	923.856	-18.134	591.67	942.677	-13.2506	510.277	951.953	30.2213	852.02	709.396	507.924	616.008	797.704	486.768	637.878	796.138	405.277	544.937	821.359	426.809	447.381	781.763	400.775
112	1.11	777.265	1237.93	191.865	816.818	1235.68	118.786	832.498	1232.94	260.217	935.816	1057.41	22.1861	928.498	1085.68	359.249	848.498	1039.34	196.172	808.998	721.047	-123.899	645.587	886.677	-70.2121	688.799	928.054	-17.1364	593.762	948.111	-10.7218	513.096	959.011	34.2465	852.046	709.44	507.847	616.005	797.71	486.732	637.884	796.141	405.252	544.934	821.343	426.789	447.39	781.765	400.767
113	1.12	777.591	1238.08	191.628	817.164	1235.74	118.599	832.734	1233.04	260.033	936.185	1057.73	22.3118	928.668	1085.71	359.203	848.775	1039.37	196.092	806.112	722.998	-124.04	645.725	890.598	-67.7852	690.399	931.692	-15.2544	596.002	953.589	-8.23624	516.185	966.005	38.1636	852.072	709.484	507.777	616.031	797.719	486.715	637.941	796.107	405.216	544.958	821.31	426.775	447.409	781.746	400.779
114	1.13	777.871	1238.22	191.343	817.54	1235.81	118.406	832.936	1233.12	259.819	936.513	1058.03	22.4156	928.823	1085.73	359.153	849.033	1039.46	196.015	803.193	724.986	-124.224	645.698	894.509	-65.3764	691.548	935.064	-13.1811	598.304	959.183	-5.94181	519.546	972.953	42.0574	852.111	709.536	507.662	616.08	797.716	486.711	637.925	796.089	405.18	544.959	821.29	426.748	447.421	781.706	400.766
115	1.14	778.112	1238.39	191.035	817.961	1235.86	118.196	833.073	1233.21	259.604	936.816	1058.31	22.5204	928.968	1085.76	359.133	849.249	1039.53	195.919	800.268	727.001	-124.349	645.89	898.399	-62.7315	693.192	939.582	-13.6858	600.709	964.978	-3.79861	523.007	980.145	45.8216	852.129	709.579	507.584	616.075	797.696	486.708	637.901	796.087	405.174	544.969	821.266	426.757	447.425	781.675	400.762
116	1.15	778.317	1238.52	190.663	818.356	1235.92	117.946	833.067	1233.33	259.383	937.124	1058.57	22.6328	929.094	1085.8	359.088	849.447	1039.59	195.82	797.165	729.055	-124.497	646.151	902.295	-60.2145	694.995	943.588	-13.0123	602.92	970.509	-1.5196	526.212	987.577	49.402	852.154	709.64	507.514	616.053	797.674	486.678	637.885	796.079	405.139	544.979	821.242	426.752	447.412	781.667	400.729
117	1.16	778.535	1238.63	190.269	818.749	1236	117.702	833.093	1233.45	259.156	937.45	1058.87	22.7559	929.225	1085.83	359.038	849.659	1039.64	195.747	793.906	731.184	-124.63	646.484	906.216	-57.7249	696.681	947.547	-12.2	604.996	975.603	0.85882	529.619	994.25	53.5993	852.135	709.679	507.459	616.059	797.69	486.661	637.832	796.093	405.094	544.981	821.242	426.752	447.423	781.65	400.717
118	1.17	778.751	1238.74	189.864	819.142	1236.08	117.477	833.165	1233.57	258.918	937.785	1059.19	22.8784	929.334	1085.9	359.009	849.846	1039.73	195.709	790.839	733.451	-124.706	646.709	910.124	-55.0922	698.348	951.706	-11.0846	607.144	980.504	3.96005	533.672	1000.37	58.207	852.164	709.749	507.382	616.047	797.716	486.648	637.807	796.131	405.086	544.962	821.259	426.734	447.417	781.657	400.718
119	1.18	778.91	1238.89	189.44	819.535	1236.14	117.236	833.267	1233.74	258.697	938.137	1059.51	23.0197	929.443	1085.95	359.012	849.979	1039.81	195.688	787.77	735.747	-124.78	646.872	913.979	-52.3427	700.33	955.912	-9.58642	609.215	985.483	7.57166	537.79	1006.77	62.4809	852.186	709.815	507.339	615.996	797.734	486.629	637.8	796.141	405.097	544.945	821.279	426.728	447.41	781.677	400.745
120	1.19	779.095	1239.02	188.99	819.936	1236.19	116.931	833.351	1233.92	258.439	938.509	1059.84	23.1349	929.533	1086.01	358.99	850.019	1039.93	195.622	784.579	738.019	-124.918	647.023	917.858	-49.5765	701.792	960.113	-8.95432	611.521	990.515	10.5037	541.872	1013.1	66.6755	852.183	709.921	507.287	615.992	797.741	486.605	637.816	796.16	405.11	544.922	821.308	426.713	447.383	781.697	400.736
121	1.2	779.367	1239.13	188.593	820.316	1236.26	116.566	833.382	1234.09	258.159	938.871	1060.16	23.2572	929.615	1086.05	358.976	850.153	1040.03	195.57	781.39	740.386	-125.022	647.198	921.687	-46.7996	702.937	964.551	-8.60605	613.919	995.512	13.2766	545.955	1019.34	70.8788	852.223	710.01	507.243	616.017	797.748	486.601	637.814	796.142	405.109	544.908	821.315	426.707	447.361	781.712	400.737
122	1.21	779.588	1239.26	188.229	820.623	1236.32	116.212	833.365	1234.25	257.825	939.263	1060.47	23.3731	929.668	1086.09	358.944	850.205	1040.12	195.467	778.137	742.974	-125.12	647.427	925.43	-43.8458	704.929	968.39	-7.67786	616.358	1000.42	15.9903	550.406	1025.55	75.2632	852.315	710.102	507.174	616.045	797.78	486.584	637.804	796.117	405.104	544.909	821.338	426.707	447.366	781.716	400.741
123	1.22	779.821	1239.35	187.901	820.968	1236.35	115.856	833.48	1234.39	257.523	939.674	1060.75	23.4932	929.739	1086.1	358.92	850.293	1040.15	195.383	774.787	745.508	-125.204	647.787	929.049	-40.7993	707.304	971.956	-6.62085	619.019	1005.26	18.7677	555.17	1031.67	79.6139	852.327	710.154	507.135	616.027	797.783	486.584	637.832	796.066	405.104	544.939	821.327	426.723	447.371	781.711	400.73
124	1.23	780.102	1239.38	187.542	821.363	1236.37	115.469	833.544	1234.48	257.187	940.075	1061.02	23.5958	929.771	1086.1	358.883	850.355	1040.2	195.273	771.494	747.972	-125.243	648.209	932.704	-37.7702	708.683	975.258	-6.11884	621.816	1009.98	21.5089	560	1037.59	83.8022	852.335	710.188	507.08	616.064	797.791	486.585	637.88	796.021	405.089	544.938	821.306	426.709	447.373	781.691	400.731
125	1.24	780.377	1239.43	187.146	821.719	1236.37	115.07	833.534	1234.56	256.8	940.451	1061.28	23.6965	929.788	1086.12	358.835	850.52	1040.17	195.165	768.297	750.574	-125.239	648.617	936.421	-34.6594	710.213	978.73	-5.53307	624.771	1014.58	24.3759	565.113	1043.42	88.0928	852.386	710.223	507.078	616.093	797.805	486.584	637.871	795.984	405.067	544.934	821.278	426.711	447.378	781.684	400.738
126	1.25	780.579	1239.54	186.65	822.059	1236.37	114.694	833.543	1234.69	256.443	940.832	1061.53	23.7994	929.807	1086.14	358.803	850.666	1040.15	195.065	765.029	753.218	-125.134	649.009	940.114	-31.5042	711.908	982.208	-4.84269	627.893	1019.15	27.2847	570.477	1049.18	92.5328	852.397	710.228	507.075	616.08	797.791	486.571	637.887	795.957	405.063	544.955	821.276	426.705	447.381	781.673	400.736
127	1.26	780.783	1239.67	186.095	822.461	1236.39	114.327	833.518	1234.82	256.094	941.192	1061.74	23.9151	929.788	1086.15	358.772	850.785	1040.17	194.965	761.727	755.792	-124.942	649.515	943.78	-28.2567	713.46	985.814	-4.18173	630.783	1023.78	30.2723	576.143	1054.99	96.9877	852.365	710.22	507.072	616.083	797.804	486.583	637.89	795.979	405.044	544.987	821.278	426.728	447.419	781.664	400.759
128	1.27	780.902	1239.84	185.51	822.798	1236.47	113.962	833.505	1234.98	255.758	941.533	1061.97	24.0268	929.79	1086.19	358.719	850.848	1040.2	194.875	758.338	758.546	-124.715	650.172	947.309	-24.8803	714.903	989.478	-3.64556	633.282	1028.51	33.3942	581.977	1060.79	101.361	852.349	710.266	507.057	616.083	797.82	486.579	637.885	796.007	405.052	545.024	821.285	426.748	447.428	781.648	400.774
129	1.28	781.026	1240.04	184.974	823.097	1236.57	113.631	833.538	1235.16	255.455	941.897	1062.2	24.1454	929.752	1086.23	358.679	850.869	1040.24	194.789	754.938	761.296	-124.349	650.712	950.82	-21.3523	716.402	992.944	-3.34064	636.284	1033.02	36.3162	588.147	1066.57	105.681	852.375	710.34	507.071	616.101	797.838	486.591	637.884	796.022	405.081	545.019	821.293	426.767	447.451	781.651	400.833
130	1.29	781.056	1240.29	184.478	823.364	1236.68	113.305	833.617	1235.35	255.155	942.221	1062.42	24.2448	929.679	1086.28	358.615	850.831	1040.3	194.683	751.55	763.968	-123.879	651.162	954.348	-17.7303	717.953	996.355	-3.06604	639.389	1037.46	39.187	594.725	1072.17	109.903	852.399	710.423	507.063	616.107	797.884	486.621	637.889	796.04	405.124	545.007	821.328	426.786	447.436	781.687	400.885
131	1.3	781.063	1240.57	184.086	823.597	1236.79	112.995	833.647	1235.52	254.865	942.535	1062.64	24.3525	929.618	1086.32	358.548	850.836	1040.33	194.578	748.138	766.729	-123.365	651.76	957.779	-13.9955	719.186	999.876	-2.68654	642.634	1041.68	42.0352	601.29	1077.81	114.028	852.421	710.527	507.054	616.065	797.913	486.662	637.911	796.062	405.177	544.968	821.359	426.815	447.414	781.701	400.936
132	1.31	781.027	1240.85	183.718	823.765	1236.9	112.678	833.624	1235.66	254.55	942.828	1062.82	24.4453	929.505	1086.37	358.46	850.755	1040.34	194.433	744.533	769.55	-122.768	652.324	961.252	-10.2209	720.491	1003.27	-2.18557	646.002	1045.76	44.9718	607.874	1083.4	117.958	852.412	710.609	507.036	616.028	797.921	486.668	637.935	796.053	405.215	544.898	821.367	426.807	447.377	781.711	400.957
133	1.32	781.178	1241.09	183.395	823.905	1236.99	112.374	833.629	1235.81	254.257	943.107	1062.99	24.556	929.381	1086.4	358.375	850.711	1040.33	194.315	740.948	772.307	-121.982	652.95	964.748	-6.43685	721.866	1006.44	-1.66298	649.584	1049.78	47.9266	614.524	1088.84	121.816	852.412	710.677	507.053	616.053	797.921	486.676	637.971	796.019	405.231	544.929	821.356	426.816	447.362	781.703	400.95
134	1.33	781.315	1241.39	183.056	824.056	1237.09	112.048	833.636	1235.96	253.944	943.412	1063.17	24.6683	929.289	1086.43	358.293	850.786	1040.31	194.201	737.508	775.099	-121.051	653.7	968.176	-2.76786	723.074	1009.56	-1.18078	653.346	1053.72	50.8688	621.312	1093.87	125.756	852.414	710.731	507.041	616.047	797.917	486.661	638.018	795.969	405.235	544.962	821.319	426.816	447.372	781.692	400.947
135	1.34	781.413	1241.65	182.701	824.22	1237.18	111.72	833.624	1236.08	253.608	943.697	1063.35	24.8221	929.225	1086.45	358.213	850.784	1040.29	194.086	734.201	777.866	-120.121	655.443	971.223	1.08157	724.34	1012.57	-0.61744	657.159	1057.54	53.7719	628.757	1098.25	129.584	852.393	710.79	507.055	616.038	797.91	486.663	638.003	795.921	405.23	544.945	821.272	426.809	447.358	781.672	400.959
136	1.35	781.53	1241.91	182.32	824.402	1237.28	111.34	833.597	1236.21	253.29	943.938	1063.53	24.93	929.135	1086.48	358.103	850.779	1040.25	193.923	730.821	780.542	-119.104	658.673	973.779	5.22975	725.322	1015.48	-0.15148	661.14	1061.14	56.5869	636.19	1102.91	132.919	852.375	710.865	507.055	616.027	797.897	486.641	638.002	795.874	405.199	544.929	821.235	426.781	447.352	781.645	400.933
137	1.36	781.761	1242.11	181.934	824.585	1237.38	110.973	833.58	1236.36	252.951	944.157	1063.73	25.0048	929.034	1086.51	357.99	850.779	1040.22	193.778	727.448	783.272	-117.968	660.665	976.679	8.98626	726.394	1018.33	0.42132	665.159	1064.65	59.3553	643.627	1107.4	135.902	852.387	710.929	507.047	616.036	797.894	486.626	637.974	795.852	405.143	544.916	821.238	426.753	447.343	781.621	400.911
138	1.37	781.948	1242.38	181.589	824.764	1237.51	110.639	833.546	1236.58	252.631	944.345	1063.94	25.0928	928.969	1086.56	357.864	848.781	1040.89	194.187	724.054	785.971	-116.747	662.452	979.687	12.6415	728.311	1020.88	1.61913	668.743	1068.03	62.3525	650.831	1111.85	138.591	852.391	710.994	507.04	616.039	797.902	486.59	637.918	795.877	405.116	544.888	821.265	426.723	447.325	781.617	400.892
139	1.38	782.025	1242.7	181.311	824.861	1237.67	110.391	833.493	1236.83	252.345	944.497	1064.16	25.227	928.859	1086.64	357.782	846.746	1041.96	194.688	720.758	788.637	-115.472	664.216	982.776	16.3	729.81	1023.44	2.43364	672.088	1071.31	65.3322	657.963	1116.13	141.191	852.386	711.052	507.047	616.017	797.929	486.576	637.904	795.948	405.121	544.908	821.295	426.752	447.316	781.637	400.913
140	1.39	782.188	1243.02	181.017	824.931	1237.86	110.142	833.462	1237.08	252.099	944.636	1064.37	25.3265	928.768	1086.72	357.707	848.551	1041.86	194.166	717.584	791.323	-114.108	665.932	985.784	19.8643	730.734	1026.06	2.98459	676.943	1074.41	67.3544	665.062	1120.14	143.56	852.327	711.089	507.021	616.001	797.947	486.555	637.908	796.014	405.114	544.914	821.31	426.77	447.321	781.654	400.905
141	1.4	782.336	1243.34	180.736	825.042	1238.03	109.892	833.474	1237.33	251.885	944.759	1064.53	25.3775	928.716	1086.76	357.607	844.369	1042.56	195.223	714.452	793.904	-112.653	667.815	988.557	23.3633	731.977	1028.3	3.90998	681.221	1077.35	69.6036	672.09	1123.97	145.551	852.312	711.142	506.995	616.001	797.968	486.54	637.88	796.049	405.076	544.884	821.342	426.751	447.344	781.648	400.896
142	1.41	782.426	1243.65	180.513	825.134	1238.19	109.675	833.485	1237.54	251.683	944.868	1064.67	25.4392	928.67	1086.81	357.514	843.106	1042.76	195.493	711.356	796.393	-111.208	669.814	991.153	26.7851	733.286	1030.37	4.88765	685.209	1080.17	71.7986	678.899	1127.65	147.403	852.323	711.189	506.986	616.013	797.98	486.508	637.858	796.059	405.016	544.88	821.353	426.713	447.348	781.651	400.854
143	1.42	782.386	1243.96	180.326	825.17	1238.35	109.503	833.477	1237.73	251.523	945.076	1064.84	25.5639	928.636	1086.85	357.425	843.159	1042.75	195.342	708.39	798.886	-109.638	671.735	993.757	30.1094	734.564	1032.41	6.00444	689.027	1082.85	73.9224	685.735	1131.04	149.173	852.306	711.236	506.965	616.058	797.98	486.462	637.796	796.057	404.977	544.876	821.343	426.674	447.35	781.647	400.817
144	1.43	782.319	1244.28	180.161	825.164	1238.51	109.36	833.412	1237.93	251.358	945.4	1065.05	25.7444	928.611	1086.88	357.323	843.446	1042.68	195.175	705.575	801.229	-108.104	673.595	996.264	33.3239	735.855	1034.17	7.14482	692.896	1085.32	76.0132	692.597	1134.57	150.752	852.289	711.271	506.92	616.071	797.979	486.409	637.753	796.026	404.927	544.85	821.325	426.626	447.325	781.644	400.773
145	1.44	782.345	1244.6	180	825.19	1238.68	109.211	833.364	1238.11	251.221	945.361	1064.99	25.8378	928.595	1086.92	357.218	843.544	1042.66	195.042	702.711	803.393	-106.477	675.495	998.524	36.4689	737.18	1035.92	8.34928	696.673	1087.61	77.9893	698.861	1138.03	151.682	852.322	711.339	506.857	616.042	797.986	486.368	637.709	795.971	404.882	544.843	821.32	426.588	447.306	781.641	400.739
146	1.45	782.385	1244.88	179.889	825.24	1238.85	109.067	833.349	1238.29	251.1	945.375	1064.81	26.0325	928.589	1086.95	357.112	843.528	1042.69	194.926	699.965	805.515	-104.706	677.415	1000.78	39.5122	738.438	1037.61	9.50775	700.165	1089.78	79.8455	704.911	1140.32	153.11	852.342	711.363	506.798	616.047	797.982	486.334	637.714	795.928	404.85	544.846	821.307	426.556	447.295	781.643	400.702
147	1.46	782.344	1245.19	179.805	825.256	1239.04	108.974	833.368	1238.48	251.013	946.073	1065.2	26.4109	928.56	1086.94	357.057	843.446	1042.7	194.847	697.418	807.617	-102.913	679.4	1002.83	42.4997	739.761	1039.06	10.6587	703.546	1091.94	81.518	710.505	1142.93	154.253	852.308	711.368	506.76	616.08	797.981	486.324	637.698	795.916	404.84	544.8	821.287	426.548	447.284	781.655	400.681
148	1.47	782.407	1245.48	179.783	825.307	1239.21	108.935	833.345	1238.63	250.975	946.404	1065.56	26.5754	928.544	1086.96	357.023	843.415	1042.67	194.8	695.552	809.522	-100.774	681.448	1004.75	45.3902	741.298	1040.41	11.8531	706.809	1093.9	83.2427	715.113	1145.49	154.696	852.29	711.394	506.733	616.093	797.972	486.333	637.681	795.944	404.857	544.777	821.281	426.564	447.266	781.647	400.681
149	1.48	782.523	1245.76	179.796	825.386	1239.39	108.918	833.404	1238.77	250.974	945.777	1065.76	26.1426	928.549	1086.99	357.017	843.479	1042.62	194.799	694.593	811.118	-98.252	683.289	1006.6	48.1813	742.715	1041.68	13.1249	709.936	1095.68	84.7094	719.14	1147.92	154.562	852.273	711.412	506.703	616.087	797.963	486.353	637.668	795.989	404.857	544.802	821.275	426.591	447.257	781.628	400.702
150	1.49	782.68	1246.02	179.812	825.438	1239.54	108.914	833.482	1238.89	250.969	945.595	1066.04	25.9737	928.553	1087.01	356.979	843.366	1042.66	194.854	692.758	812.734	-96.0525	685.142	1008.35	50.8376	743.699	1042.82	14.4182	712.889	1097.36	86.2014	724.258	1150.12	155.293	852.2	711.402	506.66	616.048	797.956	486.36	637.688	796.008	404.859	544.85	821.28	426.626	447.29	781.611	400.737
151	1.5	782.786	1246.29	179.863	825.481	1239.72	108.93	833.511	1239.02	250.984	945.639	1065.84	26.3386	928.557	1087.04	356.966	843.318	1042.72	194.913	690.77	814.375	-94.0984	686.993	1009.96	53.2928	744.897	1043.9	15.6694	715.714	1098.85	87.607	728.702	1152.15	155.848	852.147	711.4	506.633	616.016	797.97	486.387	637.72	796.021	404.894	544.862	821.308	426.655	447.317	781.597	400.79
152	1.51	782.835	1246.58	179.885	825.483	1239.92	108.978	833.556	1239.18	250.993	945.629	1065.86	26.5011	928.547	1087.05	356.971	843.247	1042.77	194.978	688.865	816.015	-92.1161	688.576	1011.37	55.6444	746.061	1044.97	16.7774	718.242	1100.23	88.9125	732.631	1154.01	156.406	852.185	711.413	506.631	616.031	797.987	486.421	637.726	796.04	404.93	544.861	821.325	426.682	447.323	781.61	400.822
153	1.52	782.809	1246.86	179.897	825.439	1240.11	109.032	833.595	1239.3	251.015	945.621	1065.92	26.6191	928.544	1087.07	356.963	843.083	1042.87	195.033	687.042	817.559	-90.2463	690.093	1012.77	57.8769	747.115	1045.87	17.909	720.557	1101.5	90.2706	736.14	1155.56	157.063	852.209	711.427	506.621	616.068	798	486.44	637.713	796.052	404.949	544.87	821.346	426.703	447.322	781.632	400.834
154	1.53	782.846	1247.1	179.909	825.458	1240.27	109.077	833.616	1239.39	251.064	945.607	1065.96	26.73	928.55	1087.08	356.96	843.072	1042.89	195.03	685.341	818.84	-88.4306	691.557	1013.98	59.9499	748.179	1046.61	19.0987	722.714	1102.56	91.4596	739.429	1156.93	157.66	852.2	711.419	506.606	616.083	797.994	486.45	637.737	796.027	404.963	544.89	821.357	426.721	447.329	781.638	400.839
155	1.54	782.908	1247.34	179.945	825.513	1240.44	109.137	833.668	1239.45	251.119	945.579	1066	26.8336	928.529	1087.06	356.963	842.905	1042.95	195.072	683.917	819.932	-86.6905	692.881	1014.95	61.9549	748.912	1047.23	20.2274	724.77	1103.43	92.7748	742.469	1158.03	158.302	852.205	711.407	506.592	616.1	797.97	486.476	637.799	795.984	404.992	544.914	821.334	426.758	447.329	781.657	400.842
156	1.55	782.938	1247.56	179.992	825.567	1240.63	109.185	833.731	1239.48	251.211	945.567	1066.05	26.9291	928.516	1087.06	356.954	842.801	1043.01	195.15	682.478	820.911	-84.894	694.088	1015.83	63.8025	749.715	1047.8	21.4	726.554	1104.26	94.0189	745.129	1159.02	158.975	852.22	711.383	506.587	616.122	797.951	486.512	637.867	795.926	405.017	544.946	821.301	426.785	447.344	781.645	400.873
157	1.56	782.959	1247.83	180.06	825.614	1240.87	109.238	833.752	1239.54	251.288	945.562	1066.1	27.0111	928.519	1087.05	356.955	842.612	1043.07	195.21	681.01	821.838	-83.2057	695.048	1016.72	65.6376	750.672	1048.26	22.5988	728.256	1105.01	95.2141	747.465	1159.86	159.735	852.242	711.373	506.586	616.11	797.953	486.525	637.9	795.9	405.049	544.941	821.285	426.776	447.367	781.623	400.881
158	1.57	782.949	1248.12	180.149	825.654	1241.12	109.338	833.77	1239.59	251.388	945.52	1066.14	27.105	928.48	1087.04	356.978	842.483	1043.1	195.231	679.731	822.666	-81.5554	696.023	1017.47	67.4723	751.253	1048.62	23.7312	729.692	1105.62	96.4693	749.691	1160.67	160.535	852.247	711.346	506.603	616.105	797.944	486.533	637.854	795.905	405.053	544.928	821.298	426.78	447.357	781.622	400.89
159	1.58	782.88	1248.45	180.236	825.617	1241.42	109.427	833.787	1239.66	251.525	945.457	1066.19	27.2257	928.372	1087.02	357.017	842.34	1043.15	195.26	678.382	823.456	-79.9056	696.902	1018.1	69.2806	751.654	1048.98	24.9474	730.863	1106.09	97.667	751.65	1161.4	161.198	852.208	711.303	506.603	616.079	797.937	486.547	637.838	795.937	405.096	544.913	821.335	426.8	447.349	781.662	400.911
160	1.59	782.85	1248.74	180.388	825.648	1241.68	109.539	833.76	1239.69	251.651	945.357	1066.23	27.342	928.282	1087.03	357.058	842.271	1043.16	195.312	677.226	824.17	-78.3979	697.707	1018.62	70.9764	752.286	1049.26	26.1554	732.106	1106.44	98.8526	753.328	1162.05	161.733	852.226	711.3	506.627	616.067	797.953	486.572	637.824	795.967	405.118	544.882	821.339	426.807	447.346	781.688	400.921
161	1.6	782.862	1249.01	180.542	825.712	1241.92	109.668	833.791	1239.72	251.783	945.272	1066.28	27.4363	928.231	1087.04	357.094	842.221	1043.16	195.344	676.283	824.713	-76.8429	698.64	1018.98	72.7024	752.817	1049.41	27.1939	733.207	1106.74	99.9688	755.045	1162.63	162.325	852.233	711.288	506.671	616.061	797.977	486.579	637.821	795.993	405.098	544.889	821.35	426.807	447.329	781.687	400.915
162	1.61	782.965	1249.25	180.675	825.854	1242.14	109.809	833.801	1239.73	251.927	945.183	1066.31	27.5275	928.158	1087.01	357.137	842.326	1043.13	195.379	675.356	825.136	-75.3617	699.381	1019.26	74.2146	753.185	1049.52	28.2949	734.201	1106.99	101.033	756.618	1163.11	162.906	852.263	711.254	506.727	616.039	797.955	486.59	637.79	796.02	405.087	544.903	821.355	426.82	447.348	781.662	400.913
163	1.62	783.012	1249.49	180.82	825.93	1242.38	109.966	833.817	1239.75	252.121	945.054	1066.35	27.622	928.08	1086.99	357.178	842.444	1043.09	195.429	674.517	825.531	-73.9936	700.177	1019.52	75.7448	753.5	1049.61	29.384	735.244	1107.17	102.08	757.928	1163.49	163.544	852.266	711.212	506.768	616.003	797.93	486.592	637.774	796.024	405.094	544.897	821.332	426.825	447.381	781.652	400.929
164	1.63	783.151	1249.66	181.039	826.008	1242.64	110.191	833.822	1239.75	252.362	944.959	1066.41	27.7206	928.003	1086.97	357.24	842.555	1043.01	195.485	673.778	825.77	-72.5297	700.87	1019.64	77.1917	753.957	1049.61	30.3818	736.235	1107.31	103.093	759.424	1163.68	164.334	852.271	711.154	506.832	616.002	797.9	486.614	637.799	796.025	405.115	544.922	821.317	426.853	447.414	781.626	400.954
165	1.64	783.165	1249.84	181.269	826.104	1242.91	110.425	833.877	1239.73	252.586	944.865	1066.41	27.8093	927.96	1086.93	357.309	842.509	1043.01	195.544	672.941	825.986	-71.1815	701.417	1019.82	78.4842	754.389	1049.58	31.2591	737.227	1107.42	104.089	760.983	1163.74	165.068	852.294	711.109	506.909	616.028	797.876	486.65	637.841	796.028	405.14	544.937	821.315	426.865	447.417	781.616	400.944
166	1.65	783.144	1250.04	181.514	826.191	1243.17	110.651	833.944	1239.7	252.818	944.76	1066.42	27.8946	927.878	1086.9	357.383	842.488	1043	195.603	672.304	826.209	-69.876	702.071	1019.93	79.7524	754.678	1049.57	32.1433	738.254	1107.5	105.138	762.529	1163.78	165.654	852.321	711.072	506.998	616.048	797.85	486.677	637.89	796.008	405.165	544.944	821.313	426.872	447.42	781.636	400.943
167	1.66	783.101	1250.23	181.764	826.199	1243.43	110.875	833.986	1239.66	253.045	944.646	1066.44	27.9671	927.809	1086.87	357.426	842.312	1043.06	195.689	671.666	826.396	-68.5312	702.638	1020.03	80.9143	754.876	1049.56	33.008	739.283	1107.6	106.086	764.224	1163.76	166.202	852.334	711.022	507.049	616.052	797.833	486.677	637.934	795.991	405.186	544.963	821.3	426.854	447.39	781.669	400.933
168	1.67	783.031	1250.43	182.027	826.178	1243.67	111.128	833.961	1239.61	253.277	944.551	1066.45	28.0641	927.765	1086.87	357.504	842.11	1043.1	195.79	670.941	826.604	-67.2876	703.237	1020.13	82.0048	755.282	1049.5	33.848	740.386	1107.69	106.886	766.133	1163.64	166.712	852.398	711.03	507.134	616.067	797.843	486.685	637.963	795.979	405.215	544.979	821.313	426.848	447.392	781.687	400.936
169	1.68	782.897	1250.64	182.247	826.15	1243.86	111.369	833.927	1239.56	253.531	944.496	1066.48	28.1666	927.696	1086.87	357.589	842.032	1043.1	195.855	670.375	826.763	-65.9838	703.848	1020.22	83.1016	755.817	1049.44	34.6349	741.639	1107.72	107.727	768.004	1163.58	167.077	852.427	711.042	507.215	616.064	797.841	486.689	637.946	795.971	405.245	544.992	821.335	426.83	447.369	781.702	400.907
170	1.69	782.774	1250.77	182.464	826.088	1244.02	111.618	833.863	1239.48	253.816	944.431	1066.5	28.2402	927.602	1086.85	357.637	842.079	1043.05	195.863	669.896	826.872	-64.6416	704.592	1020.4	84.2285	756.401	1049.38	35.3408	742.944	1107.73	108.516	769.4	1163.71	167.156	852.402	711.015	507.301	616.026	797.819	486.676	637.938	795.979	405.23	544.963	821.323	426.812	447.373	781.708	400.882
171	1.7	782.729	1250.8	182.726	826.051	1244.15	111.857	833.788	1239.38	254.079	944.364	1066.53	28.3227	927.513	1086.86	357.685	842.118	1042.97	195.888	669.31	827.058	-63.4825	705.293	1020.65	85.1751	756.998	1049.33	36.0428	744.085	1107.73	109.129	770.148	1164.01	167.096	852.39	710.993	507.383	615.985	797.804	486.668	637.926	796	405.216	544.936	821.322	426.791	447.369	781.694	400.844
172	1.71	782.742	1250.8	183.031	825.988	1244.25	112.152	833.737	1239.26	254.39	944.315	1066.56	28.4264	927.444	1086.84	357.743	842.143	1042.91	195.928	668.801	827.2	-62.2723	705.899	1020.79	85.9942	757.638	1049.26	36.8108	744.98	1107.72	109.638	770.457	1164.35	167.23	852.439	710.99	507.485	615.99	797.796	486.694	637.885	796.026	405.198	544.917	821.324	426.79	447.378	781.694	400.856
173	1.72	782.684	1250.76	183.376	825.855	1244.35	112.507	833.637	1239.1	254.752	944.264	1066.6	28.5522	927.386	1086.83	357.809	842.171	1042.85	195.98	668.378	827.318	-60.9898	706.447	1020.92	86.8239	758.278	1049.12	37.6067	745.652	1107.74	110.096	770.53	1164.7	167.413	852.416	710.977	507.568	615.977	797.789	486.705	637.822	796.05	405.206	544.908	821.322	426.8	447.374	781.71	400.857
174	1.73	782.814	1250.62	183.828	825.713	1244.41	112.848	833.589	1238.93	255.113	944.211	1066.62	28.6426	927.308	1086.82	357.859	842.308	1042.77	195.998	668.074	827.415	-59.8454	707.089	1021.01	87.7208	758.82	1048.98	38.2562	746.248	1107.76	110.533	770.842	1165.01	167.744	852.369	710.934	507.653	615.964	797.777	486.7	637.807	796.07	405.192	544.88	821.308	426.781	447.383	781.684	400.844
175	1.74	782.942	1250.5	184.275	825.64	1244.46	113.129	833.627	1238.77	255.458	944.174	1066.65	28.7107	927.283	1086.79	357.896	842.475	1042.72	195.994	667.857	827.46	-58.9129	707.543	1021.13	88.4816	759.249	1048.84	38.7456	746.803	1107.76	110.914	771.585	1165.27	168.219	852.35	710.903	507.714	615.967	797.76	486.677	637.823	796.062	405.147	544.892	821.283	426.745	447.409	781.655	400.794
176	1.75	782.983	1250.41	184.842	825.525	1244.53	113.501	833.645	1238.61	255.792	944.188	1066.69	28.8224	927.277	1086.76	357.937	842.6	1042.7	196.017	667.562	827.465	-57.988	707.731	1021.25	89.1077	759.557	1048.76	39.217	747.259	1107.8	111.346	771.533	1165.47	168.281	852.359	710.85	507.785	615.98	797.746	486.676	637.866	796.029	405.131	544.938	821.256	426.735	447.429	781.625	400.771
177	1.76	782.872	1250.38	185.44	825.339	1244.62	113.95	833.736	1238.46	256.129	944.243	1066.77	28.9358	927.241	1086.74	357.983	842.557	1042.76	196.08	667.212	827.504	-57.0063	707.667	1021.43	89.6807	759.639	1048.72	39.7113	747.658	1107.82	111.772	770.884	1165.72	168.103	852.392	710.845	507.83	615.997	797.721	486.664	637.884	796.039	405.149	544.936	821.255	426.736	447.407	781.639	400.749
178	1.77	782.821	1250.37	186.037	825.169	1244.71	114.423	833.92	1238.32	256.495	944.265	1066.85	29.0268	927.235	1086.76	358.042	842.648	1042.78	196.151	666.998	827.518	-56.1066	707.616	1021.61	90.2567	759.548	1048.69	40.2416	747.937	1107.89	112.198	771.199	1165.92	168.361	852.344	710.815	507.861	616.005	797.712	486.662	637.907	796.079	405.174	544.927	821.279	426.727	447.423	781.665	400.743
179	1.78	782.744	1250.41	186.534	825.002	1244.85	114.892	834.195	1238.26	256.873	944.292	1066.94	29.1264	927.212	1086.79	358.087	842.744	1042.79	196.197	666.749	827.547	-55.3174	707.65	1021.78	90.857	759.414	1048.65	40.8389	748.106	1107.97	112.659	772.17	1166.07	168.953	852.314	710.814	507.879	615.995	797.713	486.653	637.917	796.112	405.175	544.936	821.307	426.718	447.417	781.713	400.737
180	1.79	782.668	1250.42	187.005	824.858	1244.95	115.391	834.491	1238.2	257.285	944.278	1067	29.2296	927.218	1086.81	358.156	842.798	1042.78	196.262	666.52	827.486	-54.5105	707.792	1021.85	91.5967	759.353	1048.61	41.4481	748.319	1108.03	113.19	772.667	1166.22	169.408	852.304	710.823	507.922	615.993	797.714	486.656	637.874	796.136	405.194	544.974	821.326	426.732	447.388	781.738	400.748
181	1.8	782.61	1250.39	187.492	824.716	1245.01	115.868	834.746	1238.09	257.705	944.284	1067.06	29.3501	927.218	1086.84	358.233	842.543	1042.88	196.359	666.263	827.427	-53.7012	707.925	1021.87	92.3416	759.394	1048.57	42.0101	748.662	1108.05	113.72	773.042	1166.41	169.77	852.28	710.849	507.961	615.968	797.715	486.671	637.836	796.133	405.209	544.923	821.331	426.71	447.369	781.751	400.748
182	1.81	782.693	1250.3	188.03	824.566	1245.01	116.273	834.998	1237.94	258.11	944.274	1067.11	29.4637	927.175	1086.82	358.28	842.364	1042.96	196.482	666.055	827.374	-52.9125	708.21	1021.79	92.9877	759.524	1048.48	42.4771	749.044	1108.03	114.185	773.506	1166.56	170.055	852.275	710.876	507.983	615.944	797.716	486.686	637.82	796.112	405.19	544.884	821.329	426.701	447.373	781.733	400.739
183	1.82	782.806	1250.17	188.586	824.41	1245.02	116.669	835.279	1237.79	258.52	944.216	1067.17	29.5802	927.147	1086.8	358.336	842.148	1043.05	196.622	665.877	827.335	-52.1815	708.334	1021.82	93.4872	759.715	1048.4	42.8829	749.354	1108.03	114.636	773.821	1166.74	170.272	852.313	710.884	508.004	615.923	797.735	486.695	637.793	796.093	405.16	544.87	821.323	426.709	447.401	781.715	400.739
184	1.83	782.896	1250.05	189.262	824.243	1245.01	117.071	835.465	1237.67	258.934	944.187	1067.25	29.7361	927.147	1086.79	358.415	842.077	1043.1	196.788	665.712	827.33	-51.4416	708.258	1021.94	93.9211	759.846	1048.33	43.3067	749.693	1107.99	115.098	774.071	1166.96	170.511	852.29	710.853	508.024	615.901	797.735	486.714	637.766	796.09	405.17	544.862	821.295	426.73	447.415	781.691	400.759
185	1.84	781.194	1250.51	190.39	824.078	1244.99	117.456	835.435	1237.55	259.34	944.163	1067.32	29.8789	927.141	1086.8	358.504	841.933	1043.16	196.95	665.499	827.359	-50.7973	708.216	1022.05	94.3947	759.909	1048.31	43.776	750.012	1107.97	115.501	774.443	1167.15	170.85	852.238	710.805	508.02	615.881	797.712	486.734	637.779	796.076	405.194	544.877	821.286	426.752	447.419	781.675	400.778
186	1.85	777.46	1251.59	192.071	823.895	1244.98	117.851	835.242	1237.38	259.747	944.149	1067.41	29.9946	927.181	1086.78	358.595	842.036	1043.15	197.079	665.399	827.381	-50.2137	708.209	1022.13	94.9042	759.928	1048.3	44.2726	750.229	1107.99	115.895	774.94	1167.29	171.303	852.228	710.75	508.031	615.926	797.697	486.756	637.826	796.068	405.209	544.91	821.287	426.778	447.447	781.666	400.819
187	1.86	776.62	1251.7	192.765	823.691	1244.96	118.248	835.32	1237.21	260.097	944.132	1067.5	30.119	927.186	1086.77	358.687	842.008	1043.15	197.189	665.347	827.421	-49.7184	708.129	1022.19	95.3834	759.871	1048.29	44.7178	750.337	1108.01	116.3	775.48	1167.37	171.812	852.257	710.687	508.023	615.964	797.668	486.777	637.926	796.078	405.254	544.941	821.285	426.803	447.452	781.673	400.838
188	1.87	776.453	1251.58	193.101	823.516	1244.92	118.704	835.497	1237.06	260.487	944.103	1067.58	30.2411	927.195	1086.75	358.766	842.057	1043.17	197.327	665.318	827.477	-49.3165	708.062	1022.21	95.823	759.787	1048.3	45.0738	750.425	1108.01	116.686	776.089	1167.38	172.344	852.26	710.597	508.039	615.972	797.649	486.783	637.997	796.093	405.304	544.985	821.281	426.84	447.464	781.681	400.855
189	1.88	776.452	1251.39	193.367	823.342	1244.84	119.121	835.706	1236.93	260.866	944.085	1067.65	30.3526	927.245	1086.74	358.828	842.062	1043.21	197.478	665.299	827.523	-49.0063	708.028	1022.19	96.1456	759.709	1048.3	45.3614	750.521	1107.98	116.983	776.627	1167.35	172.778	852.203	710.52	508.042	615.992	797.648	486.793	638.025	796.096	405.32	545.028	821.289	426.837	447.464	781.704	400.844
190	1.89	776.624	1251.1	193.728	823.193	1244.74	119.514	835.925	1236.79	261.241	944.031	1067.72	30.4492	927.28	1086.72	358.919	841.846	1043.29	197.672	665.292	827.519	-48.8033	707.897	1022.18	96.3597	759.611	1048.29	45.6043	750.593	1107.93	117.193	777.003	1167.3	173.115	852.209	710.514	508.023	616.021	797.668	486.813	638.022	796.083	405.317	545.051	821.325	426.831	447.471	781.714	400.828
191	1.9	776.912	1250.76	194.098	823.048	1244.64	119.876	836.138	1236.61	261.582	944.017	1067.8	30.5604	927.344	1086.71	359.026	841.604	1043.42	197.857	665.255	827.503	-48.7344	707.598	1022.21	96.4446	759.553	1048.24	45.7841	750.554	1107.9	117.373	777.292	1167.22	173.382	852.195	710.519	508.002	616.009	797.681	486.802	637.962	796.097	405.303	545.013	821.34	426.818	447.432	781.726	400.815
192	1.91	777.119	1250.4	194.557	822.942	1244.51	120.213	836.353	1236.42	261.913	944	1067.87	30.6662	927.44	1086.7	359.129	841.515	1043.49	198.031	665.279	827.474	-48.7681	707.279	1022.23	96.4349	759.51	1048.16	45.8973	750.525	1107.82	117.496	777.546	1167.1	173.594	852.158	710.493	507.991	615.998	797.681	486.809	637.937	796.128	405.308	544.961	821.351	426.807	447.408	781.738	400.802
193	1.92	777.249	1250.06	195.07	822.851	1244.39	120.514	836.588	1236.25	262.19	943.99	1067.94	30.7752	927.552	1086.68	359.231	841.284	1043.59	198.242	665.427	827.371	-48.9113	706.922	1022.25	96.3362	759.448	1048.05	45.9675	750.534	1107.75	117.553	777.699	1166.98	173.732	852.152	710.459	507.959	616.002	797.696	486.814	637.917	796.151	405.314	544.939	821.357	426.813	447.406	781.762	400.796
194	1.93	777.381	1249.67	195.549	822.737	1244.25	120.821	836.8	1236.05	262.458	943.967	1067.99	30.8991	927.641	1086.63	359.355	841.277	1043.62	198.411	665.628	827.207	-49.1476	706.524	1022.21	96.157	759.382	1047.93	46.0206	750.399	1107.63	117.604	777.876	1166.76	173.868	852.146	710.405	507.967	615.99	797.688	486.827	637.861	796.153	405.324	544.935	821.361	426.832	447.415	781.755	400.806
195	1.94	777.512	1249.27	195.963	822.688	1244.13	121.127	836.951	1235.81	262.681	943.99	1068.03	31.0017	927.783	1086.59	359.474	841.358	1043.61	198.562	665.911	826.986	-49.5211	706.062	1022.12	95.8483	759.341	1047.81	46.0506	750.243	1107.47	117.59	778.109	1166.5	173.975	852.079	710.317	507.961	615.985	797.673	486.845	637.875	796.124	405.321	544.949	821.348	426.842	447.458	781.735	400.814
196	1.95	777.631	1248.87	196.259	822.598	1244.02	121.433	837.068	1235.53	262.936	944.026	1068.09	31.1074	927.909	1086.56	359.583	841.47	1043.59	198.726	666.257	826.725	-50.0202	705.612	1021.99	95.4672	759.268	1047.66	46.0673	750.062	1107.27	117.549	778.255	1166.2	174.067	852.045	710.236	507.99	615.981	797.648	486.871	637.92	796.107	405.326	544.982	821.324	426.851	447.493	781.704	400.826
197	1.96	777.522	1248.55	196.544	822.411	1243.92	121.762	837.038	1235.19	263.201	944.091	1068.14	31.2202	928.021	1086.52	359.69	841.527	1043.61	198.883	666.633	826.475	-50.6389	704.963	1021.85	95.0201	759.109	1047.52	46.0691	749.678	1107.02	117.491	778.199	1165.92	174.159	852.017	710.162	508.027	615.953	797.62	486.894	637.976	796.103	405.369	544.996	821.302	426.884	447.493	781.7	400.848
198	1.97	777.446	1248.21	196.821	822.17	1243.87	122.085	836.922	1234.84	263.481	944.162	1068.18	31.333	928.122	1086.5	359.829	841.61	1043.62	199.017	667.066	826.229	-51.39	704.132	1021.76	94.4953	758.859	1047.36	46.0558	749.173	1106.73	117.412	778.047	1165.68	174.213	851.984	710.105	508.065	615.97	797.623	486.906	638.051	796.118	405.426	545.01	821.303	426.913	447.504	781.722	400.88
199	1.98	777.334	1247.91	197.066	821.974	1243.79	122.374	836.683	1234.47	263.76	944.247	1068.25	31.4371	928.255	1086.48	359.947	841.802	1043.6	199.106	667.714	825.879	-52.3399	703.235	1021.64	93.8848	758.546	1047.14	46.0089	748.583	1106.38	117.29	777.617	1165.45	174.215	851.999	710.068	508.1	616.001	797.616	486.911	638.053	796.129	405.441	545.048	821.315	426.922	447.528	781.75	400.886
200	1.99	777.248	1247.59	197.305	821.755	1243.69	122.704	836.371	1234.1	264.021	944.34	1068.28	31.5392	928.375	1086.48	360.11	841.923	1043.6	199.186	668.471	825.476	-53.4383	702.239	1021.43	93.1468	758.176	1046.86	45.9138	747.735	1105.97	117.112	776.969	1165.21	174.179	851.993	710.01	508.13	616.041	797.606	486.933	638.082	796.125	405.473	545.079	821.333	426.946	447.533	781.766	400.884
201	2	777.158	1247.23	197.525	821.463	1243.62	123.08	836.029	1233.74	264.287	944.403	1068.32	31.6516	928.5	1086.48	360.275	841.97	1043.59	199.279	669.245	824.989	-54.6435	701.195	1021.06	92.2799	757.757	1046.47	45.7615	746.577	1105.47	116.778	775.526	1164.88	173.942	851.976	709.939	508.157	616.081	797.587	486.968	638.106	796.135	405.494	545.088	821.34	426.962	447.533	781.779	400.911
202	2.01	777.09	1246.78	197.746	821.198	1243.52	123.432	835.769	1233.43	264.585	944.438	1068.35	31.7431	928.636	1086.46	360.426	842.024	1043.59	199.346	670.304	824.302	-56.0779	699.982	1020.41	91.1509	757.326	1045.92	45.5409	745.157	1104.82	116.24	772.915	1164.25	173.462	851.971	709.884	508.167	616.078	797.577	486.97	638.117	796.149	405.496	545.086	821.33	426.969	447.553	781.77	400.902
203	2.02	776.947	1246.27	198.075	820.979	1243.37	123.737	835.61	1233.17	264.889	944.429	1068.36	31.8186	928.802	1086.44	360.562	842.185	1043.55	199.4	671.636	823.422	-57.7375	698.706	1019.4	89.7666	756.781	1045.16	45.1766	743.502	1104.04	115.618	770.406	1163.38	173.428	851.982	709.835	508.164	616.064	797.564	486.951	638.097	796.138	405.469	545.101	821.334	426.949	447.568	781.762	400.847
204	2.03	776.622	1245.81	198.556	820.745	1243.24	124.054	835.534	1232.9	265.22	944.35	1068.34	31.9195	928.949	1086.42	360.717	842.293	1043.53	199.465	673.004	822.394	-59.5937	697.246	1018.34	88.1192	756.215	1044.25	44.7099	741.426	1103.02	114.946	767.438	1162.45	173.564	851.946	709.776	508.189	616.038	797.556	486.953	638.061	796.153	405.452	545.112	821.347	426.943	447.577	781.763	400.802
205	2.04	776.351	1245.4	199.11	820.452	1243.15	124.433	835.558	1232.66	265.554	944.266	1068.36	32.0128	929.061	1086.43	360.895	842.09	1043.6	199.654	674.67	821.267	-61.6922	695.359	1017.35	86.1099	755.692	1043.15	44.2124	738.989	1101.88	114.097	763.687	1161.34	173.708	851.957	709.747	508.2	616.014	797.539	486.963	638.002	796.188	405.478	545.074	821.365	426.942	447.533	781.786	400.793
206	2.05	776.236	1245.04	199.658	820.08	1243.05	124.886	835.787	1232.43	265.949	944.184	1068.37	32.1113	929.172	1086.44	361.088	841.564	1043.74	200.032	676.503	820.005	-63.932	693.398	1016.11	83.8166	755.164	1041.9	43.7528	736.422	1100.66	113.08	759.404	1159.96	173.543	851.961	709.708	508.205	616.03	797.527	486.968	637.99	796.209	405.502	545.055	821.367	426.947	447.536	781.821	400.791
207	2.06	776.313	1244.6	200.199	819.735	1242.93	125.386	836.044	1232.19	266.424	944.081	1068.33	32.166	929.317	1086.44	361.271	840.767	1043.91	200.647	678.533	818.498	-66.6244	691.481	1014.68	81.2228	754.64	1040.43	43.3633	733.65	1099.14	111.907	754.709	1158.2	173.365	851.924	709.624	508.216	616.028	797.499	486.974	638.002	796.216	405.497	545.083	821.362	426.955	447.534	781.817	400.761
208	2.07	776.544	1244.13	200.793	819.36	1242.81	125.967	836.272	1231.91	266.977	943.947	1068.28	32.2001	929.453	1086.39	361.431	839.679	1044.01	201.431	680.852	816.705	-69.4609	689.308	1013.17	78.247	754.146	1038.59	42.9168	730.732	1097.46	110.673	749.535	1156.17	173.101	851.87	709.515	508.235	616.035	797.451	486.991	638.026	796.207	405.471	545.107	821.338	426.946	447.546	781.807	400.75
209	2.08	776.85	1243.67	201.463	818.966	1242.72	126.62	836.449	1231.61	267.582	943.819	1068.22	32.2307	929.559	1086.35	361.586	839.058	1043.95	202.055	683.459	814.713	-72.3605	687.1	1011.35	75.0274	753.375	1036.72	42.3668	727.51	1095.42	109.294	744.043	1153.79	172.745	851.833	709.392	508.29	616.045	797.403	487.01	638.042	796.192	405.467	545.14	821.318	426.95	447.569	781.806	400.743
210	2.09	777.084	1243.28	202.294	818.571	1242.62	127.362	836.537	1231.32	268.239	943.867	1068.2	32.3466	929.673	1086.35	361.777	838.162	1044.08	202.646	686.4	812.581	-75.461	684.925	1009.28	71.6775	752.844	1034.67	42.0106	724.091	1093.24	107.944	738.146	1151.14	172.317	851.785	709.274	508.336	616.069	797.366	487.036	638.1	796.213	405.51	545.198	821.323	426.99	447.624	781.791	400.773
211	2.1	777.091	1242.95	203.167	818.217	1242.54	128.101	836.546	1231.03	268.89	943.992	1068.24	32.515	929.776	1086.34	361.952				689.541	810.457	-78.8405	682.7	1007	68.2351	752.088	1032.27	41.7819	720.226	1090.81	106.497	731.747	1148.17	171.834	851.716	709.195	508.393	616.076	797.355	487.061	638.107	796.247	405.543	545.217	821.327	427.024	447.659	781.773	400.787
212	2.11	777.145	1242.6	203.974	817.838	1242.48	128.84	836.704	1230.78	269.535	943.541	1068.1	32.3556	929.837	1086.32	362.125				692.766	808.364	-82.3912	680.367	1004.36	64.7352	750.648	1030.01	41.1199	716.206	1088.02	104.915	724.924	1144.7	171.338	851.647	709.147	508.476	616.095	797.352	487.081	638.083	796.251	405.554	545.193	821.329	427.014	447.671	781.785	400.771
213	2.12	777.404	1242.25	204.689	817.503	1242.47	129.558	836.898	1230.57	270.152	943.043	1067.88	32.1971	929.919	1086.28	362.27				696.363	805.989	-85.9478	677.898	1001.39	61.088	749.187	1027.65	40.1723	712.049	1085	103.283	717.809	1140.84	170.672	851.641	709.144	508.551	616.081	797.353	487.084	638.08	796.272	405.562	545.172	821.344	427.004	447.668	781.82	400.742
214	2.13	777.761	1241.92	205.512	817.121	1242.54	130.345	837.097	1230.37	270.772	942.736	1067.71	32.1418	930.026	1086.27	362.412	837.525	1044.64	204.02	700.047	803.452	-89.5682	675.457	998.26	57.2257	747.429	1025.18	38.9716	707.684	1081.81	101.445	710.57	1136.71	169.654	851.667	709.125	508.611	616.066	797.365	487.096	638.128	796.309	405.618	545.189	821.391	427.001	447.666	781.863	400.737
215	2.14	778.102	1241.61	206.521	816.662	1242.61	131.257	837.333	1230.13	271.511	942.527	1067.59	32.1474	930.117	1086.24	362.571	836.739	1044.52	204.563	703.463	800.984	-93.4347	673.268	994.876	53.1699	745.844	1022.45	37.9082	703.355	1078.59	99.4499	703.144	1132.25	168.379	851.645	709.069	508.66	616.069	797.359	487.125	638.152	796.335	405.682	545.174	821.42	427.023	447.643	781.906	400.759
216	2.15	778.218	1241.38	207.405	816.321	1242.64	132.08	837.473	1229.91	272.276	942.322	1067.48	32.1354	930.191	1086.2	362.723				706.693	798.509	-97.5652	670.294	991.646	48.6758	744.082	1019.43	36.7249	698.601	1075.23	97.4055	695.542	1127.59	166.841	851.552	708.971	508.71	616.069	797.347	487.149	638.188	796.32	405.732	545.143	821.422	427.035	447.628	781.905	400.76
217	2.16	778.346	1241.14	208.138	816.066	1242.67	132.805	837.502	1229.69	272.934	942.157	1067.36	32.129	930.266	1086.17	362.836				711.104	795.858	-101.23	666.584	988.605	43.8102	742.499	1016.13	35.5633	693.422	1071.01	95.2669	687.842	1122.61	164.816	851.481	708.877	508.779	616.059	797.329	487.192	638.235	796.313	405.751	545.15	821.399	427.043	447.64	781.871	400.757
218	2.17	778.471	1240.89	208.958	815.806	1242.73	133.529	837.585	1229.47	273.555	942.014	1067.22	32.1377	930.328	1086.12	362.961	836.627	1045.57	205.378	715.905	793.079	-104.779	664.82	984.829	38.9409	741.272	1012.47	34.7484	689.818	1066.68	92.302	680.03	1117.48	162.481	851.447	708.777	508.827	616.046	797.284	487.233	638.205	796.321	405.771	545.154	821.373	427.063	447.657	781.857	400.778
219	2.18	778.67	1240.64	209.903	815.422	1242.81	134.338	837.84	1229.26	274.218	941.884	1067.14	32.1511	930.375	1086.05	363.082	837.76	1045.01	204.966	720.985	790.185	-108.286	663.54	980.983	33.9595	740.023	1008.51	34.0727	685.743	1062.23	89.4826	672.057	1112.28	159.672	851.431	708.679	508.873	616.027	797.247	487.256	638.214	796.321	405.828	545.184	821.36	427.096	447.682	781.844	400.799
220	2.19	779.057	1240.41	210.758	814.995	1242.91	135.192	838.196	1229.03	274.867	941.765	1067.05	32.1147	930.373	1086	363.158	842.147	1043.99	203.336	726.271	787.336	-111.827	662.485	977.027	28.7103	738.845	1004.35	33.5231	681.657	1057.66	86.504	664.241	1106.39	156.611	851.414	708.589	508.923	616.017	797.215	487.275	638.279	796.32	405.894	545.208	821.346	427.117	447.669	781.848	400.813
221	2.2	779.557	1240.13	211.438	814.618	1243	135.951	838.606	1228.83	275.452	941.668	1066.96	32.0664	930.355	1085.95	363.203	847.073	1042.51	201.881	731.817	784.555	-115.324	661.799	973.092	23.2192	737.69	999.874	32.8579	677.622	1052.78	83.4741	656.373	1100.15	153.367	851.423	708.5	508.965	616.051	797.189	487.315	638.386	796.326	405.964	545.24	821.331	427.139	447.684	781.859	400.823
222	2.21	779.605	1240	212.079	814.332	1243.09	136.558	839.05	1228.65	276.014	941.6	1066.87	32.0243	930.353	1085.92	363.249	848.42	1041.71	201.503	737.481	781.792	-118.552	661.049	969.252	17.7045	736.38	995.319	32.0175	673.699	1047.62	80.4331	648.409	1093.55	149.912	851.436	708.428	508.99	616.091	797.169	487.349	638.443	796.328	406.035	545.261	821.334	427.153	447.7	781.864	400.821
223	2.22	779.524	1239.92	212.731	814.193	1243.18	137.057	839.332	1228.46	276.555	941.582	1066.74	31.9737	930.332	1085.88	363.28	848.776	1041.47	201.463	743.317	779.024	-121.651	660.394	965.401	11.9987	734.924	990.234	31.3648	669.732	1042.24	77.363	640.348	1086.57	146.294	851.398	708.358	509.007	616.087	797.149	487.365	638.483	796.336	406.078	545.276	821.312	427.172	447.714	781.854	400.845
224	2.23	779.434	1239.9	213.373	814.03	1243.28	137.526	839.406	1228.29	277.012	941.534	1066.63	31.8884	930.275	1085.85	363.265	848.852	1041.36	201.48	749.283	776.27	-124.773	660.016	961.516	6.36025	733.091	984.203	31.1018	665.757	1036.64	74.1847	632.091	1079.18	142.359	851.339	708.299	509.025	616.1	797.137	487.37	638.516	796.362	406.071	545.311	821.307	427.186	447.737	781.844	400.849
225	2.24	779.43	1239.87	214.058	813.789	1243.39	138.075	839.448	1228.12	277.466	941.491	1066.53	31.801	930.177	1085.83	363.255	848.881	1041.31	201.5	755.319	773.612	-127.717	659.755	957.523	0.7772	731.18	978.576	30.5688	661.756	1030.71	71.009	623.784	1071.44	138.228	851.315	708.267	509.041	616.127	797.15	487.367	638.483	796.393	406.055	545.315	821.323	427.188	447.759	781.855	400.873
226	2.25	779.432	1239.8	214.699	813.561	1243.47	138.643	839.445	1227.94	277.861	941.496	1066.45	31.7306	930.032	1085.82	363.214	848.692	1041.32	201.482	761.384	771.039	-130.347	659.62	953.375	-4.72086	729.162	972.906	29.951	657.849	1024.61	67.7566	615.645	1063.41	133.721	851.285	708.247	509.022	616.123	797.175	487.356	638.435	796.407	406.043	545.27	821.355	427.181	447.741	781.872	400.892
227	2.26	779.466	1239.7	215.201	813.385	1243.54	139.135	839.45	1227.8	278.195	941.465	1066.34	31.6381	929.905	1085.81	363.163	848.576	1041.32	201.427	767.553	768.418	-132.877	659.677	949.155	-10.1986	727.392	967.092	29.1134	654.094	1018.29	64.3268	607.664	1055.13	128.76	851.297	708.264	509.001	616.092	797.206	487.357	638.421	796.406	406.048	545.231	821.372	427.166	447.725	781.872	400.886
228	2.27	779.442	1239.62	215.54	813.213	1243.58	139.524	839.478	1227.66	278.477	941.395	1066.22	31.5106	929.78	1085.79	363.113	848.462	1041.3	201.359	773.772	765.812	-135.315	659.789	944.835	-15.5176	726.302	963.08	28.3769	650.351	1011.63	60.7354	599.982	1046.57	123.492	851.271	708.26	508.948	616.062	797.237	487.349	638.47	796.377	406.051	545.217	821.37	427.131	447.719	781.886	400.86
229	2.28	779.456	1239.52	215.822	813.066	1243.59	139.863	839.501	1227.53	278.718	941.355	1066.1	31.3878	929.626	1085.76	363.052	848.369	1041.26	201.314	779.925	763.275	-137.511	659.959	940.302	-20.7058				646.624	1004.9	56.9792	592.641	1037.83	118.017	851.285	708.242	508.907	616.071	797.261	487.33	638.417	796.335	406.015	545.187	821.376	427.113	447.714	781.889	400.849
230	2.29	779.418	1239.48	216.041	812.96	1243.61	140.128	839.506	1227.42	278.917	941.329	1065.97	31.2822	929.537	1085.74	363.003	848.231	1041.27	201.28	786.051	760.842	-139.603	660.133	935.682	-25.7089				642.933	998.026	53.0935	585.576	1028.94	112.371	851.278	708.205	508.852	616.049	797.268	487.315	638.368	796.321	406.013	545.167	821.398	427.113	447.693	781.888	400.86
231	2.3	779.471	1239.41	216.278	812.915	1243.6	140.302	839.489	1227.29	279.085	941.299	1065.83	31.1706	929.466	1085.71	362.957	848.14	1041.26	201.282	791.991	758.452	-141.477	660.273	930.897	-30.511				639.41	990.976	49.0744	578.828	1020.02	106.518	851.242	708.135	508.803	616.022	797.252	487.332	638.363	796.293	406.017	545.184	821.382	427.129	447.702	781.862	400.879
232	2.31	779.462	1239.34	216.461	812.884	1243.58	140.429	839.494	1227.16	279.225	941.245	1065.69	31.0413	929.378	1085.66	362.904	848.183	1041.15	201.269	798.076	756.081	-143.122	660.496	925.907	-35.2918				636.031	983.732	45.0415	571.979	1011.11	100.005	851.237	708.063	508.742	616.012	797.227	487.334	638.388	796.281	405.992	545.193	821.363	427.137	447.7	781.837	400.895
233	2.32	779.488	1239.28	216.574	812.883	1243.54	140.534	839.495	1227.07	279.318	941.234	1065.52	30.9263	929.315	1085.63	362.85	848.21	1041.05	201.254	804.066	753.765	-144.644	660.777	920.756	-39.9987				632.796	976.427	40.9616	565.014	1002.14	92.7771	851.27	708.015	508.692	615.995	797.231	487.312	638.381	796.285	405.948	545.212	821.342	427.161	447.693	781.81	400.912
234	2.33	779.496	1239.23	216.607	812.833	1243.52	140.587	839.419	1226.99	279.326	941.228	1065.39	30.7753	929.254	1085.59	362.762	848.104	1041.02	201.193	809.852	751.484	-145.897	661.095	915.547	-44.5329				629.383	969.107	36.549	559.314	993.161	86.1737	851.26	707.943	508.597	616.006	797.248	487.288	638.336	796.277	405.885	545.214	821.331	427.152	447.685	781.81	400.918
235	2.34	779.504	1239.16	216.581	812.83	1243.48	140.587	839.336	1226.93	279.31	941.221	1065.25	30.5928	929.181	1085.54	362.674	847.984	1041.03	201.083	815.58	749.225	-146.885	661.407	910.36	-48.9568				626.05	961.719	32.0002	554.096	983.964	79.5146	851.262	707.859	508.496	616.02	797.277	487.264	638.308	796.276	405.831	545.187	821.341	427.132	447.678	781.816	400.912
236	2.35	779.381	1239.14	216.517	812.772	1243.46	140.548	839.298	1226.88	279.277	941.216	1065.1	30.4197	929.111	1085.5	362.582	847.909	1041.01	200.953	820.964	746.989	-147.8	661.581	905.201	-53.3819				622.749	954.366	27.3803	549.048	974.781	72.7214	851.268	707.815	508.39	616.051	797.3	487.236	638.321	796.292	405.799	545.181	821.354	427.095	447.681	781.824	400.885
237	2.36	779.345	1239.08	216.435	812.775	1243.4	140.477	839.284	1226.83	279.218	941.235	1064.9	30.2157	929.06	1085.46	362.485	847.859	1040.98	200.832	825.961	744.703	-148.625	661.956	899.969	-57.8002				619.716	947.038	22.5906	544.318	965.321	65.8325	851.301	707.783	508.291	616.089	797.329	487.205	638.259	796.291	405.746	545.191	821.379	427.073	447.665	781.827	400.843
238	2.37	779.324	1239	216.312	812.794	1243.29	140.361	839.248	1226.78	279.144	941.292	1064.67	29.9906	929.041	1085.39	362.353	847.821	1040.93	200.673	830.533	742.42	-149.278	662.389	894.687	-62.113				616.882	939.717	17.7495	539.494	955.438	58.9432	851.275	707.705	508.158	616.109	797.354	487.159	638.2	796.277	405.675	545.181	821.394	427.036	447.642	781.84	400.783
239	2.38	779.304	1238.91	216.184	812.795	1243.18	140.249	839.169	1226.7	279.035	941.376	1064.44	29.7944	929.013	1085.35	362.227	847.789	1040.88	200.509	835.539	740.311	-149.465	662.884	889.383	-66.2803	697.997	887.372	3.15234	613.936	932.516	12.8716	534.966	945.978	51.8775	851.336	707.647	508.062	616.123	797.378	487.134	638.175	796.276	405.634	545.199	821.399	427.036	447.651	781.845	400.785
240	2.39	779.276	1238.78	216.067	812.79	1243.04	140.089	839.105	1226.59	278.894	941.455	1064.21	29.5759	928.993	1085.3	362.1	847.771	1040.84	200.358	841.046	738.416	-149.148	663.226	884.226	-70.2143	695.772	882.884	1.08434	611.339	925.449	7.98101	530.952	936.916	44.8238	851.422	707.602	507.975	616.147	797.39	487.115	638.156	796.272	405.613	545.212	821.393	427.04	447.621	781.854	400.8
241	2.4	779.217	1238.64	215.911	812.802	1242.86	139.898	839.044	1226.49	278.739	941.536	1063.96	29.3275	928.985	1085.27	361.98	847.764	1040.77	200.163	845.713	736.539	-148.991	663.648	879.145	-74.0335	693.694	877.703	-1.74888	609.061	918.562	3.15981	527.497	928.204	37.8451	851.447	707.581	507.897	616.171	797.398	487.108	638.111	796.257	405.578	545.223	821.383	427.027	447.613	781.841	400.801
242	2.41	779.107	1238.46	215.702	812.856	1242.67	139.639	838.931	1226.36	278.499	941.608	1063.71	29.0425	928.965	1085.22	361.857	847.729	1040.71	199.931	849.994	734.751	-148.832	664.269	874.023	-77.6954	691.848	872.515	-4.49318	606.873	911.822	-1.65438	524.32	919.845	30.9263	851.483	707.552	507.78	616.164	797.4	487.072	638.138	796.217	405.542	545.217	821.367	427.006	447.592	781.813	400.767
243	2.42	779.033	1238.18	215.466	812.906	1242.45	139.334	838.83	1226.23	278.263	941.677	1063.48	28.7659	928.911	1085.2	361.722	847.841	1040.6	199.764	854.178	732.946	-148.53	664.942	868.997	-81.1533	690.624	867.656	-7.45304	604.938	905.337	-6.33312	521.117	912.096	24.1062	851.496	707.552	507.697	616.159	797.398	487.061	638.131	796.175	405.525	545.179	821.345	427.008	447.623	781.798	400.789
244	2.43	778.901	1237.89	215.134	812.989	1242.19	138.987	838.75	1226.08	278.002	941.779	1063.26	28.5115	928.924	1085.21	361.578	847.904	1040.5	199.577	858.048	731.085	-148.127	665.622	864.196	-84.3809	689.701	863.076	-10.209	603.224	898.981	-10.7573	518.202	904.682	17.4019	851.518	707.565	507.635	616.167	797.409	487.067	638.15	796.15	405.534	545.167	821.35	427.024	447.651	781.812	400.831
[truncated: 1,388 more rows]

## Sheet: Trial02
PathFileType	4	(X/Y/Z)	Trial02.trc
DataRate	CameraRate	NumFrames	NumMarkers	Units	OrigDataRate	OrigDataStartFrame	OrigNumFrames
100	100	1315	16	mm	100	1	1315
[truncated: 1,317 more rows]

## Sheet: Trial03
PathFileType	4	(X/Y/Z)	Trial03.trc
DataRate	CameraRate	NumFrames	NumMarkers	Units	OrigDataRate	OrigDataStartFrame	OrigNumFrames
[truncated: 1,412 more rows]
[truncated: 9 more columns]
