# Supplementary material for: Upper-Limb Kinematic Variables are correlated with Fugl-Meyer Assessment Sub Scales During a Hand-to-Mouth Functional Task in Post-Stroke Individuals
Source: Research Square preprint supplement (doi:10.21203/rs.3.rs-8270137/v1), 2025-12-16
Supplement: Supplementary file 4 [file Additional file 10.xls]

## Sheet: Static
PathFileType	4	(X/Y/Z)	Static.trc
DataRate	CameraRate	NumFrames	NumMarkers	Units	OrigDataRate	OrigDataStartFrame	OrigNumFrames
100	100	560	17	mm	100	1	560
Frame#	Time	nasion			r zyg pr			l zyg pr			r should			l should			sternum			r elbow			r ulna			r radius			r hand			r finger			l elbow			l ulna			l radius			l hand			l finger
		X1	Y1	Z1	X2	Y2	Z2	X3	Y3	Z3	X4	Y4	Z4	X5	Y5	Z5	X6	Y6	Z6	X7	Y7	Z7	X8	Y8	Z8	X9	Y9	Z9	X10	Y10	Z10	X11	Y11	Z11	X12	Y12	Z12	X13	Y13	Z13	X14	Y14	Z14	X15	Y15	Z15	X16	Y16	Z16
1	0	474.311	1171.88	139.415	401.096	1169.35	90.6531	542.078	1182.68	88.2319	306.476	1040.08	-35.3532	653.853	1036.44	-46.1292	483.673	968.402	41.024	238.162	689.118	-87.5993	205.79	734.71	185.698	279.995	752.179	184.009	256.871	762.017	261.826	274.579	729.701	361.495	724.96	678.761	-73.6056	752.95	738.233	192.245	683.162	757.681	187.96	704.72	759.621	277.187	689.424	730.803	370.884
2	0.01	474.482	1171.79	139.511	401.211	1169.31	90.6716	542.004	1181.66	89.0838	306.594	1040.04	-35.36	653.958	1036.41	-46.0818	483.826	968.302	41.0239	238.198	689.098	-87.6137	205.957	734.652	185.788	280.148	752.121	184.095	257.012	762.044	261.839	274.682	729.656	361.536	725.032	678.741	-73.6729	753.039	738.158	192.204	683.281	757.621	187.918	704.828	759.59	277.151	689.534	730.727	370.875
3	0.02	474.572	1171.67	139.31	401.286	1169.28	90.6596	542.093	1181.65	88.8977	306.647	1040.02	-35.3948	654.013	1036.39	-46.1248	483.927	968.209	40.8675	238.219	689.056	-87.6055	206.034	734.621	185.779	280.241	752.083	184.068	257.066	762.054	261.776	274.74	729.646	361.532	725.047	678.712	-73.6991	753.103	738.098	192.111	683.355	757.563	187.783	704.892	759.538	277.053	689.599	730.661	370.808
4	0.03	474.589	1171.67	139.192	401.281	1169.28	90.6195	542.233	1182.21	88.192	306.632	1040.01	-35.443	653.996	1036.38	-46.1794	483.914	968.174	40.7631	238.208	689.026	-87.5965	206	734.628	185.713	280.229	752.076	184.008	257.042	762.065	261.698	274.72	729.651	361.468	725	678.604	-73.6077	753.105	738.071	192.039	683.358	757.547	187.732	704.902	759.505	276.967	689.6	730.655	370.768
5	0.04	474.575	1171.81	139.534	401.249	1169.3	90.6745	542.147	1182.09	88.3929	306.592	1040.02	-35.4401	653.934	1036.37	-46.169	483.867	968.266	40.958	238.147	689.022	-87.6088	205.919	734.651	185.705	280.175	752.126	184.054	257.024	762.1	261.79	274.669	729.667	361.48	724.903	678.5	-73.4701	753.035	738.097	192.052	683.313	757.614	187.829	704.845	759.53	277.016	689.544	730.726	370.867
6	0.05	474.545	1171.92	139.914	401.227	1169.33	90.7887	541.983	1181.8	88.8045	306.55	1040.03	-35.3991	653.862	1036.36	-46.139	483.801	968.385	41.2274	238.091	689.024	-87.647	205.849	734.677	185.755	280.131	752.205	184.159	256.997	762.12	261.919	274.6	729.688	361.508	724.804	678.448	-73.409	752.955	738.143	192.07	683.249	757.7	187.991	704.771	759.583	277.094	689.448	730.821	370.985
7	0.06	474.487	1171.91	139.883	401.183	1169.35	90.7578	541.997	1182.07	88.6078	306.5	1040.04	-35.4331	653.807	1036.36	-46.1602	483.724	968.386	41.161	238.065	689.049	-87.6971	205.774	734.687	185.704	280.066	752.219	184.106	256.945	762.107	261.858	274.535	729.689	361.435	724.745	678.479	-73.426	752.918	738.194	192.064	683.156	757.757	188.017	704.698	759.627	277.097	689.373	730.886	371.024
8	0.07	474.483	1171.84	139.735	401.194	1169.34	90.6997	541.936	1181.81	88.8993	306.498	1040.05	-35.4659	653.81	1036.37	-46.1777	483.721	968.308	40.9781	238.071	689.099	-87.7238	205.771	734.671	185.634	280.04	752.194	184.035	256.908	762.088	261.742	274.537	729.672	361.378	724.736	678.574	-73.5057	752.929	738.217	192.095	683.143	757.766	187.994	704.672	759.624	277.091	689.363	730.908	371.027
9	0.08	474.557	1171.76	139.589	401.26	1169.31	90.7144	542.101	1182.26	88.4182	306.555	1040.04	-35.4104	653.868	1036.37	-46.1423	483.804	968.201	40.9001	238.108	689.15	-87.7304	205.877	734.648	185.691	280.12	752.144	184.07	256.957	762.078	261.776	274.612	729.659	361.457	724.793	678.697	-73.6257	752.963	738.21	192.133	683.203	757.721	187.973	704.726	759.61	277.14	689.392	730.873	371.052
10	0.09	474.625	1171.67	139.45	401.321	1169.28	90.7233	542.195	1182.14	88.5898	306.62	1040.03	-35.3977	653.947	1036.36	-46.1146	483.883	968.115	40.8127	238.185	689.185	-87.7362	205.988	734.605	185.761	280.198	752.086	184.054	257	762.054	261.771	274.687	729.653	361.526	724.866	678.776	-73.7322	753.018	738.168	192.165	683.271	757.655	187.934	704.792	759.588	277.15	689.437	730.797	371.021
11	0.1	474.663	1171.62	139.364	401.331	1169.26	90.644	542.177	1181.78	88.8701	306.65	1040.02	-35.4431	653.988	1036.36	-46.154	483.895	968.051	40.6325	238.269	689.148	-87.6751	206.015	734.594	185.724	280.211	752.05	184.01	257.004	762.037	261.686	274.708	729.641	361.508	724.941	678.784	-73.7914	753.078	738.143	192.146	683.302	757.579	187.817	704.829	759.565	277.103	689.483	730.727	370.912
12	0.11	474.66	1171.66	139.312	401.314	1169.27	90.6101	542.292	1182.27	88.3267	306.648	1040.01	-35.4826	653.998	1036.37	-46.1951	483.867	968.084	40.6438	238.308	689.071	-87.6159	205.978	734.628	185.689	280.173	752.048	183.984	256.982	762.054	261.674	274.697	729.656	361.489	724.997	678.708	-73.732	753.094	738.133	192.111	683.304	757.559	187.768	704.842	759.545	277.057	689.495	730.701	370.847
13	0.12	474.617	1171.75	139.519	401.315	1169.32	90.7038	542.265	1182.34	88.2514	306.637	1040	-35.4638	653.968	1036.36	-46.1813	483.821	968.199	40.8511	238.296	688.98	-87.5686	205.924	734.682	185.73	280.145	752.124	184.078	256.987	762.086	261.809	274.667	729.696	361.52	724.986	678.563	-73.5922	753.042	738.153	192.091	683.277	757.61	187.861	704.822	759.55	277.09	689.45	730.739	370.892
14	0.13	474.562	1171.87	139.73	401.275	1169.36	90.7164	542.218	1182.34	88.2452	306.6	1039.98	-35.4692	653.916	1036.34	-46.1849	483.754	968.318	41.0123	238.251	688.913	-87.5594	205.859	734.728	185.76	280.113	752.206	184.149	256.962	762.105	261.867	274.609	729.726	361.474	724.91	678.423	-73.4432	752.982	738.164	192.067	683.233	757.669	187.94	704.785	759.565	277.096	689.394	730.79	370.928
15	0.14	474.534	1171.88	139.662	401.248	1169.37	90.6776	542.156	1182.13	88.393	306.536	1039.96	-35.5281	653.858	1036.31	-46.2326	483.718	968.329	41.0039	238.205	688.867	-87.5808	205.799	734.711	185.711	280.044	752.195	184.065	256.929	762.084	261.793	274.56	729.721	361.413	724.828	678.329	-73.3221	752.963	738.16	192.06	683.207	757.688	187.886	704.75	759.54	277.019	689.365	730.813	370.935
16	0.15	474.586	1171.84	139.576	401.282	1169.34	90.6497	542.116	1181.8	88.7184	306.525	1039.93	-35.5548	653.846	1036.29	-46.2394	483.755	968.267	40.9364	238.169	688.871	-87.6087	205.816	734.663	185.677	280.064	752.161	184.024	256.952	762.048	261.731	274.56	729.675	361.389	724.766	678.327	-73.2998	752.969	738.152	192.032	683.216	757.658	187.864	704.751	759.526	276.993	689.377	730.794	370.958
17	0.16	474.661	1171.82	139.532	401.336	1169.33	90.6689	542.203	1182.02	88.5195	306.557	1039.94	-35.551	653.874	1036.3	-46.2356	483.831	968.17	40.864	238.159	688.934	-87.6761	205.883	734.628	185.697	280.151	752.131	184.075	257	762.049	261.742	274.61	729.634	361.424	724.743	678.447	-73.4581	752.985	738.133	192.03	683.247	757.652	187.91	704.774	759.536	277.027	689.397	730.796	370.986
18	0.17	474.726	1171.78	139.413	401.377	1169.31	90.6929	542.07	1181.46	88.9763	306.595	1039.95	-35.5597	653.903	1036.32	-46.2383	483.883	968.091	40.7521	238.153	689.025	-87.7656	205.939	734.597	185.69	280.208	752.08	184.084	257.029	762.066	261.752	274.665	729.614	361.482	724.751	678.622	-73.6748	752.997	738.118	192.071	683.291	757.658	187.916	704.799	759.558	277.068	689.407	730.791	371.002
19	0.18	474.728	1171.76	139.264	401.39	1169.28	90.6757	542.048	1181.34	89.1406	306.632	1039.95	-35.575	653.94	1036.34	-46.2309	483.915	968.043	40.6734	238.183	689.068	-87.772	205.977	734.582	185.689	280.215	752.05	184.035	257.018	762.086	261.772	274.712	729.628	361.484	724.805	678.758	-73.8228	753.037	738.111	192.117	683.297	757.644	187.876	704.816	759.574	277.107	689.414	730.786	371.027
20	0.19	474.714	1171.77	139.298	401.374	1169.3	90.6808	542.037	1181.33	89.2024	306.654	1039.96	-35.5387	653.967	1036.37	-46.2061	483.914	968.059	40.7015	238.256	689.079	-87.7471	205.991	734.612	185.741	280.201	752.076	184.044	257.005	762.112	261.805	274.718	729.669	361.514	724.877	678.82	-73.8643	753.056	738.139	192.143	683.295	757.666	187.909	704.821	759.61	277.144	689.419	730.803	371.008
21	0.2	474.684	1171.87	139.493	401.329	1169.34	90.6557	542.099	1181.67	89.0058	306.644	1039.96	-35.4996	653.956	1036.38	-46.1966	483.873	968.118	40.7961	238.31	689.047	-87.7002	205.95	734.664	185.766	280.158	752.121	184.068	256.965	762.127	261.804	274.69	729.712	361.531	724.918	678.786	-73.8	753.027	738.187	192.153	683.265	757.69	187.928	704.8	759.623	277.163	689.421	730.821	370.97
22	0.21	474.585	1171.86	139.54	401.28	1169.35	90.6555	542.249	1182.36	88.4791	306.617	1039.93	-35.4774	653.932	1036.36	-46.2147	483.804	968.149	40.8045	238.329	688.968	-87.6274	205.878	734.691	185.736	280.096	752.141	184.048	256.927	762.095	261.793	274.631	729.719	361.503	724.919	678.651	-73.629	753	738.22	192.162	683.204	757.682	187.9	704.774	759.605	277.108	689.386	730.822	370.944
23	0.22	474.524	1171.83	139.585	401.26	1169.35	90.7013	542.192	1182.22	88.5417	306.597	1039.88	-35.4936	653.919	1036.31	-46.2028	483.755	968.141	40.8138	238.325	688.872	-87.5747	205.826	734.691	185.7	280.081	752.146	184.057	256.922	762.034	261.763	274.586	729.703	361.46	724.895	678.46	-73.4244	752.992	738.215	192.122	683.18	757.66	187.89	704.77	759.567	277.075	689.373	730.795	370.912
24	0.23	474.544	1171.82	139.616	401.261	1169.34	90.7143	542.036	1181.53	89.0809	306.581	1039.85	-35.5126	653.895	1036.27	-46.1883	483.764	968.139	40.8347	238.305	688.799	-87.5719	205.803	734.669	185.641	280.102	752.142	184.077	256.936	762.021	261.721	274.563	729.679	361.411	724.856	678.331	-73.3207	752.997	738.181	192.04	683.197	757.634	187.848	704.766	759.53	277.05	689.397	730.767	370.848
25	0.24	474.558	1171.74	139.534	401.276	1169.3	90.7044	542.007	1181.31	89.2107	306.571	1039.84	-35.5327	653.874	1036.26	-46.2073	483.803	968.08	40.7363	238.273	688.788	-87.6054	205.807	734.646	185.615	280.135	752.126	184.071	256.952	762.034	261.707	274.572	729.649	361.399	724.797	678.266	-73.2752	752.986	738.118	192.015	683.219	757.604	187.754	704.766	759.507	277	689.424	730.743	370.836
26	0.25	474.63	1171.72	139.609	401.302	1169.27	90.7711	542.087	1181.51	89.0856	306.585	1039.85	-35.5409	653.86	1036.26	-46.2069	483.839	968.002	40.6696	238.253	688.808	-87.6425	205.856	734.616	185.647	280.165	752.104	184.062	257.004	762.046	261.758	274.61	729.634	361.439	724.78	678.298	-73.3304	752.975	738.087	192.025	683.246	757.609	187.785	704.785	759.502	276.991	689.46	730.731	370.873
27	0.26	474.688	1171.68	139.64	401.327	1169.25	90.7832	542.273	1182.15	88.5854	306.628	1039.87	-35.5285	653.893	1036.29	-46.1882	483.88	967.986	40.738	238.253	688.859	-87.6717	205.923	734.611	185.714	280.207	752.103	184.052	257.04	762.082	261.813	274.669	729.651	361.488	724.789	678.428	-73.5033	752.987	738.093	192.026	683.267	757.648	187.872	704.816	759.539	277.031	689.491	730.762	370.935
28	0.27	474.711	1171.66	139.662	401.338	1169.25	90.7721	542.253	1182.28	88.2685	306.643	1039.91	-35.5538	653.924	1036.33	-46.1963	483.903	967.988	40.7419	238.264	688.932	-87.7369	205.949	734.638	185.71	280.184	752.098	184.021	257.025	762.107	261.791	274.689	729.68	361.492	724.82	678.605	-73.7219	752.991	738.107	192.027	683.257	757.666	187.868	704.803	759.578	277.055	689.492	730.799	370.925
29	0.28	474.689	1171.66	139.614	401.328	1169.24	90.785	542.231	1182.31	88.2185	306.631	1039.92	-35.5699	653.922	1036.35	-46.202	483.873	967.973	40.6663	238.269	688.988	-87.7642	205.925	734.651	185.671	280.164	752.104	184.02	256.968	762.108	261.748	274.689	729.7	361.508	724.87	678.722	-73.8371	752.979	738.149	192.059	683.224	757.683	187.875	704.765	759.604	277.063	689.473	730.828	370.921
30	0.29	474.68	1171.66	139.744	401.33	1169.22	90.8407	542.295	1182.38	88.4145	306.622	1039.9	-35.513	653.931	1036.35	-46.1578	483.869	967.995	40.7305	238.293	688.981	-87.7337	205.912	734.667	185.719	280.153	752.114	184.055	256.959	762.074	261.799	274.685	729.706	361.523	724.908	678.75	-73.8406	752.977	738.185	192.11	683.224	757.665	187.924	704.748	759.618	277.148	689.463	730.813	370.921
31	0.3	474.666	1171.62	139.772	401.349	1169.2	90.9082	542.242	1182.1	88.7189	306.63	1039.88	-35.4567	653.947	1036.34	-46.1199	483.89	968.016	40.84	238.321	688.956	-87.6975	205.912	734.664	185.736	280.153	752.111	184.08	256.974	762.039	261.793	274.663	729.693	361.506	724.908	678.694	-73.7588	752.981	738.198	192.123	683.224	757.655	187.95	704.767	759.625	277.189	689.478	730.823	370.943
32	0.31	474.688	1171.58	139.684	401.35	1169.18	90.8758	542.188	1181.67	89.0405	306.628	1039.85	-35.4758	653.948	1036.32	-46.1467	483.873	967.972	40.7303	238.326	688.9	-87.6736	205.896	734.641	185.656	280.154	752.092	184.023	256.966	762.016	261.659	274.639	729.669	361.45	724.883	678.572	-73.6049	753	738.203	192.117	683.216	757.626	187.842	704.784	759.597	277.104	689.498	730.798	370.87
33	0.32	474.703	1171.55	139.636	401.366	1169.18	90.859	542.276	1181.8	88.8377	306.615	1039.82	-35.4853	653.934	1036.28	-46.1676	483.879	967.944	40.6828	238.325	688.825	-87.6166	205.87	734.614	185.602	280.142	752.084	184.014	256.992	761.997	261.641	274.6	729.641	361.391	724.839	678.437	-73.4386	753.021	738.194	192.102	683.229	757.609	187.784	704.815	759.569	277.063	689.533	730.747	370.819
34	0.33	474.74	1171.53	139.752	401.419	1169.19	90.956	542.179	1181.29	89.3474	306.612	1039.8	-35.4435	653.94	1036.24	-46.1265	483.906	967.968	40.8142	238.326	688.766	-87.5692	205.875	734.613	185.673	280.152	752.091	184.064	257.017	762.005	261.727	274.596	729.642	361.426	724.801	678.327	-73.316	753.026	738.18	192.098	683.249	757.598	187.863	704.834	759.566	277.085	689.561	730.74	370.878
35	0.34	474.764	1171.53	139.845	401.428	1169.2	90.9944	542.13	1181.14	89.4699	306.601	1039.81	-35.4496	653.928	1036.24	-46.1265	483.902	967.966	40.8433	238.311	688.754	-87.5995	205.88	734.628	185.724	280.151	752.096	184.079	256.981	762.024	261.764	274.6	729.646	361.44	724.771	678.305	-73.3245	753.004	738.153	192.086	683.243	757.602	187.87	704.81	759.562	277.088	689.55	730.753	370.912
36	0.35	474.772	1171.56	139.791	401.4	1169.18	90.9207	542.101	1181.1	89.4608	306.585	1039.81	-35.4996	653.897	1036.24	-46.1775	483.856	967.931	40.7208	238.311	688.796	-87.6683	205.854	734.634	185.685	280.108	752.093	184.031	256.926	762.037	261.731	274.588	729.638	361.422	724.763	678.341	-73.4162	752.977	738.128	192.049	683.215	757.602	187.828	704.785	759.543	277.057	689.531	730.748	370.863
37	0.36	474.801	1171.58	139.817	401.418	1169.19	90.9424	542.166	1181.33	89.1642	306.604	1039.84	-35.4949	653.909	1036.25	-46.1858	483.85	967.934	40.7237	238.296	688.829	-87.689	205.877	734.647	185.718	280.109	752.111	184.025	256.918	762.09	261.785	274.611	729.668	361.489	724.769	678.408	-73.5324	752.962	738.119	192.015	683.203	757.62	187.862	704.781	759.547	277.031	689.528	730.757	370.869
38	0.37	474.866	1171.62	139.868	401.468	1169.23	91.0193	542.332	1181.96	88.5498	306.625	1039.87	-35.4882	653.935	1036.27	-46.1692	483.892	967.946	40.7575	238.266	688.871	-87.7066	205.926	734.674	185.756	280.164	752.139	184.1	256.967	762.131	261.852	274.655	729.702	361.542	724.749	678.546	-73.7352	752.96	738.135	191.981	683.223	757.678	187.905	704.803	759.582	277.028	689.548	730.799	370.909
39	0.38	474.885	1171.62	139.737	401.474	1169.24	90.9879	542.455	1182.28	88.3894	306.635	1039.88	-35.513	653.933	1036.3	-46.2032	483.898	967.913	40.6893	238.248	688.916	-87.7451	205.943	734.678	185.709	280.201	752.128	184.093	257.004	762.138	261.788	274.662	729.71	361.484	724.722	678.632	-73.8562	752.952	738.15	191.97	683.224	757.692	187.854	704.811	759.611	276.996	689.564	730.825	370.895
40	0.39	474.891	1171.6	139.732	401.465	1169.23	90.9324	542.381	1182.02	88.5439	306.629	1039.87	-35.5291	653.917	1036.29	-46.209	483.87	967.889	40.5976	238.258	688.933	-87.7579	205.917	734.679	185.641	280.192	752.125	184.027	257.001	762.139	261.719	274.648	729.704	361.43	724.714	678.599	-73.7762	752.959	738.171	191.998	683.211	757.674	187.811	704.799	759.622	276.996	689.552	730.821	370.879
41	0.4	474.902	1171.65	139.983	401.465	1169.24	90.9597	542.231	1181.37	89.2615	306.623	1039.86	-35.4719	653.911	1036.29	-46.174	483.852	967.921	40.7322	238.273	688.914	-87.7043	205.884	734.677	185.67	280.159	752.149	184.049	256.991	762.137	261.756	274.625	729.706	361.453	724.707	678.54	-73.6703	752.952	738.188	192.067	683.196	757.683	187.895	704.773	759.627	277.069	689.527	730.827	370.927
42	0.41	474.866	1171.69	140.088	401.45	1169.24	91.0537	542.172	1181.2	89.4841	306.607	1039.85	-35.4334	653.903	1036.28	-46.1197	483.829	967.942	40.8125	238.272	688.874	-87.6629	205.846	734.672	185.738	280.129	752.179	184.074	256.96	762.132	261.846	274.596	729.708	361.49	724.715	678.46	-73.5321	752.943	738.192	192.1	683.159	757.693	187.961	704.757	759.621	277.141	689.5	730.818	370.95
43	0.42	474.8	1171.6	139.812	401.419	1169.22	91.0165	542.246	1181.43	89.2567	306.588	1039.83	-35.4706	653.896	1036.25	-46.1459	483.816	967.904	40.7017	238.28	688.826	-87.6318	205.813	734.655	185.689	280.104	752.153	184.038	256.931	762.101	261.836	274.577	729.687	361.466	724.726	678.405	-73.4499	752.959	738.179	192.113	683.166	757.66	187.936	704.769	759.599	277.102	689.509	730.763	370.877
44	0.43	474.812	1171.56	139.661	401.426	1169.21	90.9432	542.364	1181.76	88.8778	306.609	1039.82	-35.4951	653.917	1036.25	-46.1862	483.839	967.87	40.6085	238.306	688.797	-87.5894	205.816	734.647	185.602	280.107	752.112	184.013	256.941	762.102	261.782	274.587	729.661	361.418	724.745	678.376	-73.4489	752.99	738.169	192.106	683.203	757.622	187.853	704.803	759.575	277.057	689.549	730.733	370.815
45	0.44	474.886	1171.53	139.751	401.475	1169.21	90.9881	542.274	1181.27	89.2823	306.645	1039.81	-35.5	653.933	1036.24	-46.1944	483.896	967.862	40.6185	238.308	688.798	-87.5995	205.866	734.636	185.646	280.16	752.1	184.062	256.992	762.114	261.817	274.622	729.645	361.437	724.762	678.365	-73.4548	753.022	738.148	192.055	683.255	757.606	187.802	704.847	759.566	277.043	689.587	730.726	370.844
46	0.45	474.936	1171.58	139.8	401.488	1169.2	90.9792	542.237	1181.13	89.3389	306.648	1039.8	-35.5233	653.94	1036.23	-46.2228	483.927	967.851	40.6133	238.291	688.809	-87.6171	205.891	734.628	185.692	280.172	752.082	184.063	257.003	762.085	261.82	274.64	729.639	361.455	724.766	678.387	-73.5323	753.006	738.125	191.989	683.256	757.596	187.769	704.851	759.551	277.008	689.584	730.724	370.838
47	0.46	474.891	1171.59	139.654	401.476	1169.19	90.9107	542.212	1181.08	89.3324	306.636	1039.8	-35.5435	653.938	1036.23	-46.2412	483.9	967.841	40.5534	238.284	688.834	-87.6667	205.899	734.641	185.688	280.154	752.081	184.035	256.992	762.051	261.764	274.658	729.66	361.473	724.761	678.418	-73.6055	752.992	738.122	192	683.245	757.612	187.809	704.828	759.551	277.004	689.571	730.748	370.826
48	0.47	474.885	1171.63	139.662	401.475	1169.21	90.891	542.185	1181.13	89.3291	306.634	1039.82	-35.5807	653.933	1036.25	-46.2382	483.889	967.868	40.577	238.282	688.858	-87.705	205.918	734.668	185.688	280.168	752.104	184.043	257.01	762.065	261.717	274.669	729.7	361.481	724.755	678.452	-73.6517	752.984	738.156	192.022	683.234	757.653	187.864	704.815	759.584	277.01	689.555	730.789	370.84
49	0.48	474.868	1171.69	139.804	401.461	1169.24	90.9086	542.147	1181.17	89.3284	306.622	1039.83	-35.5956	653.924	1036.27	-46.2366	483.872	967.907	40.6257	238.265	688.887	-87.7543	205.912	734.67	185.69	280.16	752.135	184.063	256.997	762.08	261.712	274.662	729.71	361.471	724.741	678.503	-73.6962	752.955	738.183	192.026	683.206	757.71	187.92	704.786	759.622	277.052	689.518	730.84	370.936
50	0.49	474.838	1171.71	139.806	401.441	1169.26	90.9052	542.125	1181.19	89.3608	306.611	1039.84	-35.5842	653.912	1036.27	-46.2253	483.861	967.919	40.6455	238.265	688.871	-87.7183	205.87	734.663	185.686	280.14	752.141	184.096	256.994	762.063	261.763	274.63	729.688	361.443	724.719	678.514	-73.6879	752.935	738.181	192.057	683.187	757.733	187.969	704.762	759.642	277.092	689.472	730.86	371.002
51	0.5	474.831	1171.68	139.659	401.459	1169.24	90.9065	542.141	1181.18	89.406	306.608	1039.82	-35.5761	653.897	1036.25	-46.2111	483.854	967.882	40.5896	238.272	688.841	-87.7051	205.848	734.65	185.693	280.153	752.134	184.086	257.008	762.067	261.778	274.623	729.67	361.445	724.716	678.47	-73.6006	752.956	738.181	192.078	683.196	757.721	187.926	704.783	759.642	277.102	689.479	730.849	370.973
52	0.51	474.879	1171.67	139.644	401.469	1169.23	90.8724	542.187	1181.17	89.3968	306.628	1039.81	-35.5829	653.912	1036.24	-46.1985	483.877	967.845	40.5316	238.308	688.804	-87.6745	205.859	734.64	185.664	280.186	752.122	184.07	257.011	762.09	261.73	274.629	729.669	361.433	724.733	678.415	-73.5036	752.991	738.17	192.088	683.226	757.686	187.86	704.826	759.618	277.091	689.516	730.802	370.921
53	0.52	474.917	1171.72	139.683	401.466	1169.22	90.8375	542.292	1181.46	89.1042	306.635	1039.81	-35.5936	653.922	1036.24	-46.2119	483.89	967.839	40.506	238.343	688.773	-87.6249	205.863	734.63	185.617	280.194	752.108	184.034	256.999	762.118	261.73	274.622	729.657	361.416	724.744	678.384	-73.4524	753.012	738.152	192.084	683.259	757.644	187.804	704.85	759.599	277.065	689.533	730.76	370.864
54	0.53	474.903	1171.68	139.655	401.445	1169.23	90.863	542.397	1181.81	88.8377	306.626	1039.8	-35.5971	653.918	1036.24	-46.2159	483.871	967.835	40.5111	238.36	688.743	-87.5775	205.872	734.64	185.639	280.179	752.116	184.052	256.981	762.104	261.781	274.62	729.656	361.429	724.766	678.374	-73.4662	753.008	738.138	192.096	683.251	757.619	187.825	704.838	759.595	277.076	689.534	730.738	370.838
55	0.54	474.871	1171.63	139.635	401.428	1169.23	90.8875	542.235	1181.29	89.2211	306.632	1039.8	-35.593	653.924	1036.24	-46.2066	483.841	967.854	40.5219	238.379	688.723	-87.5583	205.863	734.663	185.667	280.149	752.144	184.051	256.989	762.087	261.795	274.618	729.678	361.428	724.788	678.352	-73.4719	753	738.144	192.067	683.254	757.634	187.856	704.836	759.591	277.052	689.533	730.75	370.841
56	0.55	474.834	1171.67	139.668	401.402	1169.25	90.8517	542.188	1181.21	89.29	306.628	1039.81	-35.6246	653.926	1036.25	-46.2593	483.83	967.876	40.5241	238.395	688.741	-87.6074	205.86	734.692	185.661	280.148	752.151	184.032	256.961	762.084	261.717	274.609	729.701	361.406	724.809	678.386	-73.548	752.993	738.166	192.006	683.228	757.66	187.839	704.805	759.577	277.023	689.513	730.77	370.831
57	0.56	474.795	1171.69	139.686	401.379	1169.24	90.8421	542.124	1181.21	89.3202	306.615	1039.8	-35.6217	653.905	1036.26	-46.2767	483.806	967.87	40.5183	238.363	688.79	-87.6786	205.843	734.705	185.654	280.109	752.151	184.012	256.93	762.082	261.698	274.6	729.725	361.424	724.797	678.453	-73.6446	752.975	738.178	192.011	683.196	757.683	187.853	704.761	759.572	277.008	689.466	730.782	370.856
58	0.57	474.77	1171.69	139.774	401.39	1169.23	90.9021	542.068	1181.2	89.3528	306.602	1039.78	-35.5791	653.889	1036.26	-46.2447	483.812	967.879	40.5938	238.329	688.814	-87.7043	205.837	734.698	185.686	280.11	752.146	184.043	256.919	762.069	261.735	274.603	729.73	361.478	724.761	678.516	-73.7131	752.936	738.185	192.047	683.165	757.697	187.92	704.727	759.58	277.07	689.43	730.799	370.93
59	0.58	474.761	1171.63	139.618	401.408	1169.21	90.9256	542.058	1181.19	89.3655	306.6	1039.76	-35.569	653.887	1036.27	-46.2315	483.839	967.867	40.6249	238.314	688.799	-87.7105	205.851	734.662	185.716	280.128	752.111	184.081	256.938	762.048	261.779	274.613	729.687	361.484	724.72	678.548	-73.7501	752.934	738.167	192.026	683.178	757.679	187.938	704.731	759.566	277.078	689.446	730.815	370.967
60	0.59	474.803	1171.55	139.497	401.415	1169.18	90.8776	542.093	1181.17	89.3101	306.596	1039.74	-35.6018	653.887	1036.27	-46.2581	483.873	967.785	40.4471	238.287	688.793	-87.7169	205.871	734.615	185.666	280.165	752.059	184.012	256.95	762.052	261.699	274.621	729.64	361.416	724.691	678.511	-73.678	752.971	738.135	192.008	683.207	757.63	187.879	704.762	759.542	277.034	689.482	730.78	370.902
61	0.6	474.859	1171.53	139.485	401.432	1169.17	90.8383	542.126	1181.15	89.2909	306.619	1039.73	-35.5948	653.905	1036.26	-46.2755	483.913	967.75	40.3614	238.272	688.788	-87.7353	205.907	734.591	185.624	280.203	752.057	183.98	256.964	762.081	261.675	274.63	729.621	361.374	724.675	678.462	-73.575	753.009	738.118	192.01	683.249	757.595	187.813	704.813	759.548	277.021	689.52	730.756	370.873
62	0.61	474.933	1171.58	139.68	401.478	1169.19	90.9513	542.157	1181.14	89.3438	306.649	1039.76	-35.5499	653.938	1036.26	-46.2341	483.941	967.8	40.524	238.303	688.757	-87.6769	205.925	734.613	185.685	280.242	752.102	184.028	257.02	762.117	261.765	274.65	729.647	361.435	724.694	678.422	-73.4857	753.025	738.119	192.038	683.298	757.627	187.869	704.854	759.591	277.057	689.542	730.751	370.889
63	0.62	474.976	1171.7	139.936	401.484	1169.21	90.9981	542.229	1181.44	89.0951	306.664	1039.8	-35.5605	653.959	1036.28	-46.2082	483.934	967.869	40.6301	238.335	688.732	-87.6103	205.919	734.65	185.713	280.244	752.161	184.077	257.067	762.129	261.829	274.663	729.68	361.475	724.732	678.395	-73.4722	753.031	738.127	192.064	683.308	757.667	187.913	704.887	759.634	277.068	689.568	730.777	370.897
64	0.63	474.903	1171.73	139.885	401.442	1169.21	90.9675	542.296	1181.83	88.7502	306.659	1039.8	-35.5676	653.956	1036.3	-46.2201	483.887	967.881	40.5611	238.377	688.731	-87.6016	205.89	734.679	185.675	280.196	752.188	184.06	257.018	762.12	261.793	274.652	729.699	361.47	724.778	678.416	-73.5014	753.02	738.158	192.066	683.265	757.673	187.835	704.867	759.642	277.044	689.559	730.784	370.842
65	0.64	474.854	1171.68	139.869	401.425	1169.22	90.9754	542.18	1181.35	89.2992	306.664	1039.8	-35.5401	653.958	1036.3	-46.228	483.852	967.89	40.5858	238.416	688.739	-87.5817	205.881	734.701	185.676	280.168	752.194	184.084	256.98	762.11	261.726	274.638	729.717	361.473	724.826	678.432	-73.5182	753.009	738.181	192.084	683.235	757.696	187.863	704.844	759.636	277.053	689.513	730.795	370.859
66	0.65	474.842	1171.67	139.942	401.425	1169.21	91.0071	542.17	1181.22	89.4458	306.664	1039.78	-35.4976	653.958	1036.28	-46.1831	483.861	967.905	40.7148	238.421	688.752	-87.5878	205.894	734.703	185.733	280.155	752.169	184.093	257	762.085	261.745	274.639	729.734	361.512	724.846	678.438	-73.5566	752.996	738.185	192.087	683.216	757.685	187.922	704.825	759.608	277.074	689.497	730.802	370.925
67	0.66	474.791	1171.54	139.779	401.426	1169.19	91.0278	542.157	1181.17	89.4864	306.639	1039.76	-35.5057	653.942	1036.26	-46.1851	483.843	967.836	40.6076	238.387	688.777	-87.6498	205.874	734.677	185.724	280.123	752.122	184.031	256.984	762.034	261.723	274.626	729.694	361.488	724.823	678.456	-73.6131	752.985	738.184	192.065	683.201	757.647	187.913	704.797	759.572	277.046	689.505	730.779	370.898
68	0.67	474.805	1171.47	139.602	401.398	1169.14	90.9285	542.155	1181.12	89.4902	306.622	1039.74	-35.5286	653.913	1036.22	-46.2066	483.836	967.757	40.4533	238.338	688.778	-87.682	205.839	734.628	185.644	280.108	752.069	183.964	256.935	761.996	261.694	274.61	729.649	361.437	724.766	678.44	-73.613	752.985	738.16	192.059	683.203	757.611	187.874	704.769	759.531	276.998	689.5	730.746	370.857
69	0.68	474.874	1171.44	139.642	401.428	1169.12	90.9508	542.156	1181.07	89.4709	306.61	1039.72	-35.5428	653.902	1036.2	-46.2107	483.867	967.74	40.4427	238.314	688.757	-87.6686	205.844	734.599	185.632	280.141	752.052	184.004	256.935	762.041	261.724	274.598	729.616	361.422	724.715	678.42	-73.5858	752.992	738.123	192.034	683.237	757.591	187.869	704.767	759.518	277.015	689.503	730.737	370.85
70	0.69	474.911	1171.45	139.763	401.481	1169.11	91.054	542.139	1181.05	89.4467	306.613	1039.73	-35.5479	653.9	1036.2	-46.1986	483.885	967.757	40.5184	238.282	688.75	-87.6898	205.871	734.579	185.667	280.167	752.052	184.014	256.969	762.088	261.799	274.602	729.615	361.423	724.669	678.399	-73.5495	752.985	738.124	192.007	683.249	757.601	187.91	704.784	759.532	277.028	689.511	730.766	370.894
71	0.7	474.916	1171.44	139.804	401.465	1169.1	91.0415	542.123	1181.03	89.472	306.607	1039.75	-35.5537	653.895	1036.21	-46.1979	483.878	967.763	40.4891	238.276	688.743	-87.681	205.851	734.591	185.632	280.156	752.065	183.983	256.949	762.079	261.763	274.615	729.633	361.423	724.657	678.373	-73.4949	752.975	738.121	192.016	683.234	757.612	187.878	704.791	759.568	277.033	689.52	730.787	370.896
72	0.71	474.926	1171.48	139.888	401.459	1169.1	91.0188	542.143	1181.05	89.5249	306.621	1039.77	-35.551	653.918	1036.23	-46.2002	483.864	967.793	40.4836	238.325	688.746	-87.6669	205.832	734.627	185.604	280.134	752.098	183.978	256.954	762.099	261.718	274.628	729.656	361.429	724.699	678.382	-73.495	752.976	738.134	192.045	683.225	757.652	187.856	704.799	759.599	277.038	689.524	730.799	370.874
73	0.72	474.919	1171.56	139.977	401.487	1169.14	91.0632	542.182	1181.08	89.5455	306.672	1039.79	-35.537	653.959	1036.26	-46.1963	483.873	967.865	40.5877	238.388	688.758	-87.6541	205.86	734.675	185.651	280.144	752.172	184.06	256.979	762.127	261.73	274.648	729.706	361.458	724.772	678.401	-73.5487	752.979	738.166	192.062	683.232	757.682	187.884	704.819	759.626	277.054	689.521	730.813	370.859
74	0.73	474.9	1171.6	140.003	401.487	1169.18	91.1024	542.192	1181.11	89.5894	306.696	1039.81	-35.515	653.984	1036.27	-46.1752	483.871	967.91	40.6613	238.419	688.77	-87.6309	205.887	734.71	185.723	280.14	752.209	184.08	256.985	762.137	261.72	274.646	729.744	361.473	724.833	678.435	-73.6001	752.973	738.204	192.082	683.215	757.693	187.886	704.827	759.641	277.097	689.511	730.841	370.896
75	0.74	474.892	1171.56	140.035	401.481	1169.16	91.1315	542.193	1181.1	89.6602	306.698	1039.8	-35.4863	653.986	1036.27	-46.1482	483.862	967.899	40.698	238.444	688.777	-87.6016	205.881	734.707	185.728	280.128	752.19	184.061	256.966	762.092	261.759	274.637	729.739	361.489	724.84	678.42	-73.5587	752.979	738.202	192.116	683.19	757.672	187.875	704.81	759.617	277.109	689.5	730.822	370.924
76	0.75	474.909	1171.5	139.99	401.49	1169.13	91.1248	542.22	1181.07	89.6949	306.71	1039.78	-35.4665	653.995	1036.25	-46.1242	483.872	967.849	40.6365	238.442	688.747	-87.5603	205.889	734.678	185.73	280.142	752.14	184.07	256.969	762.048	261.817	274.646	729.706	361.513	724.841	678.4	-73.5178	753.008	738.173	192.131	683.226	757.629	187.867	704.824	759.58	277.087	689.526	730.784	370.913
77	0.76	474.973	1171.49	139.936	401.532	1169.11	91.1202	542.252	1181.04	89.6479	306.714	1039.76	-35.4986	654.01	1036.22	-46.1343	483.911	967.798	40.5592	238.399	688.721	-87.5773	205.904	734.637	185.688	280.175	752.117	184.047	256.987	762.043	261.8	274.667	729.671	361.493	724.802	678.372	-73.5179	753.031	738.142	192.085	683.266	757.593	187.819	704.847	759.562	277.033	689.56	730.751	370.863
78	0.77	475.009	1171.46	139.869	401.538	1169.11	91.0899	542.268	1181.02	89.5379	306.698	1039.75	-35.5271	654.018	1036.19	-46.1433	483.937	967.76	40.4999	238.352	688.738	-87.6399	205.923	734.598	185.664	280.209	752.077	184.039	257.016	762.038	261.776	274.665	729.629	361.454	724.736	678.346	-73.4997	753.03	738.125	192.029	683.277	757.58	187.813	704.845	759.54	276.994	689.57	730.723	370.84
79	0.78	475.01	1171.45	139.826	401.535	1169.1	91.0651	542.339	1181.32	89.203	306.671	1039.73	-35.5318	653.994	1036.18	-46.1561	483.958	967.744	40.5144	238.327	688.725	-87.668	205.916	734.574	185.662	280.22	752.056	184.023	257.035	762.025	261.774	274.646	729.596	361.424	724.69	678.273	-73.4089	753.021	738.116	192.011	683.272	757.591	187.832	704.846	759.516	276.998	689.581	730.721	370.849
80	0.79	474.966	1171.44	139.758	401.517	1169.11	91.0407	542.396	1181.72	88.8337	306.657	1039.73	-35.5238	653.952	1036.18	-46.1867	483.933	967.764	40.5303	238.303	688.744	-87.6801	205.875	734.594	185.641	280.175	752.066	183.991	257.003	762.02	261.74	274.631	729.602	361.428	724.675	678.258	-73.3832	752.998	738.122	191.981	683.24	757.62	187.841	704.807	759.516	277.008	689.555	730.752	370.839
81	0.8	474.88	1171.48	139.653	401.47	1169.12	91.0243	542.241	1181.25	89.3642	306.642	1039.75	-35.5402	653.925	1036.2	-46.1706	483.867	967.806	40.516	238.294	688.811	-87.7369	205.812	734.631	185.598	280.102	752.093	183.951	256.941	762.03	261.691	274.594	729.651	361.415	724.687	678.344	-73.5072	752.952	738.154	191.976	683.188	757.654	187.827	704.749	759.561	277.022	689.501	730.781	370.843
82	0.81	474.858	1171.56	139.796	401.454	1169.15	91.036	542.183	1181.15	89.5782	306.648	1039.79	-35.5293	653.936	1036.23	-46.1383	483.839	967.849	40.6163	238.34	688.845	-87.7303	205.823	734.647	185.668	280.09	752.131	184.005	256.925	762.05	261.727	274.591	729.704	361.447	724.741	678.432	-73.6098	752.921	738.177	192.032	683.152	757.673	187.857	704.726	759.6	277.05	689.459	730.798	370.88
83	0.82	474.903	1171.63	140.028	401.488	1169.16	91.0993	542.201	1181.11	89.6698	306.701	1039.81	-35.4788	653.978	1036.24	-46.1079	483.874	967.877	40.7329	238.406	688.808	-87.6364	205.879	734.658	185.756	280.125	752.151	184.087	256.975	762.093	261.855	274.631	729.736	361.511	724.817	678.443	-73.6028	752.944	738.183	192.086	683.174	757.673	187.932	704.776	759.619	277.118	689.476	730.801	370.915
84	0.83	474.985	1171.62	140.042	401.512	1169.16	91.1105	542.252	1181.1	89.6436	306.737	1039.8	-35.473	654.015	1036.24	-46.1253	483.898	967.847	40.643	238.441	688.774	-87.5821	205.896	734.66	185.746	280.151	752.13	184.038	256.98	762.103	261.836	274.658	729.719	361.51	724.875	678.449	-73.6201	752.992	738.18	192.078	683.232	757.656	187.904	704.825	759.618	277.104	689.54	730.785	370.868
85	0.84	475.009	1171.51	139.78	401.52	1169.15	91.0387	542.292	1181.09	89.5838	306.73	1039.78	-35.5142	654.016	1036.22	-46.1897	483.919	967.79	40.4637	238.43	688.753	-87.5909	205.884	734.635	185.636	280.172	752.099	183.986	256.983	762.097	261.722	274.654	729.675	361.449	724.864	678.423	-73.6022	753.022	738.182	192.061	683.248	757.611	187.79	704.842	759.605	277.011	689.582	730.751	370.787
86	0.85	475.029	1171.48	139.705	401.546	1169.13	91.0332	542.316	1181.08	89.5655	306.72	1039.75	-35.493	654.018	1036.2	-46.1826	483.927	967.769	40.4354	238.428	688.718	-87.5519	205.876	734.616	185.62	280.188	752.072	183.998	256.982	762.09	261.699	274.637	729.641	361.439	724.825	678.339	-73.4614	753.041	738.157	192.073	683.264	757.584	187.789	704.854	759.588	277.006	689.601	730.736	370.775
87	0.86	475.051	1171.54	139.888	401.56	1169.13	91.0863	542.302	1181.08	89.5559	306.704	1039.75	-35.4715	653.999	1036.19	-46.1356	483.935	967.794	40.5726	238.409	688.701	-87.5444	205.873	734.62	185.671	280.205	752.08	184.079	256.992	762.079	261.781	274.633	729.648	361.489	724.776	678.258	-73.3415	753.022	738.138	192.068	683.268	757.598	187.867	704.84	759.585	277.067	689.608	730.742	370.818
88	0.87	474.997	1171.54	139.828	401.531	1169.15	91.0642	542.254	1181.09	89.5381	306.669	1039.75	-35.4967	653.952	1036.18	-46.1582	483.895	967.814	40.5739	238.355	688.712	-87.6034	205.852	734.631	185.668	280.16	752.106	184.067	256.972	762.048	261.78	274.606	729.659	361.481	724.701	678.236	-73.3373	752.986	738.15	192.041	683.232	757.626	187.856	704.803	759.584	277.042	689.588	730.755	370.825
89	0.88	474.983	1171.57	139.85	401.498	1169.16	91.0253	542.228	1181.11	89.523	306.66	1039.75	-35.5345	653.921	1036.19	-46.2121	483.859	967.815	40.5031	238.344	688.726	-87.6541	205.815	734.64	185.595	280.115	752.126	183.997	256.945	762.043	261.718	274.585	729.661	361.416	724.665	678.289	-73.4215	752.975	738.164	192.022	683.201	757.659	187.833	704.773	759.584	276.982	689.553	730.795	370.842
90	0.89	475.009	1171.6	139.925	401.527	1169.17	91.0581	542.227	1181.13	89.5242	306.688	1039.77	-35.5055	653.933	1036.21	-46.2213	483.873	967.853	40.5896	238.364	688.756	-87.6838	205.849	734.664	185.617	280.125	752.153	184.021	256.988	762.07	261.754	274.605	729.685	361.424	724.674	678.36	-73.5409	752.957	738.19	192.027	683.198	757.691	187.908	704.784	759.61	277.02	689.531	730.838	370.922
91	0.9	475.045	1171.67	140.037	401.576	1169.18	91.1436	542.282	1181.46	89.2316	306.703	1039.79	-35.4604	653.966	1036.24	-46.1935	483.914	967.878	40.7144	238.362	688.792	-87.6954	205.905	734.677	185.728	280.164	752.159	184.108	257.019	762.077	261.787	274.641	729.703	361.494	724.696	678.443	-73.6568	752.946	738.2	192.047	683.205	757.709	188.001	704.802	759.64	277.089	689.545	730.855	370.979
92	0.91	475.052	1171.63	139.942	401.567	1169.16	91.1236	542.395	1181.85	88.8326	306.704	1039.79	-35.4781	653.992	1036.23	-46.175	483.917	967.833	40.6107	238.387	688.816	-87.6704	205.92	734.656	185.747	280.159	752.125	184.065	256.99	762.05	261.762	274.661	729.701	361.514	724.734	678.511	-73.7312	752.973	738.186	192.058	683.215	757.673	187.939	704.811	759.629	277.072	689.573	730.806	370.893
93	0.92	475.05	1171.53	139.745	401.546	1169.14	91.0208	542.325	1181.3	89.3563	306.713	1039.76	-35.5193	654.022	1036.21	-46.1855	483.924	967.768	40.4894	238.436	688.788	-87.6195	205.921	734.623	185.693	280.168	752.081	184.008	256.951	762.037	261.688	274.665	729.671	361.489	724.78	678.492	-73.7107	753.019	738.146	192.083	683.237	757.597	187.876	704.833	759.576	277.026	689.604	730.749	370.827
94	0.93	475.051	1171.5	139.687	401.551	1169.13	90.9991	542.308	1181.15	89.4937	306.729	1039.74	-35.5084	654.034	1036.21	-46.1802	483.955	967.767	40.5754	238.461	688.751	-87.6013	205.947	734.605	185.719	280.186	752.063	184.042	256.988	762.049	261.744	274.679	729.64	361.493	724.784	678.427	-73.6326	753.045	738.111	192.089	683.268	757.568	187.878	704.862	759.551	277.043	689.635	730.723	370.827
95	0.94	475.06	1171.55	139.748	401.562	1169.14	91.0409	542.281	1181.12	89.5212	306.716	1039.73	-35.5007	654.003	1036.2	-46.1816	483.972	967.808	40.6399	238.444	688.697	-87.5789	205.957	734.594	185.719	280.201	752.082	184.096	257	762.056	261.775	274.668	729.619	361.473	724.751	678.373	-73.5485	753.037	738.128	192.061	683.271	757.578	187.85	704.873	759.563	277.071	689.644	730.722	370.841
96	0.95	475.032	1171.58	139.783	401.52	1169.16	90.9927	542.258	1181.12	89.4956	306.694	1039.73	-35.535	653.967	1036.2	-46.2072	483.92	967.811	40.5142	238.417	688.632	-87.5562	205.896	734.607	185.629	280.177	752.094	184.05	256.981	762.064	261.741	274.625	729.618	361.406	724.722	678.282	-73.4155	753.022	738.138	192.056	683.264	757.596	187.781	704.863	759.575	277.037	689.641	730.723	370.812
97	0.96	474.991	1171.68	139.826	401.48	1169.18	90.9392	542.226	1181.15	89.4842	306.677	1039.74	-35.5536	653.949	1036.21	-46.2303	483.877	967.858	40.5034	238.411	688.616	-87.5586	205.838	734.647	185.584	280.141	752.119	184.016	256.962	762.079	261.676	274.588	729.66	361.377	724.705	678.213	-73.3221	753.002	738.15	192.031	683.25	757.631	187.784	704.842	759.573	276.994	689.626	730.745	370.794
98	0.97	474.961	1171.76	139.958	401.453	1169.2	90.9385	542.161	1181.19	89.4908	306.654	1039.77	-35.5471	653.926	1036.23	-46.2449	483.85	967.915	40.573	238.396	688.677	-87.6228	205.811	734.687	185.609	280.111	752.173	184.054	256.949	762.109	261.683	274.567	729.695	361.364	724.682	678.241	-73.3626	752.952	738.184	191.997	683.207	757.675	187.866	704.797	759.601	277.001	689.583	730.805	370.852
99	0.98	474.909	1171.73	139.999	401.433	1169.21	90.957	542.109	1181.19	89.4853	306.638	1039.78	-35.543	653.914	1036.23	-46.2346	483.821	967.924	40.6044	238.379	688.745	-87.6834	205.813	734.687	185.681	280.083	752.169	184.085	256.94	762.093	261.756	274.568	729.725	361.403	724.703	678.338	-73.4962	752.914	738.184	192.02	683.161	757.692	187.936	704.748	759.615	277.05	689.541	730.826	370.892
100	0.99	474.925	1171.7	139.948	401.434	1169.2	90.9666	542.104	1181.18	89.5211	306.658	1039.78	-35.5502	653.94	1036.23	-46.2136	483.828	967.879	40.5485	238.383	688.779	-87.6886	205.845	734.677	185.707	280.086	752.142	184.03	256.912	762.062	261.766	274.602	729.7	361.451	724.757	678.453	-73.6603	752.92	738.169	192.053	683.171	757.696	187.958	704.743	759.607	277.075	689.53	730.826	370.922
101	1	474.989	1171.68	139.864	401.454	1169.18	90.9035	542.145	1181.21	89.4687	306.685	1039.78	-35.5808	653.973	1036.23	-46.2254	483.869	967.831	40.4497	238.406	688.809	-87.7031	205.888	734.646	185.688	280.121	752.102	183.976	256.931	762.069	261.761	274.655	729.681	361.454	724.804	678.561	-73.8136	752.957	738.169	192.034	683.203	757.673	187.906	704.762	759.6	277.072	689.547	730.826	370.916
102	1.01	474.99	1171.64	139.696	401.466	1169.17	90.8576	542.181	1181.21	89.3998	306.691	1039.77	-35.5986	653.982	1036.21	-46.2292	483.895	967.798	40.3966	238.41	688.835	-87.7197	205.925	734.621	185.677	280.164	752.083	183.994	256.973	762.073	261.747	274.672	729.682	361.449	724.792	678.595	-73.8469	752.974	738.161	192.023	683.225	757.647	187.871	704.79	759.595	277.047	689.559	730.812	370.875
103	1.02	474.995	1171.59	139.612	401.486	1169.15	90.8864	542.21	1181.18	89.4234	306.691	1039.75	-35.563	653.986	1036.19	-46.1982	483.91	967.771	40.4086	238.404	688.805	-87.6894	205.937	734.596	185.702	280.201	752.068	184.041	256.981	762.046	261.756	274.666	729.645	361.47	724.765	678.5	-73.6865	752.994	738.136	192.044	683.246	757.61	187.874	704.816	759.573	277.05	689.584	730.769	370.845
104	1.03	474.979	1171.57	139.6	401.491	1169.16	90.8918	542.238	1181.16	89.4519	306.697	1039.74	-35.5507	653.974	1036.17	-46.1715	483.92	967.771	40.4698	238.407	688.734	-87.611	205.916	734.594	185.696	280.199	752.052	184.031	256.979	762.03	261.757	274.651	729.632	361.472	724.758	678.348	-73.4578	753.023	738.133	192.061	683.273	757.6	187.899	704.834	759.565	277.045	689.611	730.741	370.829
105	1.04	474.933	1171.57	139.577	401.486	1169.19	90.8812	542.233	1181.17	89.4392	306.678	1039.73	-35.6027	653.944	1036.15	-46.209	483.883	967.806	40.4509	238.402	688.684	-87.5934	205.882	734.606	185.663	280.144	752.054	183.973	256.97	762.052	261.709	274.623	729.622	361.393	724.726	678.257	-73.3543	753.028	738.159	192.063	683.262	757.602	187.845	704.806	759.553	277.025	689.601	730.741	370.793
106	1.05	474.894	1171.57	139.607	401.456	1169.21	90.8606	542.207	1181.18	89.4307	306.647	1039.74	-35.6226	653.92	1036.15	-46.2361	483.83	967.813	40.4083	238.406	688.651	-87.5953	205.819	734.607	185.589	280.102	752.074	183.981	256.952	762.039	261.68	274.587	729.629	361.364	724.699	678.214	-73.3264	753.005	738.168	192.073	683.208	757.605	187.811	704.777	759.547	277.026	689.563	730.737	370.812
107	1.06	474.932	1171.64	139.842	401.455	1169.21	90.9018	542.196	1181.17	89.4462	306.648	1039.74	-35.5998	653.919	1036.14	-46.2085	483.819	967.831	40.4779	238.414	688.635	-87.5755	205.816	734.625	185.636	280.115	752.103	184.076	256.965	762.042	261.773	274.587	729.656	361.437	724.71	678.199	-73.3355	752.995	738.152	192.075	683.201	757.611	187.856	704.789	759.55	277.026	689.544	730.749	370.87
108	1.07	474.971	1171.71	139.92	401.473	1169.23	90.9211	542.2	1181.17	89.4366	306.682	1039.77	-35.5947	653.945	1036.18	-46.2137	483.851	967.869	40.5536	238.416	688.683	-87.583	205.875	734.65	185.702	280.166	752.135	184.139	257	762.053	261.811	274.63	729.68	361.498	724.718	678.281	-73.4221	752.986	738.144	192.067	683.216	757.614	187.891	704.812	759.567	277.052	689.545	730.779	370.915
109	1.08	474.994	1171.7	139.741	401.489	1169.24	90.8538	542.21	1181.19	89.3485	306.689	1039.8	-35.6244	653.974	1036.22	-46.2431	483.867	967.866	40.4589	238.407	688.772	-87.6338	205.919	734.654	185.697	280.191	752.134	184.083	257.015	762.086	261.758	274.677	729.705	361.5	724.717	678.428	-73.6298	752.983	738.152	192.052	683.243	757.651	187.893	704.826	759.59	277.066	689.547	730.782	370.868
110	1.09	475.006	1171.69	139.594	401.487	1169.23	90.8205	542.213	1181.19	89.3115	306.698	1039.81	-35.6253	653.994	1036.24	-46.2509	483.873	967.841	40.3877	238.391	688.828	-87.6891	205.921	734.656	185.68	280.198	752.125	184.041	257.018	762.106	261.748	274.694	729.709	361.506	724.728	678.526	-73.7809	752.979	738.15	192.05	683.243	757.663	187.907	704.836	759.597	277.046	689.539	730.79	370.872
111	1.1	475.023	1171.71	139.666	401.505	1169.23	90.8858	542.203	1181.2	89.2957	306.705	1039.8	-35.5943	653.997	1036.23	-46.2118	483.885	967.871	40.5064	238.387	688.813	-87.6874	205.924	734.651	185.726	280.187	752.116	184.053	257.019	762.102	261.814	274.696	729.692	361.502	724.727	678.526	-73.7572	752.979	738.143	192.069	683.25	757.663	187.951	704.839	759.608	277.075	689.522	730.807	370.934
112	1.11	475.022	1171.71	139.742	401.494	1169.23	90.9027	542.186	1181.22	89.2984	306.677	1039.78	-35.6085	653.965	1036.2	-46.2238	483.872	967.876	40.533	238.372	688.783	-87.6685	205.912	734.626	185.742	280.17	752.11	184.086	256.971	762.082	261.82	274.659	729.657	361.447	724.709	678.472	-73.6782	752.981	738.152	192.042	683.228	757.639	187.938	704.807	759.61	277.079	689.496	730.811	370.958
113	1.12	474.953	1171.66	139.558	401.432	1169.22	90.7724	542.175	1181.24	89.2851	306.617	1039.74	-35.6513	653.917	1036.19	-46.2765	483.827	967.828	40.3713	238.356	688.751	-87.6778	205.849	734.59	185.639	280.096	752.073	183.992	256.896	762.046	261.695	274.585	729.63	361.353	724.673	678.409	-73.6004	752.97	738.172	192.014	683.182	757.616	187.843	704.766	759.563	277.036	689.437	730.782	370.877
114	1.13	474.939	1171.69	139.557	401.415	1169.22	90.7199	542.178	1181.26	89.2936	306.584	1039.72	-35.6311	653.893	1036.18	-46.2831	483.806	967.821	40.3194	238.345	688.713	-87.6426	205.799	734.594	185.572	280.06	752.061	183.937	256.886	762.023	261.598	274.549	729.627	361.318	724.641	678.335	-73.4794	752.97	738.177	192.008	683.165	757.604	187.817	704.744	759.542	277.018	689.399	730.771	370.816
115	1.14	474.925	1171.72	139.579	401.459	1169.23	90.8145	542.176	1181.26	89.3351	306.601	1039.72	-35.5826	653.906	1036.19	-46.2473	483.825	967.869	40.4595	238.345	688.662	-87.5802	205.822	734.621	185.648	280.077	752.095	184.012	256.927	762.048	261.679	274.556	729.649	361.365	724.635	678.267	-73.353	752.971	738.168	192.04	683.192	757.615	187.874	704.765	759.554	277.054	689.403	730.778	370.853
116	1.15	474.933	1171.75	139.683	401.469	1169.24	90.8754	542.183	1181.25	89.3162	306.627	1039.71	-35.5519	653.927	1036.19	-46.2324	483.838	967.884	40.5264	238.37	688.621	-87.5494	205.849	734.633	185.716	280.095	752.105	184.068	256.945	762.075	261.732	274.573	729.658	361.397	724.66	678.257	-73.3768	752.983	738.157	192.033	683.215	757.598	187.86	704.787	759.556	277.057	689.393	730.772	370.894
117	1.16	474.964	1171.74	139.791	401.431	1169.24	90.8249	542.204	1181.21	89.3444	306.653	1039.7	-35.5451	653.943	1036.18	-46.2297	483.83	967.84	40.4252	238.417	688.602	-87.5387	205.844	734.622	185.689	280.113	752.104	184.05	256.916	762.043	261.713	274.591	729.649	361.39	724.71	678.272	-73.4464	752.994	738.121	192.034	683.225	757.57	187.799	704.795	759.538	277.01	689.392	730.737	370.871
118	1.17	474.995	1171.72	139.764	401.449	1169.23	90.8479	542.205	1181.18	89.3607	306.686	1039.71	-35.5338	653.973	1036.18	-46.2147	483.847	967.791	40.4065	238.454	688.625	-87.5573	205.88	734.621	185.678	280.139	752.074	184.021	256.953	762.042	261.781	274.635	729.638	361.438	724.752	678.313	-73.5132	753.013	738.084	192.038	683.251	757.564	187.839	704.816	759.531	277.032	689.415	730.738	370.874
119	1.18	475.043	1171.73	139.899	401.493	1169.22	90.8944	542.212	1181.18	89.3809	306.713	1039.71	-35.5068	654.001	1036.18	-46.1519	483.919	967.798	40.514	238.449	688.682	-87.5906	205.945	734.609	185.749	280.199	752.063	184.074	257.015	762.065	261.833	274.678	729.656	361.501	724.754	678.38	-73.6017	753.02	738.095	192.047	683.283	757.588	187.871	704.842	759.552	277.057	689.441	730.754	370.912
120	1.19	475.042	1171.7	139.826	401.511	1169.22	90.9059	542.229	1181.18	89.4079	306.704	1039.71	-35.5044	654.007	1036.19	-46.1433	483.95	967.775	40.5284	238.439	688.716	-87.6206	205.965	734.601	185.745	280.204	752.063	184.064	257.051	762.042	261.773	274.689	729.661	361.497	724.741	678.428	-73.6556	753.033	738.119	192.025	683.283	757.594	187.864	704.844	759.56	277.038	689.441	730.764	370.912
121	1.2	475.039	1171.64	139.693	401.47	1169.22	90.8411	542.234	1181.2	89.409	306.678	1039.7	-35.5298	653.998	1036.19	-46.152	483.913	967.744	40.3988	238.436	688.718	-87.6486	205.929	734.619	185.632	280.186	752.08	183.99	257.039	762.029	261.69	274.659	729.656	361.445	724.719	678.447	-73.6689	753.029	738.149	192.014	683.243	757.605	187.829	704.826	759.559	277	689.418	730.782	370.878
122	1.21	474.989	1171.68	139.826	401.442	1169.22	90.8812	542.181	1181.23	89.4734	306.641	1039.71	-35.5214	653.955	1036.2	-46.1436	483.867	967.772	40.4837	238.417	688.715	-87.6638	205.876	734.633	185.636	280.159	752.122	184.008	256.994	762.048	261.655	274.615	729.657	361.395	724.686	678.451	-73.6308	752.987	738.191	192.026	683.206	757.646	187.883	704.788	759.588	277.039	689.393	730.845	370.942
123	1.22	474.93	1171.75	140.083	401.44	1169.21	90.9989	542.117	1181.23	89.6218	306.623	1039.72	-35.4843	653.908	1036.19	-46.0992	483.844	967.819	40.6649	238.4	688.72	-87.6649	205.831	734.631	185.694	280.13	752.151	184.075	256.959	762.058	261.749	274.584	729.672	361.41	724.666	678.411	-73.5602	752.942	738.196	192.083	683.165	757.692	187.967	704.752	759.626	277.117	689.369	730.873	371.012
124	1.23	474.937	1171.69	140.146	401.443	1169.2	91.0648	542.127	1181.2	89.7081	306.629	1039.71	-35.4782	653.906	1036.18	-46.0596	483.841	967.812	40.6964	238.418	688.694	-87.6196	205.825	734.617	185.702	280.122	752.143	184.078	256.938	762.062	261.835	274.593	729.67	361.462	724.683	678.366	-73.4885	752.952	738.175	192.134	683.168	757.669	187.962	704.75	759.623	277.11	689.393	730.835	370.984
125	1.24	474.974	1171.63	139.993	401.476	1169.17	91.0626	542.191	1181.16	89.6582	306.668	1039.71	-35.4749	653.958	1036.18	-46.0608	483.878	967.781	40.6031	238.439	688.656	-87.5692	205.857	734.61	185.662	280.147	752.109	184.026	256.949	762.077	261.808	274.602	729.65	361.441	724.726	678.339	-73.4424	753.001	738.147	192.098	683.212	757.609	187.896	704.796	759.599	277.049	689.467	730.777	370.885
126	1.25	475.041	1171.56	139.826	401.522	1169.15	91.0541	542.259	1181.12	89.5583	306.7	1039.69	-35.4847	654.022	1036.17	-46.0763	483.94	967.748	40.5477	238.468	688.634	-87.5566	205.912	734.6	185.654	280.205	752.095	184.044	256.987	762.092	261.734	274.631	729.649	361.43	724.76	678.316	-73.4448	753.039	738.119	192.028	683.26	757.551	187.798	704.856	759.564	276.999	689.523	730.735	370.825
127	1.26	475.065	1171.5	139.739	401.549	1169.14	91.0782	542.288	1181.08	89.5449	306.709	1039.67	-35.4794	654.049	1036.14	-46.0857	483.958	967.698	40.4879	238.496	688.624	-87.5658	205.946	734.58	185.67	280.218	752.084	184.032	256.999	762.078	261.696	274.654	729.649	361.45	724.787	678.301	-73.4657	753.047	738.08	191.986	683.261	757.516	187.769	704.877	759.531	276.979	689.539	730.696	370.791
128	1.27	475.058	1171.5	139.813	401.535	1169.12	91.0874	542.277	1181.06	89.579	306.712	1039.67	-35.4883	654.045	1036.14	-46.1029	483.928	967.694	40.4699	238.506	688.608	-87.5529	205.924	734.593	185.666	280.178	752.09	184.009	256.966	762.054	261.685	274.643	729.638	361.432	724.791	678.267	-73.449	753.031	738.086	191.981	683.246	757.539	187.805	704.843	759.528	276.978	689.536	730.702	370.777
129	1.28	475.024	1171.56	139.918	401.5	1169.16	91.067	542.241	1181.09	89.6141	306.688	1039.69	-35.4945	654.02	1036.16	-46.12	483.889	967.753	40.5121	238.498	688.617	-87.5699	205.869	734.633	185.641	280.131	752.11	183.993	256.925	762.047	261.714	274.617	729.664	361.413	724.761	678.278	-73.4917	752.989	738.138	191.975	683.204	757.594	187.825	704.801	759.556	276.985	689.503	730.765	370.816
130	1.29	474.993	1171.63	140.051	401.482	1169.19	91.0353	542.199	1181.13	89.6255	306.664	1039.71	-35.5037	653.983	1036.17	-46.12	483.855	967.809	40.5847	238.47	688.651	-87.6212	205.833	734.672	185.647	280.087	752.14	184.019	256.912	762.059	261.698	274.584	729.699	361.422	724.722	678.323	-73.5752	752.944	738.183	191.996	683.146	757.657	187.831	704.756	759.598	276.999	689.447	730.837	370.862
131	1.3	474.967	1171.64	140.087	401.488	1169.2	91.0516	542.207	1181.15	89.6331	306.657	1039.73	-35.501	653.968	1036.18	-46.1217	483.83	967.828	40.644	238.435	688.674	-87.6354	205.815	734.683	185.661	280.06	752.167	184.027	256.93	762.07	261.725	274.566	729.713	361.434	724.689	678.347	-73.5945	752.92	738.205	192.032	683.126	757.699	187.877	704.743	759.633	277.026	689.414	730.862	370.916
132	1.31	475.044	1171.69	140.093	401.522	1169.19	91.0613	542.243	1181.14	89.5967	306.671	1039.71	-35.4737	653.998	1036.17	-46.0961	483.871	967.803	40.6642	238.406	688.681	-87.6085	205.858	734.649	185.713	280.096	752.134	184.029	256.951	762.085	261.774	274.604	729.709	361.452	724.664	678.335	-73.5423	752.931	738.191	192.073	683.173	757.708	187.939	704.772	759.626	277.067	689.444	730.849	370.939
133	1.32	475.117	1171.61	139.901	401.6	1169.18	91.0639	542.325	1181.13	89.5508	306.693	1039.69	-35.4743	654.035	1036.15	-46.0955	483.94	967.744	40.6057	238.388	688.686	-87.6243	205.901	734.604	185.7	280.168	752.081	184.017	256.993	762.076	261.768	274.651	729.656	361.472	724.649	678.328	-73.5216	752.987	738.152	192.051	683.224	757.661	187.891	704.818	759.613	277.041	689.498	730.805	370.915
134	1.33	475.18	1171.55	139.742	401.645	1169.15	91.0102	542.4	1181.11	89.4919	306.72	1039.68	-35.5042	654.064	1036.12	-46.137	483.987	967.686	40.5251	238.4	688.672	-87.6271	205.926	734.565	185.635	280.212	752.046	183.985	256.989	762.063	261.709	274.666	729.601	361.449	724.651	678.327	-73.5337	753.022	738.125	192.049	683.243	757.579	187.781	704.855	759.586	276.998	689.531	730.742	370.887
135	1.34	475.219	1171.55	139.701	401.662	1169.14	90.9817	542.445	1181.1	89.4972	306.745	1039.67	-35.5059	654.092	1036.09	-46.137	483.99	967.641	40.4235	238.42	688.655	-87.6037	205.937	734.544	185.625	280.231	752.037	183.982	257.007	762.041	261.689	274.667	729.588	361.445	724.665	678.276	-73.4643	753.032	738.095	192.093	683.265	757.539	187.778	704.88	759.554	277.021	689.549	730.703	370.854
136	1.35	475.205	1171.59	139.689	401.679	1169.19	91.0281	542.45	1181.12	89.5059	306.744	1039.67	-35.4711	654.092	1036.09	-46.1211	483.979	967.666	40.4338	238.424	688.634	-87.5619	205.931	734.584	185.664	280.222	752.054	184.028	257.02	762.049	261.764	274.662	729.625	361.486	724.669	678.206	-73.3824	753.035	738.1	192.085	683.281	757.546	187.817	704.886	759.546	277.027	689.546	730.696	370.839
137	1.36	475.174	1171.66	139.79	401.661	1169.24	91.0138	542.428	1181.16	89.4763	306.73	1039.69	-35.5003	654.065	1036.12	-46.1477	483.931	967.734	40.4959	238.447	688.61	-87.5558	205.889	734.639	185.684	280.167	752.086	184.027	256.991	762.065	261.758	274.621	729.675	361.473	724.675	678.173	-73.3727	753.007	738.127	192.017	683.243	757.589	187.801	704.856	759.549	276.966	689.505	730.737	370.851
138	1.37	475.094	1171.71	139.795	401.607	1169.29	90.9536	542.383	1181.21	89.4573	306.703	1039.7	-35.5458	654.028	1036.13	-46.1855	483.853	967.784	40.4796	238.48	688.617	-87.5705	205.837	734.675	185.665	280.102	752.137	184.004	256.936	762.075	261.702	274.578	729.714	361.432	724.683	678.172	-73.413	752.965	738.159	191.99	683.165	757.624	187.779	704.799	759.551	276.954	689.446	730.77	370.867
139	1.38	475.04	1171.76	139.795	401.596	1169.32	90.9364	542.355	1181.26	89.4646	306.689	1039.72	-35.5545	654.016	1036.15	-46.2029	483.827	967.824	40.5468	238.477	688.635	-87.6002	205.823	734.695	185.676	280.08	752.167	184.02	256.926	762.084	261.749	274.576	729.735	361.448	724.684	678.208	-73.4673	752.942	738.175	192.01	683.15	757.654	187.826	704.761	759.563	277.022	689.418	730.801	370.911
140	1.39	475.114	1171.82	139.899	401.617	1169.33	90.9389	542.341	1181.27	89.3825	306.698	1039.73	-35.5489	654.02	1036.14	-46.2054	483.859	967.839	40.598	238.447	688.665	-87.6149	205.858	734.69	185.724	280.103	752.164	184.044	256.94	762.09	261.814	274.603	729.725	361.474	724.666	678.247	-73.5245	752.948	738.171	192.042	683.177	757.67	187.9	704.77	759.578	277.066	689.425	730.818	370.935
141	1.4	475.176	1171.81	139.725	401.619	1169.32	90.844	542.382	1181.26	89.2947	306.702	1039.74	-35.5982	654.041	1036.14	-46.2336	483.903	967.788	40.4313	238.428	688.709	-87.617	205.89	734.655	185.695	280.13	752.121	183.961	256.95	762.089	261.766	274.622	729.693	361.449	724.663	678.303	-73.5687	752.99	738.156	192.032	683.209	757.654	187.892	704.807	759.581	277.048	689.447	730.807	370.946
142	1.41	475.216	1171.78	139.599	401.639	1169.3	90.7528	542.419	1181.26	89.2202	306.703	1039.74	-35.6232	654.062	1036.13	-46.2658	483.952	967.721	40.2158	238.416	688.749	-87.646	205.916	734.608	185.636	280.161	752.068	183.91	256.971	762.087	261.693	274.635	729.668	361.41	724.657	678.344	-73.5859	753.014	738.132	192.043	683.246	757.63	187.827	704.835	759.57	277.018	689.461	730.795	370.949
143	1.42	475.225	1171.82	139.595	401.676	1169.33	90.7575	542.423	1181.29	89.2005	306.719	1039.76	-35.6176	654.076	1036.15	-46.2574	483.977	967.719	40.2204	238.404	688.762	-87.647	205.933	734.606	185.651	280.208	752.087	183.974	257.011	762.113	261.74	274.647	729.656	361.444	724.632	678.346	-73.5591	753.008	738.141	192.057	683.266	757.634	187.863	704.857	759.604	277.061	689.461	730.802	370.965
144	1.43	475.21	1171.93	139.719	401.649	1169.36	90.7575	542.406	1181.33	89.2249	306.711	1039.76	-35.617	654.076	1036.14	-46.2215	483.951	967.783	40.3533	238.429	688.727	-87.6185	205.905	734.624	185.666	280.206	752.123	184.044	257.025	762.106	261.79	274.638	729.659	361.468	724.635	678.3	-73.5187	752.99	738.161	192.049	683.252	757.655	187.919	704.848	759.627	277.09	689.448	730.808	370.963
145	1.44	475.13	1171.97	139.607	401.587	1169.4	90.7001	542.367	1181.35	89.2068	306.688	1039.74	-35.6459	654.035	1036.14	-46.2544	483.87	967.815	40.3662	238.469	688.659	-87.5915	205.838	734.642	185.617	280.141	752.124	184.029	256.943	762.067	261.741	274.59	729.669	361.414	724.654	678.235	-73.4806	752.971	738.176	192.028	683.206	757.663	187.914	704.802	759.612	277.043	689.41	730.797	370.908
146	1.45	475.061	1172.03	139.523	401.547	1169.43	90.6162	542.326	1181.37	89.1735	306.672	1039.73	-35.694	654.003	1036.13	-46.3036	483.797	967.828	40.3066	238.489	688.615	-87.581	205.787	734.655	185.582	280.082	752.128	184	256.878	762.059	261.689	274.554	729.687	361.382	724.67	678.194	-73.4653	752.957	738.178	192.02	683.165	757.65	187.831	704.764	759.582	277.002	689.376	730.775	370.841
147	1.46	475.067	1172.08	139.608	401.55	1169.44	90.6218	542.322	1181.38	89.1512	306.683	1039.73	-35.6905	654.008	1036.13	-46.2994	483.822	967.854	40.4278	238.5	688.613	-87.569	205.812	734.676	185.668	280.085	752.141	184.044	256.892	762.071	261.725	274.565	729.709	361.442	724.681	678.187	-73.457	752.954	738.16	192.006	683.18	757.65	187.854	704.773	759.566	277	689.396	730.768	370.84
148	1.47	475.115	1172.05	139.631	401.575	1169.42	90.6293	542.367	1181.34	89.1138	306.709	1039.72	-35.6982	654.04	1036.11	-46.2757	483.863	967.835	40.4177	238.508	688.595	-87.5328	205.862	734.659	185.689	280.114	752.125	184.053	256.945	762.045	261.769	274.612	729.69	361.506	724.689	678.186	-73.4734	752.984	738.116	192.006	683.223	757.638	187.851	704.82	759.554	276.999	689.46	730.729	370.815
149	1.48	475.163	1171.94	139.372	401.605	1169.4	90.5839	542.414	1181.32	89.0071	306.729	1039.71	-35.7454	654.07	1036.09	-46.3049	483.913	967.756	40.1944	238.505	688.598	-87.5379	205.913	734.607	185.647	280.17	752.051	184	256.969	762.016	261.713	274.658	729.651	361.48	724.69	678.213	-73.4747	753.032	738.081	192.005	683.292	757.623	187.771	704.872	759.535	276.963	689.539	730.691	370.78
150	1.49	475.175	1171.9	139.246	401.638	1169.41	90.5621	542.427	1181.33	88.9216	306.738	1039.71	-35.7817	654.089	1036.1	-46.3419	483.957	967.721	40.0918	238.488	688.632	-87.5819	205.963	734.588	185.637	280.224	752.038	183.97	256.997	762.048	261.674	274.681	729.628	361.429	724.683	678.255	-73.5102	753.073	738.076	191.983	683.34	757.6	187.724	704.917	759.545	276.943	689.601	730.709	370.771
151	1.5	475.175	1171.98	139.398	401.633	1169.43	90.5938	542.39	1181.37	88.9458	306.733	1039.72	-35.7632	654.081	1036.12	-46.3278	483.964	967.765	40.2009	238.474	688.656	-87.6176	205.977	734.598	185.681	280.252	752.081	184.033	257.018	762.075	261.737	274.679	729.635	361.467	724.665	678.288	-73.5353	753.057	738.091	191.997	683.321	757.631	187.836	704.921	759.581	277.018	689.615	730.746	370.829
152	1.51	475.134	1172.05	139.461	401.582	1169.45	90.578	542.335	1181.41	89.0117	306.697	1039.73	-35.7613	654.039	1036.14	-46.2947	483.921	967.809	40.3043	238.465	688.654	-87.6115	205.915	734.615	185.707	280.218	752.103	184.065	257.006	762.062	261.8	274.637	729.646	361.463	724.642	678.308	-73.5327	753.011	738.121	192.059	683.263	757.671	187.904	704.875	759.608	277.085	689.582	730.778	370.891
153	1.52	475.074	1172.1	139.438	401.526	1169.46	90.5293	542.278	1181.46	89.0787	306.658	1039.73	-35.7733	653.997	1036.17	-46.296	483.863	967.849	40.3286	238.437	688.654	-87.6077	205.856	734.656	185.679	280.169	752.135	184.07	256.952	762.062	261.776	274.59	729.674	361.459	724.646	678.315	-73.5018	752.974	738.178	192.082	683.203	757.701	187.905	704.827	759.629	277.069	689.547	730.811	370.892
154	1.53	475.023	1172.17	139.467	401.495	1169.48	90.5246	542.243	1181.49	89.071	306.645	1039.73	-35.7736	653.989	1036.2	-46.3172	483.823	967.903	40.3665	238.447	688.669	-87.6456	205.825	734.691	185.656	280.137	752.159	184.064	256.933	762.078	261.721	274.571	729.711	361.449	724.668	678.326	-73.5034	752.961	738.21	192.069	683.188	757.735	187.935	704.81	759.646	277.036	689.522	730.846	370.896
155	1.54	475.011	1172.21	139.54	401.47	1169.47	90.5183	542.228	1181.49	89.0652	306.65	1039.72	-35.7681	653.994	1036.21	-46.3324	483.801	967.915	40.3599	238.474	688.648	-87.6342	205.817	734.698	185.63	280.111	752.172	184.023	256.94	762.098	261.684	274.582	729.721	361.44	724.705	678.312	-73.5043	752.971	738.206	192.044	683.191	757.725	187.923	704.807	759.632	277.028	689.505	730.853	370.891
156	1.55	474.999	1172.11	139.478	401.457	1169.46	90.5086	542.219	1181.44	89.0586	306.664	1039.71	-35.7709	653.997	1036.21	-46.3423	483.807	967.892	40.3245	238.501	688.606	-87.5944	205.831	734.673	185.643	280.097	752.148	183.995	256.927	762.112	261.739	274.611	729.704	361.468	724.732	678.305	-73.5041	752.98	738.158	192.021	683.216	757.683	187.848	704.814	759.602	277.031	689.529	730.797	370.861
157	1.56	475.023	1172.05	139.404	401.476	1169.44	90.5207	542.249	1181.4	89.023	306.689	1039.69	-35.7553	654.02	1036.2	-46.3539	483.841	967.853	40.2435	238.527	688.549	-87.5382	205.867	734.65	185.677	280.145	752.117	183.997	256.934	762.122	261.781	274.634	729.685	361.468	724.75	678.289	-73.4957	753.013	738.108	191.993	683.248	757.645	187.812	704.854	759.584	277.008	689.584	730.747	370.808
158	1.57	475.045	1171.99	139.372	401.502	1169.44	90.5503	542.268	1181.36	88.9995	306.707	1039.69	-35.7574	654.04	1036.2	-46.355	483.882	967.83	40.1831	238.549	688.529	-87.5239	205.905	734.631	185.677	280.204	752.097	184.04	256.959	762.141	261.762	274.651	729.683	361.462	724.76	678.281	-73.4933	753.037	738.075	191.953	683.295	757.608	187.76	704.888	759.566	276.976	689.625	730.714	370.771
159	1.58	475.019	1171.91	139.246	401.499	1169.43	90.5646	542.252	1181.35	89.0508	306.697	1039.68	-35.7571	654.036	1036.18	-46.3345	483.879	967.784	40.118	238.555	688.54	-87.5277	205.922	734.61	185.663	280.222	752.075	184.022	256.972	762.116	261.73	274.652	729.66	361.437	724.737	678.283	-73.4913	753.039	738.071	191.97	683.294	757.57	187.759	704.887	759.553	276.985	689.629	730.707	370.771
160	1.59	474.993	1171.9	139.319	401.472	1169.4	90.5616	542.231	1181.38	89.1009	306.669	1039.66	-35.7443	654.013	1036.17	-46.3129	483.864	967.768	40.1425	238.536	688.565	-87.5303	205.916	734.613	185.663	280.2	752.074	184.027	256.977	762.056	261.732	274.638	729.637	361.449	724.707	678.301	-73.5109	753.014	738.11	192.002	683.245	757.572	187.813	704.855	759.558	276.995	689.599	730.718	370.785
161	1.6	474.905	1171.88	139.237	401.437	1169.38	90.5727	542.193	1181.43	89.0975	306.625	1039.66	-35.7385	653.97	1036.17	-46.2983	483.844	967.822	40.2614	238.512	688.584	-87.5531	205.879	734.631	185.637	280.158	752.082	184.041	256.958	762.008	261.685	274.606	729.642	361.438	724.675	678.32	-73.5122	752.971	738.169	192.004	683.203	757.62	187.849	704.81	759.566	277.006	689.538	730.762	370.809
162	1.61	474.859	1171.9	139.281	401.411	1169.38	90.5515	542.165	1181.46	89.1428	306.585	1039.66	-35.7636	653.93	1036.17	-46.3124	483.786	967.843	40.2839	238.489	688.601	-87.5905	205.827	734.639	185.581	280.118	752.084	184.018	256.936	761.978	261.617	274.559	729.65	361.395	724.676	678.339	-73.5221	752.948	738.21	192.037	683.146	757.642	187.865	704.769	759.574	277.009	689.478	730.801	370.848
163	1.62	474.855	1171.91	139.376	401.398	1169.35	90.5901	542.148	1181.43	89.2041	306.582	1039.67	-35.7526	653.91	1036.16	-46.2862	483.757	967.833	40.2994	238.479	688.613	-87.6034	205.804	734.652	185.571	280.088	752.084	184.013	256.92	761.989	261.617	274.552	729.655	361.398	724.663	678.346	-73.5096	752.928	738.202	192.086	683.13	757.653	187.883	704.743	759.585	277.053	689.45	730.804	370.881
164	1.63	474.914	1171.91	139.558	401.423	1169.35	90.6793	542.159	1181.37	89.2313	306.618	1039.69	-35.7142	653.936	1036.18	-46.2276	483.791	967.842	40.3816	238.47	688.622	-87.5769	205.85	734.648	185.661	280.138	752.119	184.071	256.966	762.028	261.728	274.597	729.662	361.456	724.659	678.36	-73.5084	752.943	738.172	192.089	683.167	757.674	187.939	704.788	759.611	277.099	689.478	730.817	370.936
165	1.64	475.02	1171.9	139.661	401.483	1169.33	90.769	542.201	1181.29	89.2732	306.675	1039.71	-35.6907	653.993	1036.19	-46.2171	483.864	967.838	40.4377	238.489	688.624	-87.5768	205.923	734.639	185.729	280.206	752.127	184.102	257.024	762.073	261.852	274.667	729.681	361.503	724.686	678.353	-73.5002	752.989	738.135	192.08	683.239	757.657	187.944	704.861	759.636	277.093	689.546	730.788	370.915
166	1.65	475.088	1171.82	139.626	401.513	1169.29	90.7421	542.271	1181.23	89.2597	306.718	1039.7	-35.6966	654.056	1036.18	-46.2462	483.912	967.812	40.3291	238.525	688.596	-87.5642	205.974	734.614	185.683	280.245	752.105	184.048	257.035	762.097	261.79	274.708	729.681	361.49	724.728	678.33	-73.5081	753.048	738.1	192.074	683.29	757.604	187.815	704.913	759.614	277.023	689.61	730.738	370.838
167	1.66	475.105	1171.78	139.553	401.524	1169.27	90.7418	542.301	1181.18	89.2322	306.731	1039.68	-35.6863	654.083	1036.17	-46.2424	483.921	967.77	40.2201	238.538	688.578	-87.5464	205.987	734.595	185.673	280.257	752.079	184.022	257.055	762.105	261.739	274.72	729.678	361.486	724.747	678.321	-73.5378	753.075	738.078	192.043	683.324	757.564	187.752	704.924	759.572	276.975	689.635	730.707	370.815
168	1.67	475.094	1171.81	139.712	401.51	1169.28	90.7946	542.277	1181.18	89.2167	306.717	1039.66	-35.6725	654.059	1036.17	-46.2234	483.896	967.794	40.3209	238.505	688.565	-87.5416	205.96	734.607	185.688	280.237	752.099	184.074	257.04	762.107	261.78	274.691	729.685	361.505	724.737	678.288	-73.5219	753.034	738.096	192.032	683.311	757.582	187.789	704.897	759.566	276.999	689.607	730.716	370.827
169	1.68	474.973	1171.76	139.664	401.452	1169.28	90.7695	542.233	1181.22	89.269	306.667	1039.65	-35.658	653.998	1036.16	-46.2247	483.815	967.825	40.386	238.468	688.554	-87.5515	205.882	734.63	185.654	280.163	752.105	184.071	256.947	762.051	261.758	274.632	729.683	361.472	724.706	678.239	-73.4585	752.988	738.132	192.011	683.245	757.605	187.824	704.833	759.547	277.016	689.523	730.741	370.852
170	1.69	474.854	1171.78	139.69	401.386	1169.3	90.7377	542.163	1181.26	89.3532	306.601	1039.65	-35.6737	653.936	1036.15	-46.2366	483.731	967.841	40.3485	238.448	688.565	-87.5844	205.794	734.644	185.616	280.069	752.106	184.016	256.851	762.043	261.697	274.563	729.687	361.412	724.669	678.227	-73.425	752.94	738.166	192.014	683.161	757.631	187.836	704.752	759.535	276.997	689.437	730.753	370.862
171	1.7	474.831	1171.85	139.834	401.384	1169.31	90.7722	542.129	1181.28	89.3922	306.573	1039.67	-35.6598	653.909	1036.16	-46.2051	483.714	967.873	40.446	238.417	688.596	-87.6034	205.766	734.662	185.655	280.049	752.126	184.029	256.841	762.068	261.716	274.537	729.7	361.406	724.649	678.246	-73.4118	752.923	738.188	192.033	683.122	757.653	187.9	704.714	759.561	277.058	689.409	730.795	370.915
172	1.71	474.904	1171.81	139.905	401.417	1169.31	90.8304	542.138	1181.27	89.4106	306.59	1039.69	-35.6249	653.932	1036.16	-46.1499	483.755	967.849	40.4749	238.401	688.652	-87.6104	205.808	734.662	185.7	280.079	752.119	184.025	256.899	762.076	261.787	274.564	729.688	361.453	724.657	678.299	-73.4687	752.928	738.182	192.032	683.157	757.646	187.937	704.742	759.578	277.115	689.441	730.815	370.975
173	1.72	474.984	1171.74	139.717	401.448	1169.28	90.7992	542.194	1181.26	89.4273	306.627	1039.68	-35.6279	653.971	1036.15	-46.1611	483.815	967.77	40.3249	238.408	688.691	-87.6299	205.86	734.623	185.656	280.126	752.073	184.014	256.93	762.054	261.748	274.598	729.652	361.449	724.683	678.364	-73.5435	752.963	738.157	192.027	683.195	757.619	187.919	704.777	759.575	277.069	689.482	730.791	370.968
174	1.73	475.033	1171.67	139.48	401.469	1169.28	90.738	542.246	1181.27	89.4155	306.656	1039.68	-35.6494	654.018	1036.15	-46.1763	483.875	967.721	40.2516	238.425	688.706	-87.6536	205.922	734.591	185.602	280.177	752.029	183.955	256.96	762.039	261.668	274.64	729.618	361.413	724.706	678.416	-73.5842	753.006	738.134	192.039	683.23	757.591	187.859	704.811	759.563	277.023	689.516	730.764	370.891
175	1.74	475.066	1171.68	139.518	401.49	1169.28	90.7736	542.27	1181.26	89.4107	306.667	1039.68	-35.6397	654.036	1036.16	-46.1352	483.883	967.723	40.2541	238.454	688.72	-87.6475	205.943	734.609	185.629	280.208	752.047	183.977	257.008	762.071	261.722	274.669	729.631	361.462	724.728	678.43	-73.6182	753.02	738.127	192.047	683.261	757.6	187.832	704.846	759.582	277.029	689.532	730.773	370.888
176	1.75	475.026	1171.75	139.663	401.48	1169.3	90.8243	542.263	1181.24	89.4583	306.67	1039.7	-35.5964	654.018	1036.18	-46.1057	483.847	967.796	40.3733	238.452	688.687	-87.5777	205.928	734.632	185.689	280.205	752.094	184.083	257.024	762.083	261.848	274.65	729.666	361.501	724.735	678.376	-73.5658	752.996	738.135	192.063	683.254	757.631	187.891	704.843	759.598	277.061	689.512	730.79	370.927
177	1.76	474.978	1171.81	139.832	401.466	1169.3	90.8182	542.224	1181.24	89.4836	306.65	1039.71	-35.5958	653.985	1036.17	-46.1174	483.791	967.858	40.4056	238.447	688.63	-87.5309	205.885	734.661	185.703	280.156	752.141	184.093	256.988	762.07	261.817	274.622	729.706	361.48	724.735	678.314	-73.4936	752.968	738.164	192.049	683.222	757.66	187.868	704.812	759.602	277.048	689.498	730.811	370.907
178	1.77	474.976	1171.89	139.975	401.439	1169.31	90.8119	542.21	1181.26	89.4676	306.643	1039.72	-35.6225	653.965	1036.17	-46.1727	483.756	967.914	40.4311	238.453	688.58	-87.5403	205.841	734.688	185.635	280.129	752.176	184.043	256.982	762.084	261.738	274.6	729.727	361.426	724.727	678.244	-73.4076	752.962	738.177	192.025	683.211	757.692	187.849	704.8	759.594	277.013	689.497	730.816	370.876
179	1.78	475.01	1171.92	139.903	401.449	1169.32	90.85	542.227	1181.26	89.4303	306.65	1039.71	-35.6256	653.961	1036.17	-46.1873	483.788	967.933	40.4885	238.438	688.568	-87.5644	205.855	734.693	185.627	280.137	752.184	184.04	257.003	762.088	261.729	274.606	729.72	361.401	724.713	678.201	-73.3877	752.975	738.172	192.004	683.223	757.695	187.871	704.813	759.592	276.988	689.5	730.809	370.872
180	1.79	475.032	1171.84	139.795	401.467	1169.3	90.8867	542.253	1181.22	89.3986	306.66	1039.68	-35.596	653.974	1036.16	-46.1603	483.818	967.881	40.455	238.417	688.567	-87.55	205.897	734.66	185.709	280.174	752.137	184.089	257.01	762.06	261.745	274.624	729.688	361.415	724.702	678.203	-73.4094	752.991	738.141	192.027	683.255	757.647	187.857	704.824	759.565	277.007	689.507	730.776	370.882
181	1.8	475.052	1171.73	139.693	401.48	1169.23	90.8665	542.274	1181.19	89.3901	306.657	1039.66	-35.5988	653.983	1036.13	-46.1335	483.834	967.789	40.3402	238.393	688.608	-87.5634	205.928	734.588	185.733	280.198	752.043	184.052	256.999	762.02	261.751	274.634	729.63	361.439	724.701	678.271	-73.4737	753.006	738.092	192.076	683.274	757.589	187.814	704.822	759.523	277.02	689.519	730.726	370.894
182	1.81	475.074	1171.66	139.612	401.498	1169.2	90.8237	542.265	1181.18	89.3399	306.649	1039.65	-35.6177	653.99	1036.12	-46.1479	483.833	967.733	40.2521	238.386	688.679	-87.6027	205.934	734.562	185.685	280.212	751.99	184.022	256.97	762.017	261.701	274.64	729.591	361.432	724.706	678.348	-73.5267	753.017	738.078	192.093	683.266	757.557	187.797	704.82	759.507	276.996	689.505	730.7	370.871
183	1.82	475.073	1171.63	139.618	401.491	1169.2	90.8136	542.256	1181.2	89.3167	306.655	1039.66	-35.6079	653.993	1036.15	-46.1555	483.828	967.737	40.2372	238.369	688.704	-87.6158	205.928	734.584	185.657	280.192	751.988	184.003	256.966	762.026	261.725	274.654	729.6	361.453	724.715	678.41	-73.5802	753.011	738.099	192.083	683.254	757.557	187.818	704.803	759.507	277.016	689.488	730.716	370.875
184	1.83	475.063	1171.68	139.711	401.482	1169.23	90.8756	542.222	1181.24	89.3249	306.642	1039.67	-35.5958	653.984	1036.18	-46.1516	483.814	967.797	40.3278	238.359	688.717	-87.6266	205.918	734.61	185.692	280.143	752.029	184.004	256.963	762.037	261.794	274.651	729.622	361.488	724.723	678.444	-73.6384	752.996	738.145	192.044	683.241	757.608	187.874	704.782	759.548	277.061	689.467	730.762	370.931
185	1.84	474.983	1171.76	139.825	401.455	1169.27	90.8551	542.194	1181.29	89.3224	306.627	1039.68	-35.6057	653.974	1036.2	-46.1587	483.796	967.884	40.4284	238.368	688.688	-87.6077	205.886	734.646	185.698	280.106	752.099	184.039	256.951	762.044	261.81	274.621	729.654	361.489	724.734	678.412	-73.6059	752.959	738.188	192.058	683.21	757.652	187.895	704.77	759.593	277.075	689.427	730.798	370.945
186	1.85	474.914	1171.83	139.811	401.413	1169.3	90.7793	542.172	1181.32	89.3261	306.618	1039.69	-35.6258	653.955	1036.22	-46.1859	483.742	967.933	40.4191	238.373	688.668	-87.5864	205.85	734.681	185.665	280.067	752.13	184.01	256.929	762.044	261.768	274.581	729.686	361.438	724.722	678.355	-73.5102	752.945	738.215	192.042	683.182	757.673	187.914	704.76	759.601	277.07	689.4	730.816	370.942
187	1.86	474.895	1171.83	139.757	401.386	1169.32	90.7318	542.145	1181.31	89.308	306.603	1039.7	-35.6673	653.943	1036.23	-46.2037	483.723	967.945	40.4252	238.37	688.662	-87.5773	205.822	734.692	185.643	280.067	752.141	184.003	256.905	762.056	261.706	274.566	729.697	361.411	724.713	678.324	-73.4456	752.94	738.211	192.037	683.159	757.668	187.867	704.743	759.588	277.058	689.378	730.803	370.891
188	1.87	474.927	1171.84	139.798	401.401	1169.32	90.7444	542.147	1181.29	89.2809	306.61	1039.71	-35.6721	653.952	1036.22	-46.1986	483.761	967.956	40.4546	238.362	688.638	-87.5406	205.83	734.687	185.663	280.109	752.161	184.059	256.933	762.082	261.751	274.587	729.693	361.44	724.709	678.3	-73.4262	752.957	738.173	192.035	683.177	757.65	187.864	704.767	759.58	277.046	689.398	730.789	370.865
189	1.88	474.983	1171.78	139.617	401.451	1169.33	90.75	542.183	1181.24	89.2318	306.651	1039.72	-35.6535	653.988	1036.23	-46.1854	483.812	967.943	40.42	238.368	688.614	-87.4996	205.893	734.659	185.71	280.183	752.147	184.099	256.995	762.103	261.84	274.635	729.674	361.461	724.728	678.277	-73.3925	753.002	738.11	192.04	683.252	757.628	187.861	704.811	759.568	277.039	689.463	730.758	370.862
190	1.89	475.035	1171.77	139.453	401.477	1169.31	90.6701	542.221	1181.23	89.1991	306.667	1039.71	-35.6878	654.021	1036.23	-46.2067	483.831	967.873	40.2672	238.361	688.64	-87.5444	205.948	734.615	185.711	280.234	752.103	184.092	257.012	762.112	261.806	274.679	729.658	361.45	724.739	678.311	-73.4363	753.036	738.086	192.04	683.297	757.589	187.817	704.849	759.568	276.998	689.519	730.732	370.831
191	1.9	475.024	1171.77	139.454	401.475	1169.3	90.6196	542.222	1181.24	89.1382	306.663	1039.71	-35.7279	654.019	1036.23	-46.2121	483.832	967.851	40.1958	238.334	688.679	-87.5706	205.946	734.605	185.653	280.208	752.074	184.027	257.009	762.107	261.773	274.691	729.644	361.438	724.747	678.368	-73.512	753.035	738.074	192.03	683.298	757.581	187.772	704.836	759.553	277.002	689.513	730.721	370.82
192	1.91	475.011	1171.8	139.584	401.472	1169.32	90.6701	542.201	1181.27	89.1727	306.658	1039.72	-35.7063	654.003	1036.25	-46.1681	483.824	967.881	40.2933	238.325	688.712	-87.5609	205.931	734.635	185.706	280.187	752.063	184.048	257.013	762.086	261.841	274.681	729.641	361.493	724.759	678.423	-73.5463	753.01	738.096	192.06	683.285	757.611	187.865	704.818	759.556	277.064	689.48	730.742	370.908
193	1.92	474.994	1171.84	139.659	401.453	1169.33	90.6719	542.162	1181.33	89.1905	306.641	1039.72	-35.6856	653.97	1036.25	-46.1474	483.799	967.916	40.3766	238.311	688.738	-87.579	205.918	734.654	185.746	280.174	752.072	184.094	257.022	762.021	261.863	274.657	729.635	361.511	724.754	678.439	-73.5369	752.993	738.144	192.091	683.247	757.65	187.98	704.782	759.562	277.104	689.442	730.782	370.986
194	1.93	474.931	1171.87	139.51	401.419	1169.33	90.5692	542.15	1181.38	89.1193	306.607	1039.71	-35.7364	653.946	1036.25	-46.2004	483.751	967.921	40.2809	238.288	688.763	-87.656	205.87	734.654	185.662	280.131	752.067	184.037	256.972	761.974	261.722	274.631	729.633	361.463	724.748	678.46	-73.5577	752.97	738.194	192.076	683.187	757.656	187.948	704.74	759.542	277.084	689.392	730.786	370.971
195	1.94	474.871	1171.88	139.348	401.405	1169.33	90.5179	542.149	1181.41	89.0898	306.589	1039.71	-35.7872	653.94	1036.25	-46.2234	483.719	967.936	40.2266	238.284	688.755	-87.673	205.834	734.645	185.607	280.095	752.057	183.99	256.931	761.97	261.626	274.609	729.632	361.427	724.764	678.448	-73.528	752.968	738.21	192.072	683.164	757.648	187.892	704.729	759.532	277.057	689.367	730.791	370.937
196	1.95	474.901	1171.92	139.418	401.414	1169.35	90.5457	542.151	1181.41	89.0768	306.607	1039.71	-35.7781	653.951	1036.25	-46.1982	483.747	967.956	40.3276	238.297	688.722	-87.6209	205.851	734.636	185.642	280.109	752.07	184.019	256.958	761.988	261.709	274.619	729.634	361.465	724.777	678.441	-73.5215	752.984	738.188	192.096	683.187	757.636	187.935	704.74	759.544	277.085	689.397	730.785	370.955
197	1.96	474.948	1171.96	139.44	401.43	1169.37	90.5414	542.157	1181.38	89.0416	306.633	1039.72	-35.7677	653.984	1036.26	-46.179	483.793	967.978	40.3813	238.297	688.71	-87.5913	205.89	734.632	185.702	280.157	752.097	184.047	256.993	762.025	261.788	274.649	729.649	361.505	724.805	678.417	-73.4812	752.995	738.146	192.121	683.23	757.621	187.931	704.763	759.553	277.099	689.438	730.76	370.947
198	1.97	474.946	1171.97	139.362	401.433	1169.38	90.4816	542.173	1181.37	89.0042	306.645	1039.73	-35.8023	654.005	1036.27	-46.1799	483.792	967.95	40.2415	238.314	688.694	-87.5691	205.897	734.63	185.695	280.163	752.091	184.025	256.969	762.056	261.732	274.669	729.639	361.492	724.84	678.386	-73.4371	753.027	738.106	192.09	683.266	757.606	187.869	704.799	759.542	277.049	689.462	730.722	370.882
199	1.98	474.927	1171.98	139.242	401.412	1169.39	90.4102	542.171	1181.35	88.9285	306.651	1039.75	-35.8307	654.012	1036.28	-46.2167	483.79	967.965	40.2019	238.303	688.695	-87.5671	205.902	734.629	185.681	280.144	752.092	184.005	256.95	762.111	261.74	274.657	729.652	361.472	724.848	678.387	-73.4462	753.035	738.088	192.059	683.286	757.612	187.813	704.807	759.533	277.024	689.462	730.71	370.852
200	1.99	474.9	1172.03	139.354	401.396	1169.4	90.4116	542.129	1181.35	88.8808	306.644	1039.77	-35.8174	653.998	1036.29	-46.2221	483.789	968.03	40.3167	238.29	688.699	-87.5764	205.91	734.636	185.717	280.14	752.11	184.028	256.962	762.143	261.834	274.65	729.662	361.469	724.842	678.393	-73.4491	753.003	738.098	192.064	683.275	757.627	187.857	704.79	759.556	277.093	689.458	730.738	370.904
201	2	474.855	1172.03	139.365	401.37	1169.41	90.3954	542.073	1181.38	88.8702	306.628	1039.77	-35.8301	653.978	1036.29	-46.2219	483.753	968.074	40.3927	238.282	688.688	-87.577	205.872	734.644	185.717	280.153	752.127	184.083	256.958	762.111	261.867	274.633	729.664	361.45	724.828	678.379	-73.4214	752.99	738.101	192.068	683.266	757.642	187.907	704.763	759.56	277.112	689.422	730.773	370.975
202	2.01	474.808	1172.03	139.248	401.356	1169.42	90.3586	542.045	1181.42	88.8492	306.587	1039.77	-35.894	653.965	1036.31	-46.2505	483.701	968.065	40.2603	238.264	688.694	-87.5973	205.824	734.653	185.64	280.107	752.118	184.033	256.955	762.074	261.798	274.612	729.667	361.42	724.805	678.385	-73.4308	752.967	738.128	192.039	683.234	757.666	187.886	704.741	759.544	277.043	689.39	730.801	370.958
203	2.02	474.793	1172.04	139.172	401.337	1169.42	90.2939	542.035	1181.44	88.7907	306.571	1039.77	-35.9273	653.95	1036.34	-46.2885	483.714	968.078	40.2344	238.247	688.733	-87.6435	205.829	734.661	185.628	280.094	752.117	184.017	256.979	762.068	261.726	274.615	729.673	361.433	724.779	678.446	-73.4921	752.956	738.164	192.016	683.216	757.681	187.89	704.731	759.546	277.007	689.382	730.813	370.952
204	2.03	474.803	1172.04	139.244	401.344	1169.41	90.3091	542.035	1181.47	88.7776	306.577	1039.78	-35.9228	653.967	1036.37	-46.2593	483.73	968.096	40.2999	238.236	688.772	-87.6615	205.871	734.674	185.693	280.126	752.111	184.056	257	762.067	261.727	274.641	729.681	361.494	724.778	678.498	-73.5276	752.967	738.19	192.032	683.217	757.689	187.912	704.74	759.55	277.019	689.389	730.825	370.967
205	2.04	474.779	1171.98	139.187	401.337	1169.4	90.3179	542.024	1181.45	88.7944	306.585	1039.76	-35.918	653.981	1036.39	-46.2512	483.736	968.084	40.3521	238.252	688.793	-87.6446	205.897	734.654	185.727	280.138	752.085	184.05	257.021	762.03	261.78	274.661	729.653	361.536	724.801	678.529	-73.5177	752.979	738.185	192.067	683.227	757.662	187.92	704.745	759.535	277.061	689.402	730.804	370.986
206	2.05	474.776	1171.95	139.123	401.297	1169.36	90.2796	542.022	1181.44	88.8451	306.598	1039.75	-35.8883	653.992	1036.38	-46.2464	483.737	968.045	40.2742	238.257	688.799	-87.6175	205.912	734.615	185.714	280.12	752.054	183.988	256.99	762.013	261.798	274.651	729.621	361.511	724.843	678.582	-73.5711	752.997	738.169	192.11	683.227	757.619	187.875	704.748	759.534	277.084	689.412	730.767	370.975
207	2.06	474.773	1171.9	139.025	401.283	1169.34	90.3012	542.03	1181.44	88.8473	306.614	1039.74	-35.8645	654.006	1036.39	-46.2395	483.735	968.027	40.2488	238.248	688.778	-87.5958	205.912	734.595	185.733	280.141	752.028	183.994	256.957	762.028	261.768	274.667	729.6	361.515	724.888	678.63	-73.6225	753.02	738.156	192.127	683.245	757.586	187.873	704.769	759.531	277.09	689.433	730.735	370.967
208	2.07	474.771	1171.96	139.078	401.279	1169.34	90.3342	542.026	1181.44	88.8174	306.622	1039.74	-35.8407	654.014	1036.41	-46.1955	483.753	968.051	40.289	238.239	688.755	-87.5459	205.925	734.6	185.725	280.17	752.038	184.041	257.01	762.066	261.816	274.674	729.623	361.522	724.895	678.598	-73.5325	753.042	738.135	192.141	683.274	757.576	187.878	704.789	759.538	277.107	689.463	730.727	370.951
209	2.08	474.751	1171.98	139.115	401.275	1169.34	90.3528	542.01	1181.44	88.8351	306.625	1039.75	-35.836	654.016	1036.42	-46.1708	483.77	968.076	40.3321	238.234	688.717	-87.5241	205.952	734.607	185.756	280.205	752.071	184.079	257.053	762.06	261.837	274.683	729.644	361.557	724.889	678.544	-73.4345	753.045	738.118	192.152	683.284	757.595	187.863	704.818	759.546	277.101	689.502	730.743	370.943
210	2.09	474.721	1171.99	139.147	401.27	1169.34	90.3355	541.989	1181.45	88.8127	306.617	1039.76	-35.8363	654.009	1036.43	-46.1674	483.772	968.112	40.4078	238.225	688.684	-87.5306	205.95	734.615	185.74	280.215	752.1	184.093	257.072	762.056	261.823	274.676	729.642	361.519	724.882	678.502	-73.3752	753.042	738.122	192.132	683.295	757.624	187.917	704.836	759.556	277.066	689.514	730.739	370.926
211	2.1	474.68	1172.05	139.164	401.227	1169.34	90.2895	541.936	1181.47	88.7833	306.585	1039.77	-35.8581	653.99	1036.44	-46.1857	483.749	968.159	40.4629	238.204	688.694	-87.5614	205.921	734.648	185.701	280.164	752.106	184.064	257.051	762.085	261.773	274.65	729.65	361.454	724.86	678.487	-73.3735	753.021	738.146	192.048	683.28	757.668	187.901	704.81	759.566	277.027	689.498	730.742	370.889
212	2.11	474.628	1172.09	139.193	401.173	1169.35	90.2755	541.88	1181.47	88.8091	306.545	1039.78	-35.8518	653.961	1036.45	-46.1869	483.714	968.182	40.5083	238.182	688.715	-87.5675	205.876	734.663	185.691	280.121	752.121	184.07	257.015	762.088	261.771	274.621	729.656	361.435	724.853	678.508	-73.4098	752.99	738.146	192.048	683.248	757.679	187.857	704.768	759.566	277.044	689.482	730.777	370.916
213	2.12	474.582	1172.07	139.341	401.148	1169.33	90.3314	541.829	1181.44	88.8776	306.522	1039.79	-35.818	653.952	1036.46	-46.1252	483.696	968.173	40.5467	238.169	688.742	-87.5636	205.882	734.652	185.752	280.101	752.135	184.084	256.983	762.085	261.81	274.62	729.659	361.463	724.88	678.575	-73.4861	752.973	738.133	192.087	683.224	757.679	187.925	704.733	759.571	277.095	689.473	730.791	370.969
214	2.13	474.539	1172	139.308	401.143	1169.32	90.3757	541.799	1181.43	88.9399	306.535	1039.8	-35.7647	653.959	1036.47	-46.0596	483.698	968.153	40.5827	238.161	688.8	-87.5912	205.903	734.644	185.781	280.112	752.102	184.081	256.964	762.084	261.854	274.64	729.656	361.511	724.939	678.687	-73.6015	752.962	738.137	192.069	683.198	757.66	187.952	704.719	759.567	277.136	689.469	730.785	370.988
215	2.14	474.516	1171.9	139.144	401.129	1169.29	90.3431	541.795	1181.43	88.9372	306.538	1039.8	-35.7629	653.957	1036.49	-46.043	483.695	968.085	40.4352	238.152	688.859	-87.6165	205.902	734.632	185.726	280.103	752.052	184.004	256.938	762.058	261.76	274.65	729.636	361.493	724.983	678.81	-73.736	752.971	738.132	192.059	683.198	757.63	187.903	704.719	759.558	277.092	689.465	730.768	370.936
216	2.15	474.505	1171.85	139.09	401.126	1169.26	90.3494	541.807	1181.4	88.9955	306.538	1039.81	-35.7544	653.964	1036.51	-46.0134	483.684	968.052	40.3699	238.141	688.885	-87.6127	205.897	734.624	185.691	280.122	752.038	183.999	256.972	762.044	261.724	274.655	729.618	361.486	725.005	678.896	-73.7776	752.981	738.122	192.135	683.21	757.617	187.873	704.721	759.554	277.098	689.465	730.747	370.893
217	2.16	474.496	1171.82	139.2	401.135	1169.26	90.4243	541.801	1181.4	89.0683	306.537	1039.82	-35.7208	653.963	1036.53	-45.955	483.713	968.112	40.549	238.132	688.887	-87.5972	205.91	734.626	185.72	280.149	752.058	184.061	257.028	762.043	261.827	274.685	729.628	361.533	725.02	678.863	-73.686	752.977	738.146	192.166	683.228	757.633	187.958	704.743	759.566	277.166	689.484	730.757	370.939
218	2.17	474.485	1171.83	139.332	401.133	1169.26	90.4553	541.783	1181.42	89.1034	306.527	1039.83	-35.7047	653.953	1036.55	-45.9312	483.689	968.189	40.6428	238.104	688.868	-87.5818	205.901	734.638	185.75	280.141	752.098	184.087	257.032	762.04	261.838	274.677	729.637	361.505	725.012	678.783	-73.5609	752.975	738.172	192.164	683.213	757.649	187.933	704.743	759.57	277.181	689.484	730.774	370.951
219	2.18	474.422	1171.86	139.303	401.081	1169.26	90.4163	541.759	1181.41	89.1253	306.489	1039.83	-35.724	653.926	1036.56	-45.9378	483.626	968.226	40.6279	238.081	688.874	-87.5956	205.84	734.656	185.706	280.085	752.125	184.028	256.978	762.024	261.741	274.631	729.642	361.44	724.976	678.709	-73.4709	752.972	738.174	192.14	683.19	757.648	187.85	704.721	759.574	277.145	689.469	730.774	370.913
220	2.19	474.41	1171.86	139.424	401.067	1169.26	90.4669	541.724	1181.4	89.1333	306.468	1039.84	-35.7083	653.907	1036.56	-45.9323	483.617	968.259	40.7016	238.055	688.851	-87.5499	205.802	734.667	185.68	280.068	752.141	184.016	256.963	762.037	261.71	274.618	729.652	361.447	724.949	678.632	-73.378	752.966	738.157	192.126	683.188	757.655	187.873	704.723	759.568	277.097	689.471	730.764	370.909
221	2.2	474.455	1171.87	139.598	401.098	1169.25	90.5583	541.724	1181.36	89.1206	306.477	1039.84	-35.672	653.926	1036.56	-45.8721	483.655	968.273	40.804	238.026	688.841	-87.531	205.836	734.662	185.739	280.11	752.167	184.11	257.011	762.05	261.818	274.645	729.647	361.501	724.943	678.653	-73.4038	752.975	738.134	192.118	683.211	757.65	187.906	704.751	759.565	277.124	689.496	730.746	370.928
222	2.21	474.48	1171.82	139.451	401.116	1169.24	90.5481	541.751	1181.33	89.0628	306.499	1039.84	-35.6624	653.947	1036.57	-45.8613	483.693	968.221	40.7297	238	688.874	-87.564	205.878	734.631	185.736	280.14	752.133	184.097	257.026	762.042	261.809	274.683	729.63	361.532	724.96	678.729	-73.4815	752.997	738.1	192.092	683.258	757.631	187.9	704.778	759.535	277.112	689.524	730.719	370.912
223	2.22	474.514	1171.79	139.272	401.114	1169.21	90.4507	541.765	1181.32	89.0344	306.512	1039.85	-35.6709	653.96	1036.58	-45.8779	483.715	968.158	40.5789	237.986	688.927	-87.6061	205.909	734.605	185.713	280.166	752.068	184.056	257.024	762.039	261.752	274.712	729.609	361.51	724.98	678.855	-73.6505	753.011	738.069	192.1	683.268	757.593	187.832	704.788	759.518	277.069	689.536	730.697	370.875
224	2.23	474.531	1171.77	139.287	401.112	1169.2	90.4689	541.739	1181.34	89.0635	306.512	1039.87	-35.6526	653.971	1036.59	-45.8357	483.724	968.166	40.6601	237.965	688.976	-87.6103	205.944	734.604	185.773	280.179	752.042	184.058	257.034	762.048	261.793	274.737	729.607	361.537	724.991	678.951	-73.7684	752.994	738.058	192.138	683.26	757.605	187.892	704.771	759.531	277.099	689.535	730.709	370.906
225	2.24	474.52	1171.85	139.456	401.107	1169.22	90.5586	541.703	1181.36	89.0771	306.51	1039.89	-35.6024	653.965	1036.62	-45.7913	483.712	968.246	40.8375	237.936	689	-87.5866	205.944	734.639	185.849	280.165	752.087	184.092	257.059	762.064	261.891	274.741	729.632	361.587	724.984	679.004	-73.7878	752.976	738.102	192.172	683.243	757.656	188.016	704.755	759.558	277.175	689.512	730.748	370.987
226	2.25	474.469	1171.92	139.469	401.074	1169.25	90.5343	541.678	1181.42	89.0815	306.482	1039.92	-35.5841	653.932	1036.65	-45.7864	483.661	968.32	40.9103	237.918	689.02	-87.5682	205.887	734.678	185.803	280.133	752.144	184.117	257.046	762.083	261.896	274.719	729.669	361.577	724.96	679.018	-73.733	752.961	738.153	192.195	683.204	757.712	188.022	704.739	759.608	277.191	689.485	730.787	371.025
227	2.26	474.396	1171.95	139.391	401.043	1169.27	90.4862	541.656	1181.48	89.0994	306.437	1039.94	-35.6219	653.909	1036.68	-45.795	483.587	968.389	40.9296	237.895	689.017	-87.5617	205.816	734.708	185.727	280.077	752.196	184.078	257.006	762.096	261.843	274.668	729.685	361.51	724.942	678.969	-73.6562	752.946	738.197	192.208	683.184	757.744	187.99	704.724	759.633	277.183	689.454	730.827	371.028
228	2.27	474.372	1172	139.435	401.016	1169.29	90.4976	541.635	1181.52	89.0764	306.399	1039.94	-35.6424	653.879	1036.69	-45.8011	483.537	968.462	41.0007	237.869	688.975	-87.5178	205.776	734.714	185.728	280.044	752.212	184.092	256.986	762.102	261.839	274.627	729.692	361.474	724.926	678.911	-73.5951	752.925	738.214	192.214	683.17	757.746	187.991	704.708	759.633	277.207	689.427	730.84	371.023
229	2.28	474.337	1171.94	139.333	400.996	1169.29	90.4783	541.623	1181.5	89.0321	306.384	1039.92	-35.6319	653.861	1036.69	-45.7952	483.532	968.474	41.007	237.847	688.934	-87.449	205.768	734.692	185.728	280.043	752.196	184.126	256.966	762.089	261.85	274.621	729.663	361.478	724.921	678.845	-73.5073	752.935	738.208	192.174	683.174	757.742	187.982	704.719	759.606	277.212	689.439	730.806	370.998
230	2.29	474.327	1171.86	139.154	400.99	1169.25	90.4138	541.638	1181.43	88.9643	306.383	1039.9	-35.6393	653.86	1036.66	-45.7754	483.557	968.393	40.8824	237.817	688.918	-87.4231	205.77	734.66	185.697	280.037	752.134	184.078	256.958	762.058	261.831	274.626	729.608	361.472	724.921	678.826	-73.483	752.971	738.146	192.154	683.196	757.677	187.914	704.735	759.553	277.137	689.457	730.724	370.936
231	2.3	474.33	1171.79	138.99	400.991	1169.22	90.373	541.652	1181.39	88.8968	306.38	1039.9	-35.66	653.855	1036.65	-45.7739	483.575	968.303	40.7633	237.795	688.957	-87.4549	205.799	734.634	185.697	280.056	752.085	184.023	256.958	762.051	261.821	274.654	729.599	361.484	724.929	678.873	-73.5007	752.991	738.1	192.131	683.217	757.585	187.848	704.738	759.496	277.098	689.473	730.676	370.893
232	2.31	474.339	1171.77	138.966	400.996	1169.21	90.3605	541.618	1181.39	88.8871	306.386	1039.93	-35.6675	653.851	1036.68	-45.802	483.573	968.303	40.745	237.795	689.001	-87.4912	205.827	734.634	185.739	280.083	752.074	184.017	256.955	762.076	261.829	274.691	729.617	361.524	724.955	678.97	-73.5779	753.003	738.079	192.115	683.231	757.578	187.874	704.739	759.486	277.102	689.471	730.672	370.903
233	2.32	474.321	1171.81	139.023	401.003	1169.23	90.3907	541.582	1181.39	88.8586	306.393	1039.96	-35.6753	653.856	1036.72	-45.816	483.577	968.363	40.8012	237.796	689.025	-87.4938	205.849	734.632	185.798	280.108	752.107	184.043	256.989	762.107	261.922	274.715	729.638	361.59	724.989	679.057	-73.6796	752.994	738.067	192.111	683.237	757.613	187.949	704.74	759.526	277.123	689.467	730.69	370.94
234	2.33	474.341	1171.9	139.2	401.015	1169.25	90.4036	541.555	1181.41	88.7949	306.395	1040	-35.6786	653.863	1036.74	-45.8179	483.572	968.449	40.8838	237.781	689.058	-87.4857	205.86	734.652	185.812	280.097	752.15	184.075	257.021	762.111	261.974	274.731	729.655	361.597	725	679.106	-73.7449	752.978	738.097	192.149	683.232	757.659	188	704.741	759.567	277.154	689.452	730.736	370.982
235	2.34	474.33	1171.95	139.164	400.999	1169.28	90.355	541.526	1181.49	88.7496	306.38	1040.04	-35.7074	653.851	1036.78	-45.8328	483.543	968.557	40.9602	237.777	689.102	-87.5321	205.846	734.7	185.777	280.082	752.202	184.055	257.031	762.13	261.902	274.712	729.678	361.552	724.99	679.139	-73.7491	752.961	738.15	192.175	683.218	757.725	188.027	704.739	759.612	277.152	689.438	730.802	371.015
236	2.35	474.263	1172	139.06	400.954	1169.3	90.2881	541.505	1181.57	88.7363	306.347	1040.07	-35.7323	653.825	1036.81	-45.8247	483.49	968.635	40.9843	237.774	689.132	-87.5538	205.825	734.724	185.741	280.066	752.224	184.074	257.01	762.131	261.798	274.687	729.687	361.55	724.98	679.165	-73.7155	752.954	738.198	192.185	683.201	757.751	188.013	704.724	759.64	277.138	689.407	730.831	371.037
237	2.36	474.214	1172	139.054	400.922	1169.31	90.2613	541.474	1181.6	88.7123	306.322	1040.08	-35.7123	653.808	1036.81	-45.7869	483.465	968.688	41.1	237.739	689.115	-87.4823	205.815	734.702	185.768	280.054	752.226	184.128	257	762.086	261.835	274.666	729.685	361.578	724.974	679.134	-73.6286	752.957	738.205	192.192	683.176	757.75	188.025	704.717	759.639	277.171	689.402	730.829	371.051
238	2.37	474.203	1172.02	139.056	400.908	1169.3	90.236	541.457	1181.59	88.6926	306.319	1040.07	-35.7012	653.81	1036.81	-45.7537	483.473	968.714	41.1526	237.739	689.089	-87.413	205.815	734.689	185.798	280.077	752.212	184.137	257.007	762.084	261.94	274.668	729.674	361.586	724.975	679.092	-73.5429	752.959	738.197	192.182	683.19	757.722	188.043	704.727	759.627	277.194	689.436	730.803	371.026
239	2.38	474.172	1172.01	138.956	400.896	1169.29	90.188	541.451	1181.57	88.6584	306.31	1040.05	-35.7459	653.818	1036.81	-45.7791	483.471	968.666	41.007	237.774	689.07	-87.4357	205.819	734.668	185.742	280.087	752.167	184.076	256.992	762.078	261.886	274.686	729.633	361.562	725.005	679.079	-73.5456	752.983	738.185	192.189	683.212	757.675	187.984	704.739	759.596	277.162	689.466	730.758	370.982
240	2.39	474.121	1171.95	138.832	400.866	1169.26	90.124	541.445	1181.55	88.619	306.305	1040.05	-35.7769	653.826	1036.8	-45.7937	483.446	968.601	40.8002	237.797	689.067	-87.458	205.814	734.635	185.695	280.068	752.122	184.024	256.979	762.081	261.84	274.702	729.608	361.547	725.02	679.104	-73.6086	753.001	738.149	192.184	683.233	757.625	187.92	704.742	759.552	277.152	689.472	730.716	370.948
241	2.4	474.084	1171.94	138.826	400.852	1169.25	90.119	541.433	1181.53	88.5952	306.305	1040.06	-35.764	653.814	1036.81	-45.7744	483.464	968.59	40.8259	237.801	689.065	-87.4139	205.831	734.625	185.751	280.071	752.123	184.052	256.994	762.081	261.889	274.703	729.61	361.584	725.021	679.124	-73.6095	753	738.115	192.202	683.241	757.607	187.932	704.739	759.535	277.175	689.478	730.692	370.97
242	2.41	474.088	1171.99	138.886	400.843	1169.27	90.138	541.413	1181.53	88.5634	306.314	1040.08	-35.7568	653.813	1036.83	-45.7588	483.469	968.63	40.899	237.798	689.07	-87.3855	205.857	734.631	185.827	280.096	752.128	184.075	257.017	762.088	261.947	274.719	729.617	361.612	725.018	679.136	-73.5888	752.998	738.099	192.186	683.259	757.62	187.98	704.749	759.533	277.187	689.497	730.689	370.945
243	2.42	474.012	1172.02	138.773	400.807	1169.28	90.0798	541.373	1181.56	88.4521	306.307	1040.1	-35.794	653.798	1036.85	-45.8033	483.437	968.692	40.9189	237.793	689.105	-87.456	205.861	734.653	185.808	280.087	752.138	184.066	257.016	762.095	261.894	274.709	729.642	361.587	725.03	679.189	-73.6044	752.98	738.113	192.125	683.251	757.639	187.935	704.736	759.538	277.131	689.488	730.716	370.945
244	2.43	473.968	1172.08	138.821	400.772	1169.3	90.0421	541.309	1181.59	88.4432	306.277	1040.11	-35.8122	653.77	1036.87	-45.8404	483.388	968.763	40.9251	237.754	689.127	-87.4701	205.832	734.682	185.76	280.036	752.162	184.021	257.005	762.091	261.82	274.676	729.65	361.529	725.015	679.237	-73.6652	752.948	738.14	192.119	683.224	757.687	187.962	704.706	759.558	277.117	689.458	730.749	370.974
245	2.44	473.941	1172.13	138.959	400.747	1169.32	90.057	541.262	1181.64	88.4597	306.254	1040.13	-35.7946	653.755	1036.9	-45.7892	483.378	968.861	41.0987	237.715	689.149	-87.4541	205.792	734.702	185.746	280.01	752.18	184.02	257.011	762.089	261.841	274.67	729.661	361.533	725	679.276	-73.6888	752.925	738.179	192.162	683.192	757.746	188.06	704.69	759.588	277.177	689.431	730.787	371.019
246	2.45	473.91	1172.2	139.018	400.715	1169.34	90.0408	541.245	1181.7	88.4553	306.238	1040.16	-35.7831	653.742	1036.95	-45.7734	483.393	968.929	41.1777	237.69	689.18	-87.4456	205.78	734.717	185.771	280.019	752.206	184.081	257.01	762.098	261.889	274.676	729.677	361.563	725.004	679.328	-73.7146	752.924	738.213	192.195	683.172	757.78	188.059	704.687	759.625	277.212	689.422	730.818	371.049
247	2.46	473.892	1172.21	138.991	400.69	1169.33	90.0294	541.229	1181.74	88.4624	306.232	1040.18	-35.7647	653.729	1036.98	-45.773	483.393	968.959	41.1597	237.67	689.214	-87.4463	205.765	734.716	185.771	280.013	752.211	184.111	256.987	762.13	261.887	274.677	729.68	361.563	725.009	679.394	-73.7402	752.939	738.23	192.216	683.153	757.775	188.029	704.688	759.642	277.21	689.417	730.837	371.068
248	2.47	473.887	1172.18	138.9	400.695	1169.3	90.0473	541.227	1181.73	88.4893	306.242	1040.19	-35.7251	653.743	1036.98	-45.7227	483.413	968.968	41.1957	237.666	689.203	-87.3953	205.769	734.702	185.799	280.02	752.188	184.113	256.972	762.129	261.9	274.674	729.662	361.561	725.033	679.399	-73.6944	752.961	738.193	192.262	683.159	757.736	188.042	704.691	759.625	277.232	689.427	730.81	371.065
249	2.48	473.934	1172.16	138.943	400.723	1169.28	90.0924	541.252	1181.7	88.5276	306.258	1040.18	-35.6686	653.755	1036.98	-45.6606	483.447	968.95	41.2242	237.664	689.193	-87.3167	205.79	734.674	185.818	280.048	752.166	184.112	256.98	762.094	261.939	274.689	729.65	361.59	725.066	679.381	-73.6279	752.987	738.156	192.297	683.214	757.698	188.104	704.713	759.604	277.249	689.447	730.773	371.071
250	2.49	473.956	1172.14	138.906	400.728	1169.26	90.0757	541.258	1181.68	88.4996	306.277	1040.17	-35.6548	653.781	1036.98	-45.658	483.466	968.933	41.2101	237.666	689.194	-87.313	205.834	734.647	185.808	280.072	752.135	184.093	257.007	762.078	261.942	274.713	729.624	361.597	725.074	679.364	-73.644	753.01	738.122	192.266	683.245	757.646	188.046	704.741	759.566	277.227	689.48	730.727	371.028
251	2.5	473.904	1172.1	138.71	400.714	1169.26	90.0308	541.261	1181.66	88.4322	306.279	1040.17	-35.6938	653.797	1036.98	-45.7081	483.458	968.904	41.093	237.66	689.199	-87.3681	205.853	734.637	185.764	280.077	752.146	184.051	257.041	762.08	261.871	274.729	729.596	361.547	725.073	679.358	-73.6813	753.008	738.098	192.198	683.256	757.619	187.928	704.75	759.536	277.147	689.506	730.692	370.965
252	2.51	473.884	1172.12	138.702	400.701	1169.27	90.0382	541.26	1181.65	88.3869	306.262	1040.19	-35.688	653.792	1036.99	-45.7174	483.448	968.946	41.1551	237.649	689.203	-87.3728	205.844	734.658	185.765	280.088	752.166	184.099	257.044	762.084	261.834	274.739	729.609	361.575	725.085	679.332	-73.648	753.003	738.089	192.14	683.262	757.63	187.906	704.753	759.524	277.102	689.499	730.7	370.927
253	2.52	473.871	1172.15	138.818	400.663	1169.29	90.0648	541.213	1181.67	88.3978	306.234	1040.21	-35.6587	653.763	1037.01	-45.6625	483.418	969.023	41.3172	237.621	689.218	-87.3343	205.827	734.696	185.819	280.066	752.193	184.148	257.032	762.082	261.905	274.731	729.651	361.65	725.071	679.354	-73.6367	752.966	738.107	192.118	683.248	757.674	187.947	704.721	759.524	277.135	689.464	730.717	370.933
254	2.53	473.853	1172.18	138.923	400.634	1169.3	90.0755	541.169	1181.68	88.4437	306.204	1040.23	-35.6447	653.718	1037.02	-45.6233	483.395	969.068	41.3728	237.615	689.263	-87.3536	205.783	734.714	185.801	280.035	752.202	184.132	256.991	762.06	261.932	274.702	729.665	361.678	725.056	679.41	-73.6767	752.937	738.134	192.157	683.203	757.698	187.997	704.683	759.529	277.166	689.417	730.738	370.992
255	2.54	473.852	1172.19	138.908	400.637	1169.28	90.0641	541.175	1181.67	88.4933	306.199	1040.24	-35.6237	653.71	1037.04	-45.592	483.39	969.076	41.3428	237.638	689.3	-87.3941	205.779	734.704	185.781	280.024	752.201	184.125	256.967	762.048	261.905	274.709	729.647	361.64	725.071	679.462	-73.6923	752.939	738.157	192.204	683.179	757.709	188.02	704.678	759.554	277.188	689.393	730.765	371.045
256	2.55	473.861	1172.12	138.878	400.671	1169.27	90.0829	541.184	1181.68	88.5046	306.218	1040.27	-35.5964	653.724	1037.07	-45.5445	483.432	969.115	41.4385	237.655	689.333	-87.4088	205.82	734.689	185.837	280.066	752.219	184.157	256.985	762.092	261.938	274.732	729.637	361.621	725.088	679.526	-73.7242	752.958	738.166	192.236	683.204	757.731	188.048	704.701	759.588	277.225	689.399	730.792	371.075
257	2.56	473.886	1172.07	138.931	400.696	1169.26	90.1615	541.192	1181.65	88.5452	306.229	1040.29	-35.562	653.733	1037.09	-45.5024	483.459	969.134	41.5282	237.655	689.348	-87.3708	205.831	734.677	185.859	280.082	752.201	184.171	257.008	762.135	261.987	274.752	729.642	361.655	725.095	679.547	-73.7043	752.977	738.165	192.257	683.246	757.731	188.089	704.721	759.592	277.303	689.4	730.792	371.104
258	2.57	473.911	1172.02	138.971	400.692	1169.24	90.1586	541.21	1181.61	88.5924	306.229	1040.29	-35.5552	653.744	1037.07	-45.471	483.453	969.11	41.4973	237.662	689.336	-87.3336	205.818	734.66	185.814	280.075	752.166	184.122	256.995	762.116	261.955	274.736	729.629	361.635	725.109	679.531	-73.6245	752.989	738.155	192.28	683.262	757.697	188.087	704.728	759.601	277.29	689.422	730.769	371.074
259	2.58	473.914	1172.02	138.924	400.672	1169.24	90.1143	541.221	1181.61	88.6054	306.23	1040.3	-35.5733	653.749	1037.07	-45.4749	483.446	969.115	41.4084	237.67	689.326	-87.327	205.797	734.656	185.754	280.072	752.164	184.099	256.985	762.113	261.894	274.711	729.625	361.591	725.112	679.49	-73.5656	753.008	738.162	192.228	683.258	757.674	188.005	704.731	759.597	277.236	689.46	730.751	371.024
260	2.59	473.89	1172.05	138.99	400.663	1169.24	90.1416	541.193	1181.62	88.6293	306.223	1040.31	-35.5906	653.753	1037.07	-45.4628	483.443	969.187	41.5084	237.664	689.29	-87.3053	205.773	734.673	185.75	280.053	752.206	184.1	256.991	762.13	261.88	274.701	729.643	361.574	725.104	679.426	-73.5284	752.998	738.166	192.208	683.246	757.684	187.979	704.716	759.592	277.209	689.462	730.755	370.989
261	2.6	473.838	1172.06	139.063	400.628	1169.25	90.1647	541.154	1181.6	88.6561	306.205	1040.31	-35.5772	653.751	1037.06	-45.418	483.425	969.266	41.642	237.666	689.259	-87.2865	205.742	734.703	185.766	280.007	752.243	184.137	256.97	762.108	261.918	274.676	729.65	361.593	725.121	679.376	-73.4973	752.96	738.161	192.195	683.218	757.705	187.994	704.689	759.587	277.207	689.443	730.77	371.01
262	2.61	473.781	1172.03	139.071	400.591	1169.22	90.1759	541.132	1181.57	88.6876	306.185	1040.31	-35.5788	653.735	1037.05	-45.3903	483.375	969.25	41.5797	237.68	689.252	-87.2811	205.724	734.709	185.781	279.946	752.233	184.121	256.925	762.071	261.909	274.66	729.66	361.615	725.138	679.362	-73.4974	752.939	738.144	192.19	683.181	757.698	187.984	704.661	759.567	277.174	689.433	730.765	371.015
263	2.62	473.771	1172.01	139.03	400.595	1169.2	90.1646	541.126	1181.57	88.7193	306.19	1040.31	-35.5882	653.747	1037.06	-45.3548	483.362	969.2	41.4911	237.708	689.273	-87.3206	205.74	734.692	185.791	279.948	752.204	184.073	256.91	762.056	261.889	274.674	729.653	361.612	725.156	679.413	-73.5617	752.944	738.134	192.185	683.184	757.691	188.003	704.663	759.548	277.175	689.442	730.749	371.016
264	2.63	473.783	1171.94	139.001	400.603	1169.16	90.1586	541.144	1181.54	88.7399	306.212	1040.31	-35.5701	653.768	1037.07	-45.3115	483.391	969.179	41.5261	237.732	689.322	-87.376	205.772	734.679	185.804	279.998	752.184	184.079	256.905	762.045	261.888	274.697	729.643	361.627	725.148	679.506	-73.661	752.948	738.132	192.198	683.208	757.667	188.001	704.669	759.542	277.192	689.475	730.729	371.026
265	2.64	473.816	1171.87	138.974	400.625	1169.13	90.1851	541.148	1181.52	88.8	306.214	1040.33	-35.5499	653.78	1037.08	-45.2422	483.417	969.124	41.558	237.734	689.349	-87.3628	205.815	734.648	185.83	280.048	752.168	184.101	256.922	762.047	261.908	274.73	729.612	361.669	725.152	679.588	-73.6852	752.953	738.125	192.264	683.217	757.659	188.035	704.678	759.553	277.234	689.504	730.715	371.052
266	2.65	473.863	1171.86	139.017	400.654	1169.13	90.2072	541.168	1181.5	88.826	306.218	1040.35	-35.5522	653.786	1037.08	-45.194	483.457	969.148	41.6253	237.745	689.381	-87.3555	205.854	734.624	185.852	280.053	752.138	184.081	256.95	762.047	261.928	274.741	729.572	361.654	725.164	679.621	-73.6816	752.984	738.123	192.273	683.231	757.659	188.03	704.698	759.572	277.261	689.539	730.744	371.054
267	2.66	473.87	1171.86	139.007	400.653	1169.15	90.2061	541.173	1181.52	88.8197	306.219	1040.38	-35.5924	653.788	1037.1	-45.1848	483.485	969.244	41.7263	237.758	689.399	-87.3588	205.86	734.62	185.828	280.063	752.153	184.064	256.978	762.068	261.923	274.75	729.587	361.633	725.155	679.617	-73.6694	752.995	738.158	192.269	683.234	757.676	187.989	704.71	759.599	277.236	689.548	730.766	371.017
268	2.67	473.825	1171.91	139.044	400.633	1169.18	90.2368	541.15	1181.54	88.8798	306.203	1040.41	-35.6022	653.77	1037.13	-45.1743	483.449	969.306	41.731	237.772	689.383	-87.3605	205.802	734.646	185.76	280.037	752.198	184.075	257.006	762.104	261.922	274.717	729.626	361.601	725.157	679.599	-73.6304	752.972	738.201	192.266	683.215	757.724	187.974	704.705	759.62	277.227	689.535	730.787	371.013
269	2.68	473.788	1172	139.2	400.61	1169.21	90.2802	541.115	1181.54	88.9307	306.187	1040.43	-35.5439	653.746	1037.15	-45.1187	483.429	969.394	41.8516	237.783	689.366	-87.3513	205.757	734.689	185.786	280.016	752.256	184.139	257.005	762.122	262.014	274.686	729.66	361.622	725.169	679.561	-73.5486	752.949	738.219	192.286	683.19	757.754	188.039	704.698	759.657	277.253	689.509	730.803	371.041
270	2.69	473.759	1172.05	139.307	400.59	1169.22	90.3319	541.09	1181.53	88.9526	306.179	1040.44	-35.4886	653.746	1037.15	-45.0394	483.423	969.456	42.0006	237.811	689.34	-87.3314	205.769	734.718	185.862	280.02	752.295	184.192	256.986	762.132	262.095	274.674	729.692	361.669	725.19	679.501	-73.4628	752.94	738.201	192.278	683.191	757.765	188.103	704.689	759.653	277.269	689.505	730.796	371.034
271	2.7	473.72	1171.99	139.214	400.56	1169.2	90.3273	541.094	1181.52	88.9364	306.184	1040.43	-35.5171	653.751	1037.13	-45.0396	483.414	969.414	41.9456	237.856	689.332	-87.3424	205.793	734.712	185.849	280.009	752.284	184.165	256.965	762.115	262.053	274.684	729.684	361.652	725.224	679.461	-73.4474	752.95	738.177	192.23	683.189	757.739	188.054	704.684	759.611	277.232	689.493	730.773	371.007
272	2.71	473.711	1171.9	139.065	400.559	1169.14	90.2666	541.111	1181.47	88.9181	306.187	1040.4	-35.5391	653.76	1037.12	-45.0747	483.4	969.326	41.8119	237.882	689.327	-87.3681	205.8	734.692	185.802	280.011	752.222	184.091	256.937	762.081	261.938	274.698	729.644	361.639	725.241	679.477	-73.5006	752.97	738.132	192.232	683.191	757.67	187.969	704.673	759.544	277.196	689.502	730.722	370.97
273	2.72	473.724	1171.81	138.991	400.579	1169.1	90.2804	541.119	1181.42	88.9349	306.208	1040.37	-35.5143	653.778	1037.12	-45.0357	483.409	969.246	41.7799	237.885	689.337	-87.3696	205.837	734.66	185.843	280.044	752.169	184.103	256.948	762.062	261.977	274.732	729.617	361.678	725.253	679.529	-73.5576	752.977	738.101	192.253	683.213	757.612	187.965	704.674	759.509	277.211	689.513	730.678	370.975
274	2.73	473.761	1171.74	138.957	400.583	1169.1	90.3102	541.126	1181.41	88.9559	306.208	1040.38	-35.509	653.779	1037.12	-45.0087	483.447	969.252	41.8223	237.875	689.346	-87.3481	205.887	734.641	185.887	280.077	752.152	184.16	256.99	762.071	262.055	274.746	729.615	361.696	725.254	679.596	-73.6082	752.987	738.088	192.252	683.24	757.6	187.996	704.697	759.517	277.227	689.522	730.678	370.989
275	2.74	473.769	1171.74	139.006	400.568	1169.09	90.2703	541.12	1181.42	88.9504	306.186	1040.39	-35.5104	653.76	1037.14	-45.0068	483.444	969.263	41.7785	237.877	689.359	-87.3663	205.876	734.637	185.837	280.084	752.151	184.136	256.967	762.093	262.009	274.731	729.613	361.643	725.245	679.616	-73.5862	752.993	738.103	192.24	683.241	757.634	187.995	704.696	759.528	277.218	689.5	730.704	371.003
276	2.75	473.731	1171.77	139.023	400.541	1169.08	90.2353	541.094	1181.44	88.9323	306.168	1040.4	-35.5005	653.733	1037.16	-45.0084	483.423	969.315	41.78	237.897	689.362	-87.3801	205.832	734.651	185.788	280.051	752.156	184.096	256.93	762.094	261.94	274.703	729.603	361.584	725.233	679.591	-73.5264	752.98	738.132	192.223	683.22	757.69	188.008	704.678	759.556	277.225	689.458	730.744	371.027
277	2.76	473.704	1171.85	139.151	400.513	1169.12	90.3037	541.054	1181.5	88.9817	306.139	1040.43	-35.4991	653.708	1037.19	-44.9647	483.413	969.448	41.9836	237.881	689.355	-87.3466	205.793	734.691	185.801	280.022	752.213	184.149	256.944	762.102	261.974	274.683	729.622	361.605	725.216	679.601	-73.5282	752.958	738.194	192.228	683.204	757.767	188.102	704.661	759.61	277.266	689.427	730.812	371.081
278	2.77	473.653	1171.9	139.185	400.484	1169.16	90.3643	541.016	1181.54	89.0178	306.114	1040.45	-35.4883	653.67	1037.22	-44.9541	483.378	969.541	42.1302	237.855	689.357	-87.3238	205.758	734.713	185.825	279.999	752.272	184.195	256.946	762.097	261.989	274.656	729.643	361.633	725.197	679.602	-73.5134	752.93	738.25	192.237	683.177	757.819	188.138	704.625	759.634	277.31	689.382	730.852	371.143
279	2.78	473.604	1171.89	139.13	400.463	1169.15	90.3529	541.005	1181.55	89.0406	306.097	1040.46	-35.4849	653.659	1037.23	-44.9732	483.32	969.541	42.0484	237.877	689.369	-87.3331	205.728	734.724	185.785	279.969	752.275	184.153	256.917	762.083	261.917	274.644	729.665	361.613	725.213	679.622	-73.4935	752.929	738.257	192.282	683.154	757.808	188.076	704.611	759.628	277.306	689.348	730.842	371.129
280	2.79	473.627	1171.87	139.237	400.482	1169.14	90.336	541.037	1181.52	89.0537	306.125	1040.46	-35.481	653.688	1037.22	-44.9592	483.32	969.525	41.9813	237.898	689.369	-87.3399	205.752	734.724	185.79	279.996	752.254	184.15	256.928	762.089	261.925	274.672	729.667	361.627	725.234	679.665	-73.5368	752.942	738.201	192.317	683.166	757.762	188.063	704.637	759.609	277.282	689.357	730.8	371.112
281	2.8	473.689	1171.88	139.301	400.517	1169.13	90.39	541.049	1181.47	89.0536	306.172	1040.44	-35.4687	653.734	1037.2	-44.9188	483.398	969.509	42.0433	237.903	689.361	-87.337	205.828	734.701	185.863	280.046	752.236	184.183	256.971	762.096	262.012	274.729	729.659	361.679	725.261	679.674	-73.5727	752.978	738.141	192.296	683.225	757.722	188.102	704.687	759.585	277.298	689.394	730.754	371.103
282	2.81	473.72	1171.8	139.175	400.544	1169.12	90.438	541.07	1181.41	89.03	306.2	1040.42	-35.4698	653.755	1037.17	-44.9319	483.444	969.448	41.983	237.895	689.343	-87.3144	205.885	734.656	185.89	280.105	752.184	184.195	256.992	762.09	262.057	274.767	729.637	361.712	725.269	679.657	-73.5734	753.026	738.083	192.257	683.299	757.65	188.024	704.737	759.542	277.275	689.443	730.69	371.045
283	2.82	473.711	1171.72	139.003	400.531	1169.07	90.3684	541.082	1181.39	89.0227	306.199	1040.38	-35.4899	653.755	1037.15	-44.9751	483.442	969.352	41.8186	237.863	689.324	-87.2927	205.912	734.608	185.836	280.119	752.111	184.152	256.99	762.06	261.981	274.777	729.59	361.681	725.265	679.643	-73.5607	753.045	738.042	192.247	683.322	757.593	187.925	704.757	759.487	277.195	689.477	730.643	371.01
284	2.83	473.719	1171.73	138.999	400.522	1169.05	90.3275	541.064	1181.41	88.9316	306.182	1040.37	-35.5051	653.74	1037.14	-45.0029	483.433	969.321	41.7177	237.833	689.343	-87.331	205.9	734.602	185.775	280.103	752.111	184.098	256.995	762.058	261.892	274.767	729.575	361.631	725.253	679.631	-73.5453	753.048	738.051	192.224	683.309	757.596	187.908	704.742	759.464	277.151	689.48	730.644	370.948
285	2.84	473.652	1171.82	139.048	400.472	1169.07	90.3143	541.003	1181.48	88.8896	306.142	1040.37	-35.4737	653.694	1037.17	-44.9967	483.402	969.382	41.8306	237.782	689.356	-87.3403	205.854	734.629	185.822	280.073	752.157	184.143	257.004	762.051	261.913	274.747	729.601	361.658	725.218	679.621	-73.5384	753.005	738.112	192.202	683.253	757.634	188.004	704.693	759.506	277.213	689.43	730.707	370.988
286	2.85	473.55	1171.9	139.168	400.386	1169.11	90.3366	540.928	1181.54	88.9195	306.087	1040.4	-35.4523	653.616	1037.21	-44.9972	483.332	969.439	41.9199	237.738	689.373	-87.3358	205.758	734.673	185.846	280.002	752.215	184.167	256.962	762.03	261.971	274.701	729.63	361.696	725.195	679.62	-73.5381	752.942	738.171	192.243	683.184	757.709	188.082	704.634	759.554	277.27	689.352	730.781	371.081
287	2.86	473.462	1171.94	139.287	400.326	1169.14	90.3537	540.884	1181.6	88.9826	306.045	1040.44	-35.4661	653.578	1037.24	-44.9825	483.287	969.5	41.9854	237.742	689.39	-87.3416	205.697	734.704	185.824	279.938	752.259	184.152	256.92	762.049	261.988	274.648	729.663	361.666	725.189	679.644	-73.5664	752.909	738.208	192.278	683.138	757.762	188.084	704.609	759.593	277.296	689.299	730.838	371.144
288	2.87	473.453	1172	139.323	400.32	1169.17	90.3425	540.861	1181.64	88.9959	306.058	1040.48	-35.4836	653.587	1037.24	-45.0044	483.309	969.584	42.0646	237.759	689.417	-87.3465	205.708	734.728	185.824	279.94	752.302	184.162	256.916	762.118	261.995	274.639	729.69	361.617	725.212	679.662	-73.5716	752.91	738.231	192.279	683.142	757.804	188.121	704.625	759.625	277.292	689.287	730.88	371.182
289	2.88	473.472	1172.01	139.326	400.352	1169.18	90.372	540.869	1181.6	88.9864	306.089	1040.48	-35.5035	653.612	1037.22	-45.0176	483.356	969.599	42.1099	237.787	689.407	-87.3153	205.752	734.72	185.841	279.986	752.306	184.179	256.941	762.154	262.036	274.671	729.692	361.615	725.233	679.659	-73.5561	752.942	738.199	192.285	683.181	757.769	188.114	704.655	759.622	277.293	689.313	730.847	371.157
290	2.89	473.513	1171.93	139.199	400.391	1169.16	90.3614	540.908	1181.51	88.9761	306.124	1040.43	-35.481	653.64	1037.17	-45.0335	483.403	969.512	42.019	237.805	689.369	-87.2934	205.816	734.659	185.846	280.025	752.234	184.145	256.971	762.135	262.045	274.727	729.66	361.651	725.243	679.612	-73.5052	752.992	738.119	192.29	683.265	757.697	188.056	704.715	759.579	277.26	689.387	730.748	371.071
291	2.9	473.544	1171.84	138.987	400.413	1169.13	90.318	540.938	1181.47	88.9346	306.155	1040.39	-35.4929	653.663	1037.13	-45.0715	483.438	969.429	41.8947	237.813	689.354	-87.3103	205.875	734.608	185.866	280.068	752.169	184.107	256.998	762.114	262.034	274.763	729.622	361.655	725.24	679.583	-73.4957	753.04	738.071	192.23	683.326	757.628	187.949	704.762	759.518	277.181	689.453	730.69	371.006
292	2.91	473.521	1171.75	138.828	400.393	1169.11	90.255	540.935	1181.48	88.8539	306.15	1040.37	-35.5473	653.67	1037.1	-45.1299	483.408	969.352	41.7129	237.808	689.358	-87.3681	205.883	734.595	185.816	280.091	752.138	184.062	256.999	762.085	261.974	274.759	729.596	361.621	725.217	679.567	-73.5375	753.043	738.068	192.176	683.323	757.594	187.848	704.759	759.481	277.133	689.456	730.665	370.95
293	2.92	473.456	1171.75	138.778	400.347	1169.09	90.2491	540.884	1181.51	88.8454	306.107	1040.34	-35.5534	653.645	1037.09	-45.1871	483.347	969.323	41.6478	237.804	689.337	-87.3703	205.829	734.606	185.767	280.017	752.131	184.028	256.965	762.04	261.929	274.723	729.606	361.602	725.215	679.544	-73.571	753.014	738.069	192.172	683.272	757.602	187.866	704.716	759.463	277.146	689.411	730.663	370.935
294	2.93	473.404	1171.9	139.01	400.279	1169.12	90.3051	540.821	1181.56	88.9125	306.066	1040.33	-35.5091	653.595	1037.09	-45.1799	483.291	969.37	41.7765	237.793	689.302	-87.3462	205.767	734.648	185.799	279.964	752.188	184.097	256.906	762.025	261.932	274.675	729.619	361.618	725.206	679.516	-73.5535	752.977	738.107	192.195	683.207	757.634	187.952	704.676	759.484	277.195	689.352	730.714	371.005
295	2.94	473.382	1171.99	139.204	400.224	1169.16	90.3442	540.778	1181.62	88.9392	306.046	1040.36	-35.5025	653.552	1037.12	-45.1827	483.27	969.446	41.9121	237.791	689.294	-87.3424	205.738	734.689	185.827	279.955	752.239	184.162	256.892	762.04	261.97	274.657	729.628	361.646	725.176	679.513	-73.5611	752.943	738.166	192.229	683.187	757.691	188.037	704.652	759.521	277.213	689.323	730.794	371.112
296	2.95	473.367	1172.01	139.218	400.214	1169.18	90.3126	540.766	1181.66	88.9578	306.057	1040.36	-35.5186	653.534	1037.12	-45.2141	483.28	969.45	41.8925	237.78	689.325	-87.375	205.718	734.686	185.789	279.943	752.238	184.141	256.905	762.066	261.985	274.647	729.641	361.609	725.168	679.545	-73.5745	752.938	738.191	192.263	683.176	757.724	188.041	704.646	759.557	277.218	689.313	730.825	371.142
297	2.96	473.39	1171.99	139.187	400.259	1169.18	90.3387	540.787	1181.64	88.9883	306.08	1040.35	-35.5148	653.552	1037.1	-45.236	483.327	969.436	41.8816	237.784	689.34	-87.4059	205.748	734.671	185.799	279.974	752.228	184.126	256.937	762.067	261.968	274.671	729.628	361.574	725.166	679.58	-73.5957	752.964	738.166	192.286	683.197	757.734	188.033	704.673	759.572	277.238	689.346	730.816	371.13
298	2.97	473.445	1171.99	139.168	400.319	1169.18	90.4208	540.819	1181.62	88.973	306.121	1040.35	-35.4993	653.596	1037.07	-45.2387	483.416	969.426	41.9344	237.791	689.321	-87.3655	205.834	734.648	185.839	280.055	752.209	184.155	257.014	762.081	262.037	274.748	729.627	361.656	725.156	679.597	-73.6508	753	738.125	192.29	683.268	757.729	188.068	704.729	759.585	277.26	689.413	730.788	371.132
299	2.98	473.495	1172.02	139.183	400.363	1169.18	90.4446	540.824	1181.61	88.9486	306.153	1040.32	-35.518	653.636	1037.04	-45.2674	483.463	969.405	41.9403	237.792	689.297	-87.335	205.897	734.617	185.871	280.109	752.166	184.162	257.031	762.109	262.028	274.774	729.63	361.653	725.164	679.542	-73.6358	753.038	738.102	192.259	683.316	757.687	188.055	704.774	759.574	277.245	689.474	730.748	371.057
300	2.99	473.45	1172.01	139.122	400.317	1169.15	90.374	540.803	1181.61	88.9156	306.152	1040.29	-35.5521	653.629	1037.01	-45.3284	483.444	969.349	41.7741	237.799	689.27	-87.349	205.876	734.62	185.793	280.1	752.155	184.124	256.985	762.11	261.924	274.75	729.623	361.572	725.168	679.476	-73.6146	753.043	738.103	192.196	683.297	757.64	187.924	704.769	759.548	277.158	689.486	730.713	370.958
301	3	473.36	1171.99	139.115	400.23	1169.15	90.3526	540.748	1181.62	88.9401	306.125	1040.27	-35.5453	653.595	1036.99	-45.375	483.392	969.326	41.7257	237.799	689.254	-87.3594	205.81	734.645	185.762	280.032	752.179	184.099	256.932	762.098	261.903	274.707	729.63	361.555	725.157	679.43	-73.6184	753.012	738.127	192.177	683.246	757.639	187.905	704.722	759.539	277.134	689.441	730.697	370.917
302	3.01	473.278	1172.03	139.25	400.17	1169.18	90.4227	540.687	1181.66	88.9864	306.087	1040.27	-35.5185	653.554	1036.99	-45.3797	483.349	969.332	41.8664	237.79	689.231	-87.3448	205.763	734.679	185.832	279.975	752.211	184.154	256.897	762.077	261.985	274.663	729.643	361.597	725.15	679.368	-73.5679	752.978	738.143	192.179	683.215	757.663	187.986	704.69	759.536	277.189	689.413	730.729	370.968
303	3.02	473.185	1171.98	139.175	400.118	1169.19	90.4288	540.64	1181.69	89.0315	306.067	1040.24	-35.5118	653.528	1036.96	-45.3793	483.307	969.309	41.8673	237.804	689.198	-87.3321	205.711	734.702	185.82	279.927	752.208	184.142	256.889	762.053	261.997	274.631	729.655	361.606	725.156	679.316	-73.5255	752.961	738.162	192.153	683.196	757.662	187.984	704.667	759.519	277.177	689.4	730.75	370.979
304	3.03	473.146	1171.95	139.01	400.108	1169.15	90.371	540.651	1181.66	89.074	306.07	1040.23	-35.5456	653.525	1036.94	-45.42	483.274	969.201	41.6712	237.824	689.215	-87.3648	205.697	734.687	185.725	279.922	752.191	184.079	256.872	762.033	261.895	274.634	729.657	361.552	725.175	679.328	-73.56	752.972	738.155	192.144	683.192	757.656	187.939	704.66	759.512	277.142	689.406	730.752	370.956
305	3.04	473.183	1171.93	138.971	400.15	1169.15	90.4013	540.672	1181.63	89.1102	306.1	1040.23	-35.5544	653.536	1036.91	-45.4104	483.328	969.163	41.6709	237.825	689.251	-87.4067	205.767	734.656	185.762	279.969	752.173	184.073	256.904	762.037	261.886	274.669	729.652	361.564	725.175	679.373	-73.6112	752.997	738.137	192.187	683.21	757.664	187.98	704.681	759.529	277.177	689.431	730.735	370.958
306	3.05	473.281	1171.94	139.194	400.215	1169.18	90.5181	540.697	1181.61	89.1692	306.138	1040.25	-35.5324	653.571	1036.9	-45.3483	483.423	969.185	41.8653	237.83	689.269	-87.3976	205.851	734.629	185.868	280.043	752.179	184.121	256.975	762.07	261.999	274.731	729.637	361.621	725.17	679.416	-73.6256	753.01	738.118	192.245	683.268	757.664	188.039	704.737	759.567	277.263	689.474	730.738	371.002
307	3.06	473.328	1171.91	139.209	400.238	1169.18	90.5104	540.726	1181.58	89.165	306.16	1040.24	-35.541	653.586	1036.9	-45.3465	483.45	969.139	41.7931	237.834	689.281	-87.3888	205.881	734.597	185.851	280.085	752.167	184.122	257.005	762.073	262.005	274.762	729.619	361.654	725.173	679.428	-73.6359	753.031	738.099	192.25	683.296	757.661	188	704.763	759.581	277.247	689.494	730.747	371.004
308	3.07	473.358	1171.92	139.19	400.235	1169.16	90.4635	540.749	1181.58	89.1322	306.165	1040.23	-35.5786	653.568	1036.91	-45.4224	483.43	969.114	41.6516	237.847	689.266	-87.4041	205.874	734.592	185.794	280.103	752.156	184.096	256.994	762.081	261.895	274.738	729.626	361.588	725.171	679.421	-73.6722	753.047	738.116	192.21	683.289	757.665	187.928	704.765	759.582	277.16	689.486	730.769	370.957
309	3.08	473.373	1172.01	139.378	400.211	1169.18	90.4824	540.73	1181.63	89.1304	306.154	1040.22	-35.5869	653.554	1036.92	-45.4547	483.387	969.155	41.6641	237.85	689.242	-87.4145	205.846	734.635	185.801	280.077	752.19	184.125	256.991	762.089	261.888	274.706	729.647	361.576	725.163	679.375	-73.6421	753.027	738.156	192.169	683.27	757.697	187.954	704.753	759.584	277.15	689.477	730.784	370.941
310	3.09	473.313	1172.08	139.512	400.176	1169.21	90.5558	540.691	1181.68	89.1807	306.122	1040.22	-35.5743	653.533	1036.9	-45.4423	483.358	969.199	41.8089	237.865	689.195	-87.3901	205.8	734.679	185.826	280.016	752.247	184.167	256.969	762.071	261.951	274.671	729.669	361.591	725.169	679.31	-73.6059	752.988	738.189	192.167	683.221	757.73	188.023	704.728	759.581	277.191	689.426	730.805	371.007
311	3.1	473.287	1172.07	139.522	400.127	1169.2	90.5354	540.677	1181.7	89.219	306.09	1040.2	-35.5794	653.5	1036.87	-45.4766	483.316	969.176	41.8128	237.874	689.165	-87.3943	205.743	734.705	185.785	279.948	752.249	184.143	256.886	762.025	261.941	274.634	729.666	361.579	725.172	679.24	-73.5508	752.955	738.174	192.182	683.186	757.693	188.022	704.686	759.547	277.198	689.384	730.782	371.006
312	3.11	473.264	1172	139.405	400.137	1169.17	90.4859	540.689	1181.69	89.2031	306.099	1040.17	-35.5936	653.51	1036.84	-45.5079	483.305	969.104	41.6825	237.9	689.162	-87.4278	205.738	734.698	185.754	279.928	752.204	184.092	256.869	762.008	261.915	274.638	729.65	361.566	725.166	679.207	-73.5261	752.962	738.139	192.195	683.178	757.635	187.974	704.679	759.518	277.194	689.391	730.734	370.959
313	3.12	473.344	1171.98	139.349	400.212	1169.17	90.5127	540.74	1181.64	89.1647	306.149	1040.15	-35.5879	653.551	1036.8	-45.5163	483.365	969.035	41.6644	237.914	689.157	-87.4337	205.818	734.646	185.822	280.013	752.174	184.114	256.917	762.017	261.951	274.687	729.633	361.607	725.162	679.202	-73.5534	753.02	738.092	192.16	683.24	757.587	187.942	704.735	759.49	277.191	689.444	730.711	370.962
314	3.13	473.446	1171.94	139.262	400.308	1169.17	90.5598	540.811	1181.58	89.1382	306.193	1040.14	-35.5866	653.592	1036.78	-45.5063	483.43	968.983	41.6264	237.903	689.158	-87.4047	205.898	734.606	185.85	280.111	752.133	184.148	256.985	762.041	261.965	274.746	729.627	361.653	725.154	679.234	-73.5883	753.068	738.052	192.152	683.319	757.581	187.933	704.791	759.488	277.174	689.493	730.689	370.973
315	3.14	473.492	1171.91	139.113	400.352	1169.18	90.5129	540.866	1181.59	89.1006	306.208	1040.13	-35.626	653.606	1036.78	-45.5624	483.445	968.922	41.4923	237.889	689.175	-87.4043	205.936	734.581	185.818	280.13	752.104	184.093	257.016	762.075	261.934	274.763	729.621	361.614	725.132	679.248	-73.624	753.085	738.066	192.172	683.353	757.59	187.912	704.824	759.52	277.125	689.509	730.691	370.958
316	3.15	473.493	1171.97	139.081	400.353	1169.22	90.4721	540.865	1181.62	89.0671	306.192	1040.14	-35.648	653.577	1036.79	-45.6221	483.426	968.945	41.4789	237.873	689.199	-87.4643	205.904	734.594	185.782	280.107	752.138	184.072	256.994	762.111	261.922	274.746	729.622	361.551	725.101	679.241	-73.6513	753.057	738.122	192.16	683.312	757.632	187.945	704.798	759.561	277.118	689.482	730.733	370.949
317	3.16	473.459	1172.08	139.247	400.31	1169.28	90.4926	540.83	1181.7	89.066	306.147	1040.15	-35.6685	653.517	1036.8	-45.6456	483.367	969.044	41.6018	237.855	689.167	-87.4743	205.793	734.65	185.726	280.025	752.205	184.071	256.938	762.146	261.951	274.676	729.645	361.523	725.048	679.199	-73.6307	752.984	738.187	192.146	683.232	757.717	188.03	704.741	759.607	277.197	689.402	730.811	371.005
318	3.17	473.394	1172.23	139.381	400.254	1169.34	90.5204	540.781	1181.74	89.0957	306.09	1040.17	-35.6739	653.466	1036.81	-45.6556	483.295	969.104	41.6886	237.827	689.129	-87.4233	205.708	734.702	185.755	279.943	752.268	184.123	256.861	762.15	262.005	274.609	729.698	361.544	725.01	679.143	-73.5921	752.919	738.218	192.19	683.139	757.771	188.107	704.675	759.637	277.231	689.328	730.874	371.086
319	3.18	473.382	1172.27	139.376	400.252	1169.35	90.5087	540.765	1181.74	89.1067	306.072	1040.16	-35.6882	653.465	1036.79	-45.6765	483.279	969.108	41.7224	237.833	689.095	-87.3957	205.673	734.718	185.769	279.921	752.27	184.127	256.826	762.112	261.985	274.584	729.728	361.564	724.981	679.088	-73.5464	752.904	738.212	192.2	683.125	757.765	188.098	704.649	759.622	277.208	689.313	730.868	371.088
320	3.19	473.449	1172.19	139.365	400.322	1169.32	90.4426	540.839	1181.72	89.0591	306.125	1040.13	-35.7212	653.517	1036.76	-45.73	483.301	969.051	41.6218	237.877	689.104	-87.4309	205.736	734.703	185.786	279.99	752.238	184.136	256.882	762.102	261.912	274.62	729.711	361.573	724.998	679.086	-73.5716	752.929	738.188	192.168	683.17	757.731	188.039	704.689	759.589	277.191	689.361	730.826	371.018
321	3.2	473.545	1172.05	139.191	400.391	1169.27	90.4035	540.928	1181.66	88.9776	306.193	1040.1	-35.7619	653.591	1036.72	-45.7697	483.354	968.946	41.4652	237.921	689.126	-87.5096	205.844	734.658	185.802	280.059	752.189	184.126	256.96	762.086	261.851	274.675	729.671	361.561	725.046	679.111	-73.6386	752.995	738.146	192.124	683.237	757.655	187.956	704.751	759.533	277.139	689.432	730.745	370.942
322	3.21	473.608	1171.94	139.018	400.449	1169.23	90.4239	540.992	1181.59	88.9582	306.236	1040.08	-35.7738	653.638	1036.68	-45.771	483.415	968.843	41.3678	237.949	689.111	-87.4934	205.893	734.61	185.784	280.102	752.126	184.13	257.002	762.048	261.876	274.727	729.633	361.596	725.068	679.122	-73.6954	753.039	738.081	192.126	683.28	757.578	187.915	704.798	759.483	277.117	689.475	730.679	370.953
323	3.22	473.64	1171.93	139.046	400.49	1169.21	90.4434	541.026	1181.57	88.9727	306.263	1040.06	-35.7674	653.652	1036.65	-45.7854	483.456	968.77	41.3329	237.98	689.092	-87.4634	205.921	734.579	185.806	280.112	752.079	184.116	257.011	762.047	261.933	274.744	729.602	361.626	725.09	679.107	-73.6827	753.063	738.045	192.163	683.305	757.531	187.877	704.81	759.469	277.129	689.493	730.654	370.966
324	3.23	473.636	1171.98	139.092	400.481	1169.23	90.3972	541.016	1181.61	88.9566	306.252	1040.08	-35.7803	653.642	1036.66	-45.8058	483.427	968.784	41.2854	238.002	689.108	-87.4805	205.9	734.599	185.807	280.081	752.094	184.06	256.958	762.056	261.916	274.717	729.612	361.606	725.083	679.084	-73.6463	753.055	738.065	192.152	683.292	757.551	187.889	704.789	759.486	277.138	689.488	730.67	370.954
325	3.24	473.622	1172.11	139.169	400.447	1169.29	90.3698	540.987	1181.67	88.9856	306.219	1040.11	-35.7935	653.606	1036.68	-45.8254	483.383	968.873	41.277	237.987	689.128	-87.5012	205.823	734.65	185.764	280.035	752.159	184.037	256.902	762.079	261.897	274.671	729.663	361.571	725.051	679.084	-73.6457	753.017	738.126	192.167	683.244	757.626	187.893	704.75	759.534	277.145	689.442	730.735	370.956
326	3.25	473.599	1172.24	139.283	400.45	1169.34	90.3909	540.971	1181.74	88.9918	306.206	1040.13	-35.7851	653.591	1036.68	-45.8352	483.386	968.987	41.4565	237.974	689.12	-87.4927	205.795	734.672	185.761	280.017	752.222	184.073	256.906	762.104	261.919	274.655	729.689	361.569	725.037	679.04	-73.6	752.988	738.173	192.191	683.226	757.72	187.985	704.752	759.596	277.153	689.408	730.807	371.015
327	3.26	473.618	1172.3	139.326	400.482	1169.39	90.3879	540.99	1181.8	88.9269	306.218	1040.14	-35.7941	653.601	1036.68	-45.8504	483.393	969.044	41.5414	237.98	689.109	-87.5243	205.807	734.681	185.785	280.035	752.247	184.108	256.953	762.131	261.947	274.645	729.683	361.569	725.017	678.979	-73.5647	752.988	738.198	192.174	683.248	757.764	188.052	704.757	759.638	277.165	689.398	730.856	371.066
328	3.27	473.614	1172.34	139.255	400.493	1169.41	90.3052	541.103	1182.13	88.6579	306.224	1040.14	-35.8475	653.608	1036.69	-45.906	483.382	968.996	41.399	237.991	689.127	-87.5727	205.798	734.685	185.743	280.027	752.244	184.087	256.949	762.13	261.887	274.622	729.686	361.513	724.993	678.996	-73.5944	752.987	738.223	192.143	683.228	757.77	188.018	704.748	759.633	277.153	689.391	730.853	371.031
329	3.28	473.596	1172.28	139.076	400.497	1169.38	90.2401	541.246	1182.48	88.3777	306.238	1040.12	-35.8599	653.606	1036.66	-45.9437	483.368	968.897	41.2807	238.007	689.129	-87.5817	205.785	734.663	185.72	280.011	752.201	184.043	256.902	762.081	261.815	274.622	729.668	361.505	725.012	679.033	-73.646	752.985	738.189	192.141	683.217	757.71	187.957	704.739	759.594	277.118	689.395	730.797	370.992
330	3.29	473.644	1172.27	139.136	400.523	1169.36	90.2554	541.113	1181.95	88.7388	306.261	1040.1	-35.8182	653.635	1036.63	-45.9212	483.406	968.843	41.2851	238.026	689.109	-87.5384	205.8	734.645	185.761	280.044	752.165	184.096	256.886	762.058	261.889	274.654	729.643	361.574	725.047	679.041	-73.6679	752.991	738.126	192.188	683.242	757.656	187.963	704.742	759.548	277.177	689.43	730.757	371.025
331	3.3	473.694	1172.29	139.164	400.548	1169.39	90.2869	541.097	1181.81	88.7931	306.289	1040.09	-35.7995	653.663	1036.61	-45.9036	483.449	968.822	41.3115	238.035	689.093	-87.5277	205.826	734.625	185.802	280.071	752.158	184.142	256.903	762.076	261.969	274.682	729.645	361.603	725.063	678.995	-73.6492	753.007	738.102	192.172	683.277	757.634	187.95	704.765	759.528	277.219	689.466	730.732	371.01
332	3.31	473.71	1172.32	139.083	400.559	1169.4	90.2571	541.107	1181.78	88.7888	306.301	1040.08	-35.8277	653.668	1036.58	-45.9284	483.441	968.774	41.1568	238.051	689.076	-87.534	205.817	734.618	185.735	280.065	752.157	184.073	256.873	762.082	261.873	274.68	729.641	361.565	725.068	678.943	-73.6116	753.031	738.113	192.124	683.27	757.605	187.877	704.773	759.517	277.18	689.474	730.707	370.947
333	3.32	473.726	1172.39	139.072	400.574	1169.42	90.2333	541.136	1181.79	88.7809	306.296	1040.07	-35.8581	653.676	1036.58	-45.9479	483.423	968.761	41.1051	238.077	689.055	-87.5301	205.795	734.632	185.658	280.037	752.158	184.005	256.86	762.088	261.78	274.649	729.627	361.509	725.063	678.872	-73.5538	753.042	738.124	192.078	683.245	757.594	187.845	704.778	759.517	277.102	689.474	730.701	370.916
334	3.33	473.744	1172.44	139.164	400.592	1169.47	90.2895	541.138	1181.83	88.7699	306.297	1040.08	-35.8657	653.676	1036.59	-45.9694	483.432	968.829	41.278	238.049	689.039	-87.4965	205.815	734.657	185.73	280.021	752.193	184.05	256.925	762.121	261.865	274.633	729.665	361.53	725.029	678.829	-73.4888	753.021	738.158	192.07	683.25	757.646	187.92	704.771	759.556	277.133	689.477	730.745	370.93
335	3.34	473.768	1172.45	139.265	400.624	1169.51	90.3249	541.123	1181.85	88.8037	306.297	1040.08	-35.8336	653.671	1036.61	-45.9442	483.422	968.899	41.4114	238.027	689.059	-87.5086	205.792	734.68	185.75	280.019	752.217	184.091	256.962	762.125	261.905	274.619	729.714	361.547	724.978	678.813	-73.4569	753.005	738.194	192.119	683.248	757.711	187.995	704.759	759.589	277.15	689.459	730.794	370.973
336	3.35	473.77	1172.38	139.129	400.631	1169.49	90.2781	541.143	1181.83	88.8567	306.302	1040.07	-35.8375	653.669	1036.6	-45.9421	483.409	968.828	41.2918	238.025	689.088	-87.5448	205.763	734.663	185.72	280.013	752.205	184.087	256.929	762.106	261.876	274.627	729.69	361.539	724.961	678.834	-73.4622	753.004	738.191	192.135	683.24	757.701	187.99	704.742	759.588	277.125	689.436	730.797	370.979
337	3.36	473.829	1172.33	139.133	400.653	1169.44	90.2743	541.201	1181.8	88.8635	306.318	1040.06	-35.8414	653.69	1036.6	-45.9649	483.431	968.742	41.1703	238.026	689.104	-87.5403	205.784	734.638	185.716	280.047	752.189	184.102	256.914	762.095	261.873	274.654	729.652	361.548	724.969	678.894	-73.5591	753.013	738.18	192.14	683.244	757.669	187.965	704.745	759.571	277.125	689.431	730.782	370.97
338	3.37	473.938	1172.32	139.23	400.723	1169.42	90.3786	541.253	1181.77	88.8751	306.363	1040.05	-35.8114	653.73	1036.59	-45.9476	483.512	968.698	41.2044	238.017	689.105	-87.5352	205.854	734.637	185.759	280.104	752.179	184.143	256.956	762.095	261.928	274.699	729.637	361.613	724.985	678.951	-73.6555	753.021	738.161	192.173	683.264	757.679	188.02	704.767	759.56	277.157	689.468	730.777	370.995
339	3.38	474.024	1172.28	139.232	400.767	1169.39	90.4219	541.291	1181.76	88.872	306.403	1040.04	-35.7925	653.765	1036.59	-45.9526	483.558	968.643	41.1328	238.027	689.114	-87.5573	205.9	734.626	185.771	280.126	752.149	184.113	257.016	762.083	261.923	274.728	729.64	361.65	725.013	678.987	-73.6858	753.038	738.135	192.178	683.299	757.664	188.032	704.803	759.561	277.158	689.509	730.768	370.979
340	3.39	474.049	1172.21	139.11	400.785	1169.38	90.3959	541.32	1181.75	88.8295	306.416	1040.05	-35.8081	653.775	1036.59	-45.975	483.571	968.628	41.102	238.044	689.101	-87.5675	205.892	734.635	185.744	280.127	752.133	184.079	257.019	762.079	261.863	274.725	729.655	361.622	725.023	678.98	-73.6843	753.049	738.128	192.163	683.322	757.628	187.925	704.813	759.547	277.115	689.537	730.755	370.934
341	3.4	474.031	1172.27	139.229	400.776	1169.39	90.4021	541.32	1181.74	88.8553	306.419	1040.05	-35.79	653.77	1036.59	-46.0006	483.555	968.666	41.1696	238.058	689.082	-87.5552	205.865	734.662	185.731	280.118	752.157	184.113	256.967	762.087	261.858	274.693	729.684	361.572	725.044	678.943	-73.672	753.036	738.133	192.12	683.301	757.655	187.884	704.794	759.55	277.091	689.526	730.758	370.92
342	3.41	473.968	1172.28	139.323	400.745	1169.41	90.4569	541.301	1181.73	88.9371	306.398	1040.05	-35.7659	653.746	1036.57	-45.9464	483.521	968.703	41.2736	238.046	689.05	-87.522	205.82	734.682	185.762	280.06	752.176	184.175	256.91	762.094	261.922	274.647	729.692	361.566	725.039	678.877	-73.6325	753	738.142	192.121	683.265	757.665	187.928	704.765	759.562	277.112	689.476	730.749	370.924
343	3.42	473.975	1172.28	139.394	400.732	1169.4	90.4807	541.309	1181.71	89.0084	306.384	1040.04	-35.7323	653.735	1036.55	-45.9092	483.513	968.699	41.327	238.066	689.023	-87.4928	205.786	734.679	185.773	280.008	752.181	184.155	256.891	762.091	261.946	274.621	729.681	361.541	725.03	678.784	-73.5146	752.988	738.149	192.134	683.241	757.656	187.941	704.756	759.573	277.135	689.459	730.75	370.93
344	3.43	474.023	1172.24	139.388	400.773	1169.4	90.4878	541.351	1181.7	89.0464	306.407	1040.03	-35.7236	653.756	1036.55	-45.92	483.531	968.649	41.2723	238.095	689.032	-87.5221	205.804	734.656	185.74	280.028	752.179	184.082	256.898	762.082	261.859	274.633	729.656	361.518	725.04	678.742	-73.4561	753.02	738.155	192.138	683.263	757.649	187.938	704.766	759.564	277.085	689.486	730.76	370.941
345	3.44	474.097	1172.2	139.351	400.821	1169.4	90.4728	541.397	1181.7	89.0079	306.43	1040.04	-35.735	653.774	1036.56	-45.942	483.562	968.598	41.179	238.098	689.057	-87.5596	205.838	734.651	185.696	280.06	752.163	184.027	256.931	762.106	261.789	274.657	729.646	361.503	725.035	678.765	-73.4809	753.042	738.169	192.105	683.291	757.66	187.892	704.787	759.567	277.05	689.508	730.768	370.899
346	3.45	474.118	1172.12	139.282	400.853	1169.38	90.502	541.419	1181.68	89.0475	306.44	1040.04	-35.7144	653.782	1036.56	-45.9273	483.582	968.563	41.1436	238.09	689.076	-87.5699	205.868	734.649	185.706	280.062	752.162	184.039	256.937	762.119	261.785	274.648	729.654	361.5	725.037	678.804	-73.5245	753.037	738.166	192.128	683.279	757.658	187.893	704.794	759.571	277.07	689.506	730.772	370.916
347	3.46	474.105	1172.06	139.315	400.843	1169.35	90.5486	541.428	1181.63	89.156	306.44	1040.02	-35.6829	653.785	1036.53	-45.8679	483.588	968.539	41.231	238.094	689.087	-87.5737	205.869	734.627	185.755	280.062	752.133	184.072	256.915	762.086	261.874	274.64	729.634	361.537	725.052	678.85	-73.5606	753.03	738.151	192.168	683.268	757.627	187.962	704.783	759.562	277.143	689.483	730.766	370.99
348	3.47	474.098	1172.08	139.465	400.836	1169.33	90.5765	541.416	1181.59	89.2371	306.439	1040.02	-35.6676	653.787	1036.5	-45.8409	483.593	968.501	41.2521	238.107	689.076	-87.5754	205.836	734.62	185.766	280.044	752.122	184.07	256.882	762.063	261.939	274.65	729.624	361.551	725.054	678.858	-73.557	753.022	738.13	192.184	683.259	757.634	188.05	704.752	759.573	277.189	689.457	730.78	371.024
349	3.48	474.101	1172.12	139.499	400.829	1169.33	90.5707	541.404	1181.6	89.2001	306.432	1040.01	-35.6602	653.77	1036.5	-45.8799	483.566	968.496	41.1776	238.095	689.074	-87.5734	205.789	734.635	185.737	280.008	752.13	184.032	256.854	762.076	261.916	274.642	729.63	361.539	725.037	678.878	-73.6485	753.004	738.137	192.131	683.229	757.652	187.985	704.719	759.56	277.153	689.42	730.781	370.971
350	3.49	474.155	1172.14	139.593	400.852	1169.34	90.6039	541.422	1181.6	89.1912	306.44	1040.01	-35.6586	653.776	1036.51	-45.8891	483.561	968.509	41.2031	238.089	689.075	-87.5909	205.806	734.651	185.75	280.009	752.141	184.043	256.868	762.065	261.878	274.621	729.649	361.517	725.042	678.851	-73.6488	753	738.154	192.11	683.228	757.652	187.904	704.719	759.56	277.119	689.414	730.783	370.973
351	3.5	474.251	1172.13	139.701	400.905	1169.35	90.6361	541.482	1181.6	89.2429	306.477	1040	-35.6414	653.825	1036.5	-45.8603	483.616	968.503	41.2604	238.127	689.047	-87.5715	205.858	734.663	185.79	280.072	752.152	184.103	256.952	762.06	261.864	274.65	729.663	361.555	725.058	678.771	-73.5175	753.011	738.159	192.108	683.276	757.667	187.967	704.782	759.577	277.108	689.455	730.785	371
352	3.51	474.298	1172.11	139.715	400.942	1169.35	90.636	541.528	1181.6	89.2168	306.507	1040	-35.6532	653.856	1036.5	-45.8705	483.668	968.487	41.2553	238.145	689.043	-87.5711	205.879	734.659	185.769	280.101	752.15	184.092	257.001	762.062	261.824	274.673	729.667	361.561	725.052	678.746	-73.5113	753.028	738.146	192.095	683.298	757.655	187.961	704.815	759.567	277.079	689.483	730.772	370.956
353	3.52	474.273	1172.08	139.589	400.934	1169.33	90.5921	541.541	1181.58	89.2396	306.508	1039.99	-35.6742	653.864	1036.49	-45.8786	483.659	968.479	41.1924	238.161	689.049	-87.5809	205.86	734.653	185.718	280.067	752.144	184.046	256.953	762.043	261.765	274.653	729.667	361.514	725.047	678.746	-73.548	753.029	738.148	192.133	683.279	757.616	187.849	704.797	759.554	277.08	689.475	730.742	370.887
354	3.53	474.263	1172.05	139.595	400.933	1169.33	90.658	541.533	1181.56	89.3611	306.516	1039.99	-35.6407	653.869	1036.48	-45.8348	483.643	968.45	41.2115	238.164	689.062	-87.5633	205.843	734.643	185.754	280.058	752.162	184.092	256.918	762.047	261.869	274.638	729.649	361.539	725.054	678.761	-73.5752	753.024	738.142	192.179	683.253	757.617	187.855	704.777	759.553	277.131	689.447	730.748	370.927
355	3.54	474.296	1172.06	139.705	400.957	1169.33	90.7427	541.541	1181.55	89.4428	306.534	1040	-35.6118	653.879	1036.48	-45.7759	483.679	968.463	41.3236	238.162	689.064	-87.5465	205.861	734.643	185.828	280.085	752.17	184.163	256.929	762.081	261.984	274.661	729.647	361.605	725.05	678.739	-73.5068	753.024	738.141	192.203	683.271	757.644	187.964	704.79	759.569	277.212	689.452	730.76	371.004
356	3.55	474.312	1172.02	139.634	400.971	1169.33	90.7217	541.573	1181.53	89.3914	306.539	1040	-35.6224	653.871	1036.47	-45.8078	483.692	968.431	41.2134	238.166	689.065	-87.5573	205.863	734.637	185.791	280.097	752.153	184.134	256.948	762.097	261.955	274.679	729.642	361.608	725.032	678.742	-73.53	753.035	738.141	192.19	683.287	757.639	187.963	704.796	759.576	277.177	689.469	730.757	370.972
357	3.56	474.313	1172.01	139.491	400.969	1169.33	90.6621	541.609	1181.52	89.3117	306.528	1039.99	-35.6484	653.859	1036.47	-45.8524	483.669	968.351	41.0302	238.153	689.059	-87.572	205.849	734.634	185.713	280.106	752.141	184.08	256.943	762.089	261.84	274.669	729.639	361.562	724.997	678.736	-73.5537	753.06	738.157	192.118	683.292	757.617	187.868	704.805	759.553	277.069	689.484	730.749	370.91
358	3.57	474.327	1172.04	139.548	400.996	1169.33	90.6755	541.618	1181.54	89.3247	306.528	1039.99	-35.6358	653.859	1036.45	-45.8475	483.681	968.353	41.0999	238.167	689.041	-87.5367	205.856	734.627	185.712	280.116	752.144	184.069	256.936	762.081	261.791	274.677	729.641	361.568	724.973	678.712	-73.5406	753.048	738.161	192.102	683.301	757.633	187.877	704.809	759.545	277.054	689.495	730.761	370.926
359	3.58	474.311	1172.06	139.657	401	1169.34	90.7442	541.599	1181.53	89.3625	306.526	1040	-35.613	653.847	1036.44	-45.8202	483.678	968.417	41.2404	238.166	689.049	-87.5591	205.858	734.639	185.78	280.107	752.171	184.112	256.938	762.1	261.872	274.677	729.656	361.589	724.976	678.679	-73.5073	753.015	738.155	192.087	683.278	757.656	187.956	704.793	759.567	277.102	689.472	730.783	370.953
360	3.59	474.246	1172.03	139.591	400.952	1169.34	90.7128	541.561	1181.52	89.3706	306.501	1039.98	-35.6223	653.825	1036.44	-45.8326	483.626	968.443	41.2652	238.165	689.055	-87.6038	205.809	734.657	185.751	280.054	752.163	184.077	256.877	762.078	261.882	274.635	729.667	361.553	724.988	678.686	-73.5682	752.971	738.143	192.101	683.215	757.67	187.936	704.739	759.565	277.107	689.427	730.782	370.942
361	3.6	474.242	1172.02	139.575	400.925	1169.33	90.6777	541.572	1181.5	89.4042	306.486	1039.97	-35.6182	653.823	1036.42	-45.8466	483.608	968.413	41.1912	238.186	689.04	-87.6286	205.772	734.668	185.69	280.012	752.153	184.057	256.837	762.062	261.861	274.606	729.674	361.52	725.013	678.69	-73.5776	752.978	738.15	192.115	683.202	757.654	187.896	704.716	759.553	277.065	689.41	730.766	370.953
362	3.61	474.314	1172.03	139.743	400.959	1169.33	90.7286	541.605	1181.49	89.4354	306.508	1039.98	-35.6155	653.845	1036.41	-45.835	483.651	968.384	41.1867	238.214	689.029	-87.6118	205.802	734.661	185.725	280.029	752.16	184.081	256.882	762.074	261.889	274.624	729.674	361.531	725.036	678.695	-73.5902	752.996	738.157	192.113	683.244	757.647	187.92	704.745	759.547	277.103	689.435	730.766	370.95
363	3.62	474.346	1172.04	139.755	401	1169.34	90.7555	541.64	1181.48	89.4382	306.54	1039.97	-35.5923	653.868	1036.42	-45.8353	483.682	968.355	41.1384	238.227	689.021	-87.586	205.847	734.641	185.773	280.064	752.142	184.101	256.938	762.067	261.865	274.645	729.662	361.525	725.043	678.716	-73.5882	753.024	738.16	192.131	683.293	757.641	187.942	704.774	759.555	277.121	689.481	730.772	370.943
364	3.63	474.352	1172	139.635	401.011	1169.33	90.7177	541.65	1181.47	89.4097	306.539	1039.96	-35.6077	653.873	1036.42	-45.8359	483.716	968.317	41.0691	238.205	689.011	-87.5317	205.863	734.628	185.73	280.081	752.106	184.041	256.941	762.051	261.817	274.643	729.647	361.489	725.032	678.708	-73.5346	753.064	738.148	192.13	683.296	757.622	187.891	704.801	759.55	277.094	689.508	730.742	370.89
365	3.64	474.351	1171.94	139.485	401.003	1169.32	90.6912	541.666	1181.46	89.3914	306.53	1039.95	-35.6099	653.864	1036.41	-45.8739	483.729	968.28	41.06	238.192	688.998	-87.5187	205.85	734.612	185.707	280.064	752.097	184.004	256.904	762.052	261.788	274.636	729.637	361.477	725.005	678.681	-73.5006	753.075	738.139	192.134	683.296	757.613	187.847	704.806	759.548	277.074	689.505	730.72	370.864
366	3.65	474.359	1171.97	139.609	401.007	1169.32	90.7315	541.648	1181.46	89.3942	306.527	1039.94	-35.5892	653.85	1036.4	-45.8792	483.717	968.29	41.119	238.195	688.981	-87.5526	205.838	734.613	185.728	280.079	752.121	184.051	256.897	762.086	261.886	274.641	729.638	361.5	724.981	678.648	-73.4942	753.045	738.138	192.133	683.292	757.629	187.89	704.796	759.555	277.109	689.476	730.746	370.919
367	3.66	474.35	1172.01	139.677	401.01	1169.33	90.7495	541.61	1181.46	89.3912	306.518	1039.93	-35.5928	653.834	1036.4	-45.8743	483.696	968.3	41.1611	238.181	688.981	-87.5786	205.827	734.618	185.741	280.065	752.129	184.074	256.908	762.072	261.933	274.645	729.64	361.534	724.958	678.627	-73.4743	753.014	738.129	192.125	683.282	757.66	187.923	704.783	759.569	277.117	689.454	730.76	370.951
368	3.67	474.353	1172.03	139.661	401.017	1169.31	90.7357	541.626	1181.47	89.3761	306.521	1039.93	-35.6144	653.841	1036.41	-45.8995	483.691	968.288	41.085	238.18	688.973	-87.5697	205.826	734.627	185.713	280.066	752.134	184.089	256.941	762.054	261.889	274.647	729.642	361.534	724.945	678.608	-73.4578	753.027	738.12	192.097	683.272	757.679	187.928	704.798	759.563	277.058	689.474	730.763	370.922
369	3.68	474.383	1172.02	139.601	401.032	1169.3	90.7091	541.66	1181.48	89.3396	306.535	1039.94	-35.6242	653.855	1036.41	-45.916	483.704	968.254	40.9862	238.185	688.979	-87.5665	205.867	734.638	185.724	280.097	752.145	184.08	256.97	762.064	261.819	274.662	729.638	361.53	724.937	678.619	-73.498	753.035	738.13	192.075	683.299	757.661	187.916	704.813	759.553	277.043	689.494	730.777	370.907
370	3.69	474.347	1171.97	139.546	401.041	1169.29	90.7123	541.65	1181.48	89.3284	306.537	1039.93	-35.6317	653.854	1036.41	-45.9218	483.701	968.252	41.0087	238.184	688.999	-87.6147	205.893	734.643	185.758	280.092	752.154	184.045	256.974	762.065	261.785	274.679	729.647	361.54	724.932	678.681	-73.6046	753.013	738.144	192.096	683.281	757.661	187.895	704.794	759.562	277.053	689.471	730.776	370.933
371	3.7	474.313	1171.94	139.56	401.013	1169.29	90.7191	541.628	1181.47	89.4004	306.525	1039.92	-35.6305	653.836	1036.41	-45.9041	483.675	968.236	40.9989	238.18	689.019	-87.6298	205.881	734.647	185.758	280.063	752.129	184.039	256.941	762.042	261.801	274.675	729.661	361.555	724.938	678.706	-73.6292	752.999	738.146	192.142	683.247	757.644	187.901	704.774	759.562	277.091	689.446	730.774	370.951
372	3.71	474.289	1171.91	139.549	400.984	1169.3	90.7262	541.63	1181.43	89.4302	306.521	1039.91	-35.6228	653.836	1036.38	-45.8847	483.675	968.212	41.0162	238.194	688.988	-87.5659	205.86	734.634	185.767	280.051	752.113	184.041	256.906	762.043	261.874	274.675	729.668	361.583	724.95	678.683	-73.5982	753.018	738.119	192.195	683.255	757.618	187.932	704.783	759.542	277.115	689.453	730.755	370.949
373	3.72	474.312	1171.91	139.556	400.988	1169.31	90.7533	541.635	1181.43	89.4079	306.524	1039.9	-35.6459	653.832	1036.38	-45.8914	483.708	968.219	41.0042	238.191	688.96	-87.5285	205.859	734.617	185.76	280.06	752.123	184.066	256.903	762.077	261.905	274.668	729.673	361.563	724.934	678.638	-73.547	753.037	738.104	192.16	683.271	757.611	187.914	704.795	759.532	277.12	689.475	730.733	370.911
374	3.73	474.328	1171.92	139.563	400.994	1169.32	90.7333	541.634	1181.42	89.3718	306.525	1039.9	-35.6699	653.827	1036.38	-45.9182	483.698	968.197	40.8835	238.203	688.924	-87.5081	205.851	734.609	185.71	280.08	752.129	184.06	256.905	762.112	261.855	274.643	729.662	361.493	724.894	678.577	-73.4778	753.044	738.116	192.11	683.286	757.611	187.837	704.802	759.548	277.113	689.494	730.738	370.882
375	3.74	474.298	1171.9	139.481	400.989	1169.32	90.7251	541.639	1181.42	89.363	306.516	1039.88	-35.6715	653.817	1036.36	-45.9399	483.679	968.161	40.8488	238.206	688.898	-87.4895	205.831	734.602	185.671	280.115	752.129	184.078	256.935	762.109	261.84	274.637	729.655	361.47	724.859	678.513	-73.3923	753.048	738.118	192.087	683.303	757.627	187.881	704.819	759.542	277.077	689.509	730.742	370.894
376	3.75	474.302	1171.91	139.609	400.976	1169.3	90.719	541.621	1181.43	89.3475	306.505	1039.87	-35.6905	653.803	1036.35	-45.9271	483.679	968.166	40.8675	238.184	688.871	-87.5033	205.831	734.608	185.693	280.098	752.124	184.076	256.937	762.09	261.832	274.609	729.651	361.456	724.828	678.468	-73.3077	753.038	738.121	192.051	683.297	757.639	187.886	704.814	759.548	277.049	689.508	730.748	370.896
377	3.76	474.242	1171.93	139.515	400.936	1169.3	90.6684	541.581	1181.44	89.3522	306.485	1039.88	-35.7263	653.772	1036.36	-45.9403	483.647	968.2	40.9026	238.18	688.886	-87.5611	205.809	734.638	185.678	280.039	752.132	184.023	256.903	762.085	261.783	274.592	729.668	361.438	724.827	678.512	-73.3737	753.004	738.133	192.041	683.252	757.66	187.842	704.779	759.552	277.03	689.487	730.768	370.867
378	3.77	474.182	1171.98	139.517	400.893	1169.3	90.6554	541.542	1181.43	89.3374	306.461	1039.89	-35.7464	653.752	1036.37	-45.9585	483.596	968.232	40.9056	238.201	688.911	-87.5953	205.767	734.659	185.657	279.993	752.148	183.999	256.842	762.09	261.774	274.587	729.68	361.439	724.86	678.574	-73.4793	752.986	738.132	192.086	683.212	757.676	187.851	704.742	759.546	277.054	689.452	730.782	370.884
379	3.78	474.197	1172.01	139.677	400.897	1169.31	90.7362	541.515	1181.41	89.3961	306.462	1039.89	-35.7089	653.76	1036.37	-45.9172	483.593	968.222	40.9563	238.231	688.899	-87.5821	205.789	734.65	185.754	280.023	752.147	184.064	256.838	762.079	261.869	274.616	729.687	361.516	724.904	678.636	-73.5586	752.966	738.125	192.154	683.219	757.691	187.963	704.741	759.553	277.148	689.433	730.772	370.965
380	3.79	474.245	1172	139.696	400.94	1169.3	90.7974	541.525	1181.4	89.3881	306.491	1039.88	-35.6772	653.777	1036.38	-45.8901	483.635	968.178	40.9472	238.235	688.897	-87.5691	205.853	734.638	185.812	280.069	752.136	184.103	256.902	762.076	261.976	274.659	729.68	361.567	724.926	678.675	-73.6085	752.984	738.105	192.146	683.263	757.682	187.965	704.777	759.558	277.173	689.487	730.765	370.95
381	3.8	474.317	1171.94	139.55	400.953	1169.28	90.7173	541.567	1181.39	89.3582	306.513	1039.87	-35.7043	653.794	1036.39	-45.9193	483.681	968.129	40.8275	238.24	688.893	-87.551	205.885	734.633	185.732	280.106	752.094	184.039	256.941	762.061	261.844	274.692	729.674	361.53	724.935	678.716	-73.6527	753.052	738.108	192.071	683.314	757.637	187.84	704.836	759.557	277.07	689.545	730.749	370.865
382	3.81	474.321	1171.85	139.388	400.953	1169.25	90.6264	541.612	1181.4	89.3505	306.502	1039.85	-35.7311	653.806	1036.38	-45.953	483.682	968.091	40.6917	238.245	688.885	-87.5269	205.901	734.616	185.658	280.122	752.052	183.974	256.964	762.051	261.718	274.678	729.656	361.498	724.934	678.696	-73.6035	753.104	738.119	192.057	683.33	757.595	187.745	704.868	759.548	277.001	689.56	730.708	370.804
383	3.82	474.29	1171.84	139.479	400.945	1169.25	90.6822	541.59	1181.41	89.3749	306.482	1039.83	-35.7028	653.789	1036.37	-45.9404	483.67	968.086	40.7394	238.236	688.877	-87.5348	205.887	734.6	185.675	280.127	752.065	184.029	256.971	762.039	261.718	274.664	729.642	361.535	724.907	678.641	-73.5247	753.081	738.141	192.093	683.312	757.608	187.839	704.848	759.546	277.054	689.548	730.729	370.849
384	3.83	474.224	1171.9	139.628	400.899	1169.25	90.7227	541.522	1181.44	89.4163	306.447	1039.82	-35.6776	653.727	1036.36	-45.9263	483.607	968.134	40.8636	238.236	688.845	-87.5412	205.829	734.619	185.706	280.081	752.101	184.059	256.92	762.031	261.786	274.629	729.641	361.538	724.88	678.591	-73.4691	753.029	738.162	192.126	683.254	757.638	187.934	704.797	759.542	277.097	689.497	730.762	370.895
385	3.84	474.16	1171.92	139.608	400.848	1169.26	90.7188	541.488	1181.44	89.5018	306.413	1039.81	-35.6751	653.685	1036.35	-45.9228	483.545	968.149	40.8734	238.244	688.812	-87.5405	205.739	734.616	185.643	280.004	752.103	184.011	256.828	762.038	261.778	274.576	729.643	361.471	724.87	678.542	-73.4162	753.01	738.139	192.144	683.219	757.655	187.906	704.761	759.54	277.078	689.449	730.759	370.878
386	3.85	474.2	1171.96	139.803	400.854	1169.24	90.7768	541.482	1181.4	89.5132	306.406	1039.81	-35.6436	653.696	1036.36	-45.8974	483.555	968.144	40.8839	238.249	688.798	-87.5408	205.739	734.617	185.657	279.992	752.106	184.001	256.823	762.062	261.792	274.585	729.651	361.461	724.87	678.526	-73.3956	753.006	738.112	192.147	683.222	757.658	187.906	704.769	759.544	277.1	689.454	730.733	370.865
387	3.86	474.283	1172.01	139.995	400.917	1169.24	90.868	541.485	1181.38	89.5081	306.451	1039.81	-35.5987	653.736	1036.38	-45.8785	483.639	968.148	41.0368	238.253	688.819	-87.5631	205.818	734.63	185.732	280.06	752.136	184.06	256.931	762.089	261.844	274.638	729.679	361.536	724.859	678.56	-73.4392	753.017	738.099	192.113	683.264	757.663	187.95	704.821	759.561	277.128	689.508	730.739	370.92
388	3.87	474.329	1171.98	139.927	400.952	1169.24	90.9038	541.522	1181.36	89.4619	306.493	1039.82	-35.6044	653.776	1036.39	-45.8988	483.709	968.079	40.9436	238.257	688.834	-87.5837	205.894	734.609	185.736	280.15	752.123	184.068	257.014	762.082	261.825	274.692	729.696	361.556	724.851	678.609	-73.5405	753.043	738.095	192.061	683.308	757.624	187.892	704.873	759.563	277.087	689.553	730.738	370.916
389	3.88	474.291	1171.81	139.575	400.927	1169.2	90.8319	541.557	1181.32	89.4278	306.491	1039.8	-35.6119	653.782	1036.38	-45.9345	483.709	967.971	40.7132	238.268	688.839	-87.579	205.904	734.584	185.677	280.157	752.081	184.001	256.979	762.061	261.737	274.697	729.66	361.517	724.88	678.656	-73.639	753.062	738.071	192.035	683.317	757.584	187.807	704.875	759.519	277.01	689.555	730.713	370.853
390	3.89	474.257	1171.77	139.564	400.897	1169.17	90.8306	541.529	1181.31	89.4541	306.462	1039.79	-35.6192	653.766	1036.37	-45.9095	483.677	967.947	40.7042	238.273	688.849	-87.5905	205.886	734.58	185.688	280.121	752.06	183.999	256.928	762.043	261.732	274.669	729.64	361.503	724.899	678.692	-73.6871	753.044	738.082	192.041	683.282	757.569	187.807	704.836	759.51	277.013	689.513	730.715	370.836
391	3.9	474.212	1171.83	139.804	400.881	1169.17	90.8963	541.488	1181.32	89.5695	306.432	1039.77	-35.5725	653.722	1036.36	-45.8671	483.637	968.011	40.8966	238.27	688.872	-87.6195	205.846	734.601	185.735	280.067	752.079	184.035	256.883	762.036	261.777	274.629	729.653	361.49	724.883	678.679	-73.6446	753.004	738.133	192.091	683.229	757.602	187.883	704.779	759.527	277.08	689.467	730.754	370.893
392	3.91	474.159	1171.83	139.902	400.843	1169.17	90.903	541.478	1181.33	89.6928	306.416	1039.75	-35.54	653.691	1036.35	-45.8386	483.595	968.023	40.9344	238.279	688.864	-87.6114	205.78	734.623	185.693	280.016	752.122	184.012	256.85	762.028	261.797	274.583	729.665	361.466	724.862	678.612	-73.5428	752.993	738.16	192.109	683.192	757.646	187.897	704.744	759.545	277.106	689.448	730.77	370.903
393	3.92	474.169	1171.82	139.902	400.848	1169.18	90.9429	541.501	1181.33	89.7659	306.415	1039.78	-35.5316	653.693	1036.35	-45.8404	483.598	968.021	40.8928	238.271	688.829	-87.5753	205.755	734.645	185.638	280.006	752.16	184.012	256.872	762.042	261.766	274.572	729.687	361.451	724.872	678.562	-73.4397	752.996	738.183	192.115	683.203	757.659	187.867	704.763	759.558	277.119	689.455	730.797	370.89
394	3.93	474.286	1171.86	140.055	400.919	1169.18	91.0593	541.537	1181.31	89.7665	306.446	1039.8	-35.5032	653.723	1036.37	-45.8328	483.648	968.062	41.0033	238.269	688.823	-87.5902	205.797	734.665	185.661	280.067	752.178	184.047	256.936	762.104	261.784	274.59	729.715	361.44	724.871	678.54	-73.4174	753.004	738.193	192.089	683.246	757.672	187.833	704.81	759.594	277.104	689.484	730.824	370.905
395	3.94	474.339	1171.82	140.102	400.96	1169.17	91.1213	541.576	1181.25	89.7991	306.472	1039.8	-35.4762	653.757	1036.35	-45.7988	483.694	968.025	41.0072	238.276	688.811	-87.559	205.824	734.647	185.665	280.1	752.163	184.054	256.946	762.105	261.775	274.621	729.694	361.459	724.873	678.519	-73.4234	753.019	738.153	192.088	683.276	757.668	187.853	704.842	759.588	277.081	689.514	730.788	370.89
396	3.95	474.348	1171.72	140.094	400.959	1169.11	91.1526	541.607	1181.16	89.8932	306.472	1039.78	-35.4755	653.774	1036.33	-45.7562	483.716	967.914	40.9022	238.28	688.789	-87.5029	205.827	734.58	185.658	280.096	752.104	184.058	256.901	762.053	261.768	274.631	729.647	361.485	724.881	678.513	-73.4244	753.025	738.086	192.136	683.285	757.614	187.884	704.834	759.543	277.058	689.519	730.731	370.884
397	3.96	474.337	1171.61	139.999	400.972	1169.05	91.1922	541.615	1181.12	89.9537	306.479	1039.76	-35.4471	653.778	1036.3	-45.7365	483.724	967.855	40.9165	238.251	688.802	-87.5171	205.837	734.548	185.682	280.091	752.046	184.035	256.879	762.02	261.813	274.638	729.616	361.514	724.879	678.548	-73.5112	753.031	738.047	192.125	683.274	757.563	187.897	704.819	759.505	277.034	689.509	730.705	370.904
398	3.97	474.398	1171.57	140.07	401.015	1169.03	91.2521	541.639	1181.11	89.9074	306.505	1039.75	-35.4151	653.791	1036.31	-45.7709	483.737	967.845	40.9366	238.242	688.826	-87.5574	205.852	734.565	185.684	280.085	752.038	184.035	256.876	762.026	261.806	274.648	729.627	361.515	724.868	678.572	-73.5925	753.034	738.078	192.057	683.278	757.565	187.865	704.819	759.508	277.016	689.518	730.701	370.878
399	3.98	474.417	1171.52	140.057	401.04	1169.02	91.2346	541.672	1181.11	89.9293	306.508	1039.75	-35.4294	653.803	1036.3	-45.7913	483.739	967.856	40.9247	238.246	688.855	-87.5955	205.844	734.588	185.668	280.063	752.051	183.995	256.891	762.032	261.738	274.644	729.651	361.504	724.868	678.574	-73.5774	753.028	738.107	192.043	683.261	757.593	187.808	704.802	759.504	277.001	689.512	730.721	370.855
400	3.99	474.408	1171.51	140.023	401.051	1169.03	91.2474	541.681	1181.13	89.9896	306.51	1039.76	-35.4188	653.81	1036.3	-45.7887	483.73	967.874	40.956	238.253	688.865	-87.5971	205.833	734.623	185.696	280.067	752.079	184.002	256.917	762.022	261.741	274.635	729.675	361.511	724.859	678.562	-73.5303	753.021	738.139	192.088	683.241	757.628	187.882	704.79	759.519	277.066	689.486	730.762	370.896
401	4	474.454	1171.54	140.107	401.071	1169.05	91.3157	541.698	1181.16	90.0207	306.524	1039.78	-35.4126	653.819	1036.3	-45.7777	483.712	967.91	41.0264	238.243	688.876	-87.6088	205.819	734.649	185.701	280.065	752.123	184.035	256.937	762.056	261.786	274.629	729.685	361.479	724.835	678.559	-73.5393	753.002	738.16	192.094	683.226	757.662	187.933	704.787	759.567	277.113	689.477	730.804	370.932
402	4.01	474.475	1171.54	140.164	401.088	1169.1	91.3458	541.727	1181.17	90.0445	306.516	1039.79	-35.4163	653.812	1036.3	-45.7841	483.714	967.921	41.0198	238.249	688.886	-87.6083	205.777	734.654	185.651	280.039	752.149	184.027	256.892	762.102	261.8	274.623	729.696	361.449	724.82	678.54	-73.5275	752.983	738.175	192.104	683.199	757.677	187.896	704.781	759.603	277.119	689.465	730.831	370.951
403	4.02	474.549	1171.58	140.312	401.11	1169.09	91.361	541.75	1181.13	90.1175	306.519	1039.78	-35.3903	653.812	1036.28	-45.7632	483.721	967.881	40.9948	238.241	688.892	-87.5974	205.757	734.633	185.669	280.032	752.146	184.028	256.881	762.113	261.863	274.619	729.673	361.494	724.814	678.519	-73.4742	752.974	738.159	192.156	683.207	757.655	187.884	704.773	759.606	277.166	689.453	730.812	370.965
404	4.03	474.647	1171.61	140.398	401.177	1169.08	91.4106	541.811	1181.1	90.1465	306.551	1039.77	-35.3552	653.855	1036.27	-45.7314	483.759	967.854	40.9971	238.231	688.871	-87.5666	205.804	734.623	185.731	280.068	752.146	184.048	256.92	762.112	261.929	274.637	729.667	361.523	724.806	678.467	-73.3996	752.995	738.128	192.155	683.253	757.648	187.933	704.811	759.604	277.16	689.493	730.782	370.946
405	4.04	474.724	1171.57	140.247	401.251	1169.07	91.4231	541.886	1181.08	90.0343	306.578	1039.77	-35.4058	653.883	1036.25	-45.768	483.822	967.828	40.9266	238.229	688.834	-87.5224	205.84	734.629	185.696	280.103	752.138	184.016	256.941	762.131	261.888	274.646	729.677	361.519	724.8	678.413	-73.3721	753.033	738.121	192.076	683.289	757.635	187.892	704.86	759.598	277.077	689.535	730.761	370.872
406	4.05	474.758	1171.5	140.099	401.278	1169.06	91.3972	541.938	1181.04	89.9428	306.589	1039.76	-35.4528	653.898	1036.23	-45.7957	483.815	967.783	40.7859	238.23	688.826	-87.5456	205.829	734.618	185.612	280.103	752.13	183.978	256.939	762.112	261.809	274.631	729.674	361.476	724.796	678.416	-73.4432	753.049	738.113	192.046	683.288	757.601	187.812	704.856	759.578	277.016	689.553	730.734	370.806
407	4.06	474.741	1171.51	140.136	401.285	1169.03	91.4043	541.933	1181.03	89.9723	306.596	1039.74	-35.4511	653.907	1036.22	-45.8077	483.809	967.785	40.8667	238.258	688.821	-87.5556	205.828	734.614	185.63	280.102	752.11	184.013	256.924	762.082	261.802	274.631	729.656	361.48	724.806	678.401	-73.4685	753.033	738.109	192.06	683.268	757.598	187.84	704.832	759.554	277.052	689.526	730.73	370.856
408	4.07	474.727	1171.54	140.231	401.286	1169.03	91.3882	541.914	1181.06	90.0132	306.601	1039.73	-35.4305	653.899	1036.22	-45.8221	483.803	967.834	40.975	238.265	688.805	-87.5537	205.828	734.634	185.708	280.067	752.121	184.034	256.898	762.042	261.844	274.617	729.655	361.504	724.809	678.395	-73.4856	753.007	738.138	192.051	683.235	757.632	187.885	704.799	759.538	277.079	689.491	730.754	370.91
409	4.08	474.684	1171.55	140.156	401.263	1169.04	91.3154	541.902	1181.08	89.9709	306.595	1039.73	-35.4629	653.891	1036.23	-45.8611	483.77	967.835	40.9217	238.247	688.84	-87.5765	205.791	734.654	185.683	280.016	752.117	183.973	256.86	762.029	261.775	274.601	729.678	361.485	724.796	678.426	-73.4952	752.984	738.168	192.03	683.196	757.651	187.819	704.763	759.526	277.033	689.451	730.757	370.872
410	4.09	474.653	1171.51	140.042	401.251	1169.03	91.2511	541.91	1181.09	89.9385	306.59	1039.75	-35.4937	653.892	1036.22	-45.8661	483.758	967.789	40.779	238.242	688.886	-87.6127	205.765	734.66	185.636	279.988	752.087	183.931	256.843	762.024	261.678	274.588	729.691	361.465	724.796	678.483	-73.5559	752.969	738.174	192.031	683.183	757.637	187.769	704.744	759.526	277.003	689.425	730.753	370.853
411	4.1	474.747	1171.53	140.212	401.293	1169.03	91.2776	541.933	1181.09	89.9656	306.62	1039.75	-35.4561	653.922	1036.22	-45.8071	483.781	967.774	40.7941	238.252	688.888	-87.6066	205.805	734.646	185.706	280.037	752.086	184.03	256.895	762.041	261.77	274.61	729.675	361.502	724.807	678.512	-73.5987	752.972	738.162	192.058	683.208	757.641	187.862	704.774	759.556	277.086	689.447	730.767	370.916
412	4.11	474.845	1171.54	140.248	401.35	1169.03	91.3075	541.987	1181.08	89.963	306.663	1039.76	-35.462	653.96	1036.23	-45.8263	483.841	967.771	40.8266	238.259	688.883	-87.5974	205.852	734.615	185.727	280.104	752.086	184.062	256.95	762.062	261.879	274.64	729.658	361.505	724.832	678.503	-73.5721	753.005	738.152	192.075	683.254	757.661	187.906	704.83	759.597	277.128	689.492	730.79	370.943
413	4.12	474.883	1171.52	140.078	401.378	1169.03	91.225	542.045	1181.08	89.9153	306.686	1039.78	-35.5297	653.986	1036.23	-45.8855	483.88	967.749	40.7165	238.255	688.882	-87.6033	205.857	734.588	185.662	280.132	752.084	184.017	256.957	762.079	261.831	274.654	729.649	361.462	724.832	678.493	-73.5211	753.041	738.142	192.091	683.297	757.636	187.857	704.862	759.608	277.071	689.523	730.776	370.895
414	4.13	474.886	1171.55	139.995	401.39	1169.06	91.1875	542.078	1181.09	89.8556	306.691	1039.77	-35.5588	654.001	1036.23	-45.9212	483.898	967.756	40.6579	238.27	688.848	-87.5694	205.838	734.594	185.628	280.119	752.108	183.995	256.956	762.101	261.761	274.646	729.659	361.445	724.847	678.436	-73.431	753.061	738.137	192.117	683.307	757.639	187.823	704.882	759.605	277.028	689.546	730.762	370.849
415	4.14	474.873	1171.65	140.122	401.394	1169.1	91.2148	542.073	1181.12	89.851	306.688	1039.77	-35.5468	653.994	1036.23	-45.9142	483.894	967.81	40.7372	238.297	688.784	-87.5135	205.838	734.626	185.693	280.112	752.135	184.03	256.943	762.105	261.809	274.623	729.678	361.474	724.861	678.357	-73.3473	753.04	738.143	192.111	683.296	757.662	187.898	704.875	759.611	277.064	689.523	730.77	370.894
416	4.15	474.818	1171.69	140.151	401.358	1169.12	91.185	542.029	1181.16	89.8176	306.66	1039.76	-35.5615	653.957	1036.21	-45.9534	483.854	967.831	40.7713	238.301	688.772	-87.5289	205.795	734.662	185.717	280.066	752.149	184.029	256.888	762.083	261.834	274.592	729.693	361.485	724.852	678.339	-73.3686	753.009	738.155	192.081	683.25	757.665	187.911	704.823	759.585	277.068	689.463	730.775	370.896
417	4.16	474.77	1171.61	139.932	401.318	1169.12	91.0736	542.018	1181.16	89.7517	306.642	1039.74	-35.6041	653.952	1036.21	-46.0196	483.809	967.789	40.669	238.32	688.776	-87.5694	205.758	734.659	185.676	280.002	752.126	183.948	256.851	762.047	261.771	274.574	729.684	361.469	724.846	678.334	-73.4087	752.999	738.146	192.074	683.207	757.631	187.835	704.785	759.536	277.026	689.421	730.746	370.856
418	4.17	474.796	1171.61	139.923	401.35	1169.12	91.0534	542.047	1181.15	89.7006	306.669	1039.73	-35.6312	653.978	1036.2	-46.0421	483.812	967.767	40.6232	238.371	688.786	-87.5988	205.777	734.646	185.642	280.025	752.122	183.962	256.855	762.046	261.715	274.591	729.665	361.449	724.879	678.329	-73.4549	753.028	738.134	192.038	683.236	757.617	187.825	704.794	759.511	277.005	689.427	730.737	370.857
419	4.18	474.884	1171.67	140.05	401.409	1169.14	91.1028	542.08	1181.15	89.6245	306.705	1039.73	-35.6126	654.01	1036.22	-46.0414	483.862	967.771	40.6574	238.376	688.804	-87.6158	205.843	734.635	185.685	280.073	752.117	184.022	256.903	762.093	261.808	274.632	729.677	361.475	724.886	678.399	-73.578	753.042	738.128	192.011	683.273	757.633	187.88	704.819	759.534	277.026	689.458	730.752	370.855
420	4.19	474.95	1171.65	139.99	401.454	1169.15	91.1308	542.115	1181.14	89.6103	306.716	1039.75	-35.6156	654.02	1036.22	-46.0477	483.888	967.751	40.6385	238.346	688.822	-87.5959	205.878	734.62	185.721	280.123	752.098	184.067	256.927	762.104	261.859	274.658	729.692	361.524	724.866	678.444	-73.6059	753.045	738.124	192.032	683.297	757.641	187.86	704.837	759.567	277.054	689.489	730.759	370.875
421	4.2	474.977	1171.65	139.833	401.47	1169.13	91.0578	542.146	1181.15	89.6234	306.721	1039.76	-35.6456	654.035	1036.22	-46.0442	483.898	967.716	40.5245	238.348	688.828	-87.5698	205.879	734.608	185.705	280.15	752.081	184.042	256.929	762.086	261.792	274.653	729.68	361.512	724.863	678.431	-73.5148	753.057	738.118	192.078	683.302	757.622	187.828	704.849	759.579	277.059	689.499	730.755	370.886
422	4.21	474.986	1171.69	139.776	401.487	1169.15	91.0376	542.178	1181.17	89.5746	306.74	1039.76	-35.6472	654.029	1036.22	-46.0716	483.916	967.728	40.527	238.35	688.836	-87.5802	205.887	734.618	185.714	280.136	752.1	184	256.935	762.124	261.815	274.647	729.686	361.478	724.84	678.409	-73.4613	753.063	738.141	192.066	683.306	757.633	187.822	704.86	759.591	277.04	689.491	730.783	370.902
423	4.22	474.998	1171.72	139.889	401.472	1169.19	91.0467	542.166	1181.21	89.5521	306.721	1039.76	-35.6522	653.994	1036.22	-46.0871	483.902	967.78	40.5809	238.319	688.821	-87.572	205.854	734.635	185.705	280.126	752.147	184.041	256.94	762.141	261.853	274.627	729.684	361.473	724.808	678.401	-73.4561	753.035	738.177	192.086	683.27	757.658	187.84	704.835	759.621	277.058	689.448	730.809	370.934
424	4.23	474.98	1171.74	140	401.469	1169.2	91.0814	542.166	1181.21	89.5969	306.69	1039.75	-35.6566	653.973	1036.21	-46.0919	483.86	967.803	40.5766	238.304	688.792	-87.5575	205.792	734.643	185.664	280.089	752.171	184.02	256.924	762.095	261.817	274.602	729.682	361.462	724.793	678.365	-73.43	753.024	738.19	192.094	683.241	757.686	187.845	704.815	759.618	277.068	689.414	730.816	370.929
425	4.24	474.963	1171.72	139.941	401.482	1169.17	91.0418	542.191	1181.21	89.5899	306.692	1039.73	-35.6534	653.977	1036.2	-46.1195	483.853	967.801	40.5343	238.324	688.766	-87.5515	205.78	734.652	185.629	280.064	752.14	183.97	256.924	762.054	261.745	274.586	729.684	361.421	724.804	678.329	-73.3874	753.032	738.191	192.084	683.252	757.686	187.845	704.82	759.586	277.053	689.42	730.798	370.889
426	4.25	474.986	1171.65	139.828	401.499	1169.16	91.0044	542.224	1181.21	89.4907	306.709	1039.73	-35.6755	654.008	1036.22	-46.154	483.861	967.797	40.4563	238.323	688.772	-87.5678	205.796	734.668	185.613	280.058	752.116	183.963	256.917	762.046	261.694	274.602	729.686	361.438	724.811	678.35	-73.4456	753.046	738.181	192.064	683.277	757.66	187.824	704.836	759.562	277.022	689.428	730.766	370.84
427	4.26	475.018	1171.62	139.808	401.517	1169.14	91.024	542.238	1181.16	89.4988	306.719	1039.72	-35.6659	654.032	1036.21	-46.1459	483.892	967.758	40.4463	238.311	688.77	-87.5553	205.826	734.659	185.676	280.068	752.089	184.007	256.914	762.035	261.77	274.628	729.68	361.498	724.811	678.374	-73.5125	753.045	738.138	192.067	683.277	757.608	187.8	704.833	759.536	277.015	689.439	730.729	370.86
428	4.27	475.077	1171.61	139.823	401.544	1169.1	91.056	542.264	1181.12	89.5434	306.744	1039.7	-35.628	654.055	1036.19	-46.1382	483.935	967.72	40.508	238.309	688.774	-87.5454	205.866	734.626	185.735	280.105	752.07	184.048	256.913	762.015	261.784	274.652	729.658	361.526	724.828	678.364	-73.5283	753.063	738.089	192.078	683.274	757.581	187.865	704.85	759.509	277.047	689.467	730.715	370.913
429	4.28	475.12	1171.58	139.74	401.589	1169.1	91.0668	542.302	1181.11	89.5166	306.767	1039.7	-35.6125	654.069	1036.2	-46.1779	483.978	967.713	40.5222	238.299	688.79	-87.5619	205.907	734.601	185.731	280.154	752.074	184.064	256.932	762.025	261.769	274.67	729.627	361.489	724.815	678.343	-73.5313	753.074	738.077	192.061	683.313	757.568	187.822	704.873	759.498	277.006	689.499	730.708	370.888
430	4.29	475.168	1171.6	139.694	401.604	1169.12	91.0279	542.328	1181.14	89.4351	306.768	1039.72	-35.6222	654.065	1036.21	-46.2257	483.97	967.715	40.4353	238.277	688.811	-87.5914	205.886	734.61	185.665	280.149	752.088	184.027	256.95	762.049	261.741	274.648	729.638	361.432	724.769	678.364	-73.5506	753.069	738.111	192.012	683.318	757.601	187.781	704.866	759.526	276.961	689.501	730.75	370.86
431	4.3	475.136	1171.65	139.738	401.576	1169.15	91.0213	542.308	1181.15	89.4525	306.732	1039.74	-35.6414	654.029	1036.21	-46.2316	483.924	967.738	40.4205	238.257	688.803	-87.5966	205.828	734.629	185.619	280.101	752.099	184.008	256.922	762.068	261.716	274.612	729.648	361.41	724.727	678.343	-73.5088	753.045	738.138	191.991	683.264	757.637	187.814	704.842	759.554	276.984	689.46	730.802	370.897
432	4.31	475.13	1171.72	139.958	401.568	1169.17	91.0956	542.282	1181.17	89.5437	306.706	1039.76	-35.6156	654.007	1036.22	-46.1884	483.888	967.803	40.5096	238.256	688.822	-87.5969	205.779	734.65	185.651	280.064	752.139	184.048	256.909	762.087	261.77	274.58	729.675	361.429	724.697	678.312	-73.442	753.005	738.166	192.051	683.233	757.694	187.904	704.823	759.598	277.06	689.424	730.843	370.966
433	4.32	475.137	1171.7	140.052	401.59	1169.17	91.1514	542.284	1181.19	89.5474	306.708	1039.78	-35.5989	653.982	1036.22	-46.1802	483.884	967.839	40.5886	238.249	688.847	-87.607	205.763	734.674	185.672	280.057	752.168	184.068	256.933	762.084	261.828	274.559	729.71	361.416	724.666	678.29	-73.3873	752.992	738.188	192.052	683.232	757.715	187.897	704.809	759.625	277.063	689.417	730.855	370.969
434	4.33	475.178	1171.67	140.021	401.594	1169.17	91.119	542.314	1181.16	89.5649	306.716	1039.78	-35.6023	653.984	1036.2	-46.209	483.887	967.814	40.5748	238.241	688.854	-87.5983	205.768	734.671	185.652	280.042	752.155	184.017	256.916	762.088	261.794	274.574	729.696	361.421	724.67	678.298	-73.407	753.001	738.199	192.047	683.206	757.691	187.827	704.8	759.623	277.034	689.399	730.833	370.909
435	4.34	475.221	1171.62	139.967	401.618	1169.15	91.1412	542.36	1181.11	89.607	306.74	1039.76	-35.5779	654.022	1036.19	-46.211	483.91	967.764	40.5107	238.256	688.851	-87.5704	205.814	734.636	185.674	280.053	752.116	184.005	256.907	762.087	261.756	274.603	729.661	361.455	724.718	678.314	-73.4708	753.028	738.179	192.074	683.226	757.642	187.824	704.824	759.592	277.032	689.432	730.782	370.854
436	4.35	475.26	1171.55	139.98	401.671	1169.1	91.1874	542.411	1181.07	89.6169	306.783	1039.74	-35.5483	654.072	1036.17	-46.179	483.97	967.708	40.4945	238.277	688.862	-87.5674	205.874	734.612	185.72	280.105	752.077	184.023	256.946	762.064	261.752	274.643	729.649	361.512	724.757	678.324	-73.5004	753.048	738.141	192.073	683.279	757.601	187.85	704.857	759.566	277.04	689.478	730.744	370.855
437	4.36	475.277	1171.49	139.932	401.694	1169.07	91.1968	542.442	1181.03	89.6254	306.794	1039.73	-35.5484	654.084	1036.15	-46.1753	483.977	967.647	40.407	238.277	688.886	-87.5856	205.891	734.614	185.714	280.138	752.049	184.031	256.947	762.046	261.738	274.682	729.66	361.553	724.762	678.326	-73.5115	753.071	738.11	192.039	683.3	757.563	187.807	704.874	759.539	276.99	689.505	730.716	370.828
438	4.37	475.257	1171.42	139.77	401.691	1169.05	91.1856	542.453	1181	89.6261	306.794	1039.72	-35.5685	654.084	1036.14	-46.2053	483.961	967.636	40.3691	238.265	688.875	-87.5728	205.886	734.604	185.695	280.109	752.032	183.986	256.921	762.042	261.745	274.675	729.648	361.519	724.759	678.315	-73.51	753.081	738.083	192.016	683.297	757.543	187.767	704.873	759.529	276.962	689.506	730.702	370.787
439	4.38	475.274	1171.44	139.911	401.706	1169.06	91.2451	542.444	1180.99	89.6452	306.799	1039.74	-35.5695	654.077	1036.15	-46.2032	483.978	967.68	40.4472	238.235	688.854	-87.581	205.866	734.618	185.676	280.111	752.058	183.999	256.936	762.072	261.8	274.665	729.658	361.488	724.732	678.274	-73.4776	753.058	738.098	192.006	683.3	757.585	187.812	704.873	759.549	276.979	689.503	730.718	370.778
440	4.39	475.301	1171.57	140.171	401.697	1169.08	91.2925	542.418	1181.01	89.6608	306.803	1039.76	-35.5613	654.073	1036.15	-46.1622	483.994	967.756	40.5508	238.211	688.868	-87.6252	205.855	734.645	185.714	280.137	752.128	184.041	256.974	762.079	261.813	274.651	729.682	361.474	724.694	678.245	-73.4608	753.017	738.135	192.008	683.272	757.642	187.886	704.877	759.596	277.037	689.488	730.771	370.847
441	4.4	475.27	1171.52	140.111	401.688	1169.1	91.2983	542.412	1181.03	89.6556	306.787	1039.76	-35.538	654.06	1036.16	-46.1657	483.983	967.759	40.5449	238.188	688.864	-87.6428	205.82	734.65	185.692	280.107	752.147	184.053	256.967	762.075	261.795	274.62	729.682	361.444	724.671	678.202	-73.3977	752.996	738.173	192.003	683.256	757.679	187.866	704.857	759.61	277.028	689.474	730.805	370.884
442	4.41	475.268	1171.49	140.072	401.682	1169.09	91.2979	542.426	1181.05	89.7183	306.78	1039.77	-35.5423	654.045	1036.15	-46.1651	483.953	967.717	40.4244	238.179	688.855	-87.6134	205.779	734.645	185.616	280.061	752.137	183.994	256.923	762.071	261.76	274.592	729.658	361.414	724.673	678.192	-73.3671	753.008	738.182	192.015	683.239	757.696	187.878	704.838	759.601	276.994	689.465	730.814	370.887
443	4.42	475.265	1171.5	140.135	401.717	1169.07	91.3559	542.426	1181.03	89.7545	306.796	1039.77	-35.5319	654.058	1036.15	-46.1308	483.951	967.708	40.4296	238.202	688.867	-87.5905	205.794	734.641	185.645	280.074	752.14	184.021	256.925	762.084	261.778	274.607	729.667	361.463	724.679	678.227	-73.3743	753.018	738.181	192.062	683.245	757.683	187.901	704.838	759.601	277.051	689.459	730.821	370.902
444	4.43	475.275	1171.45	140.119	401.746	1169.05	91.3967	542.423	1181.01	89.8239	306.817	1039.77	-35.4962	654.086	1036.15	-46.0962	483.967	967.721	40.5803	238.229	688.918	-87.622	205.836	734.629	185.705	280.087	752.123	184.052	256.932	762.055	261.826	274.633	729.664	361.5	724.709	678.311	-73.4831	753.021	738.166	192.101	683.259	757.651	187.918	704.837	759.59	277.093	689.457	730.79	370.936
445	4.44	475.317	1171.41	140.09	401.75	1169.02	91.363	542.447	1180.98	89.8801	306.835	1039.75	-35.4885	654.106	1036.13	-46.0939	483.971	967.666	40.5318	238.272	688.918	-87.5996	205.868	734.602	185.719	280.111	752.077	184.049	256.936	762.015	261.796	274.645	729.626	361.462	724.762	678.353	-73.5493	753.049	738.13	192.122	683.28	757.602	187.855	704.848	759.559	277.078	689.463	730.735	370.917
446	4.45	475.33	1171.38	139.98	401.761	1169.01	91.325	542.489	1180.98	89.8319	306.845	1039.76	-35.5067	654.119	1036.13	-46.1245	484.004	967.638	40.4241	238.282	688.906	-87.5652	205.88	734.592	185.7	280.121	752.064	184.023	256.908	762.029	261.78	274.654	729.628	361.475	724.781	678.356	-73.5677	753.072	738.115	192.084	683.305	757.589	187.76	704.868	759.542	277.032	689.493	730.712	370.851
447	4.46	475.318	1171.37	140	401.768	1169.03	91.3207	542.487	1180.99	89.7568	306.848	1039.78	-35.5179	654.113	1036.16	-46.1568	484.023	967.685	40.499	238.276	688.907	-87.5794	205.865	734.613	185.673	280.117	752.082	184.017	256.916	762.068	261.771	274.652	729.661	361.47	724.76	678.329	-73.5709	753.063	738.132	192.038	683.308	757.606	187.783	704.867	759.556	277.012	689.5	730.731	370.814
448	4.47	475.308	1171.42	140.072	401.76	1169.06	91.3795	542.465	1181	89.7655	306.837	1039.8	-35.4814	654.089	1036.16	-46.1479	483.987	967.744	40.6014	238.28	688.901	-87.593	205.84	734.63	185.673	280.088	752.115	184.021	256.927	762.071	261.78	274.628	729.694	361.479	724.751	678.253	-73.4758	753.041	738.137	192.022	683.289	757.632	187.862	704.851	759.562	277.035	689.477	730.76	370.86
449	4.48	475.264	1171.45	140.11	401.715	1169.07	91.3786	542.437	1180.99	89.8375	306.811	1039.79	-35.4633	654.054	1036.14	-46.1282	483.947	967.773	40.6606	238.289	688.876	-87.5547	205.788	734.643	185.661	280.056	752.131	184.016	256.902	762.037	261.775	274.593	729.697	361.482	724.724	678.182	-73.3602	753.009	738.132	192.021	683.25	757.647	187.879	704.822	759.551	277.009	689.449	730.764	370.886
450	4.49	475.245	1171.45	140.03	401.694	1169.08	91.3444	542.436	1181.01	89.7859	306.793	1039.79	-35.4798	654.034	1036.14	-46.1495	483.936	967.776	40.6023	238.264	688.88	-87.5632	205.75	734.648	185.644	280.011	752.136	183.958	256.867	762.043	261.747	274.566	729.693	361.437	724.686	678.181	-73.3736	752.987	738.149	191.989	683.227	757.668	187.843	704.801	759.561	276.954	689.421	730.782	370.858
451	4.5	475.253	1171.47	139.928	401.709	1169.11	91.3325	542.447	1181.03	89.7189	306.797	1039.8	-35.4883	654.03	1036.16	-46.1918	483.96	967.779	40.5807	238.251	688.906	-87.624	205.759	734.645	185.623	280.011	752.138	183.935	256.875	762.079	261.759	274.571	729.689	361.408	724.678	678.226	-73.4365	752.979	738.167	191.973	683.224	757.67	187.817	704.792	759.576	276.946	689.418	730.807	370.841
452	4.51	475.334	1171.52	140.152	401.744	1169.08	91.3452	542.487	1181.03	89.778	306.826	1039.81	-35.45	654.066	1036.16	-46.1687	483.986	967.753	40.5759	238.278	688.946	-87.6522	205.795	734.629	185.647	280.058	752.106	183.96	256.927	762.066	261.8	274.606	729.672	361.426	724.7	678.267	-73.465	752.994	738.157	192.033	683.244	757.646	187.9	704.813	759.579	277.021	689.43	730.794	370.907
453	4.52	475.387	1171.5	140.2	401.802	1169.05	91.3963	542.524	1181.01	89.8258	306.857	1039.8	-35.3924	654.112	1036.14	-46.1344	484.027	967.714	40.5611	238.29	688.982	-87.6377	205.859	734.613	185.72	280.107	752.079	183.996	256.956	762.042	261.858	274.663	729.657	361.528	724.725	678.306	-73.4795	753.025	738.14	192.075	683.266	757.634	187.927	704.845	759.578	277.057	689.466	730.763	370.939
454	4.53	475.443	1171.47	140.085	401.86	1169.04	91.422	542.572	1181.02	89.7455	306.882	1039.81	-35.3841	654.142	1036.14	-46.1586	484.07	967.675	40.4827	238.273	688.994	-87.6104	205.893	734.606	185.747	280.125	752.068	183.996	256.948	762.046	261.848	274.695	729.655	361.566	724.734	678.354	-73.5501	753.064	738.135	192.056	683.306	757.617	187.836	704.892	759.573	277.043	689.499	730.759	370.891
455	4.54	475.455	1171.44	139.96	401.873	1169.04	91.3755	542.618	1181.02	89.6816	306.889	1039.8	-35.3889	654.159	1036.14	-46.194	484.083	967.66	40.411	238.269	688.992	-87.6095	205.893	734.613	185.702	280.128	752.056	183.991	256.949	762.05	261.781	274.694	729.658	361.538	724.727	678.353	-73.5946	753.088	738.121	192.039	683.31	757.587	187.766	704.904	759.552	277.004	689.498	730.741	370.843
456	4.55	475.454	1171.46	140.017	401.887	1169.05	91.3662	542.647	1181.02	89.7007	306.891	1039.78	-35.3657	654.147	1036.13	-46.2109	484.079	967.67	40.425	238.283	688.988	-87.626	205.885	734.609	185.673	280.118	752.067	184.015	256.976	762.017	261.719	274.684	729.649	361.51	724.713	678.272	-73.4964	753.084	738.129	192.07	683.313	757.59	187.811	704.9	759.539	277.021	689.501	730.74	370.85
457	4.56	475.44	1171.49	140.125	401.892	1169.08	91.386	542.654	1181.05	89.671	306.899	1039.79	-35.3458	654.13	1036.12	-46.224	484.069	967.724	40.5142	238.256	688.958	-87.6091	205.85	734.621	185.671	280.08	752.102	184.03	256.981	762.005	261.742	274.658	729.658	361.481	724.688	678.194	-73.3848	753.063	738.141	192.058	683.309	757.616	187.872	704.895	759.549	277.03	689.482	730.759	370.867
458	4.57	475.433	1171.55	140.152	401.878	1169.12	91.391	542.633	1181.08	89.6229	306.869	1039.8	-35.3791	654.095	1036.13	-46.2759	484.036	967.758	40.5307	238.201	688.95	-87.5978	205.795	734.641	185.647	280.028	752.137	184.005	256.932	762.026	261.76	274.615	729.676	361.458	724.643	678.167	-73.3767	753.046	738.158	191.98	683.272	757.635	187.824	704.869	759.566	276.974	689.452	730.779	370.829
459	4.58	475.459	1171.65	140.192	401.85	1169.14	91.3405	542.631	1181.08	89.5883	306.858	1039.82	-35.4135	654.077	1036.14	-46.3041	484.012	967.771	40.5219	238.164	688.974	-87.6319	205.767	734.656	185.637	280.029	752.163	183.98	256.892	762.052	261.725	274.597	729.694	361.449	724.609	678.165	-73.3881	753.037	738.165	191.96	683.246	757.657	187.809	704.86	759.59	276.968	689.433	730.79	370.804
460	4.59	475.488	1171.64	140.216	401.878	1169.15	91.3632	542.627	1181.06	89.6212	306.883	1039.85	-35.3794	654.089	1036.14	-46.2892	484.024	967.811	40.6136	238.156	688.997	-87.6151	205.793	734.65	185.702	280.059	752.188	184.029	256.922	762.083	261.831	274.622	729.698	361.476	724.59	678.168	-73.3841	753.012	738.154	192.01	683.262	757.685	187.871	704.87	759.619	277.04	689.433	730.802	370.881
461	4.6	475.535	1171.63	140.203	401.932	1169.14	91.4031	542.641	1181.05	89.6255	306.908	1039.86	-35.3535	654.113	1036.13	-46.2752	484.053	967.803	40.6072	238.165	688.997	-87.5882	205.822	734.639	185.746	280.095	752.169	184.113	256.935	762.098	261.925	274.644	729.678	361.505	724.591	678.195	-73.4044	753.018	738.135	192.025	683.296	757.687	187.919	704.885	759.624	277.071	689.451	730.799	370.918
462	4.61	475.551	1171.58	140.013	401.946	1169.12	91.3096	542.681	1181.06	89.5593	306.904	1039.86	-35.4085	654.12	1036.11	-46.3072	484.063	967.732	40.406	238.152	689.008	-87.5972	205.819	734.628	185.686	280.083	752.123	184.025	256.885	762.088	261.83	274.65	729.668	361.46	724.591	678.242	-73.5044	753.036	738.136	192.002	683.297	757.664	187.831	704.886	759.586	276.988	689.454	730.785	370.859
463	4.62	475.547	1171.52	139.855	401.941	1169.1	91.1852	542.706	1181.07	89.5329	306.906	1039.85	-35.4583	654.126	1036.1	-46.335	484.067	967.694	40.327	238.151	689.042	-87.6427	205.821	734.605	185.639	280.069	752.06	183.947	256.886	762.072	261.731	274.638	729.649	361.387	724.605	678.267	-73.5523	753.036	738.128	192.012	683.293	757.619	187.78	704.877	759.558	276.955	689.45	730.768	370.814
464	4.63	475.535	1171.52	139.878	401.967	1169.1	91.2238	542.725	1181.07	89.5373	306.911	1039.85	-35.4138	654.134	1036.08	-46.3348	484.073	967.706	40.3761	238.166	689.059	-87.6488	205.837	734.611	185.664	280.067	752.033	183.979	256.93	762.033	261.739	274.634	729.638	361.404	724.619	678.243	-73.5135	753.034	738.128	192.061	683.279	757.585	187.838	704.862	759.552	277.023	689.441	730.76	370.837
465	4.64	475.509	1171.53	139.9	401.965	1169.14	91.2413	542.735	1181.09	89.5076	306.897	1039.85	-35.4163	654.135	1036.09	-46.3445	484.065	967.722	40.3368	238.177	689.058	-87.6403	205.817	734.635	185.669	280.045	752.049	183.991	256.924	762.001	261.718	274.61	729.664	361.429	724.617	678.201	-73.469	753.023	738.163	192.049	683.256	757.603	187.84	704.852	759.551	277.023	689.419	730.764	370.844
466	4.65	475.458	1171.53	139.775	401.927	1169.17	91.1591	542.724	1181.11	89.4612	306.869	1039.86	-35.5023	654.107	1036.08	-46.3845	484.034	967.73	40.2493	238.171	689.052	-87.6632	205.748	734.643	185.589	279.999	752.063	183.921	256.875	761.98	261.673	274.574	729.684	361.393	724.61	678.172	-73.4618	753.018	738.194	191.992	683.211	757.623	187.775	704.829	759.559	276.966	689.389	730.771	370.771
467	4.66	475.47	1171.6	139.861	401.924	1169.2	91.1354	542.728	1181.12	89.4344	306.877	1039.87	-35.5359	654.101	1036.08	-46.3999	484.018	967.769	40.3017	238.193	689.018	-87.6305	205.724	734.659	185.562	279.989	752.116	183.94	256.875	761.995	261.673	274.562	729.703	361.388	724.61	678.151	-73.4534	753.003	738.205	191.997	683.199	757.65	187.78	704.831	759.587	276.96	689.377	730.796	370.794
468	4.67	475.536	1171.69	140.046	401.964	1169.23	91.1936	542.732	1181.1	89.456	306.911	1039.89	-35.5021	654.133	1036.09	-46.3605	484.05	967.811	40.4758	238.225	689	-87.5891	205.783	734.662	185.682	280.041	752.153	184.052	256.937	762.055	261.823	274.592	729.706	361.452	724.612	678.134	-73.4246	752.999	738.181	192.013	683.235	757.667	187.887	704.864	759.603	277.029	689.393	730.824	370.893
469	4.68	475.569	1171.65	139.929	401.997	1169.21	91.2018	542.751	1181.07	89.4621	306.93	1039.89	-35.5089	654.175	1036.08	-46.34	484.065	967.776	40.4104	238.231	689.012	-87.5947	205.839	734.641	185.748	280.1	752.149	184.093	256.959	762.06	261.889	274.641	729.693	361.523	724.617	678.123	-73.4158	753.019	738.135	192.039	683.285	757.653	187.928	704.893	759.583	277.065	689.432	730.811	370.916
470	4.69	475.606	1171.61	139.787	402.015	1169.19	91.1119	542.802	1181.06	89.375	306.964	1039.9	-35.5493	654.208	1036.05	-46.3719	484.104	967.702	40.229	238.237	689.027	-87.6045	205.863	734.614	185.691	280.13	752.09	184.031	256.961	762.055	261.833	274.673	729.662	361.488	724.627	678.124	-73.4318	753.057	738.093	192.036	683.325	757.603	187.808	704.922	759.555	276.989	689.48	730.766	370.858
471	4.7	475.648	1171.65	139.768	402.068	1169.18	91.0601	542.846	1181.06	89.2783	307.001	1039.9	-35.5882	654.239	1036.03	-46.3922	484.146	967.685	40.1432	238.239	689.049	-87.6404	205.913	734.597	185.666	280.164	752.068	184.006	257.004	762.061	261.792	274.7	729.647	361.478	724.627	678.142	-73.45	753.082	738.084	192.029	683.337	757.595	187.764	704.949	759.563	276.971	689.516	730.755	370.834
472	4.71	475.682	1171.72	139.864	402.098	1169.2	91.0784	542.846	1181.08	89.2402	307.009	1039.9	-35.5896	654.244	1036.04	-46.3767	484.193	967.723	40.2596	238.246	689.054	-87.6669	205.947	734.6	185.719	280.194	752.087	184.03	257.061	762.079	261.833	274.707	729.658	361.481	724.605	678.154	-73.4523	753.077	738.112	191.994	683.336	757.611	187.804	704.947	759.582	276.99	689.524	730.766	370.845
473	4.72	475.65	1171.74	139.939	402.042	1169.24	91.0662	542.815	1181.12	89.2685	306.971	1039.89	-35.5963	654.205	1036.04	-46.4061	484.147	967.744	40.2629	238.236	689.057	-87.6756	205.885	734.618	185.698	280.143	752.108	184.012	257.003	762.056	261.808	274.664	729.662	361.486	724.577	678.154	-73.4497	753.048	738.154	191.982	683.298	757.633	187.845	704.904	759.58	276.975	689.483	730.774	370.839
474	4.73	475.541	1171.73	139.779	401.962	1169.28	90.9896	542.775	1181.16	89.2846	306.914	1039.87	-35.6121	654.159	1036.06	-46.4548	484.056	967.78	40.2518	238.225	689.051	-87.6824	205.798	734.634	185.642	280.057	752.117	183.978	256.907	762.021	261.764	274.604	729.674	361.457	724.581	678.14	-73.4362	753.016	738.188	192.001	683.24	757.651	187.831	704.855	759.576	276.963	689.408	730.805	370.858
475	4.74	475.501	1171.79	139.742	401.934	1169.29	90.9795	542.743	1181.2	89.2867	306.903	1039.87	-35.6032	654.136	1036.08	-46.4641	484.021	967.802	40.3525	238.232	689.026	-87.668	205.783	734.651	185.679	280.006	752.113	183.992	256.855	762.025	261.743	274.572	729.699	361.429	724.597	678.129	-73.4168	752.987	738.197	192.002	683.211	757.659	187.88	704.822	759.567	277.015	689.357	730.825	370.882
476	4.75	475.513	1171.79	139.783	401.947	1169.29	91.0038	542.743	1181.2	89.2905	306.914	1039.86	-35.5841	654.143	1036.07	-46.4519	484.026	967.805	40.3832	238.243	689.025	-87.6482	205.792	734.649	185.726	280.014	752.097	184.024	256.863	762.017	261.789	274.583	729.687	361.45	724.615	678.138	-73.4242	752.986	738.181	192.052	683.227	757.628	187.909	704.829	759.561	277.065	689.352	730.794	370.918
477	4.76	475.589	1171.82	139.772	401.965	1169.28	90.926	542.785	1181.19	89.2854	306.935	1039.85	-35.5851	654.172	1036.06	-46.4341	484.069	967.771	40.2965	238.251	689.009	-87.5909	205.826	734.617	185.702	280.031	752.057	183.978	256.877	762.013	261.823	274.608	729.645	361.474	724.637	678.141	-73.4175	753.024	738.15	192.083	683.275	757.601	187.828	704.859	759.557	277.065	689.393	730.765	370.885
478	4.77	475.645	1171.8	139.631	402.013	1169.25	90.8719	542.849	1181.19	89.1896	306.964	1039.85	-35.6003	654.206	1036.07	-46.4573	484.131	967.722	40.157	238.244	688.966	-87.5333	205.876	734.581	185.68	280.082	752.034	183.929	256.922	762.035	261.82	274.637	729.631	361.441	724.639	678.162	-73.4358	753.069	738.125	192.029	683.321	757.587	187.764	704.906	759.558	277.017	689.442	730.734	370.812
479	4.78	475.667	1171.82	139.601	402.041	1169.25	90.8317	542.853	1181.2	89.0931	306.976	1039.85	-35.6181	654.225	1036.07	-46.4857	484.151	967.728	40.1362	238.25	688.976	-87.5771	205.902	734.58	185.66	280.112	752.051	183.951	256.965	762.061	261.779	274.657	729.639	361.392	724.62	678.177	-73.4599	753.086	738.114	191.996	683.331	757.587	187.764	704.916	759.555	276.995	689.451	730.737	370.801
480	4.79	475.644	1171.87	139.692	402.024	1169.27	90.855	542.82	1181.2	89.1123	306.976	1039.86	-35.6051	654.214	1036.08	-46.4742	484.132	967.761	40.2342	238.243	688.984	-87.606	205.871	734.617	185.679	280.105	752.083	184.012	256.961	762.051	261.76	274.643	729.661	361.411	724.6	678.156	-73.445	753.058	738.115	192.011	683.309	757.624	187.835	704.895	759.568	277.019	689.419	730.774	370.826
481	4.8	475.61	1171.92	139.813	402.001	1169.32	90.9224	542.791	1181.22	89.1387	306.959	1039.87	-35.5878	654.185	1036.1	-46.4594	484.104	967.815	40.3309	238.212	688.974	-87.5973	205.832	734.662	185.715	280.096	752.135	184.06	256.961	762.046	261.842	274.619	729.678	361.443	724.601	678.136	-73.4213	753.022	738.139	192.025	683.28	757.664	187.879	704.871	759.593	277.023	689.39	730.812	370.882
482	4.81	475.606	1171.98	139.838	401.994	1169.35	90.975	542.782	1181.26	89.1129	306.949	1039.88	-35.5793	654.17	1036.12	-46.4814	484.098	967.862	40.3873	238.214	688.976	-87.6174	205.822	734.699	185.69	280.074	752.158	184.063	256.961	762.053	261.847	274.593	729.708	361.424	724.597	678.136	-73.4358	753.001	738.187	191.968	683.266	757.707	187.905	704.842	759.611	277.009	689.354	730.859	370.912
483	4.82	475.599	1171.97	139.756	402.004	1169.37	90.9925	542.79	1181.28	89.1174	306.943	1039.88	-35.6009	654.172	1036.11	-46.495	484.115	967.862	40.3753	238.239	688.996	-87.6645	205.831	734.709	185.652	280.05	752.163	184.02	256.948	762.04	261.713	274.583	729.728	361.393	724.606	678.146	-73.4508	753.005	738.195	191.946	683.249	757.695	187.843	704.827	759.602	276.959	689.355	730.864	370.877
484	4.83	475.624	1171.89	139.78	402.019	1169.34	91.0011	542.826	1181.24	89.1714	306.95	1039.86	-35.5898	654.188	1036.09	-46.4565	484.137	967.787	40.3129	238.26	689.006	-87.6539	205.835	734.687	185.637	280.057	752.109	183.976	256.955	762.024	261.705	274.603	729.701	361.411	724.612	678.133	-73.4321	753.027	738.168	192.008	683.251	757.648	187.845	704.839	759.568	276.974	689.373	730.822	370.897
485	4.84	475.677	1171.79	139.869	402.056	1169.27	91.0562	542.861	1181.19	89.2637	306.974	1039.84	-35.5159	654.218	1036.05	-46.3853	484.165	967.707	40.3045	238.273	688.999	-87.5836	205.886	734.645	185.715	280.104	752.039	184.032	256.959	761.997	261.807	274.647	729.656	361.496	724.633	678.158	-73.4389	753.061	738.134	192.053	683.284	757.604	187.876	704.87	759.536	277.013	689.405	730.767	370.911
486	4.85	475.71	1171.69	139.803	402.113	1169.21	91.0679	542.891	1181.14	89.2998	306.997	1039.82	-35.478	654.247	1036.03	-46.3771	484.202	967.654	40.2792	238.291	689.018	-87.5632	205.952	734.609	185.753	280.165	751.997	184.075	256.982	761.991	261.834	274.685	729.619	361.519	724.659	678.231	-73.5169	753.082	738.111	192.043	683.32	757.557	187.804	704.894	759.512	277.008	689.432	730.714	370.867
487	4.86	475.734	1171.62	139.739	402.143	1169.17	91.035	542.918	1181.1	89.3049	307.012	1039.83	-35.5133	654.264	1036.03	-46.4013	484.214	967.64	40.217	238.317	689.038	-87.6074	205.963	734.584	185.687	280.2	751.995	184.035	256.992	762.01	261.762	274.693	729.612	361.464	724.659	678.242	-73.5706	753.092	738.097	192.049	683.337	757.527	187.724	704.916	759.5	276.98	689.45	730.7	370.821
488	4.87	475.726	1171.6	139.775	402.159	1169.16	91.1105	542.94	1181.09	89.3405	307.017	1039.85	-35.4978	654.264	1036.04	-46.4032	484.195	967.668	40.2347	238.327	689.021	-87.6061	205.942	734.596	185.667	280.188	752.026	184.044	256.995	762.049	261.736	274.679	729.628	361.44	724.647	678.187	-73.5158	753.094	738.111	192.033	683.339	757.548	187.778	704.915	759.518	276.99	689.457	730.718	370.841
489	4.88	475.711	1171.61	139.908	402.159	1169.2	91.2479	542.928	1181.08	89.3969	307.009	1039.86	-35.4614	654.248	1036.06	-46.3723	484.188	967.735	40.3626	238.298	688.98	-87.5733	205.904	734.633	185.732	280.17	752.081	184.117	256.982	762.072	261.842	274.638	729.661	361.457	724.623	678.114	-73.407	753.05	738.131	192.041	683.301	757.602	187.879	704.88	759.544	277.03	689.433	730.767	370.884
490	4.89	475.681	1171.61	139.959	402.125	1169.21	91.2797	542.925	1181.07	89.4346	306.97	1039.86	-35.4797	654.204	1036.07	-46.4059	484.144	967.791	40.4647	238.27	688.948	-87.5473	205.845	734.668	185.705	280.103	752.135	184.111	256.956	762.055	261.837	274.594	729.694	361.454	724.588	678.067	-73.3507	753.002	738.155	192.045	683.241	757.641	187.857	704.841	759.562	277.017	689.382	730.804	370.871
491	4.9	475.649	1171.6	139.887	402.11	1169.22	91.2363	542.919	1181.07	89.4469	306.951	1039.88	-35.5145	654.176	1036.08	-46.4491	484.099	967.774	40.3489	238.263	688.965	-87.5907	205.783	734.703	185.592	280.048	752.147	184.037	256.916	762.033	261.744	274.561	729.707	361.399	724.565	678.052	-73.3438	752.98	738.18	192.016	683.204	757.654	187.814	704.814	759.571	276.959	689.362	730.828	370.862
492	4.91	475.71	1171.65	139.969	402.137	1169.2	91.2765	542.949	1181.07	89.4292	306.967	1039.88	-35.503	654.184	1036.07	-46.4364	484.101	967.774	40.3714	238.242	688.977	-87.5981	205.784	734.724	185.606	280.052	752.147	184.037	256.929	762.058	261.771	274.569	729.718	361.41	724.564	678.062	-73.3757	752.977	738.189	191.994	683.199	757.671	187.828	704.815	759.584	276.988	689.404	730.834	370.881
493	4.92	475.808	1171.68	140.106	402.224	1169.16	91.3641	542.974	1181.04	89.4279	307.002	1039.89	-35.447	654.217	1036.07	-46.4226	484.156	967.769	40.4598	238.228	689.006	-87.6225	205.847	734.699	185.692	280.085	752.133	184.063	256.957	762.076	261.874	274.617	729.707	361.471	724.562	678.114	-73.4759	752.977	738.179	191.99	683.226	757.676	187.863	704.843	759.605	277.028	689.453	730.83	370.922
494	4.93	475.874	1171.57	139.976	402.291	1169.11	91.3324	543.013	1181.01	89.4325	307.013	1039.88	-35.467	654.244	1036.04	-46.4324	484.186	967.714	40.3484	238.24	689.037	-87.6396	205.89	734.665	185.688	280.105	752.094	184.011	256.955	762.071	261.847	274.663	729.659	361.485	724.577	678.162	-73.5644	752.999	738.146	191.981	683.262	757.617	187.804	704.86	759.585	277.02	689.503	730.793	370.862
495	4.94	475.911	1171.48	139.872	402.327	1169.08	91.2392	543.084	1180.99	89.4055	307.024	1039.88	-35.5074	654.272	1036.01	-46.4573	484.186	967.646	40.2042	238.244	689.057	-87.6464	205.877	734.641	185.614	280.113	752.058	183.942	256.935	762.076	261.762	274.68	729.643	361.456	724.583	678.162	-73.5272	753.043	738.12	191.99	683.284	757.562	187.74	704.881	759.561	276.97	689.555	730.752	370.817
496	4.95	475.981	1171.47	139.966	402.381	1169.07	91.2781	543.12	1180.98	89.3919	307.041	1039.87	-35.4787	654.298	1035.99	-46.4326	484.23	967.623	40.226	238.232	689.038	-87.6172	205.88	734.63	185.628	280.142	752.043	183.996	256.972	762.059	261.788	274.686	729.643	361.478	724.578	678.12	-73.4656	753.058	738.109	192.004	683.3	757.555	187.773	704.912	759.557	276.958	689.6	730.728	370.805
497	4.96	476.011	1171.51	140.061	402.416	1169.11	91.3492	543.144	1180.98	89.4075	307.037	1039.85	-35.4401	654.298	1035.98	-46.4203	484.237	967.633	40.2828	238.224	689.015	-87.5873	205.867	734.636	185.675	280.144	752.044	184.034	257.01	762.035	261.812	274.673	729.641	361.504	724.556	678.093	-73.445	753.05	738.125	192.01	683.297	757.588	187.85	704.909	759.563	277.009	689.606	730.739	370.815
498	4.97	475.946	1171.5	139.94	402.369	1169.15	91.2903	543.156	1180.99	89.4189	307.005	1039.83	-35.4766	654.257	1035.98	-46.4663	484.204	967.656	40.2734	238.222	688.988	-87.5825	205.819	734.651	185.621	280.097	752.049	184.008	256.975	761.986	261.721	274.608	729.631	361.453	724.525	678.032	-73.3848	753.025	738.164	192.008	683.24	757.593	187.803	704.884	759.564	276.988	689.578	730.755	370.788
499	4.98	475.912	1171.52	139.908	402.346	1169.17	91.2793	543.15	1181.01	89.4058	306.982	1039.82	-35.4999	654.231	1035.99	-46.5245	484.166	967.677	40.2659	238.214	688.995	-87.5962	205.767	734.688	185.56	280.054	752.077	183.999	256.944	761.977	261.66	274.577	729.642	361.408	724.501	677.981	-73.3154	753	738.189	192.002	683.2	757.605	187.789	704.859	759.56	276.948	689.548	730.766	370.756
500	4.99	475.926	1171.59	140.05	402.379	1169.2	91.3769	543.152	1181.01	89.3992	306.988	1039.84	-35.4734	654.241	1036.01	-46.5125	484.165	967.702	40.3355	238.2	689.018	-87.6154	205.778	734.715	185.629	280.062	752.121	184.058	256.957	762.027	261.744	274.577	729.674	361.442	724.501	677.989	-73.3456	752.981	738.186	192.021	683.199	757.633	187.854	704.858	759.574	276.989	689.549	730.78	370.78
501	5	475.984	1171.62	140.143	402.416	1169.2	91.4585	543.166	1180.99	89.4146	307.031	1039.88	-35.4554	654.269	1036.02	-46.501	484.189	967.71	40.3682	238.202	689.06	-87.6313	205.829	734.72	185.676	280.097	752.14	184.081	256.967	762.055	261.84	274.612	729.68	361.487	724.514	678.061	-73.4627	752.981	738.156	192.043	683.224	757.646	187.898	704.873	759.596	277.046	689.549	730.782	370.854
502	5.01	476.038	1171.56	139.951	402.447	1169.17	91.3543	543.203	1180.97	89.3932	307.061	1039.89	-35.4786	654.299	1036.01	-46.5097	484.213	967.656	40.2422	238.206	689.083	-87.6382	205.882	734.692	185.68	280.14	752.109	184.051	256.973	762.062	261.824	274.655	729.666	361.49	724.527	678.097	-73.5214	753.027	738.105	192.047	683.259	757.609	187.842	704.912	759.579	277.012	689.586	730.753	370.86
503	5.02	476.094	1171.53	139.799	402.507	1169.13	91.2765	543.262	1180.98	89.3308	307.089	1039.91	-35.5332	654.334	1036	-46.5235	484.278	967.629	40.1579	238.208	689.099	-87.6379	205.93	734.654	185.642	280.204	752.077	184.047	257.003	762.104	261.779	274.697	729.667	361.485	724.533	678.107	-73.5185	753.068	738.082	192.008	683.318	757.58	187.783	704.964	759.561	276.977	689.632	730.727	370.803
504	5.03	476.136	1171.54	139.793	402.538	1169.14	91.295	543.272	1181.01	89.2755	307.111	1039.91	-35.5479	654.35	1036	-46.514	484.319	967.619	40.1277	238.204	689.114	-87.6354	205.954	734.651	185.662	280.235	752.061	184.052	257.042	762.134	261.783	274.72	729.667	361.516	724.519	678.12	-73.5263	753.066	738.093	191.985	683.349	757.569	187.767	704.973	759.557	276.972	689.628	730.72	370.767
505	5.04	476.103	1171.56	139.882	402.511	1169.16	91.3153	543.246	1181.02	89.2707	307.089	1039.91	-35.5422	654.329	1036	-46.5249	484.26	967.619	40.0928	238.207	689.093	-87.6324	205.925	734.662	185.68	280.199	752.061	184.034	257.017	762.106	261.778	274.693	729.656	361.5	724.514	678.102	-73.4996	753.05	738.121	191.999	683.303	757.595	187.803	704.937	759.552	276.97	689.587	730.736	370.803
506	5.05	476.032	1171.6	139.942	402.44	1169.21	91.2559	543.205	1181.04	89.3294	307.055	1039.91	-35.5544	654.284	1036.01	-46.5704	484.198	967.688	40.1669	238.218	689.061	-87.6188	205.853	734.681	185.642	280.124	752.101	184.027	256.961	762.075	261.752	274.644	729.675	361.464	724.498	678.052	-73.4277	753.018	738.152	191.993	683.237	757.625	187.823	704.892	759.558	276.981	689.534	730.762	370.831
507	5.06	475.991	1171.72	140.035	402.388	1169.28	91.2437	543.17	1181.08	89.3175	307.032	1039.92	-35.5733	654.261	1036.04	-46.6263	484.16	967.784	40.3216	238.216	689.032	-87.6031	205.786	734.724	185.617	280.064	752.163	184.033	256.932	762.109	261.778	274.588	729.71	361.416	724.476	678.001	-73.3622	752.981	738.179	191.97	683.196	757.678	187.841	704.865	759.596	276.983	689.484	730.816	370.855
508	5.07	475.968	1171.73	139.996	402.367	1169.31	91.2497	543.157	1181.09	89.304	307.023	1039.94	-35.5847	654.255	1036.05	-46.6442	484.157	967.824	40.3826	238.215	689.01	-87.6157	205.769	734.755	185.651	280.043	752.184	184.048	256.942	762.115	261.803	274.566	729.725	361.416	724.479	677.972	-73.3101	752.972	738.202	191.968	683.187	757.717	187.854	704.849	759.618	276.997	689.451	730.842	370.886
509	5.08	475.985	1171.71	139.96	402.362	1169.29	91.1843	543.184	1181.07	89.2874	307.036	1039.92	-35.5688	654.273	1036.03	-46.6349	484.179	967.755	40.2656	238.214	689.003	-87.5904	205.784	734.726	185.659	280.063	752.158	184.076	256.949	762.071	261.828	274.588	729.688	361.457	724.494	677.971	-73.3127	752.98	738.191	192.004	683.204	757.678	187.83	704.858	759.611	277.008	689.475	730.799	370.858
510	5.09	476.038	1171.66	139.817	402.424	1169.24	91.1552	543.249	1181.06	89.207	307.062	1039.9	-35.5911	654.321	1036	-46.6262	484.226	967.679	40.1265	238.228	689.003	-87.5708	205.855	734.671	185.681	280.11	752.094	184.058	256.958	762.053	261.795	274.626	729.639	361.469	724.513	678.003	-73.3797	753.033	738.147	192.004	683.247	757.598	187.768	704.903	759.574	277.011	689.537	730.742	370.813
511	5.1	476.072	1171.58	139.579	402.491	1169.19	91.0966	543.287	1181.07	89.1447	307.096	1039.87	-35.623	654.361	1035.97	-46.6634	484.283	967.65	40.03	238.251	689.01	-87.5931	205.917	734.626	185.649	280.165	752.005	183.996	256.979	762.04	261.704	274.664	729.613	361.441	724.534	678.064	-73.4755	753.09	738.108	191.981	683.305	757.557	187.744	704.935	759.53	276.975	689.569	730.709	370.793
512	5.11	476.092	1171.57	139.474	402.496	1169.19	91.0448	543.286	1181.07	89.0995	307.096	1039.87	-35.6357	654.36	1035.96	-46.6879	484.31	967.631	39.9932	238.269	689.042	-87.6291	205.939	734.607	185.653	280.183	751.999	183.988	256.968	762.008	261.648	274.68	729.615	361.451	724.524	678.103	-73.5335	753.088	738.093	191.966	683.308	757.531	187.745	704.94	759.515	276.935	689.561	730.696	370.785
513	5.12	476.106	1171.63	139.581	402.49	1169.21	91.042	543.268	1181.08	89.1052	307.075	1039.87	-35.6252	654.34	1035.98	-46.6807	484.285	967.654	40.049	238.268	689.058	-87.6408	205.929	734.632	185.675	280.176	752.036	184.024	256.958	762.007	261.707	274.68	729.62	361.489	724.508	678.093	-73.4971	753.051	738.095	191.989	683.294	757.556	187.805	704.919	759.532	276.966	689.53	730.71	370.822
514	5.13	476.106	1171.75	139.778	402.484	1169.27	91.0842	543.244	1181.11	89.1272	307.073	1039.9	-35.6432	654.323	1036	-46.6862	484.253	967.726	40.1878	238.276	689.031	-87.6076	205.906	734.689	185.687	280.157	752.089	184.061	256.98	762.024	261.779	274.662	729.645	361.519	724.498	678.056	-73.4359	753.034	738.139	191.996	683.279	757.626	187.877	704.898	759.561	277.015	689.503	730.771	370.877
515	5.14	476.09	1171.81	139.781	402.459	1169.33	91.0601	543.216	1181.15	89.1043	307.061	1039.93	-35.681	654.304	1036.02	-46.7162	484.241	967.761	40.16	238.271	689.019	-87.6048	205.87	734.729	185.666	280.137	752.139	184.065	256.979	762.052	261.755	274.635	729.669	361.465	724.475	678.038	-73.4013	753.019	738.189	191.986	683.258	757.674	187.888	704.891	759.583	277.007	689.479	730.819	370.869
516	5.15	476.081	1171.87	139.823	402.45	1169.37	91.0139	543.205	1181.16	89.0906	307.05	1039.92	-35.6955	654.298	1036.04	-46.7413	484.219	967.77	40.1197	238.254	689.026	-87.6421	205.829	734.739	185.616	280.127	752.143	184.052	256.981	762.088	261.707	274.614	729.688	361.425	724.452	678.018	-73.3726	753.007	738.211	191.986	683.246	757.705	187.857	704.868	759.6	276.999	689.457	730.834	370.884
517	5.16	476.079	1171.85	139.82	402.475	1169.36	91.0607	543.223	1181.16	89.1234	307.07	1039.92	-35.658	654.322	1036.05	-46.7188	484.257	967.784	40.1997	238.277	689.004	-87.5982	205.863	734.721	185.66	280.15	752.137	184.077	257.021	762.097	261.802	274.635	729.686	361.48	724.472	678.019	-73.3721	753.026	738.187	192.038	683.251	757.69	187.863	704.893	759.615	277.014	689.466	730.81	370.903
518	5.17	476.116	1171.79	139.766	402.51	1169.33	91.0822	543.254	1181.14	89.1004	307.104	1039.9	-35.6325	654.362	1036.04	-46.7068	484.304	967.749	40.1458	238.311	688.985	-87.5568	205.903	734.69	185.663	280.2	752.12	184.108	257.044	762.102	261.877	274.669	729.662	361.496	724.503	678.034	-73.3909	753.057	738.14	192.038	683.314	757.65	187.869	704.931	759.581	277.011	689.505	730.779	370.895
519	5.18	476.112	1171.74	139.562	402.507	1169.3	90.9839	543.278	1181.12	89.0495	307.104	1039.89	-35.6785	654.373	1036.03	-46.7411	484.313	967.69	39.9575	238.312	689.001	-87.5756	205.921	734.67	185.611	280.198	752.063	184.023	257.016	762.111	261.801	274.672	729.651	361.457	724.514	678.056	-73.4254	753.087	738.113	192	683.33	757.595	187.743	704.956	759.534	276.959	689.525	730.735	370.814
520	5.19	476.112	1171.72	139.49	402.496	1169.28	90.9348	543.282	1181.12	89.032	307.112	1039.87	-35.6735	654.385	1036.04	-46.7511	484.322	967.668	39.9528	238.319	689.018	-87.6007	205.934	734.659	185.61	280.188	752.03	183.982	256.994	762.123	261.743	274.678	729.651	361.463	724.529	678.084	-73.4821	753.097	738.079	192.001	683.333	757.561	187.687	704.962	759.524	276.927	689.533	730.713	370.784
521	5.2	476.098	1171.74	139.553	402.481	1169.3	90.9996	543.262	1181.13	89.0596	307.123	1039.87	-35.6289	654.389	1036.05	-46.727	484.328	967.697	40.0385	238.339	689.011	-87.6028	205.953	734.679	185.669	280.217	752.053	184.057	257.006	762.116	261.82	274.681	729.661	361.499	724.542	678.091	-73.4893	753.085	738.089	191.979	683.325	757.578	187.808	704.944	759.545	276.968	689.533	730.743	370.84
522	5.21	476.074	1171.77	139.618	402.463	1169.34	91.0557	543.229	1181.17	89.0783	307.101	1039.88	-35.6502	654.357	1036.06	-46.7388	484.288	967.736	40.0429	238.317	689.013	-87.6204	205.927	734.709	185.694	280.192	752.088	184.073	257.003	762.111	261.825	274.649	729.68	361.502	724.539	678.086	-73.4852	753.049	738.137	191.948	683.278	757.61	187.833	704.905	759.568	276.964	689.502	730.784	370.84
523	5.22	476.024	1171.77	139.611	402.398	1169.36	90.9579	543.188	1181.2	89.063	307.059	1039.89	-35.6992	654.313	1036.07	-46.7764	484.248	967.729	40.0114	238.289	689.027	-87.6385	205.86	734.717	185.633	280.112	752.099	183.987	256.955	762.081	261.719	274.612	729.679	361.482	724.515	678.094	-73.504	753.013	738.172	191.931	683.228	757.633	187.777	704.853	759.562	276.926	689.438	730.786	370.823
524	5.23	475.967	1171.77	139.633	402.352	1169.36	90.9412	543.179	1181.21	89.0708	307.046	1039.88	-35.6753	654.286	1036.06	-46.7752	484.225	967.747	40.0711	238.282	689.019	-87.6217	205.817	734.718	185.619	280.052	752.093	183.952	256.927	762.058	261.715	274.588	729.671	361.454	724.506	678.088	-73.472	752.992	738.186	191.95	683.205	757.663	187.841	704.81	759.555	276.975	689.394	730.793	370.868
525	5.24	475.967	1171.78	139.747	402.367	1169.35	91.0351	543.18	1181.17	89.0983	307.045	1039.88	-35.6159	654.291	1036.05	-46.7397	484.219	967.757	40.1144	238.283	689	-87.5946	205.821	734.714	185.662	280.082	752.1	184.067	256.942	762.04	261.786	274.59	729.659	361.452	724.504	678.056	-73.4161	752.99	738.176	191.985	683.212	757.676	187.908	704.82	759.557	277.011	689.399	730.807	370.937
526	5.25	476.012	1171.74	139.693	402.414	1169.31	91.0433	543.198	1181.14	89.1229	307.062	1039.89	-35.6082	654.319	1036.04	-46.7125	484.245	967.717	40.037	238.286	689.004	-87.5924	205.858	734.688	185.664	280.117	752.081	184.072	256.959	762.04	261.841	274.617	729.644	361.472	724.493	678.068	-73.4282	753.016	738.135	191.996	683.256	757.656	187.875	704.873	759.564	276.997	689.442	730.792	370.93
527	5.26	476.074	1171.7	139.583	402.49	1169.27	91.0275	543.246	1181.12	89.1175	307.112	1039.91	-35.6212	654.367	1036.03	-46.7041	484.305	967.68	39.9531	238.275	689.028	-87.6202	205.915	734.657	185.669	280.198	752.058	184.044	256.983	762.073	261.827	274.658	729.633	361.449	724.505	678.1	-73.4789	753.077	738.095	191.989	683.324	757.614	187.811	704.943	759.559	276.96	689.503	730.752	370.847
528	5.27	476.15	1171.74	139.641	402.552	1169.24	91.0582	543.291	1181.09	89.1053	307.162	1039.91	-35.619	654.415	1036.03	-46.695	484.369	967.694	40.0331	238.299	689.022	-87.6065	205.974	734.635	185.675	280.256	752.041	184.039	257.037	762.106	261.798	274.709	729.648	361.474	724.532	678.101	-73.4893	753.111	738.09	191.999	683.37	757.598	187.809	704.978	759.574	276.969	689.546	730.744	370.835
529	5.28	476.188	1171.78	139.816	402.548	1169.22	91.0834	543.301	1181.07	89.117	307.164	1039.9	-35.6008	654.412	1036.02	-46.7036	484.371	967.709	40.0884	238.301	689.029	-87.6197	205.978	734.642	185.666	280.254	752.039	184.067	257.059	762.074	261.789	274.708	729.638	361.501	724.55	678.068	-73.456	753.102	738.094	192.011	683.361	757.587	187.799	704.965	759.569	277.002	689.557	730.728	370.853
530	5.29	476.131	1171.7	139.745	402.502	1169.23	91.0764	543.29	1181.08	89.1498	307.117	1039.9	-35.6254	654.372	1036.03	-46.7196	484.323	967.705	40.0417	238.305	689.031	-87.6329	205.934	734.671	185.67	280.204	752.04	184.083	257.028	762.025	261.746	274.666	729.636	361.493	724.554	678.055	-73.4354	753.074	738.121	192.014	683.317	757.604	187.8	704.923	759.546	276.979	689.527	730.738	370.842
531	5.3	476.069	1171.69	139.764	402.451	1169.27	91.0717	543.268	1181.1	89.1587	307.08	1039.88	-35.6325	654.339	1036.04	-46.739	484.274	967.745	40.0855	238.318	688.997	-87.5949	205.875	734.709	185.638	280.133	752.062	184.062	256.968	762.008	261.674	274.616	729.66	361.446	724.552	678.018	-73.4124	753.053	738.17	191.99	683.267	757.635	187.825	704.88	759.538	276.968	689.465	730.784	370.847
532	5.31	476.03	1171.71	139.794	402.42	1169.31	91.1005	543.24	1181.13	89.1837	307.071	1039.89	-35.6061	654.311	1036.04	-46.7462	484.227	967.792	40.2107	238.305	688.993	-87.5892	205.854	734.713	185.669	280.092	752.102	184.06	256.933	762.01	261.696	274.58	729.685	361.442	724.53	678.032	-73.4378	753.021	738.199	191.992	683.227	757.678	187.846	704.853	759.557	277.004	689.419	730.805	370.868
533	5.32	476.022	1171.72	139.811	402.435	1169.31	91.1512	543.215	1181.11	89.1836	307.06	1039.89	-35.5959	654.301	1036.04	-46.7241	484.222	967.781	40.2243	238.278	689.023	-87.625	205.84	734.701	185.675	280.097	752.113	184.091	256.925	762.012	261.787	274.581	729.675	361.475	724.496	678.051	-73.458	752.991	738.179	192.015	683.224	757.649	187.844	704.842	759.562	277.006	689.412	730.8	370.879
534	5.33	476.074	1171.69	139.809	402.49	1169.25	91.1761	543.243	1181.09	89.173	307.086	1039.9	-35.578	654.322	1036.03	-46.7168	484.258	967.728	40.1454	238.283	689.036	-87.6068	205.87	734.68	185.685	280.117	752.071	184.066	256.946	762.023	261.826	274.615	729.644	361.51	724.49	678.074	-73.4597	753.017	738.149	192.014	683.254	757.616	187.845	704.861	759.551	276.984	689.441	730.772	370.867
535	5.34	476.155	1171.69	139.742	402.57	1169.21	91.1916	543.285	1181.08	89.1641	307.142	1039.9	-35.5623	654.37	1036.02	-46.6997	484.334	967.703	40.0897	238.291	689.061	-87.63	205.939	734.654	185.682	280.192	752.048	184.072	257.004	762.057	261.79	274.667	729.629	361.494	724.488	678.085	-73.4289	753.068	738.121	191.981	683.318	757.602	187.808	704.924	759.551	276.955	689.5	730.744	370.834
536	5.35	476.203	1171.7	139.697	402.608	1169.22	91.165	543.295	1181.09	89.1641	307.171	1039.93	-35.6006	654.401	1036.03	-46.6935	484.379	967.707	40.0464	238.285	689.085	-87.6592	205.98	734.638	185.66	280.244	752.051	184.075	257.032	762.121	261.765	274.687	729.648	361.461	724.492	678.109	-73.4616	753.092	738.106	191.961	683.364	757.606	187.753	704.966	759.559	276.951	689.528	730.735	370.808
537	5.36	476.17	1171.69	139.661	402.594	1169.24	91.1845	543.281	1181.1	89.1948	307.161	1039.94	-35.5614	654.401	1036.03	-46.6607	484.356	967.717	40.0577	238.304	689.067	-87.6179	205.964	734.639	185.662	280.246	752.064	184.095	257.032	762.132	261.803	274.674	729.644	361.474	724.506	678.093	-73.4606	753.082	738.096	191.985	683.359	757.609	187.788	704.958	759.557	276.982	689.519	730.735	370.836
538	5.37	476.12	1171.72	139.774	402.534	1169.26	91.1756	543.27	1181.11	89.2061	307.146	1039.92	-35.4993	654.375	1036.03	-46.6509	484.295	967.756	40.1567	238.325	689.034	-87.5692	205.921	734.668	185.696	280.187	752.069	184.091	256.981	762.083	261.833	274.653	729.646	361.508	724.518	678.068	-73.4145	753.052	738.111	192.014	683.315	757.605	187.832	704.926	759.555	277.007	689.493	730.741	370.872
539	5.38	476.069	1171.76	139.83	402.476	1169.32	91.1511	543.25	1181.13	89.2185	307.123	1039.92	-35.5068	654.349	1036.05	-46.6702	484.256	967.788	40.146	238.339	689.028	-87.5802	205.883	734.698	185.684	280.124	752.083	184.05	256.934	762.061	261.783	274.626	729.661	361.488	724.521	678.035	-73.3846	753.027	738.146	191.998	683.258	757.621	187.84	704.873	759.549	276.987	689.454	730.763	370.858
540	5.39	476.043	1171.79	139.74	402.446	1169.36	91.1116	543.254	1181.16	89.1574	307.098	1039.93	-35.5589	654.337	1036.07	-46.6976	484.25	967.82	40.1546	238.323	689.049	-87.6249	205.864	734.726	185.626	280.087	752.122	184.002	256.928	762.055	261.722	274.603	729.692	361.435	724.52	678.051	-73.4495	753.014	738.186	191.963	683.233	757.646	187.795	704.86	759.564	276.942	689.439	730.798	370.843
541	5.4	476.105	1171.84	139.853	402.472	1169.37	91.1347	543.276	1181.17	89.1311	307.121	1039.96	-35.5334	654.35	1036.08	-46.6586	484.277	967.829	40.2159	238.315	689.054	-87.6102	205.892	734.745	185.679	280.127	752.14	184.061	256.987	762.042	261.746	274.619	729.707	361.476	724.517	678.067	-73.4411	753.015	738.195	191.977	683.252	757.664	187.793	704.886	759.571	276.96	689.45	730.823	370.86
542	5.41	476.148	1171.86	139.849	402.504	1169.35	91.1714	543.274	1181.17	89.1578	307.149	1039.96	-35.4775	654.361	1036.07	-46.6198	484.317	967.821	40.2412	238.321	689.062	-87.5658	205.931	734.73	185.738	280.172	752.115	184.127	257.019	762.033	261.797	274.653	729.692	361.54	724.518	678.058	-73.3889	753.031	738.174	192.013	683.3	757.668	187.863	704.912	759.577	277.031	689.471	730.827	370.911
543	5.42	476.139	1171.78	139.774	402.501	1169.3	91.0982	543.276	1181.14	89.1488	307.134	1039.93	-35.4986	654.361	1036.04	-46.6659	484.315	967.759	40.1232	238.324	689.092	-87.5975	205.931	734.684	185.682	280.166	752.043	184.068	256.99	762.006	261.77	274.654	729.625	361.501	724.518	678.095	-73.4621	753.045	738.129	192.016	683.302	757.626	187.86	704.909	759.553	277.016	689.477	730.772	370.893
544	5.43	476.111	1171.66	139.607	402.503	1169.24	91.0212	543.29	1181.11	89.1423	307.109	1039.92	-35.548	654.359	1036	-46.7062	484.292	967.686	39.9773	238.305	689.105	-87.6269	205.919	734.635	185.623	280.158	751.977	183.999	256.964	761.974	261.739	274.654	729.583	361.459	724.518	678.132	-73.5308	753.061	738.089	192.033	683.303	757.574	187.802	704.893	759.529	276.981	689.469	730.727	370.853
545	5.44	476.151	1171.67	139.651	402.539	1169.24	91.0636	543.305	1181.12	89.159	307.125	1039.92	-35.541	654.369	1036.01	-46.6911	484.311	967.687	40.0086	238.278	689.087	-87.6014	205.931	734.634	185.653	280.169	751.988	184.005	256.977	762.018	261.806	274.679	729.598	361.483	724.503	678.126	-73.4926	753.067	738.086	192.058	683.316	757.566	187.818	704.916	759.536	277.006	689.493	730.726	370.859
546	5.45	476.179	1171.76	139.785	402.553	1169.29	91.113	543.298	1181.15	89.1446	307.139	1039.94	-35.5432	654.377	1036.04	-46.6722	484.339	967.763	40.1501	238.272	689.069	-87.5954	205.938	734.677	185.678	280.183	752.05	184.059	257.025	762.069	261.832	274.684	729.628	361.506	724.487	678.085	-73.4296	753.067	738.129	192.027	683.327	757.613	187.865	704.946	759.566	277.011	689.507	730.766	370.877
547	5.46	476.132	1171.81	139.75	402.504	1169.33	91.0507	543.287	1181.15	89.0926	307.114	1039.95	-35.5911	654.356	1036.06	-46.6927	484.303	967.795	40.1283	238.274	689.064	-87.6159	205.896	734.703	185.644	280.154	752.096	184.039	257.014	762.065	261.763	274.65	729.652	361.472	724.493	678.062	-73.4244	753.061	738.157	191.982	683.307	757.65	187.83	704.918	759.578	276.935	689.469	730.783	370.847
548	5.47	476.065	1171.84	139.775	402.447	1169.36	91.0207	543.26	1181.16	89.1008	307.083	1039.95	-35.5933	654.326	1036.08	-46.7319	484.237	967.817	40.1004	238.279	689.051	-87.6117	205.845	734.725	185.626	280.112	752.114	184.035	256.946	762.055	261.725	274.603	729.681	361.434	724.493	678.056	-73.4269	753.031	738.158	191.993	683.261	757.668	187.819	704.866	759.583	276.926	689.422	730.791	370.834
549	5.48	476.029	1171.85	139.847	402.43	1169.37	91.0832	543.222	1181.16	89.1398	307.079	1039.95	-35.5657	654.318	1036.09	-46.7038	484.214	967.853	40.211	238.29	689.035	-87.5891	205.837	734.749	185.667	280.077	752.134	184.042	256.931	762.092	261.811	274.605	729.708	361.486	724.508	678.058	-73.4234	753.01	738.16	192.005	683.243	757.67	187.869	704.851	759.578	277.005	689.405	730.81	370.892
550	5.49	476.033	1171.84	139.787	402.445	1169.35	91.0886	543.218	1181.15	89.1128	307.086	1039.94	-35.5481	654.328	1036.09	-46.6732	484.226	967.856	40.2491	238.311	689.036	-87.5695	205.857	734.749	185.684	280.09	752.14	184.05	256.947	762.115	261.867	274.619	729.684	361.495	724.531	678.075	-73.4242	753.01	738.158	192.021	683.247	757.665	187.92	704.857	759.577	277.016	689.419	730.796	370.89
551	5.5	476.087	1171.8	139.706	402.46	1169.33	90.9927	543.234	1181.14	89.0504	307.098	1039.93	-35.6025	654.347	1036.09	-46.6935	484.246	967.805	40.1075	238.316	689.061	-87.5976	205.888	734.722	185.633	280.127	752.102	184.032	256.976	762.102	261.806	274.649	729.669	361.476	724.542	678.108	-73.4583	753.028	738.133	192.024	683.277	757.622	187.851	704.871	759.546	276.96	689.459	730.763	370.852
552	5.51	476.124	1171.77	139.577	402.488	1169.31	90.9327	543.253	1181.14	89.0283	307.122	1039.94	-35.6559	654.364	1036.09	-46.7171	484.274	967.764	39.9415	238.307	689.086	-87.6069	205.924	734.703	185.626	280.184	752.057	184.032	256.992	762.099	261.75	274.685	729.651	361.479	724.552	678.149	-73.4938	753.059	738.108	192.02	683.318	757.584	187.81	704.9	759.521	276.961	689.484	730.734	370.833
553	5.52	476.125	1171.75	139.55	402.492	1169.3	90.9431	543.245	1181.14	89.0124	307.129	1039.95	-35.6595	654.37	1036.09	-46.6932	484.3	967.77	39.9773	238.296	689.104	-87.5836	205.938	734.691	185.664	280.199	752.057	184.05	257.006	762.109	261.798	274.694	729.647	361.501	724.546	678.151	-73.4618	753.071	738.112	192.019	683.329	757.59	187.828	704.916	759.527	276.984	689.497	730.729	370.846
554	5.53	476.083	1171.77	139.557	402.445	1169.31	90.9244	543.214	1181.17	89.0202	307.093	1039.95	-35.6678	654.348	1036.1	-46.6731	484.26	967.79	39.9761	238.261	689.1	-87.6028	205.909	734.682	185.679	280.167	752.066	184.054	256.992	762.077	261.852	274.672	729.643	361.502	724.531	678.14	-73.4364	753.053	738.117	192.019	683.303	757.606	187.867	704.899	759.543	276.992	689.457	730.749	370.87
555	5.54	475.998	1171.78	139.469	402.403	1169.34	90.8794	543.177	1181.18	89.003	307.057	1039.95	-35.6951	654.325	1036.11	-46.6954	484.206	967.818	39.9457	238.242	689.099	-87.6183	205.851	734.691	185.644	280.132	752.084	184.057	256.951	762.052	261.846	274.639	729.633	361.456	724.518	678.12	-73.4135	753.039	738.135	192.032	683.267	757.626	187.854	704.859	759.533	276.981	689.414	730.761	370.885
556	5.55	475.945	1171.77	139.362	402.379	1169.39	90.8397	543.153	1181.22	88.9904	307.052	1039.96	-35.7218	654.321	1036.13	-46.7109	484.198	967.861	39.9426	238.244	689.099	-87.6251	205.838	734.723	185.625	280.108	752.09	184.042	256.946	762.063	261.819	274.623	729.664	361.455	724.524	678.107	-73.3922	753.022	738.165	192.02	683.256	757.66	187.861	704.852	759.548	276.98	689.422	730.792	370.909
557	5.56	475.964	1171.84	139.432	402.38	1169.41	90.8556	543.137	1181.23	88.9444	307.058	1039.97	-35.7427	654.316	1036.15	-46.7011	484.2	967.893	39.9919	238.245	689.099	-87.6167	205.866	734.741	185.669	280.115	752.097	184.058	256.984	762.066	261.789	274.638	729.686	361.488	724.542	678.115	-73.3954	753.019	738.177	192.011	683.261	757.674	187.915	704.86	759.555	277	689.433	730.796	370.899
558	5.57	475.983	1171.88	139.484	402.366	1169.41	90.8008	543.134	1181.22	88.9417	307.059	1039.98	-35.7626	654.327	1036.15	-46.6911	484.22	967.873	40.0019	238.247	689.098	-87.6099	205.906	734.714	185.713	280.141	752.094	184.099	257.008	762.045	261.811	274.649	729.662	361.499	724.564	678.13	-73.3976	753.033	738.153	192.032	683.278	757.658	187.924	704.874	759.541	276.994	689.442	730.77	370.871
559	5.58	475.987	1171.88	139.447	402.338	1169.41	90.6922	543.136	1181.22	88.9251	307.069	1039.98	-35.8033	654.352	1036.14	-46.6796	484.224	967.854	39.923	238.269	689.082	-87.5881	205.916	734.687	185.675	280.159	752.068	184.079	256.987	762.043	261.769	274.666	729.64	361.499	724.591	678.143	-73.4108	753.059	738.128	192.025	683.314	757.629	187.848	704.888	759.531	276.992	689.477	730.733	370.846
560	5.59	475.978	1171.9	139.295	402.359	1169.39	90.6803	543.124	1181.25	88.8674	307.08	1040	-35.8193	654.384	1036.17	-46.6614	484.22	967.86	39.8777	238.289	689.096	-87.5939	205.937	734.682	185.65	280.163	752.062	184.015	256.975	762.091	261.715	274.691	729.649	361.492	724.616	678.19	-73.4365	753.071	738.113	192.046	683.371	757.586	187.801	704.899	759.524	276.991	689.522	730.734	370.835
[truncated: 3 more columns]

## Sheet: Trial01
PathFileType	4	(X/Y/Z)	Trial01.trc
DataRate	CameraRate	NumFrames	NumMarkers	Units	OrigDataRate	OrigDataStartFrame	OrigNumFrames
100	100	512	16	mm	100	1	512
Frame#	Time	nasion			r zyg pr			l zyg pr			r should			l should			sternum			r elbow			r ulna			r radius			r hand			r finger			l elbow			l ulna			l radius			l hand			l finger
		X1	Y1	Z1	X2	Y2	Z2	X3	Y3	Z3	X4	Y4	Z4	X5	Y5	Z5	X6	Y6	Z6	X7	Y7	Z7	X8	Y8	Z8	X9	Y9	Z9	X10	Y10	Z10	X11	Y11	Z11	X12	Y12	Z12	X13	Y13	Z13	X14	Y14	Z14	X15	Y15	Z15	X16	Y16	Z16
1	0	444.014	1223.48	64.7694	373.611	1205.67	14.4184	514.935	1217.59	16.4673	283.471	1039.68	-75.1937	635.37	1042.29	-82.9083	462.494	991.095	7.73696	211.02	687.048	-82.9847	171.892	738.649	187.969	246.131	753.67	188.612	222.183	757.884	267.857	223.745	731.318	366.147	708.357	685.195	-76.0387	747.233	736.26	190.977	678.901	760.802	189.297	703.492	759.565	277.365	698.755	730.8	368.88
2	0.01	444.026	1223.5	65.2256	373.61	1205.68	14.5768	514.931	1217.59	16.6819	283.467	1039.7	-75.1003	635.373	1042.27	-82.8109	462.507	991.133	7.99271	211.03	687.044	-83.0165	171.904	738.645	188.017	246.118	753.682	188.652	222.166	757.895	267.834	223.739	731.338	366.203	708.333	685.048	-75.9052	747.217	736.277	190.961	678.884	760.802	189.287	703.487	759.575	277.404	698.768	730.821	368.976
3	0.02	443.996	1223.43	65.3551	373.602	1205.68	14.7338	514.941	1217.57	16.8771	283.472	1039.72	-75.018	635.368	1042.26	-82.7666	462.493	991.108	8.116	211.039	687.025	-83.0195	171.908	738.646	188.022	246.108	753.71	188.663	222.149	757.916	267.828	223.714	731.346	366.192	708.279	684.893	-75.7107	747.208	736.286	190.917	678.872	760.797	189.27	703.472	759.572	277.391	698.751	730.827	368.98
4	0.03	443.973	1223.37	65.3886	373.587	1205.68	14.8071	514.971	1217.55	17.0259	283.476	1039.74	-74.9731	635.367	1042.26	-82.755	462.475	991.078	8.09955	211.063	687.036	-83.0264	171.923	738.64	187.988	246.108	753.739	188.665	222.126	757.944	267.793	223.689	731.361	366.168	708.261	684.788	-75.6438	747.201	736.284	190.866	678.859	760.769	189.212	703.461	759.575	277.312	698.74	730.821	368.9
5	0.04	443.98	1223.32	65.457	373.631	1205.66	14.9419	514.997	1217.5	17.1338	283.503	1039.76	-74.9044	635.379	1042.27	-82.706	462.493	991.08	8.20024	211.087	687.084	-83.0646	171.937	738.66	187.982	246.121	753.765	188.666	222.141	757.972	267.813	223.708	731.376	366.187	708.337	684.846	-75.7658	747.211	736.279	190.862	678.852	760.766	189.215	703.463	759.578	277.319	698.739	730.815	368.901
6	0.05	444.068	1223.28	65.6953	373.716	1205.63	15.2022	515.037	1217.42	17.3099	283.549	1039.76	-74.8124	635.418	1042.25	-82.6156	462.545	991.078	8.40775	211.105	687.102	-83.0571	171.983	738.673	188.066	246.152	753.773	188.729	222.179	757.976	267.857	223.734	731.379	366.216	708.405	684.883	-75.8167	747.215	736.254	190.912	678.876	760.771	189.287	703.472	759.582	277.391	698.743	730.826	368.976
7	0.06	444.186	1223.21	65.9522	373.812	1205.59	15.3778	515.109	1217.34	17.4396	283.595	1039.76	-74.7294	635.478	1042.23	-82.5394	462.604	991.06	8.47927	211.098	687.097	-83.0143	172.011	738.683	188.122	246.181	753.772	188.745	222.205	757.957	267.907	223.761	731.368	366.252	708.462	684.942	-75.8693	747.239	736.235	190.943	678.914	760.771	189.29	703.503	759.591	277.411	698.781	730.842	368.996
8	0.07	444.301	1223.15	66.0622	373.884	1205.55	15.441	515.187	1217.29	17.5392	283.643	1039.77	-74.6921	635.532	1042.21	-82.5063	462.667	991.01	8.43477	211.065	687.088	-82.9813	172.009	738.692	188.054	246.189	753.741	188.682	222.209	757.93	267.875	223.794	731.362	366.237	708.519	685.037	-75.9694	747.273	736.246	190.958	678.937	760.786	189.229	703.545	759.612	277.389	698.813	730.843	368.952
9	0.08	444.384	1223.05	66.1464	373.946	1205.51	15.5287	515.253	1217.24	17.6701	283.679	1039.78	-74.6611	635.568	1042.2	-82.491	462.713	990.994	8.46342	211.02	687.113	-83.0051	172.003	738.695	188.041	246.176	753.726	188.623	222.207	757.919	267.843	223.787	731.353	366.197	708.587	685.091	-76.0056	747.281	736.258	191.003	678.955	760.802	189.249	703.552	759.622	277.415	698.802	730.847	368.95
10	0.09	444.415	1222.99	66.3194	373.998	1205.5	15.6844	515.318	1217.22	17.8355	283.704	1039.79	-74.6186	635.598	1042.2	-82.4277	462.722	991.01	8.61072	210.992	687.117	-82.9868	171.979	738.693	188.039	246.157	753.729	188.649	222.198	757.923	267.848	223.765	731.359	366.216	708.617	685.044	-75.9779	747.272	736.273	191.036	678.956	760.812	189.335	703.543	759.643	277.451	698.778	730.866	368.984
11	0.1	444.436	1222.92	66.491	374.041	1205.46	15.7888	515.365	1217.22	17.947	283.717	1039.81	-74.5957	635.627	1042.18	-82.3829	462.718	991.014	8.71899	210.962	687.113	-82.9706	171.94	738.685	188.028	246.133	753.719	188.67	222.187	757.925	267.872	223.734	731.368	366.207	708.653	685.034	-76.0215	747.268	736.292	191.037	678.936	760.804	189.325	703.517	759.651	277.433	698.742	730.878	369.019
12	0.11	444.433	1222.84	66.4854	374.086	1205.43	15.8371	515.407	1217.18	17.9926	283.74	1039.82	-74.6054	635.655	1042.15	-82.3785	462.729	991.021	8.73197	210.936	687.123	-82.9992	171.933	738.679	188.07	246.116	753.71	188.654	222.163	757.947	267.829	223.703	731.371	366.166	708.643	684.997	-76.0323	747.257	736.287	191.004	678.925	760.781	189.285	703.5	759.641	277.404	698.7	730.857	368.985
13	0.12	444.463	1222.78	66.4452	374.139	1205.4	15.8358	515.485	1217.14	18.0778	283.788	1039.82	-74.6368	635.693	1042.13	-82.3909	462.757	990.971	8.68012	210.941	687.138	-83.0285	171.934	738.681	188.033	246.122	753.718	188.66	222.161	757.96	267.799	223.703	731.376	366.161	708.593	684.885	-75.9237	747.249	736.26	190.98	678.917	760.747	189.276	703.498	759.618	277.382	698.683	730.823	368.957
14	0.13	444.546	1222.72	66.4817	374.24	1205.36	15.9436	515.578	1217.09	18.1281	283.865	1039.83	-74.6302	635.755	1042.09	-82.3739	462.816	990.944	8.69709	210.957	687.155	-83.0394	171.968	738.685	188.041	246.154	753.729	188.68	222.193	757.96	267.86	223.733	731.385	366.183	708.569	684.797	-75.9059	747.254	736.21	190.963	678.926	760.724	189.282	703.509	759.594	277.359	698.707	730.82	368.996
15	0.14	444.702	1222.69	66.6693	374.372	1205.36	16.0702	515.682	1217.04	18.1332	283.941	1039.83	-74.6075	635.837	1042.04	-82.3429	462.926	990.945	8.76728	210.957	687.163	-83.0385	172.012	738.718	188.092	246.203	753.742	188.696	222.243	757.963	267.919	223.78	731.377	366.232	708.515	684.703	-75.8751	747.269	736.172	190.919	678.947	760.701	189.271	703.55	759.57	277.341	698.74	730.82	369.007
16	0.15	444.816	1222.65	66.6659	374.496	1205.37	16.096	515.797	1217.03	18.1661	284.011	1039.84	-74.6216	635.901	1042.01	-82.3474	462.998	990.935	8.70854	210.955	687.178	-83.0311	172.026	738.737	188.068	246.24	753.738	188.76	222.268	757.951	267.909	223.808	731.361	366.243	708.471	684.616	-75.7914	747.276	736.165	190.904	678.972	760.685	189.252	703.573	759.556	277.305	698.75	730.8	368.979
17	0.16	444.887	1222.61	66.6077	374.576	1205.38	16.0934	515.893	1217.02	18.2406	284.054	1039.85	-74.6508	635.937	1041.97	-82.3541	463.036	990.902	8.60475	210.973	687.207	-83.0419	172.01	738.745	188.036	246.226	753.734	188.737	222.252	757.927	267.875	223.796	731.359	366.189	708.438	684.552	-75.7194	747.277	736.16	190.915	678.964	760.673	189.242	703.557	759.552	277.305	698.738	730.786	368.989
18	0.17	444.954	1222.65	66.6744	374.633	1205.39	16.0862	515.961	1217.04	18.2721	284.083	1039.87	-74.6541	635.957	1041.94	-82.3742	463.033	990.9	8.59043	210.96	687.219	-83.0556	171.987	738.725	188.093	246.186	753.743	188.693	222.22	757.934	267.862	223.767	731.348	366.2	708.428	684.548	-75.7676	747.271	736.185	190.94	678.915	760.678	189.264	703.529	759.582	277.358	698.717	730.808	369.007
19	0.18	445.032	1222.7	66.7846	374.714	1205.42	16.1312	516.031	1217.05	18.2869	284.106	1039.92	-74.6734	635.982	1041.91	-82.3849	463.061	990.959	8.6897	210.932	687.243	-83.0591	171.969	738.721	188.102	246.16	753.746	188.693	222.196	757.943	267.879	223.737	731.352	366.217	708.471	684.598	-75.9465	747.242	736.216	190.943	678.888	760.698	189.294	703.508	759.616	277.388	698.695	730.841	369.043
20	0.19	445.119	1222.74	66.7415	374.775	1205.47	16.0868	516.126	1217.05	18.2749	284.154	1039.98	-74.7226	636.02	1041.89	-82.4027	463.094	991.005	8.68203	210.939	687.28	-83.084	171.951	738.745	188.031	246.145	753.755	188.676	222.169	757.945	267.81	223.72	731.372	366.176	708.508	684.607	-76.0475	747.23	736.243	190.934	678.879	760.708	189.244	703.501	759.646	277.368	698.715	730.866	369.027
21	0.2	445.226	1222.76	66.6922	374.888	1205.49	16.0324	516.249	1217.04	18.2489	284.229	1040.01	-74.7664	636.086	1041.89	-82.4415	463.148	991.004	8.61178	210.942	687.316	-83.0898	171.968	738.76	187.999	246.163	753.764	188.655	222.181	757.953	267.774	223.726	731.378	366.159	708.519	684.583	-76.0371	747.232	736.265	190.932	678.872	760.719	189.222	703.5	759.658	277.368	698.751	730.887	368.985
22	0.21	445.355	1222.81	66.7752	375.033	1205.5	16.0624	516.351	1216.99	18.1953	284.304	1040.03	-74.7803	636.151	1041.87	-82.4549	463.238	990.997	8.60228	210.939	687.338	-83.0955	172.008	738.773	188.075	246.189	753.771	188.689	222.218	757.969	267.819	223.768	731.391	366.211	708.51	684.526	-75.9845	747.24	736.249	190.942	678.889	760.704	189.231	703.52	759.654	277.378	698.786	730.908	368.981
23	0.22	445.468	1222.76	66.6423	375.145	1205.52	16.1074	516.453	1216.94	18.1574	284.388	1040.02	-74.7797	636.221	1041.83	-82.4522	463.319	990.99	8.62961	210.927	687.34	-83.0747	172.035	738.793	188.156	246.224	753.779	188.734	222.26	757.962	267.895	223.804	731.388	366.253	708.477	684.417	-75.89	747.254	736.197	190.971	678.918	760.681	189.238	703.545	759.636	277.392	698.837	730.898	369
24	0.23	445.59	1222.75	66.5827	375.23	1205.5	16.0431	516.583	1216.89	18.089	284.465	1040.01	-74.8213	636.283	1041.81	-82.5147	463.374	990.951	8.52744	210.936	687.36	-83.0591	172.05	738.794	188.168	246.258	753.762	188.729	222.276	757.953	267.912	223.828	731.372	366.261	708.455	684.296	-75.7789	747.265	736.154	190.951	678.926	760.634	189.24	703.577	759.604	277.356	698.895	730.853	368.974
25	0.24	445.694	1222.74	66.4626	375.303	1205.5	15.9225	516.705	1216.86	18.0153	284.513	1040.01	-74.9199	636.339	1041.77	-82.6192	463.432	990.932	8.41796	210.918	687.394	-83.0814	172.042	738.805	188.113	246.258	753.755	188.687	222.262	757.946	267.849	223.828	731.361	366.235	708.438	684.238	-75.7458	747.274	736.142	190.896	678.935	760.614	189.196	703.58	759.58	277.298	698.927	730.815	368.879
26	0.25	445.775	1222.69	66.4655	375.348	1205.5	15.8885	516.788	1216.89	17.9718	284.554	1040.01	-74.9899	636.358	1041.73	-82.6733	463.463	990.954	8.43053	210.857	687.411	-83.0858	172.043	738.814	188.132	246.234	753.751	188.689	222.256	757.935	267.844	223.817	731.342	366.244	708.458	684.222	-75.8079	747.261	736.15	190.866	678.92	760.598	189.205	703.569	759.591	277.297	698.941	730.799	368.884
27	0.26	445.837	1222.67	66.4816	375.396	1205.49	15.8627	516.852	1216.93	17.948	284.58	1040.03	-75.0344	636.376	1041.7	-82.6781	463.476	990.992	8.47469	210.767	687.404	-83.0561	172.012	738.812	188.163	246.185	753.747	188.705	222.251	757.92	267.915	223.792	731.334	366.275	708.456	684.19	-75.8088	747.241	736.17	190.896	678.889	760.599	189.218	703.561	759.625	277.327	698.944	730.809	368.915
28	0.27	445.882	1222.67	66.3529	375.457	1205.51	15.7873	516.925	1216.97	17.8956	284.597	1040.07	-75.1022	636.408	1041.68	-82.7411	463.467	990.983	8.36169	210.711	687.447	-83.085	171.959	738.799	188.09	246.126	753.75	188.663	222.202	757.925	267.868	223.742	731.345	366.223	708.456	684.18	-75.819	747.235	736.198	190.908	678.869	760.605	189.191	703.542	759.663	277.321	698.932	730.818	368.87
29	0.28	445.948	1222.69	66.2495	375.529	1205.54	15.7	517.024	1216.99	17.8414	284.634	1040.09	-75.1765	636.444	1041.66	-82.8333	463.493	990.995	8.28531	210.676	687.524	-83.1439	171.924	738.801	188.041	246.088	753.76	188.626	222.17	757.937	267.784	223.702	731.353	366.169	708.5	684.203	-75.8852	747.227	736.218	190.929	678.854	760.618	189.173	703.511	759.689	277.31	698.92	730.828	368.867
30	0.29	446.056	1222.67	66.2632	375.635	1205.59	15.7235	517.107	1216.98	17.7971	284.704	1040.11	-75.2185	636.509	1041.67	-82.873	463.563	991.023	8.34484	210.669	687.561	-83.1235	171.934	738.813	188.094	246.114	753.773	188.659	222.194	757.948	267.845	223.714	731.366	366.216	708.545	684.224	-75.9388	747.226	736.227	190.972	678.865	760.633	189.211	703.514	759.714	277.364	698.918	730.848	368.905
31	0.3	446.147	1222.64	66.1461	375.738	1205.6	15.7055	517.2	1216.95	17.7344	284.794	1040.14	-75.2495	636.602	1041.67	-82.8749	463.647	991.019	8.42768	210.649	687.595	-83.1119	171.964	738.817	188.171	246.159	753.781	188.712	222.223	757.953	267.904	223.761	731.365	366.271	708.588	684.268	-76.0083	747.237	736.216	190.982	678.902	760.637	189.265	703.545	759.715	277.402	698.93	730.877	368.952
32	0.31	446.312	1222.76	66.1629	375.862	1205.6	15.64	517.297	1216.89	17.595	284.884	1040.16	-75.3304	636.688	1041.66	-82.9352	463.713	990.971	8.30514	210.636	687.671	-83.1733	171.997	738.847	188.178	246.207	753.774	188.749	222.239	757.957	267.902	223.818	731.36	366.288	708.615	684.3	-76.0572	747.266	736.192	190.987	678.936	760.637	189.242	703.571	759.703	277.381	698.961	730.879	368.956
33	0.32	446.425	1222.8	66.0369	375.968	1205.63	15.563	517.41	1216.87	17.465	284.943	1040.19	-75.4066	636.759	1041.64	-83.0054	463.784	990.917	8.12702	210.628	687.705	-83.1783	172.025	738.872	188.187	246.241	753.785	188.748	222.252	757.981	267.889	223.865	731.362	366.281	708.622	684.257	-76.0114	747.295	736.169	190.955	678.964	760.625	189.191	703.604	759.691	277.357	698.984	730.864	368.899
34	0.33	446.521	1222.86	66.0675	376.051	1205.69	15.4956	517.523	1216.87	17.3922	284.989	1040.22	-75.4595	636.806	1041.61	-83.0558	463.837	990.925	8.0751	210.626	687.698	-83.1269	172.018	738.873	188.189	246.232	753.815	188.761	222.236	758.006	267.926	223.874	731.367	366.298	708.598	684.125	-75.8815	747.314	736.146	190.903	678.991	760.616	189.162	703.614	759.677	277.309	698.978	730.852	368.876
35	0.34	446.566	1222.92	66.0771	376.107	1205.77	15.4503	517.592	1216.9	17.3296	285.004	1040.27	-75.5294	636.815	1041.61	-83.0996	463.837	991.017	8.18571	210.621	687.752	-83.1559	171.997	738.884	188.229	246.189	753.836	188.755	222.212	758.024	267.966	223.848	731.366	366.337	708.532	683.995	-75.7371	747.299	736.149	190.896	678.979	760.614	189.201	703.593	759.681	277.31	698.958	730.855	368.914
36	0.35	446.558	1222.89	65.8969	376.141	1205.83	15.3449	517.623	1216.95	17.2891	285.009	1040.36	-75.6261	636.812	1041.59	-83.1812	463.816	991.078	8.23501	210.629	687.863	-83.2112	171.965	738.878	188.249	246.146	753.869	188.741	222.155	758.04	267.929	223.793	731.353	366.323	708.477	683.909	-75.6403	747.283	736.17	190.889	678.943	760.616	189.19	703.564	759.679	277.302	698.903	730.852	368.952
37	0.36	446.609	1222.92	65.8298	376.18	1205.88	15.1836	517.66	1217	17.2409	285.036	1040.44	-75.7082	636.819	1041.58	-83.3048	463.796	991.093	8.17514	210.651	688.002	-83.2474	171.902	738.876	188.218	246.105	753.862	188.739	222.103	758.048	267.917	223.737	731.331	366.316	708.495	683.889	-75.6022	747.27	736.175	190.881	678.918	760.616	189.182	703.537	759.674	277.29	698.829	730.846	368.959
38	0.37	446.71	1223.03	65.7801	376.243	1205.91	15.0601	517.712	1217.04	17.1403	285.081	1040.57	-75.802	636.859	1041.59	-83.3997	463.817	991.102	8.07961	210.663	688.182	-83.3124	171.894	738.892	188.263	246.094	753.853	188.767	222.078	758.072	267.946	223.707	731.315	366.339	708.544	683.965	-75.6576	747.267	736.184	190.913	678.927	760.628	189.193	703.523	759.697	277.311	698.78	730.82	368.951
39	0.38	446.846	1223.13	65.655	376.359	1205.95	14.9649	517.817	1217.06	17.0171	285.179	1040.73	-75.92	636.941	1041.61	-83.47	463.902	991.108	7.97445	210.656	688.413	-83.3524	171.919	738.909	188.332	246.144	753.852	188.819	222.108	758.092	268.03	223.738	731.317	366.423	708.612	684.123	-75.86	747.286	736.191	190.965	678.951	760.65	189.257	703.553	759.704	277.347	698.802	730.824	368.952
40	0.39	446.996	1223.23	65.4923	376.491	1206	14.8003	517.952	1217.1	16.7912	285.299	1040.89	-76.0362	637.033	1041.63	-83.5849	464.016	991.107	7.80776	210.668	688.652	-83.3935	171.962	738.944	188.353	246.193	753.833	188.869	222.127	758.138	268.068	223.777	731.313	366.468	708.705	684.274	-76.049	747.321	736.19	190.986	678.99	760.672	189.286	703.611	759.709	277.363	698.836	730.819	368.962
41	0.4	447.109	1223.31	65.2122	376.632	1206.08	14.5497	518.103	1217.17	16.5359	285.407	1041.05	-76.1395	637.117	1041.63	-83.7098	464.119	991.151	7.60675	210.672	688.893	-83.444	171.997	738.96	188.326	246.222	753.849	188.863	222.124	758.219	268.06	223.805	731.315	366.493	708.737	684.342	-76.108	747.351	736.206	191.024	679.016	760.682	189.28	703.634	759.72	277.381	698.853	730.825	368.943
42	0.41	447.156	1223.37	64.8092	376.752	1206.17	14.2873	518.222	1217.28	16.3183	285.491	1041.21	-76.243	637.201	1041.62	-83.818	464.185	991.255	7.44214	210.646	689.13	-83.482	172.001	738.958	188.336	246.203	753.869	188.879	222.072	758.308	268.041	223.788	731.321	366.529	708.715	684.335	-76.1046	747.343	736.217	191.028	679.022	760.693	189.278	703.611	759.726	277.399	698.861	730.846	368.951
43	0.42	447.233	1223.53	64.414	376.853	1206.31	14.0105	518.322	1217.42	16.072	285.556	1041.38	-76.3487	637.257	1041.63	-83.9667	464.235	991.433	7.41715	210.585	689.31	-83.4866	171.972	738.958	188.367	246.161	753.899	188.922	221.995	758.413	268.039	223.747	731.337	366.606	708.681	684.266	-76.0447	747.308	736.23	191.028	679.001	760.7	189.26	703.585	759.737	277.416	698.841	730.864	368.979
44	0.43	447.386	1223.72	64.198	376.995	1206.48	13.7377	518.462	1217.58	15.7906	285.651	1041.59	-76.4621	637.33	1041.64	-84.1407	464.3	991.611	7.3183	210.506	689.473	-83.403	171.925	738.959	188.402	246.113	753.945	188.924	221.902	758.545	268.037	223.694	731.355	366.659	708.581	684.095	-75.8298	747.293	736.225	191.011	678.982	760.7	189.235	703.566	759.747	277.383	698.823	730.877	368.987
45	0.44	447.518	1223.92	63.7375	377.147	1206.68	13.2982	518.663	1217.73	15.3985	285.745	1041.84	-76.6428	637.399	1041.63	-84.3909	464.382	991.736	7.05108	210.391	689.67	-83.2872	171.853	738.969	188.407	246.034	753.999	188.91	221.772	758.68	268.003	223.638	731.367	366.695	708.452	683.958	-75.6427	747.28	736.229	190.972	678.973	760.703	189.222	703.558	759.739	277.352	698.824	730.866	368.977
46	0.45	447.721	1224.14	63.2434	377.344	1206.87	12.8718	518.868	1217.86	14.9485	285.855	1042.13	-76.8674	637.478	1041.62	-84.6646	464.484	991.846	6.80877	210.239	689.933	-83.1506	171.782	738.994	188.486	245.947	754.073	188.92	221.657	758.821	268.057	223.625	731.352	366.826	708.336	683.895	-75.6191	747.267	736.215	190.949	678.976	760.689	189.211	703.562	759.728	277.329	698.819	730.839	368.948
47	0.46	448.001	1224.32	62.7803	377.59	1207.04	12.4791	519.091	1217.96	14.5425	285.987	1042.45	-77.0775	637.605	1041.6	-84.9143	464.599	991.961	6.65082	210.118	690.23	-82.9548	171.707	739.028	188.676	245.845	754.247	189.051	221.554	758.961	268.201	223.623	731.341	367.055	708.26	683.88	-75.6484	747.274	736.194	190.974	679.004	760.688	189.261	703.588	759.72	277.367	698.845	730.83	369
48	0.47	448.291	1224.53	62.2623	377.86	1207.22	11.9654	519.372	1218.07	14.0674	286.145	1042.81	-77.3683	637.753	1041.58	-85.2267	464.719	992.039	6.36298	210.058	690.637	-82.8012	171.588	739.092	188.847	245.693	754.563	189.284	221.425	759.117	268.36	223.598	731.337	367.29	708.211	683.91	-75.7025	747.303	736.164	191.006	679.02	760.688	189.275	703.626	759.709	277.381	698.868	730.819	369.026
49	0.48	448.555	1224.78	61.6904	378.12	1207.45	11.3607	519.638	1218.22	13.5025	286.33	1043.25	-77.7924	637.875	1041.58	-85.5978	464.783	992.148	5.98331	210.073	691.239	-82.7526	171.48	738.92	189.382	245.461	755.061	189.587	221.413	759.184	268.46	223.809	731.051	367.036	708.161	683.977	-75.782	747.309	736.177	190.986	679.008	760.713	189.257	703.635	759.721	277.372	698.858	730.808	368.988
50	0.49	448.819	1225.1	61.2676	378.328	1207.7	10.771	519.866	1218.39	12.9551	286.556	1043.76	-78.3575	638.003	1041.59	-85.9451	464.823	992.336	5.70202	210.134	691.926	-82.6625	171.373	738.443	190.453	245.102	755.735	189.824	221.556	759.212	268.615	224.339	730.447	366.35	708.143	684.05	-75.8845	747.278	736.215	190.999	678.987	760.749	189.291	703.612	759.76	277.406	698.815	730.829	369.001
51	0.5	449.053	1225.39	60.892	378.516	1207.93	10.2199	520.086	1218.59	12.4215	286.79	1044.31	-79.0123	638.147	1041.6	-86.2401	464.864	992.567	5.53906	210.167	692.544	-82.3064	171.107	738.501	191.046	244.693	756.61	190.135	221.266	759.622	269.103	224.351	730.388	366.618	708.141	684.085	-75.9353	747.243	736.263	191.051	678.965	760.769	189.39	703.589	759.816	277.487	698.788	730.864	369.064
52	0.51	449.243	1225.71	60.3563	378.748	1208.19	9.60208	520.297	1218.77	11.8263	287.016	1044.82	-79.7643	638.301	1041.6	-86.5626	464.893	992.786	5.29407	210.093	693.106	-81.6138	170.714	738.745	191.658	244.203	757.736	190.624	220.815	760.182	269.567	224.152	730.446	367.056	708.071	683.995	-75.8444	747.217	736.285	191.057	678.945	760.788	189.405	703.57	759.843	277.507	698.752	730.88	369.107
53	0.52	449.412	1226.02	59.5886	378.988	1208.44	8.89913	520.513	1218.91	11.133	287.268	1045.28	-80.5922	638.446	1041.57	-86.9076	464.95	992.968	4.96854	209.955	693.659	-80.9472	170.157	739.081	192.272	243.545	759.13	191.115	220.162	760.966	270.191	223.795	730.551	367.601	708.07	683.961	-75.9565	747.204	736.287	190.994	678.926	760.784	189.36	703.56	759.848	277.435	698.697	730.865	369.059
54	0.53	449.575	1226.22	58.6302	379.253	1208.68	8.15717	520.767	1219.05	10.3893	287.551	1045.73	-81.4736	638.603	1041.51	-87.2218	465.037	993.136	4.59356	209.828	694.255	-80.2342	169.531	739.332	193.04	242.688	760.839	191.748	219.294	762.06	271.137	223.402	730.85	368.417	708.086	683.884	-76.0428	747.219	736.272	190.941	678.932	760.75	189.297	703.582	759.82	277.399	698.681	730.849	369.061
55	0.54	449.792	1226.44	57.8535	379.517	1208.93	7.36336	520.996	1219.14	9.72655	287.842	1046.14	-82.498	638.771	1041.44	-87.4564	465.147	993.269	4.23513	209.641	694.869	-79.2802	168.865	739.419	194.134	241.578	762.981	192.537	218.069	763.588	272.233	223.03	731.5	369.497	707.985	683.672	-75.8163	747.221	736.225	190.968	678.941	760.699	189.289	703.602	759.768	277.407	698.69	730.81	369.107
56	0.55	449.987	1226.72	57.1261	379.699	1209.18	6.47403	521.236	1219.24	8.93208	288.121	1046.49	-83.5972	638.935	1041.38	-87.7001	465.251	993.393	3.8253	209.439	695.445	-78.106	168.147	739.431	195.348	240.183	765.737	193.653	216.477	765.543	273.383	222.615	732.689	370.645	707.931	683.565	-75.7169	747.239	736.188	190.965	678.956	760.662	189.266	703.615	759.736	277.376	698.688	730.775	369.083
57	0.56	450.09	1226.97	56.1136	379.818	1209.46	5.47916	521.44	1219.37	8.11193	288.353	1046.82	-84.62	639.1	1041.37	-88.0067	465.326	993.528	3.33247	209.171	696.008	-76.7637	167.593	739.558	196.424	238.454	769.154	194.728	214.383	768.072	274.82	222.049	734.809	372.296	707.96	683.559	-75.8102	747.259	736.185	190.907	678.983	760.647	189.194	703.631	759.707	277.31	698.646	730.771	369.056
58	0.57	450.171	1227.3	55.2393	379.927	1209.76	4.53216	521.573	1219.55	7.44902	288.618	1047.14	-85.6064	639.245	1041.38	-88.2895	465.357	993.678	2.935	208.82	696.606	-75.3342	167.421	739.715	197.141	236.442	773.256	195.786	212.029	771.202	276.81	221.666	737.896	374.31	707.997	683.54	-75.7579	747.255	736.204	190.897	678.988	760.677	189.205	703.62	759.713	277.327	698.546	730.784	369.1
59	0.58	450.181	1227.72	54.489	380.028	1210.08	3.68539	521.637	1219.76	6.83485	288.891	1047.41	-86.6187	639.357	1041.38	-88.5587	465.351	993.852	2.57115	208.364	697.162	-73.6565	167.364	739.936	198.436	234.151	778.028	196.962	210.121	774.673	278.402	222.061	741.459	375.535	708.015	683.534	-75.6818	747.225	736.24	190.953	678.966	760.729	189.252	703.563	759.743	277.397	698.398	730.804	369.21
60	0.59	450.121	1228.13	53.6408	380.107	1210.38	2.82434	521.655	1220	6.18541	289.107	1047.68	-87.6328	639.451	1041.4	-88.8723	465.297	994.037	2.10218	207.906	697.72	-71.929	167.601	740.572	200.081	231.745	783.339	197.931	208.523	778.628	279.765	222.96	746.097	376.719	708.133	683.647	-75.7963	747.206	736.294	191.002	678.958	760.788	189.265	703.517	759.807	277.433	698.267	730.857	369.266
61	0.6	450.044	1228.5	52.9254	380.087	1210.66	1.8912	521.648	1220.2	5.52169	289.262	1047.93	-88.6258	639.539	1041.43	-89.1735	465.239	994.201	1.65398	207.457	698.244	-70.0874	168.122	741.847	201.851	229.347	789.008	198.756	207.391	783.192	281.014	224.349	751.989	377.816	708.294	683.738	-75.8902	747.204	736.354	191.016	678.958	760.834	189.262	703.474	759.841	277.429	698.133	730.875	369.299
62	0.61	449.919	1228.74	52.1323	380.019	1210.9	0.96052	521.612	1220.34	4.79908	289.401	1048.11	-89.592	639.587	1041.44	-89.4537	465.186	994.295	1.26694	206.917	698.775	-68.0305	168.758	743.916	203.836	227.133	794.892	199.393	206.718	788.396	282.43	226.088	759.071	378.775	708.412	683.786	-75.8462	747.202	736.366	191.052	678.967	760.848	189.336	703.425	759.834	277.461	697.997	730.865	369.356
63	0.62	449.742	1228.96	51.394	379.911	1211.07	0.11492	521.518	1220.44	4.14705	289.575	1048.23	-90.4921	639.606	1041.45	-89.6751	465.149	994.323	0.86642	206.336	699.26	-65.8101	169.685	746.566	205.887	225.162	800.975	199.921	206.068	793.844	283.25	228.036	767.263	379.68	708.544	683.833	-75.8019	747.201	736.325	191.094	678.97	760.827	189.368	703.384	759.799	277.501	697.833	730.835	369.372
64	0.63	449.552	1229.13	50.5606	379.796	1211.17	-0.69092	521.409	1220.53	3.54312	289.745	1048.35	-91.2943	639.615	1041.48	-89.8452	465.159	994.355	0.46006	205.808	699.709	-63.5401	171.063	749.742	207.955	223.357	807.324	200.492	205.354	799.434	283.07	230.07	776.367	380.36	708.676	683.86	-75.7379	747.229	736.264	191.091	678.996	760.775	189.362	703.364	759.739	277.48	697.623	730.805	369.371
65	0.64	449.329	1229.33	49.7908	379.671	1211.26	-1.44164	521.28	1220.65	2.95051	289.898	1048.48	-91.9956	639.613	1041.55	-90.0926	465.185	994.403	0.06164	205.274	700.247	-61.2053	172.882	753.545	209.918	221.795	813.953	200.677	205.329	806.124	283.464	232.165	786.462	380.843	708.734	683.857	-75.5556	747.274	736.218	191.069	679.042	760.738	189.297	703.379	759.677	277.42	697.445	730.783	369.344
66	0.65	449.076	1229.6	49.2083	379.464	1211.38	-2.17747	521.079	1220.78	2.43819	290.012	1048.63	-92.6819	639.576	1041.64	-90.3564	465.17	994.494	-0.2285	204.697	700.881	-58.7599	175.012	758.074	211.813	220.678	820.78	200.502	205.69	813.681	283.794	234.432	797.559	381.191	708.755	683.862	-75.4238	747.303	736.213	191.037	679.07	760.732	189.244	703.387	759.651	277.362	697.329	730.779	369.299
67	0.66	448.747	1229.83	48.701	379.177	1211.54	-2.85017	520.797	1220.96	2.04459	290.079	1048.8	-93.4065	639.507	1041.75	-90.5362	465.099	994.657	-0.36355	204.11	701.528	-56.0591	177.387	763.297	213.763	220.096	827.713	200.094	206.333	822.044	283.887	236.918	809.744	381.313	708.814	683.967	-75.4499	747.307	736.228	191.006	679.088	760.77	189.246	703.383	759.664	277.347	697.261	730.817	369.337
68	0.67	448.347	1230.06	48.29	378.846	1211.71	-3.44817	520.483	1221.13	1.64592	290.113	1048.99	-94.1421	639.39	1041.9	-90.6863	464.951	994.857	-0.40976	203.562	702.197	-53.0675	179.883	769.294	215.606	219.699	835.043	199.752	207.219	831.112	283.783	239.43	822.984	381.202	708.877	684.13	-75.5316	747.296	736.256	191.005	679.09	760.841	189.291	703.371	759.707	277.377	697.201	730.9	369.429
69	0.68	447.917	1230.27	47.8783	378.512	1211.86	-3.96666	520.121	1221.29	1.18591	290.122	1049.21	-94.875	639.243	1042.09	-90.8261	464.773	995.057	-0.50506	202.993	702.974	-49.8685	182.424	775.931	217.45	219.435	842.675	199.164	208.211	840.743	283.399	241.861	837.114	380.553	708.905	684.33	-75.579	747.27	736.287	191.03	679.095	760.95	189.346	703.343	759.775	277.423	697.147	730.96	369.477
70	0.69	447.494	1230.47	47.4174	378.185	1211.96	-4.40865	519.765	1221.45	0.78868	290.136	1049.44	-95.528	639.11	1042.27	-90.9548	464.607	995.227	-0.72015	202.51	703.85	-46.4746	185.194	783.032	219.309	219.33	850.562	198.365	209.308	850.794	282.711	244.326	851.892	379.554	709.006	684.651	-75.8111	747.259	736.32	191.082	679.093	761.052	189.369	703.333	759.828	277.451	697.129	730.997	369.475
71	0.7	447.146	1230.62	47.1149	377.881	1212.02	-4.80984	519.449	1221.57	0.51403	290.16	1049.62	-96.0962	638.977	1042.42	-91.0637	464.474	995.356	-0.91528	202.103	704.75	-42.916	188.253	790.474	221.048	219.292	858.759	197.369	210.479	861.171	281.897	246.891	867.14	378.135	709.09	684.931	-75.9692	747.266	736.328	191.092	679.099	761.079	189.442	703.357	759.844	277.47	697.167	731.002	369.504
72	0.71	446.827	1230.68	46.7398	377.438	1212.04	-5.18674	519.144	1221.62	0.20189	290.174	1049.76	-96.6203	638.829	1042.53	-91.1679	464.33	995.384	-1.19026	202.024	706.883	-40.7325	191.713	798.36	222.713	219.023	867.247	196.051	211.641	872.053	280.631	249.581	882.802	376.131	709.136	685.154	-76.0857	747.289	736.311	191.112	679.11	761.05	189.514	703.377	759.804	277.478	697.233	730.943	369.468
73	0.72	446.413	1230.64	46.0899	376.772	1212.05	-5.55718	518.811	1221.65	-0.08528	290.17	1049.87	-97.1427	638.641	1042.61	-91.2567	464.149	995.379	-1.48977	201.968	709.352	-38.6367	195.688	806.629	224.235	218.733	875.689	194.505	212.854	883.6	278.28	252.154	899.112	373.198	709.148	685.355	-76.1687	747.308	736.274	191.124	679.101	760.973	189.502	703.387	759.762	277.48	697.308	730.854	369.364
74	0.73	445.952	1230.63	45.5924	376.412	1212.06	-5.95258	518.453	1221.74	-0.28861	290.158	1049.97	-97.6775	638.428	1042.71	-91.3306	463.951	995.42	-1.70387	201.011	708.48	-31.9657	199.702	815.089	225.575	218.983	883.845	193.344	214.358	895.004	275.524	254.382	915.931	369.606	709.108	685.498	-76.2046	747.31	736.261	191.076	679.078	760.919	189.447	703.387	759.705	277.413	697.374	730.793	369.314
75	0.74	445.497	1230.71	45.4398	376.265	1212.07	-6.27928	518.035	1221.85	-0.43193	290.159	1050.12	-98.1931	638.194	1042.82	-91.3986	463.723	995.521	-1.76318	200.656	709.234	-26.8683	203.587	823.859	226.854	219.099	892.139	192.078	215.908	905.718	273.8	256.899	931.998	366.587	708.999	685.529	-76.0872	747.3	736.256	191.07	679.057	760.909	189.446	703.382	759.699	277.418	697.399	730.785	369.337
76	0.75	444.986	1230.91	45.4062	375.932	1212.12	-6.44039	517.567	1221.99	-0.58077	290.155	1050.3	-98.6774	637.943	1042.95	-91.4664	463.478	995.64	-1.7693	200.694	710.326	-21.1447	207.271	833.051	228.432	219.306	900.494	190.569	217.651	916.392	272.357	260.133	948.174	362.349	708.811	685.509	-75.8734	747.272	736.269	191.058	679.036	760.937	189.453	703.366	759.723	277.428	697.41	730.812	369.396
77	0.76	444.472	1231.15	45.3888	375.516	1212.19	-6.61252	517.108	1222.14	-0.69442	290.14	1050.54	-99.1897	637.682	1043.07	-91.587	463.269	995.765	-1.77086	200.537	711.749	-15.8674	210.824	842.623	229.91	219.749	908.871	188.88	219.356	927.445	270.436	263.087	964.425	357.65	708.647	685.523	-75.7069	747.236	736.288	191.034	679.029	760.987	189.422	703.366	759.744	277.397	697.405	730.848	369.41
78	0.77	443.977	1231.32	45.2599	374.964	1212.29	-6.78934	516.674	1222.27	-0.80928	290.121	1050.83	-99.657	637.45	1043.21	-91.6559	463.077	995.851	-1.77539	200.379	713.489	-10.9426	214.636	852.456	230.554	220.39	917.328	187.037	221.413	938.167	267.853	266.157	980.659	352.584	708.526	685.681	-75.7423	747.209	736.301	191.04	679.018	761.042	189.436	703.356	759.784	277.377	697.396	730.906	369.402
79	0.78	443.544	1231.5	45.2844	374.263	1212.36	-6.85413	516.212	1222.36	-0.8559	290.094	1051.11	-100.019	637.207	1043.35	-91.6426	462.907	995.914	-1.67758	200.226	715.399	-5.77609	218.503	862.352	231.151	221.208	925.69	185.223	223.422	949.083	265.331	269.169	996.673	346.606	708.424	685.921	-75.8614	747.18	736.295	191.044	679.013	761.094	189.522	703.353	759.81	277.427	697.398	730.93	369.441
80	0.79	443.13	1231.63	45.3096	373.874	1212.39	-7.01768	515.766	1222.45	-0.88999	290.063	1051.37	-100.353	636.938	1043.47	-91.5914	462.755	995.954	-1.61958	200.102	717.363	-0.22729	222.31	872.213	231.456	222.235	933.84	183.203	225.375	960.086	262.774	272.318	1012.32	340.269	708.379	686.201	-76.0682	747.173	736.288	191.064	679.011	761.106	189.589	703.375	759.802	277.436	697.419	730.913	369.469
81	0.8	442.641	1231.7	45.0566	373.68	1212.38	-7.31321	515.331	1222.55	-0.91511	290.072	1051.62	-100.652	636.664	1043.57	-91.5066	462.595	995.975	-1.64285	200.054	719.609	5.2766	226.044	881.972	231.428	223.363	941.867	180.937	227.777	970.878	259.356	275.633	1027.44	333.368	708.377	686.507	-76.3555	747.179	736.289	191.041	678.997	761.085	189.529	703.384	759.786	277.415	697.426	730.876	369.441
82	0.81	442.132	1231.8	44.8855	373.21	1212.38	-7.39809	514.89	1222.66	-0.90994	290.247	1051.89	-100.71	636.37	1043.66	-91.385	462.397	996.014	-1.58207	200.036	721.903	10.8662	229.78	891.808	231.323	224.66	949.691	178.698	230.408	981.413	255.629	279.238	1042.07	326.016	708.264	686.69	-76.4146	747.159	736.298	191.052	678.963	761.06	189.519	703.376	759.771	277.434	697.415	730.839	369.426
83	0.82	441.627	1231.9	44.8898	372.532	1212.38	-7.22265	514.409	1222.79	-0.81085	290.524	1052.27	-100.476	636.062	1043.77	-91.2183	462.337	996.175	-0.58336	200.106	724.431	16.3103	233.63	901.648	230.761	226.196	957.292	176.372	233.506	991.989	251.624	283.255	1055.97	318.605	708.098	686.777	-76.3161	747.113	736.298	191.086	678.909	761.032	189.583	703.353	759.769	277.462	697.38	730.827	369.449
84	0.83	441.118	1232.02	44.9423	371.964	1212.39	-7.11819	513.903	1222.92	-0.73902	290.461	1052.65	-100.625	635.745	1043.89	-91.0947	462.466	996.526	1.44712	200.226	727.111	21.6337	237.76	911.296	229.44	227.744	964.717	173.845	237.026	1002.67	247.069	287.028	1069.34	309.833	707.923	686.84	-76.2688	747.061	736.316	191.038	678.851	761.025	189.637	703.317	759.771	277.457	697.34	730.83	369.436
85	0.84	440.6	1232.15	44.9157	371.543	1212.42	-7.17684	513.432	1223.06	-0.7239	290.059	1052.81	-101.41	635.435	1044.03	-91.0484	462.296	996.747	2.0764	200.325	729.883	27.0111	241.757	920.719	228.13	229.417	972.057	171.123	240.621	1012.67	242.695	290.636	1082.23	299.645	707.729	686.894	-76.1826	747.01	736.347	190.983	678.798	761.023	189.608	703.296	759.774	277.437	697.306	730.832	369.408
86	0.85	440.074	1232.3	44.9672	371.321	1212.48	-7.26829	512.983	1223.17	-0.72747	289.972	1053.09	-101.778	635.159	1044.16	-90.9872	462.066	996.87	2.35041	200.501	732.766	32.3656	245.804	929.922	226.559	231.286	979.172	168.377	244.65	1022.23	238.441	296.134	1094.26	292.957	707.522	686.909	-76.027	746.992	736.333	190.939	678.778	761.023	189.575	703.299	759.76	277.425	697.297	730.843	369.438
87	0.86	439.572	1232.45	44.9921	370.873	1212.58	-7.20136	512.528	1223.25	-0.72246	289.979	1053.42	-102.043	634.911	1044.25	-90.8815	461.837	996.905	2.34233	200.723	735.763	37.6771	250.002	938.851	225	233.294	986.066	165.626	248.594	1031.42	233.93	301.268	1105.6	284.709	707.362	686.982	-75.9937	746.988	736.315	190.919	678.786	761.017	189.575	703.333	759.743	277.436	697.315	730.844	369.492
88	0.87	439.098	1232.61	45.0626	370.246	1212.64	-7.14882	512.086	1223.33	-0.67629	290.001	1053.79	-102.259	634.628	1044.37	-90.7654	461.626	996.872	2.19435	200.916	738.881	42.9169	254.374	947.5	223.252	235.413	992.69	162.855	252.613	1040.2	229.339	306.33	1116.28	275.893	707.168	687.13	-75.9789	746.976	736.296	190.892	678.792	761.03	189.609	703.37	759.741	277.437	697.34	730.834	369.494
89	0.88	438.633	1232.76	44.969	369.733	1212.71	-7.20898	511.648	1223.43	-0.58018	290.107	1054.22	-102.487	634.333	1044.49	-90.6077	461.442	996.834	2.08638	201.165	741.994	48.0922	258.759	955.584	220.979	237.669	998.978	159.979	256.673	1048.55	224.456	311.401	1126.28	266.919	707.036	687.386	-76.1315	746.974	736.269	190.883	678.793	761.042	189.605	703.399	759.732	277.417	697.355	730.807	369.447
90	0.89	438.165	1232.91	44.9594	369.416	1212.77	-7.28962	511.203	1223.58	-0.41415	290.183	1054.73	-102.807	634.041	1044.6	-90.4153	461.27	996.875	2.13835	201.482	745.004	53.0903	263.179	963.356	218.742	239.945	1004.87	157.375	260.777	1056.41	219.509	316.577	1135.54	257.947	706.932	687.654	-76.3628	746.974	736.27	190.88	678.788	761.048	189.622	703.415	759.73	277.424	697.358	730.792	369.465
91	0.9	437.647	1233.07	45.0053	369.133	1212.84	-7.37014	510.734	1223.77	-0.2204	290.004	1055.16	-103.101	633.768	1044.68	-90.2123	461.097	996.984	2.3515	201.785	747.973	57.6832	267.627	970.832	216.476	242.217	1010.48	154.893	264.943	1063.76	214.71	321.801	1144.06	248.771	706.806	687.848	-76.5063	746.952	736.292	190.89	678.754	761.052	189.68	703.416	759.754	277.461	697.324	730.817	369.513
92	0.91	437.092	1233.27	45.0221	368.516	1212.94	-7.29449	510.272	1223.95	-0.0635	290.098	1055.54	-103.353	633.496	1044.76	-90.0338	460.899	997.101	2.57038	201.93	750.878	61.9389	272.121	977.835	214.044	244.84	1015.75	152.045	269.191	1070.61	209.908	327.064	1151.9	239.534	706.654	687.949	-76.5178	746.895	736.328	190.91	678.682	761.069	189.732	703.374	759.778	277.481	697.267	730.853	369.537
93	0.92	436.553	1233.53	45.0755	368.044	1213.04	-7.30584	509.844	1224.11	0.08429	290.207	1056.04	-103.67	633.24	1044.83	-89.9236	460.722	997.234	2.77668	202.035	753.626	66.0762	276.555	984.29	211.244	247.393	1020.59	149.37	273.47	1076.97	205.07	332.271	1158.99	230.44	706.519	687.977	-76.4562	746.841	736.363	190.902	678.624	761.068	189.735	703.329	759.797	277.498	697.22	730.874	369.605
94	0.93	436.086	1233.77	45.0708	367.653	1213.15	-7.44038	509.443	1224.24	0.19183	289.944	1056.68	-103.848	633.007	1044.89	-89.8758	460.543	997.362	2.97156	202.537	756.803	70.1789	281.087	990.308	208.59	249.918	1025.05	146.999	277.667	1082.75	200.156	337.384	1165.35	221.631	706.383	687.993	-76.4572	746.793	736.361	190.877	678.578	761.041	189.728	703.312	759.802	277.504	697.181	730.872	369.653
95	0.94	435.645	1233.97	44.9263	367.307	1213.27	-7.56953	509.102	1224.35	0.25028	290.005	1057.14	-103.932	632.817	1044.92	-89.8116	460.404	997.464	3.17179	203.107	760.376	74.3622	285.656	995.844	205.946	252.659	1029.18	144.369	281.818	1087.99	195.423	342.433	1171.02	213.054	706.212	688.004	-76.4626	746.749	736.343	190.851	678.541	761.02	189.724	703.309	759.799	277.503	697.159	730.869	369.658
96	0.95	435.287	1234.19	44.8229	367.012	1213.42	-7.64519	508.811	1224.44	0.27137	290.053	1057.38	-103.804	632.664	1044.93	-89.781	460.308	997.491	3.2139	203.838	763.364	78.0752	290.259	1000.83	203.031	255.464	1032.9	141.87	286.018	1092.73	190.945	347.37	1175.96	204.725	706.031	687.944	-76.3737	746.746	736.301	190.806	678.576	760.999	189.711	703.36	759.79	277.455	697.208	730.849	369.633
97	0.96	435.015	1234.44	44.7543	366.755	1213.55	-7.77016	508.562	1224.57	0.25762	290.044	1057.37	-103.506	632.519	1044.94	-89.7601	460.236	997.497	3.17523	204.666	766.069	81.5394	294.882	1005.18	199.835	258.374	1036.31	139.316	290.355	1096.91	186.471	352.258	1180.24	196.843	705.863	687.89	-76.3114	746.785	736.267	190.764	678.616	760.98	189.71	703.439	759.787	277.41	697.277	730.808	369.586
98	0.97	434.705	1234.67	44.5868	366.495	1213.67	-7.9194	508.298	1224.74	0.23239	290.29	1057.53	-103.416	632.364	1044.96	-89.7513	460.175	997.537	3.12932	205.487	768.544	84.7161	299.43	1009.01	196.598	261.23	1039.22	136.911	295.044	1100.6	182.18	357.06	1183.84	189.151	705.663	687.919	-76.3792	746.789	736.251	190.714	678.604	760.973	189.696	703.482	759.798	277.383	697.305	730.772	369.524
99	0.98	434.394	1234.98	44.6864	366.249	1213.79	-8.04432	508.039	1224.93	0.2361	290.567	1057.75	-103.316	632.184	1044.98	-89.7298	460.095	997.647	3.25859	206.398	770.408	87.9818	303.846	1012.35	193.462	264.082	1041.8	134.584	299.473	1103.82	178.004	361.819	1186.83	181.723	705.497	688.017	-76.5185	746.745	736.255	190.696	678.547	760.958	189.716	703.46	759.812	277.392	697.287	730.792	369.538
100	0.99	434.086	1235.27	44.725	366.03	1213.92	-8.12509	507.795	1225.15	0.30127	290.812	1058.01	-103.242	632.016	1045	-89.6693	460.049	997.84	3.56474	207.465	771.563	91.4801	308.16	1015.35	190.49	266.922	1044.03	132.412	303.783	1106.57	173.917	366.574	1189.22	174.666	705.32	688.005	-76.4639	746.678	736.262	190.717	678.488	760.934	189.77	703.419	759.824	277.44	697.25	730.823	369.634
101	1	433.852	1235.54	44.6264	365.855	1214.06	-8.19271	507.577	1225.35	0.33759	290.978	1058.28	-103.191	631.879	1045.02	-89.6349	459.85	997.915	3.18151	208.395	773.266	94.0811	312.339	1017.94	187.611	269.737	1045.95	130.246	308.093	1108.93	169.865	371.43	1190.99	167.816	705.152	688.024	-76.4907	746.627	736.292	190.711	678.431	760.934	189.775	703.386	759.871	277.452	697.215	730.844	369.676
102	1.01	433.647	1235.83	44.352	365.711	1214.21	-8.31229	507.424	1225.55	0.30841	291.127	1058.55	-103.134	631.749	1045.05	-89.6435	459.482	997.841	1.93326	209.16	775.149	95.981	316.404	1020.09	184.724	272.307	1047.72	128.281	312.381	1110.88	165.792	376.31	1192.27	161.146	705.036	688.146	-76.6944	746.59	736.324	190.665	678.382	760.95	189.759	703.368	759.925	277.414	697.207	730.857	369.634
103	1.02	433.526	1236.09	44.2923	365.64	1214.36	-8.35557	507.332	1225.65	0.27064	291.321	1058.82	-103.054	631.679	1045.07	-89.6323	459.495	998.009	1.9442	210.027	776.906	97.5218	320.384	1021.78	181.834	274.655	1049.32	126.723	316.682	1112.45	161.919	381.275	1193.02	154.476	704.959	688.191	-76.7559	746.572	736.317	190.661	678.359	760.946	189.782	703.376	759.934	277.404	697.22	730.86	369.597
104	1.03	433.487	1236.36	44.3023	365.641	1214.51	-8.35696	507.287	1225.72	0.23911	291.572	1059.05	-103.016	631.653	1045.07	-89.6002	459.604	998.105	2.13214	211.069	777.868	99.5169	324.349	1023.06	178.914	277.339	1050.45	124.796	320.972	1113.63	158.175	386.212	1193.31	148.223	704.91	688.19	-76.7547	746.569	736.281	190.675	678.369	760.92	189.858	703.4	759.918	277.442	697.281	730.84	369.633
105	1.04	433.445	1236.61	44.1358	365.688	1214.65	-8.41097	507.257	1225.77	0.15305	291.913	1059.21	-103.151	631.645	1045.07	-89.6185	459.678	998.097	2.0148	212.043	778.973	100.876	328.191	1024.04	175.83	280.105	1051.28	122.663	325.16	1114.46	154.325	390.95	1193.25	142.094	704.851	688.184	-76.7732	746.584	736.239	190.691	678.393	760.906	189.843	703.447	759.903	277.428	697.359	730.834	369.628
106	1.05	433.419	1236.82	43.8803	365.722	1214.8	-8.54264	507.251	1225.87	0.0111	291.602	1059	-102.408	631.652	1045.06	-89.6696	459.741	998.001	1.81151	212.974	779.883	101.886	331.91	1024.73	172.601	282.75	1051.84	120.507	329.127	1115.3	150.53	395.308	1192.92	135.918	704.792	688.164	-76.7296	746.621	736.215	190.645	678.428	760.896	189.774	703.506	759.891	277.375	697.425	730.795	369.508
107	1.06	433.381	1237.07	43.6915	365.764	1214.93	-8.61747	507.244	1225.99	-0.09719	290.578	1058.36	-100.516	631.681	1045.05	-89.7091	459.813	997.891	1.76842	213.872	780.707	102.779	335.465	1025.1	169.596	285.324	1052.18	118.459	332.785	1116.13	147.018	399.338	1192.36	129.997	704.733	688.094	-76.6216	746.649	736.202	190.641	678.452	760.876	189.759	703.552	759.872	277.333	697.466	730.776	369.493
108	1.07	433.356	1237.33	43.626	365.807	1215.07	-8.68432	507.215	1226.11	-0.17197	290.987	1058.32	-100.565	631.691	1045.05	-89.739	459.859	997.761	1.84963	214.775	781.282	103.611	338.837	1025.4	166.923	287.792	1052.34	116.456	336.174	1116.29	143.446	403.308	1191.58	124.307	704.672	688.025	-76.5587	746.64	736.207	190.599	678.449	760.86	189.762	703.552	759.879	277.336	697.463	730.806	369.561
109	1.08	433.312	1237.6	43.4626	365.8	1215.2	-8.87128	507.186	1226.26	-0.24665	291.705	1058.4	-101.124	631.693	1045.04	-89.7868	459.854	997.593	1.78397	215.608	781.697	104.217	341.868	1025.57	164.279	290.135	1052.34	114.415	339.415	1116.16	139.756	406.872	1190.69	119.01	704.636	688.005	-76.5885	746.627	736.206	190.532	678.427	760.858	189.763	703.526	759.892	277.325	697.409	730.817	369.54
110	1.09	433.243	1237.89	43.1775	365.848	1215.34	-9.10579	507.173	1226.41	-0.37853	292.479	1058.49	-101.804	631.7	1045.03	-89.8808	459.84	997.401	1.66666	216.465	782.018	104.674	344.615	1025.49	161.446	292.309	1052.19	112.26	342.362	1115.91	136.261	410.183	1189.61	113.89	704.618	687.999	-76.6032	746.62	736.232	190.504	678.399	760.87	189.711	703.507	759.91	277.291	697.342	730.827	369.537
111	1.1	433.253	1238.2	43.0219	365.942	1215.46	-9.25893	507.159	1226.56	-0.52162	293.247	1058.56	-102.374	631.741	1045.04	-89.9574	459.351	996.093	-0.05743	217.423	782.195	104.993	347.419	1025.43	159.746	294.341	1051.96	110.224	345.14	1115.58	132.898	413.328	1188.48	109.255	704.641	688.001	-76.5729	746.593	736.243	190.505	678.402	760.898	189.767	703.503	759.928	277.324	697.294	730.856	369.581
112	1.11	433.331	1238.53	42.9071	366.091	1215.59	-9.38221	507.183	1226.68	-0.6823	294.013	1058.6	-102.868	631.84	1045.05	-89.977	458.267	993.384	-3.96462	218.412	782.276	105.258	350.369	1025.5	159.491	296.256	1051.65	108.32	347.796	1115.23	129.772	416.219	1187.28	105.097	704.733	688.061	-76.6594	746.593	736.245	190.572	678.433	760.942	189.833	703.51	759.942	277.389	697.281	730.883	369.634
113	1.12	433.435	1238.85	42.7019	366.292	1215.74	-9.56385	507.252	1226.77	-0.90603	294.704	1058.62	-103.341	631.992	1045.03	-89.9972	458.155	992.68	-4.73372	219.311	782.244	105.42	352.722	1025.12	157.451	298.034	1051.24	106.518	350.224	1114.76	126.77	418.822	1186.06	101.102	704.878	688.142	-76.7635	746.631	736.217	190.628	678.492	760.949	189.826	703.55	759.939	277.384	697.298	730.879	369.613
114	1.13	433.549	1239.06	42.4235	366.476	1215.87	-9.84304	507.361	1226.83	-1.14785	295.33	1058.63	-103.794	632.169	1045.02	-90.0619	458.32	992.475	-4.77388	220.236	782.133	105.452	354.891	1024.53	154.968	299.68	1050.77	104.797	352.413	1114.23	124.122	421.075	1184.88	97.1895	705.023	688.16	-76.7836	746.709	736.184	190.602	678.572	760.937	189.793	703.611	759.899	277.325	697.332	730.844	369.552
115	1.14	433.671	1239.22	42.2899	366.644	1215.91	-10.1064	507.489	1226.87	-1.34961	295.275	1058.78	-103.813	632.341	1045	-90.094	458.566	992.461	-4.53464	221.19	781.966	105.317	356.995	1024.01	152.828	301.166	1050.26	103.261	354.421	1113.5	121.807	422.998	1183.77	93.523	705.189	688.165	-76.8077	746.789	736.151	190.595	678.63	760.926	189.772	703.668	759.883	277.299	697.36	730.82	369.531
116	1.15	433.755	1239.3	42.1358	366.771	1215.9	-10.3243	507.613	1226.85	-1.49353	294.269	1059.13	-103.252	632.484	1044.98	-90.1142	458.775	992.548	-4.29039	222.047	781.698	105.076	358.988	1023.5	150.765	302.513	1049.71	101.928	356.38	1112.64	119.716	424.604	1182.75	89.9415	705.322	688.064	-76.6933	746.841	736.153	190.594	678.675	760.937	189.768	703.706	759.895	277.31	697.363	730.811	369.537
117	1.16	433.822	1239.34	41.9089	366.843	1215.9	-10.5922	507.748	1226.88	-1.66432	294.085	1059.16	-103.156	632.585	1044.97	-90.1688	458.924	992.71	-4.29114	222.878	781.346	104.798	360.793	1023	148.623	303.723	1049.12	100.451	357.925	1111.99	117.567	425.924	1181.87	86.4818	705.456	687.965	-76.5711	746.862	736.17	190.566	678.696	760.939	189.735	703.692	759.901	277.288	697.305	730.821	369.526
118	1.17	433.891	1239.42	41.7146	366.906	1215.9	-10.873	507.876	1226.94	-1.83795	294.104	1059.1	-103.176	632.674	1044.95	-90.2525	459.047	992.896	-4.40904	223.601	781.015	104.51	362.466	1022.57	146.488	304.783	1048.49	98.8383	359.208	1111.41	115.454	426.993	1181.05	82.9164	705.594	687.886	-76.4935	746.863	736.187	190.54	678.698	760.935	189.676	703.665	759.899	277.251	697.204	730.843	369.499
119	1.18	433.988	1239.51	41.6156	366.829	1215.81	-10.5103	507.995	1226.99	-1.95038	294.191	1059.03	-103.216	632.796	1044.94	-90.3394	459.198	993.072	-4.48524	224.223	780.736	104.205	363.993	1022.18	144.352	305.76	1047.9	97.2524	360.337	1110.84	113.297	427.702	1180.32	79.4957	705.754	687.834	-76.4443	746.855	736.18	190.579	678.708	760.933	189.688	703.631	759.892	277.251	697.101	730.861	369.582
120	1.19	434.121	1239.53	41.4724	366.58	1215.57	-9.57925	508.15	1227	-2.06822	294.323	1058.95	-103.286	632.96	1044.91	-90.4095	459.359	993.149	-4.62919	224.903	780.467	104.007	365.423	1021.71	141.854	306.661	1047.3	95.5825	361.333	1110.29	110.949	427.986	1179.72	76.7128	705.92	687.828	-76.4267	746.888	736.158	190.644	678.754	760.924	189.731	703.614	759.872	277.253	696.994	730.878	369.653
121	1.2	434.385	1239.54	41.3171	366.839	1215.33	-9.63667	508.36	1226.96	-2.23684	294.477	1058.9	-103.391	633.139	1044.87	-90.4551	459.521	993.138	-4.97074	225.563	780.263	103.89	366.829	1021.29	139.244	307.54	1046.71	93.6178	362.113	1109.76	108.458	427.943	1179.53	74.9257	706.094	687.871	-76.4443	746.955	736.112	190.654	678.813	760.921	189.709	703.645	759.853	277.231	696.909	730.877	369.626
122	1.21	434.66	1239.45	40.9999	367.342	1214.97	-9.8426	508.584	1226.92	-2.42691	294.636	1058.88	-103.512	633.325	1044.84	-90.5161	459.622	993.079	-5.38519	226.155	780.115	103.727	367.986	1020.85	136.43	308.371	1046.18	91.448	362.727	1109.26	105.863	427.71	1179.76	74.0008	706.3	687.922	-76.5039	747.037	736.085	190.667	678.894	760.92	189.659	703.699	759.844	277.218	696.896	730.853	369.524
123	1.22	434.88	1239.41	40.835	367.63	1214.93	-10.0124	508.78	1226.87	-2.63517	294.813	1058.88	-103.681	633.525	1044.83	-90.5502	459.69	993.031	-5.66765	226.721	779.959	103.465	368.964	1020.57	134.255	309.197	1045.66	89.2758	363.136	1108.78	103.53	427.403	1180.1	73.4334	706.492	687.941	-76.5387	747.084	736.082	190.654	678.936	760.927	189.642	703.729	759.858	277.244	696.914	730.849	369.498
124	1.23	435.031	1239.35	40.636	367.84	1214.93	-10.1161	508.95	1226.82	-2.78772	294.981	1058.87	-103.917	633.687	1044.79	-90.5606	459.706	993.049	-5.84557	227.252	779.745	103.078	369.786	1020.4	132.734	309.987	1045.16	87.4463	363.207	1108.51	101.943	427.124	1180.42	73.0801	706.651	687.892	-76.4876	747.079	736.085	190.695	678.943	760.95	189.655	703.71	759.877	277.261	696.897	730.87	369.538
125	1.24	435.247	1239.35	40.514	367.904	1215.07	-10.2227	509.13	1226.82	-2.94576	295.112	1058.88	-104.131	633.806	1044.74	-90.5674	459.702	993.152	-5.90972	227.649	779.527	102.702	370.422	1020.21	131.699	310.687	1044.61	85.9756	363.378	1108.12	100.533	426.904	1180.62	72.6038	706.836	687.822	-76.4637	747.054	736.117	190.722	678.916	760.971	189.67	703.666	759.898	277.252	696.856	730.901	369.576
126	1.25	435.496	1239.39	40.3098	367.822	1215.43	-10.358	509.341	1226.83	-3.18852	295.223	1058.92	-104.367	633.899	1044.69	-90.61	459.72	993.292	-5.89451	227.887	779.332	102.288	370.996	1019.98	130.95	311.317	1044.1	84.7965	363.649	1107.73	99.5792	426.865	1180.64	71.9813	706.993	687.731	-76.4783	747.02	736.162	190.717	678.871	760.976	189.688	703.595	759.922	277.257	696.798	730.929	369.576
127	1.26	435.743	1239.47	40.0572	368.126	1215.42	-10.7316	509.583	1226.84	-3.50623	295.335	1058.98	-104.595	634.01	1044.61	-90.6754	459.762	993.392	-5.79796	228	779.186	101.704	371.643	1019.67	130.463	311.932	1043.63	84.0967	364.02	1107.35	99.0456	427.051	1180.46	71.3402	707.093	687.58	-76.3425	747.001	736.172	190.721	678.838	760.961	189.67	703.54	759.925	277.258	696.757	730.947	369.585
128	1.27	436.021	1239.48	39.6895	368.704	1215.15	-11.233	509.864	1226.83	-3.83165	295.451	1059.05	-104.757	634.147	1044.52	-90.7217	459.866	993.404	-5.67139	228.044	779.107	100.973	372.296	1019.22	130.077	312.635	1043.14	83.5283	364.489	1106.94	98.6619	427.473	1180.07	70.7221	707.184	687.432	-76.2302	747.015	736.142	190.754	678.844	760.909	189.687	703.555	759.909	277.272	696.781	730.919	369.621
129	1.28	436.371	1239.49	39.2856	368.964	1215.28	-11.676	510.204	1226.77	-4.22993	295.55	1059.16	-104.899	634.286	1044.43	-90.7646	460	993.361	-5.61759	228.08	779.104	100.361	372.827	1018.66	129.569	313.32	1042.73	83.1845	365.042	1106.58	98.3817	428.081	1179.61	70.137	707.267	687.314	-76.1732	747.05	736.089	190.753	678.88	760.861	189.644	703.586	759.87	277.261	696.828	730.864	369.582
130	1.29	436.689	1239.51	39.0038	368.954	1215.65	-11.9272	510.52	1226.7	-4.63344	295.639	1059.29	-105.062	634.443	1044.35	-90.8238	460.133	993.266	-5.70859	228.091	779.181	99.9034	373.267	1018.23	129.278	313.901	1042.48	82.9952	365.563	1106.36	98.2284	428.746	1179.16	69.6045	707.302	687.251	-76.1415	747.087	736.036	190.732	678.908	760.829	189.598	703.636	759.858	277.253	696.886	730.827	369.523
131	1.3	436.971	1239.49	38.6708	369.13	1215.76	-12.1545	510.799	1226.63	-4.96633	295.748	1059.39	-105.225	634.609	1044.24	-90.8704	460.227	993.241	-5.74749	228.106	779.326	99.6291	373.606	1018.04	129.244	314.42	1042.38	82.7663	366.01	1106.3	98.179	429.356	1178.77	69.2064	707.329	687.178	-76.1615	747.105	736.01	190.764	678.938	760.838	189.582	703.656	759.858	277.244	696.924	730.809	369.514
132	1.31	437.261	1239.52	38.6087	369.526	1215.66	-12.4493	511.048	1226.61	-5.18959	295.875	1059.46	-105.377	634.748	1044.15	-90.9556	460.28	993.323	-5.64258	228.129	779.484	99.53	373.784	1018.14	129.347	314.799	1042.39	82.4484	366.348	1106.39	98.0418	429.818	1178.57	68.921	707.375	687.093	-76.1656	747.095	736.025	190.786	678.95	760.87	189.623	703.639	759.874	277.268	696.921	730.847	369.559
133	1.32	437.534	1239.52	38.6109	370.105	1215.35	-12.9076	511.269	1226.6	-5.34935	295.977	1059.53	-105.512	634.853	1044.1	-91.0252	460.307	993.452	-5.60527	228.146	779.718	99.5044	373.767	1018.56	129.562	314.976	1042.49	82.0008	366.453	1106.61	97.7022	430.096	1178.55	68.6458	707.4	687.051	-76.2391	747.07	736.074	190.783	678.929	760.887	189.651	703.607	759.923	277.289	696.894	730.904	369.605
134	1.33	437.746	1239.43	38.4274	370.436	1215.23	-13.1408	511.51	1226.55	-5.45495	296.048	1059.58	-105.62	634.929	1044.02	-91.1232	460.316	993.56	-5.71181	228.166	779.997	99.4545	373.611	1019.18	129.849	314.989	1042.64	81.5685	366.35	1106.94	97.2015	430.202	1178.62	68.2263	707.418	686.996	-76.3027	747.036	736.137	190.767	678.877	760.902	189.632	703.583	759.959	277.295	696.859	730.944	369.613
135	1.34	437.999	1239.31	38.2875	370.662	1215.17	-13.2356	511.752	1226.43	-5.48167	296.131	1059.64	-105.714	635.008	1043.94	-91.1974	460.333	993.641	-5.90641	228.245	780.286	99.5305	373.389	1019.71	129.958	314.873	1042.88	81.1568	366.147	1107.3	96.7444	430.201	1178.68	67.7153	707.366	686.842	-76.2011	747.015	736.17	190.802	678.849	760.907	189.648	703.57	759.981	277.318	696.84	730.95	369.619
136	1.35	438.263	1239.12	38.2427	370.736	1215.33	-13.1758	511.963	1226.27	-5.48677	296.245	1059.73	-105.8	635.112	1043.84	-91.2359	460.365	993.704	-6.12325	228.37	780.57	99.7449	373.102	1020.12	129.771	314.683	1043.17	80.791	365.863	1107.7	96.2971	430.128	1178.81	67.2655	707.334	686.718	-76.2001	747.015	736.145	190.828	678.851	760.887	189.665	703.575	759.973	277.344	696.85	730.917	369.625
137	1.36	438.524	1238.96	38.3041	370.628	1215.74	-13.0333	512.171	1226.1	-5.51596	296.356	1059.83	-105.913	635.236	1043.73	-91.2896	460.415	993.713	-6.43971	228.478	780.862	99.9353	372.818	1020.49	129.346	314.471	1043.48	80.4391	365.534	1108.08	95.7498	429.997	1179.03	66.8254	707.296	686.63	-76.2864	747.035	736.075	190.777	678.871	760.838	189.666	703.625	759.937	277.314	696.896	730.858	369.594
138	1.37	438.731	1238.83	38.2458	370.743	1215.83	-13.0779	512.373	1225.94	-5.5246	296.472	1059.97	-106.032	635.359	1043.62	-91.3868	460.468	993.62	-6.93438	228.524	781.183	100.027	372.555	1020.86	128.818	314.263	1043.77	80.0506	365.211	1108.44	95.2055	429.827	1179.26	66.3133	707.194	686.48	-76.2542	747.066	736	190.718	678.899	760.791	189.572	703.682	759.873	277.228	696.954	730.8	369.516
139	1.38	438.834	1238.72	38.0437	370.898	1215.89	-13.1599	512.543	1225.82	-5.50869	296.594	1060.12	-106.139	635.446	1043.53	-91.4423	460.528	993.599	-7.20442	228.501	781.541	100.116	372.292	1021.27	128.571	314.076	1044.08	79.8166	364.94	1108.81	94.8706	429.665	1179.56	66.0574	707.046	686.286	-76.1419	747.066	735.953	190.675	678.903	760.77	189.517	703.715	759.842	277.162	696.979	730.755	369.448
140	1.39	438.877	1238.76	38.0894	371.02	1216.03	-13.2118	512.641	1225.76	-5.38433	296.699	1060.27	-106.197	635.506	1043.47	-91.4182	460.542	993.704	-7.17117	228.444	781.871	100.27	372.048	1021.75	128.722	313.904	1044.4	79.7801	364.728	1109.16	94.7592	429.532	1179.88	66.0563	706.888	686.119	-76.0437	747.019	735.95	190.649	678.884	760.787	189.558	703.702	759.875	277.189	696.959	730.767	369.46
141	1.4	438.841	1238.81	38.1358	371.105	1216.16	-13.2766	512.69	1225.76	-5.22	296.785	1060.41	-106.254	635.539	1043.44	-91.388	460.521	993.856	-7.01879	228.354	782.162	100.378	371.863	1022.22	129.085	313.771	1044.73	79.8764	364.576	1109.49	94.7604	429.434	1180.13	66.052	706.765	685.976	-75.9856	746.96	735.98	190.639	678.834	760.815	189.572	703.666	759.934	277.215	696.917	730.836	369.529
142	1.41	438.786	1238.85	38.0706	371.19	1216.29	-13.4399	512.741	1225.77	-5.07082	296.883	1060.53	-106.3	635.569	1043.42	-91.3672	460.482	993.971	-6.90004	228.198	782.449	100.328	371.71	1022.62	129.527	313.703	1045.03	80.1563	364.494	1109.81	94.8506	429.415	1180.31	66.085	706.708	685.921	-76.0576	746.91	736.027	190.618	678.783	760.818	189.534	703.62	759.957	277.218	696.863	730.895	369.563
143	1.42	438.777	1238.88	38.0145	371.413	1216.21	-13.6691	512.81	1225.77	-4.92053	297	1060.63	-106.35	635.613	1043.39	-91.325	460.48	994.039	-6.82427	228.013	782.754	100.298	371.593	1022.98	130.197	313.651	1045.31	80.5724	364.482	1110.1	95.1456	429.487	1180.42	66.1258	706.693	685.929	-76.1906	746.895	736.076	190.62	678.731	760.836	189.538	703.58	759.976	277.201	696.823	730.942	369.617
144	1.43	438.806	1238.9	38.1199	371.842	1215.86	-13.8992	512.895	1225.74	-4.77758	297.116	1060.73	-106.415	635.679	1043.35	-91.2022	460.523	994.076	-6.70395	227.786	783.078	100.264	371.445	1023.28	130.955	313.613	1045.6	81.1085	364.525	1110.42	95.742	429.73	1180.47	66.3295	706.676	685.954	-76.3116	746.894	736.108	190.645	678.702	760.84	189.587	703.566	760.01	277.251	696.804	730.961	369.66
145	1.44	438.896	1238.86	38.2207	371.878	1215.98	-13.8447	512.989	1225.64	-4.66104	297.26	1060.81	-106.491	635.749	1043.3	-91.0749	460.599	994.09	-6.57023	227.548	783.365	100.257	371.249	1023.54	131.764	313.565	1045.92	81.8659	364.609	1110.74	96.5558	430.083	1180.39	66.5704	706.652	685.938	-76.3033	746.922	736.105	190.688	678.732	760.821	189.63	703.593	760.004	277.328	696.833	730.938	369.644
146	1.45	438.996	1238.73	38.2961	371.659	1216.37	-13.6362	513.113	1225.48	-4.55403	297.423	1060.86	-106.603	635.817	1043.24	-90.948	460.692	994.026	-6.52961	227.329	783.609	100.251	371.024	1023.69	132.608	313.492	1046.28	82.8717	364.747	1111.01	97.449	430.471	1180.22	66.7773	706.699	685.94	-76.3915	746.961	736.049	190.746	678.77	760.776	189.61	703.637	759.955	277.327	696.884	730.863	369.606
147	1.46	439.097	1238.6	38.3745	371.665	1216.46	-13.5284	513.249	1225.29	-4.42474	297.611	1060.9	-106.783	635.881	1043.19	-90.8727	460.814	993.975	-6.43144	227.145	783.851	100.186	370.709	1023.85	133.704	313.375	1046.64	83.9367	364.859	1111.29	98.5808	430.94	1179.99	67.0198	706.677	685.87	-76.3631	746.991	735.979	190.751	678.789	760.735	189.579	703.682	759.912	277.293	696.93	730.79	369.562
148	1.47	439.228	1238.52	38.6256	371.733	1216.43	-13.3706	513.363	1225.15	-4.22902	297.826	1060.94	-106.978	635.944	1043.16	-90.805	460.932	993.963	-6.21831	226.999	784.054	100.047	370.242	1024.14	135.193	313.129	1047.08	85.1797	364.909	1111.61	99.967	431.451	1179.74	67.4597	706.617	685.767	-76.2716	746.997	735.931	190.725	678.814	760.718	189.598	703.712	759.881	277.269	696.973	730.77	369.552
149	1.48	439.301	1238.49	38.9019	371.777	1216.4	-13.1822	513.443	1225.06	-4.00393	298.09	1061.01	-107.12	636.014	1043.15	-90.763	461.028	993.943	-5.95081	226.88	784.215	99.7713	369.606	1024.5	136.963	312.73	1047.57	86.6142	364.83	1111.95	101.35	431.924	1179.5	68.2173	706.542	685.624	-76.0731	747.005	735.942	190.678	678.827	760.738	189.599	703.711	759.885	277.246	696.986	730.784	369.554
150	1.49	439.291	1238.39	39.2107	371.907	1216.21	-13.0092	513.47	1225.02	-3.76233	298.356	1061.08	-107.217	636.055	1043.17	-90.7448	461.051	993.893	-5.7178	226.76	784.328	99.4053	368.722	1024.84	138.954	312.242	1048.06	88.0987	364.566	1112.34	103.065	432.326	1179.32	69.5422	706.496	685.548	-75.9817	746.973	735.992	190.641	678.81	760.779	189.555	703.677	759.928	277.205	696.947	730.846	369.551
151	1.5	439.25	1238.34	39.5483	372.426	1215.94	-13.4036	513.448	1224.97	-3.46458	298.611	1061.18	-107.3	636.067	1043.2	-90.7255	460.999	993.806	-5.55572	226.604	784.308	98.9626	367.541	1025.15	141.28	311.668	1048.49	89.7373	364.194	1112.62	105.062	432.638	1179.21	71.7415	706.515	685.547	-76.0045	746.91	736.04	190.619	678.764	760.822	189.536	703.615	759.969	277.203	696.871	730.916	369.617
152	1.51	439.217	1238.17	39.7813	372.842	1216.32	-14.4051	513.461	1224.89	-3.13367	298.88	1061.3	-107.324	636.117	1043.21	-90.6597	460.93	993.59	-5.55692	226.387	784.11	98.497	366.134	1025.16	143.881	311.02	1048.78	91.7014	363.624	1112.74	107.704	432.86	1179.21	75.305	706.589	685.591	-76.0615	746.854	736.054	190.665	678.725	760.841	189.56	703.566	759.979	277.262	696.789	730.954	369.698
153	1.52	439.287	1237.96	40.049	372.581	1216.65	-14.0652	513.526	1224.77	-2.87349	299.158	1061.45	-107.391	636.205	1043.21	-90.6228	461.496	994.354	-3.73794	226.083	783.74	97.8284	364.516	1025.1	146.38	310.425	1048.9	93.807	362.858	1112.72	111.059	432.764	1179.29	80.6359	706.698	685.7	-76.1615	746.868	736.047	190.738	678.735	760.835	189.605	703.556	759.969	277.318	696.769	730.953	369.743
154	1.53	439.398	1237.68	40.1688	372.6	1216.65	-13.9184	513.873	1224.59	-2.28499	299.482	1061.64	-107.511	636.339	1043.19	-90.6128	462.935	996.596	0.64166	225.604	783.505	96.5145	362.48	1024.83	148.536	309.811	1048.79	96.2953	361.859	1112.47	115.203	433.085	1179.91	89.2731	706.819	685.836	-76.3249	746.931	736.041	190.773	678.796	760.834	189.612	703.606	759.961	277.309	696.815	730.896	369.666
155	1.54	439.581	1237.49	40.2352	372.704	1216.55	-13.8441	514.525	1224.37	-1.18072	300.184	1061.41	-107.466	636.497	1043.17	-90.6424	463.399	997.025	1.50274	224.94	783.456	94.6499	360.006	1023.31	151.223	309.087	1048.45	99.2165	360.496	1112.08	119.985	433.815	1180.95	101.159	706.922	685.876	-76.3803	747.021	736.008	190.756	678.878	760.865	189.594	703.676	759.948	277.296	696.875	730.837	369.608
156	1.55	439.733	1237.36	40.2511	372.842	1216.46	-13.7703	514.819	1224.27	-0.76887	300.926	1061.04	-107.329	636.646	1043.14	-90.686	463.637	997.091	1.67692	224.13	782.95	93.0798	357.365	1021.98	155.514	308.159	1047.92	102.676	358.929	1111.55	125.671	432.566	1180.55	110.125	707.007	685.853	-76.3786	747.076	735.949	190.78	678.932	760.88	189.595	703.745	759.919	277.309	696.919	730.788	369.582
157	1.56	439.851	1237.31	40.2816	373.016	1216.43	-13.6904	515.02	1224.27	-0.51446	300.505	1061.97	-107.652	636.796	1043.11	-90.7238	463.842	997.181	1.8171	223.26	782.171	91.3539	354.269	1020.57	160.862	307.073	1047.32	106.607	357.163	1110.4	132.261	430.525	1179.53	119.101	707.027	685.768	-76.335	747.089	735.93	190.769	678.958	760.878	189.612	703.782	759.925	277.304	696.917	730.799	369.595
158	1.57	440.013	1237.36	40.3536	373.246	1216.46	-13.6727	515.215	1224.36	-0.3376	300.524	1062.3	-107.753	636.964	1043.09	-90.8215	464.091	997.355	2.082	222.322	781.331	89.3846	350.595	1019.02	166.765	305.726	1046.5	111.059	354.537	1108.91	139.185	427.981	1178.04	128.762	706.967	685.592	-76.1648	747.094	735.952	190.713	678.972	760.914	189.557	703.803	759.973	277.24	696.893	730.834	369.573
159	1.58	440.278	1237.46	40.5516	373.565	1216.53	-13.695	515.489	1224.46	-0.16169	300.677	1062.48	-107.801	637.157	1043.07	-91.0138	464.36	997.557	2.38845	221.379	780.521	87.1244	346.415	1017.1	173.278	304.352	1045.28	115.561	351.652	1107.3	146.861	424.388	1175.87	139.323	706.895	685.414	-75.9644	747.105	735.963	190.669	678.994	760.969	189.526	703.811	760.003	277.203	696.873	730.896	369.588
160	1.59	440.582	1237.47	40.4971	374.016	1216.64	-13.6131	515.829	1224.53	0.01444	300.876	1062.64	-107.829	637.376	1043.01	-91.129	464.686	997.699	2.66865	220.477	779.88	84.4613	341.66	1014.79	180.161	303.059	1043.67	120.006	348.425	1105.33	155.121	420.025	1173.05	150.932	706.869	685.312	-75.9414	747.112	735.951	190.632	679.021	760.997	189.513	703.834	760.029	277.196	696.853	730.932	369.646
161	1.6	441.027	1237.47	40.4938	374.486	1216.72	-13.4951	516.264	1224.52	0.07995	301.005	1062.84	-107.767	637.643	1042.93	-91.2186	465.039	997.662	2.58631	219.42	778.865	82.0407	336.286	1012.05	187.248	301.327	1042.03	125.289	344.811	1102.95	163.763	416.732	1170.24	163.602	706.905	685.256	-76.035	747.142	735.916	190.647	679.054	760.982	189.517	703.874	760.043	277.191	696.88	730.93	369.657
162	1.61	441.567	1237.45	40.4015	375.231	1216.55	-13.8814	516.776	1224.45	-0.11247	301.009	1063.05	-107.563	637.961	1042.82	-91.237	465.358	997.532	2.28021	218.204	777.68	79.605	330.289	1008.85	194.324	299.345	1040.08	130.793	340.864	1100.07	172.631	413.138	1167.18	177.391	706.969	685.216	-76.1083	747.205	735.881	190.672	679.118	760.949	189.498	703.925	760.021	277.189	696.942	730.886	369.609
163	1.62	442.131	1237.39	40.1242	376.14	1216.2	-14.669	517.042	1224.3	-0.96124	301.284	1063.11	-107.482	638.311	1042.63	-91.1619	465.674	997.433	2.06005	216.945	776.357	76.9649	323.574	1005.28	201.571	297.304	1037.81	136.369	336.611	1096.7	181.689	409.004	1163.52	193.351	707.02	685.112	-76.093	747.266	735.853	190.709	679.157	760.916	189.498	703.945	759.988	277.203	696.98	730.821	369.559
164	1.63	442.67	1237.35	40.0663	376.521	1216.29	-14.6429	517.003	1224.24	-2.33644	301.826	1063.07	-107.515	638.595	1042.39	-91.189	465.962	997.417	1.98429	215.569	774.957	74.2427	316.069	1001.38	208.783	295.323	1035.15	141.818	331.884	1092.81	190.892	404.293	1159.27	211.786	707.089	685.021	-76.1335	747.275	735.851	190.767	679.161	760.897	189.535	703.94	759.966	277.23	696.972	730.809	369.545
165	1.64	443.229	1237.46	40.1329	376.989	1216.33	-14.6844	517.396	1224.21	-2.77262	302.307	1063.19	-107.632	638.877	1042.24	-91.3316	466.226	997.51	2.11742	214.536	773.481	71.7624	307.904	997.13	215.789	293.203	1031.97	147.679	326.839	1088.4	200.153	398.335	1153.7	228.232	707.175	684.942	-76.2626	747.268	735.88	190.764	679.157	760.907	189.571	703.935	759.98	277.247	696.916	730.835	369.581
166	1.65	443.767	1237.49	40.093	377.48	1216.39	-14.7134	517.911	1224.24	-2.89383	302.663	1063.46	-107.721	639.157	1042.15	-91.6242	466.539	997.681	2.32393	214.122	772.041	69.5731	299.137	992.537	222.848	291.143	1028.27	153.417	321.529	1083.42	209.325	391.456	1147.43	244.001	707.254	684.765	-76.2869	747.256	735.915	190.753	679.142	760.915	189.544	703.915	760.011	277.225	696.844	730.875	369.591
167	1.66	444.321	1237.49	39.9684	377.784	1216.61	-14.4925	518.474	1224.27	-2.95842	302.249	1063.99	-107.55	639.432	1042.12	-92.0455	466.898	997.845	2.55159	212.935	770.642	66.3886	289.831	987.585	229.662	289.116	1024.05	159.083	316.139	1077.83	218.489	384.117	1139.96	259.723	707.259	684.495	-76.1574	747.245	735.952	190.716	679.128	760.917	189.483	703.887	760.04	277.195	696.791	730.907	369.594
168	1.67	444.959	1237.55	40.0061	377.925	1217.06	-13.8995	519.04	1224.24	-2.98621	302.429	1064.11	-107.316	639.76	1042	-92.2871	467.273	997.926	2.65269	211.742	769.315	63.1922	280.489	982.119	234.931	287.219	1019.33	164.865	310.605	1071.58	227.456	376.34	1130.8	275.664	707.248	684.192	-75.9379	747.257	735.946	190.679	679.145	760.923	189.465	703.898	760.062	277.177	696.772	730.931	369.591
169	1.68	445.684	1237.61	40.1152	378.512	1217.25	-13.6526	519.659	1224.15	-3.11458	302.654	1064.28	-107.101	640.106	1041.86	-92.4745	467.658	997.927	2.56249	210.187	767.787	59.5287	271.106	976.273	239.484	285.497	1014.02	170.839	305.049	1064.75	236.117	368.111	1120.87	290.995	707.247	683.863	-75.6826	747.294	735.905	190.661	679.196	760.894	189.399	703.948	760.062	277.145	696.794	730.927	369.589
170	1.69	446.465	1237.62	40.1764	379.203	1217.38	-13.4823	520.348	1224.06	-3.31464	302.897	1064.47	-106.932	640.448	1041.74	-92.5898	467.991	997.826	2.29063	208.146	766.268	54.9283	261.718	970.142	243.191	283.484	1008.18	176.739	299.564	1057.27	244.63	359.686	1109.92	305.772	707.272	683.561	-75.495	747.36	735.858	190.64	679.266	760.864	189.345	704.002	760.048	277.124	696.834	730.892	369.561
171	1.7	447.279	1237.57	40.1504	379.839	1217.46	-13.3521	521.067	1223.95	-3.45044	303.103	1064.66	-106.795	640.759	1041.59	-92.6615	468.131	997.631	1.2763	206.522	765.169	50.8616	252.485	963.839	246.432	281.251	1001.8	182.664	294.073	1049.2	252.885	351.077	1097.91	319.925	707.339	683.364	-75.4541	747.403	735.815	190.626	679.326	760.826	189.304	704.038	760.03	277.096	696.835	730.842	369.489
172	1.71	447.992	1237.52	40.1197	380.409	1217.56	-13.2459	521.75	1223.83	-3.44458	303.267	1064.85	-106.66	641.053	1041.42	-92.7074	468.016	997.403	-0.55244	204.936	764.022	47.1647	243.383	957.436	249.061	278.793	995.01	188.568	288.608	1040.41	260.49	342.346	1084.72	333.727	707.478	683.315	-75.5925	747.428	735.789	190.635	679.36	760.81	189.297	704.041	760.007	277.089	696.805	730.822	369.477
173	1.72	448.686	1237.5	40.2225	380.977	1217.61	-13.0442	522.347	1223.75	-3.33693	303.388	1065.04	-106.531	641.324	1041.26	-92.6773	468.137	997.312	-0.99598	203.417	762.844	43.6361	234.358	951.018	251.425	276.028	987.799	194.323	283.317	1030.92	267.393	333.463	1070.62	346.813	707.674	683.331	-75.866	747.439	735.78	190.647	679.388	760.815	189.265	704.03	760.006	277.087	696.75	730.83	369.487
174	1.73	449.368	1237.43	40.3837	381.54	1217.65	-12.8102	522.924	1223.68	-3.17914	303.501	1065.25	-106.416	641.568	1041.12	-92.6583	468.278	997.304	-1.0099	201.967	761.716	39.9727	226.011	944.594	253.064	273.462	979.855	200.59	278.256	1021.19	274.874	324.678	1056.12	357.927	707.818	683.241	-75.9291	747.443	735.812	190.669	679.389	760.806	189.219	704.012	760.034	277.076	696.678	730.875	369.534
175	1.74	450.015	1237.39	40.7004	382.06	1217.68	-12.5198	523.477	1223.6	-3.03292	303.631	1065.46	-106.267	641.799	1041.01	-92.6303	468.44	997.328	-0.86669	200.534	760.303	36.402	218.485	938.168	253.224	271.663	970.806	207.964	273.112	1011.12	281.597	315.456	1040.79	368.034	707.961	683.106	-75.9118	747.45	735.841	190.699	679.401	760.821	189.193	703.993	760.07	277.071	696.64	730.911	369.547
176	1.75	450.593	1237.31	41.0271	382.551	1217.7	-12.1424	523.989	1223.49	-2.91073	303.752	1065.64	-106.003	642.037	1040.88	-92.5741	468.648	997.377	-0.55198	199.06	758.744	32.7725	211.311	931.914	253.151	269.378	961.863	213.807	267.83	1000.72	287.79	305.431	1025.07	377.54	708.098	682.915	-75.7738	747.48	735.872	190.722	679.438	760.842	189.169	703.996	760.106	277.095	696.643	730.956	369.543
177	1.76	451.125	1237.13	41.2979	382.997	1217.72	-11.7799	524.471	1223.32	-2.73826	303.853	1065.79	-105.618	642.26	1040.78	-92.5272	468.89	997.348	-0.23222	197.627	757.13	28.8464	204.618	925.775	252.483	266.914	952.968	218.481	262.6	989.997	293.515	295.549	1009.02	386.311	708.271	682.778	-75.7604	747.516	735.872	190.747	679.485	760.851	189.17	704.029	760.115	277.112	696.663	730.962	369.546
178	1.77	451.715	1236.97	41.7164	383.406	1217.67	-11.4475	524.957	1223.11	-2.5263	303.889	1065.95	-105.132	642.49	1040.67	-92.4852	469.137	997.22	-0.10082	196.188	755.424	24.7283	198.464	919.676	251.253	263.754	944.296	221.416	257.699	978.908	297.989	286.091	992.86	393.178	708.367	682.607	-75.6641	747.573	735.842	190.771	679.56	760.846	189.172	704.069	760.113	277.098	696.727	730.92	369.488
179	1.78	452.294	1236.8	42.0534	383.813	1217.61	-11.0461	525.433	1222.87	-2.2899	303.822	1066.15	-104.492	642.665	1040.58	-92.4544	469.374	997.094	0.06383	194.811	753.494	20.6034	192.88	913.444	249.777	259.872	936.188	222.225	252.861	967.646	301.586	276.829	976.615	398.95	708.417	682.434	-75.5459	747.637	735.788	190.774	679.648	760.819	189.125	704.123	760.085	277.074	696.824	730.853	369.399
180	1.79	452.748	1236.64	42.4292	384.18	1217.56	-10.539	525.851	1222.68	-1.96964	303.69	1066.35	-103.811	642.771	1040.5	-92.3544	469.545	996.987	0.27942	193.306	751.802	15.4235	187.94	906.849	248.184	257.478	926.81	225.234	247.938	956.531	304.52	267.592	961.438	402.978	708.519	682.34	-75.5529	747.682	735.743	190.776	679.71	760.798	189.077	704.174	760.076	277.054	696.921	730.806	369.36
181	1.8	453.051	1236.45	42.7204	384.489	1217.5	-9.95704	526.159	1222.51	-1.60895	303.529	1066.54	-103.248	642.809	1040.42	-92.1865	469.573	996.841	0.39114	191.728	750.406	9.41988	183.429	899.796	246.459	254.671	917.281	227.749	242.984	945.763	306.887	258.769	947.103	405.833	708.59	682.262	-75.5142	747.688	735.724	190.762	679.726	760.784	189.042	704.176	760.062	277.042	696.979	730.779	369.345
182	1.81	453.269	1236.26	43.0673	384.676	1217.45	-9.43344	526.355	1222.36	-1.22144	303.32	1066.73	-102.745	642.779	1040.36	-91.977	469.471	996.668	0.46957	190.867	748.422	5.02028	179.193	892.304	244.778	251.548	908.071	229.119	238.235	935.339	308.55	250.619	933.591	407.789	708.656	682.243	-75.5217	747.661	735.739	190.751	679.69	760.774	189.034	704.135	760.049	277.022	696.957	730.795	369.338
183	1.82	453.427	1236.04	43.4601	384.748	1217.4	-9.01713	526.455	1222.22	-0.79409	303.078	1066.94	-102.136	642.716	1040.32	-91.7145	469.318	996.548	0.60436	190.285	746.372	0.5086	175.254	884.514	242.941	248.196	899.167	229.792	233.789	924.93	309.354	243.271	920.795	409.068	708.771	682.248	-75.5612	747.629	735.778	190.742	679.64	760.783	189.007	704.076	760.071	276.993	696.905	730.852	369.371
184	1.83	453.563	1235.83	44.0901	384.762	1217.36	-8.57961	526.512	1222.06	-0.35943	302.831	1067.13	-101.497	642.63	1040.31	-91.3513	469.132	996.493	0.89334	189.993	744.438	-4.19604	171.649	876.579	241.064	244.915	890.578	230.095	229.426	914.893	309.681	236.651	908.578	409.757	708.914	682.324	-75.6661	747.582	735.819	190.748	679.583	760.812	189.062	704.018	760.126	277.049	696.855	730.922	369.425
185	1.84	453.702	1235.68	44.8103	384.764	1217.31	-8.02843	526.534	1221.86	0.05937	302.599	1067.23	-100.937	642.541	1040.32	-90.9521	468.967	996.43	1.24902	190.096	742.488	-9.10906	168.424	868.672	239.055	241.908	882.246	229.859	225.291	905.211	309.617	230.784	896.647	409.667	709.033	682.374	-75.683	747.541	735.836	190.798	679.548	760.849	189.114	703.985	760.18	277.104	696.82	730.971	369.469
186	1.85	453.781	1235.39	45.288	384.789	1217.24	-7.48843	526.577	1221.61	0.4535	302.362	1067.26	-100.496	642.479	1040.34	-90.599	468.83	996.308	1.42185	190.7	740.574	-14.0118	165.684	861.164	236.216	240.205	874.101	231.961	221.425	895.478	309.018	225.509	884.939	409.164	709.163	682.432	-75.7342	747.541	735.841	190.841	679.548	760.852	189.09	703.99	760.191	277.108	696.827	730.966	369.461
187	1.86	453.797	1235.08	45.6192	384.772	1217.12	-7.04359	526.593	1221.32	0.87095	302.107	1067.17	-100.086	642.417	1040.36	-90.2853	468.686	996.11	1.44573	191.624	738.507	-18.5566	163.381	854.161	232.576	239.958	866.035	237.084	217.71	885.532	307.95	220.644	873.449	408.24	709.247	682.437	-75.6887	747.561	735.826	190.841	679.565	760.808	189.047	704.012	760.15	277.086	696.877	730.894	369.401
188	1.87	453.753	1234.79	46.039	384.709	1217	-6.57837	526.541	1221.03	1.25026	301.764	1066.99	-99.58	642.3	1040.41	-89.9676	468.523	995.933	1.55337	192.753	736.363	-22.9861	161.216	846.994	230.084	236.853	858.026	234.193	214.501	876.598	306.336	216.154	862.301	406.887	709.248	682.428	-75.5854	747.567	735.786	190.827	679.563	760.753	189.051	704.014	760.1	277.091	696.92	730.824	369.372
189	1.88	453.653	1234.55	46.4804	384.596	1216.9	-6.11022	526.401	1220.77	1.59862	301.319	1066.73	-98.9949	642.147	1040.49	-89.6134	468.299	995.778	1.72689	194.051	734.291	-27.4776	159.366	840.049	227.806	232.556	850.694	226.305	211.561	868.247	304.171	211.983	851.66	405.232	709.202	682.458	-75.5242	747.558	735.763	190.812	679.531	760.71	189.056	703.994	760.065	277.088	696.933	730.785	369.397
190	1.89	453.469	1234.33	46.9024	384.42	1216.82	-5.71174	526.204	1220.57	1.95193	300.784	1066.41	-98.4954	641.96	1040.58	-89.3512	468.013	995.649	1.90349	195.454	732.234	-31.9025	157.727	833.54	225.274	231.569	844.067	223.339	209.124	860.064	302.49	208.107	841.765	403.327	709.136	682.504	-75.4879	747.539	735.768	190.788	679.493	760.701	189.073	703.964	760.031	277.066	696.904	730.784	369.402
191	1.9	453.175	1234.13	47.1742	384.144	1216.74	-5.42938	525.922	1220.43	2.31467	300.193	1066.04	-98.0921	641.725	1040.68	-89.1281	467.695	995.527	2.03416	196.81	730.097	-36.0482	156.323	827.511	222.299	230.479	837.517	221.185	206.826	852.333	300.817	204.662	832.531	401.096	709.038	682.534	-75.3428	747.488	735.799	190.778	679.435	760.708	189.106	703.91	760.028	277.056	696.858	730.813	369.428
192	1.91	452.862	1233.97	47.4994	383.819	1216.65	-5.14166	525.596	1220.32	2.62338	299.544	1065.61	-97.6844	641.426	1040.81	-88.8209	467.321	995.401	2.24534	198.171	728.035	-39.9062	155.258	821.462	219.361	229.514	831.248	219.083	204.957	845.002	298.912	201.825	823.984	398.732	708.955	682.7	-75.3819	747.432	735.824	190.798	679.371	760.72	189.17	703.847	760.055	277.085	696.79	730.854	369.489
193	1.92	452.593	1233.83	47.9431	383.516	1216.57	-4.75994	525.266	1220.21	2.89817	298.922	1065.16	-97.1895	641.125	1040.97	-88.4417	466.936	995.224	2.37504	199.621	726.106	-43.6725	154.44	815.492	216.691	228.658	825.424	217.16	203.405	838.094	296.862	199.619	816.149	396.515	708.928	682.959	-75.5315	747.4	735.848	190.848	679.319	760.763	189.228	703.817	760.1	277.164	696.745	730.9	369.56
194	1.93	452.296	1233.59	48.2372	383.161	1216.41	-4.3984	524.913	1220.09	3.14541	298.34	1064.66	-96.7034	640.856	1041.13	-88.0771	466.537	994.967	2.32694	201.221	724.298	-47.3476	153.874	809.605	214.104	228.01	820.005	215.319	202.198	831.672	294.797	198.103	808.906	394.377	708.918	683.239	-75.6656	747.38	735.871	190.872	679.294	760.79	189.261	703.819	760.107	277.195	696.742	730.912	369.574
195	1.94	451.977	1233.33	48.4699	382.736	1216.2	-4.12362	524.535	1219.93	3.3833	297.73	1064.09	-96.3815	640.586	1041.29	-87.7454	466.125	994.724	2.18787	203.407	721.464	-49.1412	153.462	803.661	212.296	228.056	814.734	214.388	201.423	825.481	292.883	197.031	802.303	392.221	708.919	683.525	-75.8109	747.37	735.875	190.907	679.28	760.796	189.246	703.805	760.079	277.199	696.743	730.888	369.549
196	1.95	451.603	1233.16	48.7478	382.28	1215.98	-3.87322	524.105	1219.74	3.59353	297.117	1063.49	-96.2106	640.29	1041.44	-87.464	465.725	994.557	2.09814	205.772	718.433	-50.4291	153.27	797.901	210.724	228.438	809.663	213.857	200.99	819.634	290.959	196.4	796.288	390.265	708.903	683.738	-75.8714	747.349	735.852	190.907	679.25	760.792	189.283	703.788	760.054	277.22	696.733	730.859	369.517
197	1.96	451.128	1232.92	48.9829	381.828	1215.8	-3.65632	523.634	1219.58	3.73982	296.532	1062.89	-96.1284	639.984	1041.58	-87.2277	465.308	994.432	2.0279	206.395	718.566	-55.604	153.386	793.234	207.687	227.581	805.131	210.338	200.476	814.692	288.921	196.247	790.754	388.355	708.896	683.911	-75.8865	747.318	735.847	190.908	679.207	760.788	189.336	703.766	760.037	277.248	696.692	730.84	369.56
198	1.97	450.587	1232.69	49.1998	381.309	1215.61	-3.53388	523.125	1219.43	3.83532	295.908	1062.27	-96.02	639.654	1041.71	-87.0868	464.86	994.373	1.94974	207.694	717.401	-58.841	153.688	788.567	205.353	227.528	800.782	208.389	200.405	809.835	287.179	196.459	785.73	386.603	708.846	683.992	-75.7213	747.278	735.861	190.888	679.169	760.783	189.356	703.717	760.003	277.236	696.628	730.836	369.599
199	1.98	450.033	1232.45	49.439	380.698	1215.43	-3.51718	522.564	1219.28	3.89157	295.259	1061.7	-95.9831	639.261	1041.89	-87.0266	464.387	994.353	1.93746	209.012	716.02	-61.4025	154.082	784.271	203.516	227.822	796.627	206.744	200.599	805.245	285.532	196.966	781.011	385.01	708.734	684.074	-75.5258	747.222	735.884	190.846	679.101	760.79	189.38	703.65	759.991	277.222	696.528	730.859	369.628
200	1.99	449.366	1232.17	49.486	380.096	1215.22	-3.38653	521.982	1219.15	4.00304	294.598	1061.13	-95.94	638.851	1042.12	-86.9664	463.922	994.332	1.95301	210.197	714.676	-63.5894	154.57	780.296	201.954	228.273	792.723	205.266	200.951	800.924	283.969	197.729	776.449	383.496	708.655	684.264	-75.4774	747.163	735.92	190.815	679.034	760.823	189.4	703.581	759.992	277.226	696.412	730.882	369.654
201	2	448.682	1231.94	49.4232	379.522	1214.98	-3.22719	521.382	1219.03	4.15602	293.927	1060.53	-95.8459	638.454	1042.36	-86.9339	463.501	994.259	1.91949	211.279	713.424	-65.5442	155.161	776.646	200.526	228.798	789.098	204.029	201.453	796.861	282.578	198.691	772.065	382.255	708.643	684.581	-75.5744	747.113	735.939	190.836	678.989	760.846	189.418	703.538	759.997	277.261	696.317	730.899	369.681
202	2.01	448.109	1231.74	49.4895	378.938	1214.77	-3.17113	520.786	1218.91	4.2437	293.296	1059.94	-95.7275	638.048	1042.59	-86.9267	463.117	994.112	1.82127	212.214	712.286	-67.2448	155.748	773.306	199.35	229.377	785.761	202.949	202.079	793.026	281.496	199.591	767.834	381.127	708.628	684.941	-75.7014	747.088	735.935	190.846	678.979	760.862	189.453	703.513	759.99	277.288	696.218	730.923	369.765
203	2.02	447.576	1231.54	49.6281	378.366	1214.56	-3.19296	520.229	1218.77	4.23744	292.671	1059.35	-95.5489	637.651	1042.8	-86.8954	462.772	993.935	1.67437	213.016	711.226	-68.636	156.34	770.232	198.206	229.994	782.734	202.035	202.721	789.438	280.603	200.415	763.852	380.118	708.62	685.331	-75.8561	747.101	735.944	190.895	679	760.911	189.521	703.5	759.967	277.314	696.152	730.919	369.787
204	2.03	446.974	1231.29	49.4062	377.798	1214.35	-3.28434	519.666	1218.67	4.10592	292.023	1058.77	-95.2732	637.295	1042.99	-86.8945	462.448	993.808	1.57641	213.779	710.184	-69.9153	156.994	767.34	197.3	230.628	779.979	201.169	203.333	786.123	279.915	201.131	760.084	379.227	708.647	685.708	-76.0367	747.118	735.933	190.943	679.021	760.947	189.571	703.521	759.95	277.311	696.165	730.897	369.78
205	2.04	446.394	1231.09	49.3366	377.216	1214.14	-3.351	519.091	1218.63	4.00752	291.394	1058.23	-94.994	636.981	1043.17	-86.9112	462.104	993.709	1.51232	214.457	709.182	-70.9814	157.618	764.589	196.592	231.186	777.444	200.538	203.889	783.033	279.416	201.779	756.464	378.501	708.66	686.015	-76.1582	747.128	735.923	191.002	679.047	760.97	189.605	703.556	759.955	277.328	696.203	730.896	369.807
206	2.05	445.827	1230.95	49.3075	376.63	1213.94	-3.38262	518.493	1218.62	3.93967	290.786	1057.69	-94.6794	636.662	1043.35	-87.0351	461.75	993.658	1.40515	215.009	708.166	-71.7184	158.149	761.914	196.022	231.65	775.049	200.142	204.322	780.041	278.883	202.375	752.966	377.873	708.683	686.282	-76.2594	747.141	735.934	190.986	679.056	760.997	189.616	703.563	759.948	277.326	696.237	730.884	369.772
207	2.06	445.274	1230.89	49.2576	376.046	1213.81	-3.50783	517.926	1218.66	3.84278	290.164	1057.16	-94.3301	636.312	1043.53	-87.2432	461.423	993.68	1.29625	215.552	707.203	-72.4249	158.627	759.322	195.601	232.059	772.722	199.786	204.65	777.129	278.511	202.759	749.575	377.34	708.711	686.512	-76.3393	747.14	735.971	190.911	679.051	761.022	189.607	703.554	759.959	277.281	696.25	730.895	369.709
208	2.07	444.72	1230.88	49.3167	375.46	1213.69	-3.69395	517.39	1218.71	3.79093	289.608	1056.67	-93.959	635.936	1043.72	-87.4933	461.111	993.71	1.1494	216.07	706.347	-73.0012	159.038	756.797	195.122	232.394	770.322	199.547	204.965	774.246	278.301	203.016	746.205	376.984	708.698	686.689	-76.3531	747.124	735.999	190.894	679.02	761.044	189.573	703.543	759.979	277.252	696.241	730.909	369.681
209	2.08	444.172	1230.81	49.2375	374.939	1213.56	-3.78819	516.883	1218.74	3.68004	289.085	1056.22	-93.5375	635.575	1043.88	-87.7092	460.875	993.745	1.06979	216.565	705.619	-73.6467	159.417	754.291	194.867	232.79	767.866	199.392	205.273	771.273	278.015	203.232	742.794	376.577	708.607	686.818	-76.2751	747.103	736.011	190.907	679.015	761.061	189.598	703.534	759.991	277.249	696.247	730.908	369.677
210	2.09	443.721	1230.76	49.1747	374.499	1213.45	-3.80536	516.406	1218.77	3.39322	288.555	1055.77	-93.0715	635.231	1044.04	-87.9322	460.701	993.75	0.96839	216.92	705.034	-74.2758	159.812	751.907	194.652	233.244	765.443	199.32	205.659	768.258	277.992	203.512	739.263	376.155	708.514	687.004	-76.2757	747.098	735.999	190.873	679.048	761.091	189.608	703.571	759.997	277.25	696.286	730.907	369.683
211	2.1	443.315	1230.65	48.8771	374.141	1213.35	-3.85117	515.996	1218.8	3.1116	288.004	1055.29	-92.5199	634.936	1044.15	-88.1569	460.555	993.714	0.71977	217.109	704.512	-74.7622	160.219	749.743	194.421	233.713	762.974	199.268	206.163	765.219	277.872	203.876	735.695	375.801	708.423	687.204	-76.2787	747.151	735.962	190.838	679.101	761.116	189.574	703.651	759.985	277.246	696.374	730.905	369.665
212	2.11	442.985	1230.54	48.5326	373.813	1213.21	-3.93878	515.636	1218.85	2.86849	287.458	1054.83	-91.8945	634.666	1044.25	-88.3636	460.441	993.669	0.5206	217.189	704.007	-75.3811	160.631	747.772	194.302	234.245	760.594	199.079	206.77	762.138	277.665	204.401	732.828	375.413	708.32	687.467	-76.4192	747.207	735.931	190.798	679.152	761.117	189.553	703.73	759.96	277.235	696.48	730.861	369.583
213	2.12	442.713	1230.55	48.4395	373.474	1213.09	-4.00364	515.292	1218.92	2.65144	286.921	1054.34	-91.2697	634.385	1044.33	-88.5099	460.345	993.66	0.46988	217.14	703.471	-76.0286	160.97	746.113	194.079	234.747	758.337	198.803	207.383	759.57	277.351	204.88	731.948	374.841	708.209	687.787	-76.6787	747.222	735.917	190.805	679.165	761.094	189.569	703.775	759.953	277.212	696.532	730.828	369.569
214	2.13	442.427	1230.53	48.4023	373.133	1213.01	-3.98811	514.971	1219	2.55615	286.353	1053.82	-90.6357	634.112	1044.4	-88.6718	460.196	993.679	0.5224	216.94	702.944	-76.5357	161.217	744.818	193.745	235.113	756.529	198.349	207.716	758.407	276.955	205.122	731.758	374.461	708.048	687.952	-76.781	747.207	735.901	190.824	679.151	761.081	189.604	703.793	759.947	277.208	696.533	730.829	369.576
215	2.14	442.183	1230.58	48.4383	372.749	1212.96	-3.95634	514.662	1219.1	2.52933	285.768	1053.38	-89.9909	633.828	1044.48	-88.8573	460.008	993.709	0.53735	216.676	702.488	-76.8954	161.356	744.128	193.426	235.396	755.95	198.128	207.706	758.322	276.572	205.302	731.784	374.211	707.841	688.015	-76.7844	747.168	735.907	190.795	679.097	761.09	189.613	703.781	759.951	277.161	696.518	730.85	369.535
216	2.15	441.948	1230.61	48.5055	372.395	1212.93	-3.89883	514.388	1219.2	2.51742	285.199	1053.06	-89.392	633.543	1044.55	-89.0375	459.768	993.784	0.62174	216.48	702.18	-77.1088	161.379	743.926	193.124	235.448	756.026	197.919	207.618	758.525	276.277	205.486	731.847	374.071	707.574	688.008	-76.7074	747.118	735.963	190.732	679.03	761.112	189.574	703.751	759.981	277.127	696.514	730.881	369.525
217	2.16	441.74	1230.6	48.5137	372.236	1212.92	-3.79554	514.142	1219.24	2.50632	284.754	1052.86	-88.8876	633.278	1044.61	-89.1296	459.507	993.899	0.87499	216.413	701.991	-77.1379	161.417	743.798	192.981	235.489	756.193	197.873	207.662	758.493	276.208	205.583	731.876	374.024	707.3	687.975	-76.5951	747.077	735.99	190.648	678.989	761.136	189.539	703.749	760.01	277.112	696.536	730.918	369.519
218	2.17	441.625	1230.6	48.7673	372.267	1212.88	-3.73899	513.932	1219.18	2.43931	284.449	1052.77	-88.5598	633.024	1044.64	-89.178	459.265	993.976	1.0849	216.399	701.989	-77.0831	161.54	743.547	193.03	235.622	756.005	197.962	207.817	758.169	276.294	205.655	731.86	374.085	707.015	687.93	-76.4855	747.035	735.961	190.601	678.98	761.133	189.538	703.766	760.009	277.132	696.583	730.913	369.548
219	2.18	441.498	1230.51	48.8374	372.152	1212.82	-3.61827	513.76	1219.07	2.30809	284.262	1052.8	-88.422	632.805	1044.63	-89.2704	459.083	993.981	1.17456	216.323	702.28	-77.1116	161.52	743.368	193.361	235.831	755.539	198.061	208.033	757.724	276.421	205.764	731.851	374.182	706.72	687.865	-76.3464	747.015	735.917	190.586	678.961	761.086	189.561	703.79	759.998	277.132	696.645	730.879	369.502
220	2.19	441.39	1230.36	48.8581	372.044	1212.73	-3.52562	513.598	1218.96	2.17216	284.139	1052.93	-88.4	632.641	1044.59	-89.3795	458.955	993.94	1.1644	216.121	702.858	-77.2397	161.26	743.351	193.918	236.038	755.065	198.146	208.272	757.272	276.578	205.902	731.825	374.281	706.509	687.86	-76.3724	747.004	735.875	190.535	678.937	761.055	189.551	703.811	759.963	277.108	696.707	730.827	369.462
221	2.2	441.262	1230.19	48.8707	371.801	1212.65	-3.37183	513.425	1218.9	2.14389	284.043	1053.15	-88.4111	632.517	1044.53	-89.3889	458.841	993.939	1.17291	215.761	703.575	-77.3273	161.317	743.006	194.21	236.214	754.685	198.295	208.497	756.87	276.78	206.09	731.794	374.448	706.305	687.852	-76.4775	746.968	735.838	190.541	678.913	761.032	189.583	703.816	759.922	277.118	696.724	730.777	369.462
222	2.21	441.146	1230.1	48.9041	371.396	1212.65	-3.17627	513.273	1218.9	2.16044	283.926	1053.47	-88.4774	632.407	1044.46	-89.3477	458.718	993.965	1.13853	215.192	704.318	-77.3816	161.541	742.498	194.289	236.331	754.385	198.467	208.644	756.536	276.936	206.236	731.771	374.567	706.083	687.777	-76.4836	746.905	735.831	190.563	678.853	760.999	189.617	703.788	759.898	277.126	696.702	730.76	369.497
223	2.22	441.008	1230.03	48.8393	371.167	1212.66	-3.18229	513.136	1218.95	2.15125	283.831	1053.83	-88.5244	632.296	1044.38	-89.3416	458.594	994.036	1.10211	214.488	705.039	-77.5253	161.915	741.825	194.035	236.348	754.122	198.557	208.706	756.271	277.013	206.326	731.753	374.641	705.924	687.791	-76.6641	746.844	735.87	190.556	678.761	760.972	189.612	703.732	759.905	277.123	696.659	730.772	369.498
224	2.23	440.862	1229.96	48.7499	371.053	1212.66	-3.20834	513.035	1219.03	2.17969	283.773	1054.21	-88.595	632.209	1044.3	-89.3545	458.492	994.153	1.10138	213.82	705.68	-77.7219	161.944	741.392	193.98	236.307	753.878	198.608	208.716	756.043	277.036	206.395	731.76	374.722	705.789	687.78	-76.8118	746.788	735.917	190.549	678.681	760.955	189.608	703.69	759.93	277.148	696.614	730.807	369.536
225	2.24	440.834	1229.96	48.8314	371.005	1212.71	-3.24358	512.999	1219.09	2.15232	283.754	1054.58	-88.6145	632.139	1044.2	-89.3624	458.419	994.313	1.17696	213.13	706.258	-77.8579	161.9	741.064	194.005	236.272	753.698	198.715	208.703	755.881	277.088	206.429	731.784	374.801	705.631	687.698	-76.8728	746.74	735.929	190.518	678.63	760.952	189.619	703.663	759.967	277.195	696.584	730.851	369.605
226	2.25	440.865	1229.97	48.7949	371.06	1212.79	-3.25573	513.053	1219.12	2.12912	283.811	1054.94	-88.5527	632.102	1044.09	-89.371	458.391	994.438	1.2213	212.48	706.776	-77.8245	161.837	740.807	194.03	236.227	753.545	198.777	208.701	755.737	277.126	206.457	731.805	374.875	705.451	687.545	-76.7864	746.716	735.928	190.522	678.617	760.962	189.646	703.669	759.984	277.223	696.594	730.882	369.684
227	2.26	440.99	1230.06	48.7548	371.158	1212.86	-3.40098	513.175	1219.1	2.0359	283.92	1055.28	-88.482	632.106	1043.98	-89.4177	458.411	994.515	1.11511	211.972	707.284	-77.8373	161.597	740.786	194.2	236.211	753.384	198.762	208.722	755.586	277.078	206.471	731.831	374.882	705.34	687.407	-76.7489	746.728	735.904	190.52	678.63	760.979	189.63	703.7	759.973	277.197	696.623	730.869	369.634
228	2.27	441.177	1230.08	48.5287	371.415	1212.92	-3.63648	513.347	1219.04	1.87234	284.053	1055.62	-88.4182	632.147	1043.86	-89.5349	458.419	994.538	0.86163	211.502	707.836	-77.9805	161.178	740.987	194.611	236.279	753.17	198.74	208.815	755.427	277.032	206.475	731.842	374.839	705.212	687.23	-76.6456	746.742	735.867	190.487	678.644	760.97	189.62	703.726	759.961	277.174	696.646	730.826	369.556
229	2.28	441.37	1230.07	48.32	371.848	1212.94	-3.91036	513.54	1218.95	1.66044	284.189	1055.92	-88.3463	632.213	1043.73	-89.635	458.475	994.54	0.69266	211.033	708.395	-78.2313	161.091	740.933	194.732	236.348	752.968	198.671	208.923	755.247	276.976	206.486	731.838	374.814	705.067	687.022	-76.4857	746.71	735.815	190.491	678.64	760.937	189.644	703.739	759.953	277.188	696.662	730.787	369.583
230	2.29	441.585	1230.07	48.122	372.106	1212.98	-4.11937	513.775	1218.89	1.4655	284.339	1056.16	-88.3023	632.284	1043.57	-89.756	458.556	994.58	0.57502	210.59	708.841	-78.4606	161.051	740.828	194.717	236.386	752.775	198.552	209.026	755.065	276.907	206.507	731.844	374.794	704.992	686.813	-76.38	746.686	735.779	190.481	678.625	760.88	189.629	703.733	759.925	277.201	696.68	730.753	369.588
231	2.3	441.866	1230.08	47.8847	372.34	1213.06	-4.38228	514.037	1218.86	1.19908	284.489	1056.35	-88.3031	632.388	1043.41	-90.0063	458.633	994.628	0.37239	210.149	709.23	-78.6743	161.019	740.717	194.611	236.378	752.615	198.375	209.088	754.919	276.79	206.486	731.844	374.668	704.93	686.574	-76.2062	746.691	735.776	190.405	678.602	760.822	189.587	703.732	759.903	277.144	696.682	730.741	369.538
232	2.31	442.157	1230.09	47.6018	372.476	1213.18	-4.68455	514.315	1218.9	0.90194	284.611	1056.5	-88.2856	632.498	1043.29	-90.3423	458.745	994.719	0.18573	209.706	709.594	-78.8826	160.974	740.636	194.515	236.35	752.511	198.258	209.112	754.83	276.689	206.459	731.863	374.578	704.852	686.411	-76.1021	746.688	735.81	190.364	678.575	760.82	189.545	703.716	759.901	277.079	696.654	730.756	369.517
233	2.32	442.426	1230.16	47.3255	372.484	1213.32	-4.81891	514.547	1218.97	0.66447	284.705	1056.59	-88.2278	632.618	1043.18	-90.619	458.876	994.834	0.16708	209.305	709.897	-78.9849	161.102	740.423	194.288	236.267	752.363	198.201	209.065	754.986	276.524	206.403	731.874	374.574	704.816	686.356	-76.1945	746.679	735.852	190.367	678.561	760.838	189.553	703.72	759.936	277.099	696.606	730.804	369.577
234	2.33	442.736	1230.27	47.0563	372.849	1213.44	-5.08431	514.809	1219.02	0.35533	284.8	1056.66	-88.1416	632.731	1043.07	-90.9009	459.033	994.928	0.03569	209.026	710.111	-79.003	161.299	740.182	194.038	236.181	752.185	198.124	208.988	755.19	276.326	206.363	731.874	374.563	704.849	686.356	-76.3798	746.677	735.859	190.392	678.583	760.859	189.563	703.758	759.987	277.146	696.567	730.854	369.646
235	2.34	443.109	1230.3	46.5795	373.411	1213.53	-5.50797	515.143	1219.04	-0.14796	284.893	1056.72	-88.1535	632.871	1042.96	-91.2531	459.244	994.993	-0.26411	208.856	710.265	-79.0012	160.982	740.395	194.341	236.282	752.247	198.219	209.137	754.78	276.635	206.364	731.859	374.543	704.832	686.313	-76.4806	746.711	735.841	190.386	678.634	760.89	189.551	703.818	760.023	277.143	696.572	730.876	369.668
236	2.35	443.534	1230.34	46.0414	373.819	1213.63	-5.86257	515.52	1219.06	-0.68927	285.017	1056.71	-88.2086	633.036	1042.85	-91.636	459.545	995.051	-0.69138	208.775	710.357	-78.9931	161.116	740.294	194.22	236.325	752.145	198.208	209.158	754.836	276.538	206.382	731.836	374.551	704.782	686.209	-76.4468	746.783	735.805	190.371	678.704	760.912	189.527	703.886	760.029	277.132	696.621	730.846	369.622
237	2.36	443.993	1230.45	45.6305	374.076	1213.77	-6.13117	515.917	1219.07	-1.16794	285.152	1056.65	-88.2555	633.215	1042.73	-92.0232	459.871	995.158	-0.92368	208.741	710.358	-78.9261	161.557	739.989	193.801	236.381	752.02	198.195	209.095	755.21	276.203	206.411	731.824	374.596	704.771	686.097	-76.3775	746.846	735.755	190.404	678.775	760.921	189.553	703.95	760.019	277.133	696.68	730.79	369.592
238	2.37	444.489	1230.62	45.1593	374.182	1213.96	-6.35795	516.302	1219.11	-1.71593	285.261	1056.57	-88.3527	633.379	1042.63	-92.4594	460.129	995.302	-1.12754	208.717	710.322	-78.8795	161.709	739.941	193.738	236.569	752.132	198.312	209.126	755.253	276.167	206.436	731.812	374.619	704.704	685.865	-76.1492	746.868	735.726	190.381	678.81	760.901	189.557	703.988	760.005	277.142	696.733	730.739	369.539
239	2.38	444.935	1230.75	44.5887	374.552	1214.12	-6.87017	516.67	1219.2	-2.31397	285.327	1056.5	-88.5242	633.507	1042.55	-92.9428	460.289	995.433	-1.46534	208.697	710.258	-78.8878	161.77	739.928	193.683	236.651	752.167	198.326	209.148	755.234	276.148	206.438	731.81	374.586	704.632	685.625	-75.8986	746.882	735.736	190.307	678.797	760.86	189.502	703.986	759.986	277.112	696.762	730.734	369.501
240	2.39	445.278	1230.97	44.0721	375.067	1214.27	-7.44665	516.965	1219.33	-2.95499	285.356	1056.43	-88.6835	633.584	1042.49	-93.4014	460.438	995.616	-1.70283	208.71	710.166	-78.895	161.8	739.908	193.626	236.665	752.183	198.309	209.157	755.223	276.109	206.416	731.818	374.559	704.61	685.491	-75.7987	746.86	735.749	190.267	678.77	760.833	189.442	703.962	759.97	277.058	696.749	730.753	369.505
241	2.4	445.566	1231.24	43.7199	375.347	1214.49	-7.90146	517.197	1219.47	-3.57589	285.378	1056.35	-88.7902	633.633	1042.48	-93.8072	460.557	995.85	-1.77749	208.745	710.104	-78.9452	161.657	740.047	193.787	236.67	752.212	198.324	209.245	755	276.348	206.408	731.842	374.558	704.587	685.433	-75.6953	746.814	735.784	190.302	678.751	760.842	189.468	703.942	760.008	277.05	696.726	730.799	369.557
242	2.41	445.823	1231.51	43.1815	375.563	1214.66	-8.29554	517.367	1219.62	-4.21314	285.417	1056.28	-88.8909	633.688	1042.49	-94.1866	460.708	996.064	-1.91548	208.806	710.048	-79.0524	161.289	740.389	194.225	236.716	752.222	198.318	209.451	754.48	276.84	206.417	731.856	374.535	704.597	685.508	-75.7524	746.817	735.811	190.304	678.775	760.883	189.515	703.973	760.067	277.067	696.715	730.834	369.6
243	2.42	446.113	1231.7	42.4828	375.631	1214.8	-8.73821	517.516	1219.78	-4.88582	285.476	1056.17	-89.0047	633.768	1042.52	-94.5864	460.899	996.159	-2.40478	208.89	709.984	-79.169	161.415	740.324	194.107	236.801	752.209	198.295	209.479	754.572	276.74	206.462	731.862	374.529	704.696	685.739	-75.9804	746.905	735.817	190.299	678.87	760.943	189.558	704.056	760.098	277.064	696.766	730.824	369.588
244	2.43	446.374	1231.87	41.6353	375.515	1214.98	-9.13398	517.677	1219.94	-5.62369	285.517	1056.03	-89.1717	633.862	1042.57	-95.025	461.136	996.191	-2.99148	209.022	709.866	-79.2165	161.693	740.14	193.854	236.891	752.172	198.233	209.45	754.791	276.48	206.511	731.87	374.498	704.801	685.976	-76.1836	747.026	735.795	190.321	679.02	761.016	189.587	704.169	760.117	277.055	696.848	730.8	369.536
245	2.44	446.538	1232.13	40.9173	375.543	1215.12	-9.55982	517.789	1220.12	-6.44456	285.529	1055.88	-89.3247	633.903	1042.66	-95.4321	461.355	996.276	-3.50117	209.153	709.711	-79.2046	161.462	740.36	194.22	236.95	752.171	198.266	209.609	754.382	276.829	206.532	731.868	374.505	704.921	686.266	-76.3709	747.12	735.772	190.409	679.165	761.144	189.62	704.281	760.171	277.07	696.929	730.782	369.538
246	2.45	446.609	1232.4	40.3212	375.653	1215.24	-10.1767	517.814	1220.3	-7.26913	285.486	1055.71	-89.4862	633.877	1042.79	-95.8111	461.529	996.43	-3.80327	209.308	709.498	-79.1307	161.398	740.432	194.321	236.962	752.181	198.308	209.655	754.272	276.959	206.506	731.869	374.488	705.076	686.586	-76.5269	747.184	735.755	190.503	679.303	761.308	189.711	704.393	760.24	277.077	696.991	730.771	369.606
247	2.46	446.56	1232.69	39.5952	375.703	1215.41	-10.9541	517.738	1220.51	-8.05873	285.365	1055.5	-89.696	633.78	1042.96	-96.2501	461.63	996.645	-4.16733	209.515	709.196	-79.0157	161.329	740.452	194.334	236.92	752.2	198.304	209.635	754.243	276.99	206.458	731.872	374.479	705.231	686.825	-76.5036	747.22	735.749	190.58	679.411	761.491	189.828	704.481	760.318	277.049	697.032	730.766	369.64
248	2.47	446.461	1233.04	38.8564	375.428	1215.64	-11.6441	517.579	1220.78	-8.87343	285.187	1055.3	-89.9842	633.604	1043.18	-96.8221	461.684	996.918	-4.54427	209.718	708.874	-78.9435	161.444	740.317	194.088	236.864	752.24	198.264	209.508	754.47	276.752	206.373	731.87	374.448	705.433	687.093	-76.407	747.258	735.757	190.609	679.545	761.694	189.87	704.591	760.426	276.984	697.084	730.765	369.641
249	2.48	446.354	1233.42	38.2019	375.444	1215.82	-12.4461	517.401	1221.08	-9.6599	284.991	1055.08	-90.2846	633.395	1043.41	-97.4156	461.737	997.183	-4.7782	209.93	708.518	-78.8581	161.637	740.149	193.826	236.848	752.28	198.293	209.383	754.774	276.498	206.313	731.886	374.431	705.678	687.361	-76.1529	747.345	735.757	190.624	679.781	761.943	189.924	704.799	760.574	276.909	697.233	730.76	369.692
250	2.49	446.198	1233.78	37.5421	375.293	1216.01	-12.9822	517.179	1221.36	-10.4879	284.81	1054.86	-90.518	633.18	1043.63	-97.9703	461.794	997.433	-4.90635	210.181	708.155	-78.7067	161.365	740.405	194.183	236.869	752.31	198.366	209.505	754.411	276.906	206.302	731.885	374.472	706.033	687.712	-75.9831	747.554	735.73	190.724	680.158	762.272	189.985	705.16	760.797	276.933	697.506	730.73	369.802
251	2.5	445.989	1234.08	36.6824	375.072	1216.15	-13.507	516.876	1221.64	-11.4632	284.632	1054.64	-90.7259	632.945	1043.88	-98.5362	461.848	997.657	-5.11641	210.457	707.826	-78.5528	161.374	740.488	194.24	236.941	752.327	198.39	209.568	754.296	277.049	206.317	731.884	374.485	706.441	688.174	-75.9184	747.91	735.689	190.836	680.7	762.728	190.023	705.716	761.104	276.984	697.878	730.678	369.868
252	2.51	445.742	1234.34	35.7134	374.749	1216.24	-14.1823	516.533	1221.9	-12.4669	284.464	1054.43	-90.9446	632.674	1044.18	-99.1529	461.874	997.866	-5.43895	210.727	707.56	-78.4653	161.461	740.497	194.255	237.048	752.354	198.411	209.63	754.252	277.068	206.374	731.876	374.499	706.879	688.84	-76.0837	748.381	735.597	190.923	681.421	763.41	190.159	706.529	761.521	276.935	698.38	730.637	369.844
253	2.52	445.389	1234.52	34.6624	374.336	1216.32	-14.8646	516.164	1222.2	-13.4169	284.292	1054.25	-91.1348	632.361	1044.52	-99.7691	461.926	998.142	-5.65136	210.963	707.284	-78.3816	161.568	740.506	194.295	237.136	752.378	198.449	209.694	754.246	277.094	206.435	731.882	374.541	707.215	689.549	-76.1773	748.974	735.481	190.988	682.372	764.283	190.303	707.565	762.073	276.949	699.052	730.704	369.843
254	2.53	444.997	1234.78	33.9233	373.868	1216.37	-15.4618	515.697	1222.48	-14.3516	284.068	1054.11	-91.3409	631.986	1044.93	-100.311	461.976	998.445	-5.83448	211.115	707.047	-78.2751	161.628	740.523	194.343	237.191	752.409	198.534	209.733	754.253	277.166	206.466	731.891	374.6	707.383	690.31	-76.1947	749.68	735.4	191.114	683.503	765.37	190.442	708.785	762.792	277.025	699.875	730.865	369.901
255	2.54	444.561	1235.07	33.0924	373.395	1216.42	-16.0464	515.415	1222.75	-15.0847	283.784	1053.98	-91.5941	631.568	1045.37	-100.881	461.961	998.686	-6.28288	211.222	706.864	-78.2054	161.62	740.543	194.347	237.183	752.445	198.537	209.721	754.255	277.154	206.463	731.886	374.603	707.399	691.105	-76.2	750.458	735.419	191.332	684.783	766.769	190.446	710.153	763.704	276.837	700.84	731.017	369.886
256	2.55	444.094	1235.32	32.2913	372.862	1216.48	-16.7423	515.192	1223.04	-15.6769	283.485	1053.87	-91.877	631.096	1045.82	-101.538	461.881	998.932	-6.8575	211.29	706.69	-78.1769	161.566	740.554	194.314	237.135	752.481	198.489	209.661	754.252	277.104	206.406	731.884	374.552	707.277	691.778	-76.0472	751.3	735.651	191.507	686.309	768.526	190.413	711.689	764.861	276.792	701.925	731.124	369.746
257	2.56	443.63	1235.59	31.6505	372.31	1216.58	-17.4331	514.487	1223.32	-16.7014	283.188	1053.78	-92.1312	630.564	1046.31	-102.266	461.75	999.259	-7.2031	211.302	706.501	-78.1171	161.467	740.563	194.293	237.059	752.539	198.481	209.591	754.268	277.107	206.341	731.897	374.542	707.043	692.395	-75.8372	752.199	736.205	191.577	687.938	770.687	190.474	713.464	766.421	276.982	702.962	731.587	369.577
258	2.57	443.146	1235.85	30.9822	371.758	1216.66	-18.0939	514.085	1223.58	-17.4036	282.885	1053.72	-92.3614	630.036	1046.79	-102.965	461.593	999.597	-7.36985	211.283	706.32	-78.0871	161.376	740.56	194.35	236.952	752.604	198.508	209.531	754.29	277.144	206.266	731.893	374.536	706.696	693.029	-75.555	753.12	737.163	191.651	689.709	773.342	190.452	715.381	768.466	277.179	703.804	732.8	369.359
259	2.58	442.656	1236.06	30.2075	371.251	1216.71	-18.6615	513.362	1223.8	-18.3895	282.58	1053.66	-92.6053	629.551	1047.25	-103.644	461.452	999.877	-7.61782	211.252	706.184	-78.0819	161.305	740.536	194.37	236.857	752.63	198.519	209.47	754.291	277.143	206.205	731.876	374.497	706.204	693.634	-75.1173	754.082	738.537	191.585	691.618	776.506	190.263	717.382	771.036	277.238	704.716	734.962	368.961
260	2.59	442.198	1236.18	29.3802	370.772	1216.76	-19.2796	513.284	1223.98	-18.8558	282.284	1053.64	-92.8937	629.075	1047.74	-104.433	461.348	1000.13	-7.86816	211.247	706.106	-78.0893	161.263	740.522	194.358	236.798	752.649	198.502	209.418	754.289	277.092	206.193	731.879	374.474	705.63	694.19	-74.4324	755.012	740.417	191.541	693.592	780.197	190.002	719.403	774.371	277.153	705.712	738.345	368.592
261	2.6	441.844	1236.39	28.7354	370.331	1216.82	-19.8587	512.723	1224.11	-19.7217	282.019	1053.66	-93.1419	628.58	1048.24	-105.251	461.265	1000.34	-8.11937	211.248	706.096	-78.0863	161.241	740.502	194.403	236.778	752.687	198.535	209.407	754.308	277.091	206.21	731.892	374.488	705.157	694.946	-73.9386	755.781	742.923	191.456	695.487	784.52	189.607	721.342	778.707	276.838	706.687	743.102	368.377
262	2.61	441.535	1236.54	28.0228	369.97	1216.88	-20.3534	512.094	1224.24	-20.7374	281.796	1053.76	-93.3144	628.076	1048.78	-106.108	461.243	1000.55	-8.39954	211.249	706.151	-78.06	161.237	740.468	194.44	236.759	752.717	198.536	209.405	754.328	277.099	206.249	731.909	374.516	704.809	695.879	-73.613	756.449	746.243	191.232	697.177	789.437	188.879	723.024	783.994	276.42	707.711	749.501	368.189
263	2.62	441.28	1236.63	27.3481	369.666	1216.94	-20.8164	512.102	1224.44	-21.1032	281.594	1053.92	-93.4105	627.56	1049.41	-107.082	461.216	1000.76	-8.79951	211.284	706.234	-78.0426	161.216	740.447	194.414	236.711	752.743	198.494	209.397	754.358	277.074	206.276	731.912	374.5	704.593	696.897	-73.2017	756.981	750.379	191.039	698.671	795.004	188.013	724.364	790.372	276.089	708.607	757.666	368.008
264	2.63	441.063	1236.79	26.7836	369.415	1217.01	-21.1746	511.889	1224.63	-21.6276	281.381	1054.09	-93.4262	626.991	1050.05	-108.135	461.179	1000.98	-9.22525	211.316	706.358	-78.0582	161.151	740.429	194.364	236.65	752.778	198.457	209.351	754.396	277.021	206.242	731.915	374.452	704.468	697.941	-72.5415	757.273	755.315	190.927	699.834	801.118	186.886	725.335	797.836	275.65	709.24	767.511	367.772
265	2.64	440.935	1236.95	26.3796	369.232	1217.09	-21.4584	511.685	1224.81	-22.1855	281.173	1054.27	-93.3528	626.338	1050.69	-109.317	461.171	1001.23	-9.55603	211.32	706.472	-78.0469	161.075	740.427	194.365	236.565	752.812	198.438	209.279	754.414	276.981	206.18	731.923	374.432	704.377	698.991	-71.4381	757.351	760.916	190.924	700.699	807.752	185.731	725.944	806.333	275.093	709.549	778.895	367.495
266	2.65	440.994	1237.15	26.2666	369.152	1217.18	-21.6602	511.556	1224.96	-22.819	281.016	1054.42	-93.2131	625.675	1051.32	-110.628	461.229	1001.46	-9.90401	211.304	706.555	-77.9812	161.039	740.453	194.405	236.499	752.849	198.47	209.234	754.414	276.996	206.145	731.916	374.488	704.439	700.133	-70.0885	757.196	767.166	191.043	701.33	814.909	184.52	726.367	815.728	274.286	709.512	791.464	367.012
267	2.66	441.192	1237.23	25.9472	369.226	1217.25	-21.8059	511.55	1225.05	-23.5571	280.89	1054.56	-93.0544	625.081	1051.92	-112.129	461.356	1001.67	-10.3742	211.285	706.638	-77.9163	161.028	740.488	194.448	236.501	752.884	198.553	209.239	754.436	277.077	206.128	731.908	374.548	704.689	701.396	-68.5546	756.843	774.107	191.222	701.802	822.585	183.017	726.741	825.495	272.595	709.022	805.101	366.184
268	2.67	441.509	1237.22	25.3995	369.414	1217.29	-21.9626	511.659	1225.07	-24.3503	280.807	1054.7	-92.9569	624.501	1052.47	-113.727	461.538	1001.85	-10.8133	211.234	706.749	-77.8727	161.234	740.38	194.28	236.533	752.912	198.65	209.181	754.631	276.918	206.122	731.891	374.589	705.02	702.671	-66.4999	756.37	781.748	191.343	702.115	830.744	181.351	726.882	835.605	270.03	708.129	819.745	365.045
269	2.68	441.968	1237.22	24.9833	369.681	1217.34	-22.0003	511.851	1225.06	-25.054	280.749	1054.86	-92.836	623.904	1053.02	-115.274	461.715	1002.03	-11.1835	211.143	706.904	-77.8441	161.476	740.217	194.089	236.552	752.935	198.729	209.101	754.872	276.702	206.137	731.875	374.61	705.499	704.141	-64.1314	755.614	789.764	191.734	702.259	839.279	179.678	726.659	846.788	268.001	707.079	835.501	363.736
270	2.69	442.541	1237.23	24.7223	370.025	1217.39	-21.9314	512.089	1225.02	-25.6887	280.734	1055.06	-92.8138	623.259	1053.6	-116.874	461.869	1002.22	-11.4575	211.022	707.135	-77.8984	161.177	740.513	194.558	236.558	752.985	198.842	209.226	754.505	277.135	206.159	731.86	374.661	706.136	705.8	-61.4362	754.355	797.827	192.538	702.341	848.328	178.14	726.103	858.954	265.996	705.897	852.083	362.057
271	2.7	443.217	1237.29	24.5718	370.386	1217.47	-21.8966	512.383	1225.01	-26.3767	280.736	1055.3	-92.8574	622.596	1054.13	-118.565	462.028	1002.42	-11.7713	210.831	707.441	-78.0151	161.267	740.472	194.558	236.519	753.04	198.899	209.196	754.624	277.08	206.175	731.865	374.717	706.822	707.562	-58.3476	753.201	806.389	193.393	702.48	857.81	176.636	725.282	871.822	264.01	704.439	869.398	359.989
272	2.71	443.909	1237.4	24.1473	370.775	1217.59	-21.8587	512.745	1225.06	-27.1152	280.644	1055.53	-92.6101	621.936	1054.63	-120.361	462.24	1002.63	-12.1829	210.544	707.76	-78.1121	161.414	740.334	194.357	236.44	753.107	198.883	209.083	754.873	276.841	206.164	731.88	374.71	707.537	709.515	-54.9441	751.963	815.291	194.285	703.171	867.801	174.255	725.278	884.486	261.209	702.816	887.199	357.331
273	2.72	444.66	1237.56	23.7331	371.241	1217.71	-21.7399	513.142	1225.16	-27.8089	280.631	1055.76	-92.5127	621.233	1055.17	-122.054	462.502	1002.85	-12.6606	210.207	708.038	-78.1563	161.029	740.618	194.704	236.358	753.182	198.87	209.16	754.533	277.149	206.151	731.896	374.702	708.209	711.628	-51.1647	750.424	824.383	195.484	704.351	878.133	171.161	725.622	897.571	257.709	701.129	905.38	354.061
274	2.73	445.51	1237.73	23.4742	371.818	1217.78	-21.4687	513.569	1225.28	-28.5849	280.65	1055.96	-92.4416	620.343	1055.68	-123.57	462.788	1003.07	-13.0969	209.852	708.303	-78.2095	160.897	740.69	194.822	236.268	753.224	198.852	209.157	754.445	277.226	206.166	731.912	374.707	708.758	713.987	-47.1337	748.777	833.743	196.92	704.948	888.005	169.816	724.838	910.257	256.392	699.446	923.824	350.338
275	2.74	446.433	1237.97	23.1895	372.465	1217.88	-21.1905	514.047	1225.44	-29.4718	280.702	1056.17	-92.4171	619.245	1056.28	-124.727	463.033	1003.27	-13.5635	209.531	708.548	-78.2605	160.999	740.536	194.643	236.188	753.244	198.81	209.061	754.62	277.024	206.184	731.904	374.68	709.146	716.458	-42.7088	747.016	843.464	198.417	704.888	897.714	169.348	723.415	921.944	255.199	697.134	941.648	346.511
276	2.75	447.292	1238.15	22.6258	373.085	1218	-21.0523	514.555	1225.61	-30.3579	280.784	1056.37	-92.405	618.71	1056.92	-126.28	463.247	1003.43	-14.0131	209.228	708.776	-78.2141	161.153	740.323	194.378	236.109	753.234	198.715	208.934	754.851	276.719	206.172	731.885	374.607	709.663	719.561	-38.4744	744.361	853.25	199.642	704.822	907.668	167.485	721.946	934.479	252.659	694.312	959.224	342.278
277	2.76	448.197	1238.46	22.1963	373.671	1218.14	-20.9867	515.068	1225.79	-31.1967	280.916	1056.6	-92.335	618.489	1057.22	-128.536	463.489	1003.65	-14.3317	208.939	709.065	-78.1802	160.809	740.545	194.733	236.06	753.213	198.722	209.029	754.479	277.04	206.151	731.858	374.603	710.295	723.226	-34.366	741.32	863.625	200.292	704.101	917.534	165.146	719.835	947.297	249.489	690.837	976.593	337.581
278	2.77	449.085	1238.87	21.9573	374.28	1218.33	-20.96	515.573	1226.01	-32.0496	281.104	1056.89	-92.2252	617.972	1057.72	-130.084	463.765	1003.93	-14.616	208.69	709.416	-78.1916	160.724	740.61	194.898	236.044	753.203	198.806	209.054	754.387	277.181	206.149	731.859	374.661	710.395	725.683	-28.9937	738.24	874.619	200.464	702.592	927.309	162.461	716.796	960.175	246.258	686.288	993.901	331.783
279	2.78	449.912	1239.24	21.5127	374.917	1218.54	-21.0021	516.078	1226.27	-32.9353	281.356	1057.22	-92.1182	617.422	1058.22	-131.423	464.087	1004.26	-14.914	208.493	709.749	-78.1833	160.876	740.506	194.808	236.048	753.194	198.839	209.003	754.587	277.077	206.164	731.874	374.703	710.544	728.098	-23.3476	735.008	885.911	200.235	700.406	937.041	159.585	713.067	972.945	242.563	680.398	1011.21	324.633
280	2.79	450.69	1239.62	20.9128	375.497	1218.71	-21.1772	516.555	1226.54	-33.7328	281.642	1057.55	-92.0828	616.762	1058.71	-132.622	464.403	1004.55	-15.2899	208.353	710.097	-78.1945	161.264	740.212	194.377	236.054	753.202	198.843	208.845	755.084	276.596	206.194	731.877	374.709	710.967	730.988	-17.9964	731.384	897.07	199.919	698.096	946.779	156.121	708.633	985.762	238.012	674.129	1027.82	317.348
281	2.8	451.399	1239.98	20.4047	376.005	1218.84	-21.335	517.007	1226.86	-34.4815	281.93	1057.86	-92.0738	615.989	1059.38	-133.52	464.732	1004.89	-15.5693	208.207	710.496	-78.2216	161.369	740.134	194.266	236.036	753.213	198.83	208.803	755.219	276.449	206.222	731.868	374.704	711.638	734.4	-13.0719	727.258	908.267	199.311	695.777	956.47	152.004	703.503	998.587	232.646	667.066	1043.76	309.549
282	2.81	452.036	1240.41	20.0968	376.519	1219.02	-21.4063	517.429	1227.2	-35.1439	282.218	1058.17	-92.0288	615.304	1060.3	-134.104	465.032	1005.25	-15.6695	208.068	710.942	-78.2611	161.412	740.125	194.295	236.036	753.236	198.886	208.788	755.258	276.468	206.245	731.862	374.758	712.409	738.081	-8.20692	722.51	919.172	198.581	692.411	965.598	148.637	697.824	1010.68	227.465	659.118	1059.02	301.275
283	2.82	452.601	1240.83	19.7144	377.001	1219.27	-21.5151	517.818	1227.52	-35.7285	282.546	1058.5	-92.0233	614.879	1061.05	-135.012	465.266	1005.56	-15.8392	207.972	711.426	-78.3554	161.234	740.292	194.538	236.024	753.252	198.912	208.832	755.057	276.685	206.249	731.849	374.803	713.222	741.848	-3.32502	716.927	929.702	197.817	688.724	974.229	145.243	691.66	1022.25	222.111	650.353	1073.68	292.563
284	2.83	453.116	1241.27	19.3448	377.426	1219.54	-21.6581	518.167	1227.85	-36.2482	282.887	1058.87	-92.1063	614.721	1061.48	-136.707	465.267	1006.09	-15.3913	207.921	711.928	-78.4713	160.81	740.657	195.004	236	753.268	198.922	208.945	754.582	277.104	206.251	731.829	374.841	714.03	745.698	1.42119	710.394	939.836	196.914	685.744	982.648	140.995	685.107	1033.21	216.493	641.138	1087.66	282.952
285	2.84	453.553	1241.59	18.9516	377.73	1219.71	-21.6254	518.48	1228.1	-36.7202	283.251	1059.23	-92.1762	614.3	1062.09	-137.742	465.5	1006.42	-15.3808	207.944	712.406	-78.5895	160.891	740.591	194.934	236.005	753.262	198.949	208.88	754.676	277	206.256	731.8	374.886	714.756	749.591	6.07785	703.587	949.462	195.705	682.214	990.513	137.208	678.273	1043.58	210.56	631.945	1101.14	271.792
286	2.85	453.921	1241.84	18.5354	377.852	1219.71	-21.5272	518.797	1228.31	-37.1787	283.62	1059.53	-92.2632	613.888	1062.71	-138.47	466.69	1005.72	-18.1822	208.062	712.807	-78.684	161.294	740.271	194.483	236.048	753.25	199.019	208.714	755.12	276.594	206.277	731.778	374.944	715.304	753.169	11.0971	696.365	958.688	194.264	678.468	997.931	133.45	671.38	1053.66	204.353	622.982	1113.95	258.845
287	2.86	454.283	1242.1	18.2737	378.099	1219.77	-21.7616	519.104	1228.48	-37.6681	283.989	1059.78	-92.3848	613.489	1063.35	-139.149	467.249	1005.8	-18.8304	208.238	713.125	-78.7271	161.422	740.197	194.325	236.1	753.248	199.079	208.672	755.223	276.489	206.306	731.754	375	715.612	756.376	16.671	688.759	967.512	192.348	674.521	1004.95	129.586	664.434	1063.41	197.679	613.279	1125.24	246.334
288	2.87	454.559	1242.3	17.9322	378.339	1219.86	-21.9885	519.345	1228.64	-38.0701	284.349	1060.01	-92.5466	613.091	1064.01	-139.829	467.225	1006.21	-17.9039	208.468	713.384	-78.7244	161.489	740.178	194.272	236.154	753.246	199.121	208.626	755.245	276.451	206.317	731.733	375.005	715.57	760.116	21.3457	680.903	976.028	190.175	670.4	1011.61	125.616	657.102	1072.02	190.858	603.514	1135.56	233.884
289	2.88	454.768	1242.6	17.6671	378.607	1220.03	-22.3305	519.526	1228.83	-38.3748	284.729	1060.23	-92.7532	612.652	1064.75	-140.507	466.995	1006.7	-16.5714	208.773	713.623	-78.6883	161.528	740.169	194.241	236.175	753.276	199.163	208.581	755.276	276.445	206.32	731.732	375.062	715.191	763.919	25.8663	672.929	984.26	187.73	666.064	1017.99	121.483	649.721	1080.17	183.948	593.833	1145.54	222.669
290	2.89	454.91	1242.99	17.4276	378.967	1220.29	-22.7571	519.665	1229.05	-38.6181	285.115	1060.46	-93.0093	612.188	1065.57	-141.197	467.746	1006.55	-18.7135	209.103	713.92	-78.6592	161.554	740.19	194.219	236.197	753.336	199.23	208.528	755.297	276.479	206.318	731.762	375.148	714.679	767.52	30.5311	664.801	992.077	184.452	661.701	1023.97	117.355	642.359	1087.79	176.812	584.375	1155.47	213.159
291	2.9	455.055	1243.37	17.2252	379.181	1220.47	-23.0037	519.793	1229.31	-38.8305	285.476	1060.7	-93.303	611.773	1066.22	-141.656	468.03	1006.71	-19.2955	209.435	714.273	-78.7056	161.586	740.218	194.219	236.211	753.407	199.322	208.479	755.325	276.532	206.317	731.771	375.227	714.041	770.852	35.4592	656.599	999.302	180.242	657.355	1029.59	113.186	635.071	1094.91	169.554	575.643	1163.88	202.028
292	2.91	455.223	1243.67	16.8896	379.373	1220.63	-23.2154	519.957	1229.61	-39.0953	285.812	1060.9	-93.6512	611.4	1066.79	-142.036	467.802	1007.21	-18.3167	209.752	714.589	-78.7509	161.632	740.21	194.198	236.261	753.455	199.395	208.443	755.342	276.545	206.314	731.769	375.235	712.779	774.459	39.8497	648.842	1006.13	176.229	653.066	1034.89	108.862	627.981	1101.48	162.093	567.352	1171.24	190.623
293	2.92	455.399	1244.01	16.538	379.558	1220.8	-23.437	520.127	1229.92	-39.4297	286.125	1061.04	-94.0415	611.083	1067.27	-142.309	467.149	1008.09	-15.7769	210.044	714.832	-78.7562	161.671	740.198	194.13	236.317	753.484	199.444	208.429	755.363	276.523	206.324	731.748	375.223	711.231	777.961	44.0331	641.36	1012.47	171.973	648.87	1039.72	104.594	620.963	1107.46	154.803	559.56	1178.08	179.381
294	2.93	455.547	1244.34	16.2372	379.747	1221	-23.6538	520.267	1230.18	-39.715	286.407	1061.15	-94.4042	610.767	1067.68	-142.486	467.253	1008.33	-15.92	210.26	715.003	-78.7341	161.714	740.203	194.105	236.383	753.492	199.506	208.422	755.351	276.532	206.329	731.708	375.295	709.437	781.252	47.9264	634.199	1018.21	167.686	644.805	1044.04	100.429	613.957	1112.79	147.985	551.965	1183.64	168.241
295	2.94	455.665	1244.69	15.8427	379.896	1221.17	-23.8678	520.379	1230.41	-39.9719	286.639	1061.21	-94.6661	610.445	1068.1	-142.647	467.43	1008.48	-16.599	210.433	715.073	-78.65	161.721	740.175	194.091	236.425	753.47	199.551	208.393	755.311	276.54	206.331	731.676	375.386	707.583	784.311	51.4361	627.27	1023.4	163.332	641.072	1047.95	96.3324	607.425	1117.44	140.964	544.707	1188.25	157.263
296	2.95	455.729	1245.14	15.3614	379.97	1221.37	-24.1609	520.465	1230.65	-40.2552	286.854	1061.25	-94.9634	610.153	1068.48	-142.794	467.466	1008.65	-17.0807	210.595	715.104	-78.5825	161.734	740.145	194.044	236.45	753.459	199.541	208.343	755.283	276.495	206.306	731.643	375.377	705.688	787.041	54.9562	620.532	1028	158.796	637.648	1051.43	92.3859	601.242	1121.49	133.925	537.893	1192.37	146.926
297	2.96	455.751	1245.72	14.977	379.981	1221.6	-24.4814	520.494	1230.88	-40.6081	287.035	1061.32	-95.3259	609.847	1068.83	-142.969	467.425	1008.87	-17.3577	210.755	715.117	-78.5591	161.762	740.129	193.961	236.459	753.472	199.535	208.303	755.28	276.427	206.28	731.627	375.339	703.624	789.523	58.9169	614.083	1031.96	154.195	634.175	1054.33	88.4757	595.402	1124.96	127.077	531.553	1195.33	136.061
298	2.97	455.676	1246.3	14.5306	379.969	1221.89	-24.7499	520.461	1231.11	-40.951	287.189	1061.36	-95.6545	609.829	1069.06	-142.852	467.339	1009.13	-17.4569	210.892	715.141	-78.5662	161.802	740.136	193.953	236.468	753.513	199.591	208.269	755.313	276.451	206.284	731.645	375.376	701.68	791.914	61.8967	607.915	1035.4	149.768	630.792	1056.8	84.7351	589.844	1127.97	120.425	525.522	1197.76	125.987
299	2.98	455.608	1246.9	14.3414	379.913	1222.22	-25.0047	520.386	1231.4	-41.331	287.305	1061.38	-95.9452	609.976	1069.25	-142.528	467.239	1009.42	-17.4194	210.993	715.177	-78.551	161.842	740.158	194.009	236.492	753.583	199.689	208.247	755.356	276.545	206.291	731.669	375.457	699.806	794.097	64.4109	602.078	1038.35	145.46	627.59	1058.87	81.3003	584.553	1130.52	114.077	519.923	1199.63	116.631
300	2.99	455.483	1247.51	13.9159	379.821	1222.55	-25.3488	520.266	1231.75	-41.7453	287.387	1061.41	-96.2226	609.167	1069.8	-142.913	467.106	1009.68	-17.4429	211.023	715.24	-78.5198	161.859	740.18	194.031	236.51	753.665	199.774	208.222	755.397	276.629	206.302	731.69	375.505	698.027	796.11	66.6704	596.56	1040.7	141.143	624.591	1060.6	78.0639	579.631	1132.44	108.151	514.746	1201.09	107.76
301	3	455.251	1248.1	13.2787	379.664	1222.86	-25.8083	520.115	1232.11	-42.1618	287.423	1061.44	-96.5076	608.302	1070.28	-143.224	466.917	1009.99	-17.3287	210.992	715.334	-78.5067	161.852	740.202	194.037	236.494	753.706	199.804	208.179	755.436	276.629	206.321	731.701	375.547	696.301	797.859	68.7019	591.385	1042.54	136.956	621.733	1061.98	75.03	575.085	1133.99	102.48	510.069	1202.15	99.3851
302	3.01	455.002	1248.56	12.7194	379.462	1223.16	-26.3365	519.903	1232.45	-42.5313	287.416	1061.47	-96.7565	607.618	1070.58	-143.307	466.709	1010.31	-17.0941	210.894	715.404	-78.4745	161.838	740.208	194.053	236.455	753.726	199.848	208.145	755.4	276.658	206.333	731.69	375.616	694.664	799.385	70.5466	586.591	1044.04	133.108	618.997	1063.03	72.2108	570.877	1135.08	97.3115	505.677	1202.63	91.2219
303	3.02	454.766	1248.97	12.2536	379.213	1223.41	-26.8986	519.622	1232.75	-42.8802	287.351	1061.5	-96.9773	606.93	1070.8	-143.423	466.502	1010.56	-16.9156	210.719	715.476	-78.4429	161.791	740.185	194.065	236.419	753.718	199.906	208.096	755.351	276.702	206.344	731.643	375.683	693.045	800.672	72.0728	582.197	1045.18	129.404	616.388	1063.77	69.569	567.114	1135.87	92.5334	501.615	1202.58	83.2045
304	3.03	454.437	1249.35	11.6054	378.927	1223.62	-27.4778	519.375	1233	-43.2788	287.243	1061.57	-97.2056	606.614	1070.72	-143.092	466.264	1010.71	-16.8961	210.49	715.57	-78.4099	161.711	740.117	194.026	236.34	753.715	199.873	208.012	755.315	276.714	206.323	731.606	375.641	691.51	801.761	73.2819	578.165	1045.95	125.809	613.94	1064.27	67.0468	563.787	1136.32	88.0766	498.471	1202.75	76.4106
305	3.04	454.024	1249.76	10.8809	378.619	1223.79	-28.0117	519.086	1233.25	-43.6814	287.111	1061.65	-97.4449	606.966	1070.24	-141.934	465.999	1010.82	-16.9498	210.285	715.684	-78.4016	161.637	740.052	193.967	236.255	753.731	199.823	207.909	755.302	276.635	206.299	731.578	375.614	690.011	802.619	74.3076	574.481	1046.54	122.497	611.652	1064.56	64.6171	560.888	1136.45	84.0813	495.954	1202.93	70.5888
306	3.05	453.589	1250.15	10.4601	378.275	1223.9	-28.5169	518.749	1233.44	-44.0628	286.968	1061.73	-97.6427	606.801	1070.19	-141.64	465.714	1010.97	-16.8765	210.093	715.811	-78.4193	161.59	740.037	193.968	236.204	753.783	199.89	207.83	755.323	276.652	206.288	731.584	375.655	688.476	803.289	75.2086	571.219	1047.03	119.632	609.509	1064.71	62.342	558.31	1136.58	80.4181	493.912	1203.12	65.7772
307	3.06	453.11	1250.5	10.0275	377.906	1224.01	-29.0376	518.372	1233.59	-44.4553	286.818	1061.82	-97.8379	606.524	1070.21	-141.525	465.437	1011.15	-16.8052	209.878	715.952	-78.4033	161.561	740.063	194.046	236.171	753.863	200.009	207.771	755.355	276.755	206.276	731.624	375.744	687.014	803.817	75.852	568.293	1047.39	117.127	607.584	1064.8	60.3298	555.982	1136.66	77.124	492.149	1203.28	61.5992
308	3.07	452.612	1250.67	9.54461	377.522	1224.09	-29.5523	517.999	1233.72	-44.8239	286.656	1061.93	-98.0553	606.239	1070.21	-141.454	465.154	1011.27	-16.9587	209.623	716.104	-78.3011	161.525	740.109	194.163	236.122	753.938	200.085	207.727	755.398	276.844	206.276	731.636	375.831	685.55	804.2	76.4355	565.647	1047.59	114.777	605.968	1064.82	58.672	553.885	1136.7	74.2729	490.546	1203.34	57.9385
309	3.08	452.219	1250.79	9.02335	377.197	1224.15	-30.0172	517.697	1233.82	-45.1679	286.507	1062.02	-98.2137	605.963	1070.18	-141.443	464.917	1011.34	-17.1024	209.336	716.268	-78.2234	161.501	740.127	194.256	236.104	753.982	200.147	207.71	755.42	276.922	206.304	731.647	375.897	684.17	804.466	76.8534	563.283	1047.67	112.786	604.564	1064.86	57.4765	551.952	1136.71	71.8995	489.006	1203.23	54.7967
310	3.09	451.962	1250.98	8.78724	376.951	1224.18	-30.3715	517.446	1233.91	-45.4465	286.382	1062.11	-98.3078	605.701	1070.15	-141.5	464.72	1011.42	-17.1491	209.005	716.45	-78.1995	161.496	740.137	194.364	236.09	754.01	200.245	207.712	755.421	277.026	206.366	731.66	375.996	682.801	804.656	77.1588	561.059	1047.67	111.093	603.328	1064.92	56.5958	550.114	1136.66	69.961	487.473	1203.02	52.1544
311	3.1	451.804	1251.11	8.5051	376.761	1224.18	-30.6066	517.261	1233.96	-45.6904	286.243	1062.19	-98.3571	605.426	1070.11	-141.609	464.528	1011.48	-17.305	208.638	716.631	-78.1648	161.46	740.145	194.45	236.049	754.009	200.311	207.693	755.41	277.05	206.385	731.644	376.045	681.463	804.822	77.4201	559.014	1047.55	109.543	602.191	1064.95	56.0168	548.364	1136.6	68.3674	485.282	1202.44	49.0664
312	3.11	451.664	1251.18	8.19644	376.616	1224.21	-30.7726	517.481	1233.93	-45.0797	286.086	1062.26	-98.3715	605.124	1070.1	-141.759	464.311	1011.47	-17.593	208.26	716.786	-78.1856	161.39	740.139	194.448	235.99	753.997	200.32	207.667	755.38	277.058	206.391	731.61	376.082	680.206	804.956	77.6278	557.16	1047.4	108.216	601.06	1064.98	55.5097	546.709	1136.51	67.0734	482.307	1201.31	45.2298
313	3.12	451.519	1251.33	7.95792	376.477	1224.28	-30.8892	518.065	1233.87	-43.374	285.883	1062.35	-98.3757	604.803	1070.1	-141.959	464.088	1011.51	-17.6956	207.909	716.955	-78.2982	161.331	740.121	194.423	235.918	754.003	200.266	207.629	755.382	277.017	206.368	731.57	376.042	679.011	805.065	77.7728	555.414	1047.29	107.149	599.941	1065	55.1953	545.139	1136.44	66.0432	480.557	1200.62	42.8838
314	3.13	451.402	1251.48	7.87094	376.313	1224.39	-31.0161	518.016	1233.9	-43.3335	285.647	1062.43	-98.3775	604.472	1070.09	-142.11	463.824	1011.64	-17.5676	207.581	717.121	-78.4466	161.265	740.079	194.412	235.816	754.014	200.254	207.565	755.388	277	206.326	731.569	376.026	677.837	805.134	77.8538	553.797	1047.19	106.378	598.826	1065.02	54.9197	543.739	1136.33	65.3143	479.323	1200.46	41.6321
315	3.14	451.238	1251.53	7.73289	376.131	1224.51	-31.1342	517.867	1233.88	-43.4541	285.411	1062.51	-98.3733	604.13	1070.09	-142.162	463.529	1011.77	-17.4207	207.299	717.237	-78.4973	161.193	740.056	194.433	235.717	754.035	200.257	207.483	755.423	277.051	206.273	731.584	376.069	676.81	805.209	77.8956	552.486	1047.16	105.962	597.803	1065.02	54.7345	542.659	1136.26	64.8127	478.595	1200.64	41.1688
316	3.15	451.096	1251.54	7.5633	375.946	1224.57	-31.2873	517.715	1233.84	-43.5583	285.217	1062.59	-98.3988	603.823	1070.1	-142.202	463.276	1011.84	-17.394	207.073	717.322	-78.4935	161.14	740.053	194.477	235.645	754.069	200.277	207.423	755.448	277.07	206.253	731.61	376.11	675.918	805.257	77.8924	551.413	1047.19	105.846	596.946	1065.04	54.6656	541.981	1136.32	64.6509	478.129	1200.95	40.9453
317	3.16	450.908	1251.57	7.33078	375.773	1224.63	-31.4982	517.564	1233.8	-43.6511	285.052	1062.62	-98.4279	603.536	1070.12	-142.255	463.085	1011.85	-17.467	206.91	717.387	-78.498	161.126	740.07	194.533	235.626	754.127	200.324	207.41	755.475	277.097	206.302	731.637	376.164	675.129	805.269	77.7698	550.618	1047.29	105.837	596.288	1065.07	54.8362	541.602	1136.52	64.7849	477.882	1201.25	40.6628
318	3.17	450.692	1251.52	7.07073	375.606	1224.64	-31.7144	517.419	1233.74	-43.7279	284.905	1062.63	-98.4417	603.261	1070.14	-142.282	462.921	1011.8	-17.5841	206.759	717.409	-78.4548	161.119	740.089	194.587	235.637	754.15	200.405	207.417	755.501	277.132	206.356	731.63	376.221	674.335	805.281	77.6843	550.073	1047.43	105.994	595.849	1065.17	55.2026	541.406	1136.84	65.1204	477.711	1201.5	40.4913
319	3.18	450.591	1251.54	7.04885	375.456	1224.63	-31.8198	517.266	1233.67	-43.7475	284.736	1062.62	-98.4514	602.983	1070.18	-142.279	462.769	1011.77	-17.6528	206.596	717.396	-78.3653	161.091	740.072	194.641	235.641	754.162	200.497	207.423	755.491	277.201	206.373	731.622	376.304	673.567	805.314	77.6236	549.65	1047.6	106.284	595.523	1065.34	55.6387	541.308	1137.21	65.6108	477.493	1201.76	40.4491
320	3.19	450.476	1251.54	6.99819	375.308	1224.64	-31.8673	517.126	1233.63	-43.7879	284.558	1062.63	-98.4546	602.724	1070.24	-142.281	462.606	1011.76	-17.7191	206.448	717.383	-78.312	161.047	740.046	194.674	235.601	754.196	200.529	207.416	755.484	277.246	206.374	731.608	376.352	672.886	805.439	77.6021	549.227	1047.83	106.634	595.234	1065.57	56.0286	541.237	1137.65	66.1406	477.187	1202.01	40.2755
321	3.2	450.319	1251.56	6.93899	375.164	1224.67	-31.8888	516.98	1233.64	-43.8162	284.37	1062.66	-98.4866	602.507	1070.34	-142.304	462.423	1011.78	-17.7927	206.328	717.366	-78.3169	161.008	740.007	194.637	235.52	754.209	200.443	207.355	755.473	277.184	206.327	731.579	376.271	672.299	805.658	77.674	548.742	1048.11	106.824	594.932	1065.86	56.3259	541.175	1138.14	66.6169	476.853	1202.25	40.0396
322	3.21	450.136	1251.58	6.91396	374.99	1224.7	-31.8952	516.813	1233.7	-43.7507	284.176	1062.7	-98.4893	602.31	1070.47	-142.297	462.214	1011.81	-17.8282	206.208	717.358	-78.2866	160.948	739.97	194.564	235.423	754.227	200.371	207.274	755.471	277.119	206.248	731.561	376.193	671.737	805.944	77.8419	548.259	1048.55	107.078	594.554	1066.16	56.5982	541.147	1138.67	67.0365	476.51	1202.43	39.7659
323	3.22	450.015	1251.59	7.15756	374.817	1224.7	-31.7695	516.616	1233.79	-43.6888	284.012	1062.76	-98.4065	602.121	1070.62	-142.252	462.031	1011.86	-17.6981	206.096	717.355	-78.2248	160.887	739.933	194.531	235.352	754.251	200.356	207.211	755.493	277.146	206.198	731.586	376.214	671.226	806.268	78.0753	547.868	1049.02	107.343	594.125	1066.42	56.7744	541.169	1139.23	67.3918	476.145	1202.61	39.4688
324	3.23	449.953	1251.6	7.57081	374.688	1224.68	-31.5947	516.433	1233.83	-43.6624	283.899	1062.78	-98.3155	601.987	1070.75	-142.222	461.902	1011.91	-17.5748	206.047	717.342	-78.1727	160.858	739.906	194.548	235.316	754.282	200.399	207.184	755.514	277.159	206.191	731.596	376.244	670.795	806.604	78.3221	547.616	1049.45	107.578	593.742	1066.62	56.8131	541.295	1139.79	67.6465	475.831	1202.75	39.1621
325	3.24	449.849	1251.5	7.63795	374.572	1224.61	-31.4814	516.27	1233.81	-43.6466	283.826	1062.77	-98.298	601.919	1070.85	-142.174	461.843	1011.89	-17.6029	206.064	717.328	-78.1844	160.858	739.905	194.534	235.312	754.293	200.381	207.198	755.528	277.125	206.207	731.585	376.176	670.519	806.929	78.5862	547.494	1049.88	107.736	593.425	1066.8	56.6835	541.498	1140.31	67.7171	475.606	1202.9	38.7249
326	3.25	449.775	1251.41	7.79539	374.496	1224.48	-31.3154	516.136	1233.76	-43.6011	283.805	1062.72	-98.2369	601.89	1070.91	-142.104	461.853	1011.86	-17.6274	206.093	717.282	-78.2007	160.882	739.915	194.535	235.344	754.292	200.391	207.231	755.536	277.139	206.28	731.58	376.182	670.388	807.229	78.8418	547.478	1050.31	107.898	593.148	1066.96	56.5008	541.712	1140.73	67.6858	475.476	1203.04	38.2665
327	3.26	449.656	1251.27	7.89366	374.444	1224.37	-31.127	516.033	1233.7	-43.5563	283.811	1062.64	-98.1475	601.882	1070.97	-142.033	461.892	1011.83	-17.5279	206.145	717.184	-78.1683	160.92	739.933	194.609	235.414	754.272	200.476	207.27	755.552	277.222	206.35	731.591	376.283	670.359	807.543	79.1157	547.513	1050.74	108.154	592.915	1067.12	56.3944	541.924	1141.06	67.6195	475.452	1203.19	37.9731
328	3.27	449.564	1251.18	7.96565	374.368	1224.25	-31.0078	515.932	1233.63	-43.4762	283.811	1062.54	-98.1274	601.889	1071.04	-141.967	461.91	1011.74	-17.5372	206.247	717.071	-78.1805	160.95	739.913	194.648	235.463	754.265	200.511	207.31	755.568	277.291	206.4	731.6	376.349	670.422	807.871	79.4043	547.761	1050.88	107.767	592.782	1067.31	56.3618	542.086	1141.37	67.6023	475.426	1203.28	37.6352
329	3.28	449.419	1251.12	8.03969	374.249	1224.17	-30.955	515.819	1233.61	-43.3915	283.779	1062.44	-98.1401	601.892	1071.14	-141.886	461.876	1011.67	-17.5317	206.384	716.948	-78.2261	160.947	739.888	194.575	235.443	754.273	200.47	207.29	755.579	277.236	206.409	731.583	376.299	670.51	808.185	79.6645	548.015	1050.91	107.169	592.719	1067.54	56.4273	542.175	1141.69	67.7695	475.303	1203.31	37.3289
330	3.29	449.21	1251.09	8.27517	374.087	1224.15	-30.8907	515.681	1233.63	-43.254	283.712	1062.36	-98.1008	601.851	1071.26	-141.771	461.789	1011.7	-17.3309	206.544	716.787	-78.2908	160.912	739.859	194.499	235.383	754.27	200.438	207.223	755.575	277.194	206.348	731.582	376.264	670.592	808.485	79.9169	547.667	1051.68	108.652	592.69	1067.82	56.6467	542.229	1142.01	68.1086	475.108	1203.38	37.357
331	3.3	448.958	1251.1	8.54324	373.932	1224.14	-30.7525	515.518	1233.64	-43.0397	283.628	1062.27	-98.0124	601.793	1071.37	-141.629	461.796	1011.7	-17.327	206.702	716.609	-78.2865	160.879	739.811	194.479	235.331	754.264	200.454	207.145	755.566	277.189	206.268	731.576	376.288	670.69	808.749	80.1698	547.879	1051.81	108.823	592.705	1068.08	56.986	542.253	1142.31	68.6081	474.869	1203.43	37.529
332	3.31	448.776	1251.08	8.88219	373.792	1224.13	-30.6005	515.377	1233.66	-42.8185	283.55	1062.18	-97.9551	601.761	1071.49	-141.452	461.859	1011.62	-17.5888	206.861	716.456	-78.2545	160.86	739.791	194.461	235.305	754.254	200.434	207.106	755.579	277.163	206.2	731.587	376.28	670.849	808.989	80.431	548.336	1051.71	108.648	592.819	1068.31	57.4142	542.351	1142.58	69.1023	474.686	1203.37	37.6894
333	3.32	448.662	1251.03	9.0346	373.698	1224.11	-30.473	515.291	1233.7	-42.6399	283.517	1062.1	-97.9625	601.8	1071.57	-141.251	461.642	1011.71	-16.8498	207.04	716.338	-78.2352	160.867	739.781	194.405	235.311	754.248	200.347	207.125	755.585	277.116	206.194	731.597	376.217	671.116	809.159	80.6567	548.29	1052.33	110.216	593.049	1068.49	57.8516	542.574	1142.78	69.5931	474.65	1203.23	37.7876
334	3.33	448.597	1250.95	9.16561	373.659	1224.03	-30.3111	515.245	1233.68	-42.417	283.542	1061.98	-97.9343	601.882	1071.63	-141.029	461.607	1011.68	-16.5983	207.201	716.21	-78.1651	160.913	739.776	194.37	235.387	754.223	200.361	207.171	755.596	277.109	206.261	731.6	376.227	671.525	809.262	80.8132	548.652	1052.44	110.913	593.364	1068.57	58.3131	542.939	1142.89	70.1976	474.777	1203.05	37.907
335	3.34	448.567	1250.88	9.53948	373.64	1223.9	-30.08	515.232	1233.63	-42.1969	283.587	1061.84	-97.9194	601.989	1071.65	-140.769	461.615	1011.59	-16.4724	207.349	716.088	-78.1323	160.973	739.772	194.408	235.47	754.198	200.436	207.226	755.579	277.141	206.335	731.591	376.268	672.099	809.281	80.8923	549.21	1052.35	111.458	593.717	1068.52	58.7868	543.364	1142.89	70.8359	474.946	1202.81	38.1226
336	3.35	448.517	1250.69	9.71027	373.609	1223.78	-29.8882	515.214	1233.56	-41.9438	283.619	1061.72	-97.9701	602.128	1071.66	-140.538	461.597	1011.51	-16.3994	207.498	715.958	-78.1155	161.01	739.759	194.404	235.529	754.177	200.462	207.27	755.563	277.155	206.376	731.588	376.269	672.786	809.234	80.8836	549.849	1052.15	111.954	594.147	1068.39	59.1876	543.816	1142.81	71.4267	475.091	1202.45	38.3844
337	3.36	448.396	1250.48	9.79598	373.534	1223.64	-29.6885	515.186	1233.5	-41.6311	283.637	1061.63	-98.0483	602.249	1071.69	-140.309	461.532	1011.47	-16.2896	207.656	715.826	-78.0917	161.021	739.753	194.366	235.516	754.193	200.396	207.265	755.591	277.115	206.361	731.604	376.246	673.549	809.166	80.6878	550.487	1051.92	112.437	594.656	1068.26	59.4848	544.287	1142.69	72.003	475.249	1202.05	38.8314
338	3.37	448.286	1250.32	10.2068	373.44	1223.54	-29.3899	515.131	1233.42	-41.2683	283.619	1061.55	-98.101	602.319	1071.72	-140.145	461.441	1011.48	-16.0073	207.774	715.706	-78.0666	160.99	739.753	194.334	235.451	754.216	200.355	207.212	755.633	277.099	206.295	731.631	376.199	674.402	809.045	80.3887	551.16	1051.69	113.146	595.236	1068.13	59.8586	544.806	1142.52	72.7504	475.398	1201.65	39.5134
339	3.38	448.176	1250.18	10.6994	373.364	1223.4	-29.0931	515.091	1233.3	-40.8965	283.579	1061.49	-98.126	602.36	1071.73	-140.002	461.351	1011.44	-15.7066	207.825	715.608	-78.0694	160.945	739.749	194.334	235.415	754.247	200.381	207.153	755.67	277.138	206.226	731.67	376.22	675.421	808.873	80.014	552.021	1051.33	113.934	595.883	1067.97	60.3017	545.424	1142.27	73.5948	475.548	1201.19	40.4634
340	3.39	448.118	1249.89	11.0747	373.324	1223.23	-28.8469	515.109	1233.14	-40.3979	283.555	1061.43	-98.1641	602.411	1071.74	-139.878	461.281	1011.29	-15.5903	207.865	715.526	-78.0376	160.924	739.739	194.327	235.383	754.244	200.356	207.12	755.664	277.14	206.196	731.667	376.205	676.613	808.649	79.563	553.161	1050.79	114.571	596.677	1067.72	60.7687	546.193	1141.89	74.6223	475.759	1200.5	41.6268
341	3.4	448.123	1249.49	11.3203	373.323	1223.01	-28.6659	515.203	1232.98	-39.8291	283.561	1061.37	-98.2484	602.485	1071.74	-139.77	461.282	1011.06	-15.6545	207.899	715.481	-78.0157	160.919	739.707	194.264	235.382	754.227	200.313	207.133	755.63	277.078	206.186	731.642	376.145	678.083	808.312	78.9485	554.632	1050.09	115.352	597.726	1067.41	61.3293	547.176	1141.42	75.8953	476.106	1199.72	43.3238
342	3.41	448.102	1249.07	11.4947	373.325	1222.78	-28.5024	514.973	1232.9	-40.0833	283.564	1061.33	-98.3121	602.548	1071.76	-139.692	461.314	1010.78	-15.7503	207.899	715.486	-78.0312	160.91	739.679	194.225	235.405	754.217	200.319	207.144	755.596	277.024	206.219	731.614	376.089	679.7	807.845	78.1139	556.511	1049.23	116.326	598.975	1067	62.1105	548.352	1140.88	77.433	476.549	1199.14	46.1059
343	3.42	448.017	1248.66	11.6818	373.199	1222.49	-28.1254	514.269	1232.89	-41.5679	283.546	1061.3	-98.3208	602.568	1071.79	-139.624	461.303	1010.48	-15.8019	207.88	715.5	-78.0426	160.914	739.68	194.27	235.417	754.214	200.326	207.188	755.58	277.053	206.271	731.591	376.087	681.442	807.218	77.0717	558.732	1048.29	117.869	600.349	1066.53	63.0742	549.758	1140.2	79.6194	476.392	1198.58	52.0999
344	3.43	447.931	1248.27	12.0514	372.908	1222.16	-27.5804	514.051	1232.74	-41.6929	283.5	1061.31	-98.333	602.501	1071.9	-139.764	461.224	1010.2	-15.8203	207.882	715.492	-78.0295	160.929	739.688	194.328	235.416	754.227	200.345	207.219	755.595	277.115	206.292	731.593	376.096	683.309	806.474	75.7915	561.273	1047.18	119.879	601.895	1065.99	64.3674	551.446	1139.38	82.4614	475.865	1197.63	60.8926
345	3.44	447.823	1247.94	12.4306	372.821	1222.01	-27.5423	513.887	1232.57	-41.5482	283.405	1061.32	-98.383	602.371	1072.1	-140.186	461.105	1009.92	-15.8877	207.876	715.468	-78.0106	160.917	739.702	194.323	235.377	754.269	200.323	207.212	755.63	277.092	206.275	731.614	376.04	685.396	805.586	74.1267	564.219	1045.86	122.374	603.539	1065.31	65.9738	553.464	1138.32	86.0387	478.277	1197.37	66.7205
346	3.45	447.7	1247.6	12.8087	372.89	1221.99	-27.7643	513.69	1232.39	-41.2887	283.271	1061.31	-98.4644	602.06	1072.35	-140.555	460.992	1009.7	-15.8986	207.875	715.406	-78.0228	160.897	739.7	194.299	235.338	754.313	200.268	207.185	755.673	277.036	206.276	731.637	375.995	687.622	804.53	72.1149	567.651	1044.33	125.381	605.319	1064.44	67.9996	555.838	1137.17	90.3326	482.482	1197.65	72.693
347	3.46	447.553	1247.2	13.0729	372.806	1221.89	-27.7227	513.559	1232.17	-40.9987	283.126	1061.27	-98.5415	601.422	1072.66	-141.166	460.891	1009.53	-15.8289	207.876	715.305	-78.0212	160.882	739.683	194.306	235.297	754.364	200.223	207.175	755.691	277.029	206.292	731.669	375.98	689.948	803.324	69.8716	571.602	1042.58	129.023	607.223	1063.37	70.4802	558.609	1135.9	95.3001	485.087	1196.88	81.0258
348	3.47	447.446	1246.78	13.3552	372.711	1221.72	-27.6644	513.431	1231.9	-40.8073	282.967	1061.19	-98.6376	601.446	1072.57	-141.24	460.785	1009.29	-15.8852	207.869	715.144	-77.9829	160.854	739.672	194.284	235.275	754.407	200.17	207.179	755.685	277.017	206.315	731.673	375.942	692.372	801.963	67.3053	576.112	1040.54	133.364	609.213	1062.07	73.3688	561.94	1134.19	101.096	487.981	1195.76	91.0938
349	3.48	447.314	1246.38	13.4289	372.58	1221.5	-27.6742	513.335	1231.64	-40.7854	282.782	1061.07	-98.7734	601.673	1072.3	-141.08	460.688	1009.03	-16.1262	207.851	714.98	-77.9454	160.806	739.664	194.255	235.235	754.428	200.083	207.18	755.674	276.958	206.307	731.651	375.832	694.771	800.528	64.1881	581.252	1038.12	138.183	611.256	1060.45	76.6491	565.776	1132.06	107.63	492.098	1194.78	103.543
350	3.49	447.091	1245.95	13.2928	372.38	1221.24	-27.679	513.249	1231.4	-40.746	282.548	1060.96	-98.9002	602.075	1071.92	-140.763	460.579	1008.82	-16.2227	207.822	714.798	-77.8978	160.746	739.648	194.266	235.18	754.449	200.039	207.177	755.665	276.905	206.296	731.637	375.756	697.327	799.095	60.3986	586.943	1035.38	143.564	613.247	1058.48	80.3987	569.995	1129.56	114.868	497.654	1193.74	118.027
351	3.5	446.871	1245.57	13.4642	372.158	1220.99	-27.5865	513.052	1231.2	-40.6834	282.278	1060.84	-98.974	602.278	1071.98	-140.939	460.394	1008.67	-15.8168	207.774	714.616	-77.8779	160.689	739.605	194.279	235.143	754.435	200.032	207.184	755.656	276.902	206.305	731.61	375.771	700.263	797.432	56.6317	593.156	1032.25	149.371	615.151	1056.21	84.5863	574.486	1126.72	122.629	503.989	1191.69	132.548
352	3.51	446.646	1245.16	13.5652	371.923	1220.74	-27.5406	512.811	1231.04	-40.6488	282.005	1060.74	-99.0176	602.069	1072.54	-141.815	460.497	1008.28	-16.2679	207.717	714.45	-77.8829	160.676	739.579	194.313	235.14	754.436	200.058	207.192	755.648	276.886	206.337	731.585	375.781	702.667	795.735	53.5951	599.936	1028.67	155.451	616.87	1053.49	89.1385	579.347	1123.34	130.902	511.138	1188.76	147.695
353	3.52	446.419	1244.84	13.5357	371.647	1220.52	-27.6102	512.558	1230.96	-40.6953	281.742	1060.66	-99.094	602.113	1072.56	-142.09	461.113	1007.56	-18.5611	207.662	714.294	-77.877	160.674	739.573	194.273	235.12	754.446	199.969	207.195	755.664	276.815	206.384	731.595	375.712	705.038	794.077	50.3521	607.154	1024.67	161.594	618.348	1050.32	94.1528	584.758	1118.9	140.074	519.011	1185	163.329
354	3.53	446.135	1244.62	13.5246	371.36	1220.36	-27.6936	512.287	1230.93	-40.7517	281.508	1060.57	-99.1335	602.009	1072.49	-142.353	461.262	1007.26	-19.3066	207.597	714.162	-77.9161	160.679	739.568	194.232	235.092	754.487	199.868	207.205	755.69	276.788	206.424	731.621	375.651	707.45	792.311	46.8755	614.694	1020.21	167.884	619.975	1046.81	99.6419	590.155	1114.26	149.305	527.485	1180.41	179.334
355	3.54	445.774	1244.42	13.6119	371.061	1220.22	-27.7513	511.969	1230.88	-40.7379	281.289	1060.47	-99.1101	601.645	1072.63	-142.864	461.28	1007.07	-19.4955	207.504	714.027	-77.9539	160.688	739.558	194.282	235.067	754.519	199.861	207.222	755.71	276.827	206.431	731.629	375.641	709.781	790.4	43.1726	623.241	1015.54	174.333	621.645	1042.88	105.73	595.568	1109.09	159.017	536.431	1174.9	195.375
356	3.55	445.367	1244.23	13.6577	370.704	1220.05	-27.7959	511.628	1230.83	-40.7807	281.078	1060.36	-99.0408	601.151	1072.81	-143.46	461.257	1006.96	-19.4585	207.39	713.87	-77.9832	160.668	739.548	194.356	235.033	754.55	199.857	207.212	755.733	276.845	206.417	731.635	375.65	711.918	788.661	39.0095	632.597	1010.75	181.008	623.517	1038.48	112.361	600.999	1103.05	169.08	545.735	1168.47	211.162
357	3.56	444.993	1244.02	13.4995	370.346	1219.86	-27.9184	511.278	1230.75	-40.8602	280.888	1060.22	-98.9318	601.485	1072.44	-143.189	461.249	1006.86	-19.5409	207.26	713.707	-77.9686	160.627	739.553	194.373	235.009	754.557	199.823	207.214	755.725	276.861	206.406	731.645	375.637	713.897	787.371	34.2418	640.141	1005.04	188.306	625.835	1033.62	119.562	606.471	1096.09	179.45	555.136	1160.92	226.854
358	3.57	444.669	1243.8	13.3184	370.046	1219.66	-28.0867	510.971	1230.63	-40.9167	280.738	1060.08	-98.7683	601.652	1072.43	-143.334	461.264	1006.72	-19.6501	207.112	713.52	-77.9498	160.627	739.561	194.388	235.035	754.559	199.808	207.256	755.737	276.871	206.442	731.642	375.656	716.364	786.058	29.9228	647.404	998.197	194.695	628.674	1028.36	127.123	612.503	1088.68	189.753	564.555	1152.2	242.561
359	3.58	444.447	1243.67	13.4468	369.777	1219.49	-28.174	510.67	1230.52	-40.9773	280.583	1059.96	-98.5872	601.749	1072.17	-143.215	461.299	1006.64	-19.6072	206.935	713.345	-77.9437	160.658	739.562	194.396	235.06	754.581	199.791	207.298	755.767	276.873	206.499	731.622	375.694	718.671	784.85	26.0559	654.859	990.064	199.486	632.018	1022.69	134.955	618.919	1080.62	200.155	574.441	1141.86	258.73
360	3.59	444.159	1243.56	13.5214	369.494	1219.36	-28.2532	510.368	1230.42	-40.9876	280.389	1059.86	-98.3911	601.768	1072.05	-143.214	461.322	1006.57	-19.5148	206.72	713.17	-77.9036	160.638	739.566	194.409	235.052	754.605	199.776	207.312	755.775	276.872	206.511	731.609	375.671	720.72	784.126	21.8241	662.479	982.026	204.888	635.793	1016.67	143.258	625.112	1072.01	211.585	583.903	1130.69	274.419
361	3.6	443.762	1243.33	13.3226	369.136	1219.24	-28.3805	510.057	1230.35	-40.9253	280.156	1059.77	-98.1645	601.737	1071.95	-143.229	461.051	1006.73	-18.7426	206.508	712.992	-77.8303	160.565	739.546	194.429	234.982	754.617	199.738	207.266	755.758	276.831	206.472	731.593	375.63	722.564	783.94	17.0466	670.208	973.568	210.33	640.002	1010.24	151.732	631.509	1062.68	222.976	593.118	1118.34	289.822
362	3.61	443.321	1243.14	13.3072	368.775	1219.14	-28.4444	509.735	1230.32	-40.8128	279.924	1059.72	-97.9328	601.693	1071.9	-143.207	460.437	1007.18	-16.9681	206.334	712.855	-77.8038	160.486	739.535	194.444	234.898	754.637	199.706	207.208	755.76	276.798	206.437	731.587	375.617	724.095	783.074	13.6589	677.488	964.777	215.649	644.538	1003.36	160.182	638.093	1052.74	234.095	602.021	1104.87	304.665
363	3.62	442.929	1243.02	13.5665	368.445	1219.04	-28.452	509.422	1230.31	-40.6675	279.74	1059.7	-97.7003	601.672	1071.88	-143.127	460.191	1007.2	-16.4433	206.188	712.747	-77.7899	160.443	739.528	194.456	234.831	754.66	199.648	207.177	755.772	276.805	206.422	731.584	375.595	725.511	782.065	10.761	684.624	955.737	220.698	649.269	996.089	168.458	644.768	1042.25	244.645	610.684	1090.33	318.792
364	3.63	442.544	1242.9	13.7325	368.127	1218.92	-28.4582	509.127	1230.28	-40.5001	279.59	1059.67	-97.4768	601.673	1071.88	-142.971	460.054	1007.14	-16.213	206.069	712.654	-77.7422	160.432	739.513	194.487	234.787	754.697	199.622	207.168	755.776	276.844	206.437	731.589	375.555	726.934	781.023	8.01213	691.841	946.57	225.509	653.938	988.41	176.18	651.335	1031.36	254.436	619.321	1074.96	332.168
365	3.64	442.136	1242.7	13.7378	367.806	1218.77	-28.4623	508.846	1230.26	-40.2982	279.459	1059.63	-97.3329	601.737	1071.88	-142.751	459.933	1007.05	-16.1162	206.003	712.607	-77.7276	160.433	739.509	194.511	234.775	754.718	199.594	207.186	755.792	276.832	206.486	731.612	375.565	728.353	780.066	5.07888	699.027	937.401	229.791	658.272	980.306	183.59	657.948	1019.79	263.866	628.271	1058.8	344.779
366	3.65	441.755	1242.5	13.8903	367.471	1218.62	-28.4446	508.555	1230.24	-40.025	279.372	1059.6	-97.2238	601.854	1071.9	-142.44	459.826	1006.96	-15.9833	205.996	712.546	-77.7198	160.43	739.522	194.514	234.775	754.723	199.591	207.208	755.826	276.793	206.53	731.634	375.56	729.741	779.17	2.03551	706.038	928.421	232.868	662.156	971.952	190.779	664.552	1007.73	272.654	637.572	1042.14	356.403
367	3.66	441.401	1242.35	14.2808	367.168	1218.51	-28.2987	508.237	1230.21	-39.6668	279.309	1059.54	-97.1094	602.008	1071.9	-141.971	459.709	1006.89	-15.7197	206.01	712.462	-77.7275	160.417	739.527	194.536	234.776	754.745	199.606	207.245	755.834	276.822	206.567	731.637	375.546	731.079	778.149	-0.93477	713.066	919.596	235.426	665.713	963.003	197.268	670.438	996.269	279.206	645.996	1025.94	365.894
368	3.67	441.012	1242.21	14.6373	366.871	1218.36	-28.0722	507.946	1230.17	-39.2206	279.253	1059.47	-96.9804	602.209	1071.88	-141.317	459.604	1006.83	-15.365	206.048	712.358	-77.7046	160.393	739.524	194.585	234.774	754.766	199.637	207.262	755.832	276.868	206.598	731.635	375.601	732.425	777.023	-3.8435	719.809	910.791	237.323	668.741	952.975	202.912	675.825	984.98	284.502	654.097	1010.08	373.671
369	3.68	440.61	1242.11	14.9821	366.575	1218.22	-27.8472	507.679	1230.15	-38.7705	279.222	1059.4	-96.8583	602.432	1071.87	-140.549	459.538	1006.75	-15.0596	206.101	712.229	-77.7039	160.344	739.507	194.559	234.755	754.781	199.591	207.252	755.836	276.835	206.593	731.627	375.563	733.827	775.775	-6.66949	725.708	901.93	238.415	672.084	943.323	207.607	681.548	973.044	289.75	662.474	994.609	380.055
370	3.69	440.219	1242.01	15.2158	366.288	1218.1	-27.623	507.415	1230.17	-38.3625	279.221	1059.32	-96.7651	602.677	1071.86	-139.748	459.471	1006.66	-14.7379	206.191	712.086	-77.7245	160.32	739.503	194.453	234.737	754.784	199.486	207.242	755.837	276.73	206.584	731.639	375.453	735.283	774.435	-9.63695	731.453	893.075	239.166	675.784	934.099	211.165	686.979	961.267	294.02	669.935	979.686	385.296
371	3.7	439.795	1241.95	15.6619	365.975	1217.97	-27.3884	507.131	1230.2	-37.8368	279.233	1059.21	-96.6112	602.979	1071.83	-138.876	459.412	1006.58	-14.168	206.304	711.944	-77.7977	160.318	739.48	194.424	234.72	754.776	199.42	207.243	755.82	276.672	206.591	731.628	375.392	736.793	772.944	-12.6019	736.887	884.345	239.315	679.577	924.89	214.104	692.209	949.663	297.472	676.77	965.175	389.25
372	3.71	439.312	1241.81	16.1679	365.684	1217.83	-27.0656	506.83	1230.23	-37.1469	279.283	1059.1	-96.3583	603.326	1071.79	-137.911	459.356	1006.45	-13.5004	206.423	711.809	-77.865	160.339	739.438	194.446	234.725	754.746	199.414	207.25	755.788	276.655	206.598	731.599	375.388	738.319	771.352	-15.5971	741.71	875.322	239.46	683.092	915.401	216.797	697.254	938.502	300.308	683.036	951.004	392.275
373	3.72	438.874	1241.66	16.6576	365.409	1217.67	-26.7662	506.557	1230.23	-36.3277	279.377	1059	-96.0698	603.753	1071.77	-136.871	459.3	1006.25	-12.9956	206.58	711.709	-77.9355	160.376	739.422	194.42	234.753	754.714	199.389	207.278	755.753	276.623	206.607	731.586	375.349	739.844	769.685	-18.7288	746.061	866.524	238.999	686.565	906.257	218.755	701.846	927.885	302.146	688.797	936.934	394.85
374	3.73	438.474	1241.53	17.2484	365.148	1217.48	-26.4265	506.334	1230.23	-35.457	279.512	1058.94	-95.7658	604.232	1071.73	-135.746	459.272	1006.07	-12.449	206.808	711.633	-78.0172	160.417	739.432	194.385	234.798	754.708	199.374	207.326	755.761	276.614	206.629	731.598	375.301	741.355	767.912	-22.047	749.922	858.027	237.915	689.883	897.66	219.783	705.793	917.29	303.078	694.215	922.906	397.126
375	3.74	438.063	1241.31	17.9759	364.91	1217.24	-25.9929	506.155	1230.22	-34.483	279.697	1058.89	-95.3949	604.768	1071.68	-134.495	459.266	1005.87	-11.9487	207.055	711.569	-78.0598	160.475	739.443	194.4	234.864	754.717	199.414	207.377	755.789	276.661	206.672	731.599	375.348	742.885	766.067	-25.5039	753.31	849.984	236.403	692.894	889.53	219.983	709.513	907.235	303.677	699.118	909.883	398.161
376	3.75	437.726	1241.09	18.8641	364.707	1216.98	-25.4517	506.013	1230.19	-33.5245	279.914	1058.86	-95.0262	605.357	1071.64	-133.257	459.325	1005.62	-11.5024	207.31	711.493	-78.0311	160.555	739.458	194.441	234.934	754.74	199.46	207.429	755.803	276.738	206.725	731.607	375.436	744.37	764.122	-29.05	756.351	842.558	234.354	695.369	881.672	219.495	712.598	897.696	303.352	703.236	897.62	398.091
377	3.76	437.448	1240.84	19.6645	364.55	1216.73	-24.8998	505.911	1230.12	-32.5543	280.051	1058.96	-94.2637	605.982	1071.6	-132.105	459.467	1005.37	-11.1497	207.563	711.397	-77.9671	160.608	739.487	194.399	235.006	754.769	199.475	207.466	755.827	276.711	206.76	731.631	375.434	745.714	762.045	-32.6638	759.046	835.768	231.746	697.248	873.991	218.313	714.993	888.711	302.18	706.698	886.14	397.357
378	3.77	437.167	1240.56	20.4674	364.442	1216.5	-24.2566	505.842	1230.05	-31.4777	280.087	1059.13	-93.126	606.604	1071.54	-131.018	459.632	1005.16	-10.7107	207.803	711.31	-77.9174	160.633	739.507	194.302	235.045	754.773	199.436	207.462	755.826	276.625	206.761	731.653	375.38	746.874	759.943	-36.2673	761.362	829.566	228.822	698.557	866.458	216.658	716.837	880.176	300.518	709.599	875.379	396.099
379	3.78	436.939	1240.35	21.5569	364.366	1216.27	-23.4715	505.775	1229.96	-30.284	280.28	1058.95	-93.0958	607.208	1071.42	-129.921	459.818	1005.01	-10.018	208.015	711.238	-77.84	160.645	739.532	194.273	235.037	754.792	199.411	207.444	755.828	276.613	206.756	731.654	375.383	747.782	757.846	-39.8874	763.235	823.82	225.749	699.406	859.178	214.763	718.264	872.057	298.689	712.106	865.292	394.55
380	3.79	436.776	1240.08	22.6692	364.368	1216.03	-22.6535	505.758	1229.86	-29.1399	280.614	1058.85	-93.2286	607.755	1071.27	-128.971	460.031	1004.87	-9.27777	208.212	711.199	-77.7863	160.644	739.538	194.264	235.024	754.808	199.414	207.431	755.83	276.636	206.753	731.663	375.399	748.459	755.888	-43.7391	764.701	818.33	222.579	700.02	852.185	212.635	719.518	863.919	296.911	714.343	855.742	392.715
381	3.8	436.702	1239.74	23.694	364.412	1215.76	-21.9484	505.805	1229.71	-28.1289	281.065	1058.96	-93.219	608.274	1071.09	-128.162	460.25	1004.68	-8.78898	208.397	711.202	-77.7818	160.638	739.535	194.226	235.027	754.801	199.377	207.415	755.814	276.591	206.765	731.658	375.391	748.97	754.139	-47.5437	765.81	813.003	219.33	700.576	845.509	210.268	720.785	855.533	295.252	716.381	846.646	390.607
382	3.81	436.679	1239.27	24.3871	364.48	1215.42	-21.3281	505.927	1229.51	-27.0504	281.403	1059.02	-92.8367	608.824	1070.87	-127.399	460.507	1004.4	-8.53364	208.563	711.236	-77.7769	160.668	739.531	194.224	235.068	754.748	199.327	207.44	755.767	276.546	206.8	731.624	375.357	749.314	752.471	-51.1658	766.625	807.734	216.24	700.92	839.27	207.882	721.649	847.822	293.246	718.299	837.877	388.409
383	3.82	436.805	1238.81	25.2991	364.654	1215.09	-20.5339	506.136	1229.26	-25.8945	281.716	1059.08	-92.3462	609.366	1070.66	-126.785	460.834	1004.08	-8.20908	208.714	711.315	-77.8243	160.746	739.541	194.236	235.144	754.714	199.332	207.514	755.744	276.557	206.919	731.609	375.392	749.565	751.135	-54.9068	767.183	802.447	213.306	701.136	833.366	205.645	722.35	840.446	291.176	719.98	829.263	386.325
384	3.83	437.053	1238.39	26.3501	364.966	1214.78	-19.5903	506.426	1228.97	-24.8589	282.053	1059.17	-91.7979	609.89	1070.45	-126.301	461.23	1003.77	-7.71664	208.841	711.445	-77.891	160.823	739.559	194.261	235.247	754.726	199.39	207.62	755.733	276.623	207.07	731.607	375.47	749.826	750.068	-58.8998	767.531	797.266	210.415	701.206	827.712	203.509	722.902	833.293	289.176	721.473	820.83	384.21
385	3.84	437.35	1237.96	27.1286	365.308	1214.5	-18.7709	506.803	1228.66	-23.928	282.389	1059.28	-91.2785	610.385	1070.22	-125.939	461.618	1003.48	-7.29362	208.952	711.579	-77.9035	160.875	739.584	194.259	235.331	754.738	199.403	207.724	755.73	276.633	207.173	731.599	375.5	750.032	749.112	-62.6895	767.793	792.228	207.716	701.238	822.233	201.458	723.334	826.328	287.175	722.893	812.66	381.997
386	3.85	437.698	1237.52	27.9085	365.64	1214.28	-18.0946	507.214	1228.36	-23.0543	282.706	1059.39	-90.8082	610.872	1069.95	-125.545	461.89	1003.21	-6.98822	209.037	711.708	-77.9436	160.899	739.595	194.241	235.38	754.754	199.375	207.784	755.739	276.615	207.213	731.609	375.494	749.987	747.632	-65.3321	767.945	787.283	205.15	701.159	816.839	199.457	723.602	819.551	285.213	724.163	804.83	379.674
387	3.86	438.079	1237.12	28.757	365.989	1214.09	-17.3741	507.603	1228.11	-22.1943	282.978	1059.52	-90.402	611.333	1069.62	-125.11	462.107	1003	-6.65944	209.055	711.855	-78.0174	160.918	739.602	194.218	235.383	754.771	199.337	207.788	755.749	276.572	207.199	731.64	375.48	749.803	746.032	-68.047	767.98	782.472	202.606	700.927	811.514	197.525	723.728	813.03	283.384	725.182	797.344	377.537
388	3.87	438.494	1236.78	29.7125	366.415	1213.91	-16.5339	507.989	1227.83	-21.4096	283.264	1059.62	-89.9855	611.78	1069.24	-124.696	462.31	1002.8	-6.32836	209.043	711.955	-78.0593	160.93	739.581	194.239	235.351	754.772	199.339	207.767	755.76	276.554	207.173	731.642	375.481	749.534	744.575	-70.5303	767.954	777.783	200.357	700.652	806.19	195.777	723.768	806.788	281.471	725.913	790.285	375.627
389	3.88	438.906	1236.43	30.519	366.843	1213.75	-15.7783	508.409	1227.53	-20.715	283.583	1059.69	-89.5158	612.237	1068.85	-124.379	462.533	1002.59	-5.98486	209.025	712.015	-78.0461	160.907	739.563	194.238	235.31	754.773	199.342	207.719	755.757	276.539	207.158	731.657	375.502	749.192	743.167	-72.8529	767.954	773.134	198.185	700.372	800.79	194.173	723.795	800.779	279.632	726.415	783.565	373.707
390	3.89	439.351	1236.07	31.218	367.201	1213.52	-15.27	508.83	1227.22	-20.1171	283.903	1059.76	-89.0597	612.703	1068.42	-124.156	462.805	1002.34	-5.63372	208.954	712.115	-78.0815	160.874	739.569	194.203	235.285	754.752	199.297	207.693	755.736	276.477	207.134	731.658	375.451	748.762	741.812	-75.0617	767.944	768.542	196.13	700.06	795.436	192.62	723.702	794.964	277.748	726.735	777.19	371.791
391	3.9	439.84	1235.7	31.8747	367.633	1213.27	-14.7492	509.286	1226.9	-19.4989	284.205	1059.82	-88.6368	613.197	1067.92	-123.92	463.166	1002.03	-5.33289	208.839	712.218	-78.1082	160.849	739.577	194.193	235.289	754.716	199.274	207.722	755.693	276.458	207.155	731.64	375.426	748.24	740.475	-77.1312	767.891	763.991	194.285	699.76	790.199	191.173	723.556	789.268	276.114	726.902	771.114	370.021
392	3.91	440.333	1235.34	32.4213	368.131	1213.03	-14.1402	509.786	1226.58	-18.8876	284.513	1059.88	-88.227	613.701	1067.39	-123.673	463.62	1001.69	-5.04035	208.752	712.359	-78.1477	160.865	739.596	194.271	235.365	754.679	199.351	207.802	755.67	276.522	207.234	731.61	375.494	747.637	739.195	-79.1125	767.862	759.569	192.64	699.535	785.149	189.914	723.476	783.762	274.675	726.94	765.23	368.535
393	3.92	440.8	1234.93	32.8686	368.608	1212.82	-13.5677	510.253	1226.29	-18.3697	284.829	1059.95	-87.846	614.201	1066.87	-123.416	464.018	1001.35	-4.96601	208.657	712.534	-78.2138	160.904	739.639	194.336	235.437	754.656	199.396	207.879	755.668	276.558	207.317	731.594	375.519	746.946	737.953	-80.958	767.813	755.265	191.072	699.344	780.31	188.832	723.412	778.454	273.206	726.835	759.484	367.128
394	3.93	441.16	1234.53	33.1005	368.996	1212.65	-13.187	510.671	1226.02	-17.9123	285.113	1060.04	-87.4883	614.68	1066.38	-123.175	464.332	1001.06	-4.99323	208.546	712.724	-78.3158	160.909	739.689	194.315	235.46	754.677	199.365	207.917	755.675	276.564	207.347	731.596	375.49	746.171	736.731	-82.6393	767.725	751.152	189.681	699.142	775.766	187.811	723.309	773.361	271.931	726.646	753.764	365.883
395	3.94	441.533	1234.31	33.5827	369.354	1212.5	-12.8531	511.071	1225.78	-17.4526	285.392	1060.15	-87.0896	615.184	1065.87	-122.911	464.588	1000.87	-4.89901	208.447	712.897	-78.3766	160.913	739.726	194.306	235.436	754.688	199.352	207.917	755.71	276.511	207.417	731.622	375.493	745.344	735.463	-83.9779	767.596	747.28	188.484	698.897	771.529	186.925	723.091	768.484	270.914	726.398	747.971	364.647
396	3.95	441.954	1234.13	34.2921	369.765	1212.39	-12.3596	511.472	1225.57	-16.8951	285.648	1060.26	-86.6891	615.687	1065.34	-122.609	464.837	1000.72	-4.60575	208.356	713.049	-78.3989	160.9	739.726	194.324	235.39	754.699	199.348	207.91	755.723	276.527	207.534	731.661	375.566	744.424	734.14	-84.933	767.549	743.522	188.825	698.543	767.76	186.192	722.874	763.98	270.381	725.727	741.859	363.106
397	3.96	442.33	1233.92	34.8207	370.215	1212.31	-11.8299	511.903	1225.4	-16.347	285.906	1060.38	-86.3616	616.185	1064.79	-122.289	465.082	1000.61	-4.2151	208.257	713.18	-78.3684	160.877	739.699	194.335	235.329	754.696	199.293	207.87	755.718	276.503	207.634	731.686	375.608	743.514	732.908	-85.7915	767.228	740.696	189.624	697.961	765.086	185.562	722.725	760.881	270.655	724.534	736.142	361.692
398	3.97	442.755	1233.72	35.2752	370.615	1212.21	-11.4683	512.376	1225.21	-15.859	286.176	1060.49	-86.0852	616.731	1064.25	-122.007	465.32	1000.46	-3.9998	208.2	713.284	-78.3409	160.841	739.657	194.268	235.278	754.678	199.198	207.827	755.682	276.39	207.652	731.688	375.513	742.661	731.691	-86.4592	765.948	740.234	186.686	697.124	764.086	184.966	722.354	760.179	270.789	723.621	733.173	362.369
399	3.98	443.246	1233.48	35.7124	371.028	1212.09	-11.2121	512.862	1224.99	-15.4799	286.503	1060.59	-85.8416	617.347	1063.73	-121.696	465.579	1000.27	-3.82183	208.177	713.389	-78.3595	160.817	739.649	194.216	235.271	754.667	199.123	207.821	755.695	276.293	207.673	731.692	375.434	741.781	730.344	-86.6702	765.14	740.838	185.831	696.211	764.052	184.398	721.582	760.911	270.257	722.693	732.719	362.467
400	3.99	443.79	1233.23	36.1602	371.526	1211.98	-10.9493	513.359	1224.79	-15.1351	286.872	1060.7	-85.5884	617.958	1063.28	-121.477	465.956	1000.06	-3.60832	208.212	713.506	-78.3761	160.824	739.641	194.204	235.299	754.658	199.131	207.869	755.684	276.279	207.849	731.646	375.5	740.91	729.103	-86.6752	764.693	741.425	186.856	695.329	764.297	184.047	720.642	761.809	269.932	721.617	734.31	361.892
401	4	444.271	1232.94	36.256	372.079	1211.89	-10.6273	513.873	1224.61	-14.8295	287.227	1060.82	-85.3825	618.404	1062.97	-121.396	466.385	999.789	-3.71577	208.243	713.653	-78.3903	160.867	739.592	194.246	235.343	754.634	199.18	207.955	755.633	276.349	208.111	731.579	375.613	740.107	727.97	-86.3009	764.374	741.427	189.667	694.508	764.749	184	719.239	762.301	269.572	720.148	735.771	360.539
402	4.01	444.78	1232.78	36.4461	372.612	1211.86	-10.3529	514.405	1224.43	-14.5234	287.528	1060.92	-85.2506	618.69	1062.77	-121.387	466.742	999.605	-3.88378	208.269	713.788	-78.3206	160.906	739.618	194.325	235.365	754.658	199.2	208.015	755.686	276.419	208.254	731.558	375.672	739.521	727.228	-85.9922	763.55	741.447	190.468	693.729	765.222	184.126	718.138	762.902	269.555	718.977	736.774	360.436
403	4.02	445.307	1232.71	36.8193	373.103	1211.88	-10.1038	514.89	1224.27	-14.2167	287.77	1061	-85.1658	618.923	1062.63	-121.35	466.987	999.541	-3.9085	208.296	713.88	-78.2254	160.931	739.736	194.431	235.399	754.739	199.31	208.011	755.77	276.49	208.278	731.588	375.747	739.028	726.774	-85.7167	762.558	741.474	190.978	692.889	765.704	184.424	716.989	763.367	269.786	717.743	736.946	360.702
404	4.03	445.804	1232.69	37.2395	373.543	1211.96	-9.81759	515.317	1224.14	-13.9888	287.956	1061.09	-85.1224	619.149	1062.54	-121.266	467.162	999.591	-3.78577	208.319	713.94	-78.1391	160.952	739.814	194.51	235.428	754.808	199.483	207.988	755.796	276.588	208.288	731.611	375.851	738.553	726.429	-85.1476	761.417	741.626	191.579	691.902	766.191	184.846	715.686	763.598	270.368	716.281	736.29	361.171
405	4.04	446.258	1232.66	37.4623	373.944	1212.08	-9.64929	515.714	1224.03	-13.8379	288.111	1061.14	-85.0815	619.36	1062.48	-121.158	467.292	999.655	-3.6387	208.363	713.968	-78.0939	160.957	739.792	194.464	235.415	754.818	199.479	207.973	755.78	276.553	208.26	731.644	375.821	738.135	726.209	-84.4576	760.039	742.062	191.154	690.851	766.59	185.359	714.485	763.722	271.235	714.83	735.233	362.375
406	4.05	446.667	1232.58	37.5161	374.316	1212.16	-9.5804	516.094	1223.94	-13.7218	288.264	1061.16	-85.0829	619.589	1062.42	-120.996	467.384	999.638	-3.59227	208.466	713.984	-78.1743	160.968	739.75	194.349	235.399	754.782	199.305	207.961	755.781	276.434	208.21	731.681	375.707	737.823	726.068	-83.7082	758.414	742.728	189.291	689.747	766.751	185.998	713.463	763.668	271.983	713.524	733.813	364.16
407	4.06	447.054	1232.5	37.4743	374.679	1212.2	-9.49521	516.465	1223.86	-13.6587	288.438	1061.15	-85.0993	619.843	1062.34	-120.78	467.478	999.588	-3.55951	208.63	714.038	-78.3078	160.963	739.706	194.194	235.403	754.732	199.134	207.953	755.77	276.307	208.19	731.672	375.62	737.584	725.894	-82.722	757.094	742.905	189.537	688.654	766.697	186.752	711.81	762.895	272.735	711.676	731.904	364.993
408	4.07	447.46	1232.47	37.549	375.029	1212.21	-9.42197	516.815	1223.78	-13.6322	288.61	1061.11	-85.1054	620.131	1062.25	-120.484	467.57	999.526	-3.47943	208.836	714.055	-78.382	160.962	739.635	194.122	235.416	754.68	199.102	207.967	755.709	276.267	208.208	731.637	375.579	737.473	725.708	-81.72	755.851	742.897	190.287	687.315	766.319	187.489	709.941	762.076	273.698	709.988	731.174	365.624
409	4.08	447.809	1232.43	37.6416	375.312	1212.21	-9.37575	517.13	1223.7	-13.5974	288.767	1061.05	-85.1758	620.415	1062.11	-120.123	467.635	999.437	-3.45952	209.052	714.018	-78.3616	160.992	739.61	194.16	235.457	754.645	199.154	207.986	755.691	276.296	208.222	731.619	375.598	737.541	725.588	-80.8353	754.736	742.916	191.193	685.63	765.45	187.916	708.366	761.508	274.484	708.609	730.998	366.452
410	4.09	448.039	1232.39	37.6627	375.505	1212.2	-9.35944	517.353	1223.65	-13.5355	288.895	1060.98	-85.2881	620.665	1061.98	-119.78	467.636	999.37	-3.45647	209.274	713.943	-78.3315	160.993	739.652	194.159	235.502	754.648	199.207	207.991	755.698	276.287	208.202	731.6	375.598	737.735	725.472	-79.9828	753.779	743.152	192.112	684.254	764.56	188.465	707.087	761.216	275.198	707.337	730.958	367.313
411	4.1	448.136	1232.36	37.6608	375.619	1212.19	-9.31728	517.463	1223.64	-13.4539	288.992	1060.94	-85.4354	620.877	1061.87	-119.488	467.609	999.359	-3.36546	209.524	713.866	-78.3137	161.004	739.682	194.143	235.505	754.645	199.233	207.964	755.693	276.288	208.153	731.595	375.598	737.905	725.353	-79.1064	753.063	743.396	192.965	683.293	764.219	189.116	706.109	761.171	275.911	706.219	730.956	368.082
412	4.11	448.164	1232.39	37.8794	375.673	1212.2	-9.21739	517.498	1223.64	-13.3299	289.069	1060.92	-85.5634	621.07	1061.77	-119.17	467.555	999.386	-3.15951	209.753	713.785	-78.2846	161.023	739.71	194.173	235.509	754.678	199.293	207.941	755.761	276.358	208.089	731.654	375.619	737.971	725.208	-78.2343	752.404	743.428	193.768	682.596	764.329	189.977	705.356	761.242	276.631	705.288	730.988	368.924
413	4.12	448.152	1232.4	38.1555	375.679	1212.18	-9.11067	517.501	1223.62	-13.1957	289.129	1060.86	-85.675	621.25	1061.67	-118.84	467.511	999.407	-2.90928	209.959	713.671	-78.2189	161.023	739.732	194.197	235.501	754.735	199.301	207.911	755.809	276.37	208.034	731.695	375.638	737.943	725.038	-77.4493	751.779	743.293	194.582	682.089	764.604	190.899	704.712	761.23	277.448	704.546	731.005	369.637
414	4.13	448.073	1232.32	38.2028	375.653	1212.11	-9.08143	517.486	1223.59	-13.0443	289.191	1060.77	-85.8331	621.437	1061.58	-118.528	467.47	999.366	-2.88974	210.107	713.56	-78.1952	161.02	739.717	194.131	235.499	754.754	199.25	207.9	755.79	276.306	208.013	731.694	375.587	737.835	724.883	-76.708	751.271	743.121	195.365	681.73	764.802	191.73	704.137	761.115	278.231	703.864	731.008	370.366
415	4.14	447.971	1232.19	38.1912	375.615	1212.02	-9.13363	517.461	1223.54	-12.9038	289.253	1060.67	-86.0769	621.635	1061.5	-118.183	467.45	999.248	-2.97136	210.212	713.485	-78.2554	161.05	739.651	194.021	235.514	754.701	199.128	207.933	755.751	276.199	208.041	731.685	375.507	737.645	724.711	-75.8814	750.877	742.986	196.144	681.424	764.832	192.453	703.629	760.941	278.947	703.221	731.015	371.106
416	4.15	447.863	1232.04	38.1701	375.581	1211.9	-9.1397	517.446	1223.47	-12.7215	289.318	1060.54	-86.2705	621.83	1061.39	-117.75	467.461	999.114	-2.93651	210.296	713.414	-78.3089	161.093	739.603	193.954	235.548	754.638	199.082	207.989	755.716	276.136	208.089	731.648	375.471	737.468	724.553	-75.0413	750.565	742.921	196.905	681.113	764.731	193.139	703.158	760.739	279.654	702.67	730.997	371.76
417	4.16	447.739	1231.87	38.1961	375.539	1211.77	-9.11101	517.42	1223.38	-12.4641	289.361	1060.4	-86.4299	622.001	1061.3	-117.321	467.453	998.99	-2.86393	210.384	713.255	-78.2484	161.119	739.551	193.914	235.594	754.585	199.078	208.049	755.675	276.151	208.134	731.593	375.462	737.428	724.446	-74.2302	750.299	742.887	197.642	680.787	764.556	193.726	702.692	760.506	280.384	702.158	730.978	372.381
418	4.17	447.55	1231.72	38.0912	375.447	1211.69	-9.12244	517.387	1223.34	-12.242	289.368	1060.28	-86.6087	622.132	1061.25	-116.986	467.385	998.873	-2.96266	210.489	713.074	-78.1802	161.114	739.499	193.878	235.608	754.569	199.052	208.035	755.669	276.085	208.161	731.591	375.453	737.52	724.419	-73.57	750.057	742.93	198.252	680.418	764.339	194.211	702.256	760.295	280.97	701.64	731.02	372.942
419	4.18	447.383	1231.69	38.2687	375.316	1211.65	-9.09966	517.313	1223.33	-12.0345	289.341	1060.19	-86.768	622.202	1061.24	-116.749	467.28	998.813	-2.96644	210.625	712.916	-78.1522	161.107	739.501	193.864	235.588	754.591	199.049	207.984	755.728	276.048	208.113	731.626	375.455	737.734	724.478	-73.0893	749.801	743.013	198.771	680.06	764.156	194.643	701.892	760.164	281.397	701.128	731.101	373.448
420	4.19	447.19	1231.65	38.6307	375.168	1211.62	-9.02099	517.206	1223.29	-11.7968	289.287	1060.11	-86.8337	622.231	1061.25	-116.467	467.164	998.831	-2.76081	210.765	712.765	-78.1298	161.1	739.521	193.879	235.568	754.602	199.114	207.929	755.777	276.105	208.044	731.657	375.477	738.066	724.618	-72.7402	749.572	743.081	199.246	679.785	764.04	195.109	701.579	760.074	281.82	700.7	731.14	373.887
421	4.2	446.987	1231.59	38.8373	375.04	1211.6	-8.94583	517.112	1223.23	-11.5577	289.23	1060.03	-86.8452	622.229	1061.27	-116.217	467.066	998.859	-2.55739	210.871	712.613	-78.1048	161.094	739.508	193.893	235.545	754.615	199.148	207.894	755.786	276.164	208.002	731.682	375.48	738.477	724.874	-72.5502	749.427	743.098	199.614	679.617	763.962	195.45	701.335	759.989	282.213	700.399	731.135	374.192
422	4.21	446.893	1231.57	38.8965	374.958	1211.59	-8.92149	517.039	1223.19	-11.4324	289.174	1059.95	-86.8892	622.212	1061.32	-116.078	467.005	998.852	-2.57936	210.938	712.465	-78.1197	161.071	739.503	193.853	235.537	754.63	199.096	207.887	755.804	276.139	207.982	731.699	375.418	738.896	725.101	-72.3962	749.382	743.09	199.753	679.567	763.915	195.574	701.195	759.933	282.37	700.228	731.144	374.305
423	4.22	446.851	1231.52	39.0016	374.904	1211.57	-8.88276	516.979	1223.14	-11.381	289.127	1059.86	-86.9227	622.188	1061.38	-115.975	466.993	998.821	-2.603	210.972	712.369	-78.1799	161.052	739.518	193.786	235.535	754.64	199.019	207.902	755.813	276.077	208.005	731.713	375.388	739.234	725.27	-72.2491	749.424	743.058	199.78	679.618	763.887	195.666	701.167	759.884	282.436	700.166	731.156	374.34
424	4.23	446.764	1231.43	39.0822	374.85	1211.52	-8.77854	516.889	1223.07	-11.24	289.052	1059.76	-86.8739	622.129	1061.42	-115.852	466.958	998.778	-2.5372	210.955	712.279	-78.193	161.061	739.497	193.766	235.542	754.6	199.025	207.925	755.78	276.092	208.046	731.686	375.423	739.493	725.442	-72.1886	749.551	742.943	199.778	679.72	763.838	195.735	701.246	759.822	282.489	700.147	731.15	374.386
425	4.24	446.694	1231.38	39.2073	374.764	1211.45	-8.69627	516.787	1223.02	-11.1073	288.945	1059.65	-86.8217	622.04	1061.46	-115.771	466.866	998.711	-2.53726	210.911	712.193	-78.1984	161.062	739.471	193.772	235.554	754.563	199.032	207.944	755.748	276.086	208.079	731.657	375.447	739.681	725.621	-72.2272	749.738	742.729	199.696	679.917	763.777	195.742	701.426	759.748	282.457	700.157	731.145	374.42
426	4.25	446.6	1231.29	39.2959	374.66	1211.41	-8.64648	516.71	1223	-11.0208	288.842	1059.54	-86.7829	621.929	1061.5	-115.724	466.741	998.604	-2.66821	210.865	712.107	-78.1954	161.045	739.472	193.768	235.54	754.563	198.988	207.946	755.728	276.063	208.087	731.637	375.435	739.806	725.76	-72.3335	749.993	742.43	199.526	680.195	763.708	195.65	701.688	759.67	282.323	700.179	731.151	374.374
427	4.26	446.481	1231.18	39.4013	374.56	1211.37	-8.56725	516.622	1222.98	-10.9132	288.735	1059.44	-86.7501	621.816	1061.52	-115.691	466.624	998.516	-2.72225	210.823	712.017	-78.2019	161.045	739.449	193.783	235.538	754.548	198.982	207.951	755.719	276.063	208.077	731.629	375.419	739.85	725.869	-72.5176	750.275	742.128	199.373	680.517	763.708	195.56	701.988	759.588	282.254	700.207	731.133	374.326
428	4.27	446.371	1231.08	39.5527	374.489	1211.32	-8.38344	516.517	1222.95	-10.7695	288.613	1059.33	-86.703	621.724	1061.51	-115.639	466.541	998.499	-2.61659	210.779	711.93	-78.1994	161.061	739.412	193.785	235.55	754.526	198.99	207.966	755.724	276.079	208.08	731.631	375.432	739.785	725.922	-72.6998	750.524	741.872	199.257	680.861	763.735	195.495	702.265	759.544	282.221	700.237	731.133	374.312
429	4.28	446.275	1231.07	39.6514	374.413	1211.28	-8.24223	516.421	1222.93	-10.679	288.5	1059.25	-86.6421	621.646	1061.53	-115.628	466.474	998.487	-2.57808	210.716	711.834	-78.203	161.065	739.4	193.777	235.541	754.543	198.939	207.968	755.753	276.081	208.06	731.671	375.41	739.634	725.933	-72.9047	750.726	741.682	199.093	681.178	763.796	195.379	702.472	759.545	282.182	700.242	731.146	374.213
430	4.29	446.148	1230.99	39.6136	374.305	1211.24	-8.21799	516.326	1222.91	-10.6336	288.397	1059.15	-86.6061	621.582	1061.51	-115.642	466.383	998.475	-2.60996	210.69	711.746	-78.207	161.061	739.397	193.783	235.515	754.557	198.919	207.957	755.758	276.065	208.035	731.688	375.38	739.432	725.882	-73.1121	750.872	741.52	198.929	681.375	763.845	195.265	702.609	759.544	282.14	700.25	731.153	374.131
431	4.3	446.023	1230.89	39.5746	374.19	1211.17	-8.23877	516.214	1222.85	-10.5158	288.304	1059.05	-86.5918	621.541	1061.44	-115.629	466.277	998.427	-2.64821	210.686	711.662	-78.2132	161.05	739.368	193.774	235.503	754.542	198.906	207.944	755.764	276.07	208.012	731.683	375.363	739.216	725.751	-73.2879	750.939	741.362	198.834	681.477	763.832	195.193	702.687	759.529	282.098	700.258	731.135	374.062
432	4.31	445.925	1230.83	39.6328	374.088	1211.12	-8.1901	516.1	1222.76	-10.4127	288.212	1058.96	-86.6064	621.507	1061.35	-115.571	466.18	998.369	-2.6057	210.661	711.533	-78.198	161.032	739.382	193.769	235.491	754.559	198.899	207.939	755.775	276.078	207.996	731.679	375.381	738.984	725.564	-73.4706	750.92	741.233	198.795	681.5	763.796	195.192	702.694	759.519	282.072	700.272	731.134	374.041
433	4.32	445.834	1230.79	39.7808	373.992	1211.06	-8.15281	515.997	1222.67	-10.3542	288.115	1058.86	-86.6325	621.493	1061.25	-115.485	466.082	998.311	-2.56639	210.606	711.404	-78.2249	161.032	739.38	193.813	235.477	754.563	198.909	207.95	755.768	276.096	208.001	731.669	375.388	738.694	725.275	-73.5173	750.833	741.154	198.735	681.466	763.729	195.183	702.677	759.5	282.046	700.296	731.131	374.015
434	4.33	445.696	1230.72	39.8249	373.869	1210.97	-8.17386	515.885	1222.59	-10.2911	288.004	1058.76	-86.6805	621.466	1061.14	-115.41	465.964	998.217	-2.5902	210.567	711.294	-78.2378	161.021	739.347	193.814	235.47	754.544	198.923	207.961	755.743	276.093	208.019	731.644	375.404	738.331	724.916	-73.4039	750.695	741.084	198.696	681.347	763.603	195.157	702.607	759.481	282.019	700.306	731.112	374
435	4.34	445.517	1230.63	39.8152	373.706	1210.87	-8.22468	515.768	1222.52	-10.2264	287.875	1058.67	-86.767	621.429	1061	-115.339	465.798	998.102	-2.71835	210.536	711.2	-78.2696	160.992	739.317	193.771	235.444	754.528	198.878	207.936	755.722	276.036	208.018	731.626	375.379	737.928	724.56	-73.2267	750.531	741.045	198.639	681.126	763.439	195.1	702.51	759.476	281.997	700.288	731.081	373.967
436	4.35	445.311	1230.54	39.8756	373.507	1210.81	-8.27777	515.626	1222.48	-10.206	287.745	1058.58	-86.8552	621.382	1060.89	-115.257	465.615	998.047	-2.78274	210.511	711.088	-78.2718	160.954	739.303	193.744	235.392	754.545	198.846	207.894	755.72	276.008	207.974	731.629	375.331	737.507	724.275	-73.2202	750.345	741.032	198.527	680.842	763.287	195.055	702.389	759.496	281.98	700.254	731.062	373.964
437	4.36	445.091	1230.52	39.9743	373.307	1210.76	-8.2965	515.458	1222.46	-10.1256	287.61	1058.5	-86.9125	621.331	1060.75	-115.139	465.444	998.025	-2.67984	210.496	710.933	-78.2217	160.942	739.27	193.761	235.346	754.551	198.829	207.866	755.721	276.027	207.944	731.649	375.333	737.089	724.06	-73.4004	750.145	741.017	198.46	680.595	763.192	195.07	702.256	759.516	281.985	700.216	731.065	373.967
438	4.37	444.843	1230.47	39.9403	373.117	1210.72	-8.33454	515.283	1222.46	-10.0027	287.473	1058.42	-86.9998	621.313	1060.63	-114.985	465.284	998.017	-2.63963	210.5	710.807	-78.2144	160.936	739.251	193.751	235.325	754.568	198.788	207.858	755.727	276.03	207.942	731.668	375.303	736.665	723.796	-73.528	749.958	740.998	198.394	680.355	763.116	195.038	702.145	759.524	281.968	700.177	731.085	373.966
439	4.38	444.593	1230.46	39.9375	372.935	1210.73	-8.39687	515.122	1222.48	-9.94443	287.361	1058.37	-87.1203	621.309	1060.53	-114.898	465.132	998.064	-2.6137	210.535	710.672	-78.2079	160.923	739.269	193.687	235.32	754.609	198.727	207.845	755.761	275.975	207.942	731.7	375.264	736.243	723.424	-73.5261	749.773	740.99	198.317	680.136	763.066	194.956	702.053	759.551	281.957	700.144	731.111	373.908
440	4.39	444.377	1230.51	40.0471	372.781	1210.74	-8.37329	514.93	1222.49	-9.83768	287.262	1058.3	-87.1776	621.32	1060.43	-114.774	464.993	998.096	-2.49748	210.561	710.54	-78.1805	160.897	739.285	193.683	235.321	754.635	198.747	207.831	755.802	275.972	207.945	731.734	375.283	735.832	723.027	-73.4914	749.605	740.935	198.277	679.966	763.028	194.932	701.984	759.571	281.991	700.123	731.142	373.915
441	4.4	444.212	1230.55	40.2443	372.663	1210.72	-8.30327	514.738	1222.47	-9.70012	287.175	1058.2	-87.189	621.345	1060.31	-114.577	464.893	998.066	-2.38674	210.572	710.416	-78.1249	160.885	739.291	193.754	235.321	754.621	198.834	207.839	755.814	276.058	207.94	731.724	375.364	735.444	722.669	-73.4624	749.457	740.834	198.261	679.846	762.957	194.893	701.924	759.525	282.019	700.139	731.143	373.951
442	4.41	444.023	1230.54	40.1592	372.54	1210.7	-8.31178	514.585	1222.46	-9.60636	287.104	1058.1	-87.2322	621.393	1060.18	-114.389	464.81	998.011	-2.35239	210.568	710.284	-78.1273	160.894	739.296	193.779	235.318	754.604	198.833	207.853	755.805	276.058	207.919	731.707	375.338	735.111	722.368	-73.5779	749.344	740.738	198.24	679.747	762.878	194.757	701.894	759.48	281.977	700.143	731.13	373.851
443	4.42	443.823	1230.48	40.0579	372.404	1210.67	-8.34165	514.438	1222.47	-9.54781	287.039	1058	-87.3347	621.451	1060.05	-114.239	464.731	997.95	-2.36573	210.559	710.16	-78.1674	160.908	739.304	193.712	235.326	754.568	198.731	207.849	755.775	275.965	207.922	731.688	375.276	734.792	722.085	-73.7552	749.253	740.672	198.181	679.663	762.801	194.635	701.867	759.434	281.91	700.142	731.108	373.715
444	4.43	443.631	1230.45	40.0146	372.278	1210.62	-8.32036	514.274	1222.48	-9.50702	286.947	1057.88	-87.3744	621.512	1059.89	-114.034	464.648	997.878	-2.33372	210.508	710.022	-78.1545	160.917	739.265	193.713	235.339	754.53	198.723	207.867	755.732	275.968	207.951	731.653	375.298	734.481	721.759	-73.8178	749.167	740.594	198.109	679.583	762.708	194.546	701.828	759.362	281.898	700.135	731.085	373.669
445	4.44	443.448	1230.41	40.1085	372.119	1210.57	-8.30001	514.094	1222.51	-9.38006	286.858	1057.76	-87.4098	621.597	1059.73	-113.756	464.539	997.816	-2.2329	210.439	709.879	-78.1264	160.923	739.228	193.751	235.345	754.505	198.778	207.875	755.72	276.015	207.963	731.622	375.336	734.221	721.321	-73.7128	749.1	740.527	198.089	679.518	762.629	194.527	701.773	759.306	281.92	700.1	731.063	373.664
446	4.45	443.239	1230.44	40.2137	371.921	1210.56	-8.31463	513.933	1222.58	-9.25042	286.765	1057.63	-87.4479	621.687	1059.58	-113.496	464.383	997.781	-2.18054	210.377	709.743	-78.1265	160.933	739.226	193.778	235.338	754.502	198.759	207.885	755.723	276.014	207.959	731.627	375.288	734.038	720.927	-73.676	749.054	740.489	198.063	679.455	762.601	194.502	701.743	759.297	281.886	700.042	731.055	373.607
447	4.46	443.007	1230.49	40.241	371.732	1210.59	-8.30857	513.771	1222.66	-9.13783	286.66	1057.5	-87.4651	621.778	1059.43	-113.252	464.215	997.76	-2.12486	210.31	709.631	-78.1548	160.938	739.238	193.8	235.317	754.523	198.731	207.876	755.755	275.973	207.962	731.653	375.23	733.93	720.64	-73.6987	749.044	740.455	198.002	679.427	762.594	194.449	701.73	759.298	281.882	700.016	731.086	373.591
[truncated: 65 more rows]

## Sheet: Trial02
PathFileType	4	(X/Y/Z)	Trial02.trc
[truncated: 701 more rows]

## Sheet: Trial03
PathFileType	4	(X/Y/Z)	Trial03.trc
[truncated: 806 more rows]

[truncated: 2 more sheets: Trial04, Trial05]
