# Supplementary material for: Upper-Limb Kinematic Variables are correlated with Fugl-Meyer Assessment Sub Scales During a Hand-to-Mouth Functional Task in Post-Stroke Individuals
Source: Research Square preprint supplement (doi:10.21203/rs.3.rs-8270137/v1), 2025-12-16
Supplement: Supplementary file 7 [file Additional file 11.xls]

## Sheet: Static
PathFileType	4	(X/Y/Z)	Static.trc
DataRate	CameraRate	NumFrames	NumMarkers	Units	OrigDataRate	OrigDataStartFrame	OrigNumFrames
100	100	580	17	mm	100	1	580
Frame#	Time	nasion			r zyg pr			l zyg pr			r should			l should			sternum			r elbow			r ulna			r radius			r hand			r finger			l elbow			l ulna			l radius			l hand			l finger
		X1	Y1	Z1	X2	Y2	Z2	X3	Y3	Z3	X4	Y4	Z4	X5	Y5	Z5	X6	Y6	Z6	X7	Y7	Z7	X8	Y8	Z8	X9	Y9	Z9	X10	Y10	Z10	X11	Y11	Z11	X12	Y12	Z12	X13	Y13	Z13	X14	Y14	Z14	X15	Y15	Z15	X16	Y16	Z16
1	0	15.8764	1160.86	88.7698	88.0917	1158.25	132.692	-54.6541	1166.75	128.307	185.657	991.794	241.463	-148.22	980.936	248.204	9.86011	958.549	174.674	309.121	694.816	287.258	268.138	727.828	48.3716	202.955	743.949	62.8576	216.34	761.962	-11.6689	202.332	730.41	-100.712	-252.157	674.315	267.523	-225.681	727.715	20.4299	-160.343	742.405	38.6304	-178.793	760.198	-36.8475	-145.286	730.418	-120.693
2	0.01	15.9252	1160.77	88.8363	88.1125	1158.22	132.683	-54.6168	1166.69	128.303	185.665	991.75	241.438	-148.185	980.852	248.116	9.91364	958.465	174.662	309.129	694.747	287.23	268.166	727.804	48.3223	202.979	743.891	62.8311	216.393	761.899	-11.6558	202.394	730.353	-100.709	-252.141	674.29	267.552	-225.669	727.646	20.4177	-160.319	742.38	38.6229	-178.796	760.254	-36.9966	-145.269	730.353	-120.713
3	0.02	15.9471	1160.71	88.9153	88.1154	1158.19	132.691	-54.6045	1166.67	128.31	185.669	991.724	241.453	-148.171	980.811	248.112	9.94136	958.39	174.71	309.132	694.716	287.248	268.178	727.786	48.3725	202.984	743.844	62.8466	216.446	761.849	-11.604	202.444	730.259	-100.554	-252.128	674.283	267.598	-225.647	727.615	20.4376	-160.288	742.375	38.6269	-178.835	760.289	-37.0708	-145.255	730.331	-120.71
4	0.03	15.9498	1160.69	89.005	88.1152	1158.19	132.728	-54.6126	1166.65	128.339	185.667	991.696	241.459	-148.181	980.812	248.137	9.93576	958.317	174.781	309.129	694.719	287.298	268.167	727.783	48.4202	202.979	743.818	62.889	216.478	761.842	-11.5324	202.461	730.202	-100.441	-252.121	674.288	267.618	-225.641	727.615	20.4596	-160.293	742.364	38.6643	-178.847	760.268	-37.0477	-145.259	730.325	-120.672
5	0.04	15.9223	1160.72	88.9587	88.0777	1158.21	132.703	-54.6314	1166.67	128.311	185.627	991.691	241.411	-148.215	980.807	248.098	9.91447	958.296	174.754	309.083	694.732	287.283	268.109	727.809	48.3725	202.958	743.826	62.8632	216.443	761.864	-11.5614	202.42	730.223	-100.513	-252.134	674.261	267.548	-225.654	727.635	20.4192	-160.302	742.367	38.6463	-178.836	760.233	-37.0082	-145.272	730.337	-120.675
6	0.05	15.8852	1160.82	88.7895	88.0492	1158.25	132.645	-54.6561	1166.71	128.234	185.58	991.704	241.38	-148.25	980.826	248.059	9.89918	958.32	174.641	309.008	694.724	287.262	268.076	727.854	48.2873	202.956	743.885	62.8417	216.377	761.93	-11.6789	202.302	730.567	-100.98	-252.139	674.24	267.515	-225.667	727.658	20.4127	-160.305	742.397	38.6238	-178.826	760.199	-36.9401	-145.278	730.41	-120.765
7	0.06	15.8599	1160.92	88.6557	88.0461	1158.29	132.596	-54.6702	1166.77	128.178	185.566	991.721	241.394	-148.258	980.853	248.033	9.90844	958.353	174.524	308.961	694.724	287.287	268.08	727.885	48.2511	202.964	743.928	62.8488	216.333	762.01	-11.7345	202.189	730.999	-101.529	-252.115	674.249	267.595	-225.682	727.704	20.3917	-160.298	742.417	38.6336	-178.809	760.196	-36.8923	-145.269	730.5	-120.834
8	0.07	15.8243	1161.02	88.5023	88.0308	1158.34	132.581	-54.6979	1166.82	128.12	185.55	991.703	241.369	-148.265	980.842	248.011	9.90948	958.385	174.379	308.928	694.728	287.312	268.088	727.893	48.2395	202.949	743.959	62.8024	216.29	762.082	-11.8351	202.31	730.695	-101.117	-252.094	674.235	267.634	-225.695	727.751	20.3805	-160.307	742.444	38.6032	-178.796	760.218	-36.9083	-145.281	730.485	-120.767
9	0.08	15.7918	1161.06	88.3923	87.9984	1158.35	132.518	-54.724	1166.84	128.085	185.537	991.657	241.326	-148.27	980.817	247.975	9.89596	958.411	174.241	308.912	694.693	287.309	268.111	727.874	48.2163	202.942	743.984	62.7678	216.254	762.109	-11.8728	202.319	730.645	-101.037	-252.078	674.19	267.62	-225.712	727.765	20.3941	-160.323	742.462	38.5786	-178.779	760.257	-36.9894	-145.309	730.491	-120.77
10	0.09	15.7988	1160.99	88.5007	87.9888	1158.33	132.514	-54.7247	1166.77	128.164	185.549	991.623	241.353	-148.256	980.767	247.979	9.89896	958.339	174.329	308.953	694.623	287.292	268.133	727.834	48.3127	202.941	743.951	62.8152	216.28	762.051	-11.8038	202.343	730.525	-100.875	-252.039	674.126	267.598	-225.718	727.731	20.44	-160.326	742.425	38.6264	-178.794	760.257	-36.9867	-145.311	730.438	-120.728
11	0.1	15.8339	1160.87	88.7013	87.9811	1158.28	132.584	-54.7261	1166.67	128.25	185.573	991.579	241.39	-148.215	980.692	247.974	9.91363	958.177	174.52	309.024	694.579	287.297	268.139	727.805	48.3856	202.944	743.869	62.8595	216.359	761.955	-11.6775	202.385	730.361	-100.658	-252.014	674.077	267.58	-225.687	727.656	20.4891	-160.335	742.354	38.6947	-178.815	760.189	-36.945	-145.295	730.366	-120.66
12	0.11	15.8616	1160.76	88.8129	87.9883	1158.24	132.593	-54.7383	1166.6	128.243	185.574	991.514	241.361	-148.182	980.627	247.946	9.94407	958.016	174.641	309.044	694.558	287.304	268.156	727.771	48.4211	202.961	743.781	62.9098	216.425	761.853	-11.5771	202.425	730.249	-100.542	-252.007	674.056	267.572	-225.667	727.598	20.492	-160.321	742.309	38.715	-178.833	760.157	-36.9207	-145.284	730.313	-120.609
13	0.12	15.8677	1160.71	88.8872	88.0112	1158.21	132.58	-54.7297	1166.57	128.22	185.578	991.464	241.326	-148.176	980.607	247.937	9.9709	957.923	174.696	309.032	694.547	287.323	268.158	727.747	48.4566	202.985	743.737	62.8939	216.506	761.789	-11.533	202.464	730.184	-100.443	-252.014	674.042	267.566	-225.657	727.564	20.4776	-160.306	742.298	38.6969	-178.863	760.176	-36.9259	-145.264	730.33	-120.679
14	0.13	15.8462	1160.72	88.836	88.0249	1158.21	132.588	-54.7221	1166.58	128.226	185.571	991.456	241.297	-148.181	980.602	247.927	9.98937	957.884	174.757	309.026	694.55	287.336	268.143	727.762	48.4478	203.005	743.736	62.9112	216.555	761.797	-11.5275	202.478	730.165	-100.391	-252.034	674.068	267.611	-225.646	727.582	20.4995	-160.285	742.315	38.6903	-178.882	760.2	-36.9138	-145.24	730.421	-120.827
15	0.14	15.7872	1160.8	88.6296	87.9775	1158.23	132.489	-54.7429	1166.64	128.068	185.538	991.485	241.258	-148.196	980.623	247.859	9.97823	957.947	174.659	308.984	694.565	287.314	268.108	727.811	48.3668	202.989	743.807	62.8895	216.515	761.858	-11.6037	202.449	730.268	-100.517	-252.037	674.077	267.603	-225.649	727.64	20.4584	-160.284	742.362	38.6534	-178.864	760.202	-36.8812	-145.241	730.485	-120.901
16	0.15	15.7178	1160.94	88.3323	87.9354	1158.28	132.369	-54.7799	1166.73	127.914	185.491	991.517	241.204	-148.225	980.665	247.786	9.94152	958.099	174.418	308.905	694.576	287.298	268.068	727.864	48.2791	202.971	743.892	62.8735	216.386	761.959	-11.7431	202.393	730.439	-100.762	-252.038	674.072	267.58	-225.669	727.718	20.3974	-160.299	742.432	38.6025	-178.827	760.225	-36.907	-145.262	730.547	-120.91
17	0.16	15.6576	1161.04	88.1577	87.8908	1158.33	132.319	-54.8259	1166.78	127.858	185.467	991.529	241.19	-148.252	980.692	247.746	9.90779	958.197	174.256	308.859	694.582	287.301	268.067	727.899	48.2722	202.943	743.928	62.8545	216.277	762.031	-11.8333	202.328	730.568	-100.922	-252.036	674.073	267.572	-225.707	727.784	20.3589	-160.325	742.49	38.5825	-178.792	760.246	-36.9137	-145.307	730.55	-120.839
18	0.17	15.6209	1161.06	88.0896	87.8526	1158.34	132.276	-54.865	1166.78	127.842	185.457	991.512	241.187	-148.262	980.675	247.728	9.86451	958.197	174.211	308.863	694.574	287.308	268.074	727.88	48.3093	202.925	743.946	62.8308	216.231	762.06	-11.8514	202.28	730.618	-100.989	-252.019	674.058	267.591	-225.733	727.793	20.3853	-160.345	742.504	38.6054	-178.79	760.242	-36.8915	-145.336	730.58	-120.865
19	0.18	15.6205	1161	88.1016	87.8432	1158.31	132.25	-54.8917	1166.72	127.86	185.46	991.466	241.175	-148.244	980.617	247.712	9.85609	958.103	174.327	308.875	694.523	287.285	268.096	727.82	48.3297	202.928	743.917	62.8333	216.262	762.021	-11.7703	202.301	730.54	-100.896	-252.007	673.995	267.57	-225.727	727.75	20.4069	-160.357	742.441	38.6267	-178.813	760.241	-36.955	-145.348	730.571	-120.896
20	0.19	15.6675	1160.87	88.2469	87.8673	1158.25	132.287	-54.8803	1166.62	127.915	185.485	991.385	241.181	-148.203	980.532	247.745	9.90032	957.945	174.524	308.906	694.47	287.284	268.137	727.76	48.4051	202.959	743.825	62.8805	216.375	761.921	-11.6401	202.389	730.366	-100.654	-252.003	673.929	267.543	-225.703	727.665	20.4227	-160.341	742.364	38.6424	-178.822	760.234	-36.9978	-145.331	730.423	-120.772
21	0.2	15.6993	1160.72	88.4138	87.8927	1158.2	132.284	-54.8524	1166.54	127.979	185.522	991.32	241.185	-148.16	980.483	247.785	9.92558	957.789	174.692	308.942	694.44	287.315	268.167	727.723	48.4855	202.985	743.732	62.9263	216.505	761.836	-11.5286	202.475	730.22	-100.457	-252	673.906	267.561	-225.664	727.602	20.4561	-160.322	742.316	38.6804	-178.835	760.227	-36.9548	-145.282	730.329	-120.694
22	0.21	15.7222	1160.64	88.5197	87.9089	1158.17	132.275	-54.8213	1166.5	127.969	185.546	991.282	241.199	-148.137	980.464	247.804	9.95552	957.698	174.754	308.964	694.425	287.323	268.195	727.706	48.5295	203.005	743.673	62.9454	216.586	761.804	-11.4717	202.532	730.146	-100.338	-251.984	673.906	267.581	-225.629	727.575	20.4733	-160.292	742.289	38.7115	-178.852	760.186	-36.8775	-145.227	730.314	-120.707
23	0.22	15.7246	1160.63	88.4887	87.8999	1158.16	132.239	-54.8043	1166.51	127.879	185.539	991.268	241.173	-148.146	980.442	247.77	9.96989	957.677	174.744	308.939	694.429	287.339	268.177	727.729	48.5082	203.013	743.672	62.9475	216.595	761.797	-11.4935	202.54	730.14	-100.329	-251.982	673.914	267.579	-225.62	727.564	20.4809	-160.277	742.292	38.7084	-178.875	760.197	-36.9294	-145.213	730.369	-120.787
24	0.23	15.6675	1160.7	88.3196	87.8691	1158.18	132.177	-54.8366	1166.55	127.837	185.479	991.302	241.155	-148.188	980.463	247.756	9.93912	957.721	174.668	308.871	694.445	287.341	268.104	727.782	48.4013	202.976	743.739	62.9085	216.514	761.867	-11.5735	202.468	730.216	-100.455	-251.996	673.911	267.586	-225.653	727.598	20.4628	-160.299	742.325	38.6877	-178.879	760.189	-36.9228	-145.249	730.389	-120.761
25	0.24	15.5826	1160.84	88.0342	87.823	1158.23	132.098	-54.8867	1166.64	127.811	185.419	991.367	241.156	-148.235	980.51	247.751	9.85441	957.852	174.51	308.811	694.468	287.354	268.027	727.842	48.306	202.929	743.847	62.8685	216.362	761.989	-11.7151	202.371	730.385	-100.672	-251.99	673.917	267.607	-225.704	727.685	20.4658	-160.329	742.387	38.6975	-178.857	760.173	-36.8412	-145.294	730.541	-120.873
26	0.25	15.5365	1160.99	87.7665	87.7855	1158.28	132.024	-54.9257	1166.71	127.726	185.385	991.406	241.122	-148.261	980.549	247.747	9.79028	957.977	174.316	308.768	694.483	287.366	268.027	727.882	48.2709	202.898	743.926	62.8164	216.242	762.077	-11.8281	202.298	730.559	-100.877	-251.953	673.897	267.596	-225.725	727.76	20.4459	-160.344	742.469	38.6745	-178.831	760.216	-36.8782	-145.346	730.617	-120.896
27	0.26	15.5203	1161.05	87.6103	87.78	1158.28	131.987	-54.9373	1166.72	127.657	185.373	991.386	241.077	-148.267	980.54	247.712	9.77698	958.024	174.211	308.732	694.464	287.337	268.044	727.89	48.2762	202.894	743.956	62.7679	216.202	762.104	-11.8409	202.292	730.633	-100.992	-251.935	673.858	267.58	-225.735	727.787	20.3997	-160.354	742.49	38.6346	-178.815	760.284	-36.9803	-145.383	730.568	-120.799
28	0.27	15.5249	1160.99	87.6415	87.8058	1158.23	131.995	-54.9339	1166.68	127.662	185.377	991.352	241.09	-148.247	980.496	247.714	9.8028	957.958	174.291	308.73	694.428	287.323	268.056	727.861	48.317	202.902	743.92	62.7856	216.233	762.056	-11.8029	202.338	730.568	-100.915	-251.914	673.836	267.608	-225.732	727.758	20.3869	-160.345	742.439	38.6498	-178.816	760.289	-36.9686	-145.365	730.5	-120.731
29	0.28	15.5726	1160.85	87.8306	87.8234	1158.17	131.99	-54.9062	1166.6	127.696	185.407	991.295	241.15	-148.211	980.425	247.773	9.83682	957.816	174.514	308.78	694.385	287.339	268.093	727.82	48.3664	202.931	743.852	62.852	216.347	761.956	-11.6824	202.39	730.448	-100.775	-251.879	673.8	267.643	-225.689	727.687	20.4372	-160.316	742.378	38.6648	-178.84	760.258	-36.9816	-145.323	730.408	-120.683
30	0.29	15.6357	1160.69	88.065	87.8355	1158.1	132.012	-54.8738	1166.5	127.732	185.44	991.213	241.159	-148.19	980.351	247.805	9.86533	957.651	174.676	308.822	694.335	287.357	268.13	727.757	48.4355	202.964	743.748	62.9089	216.446	761.859	-11.5546	202.455	730.277	-100.566	-251.881	673.74	267.605	-225.665	727.611	20.4567	-160.31	742.319	38.6959	-178.851	760.224	-36.9768	-145.305	730.333	-120.646
31	0.3	15.6713	1160.56	88.2562	87.8658	1158.04	132.073	-54.8679	1166.41	127.772	185.447	991.146	241.16	-148.188	980.299	247.816	9.87903	957.504	174.862	308.835	694.293	287.325	268.154	727.703	48.5044	202.987	743.64	62.9678	216.542	761.775	-11.4564	202.512	730.112	-100.322	-251.909	673.696	267.561	-225.668	727.55	20.4794	-160.319	742.261	38.7299	-178.878	760.15	-36.8467	-145.296	730.272	-120.583
32	0.31	15.6809	1160.5	88.3464	87.8863	1157.99	132.092	-54.8699	1166.38	127.812	185.445	991.123	241.156	-148.183	980.281	247.816	9.87874	957.426	174.949	308.845	694.294	287.337	268.133	727.704	48.512	202.993	743.596	63.0108	216.596	761.734	-11.4269	202.526	730.054	-100.236	-251.915	673.667	267.505	-225.662	727.539	20.5007	-160.308	742.242	38.7551	-178.925	760.116	-36.7626	-145.268	730.298	-120.626
33	0.32	15.6491	1160.54	88.2095	87.8616	1158.01	132.001	-54.8557	1166.43	127.749	185.423	991.148	241.121	-148.191	980.28	247.793	9.85756	957.458	174.869	308.824	694.328	287.343	268.086	727.731	48.4533	202.969	743.629	62.9904	216.568	761.759	-11.494	202.508	730.12	-100.343	-251.892	673.661	267.489	-225.653	727.58	20.4671	-160.302	742.271	38.7163	-178.924	760.119	-36.7875	-145.252	730.417	-120.783
34	0.33	15.5642	1160.7	87.848	87.8203	1158.06	131.926	-54.878	1166.53	127.635	185.381	991.206	241.12	-148.214	980.313	247.765	9.82962	957.581	174.717	308.758	694.353	287.344	268.034	727.768	48.356	202.936	743.719	62.9294	216.444	761.86	-11.6236	202.429	730.279	-100.589	-251.887	673.667	267.503	-225.677	727.651	20.4286	-160.314	742.329	38.6531	-178.901	760.161	-36.8744	-145.287	730.502	-120.862
35	0.34	15.5048	1160.86	87.622	87.8295	1158.12	131.932	-54.9218	1166.63	127.584	185.347	991.26	241.135	-148.25	980.362	247.79	9.7807	957.733	174.53	308.695	694.348	287.337	268.023	727.814	48.3607	202.897	743.811	62.8993	216.322	761.975	-11.7288	202.355	730.478	-100.819	-251.871	673.662	267.523	-225.715	727.735	20.4207	-160.332	742.411	38.6413	-178.865	760.216	-36.9158	-145.345	730.529	-120.778
36	0.35	15.4975	1160.97	87.4817	87.8222	1158.16	131.905	-54.9222	1166.7	127.566	185.343	991.289	241.141	-148.246	980.398	247.821	9.75223	957.849	174.361	308.695	694.352	287.348	268.042	727.86	48.3629	202.884	743.893	62.8609	216.242	762.065	-11.7759	202.321	730.628	-100.97	-251.835	673.673	267.569	-225.713	727.812	20.4212	-160.338	742.486	38.6106	-178.809	760.288	-36.9638	-145.352	730.567	-120.73
37	0.36	15.5008	1161.01	87.4109	87.8191	1158.19	131.863	-54.9027	1166.71	127.538	185.353	991.272	241.125	-148.226	980.384	247.791	9.77859	957.868	174.291	308.701	694.329	287.352	268.063	727.863	48.3488	202.908	743.928	62.8404	216.233	762.076	-11.8177	202.334	730.661	-101.006	-251.801	673.674	267.592	-225.69	727.817	20.4216	-160.331	742.492	38.5932	-178.786	760.335	-37.0068	-145.34	730.564	-120.748
38	0.37	15.5518	1160.91	87.62	87.8492	1158.16	131.902	-54.8821	1166.64	127.562	185.382	991.21	241.136	-148.184	980.325	247.768	9.83343	957.754	174.411	308.707	694.285	287.343	268.088	727.814	48.3859	202.938	743.874	62.8762	216.32	762.014	-11.7836	202.396	730.546	-100.875	-251.804	673.649	267.599	-225.678	727.736	20.4396	-160.318	742.425	38.619	-178.777	760.319	-36.9542	-145.334	730.501	-120.753
39	0.38	15.624	1160.71	87.9661	87.8734	1158.1	131.963	-54.8634	1166.51	127.636	185.425	991.124	241.152	-148.154	980.249	247.789	9.88604	957.537	174.664	308.742	694.234	287.352	268.114	727.751	48.4634	202.965	743.75	62.9305	216.489	761.902	-11.606	202.489	730.314	-100.574	-251.818	673.599	267.552	-225.653	727.633	20.4895	-160.319	742.318	38.6974	-178.829	760.238	-36.864	-145.307	730.377	-120.667
40	0.39	15.6578	1160.56	88.1807	87.8802	1158.03	132.002	-54.8557	1166.41	127.746	185.44	991.052	241.169	-148.151	980.191	247.807	9.88973	957.362	174.83	308.765	694.167	287.343	268.125	727.706	48.5181	202.966	743.646	62.9589	216.555	761.811	-11.5005	202.528	730.148	-100.368	-251.833	673.565	267.528	-225.644	727.543	20.5319	-160.328	742.229	38.7588	-178.877	760.136	-36.8021	-145.284	730.272	-120.585
41	0.4	15.6621	1160.46	88.3135	87.8761	1157.99	132.011	-54.8649	1166.37	127.814	185.42	991.01	241.169	-148.167	980.159	247.816	9.85867	957.282	174.945	308.756	694.131	287.332	268.105	727.693	48.525	202.954	743.599	62.9646	216.54	761.778	-11.4801	202.513	730.074	-100.267	-251.862	673.546	267.513	-225.661	727.513	20.54	-160.334	742.194	38.7875	-178.911	760.095	-36.7728	-145.297	730.249	-120.574
42	0.41	15.6428	1160.48	88.3225	87.8545	1157.99	132.01	-54.8795	1166.41	127.818	185.396	991.031	241.158	-148.189	980.169	247.828	9.83949	957.288	174.982	308.729	694.164	287.37	268.063	727.722	48.4766	202.943	743.605	62.9899	216.529	761.768	-11.4566	202.493	730.072	-100.232	-251.873	673.573	267.517	-225.67	727.539	20.5229	-160.328	742.226	38.7976	-178.93	760.092	-36.7653	-145.314	730.277	-120.561
43	0.42	15.5846	1160.64	88.0662	87.8275	1158.06	131.946	-54.88	1166.51	127.734	185.379	991.095	241.118	-148.2	980.23	247.797	9.82638	957.405	174.824	308.693	694.23	287.403	268.019	727.791	48.3594	202.925	743.679	62.9627	216.436	761.862	-11.5637	202.432	730.209	-100.438	-251.866	673.615	267.546	-225.68	727.625	20.4719	-160.32	742.29	38.7612	-178.918	760.162	-36.8555	-145.318	730.384	-120.65
44	0.43	15.5078	1160.86	87.6763	87.8155	1158.15	131.85	-54.8824	1166.63	127.623	185.344	991.165	241.091	-148.21	980.291	247.772	9.79693	957.6	174.546	308.63	694.266	287.392	267.996	727.86	48.2686	202.894	743.81	62.8791	216.301	761.986	-11.7505	202.355	730.464	-100.797	-251.854	673.621	267.538	-225.703	727.739	20.4192	-160.323	742.377	38.6634	-178.874	760.257	-36.9571	-145.343	730.549	-120.831
45	0.44	15.4946	1160.99	87.4992	87.8184	1158.2	131.845	-54.8785	1166.71	127.587	185.335	991.192	241.096	-148.216	980.317	247.772	9.79186	957.724	174.399	308.587	694.247	287.396	268.019	727.881	48.313	202.894	743.887	62.8614	216.242	762.059	-11.806	202.338	730.635	-100.985	-251.842	673.613	267.571	-225.726	727.805	20.4302	-160.328	742.444	38.5825	-178.828	760.318	-36.9929	-145.375	730.583	-120.809
46	0.45	15.5536	1160.99	87.5607	87.8582	1158.21	131.888	-54.8715	1166.73	127.587	185.364	991.169	241.093	-148.187	980.292	247.783	9.82355	957.73	174.424	308.583	694.204	287.405	268.046	727.864	48.3761	202.914	743.901	62.8538	216.262	762.074	-11.7931	202.354	730.651	-100.984	-251.82	673.583	267.574	-225.718	727.791	20.4358	-160.321	742.451	38.6079	-178.804	760.342	-36.973	-145.371	730.569	-120.791
47	0.46	15.5855	1160.92	87.7103	87.8957	1158.16	131.921	-54.8572	1166.67	127.646	185.397	991.116	241.126	-148.146	980.246	247.79	9.86631	957.638	174.542	308.615	694.161	287.399	268.07	727.807	48.3847	202.935	743.845	62.8976	216.325	762.025	-11.737	202.394	730.549	-100.88	-251.793	673.531	267.54	-225.7	727.738	20.4683	-160.303	742.375	38.6638	-178.803	760.27	-36.8817	-145.349	730.489	-120.722
48	0.47	15.6421	1160.77	87.9895	87.9255	1158.11	131.966	-54.8316	1166.56	127.742	185.44	991.041	241.137	-148.104	980.201	247.782	9.90371	957.491	174.693	308.654	694.108	287.375	268.084	727.748	48.4361	202.96	743.734	62.9342	216.448	761.92	-11.6177	202.463	730.365	-100.634	-251.784	673.488	267.498	-225.686	727.654	20.4823	-160.303	742.286	38.7175	-178.833	760.161	-36.7696	-145.311	730.389	-120.671
49	0.48	15.706	1160.62	88.2816	87.9442	1158.05	132.014	-54.8107	1166.48	127.835	185.46	990.956	241.144	-148.081	980.142	247.809	9.91513	957.356	174.867	308.679	694.022	287.351	268.105	727.703	48.5373	202.974	743.63	62.9885	216.552	761.819	-11.5324	202.504	730.209	-100.432	-251.787	673.464	267.485	-225.657	727.573	20.5249	-160.304	742.221	38.7535	-178.874	760.091	-36.7155	-145.297	730.314	-120.636
50	0.49	15.7172	1160.55	88.395	87.9401	1158.03	132.045	-54.7949	1166.47	127.885	185.469	990.897	241.165	-148.081	980.112	247.831	9.92219	957.297	174.949	308.668	693.963	287.339	268.091	727.672	48.5408	202.961	743.597	63.0093	216.582	761.777	-11.5041	202.508	730.15	-100.363	-251.79	673.469	267.498	-225.655	727.55	20.5565	-160.315	742.203	38.7625	-178.897	760.072	-36.7289	-145.3	730.288	-120.607
51	0.5	15.7106	1160.6	88.3297	87.9353	1158.04	132.03	-54.7654	1166.51	127.88	185.47	990.903	241.159	-148.08	980.14	247.833	9.91751	957.333	174.93	308.656	693.968	287.368	268.075	727.694	48.5177	202.944	743.623	62.9865	216.554	761.794	-11.4987	202.486	730.175	-100.391	-251.779	673.491	267.537	-225.668	727.574	20.5387	-160.297	742.235	38.7022	-178.884	760.124	-36.7943	-145.303	730.309	-120.618
52	0.51	15.702	1160.71	88.1897	87.9546	1158.08	131.999	-54.7476	1166.6	127.829	185.459	990.944	241.157	-148.081	980.188	247.82	9.91638	957.413	174.869	308.628	694.008	287.404	268.052	727.748	48.4694	202.939	743.673	62.988	216.499	761.826	-11.5313	202.45	730.275	-100.515	-251.77	673.521	267.546	-225.667	727.628	20.5128	-160.279	742.316	38.6662	-178.871	760.216	-36.8938	-145.312	730.368	-120.652
53	0.52	15.6881	1160.84	87.9735	87.9744	1158.12	131.957	-54.7368	1166.71	127.705	185.439	990.986	241.126	-148.081	980.246	247.81	9.90045	957.496	174.734	308.576	694.063	287.411	268.028	727.81	48.3898	202.923	743.759	62.9514	216.39	761.91	-11.6522	202.406	730.416	-100.705	-251.761	673.567	267.544	-225.672	727.719	20.4337	-160.279	742.389	38.6364	-178.848	760.289	-36.9643	-145.313	730.487	-120.764
54	0.53	15.6758	1160.94	87.7955	87.9852	1158.15	131.924	-54.7272	1166.78	127.636	185.421	991.016	241.109	-148.081	980.273	247.804	9.88563	957.537	174.631	308.548	694.078	287.415	268.022	727.846	48.3441	202.912	743.819	62.9008	216.302	761.985	-11.756	202.372	730.526	-100.856	-251.749	673.59	267.567	-225.685	727.78	20.3883	-160.281	742.411	38.624	-178.838	760.316	-36.9955	-145.333	730.585	-120.859
55	0.54	15.6839	1160.96	87.7578	87.9975	1158.14	131.918	-54.7027	1166.76	127.648	185.422	990.991	241.104	-148.079	980.266	247.815	9.88162	957.493	174.597	308.536	694.063	287.466	268.035	727.82	48.3678	202.907	743.82	62.9024	216.298	761.994	-11.7428	202.352	730.523	-100.852	-251.751	673.591	267.595	-225.699	727.769	20.3982	-160.296	742.393	38.6461	-178.835	760.294	-36.9789	-145.353	730.511	-120.719
56	0.55	15.7527	1160.84	87.937	88.0117	1158.09	131.923	-54.6826	1166.69	127.688	185.441	990.927	241.108	-148.079	980.227	247.839	9.88667	957.378	174.659	308.533	693.988	287.458	268.043	727.766	48.4017	202.908	743.762	62.9411	216.367	761.969	-11.6496	202.371	730.41	-100.739	-251.777	673.544	267.553	-225.705	727.702	20.4482	-160.318	742.325	38.6953	-178.849	760.227	-36.9406	-145.355	730.427	-120.656
57	0.56	15.805	1160.74	88.0627	88.0374	1158.04	131.922	-54.6489	1166.63	127.768	185.457	990.857	241.137	-148.088	980.176	247.828	9.88798	957.25	174.759	308.529	693.885	287.383	268.045	727.735	48.4255	202.904	743.715	62.9397	216.422	761.918	-11.6134	202.417	730.299	-100.609	-251.806	673.497	267.526	-225.705	727.629	20.4908	-160.325	742.268	38.7105	-178.849	760.131	-36.7963	-145.356	730.359	-120.627
58	0.57	15.8661	1160.67	88.1689	88.093	1157.99	131.941	-54.6001	1166.57	127.836	185.481	990.809	241.134	-148.078	980.161	247.815	9.89483	957.147	174.831	308.556	693.836	287.343	268.058	727.718	48.4371	202.915	743.657	62.9377	216.472	761.857	-11.5604	202.458	730.215	-100.497	-251.817	673.493	267.527	-225.685	727.601	20.4937	-160.325	742.226	38.7427	-178.857	760.102	-36.7198	-145.342	730.322	-120.592
59	0.58	15.9324	1160.61	88.232	88.1586	1157.94	131.958	-54.5371	1166.54	127.828	185.497	990.778	241.121	-148.056	980.16	247.788	9.91398	957.086	174.843	308.579	693.828	287.349	268.077	727.715	48.4495	202.935	743.619	62.9558	216.512	761.818	-11.5172	202.489	730.171	-100.436	-251.82	673.506	267.514	-225.663	727.579	20.4865	-160.317	742.216	38.7765	-178.891	760.144	-36.7897	-145.343	730.304	-120.6
60	0.59	15.9734	1160.61	88.1726	88.2041	1157.92	131.953	-54.4855	1166.59	127.738	185.49	990.781	241.12	-148.072	980.179	247.818	9.92717	957.115	174.798	308.546	693.815	287.356	268.062	727.736	48.4405	202.93	743.638	62.9544	216.518	761.81	-11.5173	202.486	730.21	-100.439	-251.839	673.513	267.506	-225.664	727.582	20.5124	-160.314	742.252	38.7638	-178.888	760.206	-36.9051	-145.35	730.324	-120.609
61	0.6	16.0093	1160.68	88.0436	88.2342	1157.94	131.925	-54.436	1166.65	127.636	185.48	990.821	241.134	-148.084	980.2	247.859	9.9199	957.189	174.74	308.502	693.818	287.383	268.048	727.772	48.4045	202.94	743.708	62.9557	216.472	761.858	-11.5658	202.468	730.317	-100.56	-251.85	673.532	267.544	-225.669	727.635	20.5351	-160.305	742.326	38.6897	-178.868	760.272	-36.9851	-145.33	730.374	-120.597
62	0.61	16.044	1160.73	87.8954	88.2664	1157.93	131.867	-54.3779	1166.71	127.539	185.476	990.855	241.16	-148.084	980.22	247.874	9.91804	957.247	174.668	308.498	693.869	287.466	268.047	727.804	48.3756	202.949	743.76	62.9665	216.428	761.929	-11.6245	202.462	730.413	-100.666	-251.839	673.532	267.563	-225.652	727.699	20.5138	-160.279	742.37	38.6599	-178.826	760.29	-36.9632	-145.305	730.471	-120.69
63	0.62	16.0832	1160.74	87.7929	88.3016	1157.92	131.806	-54.3309	1166.76	127.449	185.473	990.868	241.175	-148.089	980.224	247.882	9.91199	957.287	174.599	308.472	693.909	287.506	268.053	727.813	48.3909	202.944	743.786	62.9676	216.404	761.982	-11.6699	202.451	730.496	-100.771	-251.833	673.533	267.551	-225.654	727.747	20.4625	-160.274	742.39	38.6539	-178.786	760.249	-36.8531	-145.298	730.612	-120.866
64	0.63	16.1125	1160.72	87.7366	88.3367	1157.88	131.791	-54.3211	1166.78	127.382	185.456	990.875	241.156	-148.101	980.224	247.858	9.90081	957.268	174.617	308.438	693.905	287.47	268.038	727.799	48.4113	202.928	743.792	62.946	216.39	762.006	-11.7152	202.434	730.501	-100.792	-251.846	673.518	267.522	-225.684	727.749	20.4195	-160.3	742.375	38.6817	-178.814	760.169	-36.7255	-145.31	730.619	-120.87
65	0.64	16.1139	1160.65	87.7055	88.3579	1157.81	131.753	-54.3102	1166.72	127.375	185.45	990.837	241.135	-148.108	980.189	247.827	9.87922	957.197	174.657	308.42	693.876	287.431	268.019	727.765	48.4197	202.908	743.763	62.9439	216.405	761.978	-11.6811	202.417	730.454	-100.738	-251.843	673.477	267.518	-225.705	727.717	20.4233	-160.316	742.333	38.6674	-178.862	760.113	-36.7225	-145.326	730.541	-120.781
66	0.65	16.1459	1160.53	87.7797	88.3852	1157.73	131.772	-54.2784	1166.63	127.384	185.451	990.773	241.159	-148.109	980.146	247.858	9.87013	957.108	174.734	308.432	693.801	287.427	268.019	727.721	48.4755	202.914	743.705	62.981	216.446	761.928	-11.6009	202.406	730.367	-100.662	-251.82	673.43	267.504	-225.696	727.665	20.4704	-160.333	742.282	38.6821	-178.882	760.118	-36.7495	-145.327	730.505	-120.776
67	0.66	16.2195	1160.43	87.9236	88.437	1157.66	131.831	-54.2316	1166.57	127.378	185.463	990.706	241.18	-148.096	980.112	247.893	9.87534	957.043	174.772	308.434	693.694	287.404	268.047	727.684	48.5397	202.927	743.642	63.0042	216.53	761.841	-11.4805	202.451	730.254	-100.503	-251.805	673.408	267.516	-225.683	727.601	20.4902	-160.328	742.24	38.7259	-178.89	760.145	-36.774	-145.333	730.374	-120.636
68	0.67	16.3043	1160.38	87.9681	88.4944	1157.63	131.837	-54.1768	1166.5	127.369	185.479	990.658	241.175	-148.077	980.092	247.86	9.89238	957.017	174.748	308.446	693.638	287.337	268.084	727.676	48.5525	202.953	743.605	63.003	216.57	761.792	-11.4495	202.507	730.188	-100.409	-251.787	673.416	267.529	-225.664	727.572	20.507	-160.301	742.217	38.7356	-178.898	760.228	-36.9141	-145.335	730.31	-120.588
69	0.68	16.3549	1160.39	87.9072	88.5233	1157.61	131.807	-54.1351	1166.49	127.333	185.5	990.665	241.148	-148.063	980.108	247.833	9.91979	957.027	174.697	308.471	693.62	287.295	268.091	727.706	48.5322	202.97	743.61	62.9827	216.566	761.779	-11.4618	202.526	730.203	-100.451	-251.764	673.445	267.555	-225.637	727.591	20.475	-160.288	742.224	38.7288	-178.894	760.327	-37.0903	-145.33	730.303	-120.583
70	0.69	16.3529	1160.43	87.8316	88.5168	1157.64	131.784	-54.1192	1166.54	127.334	185.492	990.701	241.173	-148.077	980.143	247.855	9.92015	957.043	174.675	308.45	693.646	287.33	268.058	727.75	48.4836	202.944	743.664	62.9646	216.522	761.816	-11.4839	202.494	730.264	-100.516	-251.745	673.48	267.59	-225.642	727.632	20.4696	-160.296	742.249	38.7161	-178.879	760.391	-37.1476	-145.333	730.339	-120.607
71	0.7	16.3294	1160.5	87.7472	88.501	1157.67	131.768	-54.1244	1166.61	127.311	185.464	990.733	241.224	-148.098	980.17	247.857	9.89615	957.06	174.645	308.387	693.695	287.409	268.011	727.79	48.4294	202.921	743.719	62.9765	216.42	761.905	-11.5594	202.431	730.362	-100.626	-251.742	673.485	267.613	-225.672	727.693	20.47	-160.311	742.297	38.7311	-178.869	760.333	-37.0199	-145.354	730.408	-120.623
72	0.71	16.3071	1160.56	87.6449	88.4836	1157.72	131.704	-54.1407	1166.67	127.235	185.438	990.759	241.252	-148.124	980.186	247.854	9.86542	957.104	174.585	308.344	693.758	287.505	267.991	727.806	48.4152	202.89	743.756	62.9589	216.351	761.995	-11.6614	202.367	730.465	-100.762	-251.759	673.47	267.596	-225.708	727.734	20.4868	-160.328	742.341	38.7061	-178.859	760.204	-36.8199	-145.366	730.503	-120.701
73	0.72	16.3204	1160.58	87.6007	88.4911	1157.75	131.668	-54.1348	1166.7	127.204	185.447	990.768	241.262	-148.123	980.197	247.839	9.8765	957.096	174.585	308.336	693.783	287.541	267.984	727.797	48.4237	202.878	743.767	62.9464	216.337	762.053	-11.7264	202.352	730.501	-100.813	-251.775	673.448	267.578	-225.72	727.759	20.4762	-160.332	742.338	38.7292	-178.873	760.133	-36.7285	-145.358	730.628	-120.848
74	0.73	16.3572	1160.56	87.6649	88.5082	1157.75	131.676	-54.1158	1166.7	127.216	185.476	990.748	241.252	-148.091	980.197	247.827	9.89995	957.05	174.64	308.342	693.773	287.538	267.986	727.783	48.4382	202.881	743.757	62.9486	216.366	762.063	-11.7226	202.371	730.481	-100.785	-251.776	673.433	267.561	-225.711	727.757	20.4675	-160.308	742.318	38.7396	-178.864	760.042	-36.5582	-145.334	730.63	-120.889
75	0.74	16.4046	1160.51	87.7446	88.5506	1157.7	131.716	-54.0751	1166.65	127.232	185.5	990.694	241.222	-148.059	980.167	247.789	9.93838	956.965	174.692	308.354	693.701	287.481	268.01	727.751	48.4493	202.909	743.721	62.9788	216.417	762.018	-11.6722	202.422	730.405	-100.708	-251.775	673.433	267.545	-225.688	727.712	20.452	-160.309	742.276	38.7319	-178.855	760.019	-36.5511	-145.328	730.548	-120.824
76	0.75	16.4431	1160.48	87.8576	88.5952	1157.68	131.785	-54.0456	1166.61	127.297	185.532	990.635	241.204	-148.026	980.123	247.768	9.97982	956.912	174.714	308.374	693.586	287.395	268.05	727.713	48.4787	202.94	743.674	62.9921	216.492	761.926	-11.5773	202.479	730.305	-100.569	-251.766	673.405	267.51	-225.666	727.667	20.4507	-160.302	742.251	38.7187	-178.833	760.08	-36.65	-145.319	730.404	-120.664
77	0.76	16.472	1160.47	87.9805	88.6442	1157.66	131.859	-54.0185	1166.59	127.347	185.565	990.586	241.193	-147.986	980.096	247.788	10.0038	956.901	174.72	308.401	693.481	287.334	268.099	727.696	48.5571	202.977	743.645	62.9983	216.56	761.828	-11.4628	202.546	730.231	-100.442	-251.745	673.404	267.533	-225.644	727.627	20.5098	-160.272	742.245	38.7347	-178.814	760.197	-36.8027	-145.305	730.348	-120.618
78	0.77	16.4898	1160.48	88.0626	88.6735	1157.67	131.91	-53.9904	1166.59	127.392	185.595	990.563	241.195	-147.968	980.095	247.817	10.0326	956.912	174.744	308.41	693.423	287.285	268.133	727.696	48.6294	203.016	743.63	63.0585	216.588	761.764	-11.4118	202.575	730.218	-100.388	-251.739	673.448	267.608	-225.621	727.609	20.5313	-160.247	742.251	38.7405	-178.806	760.289	-36.9011	-145.288	730.309	-120.555
79	0.78	16.4982	1160.51	88.0391	88.6827	1157.69	131.917	-53.9714	1166.63	127.404	185.608	990.578	241.197	-147.96	980.103	247.813	10.0426	956.949	174.704	308.396	693.43	287.284	268.124	727.717	48.5999	203.01	743.644	63.0495	216.587	761.77	-11.4058	202.563	730.271	-100.474	-251.757	673.484	267.626	-225.62	727.631	20.4848	-160.257	742.284	38.7044	-178.809	760.366	-36.9962	-145.283	730.323	-120.542
80	0.79	16.4909	1160.58	87.9721	88.6702	1157.72	131.872	-53.9712	1166.7	127.344	185.598	990.618	241.197	-147.963	980.137	247.794	10.0437	957.004	174.639	308.375	693.505	287.335	268.1	727.747	48.5417	202.987	743.688	63.0084	216.555	761.837	-11.4898	202.52	730.349	-100.608	-251.767	673.508	267.607	-225.635	727.688	20.4633	-160.262	742.326	38.6846	-178.81	760.346	-36.9712	-145.29	730.417	-120.64
81	0.8	16.4604	1160.67	87.8576	88.6255	1157.78	131.832	-53.9964	1166.79	127.34	185.578	990.676	241.21	-147.982	980.167	247.775	10.0195	957.039	174.609	308.351	693.603	287.412	268.062	727.776	48.4873	202.959	743.73	63.0174	216.498	761.926	-11.5822	202.463	730.435	-100.724	-251.787	673.501	267.565	-225.672	727.732	20.4725	-160.288	742.356	38.6586	-178.837	760.266	-36.8499	-145.296	730.532	-120.782
82	0.81	16.4205	1160.71	87.7738	88.5967	1157.79	131.829	-54.0284	1166.84	127.361	185.544	990.704	241.218	-148.017	980.182	247.772	9.9946	957.041	174.614	308.31	693.657	287.482	268.009	727.773	48.4757	202.914	743.744	63.0065	216.431	761.996	-11.6665	202.404	730.506	-100.81	-251.83	673.488	267.548	-225.711	727.759	20.4657	-160.309	742.359	38.682	-178.859	760.117	-36.6817	-145.345	730.564	-120.773
83	0.82	16.399	1160.72	87.8037	88.5918	1157.78	131.869	-54.0385	1166.86	127.368	185.515	990.696	241.228	-148.033	980.179	247.774	9.95408	957.002	174.643	308.29	693.675	287.518	267.971	727.744	48.4741	202.869	743.736	62.982	216.385	762.027	-11.702	202.357	730.502	-100.84	-251.848	673.47	267.541	-225.736	727.752	20.4507	-160.332	742.343	38.7001	-178.901	760.045	-36.6441	-145.375	730.602	-120.82
84	0.83	16.4023	1160.66	87.9482	88.5977	1157.77	131.922	-54.0238	1166.81	127.461	185.533	990.648	241.22	-148.02	980.153	247.788	9.94496	956.915	174.707	308.326	693.655	287.48	267.971	727.7	48.4764	202.857	743.694	62.9798	216.392	761.971	-11.6691	202.349	730.417	-100.746	-251.839	673.444	267.49	-225.734	727.721	20.4464	-160.35	742.289	38.6968	-178.916	760.032	-36.6831	-145.365	730.53	-120.751
85	0.84	16.4326	1160.57	88.1402	88.6261	1157.74	131.996	-53.9879	1166.75	127.519	185.553	990.593	241.206	-147.994	980.118	247.785	9.95172	956.848	174.764	308.378	693.588	287.404	267.992	727.687	48.4685	202.879	743.635	62.9924	216.428	761.87	-11.5839	202.39	730.281	-100.572	-251.808	673.441	267.484	-225.704	727.67	20.4528	-160.347	742.237	38.7477	-178.9	760.04	-36.7419	-145.351	730.475	-120.756
86	0.85	16.4938	1160.54	88.2255	88.6857	1157.71	132.085	-53.9426	1166.72	127.605	185.585	990.543	241.22	-147.961	980.084	247.802	9.97972	956.825	174.801	308.42	693.472	287.312	268.036	727.692	48.5321	202.918	743.592	63.018	216.482	761.801	-11.4916	202.469	730.21	-100.445	-251.773	673.451	267.532	-225.674	727.631	20.486	-160.316	742.228	38.7734	-178.875	760.167	-36.8934	-145.345	730.34	-120.601
87	0.86	16.5805	1160.57	88.2011	88.7734	1157.71	132.123	-53.8715	1166.71	127.66	185.612	990.52	241.217	-147.925	980.073	247.821	10.0386	956.841	174.749	308.444	693.399	287.262	268.109	727.696	48.606	202.991	743.591	63.0267	216.565	761.759	-11.4227	202.559	730.208	-100.405	-251.744	673.461	267.579	-225.629	727.622	20.5068	-160.262	742.232	38.7661	-178.84	760.35	-37.0627	-145.313	730.294	-120.557
88	0.87	16.6735	1160.61	88.1446	88.8282	1157.74	132.125	-53.804	1166.73	127.638	185.621	990.529	241.203	-147.917	980.073	247.799	10.0765	956.894	174.651	308.443	693.413	287.285	268.152	727.714	48.589	203.02	743.632	62.9756	216.604	761.775	-11.4286	202.604	730.242	-100.442	-251.726	673.461	267.583	-225.596	727.612	20.525	-160.234	742.236	38.7331	-178.825	760.442	-37.1503	-145.292	730.295	-120.569
89	0.88	16.7089	1160.68	88.0558	88.823	1157.8	132.11	-53.7932	1166.78	127.579	185.603	990.565	241.21	-147.941	980.1	247.801	10.0749	956.945	174.597	308.403	693.475	287.362	268.122	727.749	48.5184	203.004	743.698	62.9825	216.577	761.855	-11.4781	202.571	730.329	-100.576	-251.736	673.448	267.587	-225.621	727.64	20.5252	-160.248	742.265	38.7323	-178.831	760.408	-37.0388	-145.303	730.33	-120.573
90	0.89	16.6837	1160.76	87.9629	88.784	1157.86	132.088	-53.818	1166.87	127.495	185.556	990.627	241.225	-147.982	980.131	247.805	10.0375	956.957	174.613	308.34	693.555	287.43	268.058	727.768	48.4583	202.945	743.776	62.9766	216.462	761.971	-11.6096	202.489	730.432	-100.693	-251.763	673.421	267.561	-225.666	727.702	20.4976	-160.28	742.295	38.7468	-178.83	760.284	-36.8718	-145.337	730.421	-120.62
91	0.9	16.6417	1160.8	87.9113	88.756	1157.86	132.084	-53.8543	1166.92	127.443	185.523	990.664	241.244	-148.019	980.133	247.803	9.97848	956.94	174.659	308.313	693.644	287.496	267.995	727.776	48.4216	202.88	743.789	62.9404	216.347	762.057	-11.7158	202.389	730.491	-100.751	-251.77	673.378	267.524	-225.71	727.742	20.4895	-160.327	742.311	38.7469	-178.839	760.104	-36.6947	-145.382	730.497	-120.675
92	0.91	16.6216	1160.79	87.9644	88.7367	1157.84	132.14	-53.8787	1166.92	127.458	185.501	990.682	241.253	-148.039	980.122	247.805	9.94796	956.905	174.741	308.319	693.686	287.563	267.963	727.775	48.444	202.843	743.755	62.9516	216.299	762.089	-11.7471	202.335	730.497	-100.758	-251.768	673.341	267.519	-225.746	727.766	20.4992	-160.359	742.317	38.7595	-178.853	759.986	-36.5344	-145.402	730.548	-120.689
93	0.92	16.6595	1160.75	87.9943	88.7669	1157.82	132.183	-53.8366	1166.9	127.477	185.513	990.667	241.262	-148.026	980.102	247.806	9.95952	956.869	174.778	308.322	693.653	287.528	267.978	727.752	48.4724	202.862	743.73	62.9783	216.31	762.062	-11.7308	202.36	730.461	-100.693	-251.754	673.332	267.522	-225.736	727.761	20.5127	-160.332	742.309	38.7443	-178.848	759.998	-36.5023	-145.366	730.614	-120.801
94	0.93	16.7533	1160.69	88.0075	88.8352	1157.78	132.183	-53.7625	1166.85	127.451	185.572	990.609	241.25	-147.989	980.078	247.787	10.0259	956.864	174.741	308.35	693.567	287.426	268.041	727.73	48.4584	202.923	743.691	62.976	216.432	761.955	-11.6316	202.452	730.379	-100.645	-251.721	673.341	267.531	-225.686	727.711	20.4841	-160.267	742.31	38.6776	-178.827	760.119	-36.7252	-145.298	730.557	-120.817
95	0.94	16.8311	1160.64	88.0396	88.9099	1157.73	132.205	-53.6998	1166.79	127.47	185.618	990.55	241.234	-147.934	980.05	247.796	10.0828	956.867	174.722	308.39	693.476	287.365	268.107	727.712	48.5297	202.992	743.647	62.9848	216.581	761.831	-11.4681	202.549	730.294	-100.538	-251.686	673.351	267.553	-225.633	727.678	20.4628	-160.221	742.281	38.6722	-178.81	760.273	-36.9346	-145.263	730.419	-120.707
96	0.95	16.8889	1160.6	88.0986	88.9654	1157.69	132.317	-53.6655	1166.74	127.555	185.64	990.53	241.261	-147.902	980.027	247.824	10.119	956.854	174.787	308.427	693.39	287.317	268.156	727.7	48.6281	203.045	743.61	63.0518	216.663	761.764	-11.3544	202.627	730.24	-100.393	-251.672	673.358	267.602	-225.602	727.654	20.5095	-160.206	742.252	38.7504	-178.808	760.355	-36.986	-145.25	730.339	-120.585
97	0.96	16.8697	1160.59	88.1033	88.9605	1157.66	132.329	-53.6833	1166.73	127.554	185.634	990.514	241.272	-147.907	980.022	247.828	10.1034	956.86	174.79	308.421	693.34	287.28	268.144	727.701	48.6129	203.034	743.603	63.0595	216.661	761.749	-11.3643	202.631	730.227	-100.368	-251.67	673.349	267.574	-225.607	727.634	20.547	-160.222	742.24	38.7767	-178.823	760.357	-36.9765	-145.263	730.314	-120.56
98	0.97	16.8077	1160.59	88.0512	88.8808	1157.67	132.248	-53.7531	1166.72	127.493	185.592	990.504	241.271	-147.954	980.031	247.825	10.043	956.853	174.784	308.367	693.375	287.326	268.082	727.697	48.5675	202.969	743.604	63.0169	216.603	761.788	-11.4349	202.557	730.229	-100.422	-251.71	673.343	267.53	-225.652	727.622	20.5338	-160.281	742.224	38.7725	-178.855	760.268	-36.9398	-145.312	730.326	-120.58
99	0.98	16.722	1160.62	88.0319	88.7789	1157.71	132.181	-53.8398	1166.75	127.468	185.525	990.536	241.309	-148.022	980.05	247.811	9.97001	956.849	174.845	308.3	693.467	287.433	268.005	727.69	48.5465	202.889	743.62	63.0229	216.481	761.883	-11.5458	202.429	730.305	-100.553	-251.764	673.32	267.49	-225.718	727.643	20.5179	-160.338	742.238	38.7566	-178.918	760.141	-36.8092	-145.386	730.415	-120.664
100	0.99	16.6297	1160.68	87.9364	88.7213	1157.73	132.088	-53.8968	1166.81	127.391	185.472	990.582	241.329	-148.074	980.085	247.784	9.91509	956.884	174.833	308.255	693.554	287.508	267.94	727.709	48.4811	202.826	743.679	62.9967	216.354	761.98	-11.6921	202.314	730.425	-100.705	-251.795	673.323	267.473	-225.77	727.698	20.5237	-160.371	742.279	38.7584	-178.95	760.068	-36.7114	-145.433	730.581	-120.819
101	1	16.5623	1160.73	87.7592	88.6916	1157.74	132.012	-53.9135	1166.85	127.281	185.465	990.614	241.296	-148.082	980.121	247.747	9.90604	956.922	174.785	308.242	693.595	287.529	267.932	727.752	48.4137	202.809	743.72	62.9614	216.283	762.009	-11.7632	202.276	730.502	-100.85	-251.798	673.363	267.499	-225.772	727.741	20.4853	-160.371	742.32	38.7052	-178.93	760.082	-36.7723	-145.438	730.62	-120.848
102	1.01	16.6065	1160.69	87.765	88.7035	1157.75	131.969	-53.8655	1166.85	127.266	185.503	990.615	241.313	-148.043	980.131	247.778	9.96172	956.937	174.803	308.247	693.581	287.536	267.977	727.768	48.4443	202.845	743.747	62.9528	216.316	761.99	-11.6897	202.352	730.477	-100.776	-251.792	673.397	267.519	-225.725	727.761	20.4717	-160.326	742.346	38.6867	-178.847	760.163	-36.8371	-145.383	730.572	-120.787
103	1.02	16.707	1160.63	87.8881	88.7839	1157.74	131.966	-53.8021	1166.82	127.302	185.561	990.589	241.31	-147.978	980.128	247.826	10.0312	956.954	174.769	308.273	693.508	287.455	268.043	727.773	48.4846	202.926	743.738	62.9824	216.443	761.946	-11.5636	202.473	730.423	-100.65	-251.772	673.446	267.565	-225.662	727.739	20.4825	-160.259	742.354	38.6809	-178.772	760.278	-36.9016	-145.295	730.583	-120.832
104	1.03	16.767	1160.58	87.8958	88.8627	1157.69	131.97	-53.7391	1166.77	127.321	185.616	990.541	241.27	-147.921	980.113	247.842	10.0937	956.926	174.74	308.302	693.421	287.368	268.107	727.764	48.5215	202.992	743.686	62.9837	216.564	761.87	-11.4943	202.584	730.358	-100.59	-251.757	673.456	267.581	-225.603	727.691	20.4863	-160.208	742.338	38.6524	-178.765	760.368	-37.019	-145.23	730.506	-120.786
105	1.04	16.7851	1160.54	87.9119	88.8944	1157.64	131.967	-53.733	1166.69	127.341	185.625	990.486	241.243	-147.904	980.077	247.832	10.1066	956.861	174.786	308.326	693.349	287.328	268.143	727.729	48.5748	203.023	743.629	62.9926	216.637	761.821	-11.4326	202.624	730.283	-100.505	-251.766	673.426	267.582	-225.58	727.642	20.494	-160.199	742.297	38.6875	-178.794	760.339	-36.9975	-145.221	730.374	-120.628
106	1.05	16.7417	1160.49	87.9863	88.8599	1157.58	132.007	-53.7801	1166.64	127.413	185.606	990.446	241.273	-147.94	980.041	247.848	10.0495	956.809	174.863	308.342	693.321	287.331	268.278	727.815	48.468	203.004	743.583	63.0421	216.64	761.806	-11.3947	202.605	730.19	-100.356	-251.805	673.376	267.563	-225.627	727.589	20.5403	-160.256	742.234	38.7699	-178.825	760.222	-36.8443	-145.263	730.314	-120.57
107	1.06	16.6667	1160.44	88.0302	88.7964	1157.54	131.987	-53.8452	1166.6	127.434	185.566	990.43	241.268	-147.984	980.026	247.843	9.97034	956.784	174.94	308.335	693.334	287.341	268.407	727.955	48.2459	202.95	743.56	63.0608	216.564	761.839	-11.4567	202.543	730.142	-100.303	-251.832	673.311	267.473	-225.69	727.561	20.5634	-160.329	742.194	38.8172	-178.871	760.085	-36.6572	-145.34	730.3	-120.543
108	1.07	16.6099	1160.43	87.947	88.7295	1157.56	131.854	-53.9129	1166.62	127.372	185.523	990.441	241.241	-148.022	980.039	247.822	9.92546	956.806	174.945	308.294	693.387	287.368	268.099	727.739	48.4491	202.894	743.598	62.9926	216.471	761.914	-11.5801	202.457	730.221	-100.446	-251.84	673.284	267.42	-225.729	727.581	20.5202	-160.379	742.174	38.8405	-178.889	760.036	-36.661	-145.394	730.323	-120.568
109	1.08	16.5629	1160.5	87.7923	88.6906	1157.59	131.754	-53.9381	1166.68	127.307	185.483	990.483	241.221	-148.067	980.079	247.808	9.89864	956.883	174.901	308.26	693.478	287.469	268.019	727.725	48.4654	202.867	743.664	62.9791	216.403	761.975	-11.6606	202.399	730.364	-100.615	-251.848	673.302	267.459	-225.75	727.647	20.5216	-160.379	742.217	38.8108	-178.892	760.056	-36.6873	-145.408	730.394	-120.613
110	1.09	16.5501	1160.58	87.6002	88.687	1157.61	131.653	-53.927	1166.78	127.184	185.467	990.522	241.187	-148.083	980.119	247.835	9.88622	956.991	174.775	308.249	693.538	287.52	268.002	727.77	48.4464	202.882	743.737	62.9715	216.368	762.012	-11.6947	202.389	730.51	-100.78	-251.837	673.349	267.526	-225.742	727.727	20.5051	-160.343	742.302	38.746	-178.867	760.157	-36.7855	-145.392	730.472	-120.644
111	1.1	16.5842	1160.59	87.4565	88.7005	1157.6	131.563	-53.8804	1166.82	127.083	185.478	990.541	241.136	-148.074	980.154	247.847	9.91142	957.063	174.635	308.258	693.539	287.485	268.016	727.807	48.4159	202.922	743.783	62.9512	216.365	762.022	-11.6908	202.415	730.585	-100.923	-251.789	673.398	267.565	-225.705	727.77	20.4414	-160.287	742.379	38.6477	-178.828	760.335	-37.0215	-145.358	730.553	-120.758
112	1.11	16.6018	1160.54	87.4312	88.724	1157.54	131.535	-53.8359	1166.81	127.051	185.488	990.534	241.117	-148.074	980.155	247.857	9.92921	957.067	174.637	308.281	693.512	287.426	268.037	727.804	48.4328	202.947	743.778	62.967	216.418	761.98	-11.6424	202.454	730.555	-100.9	-251.754	673.43	267.605	-225.661	727.771	20.4253	-160.248	742.394	38.6141	-178.797	760.402	-37.1089	-145.317	730.591	-120.829
113	1.12	16.6134	1160.44	87.4903	88.753	1157.44	131.556	-53.806	1166.77	127.07	185.504	990.49	241.114	-148.067	980.13	247.893	9.92622	957.007	174.762	308.316	693.466	287.366	268.061	727.766	48.4748	202.966	743.709	62.9895	216.502	761.89	-11.5462	202.511	730.426	-100.677	-251.75	673.405	267.575	-225.637	727.741	20.4461	-160.236	742.371	38.6481	-178.811	760.348	-37.0299	-145.282	730.478	-120.705
114	1.13	16.6169	1160.29	87.5582	88.7737	1157.3	131.585	-53.7912	1166.67	127.143	185.507	990.415	241.085	-148.07	980.082	247.909	9.87731	956.877	174.905	308.356	693.417	287.312	268.071	727.697	48.5385	202.945	743.606	63.0108	216.558	761.81	-11.4863	202.535	730.27	-100.502	-251.756	673.354	267.538	-225.639	727.664	20.459	-160.251	742.273	38.7163	-178.854	760.201	-36.8522	-145.273	730.416	-120.712
115	1.14	16.5855	1160.12	87.6563	88.7781	1157.18	131.616	-53.8212	1166.57	127.166	185.48	990.347	241.08	-148.093	980.016	247.946	9.82382	956.769	175.029	308.363	693.375	287.268	268.059	727.63	48.6215	202.922	743.516	63.0382	216.585	761.783	-11.4389	202.516	730.144	-100.386	-251.78	673.282	267.492	-225.665	727.592	20.4861	-160.297	742.187	38.7717	-178.891	760.065	-36.6884	-145.295	730.382	-120.732
116	1.15	16.5265	1160.04	87.6444	88.7491	1157.12	131.549	-53.8723	1166.53	127.197	185.446	990.324	241.084	-148.12	979.995	248.002	9.76322	956.745	175.103	308.358	693.373	287.308	268.021	727.603	48.6559	202.886	743.493	63.0605	216.573	761.797	-11.4304	202.462	730.116	-100.361	-251.799	673.221	267.491	-225.704	727.558	20.5128	-160.365	742.151	38.8241	-178.931	759.995	-36.5927	-145.366	730.303	-120.574
117	1.16	16.5047	1160.06	87.5184	88.7251	1157.14	131.448	-53.8851	1166.54	127.149	185.429	990.345	241.084	-148.136	980.013	248.028	9.74666	956.779	175.095	308.34	693.417	287.359	267.999	727.612	48.6053	202.866	743.549	63.0329	216.533	761.84	-11.4612	202.407	730.207	-100.487	-251.798	673.201	267.498	-225.737	727.591	20.5229	-160.39	742.166	38.8305	-178.935	760.007	-36.6383	-145.408	730.317	-120.526
118	1.17	16.5404	1160.16	87.2899	88.7372	1157.17	131.321	-53.8578	1166.61	127.047	185.433	990.396	241.069	-148.117	980.062	248.046	9.77274	956.881	174.966	308.31	693.458	287.373	268.012	727.693	48.5279	202.891	743.656	62.9842	216.469	761.899	-11.5465	202.398	730.368	-100.669	-251.782	673.216	267.501	-225.731	727.668	20.5045	-160.348	742.252	38.7607	-178.906	760.185	-36.839	-145.406	730.381	-120.562
119	1.18	16.6033	1160.26	87.08	88.7825	1157.22	131.231	-53.8053	1166.66	126.982	185.442	990.454	241.057	-148.098	980.129	248.056	9.81975	957.007	174.793	308.286	693.506	287.428	268.031	727.785	48.4491	202.935	743.777	62.9553	216.443	761.956	-11.6237	202.443	730.52	-100.806	-251.763	673.271	267.533	-225.693	727.738	20.494	-160.303	742.324	38.7296	-178.842	760.39	-36.9749	-145.367	730.454	-120.597
120	1.19	16.65	1160.26	86.9902	88.83	1157.22	131.171	-53.7567	1166.69	126.947	185.463	990.472	241.052	-148.081	980.157	248.071	9.87824	957.049	174.736	308.28	693.512	287.431	268.056	727.831	48.4336	202.99	743.807	62.9668	216.488	761.961	-11.615	202.494	730.561	-100.827	-251.76	673.333	267.589	-225.656	727.756	20.4838	-160.266	742.353	38.6864	-178.787	760.452	-37.0077	-145.325	730.492	-120.625
121	1.2	16.6784	1160.2	87.0199	88.8633	1157.17	131.175	-53.7293	1166.67	126.919	185.475	990.454	241.056	-148.068	980.149	248.082	9.90341	957.015	174.788	308.285	693.503	287.443	268.072	727.809	48.4604	203	743.768	62.9853	216.518	761.929	-11.5705	202.526	730.5	-100.784	-251.777	673.351	267.608	-225.624	727.746	20.4636	-160.234	742.338	38.6657	-178.762	760.4	-36.9918	-145.29	730.52	-120.713
122	1.21	16.6507	1160.11	87.1051	88.8649	1157.12	131.214	-53.7329	1166.63	126.923	185.488	990.416	241.062	-148.073	980.114	248.078	9.87353	956.912	174.914	308.306	693.472	287.411	268.057	727.754	48.5089	202.968	743.71	62.9977	216.518	761.903	-11.5236	202.523	730.401	-100.685	-251.788	673.344	267.594	-225.635	727.713	20.4829	-160.253	742.321	38.7015	-178.78	760.245	-36.8231	-145.276	730.547	-120.797
123	1.22	16.5743	1159.99	87.2057	88.8263	1157.05	131.23	-53.7819	1166.56	126.935	185.472	990.369	241.069	-148.088	980.07	248.082	9.80608	956.801	175.061	308.318	693.443	287.386	268.024	727.686	48.5353	202.928	743.63	63.0261	216.503	761.891	-11.5109	202.48	730.28	-100.559	-251.803	673.305	267.577	-225.683	727.661	20.5078	-160.311	742.264	38.7606	-178.838	760.047	-36.592	-145.306	730.468	-120.706
124	1.23	16.5274	1159.92	87.2803	88.8044	1157	131.25	-53.817	1166.52	126.94	185.466	990.334	241.053	-148.099	980.045	248.042	9.76063	956.737	175.124	308.316	693.413	287.345	268.143	727.769	48.4168	202.891	743.578	63.035	216.501	761.89	-11.503	202.442	730.175	-100.442	-251.818	673.259	267.502	-225.729	727.61	20.5164	-160.356	742.203	38.7844	-178.894	759.949	-36.4975	-145.357	730.39	-120.626
125	1.24	16.5265	1159.9	87.2536	88.7911	1157.01	131.202	-53.8279	1166.5	126.947	185.473	990.311	241.036	-148.092	980.036	248.023	9.75608	956.749	175.087	308.319	693.374	287.317	268.337	727.921	48.2067	202.881	743.566	63.0114	216.493	761.897	-11.5361	202.431	730.177	-100.473	-251.824	673.24	267.462	-225.733	727.603	20.4988	-160.377	742.185	38.7715	-178.925	759.982	-36.6177	-145.376	730.408	-120.687
126	1.25	16.5545	1159.94	87.1581	88.8065	1157.03	131.185	-53.8141	1166.5	126.944	185.492	990.293	241.017	-148.069	980.044	248.02	9.78412	956.785	175.025	308.32	693.336	287.324	268.108	727.71	48.4674	202.887	743.599	62.9873	216.482	761.879	-11.554	202.432	730.241	-100.532	-251.811	673.25	267.498	-225.725	727.61	20.4977	-160.363	742.213	38.7775	-178.927	760.104	-36.7897	-145.386	730.352	-120.58
127	1.26	16.6104	1160.04	87.1067	88.8464	1157.08	131.19	-53.791	1166.52	126.935	185.516	990.297	241.019	-148.037	980.07	248.008	9.83973	956.863	174.921	308.312	693.314	287.351	268.077	727.707	48.5389	202.92	743.654	62.9952	216.494	761.864	-11.5224	202.466	730.327	-100.593	-251.795	673.298	267.56	-225.718	727.639	20.5465	-160.341	742.255	38.7783	-178.882	760.305	-37.0075	-145.384	730.366	-120.563
128	1.27	16.6554	1160.13	87.0413	88.8829	1157.14	131.163	-53.7713	1166.57	126.938	185.531	990.332	241.005	-148.015	980.123	248	9.88605	956.978	174.821	308.295	693.335	287.379	268.088	727.758	48.531	202.959	743.709	62.991	216.492	761.878	-11.5277	202.497	730.412	-100.641	-251.794	673.388	267.616	-225.687	727.687	20.5527	-160.322	742.31	38.7637	-178.827	760.447	-37.1286	-145.373	730.414	-120.582
129	1.28	16.687	1160.17	87.0464	88.8909	1157.18	131.151	-53.7456	1166.61	126.877	185.535	990.373	240.989	-148.004	980.172	247.955	9.931	957.032	174.783	308.271	693.362	287.374	268.071	727.789	48.5047	202.978	743.741	62.9893	216.498	761.898	-11.5369	202.52	730.465	-100.712	-251.79	673.45	267.642	-225.654	727.715	20.5089	-160.296	742.342	38.7193	-178.788	760.481	-37.1497	-145.34	730.446	-120.604
130	1.29	16.7052	1160.17	87.0554	88.8787	1157.17	131.168	-53.7232	1166.62	126.867	185.537	990.371	240.974	-148.001	980.177	247.914	9.95478	956.993	174.84	308.268	693.385	287.415	268.046	727.78	48.4672	202.969	743.72	62.9819	216.54	761.906	-11.5147	202.521	730.44	-100.711	-251.792	673.468	267.609	-225.64	727.718	20.474	-160.265	742.333	38.6969	-178.807	760.374	-37.027	-145.306	730.446	-120.633
131	1.3	16.6853	1160.13	87.1445	88.8772	1157.15	131.204	-53.7179	1166.62	126.883	185.538	990.344	240.986	-147.993	980.155	247.918	9.93231	956.91	174.939	308.283	693.386	287.402	268.028	727.737	48.4398	202.949	743.678	63.0007	216.561	761.91	-11.5328	202.491	730.367	-100.664	-251.824	673.406	267.509	-225.652	727.688	20.4692	-160.275	742.295	38.6911	-178.847	760.163	-36.8062	-145.293	730.42	-120.644
132	1.31	16.635	1160.08	87.2144	88.8488	1157.12	131.208	-53.7284	1166.61	126.896	185.54	990.303	240.982	-147.993	980.124	247.909	9.89418	956.853	175.015	308.289	693.377	287.383	268.153	727.804	48.266	202.918	743.626	63.0212	216.511	761.915	-11.5863	202.443	730.308	-100.63	-251.858	673.374	267.48	-225.674	727.667	20.4538	-160.31	742.261	38.6981	-178.867	759.997	-36.6471	-145.311	730.389	-120.647
133	1.32	16.6037	1160.06	87.2879	88.8219	1157.12	131.194	-53.7334	1166.61	126.947	185.561	990.281	241.013	-147.991	980.118	247.905	9.85957	956.827	175.064	308.297	693.365	287.409	268.318	727.937	48.0827	202.887	743.603	63.0234	216.453	761.906	-11.6077	202.41	730.278	-100.595	-251.847	673.368	267.486	-225.703	727.661	20.4704	-160.34	742.244	38.7089	-178.867	759.938	-36.5947	-145.336	730.398	-120.661
134	1.33	16.6242	1160.09	87.3313	88.8326	1157.15	131.196	-53.7201	1166.62	127.02	185.577	990.279	241.026	-147.971	980.125	247.915	9.86399	956.84	175.044	308.325	693.328	287.389	268.083	727.715	48.4362	202.89	743.604	63.0179	216.451	761.908	-11.5789	202.412	730.285	-100.565	-251.794	673.382	267.508	-225.706	727.663	20.5053	-160.33	742.257	38.7435	-178.893	760.013	-36.6426	-145.342	730.457	-120.718
135	1.34	16.7061	1160.18	87.2563	88.9001	1157.17	131.233	-53.6787	1166.64	127.046	185.605	990.28	241.027	-147.933	980.132	247.913	9.91788	956.903	174.902	308.338	693.283	287.367	268.085	727.692	48.5582	202.941	743.642	63.0228	216.501	761.891	-11.5336	202.481	730.319	-100.533	-251.757	673.392	267.546	-225.683	727.67	20.521	-160.28	742.284	38.7466	-178.842	760.183	-36.8274	-145.332	730.4	-120.61
136	1.35	16.8014	1160.26	87.2126	88.9857	1157.19	131.248	-53.6263	1166.66	127.067	185.632	990.273	241.007	-147.9	980.142	247.935	9.98038	956.957	174.76	308.34	693.233	287.328	268.131	727.72	48.5793	202.993	743.702	62.9806	216.57	761.863	-11.497	202.566	730.376	-100.601	-251.739	673.408	267.574	-225.649	727.682	20.5058	-160.243	742.306	38.7036	-178.783	760.368	-36.9929	-145.301	730.38	-120.583
137	1.36	16.8477	1160.29	87.2164	89.021	1157.21	131.259	-53.5905	1166.68	127.11	185.632	990.257	241.008	-147.897	980.155	247.967	10.0201	956.97	174.708	308.325	693.22	287.354	268.157	727.744	48.586	203.023	743.718	62.9771	216.603	761.859	-11.4609	202.604	730.404	-100.632	-251.747	673.441	267.627	-225.637	727.685	20.5124	-160.239	742.303	38.7261	-178.771	760.452	-37.0681	-145.29	730.385	-120.599
138	1.37	16.8585	1160.29	87.2966	89.0211	1157.21	131.293	-53.603	1166.69	127.137	185.618	990.263	241.021	-147.927	980.169	247.991	9.99944	956.928	174.755	308.319	693.243	287.364	268.117	727.755	48.5502	203.01	743.703	62.9925	216.572	761.879	-11.4673	202.575	730.39	-100.617	-251.772	673.452	267.629	-225.65	727.677	20.5451	-160.264	742.298	38.7468	-178.772	760.4	-36.9734	-145.306	730.433	-120.688
139	1.38	16.8033	1160.27	87.3051	88.9849	1157.18	131.289	-53.6338	1166.69	127.149	185.591	990.282	241.013	-147.984	980.164	247.988	9.92857	956.829	174.86	308.318	693.278	287.338	268.032	727.746	48.4652	202.955	743.668	62.9766	216.491	761.901	-11.52	202.486	730.356	-100.626	-251.816	673.427	267.579	-225.684	727.666	20.5483	-160.304	742.267	38.7694	-178.811	760.228	-36.7961	-145.345	730.479	-120.757
140	1.39	16.7545	1160.19	87.4184	88.945	1157.13	131.294	-53.6396	1166.69	127.163	185.553	990.263	240.998	-148.038	980.152	247.995	9.86841	956.715	174.943	308.301	693.315	287.328	267.966	727.712	48.439	202.896	743.609	63.0081	216.43	761.904	-11.5645	202.422	730.283	-100.564	-251.852	673.398	267.514	-225.715	727.639	20.5168	-160.363	742.224	38.783	-178.875	760.066	-36.6933	-145.374	730.431	-120.692
141	1.4	16.7469	1160.15	87.4885	88.9221	1157.1	131.28	-53.6354	1166.71	127.128	185.532	990.26	241.015	-148.063	980.138	248.019	9.82874	956.661	174.998	308.316	693.346	287.348	267.948	727.678	48.4671	202.861	743.588	63.0117	216.424	761.9	-11.5813	202.391	730.233	-100.522	-251.855	673.37	267.501	-225.727	727.634	20.501	-160.375	742.212	38.7755	-178.908	759.995	-36.6846	-145.37	730.497	-120.801
142	1.41	16.7783	1160.17	87.4407	88.9473	1157.1	131.296	-53.6056	1166.74	127.095	185.546	990.263	241.026	-148.046	980.135	248.038	9.82062	956.685	174.932	308.336	693.343	287.364	267.973	727.654	48.502	202.878	743.606	62.968	216.446	761.898	-11.5866	202.402	730.255	-100.566	-251.822	673.363	267.531	-225.703	727.651	20.512	-160.355	742.228	38.7463	-178.904	760.022	-36.7019	-145.35	730.53	-120.85
143	1.42	16.8591	1160.21	87.3746	89.0041	1157.11	131.328	-53.5545	1166.74	127.132	185.59	990.258	241.032	-148.003	980.133	248.056	9.86406	956.741	174.847	308.344	693.294	287.344	268.033	727.662	48.5599	202.921	743.615	62.964	216.506	761.877	-11.5386	202.433	730.287	-100.596	-251.778	673.351	267.534	-225.664	727.66	20.4968	-160.309	742.281	38.7079	-178.871	760.155	-36.8512	-145.328	730.514	-120.82
144	1.43	16.9282	1160.26	87.373	89.0653	1157.11	131.402	-53.5037	1166.76	127.134	185.615	990.284	241.039	-147.973	980.145	248.091	9.89506	956.823	174.783	308.358	693.274	287.352	268.088	727.695	48.6004	202.964	743.662	62.9973	216.549	761.853	-11.4691	202.497	730.336	-100.582	-251.738	673.373	267.563	-225.637	727.685	20.4906	-160.274	742.32	38.6996	-178.843	760.329	-37.0085	-145.313	730.447	-120.67
145	1.44	16.9609	1160.29	87.3631	89.086	1157.15	131.414	-53.4932	1166.78	127.099	185.617	990.312	241.053	-147.975	980.165	248.1	9.91866	956.883	174.743	308.366	693.277	287.353	268.095	727.73	48.6176	202.974	743.716	62.9967	216.559	761.855	-11.4653	202.523	730.403	-100.643	-251.725	673.383	267.582	-225.631	727.709	20.5145	-160.269	742.34	38.7005	-178.84	760.417	-37.049	-145.316	730.431	-120.614
146	1.45	16.9639	1160.31	87.3418	89.0717	1157.18	131.407	-53.5148	1166.78	127.082	185.597	990.328	241.076	-147.997	980.178	248.114	9.91582	956.891	174.767	308.33	693.291	287.33	268.078	727.751	48.5814	202.967	743.736	62.9941	216.518	761.893	-11.5411	202.493	730.449	-100.734	-251.74	673.372	267.552	-225.655	727.703	20.5035	-160.281	742.338	38.7304	-178.84	760.389	-36.9979	-145.339	730.435	-120.631
147	1.46	16.9485	1160.29	87.3325	89.0469	1157.18	131.411	-53.5343	1166.75	127.072	185.561	990.33	241.09	-148.029	980.152	248.107	9.89998	956.84	174.82	308.294	693.314	287.369	268.055	727.749	48.5328	202.949	743.717	63.0091	216.51	761.927	-11.584	202.477	730.429	-100.715	-251.788	673.353	267.543	-225.678	727.701	20.5009	-160.29	742.301	38.7525	-178.823	760.246	-36.8146	-145.363	730.438	-120.624
148	1.47	16.9183	1160.24	87.4044	89.0292	1157.13	131.464	-53.5558	1166.74	127.084	185.527	990.318	241.109	-148.056	980.14	248.127	9.88293	956.763	174.91	308.272	693.331	287.386	268.023	727.735	48.5216	202.931	743.68	63.0307	216.486	761.958	-11.6052	202.462	730.381	-100.652	-251.816	673.333	267.547	-225.701	727.686	20.4952	-160.315	742.255	38.7746	-178.831	760.098	-36.6559	-145.369	730.422	-120.603
149	1.48	16.8858	1160.18	87.4895	89.0089	1157.1	131.507	-53.5777	1166.7	127.144	185.516	990.302	241.116	-148.067	980.134	248.139	9.86733	956.712	174.981	308.26	693.333	287.368	267.999	727.704	48.5259	202.92	743.636	63.057	216.486	761.943	-11.6065	202.46	730.341	-100.614	-251.833	673.325	267.526	-225.701	727.663	20.5048	-160.33	742.227	38.7586	-178.842	759.991	-36.5283	-145.358	730.395	-120.58
150	1.49	16.87	1160.17	87.5033	89.0045	1157.08	131.531	-53.5826	1166.69	127.194	185.526	990.293	241.119	-148.06	980.119	248.155	9.86365	956.7	174.98	308.263	693.316	287.349	268.01	727.689	48.5385	202.931	743.623	63.052	216.495	761.916	-11.5692	202.475	730.306	-100.573	-251.826	673.331	267.517	-225.685	727.675	20.517	-160.3	742.233	38.7393	-178.839	759.977	-36.5053	-145.329	730.386	-120.598
151	1.5	16.8808	1160.18	87.4698	89.022	1157.08	131.569	-53.5603	1166.71	127.203	185.573	990.289	241.143	-148.033	980.123	248.177	9.87863	956.732	174.929	308.298	693.285	287.335	268.061	727.705	48.5367	202.964	743.62	63.0528	216.524	761.88	-11.5349	202.508	730.288	-100.542	-251.774	673.332	267.514	-225.63	727.683	20.5078	-160.265	742.275	38.7256	-178.803	760.098	-36.6445	-145.282	730.419	-120.662
152	1.51	16.8844	1160.2	87.5184	89.0316	1157.1	131.601	-53.5543	1166.73	127.215	185.61	990.276	241.181	-148.001	980.129	248.185	9.91002	956.763	174.892	308.325	693.229	287.308	268.109	727.717	48.5776	202.981	743.64	63.0333	216.57	761.852	-11.4603	202.547	730.297	-100.52	-251.727	673.355	267.538	-225.592	727.697	20.4827	-160.228	742.307	38.7093	-178.772	760.245	-36.7923	-145.254	730.511	-120.77
153	1.52	16.8467	1160.23	87.5753	89.0003	1157.14	131.597	-53.5739	1166.74	127.267	185.608	990.271	241.222	-147.986	980.12	248.213	9.91805	956.795	174.858	308.334	693.194	287.317	268.122	727.724	48.6207	202.998	743.654	63.0207	216.563	761.84	-11.4487	202.551	730.34	-100.544	-251.713	673.381	267.608	-225.605	727.698	20.5036	-160.232	742.317	38.7028	-178.768	760.349	-36.8994	-145.277	730.517	-120.746
154	1.53	16.7954	1160.27	87.5739	88.9364	1157.2	131.538	-53.6312	1166.76	127.258	185.605	990.279	241.238	-148.007	980.122	248.222	9.90043	956.813	174.837	308.32	693.183	287.331	268.091	727.724	48.6007	202.978	743.674	63.0075	216.521	761.872	-11.461	202.509	730.399	-100.619	-251.707	673.368	267.639	-225.633	727.7	20.522	-160.236	742.328	38.6938	-178.788	760.404	-36.9922	-145.321	730.454	-120.634
155	1.54	16.7199	1160.3	87.574	88.8681	1157.24	131.496	-53.6865	1166.76	127.3	185.578	990.272	241.227	-148.036	980.115	248.21	9.8568	956.788	174.863	308.276	693.212	287.37	268.051	727.713	48.5529	202.928	743.687	63.0093	216.469	761.921	-11.5446	202.457	730.402	-100.665	-251.743	673.324	267.615	-225.663	727.7	20.5191	-160.286	742.291	38.7548	-178.848	760.345	-36.9538	-145.353	730.432	-120.604
156	1.55	16.6218	1160.28	87.5969	88.7892	1157.24	131.47	-53.7749	1166.75	127.332	185.519	990.268	241.216	-148.076	980.108	248.188	9.80817	956.732	174.913	308.222	693.264	287.413	267.992	727.694	48.5228	202.873	743.678	63.0211	216.427	761.964	-11.6212	202.395	730.397	-100.676	-251.811	673.287	267.54	-225.723	727.688	20.5238	-160.364	742.239	38.8159	-178.915	760.194	-36.7874	-145.405	730.421	-120.608
157	1.56	16.5147	1160.29	87.5946	88.7141	1157.26	131.42	-53.8687	1166.73	127.366	185.464	990.275	241.192	-148.129	980.113	248.172	9.77407	956.686	174.95	308.174	693.311	287.443	267.946	727.695	48.4719	202.829	743.663	62.9919	216.374	762.004	-11.6778	202.351	730.383	-100.66	-251.872	673.266	267.488	-225.766	727.673	20.5231	-160.423	742.21	38.8046	-178.925	760.055	-36.6645	-145.444	730.418	-120.605
158	1.57	16.4693	1160.28	87.6839	88.6911	1157.26	131.451	-53.8835	1166.73	127.39	185.455	990.277	241.159	-148.158	980.114	248.16	9.77096	956.651	175	308.158	693.307	287.432	267.929	727.706	48.438	202.839	743.638	62.9888	216.353	761.977	-11.7094	202.362	730.345	-100.635	-251.883	673.279	267.476	-225.763	727.659	20.4983	-160.407	742.21	38.8045	-178.911	759.99	-36.6241	-145.445	730.392	-120.598
159	1.58	16.4896	1160.29	87.774	88.7208	1157.26	131.547	-53.8449	1166.74	127.466	185.492	990.267	241.164	-148.135	980.106	248.203	9.79662	956.641	175.023	308.181	693.27	287.417	267.958	727.714	48.4816	202.881	743.614	63.0257	216.416	761.909	-11.5807	202.418	730.284	-100.564	-251.855	673.301	267.5	-225.709	727.644	20.4932	-160.355	742.23	38.8067	-178.883	760.042	-36.7027	-145.403	730.369	-120.566
160	1.59	16.5565	1160.31	87.8445	88.7798	1157.25	131.673	-53.7865	1166.76	127.51	185.541	990.271	241.174	-148.087	980.102	248.238	9.84132	956.69	174.958	308.221	693.228	287.397	268.024	727.741	48.5249	202.934	743.609	63.0447	216.508	761.843	-11.4572	202.508	730.263	-100.479	-251.821	673.351	267.57	-225.645	727.665	20.521	-160.281	742.279	38.7696	-178.823	760.214	-36.8707	-145.334	730.377	-120.566
161	1.6	16.617	1160.35	87.8269	88.8245	1157.26	131.706	-53.7261	1166.79	127.468	185.593	990.288	241.148	-148.025	980.11	248.246	9.90365	956.744	174.874	308.253	693.202	287.325	268.103	727.754	48.548	202.982	743.638	63.0169	216.587	761.816	-11.4283	202.587	730.304	-100.5	-251.776	673.383	267.595	-225.585	727.704	20.4804	-160.204	742.326	38.6752	-178.794	760.377	-37.0477	-145.25	730.436	-120.654
162	1.61	16.6556	1160.39	87.7954	88.8431	1157.3	131.69	-53.7106	1166.84	127.446	185.62	990.31	241.141	-147.975	980.127	248.241	9.93631	956.803	174.821	308.29	693.202	287.293	268.143	727.746	48.5969	203.021	743.676	63.001	216.621	761.821	-11.4708	202.609	730.38	-100.586	-251.737	673.39	267.608	-225.562	727.732	20.4534	-160.167	742.356	38.6514	-178.783	760.432	-37.0775	-145.198	730.548	-120.816
163	1.62	16.6373	1160.4	87.8227	88.8181	1157.33	131.732	-53.7407	1166.86	127.452	185.617	990.314	241.139	-147.979	980.122	248.256	9.9139	956.801	174.862	308.289	693.236	287.326	268.136	727.733	48.6171	203.013	743.671	63.0603	216.611	761.871	-11.5018	202.595	730.385	-100.6	-251.736	673.363	267.604	-225.593	727.729	20.4844	-160.195	742.351	38.7046	-178.781	760.341	-36.8862	-145.216	730.588	-120.844
164	1.63	16.5495	1160.41	87.7997	88.7491	1157.34	131.721	-53.8096	1166.87	127.45	185.569	990.305	241.15	-148.031	980.101	248.27	9.85455	956.755	174.925	308.264	693.287	287.395	268.092	727.698	48.6113	202.961	743.677	63.056	216.546	761.938	-11.5686	202.517	730.383	-100.647	-251.776	673.305	267.589	-225.646	727.722	20.5004	-160.26	742.312	38.757	-178.828	760.19	-36.711	-145.271	730.599	-120.846
165	1.64	16.4468	1160.4	87.7749	88.6764	1157.35	131.703	-53.9063	1166.86	127.463	185.5	990.298	241.168	-148.106	980.087	248.278	9.78747	956.703	174.963	308.238	693.341	287.407	268.014	727.675	48.5806	202.883	743.682	63.0365	216.44	761.989	-11.6486	202.417	730.391	-100.666	-251.831	673.236	267.525	-225.725	727.719	20.4811	-160.35	742.258	38.783	-178.878	760.054	-36.5485	-145.356	730.569	-120.815
166	1.65	16.3969	1160.39	87.8697	88.6146	1157.37	131.687	-53.9611	1166.85	127.508	185.44	990.305	241.176	-148.157	980.067	248.288	9.73839	956.672	175.041	308.236	693.384	287.423	267.96	727.677	48.5602	202.842	743.669	63.0222	216.378	761.987	-11.6671	202.356	730.38	-100.636	-251.849	673.207	267.516	-225.772	727.699	20.4994	-160.4	742.226	38.801	-178.887	759.972	-36.4516	-145.428	730.461	-120.633
167	1.66	16.401	1160.4	87.9017	88.6194	1157.37	131.693	-53.9489	1166.83	127.55	185.432	990.336	241.168	-148.173	980.07	248.28	9.73619	956.664	175.051	308.243	693.409	287.436	267.946	727.71	48.5071	202.858	743.664	63.0218	216.378	761.952	-11.6309	202.361	730.354	-100.608	-251.836	673.239	267.53	-225.744	727.674	20.5272	-160.392	742.222	38.8167	-178.87	760.012	-36.5408	-145.438	730.414	-120.568
168	1.67	16.477	1160.42	87.8482	88.676	1157.37	131.694	-53.8809	1166.83	127.511	185.457	990.359	241.126	-148.148	980.087	248.241	9.7793	956.682	174.947	308.259	693.417	287.413	267.99	727.755	48.4799	202.894	743.679	62.9931	216.429	761.921	-11.5747	202.448	730.343	-100.605	-251.808	673.297	267.568	-225.683	727.675	20.4997	-160.327	742.25	38.7628	-178.839	760.178	-36.7764	-145.379	730.401	-120.587
169	1.68	16.577	1160.43	87.8332	88.7583	1157.37	131.718	-53.813	1166.84	127.486	185.488	990.358	241.091	-148.109	980.086	248.202	9.83667	956.711	174.848	308.286	693.388	287.386	268.053	727.793	48.4688	202.957	743.688	62.9699	216.492	761.857	-11.5175	202.535	730.35	-100.623	-251.771	673.331	267.613	-225.629	727.685	20.4757	-160.263	742.289	38.6829	-178.815	760.365	-37.0686	-145.321	730.416	-120.644
170	1.69	16.6131	1160.43	87.8278	88.7856	1157.37	131.739	-53.7906	1166.84	127.47	185.502	990.338	241.098	-148.086	980.079	248.193	9.84809	956.722	174.804	308.32	693.331	287.34	268.092	727.79	48.5069	202.986	743.68	62.9648	216.535	761.839	-11.4864	202.555	730.358	-100.627	-251.73	673.327	267.666	-225.591	727.685	20.4916	-160.229	742.304	38.6615	-178.817	760.456	-37.1639	-145.289	730.456	-120.687
171	1.7	16.5878	1160.41	87.8417	88.7636	1157.36	131.745	-53.808	1166.83	127.478	185.509	990.33	241.123	-148.086	980.05	248.185	9.82445	956.688	174.847	308.348	693.31	287.311	268.081	727.746	48.5384	202.967	743.655	62.9845	216.541	761.834	-11.4985	202.539	730.301	-100.548	-251.722	673.285	267.664	-225.604	727.682	20.5084	-160.241	742.294	38.7032	-178.847	760.395	-37.1025	-145.288	730.522	-120.808
172	1.71	16.5325	1160.35	87.8934	88.7092	1157.32	131.737	-53.8415	1166.8	127.476	185.49	990.313	241.124	-148.114	980.01	248.158	9.77315	956.62	174.944	308.371	693.322	287.31	268.036	727.699	48.5597	202.924	743.609	63.0006	216.502	761.845	-11.5056	202.484	730.254	-100.502	-251.735	673.214	267.601	-225.633	727.662	20.5121	-160.3	742.267	38.7451	-178.884	760.213	-36.9178	-145.325	730.498	-120.762
173	1.72	16.4633	1160.31	87.9001	88.6407	1157.3	131.694	-53.9047	1166.76	127.458	185.461	990.316	241.124	-148.147	980.005	248.14	9.71149	956.586	175.008	308.35	693.371	287.333	268.149	727.81	48.4464	202.856	743.608	62.9919	216.458	761.908	-11.5341	202.406	730.247	-100.486	-251.753	673.15	267.511	-225.7	727.655	20.5125	-160.366	742.214	38.8025	-178.928	760.059	-36.6866	-145.386	730.453	-120.684
174	1.73	16.403	1160.32	87.8005	88.5835	1157.3	131.63	-53.9528	1166.76	127.402	185.427	990.334	241.127	-148.177	980.018	248.125	9.68841	956.611	174.999	308.3	693.418	287.391	268.305	727.996	48.1969	202.826	743.632	63.0068	216.406	761.98	-11.6235	202.354	730.299	-100.549	-251.775	673.142	267.5	-225.751	727.684	20.5238	-160.396	742.206	38.8205	-178.962	759.989	-36.5455	-145.425	730.494	-120.701
175	1.74	16.4112	1160.36	87.6253	88.588	1157.32	131.569	-53.9537	1166.78	127.33	185.407	990.351	241.089	-148.179	980.028	248.119	9.71692	956.642	174.933	308.258	693.437	287.436	268.051	727.798	48.4069	202.848	743.674	62.997	216.394	761.998	-11.6747	202.372	730.378	-100.628	-251.785	673.144	267.503	-225.754	727.697	20.509	-160.371	742.232	38.7907	-178.943	760.027	-36.6115	-145.414	730.465	-120.631
176	1.75	16.469	1160.4	87.5357	88.6483	1157.35	131.521	-53.9264	1166.79	127.267	185.42	990.352	241.074	-148.16	980.047	248.121	9.77808	956.688	174.851	308.214	693.437	287.468	268.034	727.768	48.4603	202.898	743.714	62.9832	216.425	762.007	-11.6659	202.441	730.44	-100.713	-251.785	673.184	267.554	-225.723	727.708	20.4838	-160.323	742.27	38.7445	-178.867	760.159	-36.7732	-145.376	730.452	-120.64
177	1.76	16.5393	1160.42	87.5223	88.6927	1157.36	131.504	-53.8679	1166.78	127.261	185.456	990.38	241.094	-148.131	980.088	248.139	9.85238	956.746	174.795	308.211	693.424	287.444	268.06	727.796	48.5014	202.969	743.741	63.0058	216.485	761.979	-11.5873	202.52	730.472	-100.72	-251.772	673.247	267.591	-225.665	727.727	20.5028	-160.27	742.322	38.7317	-178.776	760.298	-36.8819	-145.327	730.452	-120.617
178	1.77	16.5784	1160.4	87.5143	88.751	1157.34	131.504	-53.8426	1166.79	127.201	185.499	990.389	241.086	-148.093	980.102	248.121	9.89832	956.778	174.76	308.251	693.39	287.374	268.097	727.82	48.4863	203.022	743.745	63.01	216.543	761.925	-11.527	202.582	730.484	-100.727	-251.738	673.305	267.59	-225.626	727.747	20.4762	-160.233	742.342	38.6965	-178.733	760.394	-36.9429	-145.294	730.451	-120.615
179	1.78	16.5733	1160.35	87.5264	88.7872	1157.29	131.519	-53.8254	1166.78	127.165	185.525	990.365	241.051	-148.056	980.095	248.113	9.90324	956.75	174.79	308.271	693.344	287.323	268.125	727.795	48.5049	203.042	743.7	63.0251	216.586	761.873	-11.4858	202.613	730.426	-100.644	-251.731	673.315	267.59	-225.599	727.726	20.4601	-160.216	742.329	38.673	-178.727	760.392	-36.9326	-145.261	730.427	-120.627
180	1.79	16.5463	1160.25	87.5982	88.7698	1157.22	131.544	-53.8265	1166.74	127.191	185.532	990.309	241.061	-148.047	980.063	248.141	9.89275	956.679	174.888	308.28	693.308	287.335	268.112	727.742	48.5662	203.01	743.639	63.0509	216.588	761.856	-11.4835	202.594	730.318	-100.521	-251.749	673.279	267.59	-225.604	727.671	20.5127	-160.225	742.296	38.7232	-178.766	760.261	-36.8135	-145.257	730.435	-120.688
181	1.8	16.4826	1160.17	87.6633	88.7035	1157.17	131.535	-53.8653	1166.7	127.235	185.518	990.257	241.093	-148.061	980.024	248.143	9.82613	956.622	174.967	308.28	693.267	287.334	268.074	727.665	48.6029	202.948	743.585	63.0643	216.569	761.862	-11.4936	202.533	730.225	-100.462	-251.762	673.229	267.59	-225.641	727.635	20.5485	-160.274	742.251	38.7517	-178.859	760.082	-36.6365	-145.266	730.453	-120.702
182	1.81	16.3968	1160.14	87.6246	88.6454	1157.17	131.483	-53.9265	1166.66	127.259	185.499	990.232	241.103	-148.094	980.007	248.124	9.77699	956.596	175.004	308.271	693.26	287.345	268.173	727.747	48.4209	202.89	743.573	63.0486	216.533	761.867	-11.5269	202.458	730.207	-100.484	-251.78	673.2	267.558	-225.674	727.63	20.5088	-160.331	742.222	38.7662	-178.919	760	-36.577	-145.338	730.392	-120.632
183	1.82	16.3297	1160.16	87.5529	88.6132	1157.19	131.442	-53.9756	1166.67	127.232	185.479	990.255	241.09	-148.122	980.032	248.121	9.7438	956.616	175.007	308.255	693.294	287.392	268.336	727.932	48.2036	202.858	743.603	63.0388	216.447	761.898	-11.592	202.394	730.269	-100.554	-251.792	673.21	267.551	-225.71	727.65	20.4938	-160.358	742.234	38.7875	-178.919	760.012	-36.5788	-145.393	730.398	-120.604
184	1.83	16.3112	1160.23	87.4541	88.6087	1157.22	131.393	-53.9896	1166.71	127.21	185.464	990.302	241.057	-148.12	980.076	248.121	9.74035	956.67	174.961	308.239	693.338	287.422	268.075	727.761	48.4495	202.866	743.651	63.0322	216.416	761.935	-11.5869	202.378	730.348	-100.655	-251.787	673.258	267.542	-225.713	727.681	20.5103	-160.355	742.269	38.7807	-178.918	760.128	-36.7371	-145.407	730.418	-120.568
185	1.84	16.3517	1160.3	87.3271	88.6278	1157.26	131.299	-53.963	1166.73	127.155	185.472	990.322	241.02	-148.103	980.1	248.099	9.75823	956.725	174.881	308.212	693.363	287.451	268.024	727.768	48.4564	202.884	743.697	62.986	216.443	761.942	-11.5536	202.399	730.419	-100.747	-251.781	673.322	267.582	-225.703	727.708	20.4941	-160.325	742.297	38.7472	-178.901	760.283	-36.9543	-145.402	730.445	-120.608
186	1.85	16.4133	1160.34	87.2496	88.6498	1157.29	131.234	-53.9199	1166.73	127.105	185.476	990.309	240.976	-148.092	980.102	248.073	9.7971	956.77	174.745	308.192	693.346	287.444	268.027	727.787	48.4219	202.929	743.736	62.947	216.435	761.943	-11.5877	202.448	730.465	-100.826	-251.794	673.345	267.603	-225.683	727.708	20.4634	-160.292	742.308	38.6801	-178.868	760.444	-37.165	-145.382	730.454	-120.646
187	1.86	16.4597	1160.3	87.2319	88.6785	1157.26	131.229	-53.886	1166.72	127.106	185.479	990.291	240.956	-148.082	980.101	248.066	9.81474	956.771	174.716	308.205	693.332	287.431	268.035	727.778	48.4188	202.946	743.712	62.9553	216.447	761.926	-11.6003	202.488	730.428	-100.771	-251.819	673.35	267.609	-225.671	727.686	20.4626	-160.288	742.301	38.6647	-178.826	760.412	-37.0779	-145.353	730.426	-120.641
188	1.87	16.4765	1160.22	87.3796	88.706	1157.2	131.298	-53.8834	1166.68	127.173	185.495	990.274	240.954	-148.086	980.093	248.069	9.79897	956.702	174.827	308.239	693.332	287.394	268.045	727.745	48.4618	202.932	743.644	62.9911	216.486	761.892	-11.5274	202.512	730.304	-100.566	-251.839	673.338	267.584	-225.668	727.655	20.485	-160.297	742.273	38.6965	-178.838	760.289	-36.9384	-145.344	730.377	-120.595
189	1.88	16.4499	1160.14	87.4989	88.7248	1157.15	131.365	-53.8775	1166.66	127.208	185.505	990.244	240.952	-148.085	980.085	248.074	9.78472	956.625	174.999	308.266	693.313	287.339	268.023	727.706	48.5202	202.91	743.582	63.0114	216.505	761.872	-11.4975	202.5	730.228	-100.457	-251.84	673.33	267.545	-225.664	727.623	20.5223	-160.319	742.228	38.7454	-178.881	760.156	-36.7955	-145.348	730.339	-120.558
190	1.89	16.4396	1160.08	87.5504	88.7296	1157.12	131.396	-53.8634	1166.65	127.235	185.507	990.221	240.954	-148.082	980.089	248.067	9.77113	956.605	175.055	308.288	693.285	287.304	268.017	727.678	48.5503	202.906	743.56	63.0254	216.53	761.869	-11.4806	202.488	730.193	-100.404	-251.835	673.298	267.508	-225.669	727.61	20.5473	-160.347	742.195	38.7926	-178.917	760.07	-36.6932	-145.344	730.383	-120.631
191	1.9	16.4688	1160.09	87.531	88.7301	1157.14	131.393	-53.8547	1166.69	127.207	185.509	990.217	240.97	-148.072	980.079	248.076	9.7832	956.624	175.063	308.291	693.272	287.325	268.028	727.646	48.5971	202.915	743.586	63.026	216.553	761.89	-11.4894	202.478	730.214	-100.437	-251.821	673.271	267.49	-225.675	727.625	20.5232	-160.338	742.216	38.7891	-178.907	760.036	-36.6174	-145.32	730.453	-120.712
192	1.91	16.5124	1160.17	87.4448	88.7337	1157.17	131.363	-53.8257	1166.75	127.157	185.519	990.24	240.993	-148.058	980.077	248.09	9.81255	956.704	174.993	308.273	693.28	287.363	268.047	727.649	48.6233	202.938	743.641	63.0534	216.535	761.933	-11.5223	202.492	730.301	-100.541	-251.818	673.293	267.558	-225.673	727.664	20.5182	-160.294	742.277	38.7445	-178.878	760.086	-36.6416	-145.303	730.475	-120.721
193	1.92	16.5392	1160.28	87.2909	88.7485	1157.23	131.311	-53.7986	1166.81	127.119	185.546	990.282	240.996	-148.042	980.132	248.077	9.8426	956.806	174.877	308.268	693.315	287.394	268.062	727.705	48.5616	202.949	743.726	63.0327	216.475	761.958	-11.5807	202.49	730.452	-100.701	-251.793	673.329	267.594	-225.658	727.735	20.4975	-160.267	742.343	38.7257	-178.828	760.23	-36.738	-145.286	730.608	-120.834
194	1.93	16.5717	1160.33	87.2544	88.7694	1157.25	131.292	-53.7876	1166.83	127.121	185.558	990.308	240.956	-148.038	980.187	248.062	9.86926	956.865	174.852	308.267	693.335	287.369	268.061	727.777	48.4909	202.962	743.774	62.9977	216.448	761.955	-11.6001	202.502	730.517	-100.736	-251.769	673.389	267.6	-225.656	727.77	20.4723	-160.263	742.386	38.6887	-178.803	760.35	-36.8803	-145.299	730.618	-120.821
195	1.94	16.5664	1160.31	87.2816	88.778	1157.22	131.354	-53.7833	1166.81	127.132	185.547	990.305	240.933	-148.053	980.205	248.039	9.86783	956.869	174.893	308.26	693.332	287.337	268.053	727.807	48.4726	202.969	743.746	63.0214	216.465	761.927	-11.5661	202.515	730.458	-100.674	-251.784	673.417	267.6	-225.646	727.751	20.4641	-160.262	742.368	38.681	-178.795	760.357	-36.9584	-145.319	730.495	-120.684
196	1.95	16.5456	1160.23	87.3775	88.7763	1157.16	131.4	-53.7974	1166.77	127.154	185.541	990.258	240.931	-148.078	980.192	248.056	9.84771	956.828	174.94	308.259	693.305	287.373	268.05	727.778	48.4881	202.961	743.678	63.031	216.49	761.89	-11.5557	202.521	730.369	-100.617	-251.814	673.416	267.609	-225.66	727.694	20.4864	-160.26	742.305	38.7105	-178.79	760.277	-36.9205	-145.314	730.402	-120.612
197	1.96	16.5396	1160.13	87.4548	88.7777	1157.1	131.393	-53.8052	1166.7	127.183	185.532	990.211	240.933	-148.094	980.161	248.07	9.81813	956.753	174.987	308.248	693.251	287.368	268.038	727.716	48.5134	202.93	743.608	62.9992	216.516	761.843	-11.5514	202.497	730.283	-100.573	-251.832	673.373	267.57	-225.667	727.624	20.5319	-160.275	742.248	38.7169	-178.831	760.136	-36.7998	-145.308	730.384	-120.636
198	1.97	16.4992	1160.05	87.5535	88.7395	1157.06	131.41	-53.8293	1166.65	127.242	185.526	990.172	240.962	-148.102	980.133	248.106	9.78531	956.703	175.081	308.245	693.214	287.36	268.005	727.663	48.547	202.887	743.564	62.9919	216.523	761.849	-11.5245	202.466	730.204	-100.497	-251.834	673.339	267.545	-225.678	727.592	20.546	-160.321	742.205	38.7462	-178.896	760.022	-36.6852	-145.332	730.416	-120.708
199	1.98	16.4432	1160.03	87.5707	88.6943	1157.06	131.415	-53.8714	1166.66	127.266	185.532	990.169	240.987	-148.112	980.147	248.118	9.74189	956.713	175.122	308.24	693.221	287.376	267.985	727.656	48.5475	202.857	743.56	63.0117	216.487	761.893	-11.529	202.432	730.187	-100.466	-251.824	673.342	267.538	-225.701	727.611	20.5345	-160.354	742.203	38.7627	-178.936	759.99	-36.6238	-145.385	730.368	-120.624
200	1.99	16.4285	1160.08	87.4624	88.6881	1157.1	131.353	-53.8725	1166.68	127.224	185.561	990.202	240.959	-148.092	980.181	248.101	9.73421	956.775	175.074	308.233	693.232	287.358	267.987	727.672	48.4991	202.857	743.594	63.0167	216.45	761.903	-11.5656	202.408	730.261	-100.545	-251.797	673.364	267.531	-225.71	727.647	20.505	-160.352	742.24	38.7341	-178.956	760.102	-36.7673	-145.389	730.424	-120.661
201	2	16.4652	1160.13	87.3923	88.7051	1157.14	131.29	-53.8418	1166.72	127.169	185.585	990.225	240.936	-148.048	980.198	248.094	9.76222	956.851	174.978	308.223	693.227	287.348	268.023	727.701	48.4916	202.882	743.646	62.9928	216.485	761.886	-11.5483	202.432	730.339	-100.644	-251.765	673.41	267.581	-225.685	727.688	20.4745	-160.305	742.296	38.7007	-178.914	760.237	-36.9402	-145.354	730.538	-120.809
202	2.01	16.4941	1160.19	87.3547	88.739	1157.17	131.311	-53.8259	1166.75	127.176	185.603	990.243	240.965	-148.04	980.226	248.14	9.81564	956.918	174.939	308.21	693.224	287.389	268.06	727.727	48.5408	202.932	743.705	62.9909	216.49	761.896	-11.5322	202.478	730.403	-100.681	-251.764	673.449	267.627	-225.662	727.719	20.499	-160.274	742.339	38.6933	-178.853	760.36	-37.0206	-145.326	730.545	-120.782
203	2.02	16.4921	1160.24	87.324	88.7343	1157.2	131.302	-53.8305	1166.77	127.169	185.61	990.275	240.996	-148.045	980.26	248.151	9.84962	956.997	174.906	308.201	693.231	287.406	268.07	727.756	48.5431	202.961	743.729	63.0184	216.451	761.924	-11.5488	202.492	730.464	-100.726	-251.774	673.476	267.638	-225.663	727.727	20.5062	-160.264	742.373	38.6986	-178.83	760.38	-36.9963	-145.331	730.491	-120.678
204	2.03	16.4845	1160.24	87.3362	88.7309	1157.2	131.34	-53.8312	1166.77	127.199	185.603	990.286	240.992	-148.054	980.28	248.131	9.86335	957.007	174.922	308.198	693.273	287.433	268.057	727.773	48.5036	202.956	743.71	63.0181	216.446	761.922	-11.5795	202.488	730.444	-100.732	-251.799	673.49	267.606	-225.659	727.723	20.508	-160.274	742.356	38.7024	-178.814	760.346	-36.9537	-145.33	730.454	-120.638
205	2.04	16.4612	1160.2	87.3918	88.7291	1157.17	131.378	-53.8313	1166.73	127.288	185.6	990.302	240.987	-148.064	980.292	248.148	9.84906	956.965	175.012	308.201	693.295	287.407	268.031	727.776	48.4831	202.935	743.677	63.0298	216.493	761.934	-11.5548	202.479	730.386	-100.668	-251.836	673.486	267.577	-225.662	727.707	20.5168	-160.284	742.319	38.7105	-178.82	760.239	-36.8106	-145.345	730.432	-120.62
206	2.05	16.4464	1160.12	87.4847	88.7028	1157.15	131.389	-53.8572	1166.69	127.333	185.578	990.299	240.984	-148.079	980.284	248.146	9.8362	956.923	175.112	308.207	693.298	287.381	268.007	727.754	48.4594	202.911	743.649	63.0471	216.507	761.944	-11.5777	202.467	730.341	-100.632	-251.88	673.457	267.538	-225.679	727.678	20.52	-160.322	742.273	38.7641	-178.835	760.059	-36.5487	-145.344	730.405	-120.605
207	2.06	16.445	1160.08	87.5431	88.7069	1157.12	131.432	-53.8615	1166.66	127.327	185.579	990.262	240.992	-148.073	980.263	248.15	9.8531	956.902	175.183	308.219	693.268	287.358	268.01	727.709	48.4981	202.927	743.617	63.0461	216.517	761.927	-11.5854	202.491	730.264	-100.567	-251.915	673.448	267.532	-225.677	727.632	20.5206	-160.329	742.226	38.7856	-178.85	759.989	-36.526	-145.327	730.365	-120.574
208	2.07	16.4453	1160.06	87.5983	88.734	1157.09	131.491	-53.8589	1166.66	127.348	185.6	990.254	241.011	-148.07	980.244	248.191	9.85106	956.906	175.224	308.247	693.238	287.346	268.049	727.668	48.5674	202.934	743.599	63.0382	216.545	761.901	-11.5342	202.519	730.208	-100.473	-251.923	673.458	267.553	-225.669	727.61	20.5397	-160.315	742.213	38.7669	-178.844	759.999	-36.577	-145.305	730.338	-120.57
209	2.08	16.4335	1160.11	87.6242	88.7145	1157.13	131.492	-53.8703	1166.7	127.369	185.625	990.3	241.011	-148.046	980.274	248.203	9.84036	956.984	175.202	308.284	693.244	287.32	268.071	727.684	48.5773	202.933	743.631	63.0364	216.557	761.875	-11.4899	202.518	730.249	-100.474	-251.889	673.497	267.571	-225.659	727.641	20.56	-160.294	742.27	38.7497	-178.841	760.127	-36.7127	-145.304	730.363	-120.575
210	2.09	16.405	1160.2	87.5309	88.6911	1157.2	131.468	-53.8817	1166.76	127.316	185.654	990.371	240.997	-148.023	980.335	248.167	9.8414	957.1	175.119	308.317	693.314	287.327	268.082	727.725	48.5297	202.946	743.677	63.0149	216.517	761.865	-11.5304	202.513	730.335	-100.557	-251.836	673.558	267.594	-225.643	727.696	20.5205	-160.266	742.346	38.7001	-178.836	760.293	-36.951	-145.307	730.46	-120.687
211	2.1	16.3944	1160.28	87.4035	88.6713	1157.22	131.448	-53.8867	1166.79	127.235	185.666	990.424	241.004	-148.018	980.377	248.135	9.8549	957.202	175.029	308.319	693.393	287.365	268.091	727.748	48.4726	202.94	743.717	62.9783	216.46	761.882	-11.5508	202.494	730.413	-100.663	-251.811	673.62	267.623	-225.614	727.739	20.4747	-160.253	742.382	38.645	-178.825	760.407	-37.1447	-145.293	730.545	-120.79
212	2.11	16.3987	1160.3	87.4154	88.6426	1157.23	131.436	-53.8994	1166.79	127.231	185.655	990.445	241.03	-148.039	980.395	248.156	9.84777	957.277	175.008	308.31	693.432	287.386	268.082	727.753	48.4732	202.929	743.723	62.97	216.421	761.92	-11.6018	202.468	730.434	-100.71	-251.843	673.647	267.638	-225.623	727.748	20.4628	-160.251	742.387	38.6351	-178.825	760.414	-37.1393	-145.314	730.538	-120.779
213	2.12	16.3755	1160.26	87.4911	88.6052	1157.23	131.404	-53.935	1166.77	127.26	185.622	990.458	241.057	-148.08	980.393	248.157	9.8144	957.276	175.106	308.305	693.455	287.412	268.033	727.741	48.4637	202.896	743.719	62.9492	216.405	761.941	-11.6438	202.433	730.414	-100.727	-251.89	673.64	267.621	-225.66	727.721	20.4747	-160.286	742.36	38.6605	-178.824	760.312	-37.006	-145.341	730.545	-120.822
214	2.13	16.3353	1160.22	87.5335	88.5738	1157.22	131.42	-53.9682	1166.7	127.268	185.597	990.47	241.062	-148.115	980.394	248.149	9.78651	957.245	175.206	308.32	693.486	287.411	267.985	727.713	48.4525	202.871	743.693	62.9432	216.408	761.938	-11.6259	202.399	730.359	-100.684	-251.933	673.616	267.547	-225.694	727.687	20.4711	-160.339	742.305	38.6865	-178.865	760.173	-36.8821	-145.367	730.437	-120.708
215	2.14	16.3123	1160.13	87.6263	88.5506	1157.19	131.463	-53.9908	1166.63	127.329	185.59	990.488	241.081	-148.131	980.4	248.179	9.76731	957.229	175.294	308.338	693.52	287.395	267.959	727.715	48.4439	202.859	743.665	62.9574	216.409	761.924	-11.5995	202.385	730.297	-100.605	-251.986	673.636	267.514	-225.71	727.658	20.4753	-160.367	742.256	38.7472	-178.897	760.072	-36.7583	-145.376	730.394	-120.637
216	2.15	16.305	1160.07	87.6875	88.5542	1157.17	131.49	-53.9956	1166.59	127.373	185.612	990.505	241.079	-148.12	980.438	248.182	9.77919	957.242	175.347	308.357	693.517	287.347	267.964	727.727	48.4314	202.878	743.649	62.9789	216.452	761.896	-11.5914	202.413	730.256	-100.52	-252.015	673.673	267.511	-225.71	727.645	20.4967	-160.367	742.232	38.7652	-178.899	760.005	-36.646	-145.369	730.352	-120.591
217	2.16	16.3457	1160.08	87.6401	88.583	1157.17	131.478	-53.9681	1166.56	127.349	185.653	990.517	241.076	-148.073	980.458	248.181	9.83171	957.304	175.328	308.401	693.502	287.297	268.013	727.734	48.4396	202.928	743.663	62.9852	216.522	761.882	-11.5697	202.47	730.244	-100.487	-251.988	673.713	267.528	-225.68	727.631	20.5086	-160.324	742.238	38.7504	-178.843	760.06	-36.7152	-145.328	730.32	-120.587
218	2.17	16.3924	1160.13	87.5735	88.6073	1157.19	131.473	-53.9272	1166.58	127.306	185.695	990.542	241.102	-148.039	980.486	248.212	9.90237	957.398	175.254	308.427	693.488	287.299	268.076	727.734	48.5101	202.972	743.695	62.9751	216.564	761.886	-11.5289	202.542	730.276	-100.524	-251.954	673.756	267.584	-225.629	727.638	20.4934	-160.269	742.284	38.7026	-178.774	760.199	-36.8677	-145.271	730.343	-120.595
219	2.18	16.3881	1160.2	87.5045	88.5952	1157.23	131.476	-53.9344	1166.61	127.287	185.709	990.591	241.163	-148.026	980.537	248.264	9.93377	957.502	175.185	308.415	693.508	287.348	268.114	727.739	48.5322	202.983	743.754	62.9818	216.526	761.917	-11.5498	202.541	730.38	-100.629	-251.942	673.807	267.673	-225.614	727.696	20.4861	-160.247	742.352	38.6716	-178.745	760.29	-36.8937	-145.253	730.408	-120.607
220	2.19	16.3232	1160.27	87.412	88.5623	1157.29	131.434	-53.9686	1166.65	127.27	185.712	990.639	241.182	-148.029	980.571	248.273	9.92939	957.564	175.132	308.427	693.562	287.354	268.122	727.758	48.5121	202.977	743.803	62.9712	216.45	761.963	-11.616	202.504	730.473	-100.729	-251.949	673.857	267.702	-225.631	727.745	20.4688	-160.247	742.394	38.666	-178.773	760.362	-36.9877	-145.27	730.463	-120.645
221	2.2	16.274	1160.25	87.3559	88.5356	1157.28	131.383	-54.0074	1166.65	127.252	185.716	990.679	241.163	-148.035	980.608	248.255	9.90405	957.568	175.118	308.46	693.639	287.374	268.114	727.767	48.4779	202.969	743.81	62.9562	216.438	761.98	-11.6492	202.471	730.499	-100.779	-251.966	673.869	267.632	-225.64	727.757	20.4436	-160.259	742.411	38.6675	-178.774	760.337	-36.9891	-145.286	730.523	-120.744
222	2.21	16.2333	1160.18	87.3954	88.5074	1157.25	131.398	-54.0376	1166.61	127.267	185.722	990.686	241.16	-148.054	980.63	248.275	9.86982	957.523	175.209	308.481	693.683	287.359	268.088	727.752	48.4497	202.939	743.779	62.9481	216.441	761.968	-11.6557	202.447	730.429	-100.736	-252.021	673.869	267.565	-225.635	727.743	20.4463	-160.275	742.383	38.6956	-178.772	760.233	-36.8469	-145.285	730.554	-120.787
223	2.22	16.1974	1160.05	87.46	88.488	1157.16	131.439	-54.0758	1166.54	127.298	185.704	990.677	241.178	-148.094	980.611	248.302	9.83452	957.429	175.314	308.489	693.687	287.342	268.336	727.567	47.2811	202.912	743.713	62.9682	216.751	762.13	-11.9464	202.441	730.306	-100.61	-252.086	673.862	267.523	-225.657	727.679	20.4739	-160.312	742.32	38.7305	-178.806	760.068	-36.6534	-145.291	730.469	-120.727
224	2.23	16.1678	1159.95	87.4967	88.4712	1157.1	131.424	-54.121	1166.48	127.314	185.687	990.656	241.181	-148.135	980.597	248.312	9.82053	957.354	175.39	308.501	693.672	287.325	268.69	727.349	45.8226	202.914	743.654	62.9737	217.158	762.332	-12.2724	202.455	730.212	-100.482	-252.145	673.849	267.526	-225.671	727.612	20.5105	-160.334	742.273	38.7577	-178.836	759.981	-36.5774	-145.29	730.478	-120.806
225	2.24	16.1435	1159.92	87.4657	88.4629	1157.07	131.396	-54.1534	1166.47	127.319	185.691	990.671	241.161	-148.161	980.616	248.344	9.80762	957.368	175.417	308.52	693.678	287.328	268.194	727.619	47.7899	202.932	743.646	62.9531	216.671	761.953	-11.7171	202.465	730.189	-100.454	-252.155	673.878	267.55	-225.677	727.595	20.5174	-160.336	742.267	38.7441	-178.838	760.029	-36.6924	-145.298	730.441	-120.754
226	2.25	16.0953	1159.95	87.3111	88.4448	1157.08	131.33	-54.178	1166.49	127.274	185.686	990.728	241.152	-148.174	980.669	248.372	9.79329	957.449	175.383	308.522	693.714	287.288	268.07	727.719	48.2591	202.928	743.685	62.9352	216.497	761.883	-11.6353	202.437	730.251	-100.555	-252.16	673.953	267.589	-225.68	727.629	20.4879	-160.34	742.303	38.7171	-178.841	760.14	-36.8395	-145.311	730.37	-120.642
227	2.26	16.056	1159.99	87.1417	88.4276	1157.1	131.253	-54.1988	1166.51	127.201	185.687	990.797	241.136	-148.166	980.728	248.361	9.79754	957.57	175.308	308.529	693.79	287.304	268.05	727.761	48.3794	202.927	743.748	62.91	216.419	761.891	-11.6246	202.433	730.336	-100.652	-252.151	674.004	267.575	-225.681	727.68	20.4351	-160.331	742.345	38.6679	-178.83	760.251	-36.9915	-145.326	730.394	-120.653
228	2.27	16.0273	1160.05	87.0032	88.4058	1157.13	131.189	-54.2091	1166.52	127.118	185.699	990.852	241.135	-148.156	980.775	248.369	9.79267	957.686	175.213	308.549	693.832	287.344	268.06	727.786	48.3832	202.938	743.806	62.8926	216.378	761.912	-11.6766	202.414	730.427	-100.762	-252.127	674.029	267.564	-225.683	727.722	20.3997	-160.315	742.388	38.6422	-178.814	760.356	-37.1017	-145.321	730.45	-120.693
229	2.28	15.9841	1160.07	86.8623	88.3698	1157.15	131.15	-54.2331	1166.52	127.09	185.697	990.891	241.154	-148.163	980.803	248.408	9.76723	957.746	175.198	308.552	693.862	287.369	268.06	727.777	48.4347	202.928	743.835	62.9077	216.355	761.958	-11.7099	202.376	730.497	-100.832	-252.123	674.037	267.598	-225.694	727.737	20.4311	-160.318	742.415	38.6629	-178.819	760.378	-37.0993	-145.323	730.506	-120.772
230	2.29	15.9581	1159.98	86.9299	88.3401	1157.12	131.171	-54.2642	1166.47	127.123	185.702	990.906	241.191	-148.171	980.804	248.472	9.73707	957.728	175.297	308.566	693.887	287.382	268.033	727.746	48.4925	202.91	743.804	62.9472	216.359	761.964	-11.6733	202.37	730.453	-100.734	-252.167	674.044	267.612	-225.696	727.716	20.4849	-160.34	742.405	38.6867	-178.844	760.316	-37.0299	-145.325	730.527	-120.807
231	2.3	15.9531	1159.85	87.0815	88.345	1157.06	131.17	-54.272	1166.39	127.139	185.714	990.913	241.205	-148.171	980.797	248.495	9.74447	957.659	175.396	308.618	693.907	287.371	268.041	727.731	48.4879	202.919	743.755	62.963	216.406	761.928	-11.6123	202.4	730.334	-100.591	-252.201	674.042	267.563	-225.682	727.661	20.4641	-160.339	742.365	38.7063	-178.866	760.207	-36.9276	-145.31	730.422	-120.702
232	2.31	15.9591	1159.77	87.1377	88.3606	1157.01	131.191	-54.2862	1166.32	127.152	185.731	990.939	241.211	-148.161	980.81	248.501	9.77393	957.619	175.448	308.665	693.928	287.312	268.063	727.737	48.462	202.943	743.724	62.9631	216.479	761.885	-11.5682	202.443	730.253	-100.496	-252.22	674.071	267.512	-225.655	727.63	20.4567	-160.326	742.33	38.7063	-178.855	760.12	-36.8037	-145.269	730.41	-120.696
233	2.32	15.962	1159.72	87.1567	88.366	1156.99	131.2	-54.2956	1166.28	127.174	185.747	990.958	241.242	-148.154	980.825	248.493	9.79055	957.598	175.507	308.696	693.957	287.282	268.063	727.757	48.4532	202.955	743.716	62.9723	216.483	761.86	-11.5807	202.456	730.235	-100.504	-252.245	674.112	267.529	-225.648	727.616	20.482	-160.315	742.312	38.7121	-178.835	760.058	-36.6668	-145.241	730.433	-120.731
234	2.33	15.9384	1159.73	87.0949	88.3571	1157.01	131.181	-54.303	1166.29	127.136	185.75	990.983	241.245	-148.154	980.848	248.53	9.82303	957.648	175.484	308.707	693.983	287.31	268.068	727.776	48.4285	202.96	743.743	62.9722	216.46	761.89	-11.6132	202.472	730.25	-100.517	-252.265	674.136	267.559	-225.645	727.619	20.4819	-160.293	742.328	38.7011	-178.803	760.101	-36.6908	-145.246	730.365	-120.649
235	2.34	15.9111	1159.81	86.9547	88.3329	1157.06	131.138	-54.3253	1166.3	127.101	185.76	991.014	241.225	-148.164	980.881	248.561	9.84299	957.746	175.392	308.696	694.003	287.355	268.068	727.796	48.3916	202.974	743.809	62.9413	216.42	761.932	-11.6466	202.455	730.353	-100.663	-252.258	674.168	267.588	-225.655	727.632	20.4867	-160.284	742.377	38.6406	-178.77	760.235	-36.8865	-145.259	730.374	-120.669
236	2.35	15.871	1159.85	86.8682	88.2941	1157.1	131.084	-54.3546	1166.3	127.114	185.768	991.039	241.226	-148.166	980.918	248.592	9.83196	957.824	175.337	308.709	694.024	287.371	268.082	727.815	48.389	202.985	743.856	62.8827	216.388	761.949	-11.6804	202.427	730.44	-100.783	-252.248	674.209	267.615	-225.655	727.66	20.4634	-160.283	742.392	38.6312	-178.744	760.289	-36.9709	-145.259	730.392	-120.654
237	2.36	15.8119	1159.87	86.8577	88.2443	1157.13	131.067	-54.3903	1166.3	127.131	185.782	991.054	241.231	-148.159	980.949	248.597	9.83494	957.856	175.349	308.747	694.061	287.357	268.11	727.82	48.3874	202.976	743.861	62.8595	216.367	761.964	-11.6684	202.411	730.463	-100.783	-252.236	674.244	267.622	-225.654	727.682	20.449	-160.285	742.393	38.6372	-178.742	760.284	-36.9205	-145.272	730.397	-120.659
238	2.37	15.7545	1159.86	86.8458	88.1894	1157.15	131.062	-54.4464	1166.28	127.148	185.785	991.071	241.25	-148.17	980.976	248.584	9.82112	957.878	175.389	308.777	694.094	287.337	268.12	727.806	48.4187	202.954	743.853	62.8852	216.329	761.984	-11.6586	202.397	730.465	-100.75	-252.254	674.267	267.587	-225.671	727.695	20.4308	-160.321	742.399	38.6613	-178.75	760.293	-36.9546	-145.294	730.409	-120.679
239	2.38	15.6791	1159.83	86.8786	88.1339	1157.14	131.055	-54.5107	1166.25	127.163	185.776	991.073	241.237	-148.199	980.993	248.58	9.76191	957.877	175.46	308.806	694.109	287.33	268.094	727.777	48.4238	202.921	743.833	62.8991	216.295	761.98	-11.6849	202.351	730.447	-100.721	-252.304	674.27	267.557	-225.704	727.701	20.4302	-160.352	742.387	38.6765	-178.788	760.236	-36.9535	-145.327	730.416	-120.675
240	2.39	15.5975	1159.79	86.94	88.0846	1157.12	131.062	-54.5717	1166.22	127.222	185.778	991.065	241.275	-148.211	980.997	248.625	9.70162	957.839	175.535	308.832	694.129	287.343	268.069	727.743	48.4053	202.888	743.801	62.9001	216.298	761.973	-11.6895	202.318	730.393	-100.683	-252.346	674.251	267.521	-225.719	727.677	20.4722	-160.36	742.376	38.6956	-178.85	760.156	-36.8601	-145.332	730.447	-120.723
241	2.4	15.5562	1159.75	86.9811	88.0565	1157.09	131.073	-54.5924	1166.19	127.264	185.789	991.068	241.303	-148.202	980.986	248.663	9.72182	957.819	175.599	308.853	694.135	287.348	268.063	727.737	48.4206	202.891	743.773	62.9222	216.351	761.939	-11.6368	202.323	730.325	-100.614	-252.377	674.263	267.508	-225.705	727.658	20.4788	-160.354	742.365	38.7148	-178.86	760.143	-36.845	-145.311	730.483	-120.793
242	2.41	15.5594	1159.72	86.9867	88.0617	1157.08	131.085	-54.6027	1166.18	127.236	185.803	991.09	241.271	-148.2	981.01	248.651	9.76965	957.861	175.562	308.871	694.14	287.31	268.072	727.762	48.3924	202.918	743.767	62.9301	216.381	761.898	-11.6232	202.377	730.296	-100.588	-252.401	674.323	267.503	-225.677	727.648	20.4246	-160.328	742.385	38.6392	-178.84	760.202	-36.9324	-145.285	730.449	-120.763
243	2.42	15.5523	1159.71	86.9891	88.0611	1157.08	131.082	-54.6177	1166.19	127.263	185.821	991.106	241.238	-148.182	981.041	248.647	9.79223	957.915	175.543	308.896	694.162	287.284	268.08	727.792	48.3573	202.945	743.772	62.9221	216.401	761.868	-11.6135	202.399	730.321	-100.605	-252.411	674.407	267.539	-225.657	727.654	20.3933	-160.316	742.398	38.6264	-178.811	760.232	-36.9764	-145.255	730.493	-120.87
244	2.43	15.524	1159.73	86.9918	88.0503	1157.09	131.064	-54.6274	1166.19	127.301	185.84	991.131	241.24	-148.167	981.08	248.664	9.79546	957.966	175.566	308.927	694.183	287.288	268.093	727.822	48.3362	202.967	743.793	62.9138	216.424	761.857	-11.5789	202.412	730.328	-100.571	-252.395	674.442	267.54	-225.635	727.663	20.4035	-160.312	742.395	38.6509	-178.8	760.268	-37.0038	-145.25	730.48	-120.855
245	2.44	15.487	1159.77	86.9542	88.0343	1157.11	131.049	-54.6443	1166.19	127.323	185.856	991.149	241.26	-148.171	981.09	248.671	9.80832	958.025	175.536	308.918	694.188	287.311	268.099	727.822	48.3544	202.988	743.81	62.9318	216.401	761.892	-11.6117	202.408	730.363	-100.632	-252.394	674.468	267.565	-225.636	727.652	20.4347	-160.311	742.411	38.6174	-178.782	760.331	-37.0904	-145.253	730.408	-120.731
246	2.45	15.4439	1159.79	86.9617	88.0108	1157.14	131.035	-54.6878	1166.2	127.377	185.861	991.149	241.259	-148.178	981.09	248.721	9.80939	958.065	175.533	308.919	694.174	287.321	268.097	727.796	48.3843	202.973	743.826	62.9328	216.341	761.918	-11.6652	202.392	730.389	-100.696	-252.424	674.471	267.588	-225.656	727.64	20.4371	-160.329	742.401	38.6325	-178.784	760.31	-37.0962	-145.273	730.386	-120.72
247	2.46	15.3778	1159.81	87.0088	87.9789	1157.16	131.038	-54.7411	1166.21	127.46	185.871	991.148	241.253	-148.177	981.108	248.74	9.78605	958.075	175.592	308.944	694.176	287.331	268.109	727.772	48.4015	202.955	743.838	62.9274	216.315	761.941	-11.6816	202.362	730.413	-100.708	-252.442	674.457	267.576	-225.684	727.655	20.4447	-160.345	742.396	38.6962	-178.787	760.233	-36.9563	-145.279	730.384	-120.69
248	2.47	15.3182	1159.84	87.0251	87.9301	1157.19	130.998	-54.7688	1166.21	127.527	185.874	991.174	241.242	-148.16	981.143	248.71	9.75378	958.119	175.538	308.982	694.212	287.323	268.104	727.778	48.3915	202.946	743.834	62.9107	216.323	761.978	-11.7281	202.341	730.424	-100.723	-252.422	674.457	267.53	-225.691	727.675	20.4477	-160.354	742.397	38.7145	-178.807	760.18	-36.8747	-145.272	730.404	-120.683
249	2.48	15.2857	1159.84	87.0679	87.9044	1157.21	130.998	-54.806	1166.22	127.548	185.881	991.199	241.213	-148.158	981.173	248.708	9.75055	958.131	175.507	309.013	694.241	287.295	268.098	727.784	48.3736	202.937	743.831	62.9038	216.317	761.979	-11.7302	202.336	730.429	-100.735	-252.418	674.456	267.499	-225.685	727.669	20.4254	-160.347	742.393	38.7053	-178.836	760.153	-36.8618	-145.277	730.444	-120.751
250	2.49	15.2693	1159.86	87.083	87.8977	1157.19	131.042	-54.8199	1166.23	127.575	185.871	991.214	241.193	-148.174	981.188	248.762	9.76471	958.122	175.564	309.039	694.273	287.296	268.092	727.79	48.355	202.936	743.813	62.9386	216.318	761.952	-11.7067	202.326	730.409	-100.724	-252.438	674.481	267.505	-225.684	727.659	20.4484	-160.336	742.406	38.6967	-178.839	760.152	-36.8529	-145.278	730.526	-120.864
251	2.5	15.2815	1159.88	87.0833	87.9121	1157.21	131.044	-54.7956	1166.26	127.606	185.871	991.231	241.184	-148.17	981.206	248.795	9.76735	958.158	175.559	309.056	694.306	287.311	268.086	727.808	48.3078	202.947	743.812	62.94	216.32	761.927	-11.6969	202.345	730.382	-100.681	-252.428	674.515	267.545	-225.66	727.657	20.4406	-160.305	742.432	38.6345	-178.812	760.183	-36.8876	-145.263	730.537	-120.866
252	2.51	15.3159	1159.89	87.057	87.9558	1157.19	131.057	-54.7706	1166.27	127.61	185.882	991.245	241.154	-148.156	981.22	248.803	9.78479	958.189	175.52	309.079	694.341	287.316	268.098	727.83	48.2752	202.973	743.826	62.9001	216.32	761.895	-11.6664	202.384	730.368	-100.682	-252.405	674.568	267.588	-225.624	727.652	20.427	-160.278	742.437	38.601	-178.764	760.253	-36.9621	-145.233	730.505	-120.869
253	2.52	15.3526	1159.87	87.0868	87.9725	1157.18	131.045	-54.742	1166.28	127.578	185.876	991.26	241.114	-148.165	981.233	248.777	9.78441	958.188	175.517	309.111	694.371	287.296	268.124	727.85	48.2689	202.97	743.825	62.8764	216.313	761.888	-11.6664	202.395	730.347	-100.653	-252.404	674.609	267.613	-225.621	727.646	20.4208	-160.274	742.424	38.5997	-178.749	760.298	-37.0383	-145.233	730.422	-120.762
254	2.53	15.3504	1159.89	87.0888	87.9479	1157.19	131.042	-54.7416	1166.29	127.599	185.858	991.296	241.078	-148.188	981.268	248.781	9.73277	958.226	175.511	309.144	694.407	287.278	268.11	727.869	48.2717	202.945	743.835	62.8866	216.27	761.912	-11.6922	202.364	730.356	-100.664	-252.412	674.634	267.601	-225.64	727.655	20.4171	-160.292	742.423	38.6	-178.761	760.292	-37.0364	-145.24	730.421	-120.748
255	2.54	15.3204	1159.92	87.036	87.9334	1157.2	131.007	-54.749	1166.3	127.629	185.842	991.321	241.053	-148.213	981.301	248.767	9.68285	958.269	175.502	309.168	694.422	287.269	268.073	727.868	48.2384	202.925	743.858	62.8712	216.208	761.954	-11.763	202.317	730.386	-100.709	-252.408	674.609	267.569	-225.672	727.667	20.4309	-160.315	742.418	38.6155	-178.787	760.267	-37.02	-145.264	730.499	-120.855
256	2.55	15.3061	1159.92	87.0056	87.937	1157.18	131.01	-54.7492	1166.31	127.629	185.819	991.326	241.047	-148.232	981.3	248.781	9.65088	958.286	175.521	309.192	694.416	287.235	268.062	727.832	48.2574	202.902	743.856	62.8551	216.192	761.979	-11.7696	202.266	730.408	-100.764	-252.417	674.587	267.57	-225.702	727.658	20.4323	-160.337	742.4	38.6555	-178.827	760.226	-37.0274	-145.293	730.475	-120.833
257	2.56	15.3362	1159.88	87.0503	87.9537	1157.14	131.039	-54.7352	1166.31	127.621	185.807	991.337	241.066	-148.246	981.296	248.787	9.64046	958.305	175.576	309.215	694.423	287.206	268.061	727.809	48.2703	202.898	743.843	62.8746	216.203	761.978	-11.764	202.261	730.388	-100.747	-252.438	674.581	267.573	-225.721	727.648	20.4478	-160.362	742.397	38.6688	-178.842	760.172	-36.9347	-145.307	730.394	-120.691
258	2.57	15.4115	1159.85	87.0755	88.0096	1157.1	131.069	-54.6765	1166.32	127.567	185.827	991.352	241.076	-148.225	981.317	248.796	9.66967	958.318	175.564	309.249	694.457	287.217	268.081	727.797	48.2817	202.914	743.837	62.8623	216.235	761.963	-11.7555	202.288	730.364	-100.715	-252.442	674.615	267.586	-225.696	727.65	20.4526	-160.347	742.414	38.6436	-178.84	760.162	-36.9306	-145.282	730.37	-120.683
259	2.58	15.497	1159.81	87.1119	88.0821	1157.08	131.107	-54.5944	1166.33	127.53	185.852	991.371	241.082	-148.183	981.362	248.796	9.70785	958.35	175.567	309.292	694.493	287.213	268.124	727.824	48.2884	202.948	743.849	62.8374	216.284	761.955	-11.7352	202.323	730.358	-100.698	-252.425	674.661	267.581	-225.655	727.663	20.4452	-160.313	742.427	38.6244	-178.827	760.197	-36.9526	-145.244	730.411	-120.761
260	2.59	15.5541	1159.82	87.1302	88.1308	1157.09	131.106	-54.5456	1166.35	127.472	185.851	991.393	241.078	-148.173	981.407	248.802	9.72658	958.415	175.602	309.293	694.511	287.19	268.134	727.848	48.2799	202.963	743.87	62.8514	216.301	761.928	-11.702	202.345	730.384	-100.721	-252.427	674.717	267.591	-225.644	727.68	20.4045	-160.299	742.453	38.6142	-178.818	760.242	-36.9893	-145.242	730.482	-120.864
261	2.6	15.6083	1159.83	87.0931	88.1714	1157.09	131.111	-54.4987	1166.37	127.438	185.847	991.412	241.106	-148.177	981.422	248.828	9.73914	958.48	175.584	309.269	694.526	287.211	268.125	727.866	48.2566	202.968	743.878	62.8817	216.288	761.921	-11.7242	202.356	730.399	-100.735	-252.452	674.768	267.622	-225.636	727.687	20.3979	-160.288	742.468	38.5821	-178.807	760.323	-37.1068	-145.235	730.463	-120.841
262	2.61	15.6684	1159.8	87.0931	88.2085	1157.08	131.114	-54.4306	1166.37	127.446	185.855	991.419	241.136	-148.16	981.436	248.883	9.75302	958.499	175.618	309.259	694.54	287.23	268.127	727.869	48.2696	202.972	743.884	62.8815	216.298	761.92	-11.7017	202.375	730.391	-100.723	-252.472	674.825	267.68	-225.61	727.67	20.4332	-160.269	742.479	38.6023	-178.76	760.302	-37.0733	-145.206	730.514	-120.901
263	2.62	15.6958	1159.78	87.0809	88.2454	1157.07	131.101	-54.4047	1166.36	127.46	185.856	991.422	241.128	-148.157	981.447	248.854	9.74672	958.512	175.601	309.268	694.534	287.206	268.12	727.859	48.251	202.98	743.875	62.8696	216.301	761.933	-11.688	202.369	730.374	-100.694	-252.499	674.824	267.646	-225.616	727.648	20.4389	-160.277	742.47	38.618	-178.711	760.196	-36.9457	-145.214	730.484	-120.844
264	2.63	15.7015	1159.78	87.0182	88.2674	1157.06	131.085	-54.41	1166.35	127.425	185.853	991.431	241.109	-148.162	981.468	248.832	9.72244	958.546	175.558	309.262	694.525	287.157	268.113	727.857	48.2171	202.965	743.88	62.8556	216.27	761.95	-11.7512	202.331	730.381	-100.746	-252.532	674.824	267.605	-225.652	727.657	20.3999	-160.308	742.448	38.609	-178.735	760.141	-36.8913	-145.249	730.401	-120.752
265	2.64	15.7177	1159.77	87.0417	88.2709	1157.04	131.104	-54.3952	1166.33	127.443	185.86	991.436	241.143	-148.157	981.487	248.847	9.71049	958.556	175.592	309.265	694.52	287.165	268.103	727.852	48.2389	202.946	743.865	62.8556	216.274	761.969	-11.7442	202.309	730.382	-100.75	-252.564	674.84	267.585	-225.677	727.674	20.3871	-160.329	742.434	38.6209	-178.781	760.139	-36.9422	-145.267	730.418	-120.792
266	2.65	15.7272	1159.74	87.0763	88.282	1157.02	131.117	-54.3876	1166.32	127.459	185.865	991.432	241.211	-148.154	981.497	248.869	9.71251	958.553	175.655	309.267	694.504	287.199	268.105	727.814	48.2752	202.941	743.858	62.8659	216.294	761.961	-11.7027	202.309	730.364	-100.682	-252.586	674.855	267.59	-225.678	727.662	20.4302	-160.337	742.43	38.6588	-178.814	760.156	-36.9444	-145.26	730.463	-120.813
267	2.66	15.7382	1159.72	87.0917	88.2812	1157.02	131.076	-54.3825	1166.33	127.441	185.854	991.418	241.213	-148.155	981.516	248.877	9.70768	958.579	175.632	309.262	694.491	287.203	268.104	727.795	48.2911	202.926	743.864	62.8864	216.275	761.951	-11.7129	202.287	730.378	-100.71	-252.598	674.857	267.596	-225.7	727.659	20.4454	-160.345	742.447	38.6567	-178.839	760.166	-36.9191	-145.286	730.408	-120.71
268	2.67	15.7537	1159.74	87.0102	88.293	1157.03	131.056	-54.3547	1166.33	127.403	185.867	991.417	241.203	-148.143	981.522	248.847	9.72117	958.612	175.595	309.23	694.48	287.197	268.108	727.801	48.2896	202.927	743.869	62.8826	216.246	761.941	-11.7593	202.294	730.395	-100.765	-252.604	674.898	267.612	-225.694	727.669	20.4019	-160.345	742.456	38.6308	-178.808	760.214	-36.9479	-145.3	730.443	-120.779
269	2.68	15.807	1159.72	87.0591	88.3355	1157	131.094	-54.3068	1166.32	127.44	185.889	991.417	241.225	-148.113	981.552	248.839	9.75794	958.628	175.602	309.219	694.498	287.219	268.114	727.827	48.2526	202.932	743.868	62.8794	216.246	761.929	-11.741	202.316	730.373	-100.72	-252.604	674.991	267.665	-225.677	727.666	20.3891	-160.328	742.462	38.6111	-178.758	760.261	-37.016	-145.271	730.481	-120.862
270	2.69	15.8264	1159.72	87.0708	88.3672	1157	131.088	-54.2764	1166.35	127.46	185.898	991.429	241.21	-148.093	981.588	248.833	9.76829	958.661	175.594	309.216	694.508	287.23	268.11	727.871	48.2089	202.947	743.88	62.8732	216.263	761.931	-11.726	202.332	730.372	-100.702	-252.596	675.068	267.697	-225.662	727.68	20.408	-160.306	742.479	38.6129	-178.736	760.297	-37.0645	-145.24	730.449	-120.789
271	2.7	15.8261	1159.73	87.0105	88.3805	1157	131.037	-54.2654	1166.38	127.417	185.913	991.424	241.19	-148.083	981.601	248.82	9.77693	958.666	175.551	309.205	694.5	287.232	268.112	727.877	48.2218	202.963	743.882	62.8578	216.266	761.925	-11.7466	202.333	730.392	-100.756	-252.6	675.1	267.691	-225.634	727.676	20.3898	-160.297	742.479	38.6084	-178.741	760.328	-37.139	-145.225	730.471	-120.851
272	2.71	15.8549	1159.7	87.0813	88.4108	1156.97	131.042	-54.2471	1166.37	127.449	185.918	991.388	241.207	-148.067	981.591	248.84	9.81402	958.637	175.582	309.176	694.476	287.248	268.12	727.854	48.227	202.966	743.847	62.8655	216.294	761.92	-11.724	202.344	730.378	-100.754	-252.633	675.069	267.65	-225.626	727.647	20.3819	-160.299	742.465	38.5998	-178.749	760.261	-37.0795	-145.226	730.424	-120.834
273	2.72	15.865	1159.67	87.1825	88.4111	1156.95	131.093	-54.2289	1166.35	127.517	185.922	991.369	241.216	-148.054	981.584	248.847	9.82185	958.619	175.63	309.156	694.465	287.263	268.118	727.833	48.2506	202.951	743.827	62.8924	216.329	761.923	-11.695	202.356	730.34	-100.677	-252.656	675.052	267.64	-225.643	727.643	20.408	-160.312	742.424	38.6293	-178.771	760.154	-36.9666	-145.236	730.437	-120.859
274	2.73	15.8574	1159.7	87.1628	88.4101	1156.95	131.091	-54.2356	1166.36	127.534	185.92	991.368	241.198	-148.041	981.585	248.826	9.80514	958.605	175.607	309.16	694.469	287.253	268.101	727.828	48.2467	202.928	743.813	62.8806	216.304	761.951	-11.7472	202.325	730.338	-100.682	-252.665	675.063	267.652	-225.666	727.642	20.431	-160.331	742.406	38.6387	-178.794	760.111	-36.9118	-145.257	730.372	-120.735
275	2.74	15.8594	1159.74	87.1452	88.4119	1156.97	131.083	-54.2411	1166.37	127.564	185.922	991.353	241.182	-148.041	981.596	248.795	9.79351	958.601	175.565	309.154	694.459	287.233	268.1	727.817	48.2412	202.923	743.816	62.8606	216.3	761.969	-11.7606	202.316	730.343	-100.711	-252.644	675.044	267.616	-225.683	727.641	20.4071	-160.336	742.402	38.6567	-178.814	760.124	-36.9307	-145.282	730.355	-120.7
276	2.75	15.866	1159.77	87.1729	88.427	1156.99	131.09	-54.236	1166.4	127.593	185.92	991.339	241.183	-148.03	981.609	248.848	9.79424	958.621	175.568	309.153	694.44	287.246	268.114	727.816	48.2798	202.927	743.843	62.8788	216.29	761.973	-11.6957	202.319	730.342	-100.684	-252.624	675.024	267.595	-225.696	727.644	20.4298	-160.35	742.431	38.675	-178.81	760.153	-36.9144	-145.292	730.359	-120.707
277	2.76	15.8838	1159.83	87.1406	88.4294	1157.03	131.045	-54.2059	1166.45	127.591	185.927	991.34	241.188	-148.011	981.613	248.867	9.81301	958.673	175.48	309.144	694.429	287.245	268.13	727.823	48.2801	202.959	743.882	62.9002	216.291	761.965	-11.6697	202.325	730.387	-100.716	-252.585	675.058	267.668	-225.683	727.672	20.4347	-160.341	742.463	38.6544	-178.784	760.243	-37.0037	-145.287	730.391	-120.725
278	2.77	15.9171	1159.91	87.0673	88.4664	1157.07	130.993	-54.1399	1166.5	127.553	185.943	991.34	241.163	-147.987	981.61	248.848	9.83598	958.731	175.337	309.138	694.421	287.235	268.151	727.844	48.282	202.991	743.929	62.852	216.295	761.977	-11.7293	202.351	730.462	-100.798	-252.517	675.084	267.748	-225.648	727.7	20.4017	-160.295	742.486	38.6116	-178.746	760.322	-37.1188	-145.251	730.443	-120.804
279	2.78	15.9515	1159.93	87.0354	88.5068	1157.08	130.959	-54.1149	1166.54	127.532	185.952	991.336	241.126	-147.971	981.609	248.811	9.8509	958.748	175.262	309.146	694.425	287.238	268.169	727.859	48.2709	203.011	743.939	62.8143	216.316	762.002	-11.76	202.375	730.487	-100.838	-252.486	675.089	267.765	-225.634	727.722	20.3838	-160.265	742.493	38.58	-178.732	760.323	-37.0964	-145.223	730.53	-120.945
280	2.79	15.943	1159.92	87.0511	88.4993	1157.06	130.995	-54.1129	1166.54	127.567	185.94	991.33	241.094	-147.988	981.609	248.769	9.83857	958.703	175.248	309.147	694.431	287.219	268.13	727.862	48.2266	202.987	743.91	62.8376	216.314	761.991	-11.7635	202.353	730.464	-100.84	-252.49	675.068	267.745	-225.643	727.725	20.3771	-160.28	742.486	38.5802	-178.738	760.251	-37.0017	-145.238	730.505	-120.896
281	2.8	15.9275	1159.84	87.1786	88.4866	1157.02	131.027	-54.1333	1166.5	127.627	185.925	991.298	241.092	-148.017	981.584	248.775	9.79649	958.601	175.317	309.142	694.448	287.232	268.098	727.844	48.2149	202.942	743.844	62.8506	216.283	761.949	-11.7689	202.322	730.379	-100.754	-252.503	675.017	267.694	-225.644	727.695	20.3886	-160.297	742.432	38.6108	-178.759	760.119	-36.8433	-145.251	730.425	-120.82
282	2.81	15.9425	1159.76	87.3443	88.4928	1156.96	131.099	-54.1536	1166.46	127.704	185.912	991.25	241.109	-148.033	981.515	248.804	9.76965	958.49	175.436	309.141	694.441	287.282	268.082	727.803	48.2403	202.926	743.788	62.8833	216.274	761.897	-11.6988	202.333	730.271	-100.604	-252.512	674.957	267.656	-225.65	727.631	20.4304	-160.316	742.385	38.6345	-178.775	760.063	-36.8233	-145.268	730.403	-120.828
283	2.82	15.9431	1159.72	87.4513	88.4958	1156.93	131.181	-54.1606	1166.44	127.752	185.894	991.214	241.109	-148.034	981.48	248.826	9.75357	958.427	175.53	309.132	694.41	287.287	268.081	727.778	48.2998	202.916	743.761	62.8987	216.3	761.875	-11.6238	202.329	730.225	-100.54	-252.517	674.923	267.675	-225.68	727.591	20.4847	-160.351	742.354	38.6566	-178.783	760.042	-36.7927	-145.302	730.332	-120.707
284	2.83	15.9633	1159.76	87.4364	88.5118	1156.93	131.166	-54.1484	1166.46	127.715	185.895	991.208	241.089	-148.025	981.466	248.774	9.76688	958.445	175.436	309.13	694.383	287.267	268.114	727.784	48.3087	202.935	743.773	62.8925	216.331	761.878	-11.6066	202.334	730.249	-100.563	-252.489	674.914	267.675	-225.672	727.594	20.4676	-160.356	742.361	38.6584	-178.803	760.102	-36.8581	-145.297	730.323	-120.684
285	2.84	16.0152	1159.82	87.3404	88.552	1156.95	131.164	-54.0841	1166.5	127.655	185.907	991.217	241.092	-147.996	981.47	248.748	9.81795	958.503	175.273	309.135	694.385	287.267	268.144	727.816	48.288	202.976	743.804	62.8761	216.377	761.897	-11.6099	202.38	730.297	-100.626	-252.422	674.917	267.68	-225.631	727.633	20.4143	-160.311	742.401	38.6198	-178.792	760.251	-37.0757	-145.262	730.328	-120.712
286	2.85	16.0533	1159.89	87.2632	88.5663	1156.99	131.134	-54.0659	1166.54	127.602	185.923	991.222	241.089	-147.974	981.486	248.744	9.83685	958.563	175.157	309.129	694.383	287.273	268.161	727.849	48.2731	203.002	743.86	62.8614	216.407	761.934	-11.6396	202.39	730.392	-100.757	-252.372	674.926	267.699	-225.618	727.675	20.4144	-160.26	742.44	38.5949	-178.802	760.348	-37.1984	-145.246	730.372	-120.716
287	2.86	16.0108	1159.99	87.1643	88.5289	1157.07	131.062	-54.0949	1166.58	127.572	185.896	991.229	241.097	-147.997	981.511	248.74	9.79466	958.634	175.056	309.085	694.371	287.264	268.146	727.856	48.2769	202.997	743.904	62.8402	216.35	761.976	-11.7461	202.355	730.493	-100.852	-252.356	674.873	267.686	-225.645	727.713	20.4507	-160.265	742.48	38.5967	-178.777	760.356	-37.1489	-145.268	730.416	-120.728
288	2.87	15.9456	1160.04	87.0639	88.4705	1157.11	131.033	-54.1267	1166.59	127.552	185.85	991.22	241.104	-148.045	981.496	248.723	9.75895	958.625	175.024	309.032	694.353	287.272	268.114	727.838	48.2918	202.96	743.921	62.8136	216.257	762.034	-11.8428	202.316	730.513	-100.858	-252.354	674.806	267.664	-225.68	727.733	20.4198	-160.304	742.496	38.5881	-178.778	760.308	-37.0708	-145.296	730.45	-120.756
289	2.88	15.9075	1160.01	87.1091	88.4472	1157.11	131.039	-54.1557	1166.58	127.574	185.816	991.191	241.088	-148.073	981.459	248.711	9.71972	958.557	175.049	309.008	694.345	287.285	268.074	727.806	48.295	202.912	743.887	62.8214	216.24	762.033	-11.8144	202.288	730.483	-100.824	-252.376	674.779	267.665	-225.7	727.726	20.4013	-160.338	742.475	38.584	-178.799	760.205	-36.9656	-145.312	730.45	-120.775
290	2.89	15.9088	1159.93	87.2866	88.4271	1157.07	131.088	-54.1816	1166.54	127.608	185.807	991.167	241.099	-148.08	981.431	248.687	9.69395	958.476	175.108	309.004	694.35	287.278	268.051	727.796	48.3105	202.897	743.832	62.8586	216.282	761.987	-11.7506	202.287	730.396	-100.734	-252.391	674.756	267.636	-225.697	727.704	20.4187	-160.347	742.428	38.6281	-178.814	760.099	-36.8205	-145.307	730.444	-120.815
291	2.9	15.9273	1159.85	87.3424	88.4388	1157.01	131.158	-54.1782	1166.49	127.636	185.815	991.136	241.093	-148.066	981.386	248.651	9.72053	958.384	175.161	309.007	694.347	287.279	268.051	727.785	48.2794	202.914	743.771	62.8943	216.355	761.925	-11.7061	202.33	730.311	-100.665	-252.389	674.734	267.591	-225.674	727.664	20.3934	-160.337	742.387	38.6312	-178.818	760.041	-36.7743	-145.266	730.474	-120.921
292	2.91	15.9707	1159.8	87.3955	88.4833	1156.97	131.209	-54.1422	1166.45	127.646	185.83	991.098	241.09	-148.036	981.342	248.674	9.78651	958.319	175.24	309.006	694.308	287.288	268.085	727.772	48.2946	202.962	743.72	62.9026	216.451	761.845	-11.5855	202.407	730.232	-100.589	-252.371	674.732	267.622	-225.631	727.614	20.4138	-160.3	742.366	38.6306	-178.787	760.092	-36.9069	-145.223	730.411	-120.872
293	2.92	15.9883	1159.83	87.4261	88.5202	1156.97	131.254	-54.136	1166.46	127.628	185.84	991.078	241.119	-148.023	981.315	248.7	9.83638	958.332	175.252	308.994	694.248	287.281	268.127	727.795	48.3418	203.002	743.727	62.9216	216.475	761.821	-11.5482	202.464	730.231	-100.526	-252.352	674.74	267.658	-225.608	727.617	20.4621	-160.272	742.376	38.6306	-178.777	760.233	-37.0333	-145.21	730.331	-120.736
294	2.93	15.9604	1159.88	87.3531	88.5	1157.01	131.229	-54.1726	1166.49	127.617	185.833	991.076	241.112	-148.032	981.318	248.704	9.827	958.406	175.175	308.967	694.213	287.288	268.144	727.828	48.3483	203.009	743.779	62.9283	216.467	761.839	-11.5812	202.468	730.304	-100.572	-252.322	674.73	267.687	-225.619	727.633	20.4672	-160.263	742.415	38.6162	-178.766	760.325	-37.0833	-145.226	730.328	-120.695
295	2.94	15.8963	1159.95	87.232	88.451	1157.08	131.13	-54.2077	1166.53	127.579	185.809	991.085	241.082	-148.045	981.323	248.641	9.80306	958.485	175.014	308.938	694.215	287.3	268.141	727.827	48.3096	202.994	743.826	62.9017	216.437	761.889	-11.6109	202.428	730.387	-100.697	-252.284	674.717	267.688	-225.62	727.661	20.4426	-160.264	742.446	38.595	-178.755	760.391	-37.1746	-145.252	730.36	-120.722
296	2.95	15.8126	1160.05	87.0256	88.3923	1157.14	131.038	-54.2603	1166.56	127.538	185.778	991.105	241.051	-148.064	981.341	248.593	9.76231	958.516	174.899	308.907	694.246	287.292	268.122	727.846	48.2722	202.971	743.877	62.8683	216.359	761.946	-11.7146	202.372	730.472	-100.816	-252.267	674.708	267.691	-225.646	727.709	20.4227	-160.279	742.45	38.5963	-178.76	760.358	-37.1246	-145.281	730.408	-120.744
297	2.96	15.7089	1160.1	86.9264	88.3027	1157.18	130.977	-54.3462	1166.58	127.51	185.73	991.112	241.039	-148.105	981.344	248.599	9.6736	958.499	174.905	308.869	694.254	287.281	268.081	727.843	48.2922	202.912	743.888	62.8579	216.256	762.016	-11.8337	202.305	730.528	-100.859	-252.301	674.663	267.645	-225.693	727.741	20.4175	-160.342	742.462	38.626	-178.79	760.236	-36.9255	-145.326	730.451	-120.714
298	2.97	15.6304	1160.06	86.9336	88.2361	1157.15	130.965	-54.4174	1166.56	127.507	185.682	991.08	241.043	-148.156	981.311	248.592	9.60533	958.424	174.931	308.843	694.234	287.303	268.049	727.808	48.313	202.87	743.857	62.8633	216.198	762.053	-11.8643	202.258	730.519	-100.858	-252.346	674.605	267.623	-225.735	727.712	20.4523	-160.391	742.453	38.6673	-178.809	760.124	-36.8212	-145.349	730.454	-120.713
299	2.98	15.6113	1159.96	87.0401	88.205	1157.1	130.976	-54.4624	1166.51	127.54	185.671	991.026	241.049	-148.172	981.264	248.605	9.57948	958.333	174.956	308.832	694.218	287.333	268.026	727.773	48.3306	202.871	743.809	62.8605	216.214	762.028	-11.793	202.26	730.433	-100.788	-252.364	674.559	267.589	-225.728	727.67	20.457	-160.399	742.42	38.6794	-178.805	760.061	-36.7879	-145.348	730.415	-120.693
300	2.99	15.6321	1159.86	87.1958	88.2085	1157.05	131.006	-54.4426	1166.46	127.629	185.68	990.997	241.044	-148.157	981.242	248.638	9.60951	958.22	175.043	308.861	694.214	287.367	268.04	727.774	48.3651	202.886	743.753	62.8916	216.309	761.931	-11.6747	202.317	730.304	-100.62	-252.355	674.567	267.604	-225.692	727.635	20.4512	-160.368	742.384	38.7051	-178.814	760.088	-36.8178	-145.317	730.345	-120.644
301	3	15.6761	1159.79	87.2654	88.2616	1157.01	131.022	-54.4045	1166.43	127.628	185.692	990.976	240.985	-148.137	981.203	248.625	9.69452	958.095	175.093	308.9	694.203	287.308	268.083	727.795	48.3398	202.94	743.712	62.8966	216.402	761.858	-11.6114	202.407	730.217	-100.496	-252.343	674.598	267.646	-225.653	727.616	20.4306	-160.316	742.372	38.6704	-178.824	760.163	-36.9587	-145.264	730.311	-120.637
302	3.01	15.726	1159.78	87.1914	88.3059	1157	130.996	-54.3676	1166.42	127.563	185.697	990.952	240.938	-148.116	981.187	248.582	9.7693	958.046	175.012	308.916	694.183	287.251	268.134	727.822	48.3107	202.999	743.725	62.8685	216.476	761.821	-11.5582	202.495	730.198	-100.482	-252.314	674.616	267.646	-225.616	727.613	20.4053	-160.261	742.373	38.6212	-178.79	760.251	-37.1072	-145.218	730.296	-120.668
303	3.02	15.7171	1159.84	87.1024	88.3062	1157.03	130.965	-54.3779	1166.44	127.513	185.684	990.937	240.945	-148.116	981.181	248.551	9.78382	958.064	174.904	308.917	694.182	287.255	268.141	727.836	48.3042	203.033	743.755	62.8715	216.501	761.833	-11.5591	202.521	730.242	-100.523	-252.293	674.599	267.631	-225.597	727.626	20.4149	-160.237	742.406	38.595	-178.778	760.342	-37.1578	-145.198	730.364	-120.764
304	3.03	15.6253	1159.94	86.9478	88.2381	1157.09	130.914	-54.4401	1166.48	127.498	185.632	990.95	241.001	-148.181	981.157	248.549	9.71778	958.101	174.825	308.879	694.201	287.303	268.091	727.835	48.3088	203.003	743.802	62.884	216.424	761.916	-11.6505	202.446	730.329	-100.616	-252.306	674.52	267.606	-225.638	727.662	20.4111	-160.262	742.436	38.6247	-178.822	760.33	-37.0787	-145.236	730.457	-120.841
305	3.04	15.4955	1160.05	86.7703	88.1307	1157.15	130.821	-54.5237	1166.53	127.447	185.558	990.979	241.014	-148.259	981.146	248.492	9.61264	958.136	174.721	308.831	694.218	287.325	268.046	727.816	48.3158	202.93	743.843	62.8654	216.31	761.987	-11.7568	202.347	730.457	-100.804	-252.327	674.426	267.559	-225.703	727.69	20.4146	-160.334	742.455	38.6348	-178.84	760.254	-36.9888	-145.304	730.444	-120.754
306	3.05	15.4193	1160.1	86.6553	88.0844	1157.18	130.761	-54.5933	1166.54	127.414	185.524	990.995	241.012	-148.292	981.145	248.467	9.52852	958.154	174.628	308.825	694.23	287.291	268.039	727.808	48.3267	202.874	743.854	62.8522	216.239	762.033	-11.8406	202.276	730.522	-100.908	-252.319	674.339	267.493	-225.733	727.708	20.4194	-160.388	742.464	38.656	-178.848	760.18	-36.9156	-145.35	730.478	-120.763
307	3.06	15.3946	1160.07	86.6886	88.0666	1157.16	130.764	-54.6333	1166.53	127.416	185.509	991.005	241.022	-148.311	981.116	248.473	9.49488	958.147	174.616	308.836	694.24	287.269	268.036	727.8	48.3405	202.844	743.848	62.8747	216.23	762.037	-11.859	202.262	730.523	-100.884	-252.304	674.307	267.501	-225.75	727.711	20.4307	-160.41	742.447	38.6602	-178.853	760.087	-36.7397	-145.361	730.479	-120.75
308	3.07	15.412	1160.02	86.74	88.0774	1157.13	130.801	-54.6254	1166.49	127.426	185.503	990.995	241.061	-148.302	981.079	248.468	9.50425	958.104	174.647	308.82	694.228	287.289	268.038	727.793	48.3582	202.871	743.828	62.9148	216.239	762.013	-11.8285	202.285	730.489	-100.834	-252.297	674.301	267.546	-225.735	727.697	20.4376	-160.397	742.422	38.679	-178.842	760.076	-36.7074	-145.334	730.445	-120.694
309	3.08	15.4846	1159.96	86.7787	88.1261	1157.09	130.821	-54.5817	1166.46	127.369	185.522	990.96	241.087	-148.27	981.025	248.486	9.58727	958.02	174.727	308.805	694.212	287.33	268.071	727.787	48.3464	202.94	743.801	62.949	216.33	761.954	-11.7334	202.375	730.409	-100.732	-252.258	674.3	267.578	-225.684	727.658	20.4516	-160.336	742.412	38.6672	-178.794	760.149	-36.8185	-145.286	730.399	-120.684
310	3.09	15.5481	1159.88	86.9144	88.1711	1157.03	130.868	-54.5325	1166.42	127.378	185.541	990.907	241.086	-148.243	980.987	248.501	9.65765	957.951	174.794	308.823	694.169	287.349	268.103	727.784	48.3789	202.991	743.764	62.9597	216.453	761.872	-11.591	202.455	730.337	-100.656	-252.217	674.315	267.628	-225.646	727.624	20.4651	-160.292	742.395	38.6653	-178.79	760.288	-36.9699	-145.253	730.36	-120.673
311	3.1	15.5601	1159.82	86.9949	88.1737	1157	130.871	-54.5369	1166.37	127.407	185.541	990.882	241.088	-148.241	980.964	248.479	9.68058	957.876	174.844	308.835	694.122	287.312	268.098	727.794	48.3911	203.009	743.724	62.969	216.499	761.822	-11.5737	202.492	730.276	-100.565	-252.184	674.317	267.655	-225.621	727.606	20.4573	-160.269	742.379	38.6484	-178.811	760.333	-37.0408	-145.227	730.327	-120.669
312	3.11	15.5342	1159.79	86.9916	88.1462	1156.99	130.86	-54.5515	1166.34	127.382	185.536	990.867	241.077	-148.25	980.94	248.44	9.67103	957.793	174.904	308.821	694.11	287.285	268.088	727.795	48.3677	202.986	743.675	62.9461	216.493	761.782	-11.5883	202.502	730.215	-100.489	-252.169	674.28	267.633	-225.614	727.593	20.4454	-160.286	742.346	38.6522	-178.819	760.315	-37.0528	-145.221	730.286	-120.652
313	3.12	15.4792	1159.75	87.026	88.0869	1157	130.843	-54.6092	1166.32	127.393	185.502	990.867	241.07	-148.283	980.939	248.412	9.61012	957.734	174.957	308.798	694.131	287.283	268.058	727.795	48.3255	202.948	743.664	62.9328	216.44	761.786	-11.6035	202.461	730.188	-100.483	-252.158	674.236	267.577	-225.636	727.598	20.4308	-160.304	742.333	38.6706	-178.822	760.255	-37.0193	-145.254	730.286	-120.626
314	3.13	15.3622	1159.82	86.9557	87.9882	1157.05	130.806	-54.707	1166.34	127.425	185.44	990.881	241.081	-148.339	980.951	248.401	9.49836	957.766	174.851	308.747	694.144	287.307	267.999	727.792	48.3082	202.887	743.7	62.9201	216.352	761.862	-11.6632	202.351	730.265	-100.58	-252.167	674.171	267.529	-225.705	727.631	20.4393	-160.371	742.337	38.6987	-178.868	760.155	-36.8833	-145.331	730.343	-120.662
315	3.14	15.2673	1159.95	86.7879	87.9101	1157.12	130.751	-54.7773	1166.41	127.418	185.375	990.909	241.101	-148.39	980.952	248.382	9.40088	957.87	174.611	308.672	694.117	287.331	267.95	727.783	48.3228	202.829	743.766	62.8776	216.251	761.963	-11.7425	202.245	730.41	-100.751	-252.172	674.096	267.499	-225.77	727.669	20.4429	-160.432	742.374	38.684	-178.916	760.127	-36.8373	-145.404	730.432	-120.707
316	3.15	15.264	1160.07	86.6768	87.9144	1157.18	130.716	-54.7852	1166.48	127.388	185.368	990.919	241.097	-148.392	980.954	248.381	9.40266	957.943	174.458	308.649	694.099	287.341	267.978	727.8	48.3134	202.823	743.811	62.8337	216.205	762.03	-11.8254	202.22	730.525	-100.913	-252.128	674.081	267.532	-225.781	727.713	20.4282	-160.437	742.438	38.6483	-178.897	760.175	-36.9317	-145.41	730.483	-120.717
317	3.16	15.3064	1160.12	86.6496	87.9473	1157.22	130.737	-54.7444	1166.51	127.353	185.406	990.917	241.113	-148.337	980.95	248.364	9.47993	957.971	174.426	308.657	694.096	287.342	268.045	727.821	48.3277	202.868	743.851	62.8335	216.232	762.048	-11.8473	202.278	730.562	-100.933	-252.098	674.108	267.589	-225.737	727.756	20.4066	-160.378	742.466	38.6272	-178.835	760.229	-36.9407	-145.361	730.481	-120.706
318	3.17	15.3639	1160.12	86.6906	88.0037	1157.23	130.762	-54.6846	1166.51	127.381	185.452	990.888	241.121	-148.288	980.935	248.358	9.56287	957.933	174.476	308.691	694.108	287.36	268.093	727.832	48.3065	202.925	743.864	62.8536	216.312	762.02	-11.7947	202.371	730.516	-100.874	-252.063	674.16	267.653	-225.678	727.746	20.391	-160.306	742.446	38.6251	-178.77	760.26	-36.9178	-145.303	730.452	-120.721
319	3.18	15.4369	1160.05	86.8126	88.069	1157.18	130.824	-54.6182	1166.48	127.382	185.484	990.839	241.128	-148.252	980.898	248.387	9.66465	957.805	174.643	308.714	694.076	287.357	268.111	727.826	48.3113	202.983	743.816	62.8785	216.413	761.948	-11.6676	202.466	730.417	-100.751	-252.034	674.158	267.651	-225.62	727.692	20.405	-160.249	742.422	38.6208	-178.759	760.303	-36.9798	-145.251	730.446	-120.77
320	3.19	15.4618	1159.96	87.0034	88.0954	1157.11	130.938	-54.6034	1166.46	127.45	185.493	990.792	241.151	-148.244	980.854	248.464	9.69763	957.67	174.84	308.727	694.02	287.324	268.094	727.825	48.3414	203.007	743.735	62.9264	216.486	761.878	-11.5784	202.51	730.311	-100.597	-252.055	674.133	267.641	-225.591	727.643	20.4445	-160.232	742.395	38.6388	-178.776	760.267	-36.9433	-145.214	730.487	-120.873
321	3.2	15.4342	1159.88	87.1802	88.0761	1157.07	130.987	-54.6314	1166.42	127.593	185.477	990.747	241.171	-148.262	980.811	248.501	9.65652	957.549	174.976	308.723	693.986	287.312	268.065	727.8	48.3823	202.973	743.665	62.9608	216.503	761.831	-11.5506	202.51	730.207	-100.423	-252.099	674.101	267.642	-225.611	727.618	20.4787	-160.261	742.343	38.661	-178.795	760.158	-36.7887	-145.206	730.437	-120.807
322	3.21	15.398	1159.84	87.2271	88.0478	1157.05	130.992	-54.6544	1166.42	127.615	185.459	990.727	241.156	-148.281	980.795	248.485	9.60871	957.49	175.046	308.701	693.977	287.297	268.033	727.769	48.3825	202.917	743.636	62.9489	216.485	761.839	-11.5505	202.466	730.153	-100.397	-252.136	674.067	267.573	-225.633	727.615	20.4666	-160.293	742.316	38.6704	-178.82	760.081	-36.698	-145.244	730.366	-120.708
323	3.22	15.3566	1159.91	87.1694	88.0267	1157.1	130.981	-54.6878	1166.47	127.605	185.451	990.746	241.117	-148.293	980.811	248.469	9.56177	957.515	175.003	308.674	694.011	287.294	268.01	727.777	48.3281	202.901	743.667	62.9512	216.415	761.889	-11.6259	202.41	730.194	-100.481	-252.141	674.044	267.501	-225.666	727.63	20.4418	-160.324	742.329	38.6868	-178.85	760.067	-36.6921	-145.289	730.381	-120.716
324	3.23	15.3216	1160.06	87.0099	88.0048	1157.16	130.932	-54.7063	1166.54	127.588	185.437	990.793	241.112	-148.301	980.838	248.462	9.50862	957.633	174.798	308.646	694.03	287.326	267.994	727.797	48.2963	202.881	743.742	62.9483	216.319	761.964	-11.7209	202.346	730.345	-100.66	-252.118	674.061	267.547	-225.696	727.682	20.403	-160.341	742.387	38.6761	-178.856	760.13	-36.7731	-145.314	730.426	-120.723
325	3.24	15.3419	1160.19	86.8777	88.0023	1157.24	130.894	-54.6931	1166.63	127.55	185.425	990.821	241.138	-148.284	980.864	248.493	9.5017	957.79	174.618	308.616	694.023	287.369	268.031	727.82	48.3208	202.88	743.819	62.905	216.254	762.013	-11.7684	202.322	730.499	-100.827	-252.083	674.077	267.655	-225.721	727.742	20.4158	-160.351	742.428	38.6697	-178.839	760.241	-36.8803	-145.329	730.469	-120.703
326	3.25	15.3861	1160.28	86.7919	88.0289	1157.29	130.901	-54.6531	1166.67	127.534	185.435	990.801	241.157	-148.25	980.861	248.52	9.53659	957.863	174.522	308.596	693.988	287.386	268.068	727.825	48.3808	202.907	743.855	62.8795	216.275	762.011	-11.7984	202.346	730.589	-100.929	-252.056	674.073	267.687	-225.729	727.76	20.4307	-160.35	742.442	38.6624	-178.823	760.367	-37.0581	-145.329	730.494	-120.717
327	3.26	15.4236	1160.29	86.8401	88.0622	1157.29	130.95	-54.6233	1166.67	127.568	185.438	990.757	241.167	-148.231	980.838	248.527	9.57012	957.84	174.546	308.589	693.944	287.394	268.082	727.813	48.3969	202.917	743.843	62.8986	216.322	761.988	-11.7729	202.348	730.6	-100.953	-252.065	674.051	267.676	-225.715	727.741	20.4464	-160.342	742.424	38.6461	-178.813	760.374	-37.0725	-145.329	730.464	-120.678
328	3.27	15.4491	1160.19	86.9989	88.1014	1157.24	131.034	-54.5869	1166.59	127.655	185.445	990.716	241.18	-148.229	980.805	248.557	9.59768	957.679	174.711	308.605	693.93	287.391	268.059	727.771	48.3849	202.921	743.767	62.9287	216.377	761.936	-11.6692	202.358	730.466	-100.843	-252.079	674.041	267.672	-225.687	727.69	20.4325	-160.329	742.369	38.6577	-178.829	760.278	-36.9632	-145.321	730.396	-120.654
329	3.28	15.4911	1160.05	87.2429	88.1406	1157.16	131.109	-54.5695	1166.52	127.745	185.457	990.677	241.175	-148.218	980.774	248.585	9.6105	957.469	174.925	308.643	693.909	287.336	268.033	727.747	48.413	202.904	743.672	62.9486	216.429	761.869	-11.5719	202.388	730.291	-100.635	-252.089	674.04	267.62	-225.672	727.624	20.4246	-160.327	742.292	38.7072	-178.852	760.126	-36.8059	-145.297	730.326	-120.626
330	3.29	15.5192	1159.95	87.4521	88.1448	1157.09	131.196	-54.5654	1166.49	127.841	185.447	990.628	241.178	-148.237	980.758	248.583	9.59062	957.337	175.063	308.661	693.884	287.268	268.002	727.739	48.4308	202.88	743.606	62.9687	216.46	761.801	-11.5103	202.418	730.156	-100.416	-252.102	674.02	267.553	-225.671	727.579	20.4625	-160.357	742.264	38.7139	-178.88	760.044	-36.711	-145.308	730.3	-120.595
331	3.3	15.5334	1159.95	87.4995	88.1456	1157.09	131.194	-54.5462	1166.5	127.858	185.429	990.602	241.181	-148.261	980.739	248.58	9.57549	957.292	175.102	308.649	693.848	287.242	267.976	727.746	48.3934	202.86	743.583	62.9927	216.469	761.797	-11.5029	202.406	730.122	-100.375	-252.107	674.007	267.586	-225.692	727.572	20.5097	-160.367	742.263	38.7385	-178.911	760.057	-36.7243	-145.328	730.349	-120.664
332	3.31	15.5828	1160.04	87.4164	88.1867	1157.13	131.169	-54.4768	1166.58	127.793	185.441	990.612	241.193	-148.242	980.746	248.585	9.59109	957.344	175.007	308.641	693.845	287.285	267.989	727.766	48.3931	202.898	743.627	62.9872	216.474	761.836	-11.5274	202.395	730.197	-100.457	-252.075	674.017	267.635	-225.671	727.608	20.5042	-160.325	742.312	38.7113	-178.885	760.114	-36.7831	-145.289	730.459	-120.815
333	3.32	15.6499	1160.2	87.249	88.2294	1157.21	131.149	-54.3972	1166.67	127.698	185.485	990.635	241.183	-148.185	980.772	248.571	9.64819	957.454	174.879	308.635	693.855	287.323	268.039	727.798	48.3891	202.949	743.715	62.9441	216.452	761.886	-11.6033	202.425	730.324	-100.599	-252.026	674.009	267.607	-225.64	727.673	20.4631	-160.279	742.378	38.6594	-178.846	760.243	-36.9133	-145.269	730.508	-120.839
334	3.33	15.689	1160.32	87.0961	88.2665	1157.29	131.099	-54.3494	1166.75	127.637	185.503	990.665	241.161	-148.157	980.798	248.524	9.68265	957.58	174.728	308.607	693.856	287.352	268.073	727.819	48.3699	202.984	743.809	62.926	216.417	761.956	-11.7008	202.442	730.488	-100.784	-251.979	674.004	267.632	-225.644	727.757	20.4312	-160.257	742.432	38.6275	-178.809	760.34	-37.014	-145.279	730.493	-120.763
335	3.34	15.7058	1160.39	86.9713	88.2974	1157.32	131.084	-54.3382	1166.79	127.587	185.516	990.678	241.143	-148.143	980.808	248.503	9.68119	957.659	174.604	308.572	693.852	287.386	268.092	727.822	48.4115	202.978	743.861	62.8964	216.397	762.002	-11.7357	202.431	730.597	-100.914	-251.951	673.999	267.675	-225.664	727.801	20.428	-160.264	742.455	38.6155	-178.775	760.383	-37.0281	-145.297	730.511	-120.726
336	3.35	15.7178	1160.39	87.006	88.3015	1157.32	131.086	-54.3447	1166.76	127.606	185.519	990.652	241.141	-148.137	980.781	248.488	9.66827	957.628	174.619	308.548	693.828	287.408	268.089	727.815	48.4408	202.953	743.843	62.909	216.36	762.014	-11.7339	202.398	730.575	-100.905	-251.94	673.945	267.661	-225.668	727.775	20.4266	-160.294	742.441	38.6507	-178.782	760.347	-36.9892	-145.326	730.505	-120.7
337	3.36	15.712	1160.29	87.1652	88.2802	1157.28	131.096	-54.3731	1166.7	127.686	185.494	990.605	241.134	-148.161	980.732	248.488	9.64126	957.5	174.725	308.517	693.788	287.407	268.043	727.76	48.4739	202.908	743.775	62.9625	216.341	761.99	-11.7008	202.364	730.464	-100.785	-251.988	673.884	267.642	-225.696	727.716	20.4614	-160.32	742.368	38.6827	-178.825	760.205	-36.8503	-145.36	730.438	-120.676
338	3.37	15.6987	1160.17	87.2935	88.2845	1157.2	131.126	-54.3896	1166.64	127.732	185.484	990.557	241.105	-148.176	980.68	248.462	9.63642	957.351	174.885	308.511	693.741	287.355	267.997	727.717	48.462	202.872	743.688	62.9719	216.377	761.926	-11.6229	202.367	730.311	-100.609	-252.033	673.851	267.59	-225.714	727.651	20.4696	-160.341	742.293	38.7054	-178.852	760.054	-36.6701	-145.355	730.368	-120.658
339	3.38	15.727	1160.08	87.3782	88.3054	1157.14	131.156	-54.3588	1166.6	127.718	185.498	990.522	241.055	-148.16	980.662	248.413	9.67051	957.253	174.975	308.539	693.718	287.302	267.981	727.726	48.4133	202.877	743.615	62.9589	216.437	761.871	-11.5698	202.408	730.207	-100.494	-252.029	673.886	267.56	-225.692	727.628	20.4281	-160.331	742.272	38.7273	-178.855	760.022	-36.6891	-145.325	730.353	-120.687
340	3.39	15.784	1160.02	87.4512	88.3378	1157.11	131.169	-54.3151	1166.61	127.698	185.519	990.513	241.042	-148.14	980.676	248.381	9.71065	957.217	174.986	308.557	693.688	287.26	267.995	727.757	48.4002	202.909	743.604	62.9902	216.471	761.838	-11.552	202.439	730.185	-100.461	-252.02	673.943	267.552	-225.663	727.63	20.4179	-160.305	742.291	38.7073	-178.867	760.082	-36.7808	-145.294	730.428	-120.79
341	3.4	15.8194	1160.03	87.3998	88.3773	1157.12	131.151	-54.2673	1166.63	127.646	185.542	990.509	241.029	-148.114	980.701	248.366	9.74432	957.274	174.893	308.535	693.65	287.235	268.029	727.792	48.4006	202.947	743.623	63.0093	216.512	761.828	-11.5311	202.486	730.216	-100.463	-252.011	674.002	267.628	-225.642	727.648	20.4525	-160.276	742.324	38.6716	-178.858	760.205	-36.8785	-145.276	730.457	-120.789
342	3.41	15.853	1160.11	87.2893	88.4091	1157.16	131.102	-54.2307	1166.67	127.581	185.558	990.498	241.041	-148.079	980.717	248.37	9.78311	957.356	174.771	308.531	693.626	287.274	268.069	727.812	48.3951	202.966	743.684	62.9642	216.523	761.848	-11.5373	202.517	730.276	-100.523	-251.98	674.01	267.657	-225.619	727.673	20.4675	-160.244	742.371	38.6292	-178.851	760.335	-37.0363	-145.253	730.421	-120.705
343	3.42	15.808	1160.22	87.06	88.3891	1157.23	130.987	-54.2381	1166.68	127.568	185.564	990.496	241.052	-148.064	980.722	248.376	9.78827	957.42	174.706	308.501	693.638	287.355	268.068	727.803	48.3943	202.956	743.762	62.9486	216.465	761.908	-11.5914	202.466	730.379	-100.69	-251.946	673.995	267.706	-225.629	727.692	20.4752	-160.249	742.393	38.6387	-178.838	760.357	-37.0685	-145.259	730.461	-120.754
344	3.43	15.717	1160.28	86.9038	88.3395	1157.26	130.918	-54.3195	1166.68	127.504	185.552	990.489	241.069	-148.086	980.726	248.38	9.7269	957.439	174.703	308.456	693.632	287.36	268.043	727.783	48.4423	202.911	743.79	62.9481	216.377	761.977	-11.6853	202.38	730.462	-100.783	-251.953	673.936	267.672	-225.695	727.72	20.4769	-160.307	742.385	38.6598	-178.841	760.306	-36.9469	-145.311	730.526	-120.791
345	3.44	15.6747	1160.24	86.929	88.3118	1157.24	130.894	-54.3734	1166.65	127.504	185.539	990.472	241.05	-148.089	980.71	248.336	9.68832	957.405	174.74	308.444	693.616	287.384	268.029	727.763	48.48	202.875	743.76	62.9596	216.331	762	-11.702	202.322	730.448	-100.755	-251.966	673.889	267.608	-225.753	727.719	20.4711	-160.359	742.361	38.6981	-178.862	760.224	-36.8794	-145.38	730.459	-120.687
346	3.45	15.6477	1160.16	86.9541	88.2969	1157.2	130.884	-54.4055	1166.6	127.513	185.536	990.444	241.01	-148.082	980.687	248.284	9.6813	957.339	174.758	308.441	693.595	287.363	268.018	727.738	48.4467	202.865	743.73	62.9517	216.321	761.984	-11.7243	202.305	730.4	-100.716	-251.973	673.855	267.573	-225.757	727.682	20.4918	-160.381	742.319	38.7166	-178.883	760.148	-36.8386	-145.406	730.405	-120.653
347	3.46	15.6626	1160.1	86.9838	88.2983	1157.16	130.836	-54.3955	1166.53	127.53	185.542	990.405	240.995	-148.07	980.66	248.296	9.68365	957.298	174.764	308.433	693.537	287.321	268.006	727.731	48.4223	202.877	743.706	62.9631	216.358	761.952	-11.697	202.345	730.343	-100.656	-251.991	673.848	267.579	-225.734	727.641	20.4897	-160.382	742.282	38.7401	-178.899	760.11	-36.7842	-145.393	730.365	-120.629
348	3.47	15.7389	1160.01	87.0208	88.343	1157.1	130.826	-54.3426	1166.5	127.449	185.555	990.365	240.954	-148.056	980.638	248.314	9.74176	957.239	174.818	308.423	693.484	287.29	268.024	727.722	48.4516	202.91	743.668	62.9699	216.456	761.889	-11.5868	202.429	730.274	-100.609	-252.001	673.893	267.642	-225.692	727.61	20.4623	-160.35	742.271	38.6967	-178.883	760.114	-36.8072	-145.333	730.329	-120.637
349	3.48	15.7982	1159.97	86.9895	88.4108	1157.06	130.821	-54.2729	1166.5	127.358	185.578	990.359	240.91	-148.036	980.638	248.292	9.80897	957.222	174.811	308.425	693.481	287.269	268.057	727.743	48.4107	202.961	743.649	62.9537	216.53	761.836	-11.5398	202.495	730.252	-100.571	-251.998	673.934	267.647	-225.641	727.614	20.4584	-160.284	742.276	38.7006	-178.846	760.192	-36.9538	-145.275	730.326	-120.637
350	3.49	15.8049	1159.97	86.9394	88.4117	1157.06	130.774	-54.235	1166.53	127.322	185.592	990.395	240.898	-148.023	980.664	248.276	9.81776	957.235	174.787	308.425	693.495	287.236	268.06	727.784	48.383	202.973	743.663	62.9579	216.542	761.844	-11.5434	202.521	730.283	-100.539	-251.986	673.989	267.674	-225.613	727.657	20.4396	-160.255	742.326	38.6827	-178.809	760.284	-36.9852	-145.25	730.36	-120.647
351	3.5	15.7892	1159.98	86.9288	88.3899	1157.07	130.739	-54.2409	1166.57	127.306	185.584	990.434	240.885	-148.024	980.69	248.251	9.80202	957.246	174.792	308.431	693.526	287.25	268.052	727.809	48.41	202.962	743.687	62.9771	216.511	761.878	-11.5418	202.498	730.318	-100.56	-251.979	674.012	267.68	-225.615	727.691	20.4229	-160.25	742.382	38.6548	-178.808	760.284	-36.9162	-145.244	730.417	-120.676
352	3.51	15.7504	1160	86.8406	88.3756	1157.08	130.707	-54.2626	1166.59	127.279	185.568	990.428	240.873	-148.032	980.687	248.243	9.78275	957.259	174.768	308.405	693.552	287.326	268.045	727.8	48.4253	202.943	743.688	62.9839	216.444	761.905	-11.5969	202.46	730.347	-100.629	-251.987	673.95	267.62	-225.642	727.708	20.4114	-160.259	742.395	38.6504	-178.814	760.259	-36.917	-145.27	730.505	-120.771
353	3.52	15.6863	1160.03	86.7095	88.3321	1157.09	130.65	-54.312	1166.57	127.239	185.54	990.401	240.874	-148.057	980.653	248.246	9.7233	957.242	174.764	308.38	693.534	287.362	268.025	727.754	48.4671	202.908	743.7	62.9868	216.37	761.943	-11.6795	202.407	730.39	-100.697	-251.989	673.87	267.595	-225.695	727.705	20.4225	-160.291	742.37	38.6611	-178.829	760.219	-36.8593	-145.31	730.464	-120.691
354	3.53	15.6366	1160.02	86.6373	88.2973	1157.08	130.613	-54.36	1166.54	127.237	185.525	990.366	240.873	-148.083	980.618	248.253	9.66038	957.203	174.75	308.375	693.529	287.403	268.007	727.694	48.5102	202.864	743.679	62.9893	216.318	761.954	-11.7447	202.352	730.378	-100.7	-251.981	673.788	267.573	-225.733	727.706	20.4406	-160.338	742.345	38.6864	-178.87	760.123	-36.7557	-145.346	730.432	-120.659
355	3.54	15.6279	1159.97	86.6305	88.2953	1157.05	130.614	-54.3726	1166.5	127.233	185.511	990.338	240.827	-148.075	980.583	248.219	9.64406	957.162	174.76	308.392	693.526	287.396	268.015	727.667	48.5019	202.865	743.669	62.9943	216.325	761.954	-11.6957	202.332	730.349	-100.677	-251.97	673.747	267.548	-225.739	727.685	20.431	-160.368	742.318	38.7071	-178.891	760.139	-36.8189	-145.377	730.413	-120.632
356	3.55	15.6731	1159.92	86.6572	88.3063	1157.03	130.597	-54.364	1166.48	127.192	185.527	990.321	240.777	-148.058	980.564	248.203	9.66436	957.165	174.73	308.41	693.485	287.321	268.026	727.71	48.4774	202.883	743.674	62.9911	216.357	761.907	-11.6526	202.356	730.347	-100.699	-251.951	673.749	267.534	-225.72	727.664	20.4344	-160.371	742.313	38.6989	-178.886	760.229	-36.9655	-145.381	730.374	-120.636
357	3.56	15.7375	1159.89	86.7032	88.3461	1156.98	130.61	-54.3225	1166.45	127.192	185.547	990.308	240.775	-148.05	980.557	248.223	9.70995	957.165	174.698	308.394	693.439	287.263	268.039	727.737	48.4718	202.91	743.664	62.9889	216.424	761.853	-11.6158	202.43	730.32	-100.646	-251.935	673.783	267.591	-225.676	727.641	20.4691	-160.341	742.292	38.7044	-178.856	760.259	-36.9543	-145.348	730.335	-120.616
358	3.57	15.816	1159.86	86.7368	88.4129	1156.96	130.624	-54.2641	1166.43	127.142	185.561	990.307	240.764	-148.036	980.554	248.215	9.76641	957.142	174.707	308.402	693.441	287.298	268.055	727.751	48.4475	202.954	743.648	62.9793	216.503	761.842	-11.5598	202.528	730.276	-100.553	-251.922	673.79	267.609	-225.637	727.617	20.5094	-160.283	742.291	38.6862	-178.829	760.273	-36.9827	-145.293	730.312	-120.604
359	3.58	15.8294	1159.88	86.677	88.4283	1156.97	130.598	-54.2518	1166.44	127.103	185.551	990.327	240.729	-148.039	980.554	248.191	9.77921	957.139	174.684	308.391	693.46	287.295	268.045	727.774	48.4316	202.965	743.659	62.9551	216.52	761.848	-11.5491	202.548	730.294	-100.581	-251.933	673.791	267.592	-225.619	727.63	20.4954	-160.261	742.311	38.6599	-178.803	760.284	-36.9886	-145.281	730.348	-120.651
360	3.59	15.7675	1159.93	86.5988	88.3588	1157.01	130.539	-54.2899	1166.47	127.069	185.513	990.353	240.73	-148.076	980.569	248.175	9.71276	957.142	174.689	308.345	693.501	287.302	268.002	727.789	48.3985	202.926	743.685	62.9717	216.462	761.895	-11.5994	202.466	730.362	-100.675	-251.944	673.796	267.604	-225.651	727.674	20.4566	-160.288	742.339	38.6578	-178.808	760.227	-36.8371	-145.317	730.415	-120.676
361	3.6	15.6908	1159.95	86.5802	88.2948	1157.02	130.519	-54.3425	1166.49	127.075	185.48	990.374	240.734	-148.108	980.587	248.156	9.64902	957.129	174.751	308.334	693.583	287.385	267.967	727.78	48.3734	202.887	743.7	62.9822	216.4	761.946	-11.6366	202.383	730.405	-100.717	-251.93	673.786	267.606	-225.684	727.713	20.4434	-160.321	742.345	38.688	-178.853	760.131	-36.7566	-145.349	730.488	-120.742
362	3.61	15.6447	1159.94	86.547	88.271	1157.01	130.502	-54.3585	1166.49	127.075	185.474	990.392	240.719	-148.107	980.574	248.117	9.62945	957.12	174.739	308.334	693.614	287.393	267.969	727.757	48.3834	202.874	743.692	62.9803	216.354	761.963	-11.681	202.357	730.393	-100.709	-251.925	673.75	267.559	-225.706	727.719	20.4505	-160.347	742.336	38.7115	-178.87	760.095	-36.7582	-145.356	730.537	-120.804
363	3.62	15.6564	1159.92	86.5446	88.2703	1157.01	130.472	-54.3601	1166.48	127.064	185.477	990.368	240.706	-148.1	980.541	248.096	9.63238	957.101	174.731	308.338	693.579	287.374	267.977	727.726	48.4191	202.867	743.689	62.9618	216.348	761.974	-11.6949	202.363	730.366	-100.677	-251.925	673.698	267.528	-225.722	727.705	20.4547	-160.342	742.328	38.6979	-178.874	760.068	-36.6912	-145.354	730.46	-120.694
364	3.63	15.6968	1159.88	86.5681	88.2895	1157	130.486	-54.3538	1166.44	127.071	185.497	990.316	240.727	-148.084	980.497	248.098	9.66477	957.069	174.767	308.354	693.504	287.341	268.023	727.698	48.5028	202.885	743.672	62.9547	216.416	761.934	-11.6227	202.402	730.31	-100.599	-251.919	673.666	267.555	-225.706	727.655	20.4811	-160.331	742.309	38.6843	-178.858	760.098	-36.7292	-145.344	730.398	-120.647
365	3.64	15.7542	1159.84	86.6364	88.3468	1156.97	130.537	-54.3225	1166.42	127.059	185.525	990.29	240.719	-148.051	980.469	248.095	9.72685	957.055	174.803	308.382	693.461	287.335	268.086	727.699	48.563	202.937	743.652	62.9755	216.504	761.872	-11.5364	202.485	730.268	-100.546	-251.898	673.679	267.58	-225.663	727.628	20.4746	-160.301	742.305	38.6974	-178.832	760.206	-36.8856	-145.311	730.342	-120.62
366	3.65	15.7815	1159.83	86.6807	88.3688	1156.97	130.535	-54.3167	1166.42	127.033	185.535	990.301	240.709	-148.025	980.471	248.08	9.75262	957.067	174.764	308.379	693.443	287.309	268.094	727.737	48.5557	202.973	743.664	62.9821	216.526	761.86	-11.4997	202.536	730.276	-100.523	-251.884	673.713	267.61	-225.651	727.628	20.4642	-160.284	742.315	38.692	-178.813	760.307	-37.0073	-145.283	730.325	-120.61
367	3.66	15.7474	1159.86	86.6137	88.3321	1156.99	130.491	-54.3458	1166.41	127.008	185.503	990.33	240.701	-148.047	980.49	248.073	9.72525	957.076	174.753	308.344	693.453	287.272	268.065	727.775	48.4779	202.966	743.677	62.9749	216.499	761.882	-11.5388	202.501	730.328	-100.616	-251.912	673.74	267.609	-225.67	727.647	20.4541	-160.302	742.319	38.6653	-178.811	760.321	-36.9993	-145.291	730.343	-120.603
368	3.67	15.6802	1159.9	86.5252	88.2902	1157.02	130.477	-54.3741	1166.43	127.017	185.466	990.36	240.716	-148.087	980.502	248.066	9.69378	957.093	174.73	308.308	693.509	287.326	268.015	727.798	48.4018	202.925	743.698	62.9757	216.425	761.923	-11.6136	202.449	730.373	-100.672	-251.937	673.753	267.594	-225.681	727.662	20.4724	-160.299	742.343	38.6559	-178.826	760.248	-36.9062	-145.319	730.397	-120.614
369	3.68	15.6051	1159.92	86.4911	88.2235	1157.03	130.478	-54.4163	1166.45	126.999	185.431	990.38	240.729	-148.133	980.511	248.072	9.64285	957.09	174.722	308.269	693.589	287.422	267.969	727.805	48.3623	202.883	743.701	62.9733	216.327	761.978	-11.7146	202.379	730.398	-100.713	-251.949	673.73	267.556	-225.694	727.688	20.4767	-160.328	742.349	38.6967	-178.85	760.163	-36.8256	-145.346	730.459	-120.666
370	3.69	15.5319	1159.94	86.4876	88.1619	1157.03	130.483	-54.4765	1166.47	127.004	185.394	990.388	240.743	-148.169	980.507	248.095	9.58197	957.082	174.76	308.25	693.609	287.44	267.933	727.781	48.3796	202.85	743.691	62.9952	216.285	761.993	-11.7346	202.324	730.4	-100.722	-251.971	673.711	267.556	-225.734	727.715	20.4608	-160.362	742.35	38.7011	-178.906	760.099	-36.7334	-145.377	730.509	-120.725
371	3.7	15.5101	1159.9	86.5334	88.1449	1157.02	130.503	-54.4933	1166.47	127.008	185.405	990.397	240.751	-148.15	980.483	248.1	9.57218	957.065	174.833	308.28	693.613	287.42	267.924	727.752	48.4105	202.825	743.68	62.9913	216.308	761.976	-11.7021	202.323	730.378	-100.681	-251.957	673.699	267.548	-225.743	727.714	20.455	-160.363	742.342	38.7073	-178.915	760.059	-36.6524	-145.376	730.56	-120.803
372	3.71	15.5481	1159.88	86.5603	88.1815	1157	130.528	-54.468	1166.46	127.016	185.456	990.38	240.767	-148.094	980.462	248.093	9.61781	957.051	174.85	308.319	693.572	287.369	267.97	727.745	48.4643	202.849	743.663	62.9867	216.371	761.924	-11.66	202.381	730.334	-100.612	-251.915	673.673	267.534	-225.702	727.705	20.4382	-160.344	742.328	38.7188	-178.925	760.126	-36.7825	-145.345	730.478	-120.697
373	3.72	15.6178	1159.85	86.5919	88.2455	1156.97	130.589	-54.435	1166.41	127.049	185.491	990.345	240.789	-148.059	980.433	248.136	9.68291	957.063	174.85	308.334	693.485	287.325	268.027	727.74	48.5088	202.905	743.626	63.0079	216.452	761.87	-11.5835	202.464	730.307	-100.568	-251.892	673.653	267.558	-225.667	727.674	20.4559	-160.31	742.331	38.7088	-178.908	760.218	-36.9044	-145.313	730.429	-120.68
374	3.73	15.6801	1159.8	86.6581	88.2897	1156.94	130.612	-54.4181	1166.36	127.071	185.51	990.288	240.793	-148.048	980.396	248.148	9.74216	957.051	174.831	308.334	693.384	287.289	268.084	727.709	48.5312	202.942	743.606	63.0114	216.537	761.813	-11.5342	202.522	730.282	-100.557	-251.89	673.637	267.584	-225.65	727.631	20.477	-160.288	742.298	38.6911	-178.865	760.248	-36.9162	-145.28	730.362	-120.643
375	3.74	15.7084	1159.78	86.6832	88.3213	1156.92	130.643	-54.3946	1166.32	127.098	185.519	990.252	240.811	-148.024	980.367	248.16	9.77141	957.044	174.837	308.354	693.341	287.298	268.119	727.692	48.5556	202.963	743.586	63.0058	216.592	761.784	-11.4647	202.556	730.238	-100.502	-251.896	673.629	267.615	-225.64	727.594	20.515	-160.283	742.275	38.7016	-178.842	760.245	-36.9489	-145.275	730.311	-120.601
376	3.75	15.6852	1159.83	86.6581	88.2899	1156.96	130.637	-54.4153	1166.33	127.111	185.509	990.264	240.832	-148.048	980.379	248.137	9.74246	957.052	174.883	308.344	693.364	287.296	268.092	727.702	48.5532	202.945	743.596	63.0063	216.558	761.814	-11.4832	202.521	730.253	-100.509	-251.912	673.642	267.612	-225.659	727.609	20.518	-160.298	742.27	38.7335	-178.829	760.21	-36.8723	-145.309	730.31	-120.6
377	3.76	15.6181	1159.88	86.5977	88.2185	1157.01	130.6	-54.4687	1166.34	127.138	185.457	990.302	240.825	-148.099	980.412	248.122	9.67991	957.067	174.901	308.283	693.44	287.317	268.009	727.735	48.4723	202.897	743.637	63.0144	216.444	761.875	-11.5863	202.429	730.31	-100.602	-251.936	673.634	267.542	-225.696	727.65	20.5001	-160.334	742.276	38.7226	-178.852	760.126	-36.7478	-145.352	730.344	-120.608
378	3.77	15.567	1159.92	86.5541	88.172	1157.04	130.556	-54.508	1166.36	127.136	185.412	990.335	240.82	-148.134	980.438	248.11	9.65152	957.102	174.893	308.234	693.518	287.391	267.953	727.763	48.4049	202.866	743.659	63.0004	216.345	761.927	-11.678	202.363	730.37	-100.689	-251.944	673.635	267.537	-225.727	727.684	20.4922	-160.358	742.284	38.7295	-178.867	760.089	-36.7373	-145.385	730.396	-120.657
379	3.78	15.5554	1159.97	86.4949	88.1669	1157.08	130.539	-54.4964	1166.42	127.107	185.409	990.363	240.847	-148.14	980.465	248.152	9.64758	957.151	174.869	308.227	693.551	287.453	267.937	727.788	48.4057	202.853	743.694	62.9728	216.312	761.979	-11.739	202.346	730.441	-100.756	-251.943	673.644	267.56	-225.719	727.726	20.4615	-160.351	742.331	38.7303	-178.868	760.108	-36.7336	-145.383	730.456	-120.675
380	3.79	15.5595	1160.01	86.4594	88.1934	1157.09	130.53	-54.4681	1166.47	127.074	185.432	990.373	240.868	-148.118	980.484	248.175	9.64634	957.169	174.826	308.243	693.541	287.443	267.957	727.793	48.4111	202.87	743.716	62.9738	216.311	762.008	-11.777	202.35	730.472	-100.802	-251.926	673.634	267.553	-225.707	727.74	20.4765	-160.329	742.368	38.6987	-178.863	760.151	-36.7714	-145.366	730.504	-120.711
381	3.8	15.6115	1159.98	86.4979	88.2336	1157.09	130.526	-54.4245	1166.48	127.042	185.466	990.361	240.876	-148.077	980.489	248.189	9.6677	957.146	174.785	308.26	693.5	287.376	267.984	727.773	48.4341	202.901	743.719	62.9832	216.369	761.973	-11.7133	202.394	730.439	-100.766	-251.9	673.671	267.611	-225.687	727.744	20.4712	-160.291	742.372	38.6714	-178.84	760.211	-36.8489	-145.343	730.494	-120.695
382	3.81	15.6852	1159.92	86.6098	88.2719	1157.05	130.585	-54.3649	1166.45	127.057	185.507	990.33	240.889	-148.022	980.475	248.238	9.72205	957.082	174.834	308.286	693.469	287.368	268.038	727.769	48.483	202.935	743.686	63.016	216.439	761.923	-11.5841	202.472	730.375	-100.638	-251.863	673.68	267.632	-225.641	727.719	20.4708	-160.262	742.358	38.6932	-178.816	760.278	-36.8748	-145.293	730.478	-120.687
383	3.82	15.7287	1159.85	86.7012	88.3062	1157	130.637	-54.3366	1166.41	127.072	185.533	990.289	240.906	-148.006	980.454	248.264	9.74361	957.017	174.865	308.315	693.405	287.321	268.064	727.751	48.536	202.935	743.63	63.0155	216.496	761.867	-11.5529	202.524	730.302	-100.548	-251.852	673.656	267.614	-225.632	727.68	20.5132	-160.26	742.318	38.7348	-178.825	760.275	-36.8401	-145.256	730.475	-120.707
384	3.83	15.7447	1159.76	86.7478	88.3219	1156.95	130.598	-54.3361	1166.36	127.076	185.524	990.24	240.901	-148.019	980.401	248.234	9.73762	956.926	174.927	308.317	693.326	287.268	268.05	727.716	48.5283	202.919	743.579	63.002	216.507	761.83	-11.5746	202.515	730.237	-100.508	-251.892	673.635	267.583	-225.642	727.612	20.5131	-160.284	742.272	38.7451	-178.848	760.188	-36.789	-145.305	730.368	-120.651
385	3.84	15.74	1159.71	86.7822	88.3217	1156.91	130.573	-54.3585	1166.31	127.094	185.492	990.206	240.894	-148.053	980.376	248.23	9.71333	956.864	174.933	308.292	693.309	287.279	268.03	727.684	48.5085	202.904	743.554	63.0037	216.503	761.825	-11.5436	202.486	730.173	-100.443	-251.929	673.612	267.563	-225.672	727.574	20.4973	-160.322	742.247	38.7292	-178.86	760.094	-36.75	-145.344	730.321	-120.637
386	3.85	15.703	1159.74	86.7301	88.2982	1156.93	130.601	-54.3907	1166.32	127.087	185.457	990.222	240.887	-148.096	980.392	248.229	9.67141	956.849	174.923	308.267	693.361	287.344	267.992	727.692	48.4914	202.873	743.581	62.9982	216.458	761.871	-11.5301	202.432	730.185	-100.451	-251.964	673.607	267.563	-225.709	727.58	20.5115	-160.363	742.24	38.7537	-178.871	760.059	-36.6968	-145.37	730.316	-120.582
387	3.86	15.6807	1159.82	86.5846	88.2725	1156.97	130.54	-54.3971	1166.37	127.051	185.434	990.267	240.86	-148.123	980.42	248.191	9.63873	956.885	174.834	308.241	693.41	287.351	267.947	727.74	48.4341	202.853	743.631	62.9783	216.393	761.918	-11.6104	202.371	730.268	-100.591	-251.978	673.616	267.546	-225.738	727.634	20.4907	-160.367	742.268	38.7383	-178.876	760.06	-36.7071	-145.384	730.397	-120.64
388	3.87	15.7176	1159.88	86.4705	88.2985	1157	130.487	-54.3406	1166.44	126.969	185.425	990.31	240.823	-148.118	980.448	248.168	9.65774	956.933	174.724	308.221	693.452	287.365	267.958	727.788	48.3943	202.862	743.684	62.9406	216.388	761.936	-11.66	202.374	730.378	-100.729	-251.963	673.661	267.545	-225.72	727.689	20.4372	-160.356	742.305	38.7072	-178.867	760.128	-36.8025	-145.373	730.507	-120.78
389	3.88	15.7699	1159.95	86.3648	88.343	1157.03	130.488	-54.2784	1166.49	126.899	185.437	990.344	240.84	-148.096	980.462	248.181	9.68016	956.991	174.668	308.192	693.48	287.427	267.98	727.816	48.3903	202.871	743.71	62.9643	216.429	761.943	-11.6443	202.404	730.458	-100.769	-251.959	673.693	267.574	-225.701	727.733	20.4384	-160.319	742.347	38.6919	-178.863	760.257	-36.9425	-145.341	730.508	-120.745
390	3.89	15.8142	1159.98	86.3293	88.3676	1157.03	130.485	-54.2275	1166.51	126.86	185.461	990.349	240.894	-148.087	980.468	248.197	9.69716	957.008	174.64	308.176	693.467	287.454	267.998	727.805	48.4307	202.904	743.728	63.0028	216.442	761.956	-11.6445	202.417	730.494	-100.793	-251.945	673.699	267.631	-225.685	727.744	20.4711	-160.288	742.37	38.7049	-178.866	760.299	-36.9827	-145.306	730.601	-120.868
391	3.9	15.8612	1159.92	86.372	88.4082	1157	130.495	-54.1979	1166.49	126.842	185.493	990.323	240.907	-148.059	980.446	248.186	9.71314	956.976	174.652	308.201	693.423	287.417	268.022	727.773	48.4538	202.937	743.716	63.0048	216.457	761.935	-11.6497	202.449	730.475	-100.761	-251.922	673.672	267.626	-225.663	727.731	20.4698	-160.275	742.38	38.66	-178.854	760.319	-37.0082	-145.289	730.576	-120.844
392	3.91	15.9092	1159.83	86.5123	88.4509	1156.95	130.564	-54.1834	1166.43	126.875	185.519	990.295	240.922	-148.021	980.417	248.188	9.74303	956.907	174.729	308.232	693.37	287.382	268.054	727.736	48.5067	202.948	743.675	63.0208	216.522	761.882	-11.5682	202.491	730.388	-100.68	-251.915	673.639	267.589	-225.649	727.698	20.4757	-160.283	742.353	38.6788	-178.834	760.283	-36.9333	-145.287	730.458	-120.694
393	3.92	15.9152	1159.74	86.6571	88.4478	1156.9	130.603	-54.2046	1166.37	126.918	185.532	990.259	240.92	-148.008	980.391	248.176	9.72763	956.84	174.834	308.251	693.337	287.321	268.064	727.698	48.5722	202.933	743.624	63.0416	216.539	761.848	-11.5258	202.493	730.299	-100.569	-251.923	673.6	267.552	-225.664	727.659	20.5026	-160.301	742.304	38.743	-178.865	760.167	-36.7493	-145.308	730.382	-120.604
394	3.93	15.8897	1159.69	86.6867	88.4227	1156.87	130.593	-54.2379	1166.32	126.919	185.511	990.227	240.906	-148.027	980.359	248.155	9.70461	956.782	174.859	308.254	693.33	287.311	268.036	727.679	48.5587	202.894	743.589	63.0242	216.489	761.842	-11.5657	202.447	730.267	-100.579	-251.943	673.56	267.515	-225.689	727.616	20.5044	-160.325	742.249	38.7709	-178.892	760.067	-36.6653	-145.335	730.334	-120.592
395	3.94	15.8779	1159.68	86.6693	88.4105	1156.89	130.596	-54.2541	1166.3	126.879	185.493	990.208	240.906	-148.039	980.349	248.157	9.68847	956.767	174.807	308.227	693.311	287.344	268.007	727.69	48.5125	202.881	743.595	62.9961	216.455	761.861	-11.5861	202.426	730.268	-100.615	-251.942	673.539	267.51	-225.698	727.595	20.4995	-160.343	742.229	38.7533	-178.874	760.071	-36.7161	-145.349	730.318	-120.603
396	3.95	15.8642	1159.71	86.624	88.4037	1156.93	130.592	-54.2701	1166.31	126.892	185.485	990.214	240.918	-148.051	980.353	248.177	9.7011	956.793	174.783	308.185	693.309	287.359	267.997	727.719	48.512	202.883	743.64	62.993	216.422	761.884	-11.61	202.425	730.314	-100.598	-251.932	673.547	267.536	-225.706	727.62	20.5284	-160.344	742.257	38.7516	-178.867	760.135	-36.7878	-145.366	730.343	-120.577
397	3.96	15.8591	1159.76	86.5713	88.3837	1156.96	130.556	-54.2715	1166.32	126.901	185.484	990.248	240.937	-148.054	980.38	248.159	9.72266	956.83	174.748	308.168	693.33	287.365	267.997	727.757	48.4754	202.893	743.681	63.0026	216.413	761.887	-11.635	202.426	730.371	-100.653	-251.91	673.591	267.59	-225.694	727.66	20.5315	-160.329	742.287	38.7381	-178.857	760.192	-36.8262	-145.364	730.38	-120.6
398	3.97	15.8724	1159.79	86.5226	88.4009	1156.99	130.53	-54.2487	1166.35	126.841	185.497	990.284	240.917	-148.035	980.41	248.118	9.7752	956.863	174.7	308.176	693.366	287.387	268.008	727.792	48.4421	202.922	743.71	62.9933	216.436	761.885	-11.5938	202.458	730.407	-100.707	-251.889	673.645	267.598	-225.654	727.703	20.4696	-160.293	742.33	38.6797	-178.824	760.298	-36.9658	-145.323	730.393	-120.631
399	3.98	15.8709	1159.81	86.4817	88.416	1157.01	130.522	-54.2329	1166.39	126.786	185.516	990.3	240.896	-148.022	980.426	248.115	9.79379	956.888	174.621	308.181	693.373	287.366	268.019	727.819	48.4033	202.942	743.724	62.9924	216.488	761.888	-11.5531	202.492	730.395	-100.692	-251.873	673.666	267.575	-225.641	727.727	20.4384	-160.28	742.359	38.6364	-178.813	760.345	-37.0273	-145.302	730.422	-120.648
400	3.99	15.8347	1159.8	86.4878	88.4059	1157	130.527	-54.2465	1166.39	126.798	185.528	990.291	240.906	-148.016	980.418	248.14	9.76069	956.846	174.652	308.182	693.352	287.348	268.026	727.793	48.4186	202.925	743.699	62.9877	216.482	761.908	-11.5838	202.448	730.359	-100.652	-251.873	673.633	267.557	-225.654	727.734	20.4259	-160.282	742.354	38.6395	-178.857	760.299	-36.953	-145.298	730.46	-120.71
401	4	15.7944	1159.76	86.5476	88.3688	1156.97	130.561	-54.2718	1166.37	126.838	185.523	990.262	240.936	-148.019	980.388	248.17	9.73036	956.795	174.675	308.185	693.335	287.389	268	727.741	48.4513	202.896	743.667	62.9759	216.449	761.918	-11.6044	202.412	730.324	-100.622	-251.876	673.597	267.554	-225.671	727.705	20.4507	-160.288	742.329	38.6487	-178.889	760.195	-36.8779	-145.292	730.532	-120.837
402	4.01	15.7537	1159.75	86.5974	88.3239	1156.94	130.573	-54.3169	1166.35	126.903	185.526	990.229	240.947	-148.03	980.353	248.165	9.71825	956.747	174.742	308.201	693.304	287.381	267.979	727.702	48.4969	202.885	743.637	62.9971	216.445	761.925	-11.5882	202.398	730.308	-100.62	-251.888	673.566	267.546	-225.69	727.687	20.4742	-160.319	742.31	38.679	-178.901	760.135	-36.8337	-145.312	730.565	-120.866
403	4.02	15.7357	1159.74	86.6036	88.3052	1156.96	130.559	-54.3615	1166.32	126.93	185.537	990.215	240.939	-148.019	980.344	248.152	9.72039	956.712	174.825	308.212	693.282	287.356	267.982	727.692	48.5201	202.886	743.628	63.0211	216.436	761.92	-11.5792	202.39	730.316	-100.603	-251.894	673.543	267.52	-225.714	727.669	20.4917	-160.341	742.275	38.7104	-178.903	760.083	-36.7004	-145.346	730.515	-120.808
404	4.03	15.7468	1159.75	86.6215	88.3118	1156.97	130.53	-54.3561	1166.31	126.96	185.558	990.214	240.923	-147.986	980.346	248.139	9.74727	956.728	174.797	308.222	693.267	287.327	268.006	727.702	48.5127	202.898	743.643	62.9977	216.456	761.907	-11.5912	202.424	730.315	-100.596	-251.889	673.555	267.544	-225.696	727.655	20.4762	-160.342	742.253	38.7403	-178.872	760.08	-36.6885	-145.35	730.402	-120.692
405	4.04	15.7858	1159.79	86.5886	88.3489	1156.99	130.539	-54.3169	1166.31	126.958	185.576	990.209	240.911	-147.973	980.348	248.15	9.79152	956.784	174.722	308.21	693.245	287.353	268.051	727.739	48.5134	202.933	743.659	62.9842	216.479	761.895	-11.5759	202.472	730.35	-100.635	-251.884	673.577	267.573	-225.671	727.661	20.4764	-160.31	742.278	38.7265	-178.834	760.183	-36.8285	-145.333	730.373	-120.649
406	4.05	15.8019	1159.83	86.5429	88.3687	1157.01	130.55	-54.3071	1166.33	126.965	185.575	990.209	240.935	-147.971	980.364	248.214	9.82535	956.834	174.715	308.178	693.229	287.387	268.063	727.761	48.5204	202.953	743.674	62.9862	216.503	761.892	-11.5754	202.509	730.409	-100.67	-251.877	673.59	267.622	-225.663	727.665	20.5115	-160.299	742.311	38.6976	-178.819	760.292	-36.9647	-145.321	730.391	-120.646
407	4.06	15.7961	1159.85	86.5648	88.3664	1157.01	130.575	-54.3141	1166.34	126.998	185.57	990.228	240.965	-147.967	980.372	248.228	9.83142	956.852	174.712	308.173	693.224	287.388	268.048	727.778	48.5016	202.953	743.682	62.9961	216.511	761.889	-11.5471	202.507	730.405	-100.642	-251.883	673.599	267.622	-225.657	727.663	20.522	-160.297	742.318	38.7052	-178.812	760.3	-36.9372	-145.309	730.393	-120.604
408	4.07	15.7672	1159.86	86.5234	88.358	1157.03	130.582	-54.3146	1166.36	126.977	185.567	990.248	240.944	-147.981	980.371	248.227	9.82274	956.851	174.706	308.172	693.261	287.386	268.036	727.789	48.4894	202.955	743.701	62.9936	216.504	761.901	-11.5489	202.487	730.407	-100.66	-251.886	673.621	267.621	-225.653	727.676	20.4944	-160.288	742.324	38.702	-178.814	760.307	-36.9079	-145.293	730.395	-120.598
409	4.08	15.7264	1159.86	86.5128	88.3296	1157.03	130.598	-54.3411	1166.36	126.999	185.562	990.273	240.944	-147.978	980.38	248.244	9.79519	956.831	174.757	308.179	693.326	287.387	268.015	727.779	48.477	202.924	743.692	62.9933	216.479	761.9	-11.5914	202.442	730.404	-100.678	-251.894	673.623	267.599	-225.649	727.701	20.4542	-160.29	742.336	38.7168	-178.835	760.245	-36.8344	-145.294	730.443	-120.662
410	4.09	15.6826	1159.81	86.5887	88.2819	1157.03	130.599	-54.3753	1166.35	127.023	185.538	990.28	240.968	-147.993	980.368	248.238	9.75043	956.771	174.832	308.186	693.357	287.39	267.989	727.75	48.489	202.883	743.661	63.0185	216.437	761.911	-11.6299	202.398	730.355	-100.633	-251.898	673.596	267.561	-225.678	727.704	20.4381	-160.318	742.325	38.7332	-178.883	760.101	-36.684	-145.316	730.548	-120.841
411	4.1	15.6458	1159.8	86.6118	88.2328	1157.01	130.579	-54.4072	1166.35	127.042	185.518	990.261	240.979	-148.011	980.335	248.225	9.7106	956.745	174.819	308.194	693.356	287.402	267.971	727.714	48.4927	202.866	743.634	63.0356	216.405	761.923	-11.6262	202.365	730.322	-100.625	-251.886	673.543	267.534	-225.704	727.687	20.4525	-160.341	742.305	38.7316	-178.916	760.047	-36.6663	-145.332	730.534	-120.831
412	4.11	15.6419	1159.81	86.6281	88.2386	1157.01	130.613	-54.4164	1166.35	127.024	185.519	990.244	240.994	-148.012	980.311	248.24	9.7051	956.727	174.802	308.213	693.342	287.411	267.976	727.687	48.4989	202.885	743.624	63.0446	216.408	761.906	-11.6243	202.37	730.327	-100.629	-251.883	673.502	267.52	-225.698	727.666	20.4795	-160.335	742.294	38.7233	-178.917	760.09	-36.7587	-145.338	730.448	-120.675
413	4.12	15.6848	1159.82	86.6556	88.2508	1157.01	130.639	-54.3958	1166.34	127.06	185.523	990.243	241.008	-148.012	980.301	248.253	9.72795	956.732	174.791	308.243	693.313	287.373	268.006	727.694	48.527	202.891	743.639	63.0287	216.432	761.883	-11.5884	202.399	730.305	-100.567	-251.865	673.526	267.573	-225.697	727.662	20.4885	-160.323	742.303	38.7281	-178.888	760.147	-36.7934	-145.335	730.393	-120.599
414	4.13	15.7292	1159.84	86.6767	88.2754	1157.01	130.642	-54.3783	1166.35	127.038	185.517	990.243	240.981	-148.015	980.308	248.201	9.7422	956.744	174.753	308.25	693.31	287.355	268.04	727.727	48.5155	202.921	743.643	63.01	216.468	761.864	-11.5471	202.445	730.3	-100.555	-251.848	673.558	267.61	-225.68	727.657	20.4689	-160.322	742.288	38.7212	-178.876	760.236	-36.9182	-145.332	730.368	-120.59
415	4.14	15.762	1159.87	86.6661	88.3108	1157.03	130.653	-54.3629	1166.36	127.018	185.503	990.254	240.935	-148.007	980.321	248.162	9.77026	956.763	174.721	308.246	693.325	287.333	268.056	727.766	48.4754	202.949	743.673	62.9935	216.516	761.836	-11.5141	202.488	730.312	-100.552	-251.856	673.558	267.592	-225.672	727.656	20.4957	-160.308	742.288	38.6962	-178.856	760.334	-37.0525	-145.319	730.357	-120.588
416	4.15	15.7805	1159.88	86.6842	88.3283	1157.04	130.681	-54.3648	1166.37	127.024	185.486	990.267	240.928	-148.019	980.315	248.15	9.78312	956.764	174.709	308.23	693.337	287.329	268.049	727.774	48.4849	202.947	743.675	62.9855	216.526	761.847	-11.5296	202.49	730.341	-100.589	-251.867	673.538	267.557	-225.679	727.655	20.5094	-160.304	742.294	38.6816	-178.865	760.362	-37.0803	-145.317	730.363	-120.57
417	4.16	15.7484	1159.91	86.6562	88.2981	1157.06	130.674	-54.3736	1166.38	127.043	185.466	990.269	240.954	-148.053	980.299	248.168	9.74892	956.739	174.748	308.2	693.356	287.37	268.021	727.758	48.4717	202.926	743.677	63.0075	216.473	761.896	-11.6004	202.448	730.361	-100.614	-251.883	673.508	267.581	-225.691	727.66	20.5123	-160.317	742.294	38.7032	-178.886	760.291	-36.959	-145.329	730.389	-120.596
418	4.17	15.7012	1159.94	86.6002	88.2556	1157.08	130.653	-54.382	1166.42	127.028	185.446	990.283	240.957	-148.079	980.298	248.167	9.72344	956.729	174.761	308.171	693.383	287.419	267.996	727.748	48.4788	202.906	743.685	63.0279	216.446	761.929	-11.6116	202.409	730.386	-100.651	-251.892	673.47	267.574	-225.713	727.677	20.5036	-160.333	742.301	38.717	-178.87	760.19	-36.8047	-145.34	730.432	-120.634
419	4.18	15.6732	1159.97	86.5578	88.2373	1157.09	130.648	-54.3887	1166.45	126.98	185.445	990.315	240.941	-148.078	980.295	248.134	9.69817	956.762	174.715	308.181	693.425	287.439	267.999	727.753	48.4665	202.893	743.704	63.0197	216.406	761.96	-11.6733	202.366	730.438	-100.716	-251.861	673.459	267.549	-225.714	727.731	20.4594	-160.325	742.326	38.7253	-178.89	760.15	-36.7431	-145.328	730.494	-120.7
420	4.19	15.6745	1159.98	86.511	88.2473	1157.08	130.649	-54.388	1166.46	126.961	185.456	990.329	240.936	-148.06	980.288	248.117	9.69091	956.781	174.687	308.205	693.442	287.423	267.996	727.743	48.4625	202.889	743.72	63.0064	216.4	761.97	-11.7018	202.349	730.464	-100.74	-251.822	673.464	267.545	-225.7	727.756	20.4615	-160.316	742.349	38.7078	-178.893	760.124	-36.6677	-145.309	730.557	-120.776
421	4.2	15.6988	1159.95	86.5115	88.273	1157.08	130.657	-54.3651	1166.43	126.938	185.483	990.31	240.939	-148.043	980.27	248.12	9.71537	956.768	174.684	308.222	693.424	287.441	268.03	727.727	48.5097	202.922	743.704	63.0221	216.46	761.949	-11.6343	202.39	730.447	-100.741	-251.8	673.441	267.555	-225.674	727.744	20.4717	-160.283	742.357	38.6903	-178.888	760.145	-36.7037	-145.295	730.525	-120.754
422	4.21	15.7469	1159.9	86.5608	88.2997	1157.05	130.679	-54.3423	1166.39	126.916	185.518	990.27	240.963	-148.017	980.241	248.131	9.75331	956.759	174.684	308.234	693.368	287.432	268.083	727.72	48.5686	202.953	743.684	63.0134	216.517	761.914	-11.5677	202.45	730.417	-100.715	-251.795	673.435	267.581	-225.644	727.695	20.4873	-160.261	742.338	38.6858	-178.844	760.227	-36.8487	-145.267	730.561	-120.838
423	4.22	15.7803	1159.83	86.6333	88.3226	1157.02	130.716	-54.3564	1166.34	126.953	185.535	990.225	240.98	-148.006	980.217	248.141	9.77492	956.741	174.703	308.254	693.29	287.397	268.113	727.715	48.591	202.968	743.643	63.02	216.542	761.849	-11.5108	202.49	730.36	-100.626	-251.816	673.434	267.591	-225.627	727.638	20.5234	-160.263	742.296	38.7179	-178.824	760.244	-36.8586	-145.27	730.489	-120.802
424	4.23	15.7649	1159.78	86.6977	88.3066	1157	130.7	-54.3823	1166.27	126.989	185.51	990.214	240.979	-148.029	980.214	248.133	9.76152	956.703	174.758	308.252	693.267	287.345	268.098	727.708	48.5934	202.955	743.61	63.0346	216.549	761.815	-11.4784	202.493	730.308	-100.556	-251.844	673.431	267.57	-225.635	727.611	20.5463	-160.291	742.26	38.7509	-178.846	760.237	-36.8224	-145.299	730.36	-120.636
425	4.24	15.7229	1159.75	86.7439	88.2725	1156.97	130.666	-54.4191	1166.24	126.978	185.47	990.231	240.944	-148.048	980.227	248.132	9.738	956.691	174.811	308.235	693.291	287.316	268.046	727.732	48.5216	202.93	743.595	63.0317	216.534	761.804	-11.4696	202.478	730.262	-100.483	-251.863	673.428	267.51	-225.666	727.603	20.5305	-160.317	742.243	38.7629	-178.864	760.208	-36.8174	-145.343	730.336	-120.584
426	4.25	15.6636	1159.76	86.6658	88.2182	1156.96	130.607	-54.4692	1166.23	126.972	185.437	990.243	240.906	-148.082	980.247	248.124	9.69395	956.694	174.802	308.193	693.322	287.343	268.001	727.745	48.5037	202.887	743.608	63.0295	216.507	761.841	-11.4999	202.437	730.281	-100.513	-251.876	673.441	267.498	-225.692	727.609	20.5021	-160.343	742.249	38.7513	-178.892	760.158	-36.7583	-145.358	730.345	-120.587
427	4.26	15.5964	1159.8	86.5212	88.1518	1156.98	130.51	-54.5009	1166.25	126.972	185.401	990.251	240.913	-148.117	980.265	248.131	9.66465	956.705	174.786	308.138	693.347	287.393	267.965	727.748	48.4758	202.863	743.637	63.0173	216.44	761.915	-11.6065	202.38	730.349	-100.656	-251.892	673.456	267.526	-225.726	727.632	20.4901	-160.364	742.257	38.7373	-178.918	760.143	-36.7533	-145.379	730.381	-120.634
428	4.27	15.5448	1159.82	86.4349	88.1225	1157.02	130.426	-54.5256	1166.3	126.92	185.384	990.274	240.919	-148.134	980.283	248.114	9.64888	956.736	174.748	308.108	693.383	287.477	267.944	727.76	48.4329	202.859	743.671	62.9882	216.353	761.98	-11.722	202.333	730.416	-100.759	-251.902	673.476	267.545	-225.748	727.684	20.4877	-160.348	742.279	38.7105	-178.924	760.159	-36.8228	-145.398	730.449	-120.674
429	4.28	15.5202	1159.84	86.3868	88.1178	1157.05	130.414	-54.5224	1166.33	126.893	185.397	990.297	240.905	-148.121	980.3	248.116	9.64219	956.751	174.775	308.11	693.414	287.493	267.953	727.778	48.4136	202.854	743.7	62.9687	216.32	761.991	-11.7239	202.32	730.454	-100.782	-251.885	673.483	267.53	-225.745	727.722	20.4748	-160.341	742.316	38.708	-178.925	760.199	-36.9012	-145.378	730.51	-120.709
430	4.29	15.5245	1159.82	86.4157	88.1071	1157.04	130.429	-54.511	1166.33	126.88	185.419	990.313	240.892	-148.094	980.307	248.119	9.6579	956.752	174.796	308.13	693.424	287.456	267.968	727.781	48.414	202.86	743.702	62.9875	216.335	761.979	-11.6667	202.348	730.448	-100.742	-251.854	673.505	267.552	-225.721	727.74	20.4588	-160.331	742.352	38.6953	-178.898	760.268	-36.9882	-145.353	730.582	-120.841
431	4.3	15.5483	1159.78	86.4558	88.1185	1157	130.454	-54.4955	1166.29	126.879	185.441	990.297	240.907	-148.063	980.304	248.134	9.67278	956.761	174.79	308.162	693.394	287.417	267.994	727.767	48.4431	202.875	743.689	62.9828	216.389	761.932	-11.6126	202.391	730.409	-100.7	-251.836	673.525	267.578	-225.686	727.715	20.4346	-160.306	742.351	38.6903	-178.873	760.315	-37.0214	-145.322	730.547	-120.788
432	4.31	15.587	1159.72	86.4953	88.16	1156.97	130.462	-54.4918	1166.27	126.874	185.467	990.273	240.906	-148.048	980.28	248.14	9.69946	956.747	174.804	308.197	693.346	287.382	268.053	727.751	48.4963	202.91	743.671	62.9999	216.492	761.894	-11.5348	202.452	730.351	-100.609	-251.844	673.535	267.584	-225.662	727.677	20.4481	-160.29	742.331	38.6889	-178.873	760.309	-37.0005	-145.303	730.436	-120.651
433	4.32	15.6214	1159.67	86.5449	88.1849	1156.94	130.477	-54.5009	1166.21	126.862	185.465	990.237	240.896	-148.047	980.245	248.149	9.71771	956.726	174.802	308.188	693.294	287.34	268.066	727.723	48.5292	202.949	743.633	63.013	216.55	761.894	-11.5235	202.487	730.318	-100.566	-251.876	673.497	267.56	-225.672	727.626	20.4956	-160.307	742.292	38.7107	-178.87	760.242	-36.9211	-145.293	730.382	-120.606
434	4.33	15.6152	1159.63	86.5588	88.1867	1156.9	130.455	-54.5129	1166.16	126.88	185.446	990.214	240.891	-148.06	980.22	248.126	9.71228	956.704	174.815	308.171	693.28	287.335	268.06	727.697	48.5422	202.946	743.603	63.012	216.567	761.873	-11.5448	202.5	730.271	-100.532	-251.907	673.459	267.546	-225.679	727.586	20.4872	-160.326	742.262	38.7238	-178.871	760.148	-36.7925	-145.303	730.353	-120.603
435	4.34	15.5819	1159.63	86.5199	88.1745	1156.89	130.455	-54.5475	1166.14	126.915	185.429	990.226	240.887	-148.08	980.232	248.117	9.70382	956.702	174.841	308.18	693.318	287.38	268.046	727.704	48.5272	202.933	743.598	63.0309	216.533	761.877	-11.5546	202.479	730.282	-100.556	-251.925	673.44	267.54	-225.685	727.577	20.5064	-160.353	742.251	38.7362	-178.878	760.094	-36.676	-145.315	730.334	-120.579
436	4.35	15.5353	1159.65	86.4795	88.1343	1156.91	130.452	-54.5778	1166.14	126.944	185.41	990.256	240.887	-148.104	980.24	248.101	9.67303	956.741	174.867	308.187	693.357	287.38	268.01	727.723	48.4966	202.913	743.629	63.0204	216.497	761.9	-11.5666	202.438	730.331	-100.598	-251.927	673.43	267.515	-225.711	727.615	20.5122	-160.381	742.265	38.7517	-178.905	760.085	-36.6581	-145.339	730.355	-120.57
437	4.36	15.52	1159.72	86.4099	88.1146	1156.94	130.435	-54.5766	1166.17	126.917	185.4	990.277	240.885	-148.125	980.264	248.092	9.64541	956.79	174.797	308.169	693.368	287.384	267.976	727.751	48.4432	202.908	743.681	63.0365	216.442	761.932	-11.6123	202.392	730.409	-100.678	-251.925	673.437	267.51	-225.728	727.657	20.5089	-160.38	742.292	38.7522	-178.901	760.135	-36.6963	-145.357	730.405	-120.606
438	4.37	15.5434	1159.76	86.3512	88.1223	1156.97	130.42	-54.5298	1166.23	126.856	185.415	990.291	240.891	-148.11	980.285	248.085	9.65784	956.842	174.722	308.177	693.404	287.442	267.998	727.76	48.4397	202.924	743.694	63.0438	216.4	761.928	-11.6273	202.407	730.466	-100.76	-251.903	673.469	267.562	-225.713	727.691	20.4987	-160.345	742.327	38.7281	-178.872	760.208	-36.8178	-145.345	730.451	-120.654
439	4.38	15.5728	1159.75	86.318	88.1691	1156.98	130.419	-54.4823	1166.23	126.81	185.432	990.305	240.895	-148.086	980.283	248.085	9.69359	956.857	174.753	308.203	693.425	287.477	268.042	727.761	48.4901	202.948	743.692	63.0321	216.435	761.898	-11.6256	202.442	730.458	-100.756	-251.878	673.498	267.603	-225.685	727.715	20.4792	-160.303	742.352	38.6845	-178.828	760.281	-36.9126	-145.308	730.46	-120.668
440	4.39	15.5852	1159.73	86.3351	88.1869	1156.95	130.454	-54.4748	1166.22	126.79	185.443	990.306	240.888	-148.089	980.282	248.081	9.7038	956.857	174.761	308.21	693.41	287.419	268.061	727.749	48.5345	202.948	743.684	63.0421	216.468	761.883	-11.6109	202.467	730.446	-100.736	-251.868	673.513	267.614	-225.673	727.715	20.4694	-160.287	742.372	38.6506	-178.836	760.315	-36.9332	-145.296	730.46	-120.676
441	4.4	15.5881	1159.66	86.4315	88.1704	1156.94	130.44	-54.4934	1166.18	126.764	185.457	990.312	240.837	-148.086	980.268	248.057	9.70578	956.833	174.787	308.229	693.403	287.35	268.054	727.724	48.5408	202.933	743.66	63.0275	216.466	761.863	-11.5951	202.462	730.375	-100.669	-251.858	673.506	267.592	-225.664	727.691	20.4446	-160.283	742.364	38.6578	-178.857	760.286	-36.9532	-145.303	730.436	-120.678
442	4.41	15.5806	1159.58	86.5162	88.1599	1156.88	130.46	-54.5222	1166.12	126.771	185.453	990.304	240.828	-148.105	980.246	248.029	9.69504	956.786	174.899	308.246	693.404	287.333	268.034	727.7	48.5316	202.91	743.605	63.0244	216.487	761.828	-11.542	202.443	730.273	-100.558	-251.862	673.479	267.54	-225.672	727.664	20.4205	-160.316	742.303	38.6907	-178.888	760.194	-36.8553	-145.325	730.396	-120.663
443	4.42	15.5434	1159.55	86.5357	88.125	1156.85	130.473	-54.5713	1166.07	126.829	185.428	990.3	240.865	-148.146	980.233	248.031	9.64496	956.755	174.953	308.235	693.416	287.371	268.007	727.681	48.5226	202.887	743.573	63.0363	216.476	761.832	-11.5252	202.41	730.228	-100.511	-251.887	673.459	267.552	-225.695	727.607	20.4838	-160.349	742.254	38.7485	-178.927	760.095	-36.6962	-145.349	730.36	-120.631
444	4.43	15.5372	1159.54	86.5058	88.1037	1156.86	130.424	-54.585	1166.03	126.855	185.4	990.317	240.875	-148.175	980.24	248.033	9.63378	956.763	174.977	308.226	693.432	287.382	267.978	727.681	48.4829	202.867	743.582	63.0021	216.437	761.863	-11.5806	202.389	730.254	-100.574	-251.908	673.438	267.508	-225.727	727.587	20.5333	-160.369	742.229	38.7623	-178.921	760.074	-36.7081	-145.365	730.339	-120.612
445	4.44	15.5509	1159.58	86.4387	88.092	1156.89	130.381	-54.5703	1166.04	126.814	185.385	990.35	240.839	-148.188	980.26	248.021	9.63888	956.813	174.956	308.207	693.46	287.384	267.977	727.715	48.4298	202.863	743.629	62.9777	216.413	761.883	-11.6376	202.388	730.299	-100.651	-251.92	673.441	267.494	-225.745	727.605	20.5158	-160.372	742.237	38.7365	-178.909	760.13	-36.7999	-145.369	730.345	-120.613
446	4.45	15.5663	1159.61	86.3951	88.0964	1156.93	130.381	-54.5521	1166.07	126.778	185.399	990.405	240.833	-148.175	980.312	248.022	9.63533	956.898	174.927	308.213	693.508	287.391	267.982	727.774	48.4247	202.868	743.688	62.9522	216.415	761.902	-11.6144	202.4	730.348	-100.66	-251.905	673.49	267.515	-225.738	727.647	20.4888	-160.352	742.288	38.7089	-178.894	760.232	-36.8982	-145.356	730.359	-120.601
447	4.46	15.5918	1159.65	86.3678	88.1263	1156.97	130.369	-54.5222	1166.13	126.746	185.422	990.45	240.853	-148.153	980.365	248.035	9.67599	956.975	174.932	308.232	693.557	287.419	268.002	727.82	48.415	202.906	743.729	62.9535	216.427	761.908	-11.6243	202.438	730.396	-100.651	-251.892	673.553	267.547	-225.703	727.681	20.4622	-160.312	742.34	38.6821	-178.882	760.299	-36.9569	-145.339	730.397	-120.593
448	4.47	15.6136	1159.68	86.3005	88.166	1156.97	130.347	-54.4945	1166.16	126.684	185.459	990.488	240.842	-148.125	980.39	248.021	9.72301	957.044	174.883	308.263	693.578	287.388	268.043	727.827	48.4081	202.955	743.757	62.9419	216.429	761.918	-11.6486	202.474	730.433	-100.712	-251.891	673.586	267.555	-225.661	727.705	20.4393	-160.273	742.375	38.6153	-178.855	760.379	-37.0703	-145.294	730.473	-120.728
449	4.48	15.6275	1159.65	86.3132	88.1838	1156.95	130.349	-54.4763	1166.16	126.664	185.479	990.51	240.869	-148.098	980.396	248.01	9.74878	957.062	174.913	308.277	693.588	287.375	268.07	727.797	48.4724	202.97	743.759	62.9342	216.444	761.953	-11.6691	202.485	730.432	-100.745	-251.89	673.614	267.58	-225.636	727.708	20.4385	-160.256	742.402	38.6017	-178.832	760.361	-37.0695	-145.269	730.574	-120.901
450	4.49	15.6162	1159.58	86.3864	88.1656	1156.91	130.372	-54.4876	1166.14	126.684	185.491	990.51	240.922	-148.098	980.392	248.034	9.73109	957.06	175.038	308.293	693.618	287.408	268.072	727.756	48.5089	202.965	743.733	62.9778	216.469	761.973	-11.6346	202.472	730.399	-100.675	-251.903	673.608	267.588	-225.648	727.693	20.4652	-160.269	742.389	38.627	-178.833	760.22	-36.8501	-145.255	730.575	-120.878
451	4.5	15.5745	1159.51	86.4328	88.1205	1156.88	130.38	-54.5277	1166.09	126.71	185.484	990.524	240.935	-148.113	980.39	248.07	9.70382	957.056	175.08	308.322	693.64	287.414	268.057	727.723	48.5021	202.95	743.703	62.9905	216.475	761.96	-11.6038	202.441	730.364	-100.635	-251.918	673.594	267.561	-225.674	727.677	20.4661	-160.296	742.33	38.6783	-178.861	760.1	-36.7185	-145.256	730.563	-120.875
452	4.51	15.5226	1159.47	86.4452	88.0771	1156.87	130.358	-54.5616	1166.04	126.752	185.476	990.539	240.934	-148.134	980.396	248.069	9.68532	957.064	175.106	308.348	693.666	287.4	268.024	727.711	48.4834	202.915	743.677	62.9826	216.44	761.946	-11.6536	202.417	730.337	-100.666	-251.956	673.59	267.508	-225.697	727.669	20.4543	-160.316	742.305	38.7011	-178.866	760.048	-36.6857	-145.287	730.515	-120.819
453	4.52	15.5004	1159.44	86.4743	88.0615	1156.85	130.377	-54.5954	1165.98	126.825	185.469	990.543	240.952	-148.138	980.412	248.112	9.66621	957.083	175.207	308.362	693.667	287.364	268.005	727.714	48.4908	202.893	743.663	62.9868	216.434	761.92	-11.6409	202.413	730.291	-100.581	-251.989	673.623	267.53	-225.716	727.644	20.4769	-160.353	742.282	38.7378	-178.873	760.034	-36.6586	-145.32	730.406	-120.658
454	4.53	15.496	1159.42	86.4955	88.0687	1156.83	130.382	-54.6101	1165.94	126.824	185.464	990.548	240.968	-148.142	980.424	248.146	9.66964	957.104	175.244	308.384	693.668	287.372	268.012	727.72	48.4824	202.885	743.663	62.9571	216.45	761.873	-11.6001	202.436	730.273	-100.533	-252.012	673.651	267.541	-225.724	727.613	20.5113	-160.374	742.277	38.7516	-178.876	760.127	-36.7533	-145.344	730.363	-120.614
455	4.54	15.5152	1159.42	86.4706	88.0845	1156.83	130.366	-54.6074	1165.93	126.788	185.475	990.559	240.985	-148.139	980.44	248.177	9.70151	957.169	175.202	308.407	693.674	287.366	268.021	727.735	48.4425	202.91	743.674	62.9401	216.465	761.85	-11.5714	202.461	730.298	-100.574	-252.027	673.695	267.551	-225.7	727.6	20.5286	-160.357	742.287	38.7206	-178.866	760.271	-36.9563	-145.345	730.351	-120.638
456	4.55	15.5137	1159.44	86.4418	88.0861	1156.83	130.368	-54.6033	1165.95	126.764	185.488	990.588	240.995	-148.134	980.482	248.231	9.70872	957.263	175.188	308.434	693.697	287.377	268.045	727.752	48.4218	202.94	743.702	62.9341	216.468	761.824	-11.5511	202.451	730.318	-100.591	-252.025	673.765	267.598	-225.681	727.617	20.5236	-160.334	742.318	38.6938	-178.859	760.387	-37.1129	-145.338	730.369	-120.647
457	4.56	15.4912	1159.46	86.3992	88.0536	1156.86	130.357	-54.6101	1165.96	126.73	185.497	990.637	241.009	-148.127	980.539	248.245	9.70121	957.336	175.185	308.455	693.734	287.369	268.039	727.779	48.4147	202.937	743.732	62.9596	216.449	761.834	-11.5776	202.422	730.364	-100.641	-252.04	673.823	267.618	-225.687	727.655	20.5018	-160.329	742.367	38.6646	-178.86	760.393	-37.1143	-145.334	730.434	-120.681
458	4.57	15.4558	1159.46	86.3552	88.0198	1156.87	130.324	-54.6229	1165.96	126.712	185.503	990.684	241.014	-148.127	980.564	248.22	9.70281	957.421	175.173	308.471	693.783	287.348	268.032	727.778	48.3735	202.925	743.737	62.9418	216.446	761.854	-11.5967	202.38	730.419	-100.761	-252.052	673.847	267.601	-225.689	727.675	20.4664	-160.323	742.378	38.6427	-178.868	760.354	-37.1007	-145.324	730.543	-120.837
459	4.58	15.4178	1159.43	86.3561	87.9987	1156.87	130.336	-54.6414	1165.93	126.761	185.518	990.715	241.021	-148.13	980.568	248.233	9.68999	957.444	175.205	308.493	693.822	287.362	268.031	727.746	48.4213	202.914	743.722	62.9424	216.435	761.874	-11.6195	202.359	730.408	-100.767	-252.06	673.828	267.568	-225.695	727.673	20.4393	-160.312	742.366	38.6493	-178.875	760.232	-36.9959	-145.307	730.561	-120.898
460	4.59	15.388	1159.37	86.4492	87.989	1156.85	130.39	-54.6709	1165.89	126.831	185.531	990.717	241.074	-148.127	980.563	248.278	9.66636	957.425	175.318	308.508	693.84	287.401	268.024	727.7	48.4692	202.905	743.718	62.9754	216.451	761.891	-11.6117	202.375	730.34	-100.664	-252.086	673.804	267.565	-225.712	727.656	20.4601	-160.336	742.344	38.6964	-178.885	760.098	-36.7972	-145.305	730.519	-120.838
461	4.6	15.3866	1159.35	86.5228	87.9891	1156.83	130.407	-54.6765	1165.85	126.847	185.554	990.733	241.108	-148.122	980.57	248.295	9.67465	957.431	175.371	308.511	693.854	287.386	268.019	727.686	48.4846	202.896	743.725	62.975	216.429	761.904	-11.639	202.382	730.315	-100.631	-252.104	673.824	267.582	-225.709	727.641	20.4736	-160.341	742.33	38.7066	-178.859	760.05	-36.7012	-145.311	730.435	-120.73
462	4.61	15.4194	1159.33	86.5469	88.0157	1156.83	130.449	-54.6642	1165.84	126.869	185.579	990.775	241.097	-148.119	980.601	248.301	9.71072	957.487	175.389	308.525	693.858	287.351	268.038	727.699	48.4985	202.916	743.734	62.9586	216.438	761.896	-11.63	202.415	730.315	-100.637	-252.114	673.845	267.565	-225.685	727.632	20.4848	-160.334	742.331	38.6873	-178.814	760.065	-36.6833	-145.289	730.404	-120.685
463	4.62	15.4685	1159.35	86.5727	88.0472	1156.86	130.502	-54.641	1165.87	126.909	185.596	990.825	241.094	-148.105	980.646	248.318	9.75545	957.583	175.387	308.563	693.88	287.327	268.063	727.754	48.469	202.949	743.739	62.9825	216.489	761.89	-11.565	202.455	730.317	-100.606	-252.121	673.902	267.563	-225.668	727.65	20.486	-160.325	742.346	38.6981	-178.784	760.151	-36.753	-145.264	730.389	-120.643
464	4.63	15.4981	1159.39	86.541	88.0738	1156.87	130.489	-54.6137	1165.9	126.898	185.605	990.862	241.078	-148.095	980.684	248.349	9.78101	957.701	175.346	308.568	693.892	287.291	268.077	727.795	48.4181	202.982	743.767	62.9858	216.513	761.893	-11.5622	202.481	730.353	-100.647	-252.133	673.958	267.556	-225.657	727.677	20.4675	-160.306	742.359	38.6776	-178.784	760.282	-36.9074	-145.262	730.404	-120.654
465	4.64	15.5137	1159.45	86.4658	88.102	1156.9	130.472	-54.5896	1165.93	126.81	185.602	990.903	241.078	-148.085	980.716	248.342	9.78527	957.8	175.273	308.553	693.925	287.292	268.096	727.806	48.3942	202.999	743.799	62.9403	216.478	761.894	-11.6322	202.486	730.401	-100.71	-252.131	674.013	267.58	-225.664	727.678	20.4502	-160.28	742.389	38.6217	-178.79	760.365	-37.037	-145.271	730.423	-120.699
466	4.65	15.514	1159.47	86.4723	88.099	1156.93	130.473	-54.5835	1165.94	126.848	185.597	990.929	241.1	-148.103	980.735	248.365	9.78461	957.867	175.28	308.56	693.973	287.322	268.086	727.812	48.3916	202.996	743.816	62.9069	216.461	761.911	-11.6274	202.478	730.426	-100.711	-252.137	674.029	267.614	-225.664	727.681	20.4565	-160.282	742.392	38.6393	-178.788	760.346	-37.0005	-145.278	730.408	-120.684
467	4.66	15.4881	1159.45	86.552	88.0767	1156.92	130.486	-54.5943	1165.94	126.926	185.588	990.956	241.072	-148.146	980.76	248.369	9.73952	957.869	175.338	308.573	694.053	287.36	268.058	727.799	48.3801	202.96	743.783	62.9178	216.428	761.935	-11.6358	202.435	730.385	-100.669	-252.17	674.033	267.586	-225.672	727.679	20.4441	-160.311	742.378	38.6882	-178.813	760.218	-36.8479	-145.296	730.395	-120.665
468	4.67	15.4669	1159.43	86.5781	88.0421	1156.9	130.477	-54.6044	1165.93	126.953	185.578	990.993	241.038	-148.157	980.779	248.317	9.68261	957.86	175.359	308.599	694.125	287.361	268.031	727.777	48.3523	202.913	743.759	62.9106	216.377	761.93	-11.6802	202.371	730.343	-100.667	-252.196	674.047	267.538	-225.684	727.672	20.4175	-160.336	742.346	38.6996	-178.843	760.132	-36.8225	-145.308	730.395	-120.68
469	4.68	15.4612	1159.43	86.5681	88.0415	1156.87	130.483	-54.6086	1165.92	126.966	185.562	991.019	241.02	-148.167	980.795	248.3	9.63435	957.864	175.336	308.632	694.168	287.356	268.015	727.762	48.3658	202.881	743.75	62.8839	216.358	761.924	-11.6948	202.335	730.323	-100.703	-252.207	674.048	267.515	-225.708	727.666	20.4311	-160.358	742.329	38.703	-178.857	760.11	-36.8663	-145.315	730.375	-120.679
470	4.69	15.4781	1159.43	86.5915	88.0657	1156.86	130.498	-54.5899	1165.93	126.977	185.552	991.037	241.031	-148.177	980.814	248.329	9.61829	957.864	175.343	308.665	694.186	287.357	268.016	727.743	48.3748	202.868	743.739	62.8818	216.322	761.91	-11.6983	202.332	730.308	-100.687	-252.225	674.059	267.514	-225.721	727.643	20.477	-160.361	742.333	38.6756	-178.872	760.105	-36.8093	-145.317	730.417	-120.731
471	4.7	15.545	1159.44	86.5673	88.1206	1156.86	130.506	-54.5348	1165.97	126.927	185.569	991.051	240.998	-148.17	980.824	248.317	9.63385	957.881	175.31	308.691	694.212	287.36	268.02	727.742	48.3528	202.887	743.742	62.8758	216.341	761.872	-11.6815	202.356	730.312	-100.697	-252.23	674.108	267.539	-225.707	727.638	20.4372	-160.339	742.339	38.6439	-178.878	760.174	-36.9436	-145.315	730.469	-120.815
472	4.71	15.6427	1159.48	86.5684	88.19	1156.87	130.536	-54.4673	1166	126.865	185.594	991.084	240.962	-148.165	980.862	248.306	9.67232	957.935	175.225	308.723	694.245	287.334	268.056	727.77	48.3415	202.919	743.782	62.8569	216.369	761.868	-11.6641	202.39	730.323	-100.676	-252.243	674.15	267.535	-225.68	727.659	20.4292	-160.332	742.365	38.648	-178.833	760.274	-37.0731	-145.298	730.403	-120.718
473	4.72	15.7133	1159.5	86.6173	88.2521	1156.87	130.564	-54.416	1166.04	126.874	185.611	991.121	240.952	-148.174	980.91	248.295	9.68748	957.979	175.217	308.75	694.288	287.317	268.074	727.804	48.3433	202.947	743.808	62.8671	216.396	761.876	-11.6365	202.404	730.354	-100.692	-252.267	674.198	267.536	-225.669	727.655	20.4811	-160.325	742.391	38.6619	-178.811	760.334	-37.0866	-145.286	730.386	-120.672
474	4.73	15.7676	1159.51	86.6159	88.2904	1156.87	130.58	-54.3755	1166.06	126.849	185.615	991.155	240.908	-148.188	980.941	248.273	9.69253	958.011	175.194	308.766	694.329	287.284	268.077	727.834	48.3153	202.96	743.81	62.876	216.417	761.887	-11.6309	202.403	730.384	-100.744	-252.299	674.238	267.541	-225.663	727.649	20.4854	-160.319	742.385	38.6636	-178.817	760.349	-37.0803	-145.281	730.374	-120.68
475	4.74	15.8151	1159.52	86.6091	88.3293	1156.85	130.613	-54.3456	1166.06	126.816	185.611	991.188	240.875	-148.206	980.946	248.269	9.7106	958.037	175.146	308.787	694.362	287.291	268.068	727.825	48.3079	202.961	743.819	62.8597	216.428	761.909	-11.6591	202.392	730.376	-100.749	-252.338	674.242	267.525	-225.673	727.65	20.4605	-160.33	742.366	38.6598	-178.84	760.271	-37.0446	-145.287	730.378	-120.695
476	4.75	15.8304	1159.51	86.6104	88.3458	1156.81	130.626	-54.3402	1166.06	126.82	185.597	991.207	240.878	-148.249	980.954	248.289	9.68498	958.065	175.128	308.796	694.384	287.303	268.06	727.796	48.3277	202.951	743.808	62.8838	216.412	761.949	-11.6805	202.388	730.366	-100.743	-252.399	674.231	267.5	-225.699	727.634	20.4655	-160.356	742.364	38.692	-178.852	760.163	-36.9007	-145.301	730.393	-120.71
477	4.76	15.8315	1159.47	86.634	88.3632	1156.79	130.62	-54.3419	1166.06	126.838	185.597	991.239	240.884	-148.268	980.98	248.273	9.65205	958.07	175.198	308.828	694.417	287.298	268.058	727.766	48.3578	202.933	743.801	62.904	216.385	761.94	-11.6863	202.365	730.339	-100.696	-252.44	674.244	267.475	-225.718	727.627	20.4664	-160.369	742.362	38.713	-178.851	760.09	-36.7264	-145.284	730.422	-120.734
478	4.77	15.8511	1159.43	86.6458	88.3589	1156.8	130.6	-54.3154	1166.05	126.821	185.615	991.284	240.864	-148.241	981	248.253	9.65751	958.072	175.245	308.875	694.449	287.271	268.076	727.766	48.3519	202.93	743.802	62.9093	216.378	761.928	-11.6825	202.355	730.33	-100.669	-252.44	674.264	267.437	-225.707	727.644	20.4362	-160.356	742.359	38.7182	-178.821	760.092	-36.7301	-145.271	730.482	-120.836
479	4.78	15.879	1159.4	86.6273	88.3822	1156.79	130.581	-54.2832	1166.03	126.747	185.642	991.323	240.841	-148.203	981.028	248.236	9.68529	958.101	175.219	308.903	694.483	287.248	268.105	727.785	48.3401	202.942	743.815	62.9053	216.38	761.916	-11.6641	202.365	730.349	-100.696	-252.437	674.306	267.399	-225.687	727.674	20.4132	-160.331	742.401	38.6601	-178.794	760.168	-36.8408	-145.252	730.512	-120.905
480	4.79	15.9105	1159.4	86.6067	88.4137	1156.78	130.59	-54.2486	1166.02	126.688	185.661	991.35	240.849	-148.188	981.068	248.225	9.71697	958.163	175.162	308.919	694.483	287.245	268.125	727.798	48.3572	202.965	743.839	62.8717	216.374	761.9	-11.6769	202.392	730.371	-100.739	-252.422	674.37	267.448	-225.66	727.676	20.4214	-160.297	742.439	38.5962	-178.769	760.254	-36.9629	-145.234	730.532	-120.937
481	4.8	15.9154	1159.4	86.5826	88.4205	1156.78	130.572	-54.234	1166	126.66	185.681	991.367	240.865	-148.169	981.099	248.246	9.7638	958.218	175.09	308.92	694.487	287.266	268.138	727.81	48.357	202.993	743.86	62.8609	216.39	761.889	-11.6917	202.425	730.392	-100.766	-252.4	674.434	267.508	-225.642	727.683	20.4322	-160.277	742.455	38.5981	-178.769	760.354	-37.0943	-145.218	730.502	-120.871
482	4.81	15.8856	1159.37	86.5396	88.4049	1156.76	130.535	-54.2648	1165.97	126.638	185.686	991.383	240.884	-148.164	981.117	248.27	9.78881	958.244	175.089	308.91	694.495	287.269	268.129	727.816	48.3268	202.986	743.876	62.8411	216.393	761.882	-11.7101	202.425	730.398	-100.752	-252.413	674.481	267.529	-225.634	727.68	20.4168	-160.279	742.462	38.5957	-178.788	760.415	-37.2259	-145.218	730.42	-120.742
483	4.82	15.8342	1159.3	86.5688	88.3646	1156.74	130.541	-54.3259	1165.89	126.669	185.668	991.389	240.876	-148.184	981.142	248.271	9.76637	958.225	175.125	308.893	694.497	287.249	268.095	727.812	48.2939	202.964	743.863	62.8484	216.38	761.878	-11.6787	202.388	730.375	-100.73	-252.47	674.504	267.509	-225.663	727.674	20.3968	-160.321	742.417	38.6235	-178.803	760.327	-37.1536	-145.251	730.37	-120.687
484	4.83	15.7423	1159.21	86.6091	88.295	1156.69	130.542	-54.3957	1165.8	126.751	185.657	991.396	240.885	-148.213	981.16	248.257	9.71907	958.198	175.17	308.892	694.512	287.255	268.05	727.808	48.2668	202.93	743.827	62.8666	216.346	761.896	-11.7111	202.347	730.329	-100.699	-252.532	674.5	267.469	-225.699	727.639	20.4237	-160.37	742.362	38.6585	-178.818	760.151	-36.9371	-145.302	730.352	-120.686
485	4.84	15.6565	1159.16	86.6562	88.2189	1156.67	130.49	-54.4563	1165.74	126.802	185.66	991.406	240.911	-148.233	981.165	248.272	9.67842	958.183	175.191	308.888	694.525	287.26	268.013	727.797	48.2336	202.904	743.796	62.8762	216.316	761.914	-11.7408	202.311	730.302	-100.686	-252.545	674.472	267.426	-225.721	727.615	20.4615	-160.393	742.341	38.7123	-178.84	760.047	-36.8222	-145.322	730.382	-120.734
486	4.85	15.5933	1159.14	86.6578	88.1726	1156.66	130.444	-54.5053	1165.72	126.871	185.672	991.407	240.952	-148.24	981.168	248.316	9.65713	958.207	175.175	308.877	694.512	287.252	268.003	727.778	48.2578	202.892	743.809	62.8775	216.306	761.914	-11.7465	202.294	730.307	-100.678	-252.556	674.48	267.441	-225.741	727.606	20.46	-160.402	742.348	38.7269	-178.846	760.037	-36.7998	-145.328	730.431	-120.79
487	4.86	15.5575	1159.13	86.6366	88.1465	1156.69	130.4	-54.5256	1165.73	126.874	185.69	991.42	240.983	-148.232	981.184	248.315	9.66963	958.272	175.12	308.888	694.494	287.239	268.031	727.778	48.3003	202.912	743.833	62.8676	216.305	761.921	-11.7187	202.306	730.326	-100.684	-252.541	674.522	267.489	-225.729	727.625	20.437	-160.392	742.379	38.6878	-178.842	760.111	-36.8923	-145.323	730.382	-120.69
488	4.87	15.5674	1159.19	86.5431	88.1851	1156.72	130.374	-54.4963	1165.76	126.81	185.736	991.442	240.986	-148.165	981.221	248.316	9.73476	958.367	174.997	308.926	694.496	287.237	268.095	727.801	48.3447	202.969	743.874	62.8548	216.343	761.922	-11.7091	202.354	730.384	-100.736	-252.479	674.58	267.518	-225.69	727.652	20.4229	-160.338	742.427	38.6427	-178.809	760.254	-37.0502	-145.278	730.421	-120.77
489	4.88	15.601	1159.23	86.4765	88.2291	1156.73	130.353	-54.4496	1165.79	126.759	185.802	991.47	240.992	-148.081	981.266	248.319	9.82339	958.418	174.919	308.977	694.515	287.236	268.165	727.827	48.3294	203.023	743.923	62.8354	216.407	761.908	-11.6957	202.415	730.445	-100.818	-252.418	674.664	267.575	-225.629	727.69	20.3952	-160.268	742.469	38.6057	-178.776	760.397	-37.2022	-145.207	730.525	-120.929
490	4.89	15.6015	1159.24	86.4913	88.2508	1156.73	130.348	-54.4443	1165.78	126.775	185.821	991.479	240.98	-148.06	981.29	248.331	9.87485	958.416	174.926	309.016	694.537	287.254	268.205	727.828	48.3303	203.046	743.924	62.8404	216.451	761.901	-11.6724	202.451	730.437	-100.819	-252.41	674.697	267.616	-225.592	727.697	20.3862	-160.232	742.476	38.5766	-178.732	760.418	-37.1828	-145.176	730.54	-120.953
491	4.9	15.5787	1159.17	86.6128	88.2225	1156.7	130.374	-54.4887	1165.75	126.833	185.797	991.484	240.972	-148.089	981.28	248.359	9.85348	958.375	174.973	308.999	694.564	287.259	268.178	727.823	48.3402	203.028	743.893	62.8543	216.448	761.91	-11.6611	202.448	730.364	-100.705	-252.469	674.691	267.619	-225.627	727.673	20.4134	-160.257	742.454	38.6078	-178.744	760.327	-37.0499	-145.204	730.504	-120.894
492	4.91	15.5132	1159.11	86.6786	88.1631	1156.66	130.385	-54.5488	1165.7	126.943	185.767	991.5	240.982	-148.146	981.277	248.397	9.78049	958.345	175.082	308.979	694.584	287.259	268.119	727.801	48.3403	202.979	743.867	62.8703	216.402	761.916	-11.6745	202.407	730.321	-100.635	-252.54	674.654	267.574	-225.68	727.638	20.455	-160.317	742.409	38.6722	-178.797	760.195	-36.9027	-145.239	730.4	-120.725
493	4.92	15.419	1159.08	86.6983	88.0957	1156.66	130.35	-54.6041	1165.68	127.024	185.726	991.534	240.961	-148.203	981.289	248.402	9.70248	958.336	175.154	308.982	694.63	287.255	268.062	727.793	48.2788	202.918	743.851	62.8655	216.328	761.954	-11.7427	202.328	730.302	-100.649	-252.599	674.645	267.532	-225.712	727.631	20.4692	-160.369	742.361	38.7051	-178.85	760.08	-36.8333	-145.274	730.359	-120.648
494	4.93	15.3783	1159.09	86.6822	88.0529	1156.68	130.308	-54.631	1165.7	127.021	185.688	991.575	240.919	-148.244	981.317	248.394	9.64775	958.39	175.129	308.977	694.685	287.236	268.025	727.821	48.1995	202.879	743.855	62.8389	216.277	761.994	-11.8116	202.278	730.315	-100.696	-252.622	674.66	267.498	-225.725	727.648	20.4207	-160.394	742.36	38.71	-178.873	760.041	-36.7977	-145.32	730.363	-120.655
495	4.94	15.4234	1159.12	86.6496	88.0769	1156.69	130.324	-54.6089	1165.74	126.982	185.692	991.613	240.892	-148.244	981.341	248.38	9.66298	958.464	175.078	308.986	694.735	287.198	268.042	727.854	48.1852	202.901	743.895	62.8215	216.279	761.994	-11.7991	202.292	730.343	-100.739	-252.609	674.685	267.477	-225.721	727.658	20.3858	-160.38	742.393	38.6669	-178.837	760.097	-36.8531	-145.302	730.375	-120.698
496	4.95	15.5118	1159.16	86.6176	88.1465	1156.71	130.351	-54.5386	1165.77	126.947	185.725	991.647	240.885	-148.206	981.345	248.388	9.71275	958.526	175.058	309.043	694.761	287.183	268.11	727.857	48.2226	202.942	743.923	62.7893	216.297	761.961	-11.7741	202.33	730.36	-100.733	-252.568	674.724	267.535	-225.691	727.661	20.382	-160.336	742.434	38.6138	-178.781	760.226	-36.9606	-145.256	730.384	-120.731
497	4.96	15.5703	1159.2	86.6248	88.2141	1156.7	130.404	-54.4796	1165.81	126.911	185.744	991.679	240.905	-148.182	981.349	248.434	9.72435	958.587	175.031	309.089	694.773	287.168	268.143	727.851	48.2527	202.978	743.934	62.7849	216.313	761.924	-11.7482	202.361	730.387	-100.758	-252.505	674.76	267.611	-225.659	727.66	20.4022	-160.295	742.468	38.6095	-178.755	760.326	-37.0615	-145.232	730.43	-120.803
498	4.97	15.6184	1159.24	86.6196	88.2562	1156.68	130.465	-54.435	1165.85	126.873	185.745	991.7	240.894	-148.177	981.343	248.457	9.71928	958.61	175.057	309.131	694.801	287.169	268.158	727.842	48.2625	202.989	743.959	62.7651	216.318	761.901	-11.7065	202.373	730.407	-100.756	-252.473	674.791	267.656	-225.647	727.656	20.3998	-160.276	742.482	38.5713	-178.752	760.403	-37.1409	-145.238	730.48	-120.869
499	4.98	15.6412	1159.21	86.6693	88.2481	1156.66	130.491	-54.4202	1165.85	126.882	185.726	991.721	240.874	-148.19	981.345	248.468	9.70372	958.603	175.097	309.176	694.862	287.15	268.146	727.84	48.2542	202.967	743.948	62.7708	216.303	761.909	-11.6989	202.352	730.376	-100.747	-252.492	674.793	267.619	-225.656	727.668	20.3904	-160.297	742.469	38.5915	-178.76	760.333	-37.1026	-145.247	730.455	-120.826
500	4.99	15.6359	1159.17	86.7071	88.2338	1156.65	130.503	-54.4199	1165.83	126.9	185.702	991.74	240.867	-148.227	981.365	248.458	9.65217	958.586	175.076	309.21	694.932	287.141	268.111	727.831	48.1897	202.943	743.909	62.821	216.28	761.924	-11.7492	202.295	730.343	-100.758	-252.515	674.772	267.575	-225.676	727.674	20.3847	-160.326	742.423	38.632	-178.81	760.207	-37.0235	-145.255	730.503	-120.933
501	5	15.6166	1159.15	86.6917	88.2414	1156.62	130.526	-54.4222	1165.82	126.92	185.66	991.757	240.842	-148.272	981.38	248.45	9.58951	958.569	175.082	309.202	694.975	287.143	268.081	727.828	48.1422	202.925	743.89	62.8055	216.277	761.933	-11.8031	202.256	730.344	-100.78	-252.533	674.729	267.548	-225.698	727.652	20.3864	-160.347	742.4	38.6597	-178.854	760.105	-36.9217	-145.269	730.485	-120.9
502	5.01	15.6427	1159.15	86.7044	88.2659	1156.6	130.546	-54.3956	1165.81	126.947	185.634	991.772	240.849	-148.311	981.384	248.467	9.55903	958.57	175.118	309.194	695.031	287.195	268.056	727.83	48.1349	202.909	743.881	62.7952	216.257	761.938	-11.8224	202.236	730.353	-100.799	-252.561	674.698	267.546	-225.721	727.639	20.4081	-160.363	742.399	38.6503	-178.863	760.065	-36.8617	-145.282	730.441	-120.812
503	5.02	15.7168	1159.15	86.7439	88.3166	1156.61	130.592	-54.3671	1165.81	126.933	185.625	991.797	240.854	-148.324	981.4	248.475	9.54659	958.611	175.106	309.203	695.051	287.17	268.052	727.846	48.1526	202.911	743.884	62.8166	216.241	761.954	-11.8104	202.24	730.347	-100.758	-252.561	674.706	267.532	-225.719	727.641	20.4386	-160.368	742.413	38.6625	-178.844	760.081	-36.8772	-145.275	730.496	-120.915
504	5.03	15.796	1159.17	86.7264	88.3756	1156.61	130.588	-54.3228	1165.84	126.88	185.637	991.828	240.84	-148.316	981.418	248.455	9.56947	958.693	175.042	309.22	695.047	287.132	268.08	727.88	48.1564	202.954	743.917	62.8062	216.279	761.925	-11.7672	202.275	730.358	-100.726	-252.544	674.758	267.567	-225.687	727.652	20.4193	-160.343	742.43	38.6309	-178.806	760.174	-36.9285	-145.275	730.48	-120.899
505	5.04	15.8747	1159.21	86.6796	88.4594	1156.59	130.611	-54.2379	1165.87	126.833	185.672	991.849	240.827	-148.28	981.436	248.431	9.63037	958.763	174.984	309.252	695.04	287.108	268.138	727.896	48.1595	203.009	743.935	62.7956	216.333	761.871	-11.7258	202.34	730.39	-100.73	-252.495	674.798	267.598	-225.66	727.674	20.4154	-160.302	742.46	38.5904	-178.764	760.321	-37.0439	-145.239	730.439	-120.829
506	5.05	15.9533	1159.23	86.6714	88.541	1156.56	130.656	-54.1511	1165.87	126.83	185.71	991.854	240.829	-148.242	981.443	248.434	9.69032	958.785	174.978	309.292	695.026	287.094	268.197	727.896	48.2119	203.05	743.951	62.7751	216.381	761.858	-11.685	202.395	730.394	-100.737	-252.45	674.826	267.633	-225.631	727.678	20.4388	-160.26	742.477	38.5799	-178.741	760.383	-37.1255	-145.186	730.498	-120.896
507	5.06	15.9902	1159.2	86.6835	88.5783	1156.52	130.66	-54.1151	1165.85	126.788	185.712	991.846	240.803	-148.23	981.435	248.414	9.69793	958.769	174.969	309.292	695.017	287.082	268.225	727.851	48.2788	203.037	743.965	62.7696	216.394	761.856	-11.6933	202.407	730.37	-100.73	-252.452	674.816	267.617	-225.624	727.664	20.4358	-160.261	742.466	38.5955	-178.731	760.36	-37.1211	-145.182	730.476	-120.893
508	5.07	15.9679	1159.15	86.6683	88.5539	1156.5	130.644	-54.1365	1165.83	126.775	185.682	991.835	240.782	-148.255	981.424	248.383	9.661	958.758	174.991	309.274	695.037	287.086	268.192	727.807	48.287	202.991	743.94	62.7659	216.366	761.896	-11.7466	202.372	730.358	-100.749	-252.503	674.794	267.577	-225.649	727.655	20.4054	-160.303	742.438	38.6035	-178.745	760.234	-36.9633	-145.216	730.42	-120.825
509	5.08	15.9018	1159.1	86.6771	88.473	1156.51	130.561	-54.1941	1165.81	126.806	185.651	991.834	240.759	-148.285	981.447	248.374	9.59195	958.746	175.031	309.251	695.095	287.138	268.13	727.794	48.2685	202.939	743.914	62.7743	216.298	761.937	-11.7934	202.294	730.364	-100.785	-252.561	674.777	267.53	-225.686	727.65	20.3798	-160.342	742.423	38.6258	-178.791	760.108	-36.8163	-145.249	730.485	-120.909
510	5.09	15.8445	1159.06	86.6987	88.4113	1156.51	130.496	-54.2435	1165.8	126.834	185.629	991.84	240.747	-148.318	981.479	248.363	9.51285	958.732	175.059	309.229	695.152	287.177	268.069	727.802	48.2226	202.877	743.895	62.7673	216.206	761.955	-11.8484	202.213	730.347	-100.766	-252.616	674.798	267.512	-225.735	727.66	20.3894	-160.385	742.41	38.6399	-178.859	760.026	-36.7766	-145.279	730.5	-120.925
511	5.1	15.8473	1159.04	86.748	88.4249	1156.49	130.506	-54.2371	1165.82	126.801	185.626	991.844	240.717	-148.328	981.495	248.358	9.51394	958.72	175.066	309.191	695.147	287.182	268.029	727.84	48.1697	202.847	743.901	62.7541	216.178	761.96	-11.842	202.21	730.317	-100.738	-252.659	674.841	267.504	-225.747	727.66	20.3884	-160.396	742.424	38.64	-178.857	760.038	-36.85	-145.289	730.505	-120.952
512	5.11	15.8889	1159.09	86.7017	88.4901	1156.5	130.495	-54.1864	1165.86	126.765	185.638	991.859	240.708	-148.306	981.514	248.362	9.56818	958.759	175.016	309.175	695.104	287.153	268.055	727.88	48.1307	202.881	743.94	62.7288	216.223	761.93	-11.783	202.254	730.321	-100.726	-252.665	674.926	267.533	-225.717	727.659	20.3829	-160.365	742.455	38.6241	-178.83	760.176	-37.0009	-145.281	730.48	-120.906
513	5.12	15.9506	1159.14	86.6569	88.5568	1156.53	130.455	-54.1335	1165.89	126.739	185.674	991.869	240.716	-148.258	981.531	248.359	9.64398	958.832	174.959	309.173	695.065	287.127	268.088	727.916	48.1231	202.941	743.985	62.7073	216.27	761.912	-11.7641	202.308	730.37	-100.753	-252.633	675.015	267.603	-225.678	727.673	20.4074	-160.319	742.477	38.5985	-178.805	760.327	-37.1557	-145.244	730.44	-120.808
514	5.13	16.0144	1159.19	86.5757	88.6018	1156.56	130.423	-54.0717	1165.92	126.696	185.715	991.865	240.689	-148.214	981.551	248.331	9.70585	958.876	174.91	309.165	695.042	287.142	268.123	727.928	48.1433	202.994	744.006	62.7195	216.323	761.901	-11.7651	202.369	730.412	-100.783	-252.614	675.073	267.661	-225.635	727.687	20.4139	-160.282	742.498	38.5635	-178.787	760.441	-37.2614	-145.21	730.483	-120.886
515	5.14	16.0447	1159.2	86.5425	88.6334	1156.55	130.421	-54.0531	1165.9	126.673	185.743	991.848	240.667	-148.186	981.554	248.292	9.73453	958.884	174.842	309.15	695.013	287.124	268.146	727.919	48.1435	203.002	744.003	62.7166	216.34	761.913	-11.7654	202.387	730.425	-100.837	-252.604	675.087	267.641	-225.617	727.674	20.3843	-160.284	742.489	38.5415	-178.773	760.435	-37.2585	-145.209	730.409	-120.819
516	5.15	16.0104	1159.16	86.5792	88.6066	1156.52	130.422	-54.0857	1165.86	126.718	185.744	991.815	240.659	-148.188	981.54	248.28	9.71652	958.836	174.895	309.14	694.995	287.112	268.142	727.873	48.1633	202.986	743.972	62.7307	216.33	761.925	-11.7642	202.34	730.387	-100.836	-252.609	675.033	267.608	-225.654	727.652	20.3757	-160.306	742.458	38.5579	-178.789	760.263	-37.0293	-145.236	730.364	-120.777
517	5.16	15.932	1159.09	86.6881	88.5308	1156.5	130.391	-54.1362	1165.83	126.794	185.727	991.785	240.661	-148.212	981.525	248.291	9.65025	958.777	174.954	309.14	694.979	287.132	268.094	727.817	48.1899	202.933	743.929	62.7651	216.281	761.944	-11.8306	202.278	730.345	-100.786	-252.642	674.965	267.572	-225.692	727.634	20.3993	-160.354	742.426	38.6038	-178.807	760.044	-36.7574	-145.276	730.347	-120.748
518	5.17	15.8837	1159.06	86.708	88.4986	1156.5	130.365	-54.1692	1165.81	126.822	185.718	991.762	240.664	-148.214	981.518	248.274	9.59884	958.76	174.913	309.137	694.959	287.159	268.064	727.786	48.2125	202.901	743.898	62.7789	216.237	761.954	-11.8466	202.239	730.332	-100.786	-252.675	674.926	267.534	-225.728	727.617	20.4192	-160.38	742.396	38.6517	-178.826	759.975	-36.7324	-145.308	730.386	-120.785
519	5.18	15.9134	1159.08	86.6771	88.5239	1156.49	130.379	-54.1624	1165.83	126.787	185.727	991.754	240.633	-148.191	981.519	248.25	9.62663	958.754	174.887	309.121	694.945	287.15	268.076	727.792	48.2039	202.903	743.887	62.7737	216.243	761.942	-11.8068	202.244	730.31	-100.754	-252.685	674.939	267.515	-225.731	727.62	20.3952	-160.38	742.396	38.6641	-178.821	760.005	-36.8091	-145.3	730.428	-120.861
520	5.19	15.9972	1159.1	86.7028	88.6037	1156.48	130.41	-54.0988	1165.85	126.774	185.756	991.755	240.629	-148.15	981.535	248.245	9.70737	958.793	174.866	309.121	694.941	287.14	268.098	727.827	48.2005	202.945	743.921	62.7588	216.322	761.901	-11.7568	202.317	730.307	-100.709	-252.647	675.012	267.548	-225.697	727.641	20.3759	-160.333	742.443	38.6272	-178.809	760.113	-36.8898	-145.258	730.407	-120.837
521	5.2	16.1027	1159.16	86.6467	88.7002	1156.5	130.432	-53.9935	1165.9	126.744	185.802	991.764	240.633	-148.093	981.556	248.252	9.80181	958.833	174.803	309.126	694.921	287.136	268.161	727.871	48.1867	203.02	743.943	62.7426	216.427	761.849	-11.7042	202.411	730.357	-100.736	-252.596	675.075	267.605	-225.642	727.661	20.3667	-160.26	742.487	38.5743	-178.752	760.296	-37.1089	-145.196	730.493	-120.935
522	5.21	16.1636	1159.21	86.5911	88.7691	1156.51	130.441	-53.9299	1165.92	126.689	185.825	991.78	240.639	-148.061	981.567	248.24	9.85682	958.86	174.741	309.131	694.905	287.155	268.194	727.901	48.1958	203.055	743.955	62.7496	216.44	761.841	-11.6894	202.46	730.413	-100.804	-252.552	675.093	267.642	-225.598	727.685	20.3557	-160.233	742.5	38.5467	-178.698	760.417	-37.2027	-145.165	730.476	-120.895
523	5.22	16.1433	1159.23	86.5569	88.7541	1156.53	130.452	-53.9483	1165.93	126.689	185.813	991.779	240.661	-148.08	981.556	248.267	9.84433	958.884	174.736	309.11	694.891	287.178	268.178	727.89	48.2494	203.033	743.963	62.7792	216.393	761.862	-11.6862	202.424	730.424	-100.81	-252.534	675.092	267.688	-225.6	727.678	20.3897	-160.255	742.487	38.5441	-178.703	760.425	-37.158	-145.189	730.44	-120.836
524	5.23	16.0869	1159.23	86.5453	88.679	1156.55	130.417	-54.0084	1165.93	126.743	185.78	991.751	240.665	-148.127	981.543	248.254	9.77539	958.894	174.746	309.092	694.891	287.181	268.143	727.859	48.2672	202.989	743.967	62.7904	216.33	761.905	-11.7303	202.33	730.427	-100.8	-252.538	675.033	267.679	-225.658	727.67	20.4163	-160.3	742.476	38.5853	-178.726	760.305	-36.9967	-145.241	730.469	-120.864
525	5.24	16.0293	1159.2	86.5007	88.6145	1156.55	130.326	-54.0504	1165.89	126.753	185.748	991.721	240.626	-148.157	981.513	248.173	9.7002	958.88	174.672	309.095	694.919	287.18	268.104	727.803	48.2159	202.936	743.942	62.7583	216.263	761.948	-11.8272	202.25	730.441	-100.871	-252.541	674.922	267.582	-225.712	727.674	20.395	-160.364	742.468	38.5953	-178.785	760.144	-36.8948	-145.296	730.399	-120.752
526	5.25	16.0045	1159.17	86.474	88.5726	1156.53	130.311	-54.078	1165.86	126.751	185.722	991.706	240.595	-148.172	981.49	248.143	9.63152	958.839	174.62	309.108	694.95	287.194	268.068	727.773	48.1985	202.889	743.9	62.7458	216.217	761.966	-11.8835	202.205	730.421	-100.891	-252.548	674.853	267.508	-225.741	727.668	20.3583	-160.411	742.437	38.6179	-178.824	760.016	-36.8484	-145.337	730.395	-120.774
527	5.26	16.0139	1159.12	86.5645	88.5735	1156.5	130.386	-54.0808	1165.83	126.771	185.715	991.709	240.63	-148.174	981.474	248.162	9.63026	958.773	174.719	309.1	694.94	287.218	268.059	727.753	48.2505	202.879	743.884	62.7768	216.219	761.962	-11.8607	202.215	730.355	-100.79	-252.566	674.855	267.553	-225.74	727.646	20.391	-160.41	742.411	38.654	-178.841	759.979	-36.7778	-145.323	730.424	-120.839
528	5.27	16.0794	1159.11	86.6343	88.6521	1156.46	130.446	-54.0344	1165.82	126.748	185.732	991.696	240.642	-148.171	981.453	248.151	9.70481	958.746	174.738	309.081	694.897	287.202	268.095	727.774	48.2568	202.923	743.865	62.7787	216.284	761.91	-11.7701	202.276	730.287	-100.691	-252.541	674.874	267.574	-225.703	727.633	20.4047	-160.355	742.404	38.6448	-178.822	760.063	-36.8623	-145.265	730.471	-120.921
529	5.28	16.1805	1159.12	86.6549	88.7542	1156.44	130.482	-53.9531	1165.84	126.716	185.77	991.68	240.643	-148.137	981.44	248.132	9.78959	958.736	174.728	309.097	694.854	287.172	268.141	727.824	48.2342	202.986	743.87	62.7545	216.364	761.835	-11.7139	202.363	730.261	-100.651	-252.498	674.918	267.597	-225.647	727.627	20.4028	-160.298	742.431	38.5747	-178.787	760.255	-37.1061	-145.222	730.465	-120.933
530	5.29	16.2634	1159.14	86.6436	88.8162	1156.44	130.522	-53.8829	1165.86	126.731	185.793	991.688	240.645	-148.109	981.441	248.135	9.84114	958.734	174.724	309.109	694.865	287.171	268.161	727.879	48.2397	203.02	743.902	62.7214	216.446	761.789	-11.6128	202.439	730.267	-100.604	-252.472	674.991	267.658	-225.608	727.659	20.3986	-160.251	742.453	38.5617	-178.78	760.422	-37.2954	-145.199	730.468	-120.936
531	5.3	16.318	1159.16	86.6117	88.8226	1156.46	130.55	-53.8517	1165.87	126.701	185.787	991.714	240.647	-148.103	981.442	248.128	9.85508	958.741	174.706	309.094	694.881	287.182	268.171	727.909	48.2387	203.029	743.91	62.7558	216.482	761.818	-11.6016	202.451	730.307	-100.628	-252.449	675.007	267.685	-225.594	727.676	20.3958	-160.24	742.46	38.5813	-178.775	760.461	-37.3268	-145.181	730.444	-120.897
532	5.31	16.3174	1159.2	86.4954	88.797	1156.48	130.48	-53.8693	1165.87	126.629	185.75	991.722	240.595	-148.124	981.429	248.065	9.8345	958.777	174.55	309.058	694.867	287.171	268.148	727.895	48.174	203.012	743.916	62.7559	216.433	761.863	-11.7131	202.419	730.368	-100.757	-252.441	674.93	267.628	-225.615	727.667	20.371	-160.25	742.456	38.5563	-178.784	760.379	-37.2691	-145.203	730.389	-120.808
533	5.32	16.2534	1159.19	86.4056	88.7267	1156.5	130.363	-53.929	1165.85	126.593	185.705	991.703	240.578	-148.172	981.397	248.012	9.75247	958.791	174.433	309.017	694.861	287.167	268.116	727.857	48.1566	202.966	743.933	62.7378	216.351	761.929	-11.8174	202.336	730.406	-100.854	-252.461	674.79	267.528	-225.672	727.658	20.3701	-160.304	742.435	38.5976	-178.805	760.227	-37.1015	-145.259	730.383	-120.768
534	5.33	16.1558	1159.16	86.4322	88.6388	1156.53	130.357	-54.008	1165.81	126.646	185.668	991.684	240.603	-148.233	981.373	248.02	9.63536	958.76	174.491	308.999	694.881	287.211	268.064	727.811	48.1958	202.902	743.914	62.7627	216.262	762.017	-11.8545	202.246	730.43	-100.859	-252.488	674.699	267.509	-225.735	727.665	20.4192	-160.398	742.412	38.6849	-178.858	760.066	-36.8417	-145.329	730.385	-120.716
535	5.34	16.0913	1159.13	86.4618	88.5996	1156.51	130.358	-54.0623	1165.8	126.655	185.637	991.681	240.591	-148.258	981.343	248.012	9.56794	958.745	174.487	308.987	694.904	287.243	268.049	727.784	48.2428	202.862	743.912	62.7585	216.199	762.045	-11.8911	202.198	730.441	-100.869	-252.48	674.645	267.484	-225.768	727.668	20.4348	-160.438	742.415	38.6967	-178.849	759.986	-36.7596	-145.361	730.38	-120.709
536	5.35	16.1055	1159.13	86.4154	88.6134	1156.5	130.332	-54.0492	1165.8	126.617	185.642	991.684	240.56	-148.254	981.338	247.984	9.60742	958.76	174.394	308.989	694.904	287.221	268.071	727.795	48.2382	202.883	743.927	62.7407	216.209	762.014	-11.8601	202.229	730.427	-100.855	-252.434	674.635	267.467	-225.743	727.676	20.3905	-160.409	742.427	38.6533	-178.816	760.057	-36.8681	-145.343	730.395	-120.736
537	5.36	16.193	1159.14	86.44	88.6956	1156.49	130.382	-53.9914	1165.81	126.584	185.68	991.7	240.563	-148.205	981.351	247.989	9.7286	958.733	174.429	309.01	694.887	287.216	268.126	727.832	48.2408	202.959	743.928	62.7658	216.293	761.955	-11.7759	202.324	730.419	-100.817	-252.385	674.692	267.523	-225.669	727.693	20.3861	-160.331	742.451	38.6218	-178.752	760.189	-36.9274	-145.281	730.396	-120.739
538	5.37	16.2831	1159.14	86.4717	88.7649	1156.47	130.433	-53.9321	1165.82	126.549	185.712	991.707	240.581	-148.175	981.36	248.02	9.81715	958.704	174.464	309.022	694.865	287.223	268.173	727.873	48.2655	203.021	743.922	62.7832	216.385	761.892	-11.694	202.424	730.413	-100.781	-252.356	674.766	267.602	-225.606	727.699	20.404	-160.258	742.472	38.5856	-178.692	760.317	-37.008	-145.211	730.395	-120.747
539	5.38	16.3147	1159.13	86.4416	88.7807	1156.44	130.439	-53.9137	1165.79	126.512	185.705	991.688	240.579	-148.179	981.314	248.006	9.84673	958.689	174.428	309.012	694.835	287.223	268.183	727.89	48.2311	203.056	743.897	62.8034	216.44	761.84	-11.6829	202.476	730.395	-100.777	-252.362	674.769	267.657	-225.584	727.668	20.409	-160.22	742.481	38.5384	-178.687	760.425	-37.1645	-145.167	730.425	-120.81
540	5.39	16.2616	1159.09	86.4715	88.7481	1156.4	130.424	-53.9476	1165.75	126.495	185.674	991.656	240.555	-148.216	981.271	247.994	9.81578	958.632	174.462	309.002	694.815	287.211	268.162	727.864	48.2418	203.04	743.875	62.8017	216.457	761.816	-11.6523	202.463	730.32	-100.694	-252.376	674.72	267.641	-225.605	727.622	20.4296	-160.242	742.451	38.5583	-178.749	760.397	-37.1473	-145.175	730.444	-120.856
541	5.4	16.1483	1158.99	86.5704	88.6593	1156.33	130.438	-54.0384	1165.68	126.53	185.637	991.638	240.528	-148.274	981.244	247.959	9.71832	958.533	174.565	309	694.826	287.178	268.103	727.818	48.2606	202.969	743.836	62.8104	216.427	761.798	-11.6485	202.389	730.222	-100.569	-252.414	674.651	267.552	-225.659	727.603	20.4206	-160.317	742.391	38.6314	-178.81	760.215	-36.9193	-145.242	730.395	-120.817
542	5.41	16.0317	1158.92	86.5938	88.5505	1156.3	130.374	-54.1354	1165.62	126.577	185.586	991.631	240.491	-148.34	981.216	247.91	9.59721	958.465	174.604	308.985	694.853	287.161	268.198	727.91	48.0757	202.896	743.798	62.8123	216.351	761.81	-11.702	202.301	730.198	-100.574	-252.471	674.576	267.471	-225.719	727.599	20.387	-160.383	742.342	38.6662	-178.857	760.054	-36.8075	-145.307	730.396	-120.855
543	5.42	15.9585	1158.92	86.5581	88.486	1156.34	130.271	-54.1879	1165.61	126.565	185.545	991.639	240.469	-148.374	981.197	247.884	9.53225	958.477	174.524	308.942	694.86	287.166	268.364	728.07	47.858	202.867	743.799	62.8259	216.265	761.885	-11.7648	202.255	730.251	-100.699	-252.485	674.501	267.434	-225.761	727.61	20.3917	-160.413	742.331	38.689	-178.868	760.015	-36.8389	-145.341	730.329	-120.697
544	5.43	15.9502	1158.96	86.4554	88.4673	1156.37	130.209	-54.1945	1165.63	126.502	185.532	991.644	240.453	-148.375	981.183	247.88	9.5202	958.559	174.368	308.934	694.866	287.215	268.129	727.853	48.1521	202.87	743.83	62.8247	216.234	761.927	-11.7818	202.242	730.322	-100.773	-252.464	674.48	267.446	-225.767	727.621	20.4192	-160.408	742.36	38.6658	-178.865	760.064	-36.8897	-145.336	730.343	-120.662
545	5.44	15.982	1159.03	86.2691	88.4845	1156.4	130.167	-54.1564	1165.66	126.419	185.537	991.656	240.419	-148.364	981.19	247.851	9.55002	958.654	174.169	308.925	694.881	287.247	268.098	727.828	48.1985	202.905	743.878	62.8125	216.257	761.945	-11.7997	202.278	730.405	-100.858	-252.415	674.519	267.494	-225.734	727.648	20.403	-160.368	742.412	38.6102	-178.853	760.189	-37.0448	-145.307	730.426	-120.774
546	5.45	16.0377	1159.09	86.1491	88.5246	1156.44	130.097	-54.1172	1165.7	126.297	185.537	991.684	240.387	-148.36	981.207	247.792	9.61463	958.72	174.025	308.903	694.883	287.234	268.11	727.865	48.176	202.961	743.938	62.7719	216.289	761.966	-11.8253	202.346	730.472	-100.925	-252.375	674.564	267.533	-225.701	727.701	20.3434	-160.304	742.46	38.5727	-178.821	760.349	-37.2483	-145.264	730.552	-120.983
547	5.46	16.0959	1159.09	86.1247	88.5604	1156.44	130.074	-54.0912	1165.71	126.259	185.545	991.714	240.352	-148.344	981.214	247.738	9.66194	958.711	174.024	308.9	694.905	287.214	268.122	727.91	48.1755	202.986	743.945	62.7632	216.335	761.945	-11.7777	202.399	730.479	-100.907	-252.365	674.598	267.537	-225.658	727.725	20.3192	-160.26	742.485	38.5471	-178.768	760.438	-37.2884	-145.22	730.572	-121.018
548	5.47	16.0981	1159.03	86.213	88.5743	1156.39	130.079	-54.0997	1165.67	126.296	185.537	991.705	240.339	-148.341	981.198	247.721	9.65484	958.625	174.137	308.914	694.918	287.196	268.105	727.917	48.1619	202.992	743.933	62.7667	216.375	761.907	-11.7602	202.403	730.404	-100.83	-252.381	674.573	267.499	-225.647	727.71	20.3509	-160.266	742.471	38.5575	-178.768	760.334	-37.0904	-145.218	730.562	-120.996
549	5.48	16.0365	1158.95	86.2664	88.5467	1156.33	130.069	-54.1377	1165.61	126.311	185.498	991.665	240.35	-148.379	981.146	247.725	9.60574	958.496	174.27	308.909	694.905	287.212	268.058	727.872	48.1562	202.958	743.883	62.7764	216.379	761.92	-11.7306	202.362	730.326	-100.75	-252.424	674.48	267.469	-225.675	727.666	20.3723	-160.32	742.428	38.6077	-178.815	760.201	-36.9534	-145.247	730.489	-120.902
550	5.49	15.9775	1158.86	86.31	88.488	1156.27	130.07	-54.1939	1165.54	126.331	185.442	991.607	240.349	-148.428	981.066	247.73	9.5386	958.41	174.313	308.873	694.855	287.216	268.025	727.791	48.2358	202.907	743.833	62.8193	216.368	761.907	-11.6881	202.33	730.245	-100.655	-252.479	674.364	267.425	-225.727	727.588	20.4277	-160.373	742.367	38.6579	-178.869	760.087	-36.8505	-145.295	730.386	-120.749
551	5.5	15.9579	1158.81	86.3335	88.4596	1156.24	130.054	-54.2292	1165.49	126.324	185.421	991.57	240.331	-148.457	981.018	247.71	9.48663	958.372	174.323	308.858	694.834	287.225	268.023	727.754	48.275	202.883	743.805	62.822	216.328	761.893	-11.7224	202.296	730.22	-100.639	-252.469	674.303	267.44	-225.755	727.543	20.4594	-160.417	742.301	38.7138	-178.884	760.001	-36.7593	-145.334	730.337	-120.685
552	5.51	15.9728	1158.81	86.291	88.4757	1156.25	130.018	-54.2185	1165.48	126.302	185.433	991.572	240.31	-148.437	981.007	247.663	9.48849	958.391	174.266	308.881	694.846	287.228	268.052	727.758	48.3113	202.886	743.793	62.8096	216.315	761.882	-11.743	202.294	730.242	-100.684	-252.409	674.288	267.433	-225.744	727.551	20.4551	-160.42	742.304	38.7121	-178.859	760.021	-36.7533	-145.341	730.309	-120.646
553	5.52	16.023	1158.85	86.2028	88.5237	1156.28	129.962	-54.1771	1165.5	126.218	185.459	991.593	240.292	-148.405	981.025	247.628	9.5358	958.428	174.149	308.9	694.848	287.214	268.095	727.791	48.3139	202.922	743.819	62.8212	216.331	761.856	-11.7125	202.336	730.28	-100.691	-252.352	674.326	267.45	-225.703	727.586	20.4292	-160.396	742.344	38.6974	-178.8	760.132	-36.8564	-145.311	730.314	-120.635
554	5.53	16.0775	1158.89	86.1154	88.5745	1156.3	129.903	-54.1353	1165.55	126.099	185.484	991.596	240.252	-148.375	981.034	247.601	9.59418	958.472	174.046	308.888	694.824	287.217	268.139	727.826	48.2923	202.967	743.871	62.7936	216.335	761.846	-11.7036	202.393	730.35	-100.74	-252.308	674.365	267.499	-225.662	727.622	20.4217	-160.346	742.397	38.6551	-178.762	760.32	-37.0637	-145.272	730.329	-120.643
555	5.54	16.1061	1158.9	85.9956	88.588	1156.31	129.85	-54.1107	1165.58	126.015	185.479	991.58	240.201	-148.371	981.03	247.565	9.60929	958.494	173.898	308.855	694.807	287.222	268.141	727.851	48.2481	202.997	743.88	62.7912	216.369	761.839	-11.6958	202.418	730.4	-100.807	-252.281	674.391	267.55	-225.651	727.642	20.4062	-160.302	742.43	38.5889	-178.771	760.424	-37.2026	-145.253	730.376	-120.73
556	5.55	16.1383	1158.9	85.9113	88.5781	1156.3	129.816	-54.0979	1165.57	125.972	185.452	991.579	240.176	-148.384	981.036	247.536	9.59212	958.465	173.836	308.84	694.824	287.25	268.104	727.868	48.1935	202.983	743.888	62.7959	216.378	761.869	-11.7372	202.408	730.39	-100.803	-252.285	674.384	267.542	-225.656	727.658	20.3909	-160.275	742.444	38.5914	-178.79	760.384	-37.1775	-145.253	730.41	-120.776
557	5.56	16.1241	1158.84	85.9214	88.5421	1156.26	129.735	-54.1133	1165.51	125.928	185.41	991.58	240.137	-148.424	981.031	247.493	9.55396	958.354	173.86	308.808	694.855	287.263	268.065	727.87	48.142	202.947	743.855	62.8114	216.363	761.887	-11.757	202.362	730.352	-100.787	-252.329	674.352	267.49	-225.684	727.644	20.4099	-160.299	742.43	38.6176	-178.833	760.274	-37.0548	-145.256	730.437	-120.797
558	5.57	16.0599	1158.74	85.9491	88.4831	1156.22	129.649	-54.1681	1165.45	125.936	185.361	991.565	240.105	-148.469	980.999	247.447	9.46591	958.218	173.9	308.783	694.886	287.242	268.01	727.833	48.1341	202.883	743.797	62.8251	216.3	761.918	-11.7978	202.299	730.31	-100.758	-252.39	674.302	267.436	-225.737	727.643	20.3944	-160.367	742.385	38.6415	-178.881	760.084	-36.8284	-145.299	730.515	-120.923
559	5.58	16.0079	1158.7	85.9447	88.4261	1156.18	129.609	-54.2133	1165.41	125.956	185.331	991.547	240.118	-148.497	980.972	247.429	9.38896	958.133	173.909	308.784	694.891	287.246	268.112	727.939	47.9613	202.824	743.785	62.8303	216.25	761.966	-11.808	202.234	730.29	-100.722	-252.418	674.23	267.371	-225.776	727.637	20.3879	-160.423	742.364	38.6942	-178.918	759.985	-36.6979	-145.357	730.495	-120.862
560	5.59	16.0209	1158.72	85.9164	88.4294	1156.18	129.572	-54.211	1165.4	125.945	185.333	991.518	240.136	-148.492	980.934	247.419	9.38207	958.105	173.837	308.795	694.849	287.254	268.322	728.091	47.7914	202.829	743.801	62.8221	216.249	761.956	-11.7756	202.221	730.306	-100.739	-252.402	674.184	267.391	-225.787	727.609	20.4141	-160.447	742.352	38.7148	-178.94	760.013	-36.7535	-145.378	730.406	-120.724
561	5.6	16.0951	1158.75	85.7898	88.495	1156.2	129.505	-54.1666	1165.42	125.826	185.362	991.484	240.114	-148.45	980.893	247.39	9.45571	958.099	173.727	308.8	694.778	287.238	268.127	727.851	48.1512	202.884	743.814	62.8184	216.315	761.917	-11.7001	202.274	730.311	-100.769	-252.352	674.178	267.452	-225.774	727.59	20.4193	-160.413	742.347	38.6858	-178.908	760.138	-36.9668	-145.349	730.383	-120.722
562	5.61	16.2017	1158.78	85.6635	88.5914	1156.21	129.493	-54.0898	1165.45	125.714	185.407	991.475	240.091	-148.385	980.871	247.359	9.55349	958.131	173.598	308.809	694.734	287.221	268.139	727.817	48.2479	202.95	743.853	62.778	216.394	761.885	-11.6677	202.363	730.354	-100.829	-252.3	674.191	267.468	-225.718	727.591	20.4171	-160.349	742.385	38.6321	-178.839	760.313	-37.1359	-145.296	730.365	-120.722
563	5.62	16.3115	1158.75	85.6667	88.6807	1156.21	129.528	-54.0142	1165.46	125.642	185.465	991.478	240.094	-148.322	980.864	247.348	9.64524	958.136	173.588	308.845	694.728	287.226	268.193	727.833	48.3064	203.012	743.861	62.7849	216.459	761.854	-11.6395	202.469	730.376	-100.777	-252.239	674.222	267.492	-225.654	727.609	20.4309	-160.296	742.409	38.6124	-178.796	760.428	-37.2162	-145.233	730.34	-120.702
564	5.63	16.3741	1158.69	85.7034	88.7228	1156.19	129.548	-53.9811	1165.45	125.609	185.482	991.465	240.084	-148.297	980.844	247.304	9.6833	958.08	173.66	308.871	694.743	287.249	268.2	727.848	48.3051	203.026	743.839	62.819	216.492	761.822	-11.5919	202.503	730.336	-100.689	-252.221	674.242	267.505	-225.625	727.603	20.4385	-160.277	742.399	38.5887	-178.78	760.404	-37.1925	-145.218	730.32	-120.691
565	5.64	16.3381	1158.66	85.7231	88.6968	1156.15	129.514	-53.9996	1165.42	125.573	185.443	991.468	240.062	-148.337	980.828	247.297	9.65659	958.022	173.658	308.821	694.751	287.263	268.12	727.839	48.2519	202.993	743.829	62.8291	216.458	761.838	-11.6216	202.452	730.299	-100.68	-252.268	674.197	267.482	-225.648	727.595	20.4136	-160.305	742.382	38.5973	-178.784	760.271	-37.0435	-145.224	730.349	-120.733
566	5.65	16.2563	1158.65	85.6866	88.6416	1156.14	129.483	-54.042	1165.4	125.554	185.388	991.468	240.078	-148.389	980.825	247.33	9.56152	957.976	173.637	308.767	694.757	287.302	268.187	727.954	48.0535	202.945	743.827	62.8422	216.378	761.895	-11.7046	202.382	730.294	-100.688	-252.314	674.129	267.458	-225.693	727.595	20.4182	-160.354	742.368	38.6603	-178.808	760.12	-36.8201	-145.253	730.461	-120.877
567	5.66	16.2124	1158.62	85.645	88.5854	1156.13	129.417	-54.067	1165.37	125.582	185.36	991.471	240.081	-148.417	980.825	247.293	9.49378	957.921	173.674	308.749	694.775	287.307	268.328	728.113	47.807	202.902	743.816	62.8377	216.314	761.945	-11.8025	202.3	730.303	-100.741	-252.35	674.099	267.424	-225.741	727.616	20.4345	-160.386	742.365	38.6781	-178.839	759.973	-36.6037	-145.282	730.488	-120.856
568	5.67	16.2068	1158.63	85.5628	88.5451	1156.15	129.296	-54.0764	1165.37	125.534	185.349	991.476	240.046	-148.419	980.833	247.238	9.46944	957.933	173.594	308.723	694.795	287.303	268.064	727.885	48.0853	202.867	743.815	62.8257	216.26	761.96	-11.8679	202.258	730.341	-100.828	-252.349	674.089	267.392	-225.776	727.651	20.3783	-160.409	742.372	38.6504	-178.84	759.96	-36.5953	-145.316	730.448	-120.791
569	5.68	16.2188	1158.69	85.4999	88.5641	1156.17	129.293	-54.0889	1165.39	125.474	185.363	991.467	240.038	-148.389	980.841	247.227	9.4994	957.989	173.563	308.715	694.764	287.275	268.023	727.838	48.1892	202.867	743.864	62.8312	216.242	761.96	-11.8491	202.263	730.411	-100.847	-252.298	674.093	267.421	-225.772	727.684	20.3587	-160.417	742.391	38.6607	-178.851	760.098	-36.783	-145.338	730.448	-120.767
570	5.69	16.2574	1158.71	85.4959	88.6359	1156.17	129.39	-54.0524	1165.4	125.495	185.419	991.421	240.084	-148.312	980.818	247.25	9.57567	957.995	173.598	308.755	694.68	287.267	268.08	727.823	48.2895	202.921	743.888	62.8578	216.33	761.924	-11.7387	202.325	730.421	-100.784	-252.22	674.096	267.483	-225.74	727.68	20.4285	-160.388	742.398	38.6706	-178.854	760.248	-36.977	-145.334	730.412	-120.714
571	5.7	16.3485	1158.67	85.5398	88.7099	1156.16	129.429	-53.9963	1165.38	125.481	185.481	991.349	240.116	-148.232	980.761	247.259	9.67038	957.956	173.611	308.809	694.597	287.25	268.159	727.802	48.3639	202.994	743.852	62.8637	216.429	761.846	-11.6537	202.408	730.384	-100.744	-252.136	674.075	267.527	-225.688	727.644	20.4516	-160.327	742.393	38.6373	-178.832	760.379	-37.1595	-145.303	730.372	-120.693
572	5.71	16.4316	1158.6	85.6443	88.7589	1156.11	129.477	-53.969	1165.35	125.47	185.516	991.282	240.13	-148.196	980.703	247.243	9.75418	957.863	173.68	308.819	694.542	287.237	268.192	727.783	48.3998	203.025	743.785	62.8551	216.492	761.767	-11.6016	202.471	730.322	-100.67	-252.101	674.06	267.542	-225.659	727.603	20.4208	-160.298	742.352	38.6176	-178.806	760.392	-37.1968	-145.253	730.325	-120.69
573	5.72	16.4318	1158.53	85.7246	88.7753	1156.06	129.556	-53.9815	1165.32	125.496	185.525	991.252	240.153	-148.217	980.678	247.251	9.76185	957.744	173.812	308.811	694.544	287.237	268.165	727.77	48.4053	203.006	743.738	62.8586	216.536	761.766	-11.5466	202.468	730.252	-100.598	-252.125	674.049	267.532	-225.661	727.571	20.4438	-160.313	742.313	38.6479	-178.837	760.293	-37.0853	-145.248	730.293	-120.647
574	5.73	16.3576	1158.51	85.733	88.7187	1156.08	129.506	-54.0192	1165.31	125.53	185.492	991.262	240.153	-148.251	980.689	247.267	9.68475	957.672	173.864	308.796	694.58	287.259	268.075	727.783	48.3244	202.955	743.74	62.8621	216.507	761.805	-11.5817	202.405	730.234	-100.603	-252.153	674.042	267.488	-225.686	727.582	20.4528	-160.34	742.306	38.684	-178.888	760.149	-36.9278	-145.274	730.331	-120.676
575	5.74	16.2748	1158.57	85.6607	88.6427	1156.13	129.433	-54.0612	1165.32	125.533	185.438	991.288	240.144	-148.29	980.713	247.26	9.58256	957.702	173.744	308.757	694.608	287.276	267.988	727.791	48.2203	202.904	743.768	62.852	216.414	761.888	-11.6974	202.333	730.276	-100.708	-252.187	674.02	267.435	-225.71	727.624	20.4032	-160.359	742.317	38.6868	-178.925	760.078	-36.8809	-145.302	730.435	-120.795
576	5.75	16.2191	1158.63	85.6109	88.5801	1156.17	129.377	-54.0753	1165.35	125.549	185.414	991.292	240.177	-148.327	980.719	247.248	9.54036	957.713	173.7	308.695	694.612	287.289	267.931	727.796	48.1959	202.872	743.788	62.8409	216.353	761.948	-11.748	202.279	730.326	-100.79	-252.217	673.984	267.418	-225.744	727.655	20.3926	-160.369	742.336	38.6626	-178.936	760.017	-36.7882	-145.34	730.427	-120.759
577	5.76	16.2211	1158.69	85.5828	88.5756	1156.21	129.404	-54.06	1165.38	125.582	185.413	991.288	240.209	-148.317	980.725	247.268	9.56425	957.737	173.657	308.681	694.607	287.303	267.945	727.804	48.2332	202.862	743.806	62.8441	216.318	761.975	-11.78	202.272	730.378	-100.835	-252.204	673.979	267.467	-225.743	727.66	20.4162	-160.365	742.358	38.6684	-178.91	760.028	-36.7463	-145.323	730.482	-120.822
578	5.77	16.2633	1158.78	85.5322	88.6245	1156.24	129.426	-54.0074	1165.44	125.601	185.45	991.298	240.237	-148.259	980.745	247.279	9.62906	957.801	173.578	308.696	694.582	287.304	268.021	727.83	48.2496	202.909	743.855	62.8321	216.297	761.986	-11.8071	202.318	730.446	-100.878	-252.141	674.015	267.525	-225.705	727.686	20.4087	-160.33	742.398	38.6537	-178.849	760.175	-36.8952	-145.292	730.534	-120.867
579	5.78	16.3277	1158.85	85.5384	88.6967	1156.29	129.451	-53.9572	1165.48	125.614	185.494	991.29	240.255	-148.208	980.719	247.291	9.71345	957.854	173.569	308.694	694.536	287.286	268.1	727.858	48.2462	202.963	743.918	62.8019	216.325	761.949	-11.7843	202.396	730.455	-100.849	-252.09	674.019	267.53	-225.681	727.714	20.3844	-160.307	742.421	38.6187	-178.776	760.361	-37.0524	-145.289	730.462	-120.75
580	5.79	16.4177	1158.82	85.6945	88.7408	1156.3	129.531	-53.9406	1165.47	125.689	185.519	991.249	240.246	-148.191	980.678	247.332	9.78041	957.832	173.726	308.691	694.465	287.28	268.157	727.842	48.3523	202.998	743.906	62.8351	216.369	761.898	-11.717	202.459	730.405	-100.721	-252.06	673.997	267.547	-225.662	727.699	20.435	-160.3	742.41	38.6422	-178.734	760.488	-37.1304	-145.281	730.398	-120.677
[truncated: 3 more columns]

## Sheet: Trial01
PathFileType	4	(X/Y/Z)	Trial01.trc
DataRate	CameraRate	NumFrames	NumMarkers	Units	OrigDataRate	OrigDataStartFrame	OrigNumFrames
100	100	738	16	mm	100	1	738
Frame#	Time	nasion			r zyg pr			l zyg pr			r should			l should			sternum			r elbow			r ulna			r radius			r hand			r finger			l elbow			l ulna			l radius			l hand			l finger
		X1	Y1	Z1	X2	Y2	Z2	X3	Y3	Z3	X4	Y4	Z4	X5	Y5	Z5	X6	Y6	Z6	X7	Y7	Z7	X8	Y8	Z8	X9	Y9	Z9	X10	Y10	Z10	X11	Y11	Z11	X12	Y12	Z12	X13	Y13	Z13	X14	Y14	Z14	X15	Y15	Z15	X16	Y16	Z16
1	0	25.4626	1137.16	104.744	93.1907	1149.89	154.517	-49.1318	1149.43	134.642	182.421	997.888	275.188	-135.768	999.878	294.584	10.5937	970.968	195.241	316.711	704.965	265.012	266.262	732.454	23.0652	198.803	744.43	41.6262	212.687	757.227	-34.6855	201.329	731.97	-121.572	-255.202	699.816	292.737	-242.364	728.57	37.1835	-173.728	743.608	51.9348	-201.243	755.106	-20.7777	-192.408	732.008	-108.993
2	0.01	25.4415	1137.21	104.706	93.0851	1149.94	154.351	-49.154	1149.49	134.474	182.384	997.862	275.098	-135.808	999.834	294.518	10.5711	970.971	195.098	316.676	704.984	265.039	266.262	732.433	23.0576	198.702	744.422	41.4938	212.702	757.258	-34.7473	201.327	731.98	-121.603	-255.164	699.773	292.763	-242.36	728.582	37.1474	-173.727	743.596	51.92	-201.253	755.108	-20.7822	-192.423	732.014	-109.027
3	0.02	25.4583	1137.27	104.658	93.0666	1149.98	154.303	-49.0855	1149.57	134.447	182.382	997.867	275.051	-135.794	999.802	294.484	10.6247	971.003	194.996	316.676	704.921	264.999	266.317	732.431	23.1208	198.75	744.429	41.5221	212.72	757.259	-34.7149	201.384	731.999	-121.607	-255.092	699.781	292.86	-242.321	728.607	37.1353	-173.684	743.609	51.9369	-201.236	755.141	-20.7693	-192.394	732.038	-109.028
4	0.03	25.5046	1137.35	104.65	93.0724	1150.03	154.334	-48.9953	1149.61	134.466	182.398	997.89	275.046	-135.76	999.787	294.416	10.702	971.006	194.982	316.709	704.859	264.919	266.37	732.451	23.2058	198.837	744.436	41.5867	212.728	757.242	-34.6974	201.454	732.012	-121.548	-255.009	699.805	292.961	-242.29	728.627	37.1561	-173.628	743.62	51.9499	-201.198	755.208	-20.7908	-192.347	732.059	-109.023
5	0.04	25.5739	1137.43	104.592	93.0433	1150.08	154.305	-48.9114	1149.61	134.434	182.417	997.902	275.008	-135.741	999.771	294.324	10.7699	970.966	194.98	316.761	704.802	264.84	266.408	732.467	23.2312	198.863	744.441	41.5395	212.739	757.222	-34.7186	201.514	732.003	-121.52	-254.93	699.854	293.032	-242.249	728.655	37.1262	-173.575	743.607	51.9473	-201.156	755.257	-20.8162	-192.301	732.056	-109.03
6	0.05	25.6128	1137.49	104.554	93.0176	1150.13	154.282	-48.8317	1149.61	134.42	182.422	997.889	274.949	-135.726	999.736	294.27	10.8196	970.873	194.966	316.788	704.765	264.805	266.415	732.466	23.2025	198.876	744.429	41.4923	212.748	757.212	-34.7393	201.552	731.995	-121.575	-254.881	699.841	293.054	-242.226	728.656	37.0882	-173.538	743.566	51.9502	-201.131	755.287	-20.8609	-192.29	732.055	-109.069
7	0.06	25.619	1137.54	104.531	92.9731	1150.16	154.317	-48.7604	1149.57	134.446	182.422	997.872	274.933	-135.72	999.684	294.228	10.7792	970.769	194.963	316.785	704.769	264.816	266.393	732.436	23.2005	198.847	744.399	41.4823	212.752	757.228	-34.7467	201.53	731.973	-121.591	-254.86	699.773	293.041	-242.234	728.638	37.1217	-173.243	743.206	51.0159	-201.167	755.237	-20.8683	-192.295	732.049	-109.053
8	0.07	25.5966	1137.61	104.523	92.9228	1150.18	154.397	-48.7463	1149.55	134.44	182.39	997.854	274.941	-135.747	999.642	294.19	10.6937	970.69	194.987	316.763	704.813	264.865	266.343	732.409	23.1902	198.756	744.385	41.484	212.733	757.276	-34.7326	201.471	731.942	-121.595	-254.858	699.675	293.006	-242.273	728.618	37.1635	-172.924	742.789	49.8649	-201.24	755.107	-20.8097	-192.348	732.036	-109.015
9	0.08	25.5977	1137.67	104.461	92.8757	1150.21	154.43	-48.7293	1149.51	134.438	182.359	997.827	274.907	-135.776	999.592	294.097	10.6396	970.623	194.983	316.735	704.883	264.907	266.288	732.416	23.1233	198.685	744.374	41.4945	212.716	757.306	-34.7171	201.407	731.918	-121.629	-254.85	699.581	292.924	-242.306	728.589	37.151	-173.467	743.341	51.4311	-201.257	755.144	-20.8089	-192.408	732.019	-109.04
10	0.09	25.6501	1137.75	104.354	92.863	1150.25	154.462	-48.6609	1149.52	134.365	182.368	997.803	274.831	-135.782	999.557	294.012	10.6149	970.579	194.955	316.721	704.915	264.918	266.255	732.461	23.0392	198.665	744.392	41.4632	212.716	757.322	-34.7655	201.376	731.927	-121.701	-254.817	699.516	292.862	-242.322	728.58	37.1419	-173.618	743.493	51.7747	-201.259	755.143	-20.8119	-192.438	732.013	-109.055
11	0.1	25.7278	1137.86	104.245	92.8913	1150.31	154.461	-48.5637	1149.58	134.242	182.404	997.805	274.785	-135.761	999.547	293.977	10.6561	970.62	194.893	316.732	704.914	264.938	266.237	732.523	22.9901	198.728	744.464	41.4992	212.726	757.323	-34.7808	201.381	731.98	-121.734	-254.764	699.518	292.908	-242.306	728.611	37.148	-173.654	743.554	51.8742	-201.232	755.191	-20.8283	-192.447	732.042	-109.046
12	0.11	25.8263	1137.93	104.146	92.9265	1150.34	154.408	-48.4325	1149.64	134.142	182.455	997.81	274.806	-135.725	999.544	293.975	10.7329	970.67	194.84	316.763	704.858	264.91	266.228	732.592	22.961	198.755	744.524	41.4609	213.066	756.868	-35.0208	201.436	732.026	-121.754	-254.699	699.525	292.99	-242.279	728.651	37.1586	-173.622	743.576	51.9265	-201.17	755.258	-20.8426	-192.465	732.062	-109.04
13	0.12	25.9584	1137.94	104.104	93.0041	1150.32	154.397	-48.2904	1149.65	134.086	182.524	997.796	274.815	-135.671	999.527	293.967	10.8306	970.669	194.762	316.794	704.758	264.819	266.265	732.63	22.9701	198.726	744.539	41.3333	213.825	755.836	-35.5618	201.524	732.045	-121.772	-254.634	699.518	293.049	-242.239	728.663	37.1337	-173.567	743.586	51.9425	-201.103	755.326	-20.9024	-192.461	732.063	-109.065
14	0.13	26.0493	1137.87	104.152	93.0975	1150.26	154.475	-48.1685	1149.59	134.111	182.592	997.766	274.837	-135.625	999.48	293.97	10.9026	970.578	194.814	316.868	704.653	264.731	266.313	732.643	23.0099	198.76	744.572	41.3137	214.056	755.495	-35.7049	201.589	732.024	-121.772	-254.583	699.495	293.082	-242.205	728.653	37.1426	-173.518	743.558	51.9786	-201.083	755.343	-20.8758	-192.425	732.05	-109.049
15	0.14	26.0598	1137.72	104.279	93.1102	1150.17	154.505	-48.1493	1149.45	134.175	182.611	997.726	274.858	-135.604	999.436	293.972	10.9075	970.418	195.03	316.949	704.599	264.65	266.312	732.626	23.032	198.738	744.549	41.2989	214.145	755.328	-35.7226	201.586	731.954	-121.741	-254.571	699.45	293.065	-242.2	728.61	37.1541	-173.505	743.485	52.0474	-201.104	755.312	-20.8082	-192.434	732.026	-109.027
16	0.15	26.0403	1137.56	104.433	93.0804	1150.08	154.503	-48.1818	1149.29	134.246	182.583	997.692	274.903	-135.613	999.387	293.974	10.8595	970.292	195.221	316.984	704.571	264.598	266.278	732.6	22.9968	198.683	744.505	41.3127	214.174	755.245	-35.7483	201.558	731.881	-121.707	-254.582	699.379	293.012	-242.225	728.578	37.1681	-173.52	743.423	52.0753	-201.142	755.259	-20.7728	-192.492	731.996	-109.006
17	0.16	26.024	1137.45	104.489	93.0501	1149.98	154.479	-48.1885	1149.18	134.299	182.551	997.666	274.974	-135.63	999.335	293.983	10.8259	970.218	195.314	316.97	704.565	264.598	266.232	732.574	22.9594	198.641	744.505	41.3122	214.192	755.218	-35.7656	201.544	731.824	-121.704	-254.582	699.306	292.944	-242.262	728.558	37.1904	-173.55	743.396	52.0618	-201.187	755.243	-20.7879	-192.541	731.976	-108.953
18	0.17	26.0044	1137.39	104.481	93.0262	1149.94	154.396	-48.1788	1149.14	134.309	182.523	997.648	275.048	-135.629	999.315	293.996	10.8272	970.212	195.366	316.929	704.578	264.65	266.196	732.572	22.9268	198.618	744.529	41.3126	214.204	755.213	-35.7584	201.52	731.809	-121.73	-254.549	699.255	292.943	-242.277	728.547	37.212	-173.574	743.4	52.0535	-201.22	755.241	-20.7699	-192.589	731.992	-108.95
19	0.18	26.0088	1137.45	104.35	93.0242	1149.95	154.303	-48.1405	1149.19	134.252	182.512	997.66	275.119	-135.602	999.338	294.024	10.8738	970.297	195.334	316.875	704.607	264.735	266.172	732.601	22.8805	198.613	744.576	41.2712	214.214	755.25	-35.7594	201.528	731.86	-121.765	-254.492	699.249	293.005	-242.262	728.572	37.2371	-173.583	743.448	52.0201	-201.197	755.265	-20.7506	-192.608	732.037	-108.96
20	0.19	26.0446	1137.58	104.127	93.0702	1149.98	154.229	-48.0785	1149.33	134.065	182.522	997.68	275.159	-135.569	999.375	294.016	10.9306	970.452	195.164	316.811	704.645	264.79	266.17	732.646	22.8433	198.643	744.637	41.2226	214.213	755.297	-35.7677	201.549	731.933	-121.823	-254.423	699.276	293.069	-242.239	728.619	37.2184	-173.576	743.521	51.9446	-201.148	755.334	-20.8002	-192.609	732.106	-109.02
21	0.2	26.1006	1137.69	103.996	93.1295	1150.02	154.202	-48.0051	1149.48	133.933	182.538	997.691	275.202	-135.551	999.405	293.992	11.0044	970.573	195.023	316.774	704.651	264.798	266.188	732.679	22.8195	198.684	744.676	41.2487	214.223	755.319	-35.7594	201.568	731.981	-121.884	-254.379	699.318	293.144	-242.228	728.658	37.2007	-173.577	743.561	51.9087	-201.118	755.357	-20.7885	-192.618	732.15	-109.075
22	0.21	26.153	1137.75	103.996	93.1707	1150.04	154.216	-47.9266	1149.56	133.985	182.559	997.677	275.298	-135.531	999.41	293.998	11.0564	970.566	195.124	316.773	704.575	264.756	266.209	732.687	22.8775	198.691	744.695	41.2741	214.226	755.298	-35.7862	201.6	731.977	-121.855	-254.354	699.303	293.167	-242.223	728.657	37.2484	-173.579	743.553	51.9487	-201.12	755.361	-20.7544	-192.635	732.139	-108.981
23	0.22	26.1999	1137.74	104.093	93.2224	1150	154.28	-47.8842	1149.56	134.072	182.567	997.616	275.377	-135.518	999.368	294.015	11.0441	970.456	195.299	316.793	704.46	264.717	266.233	732.637	22.9513	198.695	744.658	41.3023	214.251	755.266	-35.7891	201.61	731.934	-121.797	-254.371	699.241	293.122	-242.234	728.598	37.2854	-173.566	743.504	52.0091	-201.153	755.338	-20.7359	-192.654	732.074	-108.92
24	0.23	26.2391	1137.67	104.251	93.2718	1149.94	154.359	-47.8606	1149.53	134.203	182.563	997.522	275.413	-135.511	999.306	293.985	11.0381	970.308	195.435	316.795	704.349	264.671	266.243	732.573	22.9753	198.683	744.584	41.3142	214.285	755.195	-35.7646	201.603	731.862	-121.758	-254.416	699.166	293.063	-242.263	728.522	37.2951	-173.565	743.41	52.0717	-201.192	755.274	-20.6913	-192.677	731.99	-108.918
25	0.24	26.2509	1137.62	104.395	93.2928	1149.91	154.406	-47.8346	1149.5	134.362	182.548	997.451	275.424	-135.52	999.28	293.96	11.0106	970.148	195.613	316.797	704.266	264.625	266.229	732.529	22.9981	198.653	744.511	41.3663	214.297	755.134	-35.7478	201.588	731.799	-121.73	-254.464	699.137	293.001	-242.294	728.48	37.2792	-173.583	743.32	52.1257	-201.212	755.233	-20.6775	-192.694	731.936	-108.898
26	0.25	26.275	1137.65	104.467	93.3024	1149.91	154.429	-47.7934	1149.53	134.484	182.54	997.435	275.405	-135.523	999.296	293.899	10.9966	970.074	195.735	316.797	704.232	264.595	266.21	732.519	23.0033	198.624	744.489	41.3724	214.289	755.109	-35.7364	201.567	731.786	-121.734	-254.487	699.182	292.988	-242.31	728.472	37.2689	-173.594	743.289	52.1562	-201.206	755.23	-20.6731	-192.697	731.942	-108.886
27	0.26	26.3394	1137.8	104.381	93.3331	1149.96	154.421	-47.74	1149.68	134.413	182.552	997.44	275.348	-135.513	999.336	293.791	11.0168	970.15	195.679	316.753	704.233	264.61	266.205	732.546	22.9989	198.605	744.517	41.2821	214.291	755.146	-35.7483	201.571	731.824	-121.767	-254.491	699.271	293.023	-242.287	728.512	37.2164	-173.586	743.344	52.0633	-201.195	755.287	-20.7388	-192.676	732	-108.92
28	0.27	26.4063	1138.01	104.218	93.4045	1150.03	154.422	-47.6557	1149.87	134.292	182.556	997.44	275.267	-135.486	999.39	293.769	11.0787	970.306	195.552	316.673	704.222	264.639	266.224	732.588	22.9913	198.623	744.568	41.249	214.283	755.192	-35.7581	201.618	731.895	-121.802	-254.479	699.347	293.099	-242.263	728.587	37.1882	-173.563	743.453	51.9605	-201.12	755.391	-20.83	-192.641	732.079	-108.986
29	0.28	26.4738	1138.21	104.1	93.4803	1150.11	154.429	-47.5901	1150.03	134.226	182.581	997.444	275.243	-135.449	999.429	293.783	11.1332	970.462	195.432	316.601	704.207	264.678	266.226	732.627	22.9987	198.681	744.632	41.2632	214.29	755.255	-35.7601	201.667	731.967	-121.835	-254.48	699.402	293.16	-242.228	728.657	37.2102	-173.542	743.537	51.9517	-201.051	755.466	-20.8592	-192.606	732.132	-109.015
30	0.29	26.5217	1138.36	104.03	93.5366	1150.15	154.44	-47.5549	1150.16	134.131	182.605	997.438	275.227	-135.441	999.449	293.762	11.1595	970.576	195.331	316.536	704.197	264.718	266.215	732.658	22.987	198.706	744.666	41.2375	214.302	755.301	-35.7391	201.698	732.013	-121.854	-254.501	699.428	293.195	-242.218	728.687	37.2027	-173.545	743.576	51.9594	-201.016	755.472	-20.8513	-192.589	732.163	-108.999
31	0.3	26.5319	1138.41	104.068	93.5597	1150.14	154.475	-47.5494	1150.21	134.117	182.589	997.388	275.145	-135.461	999.434	293.743	11.1568	970.572	195.367	316.487	704.165	264.723	266.208	732.646	22.9852	198.684	744.638	41.2369	214.303	755.332	-35.7343	201.675	732.005	-121.865	-254.541	699.389	293.165	-242.249	728.667	37.2049	-173.571	743.558	51.9652	-201.023	755.415	-20.8253	-192.615	732.147	-108.987
32	0.31	26.5084	1138.33	104.291	93.5539	1150.08	154.562	-47.5748	1150.18	134.255	182.557	997.304	275.103	-135.497	999.372	293.723	11.1117	970.432	195.621	316.478	704.101	264.72	266.17	732.598	22.9821	198.624	744.575	41.2823	214.289	755.311	-35.7163	201.62	731.938	-121.857	-254.618	699.313	293.065	-242.309	728.598	37.2497	-173.618	743.482	52.0102	-201.112	755.316	-20.756	-192.665	732.078	-108.948
33	0.32	26.4827	1138.2	104.595	93.5305	1150.01	154.671	-47.6084	1150.12	134.435	182.519	997.214	275.119	-135.533	999.304	293.737	11.0613	970.262	195.917	316.482	704.016	264.714	266.13	732.533	23.013	198.54	744.483	41.3488	214.285	755.264	-35.7249	201.56	731.832	-121.794	-254.69	699.229	292.991	-242.348	728.512	37.3192	-173.67	743.399	52.0769	-201.189	755.219	-20.651	-192.703	731.996	-108.862
34	0.33	26.4996	1138.14	104.735	93.5245	1149.97	154.703	-47.6073	1150.1	134.518	182.497	997.148	275.095	-135.56	999.268	293.734	11.0518	970.194	196.057	316.46	703.935	264.672	266.124	732.508	23.0507	198.48	744.423	41.355	214.279	755.216	-35.7537	201.534	731.787	-121.737	-254.732	699.195	292.953	-242.362	728.462	37.3307	-173.69	743.359	52.0829	-201.229	755.192	-20.6303	-192.707	731.947	-108.843
35	0.34	26.5866	1138.16	104.819	93.5944	1149.95	154.743	-47.5528	1150.13	134.51	182.515	997.121	275.07	-135.556	999.275	293.704	11.0802	970.214	196.034	316.446	703.887	264.629	266.144	732.505	23.0697	198.487	744.411	41.3289	214.28	755.159	-35.7365	201.558	731.772	-121.74	-254.726	699.243	292.983	-242.347	728.479	37.2891	-173.662	743.338	52.0709	-201.221	755.22	-20.6644	-192.677	731.945	-108.858
36	0.35	26.706	1138.26	104.851	93.6992	1150.01	154.805	-47.4659	1150.18	134.522	182.558	997.142	275.046	-135.517	999.308	293.72	11.1369	970.302	196.001	316.445	703.883	264.607	266.184	732.527	23.1004	198.531	744.428	41.3206	214.293	755.101	-35.7114	201.619	731.812	-121.768	-254.68	699.341	293.074	-242.301	728.541	37.2303	-173.596	743.331	52.0715	-201.161	755.303	-20.7625	-192.616	731.983	-108.879
37	0.36	26.8384	1138.4	104.824	93.8077	1150.09	154.817	-47.357	1150.28	134.456	182.592	997.175	275.02	-135.478	999.374	293.72	11.2065	970.438	195.898	316.472	703.907	264.611	266.214	732.579	23.114	198.584	744.477	41.3011	214.307	755.093	-35.7183	201.678	731.891	-121.819	-254.627	699.433	293.098	-242.228	728.605	37.1936	-173.539	743.398	52.038	-201.067	755.402	-20.8289	-192.541	732.049	-108.929
38	0.37	26.9488	1138.53	104.774	93.8984	1150.15	154.833	-47.2763	1150.42	134.324	182.6	997.219	275.011	-135.445	999.42	293.73	11.2493	970.573	195.793	316.461	703.928	264.607	266.243	732.618	23.1096	198.617	744.52	41.2642	214.298	755.124	-35.7129	201.709	731.937	-121.838	-254.589	699.475	293.138	-242.198	728.65	37.1729	-173.514	743.486	51.9974	-201.024	755.475	-20.8683	-192.525	732.106	-108.962
39	0.38	26.9899	1138.61	104.759	93.9198	1150.18	154.861	-47.2566	1150.54	134.207	182.577	997.253	275.041	-135.455	999.425	293.786	11.215	970.646	195.776	316.401	703.976	264.671	266.201	732.624	23.0832	198.59	744.551	41.2415	214.269	755.202	-35.7263	201.68	731.941	-121.828	-254.593	699.466	293.183	-242.228	728.656	37.1864	-173.549	743.533	51.9805	-201.029	755.479	-20.853	-192.569	732.13	-108.967
40	0.39	26.9777	1138.61	104.831	93.8953	1150.15	154.904	-47.2974	1150.56	134.223	182.522	997.247	275.068	-135.492	999.392	293.833	11.1336	970.629	195.884	316.359	704.031	264.709	266.123	732.611	23.0225	198.547	744.55	41.2404	214.25	755.285	-35.7608	201.616	731.92	-121.836	-254.626	699.371	293.117	-242.298	728.63	37.2289	-173.624	743.512	51.99	-201.085	755.395	-20.7711	-192.626	732.119	-108.943
41	0.4	26.9617	1138.57	104.966	93.8928	1150.11	154.963	-47.3387	1150.55	134.304	182.469	997.214	275.106	-135.525	999.326	293.834	11.0353	970.573	196.036	316.358	704.074	264.752	266.077	732.583	22.9794	198.481	744.51	41.2519	214.24	755.339	-35.7668	201.542	731.869	-121.849	-254.652	699.269	293.041	-242.352	728.582	37.2635	-173.698	743.456	51.9978	-201.155	755.281	-20.6989	-192.685	732.086	-108.933
42	0.41	26.9922	1138.49	105.144	93.8982	1150.08	155.019	-47.3306	1150.52	134.368	182.43	997.184	275.128	-135.549	999.282	293.855	10.9815	970.52	196.162	316.356	704.081	264.735	266.059	732.552	22.9804	198.461	744.472	41.2804	214.229	755.351	-35.7764	201.507	731.828	-121.84	-254.657	699.196	293.009	-242.388	728.535	37.3012	-173.735	743.417	51.9939	-201.202	755.204	-20.6784	-192.73	732.037	-108.908
43	0.42	27.0691	1138.47	105.247	93.9326	1150.07	155.061	-47.2704	1150.51	134.418	182.416	997.171	275.16	-135.548	999.262	293.863	11.0006	970.509	196.249	316.388	704.035	264.685	266.092	732.54	23.0197	198.492	744.473	41.2929	214.226	755.3	-35.7922	201.534	731.815	-121.821	-254.644	699.168	293.012	-242.384	728.504	37.3063	-173.726	743.399	52.0629	-201.222	755.211	-20.6838	-192.735	732.006	-108.903
44	0.43	27.1937	1138.5	105.292	94.0424	1150.08	155.115	-47.1441	1150.53	134.462	182.465	997.173	275.206	-135.495	999.271	293.89	11.0989	970.521	196.319	316.453	703.983	264.63	266.175	732.557	23.0596	198.582	744.499	41.3189	214.283	755.217	-35.7662	201.606	731.845	-121.805	-254.598	699.204	293.049	-242.32	728.509	37.3015	-173.649	743.403	52.0929	-201.168	755.292	-20.7039	-192.656	732.016	-108.888
45	0.44	27.3336	1138.55	105.255	94.1731	1150.12	155.165	-46.9711	1150.56	134.543	182.522	997.177	275.265	-135.425	999.285	293.957	11.2366	970.564	196.365	316.505	703.956	264.59	266.249	732.58	23.0917	198.666	744.534	41.2823	214.346	755.145	-35.7233	201.693	731.914	-121.832	-254.528	699.252	293.126	-242.25	728.542	37.2836	-173.552	743.409	52.0597	-201.086	755.373	-20.7604	-192.564	732.045	-108.906
46	0.45	27.4121	1138.6	105.244	94.2665	1150.13	155.23	-46.8566	1150.64	134.571	182.538	997.192	275.308	-135.393	999.29	293.969	11.3303	970.625	196.382	316.52	703.965	264.585	266.287	732.603	23.112	198.701	744.555	41.2692	214.364	755.115	-35.7372	201.736	731.957	-121.85	-254.473	699.296	293.201	-242.203	728.577	37.2499	-173.49	743.424	52.0428	-201.033	755.445	-20.8237	-192.512	732.069	-108.924
47	0.46	27.4026	1138.65	105.301	94.2755	1150.16	155.258	-46.8587	1150.73	134.571	182.508	997.219	275.346	-135.395	999.289	293.987	11.3254	970.69	196.383	316.533	704.016	264.631	266.275	732.614	23.1033	198.696	744.57	41.2822	214.357	755.129	-35.7272	201.727	731.954	-121.832	-254.452	699.292	293.226	-242.202	728.605	37.2487	-173.51	743.471	52.0413	-201.033	755.479	-20.8307	-192.518	732.092	-108.94
48	0.47	27.3317	1138.69	105.358	94.2421	1150.17	155.304	-46.9417	1150.82	134.577	182.463	997.232	275.382	-135.436	999.273	293.986	11.2429	970.713	196.423	316.513	704.098	264.678	266.219	732.607	23.0683	198.645	744.571	41.2966	214.327	755.189	-35.7337	201.67	731.93	-121.81	-254.455	699.218	293.175	-242.24	728.611	37.2756	-173.566	743.49	52.042	-201.087	755.452	-20.7918	-192.57	732.107	-108.926
49	0.48	27.2222	1138.72	105.416	94.184	1150.15	155.334	-47.0561	1150.88	134.586	182.391	997.216	275.397	-135.489	999.223	293.943	11.1317	970.722	196.431	316.455	704.165	264.721	266.147	732.593	23.0154	198.555	744.541	41.294	214.28	755.258	-35.7606	201.58	731.889	-121.828	-254.478	699.084	293.068	-242.315	728.571	37.2983	-173.634	743.461	52.0114	-201.163	755.355	-20.7212	-192.652	732.092	-108.885
50	0.49	27.1466	1138.74	105.504	94.1547	1150.15	155.393	-47.1349	1150.93	134.655	182.35	997.181	275.424	-135.528	999.173	293.92	11.0477	970.701	196.509	316.425	704.174	264.735	266.094	732.571	23.0085	198.498	744.507	41.296	214.263	755.288	-35.7523	201.511	731.833	-121.82	-254.496	698.972	292.996	-242.373	728.523	37.3531	-173.696	743.421	52.0406	-201.235	755.256	-20.6479	-192.707	732.062	-108.887
51	0.5	27.1415	1138.77	105.56	94.1468	1150.17	155.444	-47.1334	1150.97	134.742	182.34	997.152	275.449	-135.541	999.133	293.917	11.0329	970.678	196.579	316.434	704.124	264.711	266.088	732.537	23.034	198.49	744.471	41.3308	214.258	755.251	-35.7545	201.508	731.803	-121.8	-254.494	698.906	292.966	-242.386	728.488	37.3458	-173.715	743.38	52.0674	-201.262	755.214	-20.6169	-192.726	732.006	-108.881
52	0.51	27.1722	1138.84	105.579	94.193	1150.21	155.477	-47.0455	1151.03	134.809	182.375	997.138	275.45	-135.521	999.113	293.883	11.1086	970.674	196.613	316.452	704.042	264.668	266.139	732.519	23.0512	198.522	744.462	41.3218	214.267	755.177	-35.771	201.562	731.804	-121.803	-254.469	698.906	292.959	-242.358	728.47	37.31	-173.679	743.35	52.047	-201.234	755.226	-20.6159	-192.697	731.992	-108.897
53	0.52	27.2223	1138.9	105.623	94.2728	1150.28	155.531	-46.9308	1151.1	134.898	182.427	997.139	275.452	-135.484	999.122	293.879	11.2445	970.664	196.76	316.485	703.965	264.625	266.214	732.534	23.1117	198.573	744.472	41.3045	214.294	755.115	-35.7429	201.618	731.833	-121.799	-254.41	698.979	293.034	-242.298	728.489	37.2905	-173.606	743.332	52.0729	-201.185	755.29	-20.675	-192.632	731.994	-108.916
54	0.53	27.2534	1138.97	105.657	94.345	1150.35	155.604	-46.8472	1151.21	134.94	182.462	997.155	275.449	-135.45	999.153	293.896	11.3509	970.697	196.855	316.478	703.932	264.606	266.264	732.56	23.1793	198.616	744.497	41.3219	214.315	755.07	-35.7231	201.661	731.882	-121.796	-254.38	699.048	293.094	-242.253	728.533	37.2645	-173.546	743.349	52.0982	-201.121	755.37	-20.7333	-192.587	732.011	-108.887
55	0.54	27.2516	1139.08	105.6	94.3554	1150.43	155.583	-46.8285	1151.36	134.902	182.475	997.191	275.443	-135.442	999.175	293.871	11.3744	970.796	196.795	316.429	703.948	264.605	266.248	732.589	23.1428	198.625	744.523	41.2907	214.322	755.078	-35.7268	201.682	731.918	-121.797	-254.366	699.078	293.099	-242.226	728.57	37.2363	-173.52	743.383	52.0736	-201.083	755.425	-20.7731	-192.566	732.04	-108.897
56	0.55	27.205	1139.19	105.567	94.3445	1150.49	155.585	-46.8803	1151.48	134.887	182.477	997.215	275.426	-135.449	999.192	293.856	11.3243	970.89	196.694	316.377	703.998	264.673	266.195	732.598	23.0689	198.63	744.531	41.2984	214.303	755.148	-35.7479	201.658	731.918	-121.83	-254.357	699.094	293.106	-242.229	728.59	37.2161	-173.544	743.426	52.0288	-201.082	755.424	-20.8115	-192.564	732.077	-108.941
57	0.56	27.1122	1139.27	105.611	94.2829	1150.5	155.605	-46.9785	1151.55	134.947	182.463	997.209	275.416	-135.461	999.195	293.882	11.2451	970.902	196.71	316.338	704.061	264.753	266.139	732.597	23.0144	198.588	744.525	41.2949	214.274	755.235	-35.7854	201.613	731.89	-121.856	-254.384	699.053	293.06	-242.26	728.578	37.2371	-173.592	743.449	52.0007	-201.093	755.378	-20.7834	-192.599	732.091	-108.976
58	0.57	27.0217	1139.33	105.683	94.2069	1150.52	155.594	-47.0817	1151.61	135.018	182.448	997.182	275.429	-135.484	999.174	293.903	11.1772	970.909	196.758	316.31	704.083	264.772	266.091	732.594	22.9925	198.528	744.519	41.2465	214.262	755.304	-35.777	201.561	731.874	-121.862	-254.404	698.986	292.985	-242.291	728.577	37.2708	-173.629	743.441	51.9885	-201.118	755.331	-20.7349	-192.641	732.089	-108.976
59	0.58	26.9543	1139.4	105.73	94.1753	1150.55	155.607	-47.1494	1151.7	135.047	182.455	997.155	275.475	-135.476	999.154	293.936	11.1467	970.94	196.753	316.322	704.058	264.785	266.099	732.585	23.025	198.511	744.513	41.2404	214.258	755.324	-35.7511	201.535	731.854	-121.843	-254.394	698.941	292.948	-242.306	728.556	37.2918	-173.637	743.434	52.0044	-201.153	755.304	-20.7135	-192.656	732.062	-108.963
60	0.59	26.923	1139.45	105.769	94.1649	1150.6	155.606	-47.1816	1151.78	135.109	182.48	997.112	275.503	-135.452	999.141	293.978	11.1989	970.939	196.783	316.361	703.952	264.727	266.14	732.574	23.0695	198.536	744.523	41.2737	214.252	755.289	-35.7539	201.557	731.873	-121.828	-254.376	698.961	292.99	-242.301	728.552	37.3	-173.631	743.428	52.0208	-201.178	755.31	-20.6916	-192.643	732.051	-108.922
61	0.6	26.939	1139.51	105.786	94.1951	1150.67	155.572	-47.1345	1151.84	135.214	182.538	997.058	275.523	-135.411	999.144	294.037	11.3033	970.918	196.852	316.378	703.824	264.674	266.209	732.557	23.137	198.591	744.528	41.2883	214.276	755.23	-35.7563	201.63	731.91	-121.838	-254.34	698.998	293.045	-242.271	728.556	37.3107	-173.589	743.413	52.0453	-201.14	755.327	-20.6998	-192.617	732.035	-108.901
62	0.61	26.977	1139.57	105.778	94.2445	1150.71	155.551	-47.0495	1151.87	135.338	182.595	997.026	275.526	-135.372	999.152	294.079	11.4194	970.899	196.848	316.38	703.739	264.649	266.276	732.554	23.1745	198.65	744.539	41.2654	214.327	755.166	-35.7557	201.698	731.934	-121.849	-254.329	699.036	293.083	-242.218	728.558	37.2823	-173.534	743.389	52.0669	-201.074	755.362	-20.7569	-192.566	732.015	-108.905
63	0.62	26.9662	1139.6	105.82	94.2521	1150.72	155.566	-47.0486	1151.88	135.393	182.611	997.004	275.495	-135.362	999.157	294.093	11.4514	970.866	196.85	316.357	703.7	264.605	266.285	732.56	23.1495	198.664	744.531	41.244	214.354	755.122	-35.7491	201.72	731.924	-121.827	-254.349	699.073	293.099	-242.205	728.549	37.2422	-173.52	743.388	52.0647	-201.058	755.378	-20.7741	-192.547	732.011	-108.906
64	0.63	26.8786	1139.63	105.886	94.1992	1150.72	155.557	-47.1429	1151.92	135.415	182.577	997.003	275.547	-135.402	999.152	294.079	11.4024	970.821	196.88	316.309	703.711	264.6	266.244	732.553	23.1252	198.618	744.521	41.2636	214.34	755.144	-35.7578	201.688	731.897	-121.799	-254.402	699.075	293.069	-242.234	728.552	37.2605	-173.554	743.391	52.0842	-201.098	755.365	-20.7466	-192.582	732.026	-108.904
65	0.64	26.7556	1139.67	105.904	94.1199	1150.7	155.557	-47.2677	1151.96	135.461	182.518	997.004	275.59	-135.46	999.145	294.096	11.2784	970.783	196.869	316.25	703.755	264.636	266.173	732.543	23.0952	198.532	744.496	41.2556	214.302	755.196	-35.7465	201.619	731.849	-121.775	-254.459	699.029	293.002	-242.288	728.538	37.2951	-173.62	743.408	52.0753	-201.17	755.316	-20.7	-192.624	732.032	-108.914
66	0.65	26.6336	1139.72	105.861	94.058	1150.68	155.539	-47.3885	1151.98	135.464	182.478	997.001	275.586	-135.523	999.14	294.103	11.1596	970.743	196.848	316.203	703.803	264.713	266.112	732.525	23.0759	198.47	744.466	41.2523	214.273	755.231	-35.7527	201.551	731.805	-121.777	-254.492	698.96	292.943	-242.343	728.518	37.2934	-173.676	743.409	52.0516	-201.23	755.279	-20.6793	-192.662	732.028	-108.92
67	0.66	26.5592	1139.77	105.793	94.0315	1150.66	155.518	-47.4465	1152.03	135.451	182.471	996.994	275.596	-135.544	999.141	294.107	11.0938	970.777	196.784	316.176	703.827	264.759	266.079	732.521	23.0677	198.461	744.459	41.2843	214.257	755.236	-35.7613	201.522	731.814	-121.818	-254.508	698.92	292.918	-242.363	728.527	37.3056	-173.691	743.42	52.0389	-201.233	755.275	-20.6664	-192.677	732.044	-108.93
68	0.67	26.5619	1139.8	105.743	94.0608	1150.65	155.478	-47.4434	1152.1	135.348	182.508	997	275.606	-135.523	999.134	294.125	11.1253	970.819	196.757	316.181	703.803	264.735	266.114	732.516	23.0788	198.493	744.467	41.2911	214.258	755.221	-35.772	201.549	731.84	-121.848	-254.48	698.96	292.973	-242.326	728.55	37.2665	-173.665	743.419	52.0371	-201.185	755.303	-20.7193	-192.647	732.058	-108.942
69	0.68	26.607	1139.78	105.803	94.1149	1150.67	155.44	-47.421	1152.15	135.3	182.562	997.021	275.614	-135.482	999.142	294.156	11.2004	970.847	196.751	316.223	703.755	264.72	266.181	732.525	23.1182	198.563	744.487	41.3225	214.289	755.17	-35.7597	201.608	731.862	-121.842	-254.443	699.02	293.046	-242.28	728.574	37.2107	-173.629	743.442	52.0566	-201.133	755.344	-20.769	-192.593	732.076	-108.93
70	0.69	26.6228	1139.79	105.817	94.1486	1150.69	155.414	-47.412	1152.21	135.275	182.577	997.043	275.625	-135.469	999.153	294.155	11.259	970.897	196.722	316.215	703.697	264.69	266.227	732.549	23.1739	198.584	744.507	41.323	214.296	755.132	-35.7379	201.646	731.894	-121.823	-254.426	699.049	293.09	-242.258	728.582	37.2372	-173.599	743.473	52.0542	-201.106	755.385	-20.7769	-192.573	732.087	-108.892
71	0.7	26.5991	1139.8	105.794	94.1356	1150.7	155.37	-47.468	1152.25	135.241	182.557	997.059	275.633	-135.488	999.144	294.156	11.2749	970.916	196.731	316.167	703.668	264.68	266.219	732.557	23.1822	198.57	744.528	41.2785	214.283	755.129	-35.7565	201.644	731.918	-121.826	-254.427	699.064	293.107	-242.263	728.585	37.2647	-173.608	743.474	52.0639	-201.117	755.402	-20.7752	-192.587	732.073	-108.875
72	0.71	26.5527	1139.78	105.82	94.1144	1150.66	155.376	-47.543	1152.21	135.259	182.527	997.057	275.671	-135.513	999.135	294.176	11.2616	970.888	196.763	316.112	703.685	264.712	266.198	732.549	23.1612	198.561	744.525	41.2681	214.28	755.121	-35.7735	201.638	731.895	-121.813	-254.473	699.049	293.093	-242.277	728.556	37.276	-173.61	743.448	52.0701	-201.141	755.359	-20.7708	-192.612	732.038	-108.882
73	0.72	26.5149	1139.71	105.878	94.091	1150.58	155.4	-47.6346	1152.13	135.319	182.487	997.062	275.668	-135.554	999.122	294.197	11.2119	970.803	196.828	316.066	703.739	264.719	266.182	732.54	23.1392	198.563	744.497	41.2996	214.285	755.139	-35.7547	201.621	731.845	-121.785	-254.531	699.003	293.039	-242.287	728.521	37.2909	-173.611	743.412	52.0746	-201.158	755.3	-20.7616	-192.625	732.012	-108.913
74	0.73	26.4642	1139.67	105.936	94.0514	1150.54	155.401	-47.721	1152.07	135.388	182.456	997.076	275.692	-135.592	999.103	294.206	11.1531	970.756	196.899	316.059	703.805	264.718	266.145	732.533	23.0943	198.518	744.454	41.2955	214.287	755.176	-35.7858	201.585	731.804	-121.77	-254.575	698.97	292.986	-242.296	728.501	37.2899	-173.638	743.392	52.0703	-201.167	755.256	-20.6992	-192.63	731.993	-108.884
75	0.74	26.4218	1139.68	105.944	94.0211	1150.53	155.381	-47.7981	1152.06	135.44	182.445	997.097	275.729	-135.591	999.102	294.229	11.1236	970.789	196.913	316.074	703.878	264.755	266.118	732.541	23.0629	198.498	744.457	41.287	214.279	755.221	-35.789	201.563	731.814	-121.763	-254.572	698.944	292.936	-242.304	728.507	37.2946	-173.641	743.406	52.0856	-201.156	755.261	-20.6768	-192.62	732.012	-108.857
76	0.75	26.404	1139.73	105.876	93.9983	1150.55	155.317	-47.8657	1152.09	135.387	182.441	997.118	275.761	-135.594	999.107	294.237	11.1136	970.853	196.844	316.084	703.925	264.804	266.127	732.56	23.074	198.506	744.493	41.2654	214.269	755.258	-35.8055	201.565	731.86	-121.778	-254.531	698.963	292.981	-242.294	728.548	37.2809	-173.322	743.127	51.083	-201.151	755.263	-20.7083	-192.609	732.05	-108.89
77	0.76	26.3948	1139.78	105.832	94.0113	1150.6	155.272	-47.8912	1152.15	135.291	182.462	997.118	275.79	-135.574	999.105	294.268	11.1541	970.928	196.786	316.14	703.919	264.809	266.16	732.572	23.1044	198.543	744.522	41.2527	214.272	755.24	-35.7926	201.592	731.905	-121.796	-254.464	698.988	293.041	-242.268	728.598	37.2484	-172.922	742.768	49.857	-201.148	755.262	-20.7618	-192.58	732.096	-108.923
78	0.77	26.4199	1139.81	105.816	94.0687	1150.63	155.272	-47.8909	1152.19	135.251	182.517	997.095	275.822	-135.529	999.092	294.3	11.2457	970.95	196.827	316.239	703.854	264.747	266.228	732.561	23.1447	198.588	744.537	41.2416	214.292	755.184	-35.7347	201.636	731.933	-121.809	-254.405	698.994	293.076	-242.234	728.617	37.2316	-173.386	743.328	51.4652	-201.084	755.395	-20.802	-192.543	732.107	-108.916
79	0.78	26.4464	1139.83	105.829	94.112	1150.64	155.28	-47.9128	1152.2	135.293	182.549	997.069	275.857	-135.502	999.071	294.299	11.3071	970.933	196.877	316.328	703.815	264.711	266.284	732.55	23.1899	198.636	744.544	41.275	214.304	755.145	-35.7075	201.673	731.946	-121.813	-254.369	698.976	293.077	-242.206	728.624	37.2231	-173.481	743.444	51.8855	-201.054	755.433	-20.8243	-192.528	732.109	-108.934
80	0.79	26.4017	1139.86	105.828	94.0797	1150.65	155.26	-47.9938	1152.2	135.308	182.522	997.035	275.876	-135.535	999.036	294.269	11.2789	970.915	196.941	316.349	703.778	264.672	266.27	732.535	23.1739	198.624	744.514	41.2935	214.295	755.14	-35.7331	201.652	731.929	-121.797	-254.364	698.923	293.048	-242.229	728.604	37.223	-173.545	743.438	51.9915	-201.086	755.41	-20.805	-192.554	732.085	-108.939
81	0.8	26.3259	1139.87	105.858	94.0139	1150.64	155.304	-48.095	1152.16	135.388	182.467	996.996	275.853	-135.585	998.993	294.304	11.2135	970.878	197.034	316.326	703.752	264.638	266.225	732.514	23.1534	198.576	744.483	41.2911	214.264	755.162	-35.7448	201.601	731.908	-121.795	-254.394	698.847	293.012	-242.287	728.561	37.2587	-173.606	743.398	52.0617	-201.16	755.332	-20.7384	-192.612	732.035	-108.908
82	0.81	26.2565	1139.87	105.918	93.9697	1150.62	155.309	-48.1711	1152.11	135.502	182.424	996.963	275.851	-135.622	998.962	294.328	11.144	970.858	197.091	316.299	703.767	264.684	266.176	732.49	23.1323	198.532	744.448	41.3232	214.259	755.18	-35.7301	201.548	731.858	-121.765	-254.435	698.735	292.933	-242.332	728.503	37.2863	-173.635	743.35	52.1267	-201.213	755.253	-20.6728	-192.652	731.983	-108.84
83	0.82	26.1811	1139.91	105.902	93.9176	1150.62	155.26	-48.2356	1152.1	135.534	182.395	996.958	275.812	-135.65	998.95	294.299	11.0689	970.861	197.074	316.235	703.815	264.709	266.122	732.494	23.0464	198.497	744.422	41.2901	214.242	755.207	-35.7817	201.525	731.816	-121.769	-254.466	698.683	292.878	-242.347	728.467	37.2811	-173.671	743.34	52.103	-201.236	755.203	-20.655	-192.672	731.972	-108.835
84	0.83	26.135	1140.01	105.836	93.9008	1150.67	155.223	-48.3992	1152.3	135.042	182.395	996.996	275.768	-135.657	998.958	294.28	11.0382	970.908	197.028	316.212	703.855	264.729	266.103	732.524	23.0123	198.488	744.43	41.2562	214.228	755.226	-35.8267	201.523	731.82	-121.795	-254.453	698.687	292.862	-242.342	728.483	37.304	-173.675	743.358	52.0667	-201.226	755.229	-20.6978	-192.69	731.993	-108.856
85	0.84	26.1504	1140.11	105.812	93.9287	1150.73	155.249	-48.6487	1152.68	134.008	182.439	997.041	275.749	-135.626	999	294.296	11.0783	970.986	197.001	316.243	703.884	264.776	266.14	732.543	23.0702	198.524	744.468	41.2709	214.233	755.204	-35.7672	201.557	731.863	-121.79	-254.415	698.758	292.919	-242.309	728.537	37.3078	-173.633	743.399	52.0703	-201.174	755.302	-20.7336	-192.646	732.035	-108.884
86	0.85	26.1764	1140.19	105.793	93.9633	1150.8	155.272	-48.684	1152.83	133.738	182.484	997.084	275.746	-135.569	999.042	294.321	11.1202	971.073	196.96	316.272	703.879	264.79	266.186	732.562	23.1226	198.571	744.502	41.2941	214.242	755.177	-35.7374	201.592	731.906	-121.776	-254.366	698.848	293.025	-242.266	728.584	37.2684	-173.57	743.453	52.0719	-201.128	755.381	-20.756	-192.585	732.092	-108.902
87	0.86	26.1797	1140.25	105.805	93.9833	1150.86	155.254	-48.677	1152.92	133.71	182.51	997.099	275.736	-135.533	999.048	294.335	11.1571	971.14	196.924	316.295	703.837	264.737	266.206	732.573	23.1371	198.596	744.511	41.3019	214.249	755.156	-35.7584	201.621	731.946	-121.775	-254.31	698.894	293.117	-242.238	728.614	37.2598	-173.547	743.482	52.0474	-201.095	755.464	-20.8188	-192.547	732.125	-108.92
88	0.87	26.1557	1140.26	105.815	93.9795	1150.88	155.261	-48.6805	1152.95	133.733	182.523	997.088	275.727	-135.508	999.029	294.358	11.1919	971.098	196.979	316.329	703.809	264.697	266.233	732.547	23.1828	198.612	744.494	41.3273	214.264	755.13	-35.7328	201.63	731.936	-121.769	-254.298	698.888	293.131	-242.233	728.61	37.27	-173.533	743.46	52.084	-201.09	755.457	-20.8027	-192.544	732.106	-108.911
89	0.88	26.095	1140.27	105.869	93.9513	1150.85	155.276	-48.631	1152.79	134.277	182.502	997.076	275.69	-135.511	999.007	294.342	11.1624	971.031	197.058	316.345	703.817	264.677	266.235	732.528	23.2042	198.588	744.463	41.3297	214.275	755.129	-35.7329	201.619	731.901	-121.744	-254.315	698.855	293.076	-242.253	728.583	37.2833	-173.534	743.419	52.0929	-201.114	755.391	-20.761	-192.566	732.075	-108.9
90	0.89	26.0019	1140.3	105.872	93.861	1150.83	155.221	-48.5856	1152.56	134.974	182.459	997.073	275.661	-135.566	999	294.318	11.0884	970.991	197.101	316.328	703.847	264.669	266.199	732.516	23.1609	198.538	744.448	41.3422	214.255	755.15	-35.7316	201.584	731.871	-121.734	-254.367	698.803	292.982	-242.286	728.548	37.2983	-173.58	743.387	52.104	-201.157	755.311	-20.6681	-192.623	732.05	-108.899
91	0.9	25.9075	1140.39	105.818	93.78	1150.85	155.161	-48.8481	1152.82	134.252	182.411	997.065	275.639	-135.61	998.983	294.301	11.0149	970.999	197.075	316.286	703.909	264.682	266.168	732.521	23.14	198.516	744.441	41.3501	214.241	755.209	-35.7487	201.547	731.869	-121.749	-254.436	698.758	292.915	-242.317	728.522	37.3154	-173.627	743.366	52.1157	-201.195	755.264	-20.6342	-192.654	732.034	-108.89
92	0.91	25.8455	1140.47	105.796	93.7031	1150.89	155.063	-48.9344	1152.95	134.036	182.372	997.058	275.635	-135.634	998.974	294.312	10.9843	971.04	197.038	316.252	703.953	264.735	266.14	732.537	23.1207	198.519	744.44	41.3667	214.234	755.237	-35.7587	201.535	731.867	-121.745	-254.466	698.745	292.913	-242.33	728.506	37.3366	-173.648	743.374	52.118	-201.194	755.238	-20.6115	-192.671	732.026	-108.894
93	0.92	25.7928	1140.58	105.734	93.6625	1150.96	154.989	-48.9531	1153.04	134.004	182.36	997.081	275.609	-135.641	998.978	294.285	10.9909	971.092	196.97	316.237	703.989	264.751	266.13	732.566	23.1016	198.517	744.46	41.3129	214.227	755.234	-35.7636	201.547	731.877	-121.758	-254.466	698.779	292.94	-242.323	728.523	37.3278	-173.638	743.394	52.1031	-201.17	755.265	-20.6296	-192.678	732.034	-108.904
94	0.93	25.7511	1140.69	105.671	93.6393	1151.05	154.915	-48.9359	1153.14	134.051	182.371	997.103	275.574	-135.627	999	294.248	11.0191	971.143	196.878	316.261	704.009	264.763	266.158	732.585	23.0901	198.539	744.481	41.2667	214.242	755.218	-35.7556	201.569	731.909	-121.782	-254.439	698.828	292.982	-242.294	728.552	37.2882	-173.61	743.434	52.0635	-201.133	755.322	-20.6963	-192.643	732.064	-108.931
95	0.94	25.7154	1140.81	105.639	93.6155	1151.13	154.853	-48.817	1153.13	134.518	182.405	997.127	275.557	-135.599	999.02	294.206	11.0696	971.153	196.868	316.329	704.023	264.756	266.196	732.589	23.1111	198.571	744.49	41.293	214.251	755.201	-35.7158	201.596	731.938	-121.796	-254.407	698.863	293.006	-242.26	728.593	37.2512	-173.578	743.46	52.0276	-201.104	755.398	-20.7987	-192.598	732.109	-108.949
96	0.95	25.6426	1140.91	105.646	93.5477	1151.18	154.802	-48.6223	1152.87	135.626	182.42	997.14	275.555	-135.587	999.011	294.158	11.0755	971.139	196.907	316.386	703.993	264.698	266.208	732.582	23.1365	198.577	744.489	41.3254	214.256	755.168	-35.7271	201.615	731.947	-121.78	-254.386	698.883	293.035	-242.251	728.613	37.2411	-173.57	743.472	51.9877	-201.101	755.435	-20.8108	-192.574	732.125	-108.942
97	0.96	25.535	1140.96	105.682	93.4629	1151.21	154.775	-48.716	1153	135.481	182.417	997.111	275.516	-135.593	998.994	294.126	11.0475	971.078	196.959	316.429	703.954	264.685	266.212	732.551	23.1817	198.587	744.454	41.3936	214.251	755.127	-35.7302	201.599	731.921	-121.734	-254.377	698.852	293.026	-242.265	728.594	37.2623	-173.281	743.124	51.0924	-201.159	755.356	-20.7834	-192.576	732.1	-108.941
98	0.97	25.4292	1141	105.745	93.3658	1151.25	154.726	-48.9883	1153.38	134.573	182.419	997.071	275.478	-135.612	998.96	294.099	11.0197	970.997	196.984	316.454	703.923	264.71	266.213	732.506	23.2132	198.543	744.428	41.3596	214.236	755.132	-35.7407	201.566	731.887	-121.731	-254.391	698.79	292.985	-242.294	728.549	37.2678	-172.913	742.678	49.9761	-201.232	755.214	-20.7292	-192.607	732.049	-108.903
99	0.98	25.308	1141.07	105.783	93.2568	1151.33	154.659	-49.1283	1153.51	134.417	182.408	997.036	275.429	-135.632	998.932	294.068	10.9854	970.952	196.962	316.419	703.898	264.716	266.187	732.49	23.1724	198.49	744.426	41.2937	214.214	755.151	-35.7645	201.54	731.872	-121.763	-254.434	698.763	292.983	-242.325	728.506	37.2533	-173.452	743.204	51.5486	-201.199	755.255	-20.7159	-192.637	732.019	-108.881
100	0.99	25.1654	1141.18	105.79	93.1346	1151.42	154.592	-49.2396	1153.62	134.446	182.387	997.031	275.353	-135.637	998.938	294.051	10.9405	970.945	196.949	316.378	703.9	264.719	266.15	732.508	23.1394	198.476	744.404	41.2991	214.21	755.168	-35.7267	201.525	731.854	-121.747	-254.478	698.76	292.955	-242.349	728.501	37.2893	-173.617	743.327	51.9399	-201.202	755.257	-20.6801	-192.664	732.021	-108.894
101	1	25.0574	1141.3	105.856	93.0512	1151.52	154.563	-49.2996	1153.74	134.571	182.371	997.042	275.295	-135.626	998.958	294.03	10.9263	970.944	196.929	316.35	703.917	264.742	266.149	732.537	23.1179	198.491	744.395	41.3387	214.211	755.183	-35.7004	201.531	731.859	-121.721	-254.501	698.806	292.95	-242.335	728.51	37.2955	-173.642	743.358	52.0624	-201.198	755.255	-20.6739	-192.662	732.014	-108.869
102	1.01	24.9453	1141.46	105.865	93.0003	1151.63	154.553	-49.3649	1153.85	134.706	182.37	997.041	275.219	-135.612	998.977	293.989	10.9675	970.961	196.885	316.303	703.898	264.74	266.164	732.564	23.1335	198.515	744.417	41.3536	214.201	755.177	-35.7111	201.541	731.887	-121.718	-254.525	698.852	292.951	-242.319	728.529	37.2859	-173.625	743.385	52.0797	-201.173	755.296	-20.7081	-192.649	732.029	-108.888
103	1.02	24.7834	1141.7	105.839	92.9162	1151.77	154.521	-49.4296	1154.01	134.832	182.376	997.054	275.185	-135.596	999.013	293.969	10.9845	970.996	196.821	316.278	703.891	264.739	266.153	732.591	23.1503	198.53	744.439	41.3729	214.198	755.193	-35.7387	201.561	731.92	-121.713	-254.532	698.919	292.995	-242.304	728.566	37.2949	-173.622	743.42	52.0878	-201.147	755.331	-20.6669	-192.645	732.057	-108.905
104	1.03	24.6524	1141.93	105.815	92.83	1151.9	154.508	-49.3788	1154.03	135.385	182.387	997.079	275.125	-135.553	999.04	293.962	11.0047	971.013	196.739	316.291	703.909	264.726	266.147	732.597	23.147	198.534	744.454	41.3548	214.2	755.22	-35.7591	201.583	731.956	-121.723	-254.521	698.96	293.021	-242.285	728.599	37.2668	-173.61	743.457	52.086	-201.116	755.372	-20.6654	-192.632	732.097	-108.941
105	1.04	24.5323	1142.13	105.789	92.7477	1151.99	154.519	-49.3332	1154.01	136.039	182.405	997.09	275.066	-135.527	999.054	293.962	11.0092	970.973	196.693	316.32	703.943	264.7	266.156	732.599	23.1368	198.529	744.449	41.3479	214.192	755.229	-35.7075	201.567	731.975	-121.76	-254.502	698.988	293.006	-242.272	728.618	37.2071	-173.589	743.471	52.0203	-201.103	755.408	-20.7446	-192.601	732.109	-108.975
106	1.05	24.388	1142.33	105.846	92.6343	1152.07	154.546	-49.5172	1154.23	135.938	182.408	997.093	275.027	-135.511	999.061	293.946	11.0012	970.892	196.741	316.35	703.958	264.668	266.151	732.608	23.148	198.501	744.432	41.3347	214.184	755.235	-35.7077	201.548	731.964	-121.744	-254.504	699.001	292.995	-242.283	728.609	37.22	-173.59	743.474	51.9851	-201.117	755.406	-20.7539	-192.609	732.109	-108.968
107	1.06	24.2419	1142.5	105.929	92.5136	1152.14	154.556	-49.4664	1154.05	136.962	182.405	997.071	275.003	-135.513	999.032	293.928	10.9723	970.798	196.81	316.401	703.938	264.64	266.143	732.591	23.159	198.48	744.381	41.3777	214.177	755.229	-35.7414	201.531	731.921	-121.712	-254.525	698.965	292.971	-242.306	728.582	37.2639	-173.603	743.437	52.0109	-201.148	755.355	-20.6864	-192.621	732.086	-108.938
108	1.07	24.12	1142.7	106.029	92.4181	1152.22	154.594	-49.5456	1154.08	137.341	182.397	997.036	274.982	-135.511	998.998	293.915	10.9668	970.694	196.905	316.432	703.909	264.64	266.144	732.549	23.1711	198.453	744.34	41.3858	214.167	755.206	-35.734	201.522	731.887	-121.703	-254.537	698.945	292.979	-242.308	728.538	37.2699	-173.603	743.388	52.0511	-201.171	755.317	-20.71	-192.627	732.051	-108.926
109	1.08	24.0323	1142.93	106.094	92.3266	1152.34	154.607	-49.6227	1154.19	137.586	182.389	997.022	274.95	-135.493	999.001	293.945	10.9804	970.639	196.927	316.436	703.896	264.655	266.136	732.528	23.1974	198.453	744.332	41.4055	214.152	755.162	-35.7294	201.514	731.871	-121.7	-254.551	698.933	292.974	-242.324	728.517	37.2467	-173.608	743.338	52.0954	-201.191	755.292	-20.7368	-192.65	732.025	-108.899
110	1.09	23.9519	1143.22	106.082	92.2367	1152.49	154.632	-49.7002	1154.38	137.67	182.371	997.045	274.911	-135.488	999.016	293.955	10.9781	970.661	196.864	316.422	703.913	264.662	266.126	732.547	23.2065	198.458	744.357	41.4131	214.148	755.153	-35.7199	201.523	731.887	-121.696	-254.573	698.987	292.996	-242.327	728.527	37.2574	-173.617	743.363	52.1144	-201.211	755.305	-20.7348	-192.655	732.039	-108.897
111	1.1	23.884	1143.53	106.018	92.1918	1152.69	154.667	-49.8434	1154.74	137.302	182.368	997.072	274.882	-135.474	999.068	293.933	10.9794	970.749	196.706	316.417	703.953	264.672	266.12	732.607	23.1807	198.466	744.409	41.3971	214.145	755.177	-35.7225	201.541	731.931	-121.702	-254.578	699.052	293.026	-242.307	728.571	37.2494	-173.615	743.42	52.1029	-201.187	755.342	-20.7439	-192.651	732.073	-108.913
112	1.11	23.7956	1143.86	105.969	92.1378	1152.93	154.706	-50.1177	1155.29	136.416	182.36	997.121	274.836	-135.448	999.127	293.897	11.0102	970.842	196.558	316.403	704.021	264.7	266.116	732.673	23.1366	198.47	744.447	41.3204	214.132	755.225	-35.7316	201.544	731.99	-121.742	-254.569	699.099	293.053	-242.288	728.62	37.2356	-173.621	743.469	52.0681	-201.144	755.387	-20.7709	-192.641	732.105	-108.934
113	1.12	23.6726	1144.15	106.017	92.0659	1153.14	154.762	-50.25	1155.56	136.31	182.374	997.138	274.822	-135.448	999.138	293.866	11.0358	970.848	196.51	316.399	704.053	264.722	266.104	732.682	23.1103	198.48	744.445	41.3169	214.126	755.247	-35.7198	201.549	731.992	-121.753	-254.578	699.101	293.056	-242.286	728.627	37.243	-173.621	743.478	52.0356	-201.122	755.371	-20.766	-192.646	732.097	-108.94
114	1.13	23.5466	1144.4	106.161	91.9822	1153.34	154.845	-50.3571	1155.74	136.45	182.395	997.109	274.817	-135.432	999.115	293.871	11.0375	970.782	196.579	316.446	704.041	264.715	266.099	732.655	23.1308	198.49	744.426	41.3695	214.136	755.229	-35.7161	201.547	731.96	-121.722	-254.598	699.085	293.049	-242.293	728.583	37.2828	-173.609	743.448	52.1003	-201.121	755.324	-20.6873	-192.646	732.063	-108.909
115	1.14	23.3912	1144.67	106.326	91.8533	1153.55	154.911	-50.4645	1155.94	136.669	182.401	997.078	274.8	-135.423	999.093	293.836	11.0173	970.691	196.64	316.509	704.026	264.685	266.097	732.621	23.1484	198.449	744.39	41.3855	214.147	755.227	-35.7257	201.517	731.917	-121.683	-254.602	699.059	293.024	-242.314	728.556	37.2767	-173.618	743.416	52.1137	-201.145	755.293	-20.6679	-192.661	732.039	-108.904
116	1.15	23.2117	1144.96	106.527	91.7278	1153.76	155.031	-50.5707	1156.15	136.922	182.404	997.057	274.801	-135.424	999.074	293.784	10.9869	970.606	196.734	316.577	704.003	264.65	266.109	732.592	23.1888	198.411	744.356	41.4063	214.143	755.185	-35.6863	201.497	731.87	-121.642	-254.614	699.054	292.999	-242.329	728.543	37.2726	-173.633	743.387	52.1069	-201.183	755.265	-20.6449	-192.671	732.036	-108.904
117	1.16	23.0953	1145.23	106.728	91.668	1153.94	155.239	-50.6342	1156.36	137.2	182.423	997.033	274.795	-135.397	999.074	293.772	11.0145	970.503	196.864	316.635	703.989	264.615	266.14	732.571	23.2434	198.427	744.327	41.4248	214.154	755.13	-35.644	201.491	731.859	-121.625	-254.616	699.077	293.006	-242.329	728.529	37.2719	-173.624	743.356	52.1192	-201.2	755.27	-20.6482	-192.647	732.034	-108.866
118	1.17	23.0262	1145.54	106.806	91.6384	1154.15	155.371	-50.6729	1156.6	137.463	182.447	997.025	274.747	-135.355	999.08	293.76	11.0692	970.478	196.838	316.682	703.966	264.594	266.159	732.569	23.2426	198.464	744.334	41.4549	214.171	755.105	-35.6449	201.52	731.882	-121.637	-254.605	699.109	293.041	-242.307	728.542	37.248	-173.588	743.353	52.1144	-201.173	755.294	-20.7147	-192.622	732.044	-108.879
119	1.18	22.9634	1145.92	106.764	91.6077	1154.39	155.492	-50.6878	1156.84	137.7	182.469	997.03	274.715	-135.328	999.092	293.721	11.1114	970.557	196.689	316.682	703.964	264.591	266.151	732.597	23.2123	198.5	744.364	41.4515	214.157	755.119	-35.6539	201.564	731.919	-121.652	-254.599	699.165	293.072	-242.28	728.565	37.2338	-173.568	743.392	52.0484	-201.135	755.326	-20.7662	-192.602	732.049	-108.914
120	1.19	22.8838	1146.34	106.753	91.5743	1154.63	155.627	-50.7098	1157.1	137.95	182.472	997.058	274.699	-135.312	999.126	293.695	11.1251	970.641	196.589	316.661	704.001	264.628	266.13	732.645	23.1745	198.497	744.391	41.4362	214.148	755.16	-35.6601	201.569	731.967	-121.671	-254.621	699.23	293.105	-242.275	728.602	37.2206	-173.572	743.454	52.0071	-201.129	755.363	-20.7843	-192.601	732.066	-108.919
121	1.2	22.815	1146.75	106.95	91.5582	1154.86	155.807	-50.7344	1157.39	138.197	182.457	997.088	274.682	-135.301	999.167	293.675	11.1294	970.689	196.515	316.641	704.043	264.644	266.11	732.694	23.1381	198.476	744.406	41.44	214.13	755.205	-35.6248	201.557	732.001	-121.704	-254.649	699.263	293.106	-242.276	728.626	37.2322	-173.578	743.47	52.0311	-201.121	755.367	-20.7371	-192.607	732.085	-108.922
122	1.21	22.7505	1147.17	107.212	91.5402	1155.08	156.009	-50.7767	1157.66	138.508	182.446	997.093	274.659	-135.298	999.186	293.63	11.105	970.687	196.501	316.643	704.072	264.635	266.076	732.71	23.0916	198.46	744.416	41.4504	214.1	755.229	-35.6311	201.533	732.007	-121.71	-254.677	699.27	293.072	-242.288	728.622	37.2581	-173.606	743.473	52.0561	-201.134	755.338	-20.6906	-192.636	732.088	-108.934
123	1.22	22.6792	1147.58	107.6	91.5028	1155.28	156.187	-50.8122	1157.92	138.885	182.453	997.064	274.637	-135.283	999.177	293.601	11.0972	970.621	196.571	316.663	704.063	264.637	266.055	732.698	23.0782	198.432	744.4	41.4639	214.096	755.24	-35.66	201.505	731.982	-121.698	-254.704	699.228	293.022	-242.309	728.587	37.288	-173.643	743.451	52.0562	-201.162	755.305	-20.6817	-192.657	732.065	-108.926
124	1.23	22.6383	1147.92	108.051	91.4659	1155.48	156.37	-50.8305	1158.2	139.248	182.487	996.997	274.619	-135.252	999.152	293.577	11.13	970.51	196.672	316.692	704.015	264.637	266.068	732.649	23.1211	198.412	744.371	41.4457	214.095	755.213	-35.6815	201.499	731.93	-121.672	-254.721	699.189	293.006	-242.33	728.541	37.2897	-173.644	743.412	52.0713	-201.174	755.274	-20.6955	-192.65	732.034	-108.906
125	1.24	22.6173	1148.25	108.379	91.4595	1155.7	156.621	-50.8285	1158.48	139.557	182.545	996.945	274.605	-135.221	999.132	293.541	11.1739	970.428	196.737	316.738	703.949	264.649	266.098	732.602	23.1893	198.431	744.334	41.4586	214.089	755.175	-35.691	201.491	731.887	-121.654	-254.718	699.197	293.026	-242.319	728.512	37.2763	-173.627	743.366	52.0984	-201.164	755.247	-20.7051	-192.635	732.012	-108.934
126	1.25	22.6195	1148.64	108.577	91.4663	1155.99	156.921	-50.833	1158.78	139.855	182.602	996.942	274.605	-135.172	999.153	293.496	11.2264	970.404	196.756	316.775	703.911	264.627	266.126	732.589	23.2378	198.452	744.328	41.4867	214.099	755.145	-35.6407	201.505	731.893	-121.625	-254.69	699.244	293.055	-242.296	728.542	37.246	-173.613	743.364	52.0986	-201.159	755.276	-20.7233	-192.605	732.013	-108.934
127	1.26	22.6247	1149.14	108.621	91.4538	1156.33	157.126	-50.8472	1159.11	140.025	182.637	996.964	274.573	-135.132	999.202	293.426	11.2665	970.445	196.693	316.81	703.902	264.593	266.131	732.614	23.2416	198.45	744.351	41.4954	214.096	755.161	-35.6448	201.523	731.935	-121.638	-254.653	699.308	293.065	-242.286	728.591	37.228	-173.605	743.404	52.0683	-201.162	755.327	-20.7518	-192.602	732.065	-108.927
128	1.27	22.6193	1149.72	108.587	91.4284	1156.71	157.306	-50.8262	1159.42	140.221	182.658	996.983	274.534	-135.094	999.264	293.373	11.3125	970.498	196.544	316.793	703.895	264.596	266.123	732.659	23.21	198.453	744.381	41.4826	214.085	755.166	-35.6217	201.547	731.978	-121.641	-254.644	699.381	293.085	-242.273	728.626	37.2076	-173.599	743.462	52.0446	-201.132	755.378	-20.7895	-192.593	732.099	-108.931
129	1.28	22.6217	1150.23	108.691	91.4592	1157.04	157.529	-50.7717	1159.78	140.531	182.672	996.983	274.525	-135.044	999.304	293.354	11.3629	970.5	196.435	316.744	703.874	264.624	266.123	732.69	23.1904	198.478	744.4	41.4755	214.095	755.178	-35.6235	201.578	732.006	-121.643	-254.659	699.446	293.139	-242.263	728.629	37.2146	-173.59	743.468	52.057	-201.088	755.391	-20.7771	-192.574	732.098	-108.927
130	1.29	22.6318	1150.62	109.011	91.4997	1157.28	157.815	-50.7154	1160.1	140.89	182.693	996.95	274.479	-135.003	999.309	293.338	11.3976	970.421	196.36	316.72	703.847	264.625	266.12	732.687	23.191	198.504	744.393	41.5011	214.109	755.189	-35.6456	201.594	731.984	-121.649	-254.699	699.474	293.156	-242.255	728.612	37.2115	-173.576	743.455	52.0681	-201.065	755.376	-20.7675	-192.574	732.075	-108.912
131	1.3	22.6309	1151	109.387	91.4912	1157.47	158.044	-50.7111	1160.39	141.313	182.702	996.92	274.436	-134.984	999.309	293.278	11.3785	970.326	196.278	316.726	703.82	264.618	266.086	732.683	23.1622	198.468	744.364	41.4842	214.103	755.189	-35.6567	201.562	731.948	-121.632	-254.733	699.491	293.148	-242.272	728.6	37.2269	-173.607	743.445	52.0692	-201.097	755.327	-20.7404	-192.598	732.057	-108.921
132	1.31	22.6155	1151.4	109.775	91.4653	1157.66	158.298	-50.7424	1160.66	141.75	182.697	996.905	274.421	-134.974	999.314	293.238	11.3408	970.257	196.228	316.713	703.822	264.632	266.063	732.679	23.1639	198.403	744.331	41.5013	214.09	755.221	-35.648	201.525	731.928	-121.592	-254.775	699.469	293.091	-242.32	728.594	37.2767	-173.355	743.109	51.1549	-201.177	755.241	-20.6854	-192.649	732.061	-108.906
133	1.32	22.6138	1151.75	110.237	91.4535	1157.84	158.551	-50.7495	1160.9	142.098	182.711	996.874	274.401	-134.965	999.304	293.199	11.3157	970.153	196.237	316.709	703.804	264.638	266.046	732.663	23.1756	198.366	744.306	41.5125	214.075	755.224	-35.6073	201.502	731.904	-121.569	-254.805	699.437	293.025	-242.349	728.569	37.3119	-172.997	742.684	49.9583	-201.248	755.135	-20.5908	-192.673	732.044	-108.849
134	1.33	22.6392	1152.06	110.484	91.4834	1158	158.797	-50.7313	1161.14	142.37	182.764	996.834	274.365	-134.93	999.287	293.142	11.337	970.078	196.163	316.758	703.751	264.643	266.056	732.631	23.1821	198.376	744.292	41.5136	214.072	755.205	-35.5781	201.502	731.896	-121.574	-254.808	699.425	292.997	-242.342	728.548	37.2872	-173.496	743.218	51.5357	-201.199	755.204	-20.6363	-192.651	732.027	-108.864
135	1.34	22.6912	1152.35	110.6	91.5388	1158.18	159.054	-50.6914	1161.39	142.594	182.827	996.813	274.333	-134.884	999.275	293.097	11.4057	970.028	196.041	316.818	703.69	264.635	266.1	732.596	23.2237	198.408	744.298	41.5069	214.09	755.188	-35.5743	201.534	731.913	-121.606	-254.781	699.447	293.053	-242.309	728.551	37.2507	-173.599	743.348	51.9145	-201.152	755.266	-20.7093	-192.616	732.025	-108.866
136	1.35	22.7376	1152.67	110.73	91.5801	1158.39	159.305	-50.641	1161.67	142.848	182.883	996.803	274.306	-134.85	999.286	293.081	11.4801	969.988	196.011	316.842	703.655	264.635	266.148	732.592	23.2674	198.452	744.308	41.5545	214.1	755.141	-35.5463	201.558	731.929	-121.596	-254.751	699.512	293.131	-242.291	728.575	37.2501	-173.592	743.406	52.0178	-201.117	755.33	-20.7491	-192.583	732.06	-108.855
137	1.36	22.7472	1153.11	110.796	91.607	1158.63	159.535	-50.5911	1161.99	143.103	182.924	996.812	274.268	-134.819	999.323	293.014	11.5182	969.983	195.896	316.858	703.665	264.61	266.162	732.617	23.2785	198.445	744.325	41.539	214.114	755.128	-35.553	201.574	731.945	-121.593	-254.729	699.585	293.143	-242.269	728.617	37.222	-173.563	743.446	52.0271	-201.093	755.385	-20.7784	-192.564	732.094	-108.889
138	1.37	22.7534	1153.55	110.908	91.6196	1158.86	159.751	-50.5545	1162.27	143.373	182.953	996.818	274.216	-134.815	999.333	292.96	11.5446	969.982	195.8	316.86	703.681	264.601	266.144	732.654	23.2394	198.444	744.343	41.5298	214.104	755.139	-35.5367	201.58	731.961	-121.592	-254.744	699.61	293.115	-242.252	728.647	37.2059	-173.554	743.452	52.0229	-201.092	755.404	-20.801	-192.556	732.116	-108.925
139	1.38	22.757	1153.94	111.213	91.6427	1159.08	160.055	-50.5177	1162.5	143.675	182.96	996.813	274.195	-134.828	999.32	292.938	11.5618	969.921	195.802	316.845	703.675	264.605	266.126	732.669	23.2111	198.45	744.331	41.55	214.088	755.148	-35.5433	201.562	731.959	-121.572	-254.808	699.587	293.078	-242.268	728.638	37.2228	-173.571	743.439	52.0651	-201.111	755.373	-20.7745	-192.572	732.091	-108.898
140	1.39	22.755	1154.28	111.553	91.6618	1159.3	160.304	-50.4962	1162.71	143.97	182.948	996.803	274.177	-134.842	999.293	292.883	11.5418	969.869	195.714	316.835	703.666	264.603	266.085	732.664	23.166	198.449	744.319	41.534	214.081	755.179	-35.6189	201.538	731.938	-121.6	-254.858	699.561	293.061	-242.289	728.6	37.2288	-173.601	743.424	52.0627	-201.126	755.33	-20.762	-192.595	732.054	-108.886
141	1.4	22.7711	1154.61	111.839	91.6496	1159.52	160.48	-50.4879	1162.94	144.237	182.94	996.798	274.129	-134.847	999.275	292.852	11.5219	969.836	195.573	316.826	703.674	264.619	266.041	732.671	23.0961	198.419	744.309	41.47	214.06	755.213	-35.6746	201.516	731.934	-121.642	-254.882	699.528	293.028	-242.307	728.593	37.2092	-173.637	743.425	52.0052	-201.12	755.289	-20.7623	-192.616	732.047	-108.937
142	1.41	22.7953	1154.95	112.185	91.6339	1159.76	160.667	-50.4887	1163.2	144.529	182.956	996.809	274.134	-134.841	999.269	292.842	11.5312	969.816	195.545	316.835	703.687	264.614	266.03	732.678	23.1184	198.383	744.301	41.4879	214.042	755.25	-35.6443	201.485	731.953	-121.638	-254.883	699.498	292.996	-242.318	728.6	37.2244	-173.656	743.434	52.0176	-201.139	755.279	-20.7509	-192.627	732.056	-108.935
143	1.42	22.8184	1155.34	112.468	91.6427	1160.02	160.879	-50.4989	1163.48	144.855	182.98	996.827	274.178	-134.818	999.282	292.866	11.5332	969.818	195.54	316.862	703.685	264.607	266.047	732.68	23.1429	198.351	744.321	41.4937	214.041	755.268	-35.5863	201.466	731.976	-121.629	-254.853	699.489	293.003	-242.323	728.619	37.254	-173.644	743.432	52.0695	-201.151	755.3	-20.7019	-192.636	732.07	-108.903
144	1.43	22.8641	1155.74	112.577	91.6702	1160.25	161.06	-50.486	1163.78	145.069	183.029	996.802	274.158	-134.767	999.274	292.83	11.5893	969.814	195.453	316.895	703.646	264.581	266.087	732.678	23.147	198.391	744.348	41.4886	214.048	755.241	-35.6183	201.504	731.987	-121.624	-254.78	699.502	293.045	-242.291	728.62	37.2341	-173.622	743.438	52.0613	-201.126	755.328	-20.7355	-192.615	732.057	-108.922
145	1.44	22.9165	1156.11	112.639	91.7203	1160.46	161.301	-50.4444	1164.05	145.253	183.091	996.772	274.182	-134.703	999.248	292.82	11.6975	969.764	195.452	316.92	703.609	264.597	266.156	732.646	23.2178	198.463	744.337	41.5287	214.077	755.178	-35.6162	201.561	731.981	-121.612	-254.726	699.519	293.082	-242.247	728.619	37.2	-173.56	743.427	52.0341	-201.07	755.356	-20.8009	-192.556	732.055	-108.924
146	1.45	22.9465	1156.46	112.737	91.7603	1160.67	161.629	-50.4129	1164.29	145.448	183.135	996.765	274.217	-134.677	999.246	292.829	11.7707	969.674	195.55	316.94	703.604	264.633	266.185	732.617	23.2818	198.501	744.325	41.5754	214.092	755.139	-35.5756	201.591	731.975	-121.594	-254.696	699.547	293.122	-242.224	728.626	37.2102	-173.505	743.395	52.0737	-201.03	755.378	-20.8207	-192.521	732.058	-108.9
147	1.46	22.9319	1156.82	112.839	91.7561	1160.91	161.878	-50.4141	1164.53	145.63	183.136	996.778	274.252	-134.677	999.256	292.842	11.756	969.667	195.501	316.939	703.632	264.649	266.16	732.624	23.2605	198.473	744.321	41.5569	214.094	755.152	-35.5863	201.584	731.979	-121.592	-254.665	699.552	293.137	-242.216	728.634	37.221	-173.506	743.389	52.0816	-201.031	755.377	-20.78	-192.526	732.061	-108.905
148	1.47	22.9149	1157.16	112.987	91.7185	1161.16	162.074	-50.4383	1164.75	145.787	183.098	996.787	274.284	-134.708	999.264	292.821	11.7207	969.659	195.442	316.924	703.651	264.638	266.117	732.651	23.209	198.408	744.312	41.5136	214.083	755.184	-35.5777	201.554	731.968	-121.582	-254.668	699.521	293.098	-242.227	728.622	37.2473	-173.542	743.418	52.0524	-201.059	755.365	-20.7401	-192.552	732.057	-108.889
149	1.48	22.9028	1157.49	113.248	91.6765	1161.35	162.291	-50.4624	1164.93	145.96	183.054	996.787	274.355	-134.744	999.268	292.84	11.6691	969.6	195.461	316.898	703.665	264.653	266.066	732.672	23.1574	198.369	744.294	41.5549	214.075	755.216	-35.5669	201.52	731.938	-121.574	-254.696	699.474	293.045	-242.267	728.6	37.272	-173.572	743.415	52.0624	-201.124	755.33	-20.7069	-192.599	732.044	-108.843
150	1.49	22.9181	1157.8	113.566	91.6578	1161.53	162.506	-50.4609	1165.09	146.107	183.014	996.773	274.381	-134.776	999.246	292.869	11.6367	969.567	195.433	316.853	703.651	264.637	266.036	732.68	23.1292	198.348	744.287	41.5513	214.056	755.238	-35.5675	201.487	731.923	-121.595	-254.725	699.449	293.051	-242.3	728.58	37.2786	-173.602	743.392	52.0749	-201.172	755.284	-20.6659	-192.646	732.037	-108.861
151	1.5	22.9863	1158.1	113.818	91.6826	1161.71	162.682	-50.4115	1165.27	146.216	183.01	996.778	274.387	-134.773	999.233	292.877	11.6321	969.588	195.372	316.832	703.62	264.628	266.024	732.683	23.1033	198.351	744.298	41.5007	214.046	755.252	-35.5766	201.488	731.936	-121.61	-254.696	699.441	293.052	-242.304	728.571	37.2792	-173.601	743.392	52.0405	-201.148	755.278	-20.6991	-192.64	732.053	-108.932
152	1.51	23.0995	1158.32	114.126	91.7387	1161.89	162.91	-50.3444	1165.44	146.366	183.034	996.782	274.421	-134.757	999.232	292.91	11.6633	969.614	195.412	316.866	703.604	264.64	266.055	732.677	23.1694	198.38	744.309	41.5271	214.045	755.24	-35.5989	201.511	731.956	-121.6	-254.666	699.455	293.076	-242.279	728.596	37.2628	-173.57	743.398	52.0413	-201.12	755.296	-20.7374	-192.6	732.059	-108.929
153	1.52	23.2163	1158.49	114.382	91.8024	1162.02	163.179	-50.294	1165.6	146.527	183.063	996.781	274.498	-134.733	999.224	292.959	11.7119	969.616	195.561	316.89	703.591	264.615	266.115	732.668	23.2698	198.399	744.324	41.5666	214.053	755.196	-35.5669	201.537	731.972	-121.558	-254.648	699.478	293.113	-242.263	728.63	37.2627	-173.548	743.412	52.0867	-201.117	755.332	-20.7353	-192.589	732.07	-108.905
154	1.53	23.3117	1158.64	114.524	91.8528	1162.14	163.401	-50.2418	1165.71	146.663	183.089	996.769	274.533	-134.714	999.202	292.998	11.7523	969.615	195.654	316.902	703.583	264.619	266.156	732.675	23.2957	198.418	744.336	41.5673	214.071	755.149	-35.5197	201.551	731.976	-121.548	-254.642	699.492	293.134	-242.245	728.649	37.2556	-173.533	743.427	52.0798	-201.105	755.372	-20.7379	-192.587	732.081	-108.914
155	1.54	23.3757	1158.75	114.592	91.9036	1162.24	163.612	-50.1591	1165.8	146.733	183.099	996.768	274.554	-134.715	999.191	293.021	11.7823	969.614	195.677	316.901	703.6	264.635	266.157	732.676	23.2858	198.452	744.328	41.5694	214.077	755.142	-35.5294	201.565	731.969	-121.574	-254.658	699.485	293.139	-242.234	728.636	37.2285	-173.54	743.434	52.0519	-201.073	755.388	-20.7626	-192.568	732.075	-108.921
156	1.55	23.398	1158.81	114.674	91.9254	1162.29	163.798	-50.1097	1165.88	146.809	183.071	996.765	274.571	-134.742	999.181	293.039	11.7442	969.605	195.685	316.882	703.622	264.634	266.111	732.675	23.2566	198.454	744.319	41.5716	214.06	755.167	-35.5369	201.544	731.947	-121.602	-254.702	699.446	293.124	-242.254	728.614	37.2368	-173.562	743.418	52.0345	-201.076	755.354	-20.7731	-192.574	732.071	-108.925
157	1.56	23.4085	1158.86	114.738	91.9129	1162.33	163.987	-50.1063	1165.96	146.904	183.021	996.785	274.618	-134.794	999.174	293.062	11.6567	969.586	195.708	316.844	703.643	264.606	266.043	732.674	23.1664	198.397	744.298	41.5271	214.041	755.208	-35.5801	201.497	731.933	-121.594	-254.772	699.422	293.07	-242.289	728.59	37.2369	-173.6	743.415	52.0393	-201.112	755.31	-20.7621	-192.591	732.066	-108.943
158	1.57	23.4561	1158.92	114.849	91.9203	1162.38	164.188	-50.0828	1166.04	146.981	182.967	996.795	274.645	-134.853	999.171	293.087	11.6111	969.555	195.778	316.817	703.665	264.634	266.033	732.678	23.1579	198.364	744.287	41.5295	214.033	755.207	-35.5803	201.472	731.936	-121.587	-254.814	699.4	293.036	-242.298	728.58	37.2604	-173.615	743.39	52.0757	-201.16	755.296	-20.7527	-192.616	732.057	-108.932
159	1.58	23.5093	1159.03	114.895	91.9625	1162.43	164.382	-50.0423	1166.11	147.081	182.946	996.802	274.678	-134.869	999.182	293.127	11.5798	969.557	195.81	316.811	703.673	264.649	266.031	732.693	23.1872	198.367	744.307	41.5582	214.04	755.202	-35.5665	201.486	731.944	-121.552	-254.822	699.411	293.055	-242.292	728.595	37.2845	-173.62	743.398	52.0953	-201.166	755.326	-20.7325	-192.625	732.067	-108.871
160	1.59	23.5833	1159.14	114.932	92.0178	1162.49	164.505	-49.9853	1166.18	147.125	182.936	996.796	274.681	-134.872	999.176	293.159	11.6087	969.559	195.777	316.814	703.658	264.651	266.039	732.716	23.1923	198.382	744.33	41.5648	214.048	755.206	-35.6006	201.513	731.959	-121.535	-254.811	699.412	293.085	-242.284	728.601	37.2929	-173.623	743.422	52.0901	-201.132	755.345	-20.7174	-192.624	732.069	-108.857
161	1.6	23.6866	1159.25	114.952	92.0857	1162.55	164.598	-49.9064	1166.25	147.092	182.957	996.773	274.666	-134.862	999.155	293.161	11.6674	969.57	195.722	316.818	703.613	264.658	266.088	732.722	23.2174	198.439	744.35	41.5543	214.055	755.199	-35.6088	201.569	731.987	-121.556	-254.782	699.402	293.105	-242.27	728.606	37.2724	-173.586	743.416	52.0682	-201.086	755.35	-20.755	-192.603	732.062	-108.862
162	1.61	23.7699	1159.36	114.945	92.1402	1162.6	164.715	-49.8518	1166.31	147.117	182.963	996.742	274.658	-134.864	999.117	293.163	11.6955	969.57	195.658	316.821	703.583	264.651	266.133	732.708	23.2533	198.471	744.353	41.5375	214.068	755.188	-35.5817	201.592	731.995	-121.573	-254.764	699.395	293.145	-242.241	728.6	37.2469	-173.56	743.396	52.0729	-201.06	755.337	-20.7553	-192.578	732.055	-108.88
163	1.62	23.7915	1159.44	115.054	92.1388	1162.63	164.849	-49.8545	1166.38	147.196	182.932	996.756	274.691	-134.897	999.098	293.161	11.6183	969.547	195.656	316.831	703.576	264.618	266.115	732.69	23.2665	198.423	744.342	41.5376	214.056	755.175	-35.5434	201.561	731.99	-121.544	-254.751	699.38	293.169	-242.264	728.591	37.2719	-173.589	743.408	52.0876	-201.093	755.333	-20.6884	-192.589	732.065	-108.847
164	1.63	23.7781	1159.51	115.203	92.1221	1162.65	164.991	-49.8835	1166.44	147.273	182.871	996.77	274.696	-134.946	999.084	293.155	11.5051	969.496	195.706	316.835	703.583	264.609	266.071	732.687	23.2534	198.378	744.327	41.58	214.031	755.179	-35.553	201.508	731.985	-121.539	-254.779	699.334	293.123	-242.319	728.577	37.3078	-173.632	743.41	52.0787	-201.18	755.322	-20.6368	-192.635	732.07	-108.82
165	1.64	23.7831	1159.57	115.319	92.1046	1162.66	165.102	-49.8993	1166.49	147.311	182.827	996.767	274.642	-135.001	999.066	293.072	11.4298	969.445	195.675	316.815	703.613	264.618	266.043	732.683	23.2391	198.33	744.306	41.5559	214.018	755.188	-35.5516	201.465	731.96	-121.552	-254.816	699.294	293.063	-242.357	728.551	37.2962	-173.664	743.405	52.0596	-201.236	755.297	-20.6477	-192.66	732.04	-108.864
166	1.65	23.8078	1159.63	115.403	92.1019	1162.67	165.177	-49.8826	1166.53	147.332	182.808	996.755	274.601	-135.03	999.051	293.016	11.4179	969.379	195.66	316.782	703.629	264.614	266.03	732.678	23.2145	198.312	744.278	41.5407	214.004	755.189	-35.5687	201.465	731.926	-121.553	-254.836	699.271	293.039	-242.356	728.524	37.2891	-173.668	743.382	52.0631	-201.22	755.273	-20.6733	-192.662	732.019	-108.872
167	1.66	23.8547	1159.7	115.532	92.1386	1162.69	165.267	-49.8658	1166.59	147.353	182.815	996.755	274.563	-135.028	999.055	292.985	11.4382	969.336	195.653	316.768	703.659	264.627	266.02	732.677	23.184	198.336	744.268	41.5652	214.021	755.172	-35.5828	201.503	731.909	-121.575	-254.838	699.272	293.022	-242.332	728.533	37.2786	-173.647	743.371	52.093	-201.192	755.294	-20.7226	-192.649	732.032	-108.88
168	1.67	23.9332	1159.83	115.615	92.2004	1162.78	165.347	-49.8291	1166.67	147.381	182.829	996.771	274.525	-135.016	999.085	292.953	11.4714	969.344	195.607	316.755	703.672	264.631	266.042	732.682	23.1955	198.374	744.284	41.5776	214.046	755.161	-35.5555	201.531	731.938	-121.57	-254.837	699.295	293.026	-242.303	728.567	37.2664	-173.608	743.405	52.0916	-201.165	755.346	-20.7647	-192.618	732.068	-108.899
169	1.68	23.9869	1160	115.607	92.2359	1162.86	165.39	-49.7961	1166.77	147.376	182.824	996.8	274.488	-135.021	999.114	292.907	11.5141	969.378	195.525	316.742	703.655	264.617	266.077	732.71	23.2341	198.396	744.328	41.55	214.056	755.152	-35.5328	201.548	731.978	-121.56	-254.816	699.35	293.07	-242.284	728.603	37.2641	-173.594	743.453	52.0612	-201.126	755.399	-20.7529	-192.599	732.092	-108.909
170	1.69	24.0322	1160.12	115.68	92.254	1162.94	165.462	-49.7842	1166.85	147.428	182.825	996.814	274.488	-135.018	999.134	292.893	11.5352	969.406	195.462	316.757	703.646	264.635	266.077	732.742	23.2399	198.402	744.356	41.5337	214.048	755.17	-35.5467	201.563	731.998	-121.544	-254.793	699.383	293.116	-242.284	728.615	37.2892	-173.597	743.474	52.0852	-201.121	755.416	-20.7447	-192.598	732.097	-108.895
171	1.7	24.0535	1160.19	115.792	92.2695	1162.98	165.507	-49.7808	1166.89	147.458	182.826	996.787	274.475	-135.015	999.135	292.854	11.5263	969.434	195.362	316.778	703.609	264.632	266.076	732.743	23.2151	198.414	744.366	41.5474	214.043	755.194	-35.5782	201.55	732.01	-121.562	-254.778	699.377	293.132	-242.287	728.611	37.3002	-173.61	743.471	52.0771	-201.126	755.396	-20.7503	-192.603	732.093	-108.921
172	1.71	24.0417	1160.24	115.812	92.2557	1162.97	165.52	-49.8029	1166.89	147.498	182.812	996.735	274.416	-135.017	999.099	292.822	11.495	969.401	195.291	316.774	703.572	264.625	266.052	732.714	23.1863	198.404	744.348	41.4993	214.01	755.195	-35.6228	201.523	731.993	-121.585	-254.79	699.332	293.112	-242.301	728.578	37.2878	-173.631	743.446	52.0151	-201.13	755.333	-20.7631	-192.623	732.046	-108.932
173	1.72	24.0185	1160.25	115.911	92.2243	1162.96	165.575	-49.8466	1166.89	147.553	182.798	996.706	274.414	-135.029	999.07	292.804	11.4437	969.322	195.332	316.774	703.566	264.643	266.034	732.673	23.1946	198.359	744.295	41.5132	214.005	755.184	-35.6091	201.5	731.944	-121.575	-254.813	699.275	293.047	-242.322	728.55	37.279	-173.661	743.405	52.0653	-201.163	755.277	-20.7228	-192.644	732.018	-108.926
174	1.73	24.0039	1160.24	116.09	92.198	1162.96	165.646	-49.8643	1166.9	147.638	182.788	996.687	274.439	-135.038	999.08	292.812	11.4047	969.265	195.44	316.779	703.567	264.656	266.033	732.648	23.2353	198.321	744.265	41.579	214.004	755.186	-35.5858	201.459	731.925	-121.55	-254.829	699.274	293.025	-242.342	728.551	37.3005	-173.667	743.372	52.1182	-201.215	755.265	-20.6763	-192.649	732.014	-108.897
175	1.74	24.0207	1160.26	116.147	92.2099	1162.99	165.693	-49.8441	1166.93	147.648	182.801	996.681	274.434	-135.036	999.095	292.776	11.4088	969.232	195.471	316.773	703.57	264.615	266.025	732.658	23.2099	198.321	744.261	41.5655	214.001	755.178	-35.582	201.459	731.923	-121.548	-254.842	699.293	292.985	-242.343	728.549	37.2974	-173.657	743.387	52.1029	-201.238	755.287	-20.6826	-192.654	732.014	-108.873
176	1.75	24.0643	1160.3	116.164	92.2472	1163.03	165.719	-49.8	1166.98	147.639	182.812	996.69	274.38	-135.012	999.128	292.764	11.4413	969.232	195.405	316.764	703.577	264.577	266.031	732.681	23.1731	198.339	744.285	41.5291	214.01	755.163	-35.6074	201.482	731.936	-121.568	-254.838	699.352	292.99	-242.321	728.553	37.2792	-173.64	743.415	52.0633	-201.19	755.321	-20.714	-192.637	732.026	-108.9
177	1.76	24.1074	1160.36	116.137	92.2841	1163.06	165.741	-49.7478	1167.02	147.631	182.842	996.713	274.363	-134.978	999.162	292.773	11.4949	969.278	195.33	316.746	703.571	264.589	266.05	732.722	23.1876	198.378	744.323	41.5276	214.04	755.153	-35.5735	201.507	731.973	-121.56	-254.839	699.417	293.057	-242.28	728.593	37.2637	-173.601	743.436	52.0461	-201.121	755.359	-20.7334	-192.6	732.055	-108.918
178	1.77	24.1394	1160.4	116.063	92.312	1163.08	165.733	-49.6964	1167.06	147.617	182.864	996.733	274.363	-134.947	999.199	292.821	11.5602	969.335	195.201	316.723	703.564	264.617	266.068	732.743	23.2157	198.408	744.351	41.5266	214.045	755.156	-35.5244	201.533	732.006	-121.56	-254.825	699.476	293.125	-242.245	728.638	37.245	-173.56	743.46	52.0313	-201.075	755.388	-20.7678	-192.563	732.087	-108.945
179	1.78	24.1388	1160.44	115.98	92.3237	1163.1	165.715	-49.7045	1167.09	147.566	182.871	996.748	274.365	-134.942	999.22	292.84	11.5635	969.398	195.082	316.718	703.548	264.624	266.071	732.768	23.1998	198.391	744.39	41.48	214.035	755.201	-35.5566	201.539	732.033	-121.568	-254.816	699.491	293.123	-242.248	728.657	37.2354	-173.57	743.49	51.9988	-201.068	755.399	-20.7551	-192.574	732.108	-108.928
180	1.79	24.1118	1160.41	116.017	92.3201	1163.08	165.735	-49.7504	1167.05	147.618	182.858	996.74	274.406	-134.936	999.204	292.863	11.5085	969.381	195.126	316.734	703.515	264.592	266.051	732.77	23.2008	198.367	744.384	41.5141	214.025	755.214	-35.5701	201.505	732.034	-121.544	-254.841	699.473	293.123	-242.285	728.641	37.274	-173.607	743.482	52.0434	-201.111	755.374	-20.7009	-192.618	732.1	-108.888
181	1.8	24.105	1160.28	116.109	92.2798	1163	165.756	-49.7732	1166.94	147.726	182.857	996.686	274.459	-134.926	999.166	292.918	11.4863	969.282	195.257	316.74	703.483	264.583	266.047	732.725	23.2267	198.341	744.341	41.5444	214.018	755.187	-35.5346	201.483	731.982	-121.531	-254.874	699.409	293.035	-242.333	728.604	37.2965	-173.639	743.425	52.0908	-201.165	755.31	-20.6907	-192.653	732.05	-108.856
182	1.81	24.097	1160.14	116.184	92.26	1162.91	165.731	-49.7773	1166.83	147.747	182.881	996.628	274.458	-134.917	999.117	292.929	11.5153	969.152	195.4	316.749	703.459	264.589	266.051	732.656	23.2286	198.339	744.282	41.5906	214.027	755.136	-35.5342	201.483	731.917	-121.54	-254.883	699.37	292.964	-242.338	728.54	37.2878	-173.646	743.37	52.0894	-201.197	755.244	-20.6944	-192.662	731.987	-108.849
183	1.82	24.0896	1160.01	116.247	92.2695	1162.85	165.721	-49.7675	1166.75	147.792	182.901	996.592	274.482	-134.897	999.093	292.981	11.5412	969.078	195.525	316.754	703.434	264.567	266.06	732.625	23.2398	198.346	744.239	41.6086	214.044	755.104	-35.5683	201.473	731.885	-121.541	-254.89	699.361	292.949	-242.346	728.501	37.3021	-173.644	743.334	52.1042	-201.22	755.213	-20.6939	-192.674	731.951	-108.858
184	1.83	24.0866	1159.97	116.2	92.2857	1162.83	165.687	-49.7353	1166.72	147.813	182.916	996.608	274.555	-134.876	999.119	293.038	11.5746	969.069	195.6	316.758	703.45	264.593	266.074	732.63	23.263	198.344	744.257	41.5681	214.04	755.094	-35.5761	201.473	731.903	-121.504	-254.883	699.398	293.008	-242.339	728.536	37.2854	-173.632	743.353	52.1397	-201.222	755.267	-20.6626	-192.657	731.987	-108.847
185	1.84	24.121	1160	116.067	92.3178	1162.85	165.637	-49.6875	1166.75	147.75	182.953	996.666	274.616	-134.83	999.18	293.087	11.623	969.154	195.504	316.768	703.5	264.611	266.082	732.677	23.2554	198.39	744.313	41.5572	214.034	755.1	-35.555	201.502	731.957	-121.504	-254.843	699.463	293.061	-242.286	728.598	37.2641	-173.594	743.416	52.0964	-201.172	755.363	-20.7127	-192.604	732.061	-108.884
186	1.85	24.1472	1160.04	115.872	92.352	1162.88	165.566	-49.6356	1166.81	147.648	182.99	996.72	274.639	-134.786	999.233	293.103	11.6746	969.269	195.322	316.766	703.532	264.623	266.088	732.747	23.2276	198.432	744.367	41.5232	214.036	755.136	-35.5475	201.534	732.018	-121.543	-254.806	699.535	293.097	-242.238	728.646	37.2451	-173.566	743.499	52.0128	-201.09	755.432	-20.8195	-192.554	732.109	-108.929
187	1.86	24.1416	1160.06	115.746	92.3636	1162.89	165.511	-49.6251	1166.83	147.588	182.989	996.746	274.69	-134.774	999.258	293.094	11.6888	969.34	195.179	316.748	703.539	264.631	266.071	732.796	23.1869	198.456	744.412	41.4972	214.038	755.19	-35.5741	201.561	732.057	-121.583	-254.789	699.565	293.119	-242.221	728.662	37.2468	-173.558	743.528	51.9778	-201.036	755.436	-20.8318	-192.547	732.123	-108.955
188	1.87	24.1083	1160	115.723	92.3389	1162.84	165.474	-49.6539	1166.78	147.59	182.984	996.737	274.725	-134.786	999.26	293.089	11.6618	969.337	195.15	316.731	703.558	264.668	266.032	732.795	23.1395	198.438	744.399	41.4851	214.032	755.22	-35.596	201.535	732.046	-121.593	-254.79	699.533	293.117	-242.23	728.652	37.2747	-173.583	743.516	51.9631	-201.052	755.391	-20.7995	-192.574	732.123	-108.948
189	1.88	24.0361	1159.91	115.822	92.2899	1162.76	165.478	-49.7018	1166.71	147.652	182.955	996.705	274.789	-134.805	999.217	293.123	11.6032	969.258	195.256	316.725	703.526	264.657	266.016	732.758	23.1589	198.4	744.358	41.5486	214.017	755.227	-35.5866	201.475	732.008	-121.588	-254.806	699.459	293.073	-242.273	728.612	37.2928	-173.624	743.469	52.0059	-201.128	755.317	-20.7066	-192.624	732.077	-108.892
190	1.89	23.9971	1159.79	116.001	92.2485	1162.7	165.513	-49.7532	1166.64	147.763	182.926	996.655	274.832	-134.827	999.174	293.128	11.5645	969.121	195.454	316.74	703.486	264.618	266.021	732.696	23.2123	198.367	744.308	41.6039	214.016	755.206	-35.5647	201.439	731.964	-121.542	-254.833	699.401	293.024	-242.323	728.561	37.3048	-173.654	743.4	52.0853	-201.225	755.256	-20.6033	-192.685	732.032	-108.868
191	1.9	23.9842	1159.69	116.122	92.2535	1162.67	165.525	-49.757	1166.59	147.837	182.946	996.595	274.836	-134.818	999.141	293.124	11.5649	969.008	195.57	316.76	703.436	264.596	266.046	732.64	23.2355	198.376	744.258	41.6452	214.039	755.139	-35.5516	201.433	731.92	-121.512	-254.821	699.372	293.014	-242.336	728.532	37.2959	-173.649	743.333	52.1524	-201.259	755.233	-20.5916	-192.693	731.99	-108.843
192	1.91	24.0256	1159.7	116.069	92.308	1162.67	165.556	-49.7052	1166.6	147.859	183.009	996.585	274.854	-134.766	999.127	293.164	11.6585	968.948	195.654	316.779	703.404	264.566	266.097	732.63	23.2568	198.421	744.266	41.6585	214.075	755.072	-35.5348	201.465	731.92	-121.515	-254.784	699.398	293.033	-242.304	728.547	37.2812	-173.294	742.979	51.2014	-201.231	755.2	-20.657	-192.648	731.979	-108.865
193	1.92	24.1093	1159.77	116.015	92.3712	1162.72	165.552	-49.6341	1166.65	147.817	183.06	996.601	274.853	-134.705	999.149	293.202	11.7616	968.99	195.6	316.788	703.377	264.58	266.144	732.64	23.3069	198.467	744.294	41.621	214.094	755.063	-35.5392	201.519	731.958	-121.524	-254.749	699.445	293.083	-242.271	728.576	37.2642	-172.865	742.581	50.0166	-201.183	755.174	-20.7275	-192.602	731.992	-108.871
194	1.93	24.1646	1159.87	115.957	92.3988	1162.78	165.516	-49.5859	1166.71	147.766	183.077	996.626	274.841	-134.683	999.185	293.181	11.7993	969.092	195.441	316.763	703.386	264.585	266.148	732.662	23.3051	198.491	744.33	41.5894	214.08	755.075	-35.5492	201.556	731.988	-121.537	-254.727	699.5	293.157	-242.234	728.607	37.2483	-173.349	743.183	51.5574	-201.088	755.326	-20.7611	-192.566	732.024	-108.923
195	1.94	24.1493	1159.99	115.885	92.3939	1162.84	165.495	-49.5876	1166.78	147.712	183.061	996.665	274.816	-134.697	999.228	293.148	11.7716	969.187	195.285	316.739	703.424	264.587	266.12	732.707	23.2534	198.465	744.376	41.5316	214.055	755.134	-35.5476	201.555	732.02	-121.547	-254.714	699.514	293.16	-242.22	728.642	37.2495	-173.499	743.403	51.9198	-201.051	755.37	-20.7416	-192.567	732.075	-108.932
196	1.95	24.1037	1160.06	115.881	92.3534	1162.85	165.499	-49.6438	1166.84	147.704	183.022	996.722	274.82	-134.728	999.269	293.14	11.6828	969.252	195.168	316.717	703.489	264.634	266.063	732.757	23.2076	198.403	744.396	41.4983	214.036	755.224	-35.5506	201.504	732.048	-121.563	-254.725	699.515	293.115	-242.242	728.661	37.258	-173.262	743.153	51.0678	-201.116	755.315	-20.6933	-192.599	732.107	-108.924
197	1.96	24.0641	1160.07	115.957	92.3148	1162.83	165.536	-49.7064	1166.87	147.742	182.977	996.72	274.777	-134.759	999.287	293.144	11.5878	969.235	195.1	316.698	703.536	264.671	266.001	732.788	23.1572	198.353	744.371	41.5141	214.008	755.26	-35.5216	201.433	732.051	-121.572	-254.774	699.504	293.072	-242.287	728.66	37.2691	-172.95	742.761	49.8976	-201.21	755.211	-20.6999	-192.652	732.112	-108.911
198	1.97	24.0706	1160.03	116.062	92.3321	1162.82	165.593	-49.7063	1166.86	147.763	182.964	996.689	274.731	-134.768	999.266	293.088	11.5488	969.163	195.084	316.705	703.523	264.629	265.974	732.76	23.1258	198.339	744.325	41.5482	214.004	755.227	-35.5498	201.399	732.003	-121.593	-254.802	699.462	292.996	-242.315	728.628	37.2654	-173.477	743.273	51.4774	-201.192	755.259	-20.7508	-192.67	732.084	-108.907
199	1.98	24.1345	1160.01	116.186	92.3575	1162.8	165.63	-49.6553	1166.82	147.835	182.98	996.633	274.722	-134.732	999.234	293.095	11.5703	969.043	195.16	316.745	703.488	264.609	265.998	732.699	23.1641	198.349	744.292	41.5714	214.028	755.156	-35.5539	201.428	731.932	-121.561	-254.806	699.439	292.96	-242.305	728.577	37.2749	-173.594	743.364	51.8998	-201.185	755.24	-20.7168	-192.653	732.022	-108.882
200	1.99	24.199	1160.03	116.271	92.3997	1162.81	165.715	-49.5998	1166.8	147.905	183.001	996.599	274.72	-134.705	999.216	293.129	11.6222	968.95	195.22	316.773	703.467	264.622	266.044	732.657	23.2416	198.385	744.29	41.5995	214.037	755.084	-35.5221	201.465	731.921	-121.513	-254.815	699.47	292.991	-242.282	728.579	37.2813	-173.603	743.369	52.0761	-201.174	755.264	-20.6951	-192.631	732.003	-108.871
201	2	24.2939	1160.07	116.3	92.4734	1162.85	165.762	-49.5247	1166.83	147.914	183.035	996.586	274.7	-134.669	999.22	293.143	11.6831	968.93	195.175	316.811	703.439	264.597	266.098	732.644	23.2748	198.433	744.299	41.6217	214.038	755.044	-35.5047	201.509	731.95	-121.49	-254.8	699.531	293.053	-242.254	728.588	37.262	-173.561	743.365	52.1246	-201.15	755.326	-20.7371	-192.6	732.007	-108.89
202	2.01	24.3822	1160.1	116.245	92.5413	1162.89	165.741	-49.443	1166.87	147.826	183.063	996.595	274.671	-134.638	999.241	293.132	11.7286	968.94	195.088	316.836	703.415	264.561	266.15	732.649	23.292	198.465	744.323	41.5696	214.061	755.013	-35.5292	201.546	731.963	-121.508	-254.767	699.588	293.114	-242.239	728.601	37.2369	-173.521	743.367	52.1206	-201.105	755.378	-20.8161	-192.563	732.012	-108.923
203	2.02	24.4129	1160.16	116.185	92.5594	1162.92	165.743	-49.4132	1166.91	147.742	183.057	996.608	274.663	-134.648	999.256	293.115	11.7152	968.959	194.973	316.835	703.429	264.575	266.154	732.672	23.281	198.494	744.347	41.5577	214.072	755.034	-35.5483	201.553	731.969	-121.517	-254.775	699.598	293.131	-242.241	728.618	37.2276	-173.545	743.409	52.0844	-201.088	755.382	-20.815	-192.552	732.035	-108.93
204	2.03	24.3902	1160.18	116.145	92.5434	1162.92	165.74	-49.443	1166.93	147.68	183.009	996.629	274.64	-134.705	999.265	293.082	11.6209	968.987	194.793	316.809	703.471	264.594	266.094	732.694	23.2399	198.464	744.354	41.5438	214.03	755.109	-35.5451	201.514	731.972	-121.53	-254.825	699.566	293.077	-242.257	728.624	37.2084	-173.594	743.446	52.0233	-201.1	755.359	-20.7951	-192.583	732.049	-108.945
205	2.04	24.3522	1160.17	116.088	92.4896	1162.88	165.715	-49.5042	1166.96	147.586	182.937	996.68	274.628	-134.776	999.283	293.042	11.5097	969.033	194.645	316.759	703.556	264.636	266.012	732.726	23.1714	198.377	744.354	41.4998	214	755.204	-35.5582	201.439	731.997	-121.559	-254.865	699.532	293.031	-242.299	728.624	37.2301	-173.651	743.462	51.9768	-201.138	755.312	-20.7432	-192.644	732.077	-108.945
206	2.05	24.3263	1160.14	116.093	92.4484	1162.85	165.673	-49.5451	1166.96	147.595	182.877	996.723	274.657	-134.82	999.288	293.039	11.4273	969.054	194.606	316.727	703.618	264.659	265.966	732.755	23.1305	198.325	744.348	41.5465	213.996	755.256	-35.541	201.384	732.021	-121.584	-254.912	699.502	292.995	-242.344	728.634	37.2692	-173.692	743.475	51.9853	-201.199	755.273	-20.6426	-192.693	732.094	-108.927
207	2.06	24.3286	1160.07	116.12	92.4581	1162.8	165.664	-49.5354	1166.9	147.58	182.853	996.728	274.691	-134.835	999.278	293.076	11.4062	968.997	194.694	316.752	703.616	264.634	265.969	732.753	23.1387	198.307	744.325	41.5639	214.001	755.235	-35.5717	201.383	731.998	-121.563	-254.943	699.501	292.968	-242.351	728.623	37.2755	-173.694	743.45	52.0247	-201.226	755.267	-20.6417	-192.693	732.081	-108.912
208	2.07	24.4074	1159.98	116.144	92.5101	1162.76	165.675	-49.4704	1166.83	147.544	182.888	996.708	274.706	-134.812	999.256	293.093	11.457	968.902	194.791	316.78	703.588	264.627	266.031	732.704	23.1965	198.343	744.324	41.5583	214.02	755.165	-35.5802	201.437	731.971	-121.537	-254.93	699.527	292.987	-242.327	728.594	37.2573	-173.65	743.412	52.0416	-201.193	755.277	-20.6964	-192.647	732.053	-108.903
209	2.08	24.4956	1159.92	116.097	92.5769	1162.75	165.655	-49.3788	1166.78	147.517	182.93	996.691	274.722	-134.759	999.243	293.129	11.5449	968.856	194.841	316.797	703.565	264.632	266.098	732.678	23.2382	198.426	744.332	41.5879	214.036	755.09	-35.5669	201.497	731.97	-121.516	-254.881	699.552	293.068	-242.294	728.589	37.2409	-173.58	743.386	52.0888	-201.143	755.329	-20.7419	-192.583	732.027	-108.897
210	2.09	24.5456	1159.9	116.031	92.6221	1162.75	165.638	-49.3153	1166.75	147.481	182.961	996.692	274.752	-134.714	999.229	293.152	11.5916	968.859	194.84	316.825	703.543	264.621	266.151	732.68	23.2973	198.474	744.357	41.594	214.06	755.052	-35.5398	201.54	731.995	-121.514	-254.85	699.582	293.139	-242.254	728.615	37.2625	-173.537	743.384	52.1339	-201.101	755.372	-20.7379	-192.536	732.031	-108.887
211	2.1	24.5524	1159.88	115.908	92.6269	1162.73	165.614	-49.3162	1166.74	147.415	182.964	996.696	274.775	-134.702	999.22	293.177	11.593	968.88	194.789	316.826	703.522	264.62	266.157	732.69	23.2968	198.481	744.385	41.5499	214.076	755.055	-35.5318	201.554	732.018	-121.526	-254.84	699.584	293.148	-242.241	728.633	37.246	-173.536	743.41	52.1053	-201.086	755.392	-20.7386	-192.541	732.045	-108.909
212	2.11	24.5106	1159.82	115.828	92.5727	1162.69	165.556	-49.3657	1166.7	147.368	182.932	996.705	274.801	-134.725	999.232	293.17	11.5518	968.895	194.711	316.792	703.526	264.588	266.125	732.7	23.2622	198.458	744.386	41.5381	214.049	755.085	-35.5452	201.531	732.014	-121.527	-254.849	699.55	293.123	-242.259	728.624	37.2411	-173.569	743.43	52.0878	-201.101	755.373	-20.7489	-192.588	732.054	-108.913
213	2.12	24.4213	1159.77	115.832	92.5067	1162.64	165.523	-49.4441	1166.64	147.391	182.878	996.722	274.856	-134.782	999.227	293.18	11.4784	968.898	194.698	316.76	703.561	264.603	266.067	732.717	23.213	198.414	744.366	41.5865	214.021	755.158	-35.5788	201.492	731.976	-121.518	-254.867	699.497	293.085	-242.288	728.604	37.2828	-173.621	743.428	52.1029	-201.155	755.314	-20.7115	-192.635	732.037	-108.854
214	2.13	24.3133	1159.72	115.852	92.436	1162.6	165.481	-49.5199	1166.6	147.406	182.823	996.735	274.873	-134.83	999.225	293.186	11.4101	968.893	194.702	316.735	703.612	264.631	266.009	732.733	23.147	198.349	744.339	41.5725	214.008	755.183	-35.5693	201.438	731.961	-121.523	-254.889	699.438	293.026	-242.33	728.587	37.3015	-173.664	743.414	52.0774	-201.21	755.245	-20.6547	-192.682	732.033	-108.858
215	2.14	24.2423	1159.71	115.798	92.3874	1162.58	165.417	-49.5671	1166.6	147.358	182.789	996.75	274.882	-134.863	999.238	293.172	11.3681	968.909	194.666	316.711	703.638	264.643	265.984	732.726	23.1375	198.331	744.325	41.5458	213.993	755.182	-35.5547	201.414	731.977	-121.561	-254.899	699.405	292.959	-242.35	728.589	37.2713	-173.683	743.432	52.0118	-201.245	755.237	-20.6803	-192.718	732.048	-108.888
216	2.15	24.2413	1159.75	115.797	92.3834	1162.62	165.436	-49.5645	1166.64	147.337	182.788	996.771	274.909	-134.851	999.269	293.186	11.3877	968.922	194.665	316.71	703.636	264.645	265.993	732.727	23.163	198.344	744.354	41.5438	213.995	755.175	-35.5304	201.43	731.983	-121.544	-254.872	699.448	292.98	-242.337	728.607	37.2638	-173.67	743.448	52.0311	-201.238	755.3	-20.7233	-192.693	732.075	-108.876
217	2.16	24.2968	1159.8	115.787	92.4165	1162.67	165.453	-49.5054	1166.68	147.338	182.823	996.788	274.931	-134.789	999.289	293.233	11.459	968.903	194.696	316.741	703.635	264.646	266.046	732.726	23.2222	198.397	744.375	41.5862	214.014	755.13	-35.5009	201.479	731.997	-121.53	-254.828	699.51	293.057	-242.296	728.63	37.266	-173.618	743.466	52.045	-201.192	755.363	-20.7159	-192.635	732.099	-108.917
218	2.17	24.3536	1159.85	115.729	92.4628	1162.7	165.437	-49.4558	1166.72	147.326	182.876	996.778	274.903	-134.73	999.269	293.223	11.5357	968.872	194.666	316.769	703.615	264.633	266.108	732.726	23.2376	198.467	744.393	41.5818	214.035	755.045	-35.5171	201.539	732.001	-121.54	-254.777	699.546	293.093	-242.249	728.643	37.2156	-173.256	743.138	51.0983	-201.139	755.327	-20.7811	-192.573	732.098	-108.95
219	2.18	24.3758	1159.9	115.767	92.4879	1162.73	165.463	-49.4476	1166.73	147.326	182.907	996.75	274.871	-134.684	999.248	293.221	11.5822	968.834	194.69	316.784	703.589	264.616	266.155	732.704	23.2675	198.504	744.381	41.5769	214.052	754.996	-35.5394	201.565	731.993	-121.526	-254.743	699.547	293.11	-242.239	728.63	37.2079	-172.84	742.705	49.9586	-201.161	755.242	-20.8403	-192.552	732.071	-108.952
220	2.19	24.3294	1159.93	115.925	92.4523	1162.76	165.579	-49.5074	1166.72	147.419	182.893	996.743	274.893	-134.669	999.242	293.289	11.5729	968.789	194.784	316.799	703.584	264.603	266.144	732.674	23.3056	198.463	744.36	41.6032	214.06	754.996	-35.5148	201.541	731.973	-121.501	-254.762	699.519	293.112	-242.258	728.606	37.2614	-173.359	743.209	51.6054	-201.146	755.344	-20.7777	-192.571	732.047	-108.914
221	2.2	24.2397	1159.98	116.069	92.3741	1162.77	165.651	-49.6141	1166.72	147.529	182.846	996.752	274.871	-134.671	999.236	293.288	11.4981	968.759	194.81	316.79	703.598	264.55	266.071	732.659	23.2548	198.386	744.361	41.6174	214.027	755.035	-35.5191	201.493	731.936	-121.49	-254.789	699.492	293.086	-242.298	728.576	37.2864	-173.554	743.327	52.0313	-201.213	755.306	-20.6855	-192.617	732.021	-108.858
222	2.21	24.1466	1160.1	116.104	92.2943	1162.83	165.633	-49.7073	1166.76	147.607	182.815	996.784	274.83	-134.658	999.255	293.26	11.4488	968.766	194.738	316.762	703.69	264.522	266	732.676	23.1707	198.326	744.416	41.62	214.008	755.104	-35.6	201.451	731.91	-121.505	-254.818	699.464	293.015	-242.331	728.563	37.2858	-173.639	743.36	52.0834	-201.256	755.255	-20.6116	-192.677	732.008	-108.846
223	2.22	24.1126	1160.23	116.174	92.2863	1162.91	165.697	-49.7474	1166.84	147.697	182.802	996.849	274.799	-134.589	999.324	293.271	11.4505	968.794	194.681	316.718	703.896	264.509	265.949	732.698	23.1053	198.287	744.564	41.5691	214.02	755.149	-35.6851	201.454	731.913	-121.541	-254.838	699.492	292.971	-242.336	728.575	37.3025	-173.655	743.378	52.0827	-201.255	755.236	-20.6103	-192.704	732.021	-108.872
224	2.23	24.1189	1160.4	116.222	92.3256	1163.05	165.784	-49.7676	1166.95	147.761	182.778	996.934	274.761	-134.466	999.433	293.268	11.5212	968.817	194.598	316.674	704.194	264.485	265.914	732.715	23.0068	198.312	744.899	41.4923	214.03	755.169	-35.7531	201.492	731.929	-121.612	-254.847	699.614	293.002	-242.323	728.613	37.2902	-173.65	743.429	52.0618	-201.207	755.274	-20.6825	-192.686	732.042	-108.894
225	2.24	24.1283	1160.58	116.192	92.3639	1163.22	165.825	-49.7454	1167.08	147.762	182.707	997.045	274.712	-134.321	999.555	293.235	11.6572	968.866	194.465	316.74	704.592	264.421	265.925	732.684	22.863	198.438	745.468	41.3261	214.037	755.221	-35.8627	201.562	731.959	-121.684	-254.843	699.799	293.057	-242.277	728.672	37.2343	-173.625	743.505	51.9819	-201.139	755.337	-20.7505	-192.646	732.078	-108.936
226	2.25	24.1516	1160.75	116.286	92.4227	1163.39	165.888	-49.6916	1167.21	147.849	182.577	997.154	274.698	-134.181	999.649	293.21	11.7901	968.852	194.404	317.042	705.116	264.263	265.976	732.635	22.703	198.699	746.237	41.1076	214.049	755.361	-35.9755	201.65	731.968	-121.737	-254.833	699.973	293.051	-242.23	728.726	37.2064	-173.585	743.542	51.9973	-201.09	755.403	-20.8014	-192.603	732.109	-108.979
227	2.26	24.1618	1160.91	116.477	92.4613	1163.54	166.011	-49.6584	1167.35	148.059	182.371	997.276	274.789	-134.07	999.724	293.209	11.8886	968.752	194.503	317.615	705.714	263.91	266.137	732.48	22.1771	199.065	747.053	40.9636	214.364	755.926	-36.4746	201.734	731.954	-121.795	-254.849	700.142	293.016	-242.221	728.75	37.1906	-173.552	743.537	52.0047	-201.09	755.438	-20.8264	-192.585	732.112	-109.014
228	2.27	24.1333	1161.14	116.62	92.4482	1163.68	166.11	-49.6752	1167.52	148.291	182.086	997.371	274.941	-134.009	999.784	293.219	11.8865	968.681	194.431	318.399	706.391	263.536	266.369	732.166	21.2195	199.471	748.013	40.7856	215.103	756.994	-37.4152	201.841	731.895	-121.899	-254.889	700.261	292.949	-242.242	728.743	37.1757	-173.578	743.516	52.0007	-201.136	755.4	-20.8178	-192.604	732.082	-109.021
229	2.28	24.0646	1161.43	116.674	92.4004	1163.82	166.177	-49.732	1167.73	148.467	181.811	997.44	275.143	-133.989	999.837	293.182	11.8034	968.646	194.285	319.382	707.187	263.169	266.427	731.895	20.726	199.952	749.333	40.4582	215.529	757.763	-37.6892	201.948	731.8	-122.069	-254.922	700.308	292.829	-242.307	728.721	37.1714	-173.629	743.522	51.9584	-201.203	755.347	-20.8081	-192.651	732.053	-109.032
230	2.29	23.9774	1161.75	116.741	92.3494	1163.98	166.281	-49.7737	1167.95	148.694	181.563	997.482	275.409	-133.97	999.886	293.153	11.7114	968.605	194.223	320.521	708.096	262.691	266.458	731.75	20.3184	200.491	750.831	40.0529	216.015	758.724	-37.9617	202.04	731.681	-122.237	-254.939	700.337	292.769	-242.363	728.692	37.1981	-173.689	743.515	51.9422	-201.275	755.286	-20.7612	-192.68	732.019	-109.032
231	2.3	23.92	1162.08	116.799	92.3118	1164.16	166.355	-49.7755	1168.21	148.878	181.296	997.532	275.706	-133.912	999.955	293.148	11.6342	968.62	194.103	321.681	708.991	262.049	266.457	731.793	19.9301	201.159	752.71	39.5827	216.591	759.923	-38.1481	202.157	731.54	-122.381	-254.95	700.402	292.728	-242.378	728.677	37.2002	-173.715	743.523	51.9196	-201.313	755.264	-20.7417	-192.684	732.008	-109.05
232	2.31	23.8966	1162.44	116.771	92.2958	1164.38	166.466	-49.7517	1168.47	148.999	181	997.657	276.096	-133.805	1000.05	293.177	11.5845	968.695	193.924	322.882	710.012	261.423	266.418	732.028	19.6125	201.858	755.064	39.1179	217.28	761.474	-38.3427	202.338	731.433	-122.565	-254.927	700.542	292.71	-242.358	728.699	37.1876	-173.709	743.571	51.8783	-201.29	755.277	-20.749	-192.662	732.013	-109.031
233	2.32	23.9229	1162.82	116.693	92.2819	1164.64	166.52	-49.7293	1168.75	149.087	180.686	997.836	276.505	-133.661	1000.18	293.181	11.5902	968.78	193.77	324.042	711.124	260.759	266.439	732.569	19.195	202.719	757.731	38.4903	218.172	763.376	-38.6304	202.741	731.25	-122.658	-254.895	700.749	292.691	-242.31	728.754	37.1567	-173.671	743.642	51.842	-201.221	755.328	-20.7889	-192.619	732.046	-109.083
234	2.33	23.9519	1163.22	116.672	92.299	1164.91	166.554	-49.6938	1169	149.234	180.414	998.052	276.854	-133.481	1000.32	293.228	11.6333	968.833	193.639	325.123	712.162	259.901	266.289	733.455	18.4334	203.649	761.013	37.9594	219.176	765.842	-39.1818	203.47	731.13	-122.566	-254.853	701.018	292.698	-242.259	728.796	37.135	-173.629	743.702	51.8251	-201.161	755.391	-20.8458	-192.563	732.064	-109.06
235	2.34	23.9541	1163.62	116.774	92.3174	1165.18	166.635	-49.6822	1169.21	149.423	180.19	998.304	277.174	-133.291	1000.43	293.289	11.6856	968.832	193.467	326.118	713.223	258.835	265.66	734.557	17.6217	204.389	764.962	37.3618	220.13	768.88	-39.7156	204.141	731.82	-122.4	-254.812	701.327	292.791	-242.226	728.804	37.1255	-173.599	743.738	51.8167	-201.141	755.429	-20.8762	-192.523	732.085	-109.037
236	2.35	23.9466	1163.98	117.07	92.304	1165.45	166.725	-49.7154	1169.4	149.651	179.992	998.557	277.421	-133.081	1000.54	293.333	11.7419	968.782	193.351	327.064	714.279	257.618	264.731	736.216	16.8566	204.996	769.393	36.9399	220.815	772.456	-40.3363	204.329	733.662	-122.188	-254.78	701.614	292.882	-242.216	728.797	37.1354	-173.597	743.728	51.8008	-201.137	755.411	-20.8632	-192.508	732.078	-109.03
237	2.36	23.8855	1164.29	117.419	92.2669	1165.69	166.786	-49.7958	1169.57	149.963	179.823	998.798	277.634	-132.871	1000.66	293.382	11.7903	968.698	193.319	327.857	715.32	256.307	263.661	738.911	16.1387	205.314	774.249	36.6934	221.136	776.652	-40.8997	203.702	736.644	-121.829	-254.797	701.841	292.876	-242.241	728.784	37.1517	-173.619	743.698	51.8201	-201.176	755.366	-20.8578	-192.553	732.054	-109.019
238	2.37	23.7863	1164.59	117.667	92.2363	1165.93	166.817	-49.8886	1169.74	150.278	179.688	999.027	277.844	-132.651	1000.81	293.469	11.8441	968.633	193.295	328.62	716.267	254.703	262.544	742.617	15.2773	205.397	779.346	36.625	220.891	781.55	-41.3763	201.837	740.926	-121.412	-254.813	702.049	292.871	-242.288	728.776	37.1561	-173.666	743.679	51.869	-201.264	755.302	-20.7854	-192.623	732.037	-108.996
239	2.38	23.7295	1164.88	117.939	92.2412	1166.18	166.926	-49.9466	1169.91	150.563	179.609	999.243	278.026	-132.371	1000.97	293.571	11.9394	968.621	193.209	329.259	717.063	252.803	261.272	746.971	14.3135	205.166	784.798	36.7094	220.169	787.046	-41.6563	198.716	746.644	-121.189	-254.789	702.271	292.892	-242.316	728.776	37.1646	-173.702	743.693	51.8621	-201.35	755.268	-20.7543	-192.684	732.012	-108.986
240	2.39	23.6884	1165.23	118.115	92.2833	1166.44	167.023	-49.9511	1170.07	150.818	179.571	999.447	278.182	-132.063	1001.16	293.648	12.0835	968.671	193.115	330.085	717.308	249.797	259.824	751.772	13.4736	204.776	790.565	36.9659	218.962	793.151	-41.8222	194.602	753.813	-121.242	-254.721	702.516	292.941	-242.329	728.789	37.1746	-173.712	743.707	51.8253	-201.39	755.265	-20.7398	-192.714	731.987	-108.971
241	2.4	23.6742	1165.62	118.233	92.3517	1166.71	167.144	-49.8935	1170.26	151.044	179.549	999.658	278.372	-131.779	1001.33	293.688	12.2745	968.793	193.056	331.191	717.261	245.797	258.134	756.974	12.3433	204.258	796.67	37.3235	217.417	799.829	-41.9133	189.868	762.257	-121.273	-254.643	702.8	293.007	-242.331	728.82	37.1662	-173.724	743.762	51.7913	-201.395	755.309	-20.7785	-192.719	732.012	-108.991
242	2.41	23.6928	1166.01	118.274	92.4447	1166.98	167.29	-49.7829	1170.44	151.322	179.51	999.872	278.594	-131.535	1001.5	293.739	12.4945	968.978	192.955	331.546	718.834	244.394	256.063	762.362	11.1108	203.774	803.255	37.6761	215.651	806.912	-41.9347	184.751	771.76	-121.013	-254.549	703.077	293.089	-242.299	728.873	37.1433	-173.693	743.83	51.7659	-201.363	755.37	-20.8475	-192.698	732.055	-109.026
243	2.42	23.7504	1166.33	118.278	92.5497	1167.22	167.457	-49.6432	1170.63	151.645	179.445	1000.08	278.858	-131.309	1001.66	293.784	12.707	969.119	192.939	331.677	720.954	243.535	253.554	767.918	9.87411	203.432	810.315	38.1328	213.548	814.347	-41.8008	178.93	782.119	-119.937	-254.469	703.329	293.14	-242.263	728.908	37.1203	-173.656	743.87	51.7373	-201.316	755.395	-20.8638	-192.664	732.073	-109.051
244	2.43	23.7647	1166.56	118.37	92.6184	1167.4	167.665	-49.5406	1170.79	152.017	179.286	1000.28	279.19	-131.138	1001.8	293.811	12.8524	969.205	193.068	331.553	722.286	241.489	250.723	773.689	8.51136	203.222	817.823	38.5883	211.234	821.992	-41.324	172.373	793.208	-118.213	-254.426	703.518	293.155	-242.251	728.918	37.1139	-173.666	743.899	51.7067	-201.313	755.385	-20.8708	-192.652	732.07	-109.046
245	2.44	23.7752	1166.73	118.576	92.6758	1167.56	167.895	-49.489	1170.91	152.386	179.031	1000.5	279.623	-131.02	1001.9	293.848	12.9125	969.251	193.256	331.262	721.957	237.087	247.644	779.731	7.10187	203.113	825.743	38.7601	209.091	830.244	-41.617	166.281	804.805	-117.274	-254.403	703.635	293.12	-242.283	728.926	37.1256	-173.693	743.915	51.6722	-201.352	755.359	-20.8285	-192.684	732.073	-109.051
246	2.45	23.859	1166.85	118.953	92.7792	1167.69	168.186	-49.4018	1171.05	152.751	178.763	1000.77	280.12	-130.873	1001.98	293.937	12.9974	969.262	193.528	331.291	722.486	233.152	244.276	786.046	5.8086	203.018	833.869	39.0785	207.003	839.206	-42.7366	160.105	817.058	-116.781	-254.37	703.71	293.062	-242.284	728.917	37.1426	-173.694	743.894	51.6783	-201.375	755.323	-20.7899	-192.699	732.037	-109.063
247	2.46	24.0565	1166.96	119.533	92.9345	1167.79	168.476	-49.2567	1171.2	153.031	178.543	1001.05	280.646	-130.712	1002.06	294.038	13.1021	969.261	193.755	331.335	723.286	229.158	240.271	792.118	5.34957	203.039	842.081	39.7632	204.084	847.911	-42.4103	153.618	829.311	-114.895	-254.315	703.798	293.059	-242.248	728.899	37.1355	-173.679	743.879	51.6245	-201.362	755.305	-20.8101	-192.687	731.999	-109.083
248	2.47	24.3192	1167.09	120.106	93.1747	1167.87	168.873	-49.0741	1171.38	153.272	178.363	1001.32	281.208	-130.571	1002.12	294.147	13.219	969.325	193.937	332.077	724.026	223.279	236.063	798.452	4.84842	202.998	850.359	40.3554	200.954	856.633	-41.5169	147.126	841.588	-112.188	-254.247	703.94	293.118	-242.207	728.915	37.1339	-173.64	743.864	51.6389	-201.331	755.323	-20.8111	-192.661	731.99	-109.098
249	2.48	24.5927	1167.28	120.521	93.4716	1167.98	169.346	-48.8114	1171.59	153.638	178.204	1001.58	281.791	-130.416	1002.2	294.322	13.3508	969.444	194.1	333.525	725.161	216.311	233.666	807.037	1.60544	203.007	858.745	41.061	198	865.161	-40.3571	140.858	854.249	-109.687	-254.183	704.102	293.182	-242.166	728.958	37.1198	-173.593	743.874	51.6713	-201.284	755.367	-20.8222	-192.646	732.001	-109.1
250	2.49	24.867	1167.53	120.764	93.7859	1168.1	169.804	-48.489	1171.8	154.057	178.054	1001.87	282.33	-130.255	1002.27	294.536	13.4803	969.576	194.189	332.843	727.328	213.726	230.068	814.661	0.03082	202.953	867.04	41.7281	195.228	873.254	-38.9935	134.769	867.232	-107.373	-254.111	704.262	293.259	-242.128	728.987	37.0997	-173.543	743.88	51.6596	-201.234	755.382	-20.857	-192.625	731.994	-109.091
251	2.5	25.1866	1167.78	121.076	94.0935	1168.21	170.27	-48.1589	1171.99	154.527	177.855	1002.2	282.861	-130.139	1002.36	294.764	13.5744	969.695	194.264	331.814	728.561	209.941	226.022	822.174	-0.95821	202.817	875.321	42.1098	192.008	881.926	-37.8191	128.652	880.049	-104.257	-254.066	704.387	293.288	-242.11	729.006	37.0731	-173.515	743.891	51.6685	-201.236	755.388	-20.8807	-192.629	731.987	-109.091
252	2.51	25.5496	1167.99	121.637	94.3715	1168.3	170.76	-47.874	1172.16	154.9	177.559	1002.57	283.45	-130.056	1002.44	295.001	13.6203	969.782	194.444	331.446	730.347	204.974	221.863	829.74	-1.84174	202.612	883.217	42.6429	188.519	890.78	-36.6501	122.575	892.66	-100.658	-254.074	704.484	293.293	-242.127	729.008	37.0735	-173.521	743.9	51.6626	-201.281	755.373	-20.8341	-192.651	731.99	-109.119
253	2.52	25.8935	1168.18	122.245	94.6018	1168.37	171.249	-47.6348	1172.33	155.178	177.198	1002.91	284.005	-130.005	1002.52	295.249	13.6203	969.841	194.636	331.137	732.464	199.77	217.456	837.047	-1.77568	201.735	890.424	43.6628	184.796	899.859	-35.1166	116.479	905.065	-96.6431	-254.107	704.565	293.302	-242.168	729.023	37.0743	-173.566	743.906	51.6118	-201.345	755.333	-20.8028	-192.709	731.997	-109.099
254	2.53	26.2204	1168.39	122.58	94.8465	1168.45	171.74	-47.3795	1172.51	155.436	176.808	1003.21	284.521	-129.973	1002.61	295.5	13.6057	969.948	194.789	330.962	734.785	194.379	212.758	844.267	-0.78222	200.74	897.556	44.7528	181.081	909.127	-33.2496	110.411	917.275	-92.2896	-254.116	704.622	293.29	-242.207	729.055	37.0612	-173.612	743.941	51.5307	-201.389	755.326	-20.8225	-192.76	732.021	-109.127
255	2.54	26.554	1168.62	122.736	95.1381	1168.56	172.302	-47.0586	1172.74	155.767	176.448	1003.53	285.042	-129.919	1002.68	295.79	13.6049	970.096	194.848	330.702	737.298	188.972	208.365	851.808	-0.79811	199.679	904.766	45.6977	177.305	918	-31.5977	104.481	929.204	-87.4441	-254.089	704.703	293.347	-242.211	729.091	37.0725	-173.617	743.992	51.5239	-201.371	755.348	-20.8399	-192.767	732.051	-109.139
256	2.55	26.9264	1168.82	123.041	95.4608	1168.68	172.884	-46.6865	1172.94	156.178	176.145	1003.83	285.478	-129.861	1002.73	296.02	13.6297	970.225	194.913	330.434	739.989	183.527	204.116	859.298	-0.85985	198.674	911.774	46.6703	173.585	926.607	-29.8837	98.6878	940.784	-82.2852	-254.045	704.76	293.387	-242.18	729.118	37.0797	-173.585	744.006	51.5113	-201.319	755.351	-20.8635	-192.744	732.067	-109.148
257	2.56	27.3428	1168.98	123.654	95.7599	1168.77	173.431	-46.316	1173.12	156.562	175.861	1004.13	285.843	-129.804	1002.76	296.295	13.6648	970.329	195.049	330.204	742.823	177.957	199.933	866.682	-0.85307	197.688	918.597	47.3436	169.918	934.931	-28.0778	93.0577	952.11	-76.7937	-253.993	704.8	293.433	-242.137	729.111	37.0956	-173.537	743.987	51.522	-201.267	755.363	-20.8846	-192.711	732.064	-109.138
258	2.57	27.7377	1169.13	124.322	96.013	1168.88	174.032	-45.9969	1173.28	156.814	175.537	1004.45	286.208	-129.745	1002.77	296.616	13.6775	970.414	195.272	329.898	745.769	172.385	195.722	873.987	-0.7038	196.634	925.199	48.0522	166.192	943.071	-26.0548	87.6608	963.143	-70.9481	-253.928	704.847	293.529	-242.088	729.102	37.1351	-173.482	743.961	51.569	-201.241	755.369	-20.832	-192.678	732.055	-109.071
259	2.58	28.0713	1169.24	124.896	96.2544	1168.96	174.658	-45.7618	1173.36	157.083	175.168	1004.74	286.512	-129.695	1002.76	296.939	13.6484	970.423	195.635	329.546	748.817	167.112	191.388	881.085	-0.34362	195.714	931.549	48.2178	162.128	950.819	-24.1707	82.5708	973.747	-64.8819	-253.889	704.869	293.578	-242.081	729.064	37.1578	-173.482	743.919	51.6662	-201.283	755.36	-20.7575	-192.682	732.011	-108.985
260	2.59	28.2988	1169.34	125.319	96.449	1169.05	175.242	-45.5806	1173.41	157.417	174.784	1005.01	286.713	-129.68	1002.75	297.188	13.5824	970.428	195.943	329.116	752.053	161.881	187.026	887.944	0.10904	194.831	937.636	47.6661	157.722	958.119	-22.2956	77.6354	983.758	-58.2993	-253.886	704.863	293.577	-242.11	729.035	37.1741	-173.521	743.88	51.7301	-201.361	755.351	-20.7684	-192.731	731.962	-108.946
261	2.6	28.4917	1169.5	125.639	96.5977	1169.16	175.697	-45.4297	1173.48	157.757	174.394	1005.32	286.852	-129.683	1002.77	297.417	13.4993	970.518	196.102	328.611	755.563	156.148	182.706	894.663	0.76186	193.243	943.559	48.8192	153.825	965.595	-20.0532	72.8303	993.014	-50.7371	-253.896	704.854	293.55	-242.148	729.013	37.189	-173.565	743.893	51.7278	-201.422	755.344	-20.764	-192.794	731.953	-108.956
262	2.61	28.6749	1169.69	125.993	96.7178	1169.3	176.076	-45.2838	1173.62	158.075	173.984	1005.7	286.989	-129.672	1002.82	297.611	13.4176	970.651	196.179	328.056	758.893	150.293	178.479	901.291	1.62971	191.459	949.393	50.6241	150.123	972.993	-17.7064	68.6338	1002.37	-44.4184	-253.89	704.872	293.535	-242.163	729.015	37.2074	-173.588	743.914	51.7024	-201.455	755.321	-20.7549	-192.814	731.957	-108.99
263	2.62	28.815	1169.89	126.379	96.8148	1169.45	176.475	-45.1603	1173.76	158.426	173.547	1006.08	287.124	-129.658	1002.86	297.803	13.376	970.77	196.392	327.462	762.207	144.563	174.335	907.739	2.56801	189.618	955.191	52.4414	146.569	980.153	-15.3478	64.986	1011.76	-39.0767	-253.889	704.935	293.535	-242.173	729.033	37.1906	-173.61	743.958	51.659	-201.444	755.296	-20.7325	-192.824	731.984	-109.015
264	2.63	28.9271	1170.13	126.687	96.8531	1169.63	176.789	-45.0826	1173.95	158.753	173.119	1006.44	287.25	-129.65	1002.93	298.014	13.5375	970.856	197.478	326.686	765.703	139.476	170.288	914.043	3.60299	187.737	960.834	54.2587	142.941	986.794	-12.4716	61.6745	1021.04	-33.9571	-253.887	704.995	293.543	-242.183	729.083	37.1933	-173.617	744.032	51.5869	-201.437	755.331	-20.7455	-192.851	732.049	-109.025
265	2.64	28.9856	1170.38	126.933	96.8761	1169.81	177.019	-45.0467	1174.14	159.052	172.706	1006.79	287.357	-129.642	1002.99	298.218	13.5665	970.929	198.09	325.723	769.172	134.707	166.327	920.225	4.71627	185.852	966.204	56.2906	139.096	992.836	-8.73497	58.3044	1029.04	-26.6026	-253.856	705.038	293.581	-242.171	729.134	37.18	-173.604	744.086	51.5102	-201.433	755.375	-20.7272	-192.866	732.112	-109.035
266	2.65	28.9799	1170.59	127.198	96.897	1169.99	177.275	-45.0386	1174.29	159.282	172.307	1007.12	287.482	-129.627	1003.02	298.407	12.996	971.123	196.277	324.713	772.571	130.039	162.515	926.062	6.24179	184.087	971.434	58.1442	135.616	999.005	-5.48134	55.3458	1037.03	-20.175	-253.827	705.098	293.65	-242.15	729.149	37.1902	-173.31	743.763	50.6512	-201.46	755.333	-20.6871	-192.874	732.134	-109.027
267	2.66	28.9458	1170.78	127.437	96.9093	1170.11	177.498	-45.0564	1174.38	159.533	171.94	1007.44	287.561	-129.607	1003.04	298.579	12.7427	971.662	195.62	323.673	775.899	125.569	158.818	931.588	7.97457	182.504	976.558	59.5813	132.427	1004.95	-2.45465	52.5662	1044.88	-14.3463	-253.827	705.137	293.671	-242.148	729.131	37.2067	-172.941	743.338	49.5815	-201.497	755.245	-20.6613	-192.862	732.103	-109.007
268	2.67	28.882	1170.9	127.621	96.9071	1170.19	177.66	-45.0996	1174.43	159.767	171.563	1007.72	287.581	-129.591	1003.04	298.712	12.5729	972.318	195.251	322.576	779.197	121.158	155.167	936.83	9.72023	181.063	981.081	60.2319	129.328	1010.65	0.63753	49.9226	1052.37	-8.89324	-253.835	705.152	293.671	-242.135	729.081	37.2313	-173.402	743.855	51.1239	-201.426	755.332	-20.7071	-192.847	732.06	-108.988
269	2.68	28.7543	1170.95	127.821	96.8483	1170.23	177.821	-45.2195	1174.47	159.996	171.147	1008.04	287.686	-129.614	1003.06	298.834	12.4637	971.761	195.651	321.388	782.37	117.092	151.633	941.726	11.7791	179.955	985.097	59.4414	126.274	1016.08	3.78396	47.7242	1058.73	-2.1253	-253.857	705.156	293.673	-242.155	729.027	37.231	-173.527	743.943	51.5517	-201.456	755.337	-20.7338	-192.859	731.998	-108.962
270	2.69	28.5744	1171.02	128.068	96.6894	1170.28	177.913	-45.4106	1174.51	160.248	170.745	1008.45	287.906	-129.69	1003.08	298.927	12.1522	971.584	195.464	320.115	785.409	113.344	148.17	946.436	13.866	178.45	989.121	60.2726	123.273	1021.05	6.89857	45.449	1064.87	3.93212	-253.917	705.165	293.671	-242.204	728.987	37.262	-173.615	743.949	51.6462	-201.536	755.313	-20.6737	-192.893	731.95	-108.906
271	2.7	28.3725	1171.14	128.195	96.4981	1170.36	177.911	-45.6122	1174.57	160.468	170.433	1008.8	287.953	-129.771	1003.12	299.007	12.2258	971.735	196.065	318.772	788.37	109.798	144.837	950.973	15.9589	176.89	993.022	61.5671	120.437	1025.8	9.84477	43.3023	1070.61	9.8687	-253.985	705.194	293.657	-242.227	728.974	37.2783	-173.656	743.956	51.6827	-201.588	755.307	-20.6427	-192.924	731.944	-108.879
272	2.71	28.1664	1171.31	128.16	96.2976	1170.51	177.832	-45.7886	1174.67	160.619	170.07	1008.97	287.754	-129.823	1003.2	299.075	11.9788	971.584	195.69	317.438	791.183	106.198	141.738	955.274	18.1717	175.357	996.816	63.0095	117.69	1030.28	12.9409	41.2469	1075.92	15.5184	-254.015	705.249	293.675	-242.21	728.997	37.2567	-173.648	743.993	51.6672	-201.561	755.329	-20.6788	-192.913	731.962	-108.909
273	2.72	27.9133	1171.51	128.009	96.0792	1170.7	177.73	-45.9864	1174.81	160.653	169.766	1009.26	287.562	-129.822	1003.38	299.35	11.5252	971.328	194.716	316.104	793.957	102.896	138.759	959.378	20.3536	173.827	1000.33	64.5039	115.031	1034.54	15.9248	39.265	1080.86	20.8604	-254.051	705.314	293.721	-242.219	729.049	37.2439	-173.662	744.055	51.5954	-201.526	755.354	-20.69	-192.913	732.008	-108.955
274	2.73	27.6561	1171.69	127.914	95.8528	1170.89	177.608	-46.1995	1174.94	160.653	169.478	1009.6	287.465	-129.863	1003.49	299.432	11.2249	971.875	194.265	314.741	796.58	99.7868	135.919	963.283	22.5805	172.297	1003.61	66.0166	112.519	1038.56	18.775	37.3529	1085.4	26.1336	-254.096	705.381	293.761	-242.23	729.122	37.2176	-173.679	744.126	51.5266	-201.516	755.404	-20.7259	-192.922	732.097	-108.997
275	2.74	27.4007	1171.82	127.878	95.6414	1171.05	177.548	-46.409	1175.01	160.684	169.397	1009.82	286.722	-130.039	1003.25	298.792	10.4942	972.495	192.779	313.373	799.048	96.9746	133.177	966.833	24.7783	170.833	1006.64	67.633	110.137	1042.24	21.8405	35.5046	1089.42	31.3652	-254.116	705.411	293.746	-242.233	729.152	37.1921	-173.677	744.157	51.4775	-201.504	755.429	-20.7682	-192.936	732.147	-109.008
276	2.75	27.1322	1171.86	127.935	95.4432	1171.13	177.534	-46.6438	1175.03	160.761	169.76	1010	285.088	-130.133	1003.18	298.613	10.2345	972.271	192.503	312.054	801.318	94.471	130.602	970.016	27.1766	169.421	1009.37	69.2917	107.903	1045.63	24.8232	33.719	1092.86	36.7079	-254.16	705.384	293.714	-242.243	729.124	37.1936	-173.415	743.816	50.597	-201.561	755.349	-20.7413	-192.936	732.114	-109.011
277	2.76	26.8666	1171.83	128.084	95.2277	1171.18	177.547	-46.9092	1174.99	160.894	169.177	1010.47	285.792	-130.239	1003.15	298.55	10.5551	971.78	193.786	310.788	803.466	92.066	128.144	972.894	29.7711	168.076	1011.85	71.0346	105.861	1048.72	27.9187	32.3076	1096.13	42.0996	-254.231	705.341	293.671	-242.281	729.067	37.2398	-173.102	743.345	49.5763	-201.651	755.217	-20.597	-192.959	732.046	-108.974
278	2.77	26.649	1171.77	128.221	95.0432	1171.2	177.572	-47.15	1174.89	161.006	168.496	1010.91	286.742	-130.307	1003.22	298.654	10.811	971.494	194.865	309.671	805.497	89.5006	125.842	975.52	32.3742	166.802	1014.07	72.916	103.967	1051.15	31.8001	31.1633	1099.21	47.0948	-254.319	705.3	293.581	-242.292	728.998	37.2706	-173.564	743.821	51.166	-201.619	755.277	-20.6144	-192.953	731.976	-108.925
279	2.78	26.4353	1171.73	128.263	94.8725	1171.22	177.553	-47.3363	1174.8	161.09	167.931	1010.96	287.088	-130.336	1003.3	298.829	10.8688	971.354	195.304	308.507	807.345	86.4498	123.76	977.899	35.0152	165.629	1016.09	74.8511	102.265	1053.25	35.681	30.2274	1101.98	51.146	-254.397	705.285	293.496	-242.28	728.95	37.2268	-173.664	743.891	51.5835	-201.604	755.273	-20.6433	-192.915	731.909	-108.878
280	2.79	26.2023	1171.82	128.192	94.6722	1171.31	177.467	-47.5242	1174.81	161.113	167.435	1010.47	286.626	-130.485	1003.22	298.531	10.8044	971.338	195.381	307.103	809.263	83.8353	121.75	980.2	37.4388	164.576	1018.02	76.7711	100.751	1055.83	38.0198	29.516	1104.44	54.3144	-254.497	705.317	293.472	-242.266	728.948	37.2024	-173.684	743.924	51.6843	-201.58	755.29	-20.6596	-192.899	731.906	-108.865
281	2.8	25.9457	1172.01	127.931	94.4749	1171.46	177.295	-47.7262	1174.88	161.076	167.084	1010.64	286.634	-130.59	1003.26	298.457	10.6941	971.417	195.27	305.838	811.017	81.9422	119.934	982.359	39.824	163.546	1019.74	78.5625	99.2401	1057.35	42.2479	29.0267	1107.64	57.4296	-254.613	705.39	293.473	-242.271	728.991	37.213	-173.699	744.013	51.6426	-201.533	755.359	-20.6956	-192.89	731.969	-108.903
282	2.81	25.6552	1172.29	127.501	94.3309	1171.61	177.163	-47.9237	1174.98	161.021	166.789	1011.21	286.94	-130.687	1003.31	298.407	10.5863	971.474	195.099	304.688	812.624	80.1333	118.191	984.402	41.9519	162.628	1021.29	80.4534	97.821	1059.23	45.2144	28.5283	1111.1	61.1356	-254.729	705.462	293.449	-242.274	729.057	37.1933	-173.724	744.112	51.5208	-201.5	755.396	-20.7448	-192.881	732.05	-108.95
283	2.82	25.3639	1172.51	127.261	94.1255	1171.76	176.997	-48.1514	1175.08	160.972	166.463	1011.43	286.903	-130.789	1003.33	298.374	10.4517	971.478	195.022	303.563	814.093	78.5763	116.575	986.19	44.2015	161.79	1022.73	82.1936	96.5098	1060.98	48.0771	28.0129	1113.55	64.7256	-254.837	705.492	293.401	-242.305	729.114	37.182	-173.764	744.184	51.4491	-201.499	755.397	-20.7347	-192.912	732.112	-108.985
284	2.83	25.0559	1172.65	127.3	93.8565	1171.87	176.853	-48.4204	1175.15	160.996	166.1	1011.27	286.567	-130.889	1003.33	298.367	10.2635	971.438	194.999	302.514	815.37	77.2545	115.09	987.706	46.6443	160.939	1023.95	83.9055	95.2493	1062.52	50.938	27.423	1115.42	68.4704	-254.944	705.492	293.369	-242.368	729.131	37.185	-173.814	744.207	51.4408	-201.539	755.393	-20.7026	-192.94	732.127	-108.962
285	2.84	24.7686	1172.73	127.403	93.5892	1171.95	176.722	-48.6767	1175.17	161.052	165.825	1011.29	286.452	-130.989	1003.32	298.316	10.0504	971.346	195.013	301.514	816.453	76.0052	113.645	988.995	48.9335	160.191	1024.97	85.6942	94.0014	1063.78	53.8197	26.7956	1116.85	72.3376	-255.058	705.447	293.285	-242.405	729.082	37.1867	-173.862	744.179	51.4478	-201.605	755.358	-20.6905	-192.959	732.119	-108.968
286	2.85	24.5526	1172.75	127.54	93.4011	1171.97	176.708	-48.8625	1175.16	161.07	165.597	1011.33	286.398	-131.085	1003.28	298.294	9.84094	971.278	194.968	300.601	817.42	74.8565	112.358	990.021	51.3023	159.379	1025.96	87.0936	92.83	1064.77	56.8571	26.1841	1117.81	76.4946	-255.177	705.387	293.198	-242.415	729	37.1863	-173.892	744.119	51.516	-201.649	755.328	-20.6848	-192.963	732.071	-108.958
287	2.86	24.4035	1172.77	127.697	93.278	1171.98	176.78	-49.0189	1175.14	161.156	165.396	1011.36	286.327	-131.171	1003.26	298.293	9.67055	971.263	194.91	299.823	818.286	73.9251	111.201	990.792	53.7934	158.543	1026.91	88.0969	91.7156	1065.62	59.8649	25.5166	1118.43	80.702	-255.306	705.366	293.206	-242.418	728.938	37.2023	-173.896	744.069	51.5952	-201.668	755.317	-20.674	-192.943	731.991	-108.897
288	2.87	24.2923	1172.87	127.708	93.1758	1172.03	176.741	-49.1482	1175.13	161.219	165.191	1011.39	286.244	-131.242	1003.25	298.257	9.5633	971.26	194.829	299.127	819.075	73.1177	110.08	991.549	55.9404	157.908	1027.55	89.667	90.7218	1066.31	62.9474	24.8122	1118.77	84.5787	-255.44	705.367	293.184	-242.411	728.901	37.1997	-173.87	744.033	51.6277	-201.642	755.313	-20.6974	-192.905	731.934	-108.876
289	2.88	24.1569	1173.08	127.582	93.0337	1172.15	176.628	-49.2935	1175.17	161.179	164.98	1011.43	286.14	-131.318	1003.25	298.231	9.4614	971.244	194.74	298.42	819.841	72.1871	109.064	992.2	58.1686	157.344	1028.07	91.3733	89.7787	1066.91	65.8152	24.0974	1118.97	88.2794	-255.554	705.382	293.138	-242.411	728.889	37.176	-173.873	744.033	51.6058	-201.61	755.328	-20.7419	-192.87	731.92	-108.886
290	2.89	23.9727	1173.32	127.461	92.8201	1172.34	176.506	-49.4744	1175.3	161.114	164.764	1011.52	286.046	-131.406	1003.24	298.197	9.33611	971.247	194.732	297.712	820.508	71.3404	108.086	992.809	60.4085	156.77	1028.44	92.9865	88.9268	1067.48	68.7643	23.402	1118.95	91.5972	-255.679	705.405	293.125	-242.426	728.926	37.1607	-173.908	744.088	51.5622	-201.629	755.339	-20.7057	-192.889	731.974	-108.895
291	2.9	23.752	1173.6	127.286	92.5941	1172.52	176.357	-49.6603	1175.43	161.101	164.561	1011.62	285.976	-131.531	1003.25	298.1	9.22965	971.188	194.878	296.94	821.139	70.5468	107.1	993.382	62.4343	156.374	1028.62	94.912	88.0555	1067.94	71.5077	22.7034	1118.62	93.7428	-255.808	705.407	293.096	-242.482	728.982	37.1512	-173.96	744.16	51.5252	-201.667	755.366	-20.653	-192.938	732.045	-108.892
292	2.91	23.5232	1173.85	127.131	92.3928	1172.65	176.178	-49.8544	1175.56	161.113	164.372	1011.73	285.925	-131.6	1003.32	298.241	9.05117	971.138	194.67	296.257	821.66	69.9282	106.262	993.86	64.68	156.156	1028.58	97.2927	87.2832	1068.29	74.2082	22.1533	1118.1	94.6946	-255.889	705.373	293.044	-242.545	729.033	37.1648	-174.01	744.207	51.5221	-201.706	755.363	-20.6296	-192.993	732.11	-108.908
293	2.92	23.3256	1174.02	127.09	92.2147	1172.73	176.048	-50.0294	1175.64	161.088	164.229	1011.79	285.833	-131.596	1003.37	298.464	8.80775	971.144	194.076	295.706	821.961	69.4655	105.514	994.127	66.81	155.79	1028.66	98.9234	86.594	1068.46	76.7091	21.9458	1117.73	95.0403	-255.931	705.302	293.026	-242.595	729.056	37.15	-174.048	744.232	51.4977	-201.721	755.343	-20.6023	-193.021	732.145	-108.92
294	2.93	23.1568	1174.14	127.152	92.0705	1172.8	175.973	-50.1889	1175.67	161.1	164.141	1011.81	285.79	-131.597	1003.37	298.588	8.75114	971.066	194.172	295.141	822.133	68.9849	104.806	994.287	68.7287	155.481	1028.72	100.359	86.1415	1068.49	79.2603	21.9651	1117.39	95.4118	-255.943	705.232	293.041	-242.594	729.024	37.1527	-174.062	744.218	51.5082	-201.73	755.331	-20.5684	-193.008	732.129	-108.918
295	2.94	23.0182	1174.18	127.302	91.9456	1172.87	175.937	-50.3213	1175.65	161.149	164.082	1011.76	285.778	-131.588	1003.3	298.599	8.78356	970.971	194.414	294.622	822.185	68.6291	104.306	994.337	70.8395	155.298	1028.74	101.783	85.7009	1068.5	81.372	22.107	1116.94	95.8379	-255.93	705.155	293.068	-242.563	728.931	37.1785	-174.057	744.178	51.547	-201.745	755.333	-20.5957	-192.97	732.067	-108.879
296	2.95	22.8617	1174.23	127.454	91.8453	1172.98	175.901	-50.4373	1175.6	161.267	164.045	1011.68	285.76	-131.572	1003.2	298.537	8.83922	970.915	194.61	294.123	822.14	68.4014	103.469	995.198	71.5607	155.136	1028.73	102.978	85.3143	1068.35	83.2979	22.2339	1116.39	96.1716	-255.9	705.088	293.082	-242.537	728.855	37.2003	-174.043	744.112	51.6204	-201.748	755.326	-20.6037	-192.94	732.004	-108.849
297	2.96	22.6896	1174.31	127.626	91.7374	1173.12	175.875	-50.5474	1175.57	161.352	164.001	1011.63	285.771	-131.563	1003.13	298.477	9.33046	969.905	196.151	293.654	822.059	68.3165	102.35	996.352	71.1161	154.895	1028.66	104.052	85.0256	1068.11	84.8585	22.3009	1115.83	96.4897	-255.866	705.038	293.122	-242.508	728.838	37.2068	-174.018	744.068	51.6504	-201.758	755.339	-20.5862	-192.921	731.959	-108.801
298	2.97	22.511	1174.45	127.709	91.6355	1173.26	175.836	-50.6578	1175.57	161.432	163.928	1011.63	285.845	-131.578	1003.12	298.403	10.4487	967.563	199.589	293.199	821.965	68.2143	102.429	994.833	73.4394	154.632	1028.56	105.012	84.7532	1067.89	85.9372	22.2701	1115.46	96.627	-255.852	704.971	293.12	-242.503	728.834	37.2084	-174.007	744.063	51.6599	-201.75	755.339	-20.5885	-192.913	731.939	-108.778
299	2.98	22.307	1174.67	127.608	91.5119	1173.41	175.713	-50.8025	1175.64	161.473	163.849	1011.66	285.905	-131.602	1003.13	298.317	10.314	968.019	199.042	292.794	821.894	68.0978	102.277	994.175	75.3004	154.399	1028.44	105.654	84.4683	1067.64	86.6487	22.1336	1115.23	96.6102	-255.84	704.944	293.129	-242.5	728.855	37.2046	-173.995	744.077	51.6342	-201.722	755.349	-20.6229	-192.935	731.965	-108.818
300	2.99	22.0693	1174.92	127.432	91.3721	1173.6	175.613	-50.9785	1175.73	161.553	163.778	1011.74	285.971	-131.637	1003.17	298.218	9.38836	970.214	196.085	292.443	821.803	68.0054	102.148	993.712	77.2147	154.186	1028.31	106.072	84.1601	1067.4	87.0314	21.9612	1115.07	96.5518	-255.812	704.906	293.124	-242.504	728.904	37.2068	-173.996	744.111	51.5984	-201.7	755.365	-20.6458	-192.968	732.008	-108.856
301	3	21.877	1175.12	127.344	91.2316	1173.78	175.523	-51.1204	1175.81	161.614	163.731	1011.81	286.047	-131.667	1003.2	298.124	9.14488	970.82	195.312	292.151	821.667	67.9799	101.867	993.425	78.3045	153.999	1028.14	106.395	83.8953	1067.11	87.2932	21.8083	1114.89	96.5126	-255.77	704.878	293.113	-242.52	728.967	37.2148	-173.991	744.147	51.5495	-201.689	755.378	-20.6273	-192.989	732.058	-108.883
302	3.01	21.7532	1175.26	127.304	91.1083	1173.93	175.469	-51.2301	1175.85	161.68	163.722	1011.85	286.133	-131.689	1003.22	298.04	9.09213	971.005	195.09	291.929	821.488	67.9996	101.649	993.148	79.0476	153.862	1027.94	106.653	83.71	1066.83	87.5144	21.6889	1114.67	96.5572	-255.714	704.848	293.114	-242.531	729.019	37.2005	-173.977	744.14	51.5575	-201.666	755.365	-20.6195	-192.997	732.084	-108.911
303	3.02	21.6658	1175.37	127.277	91.0503	1174.03	175.479	-51.2979	1175.88	161.76	163.744	1011.82	286.173	-131.695	1003.22	297.981	9.10935	971.077	194.965	291.804	821.287	68.0247	101.493	992.831	79.7879	153.805	1027.71	106.904	83.606	1066.53	87.8047	21.6084	1114.27	96.8038	-255.639	704.821	293.111	-242.51	729.037	37.1837	-173.961	744.143	51.5251	-201.64	755.369	-20.6219	-192.985	732.101	-108.929
304	3.03	21.6309	1175.38	127.312	91.0575	1174.06	175.483	-51.3237	1175.86	161.838	163.823	1011.73	286.109	-131.672	1003.19	297.892	9.15814	971.058	194.952	291.763	821.038	68.0326	101.4	992.523	80.4202	153.838	1027.47	107.147	83.5909	1066.2	88.2227	21.5341	1113.74	97.1316	-255.514	704.801	293.152	-242.467	729	37.1624	-173.912	744.114	51.5397	-201.611	755.369	-20.6635	-192.953	732.08	-108.949
305	3.04	21.6475	1175.32	127.428	91.1023	1174.01	175.509	-51.3179	1175.82	161.931	163.925	1011.62	286.018	-131.619	1003.15	297.821	9.23978	970.992	195.031	291.778	820.749	68.0604	101.376	992.213	80.9461	153.936	1027.21	107.385	83.6816	1065.87	88.8117	21.4652	1113.13	97.5735	-255.381	704.771	293.164	-242.409	728.931	37.1651	-173.857	744.053	51.6039	-201.59	755.372	-20.6876	-192.902	732.032	-108.92
306	3.05	21.6843	1175.24	127.556	91.1483	1173.94	175.563	-51.2969	1175.74	162.015	164.001	1011.54	285.939	-131.587	1003.11	297.771	9.31958	970.9	195.188	291.794	820.466	68.1047	101.42	991.902	81.4283	154.058	1026.92	107.576	83.8015	1065.6	89.3493	21.4445	1112.41	98.2185	-255.295	704.723	293.131	-242.372	728.896	37.178	-173.806	743.982	51.6523	-201.599	755.374	-20.6721	-192.879	731.956	-108.882
307	3.06	21.7051	1175.18	127.604	91.1827	1173.88	175.614	-51.2849	1175.66	162.064	164.055	1011.5	285.856	-131.572	1003.1	297.739	9.35814	970.836	195.339	291.843	820.231	68.2492	101.493	991.633	81.7887	154.161	1026.66	107.752	83.8961	1065.38	89.8274	21.4324	1111.78	98.8614	-255.252	704.675	293.105	-242.364	728.879	37.1704	-173.788	743.942	51.6818	-201.603	755.359	-20.6546	-192.867	731.899	-108.872
308	3.07	21.7038	1175.15	127.584	91.1979	1173.88	175.567	-51.2749	1175.64	162.053	164.105	1011.5	285.822	-131.562	1003.12	297.723	9.36279	970.862	195.344	291.924	820.048	68.3826	101.578	991.44	82.0056	154.267	1026.44	107.894	83.9682	1065.22	90.1532	21.4062	1111.29	99.3598	-255.223	704.666	293.12	-242.352	728.888	37.193	-173.78	743.935	51.7226	-201.591	755.354	-20.6282	-192.886	731.905	-108.874
309	3.08	21.6855	1175.17	127.442	91.1797	1173.93	175.442	-51.2745	1175.68	161.92	164.139	1011.56	285.805	-131.556	1003.18	297.702	9.33453	970.993	195.18	292.057	819.944	68.4827	101.648	991.326	82.0379	154.361	1026.27	107.987	84.0157	1065.12	90.3063	21.3236	1110.87	99.7748	-255.2	704.683	293.123	-242.364	728.94	37.2217	-173.804	743.998	51.659	-201.572	755.351	-20.6167	-192.929	731.967	-108.904
310	3.09	21.6812	1175.22	127.253	91.153	1174.01	175.277	-51.2834	1175.74	161.762	164.143	1011.62	285.767	-131.541	1003.27	297.685	9.31018	971.169	194.955	292.267	819.868	68.6162	101.738	991.211	81.9595	154.442	1026.11	108.072	84.0382	1064.99	90.374	21.1397	1110.44	100.095	-255.179	704.732	293.131	-242.397	729.028	37.218	-173.83	744.067	51.5866	-201.564	755.355	-20.6092	-192.965	732.047	-108.942
311	3.1	21.7105	1175.22	127.105	91.1673	1174.02	175.153	-51.241	1175.76	161.612	164.15	1011.68	285.77	-131.505	1003.33	297.707	9.32685	971.295	194.812	292.577	819.791	68.8654	101.884	990.983	81.902	154.519	1025.92	108.178	84.078	1064.79	90.4594	20.9351	1109.98	100.474	-255.155	704.795	293.138	-242.413	729.116	37.1989	-173.829	744.117	51.5112	-201.544	755.373	-20.6415	-192.986	732.108	-108.97
312	3.11	21.8021	1175.12	127.05	91.2492	1173.96	175.121	-51.1452	1175.71	161.495	164.2	1011.66	285.761	-131.434	1003.35	297.732	9.38236	971.336	194.727	292.944	819.686	69.1644	102.088	990.637	82.0082	154.625	1025.67	108.28	84.1514	1064.43	90.6174	20.7521	1109.49	100.983	-255.131	704.876	293.179	-242.376	729.119	37.1688	-173.801	744.121	51.4851	-201.52	755.365	-20.6632	-192.964	732.125	-108.979
313	3.12	21.9377	1174.96	127.027	91.3808	1173.81	175.176	-51.0215	1175.6	161.454	164.294	1011.56	285.717	-131.342	1003.32	297.746	9.45483	971.255	194.759	293.354	819.511	69.4994	102.303	990.199	82.1873	154.736	1025.38	108.342	84.2562	1063.9	90.8417	20.6095	1108.91	101.596	-255.114	704.955	293.237	-242.332	729.071	37.1878	-173.774	744.095	51.511	-201.512	755.361	-20.6671	-192.925	732.074	-108.957
314	3.13	22.1037	1174.69	127.105	91.5359	1173.62	175.263	-50.8811	1175.42	161.434	164.387	1011.47	285.695	-131.25	1003.28	297.777	9.56361	971.118	194.928	293.831	819.272	69.8923	102.502	989.722	82.3062	154.836	1025.05	108.304	84.3944	1063.29	91.051	20.522	1108.26	102.266	-255.101	704.997	293.237	-242.303	728.995	37.1991	-173.756	744.029	51.5858	-201.531	755.367	-20.6981	-192.907	731.989	-108.892
315	3.14	22.3109	1174.4	127.281	91.6767	1173.46	175.32	-50.7405	1175.25	161.398	164.461	1011.41	285.725	-131.176	1003.24	297.788	9.68353	970.977	195.172	294.352	819.038	70.3225	102.779	989.117	82.3904	154.947	1024.67	108.192	84.5094	1062.71	90.9908	20.4246	1107.63	102.783	-255.091	705.025	293.226	-242.303	728.95	37.196	-173.731	743.949	51.6792	-201.559	755.377	-20.7381	-192.885	731.928	-108.869
316	3.15	22.5016	1174.2	127.233	91.7825	1173.35	175.285	-50.6364	1175.14	161.319	164.501	1011.4	285.771	-131.128	1003.23	297.809	9.74919	970.919	195.282	294.961	818.844	70.8742	103.07	988.536	82.2073	155.054	1024.31	107.953	84.5847	1062.21	90.6676	20.3275	1107.1	102.886	-255.096	705.045	293.209	-242.314	728.939	37.2052	-173.718	743.921	51.7278	-201.59	755.367	-20.7416	-192.887	731.903	-108.856
317	3.16	22.6145	1174.11	126.933	91.8311	1173.28	175.135	-50.5569	1175.09	161.192	164.488	1011.41	285.856	-131.125	1003.27	297.817	9.73016	971.023	195.111	295.545	818.64	71.5068	103.296	988.062	81.5754	155.182	1023.98	107.592	84.5909	1061.79	90.0801	20.2728	1106.68	102.507	-255.129	705.089	293.214	-242.325	728.942	37.208	-173.747	743.952	51.6985	-201.601	755.355	-20.6975	-192.925	731.92	-108.873
318	3.17	22.6975	1174.08	126.496	91.8762	1173.21	174.939	-50.4816	1175.09	160.959	164.424	1011.47	285.973	-131.161	1003.35	297.844	9.67187	971.199	194.745	296.097	818.401	72.1939	103.516	987.69	80.6069	155.369	1023.63	107.179	84.6177	1061.34	89.2435	20.2645	1106.37	101.731	-255.153	705.119	293.242	-242.35	728.985	37.2226	-173.797	744.008	51.6312	-201.598	755.34	-20.653	-192.974	731.986	-108.922
319	3.18	22.7574	1174.06	125.98	91.9386	1173.13	174.779	-50.4099	1175.11	160.64	164.336	1011.56	286.17	-131.216	1003.43	297.865	9.59895	971.411	194.349	296.788	818.08	73.0321	103.857	987.243	79.5156	155.575	1023.2	106.734	84.7609	1060.82	88.2795	20.3211	1105.93	100.746	-255.157	705.146	293.265	-242.4	729.087	37.217	-173.836	744.093	51.561	-201.595	755.345	-20.6439	-193.019	732.071	-108.927
320	3.19	22.8417	1173.92	125.665	92.0028	1173	174.684	-50.3369	1175.08	160.342	164.228	1011.63	286.305	-131.294	1003.46	297.887	9.47493	971.644	193.813	297.664	817.596	74.0876	104.439	986.491	78.5432	155.822	1022.63	106.142	85.0319	1060.13	87.1755	20.4561	1105.12	99.5335	-255.171	705.144	293.269	-242.434	729.177	37.1689	-173.859	744.14	51.5367	-201.576	755.346	-20.621	-193.044	732.143	-108.963
321	3.2	22.9861	1173.59	125.604	92.1084	1172.78	174.635	-50.2028	1174.95	160.101	164.136	1011.62	286.366	-131.367	1003.43	297.902	9.37699	971.791	193.434	298.691	816.935	75.2764	105.18	985.465	77.5442	156.111	1021.86	105.322	85.3931	1059.19	85.8587	20.6642	1104.01	98.0075	-255.161	705.112	293.277	-242.425	729.185	37.1481	-173.847	744.144	51.5153	-201.554	755.358	-20.6546	-193.034	732.155	-108.996
322	3.21	23.1679	1173.15	125.759	92.2617	1172.5	174.691	-50.029	1174.73	159.969	164.093	1011.57	286.422	-131.446	1003.3	297.833	9.29981	971.812	193.207	299.885	816.139	76.5718	106.038	984.256	76.1553	156.509	1020.92	104.376	85.9343	1057.97	84.5968	20.9177	1102.53	96.342	-255.132	705.041	293.291	-242.366	729.096	37.1871	-173.812	744.101	51.5443	-201.553	755.363	-20.6458	-192.982	732.09	-108.935
323	3.22	23.3306	1172.69	125.867	92.4159	1172.16	174.824	-49.8683	1174.47	159.912	164.08	1011.5	286.404	-131.586	1003.12	297.633	9.35766	971.717	193.615	301.138	815.139	78.214	107.106	982.834	74.6359	157.056	1019.86	103.45	86.5726	1056.48	83.0639	21.1173	1100.7	94.3548	-255.117	704.918	293.267	-242.321	728.997	37.228	-173.775	744.032	51.6288	-201.559	755.363	-20.65	-192.928	731.997	-108.863
324	3.23	23.4795	1172.24	125.988	92.5775	1171.79	175.006	-49.7476	1174.2	159.752	164.08	1011.42	286.361	-131.726	1002.94	297.501	9.51021	971.63	194.554	302.525	813.926	80.1866	108.351	981.21	73.0487	157.624	1018.58	102.419	87.2499	1054.85	80.9607	21.2305	1098.74	91.851	-255.085	704.774	293.255	-242.304	728.921	37.224	-173.734	743.942	51.6822	-201.567	755.374	-20.6637	-192.895	731.922	-108.829
325	3.24	23.6466	1171.85	126.174	92.6626	1171.53	175.099	-49.6742	1174.02	159.545	164.117	1011.37	286.316	-131.79	1002.9	297.639	9.46842	971.593	194.787	303.957	812.702	82.1639	109.576	979.56	70.8714	158.09	1017.21	101.236	88.0694	1053.2	78.5078	21.3757	1096.62	88.6836	-255.05	704.61	293.202	-242.297	728.881	37.1835	-173.72	743.902	51.7073	-201.574	755.379	-20.6832	-192.89	731.887	-108.86
326	3.25	23.7034	1171.62	126.132	92.6419	1171.4	175.157	-49.6696	1173.92	159.417	164.162	1011.32	286.303	-131.886	1002.85	297.727	9.36072	971.548	194.93	305.55	811.449	84.4728	110.965	977.851	68.3952	158.65	1015.68	100.022	88.9791	1051.42	75.7403	21.5416	1094.42	84.936	-255.016	704.462	293.188	-242.316	728.873	37.2048	-173.743	743.916	51.7404	-201.596	755.375	-20.6445	-192.916	731.904	-108.834
327	3.26	23.634	1171.6	125.835	92.5121	1171.37	175.131	-49.7321	1173.88	159.269	163.777	1011.5	287.577	-132.002	1002.81	297.815	9.20639	971.515	194.99	307.334	810.029	87.2743	112.507	976.075	65.5481	159.169	1014.1	98.7487	89.9825	1049.59	72.3249	21.6511	1092.13	80.5925	-254.99	704.351	293.216	-242.374	728.901	37.2158	-173.537	743.645	50.8202	-201.689	755.302	-20.5487	-192.982	731.96	-108.821
328	3.27	23.5693	1171.63	125.572	92.3752	1171.41	175.097	-49.835	1173.9	159.055	162.98	1011.82	290.08	-132.11	1002.75	297.851	9.05333	971.508	194.885	308.948	808.703	89.7651	114.286	974.197	62.442	159.642	1012.33	97.4758	91.1544	1047.68	68.383	21.8776	1089.54	75.7173	-254.974	704.258	293.21	-242.444	728.968	37.1969	-172.983	742.985	48.7165	-201.814	755.154	-20.4576	-193.07	732.054	-108.876
329	3.28	23.5288	1171.65	125.428	92.2611	1171.47	175.141	-49.9402	1173.94	158.851	163.097	1011.37	289.71	-132.466	1002.94	297.482	8.97421	971.47	194.782	310.446	807.274	92.6357	116.289	972.177	58.9662	160.215	1010.39	96.4006	92.6083	1045.5	64.5337	22.4574	1086.86	69.9507	-254.923	704.166	293.224	-242.493	729.043	37.1924	-173.126	743.181	49.0595	-201.805	755.172	-20.4744	-193.115	732.113	-108.925
330	3.29	23.4709	1171.66	125.428	92.1351	1171.5	175.269	-50.0335	1173.94	158.764	163.54	1010.73	288.529	-133.2	1003.28	296.32	8.87083	971.416	194.633	311.927	805.688	95.845	118.621	969.981	55.5417	160.734	1008.16	95.3329	94.333	1043.08	60.8467	23.2808	1083.7	63.4977	-254.876	704.09	293.258	-242.501	729.074	37.1983	-173.441	743.543	50.0779	-201.752	755.248	-20.5341	-193.124	732.139	-108.938
331	3.3	23.414	1171.61	125.556	92.0348	1171.46	175.565	-50.1196	1173.89	158.778	164.138	1010.13	287.185	-133.613	1002.87	295.036	8.4546	971.399	193.707	313.614	803.938	98.7322	121.25	967.622	51.8012	161.243	1005.64	94.4705	96.2773	1040.67	56.5224	24.3622	1080.62	57.306	-254.856	704.027	293.294	-242.484	729.033	37.2293	-172.952	742.952	48.5784	-201.8	755.156	-20.5029	-193.131	732.113	-108.925
332	3.31	23.3665	1171.51	125.795	91.9459	1171.4	175.91	-50.2144	1173.8	158.832	164.696	1009.67	286.197	-133.439	1002.64	295.382	8.1282	971.527	193.045	315.436	802.156	101.654	124.335	964.971	48.2374	161.625	1002.82	93.7336	98.3943	1038.2	51.8718	25.6223	1077.48	51.6806	-254.851	703.966	293.298	-242.459	728.945	37.2558	-173.089	743.1	49.1247	-201.792	755.214	-20.5399	-193.122	732.062	-108.88
333	3.32	23.3154	1171.4	126.137	91.8426	1171.35	176.198	-50.3495	1173.7	158.972	165.107	1009.54	286.045	-132.573	1002.91	298.08	8.26979	971.733	193.6	317.275	800.312	104.847	127.772	962.168	44.501	161.868	999.678	93.1929	100.499	1034.9	48.6982	27.2274	1074.65	45.6874	-254.861	703.9	293.269	-242.435	728.845	37.3029	-173.667	743.746	51.0998	-201.726	755.348	-20.5857	-193.09	731.991	-108.81
334	3.33	23.2068	1171.34	126.461	91.7071	1171.34	176.447	-50.5182	1173.64	159.124	165.342	1009.87	286.852	-132.442	1002.75	298.464	8.01009	971.776	193.125	319.174	798.374	108.175	131.582	959.269	40.8912	161.853	996.062	92.6055	102.661	1031.3	45.9539	29.0745	1071.81	38.1148	-254.883	703.844	293.294	-242.428	728.793	37.3318	-173.799	743.863	51.6573	-201.728	755.377	-20.5413	-193.068	731.944	-108.751
335	3.34	23.0463	1171.33	126.616	91.5409	1171.4	176.614	-50.7091	1173.6	159.214	165.58	1009.82	287.016	-132.455	1002.68	298.572	8.6694	971.679	194.702	321.051	796.371	111.545	135.611	956.428	37.2132	161.553	992.014	92.0811	104.89	1027.66	43.024	30.4981	1067.71	32.4189	-254.94	703.811	293.318	-242.423	728.772	37.3249	-173.554	743.563	50.9131	-201.769	755.317	-20.5211	-193.051	731.925	-108.736
336	3.35	22.8493	1171.39	126.634	91.3086	1171.55	176.679	-50.9452	1173.59	159.303	165.831	1009.7	286.974	-132.496	1002.68	298.627	8.80272	971.685	195	322.884	794.341	115.059	139.862	953.528	33.5349	161.297	987.982	91.6551	107.071	1023.92	39.8007	31.5979	1062.9	26.9227	-254.999	703.804	293.316	-242.424	728.769	37.2708	-173.242	743.207	49.7818	-201.795	755.267	-20.5301	-193.055	731.94	-108.765
337	3.36	22.5861	1171.51	126.549	91.0253	1171.75	176.639	-51.2241	1173.61	159.408	166.08	1009.57	286.84	-132.537	1002.71	298.62	8.76009	971.711	195.005	324.594	792.274	118.698	144.198	950.689	30.0351	161.011	983.81	91.0065	108.753	1019.65	37.0707	32.3839	1057.37	21.4617	-255.063	703.83	293.307	-242.477	728.801	37.2936	-173.793	743.837	51.2234	-201.763	755.337	-20.5277	-193.1	731.982	-108.783
338	3.37	22.3011	1171.65	126.474	90.7415	1171.92	176.6	-51.5143	1173.66	159.473	166.306	1009.45	286.733	-132.569	1002.75	298.608	8.64519	971.795	194.745	326.229	790.235	122.374	148.606	947.702	26.9846	160.631	979.499	90.3381	110.281	1015.07	34.4505	32.7846	1050.59	15.8971	-255.136	703.87	293.307	-242.545	728.891	37.3095	-173.964	744.05	51.546	-201.764	755.343	-20.4814	-193.164	732.06	-108.779
339	3.38	22.0536	1171.73	126.474	90.5217	1172.03	176.664	-51.7285	1173.69	159.575	166.531	1009.32	286.679	-132.587	1002.79	298.618	8.56064	971.831	194.469	327.833	788.107	126.158	153.118	944.529	24.3908	160.197	974.811	89.5701	111.762	1010.14	31.7634	33.0758	1042.76	10.0223	-255.231	703.955	293.328	-242.582	728.954	37.3008	-174.027	744.125	51.6272	-201.762	755.359	-20.4535	-193.194	732.114	-108.786
340	3.39	21.853	1171.72	126.605	90.3539	1172.09	176.785	-51.9025	1173.68	159.68	166.762	1009.15	286.646	-132.584	1002.79	298.604	8.7459	971.75	194.905	329.486	785.932	129.938	157.719	941.666	22.2781	159.812	969.939	88.4977	113.108	1004.85	29.0608	33.7634	1035.21	4.56655	-255.348	704.04	293.322	-242.589	728.979	37.2764	-174.038	744.145	51.6567	-201.751	755.377	-20.4936	-193.183	732.126	-108.799
341	3.4	21.6956	1171.62	126.823	90.1962	1172.1	176.847	-52.0374	1173.61	159.792	167.03	1008.92	286.587	-132.548	1002.76	298.574	9.15465	971.58	195.826	331.19	783.698	133.626	162.413	939.051	19.9523	159.574	965.122	87.56	114.325	999.161	26.4527	34.3577	1026.51	-1.15433	-255.452	704.111	293.288	-242.546	728.932	37.2453	-174.022	744.128	51.6497	-201.734	755.389	-20.5268	-193.138	732.097	-108.817
342	3.41	21.5693	1171.5	127.055	90.0536	1172.11	176.905	-52.1508	1173.52	159.907	167.352	1008.65	286.517	-132.503	1002.71	298.523	9.14281	971.367	195.518	332.901	781.48	137.394	166.898	934.783	16.9844	159.265	959.485	86.6893	115.423	993.103	23.8814	35.5263	1016.78	-7.41825	-255.541	704.186	293.263	-242.508	728.859	37.2433	-173.999	744.094	51.6654	-201.714	755.388	-20.5473	-193.077	732.047	-108.822
343	3.42	21.4261	1171.37	127.324	89.9316	1172.11	177.005	-52.2766	1173.41	160.06	167.678	1008.36	286.414	-132.474	1002.65	298.487	9.12484	971.06	195.431	334.675	779.381	141.842	171.148	930.48	15.8757	159.06	953.493	85.1103	116.476	986.641	21.3353	37.4562	1005.62	-14.4271	-255.623	704.211	293.226	-242.505	728.81	37.2503	-173.975	744.043	51.6906	-201.719	755.375	-20.5887	-193.048	731.998	-108.768
344	3.43	21.2629	1171.27	127.573	89.7947	1172.09	177.079	-52.4464	1173.33	160.206	167.968	1008.11	286.305	-132.471	1002.61	298.476	9.13819	970.952	195.455	336.324	777.379	146.92	175.094	926.12	15.3587	158.768	947.111	84.1228	117.523	979.725	18.8275	39.6311	994.675	-21.2335	-255.674	704.221	293.207	-242.527	728.794	37.2593	-174.002	744.016	51.6936	-201.756	755.38	-20.6133	-193.049	731.978	-108.745
345	3.44	21.0774	1171.26	127.682	89.6698	1172.11	177.131	-52.6136	1173.3	160.324	168.234	1007.89	286.182	-132.443	1002.58	298.431	9.14395	970.977	195.355	337.965	775.485	151.273	178.806	921.548	15.0883	158.452	942.78	83.3602	118.499	972.456	16.3391	42.3537	983.743	-27.8958	-255.681	704.211	293.184	-242.537	728.805	37.2743	-173.754	743.685	50.8114	-201.808	755.331	-20.5456	-193.062	731.979	-108.747
346	3.45	20.9161	1171.31	127.681	89.5663	1172.14	177.198	-52.7616	1173.28	160.418	168.497	1007.67	285.969	-132.405	1002.56	298.37	9.1605	971.06	195.167	339.578	773.706	155.606	182.36	916.721	14.8297				119.51	964.855	13.7253	45.5804	972.885	-34.5564	-255.66	704.169	293.168	-242.556	728.824	37.2741	-173.425	743.3	49.6705	-201.855	755.237	-20.455	-193.083	732.004	-108.766
347	3.46	20.7908	1171.37	127.65	89.454	1172.17	177.323	-52.8876	1173.26	160.535	168.754	1007.45	285.724	-132.343	1002.56	298.37	9.1951	971.115	194.985	341.091	772.034	159.92	185.745	911.757	14.3902				120.548	956.898	10.9937	49.0281	962.061	-41.0219	-255.628	704.16	293.203	-242.563	728.848	37.2628	-173.921	743.899	51.1414	-201.808	755.309	-20.5004	-193.109	732.027	-108.781
348	3.47	20.7083	1171.46	127.691	89.3721	1172.22	177.466	-52.9767	1173.28	160.666	169.03	1007.25	285.484	-132.253	1002.59	298.373	9.23818	971.141	194.834	342.587	770.455	164.245	189.03	906.673	13.5807				121.853	948.792	8.08183	52.8442	951.139	-47.215	-255.574	704.197	293.241	-242.565	728.895	37.2699	-174.045	744.071	51.5265	-201.792	755.361	-20.5475	-193.11	732.057	-108.799
349	3.48	20.6568	1171.54	127.773	89.3419	1172.28	177.554	-53.0289	1173.28	160.773	169.29	1007.19	285.09	-132.133	1002.62	298.34	9.31728	971.091	194.749	344.001	768.963	168.679	192.034	900.955	12.9405				123.438	940.562	4.94515	56.9949	940.147	-53.3933	-255.485	704.232	293.264	-242.529	728.901	37.267	-174.051	744.108	51.6211	-201.774	755.394	-20.5829	-193.096	732.067	-108.798
350	3.49	20.6359	1171.59	127.904	89.3235	1172.33	177.68	-53.0567	1173.27	160.874	169.533	1007.19	284.655	-132.03	1002.61	298.296	9.41517	970.971	194.701	345.279	767.588	173.007	194.943	894.777	12.1717				125.343	932.201	2.00444	61.4586	929.063	-59.3136	-255.417	704.225	293.262	-242.492	728.89	37.2141	-173.726	743.776	50.7507	-201.767	755.327	-20.5763	-193.073	732.043	-108.781
351	3.5	20.6356	1171.61	128.045	89.2943	1172.37	177.841	-53.0733	1173.25	161.02	169.823	1006.7	284.886	-131.947	1002.61	298.233	9.52749	970.849	194.705	346.432	766.157	177.34	197.833	888.152	11.3042				127.683	923.84	-0.94991	66.2592	918.072	-65.0853	-255.355	704.221	293.294	-242.467	728.881	37.2437	-173.331	743.335	49.6392	-201.766	755.247	-20.5264	-193.047	732.011	-108.774
352	3.51	20.5938	1171.64	128.188	89.2587	1172.41	177.992	-53.0991	1173.24	161.162	170.026	1006.31	285.124	-131.876	1002.6	298.145	9.63571	970.74	194.743	347.444	764.697	181.661	200.82	881.281	10.3455				130.521	915.579	-3.785	71.5074	907.105	-70.7129	-255.278	704.228	293.317	-242.45	728.873	37.2657	-173.758	743.846	51.183	-201.705	755.336	-20.5531	-193.039	732.01	-108.815
353	3.52	20.521	1171.73	128.286	89.221	1172.49	178.076	-53.1478	1173.25	161.256	170.184	1006.07	285.234	-131.833	1002.6	298.056	9.72582	970.675	194.78	348.296	763.194	185.881	203.854	874.097	9.51513				133.832	907.539	-7.16998	77.2554	896.179	-76.0312	-255.192	704.191	293.283	-242.445	728.887	37.2503	-173.86	743.973	51.5547	-201.692	755.347	-20.5817	-193.06	732.035	-108.845
354	3.53	20.4808	1171.84	128.315	89.1851	1172.55	178.153	-53.1684	1173.29	161.349	170.326	1005.86	285.325	-131.735	1002.79	297.87	9.83638	970.652	194.855	348.972	761.539	190.163	206.86	866.632	9.30334	162.921	877.641	63.5334	137.754	900.295	-12.3241	82.7104	886.266	-80.7998	-255.092	704.187	293.297	-242.44	728.907	37.2773	-173.888	744.031	51.6262	-201.685	755.375	-20.5813	-193.062	732.059	-108.838
355	3.54	20.519	1171.9	128.397	89.1917	1172.59	178.274	-53.1455	1173.31	161.447	170.506	1005.66	285.388	-131.522	1003.11	297.717	9.97809	970.636	194.915	349.404	759.793	194.509	210.196	859.54	8.9752	163.521	873.377	61.2071	141.569	893.424	-16.622	88.3049	877.287	-85.6024	-254.977	704.186	293.33	-242.412	728.924	37.2921	-173.866	744.036	51.6762	-201.653	755.375	-20.5537	-193.052	732.067	-108.827
356	3.55	20.6091	1171.89	128.522	89.2318	1172.59	178.351	-53.1047	1173.3	161.508	170.703	1005.45	285.298	-131.437	1002.93	297.998	10.1258	970.628	194.939	349.521	758.332	199.542	213.723	852.78	8.612	165.018	867.317	58.847	145.725	885.798	-19.3162	94.8948	867.838	-89.6995	-254.884	704.195	293.368	-242.37	728.932	37.2731	-173.823	744.024	51.6837	-201.633	755.367	-20.5241	-193.04	732.052	-108.826
357	3.56	20.6853	1171.87	128.614	89.2875	1172.54	178.462	-53.0725	1173.27	161.512	170.908	1005.24	285.073	-131.514	1002.7	298.029	10.2399	970.594	194.929	349.496	757.11	204.893	217.383	846.317	8.36014	166.725	860.803	56.6516	149.814	877.931	-20.7098	101.964	858.135	-92.6765	-254.815	704.207	293.371	-242.349	728.914	37.268	-173.801	743.993	51.7485	-201.612	755.367	-20.5256	-193.028	732.012	-108.807
358	3.57	20.7241	1171.82	128.705	89.334	1172.47	178.586	-53.0447	1173.18	161.615	171.145	1005.02	284.753	-131.473	1002.65	298.005	10.3256	970.521	194.988	350.014	754.833	207.456	221.063	840.224	8.24279	168.665	854.243	54.5222	153.985	870.501	-22.7128	109.062	849.33	-95.8725	-254.765	704.238	293.379	-242.35	728.896	37.2717	-173.522	743.625	50.9077	-201.655	755.306	-20.541	-193.016	731.98	-108.786
359	3.58	20.7108	1171.75	128.748	89.3266	1172.41	178.624	-53.0188	1173.1	161.715	171.433	1004.77	284.416	-131.382	1002.69	297.985	10.3731	970.459	195.039	350.573	752.404	209.315	224.709	834.559	8.34636	170.54	847.733	52.4584	158.471	863.106	-25.0679	116.271	841.035	-99.0871	-254.739	704.327	293.419	-242.349	728.891	37.2689	-173.189	743.2	49.803	-201.716	755.205	-20.5018	-193.017	731.966	-108.775
360	3.59	20.6816	1171.73	128.719	89.3078	1172.38	178.547	-53.0262	1173.08	161.704	171.743	1004.55	284.108	-131.284	1002.73	297.968	10.3931	970.447	194.983	351.064	750.005	210.962	228.377	829.099	8.56472	172.594	841.129	50.7738	163.254	856.495	-27.7362	123.829	833.402	-103.079	-254.74	704.431	293.416	-242.368	728.914	37.2389	-173.68	743.778	51.2311	-201.696	755.302	-20.5452	-193.042	731.977	-108.775
361	3.6	20.6508	1171.75	128.585	89.3087	1172.41	178.427	-53.0373	1173.06	161.662	172.071	1004.34	283.862	-131.173	1002.78	297.913	10.445	970.479	194.83	350.248	747.826	214.842	232.049	823.898	8.8875	175.181	834.459	49.553	168.436	850.847	-29.8814	131.804	826.549	-108.028	-254.761	704.538	293.411	-242.392	728.964	37.2067	-173.825	743.967	51.5319	-201.696	755.329	-20.5729	-193.085	732.003	-108.806
362	3.61	20.6412	1171.75	128.472	89.3377	1172.46	178.276	-53.0007	1173.04	161.653	172.425	1004.14	283.763	-131.034	1002.84	297.861	10.5752	970.508	194.755	348.135	746.529	221.765	235.695	819.041	9.16742	177.686	828.387	48.3842	172.698	844.688	-30.4107	139.445	819.595	-111.25	-254.79	704.683	293.43	-242.391	729.011	37.2175	-173.86	744.04	51.5805	-201.663	755.339	-20.6074	-193.091	732.039	-108.879
363	3.62	20.6741	1171.71	128.46	89.3961	1172.48	178.176	-52.9425	1173.02	161.684	172.792	1003.94	283.781	-130.873	1002.9	297.795	10.7998	970.496	194.853	348.423	745.854	225.048	239.27	814.327	9.62789	180.103	822.732	47.0309	176.792	838.746	-31.5898	146.819	812.939	-113.562	-254.83	704.878	293.45	-242.359	729.034	37.2303	-173.853	744.065	51.5894	-201.649	755.352	-20.6061	-193.075	732.054	-108.861
364	3.63	20.7137	1171.66	128.516	89.4988	1172.47	178.106	-52.8563	1172.94	161.738	173.133	1003.73	283.814	-130.715	1002.96	297.724	11.0475	970.489	194.983	348.115	744.508	228.206	242.778	809.85	10.1218	182.541	817.482	45.7518	180.965	833.316	-32.8573	153.94	806.747	-115.466	-254.877	705.084	293.464	-242.338	729.047	37.2387	-173.836	744.065	51.6442	-201.637	755.375	-20.5804	-193.061	732.049	-108.794
365	3.64	20.8063	1171.6	128.537	89.6299	1172.46	178.033	-52.7401	1172.85	161.81	173.483	1003.52	283.826	-130.537	1003.03	297.668	11.3332	970.5	195.057	347.542	743.055	231.343	246.217	805.619	10.6688	184.994	812.566	44.7416	185.033	828.181	-33.8773	160.778	801.076	-117.161	-254.935	705.278	293.438	-242.304	729.061	37.2553	-173.793	744.043	51.7143	-201.609	755.41	-20.5853	-193.031	732.026	-108.774
366	3.65	20.9334	1171.51	128.525	89.7749	1172.44	177.989	-52.6085	1172.76	161.84	173.837	1003.29	283.85	-130.35	1003.09	297.632	11.6284	970.486	195.103	346.913	741.571	234.445	249.523	801.619	11.4338	187.426	807.944	43.9744	189	823.345	-34.5432	167.468	795.815	-118.434	-254.98	705.466	293.474	-242.265	729.06	37.2704	-173.74	744.015	51.7349	-201.555	755.404	-20.5803	-192.979	731.997	-108.756
367	3.66	21.0515	1171.42	128.493	89.8962	1172.41	177.918	-52.4847	1172.7	161.835	174.221	1003.03	283.871	-130.175	1003.14	297.555	11.8794	970.467	195.061	346.24	740.094	237.353	252.708	797.955	12.0018	189.76	803.661	43.3841	192.764	818.9	-35.2296	173.795	791.039	-119.52	-255.024	705.643	293.506	-242.243	729.056	37.2825	-173.709	743.99	51.7654	-201.509	755.374	-20.5587	-192.936	731.955	-108.754
368	3.67	21.1257	1171.38	128.35	89.9801	1172.39	177.782	-52.4053	1172.66	161.762	174.601	1002.79	283.816	-130.017	1003.2	297.456	12.0666	970.499	194.941	345.457	738.719	240.1	255.802	794.585	12.3555	191.959	799.621	42.8972	196.311	814.781	-35.909	179.734	786.657	-120.345	-255.066	705.811	293.487	-242.227	729.053	37.2252	-173.711	743.993	51.7216	-201.499	755.335	-20.6013	-192.93	731.938	-108.788
369	3.68	21.1513	1171.37	128.198	90.0353	1172.38	177.623	-52.3414	1172.63	161.698	174.956	1002.6	283.716	-129.884	1003.28	297.356	12.1839	970.535	194.803	344.516	737.407	242.569	258.407	791.134	13.1058	193.924	795.809	42.5005	199.603	810.986	-36.3123	185.141	782.672	-121.014	-255.107	705.988	293.472	-242.247	729.083	37.2049	-173.745	744.019	51.6799	-201.514	755.323	-20.6539	-192.946	731.952	-108.844
370	3.69	21.1794	1171.36	128.069	90.0713	1172.39	177.497	-52.2724	1172.63	161.635	175.283	1002.46	283.637	-129.77	1003.38	297.256	12.269	970.577	194.683	343.469	736.197	244.91	260.749	787.733	13.9615	195.767	792.316	42.2017	202.599	807.437	-36.5566	190.013	779.104	-121.493	-255.12	706.148	293.477	-242.277	729.136	37.1982	-173.784	744.064	51.6229	-201.557	755.307	-20.6229	-192.983	731.981	-108.857
371	3.7	21.2256	1171.39	127.872	90.1332	1172.4	177.353	-52.1981	1172.64	161.571	175.572	1002.33	283.561	-129.645	1003.48	297.135	12.3903	970.63	194.593	342.707	735.008	247.016	262.856	784.498	14.6474	197.64	789.116	42.096	205.4	804.129	-36.7711	194.318	775.836	-121.873	-255.111	706.309	293.493	-242.289	729.196	37.172	-173.804	744.112	51.5722	-201.562	755.337	-20.6337	-193.003	732.023	-108.888
372	3.71	21.3413	1171.37	127.717	90.2387	1172.39	177.246	-52.0698	1172.65	161.503	175.85	1002.18	283.486	-129.495	1003.56	296.988	12.5877	970.626	194.599	342.061	733.869	248.865	264.855	781.248	15.3828	199.274	786.412	42.0061	208.04	800.938	-36.8824	198.199	772.78	-122.039	-255.105	706.477	293.538	-242.26	729.246	37.1048	-173.782	744.14	51.5273	-201.537	755.372	-20.6867	-192.986	732.033	-108.902
373	3.72	21.499	1171.28	127.712	90.3858	1172.36	177.161	-51.9109	1172.64	161.459	176.115	1002.04	283.421	-129.331	1003.61	296.852	12.8427	970.592	194.743	341.361	732.821	250.665	266.275	777.842	16.7643	200.572	784.233	41.842	210.436	797.902	-36.7352	201.675	769.822	-122.075	-255.1	706.627	293.584	-242.218	729.27	37.0991	-173.752	744.129	51.5511	-201.506	755.415	-20.7696	-192.945	732.032	-108.934
374	3.73	21.6658	1171.16	127.639	90.541	1172.32	177.059	-51.7548	1172.61	161.397	176.35	1001.92	283.396	-129.184	1003.67	296.727	13.0607	970.584	194.83	340.712	731.871	252.395	266.996	774.322	18.6181	201.89	781.728	41.739	212.528	795.036	-36.3658	204.654	766.908	-122.068	-255.096	706.751	293.588	-242.173	729.289	37.0993	-173.713	744.108	51.5767	-201.469	755.432	-20.8154	-192.907	732.027	-108.93
375	3.74	21.8194	1171.03	127.528	90.7171	1172.24	176.987	-51.5864	1172.57	161.288	176.578	1001.8	283.37	-129.064	1003.69	296.614	13.2399	970.571	194.881	340.152	730.997	253.971	268.148	771.409	19.449	202.929	779.294	41.6472	214.683	791.815	-36.3912	207.331	763.954	-121.899	-255.104	706.835	293.555	-242.139	729.289	37.0639	-173.671	744.083	51.5707	-201.435	755.403	-20.8094	-192.895	732.004	-108.939
376	3.75	21.9891	1170.85	127.49	90.893	1172.12	176.913	-51.4429	1172.49	161.258	176.785	1001.68	283.343	-128.973	1003.7	296.563	13.3649	970.577	194.903	339.613	730.162	255.364	269.259	768.706	20.1883	203.753	776.88	41.5344	216.927	788.144	-36.7774	209.695	760.939	-121.567	-255.114	706.877	293.529	-242.144	729.265	37.0811	-173.651	744.024	51.6091	-201.443	755.366	-20.7749	-192.901	731.957	-108.915
377	3.76	22.113	1170.69	127.431	91.0597	1171.97	176.798	-51.3137	1172.44	161.192	176.975	1001.55	283.282	-128.917	1003.71	296.507	13.4577	970.623	194.919	339.112	729.362	256.683	270.204	766.177	20.7519	204.319	774.369	41.5916	218.446	785.059	-36.8574	211.685	758.01	-121.29	-255.104	706.898	293.514	-242.164	729.249	37.1355	-173.651	743.991	51.6525	-201.451	755.325	-20.7268	-192.927	731.914	-108.885
378	3.77	22.2352	1170.56	127.322	91.2494	1171.82	176.687	-51.1404	1172.38	161.042	177.163	1001.46	283.148	-128.866	1003.72	296.461	13.5309	970.687	194.93	338.677	728.648	257.784	271.078	763.764	21.232	204.891	771.922	41.7873	219.635	782.252	-36.5928	213.314	755.136	-120.999	-255.046	706.904	293.506	-242.139	729.243	37.1277	-173.641	743.976	51.626	-201.443	755.285	-20.7051	-192.938	731.904	-108.913
379	3.78	22.4109	1170.44	127.25	91.4575	1171.68	176.58	-50.9111	1172.36	160.885	177.358	1001.39	282.978	-128.8	1003.74	296.428	13.6154	970.745	194.939	338.183	728.067	258.958	271.758	761.374	21.7056	205.372	769.576	41.8469	220.617	779.447	-36.1213	214.632	752.33	-120.7	-254.954	706.923	293.504	-242.1	729.266	37.0884	-173.623	743.998	51.5787	-201.413	755.28	-20.7076	-192.928	731.928	-108.972
380	3.79	22.6333	1170.38	127.123	91.6635	1171.56	176.529	-50.6874	1172.39	160.775	177.52	1001.35	282.837	-128.724	1003.79	296.467	13.7042	970.833	194.989	337.755	727.553	259.961	272.329	759.111	22.0897	205.748	767.256	41.9734	221.443	776.721	-35.8568	215.611	749.637	-120.463	-254.855	706.975	293.561	-242.078	729.319	37.0851	-173.598	744.041	51.5517	-201.397	755.345	-20.7368	-192.922	731.961	-108.969
381	3.8	22.8913	1170.37	126.918	91.8673	1171.46	176.446	-50.4621	1172.46	160.621	177.655	1001.33	282.702	-128.634	1003.86	296.532	13.7783	970.978	194.95	337.321	727.072	260.939	272.818	756.857	22.4858	206.119	764.966	42.1138	222.101	773.994	-35.6237	216.401	747.01	-120.233	-254.709	707.033	293.679	-242.042	729.388	37.075	-173.552	744.113	51.4828	-201.369	755.432	-20.7868	-192.9	732.011	-108.964
382	3.81	23.1841	1170.31	126.794	92.0892	1171.36	176.328	-50.209	1172.49	160.514	177.797	1001.28	282.594	-128.527	1003.9	296.578	13.8673	971.074	194.919	336.947	726.655	261.748	273.225	754.558	22.7122	206.445	762.637	42.1804	222.668	771.26	-35.5191	217.051	744.307	-119.865	-254.577	707.061	293.733	-242.006	729.427	37.0755	-173.222	743.812	50.5591	-201.352	755.403	-20.8337	-192.872	732.042	-108.987
383	3.82	23.4504	1170.2	126.828	92.3191	1171.18	176.319	-49.9772	1172.49	160.419	177.911	1001.2	282.456	-128.454	1003.92	296.67	13.9547	971.097	195.006	336.561	726.242	262.461	273.571	752.254	22.866	206.739	760.276	42.5005	223.192	768.442	-35.3272	217.516	741.479	-119.396	-254.494	707.058	293.742	-241.97	729.438	37.0658	-172.828	743.399	49.461	-201.365	755.317	-20.8388	-192.866	732.044	-108.996
384	3.83	23.6094	1170.07	126.83	92.4857	1171.03	176.279	-49.805	1172.49	160.386	177.991	1001.1	282.297	-128.418	1003.92	296.778	13.9915	971.091	195.15	336.075	725.785	263.198	273.927	750.034	23.1092	206.854	758.071	42.5538	223.845	765.951	-35.3466	217.751	738.625	-119.126	-254.435	707.023	293.744	-241.972	729.417	37.1168	-173.298	743.938	51.035	-201.333	755.383	-20.7959	-192.896	732.028	-108.962
385	3.84	23.7452	1169.96	126.837	92.6262	1170.92	176.221	-49.6422	1172.47	160.408	178.065	1000.97	282.116	-128.388	1003.91	296.868	13.9762	971.057	195.25	335.647	725.316	263.761	274.306	748.066	23.325	206.851	755.804	42.5708	224.671	763.93	-35.8799	217.967	735.841	-118.833	-254.38	706.987	293.729	-241.978	729.367	37.1441	-173.442	744.029	51.4503	-201.343	755.358	-20.7384	-192.933	731.995	-108.936
386	3.85	23.8828	1169.86	126.922	92.7456	1170.8	176.224	-49.4977	1172.44	160.499	178.158	1000.83	281.931	-128.357	1003.92	296.997	13.9422	971.028	195.351	335.253	724.825	264.281	274.392	745.886	23.7573	206.832	753.466	42.879	225.021	761.27	-35.7279	218.336	733.811	-118.373	-254.341	706.958	293.704	-241.99	729.316	37.1643	-173.497	744.012	51.5926	-201.392	755.306	-20.6717	-192.963	731.951	-108.876
387	3.86	24.0102	1169.8	127.001	92.8551	1170.73	176.204	-49.3916	1172.44	160.573	178.264	1000.69	281.688	-128.335	1003.95	297.115	13.9331	971.024	195.47	334.816	724.351	264.928	274.394	743.767	24.0611	206.704	751.363	43.0855	225.246	758.794	-35.5397	218.539	733.222	-117.963	-254.31	706.963	293.701	-242.015	729.287	37.1989	-173.52	744.003	51.6379	-201.448	755.297	-20.652	-192.997	731.928	-108.832
388	3.87	24.1296	1169.8	126.964	92.9683	1170.69	176.131	-49.2861	1172.46	160.556	178.392	1000.56	281.409	-128.28	1003.99	297.213	13.9455	971.063	195.456	334.371	723.88	265.487	274.047	741.242	24.6327	206.487	749.464	43.2305	225.201	756.467	-34.947	218.388	733.196	-117.726	-254.255	706.989	293.746	-241.993	729.283	37.195	-173.507	744.025	51.6624	-201.461	755.305	-20.6627	-193.011	731.923	-108.823
389	3.88	24.2454	1169.86	126.881	93.0808	1170.68	176.034	-49.1736	1172.5	160.565	178.562	1000.45	281.117	-128.188	1004.05	297.31	13.9766	971.177	195.382	333.946	723.456	265.967	273.352	738.649	25.5951	206.433	748.185	43.3496	224.778	754.899	-34.0948	218.265	733.229	-117.673	-254.155	707.08	293.836	-241.951	729.3	37.2058	-173.199	743.735	50.7793	-201.477	755.246	-20.6282	-192.996	731.963	-108.842
390	3.89	24.3002	1169.95	126.782	93.1561	1170.69	175.941	-49.0943	1172.59	160.52	178.773	1000.37	280.825	-128.113	1004.13	297.394	13.9744	971.313	195.258	333.426	722.978	266.503	273.284	737.632	26.1153	206.464	747.538	43.527	224.792	755.104	-33.5474	218.322	733.385	-117.843	-254.067	707.176	293.924	-241.924	729.353	37.233	-172.846	743.424	49.6177	-201.532	755.192	-20.549	-193.016	732.034	-108.825
391	3.9	24.2964	1170.02	126.66	93.19	1170.69	175.825	-49.0781	1172.66	160.489	178.976	1000.28	280.53	-128.056	1004.18	297.442	13.9486	971.403	195.174	332.852	722.404	266.892	273.333	737.46	26.3965	206.479	747.288	43.6122	224.921	755.604	-33.2175	218.515	733.709	-117.975	-254.012	707.269	293.968	-241.937	729.42	37.2405	-173.346	744.123	51.0116	-201.48	755.373	-20.6469	-193.072	732.092	-108.827
392	3.91	24.2817	1170.02	126.634	93.2104	1170.69	175.693	-49.0682	1172.69	160.504	179.173	1000.19	280.279	-127.992	1004.22	297.482	13.9464	971.415	195.225	332.256	721.773	267.088	273.637	737.761	26.1731	206.46	747.24	43.6275	225.288	756.137	-33.3953	218.708	734.059	-117.928	-253.986	707.344	293.97	-241.953	729.436	37.2526	-173.504	744.323	51.323	-201.514	755.404	-20.6491	-193.143	732.1	-108.795
393	3.92	24.242	1169.97	126.695	93.2433	1170.67	175.64	-49.0528	1172.68	160.621	179.354	1000.12	280.137	-127.936	1004.25	297.504	13.9659	971.365	195.354	331.577	721.131	267.355	274.285	738.495	25.4819	206.432	747.279	43.6298	225.972	756.813	-33.943	218.879	734.073	-117.86	-253.989	707.424	293.977	-241.963	729.424	37.2498	-173.568	744.406	51.4558	-201.566	755.388	-20.5971	-193.184	732.082	-108.755
394	3.93	24.2027	1169.91	126.787	93.2601	1170.64	175.586	-49.0535	1172.63	160.744	179.49	1000.07	280.076	-127.886	1004.26	297.504	14.0104	971.288	195.516	330.933	720.474	267.54	274.468	738.612	25.3424	206.383	747.305	43.5979	226.288	756.797	-34.0834	219.072	733.803	-117.807	-254.022	707.52	293.963	-241.977	729.376	37.2674	-173.628	744.463	51.5045	-201.621	755.362	-20.5479	-193.191	732.043	-108.738
395	3.94	24.1962	1169.84	126.845	93.2978	1170.63	175.552	-49.0279	1172.58	160.836	179.591	1000.05	280.072	-127.842	1004.29	297.538	14.1287	971.191	195.745	330.397	719.909	267.566	274.52	738.442	25.366	206.364	747.359	43.522	226.535	756.578	-34.1137	219.238	733.51	-117.841	-254.064	707.656	293.923	-241.97	729.324	37.255	-173.659	744.5	51.5328	-201.669	755.35	-20.5405	-193.183	731.985	-108.708
396	3.95	24.2156	1169.83	126.855	93.3674	1170.63	175.568	-48.9859	1172.56	160.903	179.661	1000.08	280.129	-127.797	1004.33	297.531	14.2864	971.191	195.926	329.913	719.508	267.592	274.527	738.196	25.3748	206.393	747.422	43.4273	226.725	756.368	-34.1608	219.349	733.289	-117.896	-254.11	707.819	293.888	-241.933	729.336	37.1925	-173.659	744.576	51.5453	-201.665	755.4	-20.5544	-193.149	731.945	-108.635
397	3.96	24.2161	1169.9	126.78	93.4059	1170.67	175.521	-48.9449	1172.59	160.974	179.675	1000.16	280.246	-127.767	1004.39	297.497	14.4123	971.331	195.904	329.462	719.263	267.712	274.253	737.674	25.6148	206.42	747.49	43.3213	226.621	755.948	-34.0554	219.393	733.21	-117.988	-254.159	708.037	293.933	-241.892	729.387	37.1931	-173.65	744.696	51.5285	-201.605	755.48	-20.54	-193.15	731.967	-108.609
398	3.97	24.2119	1169.99	126.691	93.4189	1170.7	175.438	-48.9166	1172.67	160.98	179.662	1000.25	280.342	-127.753	1004.44	297.455	14.4705	971.541	195.749	329.046	719.103	267.854	273.659	736.835	26.2243	206.418	747.505	43.2148	226.149	755.242	-33.7038	219.389	733.212	-118.111	-254.214	708.309	294.048	-241.863	729.463	37.2323	-173.637	744.845	51.4894	-201.553	755.578	-20.5282	-193.165	732.026	-108.578
399	3.98	24.1935	1170.05	126.671	93.4224	1170.71	175.394	-48.929	1172.75	160.948	179.636	1000.33	280.437	-127.766	1004.47	297.422	14.4787	971.719	195.63	328.702	719.025	267.947	273.635	736.814	25.9981	206.377	747.457	43.1255	225.965	755.119	-33.6728	219.358	733.214	-118.233	-254.298	708.549	294.125	-241.864	729.567	37.1757	-173.693	745.022	51.4453	-201.556	755.683	-20.565	-193.185	732.083	-108.591
400	3.99	24.1319	1170.08	126.717	93.3674	1170.68	175.397	-48.9945	1172.82	160.995	179.581	1000.4	280.538	-127.81	1004.47	297.377	14.4155	971.79	195.638	328.468	719.017	268.006	273.909	737.26	25.265	206.26	747.388	43.0851	225.836	755.136	-33.7366	219.306	733.193	-118.308	-254.394	708.757	294.149	-241.921	729.683	37.0948	-173.832	745.273	51.4006	-201.651	755.782	-20.5329	-193.244	732.139	-108.624
401	4	24.059	1170.06	126.811	93.2988	1170.64	175.43	-49.0645	1172.86	161.083	179.519	1000.47	280.634	-127.87	1004.43	297.309	14.3099	971.781	195.735	328.325	719.029	268.006	273.91	737.343	25.0743	206.131	747.285	43.0737	225.719	755.157	-33.8081	219.219	733.156	-118.356	-254.48	708.959	294.157	-241.979	729.798	37.0325	-173.982	745.575	51.4346	-201.782	755.862	-20.4694	-193.312	732.167	-108.598
402	4.01	23.99	1170.03	126.895	93.2505	1170.59	175.442	-49.1044	1172.88	161.141	179.464	1000.52	280.643	-127.918	1004.37	297.237	14.2071	971.74	195.82	328.231	719.057	267.962	273.938	737.386	25.0326	206.057	747.183	43.0335	225.853	755.423	-34.0624	219.136	733.111	-118.391	-254.56	709.175	294.146	-241.997	729.892	36.9566	-174.096	745.874	51.455	-201.914	755.965	-20.4403	-193.369	732.164	-108.53
403	4.02	23.9942	1170.03	127.026	93.2241	1170.58	175.502	-49.1202	1172.9	161.19	179.396	1000.58	280.618	-127.963	1004.32	297.164	14.1535	971.692	195.876	328.189	719.142	267.97	274.067	737.499	25.081	206.018	747.124	43.0139	226.295	756.032	-34.5077	219.082	733.087	-118.419	-254.63	709.409	294.137	-241.98	729.992	36.8915	-174.156	746.169	51.4902	-202.036	756.132	-20.3617	-193.384	732.172	-108.403
404	4.03	24.022	1170.05	127.174	93.2125	1170.59	175.641	-49.1278	1172.91	161.26	179.34	1000.68	280.621	-127.992	1004.29	297.103	14.1197	971.689	195.889	328.232	719.299	267.983	273.863	737.191	25.4224	206.059	747.092	43.0647	226.183	755.847	-34.3532	219.069	733.088	-118.4	-254.703	709.687	294.216	-241.916	730.119	36.8705	-174.165	746.473	51.5359	-202.128	756.378	-20.2648	-193.338	732.194	-108.25
405	4.04	24.0603	1170.14	127.241	93.2159	1170.63	175.732	-49.0899	1172.96	161.261	179.285	1000.79	280.56	-128.004	1004.29	297.025	14.1228	971.737	195.768	328.364	719.494	267.937	273.338	736.521	26.0707	206.112	747.071	43.0419	225.734	755.181	-33.8944	219.089	733.138	-118.417	-254.76	710.024	294.324	-241.814	730.286	36.8542	-174.129	746.768	51.5805	-202.152	756.618	-20.1272	-193.189	732.255	-108.134
406	4.05	24.1015	1170.25	127.253	93.2024	1170.7	175.787	-49.0688	1173.05	161.209	179.203	1000.91	280.525	-128.033	1004.31	296.916	14.1242	971.801	195.621	328.541	719.754	267.906	273.252	736.394	26.1907	206.157	747.086	42.9876	225.653	755.019	-33.7691	219.12	733.187	-118.426	-254.813	710.394	294.435	-241.695	730.515	36.7757	-174.104	747.077	51.6533	-202.127	756.845	-20.0555	-192.929	732.372	-108.025
407	4.06	24.1102	1170.31	127.349	93.1672	1170.76	175.902	-49.1171	1173.1	161.237	179.106	1001.03	280.56	-128.066	1004.34	296.85	14.0999	971.783	195.65	328.744	720.083	267.93	273.271	736.386	26.2514	206.19	747.092	43.0025	225.651	754.982	-33.6824	219.15	733.199	-118.39	-254.902	710.763	294.554	-241.586	730.807	36.7616	-174.135	747.407	51.848	-202.14	757.085	-19.9874	-192.602	732.487	-107.881
408	4.07	24.0867	1170.37	127.51	93.0923	1170.8	175.994	-49.1968	1173.13	161.279	178.995	1001.13	280.58	-128.107	1004.36	296.789	14.0229	971.715	195.694	328.966	720.456	267.974	273.298	736.377	26.3183	206.212	747.05	43.0561	225.686	754.955	-33.606	219.155	733.167	-118.299	-255.006	711.131	294.668	-241.509	731.142	36.7664	-174.192	747.807	52.1203	-202.17	757.359	-19.9145	-192.264	732.623	-107.668
409	4.08	24.0165	1170.44	127.587	93.0288	1170.84	176.058	-49.2812	1173.14	161.31	178.881	1001.22	280.551	-128.148	1004.41	296.661	13.9223	971.654	195.635	329.191	720.784	267.977	273.584	736.674	26.0101	206.244	747.011	43.0813	225.907	755.28	-33.8323	219.133	733.137	-118.276	-255.086	711.46	294.776	-241.239	731.336	37.1442	-174.319	748.39	52.3019	-202.294	757.936	-20.0981	-191.994	733.018	-107.676
410	4.09	23.944	1170.49	127.635	92.9729	1170.87	176.14	-49.3618	1173.16	161.297	178.785	1001.32	280.542	-128.182	1004.45	296.526	13.847	971.595	195.582	329.414	721.056	267.91	274.191	737.354	25.2984	206.275	746.985	43.0979	226.405	755.976	-34.3103	219.098	733.086	-118.241	-255.118	711.808	294.938	-240.772	731.314	38.0246	-174.548	749.244	52.4412	-202.591	758.981	-20.5622	-191.856	733.765	-107.981
411	4.1	23.8874	1170.55	127.684	92.9045	1170.91	176.236	-49.4225	1173.19	161.283	178.687	1001.41	280.497	-128.199	1004.54	296.434	13.7975	971.569	195.5	329.624	721.312	267.807	274.385	737.517	25.151	206.318	746.986	43.1611	226.548	756.142	-34.3666	219.09	733.063	-118.157	-255.111	712.176	295.177	-240.737	731.673	38.2495	-174.897	750.489	52.7082	-203.05	759.918	-20.4261	-191.732	734.486	-107.891
412	4.11	23.848	1170.69	127.613	92.8593	1171	176.257	-49.4819	1173.26	161.235	178.595	1001.53	280.445	-128.218	1004.67	296.305	13.7682	971.595	195.281	329.823	721.557	267.767	274.221	737.253	25.4234	206.395	747.019	43.1972	226.361	755.897	-34.1706	219.118	733.081	-118.104	-255.054	712.542	295.42	-240.726	732.032	38.4237	-175.41	752.604	52.9836	-203.792	760.976	-20.1338	-191.801	735.409	-107.68
[truncated: 326 more rows]

## Sheet: Trial02
PathFileType	4	(X/Y/Z)	Trial02.trc
[truncated: 733 more rows]

[truncated: 3 more sheets: Trial03, Trial04, Trial05]
