# Supplementary material for: Upper-Limb Kinematic Variables are correlated with Fugl-Meyer Assessment Sub Scales During a Hand-to-Mouth Functional Task in Post-Stroke Individuals
Source: Research Square preprint supplement (doi:10.21203/rs.3.rs-8270137/v1), 2025-12-16
Supplement: Supplementary file 10 [file Additional file 12.xls]

## Sheet: Static
PathFileType	4	(X/Y/Z)	Static.trc
DataRate	CameraRate	NumFrames	NumMarkers	Units	OrigDataRate	OrigDataStartFrame	OrigNumFrames
100	100	647	17	mm	100	1	647
Frame#	Time	nasion			r zyg pr			l zyg pr			r should			l should			sternum			r elbow			r ulna			r radius			r hand			r finger			l elbow			l ulna			l radius			l hand			l finger
		X1	Y1	Z1	X2	Y2	Z2	X3	Y3	Z3	X4	Y4	Z4	X5	Y5	Z5	X6	Y6	Z6	X7	Y7	Z7	X8	Y8	Z8	X9	Y9	Z9	X10	Y10	Z10	X11	Y11	Z11	X12	Y12	Z12	X13	Y13	Z13	X14	Y14	Z14	X15	Y15	Z15	X16	Y16	Z16
1	0	67.9987	1199.59	608.297	137.215	1194.51	658.16	-6.57777	1180.78	646.068	202.925	1033.86	774.668	-100.84	1018.99	732.41	71.043	973.025	647.719	319.402	690.56	717.581	337.995	740.679	439.034	255.181	753.53	447.052	275.406	756.358	353.796	242.141	736.21	267.266	-206.807	662.774	702.633	-169.749	735.824	431.453	-88.8384	756.838	442.455	-102.387	764.689	343.817	-66.3892	734.198	257.75
2	0.01	67.976	1199.58	608.246	137.176	1194.51	658.13	-6.57806	1180.77	646.012	202.92	1033.87	774.68	-100.855	1019	732.367	70.9941	973.033	647.628	319.396	690.586	717.575	337.939	740.705	438.997	255.148	753.525	447.029	275.388	756.367	353.797	242.085	736.226	267.18	-206.808	662.81	702.676	-169.747	735.797	431.445	-88.8347	756.846	442.417	-102.391	764.721	343.768	-66.4205	734.222	257.736
3	0.02	67.9298	1199.62	608.187	137.147	1194.54	658.108	-6.58101	1180.79	645.99	202.914	1033.89	774.69	-100.878	1019.04	732.349	70.9608	973.088	647.57	319.392	690.62	717.603	337.892	740.763	438.961	255.118	753.536	447.052	275.375	756.397	353.808	242.032	736.279	267.118	-206.789	662.825	702.7	-169.745	735.801	431.45	-88.8509	756.849	442.419	-102.404	764.755	343.782	-66.4943	734.274	257.669
4	0.03	67.9004	1199.65	608.144	137.129	1194.56	658.094	-6.60088	1180.81	646.014	202.906	1033.91	774.681	-100.897	1019.07	732.329	70.9342	973.132	647.515	319.408	690.632	717.623	337.863	740.801	438.934	255.084	753.542	447.063	275.363	756.411	353.798	242.005	736.307	267.102	-206.8	662.858	702.754	-169.753	735.815	431.456	-88.8583	756.864	442.451	-102.425	764.774	343.811	-66.5333	734.321	257.629
5	0.04	67.9048	1199.66	608.141	137.144	1194.57	658.118	-6.59893	1180.81	646.019	202.923	1033.91	774.679	-100.89	1019.07	732.338	70.9468	973.146	647.495	319.413	690.621	717.633	337.863	740.803	438.909	255.087	753.543	447.06	275.37	756.405	353.818	242.018	736.299	267.118	-206.796	662.861	702.767	-169.75	735.821	431.45	-88.857	756.865	442.447	-102.434	764.767	343.805	-66.5297	734.34	257.63
6	0.05	67.9201	1199.66	608.145	137.17	1194.57	658.127	-6.58597	1180.81	646.023	202.961	1033.9	774.686	-100.856	1019.03	732.356	70.9731	973.146	647.514	319.426	690.589	717.621	337.904	740.779	438.952	255.101	753.559	447.05	275.396	756.393	353.846	242.062	736.273	267.142	-206.794	662.809	702.72	-169.755	735.83	431.491	-88.8581	756.876	442.431	-102.421	764.748	343.841	-66.4947	734.324	257.667
7	0.06	67.9706	1199.65	608.169	137.202	1194.55	658.15	-6.57245	1180.82	646.03	202.994	1033.88	774.656	-100.813	1019	732.375	71.0179	973.123	647.539	319.421	690.544	717.59	337.964	740.735	439	255.137	753.574	447.049	275.419	756.368	353.857	242.126	736.233	267.19	-206.816	662.793	702.705	-169.75	735.833	431.493	-88.832	756.873	442.429	-102.389	764.741	343.826	-66.4488	734.293	257.711
8	0.07	68.016	1199.64	608.178	137.238	1194.55	658.139	-6.5462	1180.82	645.994	203.022	1033.88	774.628	-100.778	1019	732.376	71.0708	973.082	647.508	319.414	690.542	717.579	338.006	740.709	439.03	255.166	753.571	447.032	275.433	756.363	353.835	242.176	736.219	267.215	-206.815	662.806	702.671	-169.716	735.841	431.439	-88.7864	756.87	442.417	-102.367	764.731	343.77	-66.3976	734.277	257.715
9	0.08	68.018	1199.62	608.242	137.257	1194.55	658.144	-6.52524	1180.82	645.979	203.034	1033.88	774.607	-100.76	1019.01	732.373	71.084	973.049	647.532	319.421	690.546	717.55	338.014	740.712	439.019	255.171	753.563	447.055	275.454	756.373	353.85	242.183	736.231	267.212	-206.797	662.83	702.681	-169.697	735.852	431.43	-88.7701	756.867	442.41	-102.367	764.734	343.764	-66.3916	734.262	257.74
10	0.09	68.0045	1199.62	608.256	137.24	1194.56	658.143	-6.54306	1180.81	645.992	203.022	1033.88	774.602	-100.786	1019.05	732.377	71.0741	973.017	647.584	319.423	690.57	717.543	337.986	740.738	438.996	255.149	753.552	447.063	275.439	756.38	353.835	242.144	736.249	267.176	-206.793	662.849	702.711	-169.708	735.854	431.457	-88.7886	756.868	442.415	-102.384	764.743	343.77	-66.3964	734.251	257.788
11	0.1	67.9884	1199.63	608.239	137.214	1194.57	658.103	-6.55933	1180.82	646.005	202.998	1033.88	774.587	-100.831	1019.07	732.365	71.053	973.022	647.542	319.416	690.565	717.565	337.947	740.762	438.99	255.136	753.529	447.061	275.415	756.373	353.801	242.103	736.269	267.154	-206.821	662.879	702.826	-169.727	735.83	431.489	-88.7973	756.855	442.429	-102.393	764.741	343.8	-66.4213	734.265	257.758
12	0.11	67.9931	1199.63	608.215	137.216	1194.56	658.097	-6.54685	1180.82	646.016	202.998	1033.88	774.574	-100.846	1019.06	732.364	71.0388	973.015	647.559	319.411	690.546	717.573	337.923	740.769	438.991	255.126	753.517	447.077	275.409	756.38	353.82	242.092	736.276	267.176	-206.781	662.838	702.764	-169.728	735.819	431.494	-88.793	756.861	442.405	-102.395	764.725	343.825	-66.4411	734.271	257.753
13	0.12	68.0068	1199.64	608.194	137.226	1194.54	658.084	-6.52777	1180.84	646.01	203.014	1033.88	774.574	-100.842	1019.07	732.37	71.0303	973.029	647.511	319.418	690.539	717.59	337.915	740.763	438.996	255.142	753.521	447.093	275.414	756.387	353.846	242.095	736.272	267.17	-206.752	662.838	702.719	-169.712	735.817	431.491	-88.7892	756.856	442.417	-102.392	764.741	343.85	-66.4402	734.281	257.727
14	0.13	68.0346	1199.64	608.138	137.251	1194.54	658.05	-6.50778	1180.84	645.969	203.017	1033.89	774.55	-100.839	1019.08	732.336	71.0074	973.063	647.457	319.436	690.532	717.575	337.926	740.753	438.992	255.17	753.526	447.115	275.427	756.389	353.845	242.108	736.268	267.154	-206.73	662.873	702.706	-169.701	735.835	431.455	-88.7888	756.872	442.391	-102.382	764.773	343.827	-66.4341	734.292	257.712
15	0.14	68.0416	1199.65	608.107	137.277	1194.53	658.011	-6.49998	1180.85	645.93	203.019	1033.89	774.543	-100.836	1019.09	732.314	71.0048	973.074	647.44	319.449	690.53	717.54	337.922	740.763	438.964	255.166	753.538	447.102	275.435	756.395	353.846	242.127	736.273	267.165	-206.684	662.822	702.592	-169.698	735.856	431.434	-88.7936	756.894	442.386	-102.384	764.781	343.8	-66.4356	734.292	257.724
16	0.15	68.025	1199.63	608.077	137.272	1194.5	658.002	-6.51253	1180.85	645.945	203.012	1033.88	774.557	-100.855	1019.08	732.333	70.9892	973.042	647.451	319.438	690.517	717.559	337.921	740.76	438.975	255.125	753.518	447.098	275.425	756.386	353.851	242.121	736.268	267.178	-206.695	662.787	702.579	-169.716	735.837	431.43	-88.8123	756.888	442.415	-102.389	764.758	343.797	-66.4514	734.279	257.711
17	0.16	68	1199.59	608.102	137.26	1194.45	658.013	-6.53114	1180.82	645.97	202.992	1033.86	774.583	-100.876	1019.04	732.371	70.9685	972.993	647.487	319.418	690.498	717.58	337.902	740.737	439.002	255.083	753.5	447.089	275.406	756.363	353.839	242.098	736.247	267.174	-206.746	662.789	702.672	-169.739	735.808	431.462	-88.8475	756.862	442.4	-102.412	764.721	343.818	-66.4694	734.269	257.715
18	0.17	67.9823	1199.55	608.125	137.236	1194.43	658.008	-6.54593	1180.8	645.965	202.977	1033.85	774.617	-100.901	1019.02	732.394	70.9525	972.961	647.522	319.411	690.487	717.58	337.896	740.714	439.022	255.063	753.493	447.055	275.392	756.337	353.816	242.088	736.216	267.178	-206.774	662.781	702.7	-169.759	735.782	431.461	-88.8802	756.846	442.406	-102.44	764.702	343.817	-66.4727	734.248	257.722
19	0.18	67.9957	1199.51	608.167	137.226	1194.42	658.006	-6.55781	1180.79	645.951	202.964	1033.86	774.611	-100.91	1019.02	732.385	70.9391	972.927	647.592	319.407	690.519	717.58	337.891	740.709	439.021	255.055	753.483	447.057	275.388	756.332	353.808	242.091	736.199	267.2	-206.747	662.742	702.591	-169.784	735.77	431.42	-88.8713	756.83	442.423	-102.448	764.705	343.805	-66.4858	734.233	257.719
20	0.19	68.0121	1199.51	608.161	137.233	1194.42	658.02	-6.54431	1180.79	645.932	202.949	1033.88	774.631	-100.899	1019.02	732.386	70.9675	972.912	647.667	319.394	690.58	717.596	337.903	740.727	438.998	255.065	753.494	447.088	275.382	756.341	353.809	242.094	736.217	267.187	-206.771	662.789	702.62	-169.784	735.788	431.45	-88.8562	756.832	442.476	-102.444	764.719	343.809	-66.4769	734.228	257.73
21	0.2	68.0441	1199.54	608.146	137.237	1194.45	658.029	-6.52225	1180.8	645.921	202.955	1033.9	774.657	-100.896	1019.03	732.375	70.9999	972.923	647.652	319.388	690.635	717.617	337.914	740.753	438.981	255.099	753.517	447.112	275.399	756.37	353.801	242.112	736.244	267.145	-206.833	662.867	702.756	-169.758	735.807	431.442	-88.833	756.854	442.467	-102.409	764.735	343.786	-66.4562	734.244	257.729
22	0.21	68.0793	1199.57	608.116	137.249	1194.49	658.037	-6.50434	1180.8	645.895	202.962	1033.91	774.677	-100.885	1019.05	732.375	71.0365	972.946	647.583	319.381	690.65	717.592	337.943	740.779	438.978	255.126	753.547	447.079	275.415	756.411	353.793	242.128	736.288	267.117	-206.881	662.892	702.835	-169.735	735.823	431.416	-88.8064	756.876	442.416	-102.368	764.764	343.786	-66.4219	734.272	257.692
23	0.22	68.0893	1199.6	608.116	137.24	1194.52	658.061	-6.50536	1180.81	645.893	202.948	1033.93	774.687	-100.885	1019.07	732.385	71.0329	973.022	647.477	319.362	690.649	717.583	337.931	740.816	438.984	255.139	753.577	447.066	275.407	756.426	353.794	242.119	736.315	267.093	-206.905	662.893	702.845	-169.717	735.846	431.424	-88.7903	756.89	442.402	-102.365	764.79	343.778	-66.4206	734.319	257.669
24	0.23	68.058	1199.63	608.061	137.23	1194.54	658.098	-6.51636	1180.82	645.919	202.954	1033.95	774.703	-100.895	1019.09	732.414	71.012	973.07	647.467	319.376	690.657	717.607	337.915	740.837	438.966	255.145	753.59	447.099	275.405	756.431	353.808	242.12	736.329	267.107	-206.921	662.924	702.882	-169.718	735.866	431.444	-88.7799	756.908	442.397	-102.368	764.795	343.773	-66.4337	734.36	257.652
25	0.24	68.0316	1199.65	608.083	137.217	1194.56	658.125	-6.53079	1180.82	645.928	202.957	1033.94	774.714	-100.901	1019.07	732.416	71.0079	973.101	647.458	319.403	690.655	717.62	337.924	740.827	438.966	255.142	753.584	447.094	275.427	756.427	353.826	242.132	736.334	267.144	-206.907	662.937	702.888	-169.712	735.866	431.448	-88.774	756.91	442.406	-102.372	764.799	343.772	-66.4268	734.372	257.652
26	0.25	67.9984	1199.62	608.145	137.204	1194.54	658.159	-6.55925	1180.8	645.944	202.96	1033.91	774.713	-100.904	1019.05	732.409	70.9906	973.071	647.48	319.416	690.626	717.578	337.937	740.801	438.984	255.132	753.575	447.074	275.439	756.406	353.831	242.137	736.306	267.161	-206.861	662.859	702.783	-169.719	735.843	431.454	-88.8023	756.893	442.428	-102.372	764.781	343.788	-66.438	734.338	257.677
27	0.26	67.9587	1199.57	608.271	137.175	1194.52	658.179	-6.6039	1180.79	646.011	202.943	1033.89	774.741	-100.92	1019	732.43	70.9707	973.003	647.581	319.429	690.613	717.586	337.938	740.773	439.013	255.112	753.552	447.083	275.43	756.375	353.842	242.134	736.261	267.185	-206.796	662.767	702.677	-169.737	735.805	431.461	-88.8272	756.859	442.473	-102.396	764.739	343.813	-66.4513	734.304	257.712
28	0.27	67.9236	1199.53	608.409	137.148	1194.51	658.225	-6.63474	1180.77	646.076	202.919	1033.86	774.775	-100.93	1018.96	732.456	70.9618	972.95	647.702	319.436	690.614	717.64	337.949	740.741	439.066	255.098	753.519	447.093	275.417	756.35	353.862	242.132	736.219	267.227	-206.725	662.692	702.632	-169.746	735.777	431.482	-88.8375	756.832	442.486	-102.398	764.709	343.81	-66.4381	734.26	257.758
29	0.28	67.8871	1199.55	608.432	137.124	1194.51	658.244	-6.65919	1180.76	646.129	202.907	1033.86	774.784	-100.935	1018.94	732.478	70.9614	972.945	647.748	319.43	690.608	717.635	337.937	740.721	439.054	255.083	753.517	447.111	275.411	756.332	353.856	242.129	736.201	267.237	-206.669	662.634	702.557	-169.742	735.768	431.489	-88.8469	756.816	442.503	-102.403	764.694	343.82	-66.4321	734.228	257.746
30	0.29	67.8614	1199.62	608.4	137.094	1194.55	658.247	-6.68779	1180.81	646.173	202.908	1033.89	774.784	-100.94	1018.97	732.511	70.9548	972.967	647.712	319.436	690.62	717.622	337.91	740.752	439.033	255.079	753.527	447.14	275.401	756.352	353.836	242.106	736.215	267.196	-206.636	662.634	702.51	-169.742	735.803	431.48	-88.8609	756.841	442.48	-102.423	764.721	343.816	-66.4357	734.223	257.769
31	0.3	67.8606	1199.69	608.419	137.079	1194.6	658.281	-6.68931	1180.85	646.173	202.917	1033.92	774.779	-100.942	1019.01	732.516	70.9547	973.028	647.672	319.431	690.661	717.623	337.891	740.783	439.014	255.092	753.537	447.132	275.393	756.38	353.833	242.1	736.268	267.187	-206.639	662.674	702.529	-169.727	735.846	431.442	-88.8491	756.885	442.421	-102.406	764.758	343.796	-66.4357	734.271	257.753
32	0.31	67.8501	1199.73	608.37	137.064	1194.64	658.279	-6.68108	1180.88	646.172	202.914	1033.94	774.775	-100.945	1019.04	732.517	70.9633	973.086	647.609	319.421	690.697	717.634	337.888	740.807	438.952	255.121	753.55	447.1	275.391	756.404	353.819	242.106	736.315	267.147	-206.675	662.749	702.621	-169.708	735.865	431.438	-88.8139	756.898	442.39	-102.382	764.779	343.755	-66.4347	734.297	257.7
33	0.32	67.8264	1199.77	608.329	137.049	1194.66	658.296	-6.69228	1180.87	646.194	202.909	1033.93	774.768	-100.952	1019.04	732.512	70.9491	973.11	647.535	319.416	690.676	717.615	337.882	740.817	438.909	255.133	753.56	447.058	275.399	756.396	353.792	242.105	736.311	267.102	-206.729	662.78	702.732	-169.702	735.86	431.431	-88.7987	756.9	442.366	-102.385	764.774	343.754	-66.4371	734.307	257.686
34	0.33	67.7947	1199.77	608.44	137.037	1194.63	658.338	-6.73898	1180.85	646.266	202.903	1033.92	774.798	-100.955	1019.03	732.546	70.9324	973.086	647.662	319.414	690.643	717.587	337.884	740.806	438.948	255.106	753.541	447.059	275.4	756.373	353.8	242.088	736.268	267.135	-206.711	662.736	702.702	-169.741	735.825	431.451	-88.8267	756.878	442.418	-102.414	764.757	343.805	-66.4511	734.312	257.675
35	0.34	67.7575	1199.74	608.596	137.02	1194.62	658.421	-6.78692	1180.85	646.35	202.888	1033.91	774.823	-100.976	1019.01	732.572	70.9015	973.045	647.781	319.412	690.623	717.572	337.885	740.784	439.006	255.075	753.523	447.086	275.398	756.345	353.853	242.085	736.225	267.219	-206.727	662.758	702.728	-169.776	735.814	431.477	-88.8522	756.853	442.484	-102.445	764.732	343.83	-66.4608	734.276	257.722
36	0.35	67.7411	1199.74	608.662	137.029	1194.61	658.468	-6.79415	1180.86	646.378	202.894	1033.91	774.844	-100.973	1018.99	732.58	70.8777	973.031	647.799	319.418	690.627	717.591	337.899	740.779	439.046	255.063	753.528	447.105	275.39	756.331	353.859	242.098	736.205	267.252	-206.724	662.777	702.734	-169.772	735.817	431.491	-88.8721	756.834	442.529	-102.451	764.734	343.813	-66.4757	734.26	257.718
37	0.36	67.7792	1199.73	608.726	137.041	1194.62	658.478	-6.77324	1180.86	646.357	202.911	1033.91	774.831	-100.946	1018.98	732.581	70.909	973.032	647.827	319.428	690.645	717.566	337.938	740.778	439.024	255.085	753.547	447.112	275.413	756.34	353.85	242.12	736.213	267.224	-206.7	662.762	702.702	-169.754	735.81	431.466	-88.8356	756.836	442.542	-102.426	764.736	343.804	-66.4569	734.26	257.732
38	0.37	67.8191	1199.76	608.691	137.061	1194.65	658.485	-6.74129	1180.86	646.336	202.933	1033.92	774.839	-100.917	1018.98	732.596	70.9584	973.103	647.779	319.436	690.658	717.558	337.967	740.796	438.986	255.121	753.567	447.093	275.428	756.365	353.837	242.158	736.239	267.195	-206.682	662.722	702.673	-169.735	735.812	431.451	-88.7989	756.842	442.478	-102.407	764.738	343.802	-66.4245	734.289	257.732
39	0.38	67.8496	1199.81	608.591	137.065	1194.68	658.505	-6.71268	1180.89	646.333	202.946	1033.94	774.86	-100.907	1019.01	732.605	70.9903	973.171	647.684	319.422	690.691	717.594	337.958	740.846	438.955	255.159	753.598	447.099	275.423	756.398	353.825	242.16	736.294	267.156	-206.682	662.693	702.657	-169.71	735.832	431.474	-88.7833	756.875	442.42	-102.377	764.764	343.767	-66.4121	734.342	257.692
40	0.39	67.8707	1199.85	608.563	137.054	1194.71	658.507	-6.69565	1180.9	646.332	202.934	1033.96	774.858	-100.928	1019.03	732.608	71.0116	973.171	647.685	319.393	690.71	717.599	337.934	740.872	438.943	255.172	753.633	447.074	275.41	756.436	353.794	242.124	736.333	267.131	-206.713	662.711	702.686	-169.7	735.849	431.483	-88.789	756.902	442.391	-102.375	764.792	343.766	-66.4128	734.389	257.655
41	0.4	67.8471	1199.86	608.587	137.04	1194.73	658.537	-6.71795	1180.91	646.365	202.911	1033.96	774.874	-100.945	1019.04	732.626	70.9809	973.148	647.763	319.395	690.724	717.578	337.902	740.879	438.934	255.144	753.636	447.091	275.396	756.442	353.797	242.095	736.345	267.139	-206.748	662.785	702.761	-169.71	735.867	431.469	-88.7999	756.899	442.429	-102.396	764.807	343.765	-66.4229	734.38	257.687
42	0.41	67.8262	1199.81	608.668	137.022	1194.7	658.528	-6.74129	1180.9	646.392	202.9	1033.95	774.886	-100.955	1019.03	732.64	70.9387	973.121	647.803	319.412	690.725	717.572	337.878	740.874	438.934	255.111	753.623	447.092	275.381	756.427	353.792	242.076	736.33	267.136	-206.766	662.838	702.806	-169.721	735.861	431.476	-88.8203	756.887	442.456	-102.408	764.804	343.788	-66.4473	734.342	257.721
43	0.42	67.8162	1199.75	608.675	137.022	1194.65	658.477	-6.74084	1180.86	646.377	202.909	1033.92	774.868	-100.954	1019.01	732.624	70.9191	973.06	647.823	319.42	690.713	717.584	337.88	740.845	438.931	255.092	753.578	447.098	275.375	756.389	353.776	242.076	736.296	267.12	-206.759	662.833	702.793	-169.742	735.836	431.471	-88.8396	756.869	442.436	-102.429	764.775	343.798	-66.4658	734.292	257.723
44	0.43	67.8115	1199.69	608.684	137.014	1194.6	658.469	-6.75172	1180.85	646.382	202.907	1033.88	774.867	-100.958	1018.98	732.61	70.8941	972.995	647.826	319.415	690.659	717.595	337.887	740.797	438.952	255.062	753.547	447.087	275.379	756.356	353.784	242.081	736.257	267.156	-206.766	662.791	702.777	-169.769	735.812	431.451	-88.854	756.825	442.483	-102.44	764.742	343.825	-66.4624	734.266	257.734
45	0.44	67.8184	1199.67	608.676	137.038	1194.57	658.492	-6.75157	1180.84	646.363	202.895	1033.87	774.887	-100.962	1018.97	732.607	70.8953	972.977	647.872	319.418	690.603	717.584	337.894	740.77	439.011	255.051	753.534	447.082	275.389	756.335	353.822	242.09	736.233	267.196	-206.766	662.763	702.754	-169.78	735.805	431.462	-88.8769	756.831	442.508	-102.457	764.726	343.847	-66.4581	734.255	257.734
46	0.45	67.8412	1199.7	608.613	137.058	1194.56	658.453	-6.72962	1180.85	646.298	202.902	1033.86	774.869	-100.952	1018.97	732.616	70.8907	973.008	647.826	319.438	690.571	717.578	337.912	740.752	439.04	255.069	753.55	447.077	275.396	756.331	353.851	242.114	736.214	267.22	-206.772	662.784	702.765	-169.772	735.815	431.447	-88.8712	756.852	442.495	-102.446	764.74	343.818	-66.4286	734.263	257.725
47	0.46	67.8877	1199.72	608.532	137.1	1194.57	658.44	-6.68579	1180.88	646.239	202.911	1033.86	774.85	-100.934	1018.98	732.612	70.9154	973.044	647.706	319.421	690.564	717.571	337.936	740.76	439.037	255.082	753.564	447.072	275.408	756.34	353.853	242.135	736.228	267.217	-206.774	662.781	702.729	-169.764	735.84	431.446	-88.862	756.871	442.442	-102.42	764.762	343.795	-66.3937	734.273	257.741
48	0.47	67.9343	1199.73	608.457	137.121	1194.57	658.402	-6.65934	1180.87	646.18	202.91	1033.88	774.83	-100.929	1019.01	732.601	70.9153	973.087	647.629	319.392	690.567	717.556	337.936	740.788	439.015	255.104	753.575	447.051	275.42	756.357	353.87	242.141	736.258	267.185	-206.756	662.758	702.683	-169.751	735.853	431.419	-88.8397	756.884	442.417	-102.411	764.763	343.796	-66.4117	734.286	257.768
49	0.48	67.945	1199.71	608.423	137.118	1194.58	658.332	-6.64336	1180.86	646.151	202.906	1033.88	774.8	-100.931	1019.02	732.573	70.931	973.108	647.575	319.379	690.577	717.543	337.911	740.819	438.975	255.133	753.569	447.063	275.424	756.382	353.848	242.125	736.278	267.137	-206.776	662.761	702.719	-169.737	735.827	431.412	-88.8143	756.886	442.397	-102.414	764.772	343.777	-66.4233	734.292	257.721
50	0.49	67.9241	1199.67	608.386	137.127	1194.58	658.289	-6.63469	1180.84	646.125	202.904	1033.89	774.792	-100.947	1019.03	732.552	70.9043	973.095	647.578	319.371	690.592	717.543	337.869	740.837	438.927	255.13	753.547	447.055	275.402	756.393	353.813	242.091	736.295	267.123	-206.795	662.777	702.777	-169.738	735.805	431.433	-88.8178	756.878	442.398	-102.41	764.771	343.779	-66.4318	734.295	257.692
51	0.5	67.8985	1199.65	608.361	137.12	1194.55	658.282	-6.66168	1180.82	646.158	202.889	1033.91	774.816	-100.977	1019.04	732.538	70.8888	973.056	647.663	319.358	690.61	717.562	337.845	740.839	438.946	255.101	753.527	447.099	275.371	756.389	353.807	242.063	736.297	267.172	-206.802	662.801	702.802	-169.763	735.814	431.467	-88.843	756.864	442.444	-102.447	764.772	343.813	-66.456	734.304	257.715
52	0.51	67.8858	1199.59	608.456	137.115	1194.52	658.274	-6.67892	1180.81	646.193	202.88	1033.9	774.827	-100.983	1019.03	732.553	70.901	973.009	647.727	319.353	690.616	717.592	337.847	740.818	438.994	255.094	753.535	447.125	275.371	756.379	353.836	242.048	736.28	267.214	-206.817	662.845	702.806	-169.771	735.825	431.495	-88.8696	756.863	442.475	-102.465	764.768	343.836	-66.483	734.307	257.744
53	0.52	67.9222	1199.55	608.421	137.146	1194.5	658.235	-6.64967	1180.78	646.111	202.912	1033.9	774.804	-100.941	1019.01	732.561	70.9333	972.957	647.74	319.371	690.611	717.58	337.906	740.797	439.013	255.108	753.548	447.117	275.401	756.366	353.843	242.093	736.253	267.218	-206.841	662.891	702.885	-169.75	735.838	431.494	-88.8448	756.858	442.481	-102.434	764.743	343.827	-66.4423	734.281	257.771
54	0.53	67.9633	1199.54	608.289	137.196	1194.46	658.18	-6.6105	1180.76	646.045	202.95	1033.89	774.762	-100.879	1018.97	732.533	71.0008	972.899	647.769	319.394	690.586	717.559	337.987	740.754	439.048	255.136	753.573	447.07	275.435	756.366	353.814	242.166	736.24	267.232	-206.799	662.841	702.84	-169.718	735.848	431.452	-88.7981	756.859	442.452	-102.385	764.719	343.813	-66.3858	734.262	257.741
55	0.54	67.9656	1199.54	608.171	137.216	1194.45	658.148	-6.60299	1180.75	645.993	202.969	1033.89	774.749	-100.853	1018.96	732.526	71.0329	972.86	647.791	319.395	690.564	717.547	338.013	740.737	439.072	255.164	753.588	447.05	275.453	756.348	353.825	242.205	736.227	267.253	-206.747	662.755	702.725	-169.714	735.856	431.454	-88.7776	756.867	442.439	-102.366	764.715	343.804	-66.3672	734.264	257.722
56	0.55	67.9605	1199.53	608.121	137.206	1194.45	658.112	-6.61369	1180.76	645.964	202.958	1033.9	774.724	-100.874	1018.98	732.527	71.007	972.924	647.672	319.39	690.571	717.549	338.005	740.759	439.062	255.139	753.607	447.065	275.429	756.349	353.842	242.176	736.23	267.24	-206.725	662.706	702.628	-169.73	735.857	431.455	-88.8046	756.882	442.443	-102.381	764.74	343.777	-66.3915	734.299	257.689
57	0.56	67.9303	1199.53	608.066	137.174	1194.45	658.065	-6.63335	1180.76	645.953	202.936	1033.91	774.706	-100.911	1019	732.503	70.9591	972.965	647.61	319.392	690.594	717.561	337.957	740.801	439.016	255.123	753.62	447.076	275.397	756.373	353.83	242.113	736.251	267.205	-206.725	662.71	702.605	-169.732	735.852	431.463	-88.83	756.891	442.446	-102.405	764.774	343.785	-66.4264	734.323	257.651
58	0.57	67.8811	1199.5	608.038	137.138	1194.45	658.015	-6.65339	1180.74	645.948	202.915	1033.93	774.708	-100.954	1019.02	732.481	70.9126	972.995	647.575	319.402	690.622	717.535	337.905	740.846	438.949	255.098	753.612	447.05	275.379	756.395	353.825	242.056	736.285	267.164	-206.741	662.721	702.637	-169.745	735.832	431.489	-88.8434	756.879	442.462	-102.436	764.795	343.802	-66.4602	734.35	257.634
59	0.58	67.8639	1199.49	608	137.109	1194.45	657.951	-6.66179	1180.72	645.941	202.883	1033.94	774.701	-100.984	1019.03	732.472	70.8906	972.992	647.574	319.397	690.649	717.532	337.866	740.875	438.889	255.083	753.604	447.044	275.367	756.413	353.809	242.015	736.326	267.127	-206.777	662.778	702.751	-169.755	735.806	431.473	-88.862	756.864	442.447	-102.457	764.78	343.835	-66.5031	734.369	257.623
60	0.59	67.8636	1199.48	607.94	137.093	1194.44	657.886	-6.65825	1180.7	645.903	202.872	1033.94	774.686	-100.996	1019.03	732.461	70.8796	972.982	647.524	319.401	690.673	717.548	337.861	740.886	438.87	255.083	753.593	447.043	275.359	756.423	353.776	242.006	736.346	267.102	-206.751	662.752	702.721	-169.753	735.785	431.444	-88.8591	756.862	442.414	-102.442	764.768	343.801	-66.5229	734.365	257.594
61	0.6	67.8626	1199.46	607.884	137.097	1194.43	657.849	-6.64797	1180.7	645.884	202.89	1033.93	774.664	-100.986	1019.03	732.427	70.9054	972.969	647.507	319.418	690.679	717.553	337.863	740.882	438.85	255.102	753.602	447.018	275.363	756.417	353.766	242.015	736.337	267.113	-206.723	662.727	702.691	-169.745	735.798	431.459	-88.8409	756.88	442.39	-102.425	764.775	343.758	-66.4983	734.355	257.618
62	0.61	67.8735	1199.43	607.965	137.109	1194.41	657.882	-6.65246	1180.71	645.892	202.914	1033.93	774.672	-100.953	1019.01	732.433	70.9264	972.935	647.554	319.43	690.658	717.55	337.901	740.837	438.892	255.119	753.611	447.061	275.377	756.38	353.801	242.038	736.282	267.159	-206.715	662.729	702.71	-169.752	735.835	431.487	-88.8361	756.889	442.433	-102.42	764.77	343.781	-66.4534	734.328	257.686
63	0.62	67.8938	1199.43	607.98	137.14	1194.38	657.903	-6.64685	1180.69	645.883	202.932	1033.93	774.68	-100.903	1018.97	732.463	70.9788	972.882	647.652	319.441	690.635	717.573	337.965	740.778	438.988	255.135	753.606	447.082	275.394	756.34	353.815	242.099	736.229	267.22	-206.726	662.749	702.718	-169.757	735.863	431.481	-88.823	756.887	442.472	-102.399	764.744	343.812	-66.4062	734.252	257.767
64	0.63	67.9197	1199.43	607.96	137.175	1194.34	657.903	-6.61561	1180.67	645.822	202.963	1033.91	774.669	-100.858	1018.92	732.446	71.0361	972.824	647.731	319.443	690.619	717.583	338.035	740.721	439.048	255.161	753.605	447.054	275.427	756.308	353.826	242.159	736.198	267.245	-206.727	662.739	702.704	-169.746	735.865	431.455	-88.7928	756.839	442.477	-102.369	764.717	343.785	-66.3699	734.201	257.812
65	0.64	67.9299	1199.41	607.98	137.209	1194.31	657.908	-6.60101	1180.65	645.813	202.97	1033.89	774.657	-100.845	1018.9	732.422	71.0638	972.765	647.781	319.444	690.606	717.56	338.07	740.684	439.067	255.183	753.592	447.052	275.453	756.295	353.842	242.19	736.179	267.248	-206.695	662.711	702.644	-169.742	735.844	431.451	-88.7821	756.812	442.452	-102.356	764.699	343.764	-66.3623	734.204	257.791
66	0.65	67.9056	1199.39	608.031	137.19	1194.32	657.903	-6.64244	1180.66	645.819	202.941	1033.89	774.634	-100.881	1018.92	732.42	71.0149	972.817	647.709	319.435	690.594	717.548	338.023	740.71	439.046	255.169	753.566	447.068	275.441	756.307	353.836	242.173	736.19	267.244	-206.722	662.705	702.684	-169.75	735.813	431.454	-88.8043	756.822	442.428	-102.366	764.705	343.763	-66.388	734.223	257.768
67	0.66	67.8414	1199.43	607.954	137.118	1194.37	657.851	-6.68756	1180.68	645.843	202.889	1033.9	774.64	-100.953	1018.97	732.421	70.9261	972.91	647.595	319.429	690.6	717.553	337.925	740.777	438.972	255.13	753.558	447.095	275.398	756.339	353.813	242.095	736.228	267.225	-206.738	662.697	702.718	-169.771	735.8	431.484	-88.849	756.84	442.424	-102.421	764.735	343.783	-66.4446	734.272	257.7
68	0.67	67.7697	1199.5	607.791	137.058	1194.42	657.811	-6.72269	1180.69	645.863	202.841	1033.94	774.662	-101.018	1019.01	732.407	70.8718	973.005	647.529	319.412	690.615	717.546	337.849	740.839	438.933	255.071	753.592	447.069	275.357	756.378	353.801	242.015	736.291	267.213	-206.724	662.68	702.676	-169.785	735.809	431.519	-88.9041	756.874	442.447	-102.466	764.766	343.822	-66.5129	734.369	257.634
69	0.68	67.7569	1199.53	607.741	137.034	1194.44	657.834	-6.73619	1180.7	645.859	202.819	1033.96	774.667	-101.039	1019.04	732.411	70.8476	973.038	647.475	319.394	690.639	717.533	337.825	740.874	438.92	255.05	753.614	447.049	275.348	756.409	353.804	241.98	736.332	267.181	-206.711	662.655	702.637	-169.78	735.816	431.502	-88.9059	756.897	442.436	-102.473	764.785	343.832	-66.5301	734.419	257.618
70	0.69	67.8065	1199.53	607.815	137.068	1194.45	657.879	-6.70326	1180.7	645.846	202.839	1033.96	774.666	-101.006	1019.04	732.426	70.8827	973.026	647.432	319.386	690.672	717.56	337.857	740.885	438.911	255.107	753.615	447.071	275.367	756.424	353.806	242.012	736.333	267.147	-206.706	662.676	702.643	-169.752	735.814	431.485	-88.8433	756.895	442.423	-102.436	764.794	343.832	-66.4743	734.401	257.643
71	0.7	67.8746	1199.49	607.884	137.106	1194.45	657.906	-6.65573	1180.71	645.84	202.883	1033.96	774.663	-100.942	1019.01	732.441	70.9623	972.989	647.524	319.39	690.702	717.591	337.926	740.865	438.925	255.151	753.626	447.056	275.399	756.426	353.809	242.061	736.313	267.124	-206.721	662.74	702.735	-169.716	735.838	431.464	-88.7835	756.901	442.407	-102.382	764.787	343.78	-66.3993	734.342	257.701
72	0.71	67.9117	1199.44	607.999	137.117	1194.42	657.967	-6.64234	1180.7	645.841	202.905	1033.95	774.671	-100.91	1018.98	732.474	70.9964	972.905	647.673	319.396	690.719	717.619	337.983	740.814	438.996	255.155	753.627	447.06	275.393	756.394	353.792	242.097	736.271	267.179	-206.746	662.778	702.769	-169.699	735.861	431.455	-88.7758	756.906	442.43	-102.357	764.751	343.801	-66.3694	734.288	257.766
73	0.72	67.8811	1199.42	608.062	137.094	1194.38	658.007	-6.67248	1180.7	645.875	202.898	1033.93	774.692	-100.922	1018.94	732.483	70.998	972.827	647.817	319.407	690.704	717.604	337.999	740.762	439.041	255.13	753.609	447.057	275.391	756.349	353.806	242.113	736.214	267.266	-206.762	662.786	702.782	-169.721	735.866	431.466	-88.7959	756.906	442.464	-102.364	764.727	343.814	-66.3816	734.26	257.767
74	0.73	67.8458	1199.4	608.123	137.089	1194.38	658.023	-6.71607	1180.68	645.913	202.881	1033.92	774.73	-100.938	1018.91	732.503	70.9548	972.824	647.845	319.417	690.676	717.574	337.997	740.737	439.036	255.114	753.597	447.061	275.397	756.328	353.825	242.1	736.193	267.287	-206.761	662.774	702.766	-169.742	735.848	431.464	-88.8179	756.893	442.471	-102.371	764.719	343.812	-66.3854	734.24	257.756
75	0.74	67.8154	1199.37	608.209	137.064	1194.38	658.009	-6.72957	1180.66	645.942	202.873	1033.91	774.736	-100.963	1018.91	732.488	70.8931	972.873	647.71	319.422	690.672	717.572	337.983	740.755	439.002	255.11	753.58	447.075	275.4	756.321	353.82	242.077	736.195	267.235	-206.759	662.733	702.747	-169.754	735.814	431.46	-88.8428	756.854	442.468	-102.376	764.715	343.821	-66.4112	734.24	257.748
76	0.75	67.7751	1199.41	608.182	137.027	1194.4	657.994	-6.75351	1180.67	645.985	202.853	1033.9	774.734	-101	1018.94	732.471	70.8469	972.944	647.63	319.411	690.661	717.556	337.944	740.798	438.982	255.102	753.581	447.083	275.389	756.337	353.821	242.049	736.221	267.186	-206.749	662.697	702.683	-169.757	735.782	431.436	-88.8526	756.831	442.455	-102.413	764.722	343.819	-66.4521	734.268	257.74
77	0.76	67.7356	1199.48	608.059	136.994	1194.44	657.981	-6.78093	1180.68	645.996	202.823	1033.91	774.749	-101.024	1018.96	732.461	70.8158	973.003	647.578	319.39	690.648	717.557	337.899	740.85	438.945	255.106	753.598	447.06	275.375	756.36	353.789	242.024	736.253	267.173	-206.743	662.665	702.669	-169.756	735.78	431.43	-88.8526	756.855	442.435	-102.448	764.757	343.796	-66.491	734.318	257.673
78	0.77	67.7124	1199.55	607.968	136.97	1194.49	657.997	-6.78935	1180.71	646.018	202.815	1033.94	774.792	-101.038	1018.99	732.484	70.802	973.071	647.544	319.39	690.659	717.576	337.881	740.886	438.942	255.106	753.62	447.041	275.374	756.387	353.798	242.022	736.288	267.199	-206.703	662.629	702.626	-169.742	735.805	431.447	-88.8615	756.875	442.446	-102.445	764.785	343.799	-66.4913	734.353	257.653
79	0.78	67.718	1199.61	607.961	136.963	1194.51	658.055	-6.7827	1180.74	646.052	202.82	1033.96	774.834	-101.026	1019	732.541	70.8273	973.094	647.557	319.38	690.683	717.599	337.872	740.905	438.949	255.113	753.644	447.038	275.373	756.399	353.821	242.026	736.315	267.208	-206.697	662.652	702.64	-169.733	735.844	431.473	-88.8516	756.895	442.438	-102.43	764.796	343.82	-66.4554	734.357	257.682
80	0.79	67.7393	1199.59	608.099	136.983	1194.53	658.123	-6.77061	1180.75	646.028	202.832	1033.96	774.804	-100.999	1018.99	732.565	70.8662	973.075	647.522	319.362	690.697	717.601	337.904	740.885	438.968	255.145	753.636	447.065	275.391	756.392	353.818	242.033	736.316	267.179	-206.697	662.657	702.656	-169.722	735.864	431.463	-88.832	756.899	442.424	-102.414	764.79	343.804	-66.4292	734.355	257.682
81	0.8	67.7788	1199.56	608.17	137.004	1194.52	658.138	-6.75456	1180.76	646.032	202.854	1033.95	774.775	-100.964	1018.96	732.561	70.9086	973.02	647.639	319.37	690.679	717.553	337.968	740.848	438.99	255.177	753.63	447.079	275.409	756.385	353.806	242.072	736.286	267.177	-206.676	662.633	702.611	-169.705	735.863	431.435	-88.8001	756.897	442.413	-102.373	764.761	343.75	-66.3874	734.32	257.721
82	0.81	67.7791	1199.54	608.211	137.009	1194.49	658.164	-6.75399	1180.74	646.071	202.862	1033.93	774.77	-100.947	1018.92	732.576	70.9092	972.943	647.772	319.396	690.667	717.532	337.999	740.804	438.986	255.187	753.616	447.084	275.418	756.358	353.816	242.105	736.237	267.227	-206.671	662.637	702.626	-169.7	735.84	431.459	-88.7957	756.885	442.414	-102.353	764.72	343.775	-66.36	734.276	257.757
83	0.82	67.7137	1199.49	608.345	136.993	1194.48	658.209	-6.807	1180.71	646.149	202.853	1033.91	774.799	-100.967	1018.9	732.625	70.8578	972.896	647.834	319.419	690.659	717.557	337.981	740.779	439.003	255.161	753.572	447.108	275.412	756.331	353.829	242.086	736.198	267.262	-206.681	662.677	702.709	-169.724	735.805	431.486	-88.8217	756.852	442.457	-102.382	764.706	343.817	-66.3938	734.244	257.759
84	0.83	67.6404	1199.48	608.425	136.947	1194.48	658.258	-6.88363	1180.7	646.257	202.822	1033.89	774.822	-101.001	1018.9	732.648	70.787	972.89	647.867	319.42	690.639	717.556	337.936	740.78	439.026	255.103	753.555	447.127	275.398	756.318	353.857	242.035	736.173	267.268	-206.657	662.633	702.668	-169.755	735.789	431.522	-88.8662	756.835	442.507	-102.451	764.712	343.859	-66.4459	734.26	257.751
85	0.84	67.593	1199.51	608.433	136.921	1194.49	658.286	-6.91034	1180.71	646.28	202.804	1033.89	774.822	-101.02	1018.9	732.623	70.7644	972.927	647.869	319.409	690.634	717.566	337.913	740.805	438.999	255.077	753.56	447.1	275.389	756.323	353.864	242.008	736.19	267.275	-206.648	662.588	702.621	-169.781	735.783	431.529	-88.8874	756.839	442.511	-102.46	764.725	343.857	-66.4651	734.279	257.756
86	0.85	67.5931	1199.55	608.418	136.915	1194.52	658.264	-6.89965	1180.73	646.273	202.811	1033.9	774.803	-101.012	1018.92	732.626	70.7956	972.978	647.848	319.401	690.665	717.58	337.933	740.822	439.002	255.105	753.576	447.091	275.393	756.345	353.844	242.02	736.227	267.248	-206.604	662.538	702.523	-169.771	735.793	431.517	-88.8677	756.849	442.509	-102.448	764.743	343.867	-66.4548	734.287	257.759
87	0.86	67.6109	1199.59	608.32	136.913	1194.54	658.261	-6.86592	1180.75	646.262	202.834	1033.93	774.814	-100.997	1018.95	732.651	70.8336	973.03	647.76	319.389	690.69	717.598	337.951	740.86	438.973	255.142	753.613	447.078	275.408	756.387	353.844	242.041	736.268	267.202	-206.575	662.519	702.488	-169.73	735.814	431.497	-88.817	756.863	442.471	-102.413	764.753	343.862	-66.4379	734.31	257.761
88	0.87	67.6326	1199.68	608.163	136.912	1194.59	658.26	-6.84891	1180.77	646.207	202.832	1033.97	774.804	-101.006	1018.98	732.64	70.8352	973.086	647.651	319.364	690.708	717.585	337.952	740.886	438.927	255.186	753.643	447.067	275.408	756.433	353.83	242.047	736.322	267.166	-206.591	662.552	702.529	-169.708	735.846	431.459	-88.7954	756.888	442.427	-102.379	764.774	343.824	-66.423	734.359	257.715
89	0.88	67.6198	1199.71	608.107	136.887	1194.62	658.224	-6.86182	1180.79	646.181	202.814	1033.98	774.786	-101.037	1018.99	732.633	70.8133	973.136	647.564	319.353	690.727	717.567	337.919	740.912	438.883	255.189	753.663	447.075	275.378	756.446	353.778	242.013	736.345	267.114	-206.587	662.56	702.534	-169.7	735.863	431.453	-88.8086	756.906	442.381	-102.382	764.784	343.78	-66.436	734.385	257.655
90	0.89	67.5947	1199.68	608.193	136.856	1194.61	658.215	-6.87458	1180.79	646.252	202.8	1033.97	774.804	-101.057	1019	732.659	70.7796	973.106	647.597	319.358	690.74	717.578	337.899	740.907	438.891	255.147	753.655	447.069	275.356	756.422	353.77	241.987	736.328	267.12	-206.61	662.617	702.63	-169.717	735.855	431.483	-88.8239	756.907	442.411	-102.397	764.775	343.801	-66.4687	734.369	257.634
91	0.9	67.5891	1199.61	608.323	136.857	1194.58	658.246	-6.89633	1180.77	646.289	202.787	1033.95	774.83	-101.055	1018.98	732.671	70.7659	973.012	647.745	319.378	690.731	717.578	337.904	740.876	438.918	255.105	753.616	447.079	275.359	756.394	353.807	241.979	736.281	267.147	-206.601	662.609	702.594	-169.746	735.835	431.496	-88.8379	756.878	442.47	-102.402	764.73	343.842	-66.4775	734.317	257.673
92	0.91	67.5909	1199.56	608.422	136.877	1194.54	658.255	-6.91039	1180.74	646.314	202.797	1033.92	774.807	-101.032	1018.93	732.659	70.7578	972.952	647.789	319.393	690.694	717.556	337.933	740.829	438.948	255.099	753.584	447.085	275.366	756.357	353.784	241.997	736.228	267.167	-206.611	662.588	702.561	-169.763	735.812	431.493	-88.8613	756.855	442.475	-102.421	764.722	343.832	-66.4554	734.27	257.725
93	0.92	67.6163	1199.52	608.473	136.896	1194.51	658.254	-6.8996	1180.73	646.266	202.812	1033.9	774.804	-101	1018.88	732.659	70.7912	972.896	647.845	319.404	690.661	717.548	337.976	740.773	439.002	255.116	753.572	447.084	275.391	756.326	353.799	242.036	736.189	267.228	-206.621	662.615	702.599	-169.76	735.791	431.475	-88.8536	756.834	442.478	-102.421	764.707	343.811	-66.4253	734.227	257.761
94	0.93	67.6104	1199.52	608.457	136.916	1194.49	658.278	-6.8831	1180.73	646.258	202.82	1033.9	774.826	-100.994	1018.88	732.668	70.8036	972.92	647.84	319.412	690.637	717.564	337.993	740.759	439.063	255.14	753.582	447.093	275.415	756.31	353.844	242.065	736.169	267.275	-206.619	662.614	702.602	-169.761	735.798	431.492	-88.8417	756.834	442.481	-102.398	764.713	343.81	-66.4185	734.231	257.795
95	0.94	67.6219	1199.58	608.363	136.93	1194.52	658.308	-6.88085	1180.75	646.265	202.815	1033.92	774.852	-100.999	1018.9	732.67	70.7963	973.003	647.73	319.414	690.632	717.592	337.978	740.793	439.051	255.138	753.616	447.087	275.418	756.335	353.872	242.061	736.196	267.289	-206.624	662.573	702.603	-169.757	735.817	431.503	-88.8406	756.853	442.481	-102.392	764.73	343.81	-66.4266	734.279	257.783
96	0.95	67.6435	1199.64	608.242	136.926	1194.55	658.285	-6.8793	1180.76	646.246	202.803	1033.94	774.838	-101.007	1018.93	732.658	70.7913	973.077	647.607	319.396	690.636	717.582	337.955	740.839	438.999	255.158	753.64	447.09	275.418	756.361	353.857	242.048	736.257	267.276	-206.592	662.487	702.482	-169.743	735.829	431.499	-88.8344	756.884	442.464	-102.396	764.758	343.802	-66.4299	734.325	257.728
97	0.96	67.6519	1199.66	608.212	136.916	1194.57	658.243	-6.85872	1180.77	646.212	202.803	1033.93	774.789	-101.017	1018.95	732.656	70.8045	973.085	647.611	319.384	690.638	717.57	337.944	740.872	438.959	255.179	753.64	447.073	275.423	756.382	353.845	242.044	736.293	267.214	-206.577	662.446	702.393	-169.721	735.819	431.493	-88.8217	756.89	442.438	-102.399	764.777	343.792	-66.4144	734.333	257.711
98	0.97	67.6548	1199.63	608.197	136.915	1194.57	658.216	-6.8454	1180.75	646.185	202.805	1033.93	774.785	-101.031	1018.95	732.637	70.8097	973.055	647.654	319.374	690.659	717.568	337.942	740.869	438.951	255.183	753.618	447.058	275.417	756.389	353.819	242.033	736.298	267.188	-206.583	662.463	702.446	-169.711	735.808	431.487	-88.8141	756.879	442.432	-102.404	764.766	343.804	-66.4005	734.327	257.733
99	0.98	67.6464	1199.59	608.201	136.9	1194.54	658.183	-6.85215	1180.73	646.173	202.794	1033.92	774.775	-101.042	1018.93	732.628	70.8076	973.019	647.691	319.363	690.678	717.564	337.915	740.85	438.939	255.176	753.591	447.056	275.394	756.381	353.795	242.016	736.277	267.208	-206.606	662.508	702.526	-169.716	735.801	431.498	-88.8224	756.855	442.423	-102.416	764.762	343.788	-66.4005	734.303	257.753
100	0.99	67.6047	1199.54	608.183	136.876	1194.5	658.144	-6.87285	1180.7	646.159	202.782	1033.91	774.772	-101.056	1018.92	732.611	70.7934	972.952	647.781	319.358	690.693	717.574	337.899	740.831	438.902	255.138	753.573	447.074	275.371	756.372	353.796	241.994	736.246	267.206	-206.615	662.525	702.515	-169.729	735.792	431.487	-88.8599	756.846	442.415	-102.421	764.753	343.811	-66.4273	734.276	257.768
101	1	67.5889	1199.5	608.3	136.862	1194.48	658.143	-6.91108	1180.69	646.185	202.766	1033.91	774.774	-101.063	1018.92	732.609	70.7439	972.942	647.81	319.36	690.69	717.561	337.901	740.823	438.94	255.098	753.579	447.11	275.37	756.367	353.828	241.973	736.247	267.209	-206.655	662.577	702.587	-169.755	735.794	431.511	-88.8854	756.84	442.485	-102.451	764.745	343.87	-66.465	734.29	257.731
102	1.01	67.59	1199.49	608.356	136.871	1194.49	658.135	-6.9227	1180.7	646.198	202.773	1033.92	774.771	-101.047	1018.91	732.596	70.7287	972.942	647.823	319.376	690.7	717.582	337.924	740.814	438.979	255.108	753.59	447.124	275.376	756.362	353.853	241.989	736.24	267.247	-206.671	662.596	702.637	-169.766	735.804	431.508	-88.887	756.852	442.506	-102.465	764.75	343.89	-66.4609	734.301	257.726
103	1.02	67.6022	1199.49	608.228	136.889	1194.49	658.083	-6.89177	1180.7	646.12	202.806	1033.92	774.753	-101.008	1018.89	732.578	70.7628	972.932	647.733	319.368	690.687	717.584	337.971	740.808	438.963	255.133	753.599	447.07	275.386	756.35	353.828	242.029	736.221	267.266	-206.705	662.635	702.719	-169.756	735.814	431.485	-88.8474	756.866	442.456	-102.43	764.737	343.832	-66.4206	734.289	257.733
104	1.03	67.6406	1199.48	608.165	136.91	1194.46	658.037	-6.85763	1180.68	646.043	202.843	1033.91	774.715	-100.98	1018.88	732.561	70.79	972.958	647.614	319.369	690.673	717.582	338.015	740.802	438.973	255.149	753.61	447.045	275.411	756.346	353.822	242.069	736.208	267.277	-206.693	662.637	702.703	-169.748	735.819	431.43	-88.8216	756.871	442.42	-102.394	764.729	343.794	-66.3976	734.297	257.724
105	1.04	67.6289	1199.49	608.112	136.909	1194.46	658.002	-6.86475	1180.68	646.046	202.836	1033.92	774.7	-100.982	1018.89	732.568	70.8001	972.953	647.638	319.382	690.664	717.575	338.004	740.816	438.974	255.143	753.626	447.053	275.408	756.369	353.819	242.071	736.22	267.275	-206.658	662.577	702.621	-169.75	735.821	431.462	-88.8276	756.868	442.45	-102.4	764.734	343.81	-66.399	734.312	257.712
106	1.05	67.607	1199.47	608.097	136.886	1194.47	657.978	-6.88405	1180.68	646.05	202.817	1033.93	774.699	-101.008	1018.89	732.539	70.7724	972.959	647.645	319.378	690.665	717.557	337.963	740.843	438.941	255.131	753.64	447.056	275.392	756.391	353.801	242.023	736.248	267.217	-206.614	662.499	702.52	-169.754	735.817	431.474	-88.8525	756.852	442.458	-102.419	764.74	343.783	-66.4161	734.323	257.699
107	1.06	67.5861	1199.46	608.055	136.862	1194.48	657.93	-6.89413	1180.66	646.041	202.794	1033.93	774.69	-101.019	1018.9	732.531	70.7537	972.974	647.58	319.373	690.685	717.558	337.927	740.857	438.907	255.125	753.623	447.043	275.372	756.395	353.786	241.988	736.276	267.153	-206.558	662.419	702.402	-169.758	735.811	431.489	-88.8662	756.843	442.445	-102.43	764.74	343.793	-66.4539	734.332	257.68
108	1.07	67.5651	1199.47	608.001	136.849	1194.49	657.909	-6.89595	1180.64	646.053	202.789	1033.94	774.686	-101.048	1018.9	732.554	70.7471	972.98	647.538	319.373	690.704	717.578	337.901	740.871	438.884	255.135	753.602	447.068	275.349	756.407	353.786	241.964	736.299	267.158	-206.527	662.399	702.363	-169.751	735.783	431.509	-88.8521	756.836	442.459	-102.433	764.735	343.845	-66.4874	734.354	257.643
109	1.08	67.57	1199.48	607.967	136.835	1194.48	657.876	-6.88797	1180.62	646.032	202.788	1033.94	774.685	-101.066	1018.91	732.548	70.7397	972.982	647.505	319.383	690.702	717.585	337.881	740.873	438.877	255.15	753.587	447.085	275.351	756.408	353.815	241.961	736.298	267.166	-206.534	662.432	702.453	-169.734	735.765	431.518	-88.8323	756.847	442.433	-102.417	764.736	343.832	-66.4922	734.353	257.635
110	1.09	67.5813	1199.49	607.876	136.848	1194.46	657.841	-6.86618	1180.61	645.967	202.785	1033.94	774.671	-101.061	1018.91	732.537	70.7499	972.999	647.472	319.39	690.693	717.59	337.896	740.869	438.881	255.164	753.6	447.044	275.378	756.396	353.839	241.983	736.292	267.177	-206.521	662.428	702.428	-169.713	735.775	431.498	-88.821	756.865	442.4	-102.407	764.756	343.791	-66.4812	734.347	257.626
111	1.1	67.5753	1199.51	607.85	136.871	1194.45	657.859	-6.86159	1180.63	645.947	202.793	1033.94	774.661	-101.041	1018.9	732.538	70.7593	972.991	647.5	319.414	690.694	717.603	337.928	740.857	438.918	255.171	753.621	447.047	275.396	756.377	353.833	241.998	736.276	267.21	-206.49	662.409	702.38	-169.705	735.788	431.495	-88.8212	756.878	442.391	-102.397	764.772	343.763	-66.4581	734.331	257.661
112	1.11	67.5805	1199.49	607.91	136.887	1194.43	657.885	-6.86862	1180.65	645.956	202.809	1033.96	774.716	-101.01	1018.89	732.564	70.7701	972.981	647.57	319.44	690.693	717.594	337.972	740.825	438.997	255.176	753.616	447.101	275.41	756.362	353.852	242.023	736.244	267.271	-206.524	662.468	702.536	-169.709	735.833	431.538	-88.8314	756.886	442.468	-102.399	764.781	343.8	-66.4123	734.298	257.767
113	1.12	67.616	1199.45	607.965	136.921	1194.41	657.903	-6.85566	1180.65	645.95	202.83	1033.96	774.74	-100.964	1018.85	732.582	70.8185	972.925	647.707	319.456	690.667	717.575	338.03	740.784	439.061	255.192	753.609	447.107	275.427	756.35	353.866	242.067	736.209	267.299	-206.579	662.51	702.691	-169.709	735.85	431.542	-88.8222	756.879	442.512	-102.387	764.756	343.852	-66.3673	734.258	257.828
114	1.13	67.6589	1199.39	607.974	136.94	1194.36	657.891	-6.83684	1180.61	645.878	202.835	1033.92	774.701	-100.946	1018.8	732.537	70.8684	972.849	647.761	319.44	690.641	717.556	338.079	740.732	439.092	255.205	753.596	447.081	275.448	756.326	353.851	242.105	736.187	267.319	-206.597	662.469	702.644	-169.709	735.819	431.521	-88.8016	756.838	442.481	-102.361	764.714	343.821	-66.3343	734.206	257.833
115	1.14	67.6478	1199.35	608.012	136.922	1194.33	657.895	-6.86303	1180.57	645.887	202.821	1033.9	774.694	-100.967	1018.77	732.525	70.8528	972.778	647.77	319.423	690.626	717.535	338.07	740.704	439.094	255.196	753.579	447.069	275.447	756.307	353.858	242.099	736.161	267.332	-206.583	662.432	702.57	-169.726	735.78	431.49	-88.803	756.802	442.501	-102.382	764.685	343.832	-66.3337	734.157	257.85
116	1.15	67.602	1199.33	608.038	136.873	1194.34	657.879	-6.89351	1180.55	645.94	202.791	1033.91	774.697	-101.009	1018.78	732.547	70.8082	972.78	647.838	319.419	690.655	717.545	338.003	740.743	439.021	255.156	753.554	447.072	275.408	756.315	353.85	242.038	736.162	267.302	-206.583	662.445	702.579	-169.755	735.769	431.498	-88.8391	756.792	442.547	-102.417	764.687	343.838	-66.3738	734.164	257.836
117	1.16	67.5276	1199.37	607.985	136.811	1194.38	657.881	-6.9346	1180.58	645.966	202.75	1033.92	774.692	-101.056	1018.82	732.538	70.7424	972.883	647.73	319.408	690.688	717.562	337.921	740.818	438.933	255.124	753.557	447.067	275.362	756.344	353.812	241.96	736.224	267.244	-206.549	662.407	702.487	-169.779	735.767	431.516	-88.8813	756.809	442.512	-102.461	764.716	343.854	-66.4571	734.236	257.761
118	1.17	67.4694	1199.45	607.875	136.761	1194.44	657.862	-6.94814	1180.6	645.963	202.719	1033.94	774.693	-101.091	1018.87	732.521	70.6975	972.962	647.599	319.399	690.711	717.572	337.872	740.867	438.894	255.1	753.588	447.079	275.316	756.383	353.757	241.908	736.298	267.187	-206.511	662.365	702.405	-169.779	735.773	431.48	-88.9009	756.843	442.475	-102.477	764.762	343.864	-66.5274	734.32	257.687
119	1.18	67.4823	1199.49	607.887	136.743	1194.48	657.814	-6.94125	1180.62	645.953	202.735	1033.98	774.709	-101.092	1018.89	732.536	70.7082	973.001	647.541	319.403	690.737	717.613	337.862	740.892	438.893	255.105	753.624	447.079	275.316	756.413	353.77	241.906	736.326	267.161	-206.495	662.366	702.397	-169.758	735.787	431.479	-88.8802	756.87	442.476	-102.453	764.785	343.84	-66.537	734.372	257.642
120	1.19	67.5206	1199.51	607.857	136.787	1194.49	657.838	-6.90992	1180.64	645.958	202.777	1033.99	774.717	-101.051	1018.9	732.549	70.7632	973.017	647.523	319.427	690.747	717.628	337.903	740.898	438.886	255.143	753.653	447.036	275.355	756.41	353.809	241.956	736.323	267.158	-206.529	662.421	702.505	-169.72	735.806	431.484	-88.8262	756.886	442.438	-102.412	764.781	343.839	-66.4725	734.39	257.642
121	1.2	67.5476	1199.53	607.799	136.823	1194.49	657.869	-6.88228	1180.65	645.966	202.809	1033.98	774.704	-101.006	1018.89	732.542	70.7843	973.027	647.457	319.434	690.743	717.625	337.955	740.873	438.893	255.176	753.658	447.011	275.389	756.398	353.81	241.999	736.304	267.174	-206.534	662.443	702.516	-169.688	735.831	431.45	-88.8	756.899	442.389	-102.377	764.774	343.829	-66.4213	734.383	257.646
122	1.21	67.5367	1199.52	607.933	136.822	1194.48	657.909	-6.9013	1180.66	646.001	202.821	1033.98	774.7	-100.982	1018.86	732.547	70.7924	972.987	647.562	319.44	690.74	717.611	337.98	740.855	438.936	255.174	753.651	447.022	275.387	756.39	353.815	242.007	736.276	267.215	-206.488	662.393	702.41	-169.7	735.848	431.477	-88.8143	756.9	442.409	-102.378	764.777	343.828	-66.429	734.365	257.694
123	1.22	67.5075	1199.47	608.107	136.828	1194.47	657.951	-6.93167	1180.65	646.038	202.829	1033.96	774.72	-100.974	1018.83	732.597	70.7867	972.921	647.664	319.452	690.722	717.593	337.997	740.829	438.992	255.145	753.635	447.039	275.385	756.372	353.813	242.015	736.245	267.266	-206.484	662.383	702.418	-169.727	735.836	431.502	-88.8361	756.889	442.471	-102.398	764.758	343.835	-66.4367	734.319	257.744
124	1.23	67.5014	1199.42	608.16	136.822	1194.45	657.948	-6.94162	1180.61	646.023	202.825	1033.93	774.692	-100.963	1018.79	732.599	70.805	972.833	647.774	319.462	690.695	717.581	338.019	740.793	438.988	255.148	753.602	447.032	275.402	756.345	353.81	242.029	736.208	267.246	-206.488	662.359	702.404	-169.739	735.79	431.514	-88.8188	756.856	442.444	-102.395	764.708	343.824	-66.4109	734.263	257.762
125	1.24	67.5136	1199.38	608.235	136.817	1194.43	657.966	-6.95837	1180.58	646.04	202.821	1033.89	774.679	-100.966	1018.76	732.592	70.8167	972.754	647.854	319.455	690.664	717.558	338.026	740.757	439.001	255.16	753.559	447.057	275.4	756.318	353.813	242.039	736.18	267.259	-206.483	662.307	702.349	-169.745	735.755	431.52	-88.8142	756.824	442.439	-102.398	764.665	343.832	-66.4053	734.215	257.762
126	1.25	67.4888	1199.39	608.254	136.816	1194.45	658.022	-6.98031	1180.59	646.098	202.804	1033.89	774.69	-100.991	1018.76	732.606	70.7962	972.76	647.882	319.437	690.661	717.571	338.01	740.76	439.033	255.156	753.533	447.084	275.388	756.314	353.811	242.025	736.185	267.296	-206.451	662.237	702.255	-169.762	735.737	431.527	-88.8346	756.796	442.49	-102.414	764.657	343.837	-66.404	734.206	257.8
127	1.26	67.4706	1199.46	608.215	136.782	1194.48	658.014	-6.98167	1180.63	646.181	202.789	1033.91	774.709	-101.014	1018.79	732.582	70.7715	972.855	647.756	319.415	690.662	717.563	337.98	740.802	439.013	255.149	753.563	447.09	275.386	756.348	353.829	241.992	736.231	267.271	-206.421	662.188	702.161	-169.76	735.758	431.549	-88.8394	756.809	442.477	-102.411	764.694	343.831	-66.4148	734.251	257.79
128	1.27	67.4661	1199.57	608.097	136.74	1194.54	657.956	-6.9776	1180.67	646.181	202.786	1033.95	774.689	-101.023	1018.85	732.572	70.749	972.986	647.538	319.409	690.653	717.538	337.952	740.866	438.97	255.156	753.599	447.094	275.391	756.386	353.844	241.979	736.29	267.213	-206.443	662.245	702.214	-169.752	735.804	431.536	-88.8426	756.852	442.457	-102.422	764.747	343.814	-66.4234	734.308	257.759
129	1.28	67.4485	1199.66	607.985	136.734	1194.59	657.917	-6.96882	1180.71	646.148	202.79	1033.98	774.679	-101.036	1018.9	732.573	70.7443	973.047	647.467	319.421	690.665	717.537	337.921	740.9	438.932	255.161	753.615	447.093	275.391	756.418	353.864	241.971	736.342	267.196	-206.484	662.322	702.342	-169.73	735.826	431.526	-88.8419	756.89	442.452	-102.431	764.775	343.834	-66.4342	734.346	257.705
130	1.29	67.4535	1199.7	607.951	136.744	1194.61	657.941	-6.95122	1180.72	646.132	202.798	1033.98	774.671	-101.038	1018.91	732.575	70.7754	973.048	647.489	319.434	690.675	717.568	337.916	740.897	438.935	255.172	753.613	447.079	275.394	756.425	353.877	241.977	736.344	267.194	-206.516	662.384	702.49	-169.707	735.826	431.498	-88.8256	756.892	442.444	-102.417	764.78	343.815	-66.43	734.37	257.7
131	1.3	67.4725	1199.68	607.97	136.77	1194.58	657.987	-6.94281	1180.71	646.138	202.811	1033.94	774.665	-101.02	1018.89	732.579	70.7691	973.005	647.487	319.44	690.647	717.587	337.925	740.854	438.944	255.175	753.591	447.071	275.401	756.392	353.864	241.993	736.294	267.219	-206.525	662.422	702.544	-169.701	735.811	431.48	-88.8119	756.879	442.412	-102.412	764.773	343.792	-66.4146	734.351	257.72
132	1.31	67.4757	1199.61	608.078	136.79	1194.53	658.019	-6.96278	1180.69	646.154	202.817	1033.91	774.658	-100.999	1018.84	732.595	70.7391	972.902	647.602	319.452	690.616	717.555	337.957	740.789	438.982	255.172	753.547	447.092	275.398	756.344	353.846	241.99	736.241	267.225	-206.522	662.419	702.525	-169.731	735.788	431.498	-88.8294	756.857	442.431	-102.431	764.73	343.826	-66.4248	734.292	257.749
133	1.32	67.4722	1199.52	608.28	136.8	1194.49	658.048	-6.99121	1180.67	646.182	202.819	1033.88	774.632	-101.016	1018.8	732.581	70.7119	972.793	647.751	319.463	690.6	717.537	337.988	740.736	439.045	255.135	753.528	447.105	275.379	756.313	353.83	241.99	736.191	267.272	-206.478	662.371	702.418	-169.767	735.775	431.522	-88.862	756.839	442.487	-102.449	764.706	343.84	-66.4391	734.235	257.781
134	1.33	67.4706	1199.47	608.337	136.801	1194.46	658.054	-6.99963	1180.66	646.195	202.815	1033.86	774.601	-101.017	1018.78	732.572	70.717	972.708	647.805	319.453	690.604	717.551	337.998	740.707	439.05	255.106	753.514	447.088	275.365	756.296	353.8	242.007	736.158	267.293	-206.466	662.343	702.361	-169.782	735.762	431.52	-88.8679	756.808	442.534	-102.451	764.663	343.855	-66.4537	734.194	257.801
135	1.34	67.4975	1199.45	608.322	136.818	1194.44	658.021	-6.9824	1180.65	646.159	202.811	1033.85	774.596	-101.015	1018.76	732.547	70.7634	972.664	647.854	319.426	690.601	717.558	337.997	740.696	439.027	255.103	753.499	447.082	275.378	756.305	353.796	242.026	736.154	267.282	-206.448	662.301	702.306	-169.784	735.753	431.525	-88.8487	756.766	442.548	-102.429	764.631	343.856	-66.4446	734.168	257.806
136	1.35	67.522	1199.5	608.249	136.828	1194.46	657.981	-6.95885	1180.66	646.118	202.81	1033.87	774.623	-101.035	1018.79	732.559	70.7706	972.721	647.809	319.407	690.607	717.566	337.998	740.724	439.006	255.132	753.518	447.076	275.388	756.328	353.824	242.04	736.191	267.253	-206.455	662.259	702.264	-169.771	735.753	431.507	-88.8435	756.774	442.537	-102.416	764.658	343.833	-66.4198	734.202	257.791
137	1.36	67.5159	1199.59	608.05	136.831	1194.52	657.964	-6.92843	1180.7	646.08	202.804	1033.92	774.63	-101.051	1018.84	732.543	70.7429	972.852	647.612	319.395	690.637	717.562	337.965	740.79	438.958	255.14	753.564	447.081	275.375	756.365	353.822	242.015	736.247	267.213	-206.466	662.273	702.271	-169.749	735.782	431.489	-88.8384	756.829	442.483	-102.41	764.71	343.829	-66.4148	734.282	257.729
138	1.37	67.5186	1199.67	607.897	136.817	1194.59	657.958	-6.91202	1180.74	646.024	202.785	1033.98	774.646	-101.069	1018.89	732.528	70.7287	972.967	647.462	319.371	690.681	717.574	337.932	740.871	438.918	255.156	753.614	447.066	275.365	756.419	353.815	241.994	736.312	267.178	-206.487	662.309	702.29	-169.728	735.825	431.462	-88.8321	756.883	442.435	-102.411	764.761	343.807	-66.43	734.348	257.676
139	1.38	67.5188	1199.72	607.834	136.803	1194.62	657.936	-6.91413	1180.76	645.987	202.774	1034	774.646	-101.082	1018.93	732.529	70.7443	973.012	647.426	319.358	690.724	717.597	337.917	740.927	438.891	255.167	753.644	447.058	275.374	756.451	353.819	241.988	736.358	267.153	-206.529	662.39	702.383	-169.718	735.834	431.453	-88.8211	756.918	442.409	-102.417	764.79	343.807	-66.4313	734.403	257.645
140	1.39	67.5115	1199.71	607.87	136.79	1194.6	657.907	-6.92654	1180.74	645.987	202.769	1034.01	774.648	-101.081	1018.92	732.511	70.7346	972.99	647.453	319.371	690.728	717.578	337.91	740.919	438.892	255.158	753.629	447.047	275.375	756.438	353.802	241.978	736.359	267.16	-206.562	662.444	702.465	-169.723	735.83	431.473	-88.8217	756.916	442.396	-102.415	764.793	343.796	-66.4403	734.402	257.644
141	1.4	67.4869	1199.64	607.958	136.799	1194.56	657.966	-6.95585	1180.71	646.004	202.771	1033.98	774.654	-101.087	1018.89	732.506	70.7266	972.923	647.54	319.389	690.713	717.579	337.922	740.869	438.908	255.144	753.6	447.054	275.379	756.407	353.815	241.992	736.305	267.2	-206.62	662.493	702.569	-169.736	735.81	431.494	-88.8328	756.901	442.388	-102.421	764.768	343.81	-66.462	734.363	257.655
142	1.41	67.461	1199.54	608.062	136.803	1194.52	658.044	-6.97207	1180.68	646.038	202.765	1033.94	774.659	-101.086	1018.84	732.507	70.7279	972.835	647.658	319.405	690.713	717.594	337.957	740.811	438.97	255.13	753.557	447.091	275.39	756.356	353.84	242.006	736.246	267.263	-206.652	662.509	702.625	-169.759	735.792	431.5	-88.8419	756.865	442.442	-102.428	764.729	343.85	-66.4491	734.28	257.733
143	1.42	67.477	1199.5	608.228	136.81	1194.48	658.094	-6.99846	1180.66	646.076	202.763	1033.91	774.671	-101.058	1018.79	732.524	70.7555	972.736	647.826	319.418	690.691	717.582	338.004	740.759	439.059	255.118	753.54	447.118	275.409	756.328	353.877	242.032	736.191	267.323	-206.627	662.462	702.547	-169.774	735.787	431.524	-88.8568	756.845	442.495	-102.434	764.707	343.876	-66.4315	734.224	257.805
144	1.43	67.5164	1199.48	608.354	136.805	1194.47	658.077	-7.0039	1180.65	646.072	202.775	1033.92	774.671	-101.031	1018.76	732.538	70.7804	972.696	647.865	319.423	690.653	717.547	338.034	740.734	439.077	255.137	753.541	447.119	275.426	756.319	353.872	242.063	736.18	267.327	-206.586	662.381	702.446	-169.761	735.797	431.519	-88.855	756.833	442.52	-102.42	764.696	343.819	-66.3962	734.197	257.831
145	1.44	67.53	1199.53	608.224	136.793	1194.49	658.042	-6.98145	1180.65	646.038	202.784	1033.93	774.659	-101.032	1018.75	732.522	70.8161	972.712	647.747	319.419	690.646	717.543	338.046	740.745	439.06	255.17	753.555	447.091	275.439	756.334	353.838	242.08	736.201	267.306	-206.526	662.273	702.271	-169.737	735.793	431.498	-88.8353	756.83	442.498	-102.406	764.694	343.81	-66.3635	734.215	257.802
146	1.45	67.4981	1199.59	608.109	136.758	1194.54	658.029	-6.99372	1180.66	646.037	202.766	1033.93	774.666	-101.061	1018.77	732.504	70.8013	972.774	647.615	319.403	690.672	717.578	338.016	740.789	439.015	255.181	753.573	447.066	275.423	756.366	353.838	242.05	736.24	267.241	-206.496	662.219	702.227	-169.728	735.778	431.466	-88.8234	756.829	442.456	-102.398	764.713	343.796	-66.3668	734.239	257.775
147	1.46	67.438	1199.63	608.104	136.692	1194.59	658.013	-7.03234	1180.69	646.095	202.725	1033.96	774.665	-101.114	1018.82	732.507	70.7384	972.88	647.494	319.394	690.694	717.592	337.951	740.834	438.973	255.163	753.584	447.089	275.385	756.397	353.826	241.995	736.283	267.201	-206.515	662.244	702.329	-169.745	735.795	431.454	-88.8531	756.845	442.449	-102.416	764.737	343.803	-66.4087	734.287	257.749
148	1.47	67.3753	1199.69	608.05	136.636	1194.62	658.016	-7.06042	1180.71	646.114	202.706	1033.98	774.673	-101.148	1018.84	732.513	70.6845	972.937	647.452	319.411	690.737	717.591	337.89	740.864	438.917	255.147	753.582	447.09	275.356	756.417	353.816	241.956	736.313	267.157	-206.526	662.294	702.407	-169.748	735.794	431.484	-88.8781	756.878	442.428	-102.439	764.761	343.812	-66.4501	734.331	257.711
149	1.48	67.3319	1199.72	608.019	136.607	1194.64	658.013	-7.07481	1180.73	646.137	202.714	1033.99	774.672	-101.16	1018.86	732.507	70.6847	972.935	647.518	319.429	690.752	717.585	337.872	740.887	438.894	255.129	753.58	447.056	275.352	756.42	353.811	241.954	736.332	267.145	-206.508	662.322	702.419	-169.748	735.8	431.508	-88.8786	756.889	442.408	-102.446	764.785	343.791	-66.4858	734.349	257.635
150	1.49	67.3237	1199.69	608.075	136.62	1194.65	658.04	-7.09428	1180.71	646.164	202.719	1033.99	774.681	-101.145	1018.86	732.517	70.6854	972.914	647.514	319.434	690.752	717.571	337.89	740.888	438.911	255.124	753.575	447.057	275.365	756.409	353.842	241.96	736.317	267.164	-206.496	662.339	702.41	-169.753	735.802	431.489	-88.8617	756.88	442.411	-102.444	764.788	343.791	-66.5046	734.337	257.652
151	1.5	67.3131	1199.66	608.131	136.651	1194.64	658.111	-7.09779	1180.7	646.189	202.742	1033.98	774.676	-101.109	1018.83	732.52	70.6997	972.888	647.555	319.44	690.751	717.577	337.918	740.865	438.951	255.132	753.575	447.068	275.382	756.387	353.885	241.984	736.274	267.217	-206.484	662.365	702.44	-169.748	735.8	431.495	-88.8457	756.885	442.426	-102.421	764.783	343.803	-66.4842	734.324	257.702
152	1.51	67.3416	1199.63	608.226	136.681	1194.59	658.145	-7.07404	1180.7	646.221	202.772	1033.96	774.679	-101.079	1018.79	732.533	70.7383	972.815	647.67	319.462	690.73	717.568	337.967	740.816	438.973	255.134	753.572	447.051	275.399	756.354	353.878	242.023	736.219	267.257	-206.487	662.384	702.494	-169.739	735.806	431.513	-88.8268	756.878	442.446	-102.421	764.761	343.797	-66.4424	734.295	257.714
153	1.52	67.3813	1199.61	608.335	136.701	1194.56	658.167	-7.05808	1180.68	646.215	202.792	1033.95	774.682	-101.045	1018.76	732.556	70.782	972.773	647.783	319.461	690.716	717.564	338.02	740.779	439.03	255.14	753.578	447.066	275.4	756.348	353.857	242.055	736.189	267.277	-206.469	662.37	702.474	-169.743	735.84	431.51	-88.8164	756.865	442.464	-102.392	764.727	343.804	-66.4039	734.269	257.758
154	1.53	67.3984	1199.59	608.376	136.7	1194.54	658.172	-7.04284	1180.66	646.218	202.799	1033.95	774.676	-101.026	1018.75	732.594	70.8119	972.752	647.84	319.432	690.72	717.58	338.039	740.774	439.083	255.146	753.592	447.081	275.41	756.351	353.847	242.069	736.209	267.296	-206.489	662.374	702.47	-169.734	735.847	431.497	-88.8042	756.849	442.485	-102.371	764.71	343.801	-66.382	734.273	257.802
155	1.54	67.411	1199.55	608.315	136.685	1194.51	658.168	-7.03466	1180.61	646.234	202.801	1033.94	774.663	-101.039	1018.78	732.609	70.8147	972.748	647.841	319.412	690.732	717.605	338.03	740.785	439.034	255.165	753.591	447.073	275.412	756.372	353.838	242.066	736.243	267.246	-206.488	662.354	702.496	-169.718	735.828	431.485	-88.791	756.845	442.487	-102.364	764.711	343.781	-66.3746	734.273	257.775
156	1.55	67.4021	1199.49	608.225	136.662	1194.48	658.131	-7.03498	1180.57	646.217	202.78	1033.94	774.685	-101.085	1018.81	732.604	70.8026	972.822	647.744	319.403	690.743	717.594	337.995	740.826	438.967	255.168	753.576	447.055	275.398	756.393	353.807	242.037	736.275	267.162	-206.459	662.306	702.437	-169.714	735.799	431.484	-88.7898	756.849	442.414	-102.363	764.726	343.775	-66.3719	734.291	257.756
157	1.56	67.3588	1199.47	608.169	136.615	1194.47	658.076	-7.05897	1180.54	646.242	202.739	1033.96	774.732	-101.13	1018.84	732.626	70.7255	972.898	647.703	319.38	690.741	717.586	337.909	740.879	438.905	255.13	753.58	447.054	275.371	756.414	353.793	241.982	736.329	267.152	-206.425	662.267	702.34	-169.734	735.785	431.496	-88.8337	756.86	442.435	-102.393	764.744	343.839	-66.4303	734.34	257.693
158	1.57	67.3168	1199.49	608.097	136.571	1194.47	658.032	-7.09078	1180.53	646.264	202.703	1033.98	774.81	-101.167	1018.89	732.663	70.6482	972.956	647.621	319.381	690.754	717.611	337.841	740.932	438.905	255.091	753.601	447.052	275.34	756.433	353.804	241.927	736.375	267.165	-206.4	662.255	702.277	-169.746	735.805	431.522	-88.8791	756.881	442.461	-102.449	764.783	343.848	-66.5171	734.398	257.634
159	1.58	67.3278	1199.47	607.981	136.589	1194.43	657.992	-7.0701	1180.51	646.242	202.717	1033.98	774.819	-101.156	1018.89	732.677	70.6726	972.968	647.624	319.399	690.763	717.618	337.856	740.947	438.904	255.101	753.615	447.053	275.349	756.428	353.828	241.937	736.374	267.183	-206.428	662.315	702.343	-169.741	735.838	431.505	-88.8669	756.91	442.436	-102.453	764.811	343.828	-66.5347	734.426	257.622
160	1.59	67.3943	1199.37	608.034	136.684	1194.36	658.005	-7.02452	1180.49	646.18	202.763	1033.96	774.833	-101.098	1018.85	732.695	70.7332	972.925	647.672	319.439	690.726	717.596	337.912	740.904	438.925	255.142	753.595	447.071	275.392	756.403	353.856	241.999	736.326	267.208	-206.436	662.338	702.384	-169.727	735.83	431.497	-88.8286	756.904	442.43	-102.403	764.798	343.854	-66.477	734.373	257.65
161	1.6	67.4647	1199.26	608.135	136.765	1194.28	658.036	-6.99499	1180.45	646.145	202.804	1033.92	774.86	-101.045	1018.78	732.699	70.7907	972.819	647.802	319.455	690.693	717.607	337.997	740.813	439.023	255.158	753.565	447.094	275.427	756.362	353.89	242.065	736.243	267.245	-206.478	662.385	702.481	-169.712	735.814	431.517	-88.8085	756.869	442.467	-102.371	764.755	343.864	-66.4062	734.29	257.738
162	1.61	67.5098	1199.18	608.179	136.795	1194.21	658.048	-6.98309	1180.4	646.132	202.808	1033.88	774.848	-101.01	1018.72	732.707	70.8191	972.695	647.929	319.442	690.644	717.605	338.035	740.733	439.094	255.157	753.548	447.09	275.43	756.329	353.878	242.093	736.182	267.315	-206.482	662.368	702.447	-169.719	735.815	431.506	-88.805	756.843	442.496	-102.369	764.715	343.84	-66.376	734.221	257.829
163	1.62	67.5293	1199.17	608.124	136.814	1194.18	658.037	-6.99351	1180.4	646.149	202.809	1033.85	774.826	-100.991	1018.72	732.714	70.8307	972.634	647.989	319.42	690.609	717.592	338.041	740.696	439.123	255.132	753.532	447.076	275.42	756.311	353.864	242.091	736.157	267.352	-206.5	662.361	702.439	-169.747	735.82	431.497	-88.8045	756.825	442.506	-102.387	764.691	343.827	-66.3785	734.205	257.855
164	1.63	67.5221	1199.19	608.12	136.832	1194.18	658.031	-6.98404	1180.41	646.171	202.792	1033.86	774.827	-100.997	1018.74	732.683	70.8212	972.639	648.011	319.407	690.593	717.568	338.021	740.712	439.12	255.122	753.527	447.078	275.406	756.318	353.87	242.074	736.163	267.348	-206.505	662.33	702.398	-169.758	735.825	431.506	-88.8324	756.816	442.545	-102.406	764.687	343.842	-66.375	734.213	257.858
165	1.64	67.5276	1199.22	608.094	136.833	1194.23	657.967	-6.9676	1180.45	646.118	202.783	1033.87	774.772	-101.025	1018.77	732.659	70.782	972.679	647.866	319.379	690.605	717.556	337.98	740.761	439.025	255.136	753.52	447.102	275.384	756.343	353.835	242.044	736.206	267.261	-206.533	662.339	702.39	-169.757	735.812	431.487	-88.8551	756.83	442.513	-102.43	764.702	343.842	-66.3952	734.238	257.808
166	1.65	67.5378	1199.32	607.99	136.838	1194.31	657.919	-6.93922	1180.5	646.065	202.769	1033.88	774.737	-101.064	1018.82	732.606	70.7612	972.772	647.667	319.353	690.622	717.558	337.923	740.817	438.925	255.152	753.529	447.101	275.372	756.38	353.808	242.012	736.272	267.172	-206.569	662.362	702.415	-169.748	735.786	431.465	-88.8481	756.826	442.453	-102.44	764.724	343.807	-66.4205	734.288	257.728
167	1.66	67.5448	1199.44	607.941	136.83	1194.38	657.913	-6.92049	1180.57	646.098	202.758	1033.9	774.702	-101.092	1018.87	732.569	70.7348	972.843	647.548	319.34	690.635	717.573	337.891	740.863	438.904	255.138	753.548	447.085	275.359	756.41	353.802	241.968	736.333	267.146	-206.598	662.398	702.48	-169.757	735.771	431.452	-88.8472	756.842	442.46	-102.447	764.766	343.812	-66.4503	734.347	257.671
168	1.67	67.5169	1199.58	607.931	136.822	1194.46	657.938	-6.92905	1180.64	646.141	202.741	1033.92	774.669	-101.097	1018.9	732.538	70.6926	972.882	647.468	319.353	690.642	717.59	337.871	740.903	438.907	255.098	753.563	447.081	275.348	756.432	353.811	241.936	736.361	267.159	-206.6	662.454	702.555	-169.773	735.792	431.508	-88.8835	756.879	442.489	-102.457	764.788	343.836	-66.4907	734.404	257.645
169	1.68	67.5332	1199.71	607.973	136.86	1194.54	657.999	-6.92112	1180.73	646.134	202.763	1033.94	774.638	-101.076	1018.93	732.492	70.6964	972.897	647.452	319.381	690.653	717.609	337.882	740.915	438.919	255.103	753.582	447.082	275.358	756.445	353.837	241.953	736.352	267.189	-206.568	662.476	702.551	-169.763	735.827	431.536	-88.8841	756.898	442.48	-102.462	764.816	343.844	-66.4909	734.432	257.645
170	1.69	67.6161	1199.79	608.035	136.942	1194.61	658.065	-6.86738	1180.8	646.083	202.817	1033.96	774.59	-101.025	1018.91	732.43	70.7642	972.843	647.529	319.387	690.66	717.621	337.924	740.883	438.939	255.128	753.595	447.068	275.389	756.438	353.838	242.021	736.32	267.209	-206.58	662.512	702.569	-169.736	735.851	431.491	-88.8435	756.912	442.425	-102.41	764.798	343.813	-66.4443	734.382	257.674
171	1.7	67.7075	1199.84	608.192	136.994	1194.64	658.109	-6.82267	1180.85	646.054	202.856	1033.94	774.527	-100.971	1018.88	732.39	70.8263	972.754	647.585	319.399	690.645	717.634	337.99	740.814	438.988	255.158	753.586	447.065	275.405	756.413	353.821	242.072	736.271	267.225	-206.567	662.469	702.468	-169.718	735.836	431.44	-88.7983	756.909	442.38	-102.36	764.761	343.773	-66.3862	734.321	257.708
172	1.71	67.737	1199.89	608.386	137.013	1194.69	658.208	-6.80512	1180.89	646.076	202.881	1033.91	774.475	-100.938	1018.83	732.382	70.8558	972.694	647.629	319.427	690.623	717.629	338.038	740.745	439.028	255.165	753.57	447.068	275.408	756.377	353.826	242.08	736.224	267.254	-206.57	662.456	702.473	-169.715	735.818	431.452	-88.787	756.879	442.419	-102.335	764.718	343.797	-66.3572	734.269	257.751
173	1.72	67.7179	1199.99	608.49	137.004	1194.76	658.261	-6.81939	1180.94	646.107	202.881	1033.89	774.461	-100.928	1018.79	732.372	70.867	972.663	647.632	319.439	690.592	717.587	338.039	740.714	439.058	255.14	753.547	447.071	275.397	756.35	353.814	242.069	736.2	267.283	-206.589	662.446	702.496	-169.733	735.806	431.476	-88.8129	756.836	442.464	-102.351	764.691	343.829	-66.3699	734.237	257.763
174	1.73	67.6943	1200.12	608.571	136.963	1194.84	658.286	-6.84686	1180.98	646.144	202.857	1033.89	774.43	-100.955	1018.8	732.354	70.8123	972.683	647.614	319.428	690.582	717.558	338.007	740.727	439.034	255.119	753.531	447.083	275.373	756.342	353.793	242.034	736.193	267.282	-206.56	662.377	702.354	-169.767	735.793	431.489	-88.8614	756.818	442.472	-102.395	764.688	343.83	-66.3915	734.236	257.758
175	1.74	67.6592	1200.26	608.559	136.932	1194.92	658.31	-6.862	1181.03	646.215	202.84	1033.91	774.399	-100.992	1018.82	732.32	70.7812	972.748	647.662	319.431	690.597	717.549	337.961	740.765	438.999	255.114	753.524	447.103	275.358	756.36	353.799	242	736.215	267.234	-206.534	662.347	702.257	-169.775	735.775	431.467	-88.8869	756.828	442.489	-102.426	764.707	343.811	-66.4146	734.247	257.769
176	1.75	67.6573	1200.4	608.511	136.923	1194.98	658.307	-6.84932	1181.08	646.253	202.841	1033.93	774.388	-100.996	1018.85	732.312	70.7847	972.828	647.576	319.437	690.612	717.537	337.943	740.804	438.945	255.139	753.522	447.099	275.371	756.383	353.801	241.99	736.268	267.162	-206.546	662.367	702.264	-169.764	735.758	431.463	-88.879	756.836	442.486	-102.434	764.73	343.828	-66.422	734.264	257.744
177	1.76	67.6549	1200.53	608.392	136.919	1195.03	658.301	-6.83469	1181.13	646.244	202.851	1033.95	774.369	-100.988	1018.87	732.299	70.7881	972.918	647.4	319.448	690.605	717.539	337.932	740.833	438.912	255.171	753.542	447.07	275.392	756.393	353.82	241.996	736.311	267.147	-206.599	662.431	702.403	-169.741	735.764	431.456	-88.859	756.857	442.439	-102.412	764.753	343.813	-66.4205	734.314	257.691
178	1.77	67.6213	1200.65	608.358	136.915	1195.09	658.361	-6.83768	1181.17	646.276	202.854	1033.96	774.39	-100.992	1018.9	732.297	70.7752	972.981	647.358	319.458	690.582	717.538	337.928	740.846	438.914	255.186	753.558	447.076	275.39	756.4	353.844	241.992	736.313	267.186	-206.644	662.489	702.523	-169.736	735.787	431.477	-88.8496	756.876	442.415	-102.423	764.772	343.824	-66.4249	734.327	257.691
179	1.78	67.5789	1200.73	608.414	136.909	1195.11	658.416	-6.8537	1181.21	646.351	202.862	1033.95	774.425	-100.989	1018.9	732.326	70.7866	973.01	647.426	319.483	690.566	717.532	337.948	740.839	438.96	255.172	753.575	447.097	275.396	756.391	353.887	241.997	736.299	267.222	-206.65	662.53	702.558	-169.741	735.82	431.489	-88.8559	756.9	442.44	-102.406	764.783	343.837	-66.4334	734.346	257.679
180	1.79	67.5765	1200.73	608.5	136.915	1195.11	658.436	-6.85945	1181.23	646.384	202.892	1033.95	774.454	-100.969	1018.89	732.324	70.7807	973.023	647.403	319.519	690.566	717.545	337.977	740.815	438.997	255.165	753.579	447.074	275.41	756.387	353.887	242.026	736.279	267.261	-206.635	662.561	702.576	-169.729	735.842	431.454	-88.8398	756.916	442.41	-102.397	764.797	343.795	-66.4295	734.346	257.676
181	1.8	67.5908	1200.66	608.594	136.924	1195.1	658.44	-6.86767	1181.22	646.389	202.917	1033.94	774.451	-100.935	1018.85	732.335	70.7949	972.97	647.478	319.533	690.575	717.539	338.004	740.784	438.982	255.172	753.549	447.056	275.418	756.372	353.868	242.043	736.254	267.272	-206.62	662.544	702.552	-169.729	735.826	431.434	-88.8259	756.892	442.396	-102.388	764.774	343.799	-66.418	734.309	257.671
182	1.81	67.5976	1200.55	608.847	136.927	1195.08	658.497	-6.89342	1181.18	646.45	202.912	1033.91	774.478	-100.912	1018.8	732.38	70.8236	972.888	647.637	319.521	690.564	717.527	338.02	740.732	439.01	255.179	753.52	447.073	275.418	756.345	353.866	242.052	736.206	267.295	-206.609	662.508	702.563	-169.746	735.802	431.451	-88.8414	756.85	442.448	-102.391	764.729	343.812	-66.3977	734.242	257.743
183	1.82	67.5882	1200.48	609.015	136.906	1195.06	658.53	-6.92287	1181.16	646.552	202.901	1033.87	774.518	-100.913	1018.76	732.416	70.8402	972.824	647.769	319.495	690.55	717.531	338.019	740.705	439.054	255.163	753.507	447.107	275.406	756.332	353.842	242.054	736.191	267.304	-206.542	662.416	702.425	-169.755	735.77	431.483	-88.8442	756.821	442.501	-102.417	764.694	343.854	-66.382	734.209	257.776
184	1.83	67.5668	1200.48	608.999	136.858	1195.07	658.526	-6.94584	1181.15	646.61	202.868	1033.86	774.557	-100.938	1018.76	732.472	70.8317	972.841	647.783	319.468	690.549	717.535	337.987	740.725	439.04	255.142	753.514	447.125	275.386	756.34	353.831	242.03	736.214	267.28	-206.503	662.357	702.367	-169.762	735.761	431.518	-88.858	756.809	442.513	-102.429	764.687	343.873	-66.3963	734.217	257.778
185	1.84	67.5183	1200.5	608.993	136.823	1195.08	658.52	-6.9607	1181.15	646.646	202.849	1033.87	774.608	-100.968	1018.78	732.489	70.8201	972.889	647.836	319.445	690.56	717.539	337.952	740.775	439.018	255.127	753.523	447.136	275.369	756.363	353.827	241.994	736.245	267.229	-206.448	662.305	702.297	-169.762	735.767	431.54	-88.8702	756.806	442.525	-102.437	764.693	343.895	-66.4086	734.263	257.778
186	1.85	67.4958	1200.55	608.897	136.809	1195.11	658.496	-6.95399	1181.16	646.664	202.844	1033.9	774.626	-100.984	1018.82	732.495	70.8075	972.949	647.814	319.416	690.604	717.586	337.921	740.815	438.972	255.124	753.552	447.111	275.368	756.403	353.822	241.974	736.288	267.199	-206.417	662.303	702.303	-169.746	735.782	431.544	-88.8652	756.824	442.499	-102.433	764.722	343.883	-66.43	734.311	257.754
187	1.86	67.5022	1200.56	608.798	136.812	1195.1	658.496	-6.92894	1181.16	646.625	202.866	1033.91	774.63	-100.969	1018.87	732.522	70.8053	973.025	647.659	319.395	690.629	717.601	337.906	740.854	438.917	255.132	753.584	447.073	275.366	756.435	353.803	241.974	736.332	267.147	-206.392	662.318	702.297	-169.71	735.799	431.515	-88.8366	756.845	442.444	-102.394	764.763	343.812	-66.4309	734.349	257.712
188	1.87	67.5065	1200.53	608.799	136.833	1195.09	658.499	-6.92114	1181.15	646.61	202.879	1033.91	774.658	-100.958	1018.88	732.53	70.8063	973.045	647.621	319.408	690.632	717.609	337.911	740.872	438.895	255.138	753.59	447.052	275.371	756.437	353.792	241.99	736.349	267.116	-206.408	662.33	702.305	-169.699	735.813	431.467	-88.8112	756.873	442.418	-102.374	764.766	343.791	-66.4211	734.367	257.672
189	1.88	67.5184	1200.51	608.813	136.841	1195.07	658.542	-6.93925	1181.14	646.668	202.889	1033.91	774.722	-100.956	1018.87	732.56	70.7989	973.057	647.7	319.417	690.603	717.61	337.931	740.862	438.926	255.131	753.594	447.048	275.377	756.43	353.831	241.994	736.325	267.167	-206.444	662.394	702.452	-169.705	735.824	431.484	-88.8104	756.881	442.43	-102.384	764.776	343.794	-66.4172	734.371	257.653
190	1.89	67.5009	1200.49	608.818	136.841	1195.03	658.582	-6.94734	1181.12	646.666	202.886	1033.89	774.774	-100.95	1018.86	732.599	70.7648	973.049	647.764	319.414	690.569	717.599	337.936	740.848	438.951	255.111	753.584	447.057	275.382	756.41	353.874	241.998	736.293	267.223	-206.485	662.449	702.542	-169.718	735.83	431.508	-88.8239	756.888	442.437	-102.398	764.776	343.813	-66.434	734.354	257.681
191	1.9	67.5267	1200.41	608.898	136.864	1194.98	658.609	-6.94948	1181.1	646.643	202.886	1033.86	774.761	-100.941	1018.83	732.608	70.7733	973	647.904	319.418	690.557	717.586	337.957	740.822	438.991	255.113	753.549	447.08	275.399	756.383	353.897	242.023	736.255	267.251	-206.493	662.449	702.521	-169.723	735.821	431.516	-88.8181	756.883	442.433	-102.412	764.755	343.847	-66.4305	734.319	257.715
192	1.91	67.5525	1200.34	608.952	136.885	1194.95	658.613	-6.9554	1181.08	646.664	202.885	1033.84	774.77	-100.932	1018.81	732.629	70.7798	972.956	647.964	319.418	690.531	717.566	337.978	740.782	439.018	255.134	753.516	447.096	275.411	756.359	353.886	242.041	736.23	267.237	-206.474	662.426	702.455	-169.737	735.795	431.518	-88.8305	756.851	442.446	-102.395	764.727	343.847	-66.409	734.28	257.76
193	1.92	67.5798	1200.3	609.013	136.89	1194.92	658.627	-6.93152	1181.07	646.654	202.885	1033.82	774.804	-100.922	1018.8	732.666	70.7976	972.948	647.963	319.413	690.524	717.577	337.986	740.759	439.025	255.144	753.502	447.096	275.418	756.345	353.871	242.036	736.217	267.234	-206.487	662.417	702.468	-169.75	735.78	431.528	-88.8393	756.814	442.507	-102.398	764.706	343.862	-66.3744	734.25	257.809
194	1.93	67.5984	1200.28	609.03	136.88	1194.91	658.635	-6.91205	1181.07	646.642	202.869	1033.82	774.817	-100.927	1018.81	732.681	70.8114	972.952	647.958	319.393	690.53	717.622	337.972	740.78	439.043	255.151	753.513	447.119	275.405	756.356	353.861	242.03	736.23	267.23	-206.484	662.365	702.41	-169.758	735.777	431.555	-88.8385	756.809	442.556	-102.408	764.71	343.857	-66.3706	734.24	257.82
195	1.94	67.6096	1200.31	608.93	136.878	1194.93	658.619	-6.91071	1181.08	646.654	202.851	1033.83	774.813	-100.957	1018.84	732.646	70.8167	972.989	647.886	319.366	690.528	717.608	337.936	740.81	439.019	255.155	753.542	447.114	275.383	756.381	353.857	242.022	736.267	267.214	-206.484	662.303	702.342	-169.752	735.781	431.552	-88.8334	756.827	442.517	-102.408	764.715	343.823	-66.3719	734.274	257.797
196	1.95	67.6138	1200.36	608.843	136.882	1194.95	658.598	-6.89876	1181.09	646.629	202.837	1033.85	774.783	-100.98	1018.86	732.62	70.809	973.035	647.816	319.348	690.527	717.584	337.908	740.836	438.978	255.157	753.555	447.099	275.371	756.393	353.839	242.001	736.304	267.197	-206.516	662.337	702.363	-169.729	735.784	431.499	-88.8356	756.848	442.475	-102.409	764.73	343.826	-66.3678	734.307	257.787
197	1.96	67.5927	1200.4	608.766	136.89	1194.96	658.589	-6.87462	1181.11	646.59	202.847	1033.87	774.768	-100.978	1018.88	732.604	70.781	973.081	647.753	319.373	690.547	717.572	337.902	740.85	438.959	255.161	753.56	447.092	275.371	756.4	353.825	242.001	736.313	267.182	-206.539	662.42	702.43	-169.719	735.798	431.493	-88.8307	756.858	442.479	-102.407	764.749	343.828	-66.3821	734.339	257.728
198	1.97	67.581	1200.39	608.728	136.889	1194.96	658.546	-6.86812	1181.1	646.575	202.86	1033.87	774.739	-100.969	1018.88	732.571	70.7736	973.047	647.769	319.411	690.558	717.585	337.912	740.847	438.942	255.164	753.548	447.099	275.379	756.401	353.823	242.003	736.306	267.174	-206.579	662.495	702.499	-169.711	735.809	431.479	-88.8295	756.861	442.469	-102.402	764.755	343.823	-66.3878	734.334	257.7
199	1.98	67.5706	1200.35	608.777	136.878	1194.94	658.517	-6.87789	1181.09	646.563	202.862	1033.84	774.691	-100.966	1018.85	732.54	70.7668	972.995	647.788	319.418	690.534	717.567	337.921	740.825	438.954	255.139	753.522	447.105	275.389	756.383	353.843	242.01	736.278	267.178	-206.562	662.457	702.406	-169.724	735.798	431.471	-88.8321	756.848	442.451	-102.402	764.736	343.847	-66.3903	734.298	257.722
200	1.99	67.5534	1200.33	608.865	136.888	1194.93	658.534	-6.90877	1181.09	646.586	202.857	1033.83	774.704	-100.955	1018.83	732.543	70.7398	972.984	647.822	319.413	690.515	717.571	337.943	740.775	439.032	255.099	753.517	447.109	275.39	756.358	353.882	242.021	736.242	267.243	-206.586	662.458	702.422	-169.757	735.806	431.497	-88.8634	756.856	442.486	-102.418	764.723	343.866	-66.4143	734.273	257.743
201	2	67.5529	1200.32	608.927	136.897	1194.91	658.562	-6.91927	1181.09	646.603	202.871	1033.83	774.71	-100.94	1018.82	732.553	70.7488	972.924	647.876	319.424	690.51	717.617	337.968	740.749	439.082	255.068	753.521	447.104	275.389	756.335	353.91	242.038	736.205	267.308	-206.605	662.495	702.519	-169.763	735.807	431.513	-88.8667	756.859	442.517	-102.425	764.732	343.864	-66.4227	734.288	257.776
202	2.01	67.5724	1200.3	608.908	136.906	1194.9	658.542	-6.9018	1181.08	646.537	202.889	1033.84	774.677	-100.927	1018.83	732.521	70.7647	972.898	647.802	319.429	690.503	717.615	337.969	740.753	439.063	255.08	753.53	447.087	275.391	756.342	353.876	242.05	736.211	267.307	-206.594	662.492	702.494	-169.748	735.797	431.494	-88.8561	756.857	442.495	-102.411	764.728	343.856	-66.397	734.286	257.78
203	2.02	67.5913	1200.32	608.81	136.918	1194.93	658.468	-6.8889	1181.07	646.465	202.879	1033.86	774.594	-100.934	1018.86	732.47	70.7682	972.926	647.7	319.402	690.514	717.575	337.95	740.786	439.001	255.11	753.54	447.1	275.396	756.375	353.853	242.043	736.249	267.238	-206.583	662.448	702.365	-169.743	735.804	431.449	-88.8454	756.862	442.47	-102.402	764.734	343.809	-66.394	734.303	257.74
204	2.03	67.5753	1200.34	608.659	136.891	1194.95	658.371	-6.88982	1181.07	646.431	202.863	1033.86	774.536	-100.957	1018.89	732.449	70.7799	972.98	647.583	319.385	690.525	717.554	337.927	740.83	438.963	255.13	753.553	447.105	275.388	756.41	353.833	242.019	736.299	267.166	-206.605	662.436	702.349	-169.74	735.806	431.463	-88.8398	756.861	442.435	-102.409	764.748	343.778	-66.3933	734.326	257.731
205	2.04	67.5508	1200.35	608.506	136.862	1194.97	658.288	-6.89434	1181.05	646.364	202.85	1033.86	774.513	-100.987	1018.89	732.411	70.7734	972.994	647.531	319.373	690.527	717.572	337.9	740.857	438.91	255.135	753.563	447.076	275.369	756.422	353.801	241.986	736.332	267.128	-206.644	662.452	702.449	-169.744	735.797	431.496	-88.8404	756.854	442.433	-102.412	764.728	343.824	-66.3932	734.336	257.714
206	2.05	67.5034	1200.35	608.386	136.836	1194.95	658.269	-6.90799	1181.03	646.345	202.845	1033.86	774.491	-101.005	1018.9	732.395	70.7538	972.978	647.495	319.363	690.514	717.572	337.883	740.866	438.908	255.127	753.549	447.073	275.357	756.42	353.785	241.967	736.33	267.133	-206.626	662.421	702.428	-169.753	735.801	431.509	-88.8573	756.857	442.459	-102.428	764.723	343.851	-66.4006	734.341	257.701
207	2.06	67.4665	1200.33	608.332	136.834	1194.93	658.238	-6.93591	1181.02	646.33	202.833	1033.86	774.487	-101.003	1018.88	732.388	70.7391	972.952	647.504	319.374	690.506	717.555	337.892	740.847	438.944	255.123	753.543	447.097	275.362	756.411	353.822	241.968	736.307	267.178	-206.604	662.421	702.393	-169.765	735.801	431.508	-88.8585	756.857	442.463	-102.425	764.732	343.894	-66.4102	734.326	257.704
208	2.07	67.4645	1200.28	608.259	136.853	1194.89	658.192	-6.93936	1181	646.261	202.862	1033.87	774.483	-100.986	1018.87	732.373	70.7543	972.906	647.495	319.419	690.505	717.561	337.927	740.807	438.981	255.13	753.544	447.082	275.379	756.397	353.85	241.998	736.271	267.201	-206.597	662.483	702.461	-169.752	735.806	431.501	-88.8456	756.859	442.472	-102.404	764.751	343.865	-66.3963	734.304	257.713
209	2.08	67.494	1200.21	608.229	136.88	1194.85	658.153	-6.91842	1180.97	646.179	202.895	1033.86	774.455	-100.944	1018.86	732.36	70.7777	972.836	647.515	319.464	690.499	717.593	337.971	740.777	438.98	255.152	753.53	447.081	275.413	756.371	353.86	242.046	736.226	267.202	-206.598	662.513	702.528	-169.724	735.806	431.484	-88.8154	756.858	442.42	-102.37	764.741	343.826	-66.37	734.275	257.735
210	2.09	67.5002	1200.16	608.218	136.895	1194.83	658.136	-6.9136	1180.95	646.133	202.913	1033.87	774.448	-100.925	1018.83	732.36	70.7965	972.787	647.556	319.478	690.49	717.609	338.013	740.756	439.033	255.156	753.512	447.098	275.435	756.359	353.88	242.074	736.205	267.255	-206.6	662.496	702.541	-169.72	735.804	431.464	-88.8157	756.852	442.411	-102.371	764.731	343.809	-66.3635	734.259	257.756
211	2.1	67.4629	1200.12	608.17	136.878	1194.8	658.108	-6.93593	1180.93	646.134	202.904	1033.87	774.455	-100.938	1018.8	732.366	70.7916	972.759	647.544	319.469	690.474	717.585	338.001	740.747	439.068	255.147	753.506	447.114	275.428	756.353	353.883	242.061	736.198	267.299	-206.629	662.479	702.572	-169.741	735.805	431.492	-88.8322	756.86	442.473	-102.398	764.726	343.832	-66.3613	734.245	257.81
212	2.11	67.4326	1200.12	608.071	136.842	1194.81	658.013	-6.95937	1180.91	646.105	202.877	1033.86	774.44	-100.959	1018.8	732.353	70.772	972.793	647.465	319.467	690.472	717.559	337.97	740.753	439.044	255.142	753.528	447.086	275.402	756.353	353.86	242.026	736.209	267.273	-206.636	662.439	702.538	-169.758	735.795	431.52	-88.8476	756.856	442.49	-102.417	764.722	343.86	-66.3762	734.249	257.792
213	2.12	67.4013	1200.11	608.004	136.798	1194.82	657.94	-6.97676	1180.91	646.063	202.848	1033.87	774.409	-100.991	1018.82	732.341	70.7651	972.813	647.445	319.461	690.494	717.529	337.941	740.778	439.008	255.124	753.538	447.072	275.387	756.36	353.848	241.993	736.222	267.215	-206.572	662.38	702.443	-169.756	735.785	431.511	-88.86	756.835	442.463	-102.424	764.717	343.841	-66.3972	734.275	257.76
214	2.13	67.3636	1200.12	607.98	136.764	1194.85	657.888	-6.9889	1180.89	646.031	202.826	1033.9	774.425	-101.019	1018.85	732.345	70.7615	972.799	647.467	319.463	690.536	717.514	337.905	740.818	438.953	255.115	753.535	447.094	275.37	756.384	353.84	241.973	736.266	267.188	-206.56	662.385	702.433	-169.752	735.774	431.495	-88.8772	756.817	442.487	-102.436	764.707	343.853	-66.4121	734.281	257.751
215	2.14	67.3401	1200.16	607.89	136.736	1194.88	657.817	-7.00368	1180.89	646.022	202.795	1033.93	774.404	-101.037	1018.89	732.34	70.7629	972.806	647.395	319.477	690.584	717.539	337.889	740.84	438.902	255.116	753.543	447.099	275.353	756.401	353.796	241.967	736.312	267.171	-206.546	662.387	702.365	-169.752	735.77	431.521	-88.8826	756.812	442.478	-102.435	764.729	343.837	-66.4245	734.288	257.729
216	2.15	67.3162	1200.17	607.837	136.71	1194.88	657.782	-7.00785	1180.89	645.979	202.784	1033.94	774.417	-101.049	1018.91	732.322	70.7811	972.803	647.386	319.483	690.628	717.547	337.89	740.86	438.889	255.124	753.545	447.116	275.356	756.402	353.798	241.957	736.313	267.163	-206.583	662.435	702.432	-169.757	735.764	431.53	-88.8788	756.822	442.454	-102.413	764.733	343.855	-66.4375	734.309	257.716
217	2.16	67.3042	1200.15	607.896	136.699	1194.88	657.824	-7.01728	1180.89	645.996	202.781	1033.94	774.481	-101.042	1018.91	732.324	70.8061	972.794	647.386	319.492	690.649	717.547	337.897	740.862	438.913	255.124	753.547	447.113	275.373	756.401	353.832	241.961	736.294	267.199	-206.627	662.48	702.488	-169.762	735.77	431.527	-88.8782	756.844	442.464	-102.42	764.731	343.875	-66.426	734.319	257.734
218	2.17	67.3101	1200.12	607.972	136.711	1194.9	657.899	-7.0381	1180.9	646.009	202.786	1033.96	774.541	-101.029	1018.92	732.337	70.8419	972.765	647.456	319.509	690.679	717.568	337.924	740.847	438.972	255.118	753.554	447.131	275.379	756.397	353.852	241.989	736.265	267.243	-206.667	662.512	702.485	-169.76	735.792	431.514	-88.8772	756.857	442.49	-102.418	764.725	343.874	-66.4016	734.286	257.772
219	2.18	67.3335	1200.15	607.969	136.725	1194.91	657.913	-7.04077	1180.92	645.978	202.804	1033.98	774.577	-101.002	1018.93	732.304	70.8871	972.739	647.474	319.531	690.715	717.578	337.975	740.821	438.991	255.14	753.575	447.113	275.402	756.381	353.87	242.023	736.245	267.254	-206.763	662.629	702.587	-169.737	735.816	431.479	-88.8421	756.864	442.453	-102.405	764.72	343.853	-66.3861	734.276	257.757
220	2.19	67.3419	1200.18	607.961	136.737	1194.93	657.927	-7.02504	1180.94	645.973	202.823	1033.99	774.611	-100.969	1018.93	732.268	70.9537	972.718	647.508	319.562	690.737	717.568	338.027	740.816	439.001	255.159	753.586	447.104	275.415	756.374	353.847	242.062	736.239	267.251	-206.848	662.715	702.645	-169.728	735.834	431.461	-88.804	756.863	442.41	-102.371	764.725	343.82	-66.365	734.288	257.734
221	2.2	67.3249	1200.23	608.023	136.734	1194.97	657.948	-7.02783	1180.93	646.014	202.819	1034.01	774.654	-100.963	1018.94	732.25	70.975	972.709	647.503	319.577	690.74	717.535	338.039	740.836	439.024	255.168	753.593	447.105	275.428	756.377	353.873	242.071	736.248	267.247	-206.935	662.764	702.677	-169.724	735.841	431.459	-88.8035	756.868	442.442	-102.346	764.716	343.815	-66.3518	734.296	257.763
222	2.21	67.2906	1200.3	608.019	136.698	1195.01	657.971	-7.04915	1180.93	646.068	202.792	1034.01	774.731	-100.98	1018.94	732.219	71.0061	972.715	647.525	319.57	690.747	717.535	337.999	740.854	439.001	255.157	753.61	447.092	275.412	756.388	353.863	242.049	736.259	267.241	-207.037	662.788	702.727	-169.731	735.833	431.483	-88.8263	756.865	442.458	-102.374	764.716	343.793	-66.3761	734.304	257.724
223	2.22	67.2556	1200.37	607.996	136.642	1195.04	657.969	-7.0739	1180.94	646.097	202.759	1034.02	774.803	-100.988	1018.97	732.202	71.045	972.711	647.537	319.557	690.769	717.554	337.955	740.879	438.959	255.142	753.605	447.079	275.377	756.382	353.811	242.011	736.259	267.239	-207.096	662.771	702.679	-169.748	735.805	431.482	-88.8718	756.855	442.455	-102.383	764.719	343.763	-66.3764	734.304	257.727
224	2.23	67.2343	1200.39	608.024	136.618	1195.08	657.997	-7.08081	1180.94	646.115	202.733	1034.02	774.865	-100.998	1018.99	732.175	71.096	972.667	647.533	319.559	690.819	717.576	337.929	740.901	438.925	255.136	753.588	447.091	275.369	756.386	353.824	241.982	736.279	267.235	-207.09	662.678	702.374	-169.769	735.785	431.478	-88.8913	756.845	442.481	-102.396	764.719	343.799	-66.3774	734.28	257.745
225	2.24	67.2294	1200.4	608.089	136.596	1195.1	657.995	-7.08567	1180.93	646.145	202.724	1034.03	774.904	-100.998	1019.01	732.139	71.1339	972.614	647.525	319.573	690.86	717.552	337.931	740.914	438.942	255.127	753.588	447.119	275.365	756.398	353.842	241.965	736.3	267.221	-207.164	662.704	702.241	-169.774	735.795	431.467	-88.8863	756.835	442.47	-102.411	764.718	343.831	-66.3693	734.275	257.745
226	2.25	67.2622	1200.42	608.16	136.611	1195.11	658.043	-7.07052	1180.94	646.155	202.725	1034.03	774.959	-100.99	1019.04	732.097	71.193	972.577	647.565	319.588	690.89	717.563	337.933	740.92	438.938	255.134	753.591	447.142	275.362	756.397	353.843	241.968	736.298	267.208	-207.287	662.789	702.271	-169.769	735.814	431.426	-88.8907	756.842	442.447	-102.396	764.732	343.81	-66.3427	734.279	257.738
227	2.26	67.295	1200.43	608.187	136.671	1195.1	658.138	-7.03861	1180.94	646.149	202.728	1034.02	775.036	-100.962	1019.06	732.066	71.2745	972.524	647.618	319.627	690.931	717.616	337.939	740.922	438.942	255.147	753.599	447.137	275.377	756.388	353.855	241.983	736.287	267.227	-207.379	662.854	702.259	-169.752	735.819	431.404	-88.8851	756.849	442.453	-102.371	764.738	343.793	-66.3148	734.264	257.768
228	2.27	67.3315	1200.42	608.221	136.722	1195.08	658.214	-7.01315	1180.92	646.14	202.716	1034.01	775.123	-100.927	1019.05	732.055	71.3389	972.449	647.734	319.672	690.943	717.623	337.966	740.912	438.987	255.156	753.615	447.134	275.393	756.37	353.879	242.015	736.255	267.28	-207.474	662.927	702.26	-169.755	735.839	431.411	-88.8769	756.862	442.476	-102.344	764.744	343.783	-66.2918	734.257	257.789
229	2.28	67.364	1200.4	608.26	136.754	1195.05	658.24	-6.98819	1180.91	646.117	202.714	1034	775.193	-100.905	1019.06	731.997	71.3931	972.38	647.786	319.717	690.967	717.625	337.99	740.894	439.008	255.161	753.614	447.121	275.402	756.355	353.899	242.02	736.222	267.313	-207.596	663.005	702.281	-169.767	735.864	431.396	-88.8832	756.871	442.449	-102.326	764.743	343.757	-66.2835	734.253	257.787
230	2.29	67.4106	1200.36	608.254	136.781	1195.02	658.233	-6.95979	1180.9	646.096	202.709	1033.99	775.221	-100.888	1019.06	731.938	71.4524	972.267	647.885	319.75	690.998	717.615	337.99	740.897	438.961	255.176	753.608	447.115	275.394	756.349	353.871	242.008	736.226	267.319	-207.735	663.079	702.277	-169.768	735.855	431.339	-88.9034	756.876	442.436	-102.339	764.74	343.727	-66.3103	734.256	257.75
231	2.3	67.4508	1200.32	608.274	136.794	1194.99	658.224	-6.9379	1180.88	646.102	202.683	1033.97	775.278	-100.895	1019.07	731.916	71.4911	972.149	648.051	319.777	691.017	717.593	337.98	740.904	438.95	255.15	753.606	447.125	275.378	756.348	353.866	242.004	736.238	267.316	-207.817	663.101	702.214	-169.791	735.847	431.338	-88.9243	756.852	442.497	-102.371	764.73	343.775	-66.3142	734.252	257.749
232	2.31	67.5085	1200.26	608.378	136.814	1194.98	658.217	-6.92642	1180.85	646.102	202.643	1033.96	775.341	-100.9	1019.08	731.902	71.5265	972.066	648.168	319.789	691.018	717.553	337.962	740.921	438.959	255.12	753.601	447.143	275.367	756.353	353.884	241.981	736.24	267.303	-207.864	663.014	702.006	-169.553	735.58	431.866	-88.9518	756.835	442.553	-102.042	764.41	344.568	-65.9091	733.974	258.708
233	2.32	67.6056	1200.22	608.405	136.866	1194.96	658.215	-6.87756	1180.83	646.059	202.623	1033.93	775.372	-100.881	1019.08	731.857	71.5964	972.001	648.185	319.782	691.018	717.575	337.954	740.933	438.942	255.118	753.608	447.137	275.354	756.359	353.881	241.97	736.242	267.301	-207.959	662.981	701.934	-169.213	735.24	432.48	-88.9649	756.83	442.531	-101.586	764.003	345.501	-65.3902	733.65	259.897
234	2.33	67.7098	1200.24	608.314	136.935	1194.95	658.191	-6.78017	1180.82	645.973	202.64	1033.91	775.419	-100.84	1019.11	731.844	71.6961	971.94	648.157	319.77	691.046	717.614	337.97	740.956	438.934	255.142	753.624	447.124	275.365	756.367	353.89	241.989	736.273	267.286	-208.07	663.065	702.024	-169.65	735.688	431.635	-88.9308	756.824	442.509	-102.153	764.525	344.215	-66.0382	734.124	258.302
235	2.34	67.8147	1200.27	608.161	137.01	1194.95	658.175	-6.70065	1180.85	645.899	202.669	1033.92	775.427	-100.791	1019.17	731.818	71.7841	971.91	648.146	319.781	691.071	717.619	337.977	740.971	438.908	255.176	753.651	447.115	275.375	756.395	353.893	242.005	736.302	267.277	-208.139	663.19	702.082	-169.467	735.576	431.882	-88.8836	756.843	442.484	-101.885	764.384	344.631	-65.7794	734	258.821
236	2.35	67.9054	1200.31	608.094	137.081	1194.95	658.087	-6.62098	1180.87	645.816	202.696	1033.92	775.452	-100.754	1019.23	731.752	71.8551	971.865	648.133	319.803	691.108	717.64	337.97	740.987	438.867	255.182	753.658	447.105	275.363	756.423	353.838	242.004	736.326	267.249	-208.206	663.315	702.101	-168.873	735.042	432.902	-88.8652	756.87	442.453	-101.066	763.746	346.205	-64.9015	733.444	260.839
237	2.36	67.9653	1200.34	608.054	137.139	1194.94	658.011	-6.54526	1180.89	645.775	202.717	1033.91	775.487	-100.72	1019.28	731.667	71.909	971.82	648.079	319.817	691.103	717.633	337.97	741	438.873	255.186	753.65	447.092	275.366	756.427	353.823	241.997	736.33	267.239	-208.291	663.431	702.119	-168.728	734.914	433.174	-88.8594	756.872	442.431	-100.879	763.568	346.602	-64.6864	733.307	261.354
238	2.37	68.0193	1200.34	608.035	137.185	1194.92	657.958	-6.49669	1180.89	645.744	202.725	1033.88	775.51	-100.704	1019.32	731.577	71.931	971.729	648.065	319.813	691.064	717.628	337.969	740.981	438.932	255.147	753.635	447.095	275.384	756.406	353.877	241.985	736.31	267.257	-208.402	663.552	702.191	-168.707	734.872	433.265	-88.8769	756.861	442.436	-100.868	763.509	346.663	-64.6297	733.256	261.51
239	2.38	68.0642	1200.36	608.02	137.234	1194.9	657.921	-6.45768	1180.91	645.725	202.728	1033.84	775.543	-100.679	1019.37	731.484	71.9591	971.623	648.059	319.801	691.019	717.615	337.95	740.951	438.965	255.118	753.614	447.114	275.384	756.377	353.908	241.977	736.263	267.31	-208.483	663.627	702.209	-168.731	734.854	433.312	-88.9061	756.854	442.44	-100.889	763.471	346.739	-64.6261	733.225	261.541
240	2.39	68.143	1200.39	608.007	137.302	1194.9	657.874	-6.3827	1180.94	645.67	202.746	1033.8	775.548	-100.615	1019.43	731.354	72.0369	971.544	648.073	319.785	690.977	717.612	337.969	740.92	438.982	255.119	753.601	447.113	275.383	756.352	353.903	241.985	736.231	267.33	-208.561	663.688	702.188	-168.713	734.819	433.304	-88.9189	756.846	442.477	-100.882	763.469	346.73	-64.6059	733.193	261.547
241	2.4	68.2726	1200.42	608.001	137.392	1194.93	657.81	-6.27498	1180.98	645.594	202.801	1033.78	775.528	-100.529	1019.48	731.185	72.1675	971.462	648.008	319.784	690.944	717.594	338.009	740.891	438.998	255.147	753.601	447.102	275.395	756.349	353.898	242.01	736.22	267.333	-208.635	663.716	702.068	-168.677	734.795	433.28	-88.9207	756.825	442.494	-100.873	763.518	346.589	-64.5751	733.156	261.569
242	2.41	68.3889	1200.51	607.904	137.452	1194.97	657.73	-6.18204	1181.05	645.551	202.848	1033.78	775.527	-100.47	1019.56	731.002	72.2647	971.375	647.874	319.779	690.935	717.593	338.016	740.882	439.004	255.162	753.595	447.124	275.395	756.361	353.885	242.016	736.231	267.296	-208.693	663.743	701.938	-168.668	734.79	433.262	-88.928	756.817	442.526	-100.866	763.529	346.545	-64.5718	733.131	261.592
243	2.42	68.4954	1200.59	607.759	137.509	1195.04	657.623	-6.08199	1181.13	645.496	202.859	1033.77	775.484	-100.427	1019.67	730.844	72.3379	971.307	647.7	319.763	690.911	717.563	338.001	740.907	438.991	255.16	753.6	447.137	275.389	756.373	353.866	242.005	736.258	267.276	-208.798	663.823	701.94	-168.678	734.814	433.264	-88.9476	756.831	442.514	-100.844	763.521	346.57	-64.5808	733.144	261.578
244	2.43	68.6145	1200.63	607.686	137.576	1195.07	657.488	-5.9646	1181.19	645.4	202.884	1033.76	775.459	-100.377	1019.77	730.658	72.4288	971.242	647.522	319.758	690.889	717.56	337.988	740.924	438.965	255.178	753.612	447.126	275.379	756.384	353.851	241.989	736.288	267.259	-208.958	663.944	702.006	-168.695	734.85	433.275	-88.9419	756.837	442.495	-100.833	763.544	346.518	-64.5784	733.144	261.558
245	2.44	68.7083	1200.65	607.621	137.649	1195.08	657.399	-5.83464	1181.24	645.329	202.898	1033.74	775.456	-100.323	1019.85	730.477	72.526	971.155	647.394	319.766	690.87	717.561	337.965	740.938	438.932	255.189	753.618	447.108	275.374	756.391	353.864	241.979	736.286	267.262	-209.156	664.145	702.123	-168.719	734.873	433.247	-88.9335	756.832	442.469	-100.814	763.518	346.557	-64.5756	733.153	261.541
246	2.45	68.8	1200.66	607.56	137.73	1195.08	657.331	-5.7151	1181.3	645.285	202.923	1033.72	775.471	-100.268	1019.92	730.333	72.606	971.036	647.278	319.795	690.866	717.559	337.952	740.941	438.921	255.168	753.613	447.094	275.363	756.381	353.878	241.947	736.278	267.267	-209.31	664.33	702.149	-168.743	734.889	433.235	-88.9558	756.835	442.457	-100.808	763.453	346.684	-64.5757	733.168	261.54
247	2.46	68.9453	1200.63	607.559	137.843	1195.03	657.31	-5.57808	1181.37	645.21	202.957	1033.7	775.475	-100.201	1019.98	730.22	72.6663	970.941	647.158	319.842	690.856	717.538	337.973	740.922	438.938	255.164	753.601	447.094	275.372	756.374	353.888	241.956	736.276	267.287	-209.473	664.521	702.2	-168.741	734.903	433.19	-88.9694	756.848	442.495	-100.81	763.432	346.707	-64.5562	733.161	261.549
248	2.47	69.1099	1200.61	607.512	138.013	1194.95	657.3	-5.42102	1181.39	645.131	203.033	1033.66	775.495	-100.112	1020.03	730.172	72.727	970.875	647.035	319.9	690.831	717.526	338.014	740.894	438.955	255.174	753.599	447.106	275.394	756.365	353.885	241.98	736.263	267.288	-209.598	664.652	702.209	-168.724	734.903	433.171	-88.9642	756.854	442.482	-100.82	763.44	346.697	-64.5399	733.164	261.529
249	2.48	69.2514	1200.58	607.432	138.183	1194.85	657.27	-5.27881	1181.38	645.081	203.107	1033.59	775.537	-100.029	1020.06	730.127	72.8244	970.778	646.996	319.947	690.776	717.518	338.048	740.851	438.978	255.176	753.612	447.104	275.403	756.354	353.902	241.998	736.217	267.328	-209.678	664.671	702.1	-168.719	734.894	433.174	-88.9642	756.85	442.472	-100.815	763.452	346.711	-64.5266	733.156	261.528
250	2.49	69.405	1200.57	607.326	138.376	1194.79	657.3	-5.13996	1181.38	645.034	203.167	1033.52	775.554	-99.9532	1020.09	730.079	72.9331	970.677	646.927	319.958	690.698	717.487	338.074	740.824	438.991	255.193	753.635	447.101	275.414	756.358	353.913	242.022	736.205	267.356	-209.779	664.668	701.986	-168.705	734.883	433.174	-88.9601	756.864	442.474	-100.805	763.51	346.593	-64.5068	733.153	261.529
251	2.5	69.5957	1200.55	607.219	138.581	1194.74	657.276	-4.97121	1181.37	644.904	203.24	1033.48	775.57	-99.897	1020.14	730.02	73.0861	970.603	646.893	319.957	690.624	717.447	338.101	740.822	438.969	255.217	753.656	447.072	275.435	756.372	353.909	242.05	736.228	267.344	-209.85	664.679	701.862	-168.687	734.903	433.14	-88.9334	756.874	442.439	-100.763	763.584	346.427	-64.4742	733.175	261.485
252	2.51	69.7689	1200.55	607.048	138.75	1194.69	657.159	-4.79034	1181.36	644.735	203.298	1033.46	775.575	-99.8419	1020.18	729.956	73.1834	970.545	646.821	319.966	690.583	717.444	338.085	740.846	438.9	255.249	753.656	447.047	275.436	756.391	353.88	242.045	736.263	267.271	-209.916	664.725	701.812	-168.684	734.924	433.122	-88.9227	756.875	442.411	-100.724	763.587	346.414	-64.481	733.179	261.501
253	2.52	69.9215	1200.52	606.92	138.86	1194.65	657.039	-4.65063	1181.37	644.654	203.324	1033.45	775.592	-99.8015	1020.23	729.91	73.2188	970.493	646.753	319.951	690.565	717.456	338.041	740.875	438.868	255.24	753.647	447.046	275.41	756.412	353.839	242.007	736.3	267.227	-210.025	664.818	701.872	-168.708	734.93	433.14	-88.9242	756.862	442.431	-100.711	763.524	346.522	-64.4878	733.179	261.519
254	2.53	70.038	1200.47	606.84	138.965	1194.6	656.904	-4.54013	1181.38	644.607	203.342	1033.43	775.592	-99.773	1020.27	729.897	73.2408	970.452	646.745	319.926	690.524	717.468	338.003	740.902	438.852	255.21	753.641	447.067	275.389	756.427	353.835	241.951	736.337	267.197	-210.066	664.88	701.881	-168.743	734.951	433.147	-88.9417	756.854	442.458	-100.72	763.466	346.625	-64.5129	733.192	261.525
255	2.54	70.1427	1200.45	606.731	139.086	1194.53	656.843	-4.41791	1181.37	644.553	203.356	1033.4	775.595	-99.7359	1020.32	729.885	73.2614	970.422	646.737	319.907	690.467	717.471	337.97	740.911	438.867	255.189	753.616	447.099	275.375	756.43	353.854	241.926	736.353	267.217	-210.129	664.993	701.969	-168.766	734.97	433.136	-88.9723	756.845	442.464	-100.748	763.456	346.642	-64.5388	733.202	261.541
256	2.55	70.2651	1200.41	606.646	139.23	1194.47	656.825	-4.28417	1181.36	644.527	203.439	1033.37	775.638	-99.6646	1020.36	729.896	73.3279	970.36	646.877	319.92	690.405	717.48	337.973	740.888	438.925	255.195	753.606	447.138	275.391	756.426	353.901	241.941	736.336	267.255	-210.199	665.121	702.125	-168.76	734.979	433.164	-88.9779	756.834	442.468	-100.749	763.454	346.683	-64.5301	733.209	261.53
257	2.56	70.4244	1200.38	606.6	139.412	1194.4	656.838	-4.1247	1181.37	644.494	203.554	1033.34	775.68	-99.5689	1020.39	729.894	73.45	970.282	647.05	319.955	690.364	717.496	338.023	740.849	438.962	255.213	753.61	447.141	275.42	756.415	353.94	241.985	736.321	267.299	-210.209	665.241	702.224	-168.73	734.993	433.151	-88.9491	756.851	442.48	-100.749	763.477	346.659	-64.5038	733.2	261.52
258	2.57	70.5818	1200.33	606.576	139.59	1194.32	656.817	-3.95514	1181.39	644.485	203.658	1033.3	775.659	-99.4605	1020.4	729.884	73.5641	970.216	647.119	319.999	690.298	717.447	338.083	740.806	438.965	255.257	753.614	447.091	275.444	756.397	353.936	242.037	736.293	267.327	-210.176	665.322	702.271	-168.68	734.978	433.111	-88.9107	756.859	442.464	-100.74	763.527	346.542	-64.469	733.175	261.523
259	2.58	70.7317	1200.29	606.642	139.734	1194.24	656.806	-3.8073	1181.34	644.488	203.757	1033.24	775.653	-99.3711	1020.4	729.911	73.6659	970.117	647.265	320.044	690.212	717.42	338.122	740.74	438.968	255.262	753.602	447.072	275.446	756.371	353.896	242.064	736.245	267.338	-210.127	665.336	702.266	-168.657	734.958	433.089	-88.8932	756.844	442.436	-100.728	763.538	346.494	-64.4559	733.158	261.517
260	2.59	70.8561	1200.22	606.79	139.851	1194.18	656.835	-3.69531	1181.29	644.544	203.839	1033.18	775.674	-99.2914	1020.39	729.949	73.7688	969.997	647.55	320.074	690.129	717.405	338.163	740.67	439.027	255.243	753.58	447.094	275.444	756.355	353.899	242.07	736.201	267.357	-210.066	665.312	702.23	-168.654	734.912	433.141	-88.8942	756.801	442.513	-100.759	763.531	346.503	-64.4664	733.129	261.545
261	2.6	70.9452	1200.19	606.858	139.944	1194.15	656.851	-3.60348	1181.28	644.563	203.897	1033.14	775.707	-99.233	1020.39	729.987	73.824	969.942	647.671	320.084	690.078	717.396	338.153	740.647	439.028	255.224	753.565	447.103	275.433	756.343	353.907	242.046	736.192	267.376	-209.959	665.243	702.133	-168.658	734.878	433.159	-88.8845	756.776	442.538	-100.796	763.533	346.467	-64.4954	733.109	261.563
262	2.61	71.0412	1200.21	606.814	140.023	1194.15	656.838	-3.51957	1181.3	644.559	203.943	1033.14	775.684	-99.2047	1020.41	730.003	73.8498	969.99	647.587	320.071	690.059	717.377	338.116	740.676	438.987	255.235	753.567	447.088	275.42	756.365	353.89	242.004	736.218	267.324	-209.824	665.165	702.034	-168.654	734.909	433.158	-88.8785	756.775	442.503	-100.781	763.51	346.489	-64.5086	733.116	261.567
263	2.62	71.1442	1200.24	606.84	140.1	1194.17	656.87	-3.44641	1181.36	644.573	203.996	1033.15	775.681	-99.1682	1020.45	730.026	73.8739	970.06	647.471	320.094	690.063	717.372	338.075	740.74	438.915	255.259	753.578	447.08	275.412	756.4	353.889	241.973	736.278	267.252	-209.716	665.131	702.002	-168.658	734.954	433.183	-88.8721	756.783	442.5	-100.757	763.46	346.606	-64.5168	733.132	261.569
264	2.63	71.2532	1200.3	606.814	140.176	1194.19	656.905	-3.36289	1181.44	644.604	204.051	1033.16	775.689	-99.1196	1020.47	730.069	73.8624	970.211	647.277	320.145	690.064	717.388	338.05	740.79	438.854	255.273	753.591	447.066	275.397	756.437	353.862	241.944	736.354	267.216	-209.639	665.155	702.039	-168.671	735.019	433.18	-88.8541	756.801	442.467	-100.733	763.446	346.658	-64.5267	733.183	261.538
265	2.64	71.3618	1200.38	606.735	140.268	1194.21	656.933	-3.26468	1181.51	644.64	204.101	1033.17	775.706	-99.0693	1020.49	730.14	73.8386	970.369	647.096	320.197	690.047	717.404	338.033	740.817	438.79	255.274	753.64	447.047	275.392	756.468	353.846	241.92	736.403	267.186	-209.594	665.242	702.191	-168.671	735.071	433.146	-88.837	756.846	442.407	-100.721	763.485	346.606	-64.5383	733.238	261.493
266	2.65	71.4916	1200.39	606.806	140.381	1194.17	657.031	-3.15563	1181.52	644.693	204.164	1033.15	775.744	-99.0228	1020.49	730.222	73.8994	970.38	647.168	320.279	689.996	717.409	338.048	740.808	438.801	255.286	753.673	447.075	275.399	756.464	353.866	241.932	736.399	267.22	-209.521	665.271	702.31	-168.672	735.096	433.133	-88.8352	756.879	442.394	-100.741	763.512	346.606	-64.5374	733.261	261.509
267	2.66	71.6456	1200.38	606.98	140.539	1194.12	657.236	-3.0186	1181.5	644.811	204.265	1033.09	775.813	-98.9386	1020.44	730.315	74.015	970.252	647.419	320.386	689.94	717.379	338.117	740.746	438.857	255.314	753.682	447.077	275.426	756.433	353.904	241.973	736.354	267.293	-209.444	665.292	702.399	-168.625	735.079	433.17	-88.8121	756.877	442.418	-100.746	763.548	346.577	-64.4939	733.238	261.557
268	2.67	71.8193	1200.32	607.163	140.723	1194.06	657.469	-2.88006	1181.47	644.884	204.384	1033.01	775.834	-98.8341	1020.38	730.394	74.1486	970.106	647.678	320.467	689.895	717.36	338.217	740.658	438.929	255.332	753.675	447.06	275.457	756.402	353.883	242.022	736.296	267.336	-209.393	665.305	702.49	-168.847	735.308	432.681	-88.7545	756.848	442.431	-101.076	763.851	345.803	-64.8663	733.461	260.623
269	2.68	71.9964	1200.23	607.397	140.864	1194	657.61	-2.74826	1181.45	644.951	204.463	1032.92	775.797	-98.7425	1020.3	730.426	74.2224	969.998	647.843	320.537	689.862	717.323	338.277	740.583	438.957	255.366	753.638	447.053	275.467	756.374	353.869	242.069	736.247	267.347	-209.316	665.281	702.537	-169.453	735.892	431.546	-88.7127	756.783	442.421	-101.848	764.439	344.19	-65.781	734.015	258.478
270	2.69	72.1121	1200.18	607.602	140.944	1193.97	657.713	-2.65809	1181.44	645.042	204.512	1032.85	775.759	-98.7052	1020.25	730.469	74.2443	969.936	647.963	320.579	689.829	717.303	338.276	740.554	438.94	255.386	753.604	447.08	275.46	756.36	353.878	242.058	736.241	267.328	-209.264	665.256	702.641	-169.609	736.019	431.289	-88.7159	756.744	442.443	-102.039	764.561	343.851	-66.0381	734.145	257.932
271	2.7	72.1579	1200.25	607.693	141.002	1193.99	657.835	-2.62238	1181.47	645.146	204.528	1032.83	775.77	-98.704	1020.23	730.548	74.2173	969.957	647.992	320.587	689.791	717.283	338.221	740.573	438.91	255.362	753.6	447.102	275.428	756.377	353.871	241.995	736.261	267.326	-209.17	665.186	702.676	-169.678	736.055	431.28	-88.7485	756.76	442.464	-102.139	764.599	343.839	-66.1342	734.2	257.795
272	2.71	72.1736	1200.38	607.664	141.042	1194.03	657.938	-2.5968	1181.53	645.245	204.542	1032.84	775.814	-98.6902	1020.23	730.591	74.1742	970.042	647.903	320.593	689.749	717.262	338.162	740.63	438.878	255.332	753.603	447.102	275.392	756.403	353.857	241.941	736.309	267.292	-209.054	665.098	702.662	-169.702	736.054	431.295	-88.7744	756.77	442.479	-102.211	764.634	343.848	-66.1861	734.237	257.744
273	2.72	72.2162	1200.54	607.584	141.08	1194.05	657.977	-2.55794	1181.59	645.3	204.577	1032.85	775.806	-98.6662	1020.23	730.603	74.1614	970.168	647.703	320.602	689.715	717.259	338.127	740.667	438.825	255.33	753.618	447.09	275.381	756.436	353.843	241.919	736.357	267.262	-208.929	665.005	702.629	-169.685	736.061	431.307	-88.7703	756.781	442.456	-102.224	764.692	343.796	-66.208	734.284	257.707
274	2.73	72.2484	1200.66	607.513	141.138	1194.07	658.031	-2.50693	1181.63	645.34	204.646	1032.85	775.782	-98.6254	1020.22	730.634	74.1749	970.275	647.503	320.638	689.682	717.254	338.129	740.685	438.801	255.357	753.629	447.071	275.396	756.454	353.878	241.932	736.384	267.252	-208.764	664.897	702.551	-169.653	736.069	431.322	-88.7407	756.799	442.437	-102.194	764.722	343.762	-66.2105	734.313	257.678
275	2.74	72.3043	1200.69	607.592	141.22	1194.07	658.161	-2.42565	1181.63	645.423	204.738	1032.81	775.773	-98.5589	1020.17	730.662	74.2175	970.274	647.535	320.697	689.644	717.257	338.169	740.67	438.823	255.387	753.612	447.076	275.426	756.445	353.912	241.945	736.386	267.241	-208.592	664.781	702.452	-169.618	736.074	431.325	-88.6982	756.795	442.439	-102.159	764.727	343.765	-66.1988	734.324	257.684
276	2.75	72.3799	1200.66	607.798	141.288	1194.06	658.265	-2.35916	1181.6	645.554	204.819	1032.75	775.79	-98.4874	1020.1	730.694	74.2414	970.216	647.671	320.74	689.579	717.237	338.21	740.624	438.842	255.395	753.594	447.087	275.451	756.424	353.912	241.969	736.341	267.287	-208.436	664.696	702.394	-169.598	736.078	431.327	-88.6657	756.785	442.445	-102.129	764.711	343.763	-66.1785	734.275	257.73
277	2.76	72.4206	1200.61	607.998	141.325	1194.05	658.354	-2.31837	1181.58	645.677	204.89	1032.69	775.799	-98.4249	1020.04	730.763	74.2609	970.151	647.833	320.76	689.525	717.237	338.232	740.564	438.906	255.36	753.577	447.091	275.456	756.398	353.931	241.976	736.291	267.316	-208.321	664.633	702.451	-169.583	736.072	431.358	-88.6573	756.771	442.471	-102.122	764.683	343.814	-66.2001	734.245	257.767
278	2.77	72.4496	1200.55	608.252	141.346	1194.03	658.422	-2.29125	1181.54	645.811	204.949	1032.64	775.808	-98.3785	1019.97	730.831	74.2744	970.084	648.029	320.782	689.477	717.216	338.24	740.506	438.975	255.334	753.559	447.094	275.449	756.371	353.956	241.982	736.253	267.34	-208.215	664.587	702.546	-169.58	736.064	431.395	-88.6472	756.753	442.494	-102.135	764.663	343.855	-66.2079	734.216	257.814
279	2.78	72.4739	1200.52	608.386	141.368	1194.03	658.451	-2.27263	1181.52	645.894	205.015	1032.6	775.768	-98.3185	1019.93	730.861	74.3027	970.049	648.132	320.786	689.45	717.206	338.252	740.486	438.981	255.347	753.546	447.098	275.444	756.362	353.926	241.992	736.235	267.343	-208.066	664.514	702.464	-169.576	736.06	431.391	-88.6175	756.719	442.491	-102.11	764.622	343.884	-66.2066	734.191	257.807
280	2.79	72.4702	1200.56	608.38	141.388	1194.04	658.451	-2.25766	1181.51	645.91	205.067	1032.58	775.732	-98.2828	1019.9	730.866	74.3368	970.04	648.094	320.784	689.426	717.183	338.259	740.491	438.939	255.37	753.54	447.08	275.445	756.364	353.88	241.998	736.245	267.312	-207.936	664.415	702.351	-169.566	736.047	431.376	-88.6013	756.703	442.467	-102.095	764.606	343.886	-66.1913	734.186	257.769
281	2.8	72.4329	1200.61	608.334	141.371	1194.09	658.429	-2.28319	1181.53	645.902	205.097	1032.58	775.72	-98.259	1019.91	730.891	74.3407	970.098	648.003	320.764	689.416	717.179	338.247	740.522	438.906	255.361	753.546	447.071	275.442	756.392	353.877	241.975	736.291	267.299	-207.846	664.339	702.293	-169.553	736.048	431.419	-88.6005	756.708	442.486	-102.108	764.621	343.907	-66.192	734.214	257.751
282	2.81	72.365	1200.73	608.244	141.339	1194.14	658.432	-2.32268	1181.57	645.946	205.11	1032.6	775.739	-98.2438	1019.92	730.929	74.3328	970.199	647.943	320.745	689.394	717.17	338.205	740.564	438.879	255.352	753.566	447.086	275.43	756.432	353.91	241.941	736.337	267.287	-207.743	664.265	702.215	-169.554	736.069	431.477	-88.6063	756.733	442.5	-102.119	764.655	343.913	-66.2212	734.275	257.727
283	2.82	72.3076	1200.83	608.111	141.3	1194.18	658.407	-2.33662	1181.59	645.988	205.126	1032.61	775.708	-98.234	1019.94	730.953	74.3383	970.279	647.891	320.755	689.372	717.172	338.182	740.591	438.834	255.355	753.601	447.081	275.429	756.455	353.905	241.932	736.359	267.245	-207.692	664.229	702.22	-169.544	736.08	431.499	-88.6168	756.753	442.481	-102.129	764.673	343.914	-66.228	734.304	257.716
284	2.83	72.2708	1200.88	608.094	141.285	1194.2	658.361	-2.35181	1181.6	646.042	205.158	1032.62	775.697	-98.1949	1019.92	730.965	74.3342	970.326	647.858	320.779	689.359	717.159	338.192	740.588	438.844	255.366	753.6	447.083	275.444	756.457	353.928	241.942	736.37	267.235	-207.667	664.254	702.297	-169.528	736.085	431.486	-88.5954	756.765	442.439	-102.126	764.692	343.882	-66.2166	734.305	257.704
285	2.84	72.2326	1200.89	608.12	141.286	1194.21	658.363	-2.37323	1181.6	646.06	205.192	1032.63	775.685	-98.1612	1019.9	730.975	74.329	970.351	647.819	320.798	689.364	717.159	338.213	740.578	438.862	255.376	753.59	447.089	275.447	756.45	353.931	241.955	736.358	267.244	-207.639	664.271	702.335	-169.528	736.088	431.449	-88.5747	756.767	442.441	-102.117	764.703	343.884	-66.2112	734.31	257.678
286	2.85	72.1848	1200.89	608.121	141.277	1194.21	658.345	-2.39255	1181.61	646.043	205.219	1032.61	775.614	-98.1253	1019.87	730.973	74.3255	970.33	647.856	320.85	689.358	717.165	338.228	740.562	438.868	255.382	753.586	447.07	275.437	756.436	353.905	241.965	736.333	267.257	-207.623	664.265	702.327	-169.519	736.086	431.406	-88.5798	756.766	442.436	-102.114	764.688	343.894	-66.2135	734.306	257.68
287	2.86	72.1187	1200.9	608.123	141.26	1194.22	658.345	-2.4206	1181.6	646.08	205.229	1032.6	775.579	-98.0987	1019.82	730.964	74.3009	970.344	647.864	320.9	689.347	717.145	338.249	740.532	438.887	255.385	753.568	447.067	275.455	756.412	353.928	241.974	736.312	267.286	-207.625	664.278	702.378	-169.527	736.079	431.402	-88.5836	756.759	442.415	-102.115	764.672	343.882	-66.2225	734.292	257.709
288	2.87	72.0482	1200.89	608.21	141.215	1194.24	658.387	-2.46616	1181.58	646.126	205.234	1032.58	775.576	-98.0899	1019.79	730.992	74.2811	970.324	647.975	320.92	689.348	717.148	338.247	740.508	438.928	255.366	753.547	447.079	275.452	756.392	353.934	241.969	736.28	267.323	-207.601	664.239	702.369	-169.559	736.065	431.46	-88.5895	756.738	442.441	-102.117	764.655	343.923	-66.2609	734.261	257.731
289	2.88	71.9996	1200.88	608.309	141.173	1194.23	658.398	-2.50995	1181.56	646.176	205.234	1032.57	775.572	-98.0819	1019.75	731.002	74.2813	970.288	648.087	320.927	689.337	717.138	338.243	740.48	438.949	255.346	753.536	447.094	275.435	756.372	353.935	241.955	736.26	267.35	-207.591	664.185	702.331	-169.59	736.042	431.491	-88.6006	756.711	442.486	-102.129	764.633	343.928	-66.2654	734.22	257.77
290	2.89	71.9786	1200.89	608.319	141.159	1194.23	658.38	-2.52806	1181.53	646.177	205.247	1032.57	775.535	-98.0749	1019.72	730.976	74.3034	970.275	648.064	320.929	689.307	717.078	338.242	740.465	438.914	255.35	753.543	447.066	275.433	756.37	353.904	241.969	736.248	267.35	-207.586	664.127	702.264	-169.569	736.034	431.455	-88.5942	756.685	442.486	-102.117	764.626	343.899	-66.2362	734.207	257.763
291	2.9	71.9418	1200.93	608.261	141.138	1194.25	658.356	-2.55989	1181.52	646.169	205.236	1032.57	775.474	-98.072	1019.68	730.939	74.3083	970.324	647.986	320.93	689.302	717.058	338.238	740.473	438.88	255.374	753.542	447.063	275.435	756.374	353.875	241.973	736.262	267.31	-207.604	664.123	702.314	-169.557	736.044	431.441	-88.5919	756.672	442.499	-102.108	764.613	343.912	-66.2197	734.211	257.749
292	2.91	71.8758	1201.02	608.204	141.079	1194.31	658.312	-2.61181	1181.56	646.128	205.215	1032.59	775.44	-98.0784	1019.69	730.906	74.2642	970.456	647.819	320.921	689.315	717.072	338.219	740.511	438.88	255.387	753.566	447.066	275.435	756.41	353.901	241.955	736.296	267.287	-207.612	664.1	702.317	-169.56	736.063	431.458	-88.5971	756.703	442.508	-102.126	764.645	343.908	-66.2322	734.245	257.761
293	2.92	71.8366	1201.08	608.129	141.038	1194.34	658.261	-2.65766	1181.58	646.073	205.195	1032.61	775.399	-98.1163	1019.69	730.865	74.2149	970.598	647.624	320.905	689.313	717.085	338.203	740.554	438.863	255.397	753.599	447.076	275.424	756.435	353.889	241.947	736.342	267.28	-207.615	664.067	702.298	-169.553	736.07	431.476	-88.6085	756.744	442.459	-102.139	764.688	343.882	-66.2428	734.277	257.729
294	2.93	71.7938	1201.12	608.046	141.006	1194.36	658.211	-2.70483	1181.59	646.015	205.184	1032.61	775.347	-98.1364	1019.67	730.822	74.1791	970.656	647.56	320.892	689.307	717.072	338.194	740.56	438.858	255.402	753.605	447.069	275.434	756.43	353.882	241.951	736.347	267.276	-207.577	663.989	702.218	-169.542	736.057	431.48	-88.6076	756.744	442.416	-102.129	764.679	343.878	-66.2368	734.289	257.692
295	2.94	71.7566	1201.1	608.082	140.975	1194.37	658.196	-2.73929	1181.58	646.002	205.181	1032.61	775.314	-98.1441	1019.64	730.821	74.1643	970.626	647.64	320.898	689.304	717.061	338.222	740.539	438.888	255.4	753.578	447.08	275.439	756.407	353.902	241.964	736.325	267.307	-207.561	663.963	702.234	-169.543	736.033	431.47	-88.6093	756.74	442.418	-102.134	764.675	343.898	-66.2382	734.27	257.724
296	2.95	71.7075	1201.08	608.14	140.949	1194.38	658.205	-2.77507	1181.58	645.998	205.156	1032.62	775.292	-98.1574	1019.63	730.812	74.1347	970.579	647.743	320.913	689.328	717.079	338.235	740.522	438.909	255.39	753.557	447.104	275.454	756.389	353.913	241.972	736.294	267.318	-207.542	663.983	702.279	-169.555	736.031	431.46	-88.6254	756.744	442.446	-102.137	764.658	343.935	-66.2398	734.254	257.741
297	2.96	71.6511	1201.1	608.135	140.916	1194.4	658.207	-2.81686	1181.6	645.967	205.129	1032.62	775.249	-98.1862	1019.61	730.781	74.1034	970.615	647.693	320.886	689.363	717.124	338.231	740.515	438.91	255.37	753.545	447.11	275.463	756.381	353.928	241.966	736.293	267.309	-207.524	663.986	702.277	-169.558	736.044	431.448	-88.6221	756.748	442.429	-102.138	764.651	343.921	-66.2482	734.252	257.744
298	2.97	71.5998	1201.12	608.113	140.874	1194.42	658.2	-2.86511	1181.61	645.954	205.103	1032.63	775.237	-98.2166	1019.61	730.772	74.0667	970.662	647.681	320.864	689.384	717.152	338.227	740.518	438.916	255.363	753.555	447.086	275.455	756.385	353.921	241.965	736.286	267.32	-207.481	663.951	702.253	-169.557	736.051	431.449	-88.6067	756.754	442.434	-102.149	764.683	343.918	-66.2522	734.258	257.732
299	2.98	71.5413	1201.12	608.143	140.816	1194.45	658.147	-2.91113	1181.62	645.98	205.064	1032.65	775.22	-98.2525	1019.61	730.786	74.0431	970.659	647.702	320.829	689.396	717.151	338.222	740.527	438.917	255.362	753.562	447.077	275.45	756.398	353.905	241.972	736.301	267.306	-207.456	663.907	702.255	-169.553	736.038	431.485	-88.5952	756.751	442.434	-102.136	764.678	343.923	-66.2425	734.253	257.731
300	2.99	71.4896	1201.12	608.152	140.763	1194.45	658.11	-2.95446	1181.61	645.945	205.025	1032.66	775.168	-98.2972	1019.58	730.751	74.0119	970.669	647.672	320.77	689.401	717.157	338.217	740.532	438.906	255.365	753.57	447.068	275.442	756.412	353.867	241.969	736.312	267.273	-207.447	663.867	702.252	-169.552	736.026	431.483	-88.5904	756.731	442.424	-102.136	764.668	343.908	-66.2263	734.258	257.722
301	3	71.4303	1201.13	608.114	140.701	1194.45	658.097	-2.99587	1181.6	645.903	204.982	1032.68	775.144	-98.3468	1019.56	730.703	73.974	970.672	647.657	320.698	689.426	717.199	338.211	740.534	438.889	255.355	753.579	447.062	275.428	756.42	353.855	241.972	736.31	267.251	-207.441	663.825	702.23	-169.546	736.022	431.437	-88.591	756.709	442.428	-102.137	764.667	343.884	-66.2192	734.254	257.718
302	3.01	71.3482	1201.11	608.179	140.623	1194.48	658.058	-3.07413	1181.6	645.908	204.914	1032.7	775.144	-98.3958	1019.56	730.702	73.9068	970.704	647.623	320.644	689.453	717.218	338.187	740.549	438.892	255.322	753.577	447.087	275.418	756.426	353.865	241.959	736.312	267.258	-207.401	663.754	702.139	-169.56	736.027	431.438	-88.6042	756.722	442.425	-102.151	764.659	343.873	-66.2305	734.242	257.727
303	3.02	71.2417	1201.11	608.232	140.528	1194.51	658.003	-3.18082	1181.62	645.919	204.851	1032.72	775.133	-98.4546	1019.57	730.705	73.8161	970.757	647.569	320.618	689.456	717.209	338.153	740.568	438.889	255.308	753.574	447.111	275.409	756.429	353.877	241.937	736.321	267.248	-207.424	663.741	702.195	-169.591	736.017	431.46	-88.6388	756.738	442.457	-102.172	764.655	343.911	-66.2633	734.266	257.711
304	3.03	71.1523	1201.11	608.18	140.425	1194.52	657.897	-3.28364	1181.63	645.884	204.797	1032.73	775.103	-98.5106	1019.56	730.685	73.7172	970.865	647.437	320.599	689.448	717.21	338.118	740.605	438.855	255.313	753.569	447.09	275.421	756.437	353.881	241.933	736.332	267.231	-207.459	663.743	702.242	-169.606	735.998	431.47	-88.6558	756.75	442.436	-102.19	764.692	343.899	-66.2693	734.296	257.687
305	3.04	71.0612	1201.08	608.148	140.321	1194.52	657.819	-3.38811	1181.62	645.824	204.744	1032.74	775.074	-98.5593	1019.54	730.684	73.6257	970.933	647.314	320.582	689.447	717.204	338.1	740.605	438.851	255.308	753.548	447.082	275.419	756.42	353.87	241.935	736.327	267.23	-207.483	663.714	702.215	-169.602	735.982	431.457	-88.6594	756.747	442.406	-102.194	764.702	343.852	-66.2806	734.302	257.684
306	3.05	70.9429	1201.05	608.17	140.237	1194.51	657.818	-3.4814	1181.59	645.823	204.681	1032.76	775.089	-98.6004	1019.51	730.728	73.5561	970.936	647.35	320.571	689.469	717.212	338.104	740.595	438.9	255.288	753.523	447.093	275.418	756.395	353.897	241.938	736.301	267.266	-207.523	663.745	702.27	-169.62	735.967	431.458	-88.6742	756.74	442.419	-102.206	764.693	343.888	-66.2999	734.284	257.687
307	3.06	70.8358	1201.01	608.266	140.163	1194.5	657.83	-3.57811	1181.55	645.881	204.628	1032.76	775.104	-98.6368	1019.47	730.782	73.5022	970.909	647.426	320.578	689.495	717.231	338.123	740.585	438.967	255.272	753.527	447.098	275.422	756.381	353.909	241.942	736.282	267.298	-207.589	663.818	702.405	-169.634	735.979	431.477	-88.6811	756.749	442.463	-102.195	764.684	343.906	-66.2767	734.263	257.718
308	3.07	70.7756	1200.99	608.298	140.102	1194.52	657.856	-3.66591	1181.52	645.897	204.58	1032.77	775.112	-98.6692	1019.46	730.804	73.4574	970.892	647.504	320.555	689.519	717.233	338.152	740.582	438.967	255.281	753.549	447.12	275.432	756.395	353.902	241.956	736.278	267.315	-207.623	663.825	702.408	-169.624	736.013	431.455	-88.6765	756.763	442.486	-102.169	764.667	343.874	-66.2524	734.254	257.763
309	3.08	70.7153	1200.98	608.314	140.027	1194.52	657.846	-3.71934	1181.48	645.851	204.528	1032.79	775.122	-98.7113	1019.42	730.795	73.4326	970.903	647.551	320.525	689.562	717.247	338.179	740.594	438.958	255.3	753.565	447.116	275.455	756.401	353.907	241.988	736.276	267.312	-207.641	663.78	702.393	-169.615	736.021	431.427	-88.6585	756.765	442.49	-102.156	764.668	343.837	-66.2179	734.254	257.805
310	3.09	70.6591	1200.95	608.305	139.942	1194.52	657.846	-3.78472	1181.43	645.823	204.486	1032.79	775.108	-98.7524	1019.38	730.796	73.4199	970.904	647.557	320.481	689.583	717.266	338.187	740.603	438.949	255.327	753.567	447.07	275.455	756.398	353.894	242.003	736.271	267.275	-207.682	663.757	702.439	-169.597	736.004	431.41	-88.6418	756.75	442.476	-102.147	764.675	343.854	-66.1898	734.236	257.82
311	3.1	70.5755	1200.92	608.25	139.838	1194.53	657.845	-3.8828	1181.38	645.792	204.433	1032.81	775.099	-98.8176	1019.34	730.808	73.3629	970.943	647.5	320.444	689.594	717.268	338.18	740.604	438.938	255.347	753.559	447.059	275.438	756.387	353.86	241.996	736.279	267.243	-207.685	663.677	702.426	-169.594	735.973	431.413	-88.6479	756.742	442.466	-102.14	764.652	343.858	-66.1855	734.234	257.806
312	3.11	70.4036	1200.9	608.26	139.713	1194.54	657.847	-4.03199	1181.38	645.828	204.336	1032.84	775.103	-98.9032	1019.31	730.822	73.2133	970.976	647.529	320.432	689.632	717.266	338.141	740.623	438.917	255.316	753.543	447.091	275.428	756.378	353.867	241.971	736.284	267.262	-207.658	663.59	702.343	-169.628	735.937	431.455	-88.6808	756.727	442.49	-102.183	764.65	343.877	-66.2118	734.234	257.792
313	3.12	70.2091	1200.89	608.3	139.57	1194.56	657.869	-4.21596	1181.39	645.936	204.23	1032.89	775.148	-98.9906	1019.3	730.881	73.0562	971.001	647.62	320.435	689.686	717.272	338.087	740.658	438.933	255.264	753.528	447.133	275.407	756.382	353.9	241.918	736.288	267.287	-207.629	663.534	702.322	-169.68	735.926	431.501	-88.7387	756.718	442.521	-102.222	764.679	343.898	-66.2782	734.253	257.79
314	3.13	70.0738	1200.9	608.287	139.438	1194.58	657.855	-4.36926	1181.41	645.993	204.159	1032.95	775.178	-99.0517	1019.28	730.9	72.9383	971.041	647.678	320.441	689.737	717.289	338.059	740.687	438.948	255.236	753.544	447.147	275.391	756.378	353.907	241.903	736.298	267.287	-207.599	663.51	702.369	-169.699	735.923	431.512	-88.7536	756.725	442.557	-102.251	764.71	343.902	-66.3067	734.28	257.788
315	3.14	69.9824	1200.94	608.167	139.345	1194.6	657.837	-4.4781	1181.41	645.986	204.111	1032.99	775.166	-99.0887	1019.25	730.909	72.8974	971.084	647.669	320.45	689.78	717.307	338.057	740.714	438.921	255.235	753.548	447.132	275.408	756.383	353.893	241.93	736.303	267.285	-207.579	663.492	702.451	-169.677	735.925	431.48	-88.7286	756.738	442.507	-102.237	764.726	343.89	-66.2927	734.292	257.779
316	3.15	69.8923	1200.95	608.11	139.276	1194.6	657.831	-4.56521	1181.4	645.98	204.073	1033.01	775.149	-99.1394	1019.21	730.912	72.8684	971.111	647.657	320.439	689.823	717.319	338.071	740.715	438.895	255.254	753.569	447.105	275.421	756.392	353.906	241.951	736.295	267.285	-207.576	663.478	702.516	-169.649	735.935	431.436	-88.6978	756.763	442.459	-102.192	764.719	343.872	-66.2688	734.3	257.749
317	3.16	69.7944	1200.95	608.123	139.182	1194.62	657.839	-4.65622	1181.39	646.001	204.015	1033.03	775.131	-99.19	1019.18	730.927	72.8208	971.145	647.648	320.422	689.876	717.344	338.086	740.704	438.866	255.266	753.596	447.086	275.413	756.394	353.89	241.959	736.296	267.269	-207.566	663.459	702.566	-169.637	735.949	431.425	-88.6872	756.776	442.454	-102.19	764.718	343.882	-66.2642	734.315	257.712
318	3.17	69.6883	1200.94	608.178	139.074	1194.64	657.851	-4.78627	1181.4	646.059	203.952	1033.07	775.119	-99.2469	1019.16	730.969	72.7302	971.148	647.747	320.404	689.944	717.364	338.073	740.711	438.876	255.255	753.595	447.095	275.404	756.403	353.881	241.955	736.302	267.266	-207.518	663.422	702.587	-169.646	735.963	431.444	-88.6955	756.784	442.464	-102.213	764.73	343.885	-66.2735	734.311	257.737
319	3.18	69.5373	1200.9	608.291	138.957	1194.65	657.876	-4.92226	1181.39	646.106	203.886	1033.09	775.123	-99.316	1019.11	730.988	72.6361	971.09	647.902	320.364	689.984	717.347	338.053	740.721	438.89	255.222	753.584	447.1	275.376	756.405	353.861	241.944	736.286	267.254	-207.479	663.355	702.618	-169.671	735.952	431.45	-88.724	756.761	442.476	-102.242	764.715	343.91	-66.3029	734.29	257.763
320	3.19	69.3945	1200.86	608.387	138.825	1194.65	657.892	-5.04466	1181.35	646.18	203.822	1033.09	775.113	-99.3919	1019.04	730.998	72.5732	971.057	647.993	320.328	689.986	717.317	338.048	740.709	438.901	255.195	753.55	447.091	275.37	756.388	353.867	241.931	736.257	267.256	-207.485	663.294	702.615	-169.687	735.921	431.471	-88.7324	756.711	442.529	-102.249	764.673	343.934	-66.3063	734.256	257.786
321	3.2	69.291	1200.87	608.361	138.711	1194.65	657.868	-5.15214	1181.32	646.216	203.766	1033.08	775.102	-99.4495	1018.98	731.029	72.5395	971.039	648.063	320.306	689.991	717.308	338.062	740.684	438.932	255.197	753.531	447.09	275.383	756.365	353.855	241.931	736.226	267.248	-207.47	663.181	702.567	-169.689	735.874	431.47	-88.729	756.675	442.557	-102.25	764.648	343.906	-66.2934	734.227	257.76
322	3.21	69.1868	1200.91	608.347	138.615	1194.68	657.841	-5.24282	1181.32	646.221	203.72	1033.09	775.08	-99.5045	1018.95	731.041	72.5174	971.068	648.064	320.3	689.998	717.287	338.072	740.691	438.927	255.231	753.541	447.085	275.397	756.359	353.853	241.938	736.224	267.24	-207.439	663.08	702.563	-169.678	735.847	431.454	-88.7212	756.681	442.535	-102.238	764.653	343.859	-66.274	734.237	257.748
323	3.22	69.064	1200.96	608.341	138.506	1194.74	657.838	-5.357	1181.33	646.232	203.676	1033.15	775.098	-99.5474	1018.95	731.088	72.4869	971.104	648.12	320.313	690.02	717.295	338.055	740.733	438.932	255.238	753.556	447.11	275.411	756.384	353.872	241.947	736.251	267.261	-207.373	662.983	702.458	-169.677	735.862	431.467	-88.7301	756.718	442.542	-102.253	764.704	343.852	-66.2795	734.281	257.746
324	3.23	68.9165	1201.03	608.33	138.384	1194.8	657.82	-5.46192	1181.36	646.211	203.641	1033.21	775.124	-99.591	1018.97	731.12	72.4498	971.163	648.159	320.328	690.077	717.327	338.037	740.775	438.959	255.234	753.58	447.141	275.414	756.408	353.888	241.949	736.291	267.284	-207.364	662.995	702.516	-169.681	735.907	431.497	-88.7277	756.764	442.545	-102.252	764.747	343.891	-66.2851	734.321	257.758
325	3.24	68.7997	1201.09	608.336	138.277	1194.84	657.763	-5.54241	1181.36	646.206	203.608	1033.25	775.093	-99.6448	1018.97	731.141	72.4038	971.219	648.106	320.334	690.122	717.352	338.027	740.807	438.923	255.237	753.606	447.138	275.422	756.426	353.914	241.962	736.314	267.297	-207.347	662.985	702.525	-169.671	735.915	431.503	-88.7299	756.779	442.527	-102.252	764.763	343.891	-66.2905	734.354	257.735
326	3.25	68.7071	1201.09	608.346	138.164	1194.85	657.723	-5.62293	1181.33	646.216	203.577	1033.25	775.068	-99.7002	1018.94	731.147	72.366	971.214	648.116	320.305	690.168	717.372	338.023	740.788	438.909	255.236	753.603	447.116	275.416	756.424	353.904	241.96	736.315	267.289	-207.377	663.003	702.574	-169.668	735.908	431.472	-88.7278	756.78	442.468	-102.245	764.758	343.89	-66.2917	734.337	257.729
327	3.26	68.6114	1201.04	608.403	138.053	1194.83	657.704	-5.69922	1181.28	646.248	203.53	1033.23	775.082	-99.7395	1018.89	731.173	72.3319	971.156	648.218	320.273	690.209	717.389	338.024	740.76	438.922	255.246	753.578	447.122	275.41	756.394	353.905	241.957	736.275	267.296	-207.417	663.049	702.675	-169.675	735.879	431.471	-88.7274	756.763	442.447	-102.244	764.717	343.923	-66.2869	734.29	257.744
328	3.27	68.5358	1200.96	608.557	137.966	1194.82	657.721	-5.77615	1181.23	646.265	203.482	1033.24	775.087	-99.7897	1018.84	731.181	72.2759	971.113	648.283	320.248	690.246	717.387	338.033	740.747	438.936	255.222	753.564	447.127	275.393	756.369	353.879	241.94	736.24	267.295	-207.457	663.072	702.746	-169.694	735.872	431.497	-88.7361	756.755	442.5	-102.258	764.712	343.893	-66.278	734.268	257.784
329	3.28	68.4601	1200.92	608.617	137.874	1194.81	657.703	-5.85709	1181.19	646.257	203.435	1033.25	775.078	-99.8401	1018.82	731.204	72.2286	971.087	648.316	320.241	690.247	717.35	338.014	740.744	438.909	255.201	753.543	447.122	275.372	756.351	353.847	241.928	736.24	267.277	-207.458	662.998	702.671	-169.715	735.861	431.486	-88.7656	756.741	442.503	-102.283	764.695	343.865	-66.2919	734.249	257.81
330	3.29	68.3997	1200.9	608.646	137.807	1194.82	657.661	-5.93981	1181.15	646.256	203.397	1033.24	775.067	-99.8768	1018.79	731.224	72.1711	971.076	648.359	320.227	690.244	717.302	338.015	740.733	438.904	255.193	753.539	447.126	275.363	756.349	353.839	241.938	736.238	267.278	-207.402	662.845	702.437	-169.744	735.847	431.472	-88.7832	756.712	442.5	-102.296	764.691	343.83	-66.3137	734.23	257.806
331	3.3	68.3571	1200.91	608.648	137.76	1194.84	657.661	-5.98973	1181.14	646.256	203.372	1033.26	775.073	-99.9071	1018.78	731.247	72.1493	971.087	648.371	320.21	690.266	717.307	338.029	740.748	438.918	255.178	753.54	447.118	275.382	756.359	353.853	241.939	736.241	267.293	-207.379	662.776	702.365	-169.744	735.835	431.475	-88.7844	756.705	442.528	-102.284	764.686	343.869	-66.3066	734.234	257.816
332	3.31	68.3068	1200.96	608.55	137.71	1194.87	657.644	-6.03164	1181.14	646.203	203.347	1033.28	775.052	-99.9402	1018.78	731.25	72.1205	971.146	648.339	320.205	690.273	717.343	338.018	740.774	438.908	255.184	753.556	447.122	275.394	756.371	353.864	241.93	736.262	267.282	-207.413	662.78	702.425	-169.73	735.826	431.481	-88.7792	756.72	442.553	-102.286	764.704	343.874	-66.3002	734.272	257.774
333	3.32	68.2564	1201.03	608.43	137.672	1194.9	657.635	-6.08111	1181.14	646.152	203.317	1033.3	775.042	-99.9818	1018.79	731.241	72.0836	971.216	648.202	320.181	690.267	717.339	338	740.795	438.877	255.193	753.592	447.104	275.394	756.396	353.87	241.928	736.284	267.27	-207.423	662.74	702.382	-169.718	735.835	431.474	-88.7865	756.743	442.568	-102.299	764.736	343.856	-66.3218	734.333	257.719
334	3.33	68.207	1201.05	608.408	137.639	1194.92	657.647	-6.13202	1181.13	646.165	203.272	1033.34	775.049	-100.021	1018.81	731.26	72.056	971.244	648.236	320.16	690.299	717.347	337.984	740.822	438.887	255.186	753.612	447.118	275.388	756.411	353.874	241.923	736.299	267.28	-207.429	662.748	702.374	-169.729	735.851	431.492	-88.8095	756.764	442.564	-102.301	764.755	343.881	-66.3548	734.375	257.719
335	3.34	68.1702	1201.02	608.424	137.608	1194.91	657.628	-6.16667	1181.14	646.177	203.243	1033.36	775.051	-100.052	1018.81	731.277	72.0172	971.24	648.271	320.159	690.346	717.371	337.976	740.828	438.887	255.169	753.606	447.126	275.376	756.409	353.866	241.914	736.299	267.276	-207.462	662.844	702.545	-169.747	735.864	431.485	-88.8128	756.763	442.567	-102.31	764.758	343.874	-66.3629	734.375	257.724
336	3.35	68.1548	1200.96	608.417	137.595	1194.89	657.606	-6.18546	1181.13	646.135	203.235	1033.35	775.028	-100.075	1018.8	731.267	71.9771	971.218	648.25	320.145	690.379	717.399	337.968	740.819	438.877	255.173	753.583	447.109	275.37	756.394	353.819	241.908	736.274	267.261	-207.506	662.934	702.715	-169.74	735.855	431.461	-88.7848	756.762	442.505	-102.288	764.735	343.837	-66.3386	734.34	257.74
337	3.36	68.1619	1200.87	608.464	137.585	1194.85	657.624	-6.17549	1181.08	646.109	203.241	1033.33	775.01	-100.076	1018.75	731.269	71.9643	971.145	648.367	320.126	690.396	717.402	337.992	740.788	438.872	255.176	753.555	447.099	275.379	756.367	353.826	241.932	736.245	267.253	-207.517	662.961	702.766	-169.728	735.831	431.441	-88.7605	756.747	442.51	-102.28	764.72	343.843	-66.2992	734.283	257.782
338	3.37	68.173	1200.81	608.544	137.592	1194.83	657.652	-6.17408	1181.06	646.097	203.229	1033.33	774.997	-100.082	1018.73	731.276	71.9626	971.12	648.384	320.115	690.382	717.391	338.021	740.781	438.925	255.177	753.549	447.105	275.391	756.359	353.862	241.955	736.233	267.275	-207.479	662.905	702.669	-169.727	735.833	431.439	-88.7618	756.74	442.533	-102.277	764.708	343.873	-66.3028	734.26	257.806
339	3.38	68.1657	1200.84	608.486	137.578	1194.84	657.63	-6.19226	1181.07	646.086	203.211	1033.34	774.995	-100.094	1018.73	731.279	71.9563	971.148	648.4	320.111	690.368	717.385	338.015	740.795	438.94	255.192	753.571	447.11	275.386	756.368	353.87	241.946	736.247	267.287	-207.469	662.837	702.602	-169.731	735.853	431.477	-88.7562	756.753	442.511	-102.288	764.72	343.876	-66.32	734.293	257.796
340	3.39	68.1547	1200.88	608.36	137.57	1194.87	657.607	-6.20667	1181.08	646.034	203.205	1033.36	774.986	-100.103	1018.75	731.279	71.952	971.223	648.282	320.089	690.343	717.373	338.011	740.809	438.929	255.206	753.587	447.105	275.39	756.385	353.872	241.939	736.259	267.286	-207.486	662.847	702.675	-169.728	735.863	431.486	-88.7634	756.774	442.525	-102.28	764.737	343.877	-66.2985	734.312	257.811
341	3.4	68.1677	1200.9	608.321	137.592	1194.86	657.597	-6.21094	1181.06	645.973	203.22	1033.36	774.958	-100.094	1018.75	731.274	71.9745	971.243	648.29	320.081	690.297	717.339	338.027	740.818	438.93	255.224	753.579	447.122	275.409	756.397	353.876	241.954	736.274	267.286	-207.439	662.782	702.592	-169.72	735.848	431.449	-88.7684	756.771	442.528	-102.275	764.73	343.882	-66.2801	734.313	257.839
342	3.41	68.1817	1200.87	608.314	137.599	1194.84	657.581	-6.21832	1181.04	645.974	203.231	1033.35	774.933	-100.091	1018.75	731.27	71.9787	971.229	648.295	320.081	690.272	717.339	338.024	740.797	438.93	255.217	753.573	447.136	275.413	756.398	353.885	241.962	736.278	267.28	-207.354	662.66	702.382	-169.714	735.825	431.437	-88.772	756.753	442.52	-102.279	764.732	343.868	-66.2668	734.307	257.844
343	3.42	68.1668	1200.83	608.314	137.586	1194.82	657.563	-6.2335	1181.01	645.991	203.232	1033.34	774.922	-100.109	1018.74	731.294	71.9609	971.21	648.284	320.076	690.266	717.345	338.019	740.774	438.94	255.201	753.565	447.139	275.403	756.382	353.875	241.96	736.264	267.272	-207.359	662.667	702.399	-169.724	735.825	431.461	-88.7849	756.741	442.533	-102.311	764.729	343.873	-66.2816	734.287	257.825
344	3.43	68.1608	1200.79	608.333	137.585	1194.8	657.536	-6.24202	1180.99	645.998	203.227	1033.34	774.918	-100.118	1018.72	731.304	71.936	971.173	648.321	320.086	690.282	717.349	338.018	740.758	438.945	255.18	753.549	447.153	275.389	756.378	353.869	241.938	736.241	267.272	-207.361	662.722	702.502	-169.732	735.829	431.483	-88.791	756.74	442.548	-102.308	764.721	343.895	-66.279	734.272	257.833
345	3.44	68.1521	1200.73	608.415	137.578	1194.77	657.499	-6.24572	1181	646.003	203.222	1033.33	774.883	-100.118	1018.72	731.307	71.921	971.14	648.391	320.104	690.311	717.376	338.009	740.764	438.963	255.167	753.542	447.127	275.367	756.374	353.863	241.919	736.244	267.293	-207.367	662.808	702.639	-169.735	735.845	431.498	-88.803	756.748	442.569	-102.297	764.723	343.899	-66.3052	734.264	257.821
346	3.45	68.1415	1200.7	608.351	137.574	1194.75	657.455	-6.21722	1181	645.965	203.234	1033.33	774.842	-100.103	1018.72	731.291	71.9019	971.139	648.355	320.106	690.333	717.401	337.987	740.75	438.95	255.156	753.541	447.136	275.366	756.363	353.836	241.925	736.241	267.274	-207.397	662.88	702.737	-169.727	735.837	431.473	-88.805	756.761	442.547	-102.301	764.721	343.893	-66.3318	734.252	257.819
347	3.46	68.1783	1200.69	608.261	137.589	1194.74	657.402	-6.19613	1180.99	645.913	203.254	1033.32	774.812	-100.086	1018.71	731.276	71.9109	971.152	648.275	320.091	690.334	717.402	337.99	740.732	438.902	255.166	753.536	447.114	275.379	756.36	353.821	241.935	736.24	267.243	-207.414	662.919	702.779	-169.714	735.819	431.429	-88.7791	756.746	442.511	-102.282	764.711	343.886	-66.3277	734.248	257.807
348	3.47	68.192	1200.68	608.241	137.609	1194.73	657.359	-6.19908	1180.97	645.876	203.266	1033.32	774.81	-100.082	1018.73	731.287	71.9171	971.157	648.271	320.105	690.328	717.402	338.001	740.743	438.882	255.177	753.541	447.091	275.386	756.367	353.842	241.939	736.249	267.244	-207.429	662.903	702.784	-169.723	735.82	431.442	-88.7667	756.746	442.498	-102.275	764.713	343.923	-66.3191	734.256	257.805
349	3.48	68.1637	1200.71	608.172	137.611	1194.74	657.352	-6.21105	1180.97	645.865	203.268	1033.33	774.822	-100.087	1018.73	731.279	71.9143	971.167	648.241	320.111	690.289	717.39	337.98	740.768	438.886	255.169	753.546	447.109	275.374	756.366	353.852	241.924	736.256	267.252	-207.421	662.897	702.752	-169.725	735.839	431.468	-88.7884	756.756	442.507	-102.284	764.734	343.91	-66.3504	734.284	257.77
350	3.49	68.1633	1200.73	608.109	137.615	1194.76	657.361	-6.19807	1180.97	645.846	203.256	1033.35	774.839	-100.096	1018.74	731.267	71.936	971.201	648.224	320.092	690.256	717.403	337.969	740.783	438.912	255.165	753.577	447.126	275.379	756.383	353.862	241.918	736.276	267.273	-207.393	662.823	702.644	-169.73	735.854	431.472	-88.7919	756.762	442.507	-102.314	764.749	343.897	-66.3579	734.326	257.771
351	3.5	68.2013	1200.75	608.02	137.638	1194.76	657.343	-6.17981	1180.97	645.836	203.272	1033.36	774.841	-100.078	1018.76	731.257	71.9702	971.237	648.248	320.07	690.235	717.388	337.993	740.804	438.947	255.18	753.597	447.112	275.399	756.401	353.886	241.932	736.301	267.267	-207.373	662.737	702.538	-169.738	735.852	431.464	-88.7815	756.772	442.485	-102.316	764.761	343.866	-66.3379	734.37	257.741
352	3.51	68.2174	1200.76	607.941	137.66	1194.75	657.315	-6.16029	1180.94	645.801	203.308	1033.35	774.812	-100.046	1018.75	731.251	71.9794	971.26	648.167	320.071	690.216	717.363	338.013	740.805	438.926	255.229	753.593	447.088	275.411	756.392	353.877	241.953	736.297	267.262	-207.353	662.662	702.441	-169.723	735.847	431.487	-88.7653	756.762	442.47	-102.292	764.743	343.846	-66.3193	734.378	257.749
353	3.52	68.2574	1200.71	607.948	137.685	1194.72	657.304	-6.13284	1180.92	645.802	203.343	1033.34	774.801	-99.9962	1018.73	731.247	72.0056	971.236	648.163	320.083	690.23	717.376	338.028	740.779	438.883	255.25	753.576	447.08	275.416	756.385	353.873	241.98	736.28	267.264	-207.342	662.678	702.468	-169.709	735.835	431.468	-88.743	756.751	442.486	-102.256	764.721	343.837	-66.2923	734.34	257.78
354	3.53	68.2905	1200.63	608.039	137.689	1194.68	657.286	-6.11959	1180.9	645.805	203.364	1033.33	774.822	-99.9643	1018.7	731.25	72.0394	971.171	648.28	320.085	690.244	717.394	338.045	740.742	438.905	255.238	753.555	447.101	275.413	756.375	353.872	241.972	736.263	267.276	-207.351	662.737	702.572	-169.708	735.824	431.471	-88.7569	756.747	442.519	-102.252	764.708	343.874	-66.2896	734.289	257.803
355	3.54	68.2957	1200.58	608.187	137.693	1194.66	657.295	-6.12056	1180.89	645.82	203.375	1033.32	774.861	-99.9613	1018.69	731.259	72.0357	971.127	648.357	320.085	690.235	717.387	338.046	740.719	438.961	255.191	753.545	447.125	275.389	756.361	353.869	241.953	736.233	267.318	-207.348	662.789	702.622	-169.723	735.831	431.509	-88.7757	756.747	442.534	-102.277	764.693	343.917	-66.2968	734.254	257.85
356	3.55	68.3031	1200.56	608.231	137.714	1194.66	657.308	-6.09628	1180.89	645.825	203.394	1033.31	774.875	-99.9378	1018.7	731.249	72.0348	971.097	648.429	320.096	690.228	717.4	338.041	740.705	438.989	255.181	753.532	447.142	275.381	756.356	353.875	241.948	736.221	267.326	-207.379	662.885	702.764	-169.719	735.843	431.512	-88.7631	756.727	442.562	-102.274	764.674	343.928	-66.2948	734.234	257.877
357	3.56	68.3275	1200.54	608.176	137.757	1194.62	657.288	-6.05046	1180.89	645.806	203.431	1033.29	774.842	-99.8807	1018.69	731.235	72.0958	971.112	648.439	320.117	690.22	717.413	338.062	740.677	438.959	255.208	753.531	447.109	275.405	756.365	353.869	241.977	736.21	267.305	-207.385	662.939	702.865	-169.691	735.831	431.469	-88.724	756.713	442.551	-102.229	764.684	343.894	-66.2689	734.234	257.837
358	3.57	68.3486	1200.53	608.108	137.785	1194.62	657.229	-6.01763	1180.89	645.799	203.458	1033.27	774.798	-99.8586	1018.7	731.257	72.1197	971.135	648.347	320.133	690.186	717.386	338.062	740.677	438.933	255.238	753.542	447.09	275.416	756.37	353.87	241.982	736.215	267.277	-207.362	662.919	702.822	-169.686	735.833	431.45	-88.7126	756.721	442.509	-102.223	764.699	343.858	-66.2692	734.24	257.787
359	3.58	68.3231	1200.61	608.03	137.78	1194.66	657.202	-6.03528	1180.92	645.799	203.449	1033.3	774.796	-99.8762	1018.74	731.265	72.087	971.195	648.267	320.137	690.138	717.374	338.022	740.726	438.93	255.221	753.572	447.093	275.401	756.384	353.882	241.94	736.263	267.264	-207.354	662.887	702.768	-169.706	735.848	431.482	-88.7613	756.747	442.51	-102.282	764.738	343.87	-66.303	734.293	257.783
360	3.59	68.3106	1200.72	607.909	137.79	1194.69	657.192	-6.04322	1180.96	645.82	203.451	1033.32	774.782	-99.8948	1018.78	731.267	72.066	971.244	648.227	320.152	690.105	717.35	337.992	740.774	438.91	255.192	753.598	447.072	275.396	756.405	353.903	241.916	736.317	267.277	-207.317	662.812	702.663	-169.714	735.869	431.491	-88.7994	756.767	442.531	-102.326	764.766	343.922	-66.3325	734.339	257.775
361	3.6	68.3267	1200.76	607.871	137.807	1194.69	657.178	-6.01886	1180.98	645.825	203.475	1033.31	774.753	-99.8808	1018.79	731.24	72.0816	971.265	648.209	320.162	690.072	717.33	337.99	740.795	438.879	255.201	753.601	447.083	275.405	756.411	353.906	241.919	736.341	267.279	-207.265	662.742	702.557	-169.715	735.852	431.5	-88.7917	756.758	442.529	-102.317	764.778	343.917	-66.3465	734.374	257.726
362	3.61	68.3719	1200.75	607.902	137.832	1194.67	657.203	-5.9876	1180.97	645.829	203.489	1033.28	774.745	-99.8518	1018.77	731.224	72.103	971.244	648.22	320.152	690.042	717.323	337.988	740.776	438.886	255.205	753.579	447.105	275.394	756.396	353.87	241.923	736.308	267.271	-207.242	662.722	702.512	-169.72	735.829	431.505	-88.7859	756.726	442.53	-102.309	764.754	343.891	-66.3566	734.363	257.734
363	3.62	68.4292	1200.66	607.999	137.862	1194.63	657.208	-5.94785	1180.95	645.838	203.514	1033.24	774.734	-99.813	1018.75	731.216	72.1208	971.175	648.303	320.144	690.055	717.348	338.006	740.716	438.911	255.201	753.548	447.116	275.387	756.378	353.87	241.935	736.26	267.28	-207.269	662.839	702.676	-169.717	735.807	431.487	-88.7698	756.707	442.525	-102.301	764.71	343.889	-66.3464	734.309	257.761
364	3.63	68.4619	1200.59	608.061	137.895	1194.6	657.211	-5.89771	1180.93	645.858	203.567	1033.21	774.732	-99.7794	1018.72	731.207	72.1458	971.099	648.392	320.16	690.073	717.355	338.036	740.669	438.917	255.204	753.521	447.106	275.383	756.354	353.851	241.942	736.23	267.263	-207.301	662.941	702.828	-169.705	735.799	431.445	-88.7545	756.677	442.532	-102.267	764.67	343.882	-66.3248	734.249	257.78
365	3.64	68.4744	1200.57	608.139	137.93	1194.59	657.274	-5.86918	1180.93	645.908	203.6	1033.2	774.734	-99.7596	1018.73	731.239	72.1423	971.087	648.372	320.16	690.078	717.372	338.047	740.636	438.946	255.19	753.514	447.093	275.368	756.348	353.827	241.941	736.209	267.289	-207.309	662.982	702.852	-169.727	735.825	431.446	-88.7418	756.665	442.558	-102.263	764.642	343.939	-66.3321	734.224	257.808
366	3.65	68.4941	1200.57	608.209	137.977	1194.58	657.332	-5.83285	1180.94	645.955	203.618	1033.21	774.769	-99.7399	1018.75	731.27	72.1469	971.102	648.378	320.156	690.078	717.415	338.052	740.625	438.997	255.167	753.535	447.098	275.366	756.35	353.86	241.942	736.216	267.319	-207.327	663.063	702.955	-169.725	735.852	431.495	-88.7403	756.685	442.569	-102.268	764.636	343.978	-66.3398	734.226	257.83
367	3.66	68.5689	1200.62	608.162	138.036	1194.6	657.31	-5.75973	1180.97	645.94	203.669	1033.22	774.745	-99.7015	1018.78	731.287	72.2044	971.143	648.315	320.175	690.054	717.423	338.082	740.638	438.985	255.202	753.565	447.079	275.404	756.373	353.875	241.974	736.241	267.318	-207.331	663.094	702.992	-169.69	735.886	431.501	-88.6971	756.72	442.54	-102.239	764.655	343.942	-66.2958	734.256	257.807
368	3.67	68.6415	1200.67	607.993	138.089	1194.63	657.235	-5.71398	1181.01	645.84	203.71	1033.21	774.671	-99.6577	1018.82	731.245	72.256	971.23	648.151	320.195	689.996	717.382	338.115	740.673	438.936	255.271	753.587	447.063	275.444	756.397	353.875	241.997	736.27	267.262	-207.282	663.023	702.847	-169.643	735.888	431.449	-88.6751	756.747	442.472	-102.197	764.698	343.887	-66.2478	734.309	257.754
369	3.68	68.6707	1200.73	607.895	138.101	1194.66	657.181	-5.7079	1181.05	645.799	203.71	1033.23	774.652	-99.6604	1018.86	731.232	72.2547	971.279	648.117	320.194	689.923	717.323	338.08	740.73	438.899	255.294	753.598	447.065	275.441	756.42	353.906	241.988	736.317	267.252	-207.268	662.956	702.759	-169.638	735.882	431.446	-88.7037	756.761	442.463	-102.22	764.748	343.847	-66.2664	734.369	257.718
370	3.69	68.6657	1200.8	607.868	138.092	1194.69	657.162	-5.71775	1181.08	645.825	203.695	1033.25	774.676	-99.6947	1018.92	731.253	72.2188	971.307	648.132	320.196	689.892	717.333	338.016	740.766	438.919	255.266	753.597	447.123	275.419	756.444	353.941	241.961	736.353	267.297	-207.271	662.939	702.741	-169.661	735.873	431.504	-88.7362	756.757	442.529	-102.281	764.778	343.886	-66.3266	734.415	257.721
371	3.7	68.6622	1200.82	607.842	138.1	1194.68	657.147	-5.71728	1181.09	645.872	203.684	1033.26	774.675	-99.7215	1018.94	731.267	72.1926	971.302	648.14	320.188	689.875	717.339	337.993	740.771	438.937	255.231	753.585	447.135	275.408	756.44	353.94	241.93	736.364	267.319	-207.235	662.892	702.669	-169.688	735.863	431.567	-88.7676	756.761	442.547	-102.31	764.761	343.933	-66.367	734.442	257.73
372	3.71	68.687	1200.75	607.91	138.136	1194.62	657.153	-5.70018	1181.07	645.874	203.692	1033.22	774.663	-99.7163	1018.9	731.281	72.1785	971.243	648.202	320.191	689.866	717.33	337.992	740.742	438.928	255.22	753.541	447.147	275.411	756.408	353.926	241.917	736.321	267.319	-207.225	662.857	702.615	-169.717	735.837	431.569	-88.782	756.74	442.561	-102.314	764.741	343.933	-66.3726	734.401	257.742
373	3.72	68.7431	1200.66	608.056	138.179	1194.54	657.189	-5.65604	1181.03	645.883	203.715	1033.16	774.635	-99.694	1018.83	731.27	72.1897	971.129	648.336	320.18	689.879	717.321	338.024	740.655	438.959	255.227	753.493	447.168	275.406	756.372	353.904	241.923	736.262	267.304	-207.263	662.913	702.664	-169.732	735.818	431.539	-88.768	756.685	442.557	-102.305	764.694	343.936	-66.3391	734.294	257.803
374	3.73	68.8001	1200.59	608.127	138.232	1194.48	657.252	-5.57849	1181	645.887	203.738	1033.12	774.641	-99.6572	1018.79	731.271	72.216	971.088	648.327	320.157	689.901	717.359	338.074	740.577	438.988	255.227	753.478	447.152	275.404	756.345	353.875	241.952	736.217	267.308	-207.294	663.009	702.742	-169.713	735.814	431.49	-88.7464	756.64	442.579	-102.267	764.654	343.906	-66.2956	734.216	257.859
375	3.74	68.8291	1200.57	608.079	138.284	1194.47	657.306	-5.52581	1180.98	645.885	203.765	1033.11	774.65	-99.6209	1018.78	731.276	72.2352	971.099	648.306	320.168	689.932	717.391	338.099	740.552	438.993	255.226	753.5	447.11	275.388	756.332	353.834	241.974	736.201	267.312	-207.311	663.089	702.806	-169.692	735.847	431.478	-88.7238	756.642	442.545	-102.241	764.636	343.871	-66.28	734.182	257.844
376	3.75	68.8357	1200.59	608.081	138.314	1194.48	657.352	-5.50545	1181.01	645.909	203.784	1033.11	774.669	-99.616	1018.79	731.273	72.2377	971.136	648.268	320.169	689.924	717.366	338.116	740.547	439.03	255.217	753.531	447.098	275.388	756.332	353.861	241.985	736.2	267.316	-207.325	663.113	702.834	-169.697	735.88	431.49	-88.7224	756.674	442.556	-102.24	764.623	343.909	-66.2755	734.183	257.846
377	3.76	68.8491	1200.64	608.089	138.336	1194.51	657.365	-5.50055	1181.04	645.891	203.787	1033.14	774.68	-99.6156	1018.81	731.266	72.2545	971.177	648.276	320.175	689.899	717.337	338.125	740.575	439.056	255.237	753.547	447.102	275.413	756.347	353.892	241.993	736.22	267.334	-207.355	663.148	702.903	-169.694	735.9	431.5	-88.7167	756.718	442.535	-102.241	764.651	343.933	-66.2804	734.222	257.849
378	3.77	68.8618	1200.7	607.995	138.326	1194.56	657.289	-5.51455	1181.09	645.811	203.787	1033.17	774.683	-99.6291	1018.86	731.275	72.2801	971.228	648.232	320.208	689.897	717.361	338.083	740.643	438.973	255.26	753.569	447.074	275.426	756.394	353.893	241.98	736.278	267.296	-207.344	663.116	702.888	-169.671	735.899	431.475	-88.7188	756.757	442.502	-102.238	764.703	343.916	-66.2947	734.297	257.793
379	3.78	68.8255	1200.78	607.848	138.268	1194.61	657.175	-5.54746	1181.12	645.753	203.752	1033.2	774.682	-99.6675	1018.91	731.245	72.2428	971.282	648.143	320.237	689.901	717.389	338.012	740.723	438.873	255.257	753.587	447.063	275.401	756.431	353.863	241.948	736.341	267.26	-207.297	663.045	702.789	-169.664	735.875	431.469	-88.7458	756.78	442.442	-102.272	764.75	343.894	-66.3602	734.389	257.683
380	3.79	68.7744	1200.84	607.824	138.214	1194.65	657.151	-5.59422	1181.13	645.795	203.713	1033.22	774.689	-99.7054	1018.93	731.252	72.1995	971.301	648.137	320.216	689.861	717.354	337.982	740.771	438.883	255.216	753.583	447.075	275.382	756.447	353.862	241.901	736.379	267.253	-207.249	662.919	702.595	-169.686	735.847	431.517	-88.7848	756.77	442.466	-102.308	764.771	343.921	-66.4154	734.437	257.658
381	3.8	68.7675	1200.82	607.908	138.208	1194.64	657.218	-5.63005	1181.12	645.87	203.699	1033.22	774.748	-99.7157	1018.93	731.299	72.1877	971.261	648.236	320.194	689.851	717.34	337.974	740.772	438.919	255.185	753.565	447.105	275.379	756.441	353.891	241.896	736.37	267.296	-207.235	662.864	702.54	-169.711	735.842	431.549	-88.8025	756.757	442.514	-102.325	764.748	343.957	-66.4093	734.421	257.706
382	3.81	68.8064	1200.76	608.041	138.24	1194.63	657.313	-5.61308	1181.1	645.919	203.717	1033.21	774.783	-99.6866	1018.88	731.338	72.2192	971.237	648.281	320.184	689.88	717.354	337.999	740.735	438.931	255.196	753.558	447.122	275.386	756.423	353.889	241.924	736.331	267.312	-207.226	662.899	702.611	-169.703	735.845	431.572	-88.7697	756.737	442.554	-102.303	764.724	343.949	-66.3654	734.379	257.754
383	3.82	68.8676	1200.67	608.196	138.303	1194.57	657.429	-5.53333	1181.04	645.967	203.771	1033.14	774.781	-99.6281	1018.82	731.36	72.2747	971.191	648.363	320.164	689.926	717.396	338.073	740.651	438.961	255.235	753.551	447.121	275.418	756.394	353.873	241.983	736.274	267.308	-207.198	662.903	702.6	-169.678	735.861	431.548	-88.7028	756.687	442.586	-102.233	764.675	343.956	-66.2858	734.3	257.819
384	3.83	68.9202	1200.6	608.318	138.363	1194.53	657.536	-5.44887	1180.98	646.015	203.829	1033.1	774.783	-99.5951	1018.79	731.365	72.3305	971.138	648.441	320.159	689.952	717.402	338.146	740.581	438.994	255.277	753.536	447.133	275.441	756.359	353.852	242.067	736.234	267.349	-207.176	662.913	702.602	-169.652	735.876	431.506	-88.62	756.612	442.604	-102.168	764.604	343.954	-66.2212	734.231	257.855
385	3.84	68.9147	1200.62	608.354	138.375	1194.54	657.585	-5.42578	1180.98	646.05	203.842	1033.1	774.801	-99.5899	1018.79	731.372	72.3306	971.17	648.359	320.166	689.956	717.403	338.171	740.576	438.999	255.303	753.538	447.143	275.45	756.358	353.838	242.078	736.24	267.329	-207.199	662.974	702.717	-169.634	735.887	431.475	-88.601	756.607	442.583	-102.133	764.594	343.926	-66.2054	734.221	257.837
386	3.85	68.8599	1200.68	608.324	138.31	1194.6	657.565	-5.4796	1181.04	646.067	203.816	1033.13	774.804	-99.612	1018.81	731.394	72.2976	971.237	648.337	320.189	689.948	717.421	338.127	740.619	438.994	255.262	753.56	447.102	275.432	756.393	353.857	242.018	736.269	267.282	-207.229	663.056	702.881	-169.644	735.898	431.499	-88.6446	756.669	442.523	-102.182	764.652	343.909	-66.2456	734.272	257.798
387	3.86	68.7886	1200.77	608.255	138.221	1194.67	657.513	-5.56582	1181.12	646.071	203.77	1033.19	774.831	-99.6621	1018.85	731.4	72.2498	971.272	648.322	320.21	689.933	717.438	338.053	740.683	438.989	255.226	753.569	447.11	275.41	756.42	353.887	241.953	736.308	267.271	-207.219	663.036	702.863	-169.667	735.886	431.534	-88.7152	756.735	442.505	-102.244	764.707	343.944	-66.3187	734.351	257.759
388	3.87	68.7338	1200.87	608.205	138.148	1194.73	657.452	-5.64783	1181.16	646.101	203.724	1033.22	774.837	-99.698	1018.89	731.426	72.1949	971.309	648.272	320.221	689.876	717.38	338.007	740.739	438.945	255.201	753.568	447.115	275.397	756.422	353.902	241.916	736.339	267.278	-207.176	662.949	702.743	-169.702	735.86	431.542	-88.7577	756.744	442.536	-102.295	764.736	343.962	-66.377	734.413	257.709
389	3.88	68.6755	1200.96	608.155	138.117	1194.76	657.44	-5.69316	1181.2	646.14	203.717	1033.22	774.82	-99.7231	1018.91	731.42	72.1562	971.332	648.27	320.254	689.832	717.342	337.992	740.769	438.918	255.182	753.574	447.104	275.395	756.421	353.884	241.898	736.363	267.281	-207.138	662.894	702.681	-169.709	735.844	431.543	-88.7723	756.743	442.525	-102.314	764.751	343.921	-66.4034	734.441	257.675
390	3.89	68.6486	1200.97	608.216	138.11	1194.77	657.471	-5.69261	1181.21	646.179	203.727	1033.21	774.84	-99.7228	1018.89	731.426	72.1509	971.35	648.277	320.265	689.855	717.362	337.998	740.761	438.914	255.194	753.567	447.122	275.41	756.429	353.908	241.902	736.371	267.268	-207.083	662.846	702.613	-169.695	735.841	431.554	-88.7659	756.736	442.544	-102.316	764.748	343.934	-66.4059	734.439	257.674
391	3.9	68.6567	1200.94	608.32	138.126	1194.77	657.576	-5.67694	1181.2	646.209	203.731	1033.2	774.835	-99.695	1018.87	731.491	72.1795	971.341	648.37	320.235	689.88	717.371	338.027	740.729	438.962	255.214	753.564	447.129	275.416	756.438	353.939	241.924	736.352	267.261	-207.086	662.844	702.606	-169.683	735.854	431.562	-88.7465	756.734	442.568	-102.299	764.733	343.954	-66.3581	734.396	257.743
392	3.91	68.6846	1200.91	608.427	138.155	1194.74	657.711	-5.64397	1181.18	646.255	203.751	1033.18	774.824	-99.6795	1018.82	731.531	72.2259	971.329	648.455	320.194	689.9	717.379	338.071	740.676	438.968	255.24	753.557	447.122	275.416	756.428	353.915	241.963	736.311	267.274	-207.098	662.837	702.598	-169.671	735.875	431.552	-88.7204	756.721	442.548	-102.255	764.701	343.952	-66.2854	734.327	257.837
393	3.92	68.7169	1200.86	608.542	138.167	1194.7	657.762	-5.58602	1181.13	646.286	203.784	1033.14	774.819	-99.664	1018.77	731.542	72.2343	971.303	648.45	320.179	689.926	717.375	338.11	740.614	438.993	255.246	753.537	447.107	275.415	756.392	353.872	241.996	736.259	267.286	-207.142	662.918	702.742	-169.656	735.879	431.519	-88.6736	756.669	442.561	-102.209	764.645	343.921	-66.2516	734.269	257.856
394	3.93	68.697	1200.8	608.674	138.16	1194.68	657.814	-5.56288	1181.08	646.371	203.79	1033.12	774.837	-99.6596	1018.76	731.547	72.2191	971.269	648.506	320.19	689.973	717.4	338.113	740.58	438.998	255.252	753.517	447.134	275.404	756.349	353.858	242.017	736.221	267.32	-207.177	663.012	702.887	-169.657	735.875	431.493	-88.6464	756.64	442.575	-102.188	764.612	343.907	-66.2545	734.223	257.872
395	3.94	68.6482	1200.79	608.692	138.111	1194.67	657.789	-5.60228	1181.07	646.415	203.766	1033.11	774.811	-99.6739	1018.77	731.538	72.1903	971.265	648.515	320.206	689.988	717.398	338.092	740.58	438.977	255.22	753.505	447.132	275.403	756.355	353.859	242.002	736.213	267.321	-207.2	663.056	702.921	-169.682	735.866	431.488	-88.6822	756.642	442.581	-102.205	764.605	343.924	-66.2791	734.21	257.871
396	3.95	68.5996	1200.83	608.655	138.059	1194.69	657.725	-5.6536	1181.1	646.409	203.738	1033.13	774.802	-99.7021	1018.78	731.516	72.1533	971.287	648.563	320.237	689.967	717.382	338.052	740.631	438.968	255.184	753.499	447.123	275.4	756.369	353.873	241.957	736.232	267.3	-207.183	663.038	702.873	-169.704	735.843	431.497	-88.7492	756.676	442.572	-102.263	764.639	343.972	-66.3255	734.236	257.852
397	3.96	68.5447	1200.94	608.575	138.032	1194.75	657.731	-5.71042	1181.16	646.409	203.713	1033.18	774.804	-99.7272	1018.84	731.529	72.1266	971.352	648.515	320.273	689.93	717.359	338.023	740.692	438.965	255.179	753.508	447.151	275.412	756.389	353.927	241.938	736.279	267.312	-207.165	663.001	702.859	-169.713	735.841	431.56	-88.7883	756.728	442.548	-102.289	764.703	343.985	-66.3645	734.318	257.806
398	3.97	68.5056	1201.1	608.393	138.023	1194.83	657.718	-5.73237	1181.22	646.407	203.7	1033.23	774.829	-99.7395	1018.9	731.543	72.1169	971.483	648.378	320.29	689.894	717.371	338.015	740.752	438.959	255.195	753.556	447.141	275.436	756.423	353.976	241.937	736.347	267.302	-207.138	662.936	702.81	-169.689	735.86	431.595	-88.7783	756.771	442.556	-102.297	764.756	343.963	-66.3714	734.429	257.743
399	3.98	68.5224	1201.18	608.266	138.03	1194.87	657.706	-5.72829	1181.25	646.403	203.705	1033.26	774.821	-99.7264	1018.93	731.552	72.1454	971.591	648.223	320.277	689.863	717.354	338.02	740.787	438.935	255.237	753.597	447.113	275.444	756.462	353.964	241.968	736.398	267.292	-207.106	662.859	702.674	-169.653	735.88	431.571	-88.7388	756.797	442.502	-102.283	764.787	343.91	-66.3624	734.504	257.669
400	3.99	68.5701	1201.16	608.277	138.037	1194.87	657.687	-5.71643	1181.24	646.399	203.719	1033.26	774.773	-99.7166	1018.93	731.567	72.1728	971.598	648.178	320.254	689.872	717.346	338.044	740.79	438.907	255.272	753.592	447.107	275.453	756.492	353.941	241.998	736.421	267.244	-207.125	662.843	702.675	-169.633	735.881	431.539	-88.7153	756.795	442.484	-102.256	764.786	343.904	-66.3389	734.503	257.637
401	4	68.5898	1201.06	608.423	138.037	1194.84	657.715	-5.72254	1181.22	646.432	203.707	1033.24	774.752	-99.7225	1018.9	731.566	72.1583	971.525	648.312	320.214	689.926	717.372	338.054	740.746	438.907	255.261	753.566	447.118	275.447	756.486	353.922	241.99	736.383	267.207	-207.124	662.857	702.689	-169.641	735.879	431.528	-88.7224	756.765	442.513	-102.243	764.747	343.905	-66.3095	734.429	257.704
402	4.01	68.574	1200.94	608.59	138.03	1194.79	657.804	-5.73726	1181.17	646.493	203.7	1033.18	774.725	-99.7451	1018.85	731.58	72.1188	971.412	648.485	320.177	689.966	717.41	338.035	740.673	438.932	255.204	753.526	447.135	275.405	756.441	353.879	241.955	736.32	267.204	-207.118	662.873	702.712	-169.672	735.858	431.535	-88.7301	756.717	442.522	-102.258	764.681	343.925	-66.3059	734.335	257.759
403	4.02	68.5596	1200.83	608.744	138.052	1194.72	657.907	-5.72706	1181.12	646.562	203.688	1033.13	774.696	-99.7617	1018.78	731.564	72.0966	971.306	648.573	320.151	689.967	717.424	338.042	740.589	438.961	255.182	753.472	447.152	275.382	756.377	353.854	241.96	736.243	267.267	-207.147	662.914	702.785	-169.707	735.828	431.526	-88.7298	756.641	442.558	-102.262	764.613	343.942	-66.3061	734.238	257.823
404	4.03	68.5507	1200.77	608.86	138.074	1194.66	657.971	-5.71185	1181.09	646.586	203.701	1033.09	774.702	-99.7604	1018.73	731.528	72.0757	971.262	648.637	320.16	689.939	717.412	338.075	740.534	439.007	255.19	753.433	447.155	275.378	756.331	353.851	241.985	736.18	267.329	-207.134	662.912	702.758	-169.715	735.811	431.531	-88.7133	756.591	442.602	-102.247	764.57	343.959	-66.3033	734.188	257.861
405	4.04	68.5393	1200.79	608.851	138.086	1194.67	657.949	-5.71705	1181.12	646.541	203.706	1033.11	774.677	-99.7506	1018.75	731.503	72.0464	971.291	648.631	320.203	689.927	717.399	338.093	740.546	439.038	255.195	753.448	447.137	275.392	756.333	353.872	241.988	736.185	267.311	-207.116	662.94	702.757	-169.711	735.822	431.52	-88.7188	756.622	442.585	-102.244	764.595	343.951	-66.3044	734.189	257.849
406	4.05	68.5367	1200.89	608.702	138.067	1194.75	657.862	-5.75095	1181.2	646.478	203.695	1033.18	774.624	-99.7352	1018.81	731.462	72.0264	971.405	648.471	320.254	689.907	717.384	338.083	740.601	439.018	255.197	753.489	447.114	275.423	756.378	353.909	241.979	736.237	267.283	-207.107	662.958	702.753	-169.7	735.851	431.495	-88.7371	756.701	442.538	-102.262	764.667	343.913	-66.3189	734.259	257.789
407	4.06	68.5177	1201.04	608.501	138.041	1194.83	657.768	-5.76325	1181.27	646.416	203.682	1033.25	774.595	-99.7441	1018.87	731.436	72.0099	971.539	648.239	320.267	689.889	717.362	338.058	740.683	438.976	255.213	753.542	447.117	275.435	756.429	353.945	241.971	736.31	267.281	-207.108	662.91	702.725	-169.678	735.887	431.51	-88.7431	756.771	442.486	-102.275	764.73	343.916	-66.3433	734.376	257.733
408	4.07	68.4709	1201.21	608.261	138.01	1194.89	657.707	-5.77696	1181.31	646.384	203.659	1033.31	774.589	-99.7799	1018.95	731.428	71.9838	971.675	648.02	320.252	689.884	717.359	338.019	740.772	438.952	255.203	753.596	447.083	275.412	756.465	353.918	241.948	736.384	267.281	-207.093	662.876	702.669	-169.671	735.911	431.545	-88.7456	756.824	442.451	-102.295	764.786	343.933	-66.3656	734.466	257.692
409	4.08	68.452	1201.25	608.164	137.991	1194.93	657.668	-5.78954	1181.31	646.344	203.636	1033.33	774.574	-99.8117	1018.98	731.433	71.9741	971.746	647.95	320.227	689.897	717.375	337.996	740.81	438.933	255.207	753.629	447.067	275.391	756.472	353.896	241.927	736.412	267.274	-207.057	662.849	702.618	-169.662	735.913	431.56	-88.7537	756.836	442.469	-102.3	764.8	343.932	-66.3825	734.498	257.658
410	4.09	68.5051	1201.12	608.284	137.979	1194.9	657.655	-5.78495	1181.27	646.314	203.624	1033.3	774.539	-99.8101	1018.94	731.407	72.0028	971.68	648.015	320.175	689.926	717.392	338.005	740.761	438.905	255.224	753.594	447.076	275.383	756.459	353.879	241.936	736.378	267.252	-207.065	662.854	702.652	-169.663	735.882	431.536	-88.7397	756.803	442.479	-102.287	764.772	343.911	-66.3532	734.438	257.667
411	4.1	68.569	1200.94	608.422	137.984	1194.83	657.64	-5.75468	1181.21	646.303	203.646	1033.24	774.492	-99.7904	1018.87	731.378	72.0337	971.522	648.219	320.143	689.964	717.397	338.044	740.683	438.915	255.233	753.527	447.089	275.384	756.42	353.857	241.943	736.308	267.218	-207.061	662.842	702.632	-169.675	735.832	431.503	-88.7179	756.728	442.523	-102.266	764.697	343.901	-66.3006	734.326	257.722
412	4.11	68.58	1200.83	608.549	138.009	1194.75	657.707	-5.73942	1181.15	646.348	203.655	1033.19	774.46	-99.7731	1018.81	731.363	72.0446	971.38	648.409	320.147	689.987	717.378	338.069	740.611	438.936	255.218	753.485	447.102	275.378	756.377	353.822	241.945	736.257	267.215	-207.04	662.852	702.654	-169.696	735.824	431.519	-88.7142	756.649	442.612	-102.243	764.646	343.903	-66.2882	734.236	257.801
413	4.12	68.5818	1200.76	608.624	138.036	1194.72	657.73	-5.73863	1181.11	646.355	203.663	1033.17	774.434	-99.7602	1018.78	731.372	72.0366	971.32	648.478	320.164	689.981	717.372	338.079	740.574	438.975	255.198	753.469	447.11	275.368	756.346	353.804	241.948	736.228	267.265	-207.071	662.892	702.736	-169.708	735.831	431.543	-88.7103	756.609	442.62	-102.253	764.621	343.921	-66.2905	734.184	257.852
414	4.13	68.5992	1200.75	608.622	138.065	1194.69	657.711	-5.73172	1181.11	646.308	203.681	1033.16	774.424	-99.7396	1018.78	731.358	72.0262	971.331	648.471	320.184	689.928	717.36	338.086	740.57	438.981	255.193	753.47	447.105	275.371	756.339	353.834	241.947	736.207	267.289	-207.104	662.92	702.803	-169.702	735.829	431.553	-88.7001	756.624	442.557	-102.263	764.604	343.925	-66.2909	734.198	257.836
415	4.14	68.6196	1200.79	608.465	138.1	1194.7	657.687	-5.71097	1181.14	646.237	203.704	1033.18	774.408	-99.7131	1018.82	731.347	72.0384	971.389	648.373	320.236	689.889	717.385	338.099	740.59	439.009	255.227	753.494	447.122	275.399	756.358	353.883	241.963	736.212	267.324	-207.118	662.938	702.869	-169.68	735.84	431.575	-88.6931	756.687	442.543	-102.251	764.621	343.961	-66.2957	734.25	257.806
416	4.15	68.6504	1200.87	608.274	138.129	1194.73	657.595	-5.71189	1181.19	646.183	203.713	1033.23	774.371	-99.6972	1018.86	731.316	72.0225	971.501	648.124	320.284	689.854	717.378	338.083	740.653	438.959	255.255	753.535	447.121	275.431	756.392	353.914	241.984	736.267	267.327	-207.091	662.929	702.832	-169.658	735.86	431.578	-88.6945	756.74	442.523	-102.243	764.694	343.966	-66.3038	734.346	257.721
417	4.16	68.6564	1200.97	608.08	138.13	1194.78	657.484	-5.7149	1181.22	646.088	203.694	1033.27	774.301	-99.7087	1018.91	731.246	72.0003	971.618	647.894	320.289	689.824	717.346	338.054	740.727	438.905	255.263	753.566	447.108	275.442	756.438	353.909	241.973	736.353	267.273	-207.024	662.837	702.641	-169.638	735.88	431.537	-88.6995	756.78	442.46	-102.255	764.761	343.894	-66.3346	734.416	257.656
418	4.17	68.6573	1201.01	607.951	138.109	1194.79	657.392	-5.70718	1181.22	646.008	203.669	1033.27	774.243	-99.7357	1018.94	731.218	71.9664	971.676	647.788	320.262	689.793	717.298	338.036	740.763	438.902	255.245	753.576	447.08	275.418	756.459	353.891	241.934	736.384	267.259	-206.996	662.778	702.567	-169.649	735.885	431.52	-88.7284	756.789	442.454	-102.28	764.779	343.87	-66.3703	734.456	257.63
419	4.18	68.6611	1200.93	608.01	138.079	1194.76	657.334	-5.70841	1181.19	646.001	203.654	1033.25	774.225	-99.7513	1018.94	731.24	71.9455	971.604	647.848	320.219	689.783	717.33	338.006	740.751	438.919	255.23	753.548	447.108	275.392	756.448	353.918	241.899	736.362	267.273	-207.003	662.766	702.596	-169.69	735.871	431.56	-88.7543	756.766	442.522	-102.294	764.749	343.949	-66.3825	734.431	257.683
420	4.19	68.6949	1200.8	608.11	138.098	1194.67	657.343	-5.70195	1181.13	645.992	203.652	1033.19	774.199	-99.7636	1018.88	731.204	71.9333	971.476	647.946	320.173	689.786	717.372	337.988	740.694	438.897	255.211	753.504	447.121	275.375	756.417	353.887	241.876	736.314	267.252	-207.021	662.798	702.672	-169.707	735.846	431.581	-88.7644	756.728	442.556	-102.321	764.69	343.99	-66.3645	734.354	257.753
421	4.2	68.7351	1200.68	608.103	138.145	1194.58	657.359	-5.66456	1181.05	645.947	203.682	1033.14	774.128	-99.7519	1018.83	731.164	71.9457	971.376	648.01	320.129	689.781	717.366	338.009	740.617	438.917	255.201	753.472	447.101	275.36	756.381	353.823	241.887	736.259	267.237	-207.005	662.797	702.62	-169.716	735.83	431.548	-88.7473	756.687	442.558	-102.308	764.635	343.967	-66.3313	734.27	257.805
422	4.21	68.7865	1200.6	608.106	138.212	1194.51	657.348	-5.59228	1181.01	645.903	203.712	1033.1	774.079	-99.7024	1018.81	731.139	71.9717	971.305	648.09	320.107	689.779	717.366	338.067	740.567	438.962	255.209	753.457	447.091	275.379	756.356	353.82	241.927	736.224	267.259	-206.993	662.8	702.575	-169.702	735.825	431.528	-88.713	756.646	442.578	-102.268	764.597	343.954	-66.3003	734.2	257.846
423	4.22	68.8198	1200.58	608.066	138.286	1194.48	657.331	-5.5364	1181	645.856	203.755	1033.08	774.037	-99.6641	1018.82	731.13	71.983	971.28	648.097	320.125	689.757	717.384	338.094	740.541	438.985	255.209	753.46	447.102	275.398	756.344	353.835	241.956	736.218	267.266	-207.017	662.884	702.691	-169.682	735.849	431.505	-88.6913	756.618	442.601	-102.235	764.595	343.955	-66.2814	734.178	257.857
424	4.23	68.8466	1200.59	607.941	138.342	1194.46	657.265	-5.51208	1181.03	645.787	203.784	1033.09	774.017	-99.6335	1018.86	731.108	71.9775	971.326	647.972	320.154	689.72	717.375	338.102	740.54	439.001	255.206	753.47	447.104	275.401	756.354	353.849	241.962	736.213	267.253	-207.026	662.92	702.674	-169.667	735.875	431.507	-88.6951	756.663	442.558	-102.221	764.618	343.928	-66.2866	734.196	257.818
425	4.24	68.876	1200.61	607.828	138.359	1194.47	657.144	-5.49994	1181.07	645.662	203.779	1033.12	773.999	-99.609	1018.91	731.06	71.9772	971.404	647.842	320.16	689.682	717.367	338.085	740.583	438.984	255.219	753.498	447.113	275.412	756.373	353.884	241.961	736.232	267.282	-207.058	662.924	702.7	-169.667	735.884	431.532	-88.7174	756.729	442.482	-102.251	764.665	343.907	-66.3003	734.26	257.812
426	4.25	68.897	1200.66	607.729	138.355	1194.49	657.042	-5.49194	1181.1	645.598	203.761	1033.17	773.979	-99.6103	1018.97	731.01	71.9622	971.484	647.755	320.175	689.643	717.352	338.052	740.656	438.991	255.226	753.532	447.123	275.415	756.407	353.914	241.949	736.285	267.311	-207.084	662.936	702.716	-169.659	735.888	431.55	-88.731	756.775	442.474	-102.293	764.71	343.93	-66.3379	734.354	257.751
427	4.26	68.9278	1200.67	607.64	138.373	1194.51	656.941	-5.47526	1181.12	645.547	203.751	1033.2	773.932	-99.6053	1019.02	730.96	71.9561	971.559	647.614	320.197	689.612	717.334	338.016	740.697	438.972	255.222	753.542	447.109	275.422	756.432	353.918	241.932	736.342	267.301	-207.071	662.94	702.692	-169.651	735.884	431.536	-88.7466	756.784	442.489	-102.313	764.74	343.973	-66.3622	734.427	257.693
428	4.27	68.9542	1200.66	607.593	138.408	1194.51	656.861	-5.45381	1181.09	645.457	203.756	1033.2	773.872	-99.6043	1019.04	730.901	71.9775	971.572	647.55	320.185	689.607	717.333	338.001	740.716	438.904	255.225	753.534	447.101	275.415	756.443	353.882	241.917	736.36	267.252	-207.056	662.912	702.638	-169.654	735.866	431.523	-88.7546	756.769	442.463	-102.313	764.746	343.949	-66.3595	734.427	257.671
429	4.28	68.9771	1200.59	607.6	138.446	1194.47	656.826	-5.43692	1181.07	645.416	203.773	1033.17	773.836	-99.6038	1019.04	730.864	71.9758	971.526	647.605	320.14	689.599	717.31	338.01	740.689	438.901	255.23	753.525	447.129	275.395	756.445	353.867	241.905	736.348	267.237	-207.065	662.881	702.587	-169.671	735.863	431.527	-88.7603	756.75	442.466	-102.315	764.736	343.922	-66.3472	734.386	257.71
430	4.29	69.0054	1200.52	607.613	138.489	1194.39	656.823	-5.38386	1181.02	645.393	203.785	1033.12	773.811	-99.5807	1019.02	730.858	71.9879	971.437	647.743	320.09	689.617	717.336	338.025	740.635	438.953	255.213	753.495	447.125	275.374	756.423	353.85	241.897	736.303	267.244	-207.07	662.903	702.557	-169.686	735.854	431.56	-88.7673	756.726	442.55	-102.299	764.694	343.945	-66.3188	734.314	257.788
431	4.3	69.0589	1200.44	607.639	138.549	1194.31	656.806	-5.3041	1180.95	645.409	203.815	1033.06	773.771	-99.5437	1018.99	730.835	72.0435	971.363	647.788	320.069	689.623	717.347	338.06	740.569	438.97	255.213	753.476	447.098	275.362	756.39	353.805	241.937	736.258	267.257	-207.103	662.941	702.605	-169.692	735.846	431.545	-88.7409	756.671	442.587	-102.248	764.632	343.948	-66.2916	734.229	257.837
432	4.31	69.1141	1200.39	607.623	138.603	1194.26	656.787	-5.23623	1180.89	645.374	203.856	1033.04	773.739	-99.4999	1018.97	730.801	72.0876	971.307	647.842	320.079	689.608	717.325	338.095	740.526	438.978	255.235	753.462	447.102	275.373	756.367	353.789	241.968	736.231	267.28	-207.154	662.988	702.669	-169.686	735.842	431.534	-88.6934	756.632	442.574	-102.218	764.606	343.891	-66.279	734.204	257.84
433	4.32	69.1453	1200.39	607.535	138.644	1194.25	656.736	-5.21124	1180.9	645.309	203.874	1033.05	773.725	-99.4796	1018.98	730.75	72.0797	971.323	647.78	320.118	689.605	717.351	338.111	740.522	438.997	255.223	753.473	447.097	275.39	756.379	353.83	241.964	736.222	267.269	-207.188	663.059	702.721	-169.679	735.848	431.529	-88.6988	756.659	442.558	-102.218	764.629	343.853	-66.2761	734.214	257.835
434	4.33	69.1448	1200.44	607.368	138.667	1194.27	656.659	-5.21368	1180.97	645.242	203.876	1033.09	773.692	-99.4591	1019.04	730.717	72.0556	971.414	647.586	320.166	689.585	717.352	338.1	740.559	439.004	255.221	753.487	447.108	275.408	756.396	353.877	241.951	736.258	267.254	-207.224	663.137	702.766	-169.677	735.868	431.515	-88.7258	756.718	442.511	-102.244	764.667	343.876	-66.2825	734.266	257.807
435	4.34	69.1612	1200.5	607.208	138.663	1194.31	656.545	-5.22477	1181.03	645.131	203.879	1033.13	773.65	-99.4528	1019.09	730.667	72.0346	971.5	647.381	320.2	689.535	717.308	338.062	740.62	438.952	255.241	753.51	447.113	275.411	756.413	353.88	241.941	736.304	267.261	-207.241	663.147	702.767	-169.671	735.882	431.484	-88.7311	756.764	442.467	-102.269	764.728	343.846	-66.3223	734.355	257.736
436	4.35	69.1659	1200.52	607.105	138.666	1194.32	656.466	-5.22604	1181.05	645.07	203.871	1033.14	773.62	-99.4566	1019.13	730.643	72.0263	971.562	647.279	320.216	689.497	717.294	338.039	740.654	438.924	255.25	753.528	447.092	275.42	756.424	353.899	241.915	736.339	267.263	-207.24	663.12	702.734	-169.671	735.882	431.491	-88.74	756.788	442.466	-102.295	764.751	343.88	-66.3664	734.409	257.672
437	4.36	69.1925	1200.5	607.113	138.691	1194.3	656.422	-5.21482	1181.02	645.04	203.87	1033.14	773.62	-99.451	1019.12	730.647	72.0422	971.55	647.28	320.22	689.466	717.287	338.045	740.639	438.93	255.249	753.51	447.112	275.418	756.419	353.922	241.907	736.333	267.281	-207.214	663.061	702.638	-169.677	735.864	431.498	-88.7506	756.783	442.486	-102.308	764.744	343.904	-66.3733	734.398	257.69
438	4.37	69.2395	1200.45	607.138	138.759	1194.27	656.419	-5.16887	1180.98	644.991	203.901	1033.13	773.591	-99.4206	1019.1	730.652	72.0748	971.509	647.401	320.21	689.453	717.278	338.056	740.618	438.93	255.257	753.504	447.127	275.419	756.409	353.908	241.913	736.296	267.281	-207.168	663.018	702.567	-169.674	735.87	431.51	-88.7343	756.75	442.527	-102.291	764.722	343.912	-66.3283	734.348	257.754
439	4.38	69.2689	1200.4	607.155	138.807	1194.23	656.414	-5.11086	1180.93	644.975	203.941	1033.09	773.572	-99.3803	1019.08	730.655	72.1242	971.438	647.504	320.184	689.466	717.278	338.093	740.578	438.956	255.266	753.5	447.092	275.411	756.397	353.859	241.914	736.273	267.236	-207.136	662.993	702.495	-169.678	735.883	431.502	-88.7128	756.719	442.505	-102.264	764.699	343.875	-66.2957	734.275	257.829
440	4.39	69.2776	1200.34	607.203	138.831	1194.18	656.4	-5.06341	1180.86	644.981	203.964	1033.06	773.558	-99.3583	1019.06	730.649	72.1552	971.367	647.583	320.161	689.494	717.289	338.127	740.534	438.993	255.266	753.479	447.097	275.388	756.38	353.801	241.923	736.245	267.244	-207.107	662.997	702.455	-169.671	735.893	431.504	-88.7008	756.692	442.508	-102.236	764.646	343.881	-66.2807	734.201	257.89
441	4.4	69.298	1200.29	607.168	138.858	1194.13	656.394	-5.02468	1180.83	644.995	203.982	1033.04	773.561	-99.3393	1019.05	730.629	72.1718	971.348	647.567	320.14	689.524	717.342	338.115	740.517	438.977	255.272	753.467	447.127	275.383	756.374	353.801	241.934	736.238	267.276	-207.127	663.062	702.591	-169.659	735.889	431.518	-88.6924	756.686	442.516	-102.233	764.602	343.916	-66.266	734.192	257.865
442	4.41	69.3323	1200.28	607.065	138.876	1194.12	656.322	-4.99999	1180.83	644.968	204.003	1033.04	773.542	-99.3204	1019.04	730.608	72.1777	971.364	647.456	320.158	689.514	717.363	338.106	740.509	438.929	255.284	753.466	447.097	275.39	756.376	353.811	241.929	736.242	267.27	-207.134	663.089	702.656	-169.647	735.88	431.528	-88.6754	756.688	442.493	-102.237	764.598	343.923	-66.2623	734.207	257.822
443	4.42	69.3273	1200.29	607.033	138.892	1194.13	656.307	-5.00691	1180.87	644.915	204.003	1033.06	773.53	-99.3222	1019.06	730.597	72.1682	971.412	647.432	320.202	689.481	717.332	338.097	740.535	438.936	255.276	753.475	447.09	275.403	756.391	353.858	241.914	736.259	267.27	-207.117	663.102	702.648	-169.652	735.866	431.517	-88.706	756.728	442.49	-102.252	764.647	343.91	-66.2896	734.237	257.808
444	4.43	69.3302	1200.32	607.018	138.891	1194.16	656.295	-5.0314	1180.91	644.917	203.999	1033.09	773.543	-99.3208	1019.11	730.607	72.1416	971.465	647.433	320.262	689.455	717.315	338.078	740.585	438.961	255.261	753.493	447.115	275.413	756.398	353.914	241.893	736.277	267.28	-207.078	663.087	702.64	-169.665	735.876	431.531	-88.735	756.752	442.494	-102.291	764.698	343.921	-66.3308	734.303	257.769
445	4.44	69.3509	1200.35	606.96	138.9	1194.18	656.263	-5.02257	1180.94	644.853	204.02	1033.11	773.525	-99.311	1019.15	730.6	72.1271	971.502	647.313	320.309	689.422	717.292	338.084	740.613	438.941	255.275	753.504	447.121	275.431	756.404	353.929	241.909	736.307	267.319	-207.062	663.09	702.628	-169.661	735.883	431.548	-88.7207	756.763	442.491	-102.298	764.718	343.95	-66.3506	734.367	257.734
446	4.45	69.3996	1200.34	606.936	138.944	1194.18	656.259	-4.99624	1180.93	644.818	204.039	1033.1	773.518	-99.2895	1019.15	730.595	72.1762	971.527	647.281	320.331	689.388	717.259	338.097	740.615	438.933	255.284	753.515	447.105	275.455	756.409	353.939	241.935	736.313	267.329	-207.071	663.08	702.646	-169.649	735.882	431.541	-88.7106	756.758	442.501	-102.278	764.723	343.926	-66.3377	734.372	257.722
447	4.46	69.4301	1200.31	606.968	138.988	1194.15	656.282	-4.97306	1180.89	644.831	204.045	1033.08	773.52	-99.2793	1019.12	730.602	72.1988	971.502	647.32	320.307	689.362	717.257	338.118	740.587	438.962	255.281	753.516	447.096	275.45	756.411	353.959	241.944	736.285	267.339	-207.06	663.034	702.625	-169.649	735.867	431.529	-88.7288	756.74	442.542	-102.278	764.686	343.959	-66.333	734.343	257.756
448	4.47	69.4398	1200.28	606.95	139.005	1194.12	656.278	-4.91851	1180.84	644.844	204.051	1033.05	773.505	-99.2761	1019.09	730.611	72.2316	971.457	647.394	320.275	689.369	717.287	338.122	740.556	438.957	255.27	753.502	447.07	275.422	756.41	353.926	241.929	736.269	267.293	-207.073	663.032	702.658	-169.656	735.859	431.537	-88.7275	756.714	442.557	-102.268	764.633	343.976	-66.32	734.296	257.773
449	4.48	69.4606	1200.24	606.941	139.017	1194.11	656.269	-4.85145	1180.8	644.856	204.074	1033.02	773.493	-99.2602	1019.09	730.623	72.2711	971.422	647.491	320.249	689.411	717.3	338.13	740.534	438.938	255.272	753.501	447.046	275.397	756.399	353.836	241.921	736.261	267.248	-207.099	663.071	702.711	-169.649	735.881	431.531	-88.6865	756.677	442.524	-102.249	764.611	343.932	-66.2974	734.253	257.771
450	4.49	69.4883	1200.2	606.977	139.049	1194.07	656.283	-4.81152	1180.76	644.874	204.102	1033.01	773.462	-99.2406	1019.1	730.596	72.305	971.377	647.572	320.227	689.456	717.307	338.133	740.511	438.935	255.279	753.495	447.077	275.381	756.38	353.777	241.914	736.253	267.218	-207.058	663.086	702.644	-169.644	735.885	431.52	-88.6671	756.641	442.544	-102.234	764.601	343.876	-66.2875	734.228	257.746
451	4.5	69.4776	1200.22	606.988	139.042	1194.07	656.259	-4.80123	1180.77	644.884	204.115	1033.02	773.454	-99.2267	1019.11	730.586	72.2968	971.365	647.6	320.221	689.485	717.322	338.117	740.51	438.936	255.281	753.488	447.092	275.371	756.39	353.78	241.895	736.257	267.199	-207.036	663.107	702.593	-169.652	735.89	431.518	-88.6707	756.644	442.539	-102.214	764.596	343.874	-66.2928	734.223	257.755
452	4.51	69.474	1200.27	606.908	139.025	1194.1	656.172	-4.81034	1180.84	644.821	204.115	1033.05	773.453	-99.2137	1019.14	730.591	72.283	971.435	647.469	320.25	689.482	717.328	338.092	740.543	438.884	255.287	753.501	447.073	275.374	756.411	353.798	241.886	736.285	267.199	-207.067	663.163	702.648	-169.645	735.893	431.517	-88.6785	756.705	442.469	-102.217	764.64	343.868	-66.3001	734.252	257.751
453	4.52	69.5003	1200.3	606.895	139.021	1194.13	656.146	-4.80994	1180.9	644.769	204.102	1033.08	773.445	-99.2078	1019.17	730.585	72.2764	971.523	647.358	320.293	689.448	717.321	338.076	740.576	438.87	255.289	753.494	447.069	275.383	756.419	353.83	241.879	736.296	267.238	-207.091	663.199	702.698	-169.642	735.882	431.519	-88.7063	756.743	442.432	-102.239	764.68	343.881	-66.3381	734.307	257.694
454	4.53	69.4962	1200.32	606.967	139.033	1194.14	656.197	-4.82718	1180.93	644.798	204.104	1033.1	773.499	-99.2167	1019.19	730.601	72.265	971.572	647.294	320.341	689.413	717.309	338.088	740.587	438.931	255.292	753.486	447.094	275.397	756.406	353.892	241.876	736.296	267.301	-207.073	663.164	702.631	-169.652	735.876	431.553	-88.7347	756.766	442.446	-102.259	764.701	343.932	-66.3732	734.341	257.698
455	4.54	69.5083	1200.34	606.965	139.067	1194.16	656.27	-4.83187	1180.98	644.819	204.12	1033.11	773.537	-99.2066	1019.21	730.624	72.2673	971.588	647.319	320.373	689.373	717.274	338.105	740.585	438.987	255.295	753.492	447.139	275.435	756.394	353.958	241.886	736.299	267.328	-207.062	663.14	702.566	-169.661	735.886	431.58	-88.7401	756.772	442.474	-102.269	764.716	343.948	-66.3689	734.355	257.718
456	4.55	69.5466	1200.36	606.917	139.121	1194.14	656.29	-4.78974	1180.96	644.814	204.156	1033.08	773.509	-99.1595	1019.19	730.612	72.3024	971.588	647.309	320.375	689.359	717.25	338.141	740.552	438.989	255.302	753.491	447.151	275.474	756.395	353.956	241.92	736.289	267.311	-207.078	663.161	702.577	-169.646	735.904	431.565	-88.711	756.76	442.48	-102.254	764.703	343.92	-66.3285	734.319	257.75
457	4.56	69.6021	1200.34	606.948	139.185	1194.1	656.331	-4.72071	1180.9	644.825	204.197	1033.04	773.471	-99.1217	1019.17	730.596	72.3793	971.552	647.426	320.364	689.367	717.26	338.178	740.504	438.979	255.321	753.495	447.124	275.472	756.4	353.916	241.947	736.276	267.278	-207.058	663.124	702.496	-169.629	735.914	431.529	-88.6785	756.735	442.518	-102.222	764.671	343.906	-66.2681	734.267	257.795
458	4.57	69.6394	1200.29	607.01	139.206	1194.08	656.344	-4.68461	1180.83	644.865	204.215	1033.02	773.47	-99.1107	1019.15	730.578	72.4196	971.526	647.47	320.322	689.377	717.274	338.198	740.477	438.993	255.323	753.489	447.098	275.446	756.392	353.875	241.954	736.255	267.286	-207.073	663.129	702.556	-169.627	735.909	431.502	-88.6615	756.699	442.529	-102.198	764.646	343.885	-66.2409	734.228	257.848
459	4.58	69.6429	1200.26	607.022	139.186	1194.08	656.317	-4.66683	1180.8	644.875	204.206	1032.99	773.445	-99.1085	1019.14	730.548	72.4062	971.499	647.491	320.277	689.389	717.283	338.174	740.473	438.968	255.316	753.467	447.093	275.401	756.392	353.828	241.926	736.239	267.256	-207.112	663.17	702.642	-169.635	735.897	431.503	-88.6595	756.68	442.527	-102.209	764.601	343.876	-66.25	734.197	257.818
460	4.59	69.6184	1200.27	606.961	139.15	1194.08	656.291	-4.67538	1180.81	644.893	204.178	1033	773.432	-99.1313	1019.15	730.55	72.3739	971.509	647.457	320.259	689.41	717.306	338.121	740.485	438.91	255.29	753.454	447.079	275.367	756.39	353.796	241.889	736.251	267.219	-207.082	663.144	702.572	-169.637	735.885	431.521	-88.6701	756.672	442.505	-102.236	764.596	343.884	-66.2764	734.188	257.777
461	4.6	69.5863	1200.29	607.015	139.118	1194.1	656.274	-4.71157	1180.86	644.915	204.157	1033.04	773.451	-99.1504	1019.2	730.569	72.3388	971.528	647.516	320.282	689.439	717.305	338.096	740.509	438.907	255.254	753.458	447.115	275.354	756.399	353.846	241.857	736.276	267.23	-207.066	663.163	702.561	-169.65	735.89	431.537	-88.7155	756.68	442.543	-102.262	764.632	343.93	-66.3185	734.217	257.787
462	4.61	69.5689	1200.31	607.016	139.113	1194.11	656.26	-4.74593	1180.93	644.888	204.146	1033.08	773.487	-99.1483	1019.24	730.57	72.3156	971.585	647.485	320.328	689.441	717.279	338.089	740.551	438.924	255.258	753.469	447.138	275.376	756.41	353.883	241.852	736.295	267.255	-207.075	663.231	702.613	-169.656	735.908	431.542	-88.741	756.722	442.547	-102.277	764.671	343.93	-66.3457	734.266	257.754
463	4.62	69.5886	1200.34	606.937	139.139	1194.14	656.236	-4.75889	1180.96	644.821	204.159	1033.09	773.495	-99.1454	1019.26	730.556	72.3413	971.651	647.388	320.366	689.434	717.279	338.099	740.579	438.893	255.271	753.486	447.117	275.409	756.415	353.893	241.88	736.308	267.267	-207.112	663.268	702.654	-169.642	735.91	431.517	-88.7132	756.748	442.445	-102.26	764.71	343.876	-66.3467	734.305	257.735
464	4.63	69.6066	1200.35	606.86	139.161	1194.15	656.239	-4.74321	1180.95	644.773	204.17	1033.09	773.506	-99.1367	1019.25	730.553	72.3601	971.693	647.352	320.38	689.407	717.261	338.118	740.584	438.901	255.279	753.508	447.071	275.426	756.406	353.922	241.905	736.306	267.294	-207.148	663.26	702.683	-169.634	735.902	431.51	-88.6938	756.755	442.432	-102.257	764.707	343.88	-66.3381	734.33	257.725
465	4.64	69.62	1200.35	606.884	139.186	1194.14	656.264	-4.71635	1180.93	644.786	204.186	1033.09	773.526	-99.1284	1019.24	730.569	72.3911	971.7	647.371	320.406	689.397	717.287	338.139	740.561	438.964	255.295	753.515	447.087	275.441	756.401	353.953	241.918	736.287	267.333	-207.141	663.217	702.627	-169.635	735.917	431.544	-88.6952	756.752	442.481	-102.247	764.689	343.891	-66.3068	734.324	257.769
466	4.65	69.6241	1200.34	606.878	139.204	1194.12	656.251	-4.70499	1180.88	644.817	204.196	1033.07	773.515	-99.1001	1019.21	730.567	72.4413	971.677	647.411	320.407	689.393	717.265	338.18	740.535	438.984	255.309	753.518	447.078	275.454	756.403	353.914	241.927	736.268	267.316	-207.108	663.171	702.556	-169.625	735.922	431.563	-88.6736	756.731	442.514	-102.228	764.661	343.877	-66.2676	734.281	257.809
467	4.66	69.6255	1200.29	606.92	139.195	1194.1	656.233	-4.68894	1180.82	644.831	204.193	1033.05	773.494	-99.0886	1019.19	730.525	72.462	971.637	647.465	320.366	689.4	717.249	338.183	740.504	438.954	255.316	753.501	447.052	275.435	756.394	353.845	241.932	736.255	267.266	-207.1	663.154	702.538	-169.627	735.908	431.522	-88.6522	756.69	442.5	-102.208	764.634	343.867	-66.2503	734.239	257.774
468	4.67	69.6193	1200.25	606.966	139.171	1194.08	656.252	-4.69903	1180.8	644.823	204.19	1033.05	773.51	-99.1035	1019.18	730.522	72.4653	971.607	647.558	320.335	689.439	717.282	338.167	740.5	438.92	255.318	753.485	447.045	275.407	756.391	353.828	241.916	736.254	267.24	-207.08	663.12	702.481	-169.637	735.9	431.525	-88.6682	756.673	442.508	-102.209	764.617	343.893	-66.2558	734.222	257.781
469	4.68	69.6053	1200.25	606.987	139.149	1194.09	656.252	-4.71139	1180.81	644.808	204.181	1033.07	773.529	-99.1215	1019.2	730.525	72.457	971.625	647.537	320.313	689.482	717.311	338.108	740.486	438.922	255.307	753.482	447.058	275.641	756.769	353.82	241.889	736.266	267.207	-207.067	663.12	702.467	-169.641	735.9	431.531	-88.6783	756.686	442.509	-102.214	764.617	343.871	-66.2716	734.213	257.781
470	4.69	69.5929	1200.28	606.932	139.11	1194.12	656.207	-4.71415	1180.83	644.776	204.175	1033.09	773.511	-99.1239	1019.22	730.52	72.4371	971.656	647.448	320.305	689.515	717.353	338.051	740.461	438.943	255.305	753.488	447.076	275.974	757.247	353.832	241.866	736.296	267.179	-207.069	663.123	702.445	-169.632	735.893	431.526	-88.6738	756.719	442.475	-102.222	764.624	343.862	-66.298	734.224	257.746
471	4.7	69.5766	1200.32	606.939	139.098	1194.16	656.214	-4.73762	1180.88	644.797	204.174	1033.13	773.524	-99.129	1019.24	730.525	72.4341	971.702	647.409	320.328	689.513	717.347	338.098	740.54	438.939	255.311	753.487	447.104	275.546	756.628	353.874	241.866	736.314	267.239	-207.118	663.209	702.581	-169.636	735.915	431.534	-88.676	756.752	442.464	-102.24	764.656	343.904	-66.3084	734.259	257.744
472	4.71	69.5459	1200.35	606.974	139.103	1194.18	656.242	-4.76494	1180.91	644.837	204.18	1033.15	773.541	-99.108	1019.27	730.547	72.4127	971.739	647.448	320.399	689.5	717.313	338.125	740.575	438.971	255.319	753.499	447.129	275.456	756.481	353.932	241.88	736.316	267.295	-207.127	663.256	702.628	-169.619	735.941	431.555	-88.681	756.772	442.484	-102.254	764.708	343.919	-66.3012	734.286	257.759
473	4.72	69.5432	1200.35	606.905	139.121	1194.18	656.243	-4.76986	1180.92	644.805	204.199	1033.16	773.517	-99.0872	1019.29	730.55	72.4253	971.731	647.411	320.454	689.494	717.287	338.158	740.557	438.971	255.329	753.506	447.118	275.457	756.437	353.954	241.901	736.308	267.291	-207.152	663.307	702.64	-169.598	735.956	431.52	-88.6754	756.785	442.455	-102.235	764.724	343.895	-66.2856	734.293	257.767
474	4.73	69.5356	1200.34	606.848	139.125	1194.16	656.224	-4.77395	1180.91	644.755	204.209	1033.14	773.489	-99.0836	1019.25	730.521	72.4359	971.731	647.331	320.462	689.474	717.273	338.179	740.529	438.983	255.335	753.497	447.093	275.461	756.412	353.943	241.927	736.287	267.303	-207.169	663.294	702.634	-169.597	735.944	431.482	-88.6703	756.781	442.45	-102.219	764.702	343.884	-66.2818	734.281	257.741
475	4.74	69.506	1200.33	606.844	139.106	1194.14	656.188	-4.80596	1180.89	644.767	204.192	1033.12	773.465	-99.1103	1019.22	730.505	72.4125	971.718	647.36	320.467	689.433	717.217	338.168	740.507	438.992	255.324	753.48	447.094	275.449	756.391	353.935	241.923	736.271	267.309	-207.159	663.239	702.573	-169.631	735.926	431.504	-88.6969	756.766	442.453	-102.235	764.661	343.904	-66.3034	734.276	257.73
476	4.75	69.465	1200.29	606.861	139.083	1194.11	656.151	-4.82584	1180.84	644.81	204.177	1033.09	773.43	-99.119	1019.2	730.5	72.3846	971.686	647.4	320.454	689.417	717.216	338.169	740.486	438.967	255.298	753.463	447.098	275.429	756.376	353.931	241.902	736.251	267.306	-207.174	663.225	702.609	-169.649	735.901	431.539	-88.7096	756.727	442.48	-102.251	764.622	343.906	-66.3235	734.244	257.738
477	4.76	69.4442	1200.26	606.885	139.054	1194.1	656.139	-4.84459	1180.78	644.825	204.17	1033.08	773.411	-99.1233	1019.18	730.471	72.3889	971.636	647.466	320.445	689.439	717.251	338.158	740.467	438.927	255.276	753.45	447.078	275.412	756.376	353.895	241.897	736.24	267.281	-207.179	663.206	702.604	-169.661	735.889	431.517	-88.7262	756.669	442.526	-102.248	764.595	343.888	-66.3197	734.208	257.766
478	4.77	69.4216	1200.24	606.885	139.036	1194.11	656.145	-4.85225	1180.74	644.831	204.154	1033.08	773.412	-99.1319	1019.18	730.456	72.379	971.621	647.526	320.409	689.477	717.24	338.146	740.463	438.931	255.267	753.448	447.074	275.393	756.384	353.866	241.89	736.242	267.276	-207.139	663.149	702.511	-169.682	735.882	431.517	-88.7313	756.633	442.573	-102.269	764.586	343.889	-66.3233	734.202	257.789
479	4.78	69.3962	1200.25	606.869	139.02	1194.13	656.11	-4.85133	1180.75	644.837	204.157	1033.11	773.41	-99.1358	1019.21	730.46	72.3785	971.639	647.471	320.392	689.528	717.249	338.132	740.483	438.932	255.276	753.459	447.074	275.384	756.402	353.832	241.89	736.279	267.248	-207.114	663.149	702.461	-169.683	735.901	431.533	-88.7208	756.665	442.573	-102.269	764.591	343.894	-66.317	734.219	257.81
480	4.79	69.4152	1200.28	606.786	139.024	1194.17	656.049	-4.86705	1180.8	644.777	204.184	1033.16	773.39	-99.1341	1019.25	730.448	72.4162	971.694	647.309	320.414	689.567	717.3	338.13	740.52	438.879	255.296	753.487	447.069	275.386	756.43	353.815	241.882	736.315	267.179	-207.095	663.171	702.487	-169.643	735.924	431.5	-88.6841	756.714	442.542	-102.234	764.62	343.89	-66.2989	734.26	257.766
481	4.8	69.432	1200.32	606.756	139	1194.2	655.961	-4.88138	1180.86	644.697	204.179	1033.2	773.371	-99.1352	1019.31	730.454	72.4083	971.786	647.117	320.447	689.567	717.312	338.121	740.56	438.843	255.324	753.516	447.064	275.403	756.458	353.857	241.879	736.35	267.16	-207.092	663.191	702.532	-169.604	735.935	431.492	-88.6679	756.76	442.497	-102.218	764.667	343.893	-66.284	734.313	257.696
482	4.81	69.4124	1200.34	606.737	138.952	1194.22	655.911	-4.90874	1180.91	644.655	204.158	1033.22	773.365	-99.1637	1019.33	730.455	72.372	971.85	647.015	320.483	689.546	717.298	338.104	740.585	438.847	255.333	753.534	447.078	275.418	756.465	353.909	241.88	736.358	267.206	-207.112	663.229	702.576	-169.601	735.938	431.519	-88.6802	756.787	442.461	-102.244	764.704	343.903	-66.3119	734.367	257.661
483	4.82	69.384	1200.33	606.702	138.937	1194.21	655.91	-4.93559	1180.92	644.649	204.157	1033.23	773.334	-99.1792	1019.33	730.444	72.3587	971.822	647.089	320.518	689.518	717.256	338.11	740.581	438.88	255.327	753.517	447.101	275.431	756.452	353.914	241.872	736.339	267.25	-207.136	663.253	702.601	-169.618	735.929	431.526	-88.6963	756.797	442.48	-102.27	764.722	343.893	-66.3397	734.376	257.671
484	4.83	69.3695	1200.28	606.658	138.959	1194.15	655.892	-4.94437	1180.89	644.622	204.167	1033.21	773.291	-99.1821	1019.31	730.409	72.3395	971.771	647.153	320.561	689.508	717.225	338.144	740.537	438.903	255.318	753.486	447.097	275.447	756.42	353.91	241.901	736.285	267.277	-207.145	663.276	702.648	-169.621	735.913	431.511	-88.692	756.774	442.459	-102.256	764.691	343.893	-66.322	734.312	257.7
485	4.84	69.3621	1200.21	606.675	138.964	1194.08	655.893	-4.94112	1180.81	644.612	204.165	1033.18	773.278	-99.186	1019.26	730.381	72.3254	971.719	647.186	320.57	689.503	717.192	338.182	740.481	438.931	255.31	753.449	447.103	275.455	756.38	353.924	241.931	736.238	267.305	-207.147	663.26	702.611	-169.644	735.886	431.527	-88.6929	756.729	442.522	-102.246	764.648	343.897	-66.2931	734.243	257.752
486	4.85	69.348	1200.16	606.688	138.954	1194.04	655.909	-4.95249	1180.73	644.618	204.146	1033.16	773.295	-99.196	1019.21	730.369	72.3117	971.671	647.243	320.546	689.505	717.199	338.197	740.445	438.985	255.301	753.428	447.119	275.435	756.367	353.914	241.923	736.209	267.326	-207.139	663.206	702.489	-169.664	735.868	431.533	-88.7035	756.71	442.546	-102.249	764.611	343.887	-66.2754	734.215	257.808
487	4.86	69.3549	1200.15	606.628	138.954	1194.04	655.89	-4.94946	1180.7	644.58	204.128	1033.17	773.291	-99.197	1019.23	730.367	72.337	971.694	647.229	320.502	689.52	717.212	338.203	740.458	439.015	255.301	753.453	447.122	275.42	756.385	353.902	241.92	736.228	267.307	-207.14	663.16	702.431	-169.656	735.883	431.54	-88.6973	756.718	442.531	-102.241	764.6	343.889	-66.2622	734.212	257.815
488	4.87	69.3655	1200.16	606.525	138.948	1194.09	655.818	-4.94258	1180.71	644.536	204.119	1033.21	773.289	-99.2049	1019.26	730.362	72.3609	971.763	647.144	320.479	689.558	717.242	338.184	740.505	438.965	255.322	753.485	447.087	275.42	756.418	353.875	241.923	736.271	267.249	-207.189	663.184	702.497	-169.627	735.916	431.532	-88.6857	756.735	442.497	-102.216	764.626	343.877	-66.2301	734.212	257.797
489	4.88	69.3659	1200.15	606.453	138.925	1194.11	655.752	-4.96515	1180.74	644.502	204.103	1033.26	773.286	-99.2316	1019.28	730.352	72.3757	971.806	647.145	320.455	689.6	717.253	338.162	740.532	438.931	255.342	753.502	447.071	275.413	756.44	353.857	241.926	736.301	267.226	-207.236	663.231	702.599	-169.618	735.93	431.495	-88.6791	756.76	442.495	-102.213	764.65	343.857	-66.2218	734.235	257.781
490	4.89	69.3477	1200.15	606.466	138.889	1194.12	655.721	-4.99219	1180.76	644.435	204.082	1033.29	773.306	-99.2719	1019.31	730.307	72.3445	971.82	647.119	320.446	689.63	717.233	338.139	740.556	438.907	255.337	753.502	447.075	275.396	756.436	353.854	241.906	736.322	267.214	-207.226	663.257	702.583	-169.624	735.932	431.469	-88.6994	756.775	442.497	-102.236	764.679	343.871	-66.2403	734.262	257.761
491	4.9	69.2923	1200.14	606.495	138.84	1194.13	655.688	-5.04274	1180.77	644.42	204.048	1033.31	773.316	-99.2939	1019.34	730.295	72.2968	971.818	647.104	320.471	689.663	717.258	338.104	740.577	438.878	255.318	753.49	447.083	275.391	756.421	353.85	241.875	736.337	267.218	-207.249	663.292	702.577	-169.645	735.935	431.487	-88.7207	756.785	442.466	-102.26	764.701	343.899	-66.2818	734.28	257.734
492	4.91	69.2523	1200.1	606.511	138.789	1194.11	655.668	-5.09983	1180.77	644.461	204.016	1033.31	773.328	-99.3186	1019.33	730.291	72.2483	971.825	647.095	320.514	689.653	717.27	338.088	740.571	438.88	255.274	753.483	447.085	275.39	756.407	353.881	241.862	736.309	267.254	-207.246	663.298	702.608	-169.662	735.915	431.507	-88.7393	756.769	442.48	-102.287	764.699	343.886	-66.3361	734.289	257.721
493	4.92	69.2314	1200.08	606.579	138.767	1194.08	655.7	-5.12573	1180.75	644.474	204	1033.31	773.337	-99.3339	1019.3	730.304	72.2202	971.828	647.14	320.537	689.619	717.232	338.094	740.557	438.909	255.257	753.484	447.079	275.392	756.387	353.91	241.866	736.273	267.298	-207.247	663.276	702.548	-169.678	735.888	431.503	-88.7474	756.758	442.505	-102.309	764.7	343.889	-66.3616	734.287	257.728
494	4.93	69.2223	1200.07	606.575	138.761	1194.08	655.719	-5.12887	1180.72	644.463	203.992	1033.3	773.337	-99.346	1019.28	730.315	72.218	971.839	647.159	320.559	689.623	717.218	338.114	740.549	438.929	255.26	753.494	447.061	275.404	756.388	353.911	241.881	736.258	267.295	-207.233	663.216	702.474	-169.669	735.887	431.484	-88.7494	756.763	442.49	-102.279	764.693	343.893	-66.3501	734.281	257.748
495	4.94	69.2356	1200.07	606.489	138.777	1194.08	655.73	-5.12674	1180.71	644.474	203.989	1033.31	773.35	-99.3286	1019.27	730.325	72.2564	971.847	647.129	320.56	689.637	717.225	338.151	740.531	438.922	255.279	753.506	447.027	275.414	756.393	353.877	241.915	736.263	267.265	-207.227	663.168	702.432	-169.657	735.885	431.452	-88.7288	756.754	442.465	-102.247	764.67	343.881	-66.3284	734.278	257.704
496	4.95	69.2336	1200.09	606.43	138.803	1194.08	655.783	-5.1048	1180.67	644.489	203.998	1033.3	773.373	-99.3252	1019.26	730.327	72.2875	971.837	647.188	320.543	689.663	717.231	338.178	740.52	438.922	255.304	753.519	447.016	275.426	756.412	353.876	241.944	736.265	267.262	-207.258	663.165	702.475	-169.653	735.895	431.469	-88.7022	756.73	442.509	-102.221	764.641	343.87	-66.2849	734.272	257.71
497	4.96	69.2206	1200.1	606.449	138.79	1194.1	655.82	-5.10846	1180.65	644.504	203.993	1033.3	773.396	-99.34	1019.26	730.34	72.2822	971.832	647.269	320.513	689.712	717.265	338.188	740.525	438.911	255.314	753.51	447.03	275.405	756.419	353.847	241.942	736.278	267.254	-207.225	663.081	702.338	-169.651	735.909	431.479	-88.6885	756.714	442.527	-102.216	764.619	343.867	-66.2383	734.263	257.759
498	4.97	69.1847	1200.09	606.511	138.735	1194.11	655.808	-5.14426	1180.65	644.546	203.976	1033.32	773.402	-99.3648	1019.26	730.344	72.2748	971.837	647.346	320.492	689.746	717.274	338.161	740.547	438.888	255.308	753.513	447.052	275.386	756.425	353.827	241.908	736.288	267.228	-207.234	663.09	702.333	-169.65	735.911	431.478	-88.6962	756.716	442.505	-102.225	764.633	343.835	-66.255	734.275	257.746
499	4.98	69.1436	1200.08	606.595	138.693	1194.15	655.815	-5.18679	1180.67	644.596	203.953	1033.35	773.396	-99.4053	1019.28	730.349	72.2627	971.859	647.302	320.486	689.789	717.275	338.129	740.574	438.874	255.29	753.512	447.049	275.377	756.427	353.814	241.872	736.308	267.197	-207.267	663.166	702.43	-169.658	735.914	431.49	-88.7181	756.746	442.502	-102.236	764.652	343.829	-66.2811	734.271	257.724
500	4.99	69.1186	1200.09	606.705	138.638	1194.17	655.8	-5.22523	1180.71	644.61	203.927	1033.37	773.401	-99.4337	1019.3	730.339	72.2166	971.896	647.25	320.492	689.804	717.246	338.098	740.591	438.837	255.273	753.504	447.067	275.365	756.436	353.814	241.862	736.323	267.205	-207.333	663.259	702.585	-169.664	735.915	431.47	-88.7257	756.764	442.508	-102.247	764.666	343.846	-66.2871	734.265	257.707
501	5	69.0878	1200.13	606.771	138.619	1194.19	655.848	-5.25969	1180.75	644.636	203.913	1033.39	773.405	-99.448	1019.33	730.346	72.1915	971.95	647.186	320.516	689.82	717.248	338.094	740.624	438.845	255.283	753.513	447.088	275.379	756.436	353.855	241.864	736.329	267.231	-207.342	663.284	702.61	-169.666	735.915	431.462	-88.7205	756.777	442.478	-102.269	764.704	343.855	-66.2959	734.279	257.71
502	5.01	69.0487	1200.19	606.729	138.604	1194.22	655.89	-5.28509	1180.79	644.669	203.913	1033.4	773.44	-99.4459	1019.35	730.377	72.1813	972.005	647.126	320.572	689.804	717.259	338.11	740.633	438.877	255.307	753.529	447.105	275.409	756.421	353.914	241.88	736.326	267.265	-207.318	663.305	702.651	-169.652	735.934	431.484	-88.7134	756.796	442.462	-102.265	764.736	343.864	-66.322	734.314	257.716
503	5.02	69.0249	1200.23	606.709	138.598	1194.21	655.923	-5.30727	1180.81	644.722	203.925	1033.4	773.46	-99.4358	1019.34	730.403	72.1907	972.021	647.21	320.611	689.762	717.242	338.135	740.623	438.931	255.318	753.526	447.105	275.442	756.399	353.949	241.903	736.3	267.303	-207.288	663.279	702.598	-169.643	735.938	431.485	-88.7203	756.805	442.471	-102.248	764.728	343.853	-66.3059	734.321	257.727
504	5.03	69.0257	1200.23	606.814	138.606	1194.2	656.008	-5.32581	1180.8	644.778	203.94	1033.38	773.476	-99.4181	1019.3	730.441	72.1988	971.993	647.316	320.632	689.74	717.226	338.176	740.577	438.983	255.333	753.516	447.094	275.461	756.381	353.961	241.945	736.271	267.357	-207.238	663.207	702.486	-169.639	735.935	431.483	-88.7199	756.79	442.492	-102.237	764.718	343.856	-66.2706	734.289	257.76
505	5.04	69.024	1200.21	606.947	138.609	1194.19	656.081	-5.33533	1180.78	644.823	203.953	1033.35	773.493	-99.3892	1019.26	730.48	72.2209	971.948	647.435	320.613	689.756	717.241	338.202	740.536	439.002	255.338	753.512	447.088	275.46	756.379	353.968	241.959	736.241	267.35	-207.212	663.163	702.414	-169.642	735.922	431.481	-88.7126	756.765	442.498	-102.232	764.701	343.862	-66.2399	734.251	257.795
506	5.05	69.0132	1200.19	607.001	138.588	1194.2	656.106	-5.32881	1180.76	644.839	203.954	1033.34	773.514	-99.4007	1019.25	730.493	72.2299	971.929	647.442	320.572	689.786	717.253	338.197	740.532	438.987	255.32	753.491	447.08	275.434	756.389	353.93	241.944	736.244	267.31	-207.205	663.137	702.399	-169.64	735.91	431.497	-88.7004	756.748	442.501	-102.222	764.643	343.901	-66.242	734.215	257.806
507	5.06	68.9767	1200.2	607.051	138.546	1194.22	656.099	-5.35107	1180.75	644.919	203.923	1033.34	773.524	-99.4358	1019.24	730.494	72.2038	971.93	647.471	320.519	689.804	717.25	338.154	740.534	438.937	255.297	753.477	447.087	275.388	756.383	353.858	241.92	736.255	267.277	-207.207	663.102	702.353	-169.648	735.896	431.487	-88.7062	756.732	442.525	-102.221	764.619	343.897	-66.2617	734.197	257.792
508	5.07	68.9475	1200.21	607.081	138.493	1194.25	656.112	-5.38941	1180.76	644.967	203.891	1033.34	773.514	-99.4716	1019.24	730.53	72.1821	971.909	647.548	320.468	689.832	717.265	338.124	740.557	438.906	255.287	753.471	447.084	275.356	756.39	353.83	241.874	736.272	267.227	-207.205	663.081	702.349	-169.676	735.882	431.497	-88.7213	756.736	442.509	-102.245	764.626	343.881	-66.2762	734.198	257.787
509	5.08	68.9063	1200.22	607.073	138.439	1194.27	656.131	-5.4142	1180.78	644.995	203.874	1033.35	773.516	-99.4972	1019.26	730.525	72.1357	971.922	647.467	320.456	689.849	717.262	338.074	740.586	438.866	255.27	753.473	447.079	275.354	756.401	353.848	241.841	736.277	267.197	-207.217	663.146	702.443	-169.681	735.882	431.493	-88.7452	756.732	442.465	-102.277	764.648	343.87	-66.3042	734.217	257.771
510	5.09	68.8843	1200.28	607.045	138.416	1194.31	656.16	-5.43143	1180.83	645.019	203.866	1033.39	773.536	-99.5031	1019.31	730.515	72.0968	971.999	647.308	320.483	689.858	717.295	338.037	740.619	438.818	255.252	753.492	447.077	275.352	756.413	353.844	241.835	736.299	267.199	-207.228	663.228	702.578	-169.677	735.896	431.487	-88.7602	756.753	442.468	-102.296	764.664	343.868	-66.3419	734.262	257.716
511	5.1	68.8784	1200.34	607.043	138.443	1194.35	656.218	-5.44067	1180.88	645.034	203.88	1033.41	773.548	-99.4868	1019.34	730.526	72.0802	972.073	647.209	320.527	689.838	717.281	338.062	740.639	438.863	255.253	753.528	447.085	275.38	756.425	353.881	241.85	736.314	267.232	-207.223	663.238	702.557	-169.666	735.928	431.485	-88.7597	756.779	442.496	-102.288	764.703	343.869	-66.3454	734.322	257.711
512	5.11	68.9013	1200.38	607.095	138.488	1194.38	656.268	-5.42042	1180.91	645.041	203.897	1033.41	773.552	-99.4602	1019.34	730.506	72.117	972.1	647.224	320.565	689.796	717.226	338.109	740.639	438.912	255.273	753.563	447.082	275.415	756.427	353.908	241.887	736.308	267.273	-207.219	663.208	702.485	-169.647	735.945	431.492	-88.734	756.797	442.489	-102.264	764.715	343.878	-66.3128	734.356	257.699
513	5.12	68.9385	1200.39	607.113	138.523	1194.36	656.314	-5.38677	1180.91	645.023	203.932	1033.38	773.554	-99.4246	1019.33	730.523	72.171	972.098	647.226	320.586	689.764	717.217	338.162	740.616	438.921	255.316	753.573	447.051	275.436	756.419	353.903	241.921	736.292	267.282	-207.266	663.252	702.572	-169.627	735.943	431.489	-88.7069	756.799	442.452	-102.23	764.711	343.826	-66.2771	734.341	257.675
514	5.13	68.9536	1200.38	607.13	138.548	1194.33	656.354	-5.36549	1180.89	645.037	203.947	1033.35	773.532	-99.4137	1019.31	730.541	72.2026	972.058	647.304	320.583	689.743	717.218	338.186	740.586	438.916	255.336	753.554	447.035	275.442	756.406	353.9	241.945	736.276	267.317	-207.318	663.297	702.649	-169.622	735.934	431.478	-88.7002	756.776	442.495	-102.212	764.684	343.837	-66.2674	734.305	257.719
515	5.14	68.9442	1200.35	607.211	138.53	1194.32	656.369	-5.3812	1180.88	645.096	203.936	1033.34	773.523	-99.4345	1019.31	730.553	72.1866	972.002	647.422	320.557	689.75	717.224	338.174	740.578	438.891	255.311	753.524	447.066	275.416	756.395	353.878	241.908	736.274	267.295	-207.349	663.298	702.643	-169.648	735.925	431.474	-88.723	756.748	442.542	-102.231	764.648	343.854	-66.2776	734.275	257.776
516	5.15	68.9326	1200.33	607.279	138.498	1194.31	656.345	-5.39694	1180.88	645.131	203.904	1033.32	773.529	-99.4579	1019.32	730.524	72.1619	971.947	647.504	320.49	689.768	717.205	338.146	740.581	438.864	255.283	753.498	447.092	275.392	756.389	353.845	241.871	736.277	267.263	-207.325	663.224	702.472	-169.665	735.896	431.471	-88.7387	756.728	442.559	-102.249	764.64	343.841	-66.2969	734.249	257.796
517	5.16	68.9415	1200.32	607.318	138.492	1194.31	656.317	-5.40427	1180.88	645.138	203.889	1033.33	773.541	-99.4778	1019.33	730.535	72.1649	971.94	647.506	320.441	689.795	717.221	338.11	740.601	438.833	255.27	753.497	447.09	275.369	756.4	353.817	241.849	736.276	267.243	-207.331	663.213	702.486	-169.67	735.889	431.492	-88.7505	756.728	442.564	-102.264	764.63	343.871	-66.3008	734.235	257.785
518	5.17	68.9708	1200.33	607.307	138.51	1194.33	656.325	-5.37941	1180.91	645.138	203.897	1033.35	773.556	-99.4808	1019.33	730.54	72.1603	971.967	647.459	320.429	689.811	717.257	338.095	740.615	438.849	255.282	753.506	447.091	275.355	756.417	353.801	241.85	736.285	267.243	-207.344	663.221	702.504	-169.66	735.911	431.512	-88.7468	756.753	442.561	-102.266	764.646	343.861	-66.2803	734.237	257.784
519	5.18	69.0145	1200.37	607.204	138.546	1194.35	656.295	-5.33824	1180.94	645.064	203.92	1033.37	773.559	-99.4595	1019.35	730.524	72.1877	972.016	647.372	320.443	689.803	717.273	338.12	740.611	438.865	255.316	753.536	447.081	275.378	756.425	353.829	241.87	736.295	267.251	-207.315	663.214	702.407	-169.641	735.935	431.48	-88.7167	756.783	442.493	-102.234	764.677	343.843	-66.2465	734.248	257.779
520	5.19	69.0619	1200.39	607.164	138.609	1194.36	656.317	-5.29364	1180.97	645.007	203.942	1033.39	773.526	-99.4358	1019.37	730.478	72.2135	972.057	647.258	320.474	689.8	717.26	338.157	740.605	438.899	255.336	753.554	447.067	275.411	756.418	353.863	241.898	736.301	267.263	-207.272	663.229	702.34	-169.616	735.972	431.448	-88.6898	756.807	442.448	-102.219	764.703	343.84	-66.2274	734.274	257.765
521	5.2	69.082	1200.4	607.174	138.64	1194.35	656.349	-5.28683	1181	644.985	203.958	1033.4	773.534	-99.4076	1019.37	730.473	72.2057	972.082	647.192	320.523	689.784	717.242	338.168	740.6	438.96	255.323	753.548	447.061	275.429	756.396	353.875	241.907	736.291	267.296	-207.302	663.311	702.449	-169.615	735.988	431.44	-88.6955	756.817	442.458	-102.224	764.72	343.81	-66.2344	734.28	257.779
522	5.21	69.0667	1200.4	607.077	138.634	1194.34	656.325	-5.30255	1181	644.983	203.955	1033.39	773.556	-99.4145	1019.37	730.494	72.1609	972.109	647.197	320.55	689.75	717.224	338.136	740.605	438.955	255.302	753.534	447.089	275.421	756.392	353.906	241.889	736.281	267.321	-207.341	663.346	702.518	-169.642	735.979	431.477	-88.7274	756.822	442.469	-102.25	764.714	343.836	-66.2892	734.295	257.761
523	5.22	69.0503	1200.38	607.019	138.625	1194.32	656.296	-5.30619	1180.96	644.961	203.94	1033.38	773.53	-99.4249	1019.36	730.466	72.1499	972.084	647.198	320.557	689.72	717.214	338.126	740.598	438.938	255.285	753.503	447.107	275.418	756.38	353.926	241.87	736.258	267.337	-207.341	663.302	702.446	-169.677	735.944	431.468	-88.7408	756.807	442.457	-102.269	764.7	343.854	-66.3118	734.283	257.747
524	5.23	69.0611	1200.31	607.024	138.629	1194.28	656.255	-5.30119	1180.91	644.951	203.928	1033.35	773.493	-99.436	1019.34	730.422	72.1477	972.005	647.254	320.53	689.712	717.217	338.121	740.573	438.908	255.272	753.481	447.093	275.414	756.365	353.916	241.87	736.223	267.313	-207.33	663.265	702.427	-169.692	735.899	431.444	-88.7443	756.763	442.467	-102.273	764.673	343.854	-66.3049	734.244	257.727
525	5.24	69.0837	1200.24	607.045	138.63	1194.25	656.184	-5.28221	1180.87	644.941	203.934	1033.32	773.486	-99.4369	1019.31	730.42	72.1579	971.916	647.337	320.496	689.713	717.218	338.116	740.561	438.9	255.284	753.475	447.08	275.387	756.352	353.875	241.863	736.214	267.266	-207.344	663.273	702.463	-169.696	735.868	431.456	-88.7486	756.73	442.468	-102.257	764.64	343.837	-66.3105	734.21	257.724
526	5.25	69.0933	1200.21	607.01	138.642	1194.23	656.134	-5.25584	1180.83	644.904	203.948	1033.31	773.495	-99.4279	1019.31	730.436	72.1822	971.879	647.346	320.46	689.739	717.215	338.12	740.551	438.888	255.268	753.477	447.083	275.366	756.353	353.822	241.862	736.227	267.25	-207.335	663.237	702.379	-169.691	735.881	431.454	-88.728	756.701	442.495	-102.236	764.621	343.835	-66.2945	734.181	257.762
527	5.26	69.1001	1200.22	606.93	138.654	1194.24	656.107	-5.22688	1180.82	644.883	203.965	1033.31	773.49	-99.4237	1019.33	730.445	72.212	971.879	647.369	320.422	689.756	717.222	338.12	740.557	438.863	255.262	753.499	447.087	275.35	756.379	353.795	241.858	736.259	267.24	-207.317	663.204	702.349	-169.688	735.92	431.433	-88.7204	756.704	442.526	-102.256	764.626	343.831	-66.2916	734.183	257.777
528	5.27	69.1167	1200.24	606.874	138.647	1194.25	656.108	-5.2092	1180.82	644.871	203.972	1033.32	773.495	-99.4165	1019.35	730.454	72.2216	971.905	647.349	320.411	689.756	717.233	338.111	740.583	438.881	255.269	753.535	447.072	275.337	756.409	353.798	241.843	736.289	267.238	-207.35	663.224	702.423	-169.681	735.943	431.45	-88.7234	756.733	442.507	-102.263	764.639	343.83	-66.3005	734.241	257.751
529	5.28	69.1371	1200.25	606.829	138.664	1194.26	656.108	-5.21139	1180.85	644.832	203.973	1033.35	773.5	-99.4009	1019.37	730.458	72.2287	971.948	647.256	320.436	689.751	717.257	338.12	740.608	438.884	255.281	753.56	447.075	275.35	756.424	353.83	241.842	736.316	267.24	-207.378	663.302	702.536	-169.669	735.955	431.481	-88.7195	756.766	442.487	-102.255	764.655	343.877	-66.2957	734.287	257.732
530	5.29	69.1744	1200.25	606.806	138.702	1194.26	656.062	-5.18162	1180.88	644.778	203.989	1033.36	773.492	-99.3712	1019.39	730.452	72.2684	971.998	647.152	320.48	689.755	717.259	338.143	740.635	438.885	255.325	753.568	447.064	275.39	756.43	353.846	241.865	736.311	267.248	-207.357	663.343	702.535	-169.645	735.972	431.455	-88.6896	756.796	442.452	-102.244	764.692	343.858	-66.2897	734.309	257.708
531	5.3	69.1949	1200.22	606.77	138.719	1194.25	656.024	-5.16516	1180.88	644.739	204.001	1033.37	773.457	-99.356	1019.38	730.421	72.2761	972.006	647.108	320.519	689.731	717.233	338.145	740.638	438.87	255.35	753.566	447.034	275.43	756.417	353.878	241.874	736.292	267.267	-207.33	663.344	702.501	-169.635	735.961	431.424	-88.6808	756.81	442.451	-102.226	764.704	343.819	-66.2807	734.323	257.688
532	5.31	69.1953	1200.18	606.784	138.72	1194.24	656.014	-5.16996	1180.87	644.717	204	1033.36	773.442	-99.3663	1019.38	730.405	72.2541	971.979	647.118	320.536	689.71	717.227	338.152	740.622	438.893	255.322	753.542	447.062	275.435	756.397	353.915	241.879	736.28	267.319	-207.312	663.346	702.473	-169.644	735.949	431.447	-88.6961	756.794	442.488	-102.236	764.701	343.835	-66.3009	734.308	257.714
533	5.32	69.1881	1200.15	606.805	138.719	1194.22	656.006	-5.17497	1180.86	644.71	204.001	1033.35	773.454	-99.369	1019.37	730.416	72.2417	971.955	647.198	320.543	689.691	717.226	338.15	740.613	438.916	255.297	753.527	447.086	275.426	756.386	353.923	241.882	736.264	267.339	-207.357	663.367	702.585	-169.656	735.933	431.485	-88.7137	756.764	442.523	-102.266	764.689	343.847	-66.3136	734.284	257.728
534	5.33	69.1968	1200.12	606.748	138.74	1194.2	655.994	-5.15468	1180.81	644.68	204.007	1033.32	773.424	-99.3633	1019.35	730.397	72.2614	971.915	647.184	320.531	689.675	717.22	338.161	740.587	438.913	255.295	753.512	447.069	275.414	756.373	353.899	241.878	736.245	267.298	-207.366	663.332	702.574	-169.672	735.907	431.483	-88.7155	756.753	442.511	-102.261	764.651	343.859	-66.3004	734.258	257.74
535	5.34	69.2224	1200.1	606.709	138.766	1194.16	655.988	-5.12749	1180.76	644.654	204.019	1033.3	773.412	-99.3448	1019.33	730.393	72.3132	971.881	647.205	320.479	689.67	717.219	338.169	740.545	438.896	255.293	753.505	447.05	275.407	756.365	353.869	241.882	736.23	267.283	-207.329	663.26	702.467	-169.665	735.89	431.466	-88.7092	756.733	442.514	-102.249	764.618	343.823	-66.2682	734.217	257.763
536	5.35	69.2358	1200.12	606.691	138.778	1194.16	655.968	-5.09447	1180.74	644.659	204.035	1033.3	773.414	-99.3361	1019.33	730.391	72.3404	971.882	647.265	320.427	689.697	717.255	338.182	740.542	438.901	255.302	753.514	447.063	275.399	756.377	353.85	241.886	736.241	267.267	-207.322	663.25	702.425	-169.646	735.926	431.467	-88.6919	756.733	442.544	-102.213	764.611	343.829	-66.2244	734.211	257.818
537	5.36	69.2539	1200.15	606.606	138.786	1194.19	655.932	-5.06683	1180.77	644.614	204.036	1033.32	773.394	-99.3295	1019.36	730.369	72.3553	971.935	647.163	320.408	689.692	717.217	338.181	740.574	438.904	255.329	753.54	447.055	275.403	756.4	353.841	241.887	736.275	267.237	-207.304	663.236	702.361	-169.637	735.962	431.441	-88.6893	756.772	442.506	-102.205	764.66	343.802	-66.2177	734.231	257.812
538	5.37	69.2652	1200.18	606.51	138.782	1194.2	655.885	-5.0698	1180.8	644.567	204.034	1033.33	773.369	-99.3358	1019.37	730.351	72.3411	971.968	647.046	320.415	689.684	717.198	338.153	740.587	438.858	255.335	753.547	447.046	275.389	756.406	353.821	241.884	736.283	267.233	-207.325	663.281	702.418	-169.639	735.969	431.433	-88.7014	756.787	442.426	-102.21	764.674	343.796	-66.2423	734.243	257.739
539	5.38	69.2566	1200.16	606.547	138.779	1194.21	655.856	-5.09054	1180.8	644.573	204.029	1033.33	773.388	-99.3388	1019.37	730.348	72.3289	971.936	647.049	320.416	689.665	717.192	338.14	740.591	438.885	255.315	753.531	447.063	275.373	756.391	353.82	241.862	736.278	267.235	-207.375	663.336	702.523	-169.638	735.955	431.425	-88.7109	756.795	442.437	-102.221	764.67	343.836	-66.261	734.254	257.716
540	5.39	69.2374	1200.13	606.6	138.763	1194.2	655.889	-5.11208	1180.81	644.596	204.027	1033.32	773.402	-99.3478	1019.38	730.353	72.3089	971.873	647.192	320.448	689.663	717.206	338.122	740.591	438.922	255.282	753.505	447.058	275.376	756.374	353.857	241.839	736.26	267.271	-207.421	663.392	702.593	-169.658	735.942	431.447	-88.7233	756.785	442.475	-102.25	764.665	343.842	-66.2787	734.236	257.761
541	5.4	69.2276	1200.12	606.622	138.738	1194.2	655.88	-5.12166	1180.8	644.576	204.006	1033.32	773.396	-99.3629	1019.38	730.311	72.2667	971.871	647.166	320.478	689.648	717.206	338.088	740.589	438.892	255.256	753.493	447.066	275.375	756.361	353.875	241.825	736.251	267.289	-207.42	663.387	702.568	-169.682	735.922	431.455	-88.7352	756.761	442.492	-102.268	764.671	343.83	-66.3219	734.25	257.732
542	5.41	69.2251	1200.13	606.643	138.748	1194.2	655.872	-5.12457	1180.82	644.525	203.988	1033.33	773.394	-99.3593	1019.38	730.295	72.2544	971.872	647.144	320.481	689.625	717.183	338.1	740.601	438.888	255.252	753.511	447.064	275.382	756.368	353.885	241.827	736.265	267.308	-207.392	663.363	702.49	-169.687	735.936	431.425	-88.7532	756.763	442.482	-102.283	764.691	343.842	-66.3421	734.265	257.679
543	5.42	69.2495	1200.15	606.614	138.77	1194.21	655.855	-5.11665	1180.82	644.528	203.994	1033.33	773.388	-99.3429	1019.37	730.294	72.2844	971.873	647.149	320.47	689.609	717.176	338.128	740.615	438.903	255.271	753.536	447.039	275.394	756.376	353.898	241.85	736.284	267.318	-207.386	663.313	702.434	-169.677	735.95	431.43	-88.7494	756.772	442.502	-102.274	764.687	343.875	-66.3229	734.277	257.702
544	5.43	69.2864	1200.17	606.543	138.785	1194.21	655.842	-5.09579	1180.79	644.519	204.006	1033.31	773.38	-99.326	1019.36	730.28	72.3205	971.878	647.092	320.451	689.606	717.194	338.14	740.607	438.866	255.301	753.552	447.035	275.39	756.38	353.861	241.866	736.288	267.298	-207.36	663.243	702.371	-169.654	735.933	431.436	-88.7233	756.762	442.482	-102.239	764.666	343.839	-66.2859	734.285	257.718
545	5.44	69.2961	1200.16	606.443	138.808	1194.2	655.869	-5.06532	1180.76	644.514	204.035	1033.28	773.367	-99.3094	1019.33	730.276	72.364	971.869	647.086	320.406	689.61	717.199	338.161	740.597	438.867	255.318	753.554	447.036	275.39	756.387	353.824	241.887	736.274	267.271	-207.324	663.168	702.297	-169.631	735.924	431.451	-88.6992	756.74	442.474	-102.216	764.636	343.811	-66.2481	734.259	257.708
546	5.45	69.2972	1200.14	606.521	138.827	1194.19	655.931	-5.05061	1180.72	644.533	204.051	1033.28	773.383	-99.3085	1019.3	730.301	72.398	971.832	647.202	320.371	689.632	717.21	338.172	740.582	438.899	255.307	753.538	447.067	275.387	756.385	353.825	241.897	736.269	267.281	-207.311	663.118	702.211	-169.634	735.916	431.462	-88.6886	756.722	442.502	-102.209	764.615	343.826	-66.2266	734.229	257.76
547	5.46	69.2785	1200.12	606.642	138.801	1194.19	655.954	-5.06977	1180.7	644.601	204.037	1033.28	773.406	-99.328	1019.31	730.315	72.3829	971.792	647.314	320.347	689.661	717.234	338.153	740.584	438.921	255.302	753.525	447.106	275.378	756.388	353.839	241.886	736.259	267.282	-207.337	663.153	702.235	-169.664	735.937	431.494	-88.6973	756.713	442.537	-102.212	764.6	343.866	-66.2438	734.219	257.801
548	5.47	69.2599	1200.12	606.628	138.77	1194.2	655.929	-5.08971	1180.72	644.568	204.019	1033.29	773.388	-99.3478	1019.32	730.302	72.3446	971.802	647.252	320.349	689.679	717.245	338.123	740.592	438.886	255.291	753.515	447.091	275.368	756.398	353.819	241.857	736.265	267.254	-207.368	663.229	702.325	-169.67	735.944	431.504	-88.7049	756.747	442.502	-102.23	764.63	343.841	-66.263	734.233	257.786
549	5.48	69.267	1200.13	606.575	138.754	1194.21	655.905	-5.10449	1180.76	644.545	204.006	1033.3	773.368	-99.355	1019.33	730.257	72.3469	971.838	647.147	320.365	689.675	717.249	338.113	740.609	438.875	255.306	753.516	447.062	275.379	756.396	353.829	241.848	736.271	267.25	-207.403	663.293	702.425	-169.652	735.933	431.476	-88.7012	756.769	442.453	-102.231	764.661	343.798	-66.2755	734.247	257.767
550	5.49	69.2643	1200.14	606.554	138.735	1194.23	655.88	-5.11827	1180.79	644.524	204.005	1033.32	773.359	-99.3508	1019.33	730.253	72.3469	971.87	647.076	320.391	689.659	717.25	338.114	740.625	438.869	255.324	753.508	447.064	275.402	756.395	353.873	241.863	736.274	267.252	-207.409	663.319	702.485	-169.645	735.933	431.446	-88.7051	756.777	442.44	-102.229	764.689	343.796	-66.2948	734.264	257.727
551	5.5	69.247	1200.17	606.558	138.721	1194.24	655.855	-5.14227	1180.81	644.515	203.996	1033.34	773.37	-99.348	1019.32	730.268	72.3179	971.896	646.922	320.418	689.643	717.242	338.112	740.635	438.858	255.313	753.514	447.07	275.409	756.375	353.886	241.874	736.268	267.276	-207.441	663.354	702.561	-169.643	735.939	431.414	-88.7027	756.788	442.407	-102.247	764.702	343.78	-66.2929	734.286	257.683
552	5.51	69.2248	1200.2	606.562	138.708	1194.25	655.881	-5.16767	1180.81	644.543	204.002	1033.34	773.389	-99.3407	1019.31	730.282	72.3153	971.887	646.929	320.43	689.639	717.23	338.135	740.62	438.899	255.297	753.528	447.076	275.419	756.374	353.904	241.881	736.261	267.312	-207.402	663.307	702.502	-169.659	735.96	431.419	-88.7153	756.801	442.439	-102.25	764.712	343.792	-66.2704	734.278	257.713
553	5.52	69.1915	1200.21	606.612	138.72	1194.25	655.957	-5.17661	1180.8	644.599	204.018	1033.33	773.405	-99.3075	1019.28	730.325	72.3324	971.858	647.059	320.423	689.633	717.221	338.157	740.604	438.928	255.304	753.535	447.104	275.418	756.374	353.917	241.904	736.256	267.332	-207.36	663.267	702.479	-169.66	735.986	431.462	-88.7086	756.801	442.505	-102.233	764.704	343.843	-66.244	734.266	257.783
554	5.53	69.1699	1200.2	606.618	138.713	1194.24	655.948	-5.17182	1180.77	644.588	204.01	1033.32	773.41	-99.3098	1019.25	730.297	72.3345	971.843	647.075	320.393	689.617	717.18	338.174	740.588	438.931	255.308	753.531	447.086	275.41	756.378	353.875	241.907	736.257	267.311	-207.343	663.198	702.446	-169.652	735.977	431.473	-88.7096	756.798	442.475	-102.225	764.673	343.83	-66.2346	734.246	257.806
555	5.54	69.1702	1200.15	606.594	138.696	1194.23	655.895	-5.17574	1180.73	644.571	203.99	1033.29	773.388	-99.3347	1019.22	730.279	72.3325	971.825	647.028	320.345	689.628	717.186	338.163	740.573	438.892	255.324	753.505	447.059	275.399	756.378	353.835	241.884	736.254	267.251	-207.316	663.097	702.347	-169.644	735.937	431.468	-88.7039	756.755	442.451	-102.211	764.632	343.816	-66.2347	734.224	257.773
556	5.55	69.1358	1200.12	606.664	138.649	1194.23	655.896	-5.21559	1180.7	644.601	203.96	1033.28	773.375	-99.3709	1019.21	730.287	72.2981	971.802	647.048	320.311	689.664	717.228	338.107	740.587	438.85	255.301	753.485	447.064	275.36	756.374	353.811	241.846	736.261	267.226	-207.296	663.097	702.358	-169.657	735.89	431.45	-88.7146	756.717	442.465	-102.224	764.604	343.842	-66.2652	734.198	257.754
557	5.56	69.0476	1200.09	606.744	138.557	1194.24	655.874	-5.29425	1180.71	644.685	203.916	1033.3	773.39	-99.4122	1019.21	730.294	72.223	971.769	647.124	320.298	689.697	717.276	338.041	740.608	438.842	255.248	753.48	447.1	275.323	756.378	353.822	241.798	736.262	267.251	-207.26	663.092	702.348	-169.688	735.881	431.499	-88.7665	756.721	442.502	-102.288	764.62	343.881	-66.332	734.205	257.743
558	5.57	68.9989	1200.1	606.75	138.513	1194.25	655.874	-5.32962	1180.71	644.723	203.89	1033.32	773.388	-99.4315	1019.21	730.29	72.1736	971.743	647.194	320.325	689.705	717.258	338.034	740.615	438.842	255.207	753.483	447.123	275.318	756.367	353.824	241.777	736.267	267.26	-207.231	663.071	702.294	-169.707	735.885	431.499	-88.7979	756.737	442.51	-102.314	764.641	343.895	-66.3571	734.218	257.729
559	5.58	69.0079	1200.12	606.772	138.524	1194.25	655.9	-5.32184	1180.72	644.723	203.909	1033.31	773.401	-99.4066	1019.2	730.306	72.1918	971.752	647.194	320.35	689.699	717.232	338.079	740.619	438.879	255.223	753.495	447.096	275.341	756.366	353.831	241.802	736.268	267.264	-207.233	663.081	702.33	-169.687	735.906	431.455	-88.7581	756.753	442.497	-102.271	764.645	343.882	-66.3287	734.235	257.732
560	5.59	69.0346	1200.14	606.722	138.559	1194.26	655.942	-5.29733	1180.73	644.711	203.94	1033.32	773.423	-99.3671	1019.19	730.328	72.2317	971.783	647.156	320.381	689.688	717.247	338.132	740.622	438.92	255.263	753.523	447.089	275.381	756.374	353.865	241.852	736.253	267.288	-207.261	663.12	702.461	-169.641	735.935	431.454	-88.713	756.773	442.484	-102.242	764.659	343.868	-66.2836	734.258	257.718
561	5.6	69.0649	1200.16	606.639	138.587	1194.26	655.96	-5.27412	1180.72	644.669	203.962	1033.32	773.404	-99.3451	1019.17	730.33	72.2773	971.814	647.036	320.423	689.678	717.257	338.17	740.623	438.915	255.3	753.542	447.055	275.424	756.371	353.89	241.905	736.247	267.32	-207.256	663.129	702.507	-169.61	735.942	431.458	-88.6769	756.779	442.449	-102.203	764.672	343.848	-66.2449	734.272	257.698
562	5.61	69.0659	1200.18	606.617	138.596	1194.28	655.932	-5.27731	1180.73	644.65	203.962	1033.33	773.385	-99.3413	1019.16	730.306	72.3169	971.822	647.003	320.421	689.668	717.227	338.198	740.632	438.896	255.316	753.556	447.028	275.444	756.374	353.91	241.918	736.249	267.308	-207.247	663.093	702.461	-169.594	735.94	431.44	-88.6445	756.773	442.437	-102.202	764.666	343.832	-66.2262	734.281	257.697
563	5.62	69.0111	1200.19	606.691	138.547	1194.33	655.957	-5.33598	1180.75	644.695	203.925	1033.36	773.412	-99.3794	1019.17	730.302	72.2732	971.831	647.02	320.386	689.677	717.22	338.161	740.664	438.917	255.299	753.557	447.059	275.418	756.395	353.91	241.89	736.279	267.322	-207.252	663.07	702.425	-169.621	735.961	431.471	-88.6891	756.784	442.493	-102.232	764.676	343.869	-66.2611	734.307	257.711
564	5.63	68.9265	1200.17	606.74	138.442	1194.35	655.922	-5.41358	1180.76	644.734	203.868	1033.37	773.424	-99.439	1019.2	730.319	72.1813	971.818	647.077	320.338	689.702	717.243	338.096	740.693	438.917	255.254	753.543	447.12	275.365	756.407	353.876	241.84	736.298	267.297	-207.297	663.1	702.52	-169.667	735.946	431.524	-88.7484	756.776	442.544	-102.283	764.688	343.901	-66.3191	734.303	257.723
565	5.64	68.9087	1200.14	606.738	138.391	1194.33	655.863	-5.43705	1180.72	644.732	203.834	1033.37	773.391	-99.4666	1019.18	730.299	72.1658	971.759	647.131	320.287	689.719	717.244	338.057	740.702	438.85	255.259	753.51	447.118	275.325	756.407	353.815	241.816	736.313	267.24	-207.301	663.067	702.512	-169.68	735.896	431.51	-88.7498	756.746	442.519	-102.303	764.675	343.871	-66.3315	734.275	257.713
566	5.65	68.9287	1200.09	606.77	138.378	1194.32	655.85	-5.4157	1180.67	644.71	203.832	1033.34	773.339	-99.4707	1019.14	730.256	72.185	971.704	647.061	320.256	689.726	717.238	338.069	740.681	438.84	255.277	753.482	447.072	275.332	756.381	353.786	241.827	736.296	267.23	-207.32	663.026	702.48	-169.673	735.86	431.451	-88.724	756.714	442.508	-102.272	764.649	343.832	-66.3012	734.243	257.716
567	5.66	68.8992	1200.09	606.768	138.371	1194.32	655.87	-5.43438	1180.66	644.712	203.834	1033.32	773.328	-99.4758	1019.13	730.26	72.1835	971.708	647.054	320.252	689.728	717.251	338.082	740.66	438.875	255.269	753.485	447.07	275.343	756.364	353.79	241.836	736.275	267.247	-207.317	663.015	702.432	-169.682	735.876	431.457	-88.721	756.73	442.506	-102.262	764.641	343.832	-66.2994	734.23	257.748
568	5.67	68.8698	1200.11	606.736	138.375	1194.31	655.863	-5.44396	1180.69	644.679	203.839	1033.35	773.373	-99.4688	1019.14	730.281	72.152	971.753	647.043	320.279	689.736	717.268	338.095	740.656	438.901	255.26	753.508	447.078	275.342	756.367	353.833	241.833	736.268	267.268	-207.289	663.064	702.458	-169.67	735.922	431.47	-88.7348	756.773	442.497	-102.261	764.661	343.826	-66.2982	734.24	257.762
569	5.68	68.8693	1200.14	606.634	138.406	1194.32	655.878	-5.42	1180.71	644.627	203.854	1033.37	773.374	-99.4477	1019.12	730.263	72.1609	971.776	647.017	320.338	689.726	717.273	338.147	740.632	438.966	255.268	753.536	447.064	275.374	756.37	353.868	241.862	736.257	267.298	-207.281	663.092	702.48	-169.646	735.97	431.453	-88.7132	756.807	442.469	-102.242	764.679	343.811	-66.2636	734.232	257.773
570	5.69	68.8753	1200.13	606.595	138.428	1194.3	655.89	-5.39864	1180.69	644.581	203.872	1033.35	773.347	-99.4263	1019.08	730.237	72.1825	971.76	646.986	320.359	689.699	717.256	338.187	740.595	438.991	255.287	753.537	447.051	275.404	756.355	353.877	241.905	736.224	267.339	-207.321	663.121	702.566	-169.627	735.974	431.43	-88.6751	756.814	442.437	-102.217	764.682	343.79	-66.2305	734.208	257.787
571	5.7	68.8693	1200.08	606.579	138.411	1194.26	655.844	-5.4269	1180.65	644.559	203.86	1033.33	773.336	-99.43	1019.04	730.228	72.156	971.731	646.943	320.361	689.677	717.238	338.176	740.575	438.976	255.295	753.495	447.068	275.409	756.331	353.874	241.903	736.184	267.337	-207.315	663.084	702.581	-169.626	735.927	431.432	-88.681	756.778	442.428	-102.208	764.667	343.751	-66.2282	734.193	257.804
572	5.71	68.8149	1200.05	606.519	138.347	1194.23	655.786	-5.47902	1180.64	644.559	203.808	1033.33	773.339	-99.4756	1019.02	730.194	72.1016	971.699	646.929	320.356	689.674	717.239	338.136	740.589	438.942	255.276	753.464	447.075	275.384	756.321	353.86	241.875	736.193	267.318	-207.258	662.962	702.425	-169.653	735.886	431.436	-88.7114	756.751	442.409	-102.228	764.675	343.783	-66.278	734.194	257.753
573	5.72	68.7284	1200.04	606.505	138.286	1194.25	655.765	-5.534	1180.63	644.567	203.762	1033.35	773.329	-99.5411	1019.05	730.176	72.0267	971.708	646.95	320.328	689.697	717.244	338.083	740.635	438.905	255.223	753.456	447.111	275.348	756.336	353.857	241.827	736.229	267.319	-207.229	662.887	702.33	-169.689	735.869	431.456	-88.7698	756.743	442.448	-102.282	764.689	343.827	-66.3326	734.219	257.734
574	5.73	68.6805	1200.03	606.515	138.245	1194.27	655.744	-5.56735	1180.63	644.58	203.721	1033.36	773.343	-99.5967	1019.06	730.183	71.9917	971.699	647.055	320.285	689.729	717.248	338.028	740.682	438.903	255.185	753.462	447.154	275.329	756.359	353.869	241.791	736.249	267.305	-207.22	662.858	702.292	-169.716	735.867	431.493	-88.8131	756.742	442.546	-102.335	764.676	343.878	-66.3575	734.235	257.759
575	5.74	68.6884	1200.02	606.493	138.24	1194.27	655.735	-5.56135	1180.6	644.546	203.696	1033.37	773.336	-99.6029	1019.06	730.195	72.0097	971.693	647.041	320.234	689.76	717.262	338.018	740.692	438.885	255.196	753.474	447.134	275.325	756.378	353.855	241.794	736.269	267.27	-207.217	662.791	702.234	-169.713	735.868	431.495	-88.7973	756.736	442.569	-102.317	764.644	343.901	-66.3326	734.231	257.756
576	5.75	68.7492	1200	606.467	138.249	1194.26	655.702	-5.52676	1180.58	644.487	203.711	1033.36	773.314	-99.5828	1019.04	730.191	72.0858	971.678	647.077	320.189	689.779	717.286	338.06	740.678	438.877	255.249	753.493	447.093	275.352	756.399	353.833	241.825	736.285	267.226	-207.27	662.787	702.296	-169.659	735.866	431.445	-88.7278	756.737	442.496	-102.251	764.638	343.845	-66.2795	734.226	257.756
577	5.76	68.7827	1199.99	606.444	138.266	1194.25	655.71	-5.51694	1180.56	644.464	203.729	1033.37	773.307	-99.5652	1019.03	730.165	72.1151	971.674	647.067	320.19	689.792	717.312	338.095	740.672	438.883	255.267	753.514	447.062	275.379	756.406	353.827	241.859	736.285	267.247	-207.342	662.876	702.457	-169.62	735.895	431.433	-88.6964	756.759	442.48	-102.204	764.658	343.8	-66.2407	734.256	257.745
578	5.77	68.7646	1200	606.489	138.266	1194.26	655.728	-5.53499	1180.58	644.442	203.738	1033.41	773.326	-99.5516	1019.04	730.196	72.1119	971.696	647.119	320.213	689.798	717.304	338.103	740.677	438.905	255.257	753.531	447.069	275.385	756.408	353.85	241.869	736.282	267.278	-207.354	662.94	702.51	-169.638	735.935	431.484	-88.7052	756.781	442.531	-102.207	764.686	343.841	-66.2376	734.272	257.765
579	5.78	68.7248	1200	606.476	138.254	1194.25	655.726	-5.5538	1180.59	644.393	203.736	1033.42	773.342	-99.5426	1019.04	730.206	72.0781	971.723	647.013	320.239	689.801	717.298	338.107	740.682	438.948	255.225	753.542	447.073	275.384	756.396	353.875	241.879	736.276	267.302	-207.334	662.943	702.461	-169.662	735.957	431.482	-88.7184	756.799	442.546	-102.241	764.7	343.845	-66.2521	734.284	257.788
580	5.79	68.6966	1199.97	606.411	138.237	1194.23	655.691	-5.57986	1180.57	644.364	203.73	1033.4	773.314	-99.5437	1019.01	730.163	72.0542	971.688	646.949	320.248	689.804	717.298	338.122	740.667	438.946	255.217	753.524	447.075	275.381	756.379	353.855	241.883	736.259	267.296	-207.316	662.91	702.434	-169.667	735.942	431.452	-88.709	756.794	442.502	-102.244	764.696	343.834	-66.2768	734.277	257.756
581	5.8	68.6603	1199.94	606.367	138.22	1194.21	655.686	-5.60427	1180.54	644.351	203.726	1033.38	773.284	-99.5586	1018.97	730.132	72.0193	971.63	646.939	320.263	689.787	717.298	338.117	740.639	438.951	255.221	753.485	447.08	275.385	756.357	353.861	241.888	736.218	267.304	-207.334	662.933	702.538	-169.669	735.896	431.456	-88.708	756.768	442.465	-102.235	764.655	343.853	-66.2856	734.237	257.751
582	5.81	68.6141	1199.92	606.317	138.183	1194.2	655.624	-5.63437	1180.53	644.348	203.706	1033.38	773.261	-99.5897	1018.95	730.097	72.0071	971.622	646.885	320.265	689.787	717.299	338.092	740.645	438.914	255.229	753.462	447.086	275.39	756.353	353.883	241.866	736.211	267.304	-207.355	662.938	702.62	-169.677	735.856	431.458	-88.7043	756.745	442.471	-102.243	764.638	343.838	-66.3036	734.227	257.728
583	5.82	68.5509	1199.98	606.201	138.13	1194.23	655.571	-5.66792	1180.56	644.328	203.669	1033.4	773.233	-99.6261	1018.97	730.06	71.9492	971.655	646.769	320.233	689.789	717.279	338.048	740.688	438.861	255.235	753.479	447.092	275.362	756.367	353.84	241.827	736.254	267.261	-207.317	662.851	702.489	-169.681	735.853	431.45	-88.732	756.752	442.443	-102.278	764.654	343.827	-66.3313	734.273	257.68
584	5.83	68.4935	1200.03	606.165	138.058	1194.27	655.535	-5.7033	1180.58	644.343	203.633	1033.43	773.23	-99.6596	1018.99	730.055	71.9084	971.694	646.779	320.191	689.799	717.29	338.003	740.728	438.839	255.218	753.496	447.093	275.326	756.384	353.836	241.798	736.293	267.252	-207.284	662.794	702.385	-169.697	735.881	431.469	-88.7628	756.764	442.47	-102.316	764.684	343.821	-66.3534	734.306	257.671
585	5.84	68.4944	1200.03	606.197	138.063	1194.29	655.522	-5.71522	1180.58	644.339	203.614	1033.43	773.211	-99.6596	1018.98	730.061	71.9282	971.667	646.905	320.178	689.805	717.278	338.009	740.724	438.856	255.218	753.502	447.096	275.323	756.395	353.837	241.799	736.313	267.254	-207.26	662.755	702.367	-169.688	735.888	431.468	-88.7567	756.772	442.507	-102.3	764.691	343.826	-66.3231	734.283	257.739
586	5.85	68.5319	1200.02	606.131	138.104	1194.27	655.489	-5.6898	1180.54	644.269	203.643	1033.42	773.188	-99.6184	1018.95	730.044	71.9818	971.675	646.822	320.196	689.804	717.264	338.058	740.682	438.869	255.267	753.504	447.082	275.355	756.382	353.82	241.835	736.287	267.238	-207.253	662.724	702.358	-169.656	735.887	431.454	-88.7233	756.766	442.48	-102.262	764.696	343.806	-66.2738	734.248	257.744
587	5.86	68.5797	1199.98	606.172	138.142	1194.25	655.535	-5.66149	1180.52	644.234	203.681	1033.4	773.178	-99.5768	1018.92	730.027	72.0448	971.652	646.796	320.22	689.809	717.282	338.097	740.641	438.887	255.303	753.492	447.071	275.378	756.354	353.816	241.887	736.24	267.269	-207.25	662.735	702.384	-169.627	735.886	431.435	-88.6847	756.754	442.431	-102.209	764.669	343.785	-66.2329	734.203	257.767
588	5.87	68.5638	1199.94	606.273	138.13	1194.22	655.562	-5.67887	1180.5	644.281	203.687	1033.39	773.178	-99.567	1018.9	730.037	72.0229	971.576	646.959	320.234	689.804	717.306	338.114	740.611	438.949	255.284	753.47	447.104	275.381	756.333	353.861	241.892	736.21	267.322	-207.251	662.775	702.418	-169.648	735.891	431.46	-88.6927	756.74	442.473	-102.223	764.647	343.819	-66.2613	734.182	257.808
589	5.88	68.4982	1199.93	606.315	138.101	1194.22	655.566	-5.71001	1180.5	644.329	203.68	1033.4	773.18	-99.5832	1018.9	730.034	71.9803	971.558	647.012	320.275	689.798	717.299	338.112	740.604	438.987	255.239	753.459	447.121	275.375	756.326	353.89	241.87	736.197	267.361	-207.283	662.86	702.588	-169.674	735.892	431.508	-88.7339	756.753	442.526	-102.255	764.641	343.887	-66.2937	734.196	257.843
590	5.89	68.4649	1199.96	606.241	138.095	1194.23	655.508	-5.72216	1180.51	644.303	203.669	1033.4	773.153	-99.5995	1018.91	729.985	71.967	971.576	646.876	320.318	689.781	717.274	338.097	740.623	438.949	255.239	753.459	447.1	275.384	756.32	353.903	241.864	736.2	267.353	-207.326	662.932	702.76	-169.671	735.881	431.496	-88.7519	756.751	442.529	-102.268	764.657	343.902	-66.3063	734.213	257.819
591	5.9	68.4754	1199.97	606.194	138.101	1194.24	655.465	-5.72591	1180.52	644.247	203.659	1033.41	773.126	-99.6179	1018.93	729.955	71.9649	971.583	646.729	320.32	689.768	717.25	338.078	740.643	438.927	255.254	753.471	447.102	275.402	756.33	353.918	241.862	736.215	267.341	-207.306	662.875	702.668	-169.663	735.863	431.468	-88.7489	756.738	442.523	-102.277	764.686	343.839	-66.3145	734.235	257.755
592	5.91	68.5048	1199.98	606.14	138.098	1194.24	655.429	-5.70911	1180.53	644.208	203.648	1033.41	773.111	-99.647	1018.95	729.938	71.9819	971.599	646.715	320.295	689.765	717.264	338.081	740.663	438.928	255.277	753.479	447.109	275.405	756.352	353.904	241.861	736.249	267.333	-207.247	662.775	702.475	-169.652	735.86	431.484	-88.7431	756.727	442.523	-102.269	764.686	343.798	-66.3101	734.253	257.739
593	5.92	68.5323	1199.99	606.088	138.099	1194.25	655.381	-5.69089	1180.55	644.2	203.639	1033.41	773.095	-99.6591	1018.98	729.942	71.9727	971.605	646.685	320.251	689.787	717.3	338.081	740.68	438.88	255.274	753.504	447.091	275.39	756.373	353.853	241.864	736.277	267.314	-207.234	662.747	702.419	-169.646	735.879	431.466	-88.73	756.734	442.499	-102.266	764.679	343.795	-66.2916	734.279	257.709
594	5.93	68.5294	1200.01	606.047	138.103	1194.27	655.342	-5.6969	1180.56	644.192	203.625	1033.43	773.088	-99.6727	1019.01	729.966	71.9454	971.615	646.682	320.222	689.799	717.291	338.06	740.706	438.883	255.252	753.525	447.08	275.369	756.395	353.832	241.856	736.3	267.281	-207.206	662.672	702.305	-169.657	735.898	431.477	-88.7365	756.755	442.495	-102.277	764.683	343.814	-66.2835	734.287	257.72
595	5.94	68.5244	1199.99	606.064	138.093	1194.27	655.328	-5.70106	1180.56	644.194	203.605	1033.44	773.092	-99.7012	1019.01	729.96	71.9314	971.625	646.731	320.186	689.833	717.279	338.04	740.721	438.877	255.226	753.529	447.088	275.351	756.408	353.83	241.839	736.323	267.235	-207.214	662.648	702.261	-169.671	735.919	431.503	-88.7455	756.756	442.532	-102.297	764.69	343.87	-66.283	734.293	257.749
596	5.95	68.5471	1199.94	606.038	138.105	1194.25	655.329	-5.6851	1180.55	644.16	203.601	1033.43	773.085	-99.7121	1019	729.957	71.9322	971.593	646.738	320.153	689.866	717.304	338.056	740.706	438.869	255.226	753.511	447.079	275.345	756.406	353.822	241.833	736.301	267.218	-207.261	662.698	702.334	-169.667	735.906	431.475	-88.732	756.759	442.512	-102.272	764.669	343.88	-66.294	734.269	257.767
597	5.96	68.5821	1199.9	606.003	138.127	1194.2	655.329	-5.65896	1180.52	644.1	203.61	1033.42	773.065	-99.7084	1018.97	729.949	71.9494	971.553	646.726	320.156	689.887	717.332	338.076	740.654	438.86	255.229	753.486	447.042	275.348	756.378	353.8	241.851	736.253	267.216	-207.302	662.786	702.448	-169.651	735.881	431.43	-88.6976	756.748	442.464	-102.238	764.655	343.829	-66.2818	734.224	257.757
598	5.97	68.5966	1199.85	606.086	138.136	1194.16	655.365	-5.66117	1180.51	644.1	203.604	1033.42	773.073	-99.7085	1018.93	729.929	71.9191	971.529	646.724	320.181	689.865	717.318	338.076	740.628	438.868	255.214	753.456	447.056	275.357	756.337	353.797	241.864	736.221	267.244	-207.352	662.868	702.591	-169.674	735.861	431.431	-88.7103	756.728	442.467	-102.234	764.637	343.841	-66.2903	734.226	257.742
599	5.98	68.5408	1199.87	606.084	138.117	1194.16	655.399	-5.69609	1180.52	644.146	203.582	1033.43	773.112	-99.7188	1018.93	729.943	71.8625	971.535	646.739	320.21	689.841	717.306	338.066	740.638	438.928	255.182	753.458	447.1	275.359	756.32	353.83	241.866	736.21	267.287	-207.341	662.856	702.539	-169.703	735.87	431.446	-88.746	756.75	442.473	-102.274	764.651	343.883	-66.3287	734.241	257.732
600	5.99	68.4982	1199.93	606.021	138.114	1194.19	655.417	-5.71075	1180.54	644.126	203.575	1033.45	773.144	-99.716	1018.95	729.966	71.8682	971.578	646.738	320.24	689.838	717.306	338.05	740.684	438.932	255.173	753.478	447.104	275.363	756.333	353.859	241.86	736.23	267.308	-207.304	662.827	702.471	-169.706	735.901	431.463	-88.7728	756.773	442.49	-102.296	764.69	343.884	-66.3296	734.261	257.724
601	6	68.5345	1199.95	606.008	138.125	1194.21	655.418	-5.7044	1180.56	644.074	203.592	1033.47	773.166	-99.708	1018.97	729.948	71.9206	971.612	646.718	320.235	689.827	717.27	338.068	740.695	438.928	255.215	753.498	447.103	275.379	756.352	353.875	241.867	736.252	267.295	-207.298	662.786	702.393	-169.675	735.918	431.479	-88.7711	756.779	442.477	-102.278	764.704	343.86	-66.3018	734.273	257.719
602	6.01	68.5876	1199.97	606.002	138.13	1194.22	655.448	-5.68731	1180.55	644.063	203.599	1033.47	773.185	-99.6993	1018.95	729.965	71.9369	971.653	646.645	320.204	689.823	717.272	338.087	740.695	438.93	255.26	753.502	447.103	275.395	756.372	353.89	241.884	736.254	267.285	-207.273	662.696	702.275	-169.655	735.913	431.482	-88.7405	756.795	442.45	-102.26	764.705	343.844	-66.2694	734.271	257.732
603	6.02	68.6142	1199.97	606.003	138.121	1194.24	655.476	-5.68083	1180.54	644.08	203.596	1033.46	773.182	-99.7036	1018.95	729.984	71.9528	971.681	646.581	320.153	689.845	717.316	338.081	740.706	438.914	255.28	753.505	447.09	275.396	756.385	353.884	241.889	736.262	267.275	-207.312	662.718	702.363	-169.628	735.915	431.457	-88.7222	756.782	442.439	-102.251	764.716	343.828	-66.247	734.272	257.755
604	6.03	68.5721	1199.97	606.029	138.092	1194.26	655.484	-5.70232	1180.54	644.132	203.572	1033.46	773.212	-99.7266	1018.95	729.987	71.9596	971.667	646.688	320.122	689.874	717.353	338.059	740.723	438.897	255.257	753.509	447.09	275.375	756.397	353.856	241.874	736.285	267.248	-207.35	662.752	702.475	-169.649	735.918	431.471	-88.7262	756.767	442.482	-102.266	764.703	343.857	-66.2518	734.27	257.774
605	6.04	68.5211	1199.95	606.153	138.051	1194.24	655.512	-5.73618	1180.52	644.186	203.561	1033.45	773.237	-99.7546	1018.94	730.026	71.9222	971.606	646.817	320.101	689.903	717.351	338.041	740.722	438.921	255.227	753.487	447.121	275.355	756.397	353.846	241.855	736.284	267.25	-207.361	662.723	702.423	-169.681	735.902	431.496	-88.7416	756.75	442.535	-102.282	764.679	343.879	-66.2746	734.251	257.797
606	6.05	68.5151	1199.9	606.239	138.018	1194.22	655.543	-5.74851	1180.5	644.255	203.56	1033.44	773.254	-99.7592	1018.9	730.036	71.9101	971.553	646.89	320.108	689.892	717.325	338.037	740.701	438.928	255.212	753.453	447.128	275.349	756.378	353.811	241.845	736.256	267.259	-207.355	662.717	702.407	-169.694	735.883	431.489	-88.7534	756.731	442.543	-102.291	764.651	343.888	-66.2744	734.218	257.827
607	6.06	68.5134	1199.87	606.333	138.029	1194.22	655.596	-5.75409	1180.5	644.276	203.573	1033.41	773.268	-99.7517	1018.87	730.064	71.95	971.495	646.996	320.147	689.878	717.319	338.074	740.659	438.933	255.221	753.444	447.109	275.356	756.349	353.82	241.856	736.227	267.267	-207.358	662.755	702.466	-169.689	735.871	431.458	-88.7368	756.717	442.514	-102.266	764.642	343.861	-66.273	734.206	257.81
608	6.07	68.5002	1199.88	606.377	138.023	1194.21	655.649	-5.76184	1180.5	644.291	203.579	1033.4	773.269	-99.7292	1018.86	730.106	71.9515	971.491	646.992	320.177	689.865	717.312	338.099	740.632	438.954	255.216	753.441	447.102	275.368	756.328	353.84	241.863	736.209	267.285	-207.375	662.791	702.554	-169.675	735.862	431.442	-88.7271	756.713	442.51	-102.244	764.653	343.851	-66.2636	734.194	257.796
609	6.08	68.4732	1199.93	606.402	138.02	1194.22	655.708	-5.77095	1180.54	644.344	203.579	1033.42	773.305	-99.7282	1018.88	730.122	71.914	971.546	646.989	320.214	689.851	717.316	338.098	740.662	438.975	255.201	753.468	447.116	275.365	756.341	353.853	241.865	736.213	267.323	-207.344	662.784	702.579	-169.67	735.884	431.479	-88.7403	756.736	442.513	-102.248	764.68	343.851	-66.2797	734.23	257.775
610	6.09	68.4362	1200.01	606.36	138.011	1194.27	655.744	-5.79198	1180.58	644.41	203.587	1033.47	773.348	-99.7352	1018.92	730.14	71.9083	971.633	646.982	320.245	689.862	717.326	338.085	740.708	438.978	255.2	753.506	447.089	275.372	756.364	353.892	241.863	736.254	267.347	-207.268	662.736	702.481	-169.673	735.924	431.508	-88.7449	756.777	442.516	-102.254	764.704	343.857	-66.3021	734.288	257.751
611	6.1	68.4467	1200.09	606.343	137.999	1194.32	655.763	-5.79514	1180.61	644.426	203.595	1033.49	773.343	-99.7233	1018.95	730.149	71.9356	971.692	646.929	320.234	689.885	717.313	338.067	740.755	438.92	255.216	753.543	447.08	275.384	756.401	353.881	241.866	736.302	267.328	-207.218	662.708	702.433	-169.651	735.951	431.503	-88.7152	756.8	442.503	-102.257	764.713	343.86	-66.2916	734.338	257.72
612	6.11	68.4601	1200.12	606.378	137.982	1194.35	655.768	-5.80028	1180.63	644.458	203.591	1033.5	773.34	-99.7343	1018.96	730.15	71.942	971.704	646.888	320.186	689.905	717.326	338.056	740.781	438.881	255.236	753.544	447.093	275.382	756.423	353.847	241.865	736.322	267.277	-207.2	662.704	702.443	-169.63	735.944	431.474	-88.6945	756.804	442.46	-102.241	764.719	343.841	-66.2904	734.351	257.699
613	6.12	68.4458	1200.12	606.409	137.945	1194.35	655.77	-5.80262	1180.63	644.495	203.575	1033.48	773.355	-99.7622	1018.94	730.148	71.9524	971.674	646.956	320.126	689.933	717.337	338.033	740.761	438.877	255.248	753.526	447.083	275.36	756.42	353.831	241.843	736.321	267.233	-207.218	662.712	702.482	-169.628	735.919	431.46	-88.6899	756.796	442.452	-102.235	764.715	343.814	-66.2993	734.325	257.708
614	6.13	68.4091	1200.1	606.448	137.921	1194.35	655.799	-5.82047	1180.62	644.539	203.559	1033.47	773.351	-99.7801	1018.92	730.17	71.9271	971.644	646.95	320.094	689.938	717.341	338.027	740.739	438.88	255.227	753.504	447.081	275.331	756.403	353.802	241.831	736.294	267.218	-207.27	662.795	702.623	-169.656	735.909	431.449	-88.7054	756.774	442.451	-102.245	764.697	343.818	-66.3164	734.283	257.721
615	6.14	68.3847	1200.08	606.589	137.919	1194.36	655.884	-5.84693	1180.64	644.591	203.543	1033.47	773.341	-99.7897	1018.92	730.194	71.9021	971.613	647.047	320.088	689.946	717.332	338.013	740.725	438.866	255.202	753.477	447.089	275.332	756.372	353.815	241.822	736.263	267.244	-207.287	662.84	702.656	-169.686	735.904	431.447	-88.7335	756.758	442.46	-102.279	764.672	343.823	-66.3152	734.235	257.771
616	6.15	68.3802	1200.07	606.742	137.927	1194.35	655.955	-5.86078	1180.65	644.643	203.551	1033.46	773.378	-99.7682	1018.91	730.229	71.8961	971.607	647.167	320.123	689.93	717.3	338.028	740.705	438.915	255.185	753.451	447.116	275.334	756.354	353.839	241.824	736.235	267.277	-207.306	662.873	702.699	-169.694	735.908	431.45	-88.7485	756.75	442.514	-102.288	764.682	343.821	-66.3149	734.206	257.815
617	6.16	68.4132	1200.1	606.771	137.957	1194.34	656.023	-5.84897	1180.66	644.695	203.584	1033.45	773.394	-99.7195	1018.88	730.236	71.9191	971.623	647.183	320.177	689.899	717.28	338.063	740.681	438.948	255.193	753.451	447.13	275.357	756.349	353.853	241.855	736.219	267.298	-207.288	662.876	702.676	-169.68	735.919	431.468	-88.7326	756.755	442.523	-102.262	764.682	343.821	-66.3038	734.194	257.845
618	6.17	68.4351	1200.15	606.672	138.01	1194.35	656.07	-5.81521	1180.69	644.685	203.619	1033.44	773.381	-99.6731	1018.86	730.228	71.94	971.682	647.076	320.22	689.866	717.295	338.094	740.664	438.961	255.226	753.471	447.087	275.396	756.345	353.874	241.902	736.212	267.348	-207.27	662.873	702.662	-169.649	735.935	431.458	-88.702	756.787	442.484	-102.239	764.697	343.805	-66.2931	734.211	257.788
619	6.18	68.4662	1200.21	606.651	138.042	1194.36	656.134	-5.78243	1180.71	644.69	203.638	1033.44	773.41	-99.6482	1018.88	730.258	71.9601	971.719	647.037	320.226	689.839	717.317	338.128	740.657	438.999	255.261	753.496	447.066	275.418	756.345	353.904	241.925	736.218	267.354	-207.246	662.813	702.587	-169.629	735.943	431.44	-88.6801	756.792	442.434	-102.231	764.708	343.79	-66.2564	734.24	257.764
620	6.19	68.4893	1200.25	606.759	138.052	1194.39	656.167	-5.78019	1180.72	644.739	203.638	1033.45	773.423	-99.6363	1018.9	730.283	71.986	971.732	647.087	320.229	689.827	717.304	338.125	740.667	439.009	255.259	753.505	447.087	275.426	756.357	353.935	241.921	736.233	267.345	-207.221	662.75	702.498	-169.63	735.961	431.478	-88.6884	756.802	442.449	-102.239	764.706	343.826	-66.2451	734.264	257.78
621	6.2	68.4825	1200.28	606.765	138.04	1194.44	656.155	-5.78769	1180.73	644.793	203.625	1033.45	773.43	-99.644	1018.93	730.263	71.9781	971.731	647.049	320.216	689.841	717.305	338.088	740.697	438.964	255.239	753.49	447.112	275.409	756.373	353.904	241.895	736.251	267.326	-207.199	662.716	702.382	-169.639	735.955	431.489	-88.7138	756.8	442.513	-102.254	764.699	343.833	-66.2575	734.278	257.797
622	6.21	68.4904	1200.29	606.737	138.013	1194.46	656.141	-5.77968	1180.73	644.788	203.623	1033.44	773.429	-99.6639	1018.93	730.228	71.9625	971.73	647.031	320.177	689.869	717.324	338.04	740.733	438.905	255.244	753.474	447.112	275.375	756.385	353.85	241.855	736.274	267.287	-207.201	662.721	702.376	-169.652	735.944	431.484	-88.7306	756.789	442.536	-102.261	764.696	343.805	-66.2831	734.272	257.766
623	6.22	68.5035	1200.27	606.817	138.005	1194.46	656.142	-5.77025	1180.72	644.791	203.6	1033.42	773.434	-99.6947	1018.94	730.23	71.9717	971.692	647.122	320.14	689.87	717.341	338.011	740.748	438.877	255.24	753.468	447.115	275.358	756.381	353.836	241.824	736.282	267.247	-207.217	662.722	702.389	-169.665	735.911	431.467	-88.7341	756.769	442.512	-102.257	764.692	343.777	-66.3093	734.272	257.743
624	6.23	68.5102	1200.22	606.893	138.004	1194.44	656.151	-5.76803	1180.71	644.813	203.579	1033.4	773.428	-99.7169	1018.94	730.246	71.9396	971.676	647.141	320.107	689.869	717.345	337.994	740.742	438.872	255.222	753.451	447.128	275.342	756.372	353.845	241.803	736.279	267.227	-207.229	662.71	702.372	-169.685	735.881	431.46	-88.7557	756.741	442.52	-102.279	764.668	343.795	-66.3358	734.262	257.724
625	6.24	68.5202	1200.21	606.935	138.008	1194.43	656.163	-5.76828	1180.72	644.845	203.593	1033.4	773.432	-99.7052	1018.94	730.24	71.9263	971.659	647.137	320.102	689.865	717.333	337.99	740.738	438.881	255.187	753.452	447.124	275.328	756.373	353.83	241.811	736.267	267.247	-207.279	662.784	702.508	-169.69	735.894	431.494	-88.7595	756.741	442.532	-102.285	764.661	343.849	-66.3513	734.256	257.716
626	6.25	68.5487	1200.23	606.912	138.052	1194.43	656.135	-5.73886	1180.75	644.844	203.625	1033.39	773.442	-99.679	1018.95	730.263	71.9473	971.676	647.145	320.122	689.837	717.32	338.013	740.736	438.89	255.176	753.486	447.108	275.345	756.379	353.843	241.835	736.264	267.265	-207.335	662.872	702.621	-169.682	735.943	431.519	-88.7526	756.779	442.541	-102.283	764.693	343.853	-66.3435	734.277	257.713
627	6.26	68.598	1200.24	606.874	138.138	1194.41	656.158	-5.69565	1180.77	644.834	203.666	1033.4	773.431	-99.632	1018.95	730.242	72.0009	971.688	647.144	320.157	689.821	717.326	338.069	740.71	438.933	255.188	753.519	447.096	275.366	756.38	353.852	241.873	736.253	267.296	-207.339	662.889	702.589	-169.658	735.97	431.481	-88.7363	756.796	442.546	-102.259	764.699	343.833	-66.3047	734.267	257.755
628	6.27	68.6672	1200.24	606.805	138.208	1194.4	656.137	-5.62788	1180.78	644.762	203.702	1033.4	773.421	-99.5881	1018.95	730.223	72.0571	971.705	647.134	320.181	689.807	717.3	338.12	740.685	438.954	255.217	753.546	447.069	275.393	756.374	353.853	241.908	736.253	267.322	-207.319	662.87	702.504	-169.626	735.998	431.43	-88.695	756.803	442.492	-102.228	764.684	343.809	-66.2768	734.278	257.766
629	6.28	68.725	1200.25	606.744	138.238	1194.39	656.113	-5.58866	1180.78	644.689	203.703	1033.39	773.403	-99.5756	1018.95	730.213	72.0843	971.72	647.089	320.18	689.804	717.316	338.13	740.677	438.969	255.245	753.538	447.054	275.41	756.374	353.869	241.914	736.243	267.32	-207.34	662.92	702.614	-169.624	735.985	431.382	-88.6677	756.808	442.473	-102.22	764.688	343.784	-66.2654	734.276	257.737
630	6.29	68.7206	1200.24	606.762	138.216	1194.36	656.073	-5.60644	1180.78	644.679	203.682	1033.4	773.39	-99.6011	1018.96	730.205	72.0378	971.7	647.061	320.149	689.806	717.315	338.088	740.684	438.941	255.232	753.508	447.045	275.399	756.369	353.871	241.889	736.236	267.294	-207.379	662.978	702.708	-169.646	735.957	431.387	-88.6758	756.797	442.468	-102.232	764.697	343.782	-66.2875	734.277	257.712
631	6.3	68.6753	1200.22	606.771	138.182	1194.36	656.035	-5.63026	1180.77	644.676	203.649	1033.4	773.371	-99.6428	1018.96	730.181	71.9883	971.653	647.053	320.092	689.808	717.312	338.028	740.715	438.926	255.189	753.49	447.079	275.358	756.368	353.851	241.835	736.247	267.264	-207.348	662.939	702.603	-169.671	735.922	431.438	-88.7108	756.776	442.498	-102.286	764.698	343.788	-66.3298	734.259	257.728
632	6.31	68.667	1200.21	606.778	138.162	1194.36	655.985	-5.63	1180.75	644.668	203.634	1033.41	773.398	-99.6704	1018.97	730.15	71.9882	971.634	647.176	320.05	689.827	717.31	337.995	740.73	438.936	255.158	753.468	447.112	275.32	756.376	353.841	241.792	736.272	267.256	-207.339	662.916	702.558	-169.7	735.912	431.457	-88.742	756.766	442.522	-102.312	764.69	343.797	-66.3607	734.251	257.736
633	6.32	68.6966	1200.17	606.737	138.179	1194.38	655.935	-5.60915	1180.73	644.628	203.651	1033.42	773.396	-99.667	1018.99	730.152	71.9963	971.64	647.164	320.038	689.842	717.306	337.996	740.736	438.924	255.173	753.45	447.097	275.314	756.383	353.811	241.794	736.284	267.228	-207.314	662.877	702.51	-169.7	735.919	431.464	-88.7431	756.758	442.501	-102.302	764.684	343.828	-66.341	734.231	257.764
634	6.33	68.7361	1200.17	606.659	138.21	1194.36	655.882	-5.57282	1180.73	644.576	203.669	1033.41	773.387	-99.6477	1019	730.178	72.0463	971.669	647.101	320.04	689.829	717.316	338.019	740.74	438.906	255.21	753.461	447.094	275.334	756.385	353.804	241.84	736.286	267.247	-207.285	662.857	702.482	-169.665	735.927	431.461	-88.7094	756.771	442.489	-102.281	764.694	343.809	-66.3008	734.242	257.762
635	6.34	68.8024	1200.18	606.59	138.276	1194.35	655.887	-5.52081	1180.72	644.514	203.693	1033.4	773.382	-99.6091	1018.99	730.175	72.0726	971.714	647.034	320.061	689.81	717.344	338.065	740.716	438.933	255.245	753.485	447.095	275.37	756.383	353.837	241.874	736.283	267.271	-207.274	662.842	702.439	-169.644	735.943	431.464	-88.6801	756.795	442.473	-102.233	764.677	343.823	-66.2673	734.246	257.781
636	6.35	68.841	1200.17	606.571	138.326	1194.33	655.905	-5.48949	1180.72	644.512	203.717	1033.39	773.41	-99.561	1018.97	730.199	72.0731	971.731	646.997	320.104	689.779	717.345	338.099	740.693	439.001	255.238	753.497	447.087	275.402	756.378	353.886	241.901	736.258	267.32	-207.261	662.833	702.429	-169.624	735.96	431.473	-88.6699	756.805	442.464	-102.21	764.668	343.83	-66.2355	734.232	257.803
637	6.36	68.8355	1200.14	606.579	138.347	1194.31	655.927	-5.49028	1180.71	644.542	203.733	1033.39	773.417	-99.5407	1018.95	730.199	72.0686	971.702	647.054	320.156	689.738	717.313	338.114	740.69	439.014	255.227	753.504	447.109	275.421	756.371	353.91	241.911	736.238	267.356	-207.279	662.862	702.516	-169.621	735.962	431.488	-88.6925	756.806	442.498	-102.23	764.662	343.862	-66.2528	734.231	257.778
638	6.37	68.8102	1200.11	606.579	138.33	1194.28	655.864	-5.50859	1180.7	644.535	203.719	1033.38	773.399	-99.5456	1018.93	730.177	72.0259	971.669	647.013	320.19	689.71	717.28	338.1	740.675	438.992	255.226	753.482	447.139	275.404	756.348	353.9	241.885	736.213	267.356	-207.311	662.89	702.566	-169.641	735.942	431.488	-88.7304	756.787	442.513	-102.263	764.657	343.863	-66.2902	734.231	257.779
639	6.38	68.7766	1200.07	606.574	138.316	1194.26	655.808	-5.52347	1180.67	644.51	203.709	1033.35	773.374	-99.5607	1018.91	730.145	72.0155	971.628	647.013	320.195	689.707	717.288	338.082	740.674	438.992	255.224	753.449	447.138	275.395	756.334	353.892	241.871	736.193	267.362	-207.275	662.831	702.479	-169.667	735.924	431.5	-88.7406	756.754	442.514	-102.278	764.653	343.833	-66.3109	734.219	257.784
640	6.39	68.7609	1200.05	606.518	138.285	1194.23	655.774	-5.53786	1180.65	644.494	203.7	1033.34	773.345	-99.5777	1018.9	730.132	72.0185	971.574	647.055	320.174	689.708	717.289	338.06	740.673	438.95	255.21	753.432	447.116	275.378	756.333	353.873	241.848	736.186	267.343	-207.257	662.784	702.444	-169.688	735.893	431.497	-88.7392	756.743	442.512	-102.28	764.643	343.814	-66.3334	734.201	257.766
641	6.4	68.7529	1200.05	606.546	138.263	1194.24	655.727	-5.54663	1180.64	644.473	203.693	1033.36	773.335	-99.591	1018.91	730.137	72.0186	971.559	647.069	320.139	689.729	717.272	338.029	740.679	438.912	255.185	753.423	447.111	275.362	756.338	353.859	241.825	736.208	267.296	-207.26	662.77	702.437	-169.695	735.873	431.472	-88.7564	756.729	442.528	-102.302	764.642	343.808	-66.3432	734.203	257.75
642	6.41	68.7456	1200.07	606.548	138.25	1194.27	655.717	-5.5351	1180.66	644.454	203.681	1033.39	773.325	-99.6059	1018.94	730.136	72.0229	971.603	647.024	320.105	689.765	717.271	338.009	740.72	438.89	255.186	753.447	447.124	275.343	756.372	353.852	241.822	736.254	267.262	-207.29	662.81	702.491	-169.689	735.907	431.479	-88.7616	756.751	442.524	-102.314	764.665	343.837	-66.3458	734.247	257.729
643	6.42	68.7807	1200.12	606.446	138.271	1194.31	655.709	-5.52807	1180.69	644.402	203.685	1033.42	773.313	-99.6016	1018.98	730.122	72.0662	971.663	646.959	320.081	689.801	717.291	338.022	740.749	438.883	255.199	753.492	447.128	275.336	756.405	353.829	241.839	736.3	267.249	-207.31	662.835	702.526	-169.657	735.95	431.485	-88.7418	756.789	442.505	-102.284	764.697	343.817	-66.3079	734.281	257.752
644	6.43	68.8146	1200.16	606.356	138.297	1194.33	655.671	-5.51392	1180.71	644.358	203.697	1033.44	773.297	-99.588	1019	730.098	72.0893	971.717	646.831	320.082	689.833	717.322	338.052	740.754	438.88	255.228	753.525	447.094	275.353	756.421	353.804	241.864	736.318	267.232	-207.321	662.888	702.602	-169.627	735.981	431.427	-88.7039	756.821	442.471	-102.248	764.704	343.757	-66.2744	734.297	257.74
645	6.44	68.834	1200.15	606.356	138.311	1194.32	655.667	-5.49996	1180.7	644.331	203.727	1033.45	773.301	-99.5662	1018.99	730.088	72.1212	971.744	646.82	320.102	689.823	717.335	338.075	740.746	438.877	255.257	753.527	447.066	275.377	756.423	353.83	241.886	736.304	267.232	-207.321	662.937	702.628	-169.613	735.991	431.395	-88.681	756.821	442.462	-102.229	764.711	343.745	-66.2568	734.305	257.706
646	6.45	68.8193	1200.11	606.392	138.31	1194.29	655.694	-5.51291	1180.67	644.314	203.743	1033.42	773.294	-99.5521	1018.96	730.084	72.1213	971.689	646.942	320.142	689.796	717.309	338.106	740.726	438.885	255.256	753.498	447.07	275.382	756.405	353.847	241.894	736.268	267.277	-207.336	662.971	702.696	-169.624	735.972	431.392	-88.6736	756.809	442.457	-102.223	764.709	343.764	-66.264	734.279	257.713
647	6.46	68.7759	1200.03	606.431	138.293	1194.24	655.708	-5.5395	1180.63	644.349	203.739	1033.4	773.284	-99.5542	1018.92	730.07	72.0835	971.589	647.041	320.174	689.745	717.29	338.104	740.671	438.927	255.218	753.452	447.116	275.379	756.354	353.829	241.881	736.217	267.321	-207.312	662.956	702.663	-169.649	735.941	431.417	-88.701	756.77	442.467	-102.25	764.695	343.819	-66.3012	734.24	257.734
[truncated: 3 more columns]

## Sheet: Trial01
PathFileType	4	(X/Y/Z)	Trial01.trc
DataRate	CameraRate	NumFrames	NumMarkers	Units	OrigDataRate	OrigDataStartFrame	OrigNumFrames
100	100	820	16	mm	100	1	820
Frame#	Time	nasion			r zyg pr			l zyg pr			r should			l should			sternum			r elbow			r ulna			r radius			r hand			r finger			l elbow			l ulna			l radius			l hand			l finger
		X1	Y1	Z1	X2	Y2	Z2	X3	Y3	Z3	X4	Y4	Z4	X5	Y5	Z5	X6	Y6	Z6	X7	Y7	Z7	X8	Y8	Z8	X9	Y9	Z9	X10	Y10	Z10	X11	Y11	Z11	X12	Y12	Z12	X13	Y13	Z13	X14	Y14	Z14	X15	Y15	Z15	X16	Y16	Z16
1	0	83.1214	1172.61	584.712	147.919	1176.7	638.784	6.02028	1163.23	619.375	210.226	1029.79	760.138	-92.5608	1023.8	737.967	73.7629	966.228	642.038	347.193	691.387	717.245	339.344	742.696	439.104	256.747	751.37	453.4	270.4	756.552	358.468	246.36	736.755	271.901	-223.066	680.91	689.484	-161.719	740.319	421.708	-80.0861	754.812	436.646	-88.8521	762.99	340.534	-54.52	733.548	255.92
2	0.01	83.1227	1172.54	584.615	147.926	1176.64	638.731	6.01531	1163.19	619.367	210.227	1029.78	760.1	-92.5672	1023.77	737.921	73.7793	966.156	642.086	347.195	691.386	717.229	339.358	742.689	439.051	256.777	751.33	453.361	270.403	756.546	358.439	246.377	736.76	271.877	-223.102	680.888	689.476	-161.699	740.302	421.724	-80.064	754.798	436.67	-88.8164	762.951	340.598	-54.5107	733.532	255.882
3	0.02	83.1191	1172.52	584.578	147.89	1176.63	638.643	5.97075	1163.19	619.335	210.21	1029.79	760.085	-92.5905	1023.76	737.882	73.7605	966.164	642.049	347.193	691.394	717.238	339.345	742.69	439.016	256.85	751.189	453.45	270.373	756.562	358.402	246.354	736.789	271.855	-223.131	680.853	689.47	-161.715	740.297	421.709	-80.0998	754.79	436.654	-88.835	762.985	340.539	-54.5145	733.494	255.938
4	0.03	83.078	1172.54	584.562	147.824	1176.65	638.57	5.87563	1163.26	619.262	210.161	1029.8	760.087	-92.636	1023.79	737.868	73.6798	966.246	641.949	347.19	691.415	717.272	339.287	742.719	439.01	256.97	750.875	453.672	270.313	756.584	358.377	246.316	736.816	271.863	-223.134	680.81	689.444	-161.756	740.319	421.726	-80.1571	754.797	436.659	-88.9084	763.076	340.447	-54.5576	733.449	256.086
5	0.04	83.0166	1172.57	584.482	147.774	1176.69	638.539	5.80089	1163.32	619.161	210.118	1029.82	760.052	-92.6779	1023.84	737.875	73.5931	966.364	641.814	347.192	691.402	717.251	339.229	742.752	438.99	256.993	750.794	453.741	270.266	756.612	358.374	246.281	736.849	271.857	-223.127	680.8	689.446	-161.798	740.347	421.747	-80.2129	754.837	436.656	-88.9715	763.18	340.303	-54.6284	733.513	256.05
6	0.05	82.9861	1172.59	584.398	147.749	1176.72	638.505	5.77421	1163.35	619.083	210.103	1029.84	760.038	-92.6943	1023.86	737.866	73.555	966.465	641.677	347.203	691.397	717.235	339.209	742.782	438.957	256.98	750.804	453.686	270.255	756.641	358.37	246.259	736.869	271.828	-223.106	680.797	689.458	-161.815	740.354	421.757	-80.2356	754.868	436.651	-89	763.273	340.189	-54.6629	733.629	255.909
7	0.06	82.9786	1172.6	584.34	147.754	1176.71	638.47	5.77307	1163.35	619.041	210.114	1029.84	760.023	-92.6857	1023.86	737.859	73.5418	966.466	641.678	347.22	691.395	717.237	339.224	742.787	438.958	256.983	750.814	453.7	270.263	756.644	358.379	246.257	736.871	271.844	-223.08	680.82	689.504	-161.806	740.354	421.757	-80.2149	754.888	436.634	-88.9912	763.291	340.183	-54.6538	733.625	255.945
8	0.07	83.0008	1172.56	584.333	147.776	1176.68	638.449	5.82159	1163.28	619.058	210.138	1029.82	760.003	-92.676	1023.83	737.846	73.5714	966.393	641.746	347.227	691.377	717.209	339.255	742.759	438.985	257.022	750.821	453.709	270.284	756.617	358.379	246.279	736.851	271.864	-223.058	680.812	689.505	-161.791	740.332	421.755	-80.1869	754.868	436.615	-88.9536	763.202	340.273	-54.5939	733.509	256.108
9	0.08	83.0114	1172.47	584.359	147.79	1176.61	638.392	5.87341	1163.17	619.069	210.17	1029.79	759.973	-92.6487	1023.78	737.828	73.633	966.26	641.833	347.227	691.358	717.19	339.292	742.71	439.013	256.976	750.945	453.604	270.32	756.57	358.369	246.318	736.795	271.833	-223.054	680.82	689.534	-161.76	740.296	421.713	-80.1477	754.81	436.591	-88.9071	763.089	340.387	-54.5506	733.465	256.077
10	0.09	83.0097	1172.4	584.353	147.777	1176.54	638.354	5.87919	1163.08	619.109	210.18	1029.76	759.941	-92.6239	1023.74	737.83	73.6632	966.131	641.963	347.245	691.365	717.196	339.303	742.67	439.021	256.777	751.236	453.375	270.332	756.534	358.358	246.321	736.748	271.824	-223.067	680.803	689.533	-161.74	740.267	421.727	-80.1219	754.768	436.601	-88.8854	762.969	340.545	-54.5396	733.456	256.018
11	0.1	82.9796	1172.34	584.411	147.744	1176.52	638.365	5.84505	1163.03	619.164	210.157	1029.75	759.922	-92.6262	1023.73	737.851	73.6467	966.039	642.085	347.255	691.369	717.193	339.278	742.672	439.016	256.698	751.299	453.308	270.313	756.52	358.358	246.301	736.746	271.851	-223.072	680.773	689.477	-161.755	740.261	421.777	-80.1552	754.741	436.665	-88.9012	762.903	340.649	-54.5329	733.374	256.17
12	0.11	82.9503	1172.32	584.466	147.721	1176.54	638.341	5.80419	1163.05	619.122	210.148	1029.75	759.89	-92.6495	1023.75	737.836	73.6124	966.036	642.097	347.267	691.372	717.201	339.258	742.674	439.016	256.752	751.155	453.426	270.286	756.524	358.362	246.292	736.76	271.864	-223.083	680.761	689.462	-161.77	740.267	421.776	-80.1833	754.759	436.677	-88.9166	762.932	340.64	-54.5751	733.409	256.114
13	0.12	82.9405	1172.36	584.412	147.722	1176.58	638.315	5.78022	1163.12	619.03	210.162	1029.78	759.867	-92.6599	1023.78	737.801	73.6028	966.125	641.953	347.284	691.393	717.208	339.263	742.689	438.979	256.965	750.828	453.688	270.289	756.542	358.384	246.299	736.802	271.855	-223.085	680.793	689.48	-161.768	740.285	421.765	-80.1772	754.801	436.643	-88.9272	763.02	340.534	-54.6155	733.532	255.924
14	0.13	82.9309	1172.43	584.297	147.707	1176.62	638.277	5.75493	1163.21	618.954	210.161	1029.82	759.851	-92.6572	1023.83	737.804	73.5783	966.237	641.828	347.291	691.403	717.225	339.266	742.72	438.984	257.034	750.766	453.759	270.312	756.601	358.413	246.314	736.835	271.861	-223.078	680.839	689.526	-161.755	740.324	421.768	-80.1666	754.844	436.615	-88.9532	763.162	340.37	-54.6028	733.568	255.988
15	0.14	82.8998	1172.53	584.163	147.71	1176.65	638.265	5.72924	1163.29	618.88	210.16	1029.85	759.829	-92.6494	1023.88	737.808	73.5818	966.35	641.721	347.304	691.402	717.222	339.272	742.75	438.983	257.077	750.766	453.83	270.322	756.645	358.423	246.334	736.867	271.854	-223.076	680.862	689.498	-161.755	740.362	421.742	-80.1606	754.889	436.611	-88.9634	763.271	340.244	-54.5851	733.574	256.064
16	0.15	82.9115	1172.57	584.076	147.733	1176.66	638.25	5.73379	1163.31	618.821	210.182	1029.85	759.797	-92.6295	1023.9	737.789	73.6197	966.4	641.63	347.328	691.401	717.223	339.299	742.757	438.978	257.107	750.794	453.813	270.345	756.656	358.408	246.36	736.887	271.847	-223.066	680.886	689.517	-161.753	740.373	421.697	-80.156	754.905	436.578	-88.9464	763.293	340.157	-54.5977	733.655	255.906
17	0.16	82.9337	1172.51	584.117	147.755	1176.63	638.217	5.74982	1163.25	618.816	210.209	1029.83	759.736	-92.6054	1023.87	737.804	73.6476	966.328	641.648	347.37	691.415	717.233	339.335	742.732	438.99	257.12	750.789	453.803	270.372	756.628	358.421	246.382	736.86	271.843	-223.033	680.884	689.535	-161.741	740.357	421.691	-80.1252	754.88	436.584	-88.9122	763.242	340.179	-54.5844	733.628	255.866
18	0.17	82.9238	1172.43	584.214	147.744	1176.58	638.187	5.75395	1163.17	618.882	210.219	1029.81	759.709	-92.591	1023.84	737.796	73.6324	966.165	641.831	347.403	691.41	717.2	339.347	742.697	439.017	257.083	750.781	453.779	270.386	756.581	358.457	246.373	736.816	271.842	-223.04	680.855	689.504	-161.75	740.316	421.741	-80.1385	754.828	436.628	-88.9051	763.123	340.349	-54.5807	733.58	255.858
19	0.18	82.8766	1172.4	584.211	147.723	1176.55	638.137	5.7419	1163.14	618.914	210.217	1029.79	759.657	-92.597	1023.83	737.786	73.6037	966.057	641.902	347.415	691.4	717.18	339.32	742.681	439.006	257.059	750.752	453.769	270.346	756.545	358.419	246.344	736.779	271.837	-223.067	680.812	689.44	-161.78	740.29	421.717	-80.1782	754.798	436.64	-88.9352	763.03	340.457	-54.6054	733.51	255.934
20	0.19	82.8368	1172.36	584.174	147.696	1176.54	638.092	5.69737	1163.13	618.871	210.203	1029.78	759.602	-92.6227	1023.83	737.753	73.5748	966.014	641.903	347.433	691.411	717.208	339.288	742.67	438.982	257.027	750.728	453.746	270.301	756.524	358.372	246.316	736.769	271.839	-223.093	680.806	689.442	-161.782	740.276	421.726	-80.2022	754.789	436.627	-88.9635	763.021	340.417	-54.6084	733.452	256.033
21	0.2	82.8205	1172.35	584.221	147.672	1176.53	638.096	5.68635	1163.12	618.923	210.197	1029.78	759.599	-92.6336	1023.83	737.738	73.5424	965.998	641.957	347.442	691.435	717.244	339.281	742.663	438.993	257	750.733	453.7	270.286	756.52	358.387	246.296	736.776	271.843	-223.1	680.804	689.459	-161.787	740.264	421.735	-80.1996	754.775	436.657	-88.975	763.008	340.48	-54.6285	733.524	255.903
22	0.21	82.8185	1172.34	584.222	147.668	1176.54	638.099	5.67406	1163.11	618.909	210.191	1029.79	759.567	-92.6392	1023.85	737.73	73.5351	966.02	641.94	347.446	691.451	717.248	339.281	742.673	438.965	256.994	750.745	453.689	270.266	756.529	358.39	246.289	736.787	271.848	-223.08	680.835	689.48	-161.802	740.261	421.72	-80.2021	754.78	436.655	-88.9785	763.022	340.495	-54.6364	733.542	255.889
23	0.22	82.8391	1172.38	584.129	147.693	1176.57	638.047	5.67614	1163.18	618.779	210.183	1029.82	759.531	-92.6469	1023.88	737.709	73.5417	966.092	641.776	347.451	691.46	717.23	339.269	742.704	438.933	257.017	750.787	453.682	270.265	756.558	358.364	246.279	736.826	271.84	-223.064	680.901	689.516	-161.798	740.297	421.673	-80.1959	754.813	436.616	-88.9729	763.109	340.352	-54.6366	733.549	255.928
24	0.23	82.8576	1172.44	584.054	147.702	1176.6	638.002	5.69839	1163.23	618.72	210.189	1029.86	759.503	-92.6385	1023.92	737.73	73.5611	966.187	641.673	347.463	691.476	717.245	339.274	742.742	438.932	257.019	750.83	453.664	270.282	756.605	358.372	246.28	736.864	271.835	-223.057	680.938	689.51	-161.775	740.331	421.68	-80.1779	754.846	436.621	-88.9578	763.183	340.253	-54.5954	733.502	256.126
25	0.24	82.8462	1172.46	583.959	147.712	1176.6	637.992	5.71871	1163.23	618.739	210.201	1029.88	759.512	-92.6276	1023.94	737.761	73.5576	966.225	641.715	347.464	691.486	717.266	339.286	742.758	438.95	257.036	750.838	453.687	270.305	756.622	358.399	246.284	736.868	271.85	-223.056	680.955	689.549	-161.775	740.335	421.724	-80.1762	754.862	436.655	-88.9367	763.187	340.31	-54.5889	733.535	256.106
26	0.25	82.8722	1172.42	583.885	147.722	1176.57	637.973	5.72528	1163.21	618.694	210.205	1029.86	759.512	-92.6315	1023.92	737.737	73.547	966.205	641.719	347.464	691.473	717.243	339.307	742.737	438.962	257.05	750.84	453.686	270.319	756.614	358.375	246.294	736.856	271.86	-223.068	680.928	689.566	-161.421	739.917	422.259	-80.1758	754.855	436.639	-88.9164	763.119	340.31	-54.6102	733.612	255.905
27	0.26	82.8972	1172.39	583.816	147.737	1176.54	637.975	5.72518	1163.17	618.651	210.206	1029.85	759.53	-92.6361	1023.89	737.72	73.5684	966.179	641.707	347.462	691.463	717.227	339.315	742.703	438.938	257.076	750.82	453.685	270.319	756.595	358.34	246.312	736.839	271.878	-223.07	680.871	689.503	-160.944	739.389	422.947	-80.1634	754.837	436.619	-88.8991	763.023	340.283	-54.6019	733.566	255.928
28	0.27	82.886	1172.32	583.91	147.738	1176.49	638.004	5.70744	1163.12	618.725	210.197	1029.85	759.531	-92.6373	1023.88	737.729	73.5472	966.127	641.777	347.479	691.489	717.25	339.306	742.692	438.92	257.083	750.782	453.726	270.303	756.553	358.339	246.308	736.813	271.875	-223.076	680.815	689.453	-161.556	740.075	421.997	-80.1727	754.8	436.643	-88.9499	763.079	340.316	-54.5819	733.436	256.079
29	0.28	82.8851	1172.25	584.034	147.723	1176.46	638.016	5.70658	1163.06	618.799	210.193	1029.86	759.551	-92.6426	1023.86	737.734	73.5237	966.062	641.896	347.497	691.5	717.227	339.288	742.685	438.947	257.045	750.756	453.764	270.284	756.522	358.377	246.289	736.791	271.878	-223.078	680.77	689.416	-161.723	740.232	421.766	-80.2008	754.773	436.669	-88.9834	763.035	340.419	-54.6003	733.431	256.072
30	0.29	82.897	1172.23	584.102	147.718	1176.45	638.025	5.7369	1163.04	618.764	210.185	1029.86	759.576	-92.6415	1023.85	737.756	73.5425	966.037	641.929	347.499	691.522	717.219	339.306	742.691	438.994	257.021	750.768	453.743	270.266	756.514	358.398	246.263	736.77	271.879	-223.086	680.771	689.364	-161.77	740.284	421.752	-80.1899	754.773	436.677	-88.9602	763.018	340.472	-54.6393	733.513	255.923
31	0.3	82.9202	1172.25	584.084	147.731	1176.46	638.046	5.76809	1163.04	618.743	210.187	1029.88	759.62	-92.6343	1023.86	737.766	73.5917	966.046	641.948	347.489	691.543	717.254	339.316	742.701	439.013	257.042	750.805	453.747	270.269	756.513	358.395	246.247	736.774	271.878	-223.08	680.81	689.418	-161.754	740.292	421.767	-80.1674	754.795	436.689	-88.9211	763.024	340.487	-54.6259	733.549	255.901
32	0.31	82.9425	1172.28	584.038	147.755	1176.48	638.074	5.79696	1163.05	618.738	210.198	1029.88	759.629	-92.6225	1023.87	737.762	73.6097	966.097	641.941	347.493	691.556	717.282	339.335	742.722	439.015	257.083	750.842	453.758	270.282	756.537	358.397	246.28	736.797	271.891	-223.062	680.867	689.508	-161.726	740.303	421.74	-80.1298	754.823	436.683	-88.8885	763.063	340.454	-54.6102	733.582	255.891
33	0.32	82.9623	1172.3	583.954	147.759	1176.51	638.044	5.80223	1163.1	618.669	210.215	1029.89	759.6	-92.6219	1023.89	737.761	73.6092	966.193	641.79	347.495	691.566	717.273	339.341	742.743	438.937	257.11	750.85	453.763	270.296	756.56	358.352	246.312	736.83	271.87	-223.046	680.928	689.565	-161.722	740.33	421.712	-80.1049	754.852	436.634	-88.872	763.126	340.355	-54.5886	733.619	255.847
34	0.33	82.9556	1172.34	583.875	147.737	1176.55	638.022	5.77325	1163.14	618.634	210.205	1029.91	759.6	-92.6326	1023.91	737.754	73.5992	966.276	641.692	347.497	691.564	717.253	339.345	742.756	438.876	257.127	750.851	453.747	270.284	756.577	358.311	246.307	736.855	271.847	-223.041	680.93	689.548	-161.736	740.356	421.702	-80.1178	754.873	436.568	-88.8913	763.197	340.227	-54.592	733.639	255.831
35	0.34	82.8853	1172.36	583.86	147.696	1176.55	638.035	5.7096	1163.14	618.692	210.171	1029.92	759.643	-92.663	1023.91	737.761	73.5374	966.299	641.691	347.512	691.564	717.235	339.3	742.761	438.896	257.049	750.848	453.683	270.247	756.579	358.336	246.27	736.869	271.85	-223.06	680.894	689.515	-161.779	740.362	421.731	-80.1686	754.881	436.566	-88.9529	763.191	340.253	-54.6185	733.606	255.912
36	0.35	82.8256	1172.34	583.98	147.66	1176.54	638.066	5.67075	1163.11	618.735	210.147	1029.9	759.672	-92.6752	1023.9	737.821	73.485	966.256	641.769	347.535	691.565	717.233	339.274	742.749	438.952	256.988	750.833	453.659	270.212	756.568	358.357	246.23	736.846	271.894	-223.065	680.82	689.504	-161.822	740.338	421.744	-80.217	754.842	436.645	-88.9977	763.148	340.336	-54.6229	733.485	256.115
37	0.36	82.8224	1172.3	584.077	147.664	1176.52	638.078	5.66572	1163.07	618.804	210.158	1029.87	759.693	-92.661	1023.86	737.845	73.4873	966.224	641.85	347.562	691.545	717.221	339.299	742.721	438.975	256.984	750.818	453.645	270.227	756.534	358.36	246.235	736.811	271.894	-223.068	680.768	689.48	-161.807	740.294	421.754	-80.2146	754.811	436.678	-88.9853	763.087	340.415	-54.6249	733.457	256.087
38	0.37	82.8443	1172.25	584.155	147.675	1176.5	638.074	5.68876	1163.03	618.861	210.204	1029.86	759.693	-92.631	1023.84	737.83	73.5253	966.187	641.873	347.585	691.549	717.215	339.329	742.699	438.969	257.031	750.808	453.66	270.259	756.505	358.353	246.251	736.785	271.883	-223.049	680.753	689.44	-161.766	740.268	421.772	-80.1823	754.775	436.679	-88.9444	763.023	340.474	-54.6155	733.472	255.98
39	0.38	82.853	1172.27	584.171	147.683	1176.52	638.09	5.7087	1163.03	618.899	210.221	1029.87	759.708	-92.6086	1023.84	737.844	73.5593	966.179	641.924	347.609	691.587	717.243	339.342	742.706	438.958	257.068	750.827	453.705	270.264	756.509	358.346	246.258	736.787	271.891	-223.028	680.823	689.494	-161.754	740.297	421.77	-80.166	754.771	436.683	-88.9238	763.017	340.499	-54.5739	733.414	256.148
40	0.39	82.8696	1172.34	584.213	147.699	1176.57	638.137	5.73099	1163.06	618.956	210.224	1029.91	759.715	-92.5888	1023.89	737.882	73.5802	966.229	641.909	347.618	691.626	717.258	339.333	742.731	438.942	257.084	750.863	453.74	270.263	756.534	358.356	246.261	736.818	271.909	-222.989	680.913	689.558	-161.751	740.321	421.741	-80.152	754.809	436.674	-88.9171	763.052	340.483	-54.5711	733.465	256.116
41	0.4	82.8654	1172.42	584.153	147.703	1176.6	638.142	5.72981	1163.12	618.936	210.226	1029.94	759.685	-92.5861	1023.93	737.877	73.5942	966.319	641.782	347.616	691.646	717.264	339.329	742.753	438.926	257.093	750.874	453.709	270.262	756.558	358.354	246.265	736.846	271.887	-222.993	680.967	689.579	-161.744	740.327	421.734	-80.1391	754.83	436.639	-88.9057	763.098	340.443	-54.5978	733.589	255.931
42	0.41	82.8569	1172.44	584.147	147.689	1176.63	638.142	5.71769	1163.17	618.905	210.212	1029.94	759.674	-92.5823	1023.94	737.908	73.5696	966.373	641.758	347.614	691.647	717.29	339.333	742.757	438.905	257.099	750.865	453.706	270.24	756.571	358.321	246.265	736.854	271.873	-223.02	680.989	689.624	-161.739	740.339	421.792	-80.1437	754.852	436.62	-88.9163	763.138	340.364	-54.5893	733.577	255.957
43	0.42	82.8557	1172.42	584.209	147.687	1176.64	638.148	5.71097	1163.21	618.923	210.224	1029.93	759.687	-92.5694	1023.94	737.943	73.5463	966.394	641.763	347.614	691.652	717.319	339.327	742.743	438.911	257.112	750.857	453.738	270.256	756.57	358.325	246.267	736.852	271.858	-223.032	680.963	689.602	-161.356	739.92	422.364	-80.1511	754.846	436.606	-88.9047	763.054	340.393	-54.5636	733.472	256.118
44	0.43	82.8552	1172.41	584.252	147.697	1176.62	638.178	5.70113	1163.23	618.941	210.247	1029.93	759.679	-92.5552	1023.93	737.94	73.5726	966.385	641.762	347.622	691.655	717.313	339.334	742.732	438.924	257.116	750.833	453.749	270.28	756.563	358.334	246.278	736.842	271.867	-223.031	680.937	689.534	-160.895	739.382	422.993	-80.1399	754.824	436.59	-88.8827	762.939	340.457	-54.554	733.438	256.159
45	0.44	82.8515	1172.42	584.309	147.707	1176.62	638.194	5.69339	1163.22	618.97	210.246	1029.92	759.695	-92.5606	1023.94	737.925	73.5625	966.374	641.81	347.655	691.66	717.303	339.348	742.722	438.951	257.113	750.819	453.77	270.277	756.554	358.344	246.278	736.827	271.905	-223.026	680.921	689.472	-161.54	740.09	422.049	-80.1604	754.805	436.635	-88.9235	763.053	340.411	-54.5918	733.466	256.086
46	0.45	82.8299	1172.46	584.379	147.705	1176.65	638.249	5.6841	1163.22	619.045	210.244	1029.93	759.729	-92.5599	1023.94	737.958	73.521	966.394	641.871	347.677	691.651	717.29	339.323	742.727	438.992	257.09	750.831	453.799	270.255	756.548	358.378	246.27	736.821	271.937	-223.03	680.914	689.464	-161.705	740.284	421.845	-80.1883	754.808	436.686	-88.9367	763.071	340.452	-54.6513	733.565	255.924
47	0.46	82.8458	1172.5	584.325	147.707	1176.67	638.254	5.70952	1163.23	619.077	210.265	1029.93	759.742	-92.5356	1023.95	737.978	73.5419	966.398	641.911	347.688	691.623	717.283	339.329	742.738	439.004	257.097	750.861	453.775	270.274	756.547	358.395	246.277	736.822	271.948	-223.017	680.931	689.481	-161.742	740.335	421.79	-80.1798	754.821	436.674	-88.9234	763.1	340.428	-54.6279	733.548	255.982
48	0.47	82.8917	1172.52	584.268	147.752	1176.65	638.228	5.76377	1163.23	619.04	210.302	1029.92	759.696	-92.5126	1023.95	737.958	73.6164	966.412	641.829	347.677	691.621	717.276	339.367	742.738	438.969	257.129	750.878	453.721	270.293	756.548	358.34	246.294	736.823	271.908	-222.996	680.971	689.494	-161.73	740.339	421.765	-80.153	754.828	436.594	-88.899	763.115	340.367	-54.5758	733.508	256.047
49	0.48	82.9199	1172.5	584.28	147.785	1176.65	638.242	5.80765	1163.21	619.018	210.323	1029.92	759.669	-92.4968	1023.95	737.961	73.6448	966.396	641.803	347.673	691.637	717.288	339.385	742.73	438.936	257.139	750.873	453.711	270.296	756.522	358.323	246.283	736.812	271.875	-223.01	681.049	689.566	-161.717	740.323	421.729	-80.1229	754.816	436.599	-88.8896	763.084	340.411	-54.5808	733.568	255.904
50	0.49	82.9206	1172.48	584.356	147.769	1176.66	638.2	5.8282	1163.2	619.041	210.32	1029.93	759.686	-92.4866	1023.98	737.968	73.6395	966.396	641.807	347.672	691.675	717.301	339.364	742.73	438.901	257.119	750.876	453.716	270.28	756.524	358.349	246.244	736.82	271.87	-223.035	681.101	689.612	-161.721	740.332	421.719	-80.1271	754.82	436.631	-88.9053	763.079	340.424	-54.581	733.545	255.94
51	0.5	82.9005	1172.47	584.317	147.741	1176.67	638.167	5.80249	1163.22	619.047	210.293	1029.94	759.693	-92.5012	1024	737.957	73.6021	966.409	641.805	347.656	691.684	717.3	339.314	742.738	438.899	257.058	750.887	453.686	270.222	756.537	358.329	246.202	736.833	271.867	-223.055	681.098	689.566	-161.74	740.346	421.739	-80.1586	754.841	436.604	-88.9397	763.097	340.399	-54.5998	733.514	256.026
52	0.51	82.869	1172.46	584.278	147.729	1176.66	638.169	5.77622	1163.22	619.029	210.261	1029.93	759.677	-92.5228	1024	737.946	73.5774	966.403	641.832	347.647	691.663	717.286	339.278	742.742	438.892	257.015	750.878	453.652	270.186	756.538	358.31	246.174	736.833	271.858	-223.08	681.071	689.517	-161.786	740.34	421.765	-80.1995	754.826	436.621	-88.9774	763.086	340.429	-54.6591	733.58	255.887
53	0.52	82.9166	1172.44	584.32	147.75	1176.63	638.139	5.79582	1163.22	619.029	210.26	1029.93	759.686	-92.519	1024.02	737.951	73.5593	966.393	641.859	347.655	691.658	717.3	339.291	742.74	438.913	257.021	750.865	453.648	270.193	756.538	358.31	246.169	736.83	271.868	-223.099	681.036	689.5	-161.798	740.329	421.767	-80.2018	754.816	436.66	-88.9804	763.076	340.462	-54.6532	733.539	255.945
54	0.53	82.9698	1172.46	584.266	147.797	1176.62	638.124	5.83438	1163.24	619	210.301	1029.92	759.688	-92.5019	1024.01	737.945	73.5595	966.438	641.749	347.663	691.641	717.317	339.311	742.737	438.901	257.053	750.867	453.651	270.232	756.543	358.311	246.2	736.838	271.876	-223.088	681.031	689.519	-161.764	740.328	421.768	-80.1727	754.818	436.65	-88.9529	763.103	340.415	-54.6194	733.496	256.034
55	0.54	83.0216	1172.49	584.172	147.84	1176.63	638.125	5.86354	1163.25	618.953	210.327	1029.93	759.642	-92.4942	1024.02	737.919	73.5864	966.509	641.616	347.657	691.619	717.289	339.337	742.748	438.887	257.108	750.87	453.683	270.261	756.564	358.292	246.238	736.861	271.876	-223.065	681.052	689.525	-161.738	740.342	421.729	-80.1403	754.839	436.597	-88.9332	763.165	340.282	-54.6277	733.591	255.861
56	0.55	83.0477	1172.51	584.109	147.865	1176.63	638.129	5.89406	1163.26	618.929	210.328	1029.95	759.647	-92.4752	1024.03	737.92	73.6202	966.513	641.64	347.662	691.592	717.247	339.35	742.749	438.906	257.124	750.901	453.711	270.284	756.577	358.33	246.253	736.867	271.898	-223.034	681.084	689.554	-161.747	740.354	421.752	-80.1352	754.846	436.595	-88.9296	763.188	340.261	-54.6165	733.579	255.91
57	0.56	83.0718	1172.47	584.128	147.894	1176.62	638.129	5.93567	1163.24	618.96	210.34	1029.95	759.696	-92.449	1024.03	737.906	73.654	966.463	641.718	347.666	691.575	717.236	339.37	742.747	438.942	257.112	750.903	453.744	270.307	756.58	358.375	246.267	736.851	271.927	-223.006	681.099	689.568	-161.355	739.936	422.348	-80.1453	754.836	436.638	-88.9061	763.097	340.34	-54.5658	733.478	256.097
58	0.57	83.0953	1172.43	584.091	147.912	1176.59	638.111	5.97061	1163.2	618.916	210.35	1029.95	759.683	-92.4488	1024.03	737.882	73.6829	966.406	641.741	347.662	691.591	717.257	339.37	742.742	438.941	257.124	750.891	453.732	270.317	756.561	358.365	246.275	736.831	271.914	-223.01	681.095	689.556	-160.863	739.394	423.036	-80.1433	754.818	436.634	-88.8737	762.993	340.373	-54.5369	733.437	256.119
59	0.58	83.1379	1172.37	584.054	147.919	1176.55	638.069	6.00233	1163.15	618.883	210.363	1029.94	759.671	-92.4435	1024.01	737.88	73.7075	966.369	641.747	347.643	691.61	717.275	339.367	742.736	438.92	257.137	750.868	453.723	270.318	756.546	358.345	246.274	736.821	271.882	-223.044	681.088	689.567	-161.503	740.091	422.043	-80.1115	754.81	436.612	-88.8615	763.031	340.449	-54.5348	733.445	256.051
60	0.59	83.1685	1172.32	584.077	147.922	1176.53	638.043	6.00519	1163.12	618.859	210.369	1029.94	759.651	-92.4436	1024.01	737.87	73.6864	966.373	641.763	347.631	691.634	717.289	339.356	742.729	438.92	257.125	750.839	453.727	270.298	756.543	358.358	246.25	736.819	271.881	-223.072	681.09	689.567	-161.667	740.261	421.804	-80.1164	754.814	436.631	-88.8775	763.032	340.498	-54.5769	733.534	255.893
61	0.6	83.1567	1172.3	584.114	147.906	1176.53	638.032	5.95886	1163.13	618.803	210.328	1029.95	759.629	-92.4687	1024.04	737.871	73.6394	966.396	641.753	347.62	691.654	717.29	339.325	742.737	438.904	257.094	750.828	453.761	270.265	756.548	358.363	246.219	736.832	271.896	-223.091	681.085	689.545	-161.732	740.322	421.768	-80.1608	754.823	436.677	-88.9405	763.071	340.435	-54.6118	733.565	255.878
62	0.61	83.1309	1172.3	584.048	147.891	1176.53	637.997	5.93175	1163.15	618.752	210.309	1029.96	759.625	-92.4876	1024.06	737.852	73.6208	966.436	641.755	347.609	691.653	717.283	339.293	742.744	438.905	257.061	750.834	453.761	270.236	756.557	358.361	246.198	736.841	271.891	-223.09	681.083	689.521	-161.773	740.345	421.732	-80.1897	754.825	436.669	-88.9689	763.129	340.347	-54.6345	733.535	255.944
63	0.62	83.1597	1172.31	583.962	147.905	1176.53	637.985	5.95511	1163.14	618.721	210.311	1029.96	759.622	-92.4617	1024.06	737.84	73.644	966.438	641.727	347.629	691.645	717.288	339.308	742.743	438.929	257.072	750.852	453.741	270.246	756.554	358.364	246.211	736.836	271.888	-223.08	681.079	689.52	-161.776	740.344	421.752	-80.1905	754.842	436.644	-88.9579	763.151	340.327	-54.6111	733.501	256.026
64	0.63	83.2027	1172.31	583.897	147.939	1176.51	637.955	6.01184	1163.11	618.687	210.344	1029.96	759.633	-92.4402	1024.05	737.839	73.6823	966.423	641.688	347.643	691.626	717.281	339.343	742.734	438.935	257.12	750.858	453.751	270.296	756.548	358.374	246.257	736.832	271.897	-223.059	681.093	689.525	-161.747	740.348	421.76	-80.1475	754.852	436.623	-88.9185	763.14	340.336	-54.5997	733.565	255.893
65	0.64	83.2253	1172.3	583.824	147.957	1176.48	637.944	6.04635	1163.09	618.646	210.362	1029.96	759.623	-92.4276	1024.03	737.823	73.707	966.432	641.64	347.655	691.611	717.259	339.379	742.718	438.938	257.151	750.877	453.745	270.328	756.554	358.379	246.29	736.828	271.885	-223.053	681.113	689.527	-161.736	740.367	421.732	-80.1179	754.845	436.616	-88.8937	763.145	340.332	-54.586	733.582	255.85
66	0.65	83.2269	1172.3	583.802	147.967	1176.49	637.931	6.05046	1163.08	618.581	210.359	1029.95	759.602	-92.4425	1024.03	737.825	73.7037	966.445	641.617	347.661	691.602	717.231	339.389	742.72	438.948	257.135	750.892	453.697	270.326	756.568	358.379	246.297	736.822	271.867	-223.062	681.118	689.531	-161.733	740.369	421.697	-80.1347	754.835	436.622	-88.8851	763.138	340.335	-54.5754	733.555	255.919
67	0.66	83.1946	1172.28	583.797	147.955	1176.49	637.899	6.02013	1163.08	618.584	210.348	1029.95	759.585	-92.4613	1024.04	737.801	73.676	966.438	641.63	347.656	691.598	717.234	339.354	742.724	438.945	257.103	750.883	453.673	270.319	756.592	358.382	246.269	736.829	271.869	-223.076	681.093	689.518	-161.758	740.36	421.709	-80.172	754.839	436.637	-88.9112	763.134	340.332	-54.563	733.47	256.1
68	0.67	83.1648	1172.27	583.759	147.922	1176.48	637.872	5.97114	1163.07	618.561	210.324	1029.95	759.562	-92.4799	1024.04	737.761	73.6477	966.449	641.609	347.654	691.615	717.26	339.328	742.717	438.932	257.067	750.851	453.667	270.309	756.585	358.345	246.247	736.839	271.857	-223.111	681.059	689.465	-161.775	740.344	421.716	-80.193	754.834	436.63	-88.9447	763.132	340.307	-54.5938	733.477	256.052
69	0.68	83.1634	1172.23	583.758	147.906	1176.46	637.849	5.96011	1163.05	618.544	210.307	1029.95	759.549	-92.4976	1024.03	737.742	73.6375	966.413	641.631	347.638	691.616	717.264	339.318	742.698	438.894	257.052	750.813	453.668	270.296	756.575	358.311	246.23	736.834	271.852	-223.149	681.043	689.445	-161.775	740.331	421.7	-80.1976	754.826	436.619	-88.9481	763.086	340.374	-54.6287	733.551	255.871
70	0.69	83.156	1172.19	583.814	147.918	1176.44	637.85	5.97446	1163.02	618.576	210.302	1029.95	759.561	-92.5	1024.01	737.748	73.6347	966.345	641.693	347.625	691.639	717.297	339.321	742.681	438.901	257.071	750.807	453.685	270.277	756.567	358.313	246.217	736.824	271.85	-223.175	681.034	689.448	-161.763	740.323	421.709	-80.1818	754.813	436.631	-88.9545	763.056	340.411	-54.6131	733.552	255.829
71	0.7	83.1514	1172.17	583.857	147.915	1176.43	637.836	5.99291	1162.98	618.633	210.297	1029.96	759.573	-92.4922	1024.01	737.77	73.6638	966.321	641.789	347.621	691.655	717.333	339.342	742.683	438.952	257.084	750.836	453.716	270.287	756.573	358.359	246.214	736.818	271.866	-223.161	681.036	689.462	-161.753	740.325	421.725	-80.1595	754.804	436.632	-88.9344	763.04	340.487	-54.5873	733.514	255.943
72	0.71	83.1686	1172.21	583.816	147.917	1176.45	637.844	6.00179	1162.99	618.608	210.302	1029.97	759.571	-92.4759	1024.02	737.774	73.6899	966.348	641.786	347.613	691.652	717.318	339.352	742.701	438.974	257.1	750.895	453.701	270.301	756.587	358.376	246.224	736.831	271.873	-223.126	681.074	689.492	-161.75	740.346	421.742	-80.1389	754.819	436.656	-88.8976	763.062	340.476	-54.5497	733.471	256.058
73	0.72	83.1757	1172.25	583.704	147.932	1176.47	637.869	6.00853	1163.03	618.532	210.311	1029.98	759.542	-92.4681	1024.03	737.754	73.6991	966.381	641.689	347.596	691.629	717.278	339.365	742.719	438.939	257.143	750.923	453.716	270.324	756.606	358.377	246.249	736.864	271.867	-223.102	681.111	689.52	-161.728	740.357	421.709	-80.1298	754.862	436.61	-88.8718	763.102	340.438	-54.5843	733.579	255.902
74	0.73	83.1757	1172.27	583.614	147.942	1176.5	637.854	6.00305	1163.05	618.456	210.318	1030	759.539	-92.4639	1024.04	737.755	73.7056	966.441	641.587	347.592	691.618	717.258	339.384	742.735	438.913	257.186	750.926	453.761	270.347	756.621	358.373	246.279	736.882	271.859	-223.089	681.126	689.533	-161.729	740.368	421.703	-80.1087	754.892	436.536	-88.8695	763.167	340.333	-54.5742	733.578	255.921
75	0.74	83.175	1172.25	583.647	147.926	1176.49	637.806	5.99503	1163.05	618.414	210.309	1029.99	759.516	-92.4756	1024.05	737.745	73.7009	966.457	641.556	347.587	691.618	717.252	339.39	742.736	438.901	257.206	750.921	453.766	270.351	756.616	358.344	246.301	736.876	271.863	-223.093	681.103	689.512	-161.726	740.356	421.705	-80.1076	754.884	436.55	-88.8807	763.181	340.286	-54.5428	733.523	255.999
76	0.75	83.1301	1172.24	583.634	147.904	1176.47	637.788	5.94098	1163.03	618.426	210.28	1029.97	759.525	-92.5071	1024.03	737.723	73.6749	966.429	641.579	347.575	691.612	717.232	339.364	742.712	438.897	257.153	750.887	453.732	270.335	756.598	358.346	246.287	736.845	271.881	-223.118	681.029	689.443	-161.745	740.349	421.697	-80.1371	754.855	436.584	-88.895	763.154	340.29	-54.5635	733.532	255.935
77	0.76	83.0423	1172.21	583.654	147.864	1176.46	637.824	5.85409	1163.02	618.437	210.221	1029.98	759.553	-92.5529	1024.01	737.711	73.6104	966.402	641.657	347.555	691.611	717.231	339.307	742.7	438.911	257.066	750.852	453.687	270.294	756.587	358.371	246.248	736.831	271.891	-223.152	680.96	689.369	-161.79	740.334	421.69	-80.2027	754.83	436.651	-88.9354	763.105	340.349	-54.5824	733.443	256.105
78	0.77	83.0106	1172.17	583.755	147.824	1176.44	637.844	5.80834	1162.98	618.469	210.181	1029.97	759.58	-92.5818	1023.99	737.68	73.5676	966.363	641.695	347.543	691.619	717.246	339.282	742.7	438.937	257.006	750.833	453.699	270.267	756.581	358.381	246.211	736.809	271.894	-223.18	680.955	689.341	-161.823	740.317	421.722	-80.2274	754.806	436.69	-88.9646	763.053	340.425	-54.6024	733.405	256.163
79	0.78	83.0247	1172.15	583.771	147.822	1176.43	637.851	5.833	1162.95	618.471	210.188	1029.98	759.572	-92.5777	1023.97	737.667	73.5928	966.292	641.73	347.54	691.635	717.251	339.307	742.69	438.943	257.021	750.826	453.715	270.289	756.57	358.374	246.221	736.794	271.873	-223.179	680.975	689.371	-161.807	740.291	421.701	-80.1965	754.786	436.683	-88.9337	763.021	340.486	-54.5872	733.417	256.097
80	0.79	83.0514	1172.16	583.69	147.842	1176.44	637.846	5.88086	1162.95	618.403	210.21	1029.99	759.544	-92.5636	1023.97	737.662	73.6505	966.29	641.678	347.528	691.645	717.251	339.34	742.695	438.939	257.094	750.848	453.713	270.323	756.551	358.362	246.248	736.803	271.832	-223.165	681.024	689.421	-161.772	740.3	421.679	-80.1475	754.802	436.647	-88.8914	763.011	340.517	-54.593	733.495	255.908
81	0.8	83.0506	1172.2	583.649	147.838	1176.48	637.852	5.89401	1162.99	618.331	210.205	1030.02	759.53	-92.5658	1023.99	737.659	73.6686	966.344	641.62	347.501	691.651	717.27	339.361	742.714	438.946	257.125	750.886	453.717	270.347	756.569	358.379	246.27	736.825	271.84	-223.158	681.041	689.446	-161.755	740.338	421.694	-80.1308	754.847	436.585	-88.8752	763.044	340.483	-54.5742	733.551	255.849
82	0.81	83.0362	1172.25	583.572	147.804	1176.5	637.853	5.8626	1163.05	618.287	210.185	1030.02	759.534	-92.5733	1024	737.662	73.6412	966.398	641.582	347.489	691.651	717.301	339.35	742.733	438.931	257.141	750.908	453.742	270.354	756.606	358.401	246.278	736.848	271.85	-223.153	681.029	689.437	-161.752	740.366	421.684	-80.1458	754.882	436.55	-88.8965	763.116	340.371	-54.5828	733.596	255.836
83	0.82	83.0106	1172.26	583.576	147.785	1176.51	637.824	5.82525	1163.07	618.27	210.164	1030.02	759.542	-92.5891	1024.01	737.644	73.6002	966.464	641.462	347.488	691.649	717.288	339.325	742.752	438.903	257.12	750.891	453.717	270.351	756.63	358.395	246.273	736.865	271.84	-223.149	681.03	689.463	-161.745	740.348	421.694	-80.167	754.874	436.565	-88.9232	763.16	340.301	-54.5923	733.567	255.901
84	0.83	82.9749	1172.25	583.647	147.768	1176.51	637.823	5.76389	1163.06	618.293	210.145	1030.02	759.533	-92.6055	1024	737.64	73.5657	966.448	641.521	347.474	691.61	717.232	339.309	742.736	438.919	257.092	750.862	453.727	270.333	756.631	358.388	246.26	736.851	271.854	-223.168	681	689.454	-161.772	740.326	421.719	-80.2002	754.858	436.6	-88.9336	763.145	340.334	-54.5756	733.467	256.086
85	0.84	82.9435	1172.24	583.674	147.734	1176.5	637.826	5.70929	1163.03	618.327	210.112	1030	759.524	-92.6202	1023.97	737.636	73.5413	966.401	641.629	347.449	691.576	717.197	339.288	742.727	438.958	257.082	750.845	453.759	270.32	756.615	358.388	246.249	736.837	271.88	-223.191	680.951	689.425	-161.798	740.309	421.732	-80.2076	754.839	436.651	-88.9456	763.123	340.352	-54.5926	733.472	256.072
86	0.85	82.923	1172.23	583.641	147.734	1176.49	637.826	5.71445	1163	618.317	210.12	1030	759.53	-92.6183	1023.95	737.622	73.5552	966.373	641.622	347.422	691.561	717.188	339.299	742.731	438.948	257.086	750.847	453.781	270.335	756.605	358.383	246.269	736.836	271.882	-223.194	680.896	689.369	-161.783	740.3	421.716	-80.1833	754.826	436.652	-88.9356	763.121	340.307	-54.5937	733.504	255.972
87	0.86	82.9326	1172.24	583.606	147.744	1176.5	637.819	5.73312	1162.97	618.315	210.129	1030	759.515	-92.6064	1023.92	737.623	73.5941	966.322	641.634	347.409	691.55	717.185	339.329	742.74	438.942	257.108	750.861	453.784	270.353	756.607	358.41	246.296	736.839	271.878	-223.196	680.901	689.364	-161.381	739.89	422.243	-80.161	754.822	436.64	-88.8989	763.06	340.341	-54.5367	733.41	256.132
88	0.87	82.9455	1172.22	583.655	147.728	1176.51	637.797	5.72718	1162.97	618.298	210.123	1030.01	759.5	-92.6104	1023.93	737.625	73.6203	966.298	641.658	347.387	691.536	717.16	339.342	742.748	438.973	257.114	750.868	453.782	270.367	756.615	358.433	246.305	736.83	271.856	-223.212	680.918	689.345	-160.907	739.381	422.958	-80.1523	754.826	436.65	-88.8607	762.957	340.448	-54.5289	733.41	256.145
89	0.88	82.9166	1172.23	583.613	147.716	1176.54	637.791	5.71168	1162.98	618.31	210.107	1030.04	759.507	-92.6241	1023.95	737.633	73.6072	966.306	641.684	347.359	691.538	717.161	339.315	742.775	438.964	257.102	750.895	453.774	270.352	756.626	358.439	246.302	736.851	271.849	-223.208	680.934	689.349	-161.55	740.109	422.033	-80.158	754.846	436.644	-88.8713	763.079	340.405	-54.5249	733.431	256.161
90	0.89	82.8946	1172.26	583.549	147.693	1176.54	637.788	5.69535	1162.99	618.277	210.091	1030.06	759.501	-92.6362	1023.96	737.604	73.5922	966.32	641.626	347.336	691.56	717.189	339.298	742.791	438.944	257.09	750.906	453.77	270.327	756.636	358.405	246.285	736.858	271.824	-223.205	680.977	689.436	-161.701	740.277	421.784	-80.1693	754.857	436.638	-88.8842	763.114	340.375	-54.5365	733.477	256.097
91	0.9	82.8586	1172.22	583.528	147.657	1176.51	637.756	5.66248	1162.97	618.248	210.079	1030.04	759.501	-92.6436	1023.94	737.588	73.5741	966.267	641.648	347.323	691.553	717.177	339.295	742.767	438.94	257.065	750.889	453.712	270.319	756.622	358.37	246.27	736.838	271.815	-223.21	680.932	689.401	-161.741	740.294	421.686	-80.1575	754.84	436.629	-88.9187	763.097	340.377	-54.5683	733.552	255.9
92	0.91	82.8089	1172.17	583.623	147.619	1176.49	637.752	5.62941	1162.94	618.238	210.055	1030.02	759.504	-92.6666	1023.92	737.585	73.5363	966.221	641.728	347.314	691.537	717.157	339.279	742.753	438.945	257.024	750.883	453.667	270.294	756.604	358.349	246.248	736.825	271.83	-223.214	680.881	689.37	-161.772	740.298	421.684	-80.1786	754.822	436.642	-88.9425	763.068	340.419	-54.5901	733.523	255.931
93	0.92	82.7367	1172.16	583.596	147.588	1176.5	637.73	5.57156	1162.96	618.199	210.019	1030.01	759.497	-92.6937	1023.92	737.553	73.485	966.257	641.683	347.316	691.532	717.159	339.252	742.759	438.956	256.985	750.883	453.65	270.262	756.592	358.339	246.229	736.829	271.846	-223.199	680.875	689.38	-161.814	740.316	421.69	-80.2184	754.829	436.635	-88.9887	763.081	340.407	-54.6117	733.477	256.012
94	0.93	82.7134	1172.2	583.48	147.559	1176.51	637.694	5.53127	1162.98	618.174	210.016	1030.01	759.476	-92.693	1023.92	737.535	73.4647	966.316	641.607	347.32	691.528	717.157	339.241	742.778	438.963	256.996	750.882	453.691	270.258	756.593	358.338	246.238	736.831	271.853	-223.159	680.861	689.346	-161.824	740.316	421.661	-80.2396	754.839	436.646	-89.0071	763.128	340.336	-54.6425	733.518	255.949
95	0.94	82.7455	1172.2	583.462	147.569	1176.52	637.696	5.55356	1162.96	618.169	210.025	1030.02	759.444	-92.6809	1023.91	737.562	73.4825	966.324	641.574	347.3	691.492	717.123	339.27	742.776	438.933	257.032	750.896	453.695	270.3	756.602	358.347	246.275	736.825	271.857	-223.145	680.85	689.347	-161.788	740.314	421.682	-80.2229	754.846	436.638	-88.9839	763.145	340.301	-54.5963	733.452	256.083
96	0.95	82.7846	1172.2	583.509	147.607	1176.52	637.705	5.6003	1162.94	618.157	210.044	1030.01	759.408	-92.5877	1023.82	737.442	73.543	966.301	641.586	347.273	691.446	717.099	339.314	742.77	438.932	257.078	750.916	453.682	270.353	756.597	358.374	246.325	736.826	271.837	-223.135	680.848	689.389	-161.772	740.306	421.672	-80.1895	754.851	436.607	-88.9314	763.14	340.291	-54.5537	733.434	256.126
97	0.96	82.8182	1172.22	583.44	147.619	1176.52	637.684	5.63093	1162.93	618.136	210.054	1030	759.422	-92.4842	1023.73	737.268	73.5721	966.316	641.551	347.255	691.439	717.119	339.342	742.771	438.937	257.114	750.935	453.716	270.383	756.623	358.379	246.354	736.833	271.817	-223.135	680.88	689.438	-161.767	740.314	421.66	-80.1505	754.854	436.598	-88.8923	763.132	340.339	-54.5276	733.429	256.125
98	0.97	82.8232	1172.24	583.415	147.614	1176.53	637.724	5.64579	1162.94	618.111	210.05	1030	759.401	-92.6174	1023.87	737.469	73.5736	966.267	641.581	347.229	691.446	717.133	339.342	742.779	438.957	257.132	750.946	453.733	270.378	756.634	358.363	246.355	736.831	271.805	-223.152	680.885	689.454	-161.756	740.326	421.656	-80.1435	754.854	436.592	-88.8909	763.127	340.364	-54.5391	733.471	256.068
99	0.98	82.8167	1172.23	583.471	147.603	1176.51	637.74	5.61975	1162.93	618.142	210.021	1030.01	759.424	-92.6672	1023.91	737.515	73.5685	966.2	641.701	347.207	691.463	717.13	339.325	742.777	438.975	257.111	750.937	453.729	270.367	756.627	358.395	246.341	736.825	271.797	-223.178	680.875	689.429	-161.76	740.33	421.673	-80.1688	754.854	436.626	-88.8899	763.107	340.419	-54.5668	733.504	256.002
100	0.99	82.805	1172.23	583.521	147.596	1176.51	637.739	5.59867	1162.93	618.158	209.993	1030	759.421	-92.683	1023.94	737.524	73.5451	966.191	641.76	347.179	691.479	717.128	339.291	742.786	438.957	257.079	750.926	453.746	270.35	756.632	358.399	246.311	736.838	271.786	-223.209	680.882	689.393	-161.768	740.326	421.675	-80.186	754.837	436.618	-88.9114	763.095	340.434	-54.5692	733.468	256.042
101	1	82.7991	1172.22	583.55	147.576	1176.52	637.701	5.59399	1162.95	618.14	209.987	1030	759.402	-92.6908	1023.93	737.505	73.5333	966.2	641.712	347.169	691.492	717.141	339.282	742.792	438.94	257.066	750.91	453.732	270.33	756.639	358.359	246.296	736.847	271.79	-223.226	680.862	689.344	-161.766	740.328	421.658	-80.1907	754.837	436.62	-88.9371	763.119	340.357	-54.5935	733.514	255.966
102	1.01	82.8078	1172.21	583.57	147.583	1176.51	637.684	5.58828	1162.97	618.134	210.002	1030.01	759.397	-92.6894	1023.93	737.508	73.5421	966.194	641.697	347.166	691.477	717.136	339.287	742.789	438.958	257.078	750.915	453.729	270.338	756.641	358.367	246.307	736.835	271.804	-223.232	680.863	689.347	-161.768	740.314	421.669	-80.1876	754.844	436.624	-88.9375	763.112	340.369	-54.5596	733.452	256.1
103	1.02	82.8259	1172.22	583.559	147.621	1176.53	637.718	5.60191	1162.97	618.102	210.005	1030	759.399	-92.6691	1023.93	737.49	73.5629	966.213	641.661	347.168	691.442	717.092	339.304	742.796	438.965	257.087	750.932	453.728	270.368	756.643	358.392	246.323	736.821	271.795	-223.237	680.881	689.357	-161.773	740.312	421.651	-80.1857	754.853	436.6	-88.9174	763.113	340.392	-54.5633	733.484	256.072
104	1.03	82.8469	1172.27	583.492	147.642	1176.54	637.723	5.63984	1162.97	618.086	210.019	1030	759.389	-92.6494	1023.93	737.464	73.5777	966.24	641.579	347.196	691.438	717.071	339.317	742.805	438.958	257.085	750.962	453.695	270.379	756.647	358.385	246.327	736.825	271.784	-223.224	680.897	689.342	-161.774	740.326	421.617	-80.1726	754.849	436.59	-88.8902	763.122	340.393	-54.5701	733.533	255.976
105	1.04	82.8702	1172.27	583.454	147.668	1176.54	637.708	5.66417	1162.97	618.087	210.024	1030.01	759.385	-92.6359	1023.95	737.443	73.5926	966.237	641.567	347.216	691.454	717.064	339.325	742.817	438.953	257.091	750.992	453.682	270.395	756.666	358.396	246.339	736.84	271.768	-223.209	680.921	689.324	-161.766	740.33	421.63	-80.1665	754.849	436.596	-88.8923	763.134	340.332	-54.5403	733.457	256.122
106	1.05	82.8892	1172.25	583.473	147.683	1176.54	637.699	5.67487	1162.95	618.08	210.011	1030.01	759.4	-92.633	1023.94	737.447	73.599	966.211	641.61	347.22	691.465	717.074	339.324	742.811	438.938	257.085	750.995	453.674	270.391	756.677	358.391	246.34	736.84	271.757	-223.239	680.936	689.307	-161.767	740.317	421.633	-80.1684	754.833	436.625	-88.9015	763.127	340.359	-54.5482	733.471	256.054
107	1.06	82.903	1172.22	583.475	147.656	1176.52	637.704	5.67231	1162.93	618.076	209.984	1029.99	759.404	-92.647	1023.92	737.422	73.5933	966.171	641.666	347.218	691.456	717.069	339.3	742.795	438.908	257.06	750.99	453.612	270.371	756.666	358.353	246.328	736.835	271.733	-223.301	680.945	689.334	-161.789	740.3	421.653	-80.1988	754.816	436.623	-88.9022	763.093	340.402	-54.5704	733.5	255.961
108	1.07	82.8821	1172.19	583.425	147.63	1176.5	637.706	5.64899	1162.92	618.094	209.949	1029.97	759.421	-92.6734	1023.92	737.428	73.5598	966.128	641.694	347.215	691.446	717.067	339.273	742.787	438.9	257.035	750.966	453.581	270.343	756.647	358.339	246.292	736.831	271.706	-223.348	680.926	689.32	-161.814	740.278	421.671	-80.2364	754.807	436.626	-88.9349	763.061	340.401	-54.5907	733.456	256.027
109	1.08	82.8519	1172.18	583.477	147.619	1176.49	637.723	5.62836	1162.92	618.108	209.91	1029.96	759.434	-92.6966	1023.92	737.444	73.5244	966.117	641.705	347.209	691.475	717.104	339.246	742.791	438.925	256.982	750.97	453.56	270.31	756.66	358.368	246.267	736.837	271.724	-223.37	680.899	689.285	-161.821	740.283	421.694	-80.2499	754.803	436.644	-88.9742	763.056	340.37	-54.65	733.538	255.883
110	1.09	82.8517	1172.19	583.549	147.623	1176.49	637.744	5.62846	1162.93	618.075	209.89	1029.96	759.444	-92.7076	1023.93	737.419	73.5208	966.154	641.694	347.221	691.5	717.112	339.254	742.801	438.95	256.972	750.998	453.578	270.305	756.685	358.358	246.269	736.84	271.756	-223.378	680.904	689.245	-161.841	740.303	421.675	-80.261	754.814	436.654	-88.9905	763.073	340.355	-54.6646	733.569	255.839
111	1.1	82.918	1172.21	583.492	147.663	1176.52	637.762	5.67753	1162.96	618.004	209.92	1029.97	759.404	-92.6186	1023.88	737.26	73.5587	966.183	641.695	347.226	691.487	717.065	339.296	742.827	438.937	257.047	751.041	453.614	270.364	756.717	358.361	246.336	736.868	271.733	-223.362	680.948	689.263	-161.828	740.334	421.637	-80.2429	754.857	436.648	-88.9524	763.111	340.355	-54.6088	733.546	255.892
112	1.11	83.0077	1172.26	583.373	147.736	1176.53	637.767	5.76934	1162.97	617.955	209.975	1029.96	759.384	-92.4805	1023.8	737.08	73.6254	966.196	641.654	347.227	691.458	717.052	339.372	742.827	438.919	257.15	751.084	453.62	270.46	756.732	358.384	246.408	736.883	271.718	-223.331	680.965	689.282	-161.78	740.348	421.59	-80.1737	754.89	436.589	-88.8905	763.16	340.299	-54.5428	733.505	255.98
113	1.12	83.0526	1172.29	583.372	147.766	1176.54	637.769	5.8368	1162.96	617.966	210.014	1029.92	759.404	-92.5739	1023.92	737.316	73.6738	966.171	641.625	347.235	691.434	717.046	339.432	742.816	438.914	257.215	751.154	453.573	270.515	756.74	358.389	246.451	736.874	271.728	-223.304	680.984	689.32	-161.75	740.35	421.602	-80.1403	754.898	436.554	-88.8454	763.163	340.311	-54.5266	733.584	255.857
114	1.13	83.0679	1172.3	583.444	147.773	1176.55	637.792	5.83764	1162.97	617.977	210.024	1029.88	759.428	-92.5939	1023.95	737.406	73.6822	966.117	641.698	347.246	691.429	717.017	339.465	742.808	438.92	257.243	751.231	453.565	270.526	756.769	358.385	246.47	736.88	271.728	-223.301	680.973	689.31	-161.754	740.349	421.594	-80.1397	754.892	436.574	-88.843	763.16	340.33	-54.5264	733.554	255.922
115	1.14	83.0679	1172.3	583.473	147.77	1176.56	637.825	5.81555	1162.97	618.031	210.016	1029.85	759.362	-92.6007	1023.97	737.405	73.6849	966.099	641.722	347.275	691.427	716.957	339.503	742.793	438.903	257.279	751.316	453.558	270.551	756.821	358.371	246.483	736.885	271.717	-223.315	680.965	689.269	-161.381	739.932	422.189	-80.1554	754.877	436.614	-88.8452	763.063	340.416	-54.5377	733.498	255.996
116	1.15	83.034	1172.31	583.471	147.744	1176.57	637.845	5.79244	1162.97	618.075	209.997	1029.84	759.338	-92.6109	1023.99	737.379	73.6648	966.067	641.739	347.312	691.449	716.947	339.544	742.769	438.83	257.33	751.445	453.459	270.608	756.89	358.371	246.492	736.914	271.68	-223.342	680.959	689.202	-160.921	739.411	422.897	-80.1909	754.863	436.623	-88.867	762.974	340.433	-54.5869	733.525	255.931
117	1.16	83.001	1172.32	583.519	147.714	1176.59	637.848	5.76562	1162.98	618.092	209.974	1029.82	759.3	-92.6253	1024	737.365	73.6495	966.035	641.773	347.342	691.487	716.95	339.612	742.737	438.722	257.416	751.612	453.373	270.692	756.963	358.374	246.53	736.958	271.621	-223.38	680.956	689.156	-161.581	740.115	421.922	-80.2131	754.851	436.636	-88.9112	763.105	340.368	-54.5982	733.482	255.988
118	1.17	83.0248	1172.3	583.676	147.709	1176.59	637.836	5.77393	1162.98	618.124	209.958	1029.78	759.261	-92.6295	1024.01	737.37	73.6578	966.016	641.779	347.364	691.505	716.956	339.706	742.701	438.603	257.518	751.766	453.301	270.793	757.037	358.342	246.582	736.99	271.543	-223.4	680.972	689.18	-161.738	740.278	421.692	-80.2016	754.842	436.637	-88.8924	763.075	340.447	-54.6097	733.548	255.839
119	1.18	83.0371	1172.33	583.652	147.727	1176.61	637.865	5.79227	1162.99	618.145	209.939	1029.75	759.242	-92.6088	1024.02	737.371	73.6725	966.007	641.798	347.413	691.539	716.976	339.811	742.665	438.52	257.621	751.928	453.242	270.938	757.129	358.379	246.664	737.024	271.454	-223.39	681.018	689.215	-161.772	740.314	421.626	-80.1907	754.839	436.588	-88.8717	763.067	340.41	-54.5798	733.548	255.822
120	1.19	83.0181	1172.41	583.618	147.722	1176.66	637.892	5.7673	1163.07	618.172	209.922	1029.74	759.245	-92.5964	1024.05	737.403	73.6548	966.068	641.789	347.496	691.587	717.037	339.91	742.654	438.476	257.749	752.15	453.225	271.058	757.246	358.4	246.803	737.096	271.419	-223.38	681.086	689.253	-161.787	740.355	421.586	-80.1873	754.871	436.602	-88.8707	763.113	340.349	-54.5593	733.529	255.906
121	1.2	82.9932	1172.5	583.659	147.71	1176.73	637.913	5.76288	1163.15	618.183	209.913	1029.74	759.251	-92.5896	1024.1	737.399	73.6283	966.138	641.771	347.575	691.616	717.047	340	742.658	438.423	257.808	752.492	453.194	271.179	757.385	358.394	247.217	737.159	271.434	-223.38	681.141	689.259	-161.789	740.401	421.601	-80.198	754.918	436.637	-88.8829	763.154	340.342	-54.5603	733.517	256.013
122	1.21	82.9849	1172.55	583.677	147.713	1176.79	637.945	5.75593	1163.21	618.178	209.923	1029.72	759.214	-92.5762	1024.14	737.374	73.6306	966.191	641.743	347.631	691.63	717.043	340.106	742.66	438.348	257.818	752.936	453.013	271.019	757.814	357.863	247.978	737.166	271.448	-223.36	681.177	689.225	-161.788	740.413	421.574	-80.193	754.913	436.625	-88.8767	763.152	340.369	-54.5777	733.603	255.86
123	1.22	82.9906	1172.59	583.717	147.716	1176.8	637.961	5.73932	1163.27	618.192	209.923	1029.68	759.161	-92.5592	1024.17	737.402	73.6337	966.21	641.689	347.669	691.616	717.039	340.213	742.657	438.265	257.943	753.207	452.975	270.464	758.602	356.642	248.524	737.197	271.364	-223.367	681.206	689.264	-161.777	740.403	421.587	-80.1755	754.908	436.581	-88.8791	763.14	340.348	-54.5698	733.601	255.817
124	1.23	82.9624	1172.64	583.765	147.701	1176.84	637.983	5.71281	1163.29	618.242	209.935	1029.63	759.156	-92.5523	1024.19	737.461	73.5926	966.251	641.637	347.696	691.581	717.043	340.311	742.651	438.21	258.131	753.481	453.052	270.414	758.898	356.25	248.788	737.288	271.36	-223.395	681.21	689.297	-161.791	740.396	421.627	-80.1761	754.904	436.599	-88.8896	763.129	340.334	-54.5689	733.552	255.899
125	1.24	82.9141	1172.71	583.802	147.652	1176.89	637.999	5.67378	1163.33	618.276	209.936	1029.58	759.095	-92.553	1024.21	737.465	73.5618	966.24	641.7	347.7	691.535	717.012	340.421	742.648	438.155	258.338	753.791	453.098	270.496	759.147	356.049	248.899	737.497	271.372	-223.428	681.225	689.275	-161.815	740.4	421.592	-80.2122	754.894	436.612	-88.9062	763.14	340.291	-54.5765	733.503	255.987
126	1.25	82.8533	1172.79	583.888	147.625	1176.95	638.021	5.64392	1163.38	618.313	209.964	1029.53	759.002	-92.5468	1024.25	737.469	73.5718	966.181	641.763	347.693	691.47	716.97	340.549	742.671	438.098	258.543	754.139	453.103	270.65	759.464	355.905	249.036	737.888	271.379	-223.442	681.28	689.241	-161.839	740.417	421.561	-80.2515	754.904	436.623	-88.9058	763.13	340.355	-54.5979	733.529	255.944
127	1.26	82.8214	1172.85	584.024	147.618	1177.02	638.027	5.63981	1163.43	618.363	210.02	1029.48	758.878	-92.5203	1024.31	737.487	73.5807	966.153	641.778	347.686	691.374	716.912	340.735	742.71	438.043	258.791	754.573	453.013	270.897	759.881	355.867	249.259	738.44	271.308	-223.427	681.373	689.277	-161.841	740.445	421.566	-80.2496	754.93	436.618	-88.8956	763.127	340.406	-54.5701	733.497	256.039
128	1.27	82.7996	1172.96	584.026	147.624	1177.09	637.99	5.63307	1163.52	618.369	210.094	1029.41	758.709	-92.4824	1024.37	737.526	73.5941	966.141	641.745	347.651	691.256	716.857	340.986	742.781	437.993	259.081	755.085	452.89	271.595	760.037	356.478	249.57	739.017	271.168	-223.426	681.468	689.349	-161.817	740.454	421.6	-80.2144	754.957	436.61	-88.871	763.149	340.376	-54.5654	733.574	255.9
129	1.28	82.7425	1173.12	583.842	147.634	1177.15	637.956	5.64536	1163.6	618.291	210.151	1029.31	758.522	-92.4534	1024.41	737.513	73.6126	966.164	641.66	347.575	691.101	716.787	341.23	742.883	437.913	259.373	755.631	452.799	272.79	759.826	357.719	249.977	739.523	271.064	-223.427	681.517	689.377	-161.791	740.458	421.567	-80.1871	754.992	436.569	-88.8514	763.185	340.305	-54.5485	733.6	255.83
130	1.29	82.6645	1173.24	583.737	147.624	1177.2	637.949	5.6367	1163.64	618.278	210.201	1029.22	758.367	-92.4263	1024.45	737.48	73.5912	966.133	641.608	347.444	690.899	716.707	341.454	743.012	437.876	259.653	756.222	452.806	273.376	760.187	357.974	250.379	740.093	271.069	-223.43	681.548	689.398	-161.784	740.451	421.562	-80.1807	755.003	436.544	-88.8365	763.19	340.308	-54.5387	733.585	255.901
131	1.3	82.5943	1173.32	583.738	147.576	1177.25	637.885	5.59165	1163.68	618.324	210.226	1029.13	758.214	-92.3973	1024.5	737.475	73.5489	966.098	641.648	347.275	690.701	716.681	341.697	743.177	437.901	259.94	756.823	452.885	273.773	760.792	357.936	250.746	740.793	271.185	-223.417	681.589	689.403	-161.796	740.469	421.601	-80.2053	755.002	436.59	-88.86	763.172	340.358	-54.5161	733.49	256.124
132	1.31	82.4871	1173.4	583.68	147.512	1177.28	637.781	5.5285	1163.71	618.346	210.261	1029.03	758.068	-92.3709	1024.55	737.458	73.5148	966.085	641.648	347.051	690.478	716.586	341.979	743.401	437.949	260.267	757.584	452.804	274.201	761.608	357.871	251.089	741.682	271.15	-223.416	681.615	689.378	-161.82	740.479	421.628	-80.255	754.995	436.625	-88.894	763.159	340.367	-54.5527	733.515	256.088
133	1.32	82.3884	1173.49	583.514	147.473	1177.32	637.689	5.47261	1163.74	618.345	210.298	1028.94	757.927	-92.3495	1024.6	737.417	73.5039	966.093	641.571	346.754	690.2	716.429	342.297	743.708	437.977	260.71	758.531	452.675	274.769	762.583	357.803	251.462	742.846	270.815	-223.432	681.643	689.354	-161.825	740.479	421.65	-80.2849	754.991	436.633	-88.9077	763.152	340.376	-54.6085	733.61	255.915
134	1.33	82.3307	1173.58	583.383	147.464	1177.38	637.604	5.43521	1163.76	618.329	210.336	1028.86	757.816	-92.3116	1024.65	737.378	73.4996	966.101	641.485	346.422	689.916	716.325	342.633	744.092	437.977	261.204	759.584	452.668	275.511	763.721	357.765	252.018	744.196	270.708	-223.434	681.682	689.351	-161.82	740.471	421.69	-80.2779	754.988	436.637	-88.9064	763.184	340.325	-54.6011	733.578	255.946
135	1.34	82.2764	1173.68	583.238	147.458	1177.46	637.479	5.4063	1163.79	618.304	210.395	1028.8	757.727	-92.2645	1024.68	737.302	73.512	966.103	641.391	346.034	689.626	716.191	342.651	744.159	438.187	261.849	760.902	452.558	276.32	765.13	357.534	252.776	745.763	270.567	-223.443	681.746	689.4	-161.843	740.486	421.657	-80.2772	755.002	436.63	-88.9064	763.212	340.25	-54.5737	733.498	256.088
136	1.35	82.2426	1173.74	583.101	147.444	1177.53	637.358	5.38789	1163.82	618.249	210.441	1028.74	757.62	-92.2208	1024.73	737.185	73.5436	966.069	641.313	345.582	689.356	716.034	342.313	743.838	438.751	262.577	762.478	452.234	277.227	766.685	357.369	253.668	747.681	270.245	-223.457	681.82	689.442	-161.871	740.489	421.618	-80.2884	755.015	436.627	-88.9224	763.238	340.184	-54.5895	733.531	256.017
137	1.36	82.2478	1173.75	583.1	147.448	1177.59	637.261	5.38751	1163.85	618.208	210.498	1028.66	757.556	-92.1757	1024.77	737.074	73.6007	965.986	641.35	345.068	689.134	715.889	342.649	744.147	438.829	263.348	764.347	452.043	278.307	768.519	357.232	254.682	749.905	270.036	-223.488	681.914	689.451	-161.881	740.483	421.593	-80.3143	755.006	436.639	-88.9195	763.213	340.245	-54.6353	733.605	255.864
138	1.37	82.2716	1173.71	583.215	147.474	1177.62	637.177	5.39599	1163.84	618.24	210.557	1028.59	757.566	-92.1151	1024.81	736.983	73.6602	965.891	641.429	344.589	688.947	715.758	343.109	744.701	438.856	264.215	766.376	451.974	279.492	770.739	357.204	255.772	752.401	269.881	-223.499	681.99	689.454	-161.899	740.466	421.607	-80.3264	755.001	436.655	-88.9051	763.116	340.397	-54.6208	733.547	255.956
139	1.38	82.3216	1173.66	583.246	147.529	1177.65	637.076	5.45121	1163.83	618.204	210.606	1028.52	757.567	-92.0432	1024.84	736.878	73.7386	965.84	641.43	344.162	688.741	715.536	343.514	745.447	438.879	265.03	768.621	452.052	280.583	773.31	357.178	256.788	755.365	269.805	-223.519	682.043	689.45	-161.903	740.456	421.612	-80.3125	754.999	436.664	-88.8757	763.025	340.578	-54.5817	733.477	256.059
140	1.39	82.359	1173.71	583.049	147.606	1177.67	636.932	5.51089	1163.83	618.063	210.659	1028.46	757.559	-91.9721	1024.85	736.772	73.8132	965.827	641.339	343.77	688.527	715.213	343.848	746.391	438.882	265.929	771.16	452.068	281.524	776.143	357.256	257.395	758.906	269.651	-223.563	682.074	689.419	-161.872	740.458	421.581	-80.2801	755.02	436.606	-88.8702	763.05	340.504	-54.5759	733.551	255.908
141	1.4	82.4107	1173.8	582.797	147.696	1177.67	636.819	5.5706	1163.86	617.902	210.692	1028.42	757.577	-91.9124	1024.89	736.654	73.8885	965.848	641.232	343.42	688.335	714.788	344.179	747.587	438.4	266.919	774.081	451.891	282.482	779.437	356.959	257.602	762.876	269.652	-223.587	682.115	689.382	-161.837	740.475	421.521	-80.2414	755.063	436.533	-88.8486	763.144	340.363	-54.5394	733.592	255.844
142	1.41	82.4671	1173.89	582.527	147.742	1177.69	636.683	5.63449	1163.89	617.793	210.697	1028.41	757.648	-91.8724	1024.95	736.536	73.9276	965.952	641.084	343.129	688.188	714.301	344.449	748.988	437.274	267.429	777.041	452.071	283.376	783.096	356.24	257.289	767.366	269.853	-223.621	682.16	689.357	-161.818	740.531	421.495	-80.2322	755.112	436.535	-88.8442	763.241	340.272	-54.5118	733.635	255.836
143	1.42	82.5433	1173.96	582.295	147.803	1177.71	636.546	5.70954	1163.9	617.659	210.707	1028.4	757.713	-91.8492	1025	736.405	73.957	966.044	640.958	342.919	688.081	713.703	344.237	750.392	436.796	267.904	780.175	452.431	283.716	786.734	356.202	256.618	772.313	270.08	-223.688	682.233	689.361	-161.819	740.595	421.482	-80.2516	755.143	436.52	-88.8465	763.321	340.146	-54.5005	733.625	255.884
144	1.43	82.6892	1173.94	582.206	147.919	1177.69	636.468	5.82963	1163.91	617.538	210.72	1028.36	757.773	-91.8055	1025.02	736.295	74.0234	966.031	640.981	342.794	687.992	713.006	343.789	751.948	436.353	268.243	783.456	452.755	283.9	790.582	356.325	255.691	777.633	270.403	-223.722	682.281	689.303	-161.833	740.61	421.475	-80.2604	755.138	436.508	-88.8244	763.309	340.117	-54.478	733.539	256.033
145	1.44	82.9156	1173.83	582.328	148.076	1177.64	636.457	6.00001	1163.88	617.46	210.755	1028.31	757.914	-91.7361	1025.02	736.243	74.1395	965.944	641.073	342.709	687.997	712.303	343.206	753.563	435.916	268.509	786.883	453.205	283.984	794.62	356.616	254.696	783.219	270.994	-223.762	682.325	689.299	-161.838	740.574	421.466	-80.262	755.099	436.582	-88.7832	763.22	340.272	-54.4733	733.514	256.017
146	1.45	83.1632	1173.7	582.484	148.231	1177.59	636.437	6.19948	1163.82	617.366	210.79	1028.27	758.065	-91.6831	1025.01	736.21	74.2284	965.902	641.096	342.636	688.076	711.559	342.418	755.321	435.519	268.805	790.514	453.709	283.896	798.773	357.055	253.652	789.079	271.565	-223.789	682.399	689.377	-161.842	740.539	421.496	-80.2645	755.072	436.601	-88.763	763.122	340.434	-54.4902	733.544	255.894
147	1.46	83.4319	1173.63	582.574	148.377	1177.56	636.353	6.4198	1163.76	617.226	210.792	1028.25	758.143	-91.6209	1025	736.176	74.3008	965.885	641.039	342.606	688.135	710.737	341.493	757.153	435.027	269.069	794.35	454.233	283.811	803.233	357.424	252.378	795.153	272.249	-223.778	682.438	689.376	-161.847	740.518	421.439	-80.2562	755.066	436.571	-88.7651	763.067	340.484	-54.4741	733.488	255.922
148	1.47	83.6462	1173.65	582.547	148.515	1177.54	636.314	6.62229	1163.77	617.106	210.771	1028.25	758.216	-91.5825	1025.02	736.147	74.3449	965.9	640.966	342.651	688.177	709.824	340.434	759.083	434.464	269.39	798.459	454.749	283.666	808.107	358.434	250.923	801.821	273.125	-223.77	682.469	689.381	-161.857	740.518	421.423	-80.2575	755.101	436.559	-88.7929	763.063	340.46	-54.4627	733.427	255.982
149	1.48	83.8087	1173.72	582.517	148.639	1177.58	636.313	6.74304	1163.84	616.967	210.739	1028.26	758.312	-91.5783	1025.04	736.116	74.3613	965.909	641.004	342.757	688.277	708.841	339.076	761.111	433.816	269.739	802.751	455.308	283.423	813.218	360.141	249.202	808.938	274.279	-223.769	682.455	689.382	-161.893	740.526	421.436	-80.3041	755.132	436.572	-88.8549	763.093	340.441	-54.5192	733.487	255.919
150	1.49	83.9105	1173.84	582.293	148.728	1177.63	636.318	6.82368	1163.92	616.81	210.698	1028.27	758.362	-91.5912	1025.06	736.139	74.3187	965.948	641.005	342.853	688.447	707.829	337.455	763.175	433.05	270.125	807.281	456.123	283.196	818.242	361.1	247.314	816.086	275.207	-223.778	682.432	689.397	-161.944	740.541	421.437	-80.3778	755.155	436.543	-88.9231	763.194	340.293	-54.5545	733.498	255.968
151	1.5	84.0208	1174.01	582.01	148.842	1177.66	636.324	6.91118	1164.01	616.652	210.669	1028.28	758.391	-91.5927	1025.06	736.166	74.2848	966.022	640.95	342.96	688.594	706.784	335.618	765.305	432.441	270.667	812.153	457.119	282.951	823.327	361.994	245.484	823.591	276.327	-223.762	682.371	689.384	-161.965	740.557	421.445	-80.4201	755.197	436.501	-88.9631	763.283	340.119	-54.5947	733.562	255.884
152	1.51	84.1728	1174.11	581.945	148.967	1177.69	636.372	7.05712	1164.07	616.531	210.659	1028.31	758.465	-91.5741	1025.06	736.198	74.2881	966.062	640.92	343.134	688.774	705.676	333.629	767.624	431.966	271.149	817.156	457.984	282.536	828.54	362.901	243.688	831.242	277.828	-223.698	682.324	689.364	-161.958	740.581	421.48	-80.4181	755.204	436.559	-88.9529	763.323	340.099	-54.5709	733.551	255.949
153	1.52	84.3399	1174.18	581.977	149.091	1177.73	636.409	7.2109	1164.12	616.459	210.653	1028.33	758.52	-91.5366	1025.06	736.237	74.3037	966.092	640.925	343.285	689.015	704.552	331.45	770.131	431.316	271.525	821.842	458.784	282.027	833.709	363.764	241.684	838.91	279.634	-223.626	682.366	689.451	-161.934	740.597	421.521	-80.386	755.195	436.597	-88.9175	763.324	340.158	-54.5767	733.641	255.856
154	1.53	84.5311	1174.19	582.043	149.225	1177.78	636.425	7.38027	1164.14	616.396	210.655	1028.36	758.54	-91.4871	1025.05	736.244	74.3654	966.093	640.944	343.439	689.25	703.293	329.105	772.775	430.547	272.013	826.612	459.88	281.385	839.254	365.038	239.476	847.126	282.028	-223.557	682.407	689.496	-161.893	740.583	421.505	-80.3304	755.174	436.561	-88.859	763.266	340.238	-54.5476	733.618	255.907
155	1.54	84.7223	1174.16	582.191	149.358	1177.8	636.483	7.54194	1164.11	616.403	210.665	1028.38	758.586	-91.4284	1025.03	736.245	74.4308	966.064	640.949	343.61	689.534	702.041	326.727	775.643	430.115	272.4	831.474	460.955	280.414	844.872	366.51	237.186	855.826	285.002	-223.449	682.365	689.479	-161.854	740.544	421.502	-80.272	755.136	436.548	-88.8261	763.201	340.298	-54.5038	733.533	256.009
156	1.55	84.846	1174.13	582.312	149.444	1177.83	636.562	7.68058	1164.08	616.448	210.646	1028.38	758.647	-91.3821	1025	736.272	74.4695	966.041	641.061	343.764	689.816	700.758	324.258	778.758	429.846	272.531	836.266	462.203	279.287	850.413	368.075	234.908	863.851	287.197	-223.355	682.312	689.537	-161.849	740.507	421.577	-80.2727	755.112	436.597	-88.8265	763.127	340.457	-54.5387	733.554	255.889
157	1.56	84.933	1174.16	582.313	149.489	1177.85	636.559	7.76084	1164.09	616.419	210.618	1028.4	758.671	-91.3649	1024.99	736.285	74.4768	966.039	641.104	343.917	690.056	699.331	321.696	782.161	429.572	272.481	841.022	463.645	278.005	855.802	369.497	232.554	871.648	289.341	-223.26	682.232	689.567	-161.876	740.473	421.579	-80.2827	755.089	436.574	-88.8602	763.08	340.509	-54.5915	733.554	255.812
158	1.57	84.9829	1174.25	582.296	149.53	1177.89	636.544	7.79214	1164.14	616.393	210.595	1028.43	758.685	-91.349	1024.97	736.304	74.4725	966.055	641.158	344.069	690.359	697.958	319.109	785.686	429.354	271.941	845.386	464.95	276.565	861.221	370.834	230.099	879.371	291.52	-223.148	682.197	689.647	-161.889	740.463	421.582	-80.3031	755.086	436.569	-88.9069	763.085	340.488	-54.6379	733.575	255.795
159	1.58	84.9665	1174.41	582.225	149.553	1177.96	636.535	7.77684	1164.25	616.359	210.552	1028.49	758.742	-91.3438	1024.98	736.352	74.4273	966.095	641.199	344.265	690.677	696.518	316.089	789.394	429.243	270.831	849.202	465.777	274.989	866.677	372.276	227.544	887.087	293.904	-223.02	682.142	689.722	-161.904	740.464	421.601	-80.3321	755.115	436.58	-88.966	763.128	340.425	-54.6855	733.613	255.779
160	1.59	84.9591	1174.62	582.079	149.577	1178.05	636.526	7.76091	1164.39	616.283	210.512	1028.54	758.77	-91.341	1025.02	736.428	74.3733	966.192	641.118	344.47	691.021	695.155	312.628	793.106	429.396	269.934	853.439	467.108	273.285	872.122	373.979	224.863	894.901	296.605	-222.871	682.077	689.757	-161.908	740.492	421.622	-80.3517	755.152	436.565	-89.0289	763.224	340.269	-54.7306	733.652	255.789
161	1.6	84.9701	1174.84	581.901	149.621	1178.14	636.524	7.78733	1164.52	616.201	210.485	1028.57	758.783	-91.3236	1025.04	736.48	74.3414	966.316	640.978	344.742	691.363	693.701	309.444	796.849	429.49	269.137	857.724	468.782	271.49	877.597	375.879	222.089	902.851	299.619	-222.741	682.025	689.804	-161.882	740.504	421.628	-80.3306	755.186	436.548	-89.0265	763.313	340.165	-54.7256	733.687	255.799
162	1.61	84.986	1175.07	581.794	149.646	1178.22	636.536	7.8032	1164.64	616.183	210.454	1028.59	758.806	-91.3083	1025.04	736.545	74.3451	966.378	640.906	345.025	691.736	692.375	306.193	800.647	429.672	268.363	862.04	470.641	269.628	883.011	377.902	219.294	910.808	302.785	-222.63	681.983	689.878	-161.853	740.496	421.661	-80.2846	755.191	436.532	-89.0031	763.371	340.121	-54.6885	733.667	255.898
163	1.62	84.9714	1175.28	581.713	149.664	1178.32	636.577	7.80963	1164.76	616.21	210.423	1028.62	758.82	-91.2965	1025.02	736.605	74.3323	966.415	640.893	345.364	692.154	690.956	302.797	804.591	430.142	267.653	866.375	472.568	267.706	888.382	380.002	216.472	918.702	306.21	-222.536	681.967	689.962	-161.835	740.498	421.708	-80.2592	755.177	436.543	-88.9772	763.372	340.141	-54.658	733.613	256.015
164	1.63	84.9736	1175.43	581.698	149.673	1178.42	636.554	7.8429	1164.85	616.181	210.417	1028.61	758.794	-91.2698	1025	736.629	74.3337	966.369	640.936	345.683	692.606	689.64	299.45	808.523	430.455	267.058	870.661	474.519	265.67	893.767	382.186	213.618	926.619	309.882	-222.466	681.949	690.006	-161.805	740.479	421.743	-80.2238	755.146	436.548	-88.9473	763.313	340.229	-54.6727	733.656	255.866
165	1.64	84.9921	1175.54	581.753	149.668	1178.51	636.46	7.85739	1164.9	616.175	210.404	1028.57	758.728	-91.2429	1024.96	736.627	74.3532	966.251	641.028	345.985	693.088	688.243	296.088	812.518	430.859	266.456	875.084	476.619	263.508	899.173	384.629	210.647	934.475	313.836	-222.41	681.905	690.007	-161.781	740.438	421.74	-80.1865	755.078	436.568	-88.9445	763.207	340.362	-54.6722	733.625	255.83
166	1.65	84.9519	1175.62	581.885	149.636	1178.61	636.375	7.81943	1164.95	616.187	210.36	1028.55	758.709	-91.2234	1024.92	736.63	74.3118	966.151	641.177	346.229	693.602	686.91	292.314	816.616	431.977	265.817	879.449	478.647	261.225	904.574	387.112	207.636	942.246	317.964	-222.393	681.843	690.043	-161.814	740.395	421.782	-80.2045	755.038	436.604	-88.9951	763.099	340.478	-54.6921	733.579	255.827
167	1.66	84.8672	1175.76	581.879	149.6	1178.69	636.277	7.78182	1165.01	616.189	210.309	1028.53	758.749	-91.2171	1024.89	736.655	74.2613	966.105	641.263	346.485	694.074	685.531	288.538	820.867	432.977	265.083	883.701	480.782	258.749	910.028	389.829	204.384	950.208	323.099	-222.344	681.775	690.069	-161.849	740.357	421.821	-80.2532	755.007	436.63	-89.0564	763.036	340.56	-54.7427	733.557	255.834
168	1.67	84.8072	1175.95	581.711	149.584	1178.78	636.153	7.76144	1165.09	616.092	210.271	1028.53	758.758	-91.2113	1024.89	736.658	74.2515	966.112	641.242	346.656	694.253	683.42	284.822	825.171	434.064	264.323	887.994	483.112	256.151	915.491	392.86	200.616	958.476	329.414	-222.275	681.734	690.093	-161.857	740.317	421.826	-80.2795	755.005	436.613	-89.1073	763.061	340.487	-54.7679	733.522	255.899
169	1.68	84.7678	1176.18	581.469	149.578	1178.91	635.958	7.75095	1165.2	615.971	210.233	1028.56	758.775	-91.2022	1024.94	736.661	74.231	966.2	641.181	346.617	694.008	680.306	281.162	829.651	435.153	263.701	892.378	485.682	253.277	920.93	395.648	197.065	966.216	334.568	-222.216	681.734	690.147	-161.873	740.328	421.805	-80.3125	755.044	436.616	-89.156	763.159	340.365	-54.7638	733.491	256.079
170	1.69	84.7361	1176.44	581.134	149.568	1179.08	635.76	7.73708	1165.34	615.844	210.169	1028.63	758.8	-91.1787	1025.01	736.663	74.208	966.366	641.048	346.622	694.464	678.187	277.471	834.236	436.309	263.206	896.699	488.331	250.072	926.397	398.402	193.839	973.861	339.788	-222.158	681.786	690.216	-161.88	740.376	421.797	-80.3495	755.124	436.613	-89.1706	763.286	340.234	-54.7653	733.544	256.129
171	1.7	84.743	1176.66	580.833	149.554	1179.21	635.492	7.76123	1165.44	615.673	210.134	1028.67	758.836	-91.1363	1025.06	736.63	74.2243	966.536	640.849	346.552	694.964	676.251	273.796	838.696	437.694	262.407	900.85	490.892	247.295	931.83	401.702	190.77	981.393	345.176	-222.134	681.846	690.267	-161.866	740.415	421.782	-80.3325	755.173	436.56	-89.146	763.407	340.072	-54.7691	733.634	256.04
172	1.71	84.792	1176.81	580.67	149.575	1179.29	635.267	7.80403	1165.5	615.473	210.096	1028.67	758.902	-91.0935	1025.06	736.608	74.278	966.582	640.754	346.598	695.475	674.363	270.095	843.108	439.142	261.486	904.828	493.439	244.621	937.133	405.112	187.763	988.772	350.746	-222.126	681.855	690.274	-161.82	740.388	421.791	-80.2696	755.173	436.499	-89.1034	763.425	340.017	-54.7614	733.728	255.85
173	1.72	84.7959	1176.87	580.656	149.599	1179.34	635.152	7.81152	1165.53	615.38	210.019	1028.62	758.97	-91.0892	1025.04	736.633	74.3062	966.481	640.93	346.717	696.061	672.695	266.361	847.56	440.735	260.502	908.708	496.009	241.937	942.357	408.693	184.84	996.019	356.676	-222.19	681.849	690.293	-161.807	740.336	421.836	-80.2522	755.113	436.575	-89.0657	763.308	340.201	-54.7356	733.67	255.905
174	1.73	84.7824	1176.92	580.664	149.601	1179.36	635.01	7.7727	1165.56	615.276	209.935	1028.55	759.042	-91.1058	1025.01	736.623	74.2807	966.323	641.177	346.863	696.659	670.941	262.554	852.037	442.471	259.472	912.539	498.738	239.237	947.496	412.415	181.883	1003.11	362.659	-222.287	681.813	690.194	-161.814	740.297	421.871	-80.2821	755.049	436.673	-89.0694	763.189	340.392	-54.7432	733.568	256.032
175	1.74	84.775	1176.99	580.615	149.606	1179.37	634.833	7.7618	1165.6	615.16	209.855	1028.49	759.064	-91.1151	1024.99	736.571	74.2406	966.182	641.312	347.066	697.282	668.891	258.746	856.312	444.649	258.519	916.245	501.466	236.569	952.541	416.146	179.027	1010.04	368.774	-222.371	681.819	690.14	-161.836	740.263	421.827	-80.3192	754.998	436.724	-89.0853	763.063	340.541	-54.7761	733.572	255.903
176	1.75	84.7966	1177.09	580.577	149.621	1179.4	634.656	7.76803	1165.66	615.064	209.778	1028.47	759.074	-91.1262	1024.99	736.494	74.2274	966.112	641.354	347.254	697.878	667.011	255.018	860.694	446.791	257.682	919.889	504.224	233.862	957.509	419.959	176.324	1016.78	375.111	-222.429	681.857	690.144	-161.854	740.254	421.819	-80.3392	754.968	436.736	-89.1208	762.98	340.645	-54.7712	733.522	255.981
177	1.76	84.8385	1177.28	580.445	149.655	1179.51	634.525	7.80416	1165.77	614.929	209.701	1028.48	759.106	-91.1224	1025.02	736.457	74.2251	966.141	641.334	347.402	698.426	665.094	251.336	865.22	448.812	256.816	923.531	507.091	231.161	962.414	424.05	173.543	1023.37	381.548	-222.453	681.867	690.114	-161.869	740.258	421.847	-80.3461	754.988	436.735	-89.1521	763.005	340.613	-54.7813	733.495	256.089
178	1.77	84.9021	1177.6	580.131	149.681	1179.63	634.355	7.87499	1165.92	614.692	209.631	1028.52	759.107	-91.125	1025.05	736.361	74.2105	966.223	641.165	347.47	699.04	663.066	247.607	869.633	451.585	255.854	927.164	510.201	228.572	967.359	428.239	170.85	1029.82	388.27	-222.46	681.897	690.142	-161.886	740.267	421.785	-80.3507	755.027	436.674	-89.1568	763.126	340.431	-54.8333	733.633	255.908
179	1.78	84.9385	1177.94	579.831	149.724	1179.77	634.246	7.94296	1166.08	614.475	209.558	1028.54	759.068	-91.1268	1025.09	736.277	74.2052	966.341	640.959	347.463	699.844	661.371	243.877	873.832	455.473	254.912	930.745	513.432	226.007	972.307	432.482	168.126	1036.15	395.106	-222.467	681.911	690.151	-161.907	740.289	421.747	-80.3666	755.086	436.622	-89.1665	763.262	340.201	-54.8142	733.649	255.922
180	1.79	84.9561	1178.28	579.632	149.768	1179.93	634.183	8.00102	1166.25	614.342	209.481	1028.58	759.085	-91.1329	1025.12	736.206	74.2355	966.447	641.092	347.557	700.625	659.645	240.408	878.146	458.586	254.02	934.19	516.609	223.472	977.184	436.896	165.355	1042.29	402.025	-222.468	681.93	690.187	-161.934	740.292	421.739	-80.4102	755.135	436.627	-89.1979	763.347	340.142	-54.7871	733.596	256.098
181	1.8	84.968	1178.55	579.459	149.801	1180.1	634.065	8.0623	1166.38	614.207	209.389	1028.63	759.066	-91.1325	1025.15	736.106	74.2952	966.387	641.382	347.68	701.356	657.669	237.241	882.323	461.809	253.148	937.52	519.858	220.963	981.926	441.442	162.671	1048.16	409.264	-222.496	681.919	690.102	-161.948	740.297	421.718	-80.4473	755.152	436.587	-89.2218	763.352	340.183	-54.8093	733.583	256.141
182	1.81	85.0124	1178.76	579.394	149.839	1180.25	633.903	8.14368	1166.48	614.042	209.28	1028.63	759.024	-91.1349	1025.17	736.009	74.3107	966.046	641.307	347.68	702.022	655.643	234.145	886.443	464.941	252.256	940.791	523.164	218.521	986.534	446.201	160.109	1053.8	416.58	-222.567	681.905	690.02	-161.957	740.282	421.662	-80.457	755.13	436.596	-89.2347	763.323	340.21	-54.8159	733.55	256.131
183	1.82	85.0789	1178.92	579.438	149.866	1180.39	633.809	8.20229	1166.55	613.999	209.177	1028.61	759.06	-91.1532	1025.14	735.941	74.3046	965.906	641.453	347.77	702.725	653.773	231.208	890.504	468.383	251.426	943.98	526.597	216.006	990.945	451.272	157.556	1059.29	423.84	-222.68	681.888	690.01	-161.955	740.23	421.666	-80.4617	755.055	436.665	-89.2382	763.239	340.297	-54.806	733.505	256.168
184	1.83	85.138	1179.1	579.486	149.92	1180.53	633.796	8.24658	1166.62	613.986	209.107	1028.58	759.161	-91.1698	1025.1	735.85	74.263	965.869	641.552	347.899	703.486	652.023	228.266	894.435	471.766	250.855	947.08	529.891	213.222	995.12	456.56	155.215	1064.55	431.364	-222.786	681.877	690.021	-161.963	740.177	421.735	-80.4785	755.006	436.72	-89.2326	763.107	340.456	-54.7996	733.464	256.18
185	1.84	85.219	1179.35	579.479	149.994	1180.7	633.776	8.318	1166.71	613.929	209.064	1028.56	759.225	-91.1473	1025.1	735.782	74.244	965.961	641.462	347.974	704.288	650.193	225.476	898.155	475.371	249.889	949.929	533.362	210.817	999.231	461.639	153.072	1069.61	438.876	-222.827	681.913	690.017	-161.953	740.166	421.766	-80.4783	754.989	436.726	-89.1899	763.037	340.546	-54.7645	733.422	256.202
186	1.85	85.3371	1179.64	579.452	150.089	1180.87	633.773	8.42896	1166.85	613.817	209.044	1028.57	759.294	-91.0907	1025.13	735.698	74.276	966.101	641.284	348.047	705.032	648.161	222.722	901.851	478.846	248.807	952.651	536.742	208.601	1003.15	466.641	151.005	1074.44	446.231	-222.827	681.989	689.998	-161.926	740.19	421.744	-80.4272	755.023	436.72	-89.1311	763.031	340.593	-54.7278	733.465	256.148
187	1.86	85.4356	1179.94	579.384	150.179	1181.06	633.79	8.54628	1167.02	613.675	209.022	1028.61	759.383	-91.045	1025.17	735.598	74.3562	966.186	641.217	348.094	705.808	646.264	219.971	905.399	482.364	248.126	955.34	539.946	206.337	1006.9	471.57	149.048	1079.03	453.5	-222.823	682.082	690.035	-161.906	740.228	421.701	-80.3709	755.052	436.691	-89.0729	763.078	340.565	-54.7515	733.579	256
188	1.87	85.4993	1180.25	579.255	150.223	1181.27	633.748	8.63655	1167.17	613.547	209	1028.72	759.522	-91.0305	1025.2	735.491	74.4688	966.226	641.217	348.167	706.661	644.59	217.233	908.779	485.891	247.331	957.878	543.146	204.028	1010.41	476.491	147.122	1083.42	460.89	-222.841	682.146	690.08	-161.898	740.238	421.633	-80.3598	755.073	436.621	-89.0692	763.179	340.386	-54.7721	733.593	256.101
189	1.88	85.5004	1180.55	579.106	150.211	1181.47	633.711	8.64909	1167.33	613.436	208.955	1028.69	759.563	-91.0298	1025.22	735.391	74.5536	966.193	641.274	348.44	707.388	642.683	214.455	911.936	489.322	246.441	960.254	546.322	201.73	1013.77	481.352	145.166	1087.62	468.038	-222.862	682.099	690.04	-161.93	740.234	421.635	-80.4003	755.104	436.58	-89.1316	763.264	340.231	-54.8719	733.578	256.285
190	1.89	85.4196	1180.85	578.996	150.165	1181.63	633.725	8.57446	1167.51	613.328	208.656	1028.26	759.393	-91.0654	1025.22	735.316	74.5554	966.129	641.46	348.701	707.994	640.646	211.707	914.972	492.829	245.484	962.444	549.495	199.426	1016.9	486.102	143.217	1091.12	475.1	-222.915	682.013	689.982	-162.029	740.238	421.641	-80.4985	755.132	436.609	-89.2595	763.299	340.203	-55.0617	733.577	256.463
191	1.9	85.3735	1181.14	579.039	150.104	1181.79	633.781	8.49973	1167.65	613.303	208.147	1028.47	759.902	-91.0905	1025.22	735.246	74.5471	966.079	641.658	348.8	708.808	638.949	209.071	917.764	496.259	244.555	964.522	552.616	197.218	1019.78	490.989	141.189	1094.42	481.852	-222.972	681.938	689.926	-162.107	740.238	421.67	-80.6044	755.133	436.662	-89.3803	763.322	340.203	-55.2481	733.436	256.99
192	1.91	85.4007	1181.37	579.174	150.101	1181.96	633.834	8.5135	1167.72	613.28	207.729	1028.93	760.678	-91.0649	1025.21	735.158	74.5851	966.094	641.771	348.902	709.598	637.22	206.648	920.251	499.934	243.761	966.577	555.543	195.067	1022.43	495.68	139.267	1097.45	488.601	-222.983	681.888	689.841	-162.119	740.202	421.648	-80.6355	755.086	436.691	-89.5876	763.548	339.451	-55.724	733.759	255.836
193	1.92	85.514	1181.53	579.363	150.159	1182.16	633.94	8.61643	1167.76	613.275	207.612	1029.34	761.401	-91.0102	1025.19	735.078	74.6412	966.16	641.684	348.956	710.293	635.607	204.363	922.533	503.467	243.14	968.66	558.143	193.046	1024.89	500.198	137.709	1100.1	495.213	-222.973	681.887	689.795	-162.064	740.157	421.651	-80.5801	755.028	436.671	-89.9761	764.156	337.543	-56.4679	734.559	252.695
194	1.93	85.67	1181.74	579.564	150.225	1182.35	634.11	8.74999	1167.81	613.314	208.031	1029.48	761.661	-90.943	1025.16	735.023	74.6845	966.283	641.529	349.02	710.944	634.042	202.209	924.696	506.936	242.363	970.279	560.876	191.146	1027.19	504.498	136.17	1102.44	501.261	-222.964	681.949	689.876	-162.007	740.146	421.665	-80.4863	754.993	436.666	-90.0027	764.331	336.925	-56.5774	734.727	251.946
195	1.94	85.8007	1182.05	579.706	150.262	1182.57	634.312	8.85892	1167.9	613.344	208.328	1029.51	761.693	-90.817	1025.05	734.866	74.731	966.423	641.379	349.039	711.693	632.743	200.089	926.767	510.135	241.532	971.724	563.651	189.421	1029.31	508.759	134.203	1104.82	507.424	-222.932	681.995	689.985	-161.97	740.152	421.703	-80.4265	754.994	436.7	-89.9576	764.254	337.047	-56.5411	734.736	251.824
196	1.95	85.8726	1182.42	579.74	150.3	1182.83	634.511	8.92118	1168.05	613.345	208.411	1029.57	761.823	-90.6786	1024.93	734.695	74.7817	966.515	641.287	348.989	712.34	631.235	198.135	928.701	513.29	240.73	973.055	566.196	187.769	1031.23	512.771	132.726	1107.03	513.059	-222.908	682.008	690.023	-161.948	740.172	421.673	-80.4061	755.02	436.711	-89.9362	764.256	337.106	-56.5306	734.769	251.755
197	1.96	85.8951	1182.77	579.804	150.31	1183.09	634.691	8.93387	1168.22	613.342	208.277	1029.61	762.012	-90.7059	1025	734.755	74.8616	966.559	641.368	348.898	712.696	629.486	196.237	930.508	516.002	239.985	974.303	568.596	186.23	1032.97	516.458	131.49	1109.03	518.283	-222.885	681.985	690.009	-161.944	740.181	421.672	-80.427	755.048	436.641	-89.947	764.291	337.068	-56.5696	734.852	251.605
198	1.97	85.9083	1183.02	579.904	150.288	1183.34	634.84	8.93701	1168.37	613.392	207.908	1029.63	762.359	-90.5492	1024.87	734.501	74.9495	966.503	641.566	348.853	713.309	628.067	194.524	932.091	518.683	239.229	975.451	570.738	184.821	1034.56	519.9	130.272	1110.72	523.269	-222.85	681.914	689.978	-161.966	740.184	421.657	-80.4331	755.06	436.622	-90.0036	764.334	337.025	-56.6214	734.908	251.498
199	1.98	85.9199	1183.25	580.028	150.29	1183.54	635.021	8.93248	1168.48	613.461	207.772	1029.67	762.557	-90.4834	1024.84	734.445	75.0315	966.409	641.809	348.766	713.964	626.895	192.96	933.547	521.267	238.507	976.468	572.751	183.42	1036	522.984	128.908	1112.09	528.029	-222.808	681.828	689.944	-161.997	740.179	421.625	-80.4627	755.074	436.608	-90.065	764.353	337.018	-56.6795	734.95	251.433
200	1.99	85.9395	1183.45	580.185	150.295	1183.71	635.27	8.927	1168.59	613.548	207.703	1029.69	762.715	-90.4478	1024.83	734.442	75.0676	966.404	641.927	348.631	714.619	625.782	191.417	934.844	523.41	237.807	977.393	574.664	182.174	1037.28	525.84	127.842	1113.32	532.064	-222.763	681.757	689.942	-162.031	740.185	421.639	-80.5162	755.084	436.616	-90.1353	764.437	336.886	-56.7524	734.992	251.356
201	2	86.016	1183.67	580.418	150.307	1183.88	635.534	8.97067	1168.68	613.676	207.67	1029.66	762.842	-90.4213	1024.8	734.485	75.0852	966.469	641.96	348.448	715.207	624.907	190.066	936.035	525.281	237.156	978.173	576.405	181.032	1038.43	528.258	126.831	1114.48	535.623	-222.715	681.72	689.967	-162.063	740.184	421.695	-80.5486	755.094	436.683	-90.1758	764.529	336.739	-56.7843	735.01	251.342
202	2.01	86.1556	1183.91	580.755	150.37	1184.06	635.807	9.07404	1168.79	613.764	207.846	1029.62	762.834	-90.3636	1024.8	734.568	75.1304	966.591	641.949	348.341	715.732	624.069	189.003	937.074	527.231	236.664	978.98	577.826	180.061	1039.42	530.665	126.001	1115.45	539.064	-222.646	681.715	689.989	-162.034	740.191	421.755	-80.5262	755.106	436.686	-90.135	764.435	336.983	-56.7249	734.974	251.481
203	2.02	86.3118	1184.15	580.988	150.473	1184.22	636.128	9.19188	1168.87	613.837	208.237	1029.59	762.64	-90.2905	1024.78	734.59	75.1867	966.733	641.826	348.278	716.166	623.15	188.126	937.903	529.096	236.304	979.744	579.018	179.217	1040.33	532.852	125.225	1116.27	542.038	-222.594	681.777	690.07	-161.973	740.191	421.728	-80.4358	755.077	436.655	-90.054	764.38	336.984	-56.6426	734.932	251.544
204	2.03	86.4354	1184.37	581.237	150.552	1184.36	636.368	9.30787	1168.95	613.954	208.357	1029.55	762.63	-90.2183	1024.74	734.619	75.2333	966.805	641.754	348.16	716.504	622.358	187.273	938.728	530.577	235.878	980.298	580.262	178.4	1041.13	534.665	124.546	1117.04	544.797	-222.561	681.852	690.147	-161.908	740.17	421.671	-80.3726	755.038	436.599	-89.9896	764.372	336.88	-56.5743	734.858	251.597
205	2.04	86.4787	1184.56	581.529	150.57	1184.48	636.626	9.36345	1169.05	614.155	208.395	1029.53	762.743	-90.2489	1024.8	734.812	75.254	966.796	641.846	347.989	716.807	621.677	186.389	939.406	531.966	235.466	980.783	581.442	177.684	1041.76	536.476	123.859	1117.7	547.384	-222.532	681.858	690.193	-161.898	740.167	421.692	-80.3517	754.999	436.613	-89.9817	764.46	336.658	-56.5651	734.772	251.7
206	2.05	86.4679	1184.75	581.802	150.546	1184.64	636.872	9.364	1169.19	614.338	208.375	1029.52	762.898	-90.3341	1024.9	735.058	75.2578	966.762	642.079	347.801	717.114	620.988	185.5	940.025	533.196	235.049	981.213	582.524	176.982	1042.41	538.128	123.351	1118.31	549.779	-222.508	681.807	690.203	-161.943	740.164	421.733	-80.3959	754.982	436.685	-90.0455	764.502	336.596	-56.644	734.769	251.687
207	2.06	86.429	1184.99	581.98	150.515	1184.82	637.035	9.35417	1169.3	614.521	208.345	1029.51	763.023	-90.2712	1024.86	735.006	75.2709	966.707	642.341	347.625	717.431	620.314	184.569	940.672	534.178	234.591	981.597	583.402	176.311	1042.98	539.475	122.796	1118.81	551.849	-222.481	681.722	690.139	-161.991	740.144	421.74	-80.4645	754.971	436.697	-90.1379	764.52	336.592	-56.7526	734.798	251.668
208	2.07	86.4107	1185.28	582.067	150.528	1185	637.227	9.39185	1169.41	614.756	208.356	1029.51	763.092	-90.3708	1025.05	735.255	75.2992	966.707	642.496	347.461	717.711	619.7	183.847	941.191	535.162	234.183	981.929	584.048	175.704	1043.45	540.543	122.267	1119.31	553.756	-222.431	681.696	690.135	-162.022	740.14	421.777	-80.5007	754.978	436.7	-90.2032	764.538	336.607	-56.8216	734.843	251.628
209	2.08	86.4549	1185.62	582.074	150.589	1185.21	637.446	9.48359	1169.56	614.903	208.426	1029.5	763.131	-90.3254	1025.13	735.336	75.3539	966.755	642.602	347.282	717.943	619.195	183.249	941.559	536.24	233.876	982.209	584.644	175.094	1043.96	541.462	121.893	1119.83	555.503	-222.366	681.748	690.21	-162	740.166	421.791	-80.492	755	436.693	-90.2	764.513	336.734	-56.8196	734.926	251.542
210	2.09	86.5594	1185.98	582.052	150.676	1185.42	637.618	9.58727	1169.71	614.97	208.515	1029.46	763.153	-90.2332	1025.16	735.318	75.4307	966.867	642.557	347.077	718.093	618.785	182.675	941.916	537.06	233.636	982.454	585.197	174.628	1044.4	542.367	121.565	1120.18	557.016	-222.297	681.841	690.342	-161.961	740.191	421.771	-80.4435	755.042	436.653	-90.151	764.429	336.946	-56.7821	735.012	251.419
211	2.1	86.6817	1186.27	582.156	150.769	1185.61	637.775	9.67934	1169.85	615.032	208.568	1029.4	763.188	-90.133	1025.2	735.294	75.4777	967.028	642.38	346.865	718.181	618.463	182.153	942.278	537.795	233.385	982.653	585.781	174.232	1044.67	543.317	121.156	1120.4	558.345	-222.24	681.905	690.355	-161.943	740.207	421.754	-80.4087	755.066	436.613	-90.1306	764.476	336.838	-56.7484	735.049	251.378
212	2.11	86.8009	1186.51	582.336	150.849	1185.78	637.987	9.75151	1169.95	615.128	208.606	1029.33	763.23	-90.0395	1025.22	735.292	75.4952	967.196	642.286	346.644	718.234	618.182	181.742	942.532	538.536	233.069	982.797	586.395	173.767	1044.88	544.297	120.721	1120.57	559.534	-222.236	681.954	690.326	-161.949	740.201	421.799	-80.4103	755.078	436.627	-90.1282	764.61	336.588	-56.7372	735.034	251.431
213	2.12	86.9054	1186.67	582.532	150.925	1185.91	638.178	9.8348	1170.02	615.247	208.668	1029.25	763.247	-89.9198	1025.23	735.303	75.5594	967.236	642.395	346.449	718.251	617.863	181.315	942.708	539.122	232.744	982.914	586.929	173.314	1045.06	545.152	120.312	1120.58	560.828	-222.267	682.046	690.378	-161.941	740.185	421.861	-80.3993	755.054	436.683	-90.1151	764.605	336.566	-56.7216	734.964	251.475
214	2.13	87.0382	1186.75	582.8	151.013	1186	638.311	9.95327	1170.05	615.36	208.765	1029.14	763.193	-89.774	1025.25	735.267	75.6786	967.175	642.577	346.289	718.269	617.471	180.912	942.775	539.705	232.455	982.967	587.316	172.922	1045.2	545.825	119.883	1120.59	561.826	-222.31	682.121	690.39	-161.901	740.164	421.861	-80.3551	755.001	436.653	-90.0748	764.474	336.713	-56.6782	734.853	251.594
215	2.14	87.1441	1186.84	583.034	151.127	1186.08	638.462	10.0715	1170.07	615.438	208.941	1028.99	763.07	-89.6659	1025.27	735.217	75.782	967.1	642.81	346.12	718.287	617.058	180.497	942.804	540.195	232.158	982.975	587.602	172.612	1045.23	546.462	119.475	1120.57	562.744	-222.359	682.151	690.291	-161.504	739.726	422.396	-80.344	754.955	436.666	-89.8256	763.907	337.942	-56.264	734.312	253.085
216	2.15	87.2032	1186.99	583.141	151.202	1186.17	638.554	10.1346	1170.14	615.527	209.174	1028.79	762.881	-89.5986	1025.34	735.169	75.8663	967.072	643.079	345.947	718.319	616.712	180.05	942.901	540.372	231.849	982.977	587.802	172.282	1045.25	546.873	119.181	1120.51	563.573	-222.408	682.163	690.231	-161.052	739.211	423.135	-80.3793	754.943	436.704	-89.5691	763.472	339.043	-55.8129	733.755	254.82
217	2.16	87.2708	1187.16	583.116	151.266	1186.26	638.596	10.2104	1170.24	615.53	209.239	1028.72	762.873	-89.5285	1025.43	735.138	75.9335	967.09	643.16	345.784	718.332	616.458	179.701	942.981	540.382	231.573	982.961	587.944	171.995	1045.26	547.122	119.059	1120.56	563.929	-222.431	682.263	690.286	-161.723	739.968	422.17	-80.4156	754.97	436.708	-89.9836	764.214	337.361	-56.52	734.598	252.416
218	2.17	87.3581	1187.28	583.133	151.381	1186.33	638.662	10.3273	1170.34	615.502	209.292	1028.65	762.855	-89.4401	1025.5	735.091	75.9789	967.207	642.904	345.651	718.317	616.281	179.422	943.009	540.46	231.363	982.945	588.016	171.769	1045.26	547.215	119.065	1120.67	563.997	-222.424	682.37	690.314	-161.889	740.179	421.923	-80.4221	755.003	436.692	-90.0841	764.372	337.009	-56.6947	734.867	251.688
219	2.18	87.4776	1187.39	583.198	151.497	1186.39	638.698	10.4459	1170.46	615.505	209.358	1028.58	762.811	-89.3385	1025.58	735.069	76.0285	967.344	642.716	345.532	718.278	616.105	179.156	943.02	540.531	231.212	982.925	587.982	171.625	1045.24	547.202	119.129	1120.78	563.948	-222.442	682.625	690.562	-161.93	740.244	421.828	-80.4023	755.041	436.656	-90.1204	764.498	336.758	-56.7313	734.946	251.529
220	2.19	87.6089	1187.46	583.27	151.6	1186.44	638.703	10.5616	1170.53	615.527	209.438	1028.51	762.773	-89.2281	1025.63	735.036	76.0788	967.499	642.563	345.429	718.213	615.969	178.916	942.985	540.565	231.115	982.88	587.888	171.554	1045.22	547.125	119.221	1120.87	563.83	-222.47	682.913	690.888	-161.922	740.257	421.811	-80.3972	755.051	436.626	-90.0911	764.392	336.965	-56.7168	734.95	251.492
221	2.2	87.7058	1187.49	583.307	151.7	1186.45	638.71	10.6575	1170.55	615.548	209.514	1028.45	762.744	-89.1118	1025.65	735.008	76.1074	967.589	642.391	345.297	718.1	615.835	178.717	942.905	540.578	231.044	982.811	587.752	171.515	1045.16	547.02	119.349	1120.93	563.669	-222.448	682.789	690.531	-161.902	740.246	421.781	-80.3726	755.015	436.608	-90.0646	764.395	336.862	-56.6996	734.911	251.497
222	2.21	87.7679	1187.49	583.375	151.793	1186.46	638.732	10.7206	1170.57	615.582	209.594	1028.38	762.715	-89.029	1025.66	735.002	76.119	967.619	642.424	345.138	717.982	615.746	178.499	942.799	540.68	230.96	982.747	587.676	171.468	1045.1	546.956	119.467	1120.98	563.487	-222.494	682.787	690.458	-161.528	739.798	422.387	-80.3983	754.985	436.643	-89.8898	764.097	337.509	-56.3138	734.404	252.923
223	2.22	87.7866	1187.49	583.406	151.833	1186.47	638.711	10.7487	1170.59	615.638	209.654	1028.33	762.683	-88.9648	1025.7	735.019	76.1325	967.604	642.653	344.959	717.901	615.699	178.231	942.712	540.819	230.852	982.695	587.673	171.384	1045.06	546.931	119.539	1121.03	563.344	-222.55	682.806	690.449	-161.086	739.247	423.165	-80.4532	754.987	436.703	-89.7095	763.585	338.735	-55.8619	733.793	254.749
224	2.23	87.8402	1187.51	583.356	151.879	1186.5	638.668	10.8047	1170.59	615.647	209.72	1028.29	762.662	-88.8992	1025.75	735.004	76.1995	967.592	642.819	344.797	717.816	615.646	177.987	942.67	540.921	230.735	982.653	587.682	171.278	1045.02	546.902	119.585	1121.05	563.263	-222.58	682.839	690.419	-161.757	739.978	422.202	-80.4995	755.002	436.69	-90.0702	764.103	337.534	-56.5755	734.571	252.414
225	2.24	87.9472	1187.56	583.255	151.969	1186.52	638.607	10.9176	1170.6	615.573	209.799	1028.24	762.626	-88.7835	1025.8	734.968	76.3145	967.607	642.851	344.688	717.742	615.574	177.808	942.642	541.03	230.645	982.6	587.711	171.197	1044.99	546.957	119.641	1121.06	563.266	-222.586	683.054	690.646	-161.9	740.181	421.939	-80.465	755.011	436.663	-90.1268	764.248	337.203	-56.7194	734.793	251.772
226	2.25	88.0954	1187.59	583.229	152.107	1186.54	638.594	11.0558	1170.6	615.487	209.887	1028.19	762.586	-88.628	1025.83	734.911	76.4681	967.633	642.96	344.626	717.677	615.484	177.666	942.59	541.214	230.578	982.544	587.791	171.123	1044.96	547.09	119.7	1121.04	563.339	-222.594	683.494	691.191	-161.897	740.253	421.849	-80.4054	755.019	436.661	-90.1038	764.341	336.984	-56.7028	734.825	251.667
227	2.26	88.2416	1187.64	583.147	152.237	1186.59	638.585	11.1788	1170.61	615.423	209.969	1028.12	762.55	-88.496	1025.86	734.857	76.5782	967.723	642.941	344.569	717.603	615.391	177.507	942.561	541.375	230.491	982.484	587.926	171.044	1044.92	547.211	119.717	1121	563.426	-222.54	683.482	691.041	-161.871	740.28	421.844	-80.3554	755.026	436.637	-90.0729	764.44	336.783	-56.6704	734.859	251.616
228	2.27	88.3601	1187.69	582.962	152.334	1186.61	638.521	11.2722	1170.63	615.321	210.016	1028.04	762.541	-88.3847	1025.88	734.805	76.6637	967.825	642.766	344.506	717.52	615.317	177.347	942.531	541.471	230.373	982.424	588.043	170.928	1044.88	547.255	119.704	1120.96	563.505	-222.487	683.238	690.593	-161.86	740.284	421.794	-80.3488	755.054	436.584	-90.0417	764.417	336.812	-56.6636	734.914	251.523
229	2.28	88.4369	1187.68	582.905	152.417	1186.59	638.476	11.3444	1170.63	615.253	210.076	1027.98	762.57	-88.2906	1025.89	734.758	76.7256	967.888	642.647	344.446	717.452	615.291	177.202	942.453	541.673	230.271	982.333	588.153	170.828	1044.81	547.33	119.701	1120.93	563.577	-222.471	683.227	690.557	-161.874	740.298	421.812	-80.3567	755.071	436.588	-90.0502	764.476	336.694	-56.6823	734.935	251.486
230	2.29	88.4858	1187.6	582.981	152.473	1186.54	638.393	11.3862	1170.6	615.249	210.15	1027.93	762.558	-88.2016	1025.9	734.703	76.7928	967.85	642.74	344.419	717.378	615.258	177.065	942.328	541.994	230.196	982.221	588.255	170.771	1044.71	547.43	119.732	1120.9	563.648	-222.485	683.257	690.591	-161.512	739.868	422.414	-80.3641	755.052	436.654	-89.8508	764.003	337.811	-56.279	734.352	253.054
231	2.3	88.5268	1187.54	582.972	152.536	1186.49	638.255	11.4355	1170.57	615.233	210.222	1027.89	762.489	-88.1299	1025.88	734.62	76.8845	967.762	642.851	344.401	717.32	615.188	176.958	942.222	542.166	230.146	982.138	588.29	170.741	1044.61	547.461	119.776	1120.88	563.638	-222.492	683.236	690.52	-161.033	739.301	423.106	-80.3558	755.021	436.659	-89.599	763.519	338.916	-55.7601	733.629	254.992
232	2.31	88.5521	1187.51	582.843	152.568	1186.45	638.061	11.4747	1170.53	615.169	210.278	1027.87	762.452	-88.0866	1025.87	734.517	76.9824	967.676	642.927	344.367	717.259	615.154	176.864	942.146	542.239	230.125	982.066	588.287	170.726	1044.53	547.458	119.822	1120.85	563.604	-222.501	683.341	690.697	-161.682	740	422.13	-80.3779	754.984	436.641	-89.9679	764.051	337.512	-56.462	734.502	252.451
233	2.32	88.5404	1187.51	582.736	152.597	1186.43	637.978	11.4891	1170.5	615.147	210.308	1027.88	762.435	-88.0504	1025.88	734.482	77.0007	967.646	642.982	344.335	717.212	615.222	176.783	942.112	542.317	230.093	982.022	588.317	170.708	1044.51	547.484	119.864	1120.84	563.621	-222.51	683.678	691.249	-161.88	740.174	421.89	-80.4082	754.977	436.655	-90.1152	764.208	337.177	-56.6978	734.738	251.818
234	2.33	88.5336	1187.5	582.677	152.633	1186.41	637.914	11.5032	1170.49	615.154	210.331	1027.9	762.46	-88.0049	1025.9	734.486	77.0207	967.666	643.048	344.289	717.152	615.326	176.746	942.12	542.321	230.08	981.976	588.359	170.719	1044.49	547.507	119.903	1120.84	563.644	-222.442	683.599	691.189	-161.938	740.211	421.912	-80.4393	755.002	436.68	-90.1774	764.326	337.038	-56.7885	734.819	251.679
235	2.34	88.5864	1187.5	582.539	152.693	1186.4	637.8	11.5749	1170.5	615.08	210.376	1027.9	762.453	-87.9336	1025.92	734.458	77.0357	967.738	642.905	344.26	717.074	615.399	176.769	942.116	542.276	230.127	981.91	588.365	170.78	1044.46	547.463	119.962	1120.84	563.643	-222.33	683.302	690.749	-161.921	740.242	421.933	-80.4337	755.04	436.652	-90.1806	764.447	336.841	-56.7801	734.897	251.559
236	2.35	88.6759	1187.48	582.448	152.784	1186.38	637.735	11.6643	1170.51	614.99	210.453	1027.87	762.419	-87.8616	1025.93	734.435	77.1114	967.783	642.754	344.298	717.008	615.439	176.874	942.043	542.24	230.214	981.854	588.363	170.865	1044.43	547.462	120.043	1120.83	563.638	-222.246	683.267	690.659	-161.888	740.261	421.874	-80.391	755.047	436.615	-90.1305	764.436	336.844	-56.7472	734.94	251.478
237	2.36	88.7614	1187.4	582.427	152.884	1186.35	637.719	11.7485	1170.5	614.934	210.524	1027.86	762.361	-87.8014	1025.93	734.408	77.1877	967.765	642.68	344.382	716.933	615.457	177.032	941.939	542.189	230.297	981.789	588.311	170.966	1044.34	547.468	120.144	1120.77	563.65	-222.199	683.296	690.711	-161.464	739.841	422.399	-80.3405	755.033	436.605	-89.8944	764.16	337.498	-56.301	734.447	252.911
238	2.37	88.8265	1187.3	582.47	152.95	1186.31	637.691	11.8154	1170.47	614.893	210.581	1027.81	762.274	-87.7702	1025.9	734.354	77.2617	967.716	642.583	344.457	716.826	615.506	177.185	941.792	542.086	230.368	981.679	588.172	171.087	1044.2	547.448	120.232	1120.68	563.625	-222.156	683.295	690.75	-160.967	739.312	423.118	-80.3011	755.003	436.59	-89.597	763.596	338.777	-55.7745	733.826	254.67
239	2.38	88.8606	1187.18	582.585	152.972	1186.26	637.668	11.8412	1170.45	614.885	210.591	1027.8	762.24	-87.7627	1025.9	734.319	77.2706	967.656	642.544	344.55	716.735	615.635	177.325	941.62	541.846	230.449	981.557	588.023	171.188	1044.01	547.32	120.281	1120.57	563.564	-222.128	683.208	690.699	-161.234	739.584	422.768	-80.3153	754.98	436.631	-89.7442	763.765	338.301	-56.0746	734.042	253.859
240	2.39	88.8311	1187.07	582.681	152.97	1186.21	637.685	11.8159	1170.43	614.969	210.575	1027.81	762.256	-87.77	1025.89	734.321	77.2382	967.55	642.693	344.682	716.676	615.854	177.498	941.405	541.555	230.549	981.428	587.851	171.315	1043.77	547.133	120.301	1120.45	563.462	-222.125	683.148	690.708	-160.592	738.798	423.843	-80.3651	754.968	436.7	-89.4441	763.126	339.836	-55.3734	733.078	256.654
241	2.4	88.7769	1187.02	582.608	152.964	1186.17	637.635	11.7753	1170.4	615.016	210.573	1027.8	762.22	-87.7888	1025.88	734.305	77.2669	967.423	642.831	344.846	716.613	616.092	177.783	941.189	541.132	230.696	981.299	587.583	171.484	1043.52	546.774	120.342	1120.29	563.244	-222.117	683.089	690.689	-160.84	739.027	423.539	-80.3926	754.957	436.698	-89.5828	763.27	339.494	-55.6289	733.426	255.727
242	2.41	88.7436	1187.02	582.408	152.968	1186.13	637.519	11.7674	1170.38	614.969	210.58	1027.77	762.137	-87.7932	1025.88	734.242	77.3424	967.366	642.796	345.034	716.532	616.362	178.229	940.985	540.431	230.905	981.162	587.162	171.753	1043.3	546.207	120.382	1120.07	562.78	-222.075	683.058	690.645	-161.634	739.925	422.265	-80.3757	754.978	436.62	-90.0142	764.03	337.655	-56.4846	734.464	252.639
243	2.42	88.6935	1187.01	582.254	152.969	1186.11	637.44	11.7606	1170.36	614.927	210.567	1027.78	762.155	-87.8091	1025.9	734.21	77.3931	967.397	642.668	345.224	716.417	616.7	178.755	940.776	539.615	231.147	981.009	586.633	172.066	1043.1	545.484	120.358	1119.73	561.972	-222.031	683.031	690.643	-161.81	740.159	421.943	-80.3477	755.024	436.583	-90.1067	764.268	337.154	-56.6705	734.823	251.745
244	2.43	88.6093	1186.98	582.182	152.899	1186.09	637.313	11.693	1170.34	614.995	210.524	1027.77	762.231	-87.8227	1025.92	734.293	77.4065	967.432	642.682	345.388	716.254	617.123	179.299	940.463	538.775	231.35	980.801	586.033	172.384	1042.75	544.687	120.322	1119.28	560.881	-222.008	683.053	690.731	-161.864	740.253	421.914	-80.3545	755.056	436.603	-90.1291	764.355	337.034	-56.7247	734.963	251.499
245	2.44	88.504	1186.87	582.174	152.824	1186.03	637.247	11.5997	1170.31	615.126	210.49	1027.75	762.332	-87.8415	1025.93	734.36	77.3829	967.512	642.647	345.581	716.065	617.625	179.931	940.058	537.812	231.551	980.51	585.305	172.794	1042.28	543.577	120.411	1118.77	559.323	-221.981	683.05	690.735	-161.88	740.276	421.924	-80.3551	755.093	436.624	-90.1287	764.453	336.898	-56.728	735.021	251.44
246	2.45	88.3917	1186.64	582.336	152.774	1185.91	637.221	11.529	1170.22	615.265	210.469	1027.71	762.391	-87.8571	1025.89	734.423	77.3623	967.53	642.598	345.847	715.876	618.185	180.732	939.492	536.601	231.823	980.116	584.411	173.32	1041.78	542.053	120.624	1118.2	557.019	-221.971	683.035	690.701	-161.477	739.843	422.478	-80.325	755.092	436.626	-89.9146	764.203	337.515	-56.2923	734.438	253.006
247	2.46	88.2552	1186.31	582.545	152.701	1185.75	637.171	11.4188	1170.05	615.471	210.452	1027.66	762.405	-87.8867	1025.83	734.487	77.3568	967.409	642.71	346.201	715.722	618.851	181.55	938.769	535.284	232.177	979.697	583.366	173.986	1041.09	540.412	121.041	1117.57	554.335	-221.987	683.054	690.735	-160.981	739.283	423.155	-80.2953	755.02	436.664	-89.6255	763.62	338.747	-55.7582	733.651	255.021
248	2.47	88.0703	1186.04	582.693	152.593	1185.57	637.119	11.255	1169.89	615.698	210.428	1027.63	762.443	-87.9425	1025.76	734.55	77.325	967.266	642.894	346.611	715.568	619.605	182.466	937.981	533.704	232.579	979.289	582.116	174.785	1040.26	538.508	121.572	1116.84	551.247	-222.03	683.038	690.724	-161.619	739.953	422.209	-80.2968	754.96	436.646	-89.9626	764.117	337.382	-56.4469	734.42	252.567
249	2.48	87.8086	1185.89	582.675	152.458	1185.44	637.064	11.0273	1169.81	615.925	210.393	1027.61	762.516	-88.0173	1025.72	734.642	77.2419	967.187	642.995	347.037	715.363	620.34	183.507	937.189	531.928	232.953	978.82	580.766	175.662	1039.44	536.155	122.386	1116.03	547.831	-222.059	682.951	690.624	-161.789	740.113	421.965	-80.3245	754.947	436.608	-90.0848	764.359	336.784	-56.6463	734.611	251.968
250	2.49	87.4791	1185.84	582.633	152.266	1185.35	636.986	10.7372	1169.79	616.186	210.341	1027.62	762.609	-88.1338	1025.72	734.774	77.1117	967.177	643.015	347.458	715.147	621.166	184.717	936.34	530.042	233.39	978.208	579.278	176.731	1038.51	533.677	123.137	1115.23	543.637	-222.095	682.866	690.588	-161.888	740.167	421.935	-80.388	754.97	436.65	-90.1663	764.405	336.782	-56.7648	734.73	251.783
251	2.5	87.1594	1185.84	582.611	152.08	1185.3	636.915	10.4566	1169.8	616.477	210.297	1027.63	762.684	-88.2474	1025.73	734.893	77.0064	967.23	643.006	347.921	714.916	622.225	186.086	935.432	527.795	233.86	977.506	577.752	177.972	1037.54	530.714	124.021	1114.42	539.004	-222.107	682.835	690.619	-161.958	740.215	421.959	-80.4505	754.999	436.702	-90.2296	764.358	337.031	-56.8238	734.851	251.652
252	2.51	86.8833	1185.87	582.567	151.907	1185.26	636.839	10.2368	1169.83	616.672	210.284	1027.64	762.701	-88.3355	1025.73	734.98	76.9353	967.301	642.899	348.444	714.635	623.353	187.685	934.463	525.08	234.47	976.846	576.005	179.42	1036.54	527.384	125.191	1113.36	534.278	-222.09	682.794	690.603	-161.959	740.231	421.936	-80.4542	755.031	436.691	-90.2286	764.386	337.033	-56.8147	734.971	251.496
253	2.52	86.6088	1185.88	582.573	151.737	1185.23	636.856	10.0455	1169.85	616.833	210.291	1027.63	762.685	-88.4101	1025.74	735.079	76.9039	967.346	642.839	349.033	714.479	624.599	189.607	933.422	522.238	235.212	976.137	574	181.157	1035.4	524.002	126.52	1112.04	529.288	-222.059	682.757	690.604	-161.927	740.244	421.903	-80.4083	755.057	436.643	-90.1821	764.411	337.014	-56.7855	735.065	251.352
254	2.53	86.3098	1185.81	582.77	151.529	1185.21	636.97	9.82242	1169.85	617.117	210.279	1027.63	762.701	-88.5075	1025.73	735.197	76.8538	967.356	642.921	349.597	714.602	626.361	191.896	932.082	519.519	235.986	975.337	572.049	182.992	1034.16	520.267	128.056	1110.64	523.537	-222.041	682.709	690.588	-161.911	740.257	421.889	-80.3842	755.07	436.636	-90.1512	764.42	337.061	-56.7587	735.059	251.41
255	2.54	85.9864	1185.73	583.034	151.275	1185.19	637.09	9.33504	1169.87	617.278	210.212	1027.62	762.739	-88.6204	1025.7	735.323	76.7573	967.306	643.122	350.144	714.414	628.074	194.425	930.649	516.573	236.797	974.46	570.164	185.02	1032.78	516.565	129.714	1109.02	517.215	-222.074	682.81	690.866	-161.926	740.235	421.912	-80.409	755.071	436.682	-90.1642	764.468	336.966	-56.7611	735.012	251.504
256	2.55	85.6328	1185.64	583.281	150.988	1185.19	637.202	8.78014	1169.91	617.399	210.228	1027.57	762.621	-88.7443	1025.66	735.448	76.6275	967.265	643.18	350.67	714.058	629.502	197.259	929.134	513.428	237.555	973.53	568.281	187.206	1031.19	512.85	131.184	1106.9	510.898	-222.159	683.141	691.54	-161.562	739.776	422.494	-80.4297	755.05	436.677	-89.9707	764.135	337.694	-56.3706	734.396	253.127
257	2.56	85.2421	1185.54	583.597	150.688	1185.16	637.296	8.80204	1169.85	617.961	209.967	1027.58	762.66	-88.8638	1025.58	735.53	76.4884	967.203	643.183	351.301	713.642	631.037	200.378	927.533	510.145	238.278	972.492	566.352	189.527	1029.49	509.089	132.769	1104.63	504.526	-222.15	683.024	691.438	-161.108	739.2	423.208	-80.4407	755	436.699	-89.7102	763.516	338.987	-55.8777	733.636	255.064
258	2.57	84.8428	1185.49	583.895	150.401	1185.14	637.387	8.53947	1169.82	618.387	209.165	1027.68	763.319	-88.9685	1025.52	735.624	76.3703	967.122	643.341	351.933	713.241	632.641	203.875	925.894	506.669	238.844	971.21	564.669	191.9	1027.76	505.346	134.294	1102.13	497.954	-222.067	682.568	690.795	-161.748	739.885	422.245	-80.4435	754.96	436.726	-90.0641	764.053	337.632	-56.5745	734.414	252.61
259	2.58	84.4181	1185.56	584.035	150.106	1185.22	637.486	8.19197	1169.86	618.709	209.164	1027.39	763.034	-89.0924	1025.5	735.724	76.2685	967.138	643.339	352.552	712.916	634.251	207.692	924.324	502.862	239.186	969.551	563.132	194.308	1026.01	501.423	135.839	1099.26	491.035	-222.007	682.391	690.622	-161.902	740.049	421.982	-80.4512	754.966	436.729	-89.9518	763.911	338.157	-56.3928	734.265	253.432
260	2.59	83.9666	1185.69	584.059	149.757	1185.36	637.532	7.83074	1169.92	619.023	209.308	1027.02	762.575	-89.2236	1025.5	735.81	76.1787	967.283	643.135	353.056	712.836	636.283	211.708	922.707	499.067	239.482	968.096	561.26	196.877	1024.2	497.543	137.467	1096.23	484.226	-221.982	682.452	690.863	-161.977	740.108	421.928	-80.4783	755.017	436.738	-89.5514	763.367	339.937	-55.6278	733.566	256.313
261	2.6	83.5314	1185.8	584.157	149.402	1185.51	637.581	7.28172	1169.98	619.192	209.513	1026.63	762.052	-89.3492	1025.49	735.904	76.098	967.409	642.994	353.405	712.901	638.579	215.851	920.897	495.457	239.576	966.45	559.423	199.417	1022.26	493.616	139.078	1092.94	477.136	-222.019	682.718	691.489	-162.022	740.145	421.977	-80.5093	755.075	436.744	-89.4729	763.368	340.288	-55.2825	733.447	256.731
262	2.61	83.1281	1185.86	584.36	149.062	1185.63	637.68	6.52328	1170.07	619.134	209.762	1026.63	761.914	-89.493	1025.49	735.972	76.0519	967.434	643.003	354.115	712.741	640.551	220.2	920.476	488.892	239.289	964.581	557.56	201.576	1020.02	489.984	140.748	1089.31	469.984	-222.018	682.752	691.722	-162.019	740.157	421.997	-80.5195	755.126	436.732	-89.4485	763.461	340.311	-55.0931	733.502	256.553
263	2.62	82.707	1185.88	584.436	148.705	1185.69	637.679	6.051	1170.1	619.301	209.938	1027.2	762.376	-89.6284	1025.47	736.035	76.0237	967.368	643.094	354.807	712.476	642.431	224.414	921.946	478.555	239.001	962.651	555.403	203.602	1017.62	486.14	142.396	1085.19	462.688	-221.977	682.556	691.519	-162.024	740.144	421.929	-80.5308	755.136	436.674	-89.4525	763.513	340.252	-55.035	733.541	256.364
264	2.63	82.2338	1185.85	584.529	148.34	1185.72	637.624	5.61247	1170.11	619.587	209.906	1027.37	762.592	-89.7812	1025.4	736.101	75.9809	967.248	643.297	355.508	712.305	644.281	228.65	919.266	476.146	238.839	960.491	553.129	205.719	1014.99	482.296	144.174	1080.96	455.548	-221.925	682.14	690.889	-162.042	740.119	421.894	-80.56	755.115	436.678	-89.4984	763.485	340.25	-54.9989	733.536	256.244
265	2.64	81.7767	1185.73	584.864	147.963	1185.73	637.684	5.18926	1170.07	619.99	209.84	1027.41	762.77	-89.9528	1025.31	736.193	75.8693	967.164	643.51	356.232	712.115	646.169	233.823	914.031	478.317	238.67	958.116	550.886	207.776	1012.19	478.512	146.079	1076.55	448.217	-221.957	681.972	690.719	-162.081	740.073	421.934	-80.5988	755.058	436.758	-89.5457	763.327	340.42	-54.9859	733.491	256.234
266	2.65	81.3528	1185.61	585.187	147.584	1185.72	637.831	4.83446	1170.01	620.36	209.788	1027.43	762.929	-90.0831	1025.2	736.325	75.7162	967.186	643.487	357.029	711.91	648.247	238.689	910.829	477.14	238.365	955.558	548.659	209.834	1009.37	474.631	148.216	1071.87	441.156	-221.986	681.837	690.646	-162.112	740.01	421.94	-80.6193	755.004	436.843	-89.5605	763.19	340.598	-54.9983	733.439	256.243
267	2.66	80.9741	1185.53	585.444	147.243	1185.74	637.913	4.71552	1169.91	620.798	209.764	1027.42	763.041	-90.1902	1025.1	736.42	75.617	967.201	643.419	357.823	711.603	650.069	243.378	908.134	475.178	237.716	952.684	546.243	212.008	1006.38	470.998	150.469	1067	433.931	-221.996	681.76	690.643	-161.711	739.562	422.535	-80.5998	754.965	436.829	-89.5517	763.094	340.618	-54.9742	733.395	256.242
268	2.67	80.6072	1185.49	585.683	146.959	1185.76	638.022	4.65997	1169.83	621.263	209.751	1027.44	763.113	-90.2776	1025.03	736.475	75.6608	967.333	643.815	358.548	711.325	652.009	248.005	905.586	472.965	236.601	949.391	543.433	213.78	1003.07	467.232	152.814	1061.88	426.673	-221.978	681.708	690.639	-161.196	739.026	423.236	-80.5385	754.964	436.785	-89.532	763.052	340.563	-54.9283	733.374	256.248
269	2.68	80.1876	1185.59	585.741	146.68	1185.84	638.12	4.04249	1169.9	621.267	209.729	1027.49	763.172	-90.3566	1025	736.527	75.6289	967.679	643.908	359.227	711.015	653.765	252.622	903.284	470.696	235.553	946.149	540.701	215.421	999.721	463.479	155.272	1056.57	419.423	-221.932	681.667	690.635	-161.443	739.339	422.82	-80.5204	754.992	436.749	-89.4639	763.111	340.57	-54.9049	733.412	256.231
270	2.69	79.7423	1185.77	585.7	146.351	1185.97	638.143	3.58747	1170.01	621.39	209.684	1027.6	763.28	-90.4723	1025.03	736.594	75.2779	967.762	642.705	359.89	710.903	655.658	257.252	901.052	468.781	234.352	942.827	537.999	216.875	996.297	459.804	157.702	1051.06	412.03	-221.889	681.645	690.705	-161.15	739.032	423.306	-80.5485	755.069	436.735	-89.5045	763.306	340.267	-54.9393	733.507	256.225
271	2.7	79.2896	1185.97	585.617	145.982	1186.13	638.191	3.17188	1170.11	621.586	209.587	1027.72	763.385	-90.6174	1025.06	736.647	75.3032	967.572	643.142	360.42	710.777	657.607	261.679	898.937	466.803	233.102	939.203	535.24	218.143	992.691	456.228	160.195	1045.45	404.656	-221.897	681.556	690.739	-161.882	739.824	422.26	-80.6101	755.153	436.753	-89.5417	763.505	340.294	-54.9962	733.579	256.21
272	2.71	78.8576	1186.09	585.613	145.587	1186.27	638.192	2.79434	1170.12	621.852	209.472	1027.83	763.505	-90.7602	1025.04	736.68	75.3216	967.55	643.706	360.908	710.689	659.417	266.229	896.908	464.748	232.015	935.293	532.232	219.212	988.785	452.648	162.694	1039.7	397.612	-221.921	681.423	690.726	-162.099	740.045	422.025	-80.681	755.196	436.781	-89.5995	763.594	340.285	-55.0386	733.606	256.196
273	2.72	78.468	1186.08	585.737	145.205	1186.36	638.204	2.43809	1170.06	622.077	209.354	1027.89	763.59	-90.8906	1024.99	736.718	75.2865	967.759	644.029	361.397	710.627	661.321	271.039	894.827	462.782	231.437	930.981	529.011	220.188	984.614	448.909	165.17	1033.72	391.172	-221.953	681.277	690.694	-161.773	739.635	422.516	-80.7114	755.176	436.81	-89.5855	763.442	340.411	-55.0487	733.581	256.168
274	2.73	78.0938	1186.01	586.022	144.889	1186.39	638.292	2.11145	1169.96	622.316	209.26	1027.92	763.685	-91.0062	1024.9	736.761	75.0172	967.937	643.401	362.029	710.548	663.475	275.357	892.465	460.918	231.353	926.357	525.65	221.112	980.187	444.995	167.506	1027.57	385.166	-221.962	681.15	690.647	-161.296	739.045	423.224	-80.6973	755.094	436.827	-89.5328	763.169	340.639	-55.0472	733.531	256.169
275	2.74	77.7153	1185.91	586.41	144.607	1186.4	638.444	1.77517	1169.87	622.581	209.189	1027.94	763.835	-91.1166	1024.79	736.829	74.9221	967.835	643.583	362.925	710.481	665.833	279.463	889.917	459.23	231.716	921.68	522.526	221.959	975.339	441.024	169.607	1021.27	379.422	-221.945	681.067	690.629	-161.958	739.666	422.26	-80.6935	755.011	436.893	-89.5732	763.234	340.715	-55.0441	733.508	256.175
276	2.75	77.3264	1185.87	586.777	144.309	1186.43	638.621	1.42458	1169.84	622.869	209.112	1027.96	763.956	-91.2232	1024.69	736.923	74.8816	967.708	643.966	363.5	710.249	667.467	283.363	887.258	457.707	232.148	918.527	520.5	222.587	970.144	437.316	171.529	1014.71	373.59	-221.911	680.981	690.635	-161.743	739.398	422.707	-80.694	754.965	436.976	-89.6133	763.191	340.796	-55.0465	733.509	256.157
277	2.76	76.9574	1185.9	586.927	143.979	1186.48	638.743	1.10962	1169.81	623.124	209.03	1027.98	764.042	-91.3344	1024.61	736.973	74.837	967.682	644.114	363.901	709.942	668.816	287.081	884.385	456.054				223.324	964.854	433.377	173.404	1007.78	367.598	-221.852	680.917	690.67	-161.283	738.915	423.404	-80.6712	754.981	436.967	-89.6451	763.231	340.701	-55.0233	733.421	256.305
278	2.77	76.6327	1185.94	586.986	143.653	1186.57	638.868	0.81536	1169.79	623.301	208.972	1027.99	764.033	-91.4507	1024.54	737.03	74.7652	967.798	643.956	364.147	709.71	670.319	290.637	881.35	454.156				224.236	959.356	429.211	175.41	1000.44	361.327	-221.786	680.856	690.735	-161.531	739.21	422.934	-80.6492	755.023	436.872	-89.5899	763.28	340.681	-55.0102	733.431	256.32
279	2.78	76.2838	1185.98	587.103	143.324	1186.7	638.981	0.5062	1169.76	623.523	208.908	1028.03	764.026	-91.5886	1024.53	737.113	74.6253	967.991	643.709	364.306	709.478	671.902	293.901	878.161	452.083				225.345	953.659	424.785	177.557	992.657	354.82	-221.748	680.753	690.789	-161.218	738.871	423.405	-80.6551	755.058	436.832	-89.6138	763.432	340.381	-55.0474	733.48	256.315
280	2.79	75.8	1186.12	587.102	142.935	1186.82	639.003	0.14674	1169.76	623.765	208.801	1028.09	764.025	-91.7735	1024.53	737.178	74.4234	968.149	643.592	364.403	709.254	673.298	296.835	874.802	450.277				226.579	947.851	420.204	179.73	984.773	348.572	-221.736	680.595	690.733	-161.944	739.652	422.36	-80.7101	755.104	436.865	-89.6491	763.604	340.454	-55.1128	733.52	256.324
281	2.8	75.2582	1186.3	587.018	142.511	1186.94	638.997	-0.26128	1169.77	624.016	208.648	1028.14	763.975	-91.9851	1024.49	737.273	74.2162	968.215	643.602	364.453	709.045	674.81	299.416	871.349	449.224				227.988	941.993	415.624	182.153	976.72	342.559	-221.755	680.404	690.641	-162.208	739.874	422.148	-80.8038	755.134	436.918	-89.7324	763.692	340.521	-55.2105	733.544	256.337
282	2.81	74.7383	1186.4	587.14	142.109	1187.03	639.116	-0.68631	1169.76	624.349	208.519	1028.17	763.933	-92.1594	1024.43	737.406	74.0507	968.183	643.736	364.506	708.968	676.305	302.075	867.978	447.847				229.572	935.974	410.955	184.925	968.281	336.552	-221.767	680.24	690.59	-162.324	739.908	422.138	-80.8705	755.122	436.998	-89.7943	763.733	340.616	-55.2808	733.54	256.384
283	2.82	74.3391	1186.39	587.507	141.758	1187.09	639.225	-1.04523	1169.73	624.664	208.462	1028.18	763.898	-92.2822	1024.32	737.524	73.9642	968.131	643.861	364.439	709.001	677.982	304.835	864.403	446.459				231.462	929.886	406.408	188.029	959.451	330.503	-221.774	680.126	690.621	-162.319	739.854	422.225	-80.8674	755.063	437.073	-89.8068	763.719	340.735	-55.2831	733.513	256.431
284	2.83	74.0245	1186.35	587.832	141.469	1187.14	639.285	-1.3247	1169.67	624.88	208.432	1028.19	763.796	-92.3534	1024.22	737.599	73.9277	968.085	643.904	364.481	708.788	679.397	307.519	860.609	445.051				233.518	923.857	401.867	191.24	950.586	324.74	-221.746	680.067	690.711	-162.261	739.78	422.196	-80.8148	755.023	437.068	-89.7629	763.703	340.795	-55.2396	733.474	256.461
285	2.84	73.6885	1186.34	588.03	141.188	1187.2	639.345	-1.59674	1169.65	625.039	208.388	1028.21	763.66	-92.4134	1024.12	737.665	73.8518	968.088	643.846	364.738	708.276	680.505	310.124	856.607	443.363				235.637	917.744	397.787	194.764	942.176	319.458	-221.69	680.022	690.804	-161.841	739.314	422.755	-80.7733	755.004	437.052	-89.7242	763.653	340.802	-55.1996	733.447	256.473
286	2.85	73.276	1186.37	588.252	140.875	1187.28	639.412	-1.91572	1169.65	625.282	208.332	1028.25	763.588	-92.4982	1024.06	737.784	73.7508	968.086	643.955	365.018	707.699	681.672	312.739	852.405	441.864				237.755	911.296	394.164	198.743	934.352	314.61	-221.641	680.004	690.901	-161.002	738.369	424.139	-80.79	755.02	437.076	-89.7939	763.615	340.811	-55.2227	733.452	256.511
287	2.86	72.8389	1186.42	588.445	140.531	1187.36	639.488	-2.27262	1169.67	625.6	208.27	1028.29	763.54	-92.5825	1024	737.856	73.6306	968.104	644.054	364.869	707.766	683.332	315.267	848.208	440.521				240.109	905.108	390.822	202.086	926.763	310.387	-221.588	679.921	690.957	-160.819	738.106	424.561	-80.8287	755.045	437.143	-89.9066	763.665	340.785	-55.2668	733.463	256.546
288	2.87	72.3958	1186.52	588.5	140.15	1187.44	639.481	-2.66621	1169.68	625.901	208.206	1028.34	763.443	-92.668	1023.96	737.886	73.5241	968.134	644.036	364.788	707.525	684.782	317.612	844.052	439.202				242.391	899.071	387.603	205.406	919.361	306.611	-221.556	679.795	690.968	-160.806	738.049	424.646	-80.8586	755.057	437.164	-89.9515	763.686	340.84	-55.3171	733.483	256.545
289	2.88	71.9457	1186.59	588.544	139.762	1187.53	639.427	-3.079	1169.75	626.172	208.135	1028.37	763.324	-92.7796	1023.94	737.888	73.406	968.129	644.037	364.657	707.211	686.128	319.92	839.893	438.076				244.745	893.164	384.324	208.751	911.885	303.08	-221.567	679.648	690.908	-160.838	738.028	424.677	-80.9203	755.063	437.191	-89.9418	763.638	340.974	-55.3655	733.498	256.551
290	2.89	71.5066	1186.64	588.67	139.405	1187.64	639.423	-3.50948	1169.81	626.459	208.059	1028.41	763.254	-92.8933	1023.92	737.891	73.28	968.146	644.042	364.455	706.869	687.497	322.254	835.952	437.221				247.11	887.272	381.214	212.182	904.317	299.696	-221.591	679.529	690.877	-160.854	738.009	424.744	-80.9961	755.096	437.218	-89.9186	763.566	341.161	-55.4349	733.522	256.565
291	2.9	71.0457	1186.74	588.726	139.114	1187.75	639.425	-3.86608	1169.83	626.671	207.985	1028.44	763.202	-92.9889	1023.91	737.881	73.1478	968.196	643.968	364.256	706.546	688.866	324.559	832.122	436.333	249.419	840.832	468.267	249.504	881.289	378.302	216.013	896.373	295.323	-221.611	679.454	690.872	-160.895	738.018	424.802	-81.0627	755.127	437.271	-89.9336	763.562	341.275	-55.4892	733.54	256.609
292	2.91	70.6058	1186.82	588.741	138.828	1187.86	639.389	-4.14786	1169.85	626.852	207.921	1028.46	763.155	-93.0546	1023.9	737.877	73.0735	968.219	643.989	364.016	706.2	690.125	326.585	827.808	435.332	250.075	837.571	465.926	251.898	875.237	375.441	220.083	887.778	289.659	-221.623	679.437	690.896	-160.929	738.035	424.865	-81.0885	755.141	437.291	-89.9745	763.628	341.261	-55.51	733.558	256.643
293	2.92	70.2562	1186.78	588.954	138.559	1187.93	639.409	-4.39381	1169.83	627.078	207.892	1028.44	763.113	-93.0841	1023.86	737.899	73.0363	968.211	644.022	363.762	705.79	691.356	328.742	823.758	434.612	250.98	833.773	463.521	254.354	869.232	372.631	223.317	879.163	285.842	-221.625	679.468	690.947	-161.329	738.424	424.262	-81.07	755.118	437.345	-89.9962	763.73	341.241	-55.5075	733.552	256.661
294	2.93	69.9769	1186.69	589.181	138.323	1187.93	639.434	-4.6058	1169.77	627.297	207.91	1028.39	763.012	-93.1017	1023.78	737.892	73.0153	968.169	644.028	363.494	705.338	692.492	330.916	819.761	434.054	252.343	829.587	461.195	256.825	863.404	370.148	226.799	871.188	283.035	-221.641	679.485	690.988	-161.8	738.902	423.409	-81.0307	755.082	437.3	-90.0159	763.874	341.078	-55.478	733.516	256.681
295	2.94	69.7291	1186.6	589.408	138.1	1187.91	639.464	-4.81891	1169.72	627.553	207.96	1028.31	762.907	-93.108	1023.69	737.887	73.01	968.09	644.037	363.169	704.905	693.737	333.03	815.979	433.556	253.92	825.493	459.227	259.276	857.684	368.035	229.998	863.319	280.796	-221.66	679.469	690.978	-161.107	738.182	424.401	-80.9821	755.068	437.261	-90.0146	763.84	340.947	-55.4215	733.465	256.691
296	2.95	69.4219	1186.54	589.578	137.869	1187.89	639.502	-5.077	1169.7	627.817	207.981	1028.27	762.873	-93.1443	1023.63	737.902	72.9481	968.053	644.084	362.938	704.493	694.91	335.027	812.383	433.011	255.469	821.467	457.506	261.571	852.144	366.209	232.669	855.329	278.928	-221.693	679.419	690.914	-160.965	737.994	424.655	-81.0025	755.077	437.297	-90.0361	763.855	340.931	-55.4165	733.427	256.706
297	2.96	69.0118	1186.63	589.566	137.616	1187.93	639.513	-5.37985	1169.73	628.125	207.957	1028.27	762.82	-93.2199	1023.62	737.903	72.8221	968.027	644.091	362.726	704.089	696.132	336.868	808.855	432.66	256.902	817.52	456.169	263.636	846.856	364.603	235.5	847.99	277.035	-221.761	679.355	690.829	-161.389	738.379	424.096	-81.1058	755.113	437.365	-90.0709	763.869	341.084	-55.4825	733.441	256.689
298	2.97	68.6086	1186.77	589.468	137.352	1187.98	639.437	-5.66158	1169.75	628.338	207.935	1028.29	762.767	-93.2917	1023.63	737.873	72.699	968.052	644	362.583	703.669	697.204	338.558	805.421	432.57	258.308	813.577	455.095	265.587	841.757	363.256	238.246	841.08	275.284	-221.866	679.493	691.037	-161.926	738.886	423.334	-81.1986	755.179	437.394	-90.1106	763.873	341.22	-55.5556	733.5	256.676
299	2.98	68.29	1186.86	589.474	137.14	1188.02	639.348	-5.89856	1169.75	628.502	207.933	1028.28	762.692	-93.3462	1023.64	737.811	72.6241	968.07	643.873	362.453	703.299	698.425	340.19	802.096	432.532	259.614	809.773	454.075	267.401	836.872	362.058	240.909	834.607	273.792	-221.982	679.843	691.537	-161.302	738.19	424.417	-81.2692	755.235	437.379	-90.1101	763.762	341.266	-55.6012	733.529	256.639
300	2.99	67.9963	1186.9	589.528	136.952	1188.06	639.269	-6.08445	1169.73	628.674	207.929	1028.23	762.635	-93.387	1023.64	737.769	72.5732	968.092	643.749	362.294	702.974	699.613	341.745	798.864	432.491	260.891	806.144	453.109	269.08	832.288	360.977	243.535	828.588	272.335	-222.071	679.908	691.594	-161.157	738	424.68	-81.3266	755.28	437.346	-90.1097	763.73	341.298	-55.6156	733.533	256.64
301	3	67.6957	1186.98	589.504	136.77	1188.11	639.199	-6.24182	1169.75	628.804	207.945	1028.22	762.614	-93.4356	1023.64	737.72	72.5353	968.135	643.649	362.137	702.662	700.68	343.156	795.765	432.375	262.222	802.901	452.335	270.774	827.949	360.029	245.981	822.758	271.042	-222.141	679.8	691.328	-161.168	737.958	424.748	-81.3606	755.32	437.351	-90.1392	763.784	341.227	-55.6215	733.556	256.676
302	3.01	67.4492	1187	589.549	136.626	1188.16	639.151	-6.37604	1169.76	628.933	207.971	1028.19	762.578	-93.4367	1023.65	737.681	72.5594	968.153	643.587	361.902	702.372	701.847	344.536	792.75	432.433	263.515	799.868	451.738	272.539	823.768	359.179	248.33	816.885	270.283	-222.203	679.54	690.75	-161.188	737.97	424.725	-81.3693	755.337	437.332	-90.1737	763.896	341.073	-55.6172	733.579	256.684
303	3.02	67.2771	1186.96	589.69	136.515	1188.17	639.121	-6.49629	1169.74	629.077	208.008	1028.13	762.572	-93.403	1023.62	737.632	72.6262	968.097	643.677	361.653	702.091	702.84	345.852	789.899	432.696	264.76	797.072	451.312	274.215	819.673	358.489	250.713	811.359	269.495	-222.309	679.569	690.645	-161.578	738.359	424.018	-81.3491	755.321	437.339	-90.1942	763.997	341.027	-55.6056	733.565	256.716
304	3.03	67.1342	1186.9	589.848	136.411	1188.14	639.113	-6.59621	1169.71	629.227	208.066	1028.06	762.599	-93.3515	1023.57	737.588	72.6756	968	643.779	361.429	701.745	703.771	347.078	787.238	432.908	266.085	794.541	451.029	275.853	815.756	358.038	253.153	806.078	268.948	-222.436	679.605	690.621	-162.075	738.823	423.136	-81.3439	755.294	437.336	-90.1504	763.993	341.186	-55.5851	733.52	256.738
305	3.04	66.9724	1186.84	589.94	136.3	1188.09	639.038	-6.71023	1169.66	629.358	208.12	1027.99	762.595	-93.324	1023.54	737.529	72.714	967.9	643.828	361.225	701.391	704.731	348.209	784.818	433.035	267.641	792.27	450.939	277.362	812.03	357.478	255.484	801.011	268.302	-222.563	679.814	690.856	-161.819	738.525	423.512	-81.3731	755.275	437.325	-90.1325	763.93	341.24	-55.5748	733.485	256.709
306	3.05	66.8019	1186.81	590.019	136.177	1188.06	638.969	-6.84919	1169.62	629.532	208.142	1027.94	762.599	-93.3299	1023.53	737.497	72.7152	967.856	643.889	361.048	700.993	705.584	349.186	782.536	433.28	268.603	789.971	450.718	278.76	808.546	357.053	257.711	796.229	267.79	-222.694	680.047	691.177	-162.19	738.848	422.937	-81.4207	755.292	437.307	-90.1705	763.901	341.302	-55.6054	733.476	256.685
307	3.06	66.6011	1186.82	590.007	136.045	1188.07	638.919	-7.00183	1169.6	629.771	208.147	1027.94	762.641	-93.3499	1023.58	737.484	72.6707	967.882	643.944	360.841	700.581	706.439	350.102	780.339	433.673	269.37	787.746	450.482	280.09	805.358	356.856	259.76	791.831	267.545	-222.744	679.725	690.632	-161.567	738.166	424.211	-81.5233	755.342	437.355	-90.2529	763.79	341.412	-55.6851	733.513	256.68
308	3.07	66.445	1186.86	589.955	135.963	1188.1	638.856	-7.11283	1169.62	629.977	208.161	1027.95	762.649	-93.3522	1023.63	737.475	72.6591	967.946	643.898	360.632	700.242	707.339	351.022	778.278	434.163	270.261	785.654	450.473	281.316	802.455	356.763	261.596	787.911	267.504	-222.78	679.827	690.693	-161.436	738.019	424.577	-81.5983	755.416	437.39	-90.3025	763.805	341.414	-55.7421	733.555	256.709
309	3.08	66.3768	1186.9	589.865	135.941	1188.12	638.783	-7.13132	1169.62	630.062	208.221	1027.95	762.645	-93.3174	1023.65	737.46	72.7227	968.015	643.773	360.456	699.942	708.214	351.846	776.369	434.473	271.103	783.584	450.487	282.578	799.604	356.584	263.308	784.453	267.422	-222.795	680.038	690.918	-161.385	738.002	424.637	-81.5893	755.475	437.388	-90.2625	763.887	341.294	-55.7244	733.568	256.736
310	3.09	66.363	1186.92	589.802	135.972	1188.11	638.738	-7.09394	1169.63	630.131	208.291	1027.93	762.627	-93.2664	1023.64	737.42	72.8245	968.051	643.695	360.257	699.672	709.106	352.616	774.531	434.768	271.755	781.579	450.425	283.934	796.606	356.297	264.89	781.463	267.255	-222.802	679.855	690.547	-161.339	737.986	424.585	-81.548	755.495	437.366	-90.1991	763.947	341.188	-55.6899	733.573	256.692
311	3.1	66.3501	1186.9	589.848	135.983	1188.08	638.729	-7.07756	1169.63	630.224	208.368	1027.89	762.685	-93.2229	1023.62	737.428	72.9257	968.034	643.798	360.088	699.426	709.875	353.375	772.769	435.238	272.026	779.624	450.305	285.03	793.997	356.134	266.259	778.837	267.194	-222.855	679.886	690.489	-161.323	737.975	424.583	-81.5302	755.497	437.368	-90.1819	764.02	341.068	-55.6776	733.576	256.667
312	3.11	66.3191	1186.85	589.948	135.996	1188.05	638.769	-7.09929	1169.63	630.387	208.407	1027.86	762.764	-93.1733	1023.62	737.473	72.968	968.029	643.911	359.919	699.209	710.568	354.041	771.2	435.643	272.303	777.796	450.336	285.934	791.698	356.123	267.473	776.363	267.175	-222.922	679.958	690.49	-161.342	738.004	424.57	-81.5366	755.5	437.36	-90.2149	764.085	340.988	-55.6761	733.572	256.686
313	3.12	66.2641	1186.77	590.057	136.008	1188	638.788	-7.11838	1169.62	630.521	208.424	1027.82	762.811	-93.1395	1023.61	737.503	72.991	968.02	644.008	359.722	699.013	711.278	354.638	769.798	435.989	273.156	776.295	450.275	286.788	789.544	356.093	268.559	773.892	267.164	-222.973	679.996	690.476	-161.377	738.002	424.522	-81.5621	755.489	437.346	-90.27	764.074	340.995	-55.6906	733.554	256.708
314	3.13	66.2182	1186.67	590.217	136.028	1187.89	638.774	-7.12686	1169.59	630.655	208.458	1027.76	762.851	-93.1165	1023.57	737.542	73.0187	967.973	644.148	359.522	698.757	711.913	355.235	768.464	436.307	273.615	775.058	450.032	287.436	787.869	355.457	269.695	771.355	267.28	-223.045	680.186	690.745	-161.395	737.978	424.488	-81.5907	755.446	437.376	-90.2781	763.964	341.156	-55.703	733.524	256.686
315	3.14	66.2089	1186.57	590.398	136.066	1187.8	638.79	-7.10402	1169.56	630.761	208.525	1027.69	762.942	-93.0836	1023.54	737.566	73.0512	967.908	644.275	359.344	698.474	712.408	355.776	767.278	436.593	273.965	773.902	449.808	287.854	786.69	354.158	270.982	768.798	267.345	-223.101	680.583	691.347	-161.787	738.349	423.816	-81.6095	755.422	437.4	-90.2671	763.918	341.285	-55.6994	733.502	256.68
316	3.15	66.2025	1186.54	590.485	136.123	1187.75	638.812	-7.06178	1169.57	630.877	208.605	1027.65	763.049	-92.9717	1023.45	737.462	73.1108	967.888	644.344	359.174	698.21	712.81	356.307	766.168	436.962	274.529	772.538	449.86	288.691	784.959	353.802	272.422	766.36	267.302	-223.077	680.455	691.129	-162.277	738.836	422.961	-81.607	755.439	437.386	-90.2582	763.957	341.296	-55.6938	733.495	256.696
317	3.16	66.1933	1186.58	590.512	136.195	1187.74	638.831	-7.03339	1169.63	631.008	208.648	1027.64	763.162	-92.8409	1023.38	737.37	73.1485	967.96	644.367	358.97	697.998	713.213	356.819	765.127	437.329	275.041	771.347	449.808	289.598	783.212	353.594	273.988	764.114	267.225	-223.025	680.075	690.535	-161.641	738.209	424.115	-81.6199	755.488	437.386	-90.2703	763.922	341.283	-55.7128	733.531	256.71
318	3.17	66.2237	1186.66	590.559	136.264	1187.74	638.873	-7.00113	1169.72	631.161	208.704	1027.67	763.308	-92.8514	1023.47	737.525	73.2131	968.086	644.382	358.724	697.843	713.67	357.313	764.219	437.636	275.486	770.285	449.797	290.573	781.516	353.527	275.593	762.076	267.16	-222.989	680.013	690.391	-161.497	738.117	424.462	-81.6411	755.55	437.41	-90.2844	764.003	341.273	-55.7269	733.582	256.746
319	3.18	66.297	1186.73	590.53	136.357	1187.76	638.883	-6.92072	1169.81	631.283	208.768	1027.69	763.39	-92.6595	1023.36	737.297	73.3034	968.198	644.336	358.534	697.689	714.061	357.834	763.282	437.844	275.813	769.378	449.549	291.538	779.863	353.425	277.151	760.143	267.042	-222.963	680.051	690.375	-161.444	738.113	424.536	-81.6292	755.616	437.381	-90.2513	764.085	341.241	-55.7118	733.629	256.751
320	3.19	66.3864	1186.77	590.517	136.463	1187.74	638.885	-6.79325	1169.86	631.351	208.84	1027.68	763.429	-92.634	1023.39	737.373	73.3994	968.236	644.233	358.365	697.544	714.354	358.345	762.353	437.881	276.18	768.431	449.186	292.523	778.217	353.206	278.68	758.153	266.822	-222.968	680.124	690.429	-161.399	738.097	424.505	-81.6034	755.643	437.343	-90.1964	764.132	341.145	-55.6733	733.627	256.723
321	3.2	66.4358	1186.73	590.702	136.528	1187.7	638.898	-6.69528	1169.91	631.513	208.9	1027.67	763.511	-92.6676	1023.45	737.521	73.4707	968.226	644.206	358.191	697.405	714.6	358.868	761.409	437.967	276.661	767.336	448.991	293.41	776.627	353.02	280.055	756.133	266.613	-223.01	680.19	690.482	-161.379	738.074	424.462	-81.6094	755.639	437.324	-90.1699	764.101	341.16	-55.6546	733.589	256.703
322	3.21	66.4429	1186.67	590.953	136.561	1187.64	638.923	-6.63029	1169.95	631.782	208.938	1027.62	763.579	-92.5089	1023.28	737.303	73.5	968.189	644.255	358.002	697.275	714.841	359.336	760.472	438.053	276.891	766.435	448.639	294.322	775.089	352.852	281.363	754.17	266.406	-223.066	680.193	690.468	-161.395	738.052	424.448	-81.6513	755.611	437.352	-90.2157	764.002	341.339	-55.676	733.544	256.745
323	3.22	66.4262	1186.61	591.207	136.591	1187.58	638.989	-6.58733	1169.98	632.053	208.974	1027.57	763.635	-92.4571	1023.22	737.319	73.4761	968.137	644.41	357.817	697.146	715.079	359.735	759.541	438.066	277.2	765.394	448.348	295.137	773.62	352.693	282.708	752.209	266.215	-223.114	680.379	690.735	-161.47	738.04	424.464	-81.7059	755.581	437.407	-90.32	763.962	341.431	-55.7269	733.53	256.765
324	3.23	66.4487	1186.6	591.444	136.681	1187.55	639.109	-6.53508	1170.04	632.292	209.038	1027.53	763.714	-92.4068	1023.21	737.366	73.4715	968.099	644.468	357.675	697.03	715.313	360.145	758.673	438.104	277.475	764.401	448.015	295.915	772.119	352.571	284.054	750.251	266.113	-223.151	680.807	691.37	-161.521	738.025	424.475	-81.7611	755.576	437.436	-90.3786	763.973	341.474	-55.7551	733.513	256.76
325	3.24	66.5225	1186.68	591.559	136.833	1187.57	639.224	-6.46185	1170.13	632.502	209.148	1027.51	763.752	-92.3202	1023.22	737.389	73.5217	968.169	644.397	357.575	696.915	715.499	360.605	757.866	438.199	277.978	763.324	447.966	296.727	770.707	352.565	285.321	748.42	266.066	-223.099	680.747	691.222	-161.528	738.053	424.492	-81.7665	755.604	437.443	-90.379	764.043	341.445	-55.7424	733.519	256.788
326	3.25	66.6174	1186.79	591.505	136.99	1187.6	639.272	-6.35662	1170.25	632.617	209.264	1027.5	763.712	-92.2005	1023.26	737.372	73.6167	968.275	644.3	357.473	696.787	715.672	361.032	757.113	438.275	278.585	762.267	448.024	297.53	769.28	352.441	286.465	746.627	265.947	-223.032	680.432	690.676	-161.512	738.09	424.446	-81.7529	755.659	437.414	-90.3368	764.143	341.331	-55.7295	733.549	256.799
327	3.26	66.7106	1186.93	591.466	137.131	1187.67	639.297	-6.24208	1170.36	632.737	209.354	1027.52	763.677	-92.0976	1023.32	737.379	73.7114	968.354	644.152	357.4	696.66	715.785	361.421	756.41	438.279	278.895	761.443	447.735	298.214	767.929	352.32	287.402	744.84	265.744	-222.982	680.42	690.551	-161.517	738.138	424.43	-81.7611	755.757	437.379	-90.314	764.291	341.156	-55.7269	733.591	256.802
328	3.27	66.7668	1187.07	591.518	137.234	1187.71	639.364	-6.16736	1170.47	632.913	209.429	1027.54	763.709	-92.0122	1023.39	737.413	73.7713	968.422	644.1	357.334	696.591	715.947	361.773	755.614	438.318	278.813	760.725	447.345	298.846	766.479	352.235	288.159	743.125	265.532	-223.005	680.491	690.588	-161.579	738.191	424.465	-81.8144	755.84	437.407	-90.3376	764.366	341.144	-55.7457	733.627	256.815
329	3.28	66.8005	1187.1	591.733	137.288	1187.74	639.373	-6.12357	1170.56	633.105	209.479	1027.53	763.746	-91.976	1023.41	737.413	73.7955	968.447	644.113	357.259	696.559	716.08	362.043	754.79	438.372	278.73	759.649	447.466	299.304	764.967	351.996	288.702	741.286	265.312	-223.093	680.563	690.627	-161.646	738.207	424.49	-81.8922	755.871	437.455	-90.3758	764.363	341.238	-55.7786	733.625	256.826
330	3.29	66.8264	1187.08	591.926	137.343	1187.72	639.371	-6.05284	1170.61	633.295	209.519	1027.49	763.721	-91.9256	1023.39	737.426	73.8391	968.379	644.222	357.175	696.563	716.188	362.286	753.903	438.384	278.984	758.542	447.454	299.799	763.288	351.755	289.172	739.093	265.197	-223.208	680.599	690.613	-161.681	738.183	424.467	-81.9448	755.851	437.491	-90.3691	764.277	341.436	-55.7899	733.582	256.869
331	3.3	66.8635	1187.04	592.148	137.449	1187.66	639.418	-5.95384	1170.63	633.487	209.571	1027.43	763.704	-91.8481	1023.34	737.42	73.9018	968.247	644.379	357.129	696.577	716.29	362.595	752.914	438.375	279.26	757.857	446.905	300.311	761.523	351.505	289.567	737.357	265.199	-223.326	680.635	690.588	-161.711	738.138	424.445	-81.9832	755.801	437.509	-90.3626	764.165	341.669	-55.7655	733.509	256.936
332	3.31	66.8852	1187.04	592.302	137.563	1187.59	639.476	-5.86985	1170.68	633.708	209.619	1027.41	763.705	-91.7805	1023.3	737.404	73.9446	968.169	644.482	357.119	696.559	716.388	362.925	751.914	438.308	279.71	757.078	446.401	300.704	760.11	351.226	289.708	736.903	265.277	-223.426	680.707	690.596	-161.771	738.117	424.428	-82.0263	755.771	437.584	-90.3867	764.125	341.811	-55.7637	733.473	257.002
333	3.32	66.9179	1187.1	592.391	137.678	1187.57	639.51	-5.79807	1170.78	633.877	209.679	1027.4	763.722	-91.7072	1023.3	737.416	73.9776	968.176	644.508	357.111	696.473	716.487	363.21	750.902	438.17	279.656	756.164	446.352	301.05	759.248	351.125	289.756	736.735	265.243	-223.504	680.787	690.581	-161.827	738.136	424.455	-82.0978	755.81	437.629	-90.4372	764.199	341.802	-55.7888	733.48	257.068
334	3.33	66.9752	1187.2	592.407	137.801	1187.58	639.51	-5.68853	1170.9	633.97	209.774	1027.39	763.711	-91.6021	1023.31	737.42	74.0298	968.254	644.451	357.065	696.331	716.553	363.45	750.088	438.089	279.847	755.726	446.351	301.357	758.987	351.077	289.834	736.791	265.07	-223.534	680.897	690.604	-161.861	738.19	424.443	-82.1812	755.925	437.665	-90.4942	764.38	341.621	-55.7921	733.509	257.091
335	3.34	67.0512	1187.31	592.352	137.955	1187.58	639.553	-5.55638	1171.02	634.057	209.871	1027.38	763.712	-91.475	1023.35	737.399	74.1046	968.358	644.347	356.971	696.181	716.575	363.618	749.788	438.15	279.992	755.646	446.373	301.578	758.955	351.074	289.913	736.854	264.982	-223.574	681.026	690.632	-161.886	738.251	424.425	-82.2463	756.09	437.651	-90.5172	764.599	341.387	-55.7782	733.554	257.13
336	3.35	67.1486	1187.43	592.268	138.106	1187.58	639.566	-5.42119	1171.11	634.146	209.996	1027.39	763.768	-91.343	1023.38	737.337	74.183	968.438	644.218	356.833	695.986	716.494	363.679	749.816	438.186	280.012	755.721	446.286	301.676	758.896	351.043	289.937	736.884	264.933	-223.69	681.177	690.666	-161.906	738.281	424.432	-82.2968	756.224	437.594	-90.5017	764.77	341.269	-55.7763	733.588	257.148
337	3.36	67.2536	1187.49	592.29	138.242	1187.56	639.492	-5.31925	1171.18	634.243	210.104	1027.4	763.81	-91.2399	1023.42	737.277	74.2582	968.473	644.096	356.693	695.815	716.352	363.609	749.914	438.086	280.125	755.872	446.092	301.657	758.865	350.944	289.888	736.909	264.879	-223.853	681.308	690.637	-161.954	738.32	424.378	-82.3657	756.334	437.506	-90.4948	764.817	341.304	-55.796	733.61	257.147
338	3.37	67.3061	1187.49	592.399	138.332	1187.51	639.437	-5.24213	1171.22	634.408	210.148	1027.43	763.908	-91.1863	1023.43	737.264	74.2846	968.492	644.082	356.588	695.721	716.211	363.426	749.992	437.958	280.174	755.984	445.841	301.518	758.802	350.847	289.78	736.897	264.888	-224.092	681.451	690.605	-162.051	738.374	424.351	-82.5038	756.438	437.485	-90.5176	764.776	341.53	-55.8406	733.595	257.19
339	3.38	67.3149	1187.43	592.521	138.397	1187.44	639.475	-5.18425	1171.25	634.594	210.133	1027.49	764.091	-91.1616	1023.4	737.312	74.2921	968.464	644.226	356.523	695.725	716.126	363.185	750.022	437.863	279.786	755.92	445.725	301.29	758.675	350.791	289.624	736.844	264.966	-224.379	681.552	690.547	-162.174	738.42	424.326	-82.6632	756.5	437.56	-90.5645	764.705	341.82	-55.9014	733.581	257.298
340	3.39	67.3735	1187.36	592.679	138.487	1187.36	639.521	-5.09888	1171.25	634.781	210.114	1027.53	764.255	-91.1379	1023.34	737.341	74.3412	968.399	644.398	356.506	695.813	716.079	362.973	749.959	437.785	279.732	755.873	445.545	301.121	758.5	350.757	289.51	736.765	265.016	-224.672	681.667	690.478	-162.276	738.435	424.303	-82.8121	756.555	437.65	-90.611	764.695	342.003	-55.9333	733.553	257.412
341	3.4	67.5023	1187.28	592.864	138.639	1187.24	639.579	-4.9545	1171.26	634.935	210.127	1027.59	764.406	-91.0873	1023.28	737.342	74.4629	968.323	644.574	356.526	695.942	716.048	362.874	749.808	437.69	279.332	755.581	445.695	301.051	758.341	350.748	289.483	736.679	265.038	-224.966	681.836	690.473	-162.351	738.455	424.251	-82.8973	756.64	437.687	-90.6412	764.8	341.983	-55.8654	733.509	257.555
342	3.41	67.6576	1187.2	593.058	138.807	1187.13	639.628	-4.79892	1171.32	635.024	210.156	1027.67	764.571	-91.0201	1023.23	737.37	74.6181	968.257	644.765	356.572	696.093	716.036	362.842	749.637	437.615	279.227	755.368	445.744	301.04	758.255	350.741	289.489	736.647	265.046	-225.272	682.034	690.481	-162.835	738.881	423.39	-83.019	756.791	437.785	-90.6335	764.987	342.02	-55.7617	733.456	257.689
343	3.42	67.7858	1187.19	593.189	138.95	1187.06	639.709	-4.67652	1171.42	635.134	210.175	1027.79	764.702	-90.9685	1023.2	737.398	74.6906	968.29	644.814	356.66	696.279	716.121	362.832	749.515	437.571	279.176	755.229	445.76	301.05	758.198	350.764	289.491	736.663	265.059	-225.613	682.268	690.518	-163.469	739.437	422.342	-83.2243	757.053	437.891	-90.6666	765.306	342.087	-55.6847	733.455	257.83
344	3.43	67.8449	1187.31	593.117	139.036	1187.04	639.767	-4.60912	1171.55	635.227	210.171	1027.92	764.83	-90.9632	1023.16	737.448	74.6722	968.435	644.712	356.785	696.459	716.254	362.835	749.417	437.556	279.163	755.173	445.762	301.071	758.16	350.813	289.516	736.717	265.06	-226.038	682.485	690.565	-163.412	739.331	422.815	-83.4788	757.413	437.995	-90.7918	765.791	341.807	-55.6508	733.517	257.989
345	3.44	67.8565	1187.41	592.964	139.068	1187.03	639.808	-4.57848	1171.67	635.32	210.117	1028.02	764.912	-91.0062	1023.11	737.482	74.5961	968.584	644.545	356.933	696.597	716.36	362.875	749.275	437.58	279.18	755.116	445.742	301.106	758.126	350.857	289.526	736.774	265.045	-226.545	682.668	690.583	-164.43	740.124	421.296	-83.7866	757.837	438.114	-90.8685	766.258	342.004	-55.5921	733.579	258.185
346	3.45	67.824	1187.43	593.002	139.073	1187	639.872	-4.59593	1171.74	635.409	210.029	1028.1	764.944	-91.0792	1023.05	737.504	74.5093	968.607	644.56	357.106	696.74	716.449	362.939	749.054	437.598	279.227	755.017	445.783	301.153	758.064	350.888	289.516	736.819	265.03	-227.111	682.838	690.61	-164.941	740.428	420.865	-84.1555	758.264	438.227	-91.0247	766.75	342.196	-55.4497	733.614	258.517
347	3.46	67.7778	1187.41	593.086	139.06	1186.92	639.928	-4.63989	1171.81	635.476	209.941	1028.16	764.945	-91.1452	1022.97	737.51	74.4138	968.576	644.588	357.29	696.908	716.553	363.016	748.8	437.599	279.326	754.87	445.85	301.2	757.991	350.893	289.511	736.837	265.047	-227.765	682.974	690.571	-165.326	740.572	420.688	-84.5593	758.675	438.362	-91.125	767.123	342.42	-55.1571	733.639	258.888
348	3.47	67.7374	1187.37	593.182	139.041	1186.85	639.954	-4.66764	1171.86	635.582	209.877	1028.21	764.938	-91.1985	1022.89	737.523	74.3224	968.527	644.61	357.459	697.074	716.667	363.09	748.581	437.577	279.441	754.714	445.869	301.268	757.937	350.912	289.524	736.806	265.066	-228.425	683.131	690.509	-165.637	740.7	420.579	-84.9394	759.091	438.587	-91.1348	767.426	342.688	-54.7135	733.654	259.267
349	3.48	67.7197	1187.34	593.358	139.019	1186.81	640.003	-4.68624	1171.88	635.736	209.849	1028.27	764.932	-91.2403	1022.81	737.571	74.2882	968.461	644.693	357.634	697.253	716.795	363.171	748.39	437.577	279.592	754.538	445.981	301.363	757.912	350.986	289.592	736.749	265.095	-229.126	683.425	690.519	-165.889	740.885	420.472	-85.3074	759.556	438.882	-91.075	767.751	343.029	-54.163	733.67	259.644
350	3.49	67.7094	1187.29	593.615	139.014	1186.76	640.069	-4.7002	1171.9	635.861	209.834	1028.33	764.905	-91.2798	1022.76	737.613	74.2927	968.393	644.813	357.792	697.411	716.895	363.266	748.204	437.632	279.764	754.38	446.093	301.431	757.925	351.025	289.678	736.709	265.168	-229.91	683.819	690.632	-166.089	741.143	420.383	-85.6297	760.062	439.144	-90.9636	768.117	343.449	-53.5748	733.694	260.079
351	3.5	67.6757	1187.25	593.716	138.981	1186.7	640.035	-4.72044	1171.93	635.906	209.817	1028.39	764.87	-91.2869	1022.72	737.644	74.3058	968.338	644.872	357.944	697.557	717.001	363.367	748.014	437.668	279.9	754.254	446.113	301.493	757.926	351.037	289.743	736.692	265.253	-230.683	684.216	690.691	-166.253	741.451	420.259	-85.8654	760.593	439.264	-90.8505	768.549	343.78	-52.9763	733.754	260.629
352	3.51	67.59	1187.25	593.723	138.918	1186.66	639.979	-4.78212	1171.97	635.921	209.779	1028.47	764.828	-91.2981	1022.68	737.622	74.2915	968.334	644.83	358.103	697.705	717.094	363.465	747.876	437.712	280.003	754.181	446.137	301.551	757.917	351.04	289.768	736.699	265.281	-231.441	684.573	690.653	-166.431	741.805	420.197	-86.1646	761.244	439.441	-90.72	768.982	344.052	-52.3413	733.835	261.157
353	3.52	67.4062	1187.3	593.637	138.805	1186.65	639.918	-4.92985	1172.02	635.982	209.713	1028.55	764.778	-91.3515	1022.66	737.667	74.1857	968.346	644.785	358.246	697.844	717.147	363.507	747.787	437.76	280.023	754.132	446.169	301.57	757.919	351.084	289.767	736.699	265.323	-232.289	684.921	690.514	-166.65	742.209	420.137	-86.5912	762.097	439.749	-90.6116	769.446	344.282	-51.6711	733.888	261.659
354	3.53	67.1309	1187.37	593.507	138.631	1186.63	639.803	-5.15859	1172.08	636.028	209.603	1028.66	764.716	-91.4336	1022.63	737.698	74.0111	968.393	644.702	358.352	697.956	717.159	363.468	747.762	437.752	279.955	754.115	446.147	301.542	757.916	351.128	289.721	736.714	265.303	-233.198	685.233	690.335	-166.938	742.578	420.075	-87.2184	763.358	440.173	-90.5738	769.983	344.477	-50.9804	733.97	262.276
355	3.54	66.8425	1187.4	593.442	138.392	1186.64	639.638	-5.43465	1172.14	636.022	209.466	1028.79	764.662	-91.5544	1022.59	737.67	73.8385	968.444	644.578	358.402	698.052	717.166	363.409	747.739	437.727	279.885	754.109	446.104	301.499	757.871	351.143	289.649	736.77	265.237	-234.106	685.52	690.129	-167.24	742.825	420.085	-88.1298	765.297	440.727	-90.5779	770.507	344.658	-50.3063	734.109	263.012
[truncated: 465 more rows]

## Sheet: Trial02
PathFileType	4	(X/Y/Z)	Trial02.trc
DataRate	CameraRate	NumFrames	NumMarkers	Units	OrigDataRate	OrigDataStartFrame	OrigNumFrames
100	100	1069	16	mm	100	1	1069
Frame#	Time	nasion			r zyg pr			l zyg pr			r should			l should			sternum			r elbow			r ulna			r radius			r hand			r finger			l elbow			l ulna			l radius			l hand			l finger
[truncated: 1,070 more rows]

## Sheet: Trial03
PathFileType	4	(X/Y/Z)	Trial03.trc
[truncated: 938 more rows]
[truncated: 9 more columns]

## Sheet: Trial04
PathFileType	4	(X/Y/Z)	Trial04.trc
[truncated: 842 more rows]
[truncated: 3 more columns]

[truncated: 1 more sheets: Trial05]
