# Supplementary material for: Upper-Limb Kinematic Variables are correlated with Fugl-Meyer Assessment Sub Scales During a Hand-to-Mouth Functional Task in Post-Stroke Individuals
Source: Research Square preprint supplement (doi:10.21203/rs.3.rs-8270137/v1), 2025-12-16
Supplement: Supplementary file 13 [file Additional file 13.xls]

## Sheet: Static
PathFileType	4	(X/Y/Z)	Static.trc
DataRate	CameraRate	NumFrames	NumMarkers	Units	OrigDataRate	OrigDataStartFrame	OrigNumFrames
100	100	668	17	mm	100	1	668
Frame#	Time	nasion			r zyg pr			l zyg pr			r should			l should			sternum			r elbow			r ulna			r radius			r hand			r finger			l elbow			l ulna			l radius			l hand			l finger
		X1	Y1	Z1	X2	Y2	Z2	X3	Y3	Z3	X4	Y4	Z4	X5	Y5	Z5	X6	Y6	Z6	X7	Y7	Z7	X8	Y8	Z8	X9	Y9	Z9	X10	Y10	Z10	X11	Y11	Z11	X12	Y12	Z12	X13	Y13	Z13	X14	Y14	Z14	X15	Y15	Z15	X16	Y16	Z16
1	0	52.2721	1201.19	481.745	124.144	1200.73	524.217	-20.9351	1202.71	523.578	219.967	1037.39	651.752	-127.828	1038.54	677.488	31.5521	987.272	571.958	277.575	653.209	664.507	281.411	744.313	389.596	208.299	753.036	408.504	224.844	768.144	306.961	211.776	731.926	205.127	-203.385	652.748	645.443	-184.36	742.304	373.323	-118.172	756.377	398.624	-127.287	766.809	298.077	-99.7442	731.578	194.476
2	0.01	52.376	1201.02	481.95	124.223	1200.65	524.239	-20.8242	1202.57	523.674	220.006	1037.34	651.696	-127.758	1038.52	677.524	31.6091	987.118	572.174	277.584	653.214	664.559	281.442	744.232	389.664	208.349	752.935	408.634	224.896	768.065	307.026	211.816	731.872	205.207	-203.392	652.797	645.443	-184.343	742.266	373.384	-118.174	756.31	398.633	-127.342	766.794	298.049	-99.7342	731.534	194.483
3	0.02	52.4292	1200.9	482.026	124.257	1200.58	524.21	-20.7805	1202.46	523.674	220.022	1037.29	651.656	-127.728	1038.49	677.515	31.5984	986.995	572.26	277.586	653.204	664.566	281.434	744.181	389.684	208.319	752.878	408.649	224.901	768.027	307.076	211.807	731.831	205.22	-203.383	652.835	645.458	-184.361	742.243	373.413	-118.2	756.251	398.64	-127.389	766.759	298.059	-99.7533	731.502	194.49
4	0.03	52.4043	1200.83	482.005	124.257	1200.52	524.142	-20.7844	1202.43	523.635	220.037	1037.25	651.623	-127.721	1038.51	677.472	31.5654	986.945	572.241	277.585	653.174	664.557	281.384	744.154	389.648	208.24	752.875	408.574	224.858	768.041	307.046	211.756	731.818	205.155	-203.362	652.85	645.416	-184.404	742.23	373.408	-118.25	756.219	398.676	-127.439	766.732	298.102	-99.8019	731.498	194.474
5	0.04	52.3832	1200.85	481.889	124.277	1200.49	524.094	-20.7862	1202.46	523.605	220.061	1037.22	651.603	-127.725	1038.54	677.451	31.5232	986.967	572.1	277.586	653.11	664.538	281.333	744.16	389.613	208.174	752.893	408.535	224.786	768.095	306.988	211.717	731.808	205.12	-203.332	652.82	645.36	-184.454	742.233	373.407	-118.3	756.237	398.7	-127.474	766.698	298.131	-99.8466	731.496	194.488
6	0.05	52.4305	1200.95	481.696	124.336	1200.51	524.067	-20.764	1202.55	523.557	220.109	1037.21	651.567	-127.705	1038.61	677.418	31.5107	987.041	571.915	277.597	653.05	664.537	281.326	744.204	389.61	208.166	752.979	408.512	224.755	768.199	306.918	211.72	731.817	205.118	-203.313	652.793	645.334	-184.471	742.288	373.42	-118.318	756.305	398.676	-127.445	766.699	298.14	-99.8615	731.526	194.488
7	0.06	52.512	1201.05	481.493	124.432	1200.56	524.029	-20.6798	1202.64	523.422	220.168	1037.19	651.499	-127.643	1038.67	677.364	31.5682	987.1	571.768	277.604	652.995	664.49	281.334	744.272	389.579	208.191	753.051	408.468	224.743	768.272	306.858	211.756	731.853	205.116	-203.293	652.787	645.319	-184.452	742.338	373.352	-118.284	756.39	398.611	-127.398	766.72	298.117	-99.8414	731.561	194.452
8	0.07	52.6444	1201.12	481.363	124.531	1200.6	523.943	-20.5741	1202.69	523.287	220.229	1037.2	651.409	-127.575	1038.73	677.325	31.6539	987.155	571.643	277.596	652.944	664.428	281.369	744.314	389.567	208.227	753.09	408.447	224.758	768.3	306.865	211.792	731.891	205.108	-203.283	652.815	645.339	-184.411	742.371	373.342	-118.24	756.462	398.549	-127.363	766.77	298.09	-99.8117	731.604	194.433
9	0.08	52.7665	1201.15	481.31	124.596	1200.62	523.874	-20.4822	1202.7	523.226	220.278	1037.19	651.356	-127.519	1038.77	677.294	31.73	987.137	571.693	277.588	652.933	664.41	281.407	744.33	389.611	208.27	753.103	408.507	224.801	768.281	306.925	211.816	731.929	205.142	-203.271	652.868	645.363	-184.378	742.376	373.373	-118.196	756.477	398.564	-127.329	766.823	298.124	-99.7736	731.636	194.437
10	0.09	52.8337	1201.08	481.308	124.641	1200.58	523.812	-20.4022	1202.63	523.19	220.306	1037.17	651.318	-127.463	1038.75	677.247	31.7858	987.031	571.815	277.57	652.909	664.394	281.44	744.267	389.653	208.302	753.036	408.564	224.843	768.196	306.99	211.835	731.938	205.193	-203.282	652.923	645.421	-184.348	742.326	373.35	-118.155	756.424	398.595	-127.33	766.82	298.107	-99.7592	731.613	194.437
11	0.1	52.8631	1200.93	481.41	124.674	1200.49	523.794	-20.3446	1202.48	523.218	220.308	1037.1	651.269	-127.452	1038.69	677.17	31.8152	986.908	571.903	277.562	652.878	664.375	281.429	744.188	389.643	208.331	752.927	408.615	224.893	768.103	307.059	211.835	731.892	205.207	-203.301	652.956	645.467	-184.336	742.252	373.382	-118.159	756.323	398.632	-127.349	766.771	298.128	-99.7738	731.549	194.444
12	0.11	52.8669	1200.81	481.5	124.677	1200.41	523.763	-20.3426	1202.38	523.228	220.311	1037.05	651.238	-127.455	1038.68	677.142	31.8103	986.785	571.997	277.565	652.85	664.348	281.407	744.134	389.66	208.299	752.854	408.621	224.916	768.065	307.092	211.822	731.831	205.204	-203.298	652.969	645.504	-184.351	742.198	373.436	-118.201	756.242	398.693	-127.395	766.713	298.173	-99.7909	731.505	194.457
13	0.12	52.8372	1200.73	481.444	124.657	1200.34	523.674	-20.3674	1202.32	523.136	220.312	1037.01	651.197	-127.462	1038.66	677.079	31.7635	986.721	571.971	277.593	652.827	664.357	281.361	744.099	389.639	208.246	752.831	408.594	224.872	768.071	307.051	211.784	731.805	205.167	-203.291	652.982	645.498	-184.382	742.17	373.427	-118.249	756.218	398.716	-127.453	766.659	298.191	-99.8207	731.485	194.474
14	0.13	52.8255	1200.75	481.221	124.663	1200.33	523.504	-20.3746	1202.34	522.969	220.322	1037	651.121	-127.463	1038.7	677.01	31.7309	986.778	571.803	277.621	652.817	664.361	281.336	744.123	389.606	208.213	752.869	408.528	224.806	768.122	306.99	211.749	731.807	205.118	-203.285	652.954	645.434	-184.419	742.193	373.347	-118.278	756.265	398.655	-127.454	766.653	298.133	-99.8403	731.493	194.468
15	0.14	52.8451	1200.83	480.91	124.705	1200.35	523.344	-20.326	1202.41	522.781	220.35	1037.02	651.071	-127.435	1038.76	676.976	31.732	986.9	571.601	277.656	652.789	664.355	281.368	744.207	389.608	208.196	752.966	408.494	224.751	768.189	306.925	211.765	731.847	205.118	-203.265	652.911	645.372	-184.425	742.255	373.333	-118.267	756.345	398.622	-127.404	766.707	298.12	-99.8223	731.537	194.479
16	0.15	52.8969	1200.89	480.673	124.768	1200.37	523.206	-20.2614	1202.47	522.606	220.379	1037.03	651.034	-127.391	1038.8	676.934	31.7795	986.978	571.466	277.687	652.739	664.354	281.404	744.269	389.625	208.21	753.037	408.472	224.772	768.224	306.92	211.803	731.88	205.138	-203.259	652.865	645.326	-184.398	742.304	373.371	-118.239	756.415	398.597	-127.366	766.765	298.122	-99.7908	731.572	194.475
17	0.16	52.9693	1200.9	480.514	124.826	1200.36	523.119	-20.1955	1202.47	522.5	220.4	1037.04	650.994	-127.349	1038.82	676.874	31.8128	987	571.312	277.692	652.755	664.368	281.417	744.294	389.615	208.231	753.065	408.467	224.781	768.237	306.93	211.814	731.903	205.139	-203.277	652.867	645.337	-184.373	742.327	373.377	-118.216	756.454	398.548	-127.347	766.793	298.06	-99.7619	731.59	194.458
18	0.17	52.9958	1200.85	480.434	124.842	1200.32	523.053	-20.1815	1202.42	522.357	220.405	1037.04	650.934	-127.333	1038.81	676.806	31.83	986.946	571.318	277.695	652.772	664.38	281.417	744.274	389.61	208.262	753.049	408.506	224.786	768.238	306.939	211.816	731.918	205.144	-203.304	652.887	645.363	-184.378	742.31	373.365	-118.213	756.45	398.539	-127.35	766.787	298.053	-99.7574	731.583	194.453
19	0.18	52.9644	1200.68	480.47	124.812	1200.25	522.986	-20.2002	1202.3	522.314	220.39	1037.02	650.884	-127.346	1038.77	676.727	31.8073	986.838	571.433	277.685	652.776	664.349	281.395	744.221	389.614	208.259	752.982	408.547	224.788	768.188	306.97	211.786	731.898	205.129	-203.314	652.936	645.407	-184.391	742.25	373.361	-118.251	756.381	398.599	-127.399	766.759	298.075	-99.7819	731.561	194.455
20	0.19	52.8905	1200.47	480.479	124.78	1200.14	522.94	-20.2433	1202.16	522.31	220.341	1036.97	650.825	-127.381	1038.72	676.65	31.7673	986.698	571.517	277.686	652.779	664.314	281.355	744.169	389.604	208.231	752.904	408.567	224.787	768.111	307.031	211.745	731.866	205.126	-203.332	652.966	645.439	-184.431	742.194	373.39	-118.303	756.291	398.674	-127.456	766.702	298.117	-99.8199	731.517	194.452
21	0.2	52.8327	1200.33	480.383	124.77	1200.02	522.891	-20.2589	1202.04	522.247	220.305	1036.95	650.786	-127.412	1038.67	676.583	31.748	986.583	571.535	277.67	652.767	664.279	281.325	744.137	389.588	208.227	752.842	408.614	224.794	768.058	307.064	211.73	731.836	205.132	-203.354	652.958	645.466	-184.449	742.145	373.41	-118.317	756.223	398.737	-127.491	766.683	298.128	-99.8472	731.491	194.472
22	0.21	52.8631	1200.22	480.317	124.783	1199.96	522.804	-20.2501	1201.96	522.13	220.307	1036.95	650.745	-127.396	1038.62	676.522	31.7837	986.505	571.576	277.662	652.742	664.236	281.333	744.113	389.608	208.255	752.801	408.612	224.826	768.051	307.053	211.753	731.811	205.14	-203.362	652.929	645.476	-184.428	742.121	373.379	-118.296	756.193	398.759	-127.488	766.68	298.136	-99.8431	731.487	194.474
23	0.22	52.9164	1200.18	480.172	124.79	1199.96	522.681	-20.2307	1201.91	521.982	220.329	1036.95	650.687	-127.371	1038.61	676.456	31.8166	986.505	571.498	277.673	652.726	664.21	281.383	744.117	389.647	208.293	752.831	408.587	224.851	768.052	307.019	211.801	731.82	205.177	-203.352	652.88	645.469	-184.404	742.14	373.375	-118.259	756.215	398.723	-127.445	766.701	298.134	-99.813	731.502	194.485
24	0.23	52.9221	1200.21	479.894	124.811	1199.99	522.573	-20.203	1201.92	521.839	220.35	1036.98	650.638	-127.354	1038.63	676.411	31.8577	986.583	571.268	277.699	652.714	664.22	281.427	744.172	389.64	208.319	752.916	408.583	224.828	768.1	306.974	211.837	731.866	205.195	-203.302	652.822	645.432	-184.37	742.182	373.365	-118.214	756.296	398.633	-127.386	766.749	298.086	-99.7893	731.539	194.459
25	0.24	52.8728	1200.27	479.616	124.81	1200.05	522.465	-20.2133	1201.94	521.701	220.37	1037.03	650.609	-127.351	1038.67	676.37	31.8559	986.683	571.011	277.749	652.703	664.239	281.44	744.25	389.629	208.326	752.993	408.584	224.79	768.185	306.931	211.854	731.908	205.192	-203.246	652.744	645.375	-184.362	742.252	373.381	-118.212	756.395	398.587	-127.365	766.786	298.107	-99.774	731.577	194.461
26	0.25	52.7975	1200.28	479.465	124.776	1200.07	522.356	-20.2679	1201.93	521.598	220.361	1037.03	650.571	-127.37	1038.7	676.333	31.8307	986.71	570.884	277.789	652.71	664.246	281.428	744.321	389.604	208.295	753.053	408.532	224.756	768.275	306.897	211.844	731.925	205.176	-203.205	652.693	645.361	-184.379	742.281	373.388	-118.243	756.454	398.578	-127.363	766.793	298.168	-99.7818	731.601	194.455
27	0.26	52.7443	1200.2	479.388	124.726	1200.03	522.277	-20.338	1201.89	521.527	220.332	1037.02	650.507	-127.392	1038.69	676.285	31.7906	986.687	570.834	277.818	652.709	664.243	281.396	744.342	389.608	208.276	753.061	408.519	224.75	768.295	306.905	211.821	731.914	205.173	-203.196	652.674	645.344	-184.392	742.262	373.386	-118.276	756.437	398.597	-127.386	766.781	298.166	-99.8171	731.591	194.462
28	0.27	52.685	1200.07	479.325	124.685	1199.96	522.186	-20.3835	1201.76	521.495	220.31	1036.97	650.441	-127.417	1038.66	676.232	31.7527	986.607	570.872	277.821	652.681	664.201	281.379	744.283	389.595	208.249	753.007	408.53	224.751	768.269	306.917	211.795	731.89	205.155	-203.19	652.684	645.384	-184.398	742.203	373.406	-118.282	756.373	398.649	-127.417	766.739	298.156	-99.8411	731.553	194.464
29	0.28	52.6585	1199.88	479.392	124.65	1199.83	522.111	-20.4149	1201.62	521.494	220.305	1036.91	650.393	-127.425	1038.62	676.188	31.7389	986.457	570.997	277.818	652.636	664.138	281.382	744.186	389.604	208.254	752.893	408.592	224.785	768.18	306.969	211.775	731.862	205.138	-203.194	652.743	645.484	-184.411	742.13	373.468	-118.277	756.273	398.719	-127.431	766.686	298.182	-99.8318	731.507	194.48
30	0.29	52.6461	1199.71	479.481	124.663	1199.68	522.099	-20.4391	1201.52	521.472	220.294	1036.87	650.336	-127.423	1038.57	676.155	31.7264	986.311	571.133	277.816	652.604	664.088	281.397	744.111	389.64	208.295	752.761	408.684	224.84	768.049	307.066	211.789	731.82	205.185	-203.184	652.81	645.608	-184.395	742.068	373.49	-118.256	756.19	398.762	-127.453	766.655	298.186	-99.8241	731.464	194.492
31	0.3	52.6548	1199.61	479.509	124.702	1199.57	522.043	-20.4433	1201.48	521.441	220.29	1036.86	650.262	-127.419	1038.56	676.128	31.7288	986.243	571.179	277.822	652.588	664.061	281.426	744.1	389.682	208.354	752.705	408.754	224.863	767.984	307.125	211.828	731.802	205.236	-203.175	652.829	645.645	-184.373	742.067	373.489	-118.238	756.173	398.743	-127.465	766.694	298.178	-99.8136	731.449	194.503
32	0.31	52.6698	1199.63	479.366	124.705	1199.56	521.917	-20.4396	1201.49	521.364	220.281	1036.87	650.169	-127.409	1038.59	676.093	31.7235	986.294	571.017	277.835	652.581	664.099	281.455	744.141	389.691	208.385	752.753	408.762	224.844	767.996	307.092	211.838	731.832	205.23	-203.172	652.813	645.615	-184.372	742.097	373.483	-118.239	756.226	398.705	-127.451	766.739	298.167	-99.7927	731.48	194.514
33	0.32	52.6529	1199.7	479.103	124.665	1199.61	521.732	-20.43	1201.53	521.201	220.269	1036.89	650.073	-127.428	1038.65	676.045	31.6739	986.444	570.691	277.844	652.573	664.1	281.451	744.192	389.672	208.338	752.863	408.66	224.813	768.073	306.996	211.832	731.867	205.216	-203.155	652.781	645.571	-184.364	742.133	373.465	-118.228	756.322	398.657	-127.421	766.759	298.191	-99.7941	731.533	194.497
34	0.33	52.6223	1199.74	478.883	124.582	1199.65	521.495	-20.4578	1201.53	521.075	220.23	1036.9	649.989	-127.462	1038.68	676.001	31.6039	986.52	570.503	277.85	652.563	664.088	281.403	744.244	389.621	208.283	752.957	408.567	224.768	768.182	306.921	211.826	731.876	205.181	-203.139	652.75	645.532	-184.381	742.169	373.409	-118.248	756.401	398.607	-127.407	766.762	298.136	-99.817	731.56	194.471
35	0.34	52.5853	1199.71	478.805	124.501	1199.64	521.341	-20.5384	1201.53	520.981	220.196	1036.92	649.935	-127.511	1038.71	675.937	31.5356	986.5	570.484	277.85	652.567	664.09	281.337	744.288	389.584	208.221	753.007	408.506	224.71	768.253	306.883	211.797	731.865	205.128	-203.146	652.709	645.447	-184.434	742.205	373.378	-118.317	756.445	398.539	-127.437	766.749	298.105	-99.8607	731.57	194.434
36	0.35	52.5284	1199.63	478.812	124.46	1199.57	521.272	-20.6025	1201.47	520.957	220.153	1036.93	649.884	-127.574	1038.7	675.889	31.4753	986.446	570.49	277.838	652.594	664.093	281.289	744.282	389.548	208.161	753.007	408.478	224.651	768.268	306.857	211.752	731.851	205.101	-203.165	652.701	645.41	-184.484	742.199	373.368	-118.393	756.418	398.557	-127.498	766.713	298.099	-99.9089	731.559	194.425
37	0.36	52.5224	1199.53	478.879	124.47	1199.47	521.268	-20.6061	1201.36	521.012	220.115	1036.93	649.846	-127.607	1038.69	675.881	31.4188	986.357	570.526	277.837	652.619	664.052	281.267	744.247	389.531	208.137	752.986	408.491	224.641	768.237	306.893	211.712	731.857	205.089	-203.196	652.732	645.439	-184.507	742.165	373.389	-118.419	756.375	398.658	-127.548	766.704	298.162	-99.9282	731.541	194.462
38	0.37	52.5628	1199.43	478.955	124.549	1199.35	521.356	-20.5702	1201.29	521.011	220.113	1036.93	649.819	-127.59	1038.66	675.906	31.4235	986.297	570.563	277.82	652.642	664.026	281.303	744.203	389.582	208.2	752.936	408.548	224.704	768.161	306.984	211.721	731.864	205.113	-203.247	652.76	645.461	-184.489	742.129	373.443	-118.385	756.326	398.735	-127.553	766.718	298.178	-99.9084	731.525	194.481
39	0.38	52.6744	1199.35	478.938	124.655	1199.24	521.383	-20.5059	1201.23	520.907	220.135	1036.92	649.767	-127.54	1038.63	675.872	31.4894	986.26	570.546	277.798	652.675	664.054	281.366	744.181	389.596	208.307	752.88	408.644	224.792	768.073	307.04	211.778	731.848	205.129	-203.304	652.793	645.492	-184.438	742.108	373.407	-118.318	756.284	398.7	-127.497	766.752	298.101	-99.8594	731.51	194.472
40	0.39	52.7682	1199.3	478.903	124.722	1199.18	521.389	-20.4422	1201.2	520.812	220.152	1036.92	649.708	-127.515	1038.62	675.844	31.5445	986.266	570.476	277.813	652.698	664.088	281.401	744.184	389.577	208.345	752.865	408.62	224.836	768.056	306.997	211.827	731.863	205.127	-203.34	652.818	645.532	-184.391	742.097	373.378	-118.243	756.281	398.649	-127.447	766.788	298.052	-99.8054	731.508	194.436
41	0.4	52.7895	1199.29	478.84	124.723	1199.18	521.358	-20.4343	1201.19	520.754	220.155	1036.93	649.691	-127.523	1038.64	675.858	31.5433	986.293	570.423	277.831	652.677	664.075	281.417	744.213	389.589	208.343	752.91	408.597	224.838	768.082	306.998	211.823	731.892	205.152	-203.352	652.806	645.518	-184.387	742.113	373.396	-118.25	756.338	398.659	-127.428	766.804	298.098	-99.7948	731.54	194.458
42	0.41	52.7426	1199.31	478.79	124.662	1199.22	521.264	-20.484	1201.15	520.74	220.128	1036.93	649.663	-127.566	1038.67	675.849	31.4857	986.306	570.396	277.875	652.651	664.053	281.402	744.243	389.606	208.305	752.951	408.549	224.772	768.15	306.94	211.793	731.911	205.158	-203.331	652.749	645.437	-184.425	742.143	373.409	-118.309	756.367	398.687	-127.464	766.801	298.14	-99.8243	731.562	194.468
43	0.42	52.6666	1199.3	478.74	124.565	1199.25	521.121	-20.5511	1201.12	520.74	220.097	1036.93	649.656	-127.636	1038.69	675.797	31.4024	986.297	570.334	277.927	652.622	664.031	281.358	744.262	389.568	208.23	752.986	408.49	224.694	768.22	306.911	211.763	731.907	205.13	-203.302	652.686	645.343	-184.477	742.165	373.395	-118.374	756.394	398.661	-127.505	766.775	298.175	-99.8606	731.542	194.471
44	0.43	52.6301	1199.28	478.726	124.52	1199.25	521.11	-20.5878	1201.07	520.742	220.071	1036.92	649.672	-127.68	1038.68	675.789	31.3521	986.261	570.322	277.98	652.618	664.05	281.33	744.274	389.567	208.183	753.002	408.499	224.665	768.268	306.905	211.75	731.872	205.151	-203.287	652.635	645.272	-184.504	742.157	373.429	-118.439	756.395	398.684	-127.531	766.745	298.207	-99.8834	731.538	194.501
45	0.44	52.6105	1199.24	478.675	124.493	1199.22	521.081	-20.5934	1201.04	520.72	220.055	1036.92	649.658	-127.689	1038.67	675.761	31.3287	986.263	570.285	278.016	652.631	664.062	281.32	744.268	389.546	208.183	752.999	408.514	224.681	768.265	306.896	211.749	731.841	205.143	-203.289	652.636	645.292	-184.501	742.137	373.415	-118.449	756.369	398.686	-127.525	766.709	298.179	-99.8843	731.532	194.491
46	0.45	52.6145	1199.21	478.626	124.498	1199.17	521.013	-20.5758	1201.01	520.661	220.052	1036.92	649.625	-127.692	1038.66	675.736	31.3355	986.268	570.291	278.004	652.609	663.982	281.33	744.248	389.511	208.216	752.971	408.503	224.717	768.206	306.894	211.746	731.844	205.104	-203.307	652.666	645.361	-184.475	742.123	373.394	-118.405	756.345	398.671	-127.492	766.707	298.14	-99.8876	731.526	194.445
47	0.46	52.6408	1199.17	478.647	124.555	1199.09	521.057	-20.5555	1201.01	520.645	220.057	1036.93	649.61	-127.684	1038.65	675.746	31.3535	986.261	570.308	277.985	652.621	663.95	281.362	744.232	389.547	208.273	752.926	408.564	224.744	768.148	306.95	211.755	731.87	205.125	-203.318	652.703	645.402	-184.438	742.122	373.389	-118.36	756.353	398.657	-127.482	766.741	298.108	-99.8698	731.534	194.446
48	0.47	52.6609	1199.14	478.705	124.601	1199.03	521.148	-20.5443	1201.01	520.675	220.055	1036.95	649.611	-127.683	1038.65	675.783	31.3737	986.26	570.335	277.959	652.675	663.965	281.392	744.23	389.589	208.315	752.909	408.652	224.766	768.107	307.03	211.773	731.886	205.176	-203.329	652.737	645.43	-184.435	742.119	373.441	-118.338	756.356	398.679	-127.493	766.778	298.128	-99.8533	731.552	194.466
49	0.48	52.6636	1199.13	478.71	124.608	1199	521.193	-20.5454	1201.01	520.707	220.037	1036.97	649.598	-127.694	1038.67	675.794	31.3752	986.269	570.331	277.939	652.698	663.957	281.406	744.235	389.607	208.317	752.904	408.66	224.754	768.075	307.046	211.78	731.909	205.165	-203.335	652.781	645.48	-184.44	742.12	373.416	-118.33	756.359	398.707	-127.501	766.805	298.141	-99.844	731.561	194.445
50	0.49	52.6594	1199.11	478.743	124.596	1198.99	521.184	-20.5436	1201	520.692	220.026	1036.98	649.577	-127.704	1038.66	675.787	31.3457	986.268	570.298	277.948	652.664	663.924	281.391	744.225	389.588	208.327	752.905	408.641	224.755	768.077	306.993	211.771	731.91	205.145	-203.33	652.773	645.489	-184.431	742.107	373.424	-118.321	756.355	398.704	-127.489	766.806	298.114	-99.851	731.55	194.437
51	0.5	52.6285	1199.11	478.77	124.57	1199	521.177	-20.5632	1200.98	520.693	220.025	1036.98	649.592	-127.716	1038.64	675.776	31.3198	986.229	570.332	277.982	652.657	663.939	281.376	744.221	389.589	208.286	752.919	408.616	224.755	768.134	306.957	211.761	731.879	205.168	-203.307	652.735	645.48	-184.44	742.092	373.431	-118.336	756.34	398.727	-127.484	766.775	298.121	-99.8567	731.541	194.454
52	0.51	52.5989	1199.1	478.793	124.513	1199.01	521.166	-20.6105	1200.99	520.695	220.019	1036.97	649.596	-127.738	1038.65	675.773	31.2764	986.221	570.346	278.027	652.651	663.967	281.353	744.232	389.586	208.226	752.944	408.563	224.709	768.203	306.922	211.753	731.855	205.155	-203.269	652.673	645.405	-184.471	742.092	373.424	-118.391	756.337	398.717	-127.509	766.739	298.201	-99.8707	731.533	194.448
53	0.52	52.5707	1199.11	478.781	124.453	1199.03	521.107	-20.6521	1201	520.706	220.004	1036.97	649.565	-127.766	1038.65	675.763	31.2481	986.218	570.359	278.078	652.649	663.973	281.324	744.23	389.555	208.189	752.954	408.519	224.692	768.215	306.925	211.747	731.838	205.128	-203.246	652.616	645.314	-184.491	742.086	373.398	-118.435	756.345	398.709	-127.534	766.721	298.198	-99.9002	731.524	194.455
54	0.53	52.5716	1199.12	478.819	124.471	1199.04	521.174	-20.654	1200.99	520.703	220.019	1036.97	649.571	-127.769	1038.64	675.781	31.2367	986.224	570.369	278.095	652.663	663.992	281.336	744.224	389.562	208.205	752.94	408.527	224.696	768.196	306.938	211.744	731.838	205.14	-203.239	652.616	645.329	-184.473	742.074	373.412	-118.435	756.354	398.717	-127.539	766.716	298.176	-99.8944	731.53	194.471
55	0.54	52.589	1199.12	478.825	124.49	1199.05	521.21	-20.638	1200.99	520.712	220.032	1036.99	649.56	-127.757	1038.65	675.781	31.2681	986.255	570.366	278.084	652.693	664.013	281.377	744.231	389.589	208.234	752.94	408.554	224.695	768.184	306.946	211.753	731.851	205.139	-203.239	652.625	645.355	-184.462	742.083	373.427	-118.385	756.367	398.693	-127.514	766.752	298.152	-99.8584	731.535	194.477
56	0.55	52.6056	1199.14	478.813	124.514	1199.05	521.205	-20.6088	1201	520.687	220.036	1037.01	649.533	-127.739	1038.66	675.769	31.3186	986.288	570.291	278.052	652.749	664.063	281.393	744.243	389.574	208.262	752.94	408.567	224.718	768.15	306.945	211.773	731.878	205.121	-203.26	652.667	645.386	-184.426	742.099	373.406	-118.335	756.387	398.668	-127.478	766.794	298.114	-99.8337	731.549	194.47
57	0.56	52.6307	1199.2	478.767	124.553	1199.07	521.224	-20.5873	1201.02	520.674	220.031	1037.02	649.5	-127.73	1038.69	675.769	31.3432	986.337	570.223	278.023	652.767	664.061	281.387	744.267	389.557	208.272	752.944	408.541	224.735	768.135	306.918	211.773	731.912	205.116	-203.302	652.707	645.43	-184.387	742.107	373.393	-118.301	756.406	398.638	-127.452	766.825	298.047	-99.8082	731.573	194.45
58	0.57	52.6313	1199.22	478.722	124.535	1199.1	521.193	-20.6018	1201.04	520.689	220.036	1037.04	649.502	-127.737	1038.7	675.765	31.3436	986.359	570.179	278.021	652.761	663.989	281.376	744.28	389.551	208.282	752.956	408.553	224.736	768.148	306.929	211.773	731.933	205.126	-203.338	652.76	645.48	-184.392	742.122	373.408	-118.308	756.413	398.622	-127.459	766.849	298.079	-99.8206	731.593	194.439
59	0.58	52.5883	1199.2	478.764	124.509	1199.11	521.202	-20.6376	1201.03	520.708	220.024	1037.04	649.488	-127.761	1038.71	675.765	31.3199	986.338	570.23	278.027	652.743	663.949	281.347	744.279	389.525	208.271	752.96	408.553	224.732	768.166	306.953	211.759	731.931	205.135	-203.352	652.784	645.485	-184.426	742.118	373.424	-118.342	756.401	398.662	-127.473	766.838	298.157	-99.842	731.586	194.46
60	0.59	52.5251	1199.16	478.807	124.462	1199.1	521.176	-20.6782	1201	520.733	220.001	1037.02	649.459	-127.78	1038.72	675.73	31.2719	986.287	570.301	278.057	652.744	663.966	281.321	744.279	389.514	208.235	752.935	408.512	224.706	768.17	306.908	211.73	731.909	205.103	-203.348	652.773	645.435	-184.444	742.09	373.416	-118.374	756.374	398.69	-127.502	766.771	298.218	-99.8591	731.553	194.48
61	0.6	52.4937	1199.13	478.751	124.407	1199.08	521.109	-20.7007	1200.96	520.724	219.989	1037	649.469	-127.808	1038.7	675.692	31.2366	986.252	570.313	278.103	652.742	663.954	281.295	744.268	389.509	208.206	752.928	408.51	224.678	768.181	306.891	211.715	731.873	205.078	-203.356	652.753	645.408	-184.469	742.073	373.388	-118.411	756.358	398.693	-127.533	766.713	298.201	-99.8837	731.533	194.469
62	0.61	52.4959	1199.11	478.775	124.394	1199.06	521.1	-20.7208	1200.95	520.768	219.996	1036.99	649.47	-127.823	1038.7	675.683	31.2093	986.255	570.32	278.122	652.694	663.894	281.303	744.251	389.521	208.206	752.928	408.546	224.677	768.193	306.911	211.719	731.843	205.096	-203.364	652.723	645.368	-184.498	742.066	373.428	-118.441	756.34	398.701	-127.535	766.687	298.187	-99.8989	731.523	194.501
63	0.62	52.5085	1199.11	478.776	124.435	1199.03	521.089	-20.7152	1200.95	520.778	220.013	1037	649.463	-127.812	1038.72	675.698	31.2299	986.295	570.285	278.156	652.679	663.891	281.337	744.23	389.549	208.228	752.908	408.555	224.681	768.17	306.901	211.741	731.842	205.128	-203.372	652.704	645.341	-184.491	742.079	373.459	-118.426	756.347	398.685	-127.519	766.708	298.157	-99.888	731.527	194.504
64	0.63	52.5394	1199.12	478.678	124.489	1199	521.111	-20.6746	1200.95	520.72	220.033	1037.02	649.458	-127.782	1038.75	675.693	31.2574	986.339	570.205	278.173	652.702	663.921	281.373	744.235	389.564	208.247	752.914	408.557	224.705	768.132	306.95	211.763	731.867	205.153	-203.386	652.733	645.343	-184.456	742.071	373.406	-118.379	756.355	398.648	-127.496	766.758	298.101	-99.8674	731.543	194.454
65	0.64	52.5949	1199.09	478.688	124.529	1198.97	521.097	-20.6094	1200.96	520.644	220.038	1037.02	649.412	-127.762	1038.77	675.669	31.2987	986.377	570.144	278.141	652.719	663.923	281.394	744.232	389.562	208.281	752.903	408.596	224.732	768.101	306.965	211.766	731.887	205.162	-203.428	652.771	645.355	-184.424	742.078	373.358	-118.34	756.356	398.646	-127.476	766.791	298.084	-99.8508	731.547	194.429
66	0.65	52.627	1199.03	478.719	124.569	1198.94	521.068	-20.5875	1200.94	520.595	220.034	1037.02	649.378	-127.749	1038.79	675.643	31.308	986.392	570.104	278.11	652.688	663.841	281.407	744.221	389.567	208.298	752.892	408.593	224.766	768.07	306.98	211.771	731.88	205.161	-203.475	652.822	645.406	-184.408	742.085	373.348	-118.333	756.36	398.666	-127.47	766.799	298.074	-99.8469	731.542	194.458
67	0.66	52.6198	1199.01	478.635	124.562	1198.93	520.998	-20.5885	1200.92	520.577	220.029	1037.01	649.358	-127.769	1038.8	675.627	31.2935	986.364	570.131	278.106	652.695	663.833	281.377	744.225	389.534	208.29	752.883	408.565	224.739	768.078	306.98	211.749	731.885	205.124	-203.512	652.885	645.492	-184.418	742.087	373.358	-118.359	756.368	398.671	-127.466	766.782	298.082	-99.8494	731.53	194.449
68	0.67	52.5925	1199.05	478.577	124.525	1198.96	520.95	-20.599	1200.93	520.592	220.018	1037.02	649.356	-127.811	1038.84	675.625	31.2586	986.351	570.177	278.107	652.722	663.874	281.339	744.255	389.527	208.248	752.913	408.553	224.681	768.15	306.94	211.716	731.9	205.099	-203.549	652.909	645.504	-184.459	742.103	373.385	-118.416	756.411	398.666	-127.508	766.785	298.129	-99.8767	731.55	194.465
69	0.68	52.5846	1199.08	478.545	124.495	1198.98	520.883	-20.6041	1200.94	520.577	220.004	1037.03	649.342	-127.841	1038.86	675.597	31.2436	986.37	570.173	278.118	652.714	663.878	281.298	744.305	389.495	208.204	752.966	408.504	224.642	768.215	306.905	211.703	731.898	205.099	-203.578	652.887	645.459	-184.502	742.126	373.394	-118.477	756.436	398.68	-127.526	766.78	298.145	-99.9088	731.568	194.463
70	0.69	52.6037	1199.09	478.443	124.51	1199	520.801	-20.5716	1200.93	520.504	220.01	1037.02	649.295	-127.835	1038.88	675.56	31.2517	986.399	570.13	278.156	652.67	663.857	281.294	744.337	389.463	208.188	752.995	408.46	224.638	768.254	306.855	211.71	731.895	205.068	-203.579	652.86	645.397	-184.518	742.135	373.37	-118.494	756.456	398.649	-127.508	766.772	298.12	-99.9115	731.577	194.425
71	0.7	52.6517	1199.06	478.354	124.558	1198.97	520.768	-20.5194	1200.91	520.375	220.016	1037	649.241	-127.823	1038.88	675.517	31.2758	986.392	570.078	278.192	652.657	663.862	281.323	744.301	389.49	208.208	752.979	408.499	224.672	768.253	306.83	211.741	731.876	205.065	-203.565	652.817	645.308	-184.495	742.115	373.349	-118.451	756.44	398.6	-127.476	766.755	298.088	-99.8887	731.552	194.418
72	0.71	52.7051	1199	478.371	124.636	1198.89	520.825	-20.4784	1200.87	520.354	220.029	1036.98	649.229	-127.808	1038.88	675.483	31.2812	986.357	570.078	278.211	652.656	663.89	281.363	744.231	389.547	208.252	752.931	408.562	224.699	768.18	306.858	211.758	731.854	205.106	-203.575	652.81	645.273	-184.461	742.086	373.361	-118.415	756.388	398.643	-127.468	766.757	298.073	-99.8701	731.527	194.433
73	0.72	52.7542	1198.91	478.485	124.712	1198.82	520.909	-20.4681	1200.86	520.371	220.041	1036.97	649.225	-127.806	1038.86	675.462	31.2945	986.346	570.047	278.193	652.624	663.848	281.417	744.18	389.607	208.289	752.881	408.612	224.733	768.105	306.958	211.79	731.842	205.181	-203.61	652.827	645.28	-184.445	742.069	373.362	-118.395	756.348	398.718	-127.487	766.771	298.091	-99.8627	731.519	194.468
74	0.73	52.7794	1198.83	478.533	124.741	1198.77	520.893	-20.4596	1200.84	520.348	220.044	1036.98	649.184	-127.813	1038.88	675.468	31.3071	986.343	570.033	278.169	652.633	663.828	281.441	744.164	389.646	208.314	752.856	408.64	224.742	768.063	307.042	211.804	731.836	205.231	-203.66	652.874	645.299	-184.461	742.072	373.384	-118.386	756.341	398.703	-127.511	766.806	298.108	-99.8624	731.522	194.463
75	0.74	52.7877	1198.81	478.47	124.747	1198.74	520.821	-20.4503	1200.84	520.296	220.041	1037	649.143	-127.823	1038.91	675.433	31.3	986.342	570.032	278.133	652.663	663.834	281.42	744.175	389.63	208.314	752.861	408.65	224.722	768.075	307.026	211.778	731.861	205.198	-203.716	652.956	645.374	-184.464	742.068	373.38	-118.396	756.34	398.673	-127.516	766.807	298.083	-99.8658	731.529	194.441
76	0.75	52.8103	1198.82	478.368	124.749	1198.75	520.735	-20.4204	1200.84	520.232	220.032	1037.02	649.133	-127.824	1038.95	675.377	31.2838	986.385	569.962	278.09	652.672	663.804	281.378	744.215	389.551	208.281	752.898	408.602	224.703	768.107	306.942	211.745	731.896	205.106	-203.787	653.029	645.441	-184.457	742.087	373.344	-118.405	756.361	398.658	-127.496	766.81	298.051	-99.8629	731.546	194.418
77	0.76	52.7768	1198.88	478.188	124.712	1198.8	520.566	-20.4093	1200.85	520.123	220.025	1037.03	649.069	-127.829	1038.98	675.317	31.2759	986.436	569.839	278.081	652.675	663.777	281.31	744.267	389.456	208.224	752.959	408.489	224.682	768.171	306.863	211.724	731.903	205.027	-203.825	653.075	645.506	-184.479	742.13	373.291	-118.426	756.428	398.594	-127.483	766.796	298.058	-99.872	731.555	194.4
78	0.77	52.7278	1198.94	478.028	124.663	1198.85	520.391	-20.4219	1200.85	520.045	220.029	1037.04	649.037	-127.846	1039.02	675.277	31.2532	986.487	569.747	278.108	652.681	663.78	281.248	744.328	389.383	208.179	753	408.407	224.638	768.257	306.847	211.701	731.896	205.003	-203.843	653.113	645.56	-184.508	742.171	373.287	-118.456	756.483	398.527	-127.502	766.79	298.062	-99.8958	731.572	194.393
79	0.78	52.7126	1198.95	478.006	124.653	1198.86	520.352	-20.4378	1200.85	520.047	220.034	1037.04	649.037	-127.868	1039.04	675.295	31.2497	986.497	569.789	278.158	652.703	663.834	281.238	744.357	389.416	208.151	753.011	408.4	224.594	768.29	306.878	211.688	731.893	205.041	-203.829	653.072	645.505	-184.541	742.192	373.316	-118.504	756.498	398.577	-127.535	766.783	298.094	-99.9034	731.576	194.42
80	0.79	52.7626	1198.9	478.08	124.685	1198.8	520.403	-20.4287	1200.82	520.085	220.058	1037.03	649.032	-127.858	1039.04	675.325	31.2639	986.478	569.815	278.21	652.672	663.855	281.289	744.324	389.494	208.187	752.977	408.48	224.601	768.255	306.897	211.704	731.889	205.098	-203.798	653.001	645.406	-184.538	742.163	373.364	-118.504	756.47	398.619	-127.543	766.793	298.128	-99.8993	731.55	194.481
81	0.8	52.8325	1198.8	478.15	124.771	1198.71	520.456	-20.382	1200.77	520.062	220.103	1037.01	648.989	-127.816	1039.02	675.29	31.3043	986.46	569.788	278.276	652.626	663.817	281.383	744.25	389.546	208.244	752.915	408.537	224.683	768.163	306.932	211.758	731.873	205.133	-203.775	652.948	645.324	-184.493	742.098	373.367	-118.445	756.413	398.633	-127.502	766.766	298.124	-99.8782	731.52	194.449
82	0.81	52.8995	1198.7	478.225	124.873	1198.63	520.488	-20.3314	1200.73	520.012	220.148	1036.97	648.937	-127.759	1038.98	675.256	31.3404	986.436	569.792	278.316	652.596	663.787	281.444	744.179	389.572	208.329	752.849	408.65	224.775	768.083	306.968	211.808	731.841	205.155	-203.757	652.937	645.265	-184.438	742.048	373.308	-118.393	756.351	398.638	-127.45	766.747	298.071	-99.8398	731.491	194.403
83	0.82	52.9287	1198.63	478.267	124.907	1198.59	520.473	-20.3021	1200.71	519.991	220.167	1036.95	648.914	-127.73	1038.97	675.241	31.3555	986.415	569.788	278.334	652.623	663.823	281.458	744.151	389.612	208.349	752.816	408.684	224.8	768.049	306.969	211.823	731.823	205.186	-203.776	652.978	645.3	-184.433	742.03	373.31	-118.382	756.313	398.671	-127.448	766.746	298.065	-99.835	731.478	194.391
84	0.83	52.9047	1198.63	478.199	124.883	1198.58	520.429	-20.3054	1200.7	520	220.15	1036.96	648.892	-127.738	1039.01	675.244	31.3342	986.417	569.75	278.3	652.634	663.823	281.431	744.161	389.627	208.339	752.828	408.674	224.752	768.071	306.972	211.792	731.839	205.186	-203.818	653.07	645.42	-184.453	742.038	373.331	-118.398	756.323	398.671	-127.481	766.763	298.082	-99.8465	731.491	194.405
85	0.84	52.8462	1198.66	478.074	124.838	1198.6	520.341	-20.3367	1200.72	519.98	220.138	1036.97	648.865	-127.777	1039.04	675.225	31.3071	986.427	569.746	278.251	652.626	663.767	281.363	744.204	389.549	208.301	752.854	408.631	224.682	768.133	306.948	211.74	731.87	205.134	-203.862	653.14	645.507	-184.486	742.066	373.344	-118.437	756.373	398.668	-127.519	766.788	298.122	-99.8751	731.51	194.435
86	0.85	52.8248	1198.73	477.957	124.82	1198.63	520.24	-20.3485	1200.73	519.922	220.144	1036.98	648.826	-127.806	1039.08	675.188	31.3065	986.45	569.747	278.229	652.627	663.74	281.316	744.263	389.502	208.252	752.899	408.567	224.634	768.195	306.893	211.708	731.901	205.097	-203.895	653.184	645.554	-184.518	742.106	373.312	-118.474	756.44	398.647	-127.53	766.786	298.116	-99.8955	731.537	194.427
87	0.86	52.8482	1198.79	477.824	124.835	1198.66	520.195	-20.3175	1200.75	519.858	220.156	1037	648.797	-127.791	1039.1	675.17	31.3312	986.492	569.697	278.239	652.64	663.756	281.298	744.315	389.451	208.236	752.962	408.506	224.63	768.232	306.855	211.714	731.908	205.065	-203.9	653.199	645.558	-184.518	742.136	373.284	-118.483	756.477	398.604	-127.493	766.775	298.089	-99.8885	731.552	194.402
88	0.87	52.8946	1198.8	477.757	124.867	1198.67	520.152	-20.2708	1200.76	519.773	220.185	1037.01	648.789	-127.762	1039.12	675.157	31.3657	986.543	569.617	278.266	652.652	663.793	281.305	744.332	389.436	208.25	752.987	408.485	224.647	768.254	306.835	211.738	731.912	205.07	-203.875	653.181	645.534	-184.481	742.154	373.253	-118.456	756.502	398.529	-127.435	766.779	298.084	-99.865	731.554	194.397
89	0.88	52.923	1198.78	477.78	124.875	1198.66	520.121	-20.247	1200.74	519.767	220.213	1037.01	648.782	-127.744	1039.12	675.134	31.3938	986.554	569.601	278.301	652.625	663.783	281.346	744.322	389.48	208.251	752.984	408.47	224.643	768.235	306.86	211.76	731.915	205.071	-203.849	653.125	645.46	-184.468	742.157	373.232	-118.445	756.5	398.548	-127.425	766.792	298.077	-99.8577	731.556	194.398
90	0.89	52.9319	1198.72	477.862	124.907	1198.63	520.177	-20.2518	1200.73	519.792	220.226	1037	648.782	-127.73	1039.12	675.143	31.3996	986.537	569.632	278.335	652.592	663.776	281.38	744.297	389.517	208.265	752.956	408.535	224.663	768.209	306.924	211.767	731.906	205.115	-203.834	653.075	645.388	-184.481	742.146	373.275	-118.448	756.479	398.633	-127.463	766.804	298.089	-99.8651	731.556	194.413
91	0.9	52.9425	1198.63	477.945	124.938	1198.58	520.243	-20.2339	1200.71	519.808	220.224	1036.96	648.767	-127.718	1039.1	675.146	31.382	986.5	569.668	278.348	652.596	663.797	281.403	744.243	389.567	208.302	752.908	408.631	224.67	768.158	306.941	211.768	731.897	205.14	-203.819	653.056	645.366	-184.486	742.101	373.314	-118.441	756.428	398.675	-127.5	766.786	298.111	-99.8814	731.534	194.407
92	0.91	52.9737	1198.55	477.985	124.954	1198.52	520.256	-20.2073	1200.67	519.856	220.233	1036.93	648.743	-127.709	1039.09	675.132	31.3786	986.445	569.679	278.334	652.593	663.794	281.403	744.188	389.541	208.304	752.836	408.637	224.678	768.09	306.941	211.769	731.865	205.14	-203.811	653.071	645.374	-184.463	742.049	373.305	-118.435	756.374	398.67	-127.495	766.755	298.074	-99.8698	731.488	194.411
93	0.92	53.0214	1198.46	478.07	124.985	1198.46	520.236	-20.1909	1200.61	519.859	220.261	1036.92	648.741	-127.683	1039.06	675.111	31.3782	986.402	569.741	278.338	652.589	663.792	281.405	744.146	389.527	208.297	752.791	408.601	224.709	768.047	306.902	211.774	731.812	205.138	-203.839	653.122	645.427	-184.447	742.018	373.284	-118.432	756.319	398.679	-127.489	766.722	298.064	-99.8546	731.463	194.385
94	0.93	53.0263	1198.44	478.133	125	1198.46	520.238	-20.1756	1200.62	519.878	220.266	1036.92	648.725	-127.678	1039.06	675.095	31.3852	986.399	569.752	278.331	652.597	663.779	281.392	744.141	389.531	208.31	752.774	408.627	224.712	768.03	306.934	211.768	731.816	205.149	-203.869	653.207	645.523	-184.457	742.024	373.314	-118.453	756.31	398.716	-127.508	766.74	298.047	-99.8576	731.469	194.393
95	0.94	52.9881	1198.52	478.045	124.995	1198.49	520.214	-20.1958	1200.66	519.864	220.254	1036.94	648.732	-127.703	1039.1	675.092	31.3839	986.456	569.668	278.307	652.63	663.786	281.36	744.195	389.498	208.278	752.819	408.602	224.685	768.07	306.97	211.742	731.863	205.153	-203.895	653.255	645.58	-184.484	742.049	373.319	-118.472	756.366	398.696	-127.533	766.76	298.09	-99.8825	731.497	194.414
96	0.95	52.9622	1198.61	477.861	124.976	1198.56	520.14	-20.1974	1200.7	519.795	220.26	1036.96	648.736	-127.707	1039.15	675.1	31.3922	986.536	569.57	278.288	652.607	663.756	281.339	744.269	389.464	208.247	752.893	408.555	224.653	768.14	306.951	211.721	731.898	205.116	-203.913	653.278	645.618	-184.487	742.101	373.295	-118.487	756.454	398.635	-127.521	766.782	298.051	-99.8908	731.532	194.418
97	0.96	52.9911	1198.69	477.76	124.981	1198.62	520.073	-20.1642	1200.72	519.722	220.283	1036.97	648.723	-127.674	1039.18	675.095	31.4286	986.62	569.459	278.309	652.591	663.744	281.341	744.332	389.446	208.262	752.963	408.547	224.638	768.219	306.908	211.726	731.921	205.079	-203.913	653.261	645.584	-184.489	742.155	373.304	-118.48	756.53	398.578	-127.487	766.788	298.053	-99.885	731.556	194.436
98	0.97	53.0293	1198.76	477.664	124.989	1198.67	519.991	-20.1282	1200.76	519.619	220.322	1036.98	648.694	-127.636	1039.19	675.072	31.474	986.678	569.377	278.336	652.557	663.744	281.355	744.36	389.454	208.274	753.008	408.517	224.66	768.271	306.882	211.747	731.936	205.069	-203.889	653.2	645.491	-184.493	742.188	373.282	-118.464	756.578	398.525	-127.429	766.787	298.067	-99.8751	731.583	194.392
99	0.98	53.0548	1198.77	477.648	125.008	1198.66	519.973	-20.0973	1200.75	519.592	220.349	1036.97	648.691	-127.622	1039.19	675.058	31.5047	986.665	569.402	278.36	652.52	663.738	281.366	744.348	389.451	208.283	753.021	408.498	224.667	768.283	306.85	211.775	731.916	205.094	-203.852	653.157	645.455	-184.477	742.176	373.274	-118.454	756.563	398.512	-127.409	766.788	298.046	-99.8656	731.582	194.355
100	0.99	53.073	1198.66	477.771	125.051	1198.59	520.086	-20.081	1200.71	519.66	220.372	1036.95	648.706	-127.613	1039.17	675.07	31.5133	986.605	569.475	278.381	652.521	663.755	281.404	744.285	389.52	208.297	752.963	408.552	224.698	768.227	306.884	211.79	731.892	205.131	-203.822	653.127	645.406	-184.456	742.126	373.303	-118.441	756.483	398.589	-127.427	766.77	298.072	-99.8461	731.553	194.373
101	1	53.0784	1198.53	477.991	125.068	1198.51	520.163	-20.0926	1200.67	519.739	220.376	1036.9	648.694	-127.6	1039.13	675.07	31.4828	986.514	569.547	278.378	652.507	663.731	281.437	744.185	389.586	208.331	752.84	408.687	224.728	768.115	306.947	211.787	731.854	205.164	-203.811	653.107	645.344	-184.459	742.068	373.33	-118.439	756.388	398.661	-127.478	766.743	298.101	-99.8676	731.498	194.398
102	1.01	53.0922	1198.42	478.136	125.084	1198.45	520.192	-20.0922	1200.62	519.81	220.37	1036.85	648.682	-127.592	1039.09	675.062	31.46	986.429	569.639	278.352	652.465	663.694	281.45	744.123	389.587	208.348	752.748	408.704	224.739	768.039	306.98	211.791	731.808	205.192	-203.828	653.126	645.373	-184.467	742.017	373.357	-118.441	756.303	398.711	-127.517	766.723	298.11	-99.8923	731.457	194.402
103	1.02	53.1197	1198.36	478.207	125.102	1198.42	520.205	-20.0833	1200.59	519.821	220.375	1036.84	648.682	-127.584	1039.08	675.071	31.4801	986.407	569.649	278.33	652.459	663.721	281.446	744.096	389.595	208.359	752.727	408.705	224.763	767.988	307.034	211.811	731.8	205.206	-203.852	653.195	645.47	-184.456	741.999	373.364	-118.43	756.274	398.734	-127.528	766.713	298.101	-99.8766	731.436	194.414
104	1.03	53.1272	1198.39	478.087	125.107	1198.42	520.194	-20.071	1200.61	519.768	220.369	1036.86	648.679	-127.573	1039.12	675.045	31.4963	986.421	569.614	278.312	652.51	663.775	281.443	744.124	389.593	208.385	752.748	408.747	224.762	767.991	307.033	211.814	731.821	205.211	-203.884	653.279	645.58	-184.455	742.018	373.353	-118.417	756.309	398.706	-127.511	766.73	298.073	-99.8688	731.46	194.411
105	1.04	53.1074	1198.48	477.877	125.106	1198.46	520.103	-20.0717	1200.64	519.669	220.366	1036.89	648.667	-127.592	1039.19	674.992	31.5023	986.502	569.495	278.299	652.548	663.766	281.41	744.197	389.522	208.358	752.838	408.671	224.708	768.078	306.959	211.782	731.885	205.148	-203.911	653.344	645.631	-184.458	742.08	373.317	-118.436	756.407	398.642	-127.494	766.779	298.033	-99.8711	731.511	194.414
106	1.05	53.0924	1198.6	477.619	125.087	1198.53	519.993	-20.0718	1200.69	519.551	220.364	1036.91	648.648	-127.61	1039.25	674.975	31.5052	986.595	569.363	278.293	652.515	663.732	281.347	744.293	389.423	208.299	752.949	408.555	224.644	768.209	306.867	211.746	731.937	205.066	-203.923	653.357	645.633	-184.482	742.146	373.283	-118.466	756.522	398.562	-127.49	766.829	298.004	-99.8806	731.559	194.41
107	1.06	53.0687	1198.67	477.46	125.047	1198.59	519.905	-20.0643	1200.72	519.504	220.358	1036.92	648.665	-127.616	1039.28	675.009	31.4877	986.634	569.336	278.296	652.489	663.746	281.317	744.355	389.408	208.254	753.024	408.52	224.616	768.285	306.821	211.74	731.955	205.049	-203.914	653.311	645.587	-184.51	742.19	373.27	-118.496	756.591	398.521	-127.488	766.826	298.038	-99.8854	731.576	194.401
108	1.07	53.0584	1198.66	477.46	125.018	1198.59	519.835	-20.0793	1200.7	519.482	220.351	1036.91	648.673	-127.608	1039.26	675.017	31.4715	986.636	569.317	278.324	652.469	663.742	281.326	744.354	389.438	208.251	753.038	408.496	224.615	768.304	306.82	211.743	731.939	205.053	-203.883	653.241	645.504	-184.529	742.176	373.255	-118.533	756.586	398.544	-127.495	766.801	298.063	-99.8993	731.569	194.37
109	1.08	53.0888	1198.55	477.546	125.037	1198.52	519.854	-20.0763	1200.64	519.422	220.351	1036.88	648.646	-127.606	1039.21	674.99	31.4755	986.572	569.364	278.344	652.445	663.729	281.363	744.285	389.464	208.271	752.993	408.512	224.642	768.262	306.832	211.748	731.901	205.071	-203.858	653.19	645.444	-184.518	742.118	373.258	-118.541	756.53	398.585	-127.503	766.762	298.053	-99.8996	731.53	194.372
110	1.09	53.1263	1198.41	477.679	125.086	1198.41	519.944	-20.0617	1200.58	519.481	220.351	1036.83	648.627	-127.594	1039.18	674.973	31.475	986.477	569.466	278.36	652.473	663.785	281.399	744.202	389.494	208.284	752.907	408.561	224.711	768.173	306.898	211.764	731.862	205.101	-203.855	653.182	645.416	-184.497	742.054	373.284	-118.522	756.438	398.626	-127.513	766.725	298.053	-99.8895	731.492	194.368
111	1.1	53.1392	1198.29	477.803	125.112	1198.35	519.991	-20.0685	1200.53	519.556	220.339	1036.81	648.631	-127.6	1039.15	674.973	31.4569	986.419	569.545	278.356	652.481	663.803	281.43	744.146	389.554	208.318	752.826	408.618	224.754	768.098	306.978	211.766	731.848	205.133	-203.867	653.177	645.416	-184.496	742.021	373.322	-118.505	756.37	398.688	-127.53	766.701	298.099	-99.8835	731.47	194.388
112	1.11	53.1666	1198.24	477.857	125.117	1198.33	520.009	-20.0681	1200.52	519.566	220.324	1036.81	648.641	-127.601	1039.14	674.992	31.4589	986.383	569.597	278.325	652.445	663.762	281.454	744.122	389.609	208.351	752.797	408.659	224.768	768.052	307.037	211.774	731.844	205.172	-203.892	653.203	645.479	-184.491	742.012	373.341	-118.475	756.349	398.715	-127.531	766.706	298.135	-99.8714	731.461	194.43
113	1.12	53.1943	1198.24	477.84	125.132	1198.33	519.995	-20.0427	1200.53	519.552	220.324	1036.81	648.646	-127.584	1039.13	674.999	31.4917	986.385	569.572	278.292	652.438	663.765	281.473	744.123	389.623	208.401	752.799	408.725	224.797	768.029	307.036	211.802	731.846	205.188	-203.93	653.221	645.536	-184.462	742.013	373.351	-118.453	756.354	398.697	-127.517	766.741	298.117	-99.8614	731.468	194.451
114	1.13	53.1934	1198.25	477.72	125.138	1198.34	519.967	-20.017	1200.52	519.47	220.327	1036.81	648.63	-127.581	1039.11	674.954	31.5149	986.413	569.483	278.265	652.438	663.737	281.483	744.142	389.61	208.422	752.831	408.725	224.811	768.04	307.04	211.826	731.863	205.193	-203.957	653.234	645.582	-184.444	742.021	373.341	-118.428	756.383	398.659	-127.495	766.777	298.075	-99.8531	731.484	194.424
115	1.14	53.1722	1198.31	477.583	125.118	1198.37	519.927	-20.0432	1200.53	519.376	220.312	1036.83	648.637	-127.579	1039.11	674.928	31.4967	986.433	569.425	278.271	652.472	663.757	281.461	744.184	389.586	208.397	752.872	408.713	224.79	768.088	307	211.811	731.898	205.187	-203.95	653.23	645.586	-184.454	742.059	373.317	-118.438	756.439	398.638	-127.486	766.8	298.072	-99.8444	731.533	194.405
116	1.15	53.1033	1198.37	477.408	125.053	1198.4	519.837	-20.101	1200.53	519.258	220.297	1036.84	648.632	-127.6	1039.09	674.904	31.4783	986.436	569.384	278.279	652.472	663.763	281.41	744.244	389.53	208.344	752.938	408.617	224.74	768.17	306.924	211.786	731.915	205.137	-203.918	653.175	645.526	-184.474	742.096	373.306	-118.483	756.499	398.627	-127.487	766.798	298.083	-99.8531	731.548	194.406
117	1.16	53	1198.38	477.238	124.96	1198.42	519.713	-20.1752	1200.5	519.189	220.265	1036.84	648.594	-127.642	1039.06	674.872	31.449	986.413	569.377	278.293	652.446	663.751	281.365	744.279	389.483	208.282	752.997	408.522	224.666	768.244	306.857	211.756	731.899	205.09	-203.889	653.099	645.47	-184.521	742.098	373.294	-118.529	756.519	398.601	-127.505	766.765	298.094	-99.886	731.55	194.403
118	1.17	52.9087	1198.38	477.121	124.87	1198.42	519.616	-20.2465	1200.46	519.206	220.237	1036.84	648.58	-127.665	1039.04	674.848	31.4167	986.354	569.428	278.317	652.423	663.754	281.358	744.274	389.503	208.272	752.996	408.529	224.644	768.254	306.848	211.731	731.881	205.101	-203.863	653.015	645.405	-184.568	742.09	373.327	-118.574	756.506	398.608	-127.556	766.744	298.109	-99.9117	731.541	194.403
119	1.18	52.8528	1198.33	477.107	124.815	1198.39	519.591	-20.2854	1200.41	519.208	220.226	1036.82	648.557	-127.674	1039	674.85	31.3931	986.291	569.427	278.342	652.42	663.764	281.366	744.236	389.538	208.274	752.962	408.566	224.639	768.232	306.843	211.732	731.865	205.127	-203.825	652.972	645.357	-184.567	742.067	373.33	-118.582	756.475	398.634	-127.578	766.733	298.106	-99.9188	731.517	194.399
120	1.19	52.8135	1198.25	477.092	124.802	1198.34	519.573	-20.3286	1200.37	519.145	220.228	1036.8	648.51	-127.667	1038.96	674.831	31.4051	986.265	569.337	278.335	652.439	663.762	281.384	744.184	389.517	208.3	752.912	408.586	224.668	768.175	306.871	211.744	731.855	205.13	-203.786	652.922	645.293	-184.536	742.035	373.293	-118.546	756.425	398.641	-127.578	766.723	298.079	-99.9112	731.497	194.397
121	1.2	52.7827	1198.19	477.082	124.805	1198.3	519.585	-20.3652	1200.32	519.128	220.248	1036.8	648.484	-127.647	1038.94	674.795	31.4316	986.223	569.353	278.343	652.464	663.764	281.431	744.147	389.535	208.358	752.853	408.629	224.711	768.093	306.942	211.771	731.857	205.167	-203.765	652.932	645.331	-184.517	741.996	373.314	-118.509	756.383	398.678	-127.574	766.746	298.059	-99.8956	731.482	194.386
122	1.21	52.7857	1198.12	477.176	124.806	1198.29	519.6	-20.3754	1200.28	519.16	220.247	1036.79	648.461	-127.63	1038.94	674.804	31.4706	986.183	569.458	278.354	652.486	663.764	281.482	744.133	389.62	208.415	752.799	408.708	224.77	768.036	307.038	211.808	731.851	205.21	-203.748	652.959	645.394	-184.487	741.98	373.358	-118.485	756.376	398.717	-127.561	766.782	298.042	-99.875	731.466	194.411
123	1.22	52.7415	1198.08	477.171	124.763	1198.29	519.517	-20.4036	1200.27	519.131	220.235	1036.77	648.452	-127.646	1038.93	674.805	31.4763	986.157	569.49	278.352	652.481	663.772	281.483	744.137	389.62	208.464	752.772	408.772	224.788	768.014	307.063	211.81	731.86	205.193	-203.721	652.959	645.434	-184.467	741.967	373.364	-118.465	756.363	398.713	-127.549	766.777	298.053	-99.8808	731.466	194.443
124	1.23	52.6735	1198.08	477.03	124.692	1198.27	519.404	-20.4489	1200.28	519.024	220.205	1036.76	648.396	-127.69	1038.95	674.784	31.4348	986.151	569.417	278.353	652.454	663.75	281.453	744.141	389.594	208.45	752.802	408.743	224.784	768.033	307.061	211.784	731.868	205.168	-203.7	652.945	645.441	-184.475	741.956	373.362	-118.467	756.374	398.701	-127.549	766.761	298.045	-99.8887	731.482	194.441
125	1.24	52.5919	1198.1	476.883	124.596	1198.27	519.25	-20.4963	1200.3	518.941	220.179	1036.76	648.309	-127.717	1038.97	674.748	31.3946	986.157	569.374	278.363	652.43	663.717	281.41	744.172	389.55	208.397	752.871	408.66	224.746	768.098	306.981	211.751	731.884	205.127	-203.666	652.942	645.444	-184.492	741.971	373.35	-118.487	756.412	398.682	-127.553	766.742	298.07	-99.8904	731.503	194.446
126	1.25	52.4925	1198.17	476.602	124.507	1198.29	519.087	-20.5624	1200.3	518.824	220.149	1036.77	648.245	-127.739	1038.99	674.711	31.3568	986.163	569.348	278.381	652.45	663.738	281.365	744.233	389.489	208.334	752.935	408.601	224.704	768.207	306.886	211.727	731.887	205.09	-203.628	652.92	645.394	-184.51	742.016	373.305	-118.521	756.465	398.637	-127.546	766.741	298.095	-99.8966	731.534	194.411
127	1.26	52.4191	1198.2	476.362	124.442	1198.31	518.964	-20.6087	1200.29	518.728	220.126	1036.77	648.189	-127.769	1038.99	674.701	31.3374	986.179	569.263	278.384	652.471	663.75	281.344	744.281	389.465	208.285	752.995	408.529	224.683	768.277	306.861	211.724	731.894	205.083	-203.599	652.894	645.362	-184.521	742.052	373.279	-118.542	756.516	398.594	-127.535	766.738	298.106	-99.911	731.567	194.373
128	1.27	52.418	1198.16	476.323	124.413	1198.28	518.892	-20.6339	1200.28	518.63	220.117	1036.78	648.187	-127.79	1038.98	674.71	31.3349	986.178	569.232	278.38	652.468	663.773	281.375	744.273	389.51	208.326	752.98	408.587	224.673	768.282	306.866	211.74	731.904	205.097	-203.58	652.841	645.328	-184.531	742.049	373.304	-118.542	756.516	398.601	-127.521	766.741	298.122	-99.907	731.549	194.419
129	1.28	52.4401	1198.11	476.365	124.43	1198.23	518.887	-20.6331	1200.26	518.591	220.113	1036.79	648.169	-127.79	1038.95	674.7	31.3394	986.165	569.247	278.361	652.465	663.782	281.432	744.249	389.564	208.364	752.964	408.642	224.714	768.226	306.9	211.78	731.907	205.142	-203.584	652.795	645.289	-184.516	742.031	373.329	-118.517	756.507	398.643	-127.517	766.771	298.138	-99.8941	731.536	194.453
130	1.29	52.4603	1198.03	476.338	124.467	1198.18	518.905	-20.6289	1200.22	518.506	220.108	1036.78	648.146	-127.769	1038.91	674.68	31.3505	986.133	569.197	278.347	652.473	663.761	281.483	744.231	389.587	208.399	752.948	408.638	224.762	768.151	306.925	211.81	731.912	205.157	-203.596	652.758	645.267	-184.479	742.009	373.321	-118.479	756.473	398.681	-127.516	766.803	298.114	-99.8855	731.524	194.456
131	1.3	52.4685	1197.92	476.366	124.47	1198.11	518.916	-20.6397	1200.18	518.421	220.088	1036.78	648.124	-127.775	1038.85	674.657	31.3446	986.056	569.253	278.336	652.467	663.737	281.498	744.199	389.592	208.436	752.897	408.674	224.797	768.089	306.945	211.831	731.896	205.173	-203.615	652.746	645.271	-184.459	741.976	373.334	-118.471	756.421	398.683	-127.52	766.809	298.059	-99.8793	731.512	194.421
132	1.31	52.4462	1197.82	476.442	124.435	1198.05	518.931	-20.6892	1200.11	518.421	220.043	1036.77	648.14	-127.807	1038.81	674.652	31.2871	985.962	569.351	278.316	652.475	663.738	281.476	744.162	389.618	208.431	752.861	408.741	224.819	768.049	307.011	211.81	731.865	205.193	-203.645	652.768	645.317	-184.487	741.954	373.362	-118.507	756.378	398.731	-127.552	766.799	298.078	-99.8819	731.497	194.403
133	1.32	52.3552	1197.73	476.49	124.363	1198.01	518.905	-20.7719	1200.04	518.412	219.993	1036.75	648.141	-127.857	1038.77	674.641	31.2195	985.891	569.369	278.321	652.487	663.734	281.42	744.143	389.592	208.369	752.832	408.715	224.761	768.076	306.992	211.764	731.853	205.199	-203.67	652.787	645.364	-184.547	741.946	373.375	-118.557	756.353	398.747	-127.625	766.776	298.106	-99.9081	731.483	194.421
134	1.33	52.2508	1197.72	476.403	124.279	1197.99	518.846	-20.8468	1199.99	518.346	219.943	1036.73	648.126	-127.907	1038.75	674.627	31.1642	985.844	569.364	278.319	652.464	663.719	281.358	744.147	389.536	208.292	752.833	408.628	224.69	768.106	306.965	211.706	731.847	205.151	-203.694	652.774	645.397	-184.594	741.932	373.363	-118.611	756.37	398.731	-127.681	766.75	298.1	-99.9436	731.477	194.412
135	1.34	52.1811	1197.74	476.326	124.216	1198.01	518.782	-20.907	1199.97	518.28	219.897	1036.73	648.109	-127.958	1038.74	674.606	31.1345	985.807	569.362	278.308	652.456	663.728	281.34	744.183	389.536	208.244	752.866	408.588	224.641	768.149	306.93	211.678	731.858	205.125	-203.697	652.739	645.387	-184.617	741.94	373.35	-118.645	756.408	398.706	-127.704	766.75	298.102	-99.9544	731.485	194.446
136	1.35	52.1563	1197.77	476.237	124.177	1198.03	518.716	-20.9382	1199.95	518.221	219.883	1036.76	648.111	-127.972	1038.73	674.569	31.1193	985.831	569.311	278.347	652.479	663.773	281.337	744.219	389.505	208.249	752.909	408.582	224.633	768.189	306.914	211.686	731.871	205.115	-203.68	652.691	645.339	-184.608	741.972	373.34	-118.627	756.446	398.664	-127.688	766.775	298.062	-99.9459	731.511	194.441
137	1.36	52.1312	1197.82	476.106	124.161	1198.06	518.656	-20.956	1199.94	518.156	219.892	1036.77	648.076	-127.964	1038.73	674.54	31.1424	985.882	569.218	278.38	652.485	663.776	281.369	744.249	389.5	208.273	752.954	408.558	224.648	768.196	306.884	211.722	731.885	205.104	-203.634	652.657	645.294	-184.578	742.011	373.284	-118.595	756.486	398.612	-127.633	766.797	298.037	-99.931	731.538	194.403
138	1.37	52.1141	1197.87	476.043	124.149	1198.1	518.597	-20.973	1199.97	518.124	219.896	1036.79	648.074	-127.952	1038.73	674.539	31.1731	985.925	569.152	278.385	652.479	663.755	281.412	744.273	389.52	208.302	752.997	408.542	224.666	768.199	306.876	211.748	731.902	205.113	-203.609	652.624	645.28	-184.546	742.037	373.256	-118.538	756.514	398.592	-127.583	766.826	298.034	-99.9045	731.559	194.387
139	1.38	52.0775	1197.85	476.103	124.119	1198.11	518.589	-21.0137	1199.97	518.134	219.873	1036.8	648.097	-127.973	1038.74	674.58	31.1705	985.91	569.164	278.379	652.505	663.784	281.426	744.286	389.557	208.313	753.008	408.542	224.668	768.21	306.908	211.76	731.909	205.141	-203.579	652.599	645.283	-184.542	742.03	373.293	-118.525	756.517	398.628	-127.573	766.848	298.067	-99.9023	731.562	194.446
140	1.39	52.0136	1197.81	476.164	124.081	1198.08	518.63	-21.0934	1199.95	518.167	219.843	1036.8	648.125	-128	1038.71	674.614	31.1465	985.871	569.23	278.358	652.516	663.788	281.419	744.282	389.564	208.326	752.99	408.583	224.687	768.23	306.913	211.757	731.907	205.169	-203.558	652.559	645.302	-184.533	742.008	373.338	-118.546	756.501	398.657	-127.581	766.827	298.097	-99.9023	731.552	194.475
141	1.4	51.9444	1197.76	476.236	124.041	1198.04	518.651	-21.1604	1199.88	518.235	219.817	1036.79	648.154	-128.008	1038.67	674.643	31.1098	985.793	569.304	278.347	652.538	663.795	281.42	744.245	389.594	208.331	752.944	408.65	224.742	768.211	306.935	211.76	731.888	205.197	-203.55	652.54	645.351	-184.526	741.964	373.374	-118.554	756.464	398.722	-127.58	766.793	298.126	-99.9147	731.527	194.473
142	1.41	51.8842	1197.65	476.37	124	1197.98	518.68	-21.2225	1199.82	518.327	219.784	1036.77	648.161	-128.019	1038.62	674.65	31.0761	985.678	569.456	278.343	652.573	663.801	281.416	744.181	389.619	208.324	752.883	408.677	224.767	768.149	306.958	211.754	731.857	205.214	-203.532	652.54	645.378	-184.526	741.911	373.394	-118.554	756.385	398.777	-127.607	766.743	298.149	-99.9232	731.5	194.48
143	1.42	51.8264	1197.58	476.526	123.953	1197.95	518.691	-21.3046	1199.78	518.36	219.756	1036.77	648.167	-128.055	1038.58	674.64	31.0453	985.6	569.55	278.341	652.586	663.8	281.393	744.147	389.593	208.324	752.829	408.7	224.765	768.108	306.986	211.742	731.837	205.212	-203.512	652.55	645.397	-184.543	741.885	373.39	-118.555	756.341	398.783	-127.651	766.725	298.172	-99.9249	731.487	194.486
144	1.43	51.7566	1197.59	476.567	123.917	1197.96	518.702	-21.3633	1199.79	518.385	219.744	1036.77	648.157	-128.074	1038.57	674.664	31.0352	985.611	569.546	278.328	652.599	663.808	281.393	744.155	389.606	208.331	752.833	408.729	224.748	768.088	306.994	211.74	731.844	205.223	-203.5	652.54	645.392	-184.543	741.903	373.397	-118.546	756.346	398.781	-127.643	766.751	298.189	-99.9167	731.5	194.489
145	1.44	51.7073	1197.65	476.495	123.877	1198.01	518.673	-21.3919	1199.81	518.359	219.739	1036.8	648.145	-128.09	1038.57	674.663	31.0292	985.665	569.461	278.316	652.571	663.808	281.4	744.176	389.609	208.332	752.852	408.698	224.738	768.089	307.016	211.753	731.866	205.217	-203.487	652.523	645.423	-184.536	741.93	373.402	-118.545	756.394	398.766	-127.623	766.786	298.132	-99.9153	731.515	194.461
146	1.45	51.6701	1197.73	476.42	123.829	1198.06	518.614	-21.4181	1199.84	518.319	219.733	1036.81	648.133	-128.093	1038.56	674.65	31.0397	985.735	569.375	278.306	652.548	663.804	281.411	744.214	389.593	208.348	752.881	408.681	224.732	768.095	306.991	211.753	731.893	205.198	-203.471	652.468	645.37	-184.548	741.956	373.367	-118.52	756.456	398.686	-127.608	766.833	298.089	-99.9157	731.535	194.448
147	1.46	51.649	1197.8	476.336	123.779	1198.14	518.56	-21.446	1199.86	518.274	219.729	1036.82	648.12	-128.09	1038.57	674.645	31.0389	985.779	569.338	278.287	652.543	663.8	281.419	744.257	389.584	208.334	752.937	408.616	224.705	768.136	306.943	211.756	731.903	205.186	-203.452	652.426	645.33	-184.533	741.985	373.343	-118.529	756.5	398.661	-127.601	766.869	298.031	-99.9127	731.559	194.432
148	1.47	51.6003	1197.86	476.266	123.711	1198.21	518.492	-21.4864	1199.86	518.257	219.712	1036.82	648.108	-128.111	1038.56	674.622	31.0108	985.798	569.241	278.284	652.551	663.806	281.373	744.299	389.537	208.295	752.974	408.559	224.677	768.195	306.888	211.749	731.907	205.141	-203.426	652.404	645.319	-184.523	741.998	373.303	-118.556	756.531	398.601	-127.596	766.848	298.019	-99.9253	731.577	194.414
149	1.48	51.4854	1197.87	476.215	123.597	1198.26	518.429	-21.5749	1199.83	518.28	219.67	1036.81	648.12	-128.146	1038.53	674.613	30.9311	985.771	569.203	278.282	652.564	663.831	281.312	744.331	389.487	208.235	753.002	408.492	224.645	768.237	306.864	211.712	731.888	205.103	-203.422	652.381	645.335	-184.571	742.002	373.292	-118.603	756.527	398.592	-127.633	766.79	298.077	-99.9571	731.584	194.412
150	1.49	51.3715	1197.81	476.339	123.522	1198.27	518.496	-21.6621	1199.79	518.36	219.629	1036.8	648.16	-128.184	1038.5	674.63	30.8705	985.667	569.396	278.273	652.594	663.862	281.269	744.329	389.472	208.186	752.985	408.516	224.618	768.246	306.898	211.679	731.865	205.127	-203.422	652.348	645.342	-184.631	741.975	373.352	-118.669	756.492	398.665	-127.688	766.742	298.152	-99.9854	731.551	194.472
151	1.5	51.3029	1197.74	476.488	123.474	1198.23	518.566	-21.7295	1199.75	518.457	219.603	1036.78	648.168	-128.204	1038.46	674.652	30.8565	985.562	569.531	278.256	652.597	663.869	281.277	744.277	389.524	208.182	752.923	408.57	224.616	768.227	306.912	211.659	731.841	205.15	-203.414	652.323	645.324	-184.649	741.912	373.412	-118.7	756.44	398.737	-127.734	766.722	298.195	-100.011	731.514	194.51
152	1.51	51.3008	1197.7	476.557	123.496	1198.17	518.623	-21.7531	1199.72	518.47	219.598	1036.76	648.171	-128.191	1038.42	674.665	30.8851	985.498	569.581	278.247	652.597	663.864	281.316	744.208	389.567	208.228	752.88	408.613	224.648	768.159	306.92	211.674	731.84	205.15	-203.397	652.333	645.35	-184.611	741.875	373.416	-118.658	756.377	398.748	-127.725	766.728	298.194	-99.9891	731.492	194.504
153	1.52	51.3555	1197.63	476.637	123.569	1198.12	518.718	-21.7349	1199.71	518.427	219.602	1036.77	648.179	-128.156	1038.39	674.66	30.9403	985.476	569.57	278.233	652.609	663.874	281.374	744.162	389.614	208.31	752.84	408.702	224.72	768.073	306.974	211.73	731.83	205.192	-203.387	652.348	645.404	-184.56	741.866	373.423	-118.577	756.332	398.752	-127.686	766.767	298.133	-99.9368	731.499	194.482
154	1.53	51.4059	1197.59	476.712	123.604	1198.11	518.774	-21.704	1199.72	518.394	219.616	1036.79	648.201	-128.119	1038.36	674.661	30.9843	985.491	569.553	278.229	652.613	663.866	281.436	744.152	389.695	208.395	752.783	408.813	224.785	768.016	307.056	211.771	731.834	205.229	-203.372	652.348	645.412	-184.505	741.877	373.425	-118.505	756.321	398.769	-127.644	766.822	298.105	-99.9105	731.5	194.446
155	1.54	51.415	1197.61	476.719	123.588	1198.14	518.727	-21.6922	1199.76	518.346	219.619	1036.81	648.209	-128.116	1038.38	674.683	31.0008	985.551	569.513	278.229	652.586	663.857	281.456	744.172	389.706	208.424	752.786	408.804	224.796	768.021	307.068	211.79	731.851	205.253	-203.352	652.32	645.38	-184.491	741.913	373.397	-118.476	756.357	398.735	-127.618	766.875	298.1	-99.8891	731.521	194.426
156	1.55	51.366	1197.66	476.635	123.551	1198.16	518.65	-21.7081	1199.78	518.327	219.616	1036.82	648.199	-128.133	1038.4	674.669	31.0071	985.599	569.471	278.242	652.567	663.852	281.454	744.214	389.655	208.395	752.836	408.712	224.762	768.062	307.028	211.78	731.877	205.23	-203.329	652.286	645.345	-184.499	741.936	373.383	-118.477	756.418	398.695	-127.593	766.874	298.099	-99.8807	731.545	194.423
157	1.56	51.2923	1197.75	476.471	123.464	1198.24	518.534	-21.7385	1199.78	518.331	219.6	1036.82	648.211	-128.161	1038.43	674.659	30.9585	985.644	569.419	278.239	652.581	663.882	281.411	744.287	389.619	208.337	752.91	408.647	224.725	768.167	306.95	211.756	731.897	205.183	-203.332	652.289	645.367	-184.522	741.948	373.396	-118.514	756.476	398.66	-127.586	766.832	298.125	-99.8942	731.564	194.456
158	1.57	51.2014	1197.82	476.269	123.354	1198.32	518.401	-21.7933	1199.76	518.329	219.566	1036.81	648.212	-128.199	1038.44	674.645	30.8915	985.668	569.385	278.231	652.611	663.914	281.322	744.356	389.566	208.278	752.979	408.597	224.675	768.288	306.886	211.722	731.885	205.157	-203.337	652.281	645.372	-184.578	741.978	373.37	-118.588	756.5	398.669	-127.601	766.785	298.165	-99.9325	731.582	194.449
159	1.58	51.1349	1197.85	476.168	123.269	1198.34	518.286	-21.843	1199.75	518.325	219.529	1036.81	648.212	-128.231	1038.45	674.628	30.8287	985.643	569.341	278.229	652.626	663.932	281.256	744.396	389.496	208.223	752.993	408.541	224.627	768.342	306.84	211.682	731.867	205.111	-203.335	652.267	645.349	-184.633	741.988	373.32	-118.658	756.52	398.646	-127.617	766.748	298.154	-99.9628	731.591	194.4
160	1.59	51.1128	1197.82	476.226	123.255	1198.33	518.319	-21.8787	1199.73	518.332	219.51	1036.81	648.229	-128.246	1038.43	674.623	30.7931	985.611	569.383	278.223	652.598	663.893	281.242	744.377	389.507	208.171	752.988	408.482	224.605	768.328	306.836	211.662	731.863	205.099	-203.349	652.272	645.356	-184.645	741.966	373.358	-118.691	756.509	398.677	-127.652	766.743	298.174	-99.9881	731.586	194.397
161	1.6	51.1409	1197.74	476.408	123.313	1198.26	518.442	-21.8838	1199.71	518.398	219.508	1036.8	648.248	-128.237	1038.4	674.639	30.8249	985.536	569.582	278.206	652.577	663.875	281.282	744.317	389.577	208.198	752.956	408.534	224.63	768.244	306.905	211.675	731.87	205.15	-203.371	652.264	645.366	-184.625	741.937	373.413	-118.667	756.455	398.742	-127.685	766.766	298.204	-99.9933	731.565	194.45
162	1.61	51.2299	1197.6	476.586	123.419	1198.14	518.579	-21.8367	1199.68	518.359	219.519	1036.78	648.238	-128.192	1038.36	674.666	30.88	985.476	569.612	278.176	652.575	663.88	281.361	744.231	389.633	208.294	752.844	408.672	224.702	768.112	306.986	211.719	731.848	205.224	-203.379	652.264	645.362	-184.587	741.89	373.444	-118.602	756.369	398.79	-127.694	766.799	298.201	-99.9603	731.519	194.488
163	1.62	51.3163	1197.51	476.648	123.533	1198.05	518.653	-21.7776	1199.66	518.305	219.54	1036.77	648.22	-128.142	1038.32	674.664	30.9525	985.4	569.621	278.146	652.571	663.87	281.422	744.175	389.68	208.394	752.737	408.795	224.803	767.989	307.1	211.784	731.803	205.248	-203.4	652.283	645.362	-184.533	741.862	373.449	-118.537	756.301	398.782	-127.682	766.828	298.131	-99.9059	731.463	194.479
164	1.63	51.3688	1197.47	476.694	123.581	1198.02	518.661	-21.7564	1199.63	518.313	219.553	1036.76	648.224	-128.124	1038.29	674.643	30.9873	985.356	569.64	278.141	652.575	663.879	281.456	744.152	389.721	208.429	752.692	408.833	224.826	767.961	307.104	211.81	731.775	205.3	-203.402	652.309	645.391	-184.509	741.858	373.423	-118.52	756.287	398.759	-127.665	766.831	298.097	-99.8734	731.44	194.475
165	1.64	51.363	1197.45	476.676	123.558	1198.02	518.622	-21.755	1199.64	518.285	219.54	1036.74	648.209	-128.134	1038.29	674.627	30.9444	985.378	569.589	278.136	652.555	663.892	281.43	744.141	389.719	208.369	752.72	408.769	224.786	767.993	307.048	211.783	731.78	205.303	-203.399	652.302	645.383	-184.526	741.862	373.405	-118.544	756.296	398.748	-127.67	766.809	298.102	-99.8971	731.461	194.458
166	1.65	51.3121	1197.52	476.489	123.482	1198.08	518.485	-21.7764	1199.65	518.216	219.519	1036.73	648.189	-128.183	1038.32	674.587	30.8782	985.439	569.504	278.145	652.562	663.919	281.351	744.19	389.605	208.273	752.815	408.653	224.721	768.069	306.959	211.721	731.81	205.205	-203.392	652.267	645.357	-184.576	741.873	373.366	-118.609	756.364	398.71	-127.691	766.756	298.096	-99.9435	731.501	194.408
167	1.66	51.2202	1197.67	476.258	123.365	1198.2	518.29	-21.8141	1199.67	518.153	219.495	1036.75	648.17	-128.242	1038.36	674.538	30.8142	985.517	569.386	278.16	652.564	663.929	281.269	744.282	389.516	208.196	752.901	408.585	224.637	768.207	306.887	211.68	731.834	205.129	-203.382	652.227	645.291	-184.648	741.914	373.339	-118.675	756.45	398.663	-127.693	766.729	298.117	-99.9899	731.539	194.416
168	1.67	51.1676	1197.79	476.121	123.288	1198.31	518.157	-21.8331	1199.71	518.137	219.487	1036.78	648.144	-128.257	1038.4	674.537	30.7757	985.615	569.265	278.164	652.527	663.879	281.221	744.393	389.476	208.165	752.969	408.547	224.591	768.319	306.875	211.668	731.857	205.092	-203.377	652.212	645.258	-184.689	741.989	373.327	-118.728	756.524	398.647	-127.704	766.752	298.147	-100.018	731.571	194.413
169	1.68	51.2016	1197.84	476.047	123.314	1198.35	518.135	-21.7881	1199.74	518.106	219.511	1036.8	648.156	-128.249	1038.42	674.538	30.8206	985.67	569.187	278.158	652.55	663.894	281.23	744.42	389.486	208.186	753.021	408.529	224.592	768.338	306.868	211.668	731.881	205.094	-203.386	652.215	645.269	-184.66	742.007	373.309	-118.705	756.576	398.582	-127.678	766.792	298.141	-100.015	731.603	194.398
170	1.69	51.2966	1197.81	476.038	123.449	1198.31	518.249	-21.7207	1199.76	518.026	219.544	1036.8	648.163	-128.204	1038.43	674.551	30.9095	985.667	569.219	278.143	652.579	663.939	281.311	744.358	389.566	208.256	753.011	408.581	224.638	768.275	306.89	211.707	731.897	205.163	-203.399	652.222	645.27	-184.595	741.991	373.321	-118.623	756.544	398.59	-127.632	766.835	298.121	-99.9591	731.602	194.4
171	1.7	51.4324	1197.67	476.235	123.587	1198.18	518.411	-21.656	1199.74	518.017	219.577	1036.82	648.17	-128.139	1038.4	674.559	31.0014	985.599	569.352	278.135	652.581	663.939	281.416	744.271	389.67	208.355	752.941	408.653	224.734	768.177	306.96	211.775	731.888	205.27	-203.386	652.24	645.29	-184.523	741.956	373.36	-118.531	756.468	398.673	-127.6	766.866	298.113	-99.9118	731.581	194.418
172	1.71	51.5188	1197.53	476.427	123.666	1198.08	518.526	-21.6269	1199.67	518.04	219.597	1036.81	648.16	-128.088	1038.35	674.563	31.0576	985.479	569.488	278.133	652.587	663.901	281.466	744.213	389.711	208.425	752.835	408.751	224.832	768.053	307.034	211.823	731.846	205.318	-203.371	652.273	645.335	-184.483	741.914	373.388	-118.479	756.372	398.74	-127.583	766.861	298.12	-99.8845	731.525	194.453
173	1.72	51.512	1197.41	476.535	123.673	1198.01	518.561	-21.6367	1199.61	518.059	219.596	1036.77	648.142	-128.085	1038.29	674.517	31.065	985.341	569.579	278.142	652.58	663.88	281.475	744.161	389.72	208.443	752.741	408.818	224.855	767.992	307.051	211.817	731.789	205.291	-203.372	652.279	645.337	-184.499	741.86	373.402	-118.497	756.286	398.776	-127.611	766.81	298.107	-99.8775	731.468	194.457
174	1.73	51.4555	1197.34	476.623	123.629	1197.97	518.535	-21.6867	1199.57	518.088	219.573	1036.74	648.135	-128.104	1038.25	674.499	31.0275	985.242	569.716	278.155	652.575	663.899	281.434	744.116	389.705	208.422	752.704	408.848	224.832	767.994	307.098	211.778	731.765	205.274	-203.377	652.279	645.34	-184.528	741.814	373.408	-118.544	756.252	398.821	-127.666	766.751	298.128	-99.9074	731.444	194.462
175	1.74	51.3755	1197.36	476.57	123.56	1197.97	518.457	-21.7321	1199.55	518.125	219.554	1036.71	648.124	-128.133	1038.26	674.5	30.9604	985.254	569.715	278.175	652.567	663.921	281.375	744.108	389.692	208.339	752.736	408.789	224.761	768.059	307.038	211.715	731.775	205.237	-203.369	652.29	645.371	-184.572	741.813	373.416	-118.616	756.288	398.835	-127.706	766.709	298.188	-99.9563	731.454	194.466
176	1.75	51.2921	1197.51	476.299	123.491	1198.07	518.299	-21.7512	1199.58	518.107	219.564	1036.7	648.089	-128.16	1038.32	674.446	30.9146	985.353	569.545	278.203	652.569	663.908	281.315	744.181	389.584	208.242	752.828	408.645	224.668	768.158	306.907	211.675	731.799	205.175	-203.339	652.292	645.374	-184.61	741.854	373.369	-118.66	756.365	398.795	-127.722	766.71	298.161	-99.9798	731.499	194.429
177	1.76	51.2574	1197.7	475.964	123.437	1198.2	518.092	-21.7383	1199.65	518.021	219.588	1036.74	648.043	-128.162	1038.37	674.414	30.9134	985.496	569.327	278.203	652.534	663.851	281.276	744.301	389.485	208.205	752.947	408.526	224.628	768.246	306.876	211.676	731.85	205.102	-203.335	652.289	645.369	-184.61	741.931	373.3	-118.668	756.465	398.667	-127.69	766.745	298.133	-99.9925	731.564	194.394
178	1.77	51.2923	1197.83	475.816	123.432	1198.29	518.001	-21.709	1199.72	517.952	219.61	1036.78	648.024	-128.15	1038.43	674.43	30.9348	985.643	569.143	278.182	652.506	663.829	281.275	744.389	389.473	208.227	753.014	408.555	224.596	768.294	306.869	211.684	731.899	205.1	-203.328	652.286	645.368	-184.606	742.011	373.31	-118.647	756.561	398.608	-127.665	766.801	298.132	-99.9988	731.61	194.392
179	1.78	51.3467	1197.84	475.81	123.496	1198.29	518.034	-21.6647	1199.76	517.924	219.631	1036.78	648.024	-128.114	1038.45	674.476	30.9782	985.711	569.079	278.172	652.5	663.85	281.31	744.385	389.505	208.245	753.032	408.575	224.609	768.277	306.918	211.698	731.932	205.13	-203.336	652.298	645.395	-184.592	742.036	373.341	-118.609	756.577	398.63	-127.635	766.858	298.129	-99.9774	731.604	194.419
180	1.79	51.4117	1197.74	475.895	123.59	1198.19	518.127	-21.6211	1199.75	517.897	219.657	1036.77	648.012	-128.074	1038.42	674.476	31.0474	985.668	569.134	278.164	652.479	663.854	281.364	744.296	389.574	208.288	752.976	408.603	224.66	768.19	306.972	211.727	731.916	205.174	-203.34	652.279	645.368	-184.553	741.992	373.361	-118.575	756.522	398.655	-127.626	766.882	298.069	-99.9475	731.575	194.44
181	1.8	51.476	1197.58	476.114	123.672	1198.07	518.254	-21.5966	1199.69	517.898	219.666	1036.73	647.989	-128.043	1038.36	674.492	31.0734	985.523	569.287	278.164	652.467	663.866	281.418	744.188	389.651	208.348	752.867	408.703	224.734	768.087	307.028	211.76	731.86	205.248	-203.347	652.263	645.346	-184.534	741.927	373.406	-118.543	756.412	398.72	-127.639	766.847	298.063	-99.9229	731.534	194.444
182	1.81	51.5091	1197.42	476.314	123.71	1197.96	518.372	-21.5978	1199.6	517.985	219.669	1036.69	647.978	-128.016	1038.29	674.491	31.0604	985.357	569.474	278.163	652.473	663.868	281.421	744.109	389.67	208.371	752.736	408.79	224.787	768.032	307.045	211.777	731.794	205.286	-203.334	652.29	645.368	-184.535	741.863	373.436	-118.538	756.304	398.811	-127.667	766.78	298.118	-99.9365	731.486	194.444
183	1.82	51.5192	1197.34	476.403	123.713	1197.89	518.394	-21.6031	1199.55	518.016	219.667	1036.65	647.984	-128.002	1038.26	674.479	31.0456	985.257	569.619	278.156	652.472	663.862	281.41	744.072	389.655	208.337	752.698	408.778	224.805	768.006	307.052	211.766	731.745	205.25	-203.311	652.314	645.393	-184.557	741.816	373.448	-118.551	756.244	398.843	-127.686	766.718	298.167	-99.9446	731.463	194.472
184	1.83	51.5168	1197.36	476.371	123.698	1197.9	518.341	-21.6091	1199.56	518.017	219.667	1036.65	647.984	-128.003	1038.27	674.482	31.0337	985.263	569.595	278.158	652.459	663.859	281.39	744.086	389.641	208.33	752.71	408.762	224.785	768.042	307.018	211.739	731.759	205.205	-203.311	652.322	645.396	-184.58	741.813	373.43	-118.58	756.265	398.845	-127.694	766.686	298.171	-99.9475	731.468	194.506
185	1.84	51.5091	1197.45	476.267	123.699	1197.96	518.293	-21.5876	1199.61	517.984	219.681	1036.65	647.994	-128.007	1038.33	674.499	31.0355	985.345	569.506	278.149	652.448	663.872	281.359	744.134	389.633	208.32	752.785	408.734	224.735	768.111	306.972	211.72	731.798	205.206	-203.315	652.303	645.388	-184.578	741.858	373.424	-118.6	756.329	398.813	-127.689	766.71	298.162	-99.9381	731.495	194.506
186	1.85	51.5524	1197.6	476.064	123.715	1198.05	518.224	-21.522	1199.68	517.923	219.719	1036.68	648.002	-127.989	1038.39	674.485	31.0909	985.473	569.357	278.145	652.415	663.87	281.358	744.217	389.626	208.326	752.894	408.675	224.703	768.18	306.941	211.731	731.844	205.205	-203.32	652.308	645.404	-184.552	741.928	373.39	-118.578	756.443	398.725	-127.64	766.772	298.129	-99.9268	731.553	194.463
187	1.86	51.6304	1197.74	475.85	123.732	1198.16	518.13	-21.4476	1199.75	517.816	219.76	1036.72	647.999	-127.958	1038.45	674.47	31.1349	985.619	569.181	278.148	652.4	663.838	281.37	744.296	389.576	208.323	752.986	408.585	224.69	768.24	306.903	211.754	731.894	205.194	-203.316	652.328	645.412	-184.519	741.992	373.34	-118.546	756.535	398.623	-127.585	766.841	298.095	-99.9109	731.597	194.438
188	1.87	51.6878	1197.81	475.731	123.775	1198.2	518.143	-21.3938	1199.81	517.747	219.773	1036.74	647.962	-127.949	1038.48	674.45	31.1723	985.692	569.092	278.158	652.424	663.844	281.392	744.338	389.565	208.311	753.015	408.577	224.686	768.247	306.893	211.762	731.924	205.165	-203.311	652.33	645.363	-184.519	742.023	373.321	-118.54	756.574	398.571	-127.568	766.881	298.061	-99.9053	731.621	194.409
189	1.88	51.7114	1197.76	475.79	123.798	1198.16	518.164	-21.3748	1199.79	517.794	219.771	1036.73	647.962	-127.937	1038.47	674.445	31.1732	985.672	569.102	278.147	652.432	663.848	281.411	744.331	389.585	208.294	752.982	408.6	224.699	768.219	306.909	211.755	731.926	205.163	-203.324	652.337	645.35	-184.528	742.009	373.363	-118.549	756.531	398.636	-127.6	766.883	298.069	-99.9156	731.605	194.425
190	1.89	51.722	1197.63	475.979	123.825	1198.07	518.255	-21.3831	1199.73	517.849	219.756	1036.7	647.963	-127.924	1038.42	674.466	31.1451	985.56	569.205	278.124	652.416	663.829	281.409	744.254	389.601	208.3	752.907	408.633	224.712	768.162	306.943	211.73	731.895	205.177	-203.33	652.331	645.365	-184.548	741.963	373.393	-118.559	756.441	398.719	-127.64	766.837	298.084	-99.924	731.566	194.443
191	1.9	51.7156	1197.49	476.171	123.839	1197.96	518.334	-21.402	1199.64	517.914	219.745	1036.64	647.945	-127.929	1038.35	674.459	31.1182	985.401	569.375	278.097	652.4	663.825	281.37	744.158	389.6	208.283	752.828	408.671	224.721	768.095	306.993	211.708	731.837	205.193	-203.344	652.332	645.383	-184.574	741.887	373.406	-118.578	756.347	398.772	-127.676	766.743	298.15	-99.9511	731.509	194.434
192	1.91	51.6915	1197.39	476.302	123.847	1197.9	518.385	-21.4202	1199.57	517.95	219.732	1036.59	647.943	-127.949	1038.28	674.409	31.0885	985.277	569.509	278.093	652.395	663.816	281.341	744.081	389.612	208.256	752.742	408.688	224.728	768.042	307.009	211.693	731.783	205.218	-203.35	652.349	645.43	-184.598	741.826	373.419	-118.603	756.279	398.792	-127.72	766.692	298.152	-99.9745	731.47	194.429
193	1.92	51.6915	1197.36	476.352	123.859	1197.87	518.409	-21.4245	1199.57	517.95	219.739	1036.58	647.92	-127.941	1038.27	674.395	31.0766	985.252	569.511	278.103	652.391	663.826	281.338	744.082	389.595	208.246	752.712	408.711	224.725	768.055	306.988	211.691	731.775	205.191	-203.333	652.34	645.396	-184.601	741.812	373.425	-118.599	756.27	398.806	-127.744	766.686	298.169	-99.9843	731.461	194.44
194	1.93	51.7145	1197.42	476.228	123.868	1197.92	518.34	-21.3952	1199.61	517.899	219.77	1036.6	647.904	-127.921	1038.32	674.402	31.1109	985.337	569.4	278.115	652.389	663.827	281.351	744.129	389.585	208.286	752.77	408.721	224.698	768.094	306.972	211.705	731.835	205.148	-203.312	652.34	645.354	-184.584	741.868	373.428	-118.605	756.318	398.793	-127.713	766.725	298.154	-99.9787	731.488	194.445
195	1.94	51.7625	1197.56	475.997	123.894	1198	518.279	-21.3531	1199.69	517.833	219.806	1036.63	647.887	-127.896	1038.4	674.396	31.1678	985.464	569.24	278.129	652.369	663.814	281.388	744.189	389.603	208.299	752.854	408.674	224.691	768.147	306.959	211.724	731.886	205.143	-203.3	652.346	645.366	-184.552	741.922	373.398	-118.583	756.414	398.733	-127.66	766.784	298.135	-99.9624	731.533	194.448
196	1.95	51.8421	1197.69	475.825	123.936	1198.06	518.241	-21.2692	1199.75	517.739	219.849	1036.65	647.876	-127.862	1038.44	674.379	31.2394	985.566	569.097	278.13	652.341	663.86	281.413	744.227	389.618	208.318	752.912	408.669	224.711	768.176	306.931	211.768	731.902	205.184	-203.285	652.35	645.382	-184.506	741.965	373.365	-118.53	756.493	398.667	-127.59	766.836	298.094	-99.9234	731.573	194.442
197	1.96	51.9004	1197.74	475.747	123.962	1198.07	518.197	-21.2087	1199.77	517.682	219.888	1036.65	647.875	-127.817	1038.46	674.374	31.288	985.619	569.031	278.14	652.326	663.916	281.436	744.244	389.643	208.333	752.95	408.663	224.736	768.181	306.928	211.796	731.908	205.189	-203.261	652.351	645.408	-184.479	741.991	373.347	-118.48	756.534	398.616	-127.536	766.853	298.075	-99.8756	731.584	194.432
198	1.97	51.9027	1197.7	475.724	123.943	1198.04	518.166	-21.2019	1199.75	517.687	219.894	1036.63	647.85	-127.807	1038.46	674.373	31.2546	985.583	569.09	278.146	652.329	663.916	281.433	744.238	389.646	208.328	752.946	408.662	224.74	768.184	306.904	211.782	731.89	205.177	-203.263	652.366	645.418	-184.469	741.972	373.34	-118.485	756.503	398.623	-127.547	766.845	298.093	-99.8804	731.576	194.428
199	1.98	51.8683	1197.59	475.882	123.93	1197.96	518.205	-21.2398	1199.69	517.743	219.862	1036.6	647.833	-127.836	1038.43	674.349	31.215	985.466	569.257	278.141	652.328	663.872	281.406	744.208	389.641	208.305	752.883	408.665	224.726	768.161	306.958	211.749	731.867	205.18	-203.284	652.395	645.402	-184.508	741.922	373.388	-118.541	756.438	398.688	-127.619	766.791	298.132	-99.9234	731.544	194.454
200	1.99	51.8309	1197.51	476.023	123.94	1197.88	518.279	-21.2784	1199.65	517.795	219.834	1036.58	647.833	-127.854	1038.41	674.352	31.1902	985.354	569.415	278.123	652.322	663.843	281.388	744.17	389.657	208.271	752.823	408.681	224.724	768.146	307.03	211.714	731.846	205.175	-203.309	652.415	645.406	-184.563	741.887	373.427	-118.578	756.374	398.768	-127.674	766.746	298.182	-99.9537	731.522	194.491
201	2	51.8354	1197.46	476.048	123.947	1197.86	518.295	-21.2821	1199.63	517.804	219.828	1036.56	647.822	-127.855	1038.39	674.37	31.1742	985.32	569.393	278.087	652.266	663.78	281.364	744.144	389.629	208.266	752.8	408.706	224.734	768.137	307.008	211.702	731.829	205.175	-203.332	652.426	645.452	-184.585	741.865	373.434	-118.599	756.36	398.808	-127.692	766.721	298.19	-99.9635	731.5	194.469
202	2.01	51.8821	1197.43	475.993	123.97	1197.84	518.276	-21.2476	1199.63	517.732	219.841	1036.55	647.796	-127.833	1038.39	674.371	31.1885	985.324	569.35	278.076	652.219	663.761	281.372	744.12	389.645	208.292	752.803	408.699	224.753	768.117	306.994	211.723	731.821	205.201	-203.347	652.407	645.455	-184.575	741.875	373.412	-118.588	756.362	398.783	-127.668	766.727	298.165	-99.9548	731.497	194.435
203	2.02	51.9531	1197.46	475.921	124.01	1197.85	518.271	-21.1906	1199.65	517.661	219.868	1036.56	647.797	-127.804	1038.4	674.368	31.2542	985.352	569.306	278.086	652.228	663.762	281.418	744.119	389.698	208.321	752.824	408.688	224.774	768.076	307.027	211.766	731.829	205.239	-203.345	652.401	645.425	-184.533	741.889	373.407	-118.548	756.369	398.763	-127.622	766.748	298.12	-99.9295	731.513	194.426
204	2.03	51.9926	1197.5	475.887	124.04	1197.87	518.267	-21.1603	1199.68	517.616	219.894	1036.59	647.784	-127.776	1038.43	674.379	31.272	985.397	569.204	278.117	652.255	663.763	281.45	744.162	389.672	208.368	752.839	408.703	224.767	768.071	307.014	211.79	731.864	205.237	-203.318	652.426	645.436	-184.505	741.928	373.368	-118.506	756.412	398.723	-127.593	766.781	298.109	-99.9031	731.536	194.445
205	2.04	51.9868	1197.56	475.831	124.033	1197.9	518.232	-21.1458	1199.71	517.596	219.894	1036.61	647.783	-127.775	1038.45	674.369	31.2511	985.461	569.139	278.131	652.278	663.778	281.433	744.22	389.64	208.371	752.871	408.71	224.721	768.121	306.966	211.781	731.907	205.208	-203.3	652.451	645.445	-184.528	741.963	373.373	-118.503	756.445	398.703	-127.601	766.813	298.136	-99.905	731.56	194.424
206	2.05	51.9674	1197.56	475.795	124.005	1197.9	518.212	-21.1628	1199.72	517.605	219.872	1036.62	647.792	-127.81	1038.45	674.335	31.2274	985.461	569.154	278.134	652.29	663.828	281.387	744.239	389.625	208.327	752.899	408.669	224.692	768.164	306.987	211.762	731.897	205.201	-203.315	652.398	645.377	-184.559	741.967	373.396	-118.543	756.463	398.698	-127.629	766.818	298.123	-99.9438	731.559	194.424
207	2.06	51.9496	1197.52	475.768	123.983	1197.87	518.186	-21.1947	1199.67	517.619	219.852	1036.59	647.786	-127.847	1038.41	674.28	31.1966	985.386	569.208	278.118	652.258	663.825	281.355	744.211	389.618	208.297	752.882	408.67	224.688	768.172	306.962	211.734	731.856	205.189	-203.317	652.36	645.395	-184.573	741.934	373.389	-118.59	756.432	398.711	-127.661	766.773	298.115	-99.9504	731.529	194.455
208	2.07	51.9459	1197.45	475.804	123.969	1197.83	518.186	-21.2217	1199.61	517.635	219.826	1036.55	647.769	-127.858	1038.36	674.249	31.1607	985.291	569.26	278.123	652.27	663.833	281.34	744.169	389.61	208.247	752.85	408.638	224.7	768.154	306.909	211.718	731.82	205.171	-203.305	652.36	645.435	-184.578	741.89	373.397	-118.621	756.381	398.753	-127.682	766.717	298.15	-99.9538	731.501	194.476
209	2.08	51.9404	1197.42	475.842	123.953	1197.8	518.191	-21.2498	1199.58	517.67	219.815	1036.54	647.763	-127.862	1038.33	674.213	31.1446	985.195	569.321	278.13	652.297	663.816	281.335	744.155	389.604	208.225	752.816	408.626	224.725	768.137	306.928	211.709	731.822	205.161	-203.308	652.343	645.391	-184.575	741.86	373.424	-118.628	756.336	398.793	-127.697	766.69	298.192	-99.9769	731.486	194.464
210	2.09	51.9157	1197.42	475.871	123.965	1197.81	518.226	-21.2755	1199.57	517.669	219.815	1036.58	647.757	-127.868	1038.31	674.201	31.1545	985.166	569.35	278.128	652.322	663.808	281.351	744.157	389.599	208.237	752.81	408.635	224.7	768.14	306.955	211.703	731.862	205.141	-203.319	652.336	645.404	-184.583	741.856	373.442	-118.607	756.325	398.79	-127.714	766.701	298.211	-99.9875	731.49	194.468
211	2.1	51.9202	1197.47	475.821	123.973	1197.85	518.205	-21.267	1199.59	517.645	219.819	1036.63	647.766	-127.853	1038.31	674.22	31.1849	985.222	569.279	278.104	652.36	663.824	281.379	744.195	389.595	208.267	752.843	408.639	224.695	768.132	307.004	211.707	731.902	205.16	-203.324	652.317	645.414	-184.576	741.887	373.439	-118.589	756.365	398.77	-127.691	766.755	298.223	-99.9732	731.521	194.492
212	2.11	51.9502	1197.52	475.706	123.997	1197.89	518.19	-21.2376	1199.62	517.568	219.842	1036.67	647.784	-127.835	1038.32	674.223	31.234	985.29	569.161	278.095	652.365	663.838	281.419	744.225	389.647	208.317	752.871	408.643	224.731	768.107	307.037	211.749	731.918	205.199	-203.329	652.289	645.434	-184.541	741.925	373.406	-118.543	756.4	398.757	-127.633	766.805	298.183	-99.9432	731.539	194.489
213	2.12	51.9826	1197.5	475.628	124.007	1197.89	518.154	-21.2062	1199.6	517.473	219.888	1036.67	647.737	-127.807	1038.31	674.185	31.3041	985.311	569.07	278.105	652.328	663.806	281.455	744.206	389.671	208.368	752.881	408.658	224.784	768.088	307.01	211.805	731.884	205.237	-203.315	652.256	645.448	-184.495	741.927	373.387	-118.482	756.4	398.732	-127.564	766.811	298.123	-99.9039	731.542	194.463
214	2.13	51.981	1197.46	475.584	123.979	1197.89	518.108	-21.2111	1199.54	517.429	219.908	1036.65	647.694	-127.783	1038.28	674.13	31.3421	985.263	569.048	278.145	652.311	663.756	281.47	744.196	389.666	208.381	752.871	408.627	224.803	768.103	306.939	211.82	731.871	205.218	-203.283	652.22	645.415	-184.464	741.923	373.346	-118.464	756.393	398.721	-127.538	766.787	298.096	-99.9	731.545	194.417
215	2.14	51.8908	1197.39	475.622	123.913	1197.87	518.065	-21.2882	1199.48	517.461	219.885	1036.63	647.686	-127.81	1038.27	674.107	31.2844	985.195	569.17	278.193	652.327	663.741	281.448	744.192	389.668	208.352	752.85	408.673	224.775	768.143	306.923	211.79	731.855	205.226	-203.248	652.202	645.377	-184.502	741.895	373.386	-118.523	756.363	398.787	-127.584	766.742	298.171	-99.9188	731.523	194.448
216	2.15	51.7415	1197.33	475.618	123.841	1197.82	518.034	-21.4005	1199.42	517.537	219.853	1036.6	647.68	-127.863	1038.25	674.112	31.2063	985.14	569.295	278.237	652.357	663.774	281.411	744.162	389.677	208.292	752.834	408.721	224.733	768.152	306.969	211.733	731.827	205.242	-203.221	652.22	645.385	-184.565	741.855	373.452	-118.601	756.317	398.86	-127.671	766.698	298.264	-99.9506	731.508	194.49
217	2.16	51.6267	1197.27	475.598	123.768	1197.79	517.956	-21.4841	1199.38	517.541	219.832	1036.57	647.674	-127.906	1038.25	674.106	31.1481	985.133	569.309	278.238	652.321	663.749	281.368	744.139	389.661	208.263	752.809	408.719	224.689	768.15	306.995	211.699	731.823	205.234	-203.21	652.237	645.427	-184.608	741.842	373.465	-118.627	756.31	398.841	-127.737	766.688	298.291	-99.9944	731.492	194.498
218	2.17	51.5975	1197.27	475.587	123.747	1197.79	517.883	-21.5005	1199.4	517.478	219.833	1036.57	647.651	-127.918	1038.27	674.104	31.1413	985.134	569.3	278.193	652.262	663.729	281.356	744.143	389.639	208.276	752.812	408.728	224.691	768.139	307.025	211.698	731.842	205.229	-203.205	652.273	645.507	-184.587	741.849	373.453	-118.607	756.343	398.812	-127.729	766.719	298.233	-99.9929	731.486	194.512
219	2.18	51.6305	1197.3	475.446	123.775	1197.81	517.832	-21.459	1199.44	517.361	219.849	1036.59	647.602	-127.891	1038.32	674.101	31.1834	985.179	569.179	278.172	652.29	663.772	281.38	744.179	389.629	208.318	752.849	408.726	224.712	768.128	307.006	211.726	731.871	205.227	-203.205	652.304	645.56	-184.534	741.881	373.429	-118.545	756.375	398.777	-127.66	766.777	298.149	-99.9548	731.515	194.492
220	2.19	51.655	1197.38	475.206	123.784	1197.81	517.729	-21.4101	1199.47	517.24	219.868	1036.64	647.54	-127.872	1038.36	674.082	31.2178	985.246	569.032	278.175	652.365	663.795	281.396	744.217	389.595	208.353	752.886	408.691	224.722	768.105	306.964	211.752	731.919	205.186	-203.197	652.344	645.576	-184.489	741.917	373.377	-118.482	756.421	398.692	-127.608	766.811	298.102	-99.9173	731.548	194.427
221	2.2	51.6561	1197.37	475.169	123.767	1197.8	517.653	-21.4208	1199.48	517.187	219.862	1036.67	647.494	-127.863	1038.37	674.088	31.2176	985.263	568.978	278.17	652.394	663.792	281.411	744.249	389.579	208.361	752.899	408.703	224.719	768.096	306.973	211.76	731.942	205.164	-203.188	652.354	645.574	-184.487	741.935	373.396	-118.479	756.447	398.679	-127.603	766.84	298.1	-99.9159	731.551	194.416
222	2.21	51.5982	1197.3	475.245	123.727	1197.76	517.627	-21.4866	1199.47	517.233	219.836	1036.66	647.446	-127.886	1038.34	674.103	31.1501	985.201	569.039	278.152	652.361	663.761	281.407	744.233	389.605	208.34	752.882	408.719	224.704	768.103	306.987	211.742	731.908	205.169	-203.18	652.306	645.526	-184.514	741.916	373.424	-118.525	756.427	398.731	-127.649	766.826	298.128	-99.9429	731.55	194.457
223	2.22	51.5131	1197.21	475.261	123.672	1197.7	517.605	-21.55	1199.41	517.271	219.797	1036.63	647.438	-127.924	1038.28	674.094	31.0798	985.096	569.162	278.152	652.339	663.77	281.381	744.177	389.665	208.292	752.851	408.709	224.679	768.104	306.96	211.723	731.85	205.181	-203.169	652.237	645.49	-184.554	741.868	373.439	-118.582	756.392	398.765	-127.693	766.763	298.146	-99.9636	731.523	194.49
224	2.23	51.4594	1197.13	475.251	123.621	1197.65	517.568	-21.5863	1199.32	517.294	219.776	1036.59	647.415	-127.952	1038.24	674.067	31.044	985.028	569.236	278.185	652.342	663.82	281.347	744.128	389.649	208.25	752.814	408.717	224.688	768.109	306.939	211.708	731.799	205.176	-203.153	652.186	645.434	-184.586	741.815	373.442	-118.622	756.348	398.778	-127.722	766.698	298.137	-99.9762	731.485	194.485
225	2.24	51.4635	1197.09	475.267	123.594	1197.62	517.571	-21.613	1199.28	517.259	219.771	1036.58	647.406	-127.967	1038.22	674.046	31.0466	985.003	569.263	278.213	652.359	663.81	281.344	744.124	389.637	208.258	752.795	408.746	224.702	768.131	306.928	211.716	731.783	205.196	-203.159	652.178	645.385	-184.596	741.8	373.461	-118.634	756.337	398.792	-127.737	766.677	298.149	-99.9799	731.479	194.465
226	2.25	51.4952	1197.11	475.236	123.601	1197.64	517.546	-21.5996	1199.28	517.213	219.775	1036.6	647.414	-127.972	1038.23	674.028	31.0566	985.02	569.25	278.216	652.377	663.793	281.351	744.166	389.605	208.268	752.814	408.708	224.682	768.149	306.919	211.728	731.812	205.186	-203.171	652.201	645.394	-184.586	741.836	373.463	-118.618	756.363	398.771	-127.722	766.718	298.168	-99.9704	731.504	194.445
227	2.26	51.5118	1197.15	475.106	123.616	1197.67	517.523	-21.5835	1199.3	517.124	219.779	1036.65	647.413	-127.974	1038.26	674.018	31.0702	985.064	569.166	278.197	652.401	663.789	281.348	744.227	389.577	208.27	752.878	408.647	224.667	768.166	306.948	211.732	731.875	205.167	-203.185	652.229	645.431	-184.573	741.881	373.439	-118.594	756.406	398.732	-127.703	766.784	298.178	-99.955	731.544	194.449
228	2.27	51.5344	1197.22	474.999	123.63	1197.71	517.522	-21.5671	1199.34	517.053	219.778	1036.68	647.413	-127.969	1038.28	674.017	31.1116	985.127	569.064	278.153	652.392	663.781	281.366	744.263	389.592	208.295	752.924	408.659	224.702	768.153	307.008	211.742	731.916	205.188	-203.215	652.234	645.467	-184.549	741.916	373.423	-118.562	756.459	398.715	-127.665	766.852	298.142	-99.9333	731.575	194.442
229	2.28	51.5653	1197.25	474.984	123.656	1197.73	517.517	-21.5496	1199.35	516.988	219.786	1036.69	647.418	-127.948	1038.29	674.041	31.1521	985.172	569.027	278.128	652.358	663.749	281.389	744.283	389.613	208.325	752.94	408.643	224.738	768.131	307.028	211.764	731.932	205.212	-203.242	652.256	645.544	-184.525	741.945	373.409	-118.52	756.499	398.682	-127.628	766.9	298.125	-99.9139	731.583	194.429
230	2.29	51.563	1197.21	474.961	123.643	1197.72	517.485	-21.5555	1199.3	516.949	219.789	1036.69	647.407	-127.938	1038.27	674.049	31.1601	985.143	569.03	278.141	652.336	663.705	281.408	744.266	389.627	208.345	752.92	408.642	224.728	768.116	306.984	211.766	731.925	205.199	-203.251	652.264	645.568	-184.517	741.94	373.397	-118.508	756.478	398.656	-127.602	766.879	298.103	-99.9072	731.578	194.391
231	2.3	51.5126	1197.13	475.068	123.618	1197.67	517.51	-21.6127	1199.24	516.978	219.772	1036.68	647.4	-127.955	1038.22	674.017	31.1247	985.055	569.104	278.186	652.381	663.733	281.413	744.23	389.634	208.352	752.875	408.682	224.734	768.103	307.001	211.772	731.889	205.202	-203.227	652.222	645.485	-184.532	741.897	373.386	-118.515	756.41	398.702	-127.62	766.836	298.121	-99.9162	731.552	194.405
232	2.31	51.4249	1197.06	475.214	123.555	1197.63	517.536	-21.7077	1199.17	517.072	219.724	1036.66	647.422	-128.008	1038.19	674.01	31.0672	984.942	569.297	278.218	652.415	663.764	281.391	744.187	389.655	208.314	752.829	408.721	224.735	768.101	307.041	211.749	731.841	205.237	-203.198	652.173	645.41	-184.571	741.85	373.406	-118.576	756.354	398.757	-127.679	766.763	298.183	-99.9645	731.527	194.446
233	2.32	51.2951	1197.04	475.2	123.431	1197.61	517.474	-21.7941	1199.13	517.121	219.679	1036.63	647.459	-128.067	1038.17	674.024	31.0048	984.906	569.334	278.234	652.388	663.748	281.349	744.162	389.638	208.232	752.806	408.681	224.685	768.146	306.985	211.698	731.805	205.24	-203.176	652.145	645.416	-184.625	741.832	373.447	-118.653	756.339	398.793	-127.738	766.723	298.24	-99.9993	731.49	194.485
234	2.33	51.1887	1197.06	475.105	123.359	1197.62	517.428	-21.8512	1199.12	517.132	219.654	1036.62	647.466	-128.099	1038.14	674.037	30.9544	984.932	569.282	278.241	652.37	663.772	281.322	744.152	389.613	208.195	752.819	408.624	224.643	768.176	306.94	211.678	731.788	205.211	-203.159	652.132	645.467	-184.624	741.825	373.445	-118.677	756.356	398.791	-127.765	766.718	298.264	-100.012	731.478	194.491
235	2.34	51.1901	1197.05	475.177	123.36	1197.64	517.42	-21.8728	1199.15	517.17	219.653	1036.64	647.465	-128.089	1038.14	674.06	30.9424	984.937	569.304	278.246	652.402	663.83	281.334	744.175	389.64	208.231	752.835	408.661	224.642	768.153	306.939	211.693	731.808	205.244	-203.144	652.133	645.51	-184.607	741.845	373.443	-118.652	756.37	398.782	-127.769	766.747	298.228	-100.012	731.505	194.507
236	2.35	51.2025	1197.08	475.191	123.363	1197.68	517.41	-21.8598	1199.21	517.149	219.657	1036.68	647.461	-128.081	1038.16	674.095	30.9793	984.986	569.227	278.236	652.457	663.854	281.364	744.222	389.632	208.274	752.86	408.686	224.664	768.126	306.958	211.716	731.85	205.24	-203.134	652.14	645.5	-184.584	741.881	373.423	-118.597	756.389	398.746	-127.733	766.799	298.161	-99.9831	731.527	194.461
237	2.36	51.2015	1197.17	475.127	123.362	1197.73	517.366	-21.8373	1199.28	517.142	219.681	1036.74	647.457	-128.055	1038.17	674.109	31.0258	985.065	569.115	278.212	652.488	663.827	281.375	744.278	389.584	208.309	752.89	408.668	224.668	768.112	306.917	211.737	731.907	205.199	-203.126	652.186	645.542	-184.538	741.918	373.387	-118.538	756.444	398.684	-127.667	766.859	298.118	-99.9424	731.568	194.421
238	2.37	51.1989	1197.24	475.074	123.372	1197.77	517.378	-21.8361	1199.31	517.154	219.685	1036.76	647.463	-128.041	1038.18	674.149	31.0431	985.104	569.067	278.18	652.484	663.789	281.38	744.308	389.558	208.323	752.904	408.642	224.683	768.105	306.921	211.75	731.929	205.179	-203.121	652.22	645.607	-184.513	741.935	373.381	-118.499	756.475	398.67	-127.638	766.901	298.083	-99.9182	731.611	194.428
239	2.38	51.1576	1197.26	475.155	123.363	1197.78	517.424	-21.8664	1199.31	517.197	219.653	1036.76	647.474	-128.064	1038.17	674.192	31.022	985.08	569.106	278.154	652.49	663.799	281.362	744.306	389.586	208.293	752.91	408.625	224.69	768.124	306.966	211.74	731.906	205.213	-203.125	652.188	645.606	-184.533	741.914	373.409	-118.511	756.482	398.675	-127.645	766.887	298.079	-99.9242	731.594	194.456
240	2.39	51.0781	1197.22	475.195	123.302	1197.79	517.429	-21.9179	1199.29	517.231	219.629	1036.73	647.476	-128.104	1038.14	674.2	30.9752	984.998	569.216	278.141	652.452	663.778	281.325	744.263	389.584	208.251	752.899	408.593	224.667	768.138	306.924	211.718	731.883	205.194	-203.119	652.125	645.575	-184.559	741.874	373.393	-118.547	756.429	398.709	-127.674	766.832	298.108	-99.9526	731.547	194.451
241	2.4	51.0034	1197.18	475.251	123.214	1197.79	517.411	-21.9733	1199.24	517.28	219.615	1036.69	647.489	-128.126	1038.1	674.204	30.9314	984.954	569.308	278.182	652.448	663.796	281.31	744.229	389.566	208.227	752.858	408.593	224.655	768.161	306.901	211.698	731.848	205.159	-203.095	652.097	645.559	-184.572	741.84	373.405	-118.595	756.377	398.771	-127.7	766.751	298.153	-99.9692	731.517	194.445
242	2.41	50.9533	1197.18	475.381	123.16	1197.82	517.449	-22.0423	1199.23	517.357	219.599	1036.69	647.512	-128.134	1038.09	674.213	30.9042	984.939	569.414	278.229	652.475	663.794	281.32	744.221	389.597	208.206	752.84	408.635	224.65	768.193	306.903	211.696	731.827	205.184	-203.058	652.093	645.558	-184.588	741.841	373.416	-118.628	756.348	398.817	-127.732	766.71	298.273	-99.9833	731.522	194.472
243	2.42	50.9282	1197.24	475.407	123.138	1197.88	517.451	-22.0677	1199.26	517.367	219.588	1036.7	647.528	-128.141	1038.09	674.226	30.9048	984.955	569.421	278.246	652.506	663.812	281.336	744.245	389.612	208.212	752.851	408.662	224.654	768.193	306.94	211.703	731.831	205.212	-203.03	652.064	645.523	-184.603	741.853	373.439	-118.635	756.369	398.811	-127.739	766.731	298.282	-99.9958	731.541	194.484
244	2.43	50.9506	1197.3	475.403	123.142	1197.91	517.441	-22.0417	1199.28	517.382	219.588	1036.72	647.526	-128.132	1038.07	674.216	30.9287	984.985	569.337	278.224	652.505	663.831	281.366	744.251	389.619	208.228	752.877	408.638	224.665	768.157	306.959	211.733	731.835	205.242	-203.034	652.027	645.503	-184.579	741.86	373.446	-118.609	756.394	398.777	-127.702	766.767	298.218	-99.9844	731.539	194.457
245	2.44	50.9922	1197.34	475.415	123.186	1197.95	517.495	-22.0151	1199.29	517.392	219.612	1036.74	647.54	-128.099	1038.06	674.248	30.9745	985.006	569.264	278.22	652.488	663.84	281.412	744.236	389.675	208.287	752.877	408.685	224.706	768.104	307	211.767	731.837	205.273	-203.038	652.026	645.561	-184.525	741.858	373.433	-118.529	756.393	398.762	-127.668	766.825	298.149	-99.9348	731.551	194.479
246	2.45	50.9893	1197.4	475.389	123.198	1197.98	517.532	-22.01	1199.32	517.425	219.62	1036.76	647.543	-128.08	1038.05	674.266	31.008	985.012	569.279	278.219	652.496	663.835	281.418	744.258	389.67	208.332	752.877	408.706	224.732	768.074	307.043	211.78	731.864	205.264	-203.038	652.044	645.594	-184.503	741.871	373.425	-118.501	756.404	398.765	-127.66	766.857	298.157	-99.9169	731.568	194.463
247	2.46	50.9363	1197.42	475.329	123.126	1198.02	517.468	-22.0338	1199.34	517.361	219.593	1036.78	647.523	-128.1	1038.06	674.256	30.9882	985.036	569.281	278.21	652.528	663.813	281.384	744.293	389.598	208.31	752.888	408.685	224.702	768.095	307.009	211.747	731.893	205.218	-203.059	652.088	645.611	-184.512	741.889	373.405	-118.53	756.436	398.73	-127.663	766.862	298.143	-99.927	731.574	194.435
248	2.47	50.861	1197.39	475.359	123.054	1198.03	517.436	-22.0919	1199.32	517.345	219.572	1036.77	647.547	-128.141	1038.06	674.254	30.9337	985.04	569.279	278.199	652.544	663.817	281.328	744.295	389.567	208.257	752.901	408.665	224.661	768.136	306.955	211.702	731.901	205.175	-203.055	652.125	645.656	-184.548	741.901	373.41	-118.57	756.438	398.717	-127.683	766.831	298.141	-99.9449	731.571	194.453
249	2.48	50.7921	1197.35	475.398	123.008	1198.01	517.448	-22.1674	1199.28	517.411	219.54	1036.76	647.579	-128.179	1038.05	674.237	30.8923	985	569.323	278.191	652.529	663.815	281.297	744.284	389.578	208.23	752.882	408.66	224.65	768.16	306.944	211.668	731.878	205.156	-203.059	652.122	645.684	-184.577	741.874	373.443	-118.61	756.397	398.764	-127.715	766.779	298.168	-99.9717	731.544	194.491
250	2.49	50.744	1197.29	475.399	122.95	1197.96	517.413	-22.2229	1199.24	517.417	219.506	1036.72	647.572	-128.196	1038.04	674.232	30.8662	984.96	569.37	278.183	652.491	663.789	281.274	744.258	389.565	208.184	752.849	408.62	224.641	768.179	306.907	211.659	731.832	205.156	-203.054	652.088	645.659	-184.601	741.829	373.461	-118.637	756.364	398.779	-127.742	766.74	298.208	-99.9929	731.513	194.486
251	2.5	50.7308	1197.28	475.378	122.935	1197.93	517.376	-22.2298	1199.22	517.376	219.501	1036.7	647.57	-128.188	1038.03	674.242	30.8578	984.95	569.384	278.197	652.482	663.788	281.283	744.24	389.583	208.183	752.834	408.623	224.646	768.16	306.91	211.68	731.807	205.176	-203.042	652.046	645.606	-184.602	741.813	373.452	-118.634	756.351	398.763	-127.739	766.731	298.193	-99.9902	731.508	194.494
252	2.51	50.7465	1197.28	475.379	122.963	1197.92	517.421	-22.2053	1199.23	517.405	219.506	1036.73	647.576	-128.176	1038.02	674.262	30.8682	984.97	569.393	278.234	652.504	663.842	281.336	744.229	389.634	208.228	752.823	408.669	224.673	768.122	307.017	211.703	731.825	205.231	-203.022	652.024	645.564	-184.582	741.835	373.452	-118.615	756.344	398.805	-127.73	766.751	298.218	-99.9846	731.528	194.511
253	2.52	50.771	1197.3	475.356	123.016	1197.92	517.48	-22.1807	1199.26	517.397	219.535	1036.77	647.569	-128.157	1038.03	674.268	30.8861	984.998	569.379	278.267	652.536	663.875	281.39	744.24	389.696	208.268	752.844	408.708	224.692	768.089	307.042	211.737	731.855	205.289	-203.016	652.021	645.529	-184.566	741.865	373.481	-118.588	756.374	398.811	-127.725	766.81	298.22	-99.9653	731.558	194.489
254	2.53	50.8225	1197.33	475.333	123.058	1197.94	517.449	-22.1496	1199.29	517.311	219.56	1036.8	647.544	-128.136	1038.04	674.261	30.9243	985.034	569.29	278.265	652.534	663.867	281.425	744.268	389.684	208.301	752.866	408.717	224.717	768.076	307.013	211.766	731.868	205.286	-203.028	652.01	645.496	-184.537	741.889	373.446	-118.538	756.399	398.751	-127.677	766.856	298.18	-99.9324	731.567	194.451
255	2.54	50.8729	1197.33	475.251	123.069	1197.94	517.372	-22.1335	1199.29	517.236	219.566	1036.79	647.527	-128.132	1038.04	674.24	30.9491	985.063	569.215	278.218	652.495	663.83	281.434	744.269	389.668	208.309	752.889	408.687	224.727	768.086	306.982	211.768	731.875	205.255	-203.053	651.997	645.513	-184.508	741.891	373.408	-118.5	756.412	398.698	-127.625	766.86	298.095	-99.9113	731.561	194.429
256	2.55	50.8571	1197.32	475.172	123.055	1197.97	517.346	-22.1361	1199.25	517.223	219.538	1036.78	647.534	-128.153	1038.04	674.204	30.9252	985.041	569.227	278.167	652.511	663.836	281.378	744.294	389.63	208.286	752.898	408.65	224.717	768.136	306.941	211.739	731.879	205.195	-203.08	652.017	645.579	-184.524	741.874	373.413	-118.526	756.399	398.718	-127.639	766.823	298.103	-99.9277	731.559	194.437
257	2.56	50.7844	1197.28	475.097	123.005	1197.96	517.323	-22.1762	1199.22	517.203	219.502	1036.76	647.518	-128.189	1038.05	674.17	30.8803	985.016	569.267	278.162	652.565	663.892	281.302	744.298	389.58	208.222	752.886	408.613	224.678	768.197	306.881	211.692	731.862	205.163	-203.1	652.066	645.611	-184.564	741.861	373.403	-118.59	756.387	398.745	-127.673	766.762	298.143	-99.9556	731.554	194.428
258	2.57	50.7317	1197.22	475.121	122.934	1197.93	517.256	-22.2206	1199.17	517.222	219.467	1036.75	647.476	-128.221	1038.05	674.124	30.8483	984.968	569.357	278.145	652.61	663.89	281.256	744.285	389.554	208.168	752.869	408.586	224.64	768.202	306.871	211.658	731.835	205.15	-203.103	652.105	645.6	-184.606	741.842	373.401	-118.64	756.379	398.761	-127.718	766.719	298.189	-99.9764	731.534	194.451
259	2.58	50.7037	1197.19	475.155	122.892	1197.91	517.226	-22.2355	1199.15	517.19	219.453	1036.75	647.468	-128.241	1038.05	674.122	30.8336	984.958	569.347	278.124	652.612	663.873	281.244	744.277	389.537	208.168	752.849	408.601	224.625	768.187	306.912	211.647	731.838	205.127	-203.11	652.107	645.584	-184.627	741.834	373.433	-118.666	756.363	398.785	-127.746	766.726	298.231	-99.9872	731.529	194.462
260	2.59	50.7144	1197.2	475.13	122.917	1197.9	517.236	-22.2242	1199.17	517.151	219.463	1036.76	647.481	-128.226	1038.05	674.138	30.8405	984.975	569.287	278.123	652.588	663.908	281.273	744.282	389.588	208.191	752.878	408.629	224.648	768.164	306.975	211.668	731.847	205.168	-203.115	652.064	645.544	-184.621	741.843	373.442	-118.657	756.374	398.795	-127.746	766.752	298.232	-99.9873	731.536	194.484
261	2.6	50.7732	1197.23	475.028	122.993	1197.89	517.226	-22.176	1199.19	517.074	219.499	1036.78	647.453	-128.203	1038.04	674.115	30.8842	985.002	569.204	278.145	652.568	663.93	281.345	744.269	389.62	208.231	752.897	408.601	224.687	768.124	306.988	211.723	731.857	205.217	-203.112	651.995	645.458	-184.578	741.843	373.4	-118.591	756.389	398.767	-127.709	766.799	298.163	-99.9624	731.546	194.461
262	2.61	50.8288	1197.24	474.933	123.05	1197.89	517.223	-22.1213	1199.21	516.987	219.534	1036.79	647.408	-128.17	1038.04	674.089	30.943	985.034	569.133	278.175	652.546	663.906	281.408	744.26	389.649	208.283	752.893	408.611	224.707	768.081	306.98	211.77	731.874	205.237	-203.115	651.964	645.427	-184.539	741.865	373.358	-118.547	756.404	398.726	-127.674	766.838	298.099	-99.944	731.555	194.44
263	2.62	50.8391	1197.23	474.926	123.06	1197.87	517.234	-22.1309	1199.2	516.957	219.534	1036.8	647.407	-128.153	1038.04	674.074	30.9504	985.016	569.14	278.206	652.556	663.896	281.424	744.248	389.656	208.324	752.865	408.698	224.709	768.055	307.006	211.766	731.878	205.25	-203.114	651.971	645.428	-184.537	741.87	373.387	-118.545	756.393	398.745	-127.67	766.848	298.115	-99.9439	731.554	194.429
264	2.63	50.8003	1197.19	474.959	123.025	1197.82	517.245	-22.1755	1199.16	516.977	219.511	1036.81	647.417	-128.165	1038.04	674.047	30.9082	984.973	569.219	278.206	652.589	663.895	281.397	744.243	389.655	208.314	752.842	408.721	224.678	768.07	307.014	211.735	731.869	205.242	-203.108	651.988	645.42	-184.563	741.851	373.412	-118.579	756.361	398.808	-127.719	766.825	298.145	-99.9695	731.545	194.44
265	2.64	50.7438	1197.12	474.969	122.977	1197.8	517.237	-22.2304	1199.11	516.937	219.489	1036.78	647.388	-128.192	1038.03	674.012	30.8664	984.938	569.25	278.192	652.579	663.869	281.344	744.235	389.617	208.258	752.844	408.67	224.652	768.102	306.959	211.698	731.84	205.204	-203.121	652.007	645.462	-184.605	741.825	373.428	-118.632	756.337	398.808	-127.753	766.769	298.146	-99.9941	731.528	194.443
266	2.65	50.6966	1197.1	474.886	122.928	1197.81	517.171	-22.2592	1199.08	516.904	219.466	1036.76	647.36	-128.217	1038.04	673.982	30.8497	984.945	569.233	278.173	652.564	663.857	281.288	744.237	389.576	208.2	752.836	408.64	224.65	768.159	306.913	211.658	731.812	205.181	-203.151	652.039	645.535	-184.625	741.806	373.411	-118.658	756.358	398.773	-127.758	766.728	298.149	-100.01	731.511	194.451
267	2.66	50.6914	1197.12	474.838	122.895	1197.84	517.063	-22.2643	1199.08	516.877	219.459	1036.77	647.346	-128.236	1038.06	673.956	30.8497	984.974	569.188	278.148	652.565	663.813	281.248	744.265	389.525	208.195	752.845	408.666	224.64	768.198	306.889	211.64	731.816	205.159	-203.156	652.087	645.58	-184.639	741.817	373.396	-118.673	756.383	398.779	-127.749	766.711	298.177	-100.009	731.521	194.46
268	2.67	50.7137	1197.15	474.768	122.882	1197.86	516.99	-22.2341	1199.09	516.836	219.482	1036.77	647.317	-128.224	1038.08	673.927	30.8659	985	569.13	278.157	652.58	663.818	281.24	744.287	389.512	208.205	752.867	408.638	224.648	768.195	306.879	211.648	731.832	205.127	-203.143	652.105	645.576	-184.624	741.85	373.378	-118.661	756.396	398.774	-127.721	766.734	298.14	-99.9926	731.546	194.42
269	2.68	50.7574	1197.15	474.734	122.935	1197.85	517.003	-22.1988	1199.11	516.801	219.516	1036.8	647.278	-128.176	1038.08	673.927	30.8974	985.031	569.08	278.18	652.586	663.813	281.297	744.295	389.555	208.238	752.88	408.614	224.65	768.175	306.91	211.692	731.864	205.138	-203.135	652.097	645.545	-184.579	741.875	373.372	-118.609	756.415	398.734	-127.691	766.798	298.093	-99.9635	731.57	194.396
270	2.69	50.8199	1197.16	474.746	123.001	1197.83	517.057	-22.1537	1199.14	516.797	219.559	1036.81	647.277	-128.121	1038.1	673.964	30.9433	985.067	569.065	278.22	652.55	663.804	281.383	744.29	389.626	208.303	752.885	408.681	224.666	768.144	306.959	211.748	731.883	205.208	-203.121	652.06	645.496	-184.529	741.893	373.41	-118.538	756.429	398.726	-127.675	766.86	298.118	-99.9453	731.58	194.395
271	2.7	50.8661	1197.12	474.795	123.056	1197.81	517.081	-22.114	1199.15	516.779	219.587	1036.79	647.293	-128.09	1038.09	674.003	30.987	985.058	569.016	278.249	652.495	663.813	281.437	744.259	389.668	208.346	752.879	408.717	224.711	768.11	306.993	211.779	731.878	205.273	-203.096	651.997	645.456	-184.513	741.893	373.432	-118.518	756.438	398.739	-127.662	766.875	298.12	-99.9311	731.574	194.405
272	2.71	50.8921	1197.06	474.829	123.103	1197.75	517.122	-22.1125	1199.12	516.784	219.594	1036.77	647.281	-128.079	1038.05	673.996	31.0067	984.988	569.076	278.281	652.48	663.838	281.461	744.222	389.685	208.356	752.86	408.716	224.737	768.078	307.001	211.806	731.848	205.313	-203.081	651.957	645.415	-184.513	741.859	373.449	-118.526	756.393	398.761	-127.647	766.848	298.12	-99.923	731.549	194.424
273	2.72	50.8754	1197.01	474.827	123.097	1197.71	517.118	-22.1178	1199.05	516.819	219.592	1036.73	647.257	-128.077	1038.02	673.994	30.9956	984.9	569.176	278.295	652.505	663.871	281.442	744.193	389.691	208.33	752.826	408.724	224.735	768.069	307	211.79	731.825	205.286	-203.082	651.953	645.398	-184.525	741.82	373.469	-118.56	756.33	398.797	-127.669	766.791	298.136	-99.9334	731.508	194.447
274	2.73	50.8291	1196.98	474.829	123.037	1197.69	517.063	-22.1598	1199.02	516.819	219.567	1036.72	647.248	-128.102	1038.03	673.975	30.9346	984.893	569.174	278.278	652.536	663.878	281.367	744.193	389.634	208.255	752.823	408.7	224.71	768.112	306.968	211.721	731.808	205.204	-203.09	651.979	645.425	-184.565	741.802	373.463	-118.633	756.313	398.838	-127.706	766.734	298.2	-99.967	731.494	194.445
275	2.74	50.7848	1197.01	474.788	122.96	1197.72	516.981	-22.1844	1199.01	516.795	219.532	1036.72	647.229	-128.138	1038.06	673.93	30.8669	984.917	569.131	278.231	652.524	663.834	281.283	744.232	389.55	208.194	752.839	408.666	224.655	768.178	306.911	211.659	731.819	205.132	-203.1	652.044	645.502	-184.595	741.809	373.439	-118.672	756.329	398.843	-127.749	766.688	298.257	-100.008	731.493	194.455
276	2.75	50.7555	1197.03	474.755	122.92	1197.74	516.938	-22.1955	1199.02	516.787	219.516	1036.73	647.222	-128.16	1038.07	673.925	30.8605	984.944	569.132	278.166	652.516	663.81	281.243	744.267	389.525	208.163	752.86	408.668	224.618	768.207	306.913	211.646	731.838	205.122	-203.106	652.083	645.573	-184.621	741.83	373.467	-118.685	756.357	398.829	-127.769	766.712	298.238	-100.023	731.517	194.468
277	2.76	50.7805	1197.03	474.703	122.966	1197.75	516.96	-22.159	1199.05	516.773	219.54	1036.75	647.24	-128.153	1038.08	673.937	30.8883	984.975	569.128	278.143	652.497	663.797	281.26	744.292	389.561	208.19	752.874	408.682	224.623	768.182	306.947	211.658	731.867	205.117	-203.109	652.085	645.609	-184.623	741.847	373.49	-118.656	756.38	398.79	-127.755	766.763	298.225	-100.004	731.531	194.469
278	2.77	50.8732	1197.06	474.628	123.071	1197.74	516.99	-22.0877	1199.08	516.738	219.581	1036.76	647.235	-128.105	1038.08	673.927	30.9643	984.982	569.099	278.152	652.475	663.769	281.324	744.285	389.585	208.229	752.878	408.623	224.664	768.141	306.967	211.697	731.886	205.135	-203.109	652.074	645.613	-184.572	741.867	373.466	-118.578	756.409	398.736	-127.703	766.815	298.165	-99.9667	731.553	194.45
279	2.78	50.9739	1197.08	474.58	123.157	1197.73	516.992	-22.0272	1199.09	516.66	219.621	1036.76	647.206	-128.042	1038.09	673.898	31.0243	985.031	568.958	278.188	652.489	663.755	281.402	744.277	389.597	208.289	752.876	408.613	224.705	768.087	306.976	211.75	731.908	205.178	-203.092	652.075	645.562	-184.519	741.894	373.405	-118.508	756.417	398.693	-127.645	766.849	298.094	-99.9245	731.569	194.412
280	2.79	51.0149	1197.07	474.529	123.17	1197.72	516.984	-21.9999	1199.09	516.654	219.638	1036.77	647.22	-128.018	1038.09	673.903	31.0475	985.018	568.97	278.222	652.505	663.788	281.428	744.261	389.621	208.298	752.885	408.605	224.719	768.072	306.976	211.77	731.908	205.198	-203.076	652.062	645.492	-184.504	741.905	373.378	-118.507	756.409	398.734	-127.639	766.873	298.057	-99.9247	731.58	194.393
281	2.8	50.9946	1197.02	474.642	123.148	1197.69	517.002	-22.0421	1199.05	516.68	219.625	1036.75	647.255	-128.039	1038.07	673.919	31.0083	984.968	569.014	278.223	652.485	663.801	281.416	744.218	389.654	208.269	752.867	408.59	224.704	768.072	306.959	211.749	731.874	205.204	-203.076	652.024	645.47	-184.54	741.869	373.383	-118.557	756.379	398.786	-127.676	766.831	298.105	-99.945	731.552	194.412
282	2.81	50.9563	1196.95	474.722	123.114	1197.63	517.038	-22.0815	1198.99	516.736	219.602	1036.71	647.282	-128.059	1038.03	673.905	30.9545	984.89	569.132	278.226	652.464	663.807	281.392	744.164	389.653	208.247	752.803	408.647	224.702	768.084	306.986	211.718	731.821	205.206	-203.088	651.973	645.427	-184.58	741.805	373.45	-118.61	756.324	398.821	-127.724	766.77	298.134	-99.9762	731.502	194.456
283	2.82	50.9201	1196.91	474.752	123.099	1197.61	517.082	-22.0974	1198.96	516.803	219.585	1036.67	647.252	-128.078	1038	673.886	30.9273	984.861	569.218	278.225	652.466	663.817	281.349	744.14	389.62	208.22	752.761	408.672	224.692	768.105	307.014	211.69	731.78	205.191	-203.088	651.956	645.42	-184.621	741.771	373.483	-118.657	756.285	398.842	-127.768	766.709	298.17	-100.021	731.465	194.486
284	2.83	50.8962	1196.94	474.718	123.093	1197.65	517.086	-22.1004	1198.99	516.793	219.577	1036.68	647.248	-128.084	1038.02	673.88	30.9195	984.909	569.21	278.199	652.47	663.825	281.312	744.181	389.606	208.196	752.784	408.665	224.681	768.137	307.005	211.664	731.802	205.169	-203.109	651.978	645.436	-184.642	741.786	373.472	-118.677	756.297	398.86	-127.781	766.688	298.231	-100.028	731.47	194.482
285	2.84	50.953	1197.03	474.622	123.115	1197.72	517.023	-22.0487	1199.03	516.714	219.606	1036.72	647.249	-128.07	1038.06	673.86	30.9591	984.973	569.144	278.183	652.509	663.845	281.317	744.248	389.611	208.217	752.857	408.647	224.666	768.188	306.967	211.674	731.849	205.151	-203.124	652.031	645.501	-184.599	741.837	373.452	-118.644	756.345	398.842	-127.732	766.732	298.227	-99.9893	731.513	194.459
286	2.85	51.0328	1197.13	474.489	123.171	1197.8	516.95	-21.9717	1199.08	516.642	219.656	1036.76	647.221	-128.035	1038.1	673.857	31.0256	985.041	568.983	278.185	652.515	663.845	281.348	744.308	389.585	208.289	752.91	408.65	224.674	768.202	306.926	211.713	731.895	205.15	-203.128	652.068	645.565	-184.54	741.893	373.415	-118.572	756.412	398.745	-127.657	766.817	298.151	-99.9388	731.561	194.438
287	2.86	51.0994	1197.19	474.403	123.23	1197.83	516.958	-21.9208	1199.13	516.606	219.685	1036.77	647.195	-128.001	1038.11	673.858	31.0845	985.099	568.862	278.176	652.481	663.801	281.372	744.323	389.573	208.309	752.94	408.646	224.682	768.182	306.903	211.75	731.929	205.165	-203.109	652.064	645.594	-184.517	741.926	373.382	-118.527	756.469	398.677	-127.616	766.868	298.111	-99.9254	731.578	194.414
288	2.87	51.1078	1197.17	474.428	123.259	1197.81	517.012	-21.915	1199.13	516.621	219.691	1036.76	647.21	-127.989	1038.1	673.86	31.0994	985.06	568.906	278.171	652.471	663.819	281.388	744.303	389.587	208.321	752.918	408.661	224.686	768.151	306.911	211.765	731.925	205.182	-203.09	652.044	645.558	-184.516	741.92	373.382	-118.518	756.451	398.689	-127.625	766.875	298.126	-99.9358	731.561	194.406
289	2.88	51.0715	1197.09	474.51	123.255	1197.74	517.064	-21.9331	1199.07	516.643	219.69	1036.74	647.209	-127.977	1038.07	673.877	31.072	984.965	568.995	278.2	652.468	663.855	281.397	744.249	389.616	208.315	752.869	408.673	224.7	768.101	306.977	211.77	731.878	205.226	-203.061	652.03	645.532	-184.524	741.88	373.41	-118.528	756.387	398.749	-127.655	766.832	298.14	-99.9436	731.534	194.414
290	2.89	51.0194	1196.97	474.707	123.222	1197.66	517.064	-21.9766	1199	516.741	219.673	1036.69	647.193	-127.983	1038.02	673.88	31.0308	984.868	569.099	278.223	652.45	663.846	281.384	744.188	389.622	208.286	752.804	408.696	224.691	768.064	307.014	211.759	731.832	205.243	-203.038	652.026	645.559	-184.556	741.838	373.45	-118.558	756.314	398.787	-127.699	766.769	298.196	-99.9724	731.512	194.444
291	2.9	50.9794	1196.88	474.824	123.182	1197.6	517.077	-22.0309	1198.95	516.782	219.653	1036.65	647.191	-128	1037.99	673.834	31.0156	984.794	569.191	278.232	652.437	663.825	281.361	744.13	389.642	208.248	752.755	408.697	224.696	768.056	307.008	211.722	731.794	205.226	-203.033	652.015	645.53	-184.587	741.792	373.452	-118.592	756.255	398.842	-127.745	766.713	298.211	-100.007	731.483	194.459
292	2.91	50.9827	1196.88	474.806	123.181	1197.6	517.068	-22.0376	1198.94	516.751	219.64	1036.64	647.183	-128.005	1038	673.813	31.0062	984.801	569.189	278.211	652.418	663.789	281.36	744.118	389.659	208.223	752.756	408.7	224.683	768.074	306.978	211.708	731.785	205.207	-203.042	652.025	645.503	-184.589	741.787	373.455	-118.613	756.268	398.836	-127.764	766.697	298.206	-100.016	731.484	194.458
293	2.92	50.9791	1196.95	474.613	123.182	1197.64	516.995	-22.0053	1198.97	516.695	219.653	1036.65	647.174	-128.017	1038.04	673.785	31.015	984.882	569.08	278.188	652.424	663.796	281.347	744.166	389.636	208.222	752.815	408.646	224.679	768.124	306.951	211.707	731.826	205.177	-203.066	652.038	645.512	-184.583	741.825	373.465	-118.621	756.324	398.782	-127.74	766.722	298.196	-100.001	731.504	194.452
294	2.93	50.9921	1197.03	474.42	123.181	1197.69	516.9	-21.9807	1199	516.59	219.664	1036.69	647.151	-128.011	1038.09	673.783	31.0175	984.955	568.977	278.155	652.408	663.746	281.33	744.238	389.583	208.235	752.898	408.598	224.672	768.164	306.913	211.712	731.87	205.156	-203.09	652.059	645.547	-184.58	741.877	373.41	-118.603	756.395	398.739	-127.688	766.772	298.172	-99.9884	731.542	194.437
295	2.94	51.0415	1197.06	474.34	123.209	1197.72	516.855	-21.9533	1199.04	516.505	219.672	1036.7	647.137	-127.996	1038.12	673.79	31.0401	985.003	568.889	278.142	652.411	663.747	281.333	744.306	389.551	208.266	752.936	408.596	224.652	768.168	306.892	211.727	731.897	205.159	-203.109	652.115	645.623	-184.553	741.916	373.385	-118.573	756.442	398.688	-127.642	766.807	298.135	-99.9604	731.565	194.438
296	2.95	51.0888	1197.01	474.355	123.236	1197.69	516.877	-21.9251	1199.04	516.497	219.67	1036.71	647.121	-127.983	1038.13	673.79	31.0772	985.001	568.914	278.146	652.413	663.76	281.343	744.296	389.544	208.283	752.919	408.614	224.654	768.152	306.929	211.736	731.915	205.168	-203.108	652.122	645.604	-184.534	741.922	373.367	-118.546	756.44	398.684	-127.647	766.824	298.124	-99.9556	731.575	194.44
297	2.96	51.0995	1196.92	474.442	123.237	1197.61	516.893	-21.9248	1199.01	516.5	219.667	1036.7	647.126	-127.992	1038.11	673.809	31.0571	984.93	568.974	278.155	652.403	663.764	281.35	744.236	389.555	208.3	752.874	408.663	224.66	768.126	306.947	211.724	731.89	205.195	-203.109	652.099	645.545	-184.547	741.893	373.382	-118.55	756.41	398.718	-127.677	766.804	298.148	-99.9709	731.549	194.43
298	2.97	51.0994	1196.84	474.471	123.23	1197.53	516.907	-21.9371	1198.95	516.524	219.658	1036.65	647.143	-128	1038.06	673.824	31.0378	984.834	569.058	278.187	652.374	663.758	281.356	744.175	389.584	208.298	752.823	408.696	224.678	768.084	306.95	211.716	731.841	205.208	-203.099	652.079	645.513	-184.57	741.836	373.401	-118.567	756.354	398.758	-127.709	766.765	298.131	-99.9822	731.511	194.427
299	2.98	51.0883	1196.76	474.549	123.225	1197.48	516.916	-21.9696	1198.9	516.547	219.643	1036.62	647.161	-127.999	1038.04	673.829	31.022	984.772	569.144	278.21	652.375	663.779	281.369	744.141	389.649	208.288	752.768	408.72	224.696	768.061	306.956	211.722	731.803	205.208	-203.084	652.036	645.462	-184.575	741.793	373.438	-118.595	756.292	398.845	-127.738	766.729	298.18	-99.9923	731.49	194.477
300	2.99	51.0917	1196.74	474.601	123.233	1197.47	516.963	-21.9746	1198.88	516.554	219.627	1036.62	647.168	-128.011	1038.02	673.818	31.0235	984.735	569.16	278.206	652.375	663.792	281.368	744.126	389.685	208.265	752.747	408.732	224.702	768.059	306.995	211.725	731.788	205.253	-203.087	652.002	645.412	-184.592	741.784	373.472	-118.619	756.294	398.852	-127.761	766.712	298.203	-100.001	731.485	194.509
301	3	51.0988	1196.77	474.526	123.212	1197.5	516.926	-21.9684	1198.88	516.535	219.616	1036.65	647.172	-128.02	1038.01	673.777	31.0121	984.769	569.113	278.2	652.401	663.828	281.36	744.146	389.666	208.247	752.787	408.689	224.698	768.097	306.972	211.728	731.812	205.243	-203.094	651.979	645.39	-184.594	741.805	373.472	-118.624	756.32	398.812	-127.756	766.726	298.2	-99.9924	731.506	194.468
302	3.01	51.1064	1196.86	474.353	123.207	1197.57	516.839	-21.9515	1198.92	516.445	219.619	1036.68	647.14	-128.038	1038.04	673.745	31.0259	984.838	569.045	278.176	652.428	663.828	281.357	744.226	389.602	208.253	752.871	408.629	224.697	768.155	306.94	211.742	731.856	205.207	-203.113	651.97	645.414	-184.573	741.844	373.422	-118.597	756.364	398.741	-127.714	766.776	298.186	-99.9673	731.549	194.435
303	3.02	51.1059	1196.95	474.181	123.198	1197.65	516.762	-21.9537	1198.96	516.371	219.613	1036.72	647.113	-128.053	1038.08	673.715	31.027	984.925	568.877	278.136	652.448	663.798	281.349	744.3	389.554	208.265	752.949	408.596	224.659	768.211	306.892	211.744	731.899	205.166	-203.12	651.975	645.471	-184.562	741.886	373.393	-118.584	756.429	398.705	-127.665	766.821	298.152	-99.9601	731.578	194.428
304	3.03	51.0736	1197	474.041	123.175	1197.68	516.726	-21.9827	1198.97	516.266	219.594	1036.75	647.091	-128.066	1038.07	673.679	31.0197	984.935	568.817	278.113	652.457	663.784	281.329	744.348	389.541	208.264	752.981	408.585	224.642	768.239	306.898	211.729	731.916	205.141	-203.132	651.972	645.519	-184.565	741.9	373.371	-118.583	756.461	398.699	-127.644	766.847	298.127	-99.9652	731.578	194.413
305	3.04	51.0333	1196.91	474.094	123.137	1197.62	516.709	-22.02	1198.92	516.22	219.582	1036.75	647.088	-128.076	1038.02	673.668	31.0119	984.862	568.879	278.115	652.467	663.778	281.345	744.325	389.57	208.247	752.94	408.605	224.636	768.201	306.884	211.722	731.902	205.158	-203.137	651.956	645.506	-184.57	741.869	373.38	-118.577	756.411	398.721	-127.66	766.832	298.135	-99.9722	731.564	194.402
306	3.05	50.9789	1196.75	474.253	123.127	1197.52	516.802	-22.0546	1198.82	516.247	219.571	1036.74	647.087	-128.054	1037.95	673.673	31.007	984.716	569.017	278.135	652.518	663.802	281.369	744.239	389.612	208.258	752.845	408.641	224.689	768.114	306.964	211.723	731.86	205.179	-203.12	651.945	645.486	-184.574	741.804	373.419	-118.575	756.317	398.8	-127.693	766.778	298.176	-99.9684	731.52	194.434
307	3.06	50.9341	1196.6	474.419	123.079	1197.43	516.834	-22.0878	1198.71	516.289	219.557	1036.71	647.1	-128.059	1037.87	673.646	30.9959	984.581	569.103	278.152	652.51	663.778	281.362	744.142	389.613	208.262	752.741	408.716	224.709	768.046	307.006	211.722	731.805	205.208	-203.088	651.936	645.499	-184.575	741.75	373.433	-118.589	756.223	398.863	-127.737	766.726	298.208	-99.9888	731.471	194.429
308	3.07	50.8783	1196.54	474.465	123.029	1197.4	516.798	-22.1357	1198.66	516.278	219.563	1036.68	647.08	-128.07	1037.83	673.623	31.0047	984.507	569.195	278.192	652.513	663.8	281.341	744.088	389.611	208.259	752.683	408.741	224.704	768.005	307.005	211.705	731.765	205.218	-203.081	651.905	645.497	-184.593	741.726	373.413	-118.612	756.186	398.887	-127.781	766.7	298.206	-100.006	731.455	194.418
309	3.08	50.8104	1196.59	474.381	122.989	1197.45	516.73	-22.1742	1198.65	516.251	219.572	1036.68	647.067	-128.078	1037.84	673.615	31.0027	984.529	569.145	278.233	652.495	663.812	281.344	744.107	389.625	208.249	752.706	408.702	224.689	768.014	307.009	211.703	731.784	205.26	-203.064	651.864	645.491	-184.603	741.749	373.438	-118.615	756.222	398.871	-127.789	766.723	298.206	-100.011	731.476	194.44
310	3.09	50.781	1196.67	474.184	122.957	1197.55	516.593	-22.2027	1198.71	516.146	219.593	1036.71	647.049	-128.065	1037.89	673.635	31.0224	984.645	568.989	278.267	652.466	663.781	281.372	744.199	389.603	208.261	752.788	408.658	224.683	768.085	306.974	211.728	731.836	205.249	-203.021	651.85	645.504	-184.59	741.803	373.454	-118.598	756.306	398.823	-127.747	766.788	298.176	-99.9962	731.528	194.445
311	3.1	50.7963	1196.76	473.95	122.933	1197.63	516.438	-22.2098	1198.77	516.022	219.626	1036.74	646.989	-128.069	1037.97	673.592	31.0518	984.781	568.79	278.287	652.447	663.751	281.363	744.285	389.557	208.26	752.886	408.596	224.686	768.164	306.924	211.737	731.88	205.195	-202.982	651.872	645.553	-184.558	741.863	373.406	-118.565	756.406	398.726	-127.67	766.842	298.145	-99.969	731.571	194.421
312	3.11	50.7663	1196.82	473.784	122.91	1197.66	516.353	-22.2172	1198.8	515.939	219.628	1036.74	646.926	-128.075	1038.01	673.566	31.0283	984.849	568.679	278.295	652.448	663.773	281.345	744.331	389.528	208.259	752.942	408.564	224.671	768.211	306.882	211.742	731.904	205.17	-202.954	651.881	645.572	-184.539	741.891	373.361	-118.546	756.467	398.648	-127.644	766.865	298.102	-99.9629	731.586	194.4
313	3.12	50.7064	1196.79	473.824	122.867	1197.63	516.31	-22.2437	1198.78	515.919	219.598	1036.74	646.908	-128.095	1038.02	673.588	30.984	984.847	568.649	278.296	652.47	663.816	281.337	744.33	389.539	208.262	752.928	408.601	224.649	768.211	306.861	211.74	731.895	205.191	-202.935	651.914	645.626	-184.536	741.882	373.382	-118.561	756.448	398.704	-127.662	766.833	298.138	-99.9739	731.587	194.417
314	3.13	50.6437	1196.68	473.975	122.821	1197.54	516.308	-22.2916	1198.73	515.956	219.571	1036.72	646.88	-128.124	1038	673.599	30.9302	984.771	568.67	278.283	652.45	663.811	281.319	744.28	389.544	208.257	752.858	408.662	224.637	768.175	306.895	211.707	731.856	205.208	-202.92	651.933	645.669	-184.56	741.835	373.427	-118.582	756.394	398.767	-127.7	766.771	298.207	-99.9851	731.55	194.441
315	3.14	50.6078	1196.57	474.098	122.784	1197.43	516.338	-22.3256	1198.68	516.032	219.543	1036.69	646.851	-128.14	1037.95	673.598	30.9034	984.667	568.832	278.254	652.459	663.806	281.32	744.21	389.582	208.257	752.768	408.732	224.65	768.13	306.953	211.686	731.82	205.224	-202.908	651.927	645.678	-184.589	741.784	373.471	-118.597	756.318	398.841	-127.748	766.732	298.258	-100.005	731.507	194.471
316	3.15	50.6076	1196.47	474.154	122.799	1197.34	516.383	-22.3286	1198.64	516.054	219.526	1036.68	646.818	-128.144	1037.9	673.586	30.9071	984.575	568.993	278.247	652.487	663.799	281.329	744.158	389.624	208.271	752.706	408.771	224.685	768.083	307.009	211.703	731.799	205.258	-202.912	651.909	645.629	-184.586	741.749	373.49	-118.604	756.248	398.901	-127.779	766.719	298.259	-100.01	731.478	194.495
317	3.16	50.648	1196.42	474.15	122.839	1197.3	516.373	-22.3004	1198.61	516.013	219.541	1036.69	646.793	-128.129	1037.87	673.571	30.9528	984.507	569.044	278.252	652.507	663.804	281.369	744.145	389.645	208.293	752.705	408.76	224.738	768.039	307.023	211.735	731.787	205.271	-202.908	651.875	645.548	-184.558	741.745	373.475	-118.574	756.233	398.871	-127.764	766.735	298.213	-99.9826	731.476	194.458
318	3.17	50.7031	1196.4	474.076	122.868	1197.3	516.317	-22.2677	1198.6	515.915	219.56	1036.7	646.762	-128.1	1037.86	673.577	30.9839	984.488	568.96	278.252	652.514	663.817	281.393	744.142	389.638	208.315	752.739	408.729	224.754	768.008	306.997	211.775	731.785	205.239	-202.918	651.883	645.578	-184.53	741.758	373.423	-118.531	756.256	398.811	-127.717	766.758	298.152	-99.95	731.496	194.419
319	3.18	50.7115	1196.44	473.989	122.873	1197.35	516.262	-22.2749	1198.64	515.835	219.56	1036.72	646.755	-128.108	1037.88	673.581	30.9699	984.544	568.891	278.24	652.506	663.809	281.389	744.18	389.62	208.315	752.804	408.698	224.712	768.042	306.991	211.774	731.819	205.223	-202.94	651.898	645.638	-184.526	741.799	373.399	-118.521	756.314	398.781	-127.684	766.813	298.116	-99.9544	731.53	194.403
320	3.19	50.672	1196.55	473.91	122.828	1197.43	516.236	-22.3073	1198.68	515.797	219.526	1036.76	646.76	-128.155	1037.92	673.56	30.9162	984.659	568.761	278.239	652.492	663.804	281.358	744.267	389.606	208.266	752.904	408.646	224.648	768.144	306.958	211.731	731.883	205.212	-202.969	651.886	645.634	-184.572	741.852	373.434	-118.572	756.421	398.744	-127.72	766.87	298.155	-99.9838	731.578	194.449
321	3.2	50.6084	1196.65	473.745	122.762	1197.51	516.218	-22.3321	1198.68	515.766	219.496	1036.78	646.732	-128.196	1037.95	673.507	30.8604	984.731	568.672	278.262	652.503	663.786	281.305	744.362	389.541	208.209	752.985	408.557	224.587	768.234	306.905	211.692	731.915	205.179	-202.993	651.855	645.559	-184.625	741.889	373.409	-118.624	756.485	398.705	-127.752	766.888	298.166	-100.032	731.605	194.431
322	3.21	50.5788	1196.66	473.637	122.729	1197.53	516.168	-22.3562	1198.64	515.713	219.474	1036.77	646.693	-128.216	1037.95	673.462	30.859	984.728	568.657	278.276	652.519	663.787	281.265	744.385	389.494	208.181	753	408.497	224.571	768.257	306.865	211.673	731.907	205.121	-203.023	651.816	645.471	-184.651	741.884	373.389	-118.653	756.493	398.7	-127.734	766.844	298.169	-100.044	731.592	194.41
323	3.22	50.6046	1196.53	473.739	122.731	1197.47	516.165	-22.389	1198.59	515.718	219.454	1036.73	646.71	-128.222	1037.93	673.468	30.855	984.672	568.674	278.274	652.509	663.791	281.256	744.336	389.512	208.194	752.967	408.54	224.587	768.239	306.835	211.666	731.873	205.105	-203.037	651.808	645.48	-184.634	741.839	373.4	-118.674	756.431	398.725	-127.735	766.789	298.149	-100.039	731.545	194.418
324	3.23	50.6117	1196.41	473.846	122.723	1197.39	516.219	-22.3988	1198.53	515.753	219.449	1036.68	646.749	-128.219	1037.87	673.473	30.8605	984.565	568.778	278.279	652.517	663.809	281.264	744.264	389.53	208.206	752.887	408.625	224.606	768.185	306.836	211.65	731.839	205.118	-203.032	651.825	645.547	-184.628	741.784	373.441	-118.685	756.337	398.774	-127.774	766.733	298.164	-100.037	731.5	194.444
325	3.24	50.592	1196.31	474.03	122.694	1197.3	516.258	-22.422	1198.47	515.789	219.451	1036.68	646.788	-128.211	1037.8	673.505	30.8576	984.456	568.894	278.3	652.533	663.824	281.299	744.193	389.569	208.201	752.815	408.658	224.623	768.121	306.897	211.657	731.81	205.178	-203.031	651.83	645.573	-184.63	741.754	373.465	-118.682	756.281	398.818	-127.826	766.705	298.206	-100.042	731.482	194.447
326	3.25	50.5946	1196.25	474.153	122.688	1197.26	516.312	-22.4146	1198.43	515.85	219.462	1036.69	646.823	-128.197	1037.77	673.547	30.8844	984.371	569.057	278.313	652.526	663.813	281.342	744.16	389.622	208.259	752.746	408.738	224.667	768.047	307.009	211.689	731.795	205.244	-203.009	651.81	645.548	-184.618	741.735	373.49	-118.656	756.234	398.896	-127.837	766.74	298.202	-100.023	731.473	194.47
327	3.26	50.6086	1196.27	474.177	122.729	1197.26	516.363	-22.3906	1198.43	515.872	219.479	1036.71	646.829	-128.179	1037.77	673.562	30.9296	984.352	569.146	278.315	652.531	663.798	281.404	744.182	389.682	208.343	752.728	408.828	224.725	768.021	307.094	211.747	731.791	205.316	-202.978	651.79	645.505	-184.586	741.755	373.492	-118.601	756.255	398.891	-127.804	766.814	298.177	-99.981	731.479	194.482
328	3.27	50.6392	1196.35	474.031	122.779	1197.32	516.317	-22.3632	1198.49	515.811	219.506	1036.75	646.811	-128.164	1037.8	673.557	30.9575	984.453	568.953	278.317	652.54	663.796	281.423	744.228	389.639	208.37	752.789	408.764	224.744	768.037	307.052	211.779	731.827	205.295	-202.953	651.806	645.549	-184.526	741.803	373.432	-118.544	756.326	398.789	-127.727	766.856	298.142	-99.9485	731.522	194.441
329	3.28	50.6195	1196.46	473.819	122.775	1197.43	516.209	-22.3692	1198.58	515.751	219.512	1036.8	646.804	-128.183	1037.87	673.567	30.9338	984.601	568.702	278.315	652.534	663.809	281.39	744.285	389.571	208.331	752.891	408.654	224.704	768.115	306.92	211.768	731.869	205.226	-202.936	651.801	645.59	-184.499	741.854	373.393	-118.529	756.399	398.724	-127.666	766.871	298.118	-99.928	731.567	194.385
330	3.29	50.5377	1196.58	473.761	122.698	1197.51	516.183	-22.4305	1198.63	515.76	219.474	1036.82	646.826	-128.226	1037.91	673.606	30.8771	984.693	568.651	278.313	652.539	663.838	281.334	744.344	389.572	208.278	752.958	408.617	224.648	768.193	306.867	211.732	731.878	205.214	-202.919	651.775	645.596	-184.542	741.887	373.408	-118.576	756.451	398.718	-127.666	766.859	298.143	-99.9561	731.595	194.384
331	3.3	50.4333	1196.64	473.78	122.593	1197.57	516.19	-22.5018	1198.65	515.809	219.43	1036.82	646.85	-128.273	1037.91	673.629	30.7987	984.75	568.638	278.327	652.57	663.849	281.289	744.398	389.584	208.226	752.987	408.602	224.599	768.25	306.881	211.694	731.89	205.19	-202.901	651.752	645.565	-184.605	741.899	373.454	-118.636	756.479	398.73	-127.72	766.844	298.229	-100.012	731.598	194.426
332	3.31	50.3867	1196.64	473.874	122.513	1197.56	516.182	-22.5559	1198.64	515.893	219.403	1036.79	646.841	-128.287	1037.89	673.635	30.7548	984.736	568.661	278.334	652.56	663.801	281.268	744.397	389.574	208.188	752.955	408.607	224.579	768.266	306.889	211.668	731.88	205.147	-202.874	651.745	645.565	-184.639	741.871	373.473	-118.679	756.435	398.77	-127.783	766.798	298.263	-100.041	731.577	194.469
333	3.32	50.3657	1196.56	474.061	122.511	1197.48	516.261	-22.5814	1198.59	515.974	219.402	1036.75	646.829	-128.285	1037.83	673.651	30.7748	984.613	568.828	278.304	652.543	663.775	281.282	744.306	389.581	208.18	752.88	408.627	224.605	768.194	306.926	211.658	731.846	205.143	-202.857	651.764	645.616	-184.625	741.795	373.472	-118.68	756.346	398.848	-127.79	766.742	298.287	-100.039	731.537	194.486
334	3.33	50.3972	1196.45	474.234	122.558	1197.38	516.367	-22.5689	1198.53	516.011	219.425	1036.72	646.84	-128.26	1037.75	673.688	30.8203	984.474	568.999	278.275	652.556	663.806	281.318	744.208	389.621	208.239	752.806	408.716	224.685	768.089	306.984	211.685	731.812	205.188	-202.863	651.756	645.656	-184.593	741.745	373.482	-118.631	756.262	398.871	-127.788	766.728	298.268	-100.015	731.499	194.485
335	3.34	50.4371	1196.37	474.319	122.597	1197.34	516.419	-22.5556	1198.5	516.022	219.441	1036.7	646.832	-128.228	1037.69	673.699	30.8626	984.372	569.125	278.263	652.553	663.833	281.363	744.152	389.676	208.291	752.73	408.767	224.736	767.995	307.058	211.734	731.783	205.241	-202.871	651.742	645.663	-184.57	741.721	373.463	-118.587	756.21	398.877	-127.793	766.77	298.188	-99.9826	731.47	194.463
336	3.35	50.427	1196.39	474.338	122.604	1197.36	516.435	-22.5628	1198.51	516.033	219.452	1036.72	646.84	-128.205	1037.69	673.733	30.8802	984.333	569.139	278.27	652.554	663.812	281.391	744.16	389.687	208.332	752.711	408.772	224.725	767.952	307.075	211.76	731.796	205.254	-202.856	651.733	645.681	-184.555	741.737	373.468	-118.561	756.221	398.853	-127.772	766.812	298.156	-99.9683	731.485	194.446
337	3.36	50.3773	1196.47	474.348	122.568	1197.43	516.427	-22.5867	1198.56	516.044	219.449	1036.77	646.851	-128.206	1037.72	673.757	30.8491	984.408	569.094	278.283	652.578	663.816	281.374	744.216	389.646	208.303	752.772	408.726	224.703	767.987	307.076	211.749	731.835	205.243	-202.839	651.742	645.666	-184.561	741.773	373.494	-118.566	756.283	398.852	-127.764	766.851	298.159	-99.9826	731.531	194.465
338	3.37	50.3265	1196.58	474.217	122.509	1197.54	516.383	-22.621	1198.61	516.053	219.433	1036.81	646.84	-128.23	1037.76	673.747	30.8034	984.524	568.933	278.303	652.595	663.835	281.341	744.29	389.6	208.245	752.847	408.663	224.651	768.069	307.018	211.722	731.885	205.205	-202.821	651.733	645.629	-184.582	741.805	373.492	-118.599	756.351	398.813	-127.756	766.853	298.172	-99.995	731.564	194.466
339	3.38	50.2594	1196.7	473.994	122.445	1197.65	516.306	-22.6581	1198.64	516.037	219.403	1036.82	646.796	-128.268	1037.79	673.72	30.7644	984.624	568.726	278.31	652.588	663.852	281.278	744.352	389.503	208.187	752.922	408.57	224.581	768.189	306.878	211.683	731.892	205.131	-202.811	651.717	645.632	-184.599	741.824	373.428	-118.64	756.404	398.748	-127.746	766.831	298.137	-100.012	731.579	194.406
340	3.39	50.1946	1196.81	473.833	122.386	1197.74	516.267	-22.6772	1198.66	516.023	219.376	1036.81	646.778	-128.307	1037.79	673.707	30.7293	984.713	568.626	278.31	652.592	663.871	281.223	744.389	389.462	208.14	752.967	408.523	224.547	768.272	306.793	211.66	731.868	205.105	-202.815	651.7	645.67	-184.626	741.838	373.416	-118.683	756.437	398.741	-127.755	766.792	298.161	-100.032	731.583	194.402
341	3.4	50.1646	1196.85	473.824	122.354	1197.75	516.29	-22.7091	1198.67	516.064	219.362	1036.81	646.814	-128.319	1037.79	673.743	30.7113	984.739	568.687	278.324	652.558	663.839	281.219	744.394	389.504	208.142	752.954	408.553	224.551	768.293	306.819	211.646	731.841	205.131	-202.816	651.693	645.698	-184.65	741.85	373.456	-118.706	756.441	398.775	-127.771	766.767	298.23	-100.051	731.576	194.456
342	3.41	50.1781	1196.8	473.967	122.358	1197.72	516.317	-22.7258	1198.65	516.111	219.366	1036.8	646.854	-128.307	1037.78	673.756	30.7286	984.686	568.813	278.355	652.582	663.86	281.258	744.359	389.56	208.177	752.925	408.599	224.577	768.268	306.862	211.654	731.847	205.168	-202.8	651.676	645.666	-184.639	741.83	373.482	-118.702	756.405	398.817	-127.774	766.771	298.251	-100.053	731.565	194.469
343	3.42	50.2202	1196.7	474.128	122.42	1197.63	516.375	-22.7001	1198.63	516.102	219.395	1036.8	646.872	-128.26	1037.73	673.76	30.7891	984.574	568.983	278.373	652.622	663.849	281.326	744.298	389.593	208.248	752.857	408.664	224.648	768.179	306.934	211.694	731.86	205.198	-202.792	651.66	645.599	-184.589	741.803	373.476	-118.635	756.33	398.837	-127.76	766.778	298.248	-100.016	731.546	194.442
344	3.43	50.2906	1196.57	474.296	122.513	1197.52	516.466	-22.6464	1198.6	516.115	219.431	1036.79	646.884	-128.194	1037.69	673.806	30.869	984.425	569.115	278.356	652.615	663.836	281.411	744.235	389.675	208.331	752.747	408.749	224.748	768.052	307.049	211.755	731.83	205.266	-202.799	651.691	645.619	-184.542	741.772	373.458	-118.551	756.257	398.829	-127.724	766.789	298.213	-99.9691	731.516	194.451
345	3.44	50.3285	1196.49	474.383	122.562	1197.45	516.51	-22.6169	1198.55	516.111	219.436	1036.78	646.894	-128.176	1037.66	673.81	30.9208	984.314	569.264	278.322	652.593	663.817	281.453	744.197	389.719	208.392	752.686	408.809	224.806	767.972	307.114	211.792	731.792	205.302	-202.832	651.733	645.734	-184.511	741.751	373.468	-118.512	756.23	398.838	-127.715	766.825	298.145	-99.9382	731.481	194.441
346	3.45	50.3342	1196.47	474.402	122.543	1197.45	516.478	-22.6251	1198.54	516.089	219.416	1036.78	646.908	-128.199	1037.64	673.784	30.9095	984.322	569.269	278.308	652.567	663.804	281.434	744.194	389.703	208.379	752.699	408.786	224.795	767.965	307.121	211.792	731.775	205.334	-202.856	651.735	645.75	-184.517	741.758	373.484	-118.519	756.241	398.849	-127.735	766.838	298.156	-99.9539	731.498	194.437
347	3.46	50.2806	1196.54	474.306	122.488	1197.5	516.445	-22.6686	1198.58	516.093	219.382	1036.79	646.885	-128.251	1037.68	673.75	30.8435	984.43	569.154	278.31	652.571	663.802	281.373	744.229	389.651	208.286	752.774	408.68	224.711	768.027	307.054	211.742	731.807	205.29	-202.846	651.726	645.704	-184.568	741.781	373.461	-118.571	756.301	398.838	-127.773	766.838	298.186	-100.001	731.53	194.465
348	3.47	50.2094	1196.67	474.109	122.396	1197.62	516.358	-22.7141	1198.61	516.088	219.34	1036.82	646.837	-128.304	1037.76	673.726	30.746	984.59	568.888	278.321	652.588	663.79	281.296	744.312	389.578	208.185	752.867	408.593	224.623	768.157	306.931	211.677	731.849	205.207	-202.821	651.722	645.646	-184.621	741.821	373.449	-118.65	756.389	398.783	-127.803	766.808	298.226	-100.039	731.564	194.478
349	3.48	50.1518	1196.76	473.948	122.322	1197.7	516.271	-22.7438	1198.62	516.053	219.318	1036.83	646.793	-128.332	1037.8	673.702	30.6682	984.702	568.679	278.319	652.612	663.792	281.223	744.377	389.486	208.139	752.922	408.539	224.567	768.261	306.84	211.642	731.85	205.148	-202.829	651.714	645.634	-184.66	741.85	373.427	-118.718	756.431	398.763	-127.82	766.786	298.227	-100.062	731.585	194.447
350	3.49	50.1441	1196.79	473.85	122.302	1197.7	516.238	-22.7444	1198.62	516.032	219.309	1036.81	646.774	-128.349	1037.81	673.69	30.6598	984.747	568.608	278.306	652.604	663.826	281.207	744.4	389.465	208.111	752.935	408.488	224.55	768.29	306.868	211.637	731.847	205.123	-202.853	651.686	645.591	-184.674	741.843	373.439	-118.737	756.441	398.719	-127.82	766.772	298.215	-100.069	731.573	194.444
351	3.5	50.1882	1196.75	473.901	122.345	1197.68	516.274	-22.7288	1198.63	516.03	219.322	1036.81	646.793	-128.335	1037.79	673.699	30.6926	984.717	568.674	278.293	652.588	663.866	281.236	744.372	389.527	208.143	752.936	408.528	224.568	768.252	306.897	211.651	731.847	205.157	-202.872	651.673	645.613	-184.647	741.833	373.476	-118.701	756.42	398.749	-127.788	766.786	298.22	-100.052	731.566	194.447
352	3.51	50.2643	1196.67	474.034	122.426	1197.63	516.329	-22.6868	1198.61	515.996	219.354	1036.82	646.83	-128.293	1037.76	673.714	30.7584	984.627	568.813	278.271	652.597	663.904	281.299	744.33	389.605	208.218	752.901	408.611	224.61	768.157	306.957	211.691	731.859	205.195	-202.886	651.674	645.626	-184.602	741.823	373.498	-118.642	756.375	398.814	-127.754	766.815	298.206	-100.026	731.55	194.47
353	3.52	50.3337	1196.56	474.129	122.507	1197.55	516.369	-22.6369	1198.57	515.958	219.392	1036.82	646.83	-128.24	1037.72	673.698	30.8262	984.521	568.923	278.248	652.613	663.885	281.361	744.274	389.629	208.296	752.819	408.692	224.68	768.055	307.01	211.741	731.858	205.226	-202.896	651.704	645.633	-184.561	741.802	373.469	-118.584	756.317	398.812	-127.735	766.844	298.147	-99.984	731.54	194.471
354	3.53	50.3566	1196.47	474.202	122.547	1197.47	516.385	-22.6185	1198.53	515.945	219.405	1036.8	646.804	-128.216	1037.69	673.684	30.8805	984.396	569.057	278.241	652.632	663.871	281.391	744.234	389.634	208.328	752.762	408.712	224.738	767.994	307.019	211.778	731.827	205.236	-202.919	651.74	645.645	-184.541	741.772	373.45	-118.556	756.268	398.789	-127.726	766.84	298.112	-99.9553	731.515	194.426
355	3.54	50.3319	1196.45	474.2	122.529	1197.42	516.392	-22.6263	1198.5	515.966	219.385	1036.78	646.783	-128.235	1037.67	673.672	30.8732	984.345	569.127	278.23	652.619	663.836	281.369	744.2	389.615	208.296	752.718	408.706	224.737	767.987	307.001	211.758	731.795	205.219	-202.93	651.748	645.647	-184.554	741.736	373.437	-118.592	756.243	398.819	-127.748	766.794	298.14	-99.9707	731.489	194.409
356	3.55	50.2841	1196.45	474.191	122.472	1197.43	516.374	-22.6641	1198.5	515.967	219.351	1036.77	646.801	-128.276	1037.66	673.658	30.8159	984.368	569.089	278.241	652.615	663.858	281.32	744.181	389.595	208.234	752.723	408.676	224.684	768.029	306.978	211.708	731.77	205.208	-202.936	651.732	645.649	-184.597	741.726	373.453	-118.643	756.247	398.881	-127.818	766.754	298.2	-100.001	731.477	194.443
357	3.56	50.2366	1196.51	474.134	122.398	1197.49	516.343	-22.7173	1198.52	515.972	219.319	1036.79	646.79	-128.305	1037.68	673.65	30.7393	984.464	568.943	278.239	652.592	663.836	281.279	744.216	389.593	208.164	752.786	408.61	224.626	768.112	306.929	211.667	731.781	205.213	-202.943	651.714	645.646	-184.65	741.747	373.481	-118.688	756.297	398.891	-127.856	766.753	298.259	-100.043	731.492	194.448
358	3.57	50.1993	1196.59	474.023	122.349	1197.56	516.274	-22.7441	1198.55	515.951	219.311	1036.82	646.777	-128.314	1037.73	673.628	30.7134	984.574	568.857	278.261	652.585	663.814	281.262	744.305	389.578	208.132	752.875	408.583	224.593	768.183	306.924	211.671	731.817	205.218	-202.917	651.691	645.596	-184.662	741.782	373.48	-118.708	756.366	398.86	-127.837	766.773	298.277	-100.067	731.53	194.436
359	3.58	50.2152	1196.65	473.885	122.367	1197.63	516.2	-22.7169	1198.58	515.901	219.333	1036.85	646.757	-128.298	1037.78	673.603	30.7388	984.682	568.683	278.301	652.607	663.836	281.279	744.364	389.54	208.153	752.931	408.566	224.599	768.229	306.898	211.696	731.852	205.202	-202.886	651.663	645.514	-184.631	741.827	373.457	-118.673	756.423	398.777	-127.782	766.799	298.2	-100.032	731.562	194.405
360	3.59	50.2661	1196.68	473.738	122.427	1197.67	516.132	-22.6621	1198.6	515.795	219.371	1036.85	646.701	-128.269	1037.81	673.581	30.7783	984.73	568.58	278.324	652.622	663.849	281.326	744.384	389.531	208.199	752.958	408.556	224.616	768.233	306.858	211.721	731.876	205.192	-202.874	651.636	645.489	-184.59	741.855	373.397	-118.628	756.467	398.708	-127.707	766.834	298.116	-99.9928	731.581	194.377
361	3.6	50.3056	1196.66	473.733	122.475	1197.65	516.143	-22.6364	1198.6	515.746	219.396	1036.86	646.708	-128.252	1037.8	673.558	30.8201	984.728	568.55	278.332	652.615	663.846	281.35	744.365	389.547	208.249	752.958	408.573	224.635	768.211	306.868	211.743	731.88	205.194	-202.889	651.624	645.499	-184.57	741.852	373.375	-118.59	756.473	398.673	-127.674	766.857	298.091	-99.9848	731.586	194.405
362	3.61	50.3107	1196.58	473.868	122.481	1197.57	516.198	-22.664	1198.56	515.799	219.403	1036.85	646.76	-128.243	1037.77	673.6	30.8378	984.664	568.647	278.324	652.618	663.857	281.343	744.334	389.566	208.275	752.915	408.633	224.671	768.153	306.93	211.734	731.879	205.21	-202.901	651.67	645.603	-184.592	741.83	373.431	-118.597	756.426	398.759	-127.699	766.849	298.163	-99.9795	731.562	194.446
363	3.62	50.2956	1196.48	473.96	122.459	1197.47	516.263	-22.7025	1198.5	515.872	219.379	1036.82	646.757	-128.255	1037.73	673.615	30.8213	984.576	568.772	278.317	652.63	663.852	281.332	744.286	389.587	208.253	752.847	408.656	224.674	768.096	306.976	211.702	731.867	205.196	-202.908	651.717	645.654	-184.61	741.784	373.474	-118.608	756.351	398.818	-127.756	766.816	298.204	-100.001	731.537	194.454
364	3.63	50.2514	1196.4	474.048	122.438	1197.38	516.27	-22.7147	1198.44	515.888	219.359	1036.79	646.728	-128.268	1037.69	673.578	30.8007	984.477	568.915	278.318	652.641	663.836	281.312	744.223	389.564	208.222	752.763	408.645	224.655	768.06	306.983	211.681	731.837	205.168	-202.911	651.741	645.652	-184.618	741.728	373.505	-118.639	756.276	398.854	-127.803	766.769	298.197	-100.023	731.508	194.457
365	3.64	50.2319	1196.31	474.16	122.43	1197.33	516.289	-22.7259	1198.4	515.921	219.357	1036.76	646.725	-128.262	1037.67	673.578	30.7736	984.374	569.017	278.314	652.631	663.818	281.304	744.172	389.569	208.211	752.706	408.678	224.668	768.026	306.993	211.669	731.795	205.196	-202.9	651.741	645.632	-184.628	741.696	373.504	-118.648	756.229	398.858	-127.84	766.726	298.203	-100.028	731.482	194.446
366	3.65	50.2371	1196.29	474.164	122.428	1197.34	516.275	-22.7325	1198.41	515.926	219.355	1036.75	646.739	-128.251	1037.65	673.599	30.7825	984.346	569.055	278.329	652.611	663.816	281.313	744.158	389.589	208.207	752.701	408.699	224.671	768.02	306.989	211.671	731.771	205.214	-202.883	651.738	645.644	-184.623	741.698	373.507	-118.652	756.233	398.87	-127.845	766.726	298.183	-100.027	731.485	194.462
367	3.66	50.2575	1196.35	474.055	122.454	1197.38	516.249	-22.7067	1198.45	515.884	219.372	1036.77	646.726	-128.23	1037.67	673.604	30.7982	984.425	568.923	278.353	652.615	663.862	281.343	744.19	389.62	208.236	752.769	408.708	224.656	768.067	306.979	211.689	731.799	205.247	-202.866	651.712	645.637	-184.609	741.748	373.491	-118.634	756.286	398.837	-127.816	766.776	298.176	-100.012	731.509	194.433
368	3.67	50.2866	1196.44	473.93	122.475	1197.46	516.191	-22.6744	1198.5	515.799	219.4	1036.8	646.705	-128.218	1037.72	673.604	30.7993	984.554	568.785	278.341	652.58	663.835	281.372	744.26	389.635	208.253	752.85	408.669	224.641	768.115	306.954	211.716	731.849	205.269	-202.85	651.674	645.574	-184.597	741.803	373.452	-118.613	756.371	398.783	-127.776	766.843	298.161	-100.004	731.541	194.426
369	3.68	50.305	1196.51	473.814	122.489	1197.54	516.127	-22.6558	1198.52	515.759	219.417	1036.84	646.687	-128.215	1037.76	673.601	30.8041	984.656	568.656	278.337	652.568	663.79	281.372	744.329	389.619	208.239	752.917	408.602	224.626	768.17	306.922	211.724	731.897	205.228	-202.834	651.658	645.511	-184.584	741.847	373.439	-118.612	756.442	398.753	-127.738	766.876	298.136	-100.003	731.579	194.419
370	3.69	50.3026	1196.54	473.684	122.479	1197.57	516.038	-22.651	1198.53	515.741	219.417	1036.85	646.644	-128.218	1037.8	673.578	30.8124	984.712	568.569	278.332	652.594	663.806	281.337	744.384	389.541	208.198	752.97	408.505	224.611	768.208	306.89	211.721	731.901	205.163	-202.848	651.659	645.501	-184.583	741.872	373.39	-118.621	756.46	398.72	-127.721	766.865	298.111	-99.9961	731.595	194.388
371	3.7	50.2854	1196.54	473.64	122.447	1197.56	516.015	-22.6616	1198.52	515.73	219.397	1036.83	646.615	-128.231	1037.79	673.56	30.7872	984.713	568.548	278.311	652.6	663.814	281.296	744.393	389.484	208.205	752.963	408.508	224.594	768.213	306.85	211.705	731.875	205.126	-202.878	651.679	645.562	-184.595	741.843	373.379	-118.633	756.443	398.696	-127.73	766.823	298.108	-100.01	731.572	194.382
372	3.71	50.2666	1196.47	473.813	122.428	1197.5	516.083	-22.6818	1198.48	515.791	219.373	1036.81	646.647	-128.25	1037.76	673.581	30.7612	984.638	568.667	278.267	652.596	663.799	281.254	744.338	389.489	208.197	752.914	408.57	224.586	768.212	306.852	211.671	731.845	205.139	-202.902	651.712	645.644	-184.638	741.801	373.425	-118.67	756.384	398.768	-127.774	766.775	298.18	-100.036	731.538	194.4
373	3.72	50.2717	1196.37	473.972	122.433	1197.41	516.181	-22.7109	1198.43	515.86	219.359	1036.78	646.677	-128.265	1037.73	673.575	30.7485	984.523	568.828	278.239	652.59	663.789	281.245	744.261	389.551	208.195	752.84	408.625	224.611	768.161	306.897	211.65	731.834	205.165	-202.908	651.744	645.693	-184.649	741.756	373.453	-118.699	756.314	398.868	-127.826	766.745	298.241	-100.052	731.501	194.43
374	3.73	50.3149	1196.28	474.106	122.471	1197.35	516.235	-22.7007	1198.4	515.875	219.381	1036.77	646.707	-128.226	1037.7	673.58	30.7908	984.434	568.966	278.243	652.584	663.766	281.288	744.219	389.602	208.227	752.759	408.7	224.669	768.069	307.008	211.666	731.83	205.196	-202.886	651.773	645.729	-184.636	741.723	373.514	-118.669	756.258	398.883	-127.831	766.743	298.249	-100.043	731.485	194.474
375	3.74	50.3765	1196.25	474.117	122.525	1197.32	516.241	-22.6459	1198.4	515.827	219.412	1036.77	646.722	-128.183	1037.66	673.591	30.8608	984.379	569.066	278.272	652.587	663.809	281.348	744.203	389.631	208.29	752.739	408.775	224.702	768.022	307.024	211.712	731.815	205.253	-202.867	651.755	645.696	-184.599	741.719	373.533	-118.621	756.245	398.88	-127.811	766.775	298.213	-100.006	731.49	194.451
376	3.75	50.4162	1196.28	474.026	122.578	1197.34	516.224	-22.5788	1198.41	515.759	219.455	1036.78	646.717	-128.138	1037.67	673.599	30.9114	984.433	568.975	278.311	652.566	663.828	281.399	744.208	389.642	208.324	752.768	408.75	224.728	768.018	307.014	211.753	731.826	205.286	-202.845	651.719	645.626	-184.557	741.731	373.498	-118.579	756.281	398.841	-127.768	766.799	298.178	-99.9786	731.513	194.41
377	3.76	50.4513	1196.34	473.943	122.622	1197.39	516.202	-22.5532	1198.46	515.72	219.489	1036.81	646.714	-128.113	1037.7	673.589	30.9329	984.517	568.833	278.357	652.547	663.833	281.423	744.24	389.66	208.325	752.814	408.7	224.73	768.059	306.981	211.787	731.841	205.298	-202.83	651.673	645.584	-184.524	741.777	373.449	-118.544	756.349	398.792	-127.721	766.832	298.154	-99.962	731.549	194.435
378	3.77	50.4329	1196.43	473.819	122.593	1197.45	516.155	-22.563	1198.48	515.707	219.489	1036.82	646.715	-128.129	1037.73	673.559	30.9124	984.604	568.721	278.38	652.551	663.845	281.413	744.265	389.666	208.3	752.867	408.664	224.689	768.11	306.933	211.778	731.857	205.285	-202.825	651.675	645.597	-184.53	741.823	373.412	-118.551	756.405	398.755	-127.712	766.846	298.15	-99.9602	731.561	194.437
379	3.78	50.3781	1196.46	473.72	122.523	1197.47	516.108	-22.5953	1198.47	515.705	219.445	1036.81	646.691	-128.179	1037.74	673.543	30.8408	984.653	568.652	278.362	652.561	663.841	281.35	744.292	389.598	208.226	752.897	408.581	224.634	768.143	306.895	211.733	731.861	205.22	-202.844	651.684	645.622	-184.589	741.83	373.414	-118.63	756.418	398.741	-127.753	766.811	298.191	-99.9941	731.557	194.422
380	3.79	50.3337	1196.43	473.74	122.481	1197.45	516.096	-22.647	1198.44	515.697	219.405	1036.79	646.673	-128.211	1037.73	673.517	30.7891	984.639	568.644	278.324	652.572	663.808	281.288	744.298	389.538	208.184	752.871	408.601	224.605	768.159	306.885	211.683	731.841	205.165	-202.864	651.687	645.606	-184.634	741.802	373.419	-118.675	756.373	398.748	-127.803	766.776	298.169	-100.039	731.549	194.412
381	3.8	50.3127	1196.4	473.743	122.455	1197.42	516.075	-22.6813	1198.42	515.686	219.392	1036.77	646.648	-128.214	1037.71	673.509	30.78	984.605	568.683	278.287	652.559	663.768	281.264	744.278	389.511	208.166	752.837	408.607	224.601	768.166	306.928	211.649	731.832	205.126	-202.877	651.699	645.631	-184.644	741.772	373.443	-118.696	756.329	398.788	-127.817	766.737	298.176	-100.067	731.523	194.421
382	3.81	50.3181	1196.34	473.758	122.468	1197.38	516.074	-22.6864	1198.4	515.689	219.388	1036.77	646.634	-128.21	1037.71	673.483	30.7926	984.572	568.683	278.275	652.551	663.758	281.256	744.264	389.509	208.163	752.821	408.588	224.609	768.129	306.937	211.631	731.839	205.128	-202.899	651.73	645.69	-184.647	741.753	373.434	-118.711	756.322	398.819	-127.819	766.74	298.194	-100.062	731.508	194.429
383	3.82	50.3449	1196.32	473.783	122.522	1197.35	516.106	-22.6528	1198.4	515.681	219.411	1036.77	646.632	-128.189	1037.71	673.508	30.8241	984.532	568.699	278.243	652.535	663.748	281.281	744.263	389.557	208.208	752.821	408.633	224.634	768.093	306.973	211.644	731.852	205.162	-202.906	651.739	645.73	-184.624	741.773	373.41	-118.673	756.329	398.815	-127.814	766.783	298.199	-100.04	731.524	194.409
384	3.83	50.3906	1196.3	473.804	122.581	1197.33	516.116	-22.5991	1198.4	515.639	219.454	1036.77	646.643	-128.151	1037.72	673.53	30.8902	984.489	568.737	278.251	652.532	663.753	281.344	744.253	389.605	208.257	752.82	408.672	224.673	768.08	306.976	211.707	731.86	205.193	-202.868	651.718	645.678	-184.584	741.792	373.418	-118.608	756.324	398.824	-127.775	766.817	298.176	-99.9984	731.551	194.42
385	3.84	50.4296	1196.28	473.776	122.631	1197.31	516.096	-22.5642	1198.39	515.617	219.495	1036.76	646.636	-128.124	1037.72	673.507	30.9262	984.465	568.764	278.294	652.53	663.764	281.404	744.23	389.625	208.281	752.817	408.645	224.711	768.061	306.99	211.753	731.853	205.214	-202.82	651.686	645.593	-184.548	741.779	373.416	-118.569	756.319	398.801	-127.745	766.841	298.126	-99.9733	731.549	194.397
386	3.85	50.446	1196.24	473.753	122.63	1197.28	516.074	-22.5793	1198.35	515.62	219.499	1036.75	646.612	-128.11	1037.71	673.495	30.9178	984.442	568.768	278.321	652.526	663.783	281.412	744.204	389.625	208.261	752.806	408.575	224.716	768.054	306.983	211.753	731.842	205.223	-202.784	651.64	645.516	-184.549	741.759	373.4	-118.576	756.311	398.786	-127.737	766.83	298.122	-99.9731	731.529	194.389
387	3.86	50.4156	1196.2	473.771	122.584	1197.26	516.056	-22.6123	1198.32	515.656	219.475	1036.72	646.619	-128.108	1037.7	673.499	30.892	984.416	568.78	278.335	652.54	663.831	281.398	744.18	389.658	208.245	752.794	408.605	224.694	768.058	306.992	211.751	731.823	205.256	-202.785	651.633	645.517	-184.573	741.747	373.456	-118.595	756.301	398.824	-127.759	766.783	298.173	-99.9931	731.51	194.447
388	3.87	50.3762	1196.19	473.775	122.525	1197.25	516.014	-22.6346	1198.3	515.631	219.445	1036.73	646.61	-128.131	1037.7	673.492	30.8657	984.418	568.811	278.339	652.566	663.875	281.357	744.191	389.656	208.228	752.806	408.646	224.671	768.095	306.981	211.726	731.826	205.24	-202.807	651.649	645.562	-184.609	741.75	373.476	-118.634	756.31	398.867	-127.783	766.748	298.231	-100.015	731.508	194.452
389	3.88	50.3507	1196.19	473.726	122.487	1197.27	515.925	-22.6557	1198.3	515.597	219.418	1036.73	646.568	-128.161	1037.75	673.465	30.8279	984.486	568.678	278.325	652.572	663.863	281.291	744.234	389.586	208.175	752.847	408.574	224.637	768.149	306.939	211.69	731.831	205.176	-202.83	651.684	645.624	-184.641	741.754	373.435	-118.674	756.332	398.843	-127.801	766.748	298.254	-100.045	731.513	194.427
390	3.89	50.3599	1196.19	473.612	122.501	1197.29	515.848	-22.6374	1198.31	515.556	219.421	1036.74	646.536	-128.167	1037.77	673.429	30.8215	984.518	568.595	278.29	652.559	663.817	281.264	744.274	389.531	208.169	752.88	408.543	224.61	768.18	306.881	211.689	731.845	205.141	-202.864	651.714	645.65	-184.637	741.76	373.43	-118.681	756.344	398.821	-127.802	766.777	298.194	-100.044	731.524	194.395
391	3.9	50.3961	1196.2	473.543	122.559	1197.28	515.834	-22.5976	1198.32	515.489	219.438	1036.76	646.522	-128.153	1037.78	673.424	30.8379	984.531	568.579	278.269	652.571	663.8	281.294	744.306	389.529	208.21	752.893	408.558	224.629	768.166	306.889	211.702	731.881	205.149	-202.884	651.724	645.651	-184.607	741.778	373.456	-118.639	756.363	398.756	-127.77	766.805	298.136	-100.019	731.542	194.416
392	3.91	50.4326	1196.19	473.496	122.6	1197.24	515.847	-22.5786	1198.31	515.442	219.441	1036.77	646.499	-128.139	1037.77	673.406	30.8596	984.535	568.553	278.265	652.56	663.781	281.322	744.315	389.543	208.24	752.875	408.596	224.632	768.144	306.918	211.706	731.901	205.175	-202.895	651.757	645.679	-184.591	741.798	373.448	-118.614	756.393	398.721	-127.753	766.833	298.144	-100.003	731.553	194.431
393	3.92	50.4518	1196.17	473.488	122.625	1197.21	515.867	-22.5712	1198.29	515.416	219.44	1036.77	646.514	-128.143	1037.76	673.39	30.877	984.506	568.601	278.264	652.543	663.794	281.346	744.291	389.581	208.276	752.846	408.651	224.66	768.1	306.964	211.726	731.889	205.218	-202.902	651.755	645.67	-184.585	741.806	373.431	-118.61	756.4	398.734	-127.746	766.847	298.151	-100.001	731.552	194.429
394	3.93	50.4729	1196.12	473.54	122.647	1197.17	515.898	-22.5586	1198.27	515.425	219.442	1036.75	646.533	-128.141	1037.73	673.385	30.8912	984.43	568.694	278.274	652.519	663.777	281.363	744.246	389.627	208.289	752.807	408.712	224.696	768.057	307.034	211.737	731.866	205.249	-202.905	651.723	645.61	-184.586	741.787	373.444	-118.604	756.38	398.781	-127.763	766.842	298.145	-99.9997	731.551	194.415
395	3.94	50.4789	1196.05	473.608	122.637	1197.12	515.918	-22.5806	1198.24	515.429	219.426	1036.72	646.523	-128.156	1037.7	673.38	30.8708	984.373	568.723	278.299	652.483	663.74	281.369	744.193	389.652	208.26	752.774	408.707	224.707	768.049	307.018	211.73	731.831	205.25	-202.893	651.696	645.581	-184.605	741.754	373.458	-118.627	756.336	398.837	-127.788	766.791	298.163	-100.013	731.532	194.396
396	3.95	50.4371	1195.99	473.65	122.599	1197.07	515.919	-22.6126	1198.19	515.423	219.391	1036.7	646.486	-128.177	1037.67	673.342	30.8307	984.325	568.711	278.313	652.476	663.736	281.364	744.151	389.644	208.216	752.743	408.674	224.672	768.059	306.942	211.703	731.8	205.23	-202.878	651.672	645.578	-184.632	741.729	373.438	-118.659	756.294	398.849	-127.82	766.74	298.192	-100.014	731.506	194.414
397	3.96	50.4128	1195.96	473.621	122.569	1197.05	515.882	-22.6304	1198.16	515.409	219.36	1036.69	646.455	-128.197	1037.65	673.332	30.7939	984.315	568.674	278.312	652.496	663.776	281.346	744.139	389.618	208.199	752.727	408.661	224.667	768.071	306.952	211.696	731.768	205.234	-202.871	651.63	645.553	-184.649	741.72	373.461	-118.678	756.283	398.852	-127.843	766.732	298.214	-100.031	731.489	194.446
398	3.97	50.3881	1195.98	473.574	122.544	1197.07	515.824	-22.6528	1198.17	515.394	219.348	1036.72	646.433	-128.22	1037.64	673.301	30.7725	984.324	568.633	278.299	652.513	663.786	281.335	744.167	389.608	208.202	752.75	408.666	224.665	768.066	306.983	211.697	731.783	205.253	-202.871	651.6	645.539	-184.638	741.736	373.467	-118.69	756.304	398.85	-127.835	766.766	298.202	-100.047	731.5	194.472
399	3.98	50.3817	1196.01	473.493	122.521	1197.11	515.772	-22.6582	1198.18	515.34	219.349	1036.76	646.414	-128.232	1037.64	673.252	30.7641	984.374	568.468	278.275	652.536	663.782	281.319	744.227	389.583	208.207	752.81	408.604	224.634	768.098	306.934	211.692	731.825	205.248	-202.887	651.612	645.594	-184.625	741.768	373.442	-118.682	756.342	398.822	-127.8	766.801	298.188	-100.028	731.528	194.465
400	3.99	50.3858	1196.04	473.333	122.509	1197.15	515.72	-22.6489	1198.16	515.283	219.352	1036.8	646.376	-128.225	1037.64	673.219	30.7942	984.398	568.352	278.254	652.57	663.798	281.317	744.278	389.549	208.219	752.851	408.569	224.63	768.115	306.885	211.697	731.863	205.214	-202.904	651.607	645.646	-184.597	741.788	373.406	-118.628	756.38	398.754	-127.759	766.828	298.129	-100.002	731.547	194.432
401	4	50.4022	1196.06	473.246	122.513	1197.17	515.674	-22.6511	1198.14	515.225	219.359	1036.83	646.361	-128.216	1037.62	673.183	30.8378	984.386	568.403	278.251	652.591	663.796	281.34	744.296	389.557	208.252	752.88	408.593	224.657	768.105	306.904	211.712	731.889	205.191	-202.899	651.579	645.645	-184.568	741.789	373.389	-118.601	756.387	398.715	-127.728	766.84	298.108	-99.9791	731.551	194.419
402	4.01	50.3624	1196.01	473.263	122.48	1197.17	515.635	-22.7003	1198.11	515.215	219.363	1036.84	646.374	-128.226	1037.61	673.168	30.8501	984.338	568.455	278.274	652.613	663.807	281.343	744.3	389.557	208.257	752.876	408.613	224.658	768.113	306.924	211.713	731.891	205.18	-202.883	651.559	645.664	-184.573	741.773	373.417	-118.619	756.368	398.747	-127.744	766.831	298.14	-99.9788	731.542	194.419
403	4.02	50.2595	1195.97	473.278	122.418	1197.15	515.616	-22.7756	1198.04	515.256	219.345	1036.83	646.372	-128.253	1037.59	673.149	30.8281	984.291	568.46	278.333	652.63	663.841	281.33	744.291	389.575	208.243	752.843	408.633	224.641	768.108	306.954	211.699	731.866	205.175	-202.84	651.524	645.644	-184.607	741.758	373.465	-118.65	756.324	398.851	-127.778	766.795	298.208	-99.9974	731.509	194.442
404	4.03	50.1841	1195.9	473.299	122.359	1197.11	515.587	-22.8433	1197.98	515.286	219.328	1036.81	646.356	-128.27	1037.58	673.151	30.8154	984.245	568.495	278.393	652.64	663.877	281.334	744.234	389.621	208.237	752.802	408.659	224.647	768.114	306.949	211.69	731.829	205.194	-202.782	651.446	645.572	-184.633	741.726	373.5	-118.675	756.292	398.9	-127.817	766.763	298.226	-100.014	731.496	194.492
405	4.04	50.1409	1195.83	473.348	122.319	1197.07	515.542	-22.8866	1197.94	515.295	219.323	1036.78	646.343	-128.284	1037.56	673.161	30.8042	984.201	568.516	278.423	652.62	663.884	281.351	744.182	389.64	208.22	752.772	408.653	224.663	768.1	306.986	211.694	731.799	205.22	-202.736	651.397	645.526	-184.631	741.696	373.531	-118.674	756.268	398.905	-127.841	766.744	298.259	-100.029	731.486	194.479
406	4.05	50.1148	1195.79	473.276	122.303	1197.03	515.455	-22.9002	1197.91	515.255	219.327	1036.76	646.294	-128.28	1037.56	673.127	30.815	984.191	568.499	278.427	652.574	663.84	281.379	744.167	389.649	208.226	752.769	408.631	224.696	768.072	306.991	211.712	731.803	205.229	-202.694	651.405	645.529	-184.607	741.695	373.52	-118.646	756.254	398.913	-127.824	766.73	298.26	-100.02	731.482	194.447
407	4.06	50.1275	1195.78	473.145	122.31	1196.99	515.387	-22.8947	1197.91	515.156	219.34	1036.77	646.241	-128.264	1037.58	673.103	30.8214	984.203	568.415	278.448	652.575	663.847	281.398	744.2	389.631	208.277	752.783	408.656	224.716	768.063	307.007	211.741	731.815	205.23	-202.656	651.432	645.58	-184.569	741.706	373.496	-118.592	756.267	398.877	-127.766	766.75	298.226	-99.9876	731.496	194.47
408	4.07	50.1238	1195.8	473.043	122.309	1196.97	515.333	-22.8937	1197.93	515.095	219.346	1036.78	646.193	-128.258	1037.6	673.103	30.8161	984.241	568.324	278.434	652.596	663.845	281.408	744.242	389.635	208.29	752.799	408.646	224.707	768.07	306.985	211.75	731.841	205.23	-202.653	651.482	645.633	-184.544	741.728	373.478	-118.564	756.296	398.831	-127.736	766.802	298.18	-99.9727	731.516	194.458
409	4.08	50.0572	1195.85	472.825	122.273	1196.98	515.23	-22.9188	1197.95	515.032	219.317	1036.82	646.158	-128.287	1037.63	673.094	30.778	984.289	568.229	278.381	652.618	663.809	281.379	744.278	389.62	208.281	752.815	408.624	224.672	768.081	306.949	211.728	731.875	205.208	-202.682	651.534	645.691	-184.552	741.76	373.462	-118.553	756.322	398.807	-127.752	766.836	298.173	-99.9858	731.539	194.438
410	4.09	50.0048	1195.85	472.692	122.218	1196.99	515.082	-22.9382	1197.95	514.971	219.276	1036.83	646.111	-128.32	1037.63	673.085	30.7211	984.307	568.122	278.331	652.622	663.801	281.331	744.304	389.597	208.254	752.852	408.592	224.652	768.092	306.939	211.71	731.883	205.202	-202.715	651.566	645.758	-184.565	741.768	373.472	-118.571	756.346	398.797	-127.765	766.844	298.161	-99.993	731.557	194.428
411	4.1	49.9809	1195.8	472.662	122.173	1196.97	514.985	-22.9679	1197.91	514.958	219.244	1036.82	646.053	-128.351	1037.61	673.069	30.6724	984.31	568.07	278.321	652.621	663.793	281.293	744.309	389.572	208.212	752.856	408.572	224.62	768.118	306.893	211.683	731.878	205.186	-202.734	651.559	645.75	-184.585	741.756	373.454	-118.621	756.349	398.783	-127.77	766.806	298.153	-100.005	731.555	194.424
412	4.11	49.9296	1195.75	472.628	122.13	1196.93	514.944	-23.0233	1197.85	514.948	219.212	1036.8	646.016	-128.386	1037.58	673.04	30.6081	984.299	568.009	278.322	652.622	663.785	281.254	744.301	389.556	208.174	752.833	408.592	224.582	768.138	306.864	211.653	731.85	205.137	-202.742	651.502	645.673	-184.623	741.748	373.447	-118.674	756.339	398.796	-127.823	766.788	298.139	-100.038	731.529	194.439
413	4.12	49.871	1195.7	472.626	122.083	1196.9	514.895	-23.0681	1197.82	514.925	219.188	1036.78	645.999	-128.412	1037.55	673.004	30.5771	984.271	568.001	278.349	652.605	663.769	281.237	744.284	389.539	208.147	752.813	408.592	224.567	768.151	306.848	211.643	731.825	205.138	-202.721	651.429	645.599	-184.657	741.723	373.483	-118.72	756.336	398.842	-127.861	766.761	298.175	-100.066	731.508	194.436
414	4.13	49.8623	1195.68	472.63	122.089	1196.87	514.913	-23.0638	1197.78	514.912	219.186	1036.77	645.986	-128.408	1037.54	673.002	30.567	984.221	568.073	278.411	652.607	663.788	281.268	744.266	389.567	208.149	752.809	408.622	224.576	768.147	306.882	211.659	731.813	205.164	-202.699	651.384	645.554	-184.657	741.72	373.493	-118.72	756.321	398.86	-127.864	766.767	298.204	-100.065	731.519	194.443
415	4.14	49.8886	1195.67	472.556	122.092	1196.86	514.892	-23.0613	1197.75	514.862	219.197	1036.78	645.987	-128.403	1037.52	673.001	30.5875	984.172	568.136	278.449	652.621	663.827	281.324	744.249	389.627	208.17	752.826	408.614	224.61	768.12	306.938	211.687	731.817	205.207	-202.694	651.337	645.5	-184.638	741.735	373.504	-118.694	756.307	398.86	-127.86	766.807	298.184	-100.047	731.521	194.446
416	4.15	49.9111	1195.66	472.449	122.117	1196.84	514.899	-23.059	1197.72	514.782	219.197	1036.79	646	-128.394	1037.5	672.99	30.6324	984.134	568.173	278.434	652.614	663.837	281.364	744.239	389.667	208.208	752.841	408.626	224.656	768.096	306.939	211.712	731.829	205.243	-202.73	651.302	645.472	-184.626	741.745	373.508	-118.658	756.308	398.87	-127.828	766.842	298.157	-100.029	731.517	194.442
417	4.16	49.9157	1195.64	472.374	122.136	1196.83	514.87	-23.0462	1197.69	514.713	219.207	1036.8	645.99	-128.389	1037.5	672.98	30.6671	984.124	568.164	278.417	652.608	663.834	281.376	744.258	389.642	208.252	752.825	408.65	224.694	768.077	306.956	211.739	731.843	205.237	-202.777	651.319	645.513	-184.61	741.74	373.477	-118.636	756.326	398.862	-127.787	766.85	298.137	-100.001	731.524	194.445
418	4.17	49.9074	1195.6	472.335	122.093	1196.84	514.793	-23.0548	1197.66	514.641	219.205	1036.81	645.959	-128.398	1037.51	672.975	30.664	984.127	568.09	278.421	652.646	663.833	281.358	744.284	389.574	208.263	752.835	408.634	224.693	768.087	306.955	211.74	731.865	205.198	-202.797	651.365	645.58	-184.588	741.732	373.479	-118.622	756.332	398.84	-127.756	766.833	298.161	-99.9892	731.528	194.46
419	4.18	49.8489	1195.58	472.339	122.018	1196.84	514.783	-23.1138	1197.61	514.61	219.168	1036.82	645.983	-128.43	1037.51	672.959	30.632	984.12	568.13	278.41	652.697	663.85	281.321	744.306	389.57	208.242	752.848	408.641	224.661	768.117	306.941	211.711	731.873	205.201	-202.825	651.412	645.662	-184.607	741.742	373.495	-118.657	756.329	398.865	-127.775	766.828	298.223	-100.004	731.537	194.481
420	4.19	49.7643	1195.57	472.311	121.94	1196.84	514.775	-23.1882	1197.59	514.619	219.129	1036.82	645.983	-128.478	1037.5	672.947	30.5914	984.107	568.144	278.374	652.72	663.857	281.273	744.304	389.555	208.2	752.828	408.602	224.624	768.133	306.931	211.675	731.873	205.179	-202.86	651.432	645.698	-184.639	741.723	373.503	-118.684	756.32	398.896	-127.813	766.791	298.24	-100.026	731.527	194.48
421	4.2	49.6965	1195.54	472.23	121.881	1196.83	514.708	-23.2237	1197.56	514.601	219.096	1036.82	645.96	-128.514	1037.49	672.944	30.5656	984.112	568.093	278.359	652.687	663.8	281.249	744.296	389.545	208.181	752.819	408.606	224.615	768.112	306.925	211.648	731.855	205.163	-202.875	651.414	645.698	-184.65	741.709	373.497	-118.691	756.313	398.853	-127.83	766.788	298.208	-100.034	731.524	194.467
422	4.21	49.6433	1195.51	472.256	121.815	1196.83	514.635	-23.2667	1197.56	514.617	219.087	1036.83	645.971	-128.525	1037.47	672.962	30.5421	984.091	568.122	278.376	652.7	663.8	281.263	744.299	389.553	208.177	752.821	408.622	224.614	768.124	306.958	211.643	731.84	205.17	-202.831	651.369	645.664	-184.651	741.709	373.503	-118.695	756.297	398.863	-127.838	766.789	298.2	-100.05	731.524	194.473
423	4.22	49.6028	1195.54	472.23	121.762	1196.85	514.595	-23.3122	1197.59	514.623	219.079	1036.84	645.966	-128.525	1037.46	672.981	30.5054	984.132	568.086	278.406	652.701	663.832	281.285	744.318	389.587	208.177	752.834	408.63	224.595	768.151	306.958	211.664	731.839	205.203	-202.752	651.27	645.565	-184.644	741.722	373.498	-118.7	756.329	398.873	-127.841	766.81	298.211	-100.068	731.534	194.46
424	4.23	49.581	1195.6	472.116	121.743	1196.88	514.559	-23.3333	1197.63	514.538	219.08	1036.86	645.929	-128.52	1037.46	672.989	30.5099	984.176	568.002	278.434	652.688	663.827	281.315	744.323	389.584	208.191	752.866	408.604	224.584	768.162	306.926	211.701	731.857	205.23	-202.695	651.18	645.454	-184.634	741.745	373.471	-118.672	756.378	398.808	-127.816	766.852	298.177	-100.053	731.555	194.446
425	4.24	49.5543	1195.62	472.079	121.739	1196.88	514.575	-23.3451	1197.64	514.543	219.083	1036.88	645.913	-128.52	1037.44	672.985	30.4987	984.194	567.943	278.469	652.688	663.835	281.345	744.314	389.6	208.202	752.877	408.576	224.612	768.145	306.933	211.729	731.849	205.257	-202.638	651.128	645.373	-184.616	741.751	373.464	-118.661	756.389	398.778	-127.808	766.872	298.143	-100.024	731.566	194.468
426	4.25	49.5128	1195.57	472.189	121.701	1196.87	514.622	-23.3871	1197.63	514.594	219.07	1036.87	645.919	-128.542	1037.42	672.998	30.5028	984.138	568.023	278.486	652.701	663.857	281.35	744.299	389.623	208.187	752.865	408.569	224.611	768.124	306.946	211.729	731.836	205.261	-202.605	651.129	645.393	-184.61	741.733	373.475	-118.668	756.354	398.811	-127.814	766.851	298.158	-100.014	731.549	194.485
427	4.26	49.4691	1195.53	472.245	121.64	1196.84	514.644	-23.44	1197.59	514.645	219.036	1036.86	645.909	-128.563	1037.4	673.009	30.4891	984.083	568.096	278.467	652.714	663.867	281.32	744.278	389.631	208.184	752.807	408.607	224.632	768.104	306.981	211.698	731.827	205.244	-202.618	651.164	645.464	-184.62	741.698	373.456	-118.679	756.318	398.857	-127.83	766.815	298.178	-100.027	731.536	194.468
428	4.27	49.4083	1195.54	472.224	121.576	1196.82	514.638	-23.4879	1197.55	514.674	218.994	1036.84	645.887	-128.585	1037.37	673.031	30.4437	984.053	568.119	278.432	652.734	663.862	281.294	744.259	389.603	208.17	752.761	408.631	224.625	768.068	306.972	211.657	731.819	205.178	-202.646	651.198	645.559	-184.631	741.67	373.476	-118.691	756.293	398.862	-127.852	766.786	298.224	-100.041	731.513	194.463
429	4.28	49.3442	1195.52	472.282	121.514	1196.83	514.611	-23.5571	1197.54	514.687	218.976	1036.84	645.885	-128.605	1037.36	673.039	30.4183	984.018	568.204	278.405	652.748	663.834	281.261	744.262	389.588	208.154	752.754	408.638	224.618	768.078	306.965	211.624	731.824	205.16	-202.647	651.236	645.648	-184.638	741.671	373.531	-118.705	756.272	398.894	-127.875	766.774	298.249	-100.055	731.504	194.483
430	4.29	49.3238	1195.52	472.328	121.483	1196.86	514.635	-23.5653	1197.55	514.698	218.971	1036.87	645.882	-128.617	1037.35	673.029	30.4155	984.037	568.185	278.401	652.762	663.833	281.244	744.287	389.56	208.154	752.775	408.611	224.617	768.085	306.94	211.634	731.833	205.186	-202.639	651.231	645.666	-184.651	741.685	373.514	-118.721	756.287	398.928	-127.874	766.79	298.23	-100.058	731.517	194.487
431	4.3	49.3161	1195.57	472.246	121.463	1196.91	514.599	-23.5567	1197.59	514.641	218.977	1036.89	645.864	-128.611	1037.35	673.036	30.4295	984.089	568.053	278.407	652.781	663.857	281.261	744.312	389.545	208.176	752.821	408.59	224.595	768.083	306.932	211.66	731.838	205.18	-202.604	651.164	645.571	-184.622	741.703	373.461	-118.676	756.333	398.84	-127.842	766.825	298.185	-100.036	731.528	194.466
432	4.31	49.3143	1195.63	472.196	121.445	1196.97	514.585	-23.5729	1197.62	514.613	218.988	1036.92	645.858	-128.606	1037.35	673.052	30.4372	984.115	568.011	278.421	652.764	663.859	281.292	744.324	389.557	208.179	752.87	408.564	224.588	768.113	306.909	211.69	731.844	205.197	-202.564	651.081	645.47	-184.609	741.723	373.456	-118.651	756.356	398.825	-127.819	766.854	298.17	-100.024	731.538	194.448
433	4.32	49.3034	1195.68	472.228	121.418	1197.02	514.602	-23.6071	1197.63	514.681	218.995	1036.92	645.864	-128.612	1037.35	673.065	30.4402	984.125	567.994	278.467	652.766	663.873	281.328	744.349	389.592	208.187	752.897	408.557	224.609	768.14	306.933	211.702	731.859	205.227	-202.526	650.985	645.36	-184.612	741.738	373.502	-118.657	756.374	398.845	-127.826	766.867	298.215	-100.033	731.556	194.489
434	4.33	49.2596	1195.7	472.201	121.372	1197.05	514.59	-23.6439	1197.63	514.682	218.985	1036.91	645.846	-128.616	1037.33	673.055	30.4262	984.141	567.941	278.484	652.777	663.881	281.336	744.353	389.601	208.203	752.9	408.589	224.612	768.151	306.944	211.705	731.864	205.226	-202.502	650.924	645.262	-184.63	741.725	373.52	-118.664	756.362	398.846	-127.822	766.859	298.207	-100.045	731.564	194.48
435	4.34	49.2178	1195.7	472.191	121.332	1197.06	514.577	-23.6871	1197.62	514.684	218.964	1036.9	645.837	-128.63	1037.32	673.049	30.4156	984.138	567.976	278.481	652.779	663.846	281.313	744.349	389.603	208.183	752.88	408.576	224.582	768.152	306.905	211.697	731.849	205.216	-202.501	650.922	645.275	-184.645	741.706	373.519	-118.678	756.334	398.872	-127.83	766.847	298.2	-100.056	731.559	194.46
436	4.35	49.1811	1195.67	472.262	121.308	1197.03	514.605	-23.7301	1197.6	514.695	218.933	1036.91	645.864	-128.647	1037.31	673.066	30.3825	984.11	568.061	278.471	652.815	663.867	281.29	744.352	389.603	208.152	752.845	408.594	224.603	768.168	306.94	211.677	731.84	205.233	-202.525	650.954	645.322	-184.651	741.692	373.516	-118.704	756.32	398.932	-127.858	766.796	298.267	-100.06	731.547	194.477
437	4.36	49.1395	1195.63	472.251	121.258	1197.01	514.586	-23.7563	1197.58	514.721	218.909	1036.9	645.884	-128.663	1037.31	673.06	30.3583	984.062	568.083	278.445	652.82	663.863	281.265	744.338	389.57	208.14	752.808	408.616	224.61	768.143	306.95	211.648	731.822	205.223	-202.571	651.031	645.43	-184.658	741.679	373.492	-118.699	756.308	398.908	-127.865	766.758	298.275	-100.063	731.531	194.45
438	4.37	49.1167	1195.58	472.259	121.256	1196.96	514.595	-23.7709	1197.56	514.703	218.89	1036.89	645.87	-128.683	1037.29	673.063	30.352	984.01	568.084	278.409	652.826	663.862	281.26	744.314	389.537	208.152	752.79	408.576	224.615	768.106	306.937	211.62	731.817	205.182	-202.607	651.099	645.549	-184.662	741.653	373.455	-118.682	756.275	398.872	-127.851	766.761	298.227	-100.061	731.509	194.447
439	4.38	49.1202	1195.57	472.308	121.286	1196.93	514.673	-23.7711	1197.57	514.732	218.882	1036.9	645.867	-128.693	1037.28	673.075	30.3647	983.985	568.141	278.404	652.836	663.869	281.265	744.295	389.559	208.189	752.773	408.633	224.629	768.07	306.984	211.631	731.822	205.201	-202.63	651.133	645.627	-184.649	741.654	373.483	-118.672	756.268	398.867	-127.854	766.805	298.203	-100.057	731.512	194.45
440	4.39	49.1125	1195.6	472.324	121.277	1196.94	514.648	-23.7773	1197.58	514.751	218.891	1036.92	645.876	-128.677	1037.29	673.07	30.39	983.967	568.232	278.435	652.847	663.869	281.279	744.301	389.591	208.215	752.769	408.679	224.609	768.059	306.993	211.653	731.841	205.205	-202.607	651.129	645.626	-184.639	741.68	373.522	-118.664	756.284	398.889	-127.862	766.843	298.208	-100.043	731.534	194.466
441	4.4	49.1304	1195.63	472.239	121.269	1196.97	514.576	-23.7591	1197.6	514.682	218.901	1036.94	645.854	-128.655	1037.29	673.044	30.41	984.002	568.19	278.476	652.849	663.885	281.317	744.313	389.563	208.22	752.773	408.651	224.61	768.059	306.944	211.68	731.854	205.214	-202.56	651.062	645.502	-184.619	741.71	373.515	-118.66	756.322	398.847	-127.848	766.874	298.164	-100.03	731.553	194.448
442	4.41	49.138	1195.66	472.166	121.28	1196.98	514.564	-23.7505	1197.61	514.634	218.911	1036.93	645.839	-128.657	1037.29	673.036	30.404	984.072	568.105	278.497	652.839	663.899	281.336	744.321	389.572	208.212	752.803	408.609	224.627	768.059	306.957	211.702	731.843	205.234	-202.525	650.978	645.366	-184.605	741.712	373.478	-118.656	756.341	398.835	-127.832	766.885	298.144	-100.025	731.561	194.418
443	4.42	49.12	1195.7	472.141	121.249	1197.02	514.545	-23.7718	1197.62	514.615	218.903	1036.92	645.868	-128.677	1037.3	673.053	30.3561	984.145	568	278.49	652.806	663.895	281.312	744.349	389.582	208.205	752.835	408.643	224.621	768.09	306.942	211.698	731.834	205.249	-202.509	650.928	645.323	-184.633	741.71	373.521	-118.685	756.345	398.857	-127.839	766.854	298.206	-100.047	731.563	194.452
444	4.43	49.0636	1195.71	472.078	121.188	1197.06	514.478	-23.8123	1197.63	514.566	218.876	1036.91	645.882	-128.698	1037.31	673.04	30.2816	984.222	567.837	278.489	652.776	663.893	281.268	744.345	389.562	208.136	752.852	408.576	224.59	768.16	306.894	211.679	731.815	205.22	-202.515	650.891	645.283	-184.669	741.702	373.525	-118.742	756.36	398.844	-127.854	766.809	298.247	-100.077	731.557	194.456
445	4.44	49.0292	1195.69	472.039	121.157	1197.06	514.44	-23.8383	1197.6	514.566	218.859	1036.9	645.854	-128.724	1037.31	672.983	30.2348	984.213	567.814	278.479	652.775	663.879	281.239	744.346	389.527	208.094	752.844	408.525	224.555	768.2	306.856	211.657	731.793	205.183	-202.553	650.894	645.281	-184.701	741.686	373.505	-118.762	756.364	398.827	-127.878	766.772	298.249	-100.111	731.538	194.438
446	4.45	49.0395	1195.65	472.094	121.177	1197.01	514.503	-23.8466	1197.55	514.606	218.84	1036.89	645.838	-128.745	1037.3	672.98	30.2466	984.113	568.012	278.457	652.805	663.87	281.228	744.324	389.55	208.11	752.819	408.605	224.569	768.175	306.886	211.638	731.787	205.213	-202.599	650.957	645.355	-184.717	741.665	373.517	-118.775	756.331	398.887	-127.904	766.755	298.271	-100.106	731.52	194.459
447	4.46	49.0782	1195.6	472.211	121.223	1196.95	514.567	-23.8168	1197.52	514.666	218.834	1036.88	645.806	-128.729	1037.29	673.008	30.2846	984.035	568.167	278.431	652.837	663.867	281.234	744.283	389.561	208.148	752.762	408.66	224.609	768.098	306.937	211.631	731.79	205.228	-202.641	651.046	645.44	-184.69	741.658	373.536	-118.741	756.277	398.937	-127.906	766.758	298.262	-100.069	731.512	194.477
448	4.47	49.1396	1195.55	472.259	121.289	1196.9	514.615	-23.7675	1197.52	514.661	218.853	1036.89	645.794	-128.69	1037.27	673.007	30.3538	983.974	568.207	278.394	652.814	663.84	281.281	744.26	389.583	208.199	752.737	408.68	224.632	768.026	306.976	211.658	731.807	205.228	-202.669	651.117	645.548	-184.658	741.65	373.511	-118.685	756.233	398.931	-127.868	766.791	298.222	-100.027	731.502	194.488
449	4.48	49.1906	1195.56	472.248	121.332	1196.88	514.647	-23.7153	1197.52	514.607	218.874	1036.9	645.802	-128.679	1037.26	672.99	30.4146	983.956	568.213	278.349	652.801	663.83	281.316	744.261	389.609	208.243	752.742	408.688	224.639	767.985	307.01	211.693	731.82	205.238	-202.708	651.112	645.582	-184.643	741.658	373.506	-118.651	756.229	398.889	-127.848	766.848	298.169	-100.015	731.506	194.48
450	4.49	49.1997	1195.61	472.161	121.357	1196.92	514.634	-23.6826	1197.56	514.561	218.886	1036.93	645.82	-128.664	1037.28	672.984	30.4244	983.998	568.159	278.356	652.814	663.851	281.331	744.287	389.628	208.255	752.79	408.672	224.643	768.017	306.99	211.717	731.828	205.264	-202.701	651.112	645.588	-184.643	741.685	373.539	-118.621	756.27	398.848	-127.82	766.882	298.17	-100.019	731.537	194.461
451	4.5	49.2088	1195.65	472.099	121.347	1196.98	514.566	-23.6841	1197.61	514.483	218.899	1036.95	645.819	-128.662	1037.3	672.963	30.4024	984.105	568.016	278.409	652.849	663.891	281.346	744.33	389.633	208.227	752.847	408.597	224.649	768.082	306.95	211.717	731.848	205.249	-202.667	651.067	645.502	-184.625	741.725	373.528	-118.633	756.341	398.832	-127.8	766.892	298.197	-100.019	731.56	194.45
452	4.51	49.1769	1195.69	472.015	121.302	1197.02	514.461	-23.7068	1197.62	514.436	218.897	1036.95	645.803	-128.686	1037.32	672.915	30.3595	984.185	567.887	278.449	652.871	663.926	281.32	744.36	389.577	208.194	752.872	408.565	224.624	768.164	306.899	211.701	731.849	205.207	-202.631	650.993	645.351	-184.626	741.736	373.478	-118.668	756.363	398.812	-127.803	766.867	298.183	-100.015	731.567	194.43
453	4.52	49.1033	1195.68	471.933	121.231	1197.05	514.373	-23.7465	1197.59	514.442	218.877	1036.95	645.813	-128.725	1037.33	672.888	30.2892	984.212	567.82	278.449	652.879	663.935	281.259	744.395	389.525	208.124	752.887	408.536	224.584	768.227	306.856	211.672	731.831	205.177	-202.601	650.951	645.289	-184.666	741.72	373.476	-118.735	756.371	398.806	-127.846	766.81	298.191	-100.053	731.558	194.422
454	4.53	49.0516	1195.64	471.928	121.173	1197.05	514.34	-23.7945	1197.56	514.481	218.844	1036.93	645.829	-128.743	1037.34	672.913	30.227	984.222	567.801	278.453	652.868	663.95	281.202	744.41	389.494	208.075	752.888	408.525	224.558	768.237	306.883	211.643	731.804	205.178	-202.615	650.955	645.311	-184.699	741.687	373.514	-118.779	756.355	398.871	-127.873	766.759	298.26	-100.096	731.552	194.456
455	4.54	49.0667	1195.61	471.978	121.179	1197.01	514.378	-23.8084	1197.53	514.524	218.841	1036.91	645.838	-128.738	1037.33	672.924	30.234	984.189	567.821	278.451	652.845	663.954	281.189	744.391	389.49	208.087	752.846	408.535	224.555	768.204	306.884	211.622	731.787	205.187	-202.637	650.991	645.408	-184.708	741.647	373.537	-118.799	756.32	398.908	-127.889	766.743	298.272	-100.106	731.524	194.514
456	4.55	49.1151	1195.56	472.076	121.235	1196.96	514.418	-23.7804	1197.5	514.515	218.852	1036.91	645.812	-128.703	1037.32	672.915	30.3079	984.103	567.933	278.437	652.847	663.938	281.232	744.351	389.506	208.138	752.805	408.597	224.584	768.122	306.908	211.628	731.804	205.197	-202.676	651.038	645.47	-184.694	741.638	373.531	-118.762	756.292	398.899	-127.888	766.767	298.24	-100.099	731.507	194.504
457	4.56	49.1848	1195.48	472.145	121.329	1196.86	514.492	-23.6971	1197.46	514.5	218.881	1036.9	645.761	-128.653	1037.29	672.917	30.4133	983.988	568.076	278.441	652.86	663.926	281.304	744.309	389.557	208.215	752.761	408.649	224.643	768.032	306.978	211.666	731.82	205.216	-202.696	651.092	645.516	-184.648	741.639	373.502	-118.683	756.254	398.886	-127.858	766.796	298.194	-100.058	731.492	194.481
458	4.57	49.2673	1195.43	472.204	121.418	1196.8	514.564	-23.6195	1197.41	514.495	218.928	1036.9	645.747	-128.607	1037.27	672.909	30.5086	983.915	568.193	278.443	652.856	663.888	281.357	744.287	389.57	208.273	752.711	408.684	224.694	767.978	307.041	211.712	731.821	205.219	-202.695	651.139	645.561	-184.585	741.638	373.494	-118.611	756.226	398.867	-127.824	766.831	298.152	-100.006	731.488	194.446
459	4.58	49.2921	1195.45	472.11	121.446	1196.81	514.557	-23.606	1197.42	514.497	218.944	1036.91	645.761	-128.596	1037.28	672.912	30.5229	983.926	568.207	278.442	652.831	663.872	281.358	744.278	389.584	208.29	752.705	408.706	224.705	767.975	307.031	211.723	731.82	205.242	-202.687	651.128	645.526	-184.573	741.654	373.497	-118.595	756.221	398.854	-127.817	766.857	298.155	-99.9891	731.492	194.421
460	4.59	49.2388	1195.5	471.976	121.395	1196.86	514.474	-23.6575	1197.48	514.425	218.927	1036.89	645.767	-128.617	1037.29	672.905	30.4591	984.024	568.074	278.442	652.785	663.858	281.331	744.295	389.583	208.246	752.763	408.676	224.664	768.019	306.98	211.703	731.829	205.238	-202.672	651.076	645.48	-184.628	741.683	373.505	-118.65	756.253	398.885	-127.843	766.84	298.213	-100.023	731.517	194.437
461	4.6	49.1948	1195.55	471.906	121.341	1196.92	514.396	-23.6931	1197.51	514.384	218.908	1036.87	645.778	-128.643	1037.32	672.92	30.3829	984.141	567.88	278.444	652.742	663.842	281.296	744.325	389.59	208.19	752.808	408.638	224.601	768.095	306.916	211.67	731.821	205.221	-202.662	651.038	645.446	-184.676	741.7	373.503	-118.726	756.306	398.917	-127.868	766.811	298.24	-100.063	731.527	194.45
462	4.61	49.1576	1195.61	471.876	121.277	1196.97	514.311	-23.7103	1197.53	514.398	218.905	1036.87	645.773	-128.664	1037.36	672.922	30.3178	984.247	567.71	278.469	652.76	663.846	281.251	744.36	389.55	208.141	752.849	408.593	224.564	768.189	306.889	211.661	731.794	205.206	-202.622	651.012	645.387	-184.712	741.71	373.487	-118.772	756.349	398.898	-127.863	766.779	298.239	-100.087	731.535	194.459
463	4.62	49.1277	1195.63	471.813	121.256	1196.99	514.242	-23.7175	1197.53	514.42	218.906	1036.87	645.751	-128.671	1037.38	672.877	30.2852	984.289	567.606	278.488	652.774	663.87	281.211	744.399	389.49	208.12	752.866	408.583	224.555	768.238	306.857	211.656	731.792	205.192	-202.586	650.992	645.327	-184.703	741.711	373.467	-118.777	756.387	398.843	-127.857	766.746	298.268	-100.091	731.555	194.431
464	4.63	49.1729	1195.61	471.789	121.294	1196.98	514.256	-23.6988	1197.51	514.434	218.925	1036.86	645.754	-128.646	1037.38	672.87	30.3098	984.275	567.596	278.478	652.758	663.868	281.223	744.395	389.499	208.126	752.866	408.572	224.563	768.205	306.857	211.651	731.798	205.162	-202.59	650.987	645.308	-184.686	741.708	373.46	-118.757	756.38	398.826	-127.847	766.755	298.273	-100.084	731.559	194.422
465	4.64	49.2623	1195.53	471.926	121.385	1196.91	514.346	-23.6418	1197.51	514.463	218.951	1036.86	645.754	-128.598	1037.35	672.898	30.4153	984.165	567.825	278.46	652.747	663.861	281.294	744.329	389.574	208.191	752.829	408.598	224.605	768.129	306.923	211.681	731.817	205.198	-202.605	651.002	645.369	-184.656	741.692	373.482	-118.708	756.335	398.857	-127.836	766.798	298.245	-100.055	731.537	194.464
466	4.65	49.3431	1195.44	472.084	121.495	1196.81	514.473	-23.5699	1197.47	514.483	218.973	1036.86	645.759	-128.549	1037.31	672.915	30.5227	984.009	568.127	278.456	652.763	663.889	281.342	744.276	389.635	208.279	752.755	408.7	224.68	768.007	307.036	211.731	731.814	205.284	-202.639	651.056	645.447	-184.608	741.659	373.54	-118.638	756.271	398.868	-127.825	766.845	298.224	-100.024	731.498	194.503
467	4.66	49.3922	1195.36	472.159	121.588	1196.73	514.571	-23.4965	1197.4	514.505	218.992	1036.85	645.74	-128.521	1037.3	672.927	30.5935	983.899	568.252	278.422	652.767	663.867	281.381	744.246	389.658	208.349	752.668	408.801	224.73	767.936	307.107	211.757	731.784	205.305	-202.679	651.142	645.553	-184.564	741.63	373.523	-118.602	756.223	398.87	-127.804	766.854	298.189	-99.9762	731.465	194.499
468	4.67	49.3886	1195.36	472.116	121.614	1196.72	514.592	-23.4685	1197.38	514.499	218.999	1036.85	645.742	-128.513	1037.3	672.9	30.6002	983.885	568.228	278.398	652.772	663.86	281.385	744.235	389.633	208.34	752.667	408.78	224.748	767.944	307.086	211.767	731.786	205.27	-202.694	651.175	645.584	-184.561	741.629	373.513	-118.594	756.203	398.874	-127.803	766.826	298.188	-99.9738	731.473	194.456
469	4.68	49.3518	1195.42	472.016	121.538	1196.78	514.495	-23.5249	1197.43	514.435	218.979	1036.85	645.751	-128.541	1037.32	672.874	30.513	983.977	568.09	278.409	652.784	663.868	281.32	744.267	389.573	208.255	752.735	408.673	224.682	768.023	306.977	211.718	731.811	205.218	-202.675	651.163	645.544	-184.603	741.649	373.505	-118.653	756.235	398.879	-127.824	766.785	298.222	-100.011	731.492	194.436
470	4.69	49.2815	1195.49	471.946	121.416	1196.89	514.35	-23.6017	1197.47	514.39	218.954	1036.85	645.763	-128.599	1037.36	672.844	30.3813	984.112	567.88	278.434	652.79	663.898	281.23	744.32	389.508	208.131	752.797	408.561	224.58	768.159	306.865	211.648	731.815	205.167	-202.638	651.125	645.473	-184.677	741.679	373.493	-118.747	756.302	398.876	-127.874	766.762	298.248	-100.064	731.512	194.433
471	4.7	49.2342	1195.57	471.842	121.347	1196.97	514.256	-23.6354	1197.52	514.373	218.936	1036.85	645.779	-128.625	1037.4	672.854	30.3055	984.245	567.69	278.445	652.76	663.897	281.171	744.37	389.473	208.064	752.857	408.511	224.524	768.245	306.863	211.61	731.802	205.138	-202.618	651.066	645.411	-184.729	741.71	373.476	-118.794	756.355	398.857	-127.911	766.753	298.275	-100.107	731.544	194.462
472	4.71	49.2522	1195.61	471.824	121.341	1197.01	514.213	-23.6311	1197.56	514.379	218.945	1036.87	645.797	-128.623	1037.42	672.869	30.3067	984.328	567.573	278.446	652.737	663.881	281.178	744.407	389.499	208.066	752.909	408.481	224.526	768.279	306.898	211.62	731.824	205.161	-202.612	651.016	645.36	-184.743	741.741	373.496	-118.791	756.396	398.837	-127.9	766.781	298.279	-100.126	731.559	194.478
473	4.72	49.3107	1195.61	471.816	121.403	1196.98	514.24	-23.5761	1197.56	514.358	218.986	1036.88	645.786	-128.581	1037.41	672.846	30.3648	984.323	567.585	278.45	652.737	663.871	281.232	744.404	389.521	208.126	752.918	408.503	224.557	768.231	306.899	211.66	731.844	205.177	-202.604	651.006	645.339	-184.695	741.744	373.494	-118.749	756.405	398.818	-127.867	766.799	298.238	-100.096	731.555	194.478
474	4.73	49.4062	1195.57	471.85	121.546	1196.88	514.348	-23.476	1197.54	514.329	219.032	1036.88	645.752	-128.525	1037.38	672.841	30.485	984.193	567.757	278.449	652.747	663.875	281.314	744.339	389.54	208.214	752.856	408.586	224.618	768.115	306.943	211.709	731.853	205.187	-202.624	651.029	645.343	-184.626	741.724	373.467	-118.669	756.36	398.818	-127.81	766.828	298.153	-100.035	731.546	194.439
475	4.74	49.4804	1195.5	471.997	121.669	1196.8	514.464	-23.3804	1197.47	514.412	219.059	1036.87	645.759	-128.46	1037.33	672.878	30.6216	984.019	568.055	278.419	652.743	663.844	281.388	744.279	389.613	208.308	752.768	408.71	224.692	768.022	307.016	211.758	731.837	205.25	-202.652	651.07	645.401	-184.573	741.688	373.496	-118.602	756.279	398.863	-127.778	766.854	298.122	-99.9877	731.515	194.43
476	4.75	49.5065	1195.4	472.202	121.714	1196.74	514.555	-23.3705	1197.38	514.479	219.048	1036.84	645.759	-128.453	1037.29	672.894	30.6575	983.916	568.211	278.395	652.732	663.844	281.401	744.248	389.673	208.328	752.707	408.763	224.722	767.974	307.057	211.763	731.798	205.283	-202.693	651.11	645.492	-184.56	741.646	373.519	-118.588	756.212	398.893	-127.803	766.842	298.16	-99.9775	731.476	194.468
477	4.76	49.4667	1195.34	472.262	121.672	1196.71	514.576	-23.4154	1197.34	514.494	219.018	1036.8	645.745	-128.475	1037.27	672.885	30.6154	983.887	568.214	278.382	652.726	663.827	281.35	744.214	389.635	208.276	752.667	408.738	224.705	767.969	307.034	211.723	731.767	205.253	-202.688	651.158	645.572	-184.589	741.611	373.518	-118.623	756.176	398.925	-127.847	766.783	298.236	-100.001	731.463	194.462
478	4.77	49.3777	1195.34	472.225	121.586	1196.73	514.516	-23.4882	1197.36	514.482	218.992	1036.77	645.735	-128.51	1037.29	672.868	30.5282	983.916	568.117	278.382	652.728	663.841	281.294	744.208	389.594	208.187	752.674	408.694	224.667	768.024	306.999	211.663	731.771	205.209	-202.667	651.169	645.561	-184.636	741.608	373.509	-118.688	756.195	398.95	-127.881	766.739	298.258	-100.041	731.464	194.466
479	4.78	49.3158	1195.41	472.108	121.496	1196.78	514.418	-23.5585	1197.42	514.473	218.974	1036.77	645.758	-128.535	1037.31	672.836	30.4452	984.006	568.013	278.409	652.705	663.854	281.241	744.263	389.56	208.129	752.738	408.651	224.613	768.112	306.953	211.62	731.78	205.173	-202.623	651.122	645.495	-184.683	741.625	373.529	-118.745	756.244	398.943	-127.906	766.724	298.268	-100.079	731.491	194.461
480	4.79	49.3002	1195.51	471.897	121.442	1196.86	514.292	-23.5704	1197.49	514.402	218.989	1036.78	645.745	-128.544	1037.36	672.802	30.4078	984.145	567.807	278.442	652.683	663.852	281.214	744.324	389.54	208.11	752.827	408.581	224.552	768.178	306.891	211.623	731.804	205.178	-202.566	651.065	645.403	-184.703	741.683	373.518	-118.76	756.329	398.887	-127.888	766.76	298.289	-100.089	731.534	194.444
481	4.8	49.3499	1195.61	471.71	121.47	1196.94	514.189	-23.5159	1197.57	514.277	219.032	1036.81	645.736	-128.517	1037.42	672.815	30.4288	984.261	567.616	278.478	652.678	663.856	281.267	744.369	389.563	208.144	752.888	408.566	224.538	768.202	306.88	211.673	731.836	205.202	-202.53	651.022	645.314	-184.664	741.747	373.468	-118.718	756.407	398.777	-127.816	766.812	298.22	-100.054	731.579	194.43
482	4.81	49.4227	1195.67	471.638	121.567	1196.95	514.195	-23.4472	1197.61	514.203	219.07	1036.85	645.762	-128.47	1037.43	672.821	30.5139	984.294	567.614	278.488	652.687	663.886	281.337	744.396	389.594	208.185	752.922	408.575	224.573	768.192	306.905	211.72	731.867	205.222	-202.519	650.986	645.249	-184.605	741.782	373.455	-118.658	756.453	398.732	-127.749	766.87	298.173	-100.02	731.598	194.438
483	4.82	49.4706	1195.62	471.689	121.629	1196.91	514.219	-23.4134	1197.59	514.191	219.082	1036.86	645.747	-128.451	1037.41	672.843	30.5735	984.241	567.7	278.456	652.677	663.883	281.363	744.387	389.597	208.239	752.9	408.611	224.629	768.148	306.926	211.747	731.889	205.236	-202.559	651.002	645.299	-184.579	741.765	373.467	-118.607	756.432	398.754	-127.722	766.883	298.15	-100.001	731.587	194.42
484	4.83	49.4787	1195.48	471.825	121.65	1196.8	514.284	-23.4053	1197.5	514.221	219.064	1036.82	645.705	-128.449	1037.37	672.852	30.5874	984.106	567.841	278.432	652.675	663.854	281.368	744.319	389.575	208.259	752.834	408.627	224.664	768.077	306.956	211.745	731.86	205.233	-202.609	651.087	645.423	-184.574	741.707	373.461	-118.596	756.354	398.792	-127.741	766.852	298.119	-99.9994	731.553	194.415
485	4.84	49.4463	1195.3	472.02	121.64	1196.68	514.381	-23.4363	1197.38	514.334	219.015	1036.78	645.665	-128.47	1037.32	672.837	30.5628	983.952	568.028	278.413	652.696	663.833	281.334	744.238	389.571	208.245	752.734	408.678	224.685	768.011	306.991	211.717	731.802	205.235	-202.662	651.168	645.526	-184.594	741.649	373.471	-118.639	756.247	398.865	-127.832	766.792	298.189	-100.017	731.504	194.438
486	4.85	49.3862	1195.16	472.197	121.576	1196.59	514.427	-23.4857	1197.28	514.422	218.953	1036.75	645.684	-128.505	1037.29	672.86	30.5112	983.808	568.256	278.395	652.738	663.857	281.28	744.168	389.605	208.212	752.641	408.775	224.691	767.989	307.047	211.667	731.759	205.255	-202.7	651.214	645.565	-184.642	741.607	373.525	-118.697	756.178	398.935	-127.918	766.721	298.257	-100.063	731.47	194.486
487	4.86	49.3508	1195.12	472.197	121.545	1196.56	514.424	-23.5328	1197.25	514.42	218.915	1036.74	645.686	-128.535	1037.28	672.841	30.45	983.78	568.269	278.361	652.72	663.833	281.255	744.153	389.62	208.168	752.628	408.77	224.666	768.001	307.037	211.62	731.75	205.237	-202.729	651.237	645.619	-184.679	741.603	373.547	-118.744	756.176	398.927	-127.938	766.694	298.266	-100.089	731.459	194.489
488	4.87	49.3349	1195.2	472.046	121.511	1196.6	514.307	-23.5454	1197.31	514.349	218.909	1036.75	645.669	-128.552	1037.29	672.792	30.4319	983.895	568.057	278.379	652.687	663.812	281.253	744.206	389.568	208.136	752.7	408.664	224.616	768.05	306.924	211.618	731.774	205.189	-202.721	651.209	645.615	-184.682	741.626	373.505	-118.751	756.242	398.862	-127.905	766.726	298.238	-100.086	731.491	194.445
489	4.88	49.3148	1195.33	471.827	121.479	1196.7	514.196	-23.5313	1197.4	514.238	218.93	1036.78	645.661	-128.553	1037.34	672.777	30.4222	984.072	567.788	278.421	652.697	663.851	281.276	744.29	389.543	208.142	752.794	408.581	224.576	768.098	306.871	211.641	731.82	205.191	-202.665	651.105	645.465	-184.675	741.683	373.469	-118.733	756.335	398.798	-127.873	766.782	298.21	-100.082	731.537	194.411
490	4.89	49.318	1195.44	471.65	121.462	1196.81	514.14	-23.5197	1197.49	514.126	218.955	1036.84	645.686	-128.559	1037.38	672.786	30.4196	984.205	567.643	278.438	652.708	663.883	281.307	744.366	389.584	208.155	752.873	408.566	224.547	768.154	306.885	211.671	731.857	205.234	-202.621	651.029	645.363	-184.661	741.74	373.476	-118.713	756.414	398.78	-127.855	766.85	298.169	-100.06	731.589	194.398
491	4.9	49.3589	1195.53	471.492	121.468	1196.85	514.112	-23.5148	1197.51	514.074	218.973	1036.87	645.693	-128.557	1037.4	672.798	30.4456	984.254	567.545	278.455	652.705	663.905	281.314	744.41	389.598	208.19	752.914	408.568	224.55	768.184	306.923	211.703	731.879	205.274	-202.611	650.964	645.307	-184.647	741.776	373.484	-118.692	756.463	398.756	-127.805	766.9	298.156	-100.036	731.605	194.421
492	4.91	49.376	1195.54	471.448	121.476	1196.85	514.104	-23.5196	1197.48	514.03	218.98	1036.88	645.686	-128.556	1037.37	672.784	30.4689	984.245	567.509	278.467	652.719	663.897	281.333	744.416	389.58	208.212	752.911	408.565	224.581	768.175	306.943	211.72	731.879	205.281	-202.598	650.929	645.296	-184.613	741.764	373.468	-118.662	756.445	398.766	-127.778	766.907	298.161	-100.019	731.597	194.439
493	4.92	49.3613	1195.42	471.593	121.468	1196.77	514.152	-23.543	1197.39	514.042	218.945	1036.86	645.677	-128.564	1037.3	672.757	30.4669	984.095	567.668	278.461	652.757	663.919	281.33	744.351	389.592	208.228	752.848	408.616	224.64	768.127	306.916	211.71	731.85	205.272	-202.609	650.933	645.351	-184.598	741.704	373.497	-118.659	756.354	398.811	-127.786	766.846	298.185	-100.014	731.544	194.457
494	4.93	49.3013	1195.23	471.793	121.431	1196.63	514.244	-23.6205	1197.24	514.076	218.9	1036.81	645.645	-128.594	1037.21	672.733	30.4487	983.857	567.992	278.432	652.772	663.91	281.312	744.253	389.617	208.218	752.726	408.701	224.675	768.056	306.933	211.688	731.79	205.255	-202.653	650.955	645.443	-184.61	741.622	373.508	-118.684	756.236	398.887	-127.812	766.755	298.214	-100.026	731.485	194.463
495	4.94	49.2376	1195.08	471.944	121.369	1196.54	514.274	-23.6991	1197.11	514.142	218.861	1036.8	645.643	-128.616	1037.14	672.698	30.429	983.685	568.176	278.408	652.802	663.917	281.282	744.188	389.613	208.193	752.634	408.728	224.691	768.005	306.985	211.657	731.751	205.232	-202.682	650.999	645.542	-184.649	741.56	373.534	-118.709	756.164	398.974	-127.867	766.698	298.235	-100.056	731.447	194.485
496	4.95	49.1776	1195.03	472.014	121.31	1196.52	514.268	-23.7747	1197.03	514.178	218.845	1036.82	645.654	-128.629	1037.11	672.669	30.4192	983.615	568.22	278.407	652.818	663.912	281.262	744.182	389.615	208.17	752.611	408.747	224.654	767.989	306.986	211.635	731.745	205.26	-202.674	650.983	645.551	-184.678	741.548	373.585	-118.724	756.163	399.017	-127.916	766.702	298.285	-100.072	731.456	194.496
497	4.96	49.1455	1195.07	471.964	121.249	1196.57	514.199	-23.823	1197.04	514.159	218.852	1036.86	645.648	-128.64	1037.14	672.687	30.4242	983.657	568.165	278.437	652.836	663.929	281.28	744.22	389.632	208.178	752.662	408.729	224.628	767.998	307.01	211.654	731.764	205.282	-202.646	650.932	645.465	-184.684	741.589	373.593	-118.714	756.196	398.972	-127.914	766.746	298.275	-100.059	731.482	194.492
498	4.97	49.1451	1195.18	471.738	121.207	1196.67	514.061	-23.8376	1197.12	513.995	218.872	1036.89	645.611	-128.644	1037.17	672.683	30.4367	983.815	567.949	278.475	652.841	663.922	281.322	744.291	389.637	208.211	752.76	408.641	224.614	768.043	307.009	211.675	731.82	205.265	-202.598	650.875	645.383	-184.652	741.667	373.533	-118.686	756.297	398.885	-127.862	766.828	298.217	-100.038	731.522	194.487
499	4.98	49.1403	1195.27	471.504	121.19	1196.76	513.92	-23.8569	1197.2	513.791	218.905	1036.9	645.572	-128.638	1037.22	672.653	30.4459	983.98	567.66	278.514	652.818	663.921	281.344	744.36	389.586	208.239	752.837	408.584	224.596	768.092	306.938	211.7	731.864	205.237	-202.539	650.79	645.281	-184.607	741.73	373.478	-118.651	756.388	398.794	-127.801	766.883	298.155	-100.019	731.573	194.45
500	4.99	49.0951	1195.31	471.396	121.152	1196.8	513.803	-23.896	1197.21	513.678	218.906	1036.9	645.529	-128.644	1037.24	672.624	30.4222	984.067	567.499	278.542	652.797	663.918	281.341	744.385	389.57	208.228	752.881	408.542	224.585	768.134	306.863	211.709	731.875	205.212	-202.489	650.737	645.181	-184.585	741.746	373.452	-118.638	756.415	398.741	-127.769	766.895	298.122	-100.007	731.594	194.419
501	5	49.0199	1195.27	471.43	121.089	1196.78	513.759	-23.9713	1197.18	513.718	218.874	1036.89	645.503	-128.684	1037.25	672.616	30.3495	984.073	567.456	278.547	652.786	663.892	281.321	744.373	389.604	208.202	752.888	408.546	224.579	768.167	306.859	211.693	731.859	205.224	-202.461	650.731	645.168	-184.604	741.739	373.472	-118.672	756.405	398.752	-127.787	766.884	298.138	-100.028	731.595	194.434
502	5.01	48.934	1195.17	471.535	121.025	1196.7	513.75	-24.0563	1197.13	513.783	218.825	1036.84	645.465	-128.726	1037.23	672.643	30.2974	983.976	567.585	278.517	652.787	663.867	281.295	744.328	389.614	208.178	752.847	408.602	224.574	768.174	306.886	211.649	731.825	205.204	-202.471	650.798	645.273	-184.632	741.698	373.508	-118.712	756.351	398.826	-127.832	766.82	298.211	-100.055	731.566	194.474
503	5.02	48.8687	1195.03	471.685	120.979	1196.57	513.773	-24.1265	1197.04	513.827	218.77	1036.81	645.419	-128.752	1037.2	672.64	30.2526	983.79	567.779	278.489	652.809	663.874	281.256	744.272	389.592	208.146	752.747	408.65	224.595	768.109	306.931	211.604	731.78	205.184	-202.503	650.869	645.368	-184.676	741.632	373.562	-118.733	756.256	398.909	-127.885	766.728	298.285	-100.08	731.505	194.497
504	5.03	48.8377	1194.92	471.777	120.966	1196.45	513.763	-24.161	1196.96	513.848	218.732	1036.8	645.396	-128.774	1037.15	672.624	30.2222	983.675	567.853	278.46	652.839	663.866	281.227	744.234	389.558	208.137	752.676	408.677	224.61	768.059	306.94	211.596	731.762	205.17	-202.54	650.903	645.42	-184.69	741.589	373.584	-118.738	756.201	398.936	-127.912	766.687	298.288	-100.08	731.471	194.509
505	5.04	48.8286	1194.89	471.75	120.966	1196.42	513.727	-24.174	1196.96	513.802	218.724	1036.82	645.359	-128.784	1037.14	672.598	30.2389	983.671	567.844	278.44	652.861	663.855	281.224	744.243	389.549	208.159	752.693	408.686	224.615	768.032	306.972	211.607	731.793	205.165	-202.556	650.903	645.473	-184.674	741.589	373.547	-118.719	756.208	398.949	-127.894	766.732	298.254	-100.069	731.475	194.487
506	5.05	48.8546	1194.92	471.665	120.99	1196.45	513.728	-24.1575	1197	513.723	218.728	1036.85	645.337	-128.787	1037.14	672.599	30.2814	983.736	567.769	278.432	652.874	663.89	281.279	744.274	389.586	208.181	752.743	408.641	224.608	768.027	306.974	211.641	731.827	205.187	-202.562	650.856	645.468	-184.652	741.623	373.543	-118.695	756.253	398.906	-127.87	766.818	298.231	-100.048	731.5	194.491
507	5.06	48.9013	1194.97	471.617	121.023	1196.48	513.719	-24.118	1197.02	513.676	218.749	1036.89	645.337	-128.773	1037.15	672.613	30.3055	983.796	567.69	278.467	652.878	663.929	281.327	744.307	389.623	208.209	752.786	408.618	224.62	768.037	307.003	211.688	731.849	205.274	-202.533	650.769	645.37	-184.62	741.66	373.537	-118.652	756.299	398.858	-127.838	766.889	298.218	-100.027	731.544	194.493
508	5.07	48.9252	1195.01	471.544	121.04	1196.5	513.692	-24.0989	1197.01	513.624	218.76	1036.92	645.317	-128.759	1037.14	672.6	30.3186	983.848	567.564	278.519	652.875	663.93	281.372	744.331	389.642	208.245	752.809	408.642	224.632	768.044	306.989	211.738	731.854	205.321	-202.485	650.674	645.236	-184.588	741.687	373.529	-118.626	756.339	398.857	-127.818	766.929	298.208	-100.002	731.57	194.466
509	5.08	48.9112	1195	471.468	121.015	1196.5	513.659	-24.1258	1196.99	513.588	218.737	1036.92	645.302	-128.778	1037.13	672.594	30.2843	983.85	567.49	278.545	652.849	663.899	281.383	744.333	389.606	208.244	752.844	408.645	224.627	768.069	306.942	211.731	731.844	205.304	-202.461	650.613	645.13	-184.599	741.692	373.523	-118.649	756.362	398.851	-127.808	766.903	298.24	-100.001	731.575	194.461
510	5.09	48.8436	1194.94	471.441	120.909	1196.51	513.61	-24.1979	1196.94	513.583	218.691	1036.89	645.296	-128.83	1037.1	672.565	30.2007	983.799	567.501	278.543	652.845	663.883	281.308	744.336	389.524	208.188	752.868	408.613	224.607	768.106	306.919	211.676	731.812	205.251	-202.483	650.606	645.125	-184.655	741.665	373.509	-118.722	756.333	398.858	-127.848	766.839	298.223	-100.044	731.553	194.431
511	5.1	48.7551	1194.9	471.47	120.796	1196.51	513.589	-24.3028	1196.9	513.602	218.639	1036.86	645.308	-128.891	1037.08	672.516	30.1017	983.783	567.507	278.528	652.843	663.876	281.22	744.351	389.517	208.108	752.837	408.567	224.577	768.152	306.936	211.625	731.774	205.214	-202.547	650.631	645.189	-184.715	741.634	373.523	-118.794	756.314	398.9	-127.897	766.774	298.249	-100.084	731.531	194.421
512	5.11	48.6959	1194.85	471.531	120.744	1196.49	513.595	-24.3633	1196.86	513.601	218.593	1036.86	645.311	-128.923	1037.06	672.508	30.0238	983.744	567.53	278.498	652.836	663.837	281.169	744.353	389.506	208.064	752.8	408.562	224.553	768.176	306.924	211.578	731.776	205.176	-202.597	650.678	645.307	-184.752	741.618	373.547	-118.83	756.308	398.947	-127.941	766.741	298.312	-100.118	731.519	194.461
513	5.12	48.6722	1194.83	471.498	120.747	1196.46	513.617	-24.3955	1196.82	513.596	218.557	1036.86	645.285	-128.945	1037.03	672.508	30.0049	983.695	567.536	278.48	652.876	663.836	281.167	744.338	389.501	208.071	752.777	408.557	224.552	768.132	306.898	211.568	731.795	205.157	-202.65	650.71	645.38	-184.769	741.622	373.535	-118.82	756.296	398.934	-127.947	766.762	298.312	-100.122	731.519	194.444
514	5.13	48.7083	1194.82	471.466	120.777	1196.45	513.64	-24.3847	1196.8	513.572	218.573	1036.88	645.282	-128.937	1037.01	672.52	30.0945	983.654	567.611	278.473	652.93	663.862	281.216	744.329	389.539	208.138	752.77	408.611	224.583	768.059	306.946	211.602	731.824	205.166	-202.663	650.714	645.367	-184.715	741.637	373.499	-118.772	756.282	398.901	-127.92	766.823	298.253	-100.091	731.538	194.42
515	5.14	48.7512	1194.82	471.479	120.816	1196.45	513.676	-24.3487	1196.8	513.549	218.611	1036.93	645.277	-128.915	1037.01	672.533	30.1945	983.656	567.699	278.478	652.964	663.891	281.306	744.332	389.586	208.215	752.787	408.637	224.627	768.008	307.006	211.675	731.847	205.214	-202.62	650.671	645.313	-184.64	741.666	373.493	-118.691	756.282	398.868	-127.858	766.883	298.211	-100.041	731.553	194.412
516	5.15	48.7629	1194.84	471.471	120.828	1196.46	513.689	-24.3517	1196.81	513.538	218.627	1036.95	645.265	-128.901	1037.01	672.561	30.2281	983.662	567.693	278.504	652.968	663.923	281.351	744.327	389.599	208.27	752.791	408.669	224.642	767.991	306.967	211.725	731.85	205.257	-202.554	650.598	645.26	-184.598	741.678	373.522	-118.64	756.286	398.87	-127.809	766.923	298.192	-100.009	731.554	194.427
517	5.16	48.6951	1194.85	471.503	120.775	1196.46	513.662	-24.4075	1196.82	513.555	218.609	1036.96	645.296	-128.92	1037	672.604	30.1836	983.651	567.685	278.525	652.965	663.951	281.344	744.33	389.618	208.25	752.802	408.654	224.652	768.022	306.958	211.724	731.846	205.269	-202.505	650.541	645.231	-184.603	741.666	373.553	-118.653	756.287	398.878	-127.815	766.896	298.201	-100.028	731.56	194.457
518	5.17	48.5769	1194.83	471.555	120.662	1196.47	513.634	-24.4969	1196.82	513.624	218.568	1036.94	645.325	-128.963	1036.98	672.611	30.0798	983.634	567.718	278.536	652.976	663.985	281.298	744.339	389.618	208.191	752.803	408.646	224.629	768.064	306.984	211.683	731.81	205.273	-202.445	650.475	645.172	-184.662	741.641	373.577	-118.707	756.287	398.9	-127.875	766.845	298.225	-100.058	731.558	194.509
519	5.18	48.433	1194.82	471.565	120.529	1196.51	513.565	-24.6008	1196.83	513.667	218.505	1036.93	645.302	-129.016	1036.96	672.593	29.9359	983.618	567.73	278.557	653.016	664.032	281.223	744.348	389.57	208.102	752.797	408.604	224.571	768.138	306.905	211.62	731.775	205.241	-202.392	650.446	645.116	-184.727	741.609	373.567	-118.78	756.273	398.939	-127.927	766.777	298.281	-100.091	731.533	194.502
520	5.19	48.3326	1194.83	471.563	120.446	1196.53	513.516	-24.6838	1196.81	513.689	218.456	1036.94	645.277	-129.052	1036.95	672.6	29.8571	983.609	567.703	278.557	653.035	664.008	281.17	744.36	389.495	208.028	752.802	408.519	224.543	768.178	306.849	211.579	731.762	205.188	-202.375	650.455	645.121	-184.743	741.588	373.536	-118.817	756.257	398.943	-127.965	766.723	298.317	-100.124	731.518	194.484
521	5.2	48.3064	1194.83	471.615	120.441	1196.56	513.575	-24.7149	1196.83	513.723	218.452	1036.95	645.297	-129.06	1036.94	672.623	29.8641	983.624	567.69	278.542	653.027	663.975	281.177	744.371	389.505	208.053	752.797	408.544	224.519	768.171	306.86	211.572	731.78	205.175	-202.384	650.466	645.156	-184.734	741.606	373.549	-118.801	756.284	398.926	-127.953	766.739	298.315	-100.12	731.528	194.491
522	5.21	48.3404	1194.89	471.652	120.463	1196.6	513.604	-24.6932	1196.86	513.72	218.478	1036.97	645.29	-129.043	1036.95	672.668	29.9385	983.652	567.71	278.505	653.031	663.972	281.229	744.387	389.554	208.128	752.828	408.584	224.539	768.136	306.907	211.615	731.838	205.203	-202.393	650.471	645.221	-184.696	741.638	373.559	-118.747	756.325	398.889	-127.888	766.82	298.288	-100.083	731.553	194.487
523	5.22	48.3833	1194.95	471.618	120.493	1196.64	513.615	-24.6801	1196.89	513.712	218.515	1037	645.283	-129.017	1036.95	672.71	30.0132	983.714	567.623	278.485	653.055	664.01	281.286	744.39	389.571	208.178	752.848	408.566	224.572	768.082	306.949	211.655	731.879	205.213	-202.396	650.47	645.254	-184.639	741.658	373.541	-118.667	756.342	398.858	-127.826	766.905	298.213	-100.05	731.56	194.458
524	5.23	48.3904	1195.01	471.553	120.53	1196.66	513.677	-24.6718	1196.92	513.687	218.528	1037.02	645.271	-128.993	1036.94	672.747	30.0559	983.764	567.579	278.476	653.06	663.981	281.318	744.39	389.581	208.214	752.852	408.599	224.603	768.04	306.941	211.69	731.89	205.226	-202.39	650.449	645.24	-184.589	741.672	373.541	-118.604	756.361	398.831	-127.804	766.951	298.159	-100.017	731.579	194.463
525	5.24	48.3438	1195.06	471.531	120.477	1196.7	513.662	-24.7149	1196.93	513.695	218.512	1037.03	645.261	-129.006	1036.92	672.721	30.0443	983.763	567.606	278.497	653.053	663.955	281.316	744.397	389.576	208.209	752.858	408.583	224.607	768.059	306.933	211.69	731.884	205.236	-202.356	650.406	645.146	-184.604	741.68	373.545	-118.626	756.368	398.858	-127.816	766.935	298.178	-100.019	731.591	194.466
526	5.25	48.241	1195.06	471.632	120.389	1196.71	513.645	-24.8039	1196.91	513.75	218.462	1037.01	645.256	-129.04	1036.88	672.721	29.9661	983.689	567.693	278.527	653.055	663.962	281.283	744.382	389.568	208.136	752.831	408.534	224.578	768.088	306.894	211.651	731.836	205.227	-202.321	650.338	645.042	-184.667	741.646	373.528	-118.702	756.311	398.927	-127.869	766.858	298.232	-100.069	731.565	194.446
527	5.26	48.124	1194.99	471.827	120.304	1196.69	513.681	-24.9001	1196.87	513.852	218.413	1036.97	645.29	-129.086	1036.84	672.745	29.8589	983.579	567.804	278.539	653.024	663.946	281.219	744.34	389.572	208.06	752.768	408.579	224.537	768.107	306.889	211.597	731.761	205.233	-202.29	650.294	645.01	-184.719	741.582	373.58	-118.77	756.261	398.971	-127.935	766.773	298.278	-100.112	731.517	194.493
528	5.27	48.0241	1194.95	471.956	120.251	1196.69	513.722	-24.9682	1196.85	513.951	218.379	1036.95	645.305	-129.114	1036.79	672.748	29.8022	983.487	567.956	278.554	653.003	663.927	281.175	744.298	389.547	208.019	752.698	408.615	224.541	768.097	306.93	211.571	731.706	205.256	-202.277	650.257	644.991	-184.757	741.537	373.636	-118.816	756.223	399.022	-127.986	766.711	298.335	-100.142	731.478	194.546
529	5.28	47.9732	1194.95	472.009	120.232	1196.69	513.736	-24.9861	1196.84	513.941	218.379	1036.95	645.303	-129.126	1036.78	672.736	29.7745	983.473	567.942	278.582	653.02	663.947	281.169	744.281	389.529	208.005	752.685	408.599	224.538	768.054	306.957	211.563	731.714	205.241	-202.281	650.254	644.984	-184.763	741.541	373.613	-118.818	756.192	399.015	-128.007	766.708	298.339	-100.143	731.485	194.529
530	5.29	47.9934	1194.98	471.936	120.254	1196.73	513.724	-24.9748	1196.87	513.884	218.393	1036.98	645.294	-129.103	1036.8	672.751	29.8179	983.553	567.832	278.582	653.055	663.959	281.208	744.304	389.531	208.082	752.713	408.631	224.535	768.035	306.951	211.586	731.763	205.233	-202.3	650.336	645.079	-184.724	741.567	373.561	-118.777	756.229	398.974	-127.964	766.773	298.289	-100.106	731.516	194.486
531	5.3	48.053	1195.07	471.856	120.291	1196.79	513.686	-24.9321	1196.93	513.874	218.423	1037.04	645.287	-129.065	1036.84	672.786	29.914	983.688	567.668	278.544	653.069	663.949	281.264	744.366	389.551	208.171	752.781	408.615	224.566	768.025	306.971	211.639	731.829	205.252	-202.32	650.373	645.146	-184.661	741.624	373.54	-118.685	756.284	398.912	-127.876	766.878	298.213	-100.058	731.566	194.472
532	5.31	48.1085	1195.16	471.735	120.332	1196.85	513.654	-24.8795	1196.98	513.819	218.451	1037.08	645.274	-129.049	1036.86	672.81	29.9948	983.771	567.613	278.519	653.067	663.94	281.307	744.411	389.56	208.227	752.823	408.618	224.592	768.022	306.956	211.683	731.866	205.276	-202.328	650.357	645.136	-184.598	741.67	373.532	-118.611	756.332	398.881	-127.813	766.947	298.173	-100.018	731.599	194.466
533	5.32	48.1017	1195.23	471.653	120.326	1196.88	513.621	-24.8814	1197.01	513.755	218.448	1037.1	645.273	-129.067	1036.88	672.783	29.995	983.825	567.525	278.529	653.08	663.958	281.306	744.45	389.539	208.217	752.861	408.578	224.599	768.051	306.937	211.692	731.885	205.252	-202.323	650.335	645.106	-184.589	741.698	373.495	-118.622	756.376	398.855	-127.802	766.973	298.139	-100.004	731.6	194.449
534	5.33	48.0307	1195.24	471.639	120.266	1196.88	513.612	-24.9168	1197	513.774	218.406	1037.1	645.291	-129.104	1036.87	672.769	29.9158	983.831	567.543	278.542	653.104	664.008	281.262	744.471	389.545	208.147	752.89	408.521	224.563	768.104	306.905	211.664	731.874	205.222	-202.312	650.301	645.069	-184.622	741.669	373.489	-118.686	756.374	398.86	-127.841	766.915	298.181	-100.031	731.597	194.46
535	5.34	47.9407	1195.15	471.754	120.201	1196.83	513.639	-24.9915	1196.94	513.874	218.344	1037.08	645.308	-129.138	1036.85	672.767	29.7993	983.754	567.657	278.548	653.124	664.016	281.196	744.454	389.538	208.082	752.86	408.565	224.538	768.161	306.916	211.609	731.824	205.218	-202.3	650.295	645.067	-184.697	741.627	373.532	-118.759	756.322	398.927	-127.912	766.827	298.282	-100.087	731.567	194.493
536	5.35	47.8687	1195.05	471.887	120.163	1196.77	513.664	-25.0394	1196.89	513.961	218.307	1037.03	645.319	-129.168	1036.81	672.775	29.7086	983.626	567.811	278.549	653.121	663.995	281.144	744.384	389.511	208.023	752.772	408.596	224.527	768.173	306.88	211.556	731.756	205.222	-202.286	650.272	645.034	-184.745	741.574	373.577	-118.813	756.256	398.965	-127.977	766.734	298.345	-100.134	731.491	194.533
537	5.36	47.8454	1194.96	472.034	120.159	1196.71	513.721	-25.0628	1196.86	513.959	218.3	1036.99	645.328	-129.171	1036.77	672.762	29.6949	983.528	567.956	278.556	653.119	664.019	281.155	744.312	389.538	208.017	752.692	408.622	224.537	768.12	306.889	211.551	731.707	205.243	-202.287	650.248	644.992	-184.761	741.529	373.586	-118.824	756.197	398.992	-128.006	766.68	298.358	-100.148	731.452	194.528
538	5.37	47.8943	1194.93	472.109	120.179	1196.71	513.726	-25.0404	1196.84	513.926	218.309	1036.99	645.328	-129.141	1036.77	672.781	29.7442	983.492	568.03	278.548	653.107	664.028	281.207	744.295	389.573	208.062	752.697	408.629	224.541	768.058	306.93	211.581	731.721	205.274	-202.294	650.249	645.006	-184.744	741.513	373.622	-118.794	756.182	399.035	-127.985	766.727	298.343	-100.13	731.477	194.537
539	5.38	47.9658	1194.98	472.006	120.244	1196.74	513.698	-24.9755	1196.88	513.867	218.357	1037.02	645.31	-129.101	1036.79	672.792	29.8566	983.547	567.974	278.51	653.096	663.995	281.252	744.329	389.584	208.123	752.739	408.61	224.565	768.018	306.962	211.648	731.771	205.306	-202.322	650.285	645.056	-184.687	741.558	373.611	-118.714	756.206	398.974	-127.919	766.827	298.29	-100.08	731.519	194.5
540	5.39	48.0622	1195.07	471.845	120.328	1196.78	513.698	-24.8971	1196.93	513.813	218.415	1037.05	645.274	-129.057	1036.82	672.772	29.9703	983.667	567.784	278.504	653.126	664.007	281.3	744.369	389.576	208.187	752.774	408.603	224.587	767.99	306.948	211.697	731.822	205.294	-202.36	650.341	645.128	-184.608	741.617	373.56	-118.625	756.265	398.87	-127.847	766.906	298.209	-100.024	731.55	194.46
541	5.4	48.1294	1195.15	471.669	120.362	1196.83	513.685	-24.8535	1196.98	513.731	218.44	1037.08	645.245	-129.043	1036.86	672.748	29.9994	983.769	567.596	278.501	653.155	664.028	281.306	744.407	389.557	208.218	752.824	408.588	224.604	767.999	306.927	211.707	731.874	205.258	-202.387	650.376	645.157	-184.59	741.675	373.523	-118.598	756.329	398.814	-127.811	766.961	298.168	-99.9989	731.586	194.399
542	5.41	48.0989	1195.2	471.564	120.316	1196.85	513.62	-24.8902	1196.98	513.716	218.409	1037.09	645.258	-129.088	1036.87	672.715	29.9512	983.832	567.49	278.476	653.144	664.003	281.263	744.443	389.534	208.191	752.854	408.563	224.583	768.059	306.915	211.672	731.892	205.203	-202.409	650.389	645.188	-184.622	741.677	373.492	-118.647	756.354	398.809	-127.827	766.934	298.17	-100.012	731.589	194.417
543	5.42	48.0129	1195.17	471.594	120.243	1196.83	513.588	-24.9451	1196.94	513.749	218.341	1037.09	645.262	-129.138	1036.87	672.682	29.8469	983.837	567.459	278.466	653.101	663.972	281.181	744.468	389.483	208.099	752.856	408.538	224.527	768.138	306.854	211.612	731.843	205.165	-202.425	650.376	645.204	-184.691	741.64	373.531	-118.743	756.339	398.847	-127.882	766.838	298.228	-100.064	731.555	194.466
544	5.43	47.9313	1195.13	471.682	120.182	1196.81	513.556	-24.995	1196.92	513.824	218.287	1037.08	645.274	-129.162	1036.85	672.67	29.732	983.796	567.565	278.487	653.077	663.98	281.102	744.453	389.459	208.027	752.817	408.533	224.491	768.191	306.856	211.555	731.782	205.16	-202.398	650.331	645.136	-184.757	741.599	373.579	-118.827	756.318	398.895	-127.949	766.747	298.286	-100.139	731.533	194.504
545	5.44	47.8943	1195.09	471.767	120.151	1196.77	513.583	-25.0343	1196.91	513.85	218.268	1037.05	645.272	-129.182	1036.83	672.671	29.6755	983.723	567.696	278.505	653.076	663.982	281.075	744.408	389.476	207.984	752.772	408.548	224.48	768.207	306.851	211.524	731.748	205.145	-202.361	650.312	645.074	-184.81	741.583	373.596	-118.873	756.29	398.946	-128.004	766.709	298.331	-100.186	731.521	194.518
546	5.45	47.9231	1195.04	471.844	120.177	1196.75	513.626	-25.0215	1196.9	513.818	218.295	1037.04	645.283	-129.156	1036.82	672.671	29.7072	983.645	567.799	278.519	653.095	663.986	281.12	744.362	389.534	207.987	752.742	408.577	224.493	768.156	306.857	211.543	731.742	205.177	-202.357	650.298	645.038	-184.794	741.577	373.604	-118.856	756.261	398.984	-128.007	766.728	298.34	-100.163	731.518	194.517
547	5.46	48.0356	1194.98	471.883	120.27	1196.72	513.665	-24.953	1196.9	513.769	218.369	1037.04	645.274	-129.082	1036.81	672.668	29.8569	983.596	567.851	278.528	653.101	663.989	281.227	744.325	389.585	208.093	752.732	408.626	224.555	768.064	306.925	211.618	731.766	205.256	-202.339	650.31	645.062	-184.716	741.585	373.583	-118.769	756.243	398.948	-127.952	766.798	298.267	-100.107	731.532	194.501
548	5.47	48.1802	1195	471.778	120.401	1196.7	513.726	-24.8537	1196.91	513.727	218.454	1037.06	645.273	-129.017	1036.82	672.684	30.037	983.633	567.796	278.532	653.103	664.011	281.334	744.33	389.617	208.226	752.739	408.693	224.628	767.969	306.989	211.706	731.782	205.31	-202.331	650.347	645.108	-184.627	741.615	373.567	-118.646	756.247	398.877	-127.863	766.887	298.187	-100.031	731.546	194.462
549	5.48	48.2678	1195.03	471.719	120.474	1196.71	513.757	-24.7719	1196.93	513.67	218.491	1037.08	645.259	-128.987	1036.85	672.675	30.1405	983.671	567.741	278.52	653.122	664.023	281.376	744.35	389.625	208.289	752.74	408.718	224.656	767.932	307.002	211.746	731.818	205.327	-202.356	650.382	645.125	-184.563	741.638	373.535	-118.572	756.278	398.841	-127.797	766.951	298.142	-99.9834	731.567	194.389
550	5.49	48.2843	1195.03	471.756	120.47	1196.74	513.725	-24.7579	1196.92	513.658	218.49	1037.08	645.241	-128.983	1036.86	672.681	30.1385	983.703	567.724	278.497	653.115	663.984	281.357	744.372	389.606	208.267	752.756	408.669	224.662	767.975	306.97	211.722	731.852	205.311	-202.397	650.424	645.157	-184.565	741.654	373.514	-118.58	756.296	398.829	-127.803	766.965	298.114	-99.985	731.578	194.381
551	5.5	48.212	1195.01	471.684	120.4	1196.76	513.65	-24.8107	1196.91	513.681	218.457	1037.06	645.244	-129.014	1036.87	672.664	30.0319	983.725	567.677	278.492	653.122	663.982	281.283	744.395	389.559	208.17	752.783	408.574	224.622	768.029	306.91	211.655	731.842	205.237	-202.421	650.47	645.227	-184.64	741.651	373.49	-118.675	756.296	398.879	-127.85	766.886	298.153	-100.039	731.587	194.405
552	5.51	48.0754	1195.02	471.65	120.3	1196.74	513.58	-24.8897	1196.88	513.73	218.393	1037.05	645.253	-129.067	1036.86	672.618	29.8815	983.728	567.645	278.511	653.119	663.994	281.172	744.4	389.5	208.045	752.783	408.518	224.544	768.121	306.862	211.576	731.804	205.16	-202.404	650.455	645.225	-184.732	741.602	373.498	-118.787	756.296	398.892	-127.92	766.774	298.242	-100.099	731.559	194.428
553	5.52	48.003	1195.03	471.637	120.229	1196.74	513.527	-24.9331	1196.86	513.781	218.329	1037.03	645.235	-129.1	1036.87	672.628	29.7552	983.77	567.57	278.524	653.08	663.979	281.082	744.412	389.451	207.98	752.782	408.529	224.493	768.211	306.851	211.522	731.763	205.137	-202.388	650.409	645.167	-184.814	741.585	373.526	-118.876	756.299	398.916	-127.981	766.704	298.303	-100.165	731.53	194.471
554	5.53	48.0148	1195.08	471.621	120.238	1196.78	513.518	-24.9401	1196.86	513.812	218.345	1037.04	645.267	-129.091	1036.9	672.652	29.7476	983.819	567.551	278.552	653.063	663.983	281.082	744.435	389.48	207.995	752.804	408.565	224.47	768.242	306.871	211.52	731.768	205.166	-202.365	650.362	645.093	-184.817	741.605	373.542	-118.889	756.312	398.957	-128.001	766.712	298.332	-100.196	731.533	194.475
555	5.54	48.1088	1195.1	471.601	120.318	1196.8	513.554	-24.8757	1196.9	513.793	218.429	1037.03	645.276	-129.022	1036.9	672.682	29.8648	983.843	567.544	278.571	653.045	663.995	281.183	744.422	389.548	208.067	752.829	408.584	224.5	768.182	306.916	211.58	731.801	205.21	-202.331	650.338	645.036	-184.746	741.638	373.521	-118.813	756.321	398.931	-127.945	766.793	298.303	-100.143	731.558	194.483
556	5.55	48.2881	1195.08	471.59	120.441	1196.76	513.6	-24.746	1196.91	513.737	218.522	1037.02	645.243	-128.947	1036.9	672.717	30.0571	983.789	567.601	278.584	653.049	664	281.319	744.374	389.621	208.2	752.802	408.655	224.58	768.067	306.953	211.676	731.833	205.25	-202.302	650.344	645.03	-184.641	741.641	373.514	-118.693	756.296	398.869	-127.858	766.873	298.218	-100.051	731.553	194.466
557	5.56	48.424	1195.04	471.59	120.551	1196.68	513.69	-24.6236	1196.89	513.704	218.584	1037	645.229	-128.894	1036.88	672.736	30.1863	983.716	567.705	278.572	653.043	664	281.388	744.337	389.65	208.295	752.738	408.766	224.653	767.974	307.021	211.758	731.812	205.302	-202.306	650.357	645.075	-184.556	741.631	373.529	-118.596	756.274	398.833	-127.799	766.903	298.155	-99.9914	731.545	194.445
558	5.57	48.4412	1195	471.641	120.588	1196.63	513.744	-24.5972	1196.87	513.719	218.586	1036.98	645.248	-128.874	1036.86	672.737	30.2054	983.663	567.785	278.547	653.02	663.974	281.387	744.312	389.647	208.306	752.695	408.78	224.669	767.945	307.047	211.752	731.801	205.303	-202.339	650.392	645.153	-184.557	741.611	373.516	-118.59	756.244	398.861	-127.799	766.91	298.133	-99.9852	731.527	194.46
559	5.58	48.38	1194.94	471.751	120.545	1196.6	513.741	-24.6542	1196.84	513.76	218.55	1036.95	645.256	-128.896	1036.85	672.71	30.1356	983.601	567.846	278.521	653.004	663.953	281.321	744.289	389.606	208.243	752.682	408.743	224.638	767.96	307.005	211.687	731.776	205.289	-202.365	650.445	645.21	-184.623	741.578	373.537	-118.662	756.2	398.932	-127.862	766.85	298.171	-100.027	731.505	194.462
560	5.59	48.2953	1194.88	471.841	120.474	1196.59	513.722	-24.7265	1196.83	513.826	218.515	1036.92	645.287	-128.928	1036.85	672.692	30.0237	983.549	567.937	278.506	653.013	663.94	281.231	744.273	389.563	208.131	752.659	408.704	224.596	768.012	306.974	211.602	731.751	205.271	-202.381	650.507	645.256	-184.693	741.552	373.594	-118.742	756.17	399.012	-127.943	766.754	298.275	-100.079	731.485	194.508
561	5.6	48.2518	1194.93	471.806	120.432	1196.62	513.677	-24.7575	1196.85	513.832	218.497	1036.93	645.29	-128.959	1036.87	672.672	29.9381	983.6	567.9	278.496	653.022	663.942	281.157	744.303	389.548	208.048	752.681	408.648	224.547	768.116	306.936	211.538	731.752	205.208	-202.402	650.528	645.259	-184.747	741.559	373.596	-118.801	756.199	399.015	-127.98	766.721	298.322	-100.13	731.475	194.525
562	5.61	48.2644	1195.04	471.616	120.423	1196.68	513.601	-24.741	1196.9	513.773	218.484	1036.96	645.263	-128.973	1036.91	672.633	29.9118	983.773	567.601	278.503	653.013	663.948	281.138	744.37	389.502	208.033	752.758	408.589	224.504	768.182	306.874	211.537	731.774	205.17	-202.404	650.5	645.203	-184.761	741.604	373.542	-118.827	756.264	398.942	-127.97	766.74	298.307	-100.15	731.508	194.483
563	5.62	48.3543	1195.15	471.431	120.462	1196.77	513.549	-24.6837	1196.96	513.705	218.517	1037	645.245	-128.949	1036.96	672.603	29.9653	983.951	567.32	278.505	652.974	663.924	281.161	744.442	389.454	208.076	752.869	408.526	224.502	768.205	306.829	211.585	731.813	205.144	-202.396	650.478	645.168	-184.729	741.65	373.495	-118.792	756.335	398.856	-127.899	766.794	298.239	-100.124	731.551	194.428
564	5.63	48.4624	1195.23	471.357	120.539	1196.83	513.582	-24.5894	1197.01	513.661	218.577	1037.03	645.263	-128.895	1036.99	672.626	30.0763	984.05	567.226	278.497	652.938	663.902	281.242	744.465	389.534	208.123	752.932	408.514	224.52	768.187	306.854	211.648	731.861	205.207	-202.376	650.449	645.125	-184.669	741.702	373.489	-118.714	756.399	398.828	-127.835	766.889	298.205	-100.074	731.592	194.431
565	5.64	48.5441	1195.23	471.424	120.627	1196.82	513.646	-24.506	1197.03	513.666	218.623	1037.03	645.288	-128.849	1037	672.685	30.1744	984.004	567.348	278.494	652.955	663.931	281.315	744.435	389.598	208.164	752.911	408.516	224.56	768.132	306.921	211.705	731.886	205.271	-202.371	650.427	645.064	-184.619	741.723	373.502	-118.658	756.409	398.824	-127.81	766.94	298.2	-100.048	731.608	194.433
566	5.65	48.6051	1195.09	471.627	120.71	1196.73	513.739	-24.4698	1196.99	513.679	218.648	1036.99	645.282	-128.821	1036.95	672.669	30.24	983.836	567.588	278.51	652.976	663.945	281.348	744.366	389.613	208.218	752.825	408.588	224.631	768.039	306.988	211.729	731.853	205.285	-202.383	650.442	645.06	-184.605	741.683	373.531	-118.625	756.311	398.845	-127.809	766.928	298.155	-100.022	731.577	194.44
567	5.66	48.6146	1194.91	471.855	120.737	1196.59	513.829	-24.468	1196.87	513.789	218.633	1036.92	645.274	-128.806	1036.89	672.636	30.2538	983.611	567.888	278.514	652.977	663.931	281.357	744.277	389.646	208.252	752.703	408.692	224.673	767.988	307.014	211.726	731.778	205.304	-202.412	650.479	645.129	-184.607	741.604	373.536	-118.641	756.198	398.908	-127.852	766.838	298.167	-100.03	731.51	194.47
568	5.67	48.5796	1194.81	471.985	120.708	1196.51	513.892	-24.5045	1196.8	513.844	218.59	1036.86	645.289	-128.827	1036.84	672.629	30.1769	983.47	568.057	278.484	652.97	663.924	281.295	744.21	389.626	208.22	752.616	408.764	224.66	767.97	307.001	211.67	731.72	205.283	-202.449	650.535	645.239	-184.647	741.526	373.573	-118.687	756.116	398.997	-127.914	766.744	298.234	-100.066	731.454	194.49
569	5.68	48.5219	1194.82	471.955	120.656	1196.5	513.872	-24.5332	1196.81	513.867	218.569	1036.84	645.318	-128.861	1036.82	672.62	30.0857	983.459	568.039	278.461	652.953	663.916	281.209	744.189	389.59	208.136	752.599	408.693	224.62	767.999	306.992	211.606	731.698	205.249	-202.466	650.541	645.277	-184.705	741.505	373.577	-118.744	756.105	399.031	-127.95	766.689	298.306	-100.104	731.429	194.494
570	5.69	48.5061	1194.9	471.88	120.616	1196.59	513.775	-24.5395	1196.87	513.828	218.565	1036.86	645.321	-128.875	1036.88	672.622	30.0356	983.592	567.862	278.465	652.939	663.911	281.155	744.261	389.551	208.088	752.669	408.639	224.55	768.087	306.961	211.572	731.737	205.206	-202.463	650.536	645.277	-184.731	741.549	373.561	-118.779	756.188	399.009	-127.952	766.698	298.336	-100.11	731.461	194.509
571	5.7	48.5382	1195.06	471.667	120.607	1196.72	513.652	-24.5187	1196.96	513.762	218.587	1036.93	645.317	-128.878	1036.96	672.601	30.0544	983.828	567.55	278.483	652.936	663.91	281.154	744.389	389.5	208.071	752.811	408.58	224.506	768.182	306.868	211.587	731.815	205.179	-202.437	650.534	645.23	-184.718	741.63	373.555	-118.775	756.308	398.942	-127.911	766.776	298.311	-100.096	731.536	194.488
572	5.71	48.5939	1195.2	471.429	120.644	1196.82	513.574	-24.4573	1197.04	513.678	218.628	1036.98	645.295	-128.849	1037.01	672.597	30.117	984.029	567.276	278.506	652.941	663.953	281.195	744.482	389.496	208.119	752.919	408.547	224.512	768.214	306.851	211.624	731.878	205.192	-202.4	650.504	645.174	-184.676	741.698	373.534	-118.724	756.415	398.83	-127.841	766.86	298.24	-100.067	731.591	194.452
573	5.72	48.6581	1195.29	471.252	120.704	1196.86	513.577	-24.3934	1197.07	513.607	218.668	1036.99	645.268	-128.81	1037.04	672.61	30.1962	984.084	567.153	278.514	652.923	663.991	281.26	744.5	389.514	208.167	752.949	408.52	224.541	768.19	306.874	211.677	731.898	205.212	-202.355	650.425	645.069	-184.606	741.735	373.497	-118.665	756.456	398.797	-127.784	766.919	298.179	-100.045	731.612	194.436
574	5.73	48.6947	1195.24	471.284	120.753	1196.8	513.601	-24.3789	1197.05	513.595	218.695	1036.95	645.274	-128.777	1037.01	672.607	30.2463	983.98	567.29	278.52	652.87	663.956	281.319	744.432	389.588	208.197	752.899	408.553	224.574	768.126	306.924	211.713	731.884	205.251	-202.342	650.387	645.015	-184.595	741.725	373.479	-118.645	756.412	398.842	-127.773	766.935	298.181	-100.03	731.594	194.462
575	5.74	48.6756	1195.09	471.513	120.764	1196.67	513.656	-24.3954	1196.94	513.686	218.683	1036.89	645.281	-128.77	1036.96	672.611	30.2583	983.777	567.586	278.52	652.838	663.895	281.341	744.328	389.65	208.204	752.79	408.622	224.611	768.049	306.967	211.712	731.833	205.286	-202.361	650.411	645.043	-184.616	741.648	373.525	-118.672	756.274	398.938	-127.819	766.871	298.243	-100.04	731.54	194.478
576	5.75	48.6511	1194.87	471.763	120.756	1196.51	513.731	-24.4182	1196.8	513.813	218.652	1036.82	645.261	-128.797	1036.92	672.58	30.2345	983.548	567.907	278.498	652.837	663.865	281.326	744.211	389.67	208.176	752.655	408.673	224.628	767.994	306.965	211.689	731.758	205.299	-202.389	650.479	645.086	-184.649	741.567	373.567	-118.71	756.145	398.996	-127.902	766.774	298.311	-100.057	731.469	194.511
577	5.76	48.6425	1194.73	471.894	120.736	1196.39	513.757	-24.4334	1196.73	513.854	218.627	1036.78	645.264	-128.817	1036.89	672.548	30.1794	983.391	568.07	278.477	652.849	663.869	281.279	744.144	389.667	208.155	752.553	408.738	224.649	767.961	307.013	211.647	731.703	205.284	-202.436	650.553	645.167	-184.687	741.507	373.592	-118.733	756.09	399.02	-127.952	766.691	298.335	-100.092	731.42	194.502
578	5.77	48.6253	1194.71	471.875	120.718	1196.41	513.703	-24.4447	1196.75	513.816	218.612	1036.77	645.266	-128.819	1036.9	672.52	30.135	983.403	568.016	278.459	652.851	663.864	281.239	744.159	389.615	208.129	752.553	408.751	224.634	767.983	306.997	211.616	731.7	205.257	-202.476	650.59	645.214	-184.705	741.513	373.578	-118.749	756.099	399.027	-127.958	766.664	298.328	-100.106	731.428	194.489
579	5.78	48.6329	1194.79	471.734	120.719	1196.47	513.618	-24.4323	1196.81	513.701	218.613	1036.8	645.261	-128.818	1036.94	672.505	30.1336	983.561	567.8	278.457	652.843	663.864	281.23	744.235	389.582	208.112	752.67	408.659	224.601	768.041	306.949	211.622	731.753	205.225	-202.523	650.629	645.3	-184.689	741.568	373.531	-118.756	756.183	398.978	-127.929	766.719	298.296	-100.1	731.476	194.475
580	5.79	48.688	1194.92	471.533	120.744	1196.58	513.538	-24.3821	1196.92	513.575	218.64	1036.87	645.252	-128.817	1037.01	672.504	30.1505	983.78	567.49	278.461	652.846	663.903	281.239	744.348	389.588	208.148	752.812	408.613	224.572	768.111	306.906	211.641	731.825	205.227	-202.549	650.626	645.31	-184.666	741.642	373.504	-118.723	756.302	398.901	-127.866	766.822	298.232	-100.082	731.537	194.446
581	5.8	48.7537	1195.05	471.301	120.797	1196.67	513.486	-24.3302	1197.01	513.475	218.656	1036.94	645.257	-128.808	1037.1	672.508	30.1968	983.964	567.264	278.476	652.871	663.946	281.255	744.449	389.571	208.175	752.902	408.583	224.548	768.157	306.891	211.665	731.889	205.226	-202.529	650.609	645.26	-184.641	741.727	373.479	-118.701	756.42	398.833	-127.81	766.912	298.185	-100.05	731.603	194.429
582	5.81	48.7774	1195.08	471.236	120.822	1196.68	513.451	-24.2916	1197.02	513.447	218.653	1036.95	645.229	-128.802	1037.13	672.491	30.219	984.017	567.181	278.495	652.874	663.94	281.286	744.474	389.559	208.162	752.943	408.516	224.547	768.167	306.892	211.689	731.912	205.217	-202.497	650.582	645.199	-184.619	741.766	373.468	-118.682	756.462	398.795	-127.78	766.959	298.162	-100.017	731.617	194.455
583	5.82	48.7748	1195.02	471.28	120.824	1196.62	513.456	-24.2983	1196.96	513.444	218.641	1036.91	645.202	-128.823	1037.09	672.46	30.2267	983.934	567.268	278.487	652.886	663.939	281.307	744.43	389.569	208.174	752.901	408.524	224.567	768.156	306.885	211.699	731.891	205.22	-202.505	650.551	645.151	-184.628	741.728	373.472	-118.684	756.412	398.836	-127.8	766.933	298.157	-100.017	731.597	194.451
584	5.83	48.7427	1194.88	471.422	120.799	1196.5	513.502	-24.348	1196.85	513.495	218.602	1036.84	645.213	-128.844	1037.03	672.469	30.1784	983.755	567.443	278.458	652.885	663.954	281.287	744.336	389.602	208.169	752.797	408.592	224.584	768.098	306.901	211.663	731.834	205.232	-202.535	650.526	645.161	-184.672	741.637	373.542	-118.723	756.304	398.9	-127.857	766.853	298.202	-100.057	731.539	194.444
585	5.84	48.689	1194.73	471.572	120.761	1196.38	513.563	-24.3982	1196.75	513.556	218.551	1036.79	645.221	-128.88	1036.96	672.449	30.1093	983.527	567.696	278.448	652.87	663.961	281.238	744.251	389.639	208.118	752.691	408.634	224.591	768.065	306.937	211.62	731.762	205.279	-202.572	650.512	645.187	-184.72	741.564	373.597	-118.763	756.178	399.003	-127.933	766.754	298.28	-100.103	731.476	194.495
586	5.85	48.6575	1194.65	471.592	120.741	1196.32	513.56	-24.4349	1196.68	513.594	218.52	1036.76	645.228	-128.904	1036.91	672.394	30.0696	983.382	567.816	278.454	652.878	663.945	281.212	744.204	389.633	208.109	752.62	408.683	224.593	768.042	306.946	211.589	731.723	205.277	-202.582	650.508	645.202	-184.739	741.522	373.594	-118.778	756.113	399.053	-127.974	766.699	298.312	-100.12	731.443	194.523
587	5.86	48.6604	1194.63	471.563	120.753	1196.32	513.505	-24.4183	1196.67	513.546	218.518	1036.78	645.195	-128.907	1036.9	672.315	30.0736	983.365	567.786	278.441	652.894	663.919	281.219	744.208	389.598	208.122	752.64	408.653	224.603	768.031	306.925	211.591	731.748	205.241	-202.574	650.488	645.156	-184.734	741.528	373.549	-118.776	756.124	399.026	-127.951	766.69	298.328	-100.112	731.443	194.501
588	5.87	48.6842	1194.69	471.453	120.781	1196.37	513.517	-24.392	1196.69	513.444	218.53	1036.83	645.154	-128.915	1036.91	672.277	30.127	983.479	567.611	278.426	652.918	663.934	281.249	744.265	389.574	208.152	752.715	408.643	224.607	768.031	306.932	211.62	731.805	205.231	-202.576	650.486	645.157	-184.7	741.569	373.504	-118.745	756.189	398.973	-127.895	766.754	298.287	-100.082	731.485	194.472
589	5.88	48.7209	1194.77	471.28	120.816	1196.43	513.499	-24.3682	1196.72	513.377	218.558	1036.89	645.149	-128.918	1036.94	672.289	30.2116	983.606	567.451	278.419	652.957	663.967	281.288	744.331	389.584	208.193	752.782	408.65	224.603	768.027	306.951	211.653	731.864	205.232	-202.579	650.456	645.149	-184.646	741.64	373.515	-118.701	756.277	398.903	-127.838	766.843	298.239	-100.048	731.536	194.468
590	5.89	48.7508	1194.81	471.134	120.812	1196.49	513.426	-24.376	1196.74	513.298	218.578	1036.93	645.156	-128.897	1036.94	672.247	30.2489	983.687	567.328	278.425	652.965	663.975	281.306	744.372	389.581	208.192	752.827	408.601	224.61	768.043	306.95	211.675	731.894	205.256	-202.587	650.419	645.121	-184.621	741.682	373.542	-118.659	756.348	398.866	-127.805	766.9	298.217	-100.032	731.566	194.443
591	5.9	48.7262	1194.8	471.1	120.781	1196.52	513.352	-24.4127	1196.73	513.225	218.578	1036.93	645.123	-128.909	1036.92	672.186	30.2285	983.712	567.199	278.436	652.935	663.937	281.307	744.384	389.582	208.193	752.851	408.585	224.61	768.064	306.942	211.678	731.892	205.268	-202.594	650.378	645.097	-184.642	741.672	373.538	-118.667	756.352	398.861	-127.818	766.915	298.227	-100.036	731.568	194.457
592	5.91	48.6446	1194.73	471.102	120.699	1196.51	513.274	-24.4879	1196.67	513.228	218.552	1036.9	645.109	-128.927	1036.91	672.164	30.1691	983.637	567.253	278.463	652.933	663.931	281.283	744.379	389.581	208.169	752.822	408.621	224.598	768.082	306.937	211.655	731.857	205.268	-202.588	650.363	645.076	-184.665	741.637	373.548	-118.72	756.291	398.918	-127.843	766.869	298.25	-100.054	731.552	194.483
593	5.92	48.5354	1194.64	471.105	120.605	1196.45	513.233	-24.5542	1196.61	513.262	218.511	1036.87	645.099	-128.968	1036.92	672.14	30.0865	983.556	567.312	278.5	652.93	663.941	281.236	744.358	389.557	208.13	752.771	408.641	224.559	768.11	306.912	211.622	731.81	205.239	-202.557	650.388	645.082	-184.702	741.597	373.57	-118.776	756.24	398.967	-127.882	766.772	298.302	-100.078	731.513	194.495
594	5.93	48.4594	1194.56	471.127	120.557	1196.39	513.16	-24.5988	1196.56	513.265	218.483	1036.82	645.068	-128.997	1036.92	672.112	30.032	983.489	567.33	278.528	652.9	663.911	281.211	744.314	389.542	208.099	752.741	408.626	224.539	768.115	306.871	211.593	731.771	205.229	-202.523	650.396	645.113	-184.716	741.563	373.569	-118.801	756.231	398.937	-127.916	766.71	298.328	-100.115	731.483	194.499
595	5.94	48.431	1194.51	471.088	120.539	1196.33	513.074	-24.6078	1196.52	513.233	218.485	1036.79	645.027	-129.017	1036.93	672.082	30.0299	983.443	567.398	278.537	652.828	663.858	281.239	744.274	389.57	208.085	752.718	408.603	224.574	768.077	306.912	211.595	731.757	205.237	-202.511	650.365	645.103	-184.696	741.55	373.564	-118.78	756.213	398.945	-127.918	766.718	298.34	-100.117	731.472	194.502
596	5.95	48.4505	1194.48	471.091	120.587	1196.27	513.057	-24.5978	1196.51	513.181	218.503	1036.78	644.984	-129.01	1036.93	672.066	30.0861	983.426	567.45	278.539	652.845	663.9	281.292	744.25	389.622	208.156	752.716	408.657	224.636	768.039	306.966	211.644	731.767	205.283	-202.506	650.381	645.128	-184.648	741.565	373.57	-118.728	756.197	398.98	-127.874	766.769	298.304	-100.079	731.493	194.499
597	5.96	48.5024	1194.48	470.995	120.658	1196.23	513.029	-24.5484	1196.53	513.084	218.529	1036.82	644.936	-128.986	1036.96	672.058	30.1539	983.458	567.379	278.523	652.87	663.899	281.348	744.258	389.65	208.235	752.729	408.671	224.656	768.01	306.999	211.691	731.807	205.301	-202.498	650.434	645.163	-184.592	741.598	373.557	-118.662	756.215	398.972	-127.81	766.832	298.249	-100.025	731.522	194.484
598	5.97	48.5319	1194.49	470.853	120.701	1196.23	512.924	-24.5077	1196.54	512.977	218.532	1036.86	644.871	-128.983	1036.99	671.997	30.1566	983.506	567.25	278.497	652.879	663.851	281.372	744.292	389.631	208.258	752.753	408.69	224.655	767.994	307.012	211.71	731.84	205.259	-202.509	650.48	645.19	-184.572	741.643	373.533	-118.622	756.241	398.919	-127.78	766.887	298.187	-100.004	731.545	194.451
599	5.98	48.4949	1194.46	470.74	120.697	1196.21	512.851	-24.5139	1196.52	512.919	218.502	1036.87	644.81	-129.005	1037	671.954	30.1147	983.511	567.185	278.473	652.919	663.861	281.358	744.31	389.625	208.251	752.766	408.703	224.646	767.989	307.034	211.708	731.857	205.25	-202.54	650.515	645.212	-184.6	741.658	373.531	-118.621	756.248	398.878	-127.805	766.909	298.173	-100.026	731.566	194.464
600	5.99	48.4432	1194.43	470.67	120.643	1196.18	512.768	-24.5602	1196.52	512.86	218.445	1036.88	644.786	-129.058	1037.02	671.956	30.0441	983.484	567.203	278.438	652.94	663.893	281.303	744.328	389.605	208.203	752.785	408.677	224.592	768.039	306.982	211.671	731.858	205.268	-202.554	650.502	645.224	-184.665	741.649	373.545	-118.674	756.258	398.898	-127.851	766.9	298.181	-100.065	731.566	194.496
601	6	48.4035	1194.41	470.597	120.567	1196.16	512.637	-24.6056	1196.52	512.846	218.387	1036.86	644.771	-129.114	1037.01	671.926	29.9512	983.478	567.113	278.404	652.915	663.894	281.221	744.339	389.548	208.122	752.805	408.61	224.535	768.114	306.886	211.608	731.828	205.219	-202.592	650.474	645.242	-184.72	741.621	373.526	-118.755	756.281	398.907	-127.902	766.86	298.228	-100.104	731.55	194.498
602	6.01	48.3528	1194.37	470.494	120.527	1196.14	512.556	-24.623	1196.49	512.824	218.35	1036.85	644.765	-129.141	1037	671.855	29.8837	983.459	567.038	278.42	652.898	663.888	281.169	744.329	389.506	208.055	752.814	408.545	224.522	768.166	306.822	211.581	731.795	205.192	-202.62	650.445	645.224	-184.737	741.611	373.49	-118.813	756.281	398.917	-127.921	766.799	298.259	-100.127	731.527	194.471
603	6.02	48.387	1194.31	470.495	120.536	1196.1	512.527	-24.6107	1196.44	512.771	218.349	1036.85	644.768	-129.157	1037.01	671.805	29.883	983.444	567.031	278.465	652.916	663.898	281.165	744.341	389.503	208.045	752.809	408.541	224.533	768.175	306.832	211.592	731.775	205.183	-202.623	650.407	645.113	-184.728	741.61	373.484	-118.83	756.264	398.954	-127.909	766.769	298.245	-100.123	731.515	194.486
604	6.03	48.4286	1194.3	470.46	120.559	1196.06	512.549	-24.5768	1196.4	512.739	218.36	1036.84	644.739	-129.163	1037	671.774	29.9142	983.417	567.058	278.49	652.937	663.92	281.197	744.36	389.514	208.069	752.815	408.575	224.537	768.151	306.891	211.619	731.797	205.192	-202.652	650.387	645.038	-184.723	741.61	373.477	-118.814	756.262	398.938	-127.895	766.774	298.234	-100.114	731.515	194.489
605	6.04	48.4674	1194.28	470.392	120.62	1196.05	512.565	-24.556	1196.37	512.712	218.377	1036.83	644.734	-129.162	1036.99	671.752	29.9609	983.404	567.061	278.472	652.931	663.929	281.236	744.365	389.566	208.128	752.818	408.616	224.543	768.105	306.936	211.637	731.823	205.223	-202.716	650.377	645.038	-184.713	741.615	373.527	-118.775	756.259	398.91	-127.886	766.817	298.242	-100.107	731.525	194.488
606	6.05	48.5388	1194.24	470.408	120.706	1196.03	512.618	-24.5023	1196.33	512.67	218.407	1036.82	644.736	-129.145	1036.99	671.761	30.0231	983.409	567.086	278.45	652.896	663.889	281.282	744.356	389.609	208.191	752.805	408.653	224.573	768.051	306.961	211.659	731.849	205.24	-202.783	650.379	645.085	-184.691	741.636	373.553	-118.72	756.271	398.915	-127.846	766.882	298.239	-100.082	731.541	194.502
607	6.06	48.592	1194.21	470.427	120.764	1196.02	512.648	-24.4432	1196.29	512.641	218.414	1036.83	644.745	-129.141	1036.99	671.742	30.0569	983.412	567.102	278.439	652.87	663.879	281.314	744.337	389.621	208.24	752.797	408.695	224.616	768.019	307.001	211.68	731.856	205.265	-202.835	650.404	645.159	-184.654	741.647	373.559	-118.691	756.269	398.914	-127.815	766.918	298.218	-100.049	731.544	194.511
608	6.07	48.5917	1194.18	470.378	120.747	1195.98	512.605	-24.4413	1196.25	512.596	218.399	1036.81	644.731	-129.147	1036.99	671.692	30.0498	983.41	567.101	278.446	652.901	663.91	281.322	744.317	389.626	208.248	752.799	408.696	224.635	768.034	306.997	211.672	731.847	205.264	-202.869	650.439	645.193	-184.651	741.65	373.529	-118.697	756.25	398.898	-127.807	766.896	298.207	-100.043	731.552	194.478
609	6.08	48.5365	1194.12	470.359	120.681	1195.93	512.561	-24.4891	1196.21	512.609	218.362	1036.8	644.737	-129.176	1036.99	671.662	29.9919	983.381	567.09	278.463	652.924	663.923	281.29	744.299	389.601	208.199	752.792	408.677	224.62	768.037	306.957	211.65	731.824	205.229	-202.881	650.487	645.224	-184.675	741.625	373.524	-118.739	756.23	398.933	-127.825	766.834	298.229	-100.058	731.542	194.454
610	6.09	48.4455	1194.08	470.327	120.614	1195.91	512.539	-24.5516	1196.18	512.617	218.325	1036.8	644.754	-129.212	1037.01	671.679	29.9062	983.301	567.141	278.469	652.927	663.912	281.232	744.279	389.577	208.147	752.75	408.679	224.594	768.05	306.93	211.619	731.796	205.232	-202.874	650.487	645.203	-184.713	741.588	373.536	-118.783	756.186	398.985	-127.879	766.786	298.249	-100.097	731.513	194.478
611	6.1	48.4012	1194.06	470.348	120.543	1195.91	512.452	-24.6012	1196.21	512.615	218.289	1036.8	644.776	-129.251	1037.02	671.661	29.833	983.27	567.157	278.472	652.917	663.908	281.192	744.296	389.566	208.088	752.744	408.646	224.545	768.1	306.9	211.57	731.771	205.236	-202.851	650.471	645.192	-184.749	741.574	373.54	-118.829	756.195	399.01	-127.909	766.751	298.286	-100.132	731.495	194.524
612	6.11	48.38	1194.11	470.285	120.52	1195.94	512.378	-24.6109	1196.26	512.594	218.273	1036.81	644.789	-129.274	1037.05	671.647	29.838	983.337	567.071	278.467	652.891	663.907	281.185	744.33	389.544	208.051	752.784	408.568	224.518	768.142	306.891	211.569	731.772	205.241	-202.838	650.454	645.186	-184.741	741.592	373.54	-118.831	756.235	398.98	-127.907	766.785	298.269	-100.128	731.5	194.519
613	6.12	48.4017	1194.17	470.218	120.575	1195.98	512.395	-24.5821	1196.32	512.55	218.298	1036.84	644.749	-129.274	1037.07	671.631	29.8874	983.437	566.99	278.454	652.892	663.903	281.22	744.36	389.55	208.083	752.829	408.553	224.542	768.144	306.938	211.618	731.818	205.25	-202.84	650.454	645.175	-184.7	741.639	373.514	-118.78	756.293	398.938	-127.856	766.84	298.236	-100.1	731.549	194.493
614	6.13	48.4507	1194.23	470.136	120.635	1196.02	512.426	-24.5291	1196.36	512.517	218.34	1036.88	644.713	-129.256	1037.1	671.613	29.9536	983.524	566.88	278.463	652.915	663.903	281.277	744.401	389.556	208.157	752.87	408.584	224.587	768.116	306.947	211.652	731.868	205.248	-202.831	650.456	645.143	-184.665	741.692	373.494	-118.708	756.347	398.884	-127.794	766.897	298.187	-100.061	731.589	194.448
615	6.14	48.5026	1194.27	470.126	120.676	1196.02	512.457	-24.4927	1196.38	512.509	218.362	1036.9	644.71	-129.237	1037.11	671.61	30.0017	983.57	566.808	278.458	652.919	663.901	281.313	744.42	389.562	208.205	752.875	408.612	224.6	768.104	306.902	211.679	731.897	205.223	-202.831	650.463	645.132	-184.629	741.714	373.461	-118.669	756.368	398.866	-127.763	766.943	298.165	-100.032	731.601	194.435
616	6.15	48.5183	1194.25	470.249	120.684	1196.01	512.497	-24.4971	1196.37	512.527	218.35	1036.87	644.709	-129.24	1037.1	671.617	29.9933	983.542	566.834	278.447	652.927	663.93	281.306	744.395	389.603	208.225	752.859	408.647	224.601	768.095	306.915	211.679	731.888	205.237	-202.845	650.468	645.154	-184.618	741.695	373.458	-118.693	756.348	398.884	-127.771	766.935	298.157	-100.036	731.589	194.456
617	6.16	48.471	1194.17	470.396	120.646	1195.95	512.581	-24.5389	1196.3	512.621	218.306	1036.82	644.723	-129.27	1037.06	671.636	29.931	983.415	566.995	278.418	652.908	663.907	281.277	744.336	389.631	208.196	752.801	408.677	224.595	768.075	306.944	211.648	731.83	205.255	-202.878	650.482	645.221	-184.662	741.633	373.536	-118.751	756.268	398.938	-127.835	766.875	298.195	-100.065	731.545	194.49
618	6.17	48.4129	1194.08	470.486	120.612	1195.88	512.678	-24.5796	1196.23	512.662	218.265	1036.77	644.752	-129.309	1037.02	671.623	29.856	983.277	567.206	278.396	652.89	663.902	281.219	744.254	389.627	208.136	752.714	408.693	224.588	768.05	306.966	211.607	731.765	205.265	-202.904	650.473	645.232	-184.708	741.576	373.581	-118.79	756.168	398.996	-127.896	766.795	298.27	-100.112	731.481	194.499
619	6.18	48.3948	1194.05	470.587	120.602	1195.85	512.712	-24.6012	1196.21	512.711	218.248	1036.75	644.743	-129.33	1037	671.617	29.8049	983.208	567.285	278.42	652.93	663.954	281.196	744.223	389.599	208.077	752.68	408.682	224.594	768.046	306.976	211.572	731.736	205.237	-202.913	650.468	645.191	-184.738	741.551	373.561	-118.817	756.127	399.036	-127.935	766.742	298.321	-100.123	731.458	194.522
620	6.19	48.4089	1194.09	470.628	120.585	1195.9	512.722	-24.61	1196.24	512.725	218.245	1036.76	644.744	-129.337	1037.02	671.624	29.7887	983.247	567.235	278.44	652.977	663.993	281.185	744.255	389.574	208.054	752.684	408.655	224.563	768.067	306.934	211.573	731.757	205.215	-202.922	650.476	645.164	-184.755	741.556	373.541	-118.83	756.16	399.015	-127.941	766.748	298.316	-100.134	731.48	194.482
621	6.2	48.437	1194.21	470.481	120.585	1195.99	512.648	-24.6106	1196.34	512.672	218.253	1036.81	644.729	-129.336	1037.08	671.602	29.8287	983.397	567.002	278.442	652.992	663.989	281.191	744.329	389.555	208.083	752.771	408.606	224.533	768.1	306.891	211.597	731.807	205.196	-202.942	650.471	645.145	-184.731	741.61	373.495	-118.818	756.24	398.943	-127.881	766.811	298.237	-100.111	731.525	194.462
622	6.21	48.4804	1194.34	470.35	120.635	1196.09	512.591	-24.5503	1196.41	512.628	218.286	1036.86	644.725	-129.327	1037.13	671.599	29.9107	983.592	566.747	278.422	652.947	663.958	281.233	744.398	389.572	208.138	752.868	408.576	224.541	768.132	306.884	211.624	731.848	205.213	-202.968	650.463	645.147	-184.682	741.688	373.463	-118.756	756.318	398.883	-127.797	766.893	298.18	-100.063	731.563	194.475
623	6.22	48.5398	1194.42	470.314	120.681	1196.15	512.574	-24.4872	1196.44	512.593	218.322	1036.88	644.736	-129.308	1037.15	671.587	29.9711	983.703	566.648	278.411	652.895	663.92	281.265	744.428	389.588	208.187	752.91	408.6	224.562	768.14	306.899	211.655	731.877	205.225	-202.982	650.496	645.206	-184.644	741.748	373.467	-118.698	756.37	398.835	-127.746	766.941	298.153	-100.035	731.581	194.466
624	6.23	48.5598	1194.43	470.335	120.683	1196.17	512.587	-24.4831	1196.45	512.568	218.316	1036.88	644.74	-129.303	1037.17	671.571	29.9778	983.715	566.657	278.431	652.906	663.927	281.263	744.431	389.561	208.187	752.912	408.58	224.556	768.135	306.905	211.66	731.886	205.229	-203.001	650.507	645.194	-184.635	741.739	373.481	-118.699	756.365	398.831	-127.749	766.926	298.177	-100.043	731.578	194.447
625	6.24	48.5531	1194.37	470.422	120.668	1196.1	512.628	-24.4991	1196.41	512.6	218.297	1036.86	644.75	-129.324	1037.15	671.562	29.9411	983.62	566.815	278.445	652.903	663.912	281.269	744.386	389.561	208.178	752.851	408.62	224.56	768.125	306.918	211.638	731.858	205.22	-203.013	650.502	645.145	-184.661	741.682	373.49	-118.735	756.311	398.886	-127.785	766.875	298.194	-100.073	731.549	194.465
626	6.25	48.5305	1194.24	470.593	120.666	1195.99	512.703	-24.5192	1196.32	512.688	218.271	1036.8	644.767	-129.336	1037.11	671.538	29.891	983.442	567.046	278.436	652.886	663.881	281.263	744.301	389.587	208.15	752.747	408.652	224.601	768.071	306.953	211.615	731.795	205.22	-203.041	650.514	645.142	-184.702	741.609	373.504	-118.768	756.221	398.963	-127.838	766.784	298.263	-100.114	731.499	194.508
627	6.26	48.5169	1194.13	470.731	120.669	1195.9	512.767	-24.5324	1196.24	512.785	218.239	1036.75	644.78	-129.339	1037.08	671.532	29.8586	983.279	567.273	278.45	652.89	663.905	281.255	744.227	389.636	208.105	752.656	408.685	224.625	768.028	307.01	211.587	731.736	205.26	-203.054	650.536	645.155	-184.731	741.553	373.527	-118.799	756.143	399.031	-127.891	766.727	298.333	-100.135	731.457	194.534
628	6.27	48.5433	1194.06	470.85	120.699	1195.85	512.822	-24.5165	1196.21	512.81	218.236	1036.73	644.777	-129.355	1037.08	671.534	29.8504	983.24	567.362	278.445	652.902	663.918	281.252	744.201	389.671	208.09	752.622	408.705	224.631	768.016	307.02	211.585	731.711	205.304	-203.066	650.544	645.143	-184.742	741.542	373.554	-118.801	756.102	399.034	-127.912	766.727	298.341	-100.139	731.447	194.517
629	6.28	48.6067	1194.08	470.795	120.745	1195.86	512.79	-24.4736	1196.25	512.767	218.263	1036.76	644.762	-129.353	1037.11	671.499	29.8935	983.332	567.231	278.422	652.908	663.906	281.251	744.237	389.638	208.143	752.649	408.714	224.619	768.022	307.01	211.616	731.746	205.278	-203.093	650.578	645.155	-184.721	741.581	373.518	-118.771	756.121	398.973	-127.883	766.78	298.264	-100.101	731.48	194.49
630	6.29	48.663	1194.2	470.622	120.789	1195.93	512.716	-24.4011	1196.34	512.68	218.306	1036.82	644.752	-129.33	1037.18	671.467	29.9554	983.514	566.98	278.421	652.921	663.927	281.28	744.305	389.597	208.191	752.741	408.675	224.612	768.05	306.996	211.65	731.819	205.242	-203.115	650.632	645.2	-184.681	741.654	373.472	-118.73	756.222	398.93	-127.798	766.854	298.207	-100.053	731.545	194.469
631	6.3	48.7237	1194.31	470.448	120.818	1196.02	512.615	-24.345	1196.42	512.601	218.336	1036.88	644.749	-129.307	1037.25	671.468	29.9792	983.727	566.692	278.414	652.936	663.932	281.287	744.39	389.574	208.199	752.854	408.619	224.591	768.09	306.948	211.655	731.876	205.226	-203.146	650.689	645.228	-184.646	741.718	373.444	-118.711	756.34	398.849	-127.748	766.928	298.152	-100.024	731.597	194.466
632	6.31	48.7424	1194.4	470.288	120.833	1196.09	512.528	-24.3099	1196.48	512.484	218.338	1036.93	644.747	-129.307	1037.31	671.445	29.9895	983.86	566.515	278.403	652.927	663.928	281.265	744.473	389.535	208.19	752.921	408.561	224.558	768.14	306.897	211.645	731.905	205.214	-203.175	650.697	645.209	-184.636	741.762	373.394	-118.706	756.431	398.779	-127.725	766.956	298.098	-100.027	731.614	194.435
633	6.32	48.7289	1194.42	470.225	120.833	1196.1	512.472	-24.3149	1196.5	512.456	218.317	1036.92	644.748	-129.33	1037.34	671.405	29.9649	983.89	566.47	278.391	652.869	663.89	281.228	744.487	389.505	208.14	752.938	408.49	224.545	768.191	306.883	211.632	731.894	205.191	-203.204	650.671	645.148	-184.676	741.757	373.396	-118.744	756.445	398.775	-127.74	766.936	298.094	-100.044	731.598	194.408
634	6.33	48.7306	1194.32	470.365	120.83	1196.02	512.527	-24.3297	1196.42	512.487	218.289	1036.86	644.753	-129.353	1037.32	671.357	29.9048	983.77	566.637	278.39	652.859	663.866	281.203	744.422	389.52	208.092	752.893	408.533	224.549	768.181	306.859	211.607	731.837	205.181	-203.219	650.64	645.108	-184.718	741.696	373.434	-118.81	756.336	398.878	-127.796	766.852	298.165	-100.083	731.546	194.463
635	6.34	48.7411	1194.14	470.574	120.848	1195.89	512.634	-24.3307	1196.29	512.574	218.277	1036.78	644.744	-129.344	1037.28	671.327	29.8739	983.567	566.883	278.409	652.876	663.905	281.202	744.32	389.56	208.068	752.777	408.611	224.568	768.116	306.892	211.583	731.769	205.206	-203.235	650.621	645.036	-184.756	741.622	373.492	-118.84	756.209	398.976	-127.869	766.749	298.233	-100.128	731.483	194.49
636	6.35	48.7826	1194.03	470.689	120.887	1195.78	512.715	-24.2996	1196.18	512.619	218.274	1036.72	644.734	-129.333	1037.24	671.305	29.874	983.413	567.101	278.421	652.9	663.941	281.21	744.238	389.592	208.073	752.681	408.677	224.591	768.055	306.926	211.57	731.722	205.244	-203.253	650.631	645.006	-184.769	741.57	373.538	-118.847	756.131	399.026	-127.91	766.703	298.303	-100.154	731.438	194.523
637	6.36	48.8379	1193.96	470.764	120.96	1195.77	512.763	-24.2462	1196.13	512.624	218.287	1036.7	644.747	-129.323	1037.24	671.268	29.9157	983.387	567.143	278.421	652.873	663.915	281.23	744.204	389.632	208.123	752.631	408.75	224.589	768.007	306.982	211.598	731.716	205.269	-203.275	650.646	644.993	-184.743	741.557	373.559	-118.825	756.104	399.05	-127.89	766.725	298.297	-100.133	731.426	194.527
638	6.37	48.8922	1194.02	470.69	121.027	1195.81	512.752	-24.1584	1196.17	512.579	218.33	1036.74	644.755	-129.299	1037.28	671.252	30.002	983.499	567.027	278.402	652.874	663.923	281.275	744.232	389.667	208.198	752.674	408.768	224.608	767.999	307.021	211.64	731.771	205.274	-203.299	650.672	645.006	-184.69	741.598	373.544	-118.782	756.151	399.021	-127.833	766.799	298.253	-100.086	731.462	194.511
639	6.38	48.9804	1194.15	470.484	121.093	1195.86	512.642	-24.0623	1196.24	512.442	218.381	1036.81	644.743	-129.271	1037.34	671.234	30.0744	983.672	566.773	278.387	652.915	663.982	281.294	744.314	389.617	208.236	752.762	408.726	224.621	768.019	307.018	211.666	731.843	205.254	-203.326	650.708	645.013	-184.649	741.676	373.48	-118.732	756.245	398.945	-127.751	766.877	298.172	-100.042	731.525	194.448
640	6.39	49.0078	1194.23	470.305	121.148	1195.89	512.557	-24.0147	1196.31	512.307	218.394	1036.85	644.695	-129.26	1037.41	671.186	30.0782	983.808	566.56	278.36	652.921	663.944	281.283	744.393	389.549	208.227	752.834	408.628	224.593	768.068	306.932	211.665	731.883	205.198	-203.352	650.727	644.995	-184.645	741.733	373.414	-118.71	756.323	398.837	-127.712	766.923	298.083	-100.033	731.571	194.403
641	6.4	49.0047	1194.22	470.324	121.15	1195.88	512.541	-24.0302	1196.34	512.293	218.38	1036.87	644.692	-129.286	1037.45	671.144	30.0346	983.884	566.484	278.355	652.901	663.897	281.262	744.416	389.547	208.188	752.856	408.582	224.56	768.121	306.888	211.645	731.878	205.181	-203.373	650.762	645.011	-184.667	741.745	373.39	-118.745	756.35	398.84	-127.735	766.923	298.099	-100.044	731.583	194.429
642	6.41	48.9955	1194.18	470.384	121.115	1195.87	512.496	-24.0654	1196.34	512.333	218.357	1036.87	644.718	-129.303	1037.46	671.108	29.9689	983.898	566.466	278.383	652.893	663.89	281.22	744.405	389.551	208.139	752.857	408.595	224.536	768.163	306.893	211.621	731.845	205.186	-203.38	650.795	645.016	-184.708	741.729	373.396	-118.806	756.334	398.91	-127.787	766.871	298.172	-100.074	731.564	194.465
643	6.42	48.9733	1194.12	470.381	121.106	1195.82	512.481	-24.093	1196.32	512.315	218.337	1036.83	644.698	-129.323	1037.45	671.075	29.9222	983.83	566.537	278.408	652.86	663.871	281.193	744.37	389.551	208.099	752.82	408.619	224.516	768.171	306.875	211.597	731.792	205.183	-203.373	650.774	644.972	-184.748	741.686	373.419	-118.853	756.298	398.93	-127.836	766.799	298.202	-100.1	731.538	194.484
644	6.43	48.9963	1194.06	470.379	121.139	1195.76	512.506	-24.0769	1196.26	512.294	218.339	1036.8	644.688	-129.333	1037.44	671.038	29.9156	983.75	566.622	278.439	652.834	663.842	281.202	744.303	389.555	208.09	752.77	408.613	224.531	768.149	306.908	211.592	731.761	205.213	-203.378	650.734	644.897	-184.765	741.647	373.427	-118.863	756.263	398.94	-127.849	766.767	298.224	-100.115	731.506	194.48
645	6.44	49.0644	1194.02	470.43	121.206	1195.73	512.498	-24.0008	1196.21	512.273	218.377	1036.78	644.682	-129.303	1037.45	671.002	29.9738	983.739	566.676	278.463	652.829	663.841	281.249	744.274	389.582	208.135	752.736	408.621	224.572	768.116	306.922	211.625	731.771	205.223	-203.389	650.718	644.851	-184.732	741.642	373.436	-118.833	756.239	398.953	-127.817	766.774	298.217	-100.092	731.492	194.465
646	6.45	49.1358	1194	470.414	121.282	1195.75	512.487	-23.9076	1196.2	512.217	218.427	1036.79	644.665	-129.257	1037.44	670.958	30.0578	983.782	566.637	278.501	652.855	663.895	281.304	744.274	389.594	208.198	752.746	408.643	224.611	768.059	306.93	211.669	731.786	205.239	-203.397	650.735	644.828	-184.681	741.663	373.421	-118.782	756.22	398.949	-127.769	766.812	298.172	-100.058	731.501	194.444
647	6.46	49.1816	1194.02	470.324	121.337	1195.78	512.479	-23.8338	1196.2	512.184	218.454	1036.81	644.627	-129.223	1037.47	670.969	30.1175	983.828	566.576	278.502	652.885	663.93	281.325	744.29	389.608	208.235	752.769	408.664	224.623	768.028	306.95	211.693	731.819	205.267	-203.426	650.779	644.817	-184.649	741.692	373.386	-118.74	756.24	398.881	-127.74	766.871	298.087	-100.046	731.518	194.417
648	6.47	49.2246	1194.05	470.313	121.357	1195.81	512.515	-23.784	1196.2	512.209	218.464	1036.82	644.616	-129.208	1037.53	670.998	30.1401	983.863	566.586	278.486	652.895	663.918	281.329	744.32	389.618	208.253	752.783	408.681	224.635	768.016	307.014	211.69	731.847	205.286	-203.458	650.844	644.875	-184.638	741.719	373.409	-118.721	756.266	398.867	-127.742	766.914	298.091	-100.047	731.541	194.438
649	6.48	49.2484	1194.03	470.374	121.395	1195.79	512.536	-23.7743	1196.21	512.233	218.465	1036.83	644.629	-129.203	1037.55	671.007	30.1523	983.89	566.571	278.473	652.892	663.868	281.312	744.338	389.6	208.238	752.779	408.673	224.633	768.026	307.042	211.674	731.855	205.266	-203.492	650.901	644.942	-184.659	741.724	373.438	-118.73	756.27	398.913	-127.749	766.922	298.136	-100.047	731.548	194.458
650	6.49	49.2343	1194	470.38	121.394	1195.75	512.478	-23.7786	1196.2	512.21	218.449	1036.82	644.603	-129.227	1037.56	670.935	30.1132	983.894	566.545	278.461	652.897	663.83	281.261	744.338	389.524	208.193	752.772	408.648	224.61	768.057	306.966	211.641	731.85	205.185	-203.52	650.931	644.951	-184.684	741.686	373.396	-118.762	756.267	398.911	-127.773	766.855	298.165	-100.064	731.522	194.437
651	6.5	49.204	1193.99	470.363	121.369	1195.72	512.434	-23.7797	1196.21	512.213	218.425	1036.8	644.605	-129.25	1037.57	670.913	30.0457	983.903	566.482	278.448	652.886	663.835	281.21	744.319	389.493	208.142	752.764	408.626	224.58	768.092	306.9	211.609	731.81	205.164	-203.534	650.929	644.93	-184.714	741.676	373.377	-118.807	756.26	398.89	-127.783	766.781	298.173	-100.069	731.496	194.433
652	6.51	49.1888	1194.01	470.379	121.357	1195.71	512.422	-23.7961	1196.23	512.236	218.419	1036.81	644.634	-129.262	1037.59	670.87	30.0032	983.921	566.465	278.455	652.861	663.815	281.17	744.326	389.473	208.1	752.772	408.6	224.552	768.138	306.87	211.592	731.787	205.156	-203.535	650.905	644.882	-184.75	741.68	373.405	-118.853	756.258	398.926	-127.806	766.756	298.204	-100.088	731.494	194.436
653	6.52	49.1942	1194	470.367	121.37	1195.71	512.426	-23.803	1196.25	512.223	218.432	1036.8	644.625	-129.264	1037.59	670.854	29.9995	983.954	566.455	278.494	652.845	663.816	281.178	744.329	389.49	208.091	752.784	408.587	224.527	768.158	306.871	211.578	731.787	205.151	-203.528	650.857	644.818	-184.762	741.68	373.383	-118.89	756.262	398.935	-127.843	766.756	298.221	-100.111	731.49	194.444
654	6.53	49.2303	1194.02	470.362	121.389	1195.72	512.393	-23.7725	1196.23	512.233	218.465	1036.81	644.624	-129.253	1037.6	670.879	30.0296	984.002	566.382	278.528	652.857	663.858	281.233	744.323	389.555	208.127	752.792	408.619	224.524	768.115	306.919	211.607	731.805	205.198	-203.532	650.843	644.795	-184.744	741.686	373.384	-118.868	756.257	398.914	-127.825	766.768	298.198	-100.111	731.488	194.484
655	6.54	49.3131	1194.03	470.386	121.446	1195.75	512.429	-23.7027	1196.22	512.22	218.509	1036.82	644.65	-129.214	1037.63	670.886	30.1085	984.027	566.361	278.541	652.875	663.899	281.303	744.322	389.615	208.177	752.805	408.661	224.553	768.062	306.987	211.661	731.829	205.253	-203.546	650.84	644.759	-184.706	741.687	373.421	-118.79	756.265	398.924	-127.759	766.82	298.169	-100.086	731.497	194.493
656	6.55	49.4032	1194.05	470.328	121.526	1195.76	512.453	-23.6188	1196.24	512.181	218.55	1036.82	644.636	-129.175	1037.64	670.874	30.1874	984.038	566.372	278.55	652.878	663.905	281.346	744.332	389.63	208.232	752.797	408.698	224.589	768.052	306.976	211.7	731.843	205.259	-203.548	650.862	644.767	-184.65	741.706	373.407	-118.738	756.282	398.883	-127.707	766.872	298.156	-100.043	731.511	194.457
657	6.56	49.4599	1194.07	470.315	121.569	1195.76	512.432	-23.5553	1196.25	512.177	218.571	1036.83	644.617	-129.16	1037.67	670.838	30.225	984.049	566.352	278.537	652.872	663.87	281.343	744.333	389.6	208.259	752.796	408.694	224.62	768.041	306.945	211.7	731.845	205.245	-203.567	650.911	644.804	-184.627	741.713	373.367	-118.717	756.278	398.841	-127.684	766.895	298.112	-100.02	731.521	194.447
658	6.57	49.448	1194.02	470.427	121.57	1195.74	512.471	-23.5495	1196.22	512.238	218.562	1036.82	644.615	-129.161	1037.67	670.832	30.2029	984.016	566.445	278.522	652.892	663.892	281.311	744.314	389.584	208.227	752.777	408.649	224.605	768.028	306.936	211.671	731.83	205.231	-203.601	650.972	644.853	-184.642	741.703	373.368	-118.752	756.254	398.865	-127.716	766.858	298.145	-100.026	731.518	194.446
659	6.58	49.423	1193.97	470.539	121.554	1195.7	512.506	-23.5865	1196.2	512.275	218.536	1036.82	644.653	-129.185	1037.67	670.822	30.1472	983.991	566.504	278.503	652.894	663.87	281.254	744.276	389.547	208.159	752.743	408.641	224.594	768.04	306.96	211.622	731.8	205.203	-203.621	651.018	644.886	-184.684	741.674	373.405	-118.805	756.232	398.919	-127.762	766.801	298.191	-100.055	731.489	194.47
660	6.59	49.3943	1193.95	470.578	121.525	1195.68	512.503	-23.6021	1196.2	512.261	218.517	1036.81	644.649	-129.214	1037.67	670.789	30.0913	983.971	566.499	278.505	652.877	663.843	281.201	744.26	389.506	208.108	752.711	408.658	224.573	768.073	306.941	211.584	731.77	205.184	-203.637	651.035	644.859	-184.728	741.657	373.406	-118.852	756.219	398.914	-127.793	766.76	298.216	-100.081	731.469	194.474
661	6.6	49.4009	1193.96	470.549	121.537	1195.68	512.501	-23.5907	1196.24	512.218	218.53	1036.81	644.641	-129.212	1037.69	670.761	30.0753	984.035	566.417	278.52	652.87	663.837	281.196	744.28	389.494	208.113	752.717	408.648	224.555	768.094	306.891	211.591	731.76	205.178	-203.633	651.032	644.805	-184.731	741.652	373.39	-118.853	756.224	398.9	-127.778	766.761	298.176	-100.08	731.477	194.452
662	6.61	49.4628	1194.02	470.533	121.576	1195.72	512.491	-23.5372	1196.29	512.18	218.561	1036.83	644.64	-129.198	1037.71	670.763	30.1159	984.123	566.32	278.536	652.876	663.872	281.245	744.303	389.529	208.175	752.759	408.663	224.562	768.101	306.909	211.634	731.792	205.189	-203.624	651.009	644.755	-184.706	741.676	373.375	-118.816	756.256	398.857	-127.747	766.81	298.131	-100.058	731.504	194.439
663	6.62	49.5371	1194.11	470.435	121.621	1195.78	512.474	-23.4695	1196.34	512.162	218.61	1036.86	644.654	-129.176	1037.73	670.769	30.1796	984.197	566.264	278.553	652.874	663.885	281.306	744.321	389.582	208.227	752.794	408.68	224.582	768.08	306.966	211.681	731.832	205.213	-203.62	650.95	644.693	-184.666	741.735	373.371	-118.763	756.304	398.835	-127.71	766.862	298.087	-100.032	731.537	194.427
664	6.63	49.5886	1194.19	470.346	121.678	1195.84	512.431	-23.4247	1196.39	512.142	218.647	1036.88	644.635	-129.151	1037.76	670.749	30.2203	984.274	566.16	278.565	652.853	663.86	281.336	744.36	389.566	208.248	752.831	408.659	224.571	768.092	306.911	211.713	731.863	205.223	-203.622	650.931	644.698	-184.628	741.786	373.325	-118.73	756.355	398.784	-127.666	766.911	298.067	-100.027	731.556	194.401
665	6.64	49.597	1194.21	470.29	121.699	1195.85	512.422	-23.4074	1196.39	512.129	218.642	1036.88	644.591	-129.147	1037.79	670.726	30.2063	984.307	566.049	278.562	652.848	663.832	281.327	744.37	389.523	208.259	752.853	408.618	224.558	768.105	306.878	211.72	731.875	205.215	-203.635	650.931	644.675	-184.628	741.784	373.305	-118.741	756.358	398.759	-127.672	766.914	298.036	-100.024	731.546	194.4
666	6.65	49.5835	1194.16	470.368	121.672	1195.81	512.458	-23.4432	1196.35	512.199	218.614	1036.86	644.602	-129.173	1037.78	670.716	30.1808	984.258	566.149	278.535	652.851	663.831	281.276	744.344	389.514	208.225	752.819	408.604	224.556	768.105	306.908	211.667	731.861	205.192	-203.663	650.956	644.683	-184.67	741.741	373.337	-118.786	756.313	398.838	-127.721	766.865	298.099	-100.051	731.518	194.44
667	6.66	49.5455	1194.06	470.496	121.639	1195.76	512.529	-23.4819	1196.29	512.294	218.58	1036.83	644.66	-129.209	1037.76	670.728	30.1472	984.161	566.319	278.51	652.885	663.843	281.218	744.313	389.52	208.161	752.76	408.654	224.549	768.086	306.933	211.604	731.823	205.177	-203.694	651.008	644.755	-184.722	741.68	373.412	-118.833	756.245	398.935	-127.776	766.79	298.194	-100.083	731.476	194.493
668	6.67	49.4961	1193.98	470.576	121.607	1195.71	512.581	-23.5111	1196.21	512.386	218.554	1036.81	644.708	-129.234	1037.77	670.721	30.0985	984.056	566.418	278.51	652.948	663.898	281.163	744.249	389.497	208.096	752.714	408.689	224.537	768.061	306.965	211.555	731.771	205.168	-203.713	651.043	644.818	-184.766	741.639	373.453	-118.867	756.183	398.956	-127.824	766.714	298.228	-100.111	731.418	194.507
[truncated: 3 more columns]

## Sheet: Trial01
PathFileType	4	(X/Y/Z)	Trial01.trc
DataRate	CameraRate	NumFrames	NumMarkers	Units	OrigDataRate	OrigDataStartFrame	OrigNumFrames
100	100	935	16	mm	100	1	935
Frame#	Time	nasion			r zyg pr			l zyg pr			r should			l should			sternum			r elbow			r ulna			r radius			r hand			r finger			l elbow			l ulna			l radius			l hand			l finger
		X1	Y1	Z1	X2	Y2	Z2	X3	Y3	Z3	X4	Y4	Z4	X5	Y5	Z5	X6	Y6	Z6	X7	Y7	Z7	X8	Y8	Z8	X9	Y9	Z9	X10	Y10	Z10	X11	Y11	Z11	X12	Y12	Z12	X13	Y13	Z13	X14	Y14	Z14	X15	Y15	Z15	X16	Y16	Z16
1	0	33.811	1189.16	533.887	106.428	1198.5	573.662	-38.2276	1194.68	575.978	208.739	1046.25	710.715	-132.083	1037.33	734.259	23.219	1004.48	614.551	290.547	680.836	633.558	258.286	750.038	355.639	185.681	752.904	380.845	191.004	765.724	278.494	171.126	732.034	177.967	-206.797	673.48	621.793	-160.026	744.481	350.593	-96.3494	760.281	378.253	-99.0131	763.867	275.429	-63.6387	731.465	176.087
2	0.01	33.669	1189.02	534.079	106.34	1198.41	573.632	-38.3435	1194.62	576.089	208.752	1046.23	710.729	-132.092	1037.31	734.26	23.2058	1004.35	614.741	289.929	680.478	632.471	258.288	749.985	355.668	185.707	752.857	380.931	191.046	765.642	278.565	171.145	731.947	178.007	-206.863	673.491	621.789	-160.022	744.432	350.609	-96.3391	760.219	378.266	-99.0173	763.821	275.442	-63.604	731.39	176.106
3	0.02	33.5685	1188.96	534.131	106.278	1198.37	573.574	-38.413	1194.6	576.183	208.782	1046.22	710.751	-132.081	1037.28	734.269	23.2447	1004.29	614.79	289.209	680.027	631.218	258.294	749.964	355.645	185.725	752.829	380.941	191.104	765.587	278.65	171.194	731.89	178.072	-206.896	673.511	621.793	-159.987	744.395	350.615	-96.3092	760.167	378.289	-98.9929	763.815	275.407	-63.5668	731.359	176.095
4	0.03	33.4471	1189	534.033	106.216	1198.38	573.475	-38.4644	1194.65	576.213	208.798	1046.24	710.766	-132.058	1037.29	734.264	23.3082	1004.36	614.728	290.113	680.695	632.956	258.328	749.986	355.64	185.757	752.844	380.942	191.154	765.61	278.66	171.254	731.892	178.109	-206.884	673.546	621.809	-159.953	744.407	350.613	-96.2831	760.19	378.233	-98.9613	763.833	275.451	-63.5297	731.369	176.093
5	0.04	33.3554	1189.09	533.876	106.186	1198.42	573.396	-38.5036	1194.71	576.185	208.811	1046.26	710.761	-132.027	1037.3	734.236	23.3775	1004.45	614.638	289.816	680.457	632.421	258.383	750.023	355.686	185.784	752.899	380.91	191.167	765.676	278.59	171.296	731.927	178.093	-206.839	673.604	621.86	-159.921	744.464	350.585	-96.2623	760.231	378.211	-98.9329	763.866	275.459	-63.4974	731.423	176.095
6	0.05	33.2844	1189.19	533.727	106.141	1198.45	573.311	-38.5257	1194.79	576.174	208.857	1046.29	710.766	-131.991	1037.33	734.237	23.394	1004.54	614.496	288.768	679.651	630.415	258.432	750.064	355.727	185.821	752.971	380.902	191.212	765.731	278.59	171.312	731.986	178.054	-206.78	673.674	621.933	-159.883	744.527	350.547	-96.2398	760.279	378.219	-98.9033	763.91	275.46	-63.4771	731.48	176.065
7	0.06	33.1753	1189.23	533.626	106.052	1198.47	573.218	-38.5839	1194.83	576.218	208.867	1046.31	710.764	-131.955	1037.36	734.241	23.3856	1004.58	614.406	289.132	679.839	630.972	258.433	750.074	355.737	185.829	753.01	380.89	191.201	765.762	278.568	171.298	732.042	178.032	-206.744	673.684	621.975	-159.889	744.545	350.558	-96.2403	760.315	378.198	-98.891	763.942	275.423	-63.4793	731.51	176.053
8	0.07	33.0029	1189.23	533.549	105.95	1198.45	573.112	-38.695	1194.81	576.272	208.855	1046.28	710.732	-131.966	1037.36	734.217	23.3362	1004.61	614.335	290.199	680.552	632.888	258.407	750.055	355.721	185.779	752.976	380.838	191.135	765.768	278.508	171.241	732.064	177.992	-206.737	673.63	621.949	-159.92	744.528	350.555	-96.2585	760.318	378.152	-98.8953	763.904	275.387	-63.518	731.514	176.029
9	0.08	32.8156	1189.22	533.499	105.847	1198.42	573.03	-38.8082	1194.78	576.346	208.835	1046.25	710.717	-132.004	1037.36	734.22	23.2716	1004.58	614.326	290.463	680.71	633.373	258.346	750.035	355.705	185.711	752.937	380.825	191.065	765.759	278.46	171.171	732.087	177.906	-206.755	673.569	621.888	-159.968	744.499	350.56	-96.2964	760.292	378.171	-98.9298	763.838	275.419	-63.5827	731.486	176.006
10	0.09	32.6703	1189.21	533.556	105.759	1198.4	573.026	-38.9109	1194.76	576.507	208.818	1046.24	710.753	-132.029	1037.36	734.239	23.2224	1004.51	614.456	290.513	680.778	633.505	258.282	750.02	355.696	185.659	752.904	380.852	191.016	765.741	278.478	171.102	732.078	177.912	-206.79	673.514	621.84	-160.008	744.479	350.614	-96.3351	760.264	378.26	-98.9727	763.79	275.484	-63.6315	731.465	176.03
11	0.1	32.5925	1189.17	533.686	105.692	1198.37	573.019	-38.9718	1194.75	576.587	208.812	1046.23	710.78	-132.043	1037.37	734.235	23.2055	1004.47	614.543	290.477	680.821	633.526	258.25	750.011	355.682	185.637	752.886	380.868	190.997	765.711	278.512	171.086	732.052	177.943	-206.806	673.519	621.81	-160.023	744.468	350.644	-96.3525	760.248	378.3	-98.9976	763.782	275.518	-63.6656	731.455	176.043
12	0.11	32.5771	1189.14	533.71	105.703	1198.35	573.026	-38.9738	1194.75	576.632	208.839	1046.23	710.784	-132.008	1037.38	734.247	23.2844	1004.46	614.598	289.863	680.444	632.498	258.272	750.01	355.674	185.674	752.882	380.871	191.048	765.697	278.558	171.133	732.005	177.992	-206.802	673.614	621.881	-159.986	744.463	350.626	-96.3157	760.242	378.263	-98.9729	763.799	275.502	-63.6421	731.446	176.06
13	0.12	32.6138	1189.12	533.784	105.761	1198.35	573.036	-38.9315	1194.79	576.658	208.908	1046.23	710.804	-131.947	1037.4	734.262	23.3986	1004.45	614.674	289.147	679.966	631.241	258.326	750.02	355.671	185.744	752.89	380.922	191.154	765.692	278.633	171.229	731.963	178.047	-206.766	673.728	621.98	-159.912	744.471	350.591	-96.2415	760.229	378.211	-98.9329	763.83	275.448	-63.563	731.437	176.066
14	0.13	32.6432	1189.12	533.832	105.786	1198.36	573.002	-38.8841	1194.81	576.674	208.976	1046.21	710.804	-131.885	1037.4	734.29	23.4949	1004.45	614.745	289.529	680.226	631.977	258.369	750.024	355.668	185.778	752.896	380.917	191.217	765.699	278.651	171.299	731.933	178.072	-206.709	673.807	622.079	-160.06	744.766	350.361	-96.1864	760.225	378.211	-99.0596	764.139	275.373	-63.5204	731.432	176.06
15	0.14	32.6238	1189.11	533.839	105.789	1198.35	572.96	-38.8825	1194.82	576.701	209.017	1046.18	710.806	-131.853	1037.38	734.297	23.5373	1004.44	614.765	289.137	679.881	631.229	258.404	750.004	355.686	185.785	752.898	380.889	191.216	765.699	278.625	171.327	731.912	178.091	-206.674	673.818	622.113	-160.294	745.094	350.088	-96.168	760.217	378.211	-99.2752	764.51	275.261	-63.4953	731.42	176.053
16	0.15	32.5721	1189.1	533.86	105.759	1198.32	572.931	-38.9191	1194.84	576.756	209.033	1046.16	710.838	-131.84	1037.37	734.307	23.5191	1004.42	614.788	289.646	680.145	632.108	258.41	749.959	355.723	185.754	752.887	380.859	191.187	765.696	278.639	171.302	731.914	178.09	-206.659	673.743	622.022	-159.969	744.621	350.456	-96.1842	760.204	378.237	-98.9908	764.005	275.37	-63.5131	731.41	176.043
17	0.16	32.4762	1189.09	533.915	105.708	1198.27	572.952	-38.9739	1194.82	576.866	209.019	1046.15	710.877	-131.845	1037.37	734.302	23.4531	1004.42	614.775	289.312	679.829	631.429	258.38	749.928	355.772	185.696	752.866	380.856	191.119	765.691	278.641	171.237	731.937	178.076	-206.672	673.643	621.943	-159.934	744.497	350.577	-96.2363	760.213	378.262	-98.9492	763.858	275.444	-63.5738	731.405	176.049
18	0.17	32.3789	1189.16	533.835	105.667	1198.26	572.95	-39.0168	1194.85	576.936	209.008	1046.13	710.882	-131.856	1037.38	734.291	23.4026	1004.46	614.708	289.742	680.103	632.212	258.328	749.925	355.771	185.66	752.861	380.874	191.048	765.694	278.585	171.158	731.996	178.016	-206.674	673.583	621.906	-159.962	744.471	350.627	-96.2797	760.223	378.262	-98.9426	763.795	275.479	-63.6221	731.424	176.058
19	0.18	32.3448	1189.25	533.637	105.672	1198.29	572.85	-39.0097	1194.88	576.901	209.02	1046.13	710.859	-131.847	1037.4	734.273	23.3951	1004.53	614.552	288.821	679.42	630.532	258.292	749.947	355.696	185.655	752.883	380.832	191.038	765.729	278.495	171.122	732.069	177.929	-206.643	673.55	621.862	-159.971	744.494	350.597	-96.2671	760.257	378.226	-98.917	763.768	275.475	-63.6457	731.45	176.025
20	0.19	32.373	1189.3	533.592	105.696	1198.33	572.798	-38.9729	1194.94	576.889	209.043	1046.16	710.873	-131.824	1037.44	734.245	23.4492	1004.61	614.41	288.457	679.184	629.969	258.291	749.997	355.656	185.694	752.905	380.846	191.071	765.776	278.495	171.127	732.121	177.904	-206.615	673.614	621.902	-159.954	744.533	350.566	-96.2292	760.293	378.189	-98.8794	763.784	275.486	-63.6438	731.479	176.008
21	0.2	32.4225	1189.33	533.625	105.741	1198.36	572.812	-38.9287	1195.01	576.941	209.07	1046.19	710.878	-131.794	1037.48	734.252	23.5159	1004.68	614.373	288.236	679.086	629.667	258.328	750.058	355.673	185.747	752.929	380.905	191.135	765.817	278.537	171.155	732.146	177.935	-206.579	673.74	622.011	-159.905	744.571	350.564	-96.2025	760.325	378.208	-98.8504	763.828	275.508	-63.611	731.504	176.025
22	0.21	32.476	1189.34	533.669	105.813	1198.34	572.868	-38.8679	1195.06	576.991	209.122	1046.2	710.91	-131.742	1037.5	734.264	23.6114	1004.65	614.501	288.091	679.034	629.495	258.382	750.065	355.683	185.787	752.953	380.919	191.215	765.81	278.615	171.225	732.111	177.972	-206.551	673.843	622.098	-159.839	744.579	350.554	-96.1584	760.324	378.236	-98.8401	763.87	275.499	-63.5621	731.515	176.032
23	0.22	32.5391	1189.27	533.749	105.863	1198.3	572.866	-38.8238	1195.06	576.97	209.177	1046.16	710.945	-131.706	1037.47	734.26	23.6987	1004.55	614.676	287.978	678.963	629.375	258.406	750.024	355.68	185.818	752.939	380.918	191.279	765.742	278.657	171.305	732.017	178.046	-206.551	673.887	622.183	-159.788	744.548	350.559	-96.1079	760.283	378.212	-98.8091	763.86	275.452	-63.5305	731.469	176.039
24	0.23	32.5479	1189.14	533.941	105.859	1198.25	572.872	-38.8358	1195.01	577.017	209.201	1046.09	710.962	-131.682	1037.43	734.26	23.7242	1004.41	614.885	288.556	679.354	630.438	258.405	749.945	355.667	185.802	752.889	380.912	191.27	765.68	278.676	171.343	731.908	178.099	-206.563	673.846	622.171	-159.987	744.757	350.377	-96.1087	760.201	378.231	-98.9967	764.115	275.377	-63.5416	731.381	176.041
25	0.24	32.497	1189.02	534.137	105.821	1198.17	572.891	-38.8745	1194.93	577.112	209.219	1046.02	710.98	-131.67	1037.38	734.256	23.7094	1004.28	615.08	289.396	679.907	631.892	258.367	749.837	355.675	185.757	752.806	380.921	191.227	765.602	278.704	171.312	731.81	178.132	-206.569	673.736	622.065	-160.488	745.313	349.899	-96.136	760.126	378.277	-99.4146	764.704	275.244	-63.5894	731.302	176.028
26	0.25	32.4474	1188.95	534.215	105.767	1198.12	572.893	-38.9088	1194.86	577.204	209.217	1045.98	710.995	-131.689	1037.37	734.259	23.6694	1004.22	615.167	289.117	679.633	631.274	258.334	749.763	355.691	185.714	752.769	380.899	191.188	765.56	278.72	171.258	731.769	178.141	-206.553	673.625	621.948	-160.448	745.174	349.996	-96.168	760.095	378.316	-99.3836	764.536	275.301	-63.6422	731.27	176.017
27	0.26	32.3942	1189	534.16	105.723	1198.12	572.843	-38.9363	1194.89	577.242	209.205	1045.99	711.026	-131.709	1037.39	734.261	23.6235	1004.3	615.06	289.613	679.95	632.134	258.31	749.776	355.702	185.668	752.782	380.901	191.11	765.592	278.674	171.176	731.838	178.078	-206.517	673.595	621.94	-160.057	744.619	350.476	-96.2295	760.143	378.323	-99.0445	763.936	275.467	-63.7013	731.321	176.014
28	0.27	32.3404	1189.17	533.973	105.735	1198.19	572.793	-38.9231	1194.96	577.245	209.214	1046.03	711.031	-131.697	1037.45	734.269	23.6132	1004.47	614.815	288.782	679.328	630.578	258.313	749.859	355.701	185.651	752.852	380.871	191.081	765.7	278.614	171.13	731.978	177.99	-206.478	673.643	622.006	-159.946	744.536	350.6	-96.2476	760.23	378.298	-98.9305	763.806	275.548	-63.7257	731.422	176.02
29	0.28	32.3834	1189.33	533.708	105.794	1198.29	572.707	-38.8722	1195.07	577.174	209.252	1046.07	710.972	-131.649	1037.52	734.242	23.6599	1004.67	614.542	288.536	679.167	630.14	258.341	749.98	355.679	185.71	752.943	380.837	191.105	765.832	278.484	171.147	732.139	177.885	-206.431	673.729	622.072	-159.888	744.582	350.598	-96.1897	760.307	378.215	-98.8673	763.802	275.522	-63.6942	731.523	175.98
30	0.29	32.4505	1189.45	533.415	105.851	1198.35	572.606	-38.8025	1195.15	577.032	209.286	1046.1	710.942	-131.597	1037.57	734.234	23.7288	1004.77	614.345	288.313	679.034	629.824	258.357	750.069	355.63	185.772	753.019	380.803	191.152	765.908	278.393	171.17	732.232	177.814	-206.406	673.835	622.16	-159.841	744.633	350.554	-96.1211	760.357	378.139	-98.7944	763.803	275.486	-63.6543	731.565	175.933
31	0.3	32.4451	1189.48	533.366	105.877	1198.36	572.586	-38.7733	1195.17	577.051	209.313	1046.11	710.95	-131.57	1037.6	734.223	23.7729	1004.79	614.307	288.122	678.933	629.602	258.36	750.094	355.601	185.79	753.042	380.794	191.182	765.923	278.403	171.189	732.241	177.803	-206.408	673.891	622.199	-159.811	744.643	350.539	-96.0885	760.36	378.126	-98.7441	763.812	275.513	-63.6356	731.558	175.944
32	0.31	32.4316	1189.35	533.619	105.882	1198.29	572.643	-38.7857	1195.11	577.159	209.337	1046.09	710.97	-131.551	1037.61	734.214	23.7972	1004.67	614.532	288.003	678.873	629.451	258.364	750.036	355.622	185.783	752.987	380.848	191.19	765.863	278.485	171.219	732.152	177.89	-206.418	673.89	622.176	-159.798	744.597	350.56	-96.0917	760.317	378.186	-98.7654	763.797	275.567	-63.6477	731.511	175.996
33	0.32	32.4297	1189.12	533.963	105.862	1198.17	572.705	-38.8083	1195	577.253	209.359	1046.01	710.989	-131.544	1037.55	734.221	23.8235	1004.48	614.827	287.942	678.819	629.357	258.354	749.91	355.639	185.761	752.866	380.931	191.199	765.725	278.612	171.253	731.992	178.021	-206.475	673.836	622.111	-159.807	744.51	350.613	-96.113	760.214	378.3	-98.8081	763.761	275.579	-63.667	731.406	176.028
34	0.33	32.4445	1188.91	534.23	105.848	1198.04	572.728	-38.8198	1194.88	577.331	209.385	1045.91	711.014	-131.518	1037.47	734.231	23.8378	1004.26	615.09	287.966	678.796	629.395	258.334	749.781	355.639	185.746	752.773	380.945	191.201	765.587	278.726	171.281	731.817	178.112	-206.506	673.761	622.041	-159.835	744.417	350.667	-96.1297	760.099	378.372	-98.8403	763.713	275.535	-63.6542	731.293	176.051
35	0.34	32.4908	1188.82	534.333	105.873	1197.96	572.768	-38.7947	1194.8	577.382	209.423	1045.82	711.056	-131.48	1037.43	734.248	23.8567	1004.14	615.253	288.586	679.197	630.53	258.351	749.698	355.676	185.751	752.734	380.96	191.24	765.508	278.802	171.317	731.72	178.181	-206.507	673.721	622.04	-160.036	744.645	350.477	-96.097	760.023	378.383	-99.0131	763.975	275.481	-63.6375	731.236	176.083
36	0.35	32.5452	1188.86	534.262	105.933	1197.97	572.749	-38.7363	1194.82	577.325	209.452	1045.82	711.071	-131.442	1037.43	734.229	23.8845	1004.19	615.182	289.389	679.723	631.967	258.396	749.703	355.724	185.771	752.753	380.966	191.291	765.542	278.807	171.325	731.749	178.149	-206.475	673.74	622.057	-160.263	745.036	350.19	-96.0531	760.064	378.349	-99.2072	764.358	275.4	-63.635	731.254	176.081
37	0.36	32.5592	1189.02	534.037	105.948	1198.05	572.651	-38.6879	1194.93	577.224	209.453	1045.89	711.04	-131.429	1037.51	734.197	23.8945	1004.39	614.905	288.591	679.089	630.412	258.434	749.792	355.754	185.808	752.833	380.942	191.286	765.661	278.697	171.3	731.885	178.081	-206.417	673.828	622.108	-159.903	744.665	350.479	-96.0753	760.195	378.252	-98.9075	763.939	275.466	-63.6486	731.355	176.048
38	0.37	32.5612	1189.22	533.751	105.967	1198.13	572.555	-38.6407	1195.02	577.12	209.438	1045.98	711.03	-131.454	1037.6	734.188	23.877	1004.62	614.597	288.402	678.924	630.046	258.446	749.908	355.772	185.828	752.957	380.914	191.252	765.801	278.582	171.243	732.089	177.954	-206.381	673.907	622.182	-159.832	744.65	350.552	-96.1121	760.319	378.208	-98.8209	763.865	275.496	-63.6799	731.474	176.035
39	0.38	32.5473	1189.36	533.489	105.985	1198.15	572.503	-38.6131	1195.06	577.043	209.41	1046.03	711.001	-131.483	1037.65	734.2	23.8302	1004.75	614.347	288.308	678.861	629.893	258.414	749.998	355.74	185.816	753.026	380.876	191.213	765.901	278.466	171.196	732.229	177.857	-206.363	673.945	622.229	-159.823	744.692	350.57	-96.1213	760.383	378.192	-98.7982	763.851	275.509	-63.7018	731.542	176.009
40	0.39	32.541	1189.35	533.378	105.978	1198.11	572.47	-38.6046	1195.02	577.031	209.377	1046.02	710.986	-131.515	1037.65	734.182	23.7803	1004.79	614.216	288.186	678.8	629.706	258.372	750.018	355.675	185.783	753.024	380.825	191.182	765.913	278.42	171.165	732.262	177.806	-206.361	673.92	622.228	-159.833	744.673	350.558	-96.1269	760.365	378.17	-98.7912	763.802	275.507	-63.7193	731.529	175.99
41	0.4	32.5673	1189.22	533.491	105.984	1198.03	572.54	-38.6212	1194.91	577.071	209.336	1045.99	710.997	-131.55	1037.62	734.141	23.7555	1004.71	614.325	288.015	678.735	629.488	258.338	749.96	355.644	185.718	752.974	380.79	191.152	765.855	278.439	171.146	732.198	177.807	-206.41	673.836	622.159	-159.862	744.599	350.572	-96.1629	760.316	378.216	-98.8164	763.737	275.491	-63.7667	731.481	175.975
42	0.41	32.6112	1189.03	533.828	105.965	1197.91	572.589	-38.6382	1194.81	577.158	209.318	1045.96	711.024	-131.578	1037.57	734.149	23.757	1004.52	614.65	287.843	678.682	629.305	258.32	749.86	355.661	185.692	752.881	380.857	191.157	765.734	278.559	171.148	732.051	177.908	-206.459	673.742	622.066	-159.873	744.496	350.619	-96.1857	760.244	378.28	-98.8442	763.699	275.522	-63.8021	731.402	175.989
43	0.42	32.6675	1188.84	534.119	105.96	1197.83	572.645	-38.628	1194.7	577.23	209.316	1045.91	711.042	-131.578	1037.51	734.156	23.7714	1004.31	614.951	287.745	678.669	629.21	258.311	749.781	355.657	185.711	752.805	380.944	191.195	765.614	278.706	171.193	731.897	178.026	-206.47	673.694	622.038	-159.857	744.425	350.667	-96.1709	760.154	378.332	-98.8436	763.693	275.539	-63.7912	731.309	176.023
44	0.43	32.756	1188.72	534.244	105.997	1197.8	572.706	-38.5674	1194.62	577.226	209.325	1045.86	711.054	-131.557	1037.46	734.156	23.8046	1004.19	615.098	287.758	678.712	629.255	258.316	749.745	355.639	185.717	752.768	380.922	191.236	765.565	278.775	171.266	731.803	178.092	-206.441	673.696	622.088	-160.03	744.663	350.466	-96.1248	760.086	378.368	-99.0005	763.977	275.474	-63.7558	731.262	176.068
45	0.44	32.8648	1188.73	534.267	106.089	1197.81	572.755	-38.4835	1194.62	577.156	209.362	1045.87	711.066	-131.537	1037.43	734.162	23.8541	1004.17	615.096	287.803	678.742	629.362	258.351	749.746	355.661	185.746	752.794	380.897	191.301	765.59	278.768	171.328	731.773	178.143	-206.388	673.673	622.124	-160.447	745.283	350.004	-96.0696	760.065	378.336	-99.3637	764.653	275.308	-63.7099	731.273	176.065
46	0.45	32.9781	1188.84	534.137	106.172	1197.88	572.755	-38.4019	1194.69	577.031	209.383	1045.91	711.053	-131.517	1037.44	734.145	23.9258	1004.24	614.983	287.881	678.778	629.507	258.404	749.79	355.715	185.799	752.862	380.861	191.351	765.664	278.723	171.374	731.831	178.131	-206.316	673.692	622.185	-160.318	745.209	350.069	-96.0328	760.126	378.281	-99.2689	764.582	275.314	-63.6708	731.337	176.038
47	0.46	33.0091	1188.99	533.897	106.183	1197.97	572.693	-38.3778	1194.79	576.896	209.378	1045.96	711.034	-131.524	1037.46	734.113	23.9289	1004.37	614.732	287.947	678.791	629.609	258.444	749.853	355.747	185.848	752.951	380.855	191.364	765.756	278.657	171.359	731.959	178.018	-206.233	673.714	622.246	-159.877	744.697	350.504	-96.0153	760.216	378.189	-98.8914	764.012	275.483	-63.6707	731.415	175.999
48	0.47	32.9344	1189.13	533.639	106.123	1198.05	572.619	-38.4187	1194.86	576.845	209.328	1046.04	710.989	-131.572	1037.49	734.072	23.8576	1004.52	614.506	288.026	678.83	629.705	258.45	749.92	355.767	185.835	753.009	380.846	191.298	765.851	278.544	171.279	732.114	177.879	-206.186	673.686	622.253	-159.804	744.601	350.591	-96.056	760.286	378.184	-98.8201	763.876	275.526	-63.7139	731.487	175.958
49	0.48	32.8181	1189.22	533.479	106.042	1198.08	572.614	-38.5039	1194.84	576.81	209.254	1046.09	710.949	-131.641	1037.51	734.044	23.7623	1004.6	614.374	288.01	678.86	629.674	258.381	749.986	355.721	185.757	753.027	380.806	191.2	765.907	278.441	171.197	732.197	177.82	-206.196	673.617	622.206	-159.843	744.587	350.609	-96.1331	760.309	378.209	-98.8268	763.82	275.535	-63.7861	731.511	175.956
50	0.49	32.7213	1189.21	533.504	105.947	1198.06	572.595	-38.5702	1194.77	576.857	209.203	1046.1	710.95	-131.678	1037.48	734.031	23.6762	1004.6	614.304	287.912	678.839	629.545	258.305	750.008	355.666	185.683	752.993	380.788	191.107	765.893	278.416	171.135	732.208	177.794	-206.241	673.52	622.164	-159.896	744.555	350.669	-96.1749	760.287	378.255	-98.8504	763.761	275.537	-63.8507	731.48	175.947
51	0.5	32.6649	1189.13	533.6	105.893	1198.01	572.609	-38.6273	1194.69	576.912	209.182	1046.06	710.937	-131.691	1037.46	734.042	23.646	1004.51	614.402	287.793	678.787	629.385	258.273	749.947	355.654	185.661	752.927	380.807	191.069	765.816	278.43	171.108	732.132	177.825	-206.274	673.457	622.135	-159.923	744.5	350.718	-96.1767	760.235	378.283	-98.8449	763.719	275.559	-63.8717	731.421	175.963
52	0.51	32.6568	1189.01	533.797	105.891	1197.97	572.664	-38.6627	1194.64	576.978	209.202	1046.03	710.935	-131.692	1037.42	734.04	23.6963	1004.35	614.661	287.734	678.756	629.291	258.299	749.864	355.674	185.693	752.869	380.865	191.129	765.728	278.525	171.138	732.021	177.919	-206.286	673.463	622.155	-159.898	744.43	350.734	-96.1752	760.184	378.315	-98.8533	763.702	275.572	-63.8685	731.39	175.997
53	0.52	32.6891	1188.93	533.955	105.896	1197.95	572.691	-38.6527	1194.61	576.992	209.247	1045.99	710.919	-131.658	1037.4	734.057	23.7744	1004.24	614.851	287.74	678.75	629.271	258.344	749.819	355.672	185.728	752.82	380.9	191.24	765.648	278.703	171.23	731.913	178.019	-206.246	673.489	622.135	-159.832	744.409	350.693	-96.1214	760.141	378.352	-98.8415	763.731	275.55	-63.8176	731.349	176.016
54	0.53	32.7313	1188.88	534.052	105.923	1197.95	572.722	-38.6055	1194.59	576.949	209.298	1045.98	710.886	-131.615	1037.4	734.091	23.8336	1004.21	614.931	288.392	679.18	630.388	258.388	749.807	355.671	185.772	752.821	380.919	191.325	765.632	278.771	171.324	731.847	178.111	-206.193	673.562	622.172	-159.961	744.716	350.451	-96.0542	760.127	378.356	-98.9971	764.08	275.417	-63.7414	731.328	176.03
55	0.54	32.7163	1188.91	534.005	105.947	1197.95	572.734	-38.5856	1194.59	576.88	209.328	1045.97	710.846	-131.59	1037.39	734.091	23.8447	1004.22	614.919	289.214	679.711	631.814	258.445	749.804	355.697	185.824	752.861	380.914	191.359	765.651	278.731	171.389	731.828	178.135	-206.128	673.637	622.255	-160.384	745.373	349.985	-96.0042	760.134	378.344	-99.357	764.748	275.275	-63.6979	731.338	176.023
56	0.55	32.6921	1188.95	533.902	105.917	1197.95	572.683	-38.5996	1194.61	576.865	209.325	1045.98	710.822	-131.605	1037.39	734.102	23.8163	1004.25	614.854	288.351	679.012	630.14	258.468	749.795	355.721	185.843	752.88	380.907	191.359	765.659	278.713	171.392	731.863	178.063	-206.094	673.617	622.271	-160.296	745.247	350.101	-96.0015	760.158	378.329	-99.2768	764.607	275.302	-63.7016	731.353	176.01
57	0.56	32.6308	1188.96	533.834	105.85	1197.95	572.624	-38.6682	1194.64	576.859	209.263	1046	710.809	-131.653	1037.41	734.101	23.7277	1004.33	614.659	288.19	678.867	629.819	258.443	749.792	355.748	185.795	752.89	380.88	191.287	765.694	278.628	171.315	731.93	177.988	-206.109	673.528	622.265	-159.905	744.658	350.525	-96.0601	760.198	378.311	-98.9513	763.966	275.47	-63.7466	731.375	175.997
58	0.57	32.5192	1189.03	533.733	105.751	1197.95	572.605	-38.7657	1194.63	576.829	209.183	1046.04	710.793	-131.729	1037.42	734.089	23.6033	1004.42	614.503	288.159	678.876	629.809	258.389	749.816	355.763	185.717	752.901	380.862	191.189	765.754	278.57	171.19	732.032	177.914	-206.139	673.431	622.218	-159.86	744.516	350.66	-96.1502	760.209	378.324	-98.909	763.786	275.521	-63.8342	731.4	175.982
59	0.58	32.4299	1189.11	533.559	105.687	1197.95	572.588	-38.8373	1194.62	576.829	209.104	1046.08	710.76	-131.805	1037.41	734.059	23.51	1004.47	614.39	288.096	678.885	629.745	258.315	749.861	355.727	185.671	752.91	380.833	191.097	765.79	278.488	171.116	732.109	177.862	-206.157	673.349	622.119	-159.894	744.476	350.686	-96.2123	760.219	378.361	-98.8996	763.74	275.545	-63.9007	731.41	175.971
60	0.59	32.4344	1189.11	533.548	105.708	1197.96	572.584	-38.832	1194.61	576.842	209.073	1046.11	710.754	-131.831	1037.4	734.027	23.4844	1004.49	614.309	287.98	678.883	629.601	258.285	749.902	355.676	185.674	752.917	380.824	191.078	765.791	278.426	171.102	732.133	177.819	-206.159	673.332	622.105	-159.899	744.474	350.664	-96.2253	760.223	378.371	-98.8984	763.716	275.549	-63.9134	731.422	175.957
61	0.6	32.5483	1189.08	533.596	105.784	1197.97	572.617	-38.7716	1194.6	576.794	209.076	1046.13	710.774	-131.814	1037.4	734.05	23.5262	1004.49	614.288	287.816	678.848	629.396	258.308	749.925	355.638	185.701	752.943	380.79	191.131	765.788	278.453	171.153	732.116	177.833	-206.169	673.377	622.145	-159.866	744.476	350.654	-96.1753	760.233	378.293	-98.8754	763.741	275.526	-63.8734	731.422	175.971
62	0.61	32.6886	1189.02	533.689	105.87	1197.97	572.731	-38.6778	1194.59	576.703	209.092	1046.14	710.805	-131.799	1037.38	734.084	23.6093	1004.44	614.411	287.679	678.811	629.215	258.348	749.939	355.633	185.756	752.946	380.822	191.209	765.783	278.524	171.235	732.058	177.903	-206.184	673.446	622.256	-159.828	744.465	350.668	-96.1213	760.242	378.258	-98.8584	763.774	275.501	-63.8266	731.429	175.983
63	0.62	32.8107	1188.97	533.84	105.917	1197.97	572.808	-38.595	1194.58	576.665	209.12	1046.14	710.846	-131.793	1037.35	734.106	23.6625	1004.36	614.58	287.625	678.81	629.132	258.391	749.946	355.671	185.812	752.949	380.839	191.281	765.763	278.613	171.313	731.981	178.015	-206.168	673.472	622.289	-159.995	744.738	350.489	-96.0765	760.229	378.268	-99.0197	764.102	275.424	-63.7764	731.424	176
64	0.63	32.8727	1188.94	533.902	105.946	1197.96	572.877	-38.5657	1194.54	576.709	209.122	1046.14	710.878	-131.789	1037.31	734.094	23.6692	1004.25	614.706	287.646	678.827	629.141	258.407	749.946	355.673	185.822	752.951	380.839	191.322	765.747	278.664	171.361	731.911	178.083	-206.14	673.459	622.3	-160.221	745.068	350.234	-96.0538	760.208	378.295	-99.2312	764.458	275.377	-63.7476	731.406	176.013
65	0.64	32.8787	1188.9	533.964	105.926	1197.95	572.934	-38.5866	1194.48	576.71	209.083	1046.13	710.882	-131.825	1037.27	734.094	23.6135	1004.17	614.809	287.779	678.885	629.303	258.399	749.898	355.664	185.783	752.904	380.831	191.287	765.711	278.639	171.326	731.888	178.062	-206.12	673.379	622.255	-159.892	744.581	350.571	-96.0784	760.183	378.32	-98.9581	763.976	275.493	-63.768	731.382	176.008
66	0.65	32.8532	1188.88	534.01	105.857	1197.95	572.935	-38.6444	1194.44	576.702	209.024	1046.1	710.869	-131.875	1037.24	734.109	23.5179	1004.14	614.828	287.979	678.955	629.524	258.382	749.847	355.721	185.749	752.875	380.866	191.234	765.696	278.603	171.263	731.892	178.053	-206.084	673.213	622.103	-159.841	744.433	350.672	-96.1316	760.163	378.336	-98.9115	763.823	275.555	-63.8207	731.362	176.015
67	0.66	32.8259	1188.89	534.048	105.819	1197.97	572.965	-38.7017	1194.41	576.718	208.985	1046.09	710.896	-131.925	1037.19	734.124	23.4363	1004.16	614.768	288.167	679.031	629.773	258.376	749.809	355.779	185.71	752.88	380.867	191.187	765.674	278.618	171.209	731.92	178.006	-206.061	673.091	622.05	-159.88	744.385	350.732	-96.1732	760.147	378.342	-98.9082	763.74	275.575	-63.8753	731.366	176.025
68	0.67	32.8086	1188.92	533.972	105.791	1197.99	572.999	-38.7338	1194.4	576.742	208.945	1046.09	710.916	-131.95	1037.19	734.155	23.3832	1004.22	614.663	288.237	679.06	629.89	258.363	749.809	355.792	185.699	752.88	380.873	191.163	765.677	278.627	171.178	731.954	177.974	-206.02	673.06	622.135	-159.89	744.366	350.788	-96.2005	760.156	378.384	-98.915	763.703	275.577	-63.9112	731.358	176.036
69	0.68	32.8302	1189.01	533.879	105.785	1198.04	573.013	-38.7339	1194.42	576.697	208.918	1046.12	710.895	-131.971	1037.2	734.15	23.3628	1004.31	614.498	288.156	679.036	629.798	258.36	749.855	355.755	185.684	752.915	380.84	191.161	765.719	278.575	171.182	732.005	177.932	-205.981	673.09	622.214	-159.881	744.396	350.781	-96.204	760.179	378.386	-98.9043	763.709	275.597	-63.9079	731.373	176.027
70	0.69	32.853	1189.09	533.812	105.805	1198.1	573.051	-38.7208	1194.47	576.637	208.913	1046.17	710.868	-131.98	1037.21	734.135	23.3923	1004.36	614.431	287.99	678.99	629.598	258.37	749.935	355.726	185.728	752.953	380.824	191.184	765.76	278.54	171.204	732.05	177.909	-205.962	673.192	622.296	-159.85	744.44	350.731	-96.1842	760.223	378.312	-98.8798	763.757	275.563	-63.8754	731.407	176.006
71	0.7	32.8835	1189.15	533.875	105.83	1198.16	573.067	-38.6944	1194.52	576.579	208.92	1046.21	710.845	-131.973	1037.22	734.131	23.4161	1004.41	614.396	287.794	678.945	629.36	258.376	749.991	355.675	185.764	752.979	380.829	191.238	765.784	278.542	171.239	732.07	177.894	-205.961	673.288	622.33	-159.816	744.477	350.669	-96.1285	760.247	378.282	-98.853	763.803	275.525	-63.8346	731.441	175.989
72	0.71	32.8708	1189.17	533.86	105.805	1198.18	573.076	-38.7045	1194.54	576.561	208.906	1046.23	710.832	-131.98	1037.23	734.124	23.4095	1004.41	614.389	287.627	678.907	629.138	258.358	750.003	355.626	185.754	752.974	380.822	191.242	765.783	278.524	171.236	732.068	177.878	-205.984	673.32	622.339	-159.804	744.475	350.65	-96.1095	760.252	378.258	-98.8529	763.818	275.469	-63.8196	731.451	175.989
73	0.72	32.8015	1189.15	533.952	105.742	1198.17	573.143	-38.7618	1194.55	576.632	208.881	1046.23	710.843	-131.997	1037.22	734.155	23.3743	1004.36	614.454	287.54	678.868	629.012	258.324	749.987	355.658	185.738	752.938	380.872	191.206	765.764	278.529	171.216	732.038	177.916	-206.001	673.249	622.309	-159.816	744.453	350.705	-96.1194	760.252	378.288	-98.8687	763.809	275.518	-63.8375	731.445	175.984
74	0.73	32.73	1189.13	534.161	105.691	1198.18	573.191	-38.8002	1194.54	576.765	208.867	1046.23	710.871	-132.027	1037.18	734.181	23.3378	1004.28	614.632	288.179	679.31	630.166	258.321	749.945	355.737	185.724	752.903	380.929	191.161	765.726	278.559	171.208	731.994	177.988	-205.998	673.148	622.255	-159.841	744.424	350.763	-96.136	760.232	378.357	-98.9016	763.798	275.564	-63.8675	731.425	176.014
75	0.74	32.7054	1189.08	534.274	105.664	1198.17	573.247	-38.8436	1194.5	576.83	208.867	1046.21	710.885	-132.037	1037.14	734.216	23.325	1004.2	614.736	289.095	679.93	631.775	258.337	749.894	355.754	185.715	752.876	380.929	191.168	765.677	278.615	171.223	731.937	178.013	-205.968	673.067	622.162	-159.863	744.392	350.766	-96.1618	760.188	378.348	-98.9243	763.777	275.552	-63.8736	731.392	176.019
76	0.75	32.7041	1189.07	534.284	105.663	1198.17	573.28	-38.8458	1194.45	576.824	208.9	1046.19	710.887	-132.019	1037.1	734.215	23.3709	1004.13	614.837	288.373	679.341	630.291	258.368	749.847	355.749	185.735	752.871	380.893	191.206	765.652	278.638	171.265	731.901	178.016	-205.919	672.989	622.091	-159.843	744.369	350.74	-96.1414	760.156	378.346	-98.9143	763.752	275.535	-63.8559	731.37	176.002
77	0.76	32.7355	1189.09	534.301	105.694	1198.2	573.338	-38.8377	1194.43	576.868	208.932	1046.18	710.902	-131.981	1037.06	734.22	23.421	1004.12	614.885	288.323	679.264	630.083	258.41	749.838	355.781	185.752	752.879	380.882	191.256	765.657	278.674	171.312	731.882	178.045	-205.882	672.971	622.119	-159.821	744.349	350.748	-96.0914	760.122	378.372	-98.9035	763.752	275.534	-63.834	731.347	176.017
78	0.77	32.7412	1189.13	534.304	105.685	1198.25	573.354	-38.8598	1194.43	576.872	208.911	1046.18	710.898	-131.987	1037.05	734.221	23.4172	1004.19	614.759	288.252	679.213	629.957	258.427	749.878	355.787	185.767	752.911	380.872	191.273	765.701	278.661	171.32	731.917	178.033	-205.877	672.982	622.17	-159.821	744.364	350.759	-96.1014	760.123	378.371	-98.8874	763.748	275.541	-63.8294	731.359	176.041
79	0.78	32.7152	1189.23	534.209	105.657	1198.3	573.327	-38.8973	1194.47	576.86	208.882	1046.22	710.904	-132.027	1037.09	734.22	23.3854	1004.29	614.569	288.067	679.126	629.689	258.411	749.938	355.738	185.764	752.961	380.827	191.245	765.764	278.589	171.29	731.99	177.993	-205.875	673.011	622.198	-159.83	744.405	350.747	-96.1446	760.164	378.364	-98.8784	763.762	275.551	-63.843	731.392	176.01
80	0.79	32.6619	1189.29	534.121	105.626	1198.34	573.308	-38.9137	1194.48	576.836	208.848	1046.26	710.916	-132.063	1037.13	734.214	23.3419	1004.36	614.449	287.847	679.049	629.396	258.372	749.989	355.668	185.754	752.974	380.817	191.22	765.796	278.564	171.255	732.047	177.951	-205.919	673.076	622.256	-159.827	744.425	350.754	-96.1556	760.207	378.339	-98.8859	763.779	275.561	-63.8608	731.421	176.01
81	0.8	32.6139	1189.33	534.071	105.585	1198.38	573.306	-38.9327	1194.49	576.845	208.804	1046.28	710.877	-132.095	1037.15	734.201	23.3005	1004.36	614.441	287.697	679.032	629.207	258.321	750.024	355.624	185.724	752.967	380.824	191.188	765.808	278.548	171.203	732.068	177.92	-205.977	673.125	622.293	-159.831	744.438	350.764	-96.1598	760.226	378.382	-98.8832	763.788	275.565	-63.8839	731.444	176.034
82	0.81	32.5825	1189.34	533.997	105.54	1198.38	573.321	-38.9555	1194.49	576.792	208.767	1046.28	710.833	-132.121	1037.16	734.183	23.2438	1004.33	614.422	287.624	679.021	629.096	258.282	750.025	355.601	185.675	752.964	380.778	191.139	765.803	278.48	171.171	732.07	177.889	-205.996	673.118	622.234	-159.854	744.453	350.734	-96.1793	760.232	378.347	-98.8832	763.771	275.562	-63.8999	731.452	176.031
83	0.82	32.6047	1189.29	534.122	105.518	1198.35	573.356	-38.9523	1194.46	576.763	208.754	1046.27	710.82	-132.142	1037.14	734.151	23.213	1004.26	614.496	287.616	678.995	629.081	258.268	749.986	355.612	185.661	752.923	380.782	191.096	765.753	278.469	171.142	732.044	177.872	-206.004	673.084	622.182	-159.86	744.436	350.732	-96.1776	760.219	378.313	-98.9004	763.771	275.483	-63.9026	731.429	176.015
84	0.83	32.6437	1189.2	534.365	105.53	1198.31	573.428	-38.9577	1194.4	576.804	208.766	1046.24	710.878	-132.131	1037.11	734.196	23.2039	1004.19	614.67	287.712	678.997	629.229	258.288	749.921	355.71	185.68	752.886	380.855	191.108	765.709	278.535	171.15	731.98	177.953	-205.987	673.057	622.195	-159.863	744.391	350.784	-96.1733	760.199	378.387	-98.9146	763.774	275.484	-63.9089	731.401	176.019
85	0.84	32.703	1189.13	534.478	105.575	1198.29	573.501	-38.926	1194.35	576.832	208.775	1046.22	710.931	-132.115	1037.06	734.236	23.2307	1004.13	614.861	287.892	679.046	629.51	258.332	749.864	355.79	185.688	752.864	380.904	191.152	765.673	278.613	171.181	731.921	178.039	-205.944	673.002	622.189	-159.866	744.369	350.797	-96.1852	760.164	378.43	-98.9189	763.764	275.56	-63.9063	731.37	176.052
86	0.85	32.8186	1189.09	534.481	105.636	1198.29	573.532	-38.8553	1194.3	576.799	208.817	1046.19	710.943	-132.086	1037	734.215	23.3087	1004.08	614.948	288.072	679.105	629.742	258.386	749.837	355.814	185.711	752.867	380.896	191.209	765.664	278.645	171.251	731.851	178.083	-205.894	672.98	622.211	-159.842	744.359	350.788	-96.1531	760.113	378.415	-98.9169	763.758	275.554	-63.8726	731.343	176.046
87	0.86	32.9577	1189.06	534.533	105.721	1198.29	573.555	-38.7818	1194.23	576.802	208.859	1046.18	710.957	-132.052	1036.97	734.212	23.4036	1004.07	614.971	288.134	679.124	629.842	258.437	749.824	355.82	185.737	752.884	380.835	191.259	765.669	278.657	171.317	731.839	178.085	-205.865	673.009	622.276	-159.808	744.349	350.794	-96.0987	760.075	378.425	-98.8961	763.765	275.538	-63.8269	731.314	176.066
88	0.87	33.0231	1189.07	534.506	105.784	1198.3	573.574	-38.7315	1194.22	576.761	208.853	1046.19	710.982	-132.041	1036.99	734.224	23.4295	1004.12	614.896	288.025	679.088	629.753	258.449	749.857	355.795	185.761	752.899	380.877	191.286	765.685	278.66	171.341	731.87	178.081	-205.862	672.998	622.272	-159.802	744.368	350.782	-96.0808	760.096	378.412	-98.8911	763.769	275.54	-63.8157	731.324	176.047
89	0.88	33.0107	1189.14	534.281	105.762	1198.32	573.519	-38.7279	1194.26	576.658	208.814	1046.24	710.962	-132.072	1037.02	734.191	23.3807	1004.25	614.692	287.801	679.026	629.501	258.406	749.921	355.76	185.76	752.921	380.893	191.249	765.725	278.578	171.304	731.931	178.034	-205.877	673.022	622.272	-159.805	744.395	350.762	-96.0988	760.149	378.371	-98.8844	763.767	275.551	-63.837	731.369	176.02
90	0.89	32.9978	1189.2	534.139	105.749	1198.35	573.46	-38.7463	1194.29	576.577	208.758	1046.28	710.941	-132.128	1037.09	734.155	23.3275	1004.35	614.527	287.568	678.969	629.22	258.343	749.994	355.712	185.73	752.942	380.869	191.18	765.775	278.49	171.23	732.022	177.926	-205.919	673.053	622.246	-159.825	744.433	350.746	-96.1211	760.2	378.342	-98.8805	763.764	275.557	-63.8699	731.418	175.994
91	0.9	32.9932	1189.24	534.127	105.742	1198.36	573.476	-38.7496	1194.31	576.557	208.723	1046.3	710.931	-132.16	1037.12	734.173	23.2864	1004.39	614.458	287.414	678.923	629.012	258.284	750.028	355.651	185.696	752.961	380.821	191.143	765.802	278.483	171.174	732.088	177.873	-205.964	673.042	622.202	-159.841	744.454	350.738	-96.1334	760.23	378.345	-98.8803	763.766	275.561	-63.8788	731.447	175.997
92	0.91	33.0258	1189.23	534.135	105.734	1198.35	573.448	-38.7373	1194.3	576.542	208.714	1046.3	710.933	-132.158	1037.14	734.184	23.2515	1004.37	614.477	287.395	678.948	629.001	258.258	750.012	355.623	185.685	752.965	380.796	191.136	765.806	278.478	171.152	732.105	177.864	-205.98	673.041	622.194	-159.841	744.448	350.721	-96.1389	760.24	378.31	-98.8739	763.75	275.563	-63.8794	731.461	176.002
93	0.92	33.0668	1189.2	534.134	105.763	1198.34	573.46	-38.7012	1194.28	576.527	208.731	1046.29	710.947	-132.149	1037.12	734.155	23.2581	1004.35	614.484	287.468	678.971	629.114	258.272	749.991	355.635	185.685	752.951	380.785	191.14	765.799	278.46	171.164	732.096	177.85	-205.966	673.029	622.16	-159.817	744.451	350.687	-96.1249	760.241	378.285	-98.8542	763.778	275.477	-63.8632	731.48	175.994
94	0.93	33.1339	1189.16	534.238	105.813	1198.33	573.467	-38.6527	1194.28	576.539	208.773	1046.26	710.963	-132.113	1037.1	734.167	23.3032	1004.29	614.565	287.617	679.002	629.304	258.318	749.943	355.71	185.72	752.94	380.842	191.164	765.781	278.495	171.202	732.052	177.893	-205.929	673.009	622.164	-159.804	744.448	350.719	-96.1204	760.229	378.316	-98.8345	763.801	275.49	-63.857	731.475	175.983
95	0.94	33.2196	1189.09	534.445	105.874	1198.31	573.558	-38.6073	1194.22	576.586	208.816	1046.22	711.01	-132.08	1037.06	734.184	23.3401	1004.24	614.674	287.814	679.065	629.578	258.378	749.883	355.796	185.726	752.925	380.847	191.228	765.737	278.579	171.266	731.979	177.972	-205.889	672.996	622.202	-159.802	744.417	350.774	-96.1049	760.18	378.345	-98.8343	763.785	275.552	-63.8462	731.438	176.037
96	0.95	33.3173	1189.03	534.62	105.945	1198.3	573.641	-38.5301	1194.15	576.656	208.874	1046.19	711.068	-132.043	1037.01	734.173	23.41	1004.17	614.844	287.961	679.128	629.828	258.418	749.832	355.82	185.738	752.917	380.837	191.28	765.72	278.62	171.341	731.898	178.06	-205.866	672.981	622.234	-159.988	744.641	350.594	-96.0709	760.115	378.417	-99.0227	764.051	275.535	-63.8134	731.387	176.091
97	0.96	33.372	1189.02	534.636	106.003	1198.28	573.695	-38.4756	1194.09	576.646	208.895	1046.16	711.055	-132.029	1036.99	734.162	23.4677	1004.1	614.982	287.973	679.128	629.834	258.435	749.818	355.806	185.753	752.904	380.828	191.297	765.697	278.599	171.371	731.849	178.092	-205.884	672.994	622.278	-160.228	744.956	350.312	-96.0621	760.057	378.431	-99.2339	764.403	275.44	-63.8074	731.344	176.08
98	0.97	33.3838	1189.03	534.631	106.01	1198.27	573.68	-38.4835	1194.09	576.614	208.872	1046.16	711.011	-132.052	1036.99	734.128	23.4584	1004.1	614.933	287.84	679.071	629.648	258.403	749.836	355.746	185.741	752.89	380.815	191.269	765.664	278.605	171.334	731.843	178.092	-205.915	672.981	622.241	-159.905	744.478	350.644	-96.0921	760.049	378.436	-98.9709	763.902	275.519	-63.8355	731.327	176.054
99	0.98	33.343	1189.1	534.526	105.979	1198.31	573.641	-38.5221	1194.15	576.612	208.822	1046.2	710.98	-132.101	1037.04	734.088	23.4122	1004.17	614.795	287.638	679.005	629.377	258.344	749.884	355.705	185.709	752.912	380.857	191.216	765.675	278.615	171.265	731.917	178.044	-205.958	673.002	622.226	-159.857	744.396	350.746	-96.1388	760.107	378.443	-98.9415	763.767	275.566	-63.8941	731.359	176.026
100	0.99	33.3003	1189.2	534.356	105.931	1198.36	573.564	-38.5505	1194.24	576.548	208.773	1046.24	710.962	-132.133	1037.1	734.091	23.3392	1004.28	614.584	287.493	678.963	629.169	258.272	749.951	355.654	185.671	752.946	380.859	191.137	765.72	278.54	171.179	732.007	177.949	-205.985	673.038	622.226	-159.872	744.418	350.742	-96.1878	760.18	378.401	-98.9224	763.75	275.564	-63.9308	731.401	176.024
101	1	33.295	1189.32	534.176	105.91	1198.42	573.478	-38.536	1194.33	576.446	208.747	1046.28	710.933	-132.143	1037.15	734.071	23.2906	1004.37	614.428	287.404	678.913	629.04	258.222	750.022	355.609	185.631	752.967	380.784	191.068	765.793	278.417	171.106	732.077	177.856	-205.987	673.082	622.218	-159.882	744.469	350.723	-96.2017	760.222	378.368	-98.9321	763.758	275.536	-63.936	731.436	176.006
102	1.01	33.3566	1189.37	534.131	105.956	1198.47	573.478	-38.4767	1194.39	576.399	208.788	1046.32	710.937	-132.108	1037.19	734.049	23.3049	1004.44	614.339	287.406	678.888	629.009	258.238	750.038	355.608	185.635	752.987	380.764	191.097	765.812	278.427	171.121	732.121	177.848	-205.977	673.124	622.249	-159.863	744.515	350.711	-96.1684	760.265	378.33	-98.9054	763.792	275.518	-63.9058	731.47	176.009
103	1.02	33.4768	1189.37	534.177	106.064	1198.46	573.534	-38.3775	1194.41	576.369	208.871	1046.31	710.94	-132.039	1037.19	734.085	23.3898	1004.44	614.385	287.562	678.928	629.181	258.326	749.99	355.68	185.695	752.987	380.779	191.175	765.795	278.51	171.189	732.102	177.869	-205.927	673.138	622.279	-159.8	744.516	350.7	-96.1061	760.276	378.302	-98.8291	763.808	275.536	-63.8517	731.475	175.998
104	1.03	33.5927	1189.3	534.306	106.175	1198.42	573.604	-38.2795	1194.35	576.382	208.947	1046.27	710.972	-131.964	1037.14	734.121	23.481	1004.36	614.525	287.781	678.985	629.453	258.413	749.905	355.758	185.757	752.967	380.815	191.259	765.744	278.581	171.272	732.002	177.951	-205.862	673.138	622.268	-159.754	744.476	350.69	-96.059	760.242	378.28	-98.7853	763.789	275.511	-63.807	731.448	175.999
105	1.04	33.6921	1189.21	534.538	106.253	1198.41	573.703	-38.213	1194.28	576.426	208.992	1046.23	711.015	-131.93	1037.1	734.122	23.5621	1004.23	614.79	287.978	679.035	629.713	258.453	749.849	355.788	185.778	752.919	380.879	191.3	765.695	278.646	171.324	731.909	178.042	-205.827	673.09	622.22	-159.729	744.432	350.708	-96.0379	760.18	378.33	-98.7921	763.799	275.51	-63.7801	731.4	176.02
106	1.05	33.7621	1189.15	534.734	106.303	1198.39	573.753	-38.1885	1194.22	576.531	209.016	1046.19	711.039	-131.914	1037.07	734.137	23.592	1004.16	614.918	288.048	679.054	629.804	258.478	749.821	355.835	185.772	752.892	380.89	191.32	765.666	278.69	171.352	731.856	178.114	-205.836	673.008	622.156	-159.74	744.389	350.752	-96.0274	760.122	378.388	-98.824	763.797	275.534	-63.791	731.35	176.061
107	1.06	33.7792	1189.14	534.651	106.314	1198.39	573.755	-38.1895	1194.18	576.559	209.008	1046.16	711.02	-131.923	1037.05	734.119	23.5934	1004.14	614.903	287.943	678.995	629.674	258.454	749.803	355.798	185.776	752.869	380.888	191.3	765.642	278.67	171.334	731.847	178.086	-205.865	672.95	622.13	-159.761	744.358	350.76	-96.0396	760.095	378.379	-98.831	763.771	275.547	-63.8164	731.33	176.048
108	1.07	33.7864	1189.19	534.567	106.313	1198.41	573.748	-38.1939	1194.22	576.564	208.991	1046.16	710.996	-131.934	1037.06	734.13	23.5842	1004.13	614.855	287.795	678.972	629.511	258.411	749.834	355.757	185.781	752.867	380.889	191.271	765.657	278.628	171.293	731.881	178.01	-205.907	672.965	622.173	-159.78	744.352	350.754	-96.0564	760.108	378.381	-98.8167	763.735	275.581	-63.8306	731.333	176.032
109	1.08	33.7757	1189.27	534.565	106.311	1198.45	573.728	-38.1905	1194.29	576.537	208.972	1046.19	710.979	-131.939	1037.11	734.127	23.554	1004.21	614.747	287.638	678.921	629.284	258.377	749.877	355.713	185.77	752.892	380.879	191.243	765.69	278.615	171.273	731.937	177.975	-205.953	673.065	622.25	-159.787	744.369	350.76	-96.0797	760.146	378.358	-98.8267	763.719	275.601	-63.8561	731.362	176.048
110	1.09	33.7741	1189.38	534.456	106.294	1198.5	573.612	-38.1981	1194.4	576.464	208.961	1046.23	710.962	-131.956	1037.17	734.087	23.5237	1004.33	614.588	287.512	678.863	629.079	258.343	749.943	355.648	185.757	752.937	380.841	191.218	765.762	278.526	171.231	732.015	177.93	-205.955	673.158	622.278	-159.801	744.424	350.744	-96.1104	760.199	378.368	-98.8454	763.728	275.577	-63.8823	731.412	176.027
111	1.1	33.8115	1189.51	534.325	106.283	1198.58	573.521	-38.1806	1194.48	576.411	208.962	1046.26	710.954	-131.946	1037.22	734.088	23.5054	1004.4	614.497	287.474	678.869	629.055	258.312	750.012	355.628	185.742	752.986	380.813	191.188	765.827	278.46	171.191	732.089	177.86	-205.924	673.211	622.292	-159.802	744.481	350.718	-96.1246	760.248	378.359	-98.8318	763.777	275.549	-63.8879	731.477	176
112	1.11	33.8264	1189.58	534.22	106.299	1198.62	573.525	-38.1538	1194.54	576.378	208.987	1046.27	710.983	-131.925	1037.24	734.109	23.5116	1004.43	614.509	287.523	678.89	629.166	258.322	750.027	355.663	185.75	753.019	380.837	191.201	765.849	278.483	171.171	732.131	177.835	-205.888	673.254	622.362	-159.79	744.516	350.732	-96.1202	760.271	378.358	-98.8041	763.815	275.563	-63.8796	731.507	176.01
113	1.12	33.8808	1189.59	534.299	106.353	1198.61	573.55	-38.1223	1194.55	576.361	209.029	1046.25	710.998	-131.905	1037.23	734.099	23.5376	1004.43	614.497	287.634	678.899	629.309	258.358	749.977	355.705	185.758	753.014	380.849	191.213	765.823	278.5	171.186	732.116	177.852	-205.865	673.246	622.372	-159.764	744.51	350.729	-96.0949	760.278	378.313	-98.8031	763.823	275.576	-63.8575	731.507	176.012
114	1.13	33.9176	1189.54	534.37	106.389	1198.58	573.568	-38.084	1194.5	576.398	209.068	1046.2	710.968	-131.885	1037.2	734.069	23.5681	1004.37	614.52	287.812	678.96	629.551	258.39	749.897	355.739	185.755	752.969	380.848	191.208	765.763	278.516	171.217	732.041	177.912	-205.831	673.184	622.295	-159.766	744.471	350.701	-96.0672	760.225	378.299	-98.8209	763.802	275.524	-63.8576	731.458	175.985
115	1.14	33.9496	1189.44	534.547	106.433	1198.55	573.666	-38.0524	1194.43	576.48	209.09	1046.15	710.986	-131.871	1037.15	734.054	23.6035	1004.23	614.748	287.94	678.999	629.756	258.391	749.814	355.782	185.71	752.917	380.832	191.213	765.699	278.572	171.243	731.943	177.954	-205.835	673.092	622.223	-159.786	744.418	350.703	-96.0872	760.153	378.353	-98.8493	763.761	275.526	-63.8739	731.399	175.991
116	1.15	33.9811	1189.41	534.735	106.476	1198.55	573.782	-38.0533	1194.37	576.591	209.091	1046.11	711.016	-131.869	1037.11	734.101	23.6188	1004.13	614.977	287.952	678.985	629.771	258.378	749.765	355.819	185.709	752.871	380.872	191.225	765.641	278.653	171.252	731.874	178.012	-205.87	673.017	622.157	-159.808	744.376	350.753	-96.1049	760.094	378.437	-98.8804	763.731	275.551	-63.8842	731.339	176.05
117	1.16	34.0298	1189.42	534.829	106.501	1198.56	573.826	-38.0601	1194.34	576.602	209.093	1046.09	711.015	-131.856	1037.1	734.096	23.6198	1004.09	615.059	287.843	678.908	629.578	258.368	749.759	355.784	185.715	752.848	380.899	191.241	765.618	278.691	171.271	731.847	178.047	-205.926	673.006	622.14	-159.821	744.356	350.787	-96.1171	760.066	378.454	-98.8902	763.711	275.599	-63.8987	731.308	176.056
118	1.17	34.0762	1189.51	534.642	106.535	1198.59	573.803	-38.0314	1194.37	576.512	209.083	1046.1	710.966	-131.85	1037.12	734.069	23.64	1004.12	614.95	287.655	678.794	629.274	258.355	749.789	355.695	185.72	752.858	380.856	191.24	765.636	278.64	171.28	731.867	178.023	-205.964	673.07	622.193	-159.796	744.364	350.785	-96.1193	760.093	378.395	-98.8819	763.706	275.586	-63.9019	731.303	176.039
119	1.18	34.1219	1189.65	534.476	106.585	1198.65	573.75	-37.993	1194.46	576.421	209.088	1046.14	710.937	-131.833	1037.16	734.062	23.6669	1004.22	614.769	287.495	678.723	629.055	258.356	749.853	355.658	185.744	752.903	380.833	191.279	765.682	278.599	171.281	731.923	177.99	-205.978	673.17	622.264	-159.782	744.408	350.739	-96.0947	760.141	378.359	-98.8483	763.729	275.578	-63.8746	731.35	176.021
120	1.19	34.1521	1189.77	534.379	106.625	1198.71	573.713	-37.9522	1194.56	576.365	209.109	1046.19	710.943	-131.808	1037.21	734.061	23.6761	1004.34	614.626	287.446	678.72	629.031	258.377	749.92	355.67	185.784	752.954	380.858	191.286	765.734	278.597	171.279	732	177.962	-205.954	673.244	622.273	-159.747	744.457	350.733	-96.0565	760.205	378.328	-98.8078	763.785	275.556	-63.8308	731.422	176.015
121	1.2	34.1684	1189.85	534.295	106.641	1198.77	573.674	-37.9232	1194.63	576.308	209.125	1046.22	710.917	-131.789	1037.25	734.054	23.6781	1004.42	614.471	287.485	678.744	629.13	258.387	749.951	355.672	185.8	752.983	380.846	191.265	765.801	278.509	171.258	732.058	177.911	-205.906	673.288	622.283	-159.73	744.502	350.7	-96.0326	760.264	378.284	-98.7732	763.803	275.553	-63.8066	731.472	175.982
122	1.21	34.165	1189.92	534.194	106.636	1198.79	573.649	-37.921	1194.66	576.273	209.139	1046.23	710.9	-131.78	1037.26	734.043	23.6703	1004.44	614.408	287.56	678.757	629.236	258.397	749.944	355.695	185.797	752.971	380.86	191.25	765.816	278.484	171.252	732.087	177.867	-205.849	673.272	622.293	-159.746	744.526	350.687	-96.04	760.292	378.255	-98.7704	763.811	275.555	-63.8117	731.479	175.981
123	1.22	34.1471	1189.93	534.191	106.62	1198.77	573.665	-37.9398	1194.65	576.291	209.138	1046.21	710.92	-131.792	1037.24	734.034	23.6494	1004.39	614.516	287.667	678.79	629.385	258.4	749.892	355.763	185.762	752.946	380.863	191.234	765.791	278.533	171.227	732.073	177.901	-205.824	673.199	622.288	-159.763	744.511	350.71	-96.057	760.284	378.295	-98.7918	763.797	275.561	-63.8344	731.461	176.003
124	1.23	34.1359	1189.89	534.267	106.606	1198.73	573.672	-37.9605	1194.6	576.331	209.125	1046.17	710.914	-131.805	1037.22	734.026	23.6169	1004.31	614.549	287.795	678.831	629.557	258.379	749.831	355.792	185.721	752.894	380.864	191.198	765.728	278.552	171.194	732.032	177.918	-205.812	673.08	622.184	-159.783	744.467	350.719	-96.081	760.247	378.309	-98.8244	763.761	275.549	-63.8553	731.427	176.002
125	1.24	34.1482	1189.82	534.329	106.606	1198.69	573.658	-37.9789	1194.56	576.325	209.126	1046.13	710.898	-131.807	1037.18	734.003	23.6068	1004.23	614.581	287.85	678.838	629.622	258.372	749.769	355.787	185.702	752.857	380.885	191.197	765.668	278.606	171.199	731.964	177.95	-205.825	673.019	622.124	-159.797	744.431	350.74	-96.1023	760.19	378.332	-98.8486	763.727	275.544	-63.8777	731.367	176.001
126	1.25	34.1618	1189.75	534.442	106.63	1198.65	573.705	-37.9955	1194.54	576.354	209.124	1046.1	710.883	-131.806	1037.15	733.997	23.6135	1004.13	614.713	287.786	678.797	629.544	258.37	749.743	355.775	185.712	752.839	380.917	191.209	765.644	278.646	171.223	731.905	177.971	-205.854	673.015	622.153	-159.801	744.395	350.771	-96.1129	760.129	378.417	-98.8654	763.711	275.571	-63.8849	731.332	175.991
127	1.26	34.1945	1189.71	534.561	106.656	1198.64	573.753	-37.9819	1194.51	576.373	209.117	1046.08	710.873	-131.804	1037.15	733.998	23.638	1004.08	614.828	287.697	678.774	629.425	258.352	749.752	355.743	185.723	752.841	380.908	191.212	765.649	278.646	171.26	731.862	178.02	-205.879	673.056	622.202	-159.805	744.372	350.795	-96.1017	760.075	378.46	-98.8661	763.712	275.607	-63.8705	731.307	176.025
128	1.27	34.2388	1189.71	534.496	106.688	1198.63	573.727	-37.9427	1194.51	576.299	209.116	1046.08	710.839	-131.793	1037.15	733.986	23.6873	1004.1	614.799	287.603	678.779	629.32	258.342	749.791	355.685	185.734	752.869	380.86	191.238	765.661	278.629	171.297	731.854	178.048	-205.922	673.133	622.246	-159.782	744.372	350.78	-96.0871	760.064	378.433	-98.8599	763.707	275.598	-63.8462	731.302	176.038
129	1.28	34.2661	1189.76	534.348	106.723	1198.64	573.661	-37.8886	1194.53	576.243	209.118	1046.11	710.808	-131.796	1037.19	733.97	23.7021	1004.15	614.669	287.505	678.757	629.184	258.355	749.842	355.658	185.76	752.892	380.869	191.286	765.693	278.64	171.298	731.894	178.016	-205.919	673.171	622.222	-159.755	744.398	350.758	-96.0853	760.106	378.391	-98.8425	763.725	275.549	-63.8264	731.347	176.03
130	1.29	34.2479	1189.85	534.229	106.727	1198.68	573.597	-37.8683	1194.58	576.211	209.108	1046.16	710.791	-131.809	1037.24	733.987	23.6615	1004.25	614.506	287.464	678.726	629.116	258.366	749.883	355.682	185.759	752.92	380.85	191.276	765.734	278.608	171.281	731.967	177.947	-205.922	673.255	622.298	-159.754	744.445	350.747	-96.0626	760.165	378.378	-98.8186	763.75	275.543	-63.82	731.391	176.028
131	1.3	34.2247	1189.9	534.155	106.7	1198.7	573.512	-37.8952	1194.63	576.155	209.086	1046.19	710.78	-131.816	1037.25	733.976	23.6042	1004.32	614.397	287.5	678.73	629.155	258.364	749.903	355.699	185.747	752.934	380.83	191.244	765.766	278.542	171.246	732.031	177.906	-205.937	673.281	622.303	-159.759	744.479	350.701	-96.0593	760.223	378.325	-98.8016	763.764	275.511	-63.8342	731.422	176.007
132	1.31	34.2004	1189.91	534.074	106.663	1198.69	573.473	-37.9381	1194.65	576.101	209.071	1046.2	710.763	-131.835	1037.26	733.952	23.5544	1004.34	614.33	287.606	678.765	629.299	258.338	749.882	355.701	185.716	752.929	380.811	191.192	765.772	278.478	171.199	732.056	177.867	-205.926	673.197	622.166	-159.785	744.486	350.667	-96.0827	760.258	378.26	-98.8013	763.75	275.494	-63.8634	731.444	175.966
133	1.32	34.1752	1189.89	534.094	106.623	1198.67	573.496	-37.9742	1194.63	576.107	209.046	1046.19	710.758	-131.863	1037.25	733.936	23.5241	1004.29	614.413	287.71	678.795	629.432	258.332	749.848	355.732	185.687	752.911	380.822	191.149	765.738	278.503	171.152	732.047	177.879	-205.945	673.136	622.133	-159.816	744.475	350.72	-96.0976	760.252	378.281	-98.8242	763.741	275.535	-63.8766	731.438	175.977
134	1.33	34.1673	1189.85	534.141	106.62	1198.64	573.526	-37.9993	1194.6	576.15	209.022	1046.17	710.775	-131.878	1037.21	733.93	23.4925	1004.2	614.554	287.789	678.81	629.506	258.33	749.814	355.76	185.685	752.89	380.859	191.144	765.708	278.549	171.145	732.02	177.896	-205.936	673.058	622.081	-159.84	744.452	350.756	-96.13	760.222	378.333	-98.844	763.74	275.559	-63.8829	731.425	175.962
135	1.34	34.1979	1189.8	534.196	106.638	1198.61	573.563	-37.9948	1194.56	576.143	209.013	1046.15	710.759	-131.889	1037.17	733.918	23.4915	1004.14	614.589	287.811	678.827	629.536	258.326	749.789	355.755	185.69	752.855	380.856	191.142	765.677	278.538	171.175	731.974	177.944	-205.92	673.004	622.024	-159.832	744.409	350.74	-96.1463	760.183	378.343	-98.8689	763.734	275.546	-63.8898	731.392	175.961
136	1.35	34.2624	1189.74	534.283	106.674	1198.6	573.629	-37.9645	1194.54	576.109	209.009	1046.14	710.733	-131.893	1037.14	733.918	23.545	1004.12	614.655	287.74	678.823	629.489	258.352	749.791	355.76	185.726	752.847	380.886	191.192	765.662	278.579	171.238	731.925	178.005	-205.921	673.023	622.057	-159.811	744.397	350.742	-96.1205	760.148	378.352	-98.8816	763.739	275.54	-63.8694	731.364	176.004
137	1.36	34.3397	1189.74	534.34	106.736	1198.63	573.698	-37.9178	1194.53	576.078	209.018	1046.14	710.733	-131.892	1037.12	733.913	23.6059	1004.09	614.688	287.628	678.767	629.345	258.377	749.813	355.773	185.771	752.866	380.918	191.279	765.654	278.678	171.307	731.883	178.065	-205.934	673.063	622.163	-159.774	744.399	350.753	-96.0752	760.104	378.389	-98.8758	763.77	275.536	-63.8376	731.345	176.044
138	1.37	34.385	1189.76	534.287	106.778	1198.63	573.709	-37.8961	1194.53	576.049	209.016	1046.17	710.707	-131.893	1037.12	733.898	23.6288	1004.07	614.646	287.546	678.752	629.222	258.389	749.85	355.726	185.792	752.886	380.86	191.321	765.667	278.666	171.362	731.866	178.085	-205.933	673.086	622.222	-159.754	744.387	350.737	-96.0392	760.083	378.382	-98.8542	763.78	275.486	-63.7999	731.331	176.043
139	1.38	34.3567	1189.8	534.161	106.743	1198.66	573.621	-37.9248	1194.55	575.941	208.986	1046.18	710.647	-131.918	1037.12	733.861	23.5845	1004.08	614.504	287.51	678.778	629.209	258.381	749.872	355.676	185.771	752.899	380.821	191.305	765.687	278.608	171.33	731.894	177.996	-205.943	673.054	622.206	-159.764	744.378	350.716	-96.0459	760.104	378.316	-98.8616	763.764	275.472	-63.8055	731.34	176
140	1.39	34.2699	1189.84	534.11	106.656	1198.66	573.582	-37.9964	1194.56	575.892	208.931	1046.22	710.663	-131.976	1037.09	733.818	23.4841	1004.08	614.425	288.102	679.219	630.304	258.336	749.861	355.677	185.737	752.895	380.873	191.227	765.692	278.586	171.245	731.945	177.946	-205.932	672.977	622.153	-159.792	744.386	350.72	-96.0926	760.13	378.301	-98.8626	763.74	275.506	-63.8483	731.359	175.989
141	1.4	34.1494	1189.88	534.093	106.541	1198.68	573.565	-38.0799	1194.57	575.935	208.887	1046.24	710.682	-132.024	1037.08	733.799	23.3587	1004.05	614.422	288.884	679.787	631.732	258.284	749.844	355.68	185.668	752.884	380.87	191.133	765.67	278.519	171.17	731.986	177.93	-205.903	672.904	622.137	-159.825	744.386	350.754	-96.1522	760.155	378.373	-98.8804	763.737	275.547	-63.9082	731.38	175.989
142	1.41	34.0642	1189.92	534.023	106.429	1198.74	573.48	-38.1619	1194.57	575.937	208.874	1046.26	710.645	-132.035	1037.07	733.779	23.3138	1004.05	614.375	287.957	679.078	629.986	258.279	749.836	355.715	185.624	752.88	380.816	191.091	765.683	278.51	171.124	732.01	177.891	-205.855	672.832	622.093	-159.851	744.399	350.773	-96.1878	760.182	378.392	-98.8919	763.757	275.566	-63.9402	731.394	175.99
143	1.42	34.0674	1189.94	533.947	106.403	1198.78	573.442	-38.1972	1194.57	575.88	208.888	1046.26	710.611	-132.016	1037.07	733.788	23.359	1004.07	614.328	287.801	678.932	629.653	258.313	749.835	355.746	185.655	752.882	380.822	191.112	765.706	278.507	171.125	732.019	177.896	-205.793	672.838	622.134	-159.831	744.417	350.746	-96.1516	760.193	378.361	-98.865	763.767	275.549	-63.9238	731.393	175.968
144	1.43	34.0775	1189.98	533.894	106.448	1198.8	573.445	-38.17	1194.57	575.812	208.922	1046.26	710.587	-131.971	1037.07	733.802	23.4409	1004.06	614.36	287.818	678.926	629.606	258.36	749.851	355.762	185.708	752.907	380.839	191.184	765.721	278.543	171.193	732.003	177.929	-205.745	672.842	622.158	-159.793	744.41	350.742	-96.0913	760.193	378.337	-98.8414	763.769	275.54	-63.8769	731.407	175.98
145	1.44	34.082	1190.01	533.814	106.47	1198.81	573.415	-38.1403	1194.57	575.756	208.951	1046.26	710.524	-131.949	1037.07	733.794	23.4855	1004.12	614.276	287.833	678.926	629.593	258.404	749.874	355.784	185.743	752.936	380.824	191.24	765.745	278.549	171.258	732.011	177.942	-205.702	672.844	622.171	-159.76	744.406	350.774	-96.0375	760.185	378.343	-98.8322	763.786	275.527	-63.8423	731.416	176
146	1.45	34.0551	1190	533.766	106.455	1198.8	573.356	-38.1583	1194.55	575.748	208.946	1046.25	710.472	-131.966	1037.07	733.772	23.4783	1004.14	614.225	287.755	678.868	629.457	258.402	749.874	355.732	185.749	752.928	380.818	191.243	765.737	278.534	171.276	732.01	177.937	-205.694	672.836	622.189	-159.744	744.418	350.755	-96.0243	760.157	378.359	-98.8229	763.757	275.547	-63.8282	731.409	175.993
147	1.46	34.0228	1189.92	533.875	106.415	1198.76	573.366	-38.2133	1194.5	575.832	208.918	1046.23	710.47	-131.99	1037.05	733.779	23.4378	1004.03	614.348	287.685	678.814	629.307	258.364	749.859	355.706	185.735	752.883	380.855	191.241	765.696	278.599	171.28	731.966	177.997	-205.721	672.804	622.203	-159.765	744.39	350.773	-96.0516	760.103	378.407	-98.8512	763.739	275.56	-63.8434	731.371	176.013
148	1.47	33.9806	1189.85	534.032	106.344	1198.72	573.372	-38.2877	1194.47	575.906	208.88	1046.23	710.453	-132.029	1037.03	733.783	23.3756	1003.9	614.561	287.632	678.804	629.233	258.322	749.83	355.707	185.719	752.831	380.895	191.211	765.63	278.669	171.267	731.9	178.055	-205.78	672.759	622.19	-159.804	744.348	350.817	-96.0871	760.061	378.493	-98.8835	763.717	275.583	-63.877	731.334	176.037
149	1.48	33.9171	1189.81	534.08	106.301	1198.7	573.362	-38.3368	1194.45	575.906	208.857	1046.22	710.394	-132.069	1037.01	733.732	23.3112	1003.82	614.581	287.607	678.808	629.198	258.295	749.793	355.685	185.692	752.797	380.893	191.177	765.592	278.647	171.231	731.86	178.051	-205.809	672.72	622.159	-159.823	744.314	350.827	-96.1073	760.036	378.478	-98.9133	763.701	275.561	-63.8851	731.309	176.02
150	1.49	33.8837	1189.82	534.008	106.278	1198.69	573.33	-38.3548	1194.48	575.868	208.849	1046.23	710.35	-132.079	1037	733.695	23.2919	1003.81	614.508	287.649	678.824	629.218	258.302	749.78	355.67	185.683	752.8	380.897	191.173	765.578	278.627	171.232	731.842	178.029	-205.795	672.694	622.099	-159.826	744.312	350.809	-96.1025	760.041	378.427	-98.9206	763.706	275.534	-63.8832	731.304	176.003
151	1.5	33.8723	1189.93	533.9	106.262	1198.73	573.273	-38.3496	1194.57	575.799	208.847	1046.27	710.332	-132.088	1037.02	733.669	23.2758	1003.89	614.316	287.728	678.856	629.319	258.322	749.806	355.705	185.707	752.841	380.894	191.198	765.619	278.631	171.231	731.903	177.993	-205.763	672.738	622.15	-159.808	744.363	350.763	-96.0996	760.113	378.385	-98.894	763.747	275.533	-63.8671	731.349	176.006
152	1.51	33.8544	1190.12	533.73	106.231	1198.84	573.234	-38.3412	1194.69	575.731	208.848	1046.33	710.317	-132.088	1037.05	733.655	23.2552	1004.04	614.087	287.834	678.927	629.509	258.338	749.869	355.735	185.732	752.908	380.876	191.184	765.723	278.547	171.203	731.996	177.948	-205.704	672.799	622.237	-159.784	744.44	350.741	-96.0995	760.199	378.32	-98.8612	763.817	275.521	-63.8546	731.419	176.006
153	1.52	33.8525	1190.32	533.574	106.236	1198.95	573.227	-38.3351	1194.8	575.629	208.844	1046.38	710.288	-132.098	1037.08	733.628	23.2418	1004.17	613.864	287.903	678.981	629.616	258.353	749.926	355.729	185.745	752.977	380.837	191.159	765.807	278.45	171.201	732.084	177.9	-205.654	672.83	622.265	-159.771	744.502	350.704	-96.0827	760.271	378.294	-98.8381	763.859	275.512	-63.8583	731.487	175.984
154	1.53	33.8632	1190.43	533.58	106.246	1199.03	573.261	-38.3269	1194.84	575.618	208.828	1046.39	710.258	-132.107	1037.07	733.613	23.2315	1004.19	613.74	288.488	679.397	630.637	258.359	749.952	355.702	185.736	752.997	380.757	191.158	765.83	278.421	171.204	732.115	177.85	-205.641	672.802	622.23	-159.766	744.51	350.676	-96.0738	760.284	378.246	-98.8394	763.867	275.472	-63.8439	731.504	175.951
155	1.54	33.8755	1190.42	533.744	106.223	1199.04	573.336	-38.334	1194.81	575.665	208.799	1046.36	710.237	-132.136	1037.02	733.59	23.1964	1004.1	613.842	289.736	680.325	632.929	258.352	749.921	355.69	185.702	752.952	380.743	191.158	765.789	278.431	171.198	732.063	177.844	-205.668	672.695	622.17	-159.784	744.45	350.702	-96.0901	760.231	378.259	-98.8575	763.815	275.477	-63.8491	731.435	175.956
156	1.55	33.8681	1190.39	533.972	106.237	1199.02	573.529	-38.3907	1194.76	575.786	208.756	1046.32	710.22	-132.182	1036.93	733.58	23.1471	1003.92	614.064	289.459	680.16	632.416	258.317	749.86	355.676	185.664	752.875	380.764	191.144	765.703	278.522	171.183	731.961	177.91	-205.542	672.645	621.988	-159.82	744.369	350.762	-96.1213	760.141	378.341	-98.8842	763.755	275.474	-63.8941	731.357	175.964
157	1.56	33.8672	1190.36	534.257	106.251	1199.03	573.762	-38.4527	1194.75	575.948	208.706	1046.29	710.236	-132.236	1036.85	733.572	23.1098	1003.73	614.346	288.203	679.305	630.074	258.276	749.809	355.675	185.654	752.826	380.832	191.125	765.603	278.626	171.18	731.858	177.998	-205.168	672.784	621.801	-159.865	744.295	350.811	-96.1758	760.057	378.409	-98.9378	763.726	275.498	-63.9284	731.293	176.011
158	1.57	33.8794	1190.43	534.429	106.266	1199.09	573.971	-38.4835	1194.79	576.063	208.672	1046.27	710.249	-132.261	1036.81	733.568	23.1197	1003.59	614.574	288.473	679.539	630.531	258.25	749.782	355.666	185.649	752.797	380.872	191.109	765.572	278.644	171.196	731.79	178.048	-205.261	672.673	621.786	-159.889	744.253	350.852	-96.1954	760.003	378.499	-98.9647	763.717	275.535	-63.9458	731.258	176.042
159	1.58	33.9161	1190.6	534.475	106.317	1199.25	574.147	-38.4566	1194.9	576.123	208.676	1046.3	710.244	-132.246	1036.8	733.587	23.1529	1003.64	614.511	289.727	680.494	632.842	258.293	749.807	355.67	185.673	752.834	380.879	191.148	765.598	278.643	171.244	731.81	178.047	-205.622	672.464	621.961	-159.844	744.267	350.845	-96.1489	760.004	378.499	-98.9451	763.743	275.52	-63.9118	731.281	176.016
160	1.59	33.9657	1190.86	534.388	106.356	1199.49	574.18	-38.3824	1195.1	576.116	208.707	1046.36	710.226	-132.221	1036.83	733.581	23.2126	1003.82	614.286	289.5	680.309	632.427	258.365	749.872	355.708	185.747	752.913	380.853	191.243	765.685	278.626	171.301	731.877	178.043	-205.629	672.493	622.106	-159.772	744.34	350.806	-96.0814	760.08	378.413	-98.8879	763.796	275.5	-63.8553	731.349	176.002
161	1.6	33.9834	1191.16	534.246	106.346	1199.8	574.177	-38.3261	1195.32	576.114	208.744	1046.42	710.21	-132.207	1036.88	733.564	23.23	1004.03	613.944	288.898	679.845	631.287	258.416	749.952	355.705	185.815	752.998	380.811	191.29	765.784	278.53	171.314	731.985	177.946	-205.576	672.599	622.266	-159.714	744.418	350.737	-96.01	760.198	378.314	-98.8255	763.839	275.473	-63.8	731.445	175.963
162	1.61	33.9511	1191.45	534.181	106.294	1200.1	574.257	-38.3463	1195.5	576.195	208.751	1046.46	710.195	-132.23	1036.92	733.563	23.1846	1004.2	613.667	289.335	680.177	632.071	258.414	750.018	355.697	185.811	753.07	380.752	191.267	765.857	278.44	171.286	732.113	177.836	-205.521	672.576	622.243	-159.708	744.485	350.703	-95.9843	760.291	378.239	-98.7939	763.888	275.447	-63.7785	731.515	175.926
163	1.62	33.8885	1191.69	534.266	106.207	1200.33	574.447	-38.4242	1195.66	576.385	208.715	1046.47	710.245	-132.278	1036.92	733.594	23.104	1004.21	613.653	288.374	679.506	630.238	258.363	750.033	355.687	185.745	753.064	380.717	191.19	765.869	278.38	171.221	732.149	177.799	-205.511	672.48	622.173	-159.75	744.511	350.722	-96.0229	760.287	378.278	-98.8046	763.879	275.439	-63.8177	731.517	175.915
164	1.63	33.8039	1191.85	534.551	106.111	1200.5	574.72	-38.5218	1195.77	576.652	208.651	1046.44	710.278	-132.351	1036.85	733.61	22.9925	1004.07	613.879	288.1	679.335	629.692	258.31	749.985	355.697	185.679	752.978	380.758	191.124	765.805	278.43	171.16	732.096	177.798	-205.345	672.473	622.053	-159.804	744.457	350.77	-96.1032	760.227	378.358	-98.8648	763.833	275.454	-63.8955	731.459	175.925
165	1.64	33.7725	1191.99	534.879	106.054	1200.64	575.053	-38.6041	1195.83	576.993	208.587	1046.4	710.299	-132.419	1036.74	733.621	22.9095	1003.9	614.172	288.025	679.324	629.503	258.269	749.904	355.676	185.659	752.898	380.811	191.075	765.696	278.493	171.125	731.97	177.873	-204.918	672.607	621.846	-159.844	744.373	350.82	-96.1615	760.128	378.426	-98.9263	763.764	275.499	-63.9505	731.378	175.959
166	1.65	33.7976	1192.2	535.286	106.079	1200.81	575.417	-38.6488	1195.94	577.298	208.552	1046.38	710.316	-132.442	1036.66	733.659	22.9074	1003.76	614.442	288.05	679.383	629.433	258.277	749.85	355.649	185.676	752.852	380.874	191.091	765.598	278.574	171.158	731.856	177.968	-204.825	672.563	621.706	-159.859	744.287	350.858	-96.1775	760.034	378.471	-98.9501	763.719	275.506	-63.9572	731.3	175.972
167	1.66	33.888	1192.44	535.665	106.144	1201.02	575.761	-38.6248	1196.09	577.525	208.55	1046.36	710.316	-132.435	1036.59	733.683	22.9959	1003.7	614.661	288.123	679.47	629.398	258.327	749.851	355.592	185.714	752.855	380.847	191.153	765.568	278.621	171.221	731.775	178.024	-204.981	672.446	621.738	-160.022	744.525	350.655	-96.1227	759.963	378.504	-99.1011	764.002	275.436	-63.9097	731.254	175.989
168	1.67	33.9887	1192.77	535.901	106.18	1201.29	576.026	-38.5877	1196.27	577.72	208.554	1046.39	710.313	-132.421	1036.59	733.695	23.0792	1003.79	614.591	288.775	679.978	630.407	258.381	749.897	355.542	185.759	752.926	380.771	191.197	765.628	278.549	171.266	731.778	178.031	-205.375	672.288	621.979	-160.22	744.886	350.376	-96.0682	759.977	378.472	-99.2698	764.381	275.383	-63.848	731.272	176.009
169	1.68	34.038	1193.15	536.115	106.18	1201.58	576.271	-38.5532	1196.52	577.921	208.556	1046.46	710.345	-132.416	1036.62	733.735	23.1254	1003.97	614.407	289.629	680.602	631.729	258.447	749.987	355.531	185.839	753.027	380.754	191.236	765.708	278.472	171.266	731.854	177.968	-205.428	672.317	622.107	-159.858	744.505	350.686	-96.0056	760.064	378.395	-98.9482	763.971	275.449	-63.8188	731.344	175.999
170	1.69	34.0666	1193.5	536.375	106.15	1201.85	576.59	-38.5366	1196.82	578.148	208.547	1046.53	710.41	-132.43	1036.64	733.775	23.1137	1004.12	614.274	289.472	680.442	631.051	258.502	750.061	355.506	185.91	753.118	380.722	191.233	765.762	278.414	171.239	731.946	177.898	-205.418	672.364	622.183	-159.748	744.446	350.741	-95.9932	760.158	378.364	-98.8549	763.887	275.464	-63.8096	731.407	175.991
171	1.7	34.0131	1193.89	536.511	106.103	1202.12	576.941	-38.5879	1197.12	578.364	208.516	1046.55	710.454	-132.478	1036.67	733.811	23.0356	1004.2	614.178	290.492	681.129	632.537	258.515	750.122	355.437	185.936	753.175	380.681	191.194	765.801	278.331	171.168	732.028	177.801	-205.423	672.345	622.134	-159.734	744.457	350.709	-96.0294	760.22	378.326	-98.8495	763.846	275.468	-63.8232	731.445	175.968
172	1.71	33.915	1194.27	536.731	106.038	1202.4	577.242	-38.6792	1197.38	578.639	208.481	1046.55	710.519	-132.537	1036.67	733.85	22.9652	1004.18	614.23	290.83	681.377	632.801	258.516	750.171	355.342	185.947	753.238	380.653	191.145	765.817	278.249	171.083	732.062	177.74	-205.271	672.367	621.946	-159.768	744.469	350.71	-96.08	760.233	378.298	-98.8562	763.831	275.453	-63.8563	731.449	175.954
173	1.72	33.8361	1194.59	536.992	105.999	1202.65	577.588	-38.7606	1197.61	578.991	208.449	1046.57	710.569	-132.589	1036.67	733.896	22.9225	1004.12	614.388	290.995	681.537	632.679	258.546	750.198	355.274	186.005	753.333	380.602	191.116	765.788	278.241	171.032	732.053	177.694	-204.912	672.559	621.741	-159.79	744.46	350.746	-96.1016	760.219	378.358	-98.8566	763.818	275.439	-63.8922	731.448	175.964
174	1.73	33.7955	1194.94	537.191	106.015	1202.92	577.958	-38.7921	1197.82	579.328	208.409	1046.57	710.593	-132.617	1036.65	733.943	22.9091	1004.08	614.493	291.131	681.683	632.453	258.62	750.227	355.176	186.113	753.461	380.499	191.149	765.761	278.211	171.025	732.018	177.673	-204.879	672.63	621.708	-159.815	744.446	350.762	-96.0996	760.189	378.399	-98.8579	763.803	275.431	-63.8982	731.434	175.939
175	1.74	33.8323	1195.26	537.443	106.064	1203.18	578.367	-38.7764	1198.02	579.615	208.381	1046.57	710.592	-132.63	1036.61	733.971	22.9409	1004.05	614.597	291.275	681.79	632.24	258.762	750.241	355.069	186.274	753.657	380.353	191.23	765.792	278.153	171.07	731.984	177.636	-205.142	672.55	621.753	-159.806	744.43	350.731	-96.0846	760.161	378.368	-98.8745	763.806	275.414	-63.8679	731.415	175.914
176	1.75	33.9353	1195.53	537.818	106.143	1203.44	578.783	-38.7289	1198.24	579.918	208.375	1046.58	710.592	-132.609	1036.58	734.021	23.0574	1004.02	614.818	291.457	681.907	632.021	258.947	750.253	354.958	186.486	753.884	380.233	191.389	765.88	278.184	171.192	731.942	177.652	-205.627	672.355	621.898	-159.957	744.684	350.511	-96.0325	760.104	378.365	-99.0213	764.117	275.353	-63.8336	731.39	175.928
177	1.76	34.0854	1195.79	538.331	106.207	1203.7	579.149	-38.6598	1198.49	580.241	208.378	1046.59	710.604	-132.587	1036.57	734.076	23.1676	1004.03	614.92	291.711	682.075	631.81	259.149	750.247	354.794	186.716	754.139	380.122	191.552	766.011	278.202	171.322	731.925	177.672	-205.762	672.372	621.956	-160.36	745.297	350.043	-95.9747	760.055	378.36	-99.3636	764.758	275.205	-63.777	731.371	175.97
178	1.77	34.197	1196.11	538.824	106.22	1203.97	579.471	-38.6062	1198.76	580.476	208.358	1046.59	710.58	-132.583	1036.61	734.103	23.1939	1004.11	614.85	292.039	682.293	631.618	259.359	750.219	354.564	186.967	754.396	380.048	191.72	766.208	278.206	171.453	731.948	177.588	-205.819	672.443	622.013	-160.444	745.468	349.905	-95.9531	760.074	378.344	-99.4518	764.927	275.136	-63.7369	731.381	175.959
179	1.78	34.2408	1196.53	539.161	106.231	1204.26	579.768	-38.5776	1199.05	580.708	208.326	1046.59	710.552	-132.608	1036.64	734.102	23.1693	1004.17	614.815	292.336	682.42	631.304	259.569	750.175	354.356	187.214	754.681	380.025	191.894	766.448	278.154	171.585	732.011	177.41	-205.868	672.488	622.023	-160.281	745.253	350.074	-95.9901	760.115	378.322	-99.3071	764.72	275.136	-63.77	731.408	175.916
180	1.79	34.1949	1196.99	539.31	106.242	1204.53	580.042	-38.5822	1199.33	581.01	208.277	1046.57	710.538	-132.665	1036.68	734.084	23.0676	1004.23	614.745	292.682	682.483	630.835	259.755	750.132	354.149	187.41	755.07	379.924	192.059	766.709	278.061	171.692	732.104	177.176	-205.735	672.554	621.875	-159.894	744.663	350.493	-96.0638	760.172	378.278	-98.9554	764.098	275.213	-63.8282	731.433	175.895
181	1.8	34.1201	1197.45	539.378	106.22	1204.81	580.341	-38.6074	1199.64	581.288	208.224	1046.55	710.558	-132.729	1036.72	734.052	22.9399	1004.29	614.676	293.139	682.566	630.314	259.923	750.117	353.931	187.574	755.566	379.664	192.202	767.09	277.88	171.804	732.215	176.936	-205.382	672.74	621.582	-159.837	744.545	350.574	-96.1295	760.222	378.275	-98.9043	763.939	275.269	-63.8828	731.464	175.873
182	1.81	34.091	1197.87	539.457	106.237	1205.14	580.637	-38.6131	1199.94	581.509	208.193	1046.54	710.567	-132.754	1036.76	734.065	22.8775	1004.34	614.67	293.662	682.742	629.878	260.12	750.168	353.701	187.825	756.099	379.43	192.441	767.583	277.695	171.976	732.324	176.778	-205.332	672.832	621.458	-159.843	744.545	350.598	-96.1663	760.259	378.297	-98.903	763.923	275.267	-63.9243	731.487	175.888
183	1.82	34.1592	1198.27	539.654	106.331	1205.47	581.018	-38.5579	1200.24	581.684	208.185	1046.56	710.559	-132.736	1036.82	734.093	22.8993	1004.39	614.701	294.177	682.956	629.321	260.347	750.272	353.503	188.17	756.631	379.351	192.806	768.154	277.551	172.236	732.502	176.752	-205.535	672.846	621.523	-159.838	744.573	350.59	-96.1615	760.279	378.282	-98.8774	763.95	275.283	-63.8968	731.508	175.865
184	1.83	34.3315	1198.67	539.997	106.459	1205.78	581.376	-38.4287	1200.53	581.874	208.196	1046.57	710.531	-132.704	1036.86	734.108	22.9979	1004.46	614.686	294.737	683.178	628.742	260.622	750.429	353.275	188.58	757.12	379.412	193.255	768.701	277.494	172.6	732.926	176.779	-205.993	672.74	621.702	-159.781	744.591	350.543	-96.1083	760.309	378.221	-98.8443	763.971	275.25	-63.827	731.519	175.842
185	1.84	34.5542	1199.05	540.427	106.571	1206.05	581.726	-38.268	1200.76	582.071	208.198	1046.58	710.502	-132.649	1036.85	734.117	23.1042	1004.47	614.662	295.307	683.417	628.29	260.962	750.629	352.988	188.964	757.595	379.435	193.766	769.281	277.515	173.029	733.621	176.802	-206.146	672.731	621.712	-159.726	744.593	350.534	-96.0286	760.297	378.167	-98.5554	763.796	275.614	-63.7587	731.509	175.832
186	1.85	34.7647	1199.39	540.84	106.671	1206.27	582.091	-38.1352	1201	582.31	208.187	1046.58	710.493	-132.612	1036.81	734.103	23.1676	1004.43	614.738	295.834	683.567	627.71	261.283	750.871	352.716	189.339	758.088	379.404	194.252	769.996	277.454	173.509	734.565	176.886	-206.246	672.75	621.679	-159.698	744.567	350.531	-95.9697	760.245	378.153	-97.9837	763.378	276.58	-63.713	731.462	175.829
187	1.86	34.9008	1199.64	541.222	106.753	1206.45	582.404	-38.0763	1201.25	582.607	208.162	1046.58	710.476	-132.603	1036.79	734.092	23.1846	1004.37	614.844	296.388	683.728	627.131	261.569	751.166	352.475	189.667	758.664	379.122	194.696	770.755	277.334	173.889	735.692	176.924	-206.316	672.765	621.631	-159.894	744.812	350.322	-95.9707	760.18	378.19	-98.2771	763.711	276.36	-63.7109	731.404	175.845
188	1.87	34.9395	1199.89	541.562	106.819	1206.65	582.727	-38.0537	1201.52	582.893	208.13	1046.57	710.455	-132.589	1036.79	734.114	23.1505	1004.31	614.976	296.922	684.013	626.735	261.833	751.557	352.31	189.942	759.365	378.796	195.156	771.564	277.255	174.157	736.928	176.746	-206.182	672.813	621.457	-160.172	745.122	350.075	-96.0285	760.154	378.244	-98.7819	764.24	275.843	-63.7445	731.366	175.861
189	1.88	34.9529	1200.23	541.751	106.866	1206.91	583.012	-38.0528	1201.86	583.101	208.124	1046.57	710.427	-132.579	1036.81	734.102	23.0997	1004.3	615.013	297.373	684.252	626.329	262.048	752.061	352.048	190.216	760.179	378.683	195.665	772.686	277.191	174.462	738.237	176.694	-205.972	672.908	621.252	-159.859	744.65	350.434	-96.0712	760.186	378.209	-98.107	763.408	276.692	-63.7792	731.379	175.82
190	1.89	34.9891	1200.67	541.758	106.902	1207.25	583.187	-38.0146	1202.21	583.288	208.16	1046.59	710.399	-132.561	1036.87	734.094	23.0949	1004.4	614.857	297.835	684.412	625.901	262.209	752.766	351.695	190.548	761.281	378.549	196.136	774.051	277.026	174.758	739.569	176.922	-206.278	672.822	621.406	-159.783	744.583	350.493	-96.075	760.237	378.144	-97.926	763.23	276.851	-63.8096	731.432	175.782
191	1.9	35.0445	1201.22	541.705	106.981	1207.65	583.361	-37.9365	1202.56	583.444	208.213	1046.64	710.369	-132.513	1036.97	734.093	23.1539	1004.55	614.663	298.267	684.561	625.568	262.429	753.701	351.429	190.935	762.667	378.392	196.764	775.843	277.127	174.946	741.221	176.979	-206.33	672.885	621.489	-159.736	744.62	350.477	-96.0647	760.309	378.12	-98.0733	763.414	276.427	-63.8097	731.503	175.762
192	1.91	35.1415	1201.76	541.709	107.07	1208.05	583.53	-37.8251	1202.9	583.521	208.261	1046.7	710.326	-132.443	1037.08	734.07	23.2317	1004.68	614.514	298.623	684.699	625.272	262.418	754.444	351.645	191.201	764.272	378.132	197.621	778.404	277.686	175.119	743.187	176.916	-206.321	673.04	621.624	-159.701	744.685	350.435	-96.0295	760.398	378.074	-98.5694	763.865	275.42	-63.789	731.577	175.745
193	1.92	35.2631	1202.23	541.859	107.145	1208.4	583.69	-37.7091	1203.22	583.642	208.31	1046.74	710.269	-132.366	1037.16	734.065	23.3044	1004.79	614.368	298.97	684.821	624.845	262.023	754.95	352.334	191.521	766.055	378.017	198.316	780.988	278.146	175.215	745.473	177.058	-206.323	673.166	621.717	-159.678	744.719	350.416	-95.992	760.445	378.024	-98.6863	763.987	275.204	-63.7621	731.622	175.754
194	1.93	35.3631	1202.59	542.156	107.25	1208.68	583.904	-37.6095	1203.47	583.876	208.357	1046.74	710.235	-132.288	1037.2	734.052	23.3651	1004.77	614.364	299.345	684.935	624.375	262.068	755.95	352.4	191.926	768.03	378.06	198.94	783.337	278.279	175.198	748.091	177.226	-206.349	673.243	621.765	-159.671	744.7	350.441	-95.9703	760.429	378.056	-98.7132	764.003	275.162	-63.7419	731.596	175.792
195	1.94	35.4484	1202.83	542.662	107.344	1208.88	584.119	-37.5465	1203.71	584.146	208.384	1046.71	710.175	-132.21	1037.22	734.02	23.4261	1004.65	614.534	299.947	684.995	624.095	262.134	757.096	352.327	192.239	770.074	378.199	199.513	785.78	278.442	175.157	750.953	177.493	-206.424	673.265	621.756	-159.682	744.635	350.471	-95.9809	760.328	378.127	-98.4759	763.767	275.584	-63.7496	731.523	175.8
196	1.95	35.4996	1203.13	543.049	107.415	1209.07	584.331	-37.5234	1203.93	584.369	208.396	1046.68	710.123	-132.152	1037.22	733.99	23.4739	1004.54	614.731	300.786	684.957	624.057	262.165	758.186	352.44	192.603	772.299	378.468	199.988	788.428	278.646	174.848	754.07	177.969	-206.494	673.207	621.606	-159.702	744.564	350.493	-96.0193	760.231	378.174	-97.9838	763.289	276.566	-63.7845	731.44	175.803
197	1.96	35.5502	1203.52	543.334	107.493	1209.29	584.552	-37.491	1204.2	584.586	208.417	1046.67	710.1	-132.094	1037.23	733.964	23.5189	1004.43	614.876	301.322	685.036	623.819	262.033	759.356	352.554	192.938	774.776	378.96	200.389	791.114	278.985	174.19	757.594	178.478	-206.549	673.19	621.524	-159.719	744.517	350.509	-96.0344	760.172	378.242	-97.8868	763.126	276.861	-63.8009	731.363	175.837
198	1.97	35.5963	1203.96	543.421	107.589	1209.57	584.729	-37.4219	1204.53	584.764	208.457	1046.7	710.118	-132.007	1037.29	733.949	23.595	1004.42	614.946	301.804	685.203	623.517	261.791	760.673	352.717	193.251	777.18	379.267	200.587	793.635	279.223	173.988	761.179	179.468	-206.564	673.265	621.543	-159.714	744.528	350.544	-96.0338	760.148	378.294	-98.0877	763.299	276.526	-63.7912	731.346	175.86
199	1.98	35.6534	1204.43	543.351	107.713	1209.89	584.823	-37.3067	1204.91	584.856	208.533	1046.75	710.126	-131.907	1037.38	733.899	23.7075	1004.53	614.835	302.296	685.448	623.231	261.477	762.184	352.88	193.435	779.735	379.339	200.682	796.412	279.305	173.763	764.937	180.773	-206.547	673.412	621.631	-159.67	744.582	350.537	-96.0031	760.205	378.251	-98.327	763.587	275.945	-63.7611	731.392	175.844
200	1.99	35.7356	1204.92	543.143	107.838	1210.21	584.873	-37.1804	1205.32	584.881	208.63	1046.81	710.129	-131.794	1037.49	733.837	23.8176	1004.65	614.635	302.829	685.708	622.895	261.07	763.928	353.279	193.526	783.758	380.479	201.101	800.611	280.462	170.69	769.469	181.115	-206.509	673.581	621.717	-159.623	744.656	350.478	-95.9278	760.3	378.147	-97.8525	763.317	276.612	-63.7367	731.468	175.806
201	2	35.8234	1205.44	543.013	107.963	1210.54	584.957	-37.0608	1205.72	584.955	208.713	1046.87	710.172	-131.691	1037.6	733.775	23.9095	1004.76	614.472	303.31	685.976	622.505	260.504	765.898	353.696	193.612	787.328	381.362	200.839	804.424	281.497	168.63	774.012	181.904	-206.483	673.758	621.824	-159.585	744.731	350.445	-95.8666	760.393	378.066	-97.9396	763.479	276.308	-63.71	731.542	175.802
202	2.01	35.9003	1205.93	543.13	108.055	1210.84	585.026	-36.9652	1206.11	585.072	208.772	1046.91	710.244	-131.601	1037.7	733.752	23.979	1004.83	614.404	303.771	686.172	621.981	259.731	768.112	354.122	193.507	790.767	382.311	200.331	808.335	282.479	166.794	778.708	182.905	-206.479	673.855	621.858	-159.575	744.77	350.437	-95.8567	760.446	378.042	-98.2021	763.716	275.862	-63.6996	731.566	175.805
203	2.02	35.9868	1206.34	543.438	108.132	1211.07	585.091	-36.891	1206.41	585.225	208.789	1046.91	710.295	-131.533	1037.77	733.711	24.0391	1004.82	614.434	304.254	686.346	621.361	258.804	770.476	354.49	193.259	794.263	383.397	199.793	812.188	283.466	164.858	783.566	184.077	-206.524	673.92	621.871	-159.608	744.764	350.426	-95.8921	760.432	378.08	-98.044	763.559	276.183	-63.72	731.543	175.803
204	2.03	36.0866	1206.64	543.829	108.238	1211.23	585.224	-36.8165	1206.65	585.439	208.785	1046.89	710.344	-131.473	1037.8	733.655	24.0912	1004.78	614.533	304.717	686.489	620.637	257.871	772.82	354.246	193.038	797.935	384.485	199.059	816.172	284.629	162.708	788.667	185.388	-206.599	673.937	621.819	-159.63	744.738	350.434	-95.9137	760.393	378.085	-98.2636	763.647	275.817	-63.7487	731.503	175.804
205	2.04	36.1801	1206.89	544.092	108.356	1211.37	585.396	-36.739	1206.88	585.638	208.797	1046.86	710.421	-131.421	1037.84	733.632	24.1473	1004.74	614.656	305.148	686.685	619.906	257.084	775.075	353.409	192.826	801.768	385.626	198.22	820.147	285.532	160.323	794.096	186.924	-206.68	673.925	621.72	-159.65	744.695	350.444	-95.9317	760.334	378.116	-97.868	763.272	276.621	-63.7737	731.456	175.814
206	2.05	36.2666	1207.14	544.289	108.468	1211.54	585.505	-36.6726	1207.13	585.819	208.82	1046.84	710.488	-131.353	1037.87	733.596	24.1965	1004.73	614.716	305.586	686.862	619.101	256.032	777.714	353.544	192.623	805.736	386.945	197.377	824.492	286.644	157.779	799.948	188.394	-206.745	673.934	621.666	-159.648	744.664	350.443	-95.9241	760.289	378.126	-97.7725	763.147	276.836	-63.7675	731.414	175.805
207	2.06	36.3846	1207.45	544.413	108.569	1211.73	585.555	-36.5691	1207.42	585.943	208.85	1046.83	710.544	-131.27	1037.91	733.559	24.2573	1004.71	614.73	306.061	687.057	618.263	254.834	780.555	353.914	192.492	810.059	388.23	196.614	828.978	288.039	155.231	806.075	189.949	-206.769	673.979	621.645	-159.64	744.667	350.449	-95.9045	760.285	378.116	-97.7393	763.108	276.878	-63.746	731.408	175.785
208	2.07	36.4819	1207.89	544.377	108.687	1211.95	585.593	-36.451	1207.75	586.018	208.885	1046.86	710.614	-131.184	1037.98	733.536	24.3188	1004.75	614.71	306.481	687.293	617.469	253.608	783.485	354.349	192.51	814.496	389.694	195.86	833.626	289.669	152.506	812.119	192.032	-206.77	674.108	621.736	-159.618	744.709	350.444	-95.884	760.298	378.134	-97.7188	763.142	276.882	-63.73	731.44	175.793
209	2.08	36.5619	1208.4	544.275	108.798	1212.22	585.595	-36.3174	1208.1	586.067	208.92	1046.91	710.657	-131.11	1038.06	733.512	24.377	1004.83	614.635	306.911	687.559	616.566	252.334	786.524	354.915	192.618	819.083	391.275	195.023	838.486	291.19	149.501	818.301	194.248	-206.739	674.258	621.823	-159.584	744.755	350.422	-95.8457	760.355	378.103	-97.6744	763.205	276.835	-63.7147	731.474	175.788
210	2.09	36.6298	1208.91	544.14	108.863	1212.53	585.599	-36.1811	1208.46	586.133	208.959	1046.95	710.689	-131.031	1038.14	733.485	24.4305	1004.88	614.577	307.385	687.87	615.643	250.988	789.576	355.551	192.796	823.805	392.869	194.174	843.403	292.681	146.396	824.686	196.613	-206.711	674.414	621.916	-159.539	744.788	350.384	-95.7938	760.392	378.012	-97.8695	763.434	276.386	-63.6922	731.502	175.758
211	2.1	36.6606	1209.35	544.073	108.939	1212.81	585.634	-36.0881	1208.82	586.26	208.953	1046.99	710.721	-130.969	1038.22	733.442	24.4537	1004.91	614.525	307.87	688.265	614.734	249.523	792.724	356.247	193.025	828.562	394.707	193.24	848.406	294.387	143.237	831.318	199.202	-206.721	674.508	621.956	-159.517	744.807	350.363	-95.7769	760.41	377.967	-98.1508	763.659	275.845	-63.6993	731.513	175.737
212	2.11	36.6466	1209.78	544.038	108.977	1213.04	585.673	-36.0638	1209.19	586.407	208.907	1047.02	710.775	-130.941	1038.29	733.426	24.4526	1004.93	614.538	308.331	688.696	613.802	247.879	796.027	357.028	193.218	833.338	396.467	192.241	853.507	296.309	139.912	837.945	202.031	-206.748	674.524	621.93	-159.549	744.822	350.379	-95.8142	760.413	378	-97.7701	763.351	276.533	-63.736	731.513	175.749
213	2.12	36.5838	1210.24	544.035	108.988	1213.27	585.725	-36.0787	1209.58	586.541	208.859	1047.06	710.826	-130.93	1038.35	733.397	24.4283	1004.95	614.48	308.806	689.171	612.856	246.18	799.338	357.889	193.334	838.143	398.41	191.171	858.64	298.33	136.409	844.497	205.099	-206.784	674.531	621.911	-159.591	744.82	350.368	-95.8703	760.412	378.054	-97.6958	763.237	276.748	-63.784	731.505	175.783
214	2.13	36.523	1210.74	544.108	109.015	1213.51	585.744	-36.0912	1209.94	586.644	208.835	1047.11	710.888	-130.912	1038.41	733.36	24.4268	1004.97	614.412	309.353	689.663	611.811	244.46	802.816	358.771	193.514	842.912	400.344	190.031	863.858	300.374	133.141	851.622	208.072	-206.823	674.563	621.899	-159.626	744.817	350.384	-95.904	760.407	378.068	-97.6977	763.183	276.834	-63.8016	731.492	175.773
215	2.14	36.5194	1211.19	544.276	109.051	1213.75	585.775	-36.0805	1210.28	586.738	208.801	1047.15	710.932	-130.869	1038.46	733.335	24.4767	1005.01	614.376	309.861	690.164	610.69	242.682	806.449	359.744	193.626	847.702	402.345	188.73	869.243	302.294	129.964	858.89	211.304	-206.858	674.586	621.906	-159.634	744.796	350.408	-95.9112	760.39	378.08	-97.6992	763.17	276.861	-63.7871	731.48	175.799
216	2.15	36.5522	1211.6	544.458	109.099	1213.98	585.803	-36.0403	1210.63	586.816	208.791	1047.2	710.995	-130.802	1038.52	733.299	24.574	1005.03	614.372	310.393	690.662	609.456	240.948	810.205	360.936	193.667	852.542	404.626	187.217	874.701	304.083	126.613	865.756	214.831	-206.877	674.647	621.937	-159.6	744.773	350.416	-95.865	760.36	378.082	-97.6888	763.154	276.874	-63.7471	731.46	175.804
217	2.16	36.5641	1211.99	544.645	109.155	1214.21	585.796	-35.9894	1210.98	586.886	208.788	1047.26	711.081	-130.725	1038.58	733.231	24.6823	1005.04	614.35	310.93	691.192	608.187	239.183	814.149	362.089	193.835	857.27	407.11	185.246	879.921	306.618	123.262	872.864	218.301	-206.85	674.719	621.947	-159.552	744.76	350.418	-95.8038	760.35	378.064	-97.6593	763.14	276.867	-63.709	731.435	175.813
218	2.17	36.5344	1212.41	544.786	109.163	1214.46	585.759	-36.0007	1211.34	587.043	208.679	1047.39	711.17	-130.655	1038.64	733.196	24.7584	1005.06	614.338	311.419	691.755	606.913	237.406	818.111	363.37	193.939	861.945	409.545	182.515	885.118	309.402	119.928	879.912	222.027	-206.843	674.797	621.991	-159.532	744.775	350.428	-95.775	760.351	378.091	-97.6345	763.172	276.886	-63.678	731.416	175.827
219	2.18	36.4547	1212.87	544.864	109.13	1214.75	585.761	-36.0718	1211.71	587.225	208.557	1047.55	711.279	-130.629	1038.7	733.208	24.7971	1005.1	614.314	311.849	692.433	605.608	235.578	822.178	364.649	193.835	866.709	412.019	180.61	890.367	312.162	116.652	887.22	225.493	-206.885	674.89	622.055	-159.528	744.797	350.456	-95.7675	760.357	378.12	-97.6296	763.214	276.892	-63.6622	731.418	175.848
220	2.19	36.3524	1213.34	544.894	109.056	1215.03	585.682	-36.1603	1212.05	587.307	208.597	1047.59	711.4	-130.616	1038.76	733.179	24.8125	1005.16	614.277	312.296	693.154	604.241	233.721	826.271	365.895	193.658	871.155	414.418	178.871	895.662	314.87	113.348	894.754	228.833	-206.912	674.934	622.022	-159.531	744.819	350.411	-95.7753	760.381	378.065	-97.6106	763.244	276.848	-63.6697	731.441	175.842
221	2.2	36.2097	1213.83	544.851	108.935	1215.34	585.493	-36.2793	1212.34	587.369	208.523	1047.69	711.462	-130.618	1038.82	733.112	24.8091	1005.19	614.202	312.724	693.89	602.81	231.822	830.385	367.141	193.485	875.154	416.528	177.194	900.984	317.571	110.013	902.024	232.806	-206.965	674.979	621.982	-159.537	744.839	350.338	-95.7819	760.41	377.987	-97.5945	763.249	276.779	-63.6942	731.474	175.772
222	2.21	36.041	1214.3	544.826	108.792	1215.67	585.351	-36.4061	1212.68	587.398	208.416	1047.8	711.539	-130.656	1038.85	733.072	24.7692	1005.22	614.133	313.218	694.638	601.337	229.91	834.484	368.504	193.319	879.381	418.86	175.581	906.282	320.263	106.624	909.163	237.06	-207.04	674.994	621.902	-159.555	744.844	350.325	-95.804	760.433	377.986	-97.5934	763.229	276.771	-63.7138	731.495	175.751
223	2.22	35.8634	1214.73	544.759	108.654	1215.95	585.275	-36.5326	1213.07	587.483	208.278	1047.95	711.629	-130.68	1038.89	733.037	24.7151	1005.27	614.052	313.709	695.456	599.945	227.979	838.533	369.843	193.13	883.662	421.264	174.031	911.497	322.986	103.269	916.254	241.412	-207.113	675.018	621.87	-159.581	744.851	350.313	-95.8466	760.443	377.989	-97.6059	763.219	276.786	-63.7338	731.503	175.739
224	2.23	35.6972	1215.19	544.639	108.549	1216.23	585.191	-36.6481	1213.45	587.631	208.13	1048.08	711.722	-130.704	1038.93	733.005	24.6715	1005.33	614.06	314.19	696.298	598.552	226.005	842.512	371.191	193.167	887.786	423.685	172.524	916.633	325.819	99.9007	923.332	245.966	-207.163	675.082	621.907	-159.606	744.862	350.295	-95.8946	760.446	377.983	-97.6286	763.209	276.787	-63.7618	731.504	175.724
225	2.24	35.5666	1215.69	544.623	108.483	1216.5	585.172	-36.7234	1213.79	587.856	208.014	1048.2	711.84	-130.714	1038.97	733.001	24.6914	1005.37	614.055	314.663	697.113	597.169	224.093	846.384	372.679	193.407	891.929	425.943	170.985	921.738	328.838	96.6886	930.544	250.707	-207.179	675.103	621.912	-159.606	744.859	350.331	-95.8917	760.446	378.002	-97.6446	763.198	276.807	-63.7629	731.505	175.773
226	2.25	35.4267	1216.16	544.663	108.439	1216.74	585.194	-36.7991	1214.1	588.095	207.925	1048.3	711.928	-130.697	1039.01	732.98	24.7481	1005.4	614.026	315.159	697.915	595.641	222.022	850.122	374.316	193.727	896.068	428.194	169.498	926.842	331.931	93.5973	937.818	255.461	-207.193	675.148	621.978	-159.58	744.851	350.357	-95.8499	760.446	378.025	-97.6218	763.194	276.849	-63.7348	731.493	175.779
227	2.26	35.2606	1216.61	544.744	108.389	1216.97	585.259	-36.906	1214.38	588.264	207.837	1048.4	711.981	-130.68	1039.03	732.9	24.8197	1005.41	614.057	315.539	698.743	594.054	219.655	853.684	376.248	194.044	900.095	430.569	168.091	931.793	334.946	90.4086	944.674	260.614	-207.197	675.135	621.934	-159.552	744.836	350.323	-95.8089	760.412	377.994	-97.5915	763.179	276.832	-63.7035	731.469	175.783
228	2.27	35.0337	1216.96	544.869	108.26	1217.19	585.333	-37.0502	1214.62	588.433	207.728	1048.5	712.047	-130.703	1039.04	732.834	24.8263	1005.4	614.06	315.83	699.596	592.563	217.531	857.327	378.005	194.255	904.118	433.131	166.733	936.657	337.986	87.4687	951.772	265.716	-207.218	675.1	621.886	-159.55	744.803	350.305	-95.8132	760.377	378	-97.5959	763.165	276.816	-63.6982	731.446	175.793
229	2.28	34.713	1217.23	545.109	108.045	1217.42	585.373	-37.4201	1214.87	588.559	207.578	1048.6	712.135	-130.758	1039.07	732.808	24.7616	1005.35	614.151	316.054	700.431	591.001	215.444	861.087	379.677	194.417	908.093	435.603	165.478	941.597	341.229	84.6739	958.988	270.74	-207.25	675.074	621.856	-159.566	744.778	350.36	-95.8536	760.365	378.05	-97.6292	763.17	276.86	-63.7177	731.43	175.813
230	2.29	34.38	1217.54	545.269	107.794	1217.67	585.369	-37.9995	1215.13	588.621	207.415	1048.72	712.244	-130.818	1039.08	732.751	24.7091	1005.3	614.219	316.268	701.227	589.253	213.434	864.771	381.402	194.6	911.87	437.921	164.192	946.3	344.434	82.044	965.837	276.219	-207.26	675.055	621.793	-159.585	744.778	350.387	-95.8911	760.344	378.068	-97.6592	763.177	276.874	-63.7369	731.407	175.809
231	2.3	34.0799	1217.94	545.256	107.524	1217.98	585.213	-38.2599	1215.42	588.689	207.261	1048.87	712.35	-130.841	1039.13	732.699	24.6991	1005.33	614.194	316.421	702.139	587.734	211.475	868.57	383.029	194.811	915.63	440.067	163.083	951.108	347.492	79.6494	972.934	281.284	-207.25	675.103	621.795	-159.587	744.79	350.348	-95.899	760.365	378.052	-97.6532	763.198	276.831	-63.7501	731.412	175.816
232	2.31	33.7965	1218.44	545.116	107.265	1218.34	584.954	-38.4555	1215.71	588.721	207.115	1049.05	712.444	-130.857	1039.18	732.665	24.7355	1005.45	614.085	316.46	703.151	586.209	209.664	872.369	384.704	194.976	919.368	442.217	162.049	955.954	350.616	77.6309	980.104	286.322	-207.279	675.209	621.896	-159.569	744.833	350.313	-95.8749	760.428	378.022	-97.6048	763.225	276.779	-63.7455	731.467	175.83
233	2.32	33.5331	1219	544.961	107.078	1218.65	584.729	-38.6535	1216.01	588.818	206.979	1049.23	712.579	-130.862	1039.23	732.587	24.7861	1005.62	613.852	316.45	704.083	584.537	207.93	876.233	386.316	195.161	923.131	444.351	160.888	960.826	354.036	75.7273	987.077	291.218	-207.299	675.289	621.964	-159.551	744.874	350.296	-95.8238	760.482	377.953	-97.5617	763.26	276.736	-63.7597	731.517	175.903
234	2.33	33.2498	1219.47	544.893	106.915	1218.91	584.601	-38.9015	1216.29	588.949	206.825	1049.41	712.766	-130.87	1039.29	732.532	24.8122	1005.77	613.666	316.358	704.955	582.873	206.271	880.086	388.083	195.493	926.804	446.433	159.488	965.801	357.824	74.0685	993.783	296.2	-207.298	675.334	621.98	-159.532	744.894	350.281	-95.7862	760.512	377.911	-97.5352	763.262	276.733	-63.8113	731.532	176.06
235	2.34	32.9479	1219.8	544.959	106.697	1219.13	584.547	-39.21	1216.53	589.154	206.647	1049.56	713.018	-130.892	1039.32	732.538	24.8145	1005.85	613.705	316.183	705.911	581.311	204.651	883.873	389.888	195.902	930.416	448.38	158.461	970.572	361.181	72.6104	1000.22	301.362	-207.34	675.328	621.97	-159.55	744.892	350.303	-95.8233	760.522	377.957	-97.5511	763.253	276.762	-63.9276	731.471	176.352
236	2.35	32.5689	1220.07	545.128	106.415	1219.34	584.478	-39.5105	1216.72	589.378	206.452	1049.66	713.253	-130.943	1039.32	732.494	24.7724	1005.83	613.866	315.956	706.826	579.641	203.125	887.573	391.726	196.434	934.062	450.192	157.619	975.191	364.408	71.1508	1006.49	306.259	-207.413	675.295	621.956	-159.6	744.854	350.334	-95.8891	760.482	378.041	-97.601	763.205	276.822	-63.9542	731.401	176.4
237	2.36	32.1739	1220.3	545.266	106.129	1219.53	584.389	-39.7728	1216.85	589.6	206.298	1049.73	713.44	-130.966	1039.3	732.44	24.7372	1005.73	614.058	315.718	707.609	577.78	201.633	891.173	393.529	196.685	937.25	452.426	156.862	979.606	367.633	69.786	1012.55	311.214	-207.464	675.212	621.841	-159.624	744.787	350.36	-95.9339	760.418	378.08	-97.6401	763.144	276.879	-63.7793	731.346	176.018
238	2.37	31.839	1220.47	545.499	105.852	1219.71	584.275	-39.9838	1216.95	589.749	206.163	1049.79	713.568	-130.986	1039.3	732.375	24.7248	1005.63	614.278	315.43	708.398	575.985	200.218	894.761	395.253	196.885	940.299	454.837	156.113	983.908	370.82	68.5801	1018.47	316.175	-207.522	675.174	621.774	-159.632	744.722	350.381	-95.936	760.336	378.081	-97.6718	763.111	276.889	-63.7316	731.273	175.951
239	2.38	31.5298	1220.68	545.696	105.582	1219.89	584.172	-40.1496	1217.07	589.871	206.03	1049.88	713.683	-131.027	1039.34	732.327	24.7236	1005.63	614.377	315.221	709.071	574.019	198.886	898.279	396.946	197.046	943.244	457.237	155.398	988.062	374.065	67.39	1024.23	321.056	-207.57	675.187	621.725	-159.628	744.696	350.377	-95.9254	760.285	378.089	-97.6727	763.1	276.87	-63.7005	731.225	175.913
240	2.39	31.2547	1220.98	545.748	105.358	1220.11	584.044	-40.31	1217.23	589.954	205.892	1050.02	713.791	-131.067	1039.41	732.295	24.7288	1005.71	614.348	315.134	709.492	571.679	197.609	901.747	398.59	197.204	946.116	459.392	154.718	992.183	377.145	66.3631	1029.83	326.029	-207.596	675.277	621.772	-159.616	744.713	350.368	-95.9148	760.289	378.114	-97.6423	763.128	276.882	-63.6865	731.23	175.899
241	2.4	30.9949	1221.38	545.68	105.163	1220.38	583.911	-40.4735	1217.46	589.989	205.724	1050.22	713.885	-131.099	1039.5	732.252	24.7257	1005.87	614.214	314.802	710.215	569.712	196.383	905.159	400.175	197.379	949.007	461.551	154.037	996.27	380.063	65.3645	1035.3	330.807	-207.638	675.416	621.847	-159.595	744.769	350.34	-95.9098	760.366	378.067	-97.6008	763.196	276.823	-63.6621	731.299	175.853
242	2.41	30.7603	1221.83	545.534	104.958	1220.66	583.751	-40.6612	1217.71	590.071	205.536	1050.46	713.994	-131.131	1039.6	732.175	24.6987	1006.07	613.974	314.418	711.155	568.047	195.141	908.629	401.705	197.56	951.83	463.621	153.401	1000.22	383.031	64.3495	1040.49	335.596	-207.675	675.536	621.882	-159.58	744.831	350.301	-95.8985	760.457	377.977	-97.5971	763.256	276.775	-63.647	731.409	175.793
243	2.42	30.5285	1222.24	545.36	104.733	1220.9	583.555	-40.8439	1217.95	590.157	205.346	1050.7	714.114	-131.171	1039.67	732.125	24.6653	1006.22	613.768	314.003	712.128	566.447	193.927	911.936	403.121	197.763	954.531	465.508	152.736	1004.01	386.072	63.4403	1045.48	340.343	-207.725	675.617	621.892	-159.582	744.869	350.268	-95.8975	760.519	377.922	-97.5924	763.286	276.738	-63.642	731.476	175.757
244	2.43	30.2961	1222.6	545.252	104.534	1221.12	583.452	-41.0397	1218.16	590.221	205.158	1050.91	714.216	-131.223	1039.72	732.071	24.6039	1006.33	613.657	313.583	713.059	564.826	192.703	915.057	404.718	197.972	957.174	467.356	152.092	1007.62	389.021	62.5111	1050.19	345.067	-207.771	675.636	621.884	-159.601	744.885	350.235	-95.9047	760.525	377.913	-97.5805	763.256	276.74	-63.6448	731.495	175.752
245	2.44	30.0223	1222.86	545.255	104.329	1221.31	583.416	-41.27	1218.36	590.359	204.962	1051.07	714.325	-131.283	1039.76	731.999	24.5241	1006.4	613.62	313.166	713.959	563.195	191.521	918.039	406.442	198.123	959.773	469.134	151.459	1011.1	391.846	61.5271	1054.65	349.724	-207.85	675.554	621.801	-159.655	744.891	350.23	-95.9604	760.51	377.969	-97.6031	763.199	276.811	-63.6805	731.47	175.8
246	2.45	29.7218	1223.05	545.398	104.132	1221.49	583.432	-41.5043	1218.53	590.51	204.758	1051.21	714.457	-131.348	1039.76	731.946	24.3841	1006.47	613.726	312.767	714.82	561.644	190.287	920.908	407.993	198.247	962.199	470.856	150.816	1014.4	394.677	60.1896	1059.06	354.532	-207.944	675.451	621.703	-159.701	744.849	350.256	-96.0469	760.469	378.027	-97.6555	763.136	276.86	-63.7282	731.399	175.879
247	2.46	29.4686	1223.18	545.7	103.975	1221.63	583.482	-41.7065	1218.65	590.659	204.572	1051.35	714.606	-131.394	1039.75	731.92	24.211	1006.6	613.853	312.386	715.455	559.887	189.066	923.687	409.51	198.384	964.44	472.742	150.203	1017.47	397.55	58.7483	1063.54	358.938	-208.01	675.394	621.61	-159.721	744.778	350.304	-96.0687	760.422	378.079	-97.6924	763.098	276.895	-63.7573	731.33	175.909
248	2.47	29.2718	1223.34	545.862	103.86	1221.76	583.504	-41.8375	1218.74	590.791	204.422	1051.48	714.732	-131.409	1039.73	731.86	24.2293	1006.58	614.014	311.94	715.825	557.654	187.937	926.368	410.961	198.455	966.633	474.528	149.622	1020.44	400.242	57.9198	1067.3	363.274	-208.049	675.423	621.603	-159.707	744.737	350.307	-96.0598	760.375	378.044	-97.6826	763.095	276.9	-63.7299	731.277	175.884
249	2.48	29.1043	1223.55	545.929	103.759	1221.91	583.447	-41.9373	1218.85	590.848	204.288	1051.62	714.867	-131.416	1039.75	731.765	24.3506	1006.59	614.245	311.49	716.556	555.971	186.852	928.896	412.473	198.491	968.702	476.081	148.993	1023.35	402.767	57.4554	1070.85	367.575	-208.073	675.495	621.63	-159.668	744.715	350.265	-96.0371	760.336	378.01	-97.6689	763.135	276.807	-63.6723	731.228	175.874
250	2.49	28.9704	1223.85	545.952	103.657	1222.13	583.419	-42.0465	1219	590.829	204.152	1051.77	715.028	-131.425	1039.8	731.697	24.6519	1006.75	614.975	311.074	717.395	554.529	185.741	931.339	413.971	198.545	970.736	477.611	148.366	1026.17	405.297	57.079	1074.36	371.842	-208.089	675.572	621.646	-159.629	744.729	350.228	-96.0043	760.354	377.985	-97.6463	763.209	276.762	-63.6256	731.242	175.896
251	2.5	28.8163	1224.22	545.86	103.519	1222.4	583.361	-42.1504	1219.17	590.831	204.01	1051.94	715.134	-131.451	1039.86	731.643	24.8397	1006.87	615.248	310.692	718.368	553.234	184.654	933.762	415.32	198.602	972.651	479.114	147.701	1028.91	407.769	56.546	1077.87	375.999	-208.094	675.684	621.74	-159.612	744.788	350.205	-95.9867	760.449	377.944	-97.6117	763.292	276.722	-63.5838	731.337	175.825
252	2.51	28.6551	1224.58	545.734	103.337	1222.68	583.22	-42.2669	1219.34	590.834	203.844	1052.09	715.202	-131.485	1039.93	731.57	24.648	1006.65	614.377	310.29	719.335	551.931	183.544	936.116	416.439	198.584	974.563	480.444	147.031	1031.58	410.107	55.835	1081.25	379.976	-208.129	675.742	621.797	-159.625	744.841	350.196	-95.9816	760.523	377.913	-97.5778	763.309	276.719	-63.5756	731.43	175.743
253	2.52	28.4469	1224.93	545.563	103.114	1222.92	583.094	-42.4059	1219.47	590.847	203.644	1052.24	715.284	-131.553	1039.98	731.497	24.6964	1006.46	614.533	309.803	720.255	550.55	182.419	938.354	417.511	198.569	976.403	481.707	146.294	1034.05	412.359	55.0133	1084.44	383.974	-208.199	675.725	621.77	-159.673	744.861	350.181	-96.0195	760.525	377.914	-97.5909	763.258	276.758	-63.6335	731.468	175.72
254	2.53	28.2363	1225.18	545.537	102.898	1223.09	583.031	-42.5611	1219.59	590.933	203.417	1052.38	715.43	-131.635	1040.01	731.436	24.7112	1006.28	614.83	309.31	721.166	549.295	181.26	940.406	418.724	198.532	978.102	482.946	145.556	1036.37	414.651	54.2308	1087.45	387.815	-208.27	675.625	621.628	-159.732	744.861	350.191	-96.0738	760.508	377.956	-97.6449	763.191	276.778	-63.7004	731.44	175.768
255	2.54	28.0224	1225.37	545.615	102.709	1223.24	583.064	-42.7124	1219.68	591.048	203.202	1052.49	715.618	-131.706	1040.02	731.399	24.6387	1006.17	615	308.874	722.023	548.141	180.128	942.4	420.042	198.45	979.747	484.195	144.804	1038.54	416.869	53.4228	1090.27	391.685	-208.322	675.496	621.49	-159.781	744.835	350.221	-96.1477	760.465	377.979	-97.6945	763.108	276.865	-63.7675	731.385	175.819
256	2.55	27.8431	1225.53	545.758	102.573	1223.41	583.115	-42.8542	1219.77	591.241	203.025	1052.6	715.817	-131.742	1040.01	731.376	24.4844	1006.21	614.876	308.456	722.805	546.971	179.062	944.414	421.242	198.355	981.195	485.464	144.097	1040.6	419.091	52.6337	1092.91	395.515	-208.376	675.414	621.434	-159.798	744.775	350.253	-96.2045	760.423	378.03	-97.7396	763.06	276.947	-63.8283	731.328	175.872
257	2.56	27.7041	1225.74	545.983	102.482	1223.64	583.184	-42.9684	1219.87	591.436	202.905	1052.7	715.949	-131.721	1039.98	731.357	24.3664	1006.38	614.598	307.989	723.498	545.808	178.129	946.311	422.399	198.266	982.639	486.757	143.479	1042.55	421.382	52.0125	1095.43	399.234	-208.389	675.45	621.477	-159.786	744.734	350.28	-96.2189	760.391	378.115	-97.757	763.089	276.936	-63.8168	731.291	175.942
258	2.57	27.6445	1225.98	546.13	102.429	1223.89	583.269	-43.0056	1219.98	591.586	202.828	1052.81	716.031	-131.655	1039.98	731.29	24.3921	1006.64	614.326	307.596	724.193	544.628	177.256	948.076	423.636	198.185	983.979	487.971	142.888	1044.47	423.568	51.412	1097.85	402.882	-208.365	675.549	621.534	-159.721	744.716	350.303	-96.1522	760.357	378.111	-97.7327	763.147	276.881	-63.7317	731.259	175.946
259	2.58	27.6137	1226.25	546.169	102.396	1224.13	583.346	-43.0251	1220.12	591.654	202.748	1052.95	716.092	-131.6	1040	731.256	24.484	1006.83	614.144	307.231	724.907	543.514	176.406	949.748	424.913	198.123	985.265	489.208	142.282	1046.34	425.828	50.9095	1100.21	406.464	-208.379	675.67	621.607	-159.655	744.725	350.239	-96.0547	760.374	378.033	-97.6718	763.209	276.782	-63.6226	731.261	175.895
260	2.59	27.5188	1226.56	546.17	102.347	1224.36	583.365	-43.0831	1220.27	591.707	202.654	1053.11	716.166	-131.571	1040.05	731.192	24.552	1006.9	614.205	306.808	725.635	542.572	175.508	951.48	426.062	198.04	986.71	490.099	141.614	1048.17	428.057	50.3631	1102.53	410.205	-208.4	675.762	621.685	-159.623	744.753	350.191	-95.9988	760.427	377.949	-97.6038	763.243	276.737	-63.5528	731.3	175.848
261	2.6	27.3375	1226.88	546.284	102.247	1224.61	583.393	-43.1975	1220.43	591.839	202.532	1053.28	716.252	-131.581	1040.12	731.168	24.4565	1007.01	614.102	306.337	726.424	541.502	174.401	953.001	427.772	197.898	988.398	490.568	140.947	1049.95	430.286	49.7116	1104.88	413.967	-208.449	675.793	621.699	-159.646	744.78	350.2	-96.0207	760.456	377.962	-97.6036	763.238	276.794	-63.586	731.333	175.855
262	2.61	27.0894	1227.24	546.275	102.075	1224.87	583.373	-43.3505	1220.6	592.002	202.394	1053.42	716.332	-131.627	1040.18	731.145	24.4072	1007.01	614.178	305.824	727.074	540.422	173.113	954.126	430.469	197.783	989.688	491.67	140.22	1051.64	432.449	49.12	1107.17	417.596	-208.515	675.759	621.683	-159.705	744.797	350.206	-96.1019	760.476	378.017	-97.639	763.209	276.846	-63.6611	731.37	175.855
263	2.62	26.8036	1227.61	546.104	101.859	1225.11	583.247	-43.528	1220.77	592.12	202.239	1053.51	716.349	-131.674	1040.23	731.057	24.4222	1006.88	614.412	305.21	727.598	539.312	172.038	955.585	432.001	197.627	990.901	492.838	139.503	1053.31	434.618	48.486	1109.29	421.477	-208.564	675.697	621.616	-159.768	744.798	350.183	-96.1831	760.477	377.999	-97.6783	763.148	276.863	-63.7272	731.391	175.848
264	2.63	26.5776	1227.89	546.1	101.725	1225.3	583.16	-43.6707	1220.93	592.239	202.111	1053.59	716.392	-131.892	1040.09	730.312	24.4988	1006.77	614.709	304.721	728.246	538.271	171.006	957.176	433.447	197.565	992.015	494.029	138.802	1055.02	436.846	47.8273	1111.25	425.236	-208.6	675.629	621.461	-159.812	744.785	350.181	-96.226	760.481	377.981	-97.72	763.109	276.871	-63.7741	731.389	175.861
265	2.64	26.4374	1228.08	546.214	101.657	1225.5	583.164	-43.7508	1221.06	592.417	202.038	1053.65	716.477	-132.321	1039.64	728.719	24.523	1006.85	614.654	304.219	728.901	537.245	170.094	958.71	434.794	197.498	993.112	495.339	138.227	1056.7	439.227	47.1256	1113.13	428.562	-208.619	675.633	621.453	-159.825	744.776	350.197	-96.2304	760.457	378.012	-97.7367	763.086	276.871	-63.7856	731.364	175.866
266	2.65	26.3491	1228.25	546.275	101.637	1225.68	583.202	-43.7983	1221.13	592.581	201.973	1053.71	716.584	-132.391	1039.44	728.138	24.4087	1007.11	614.124	303.713	729.512	536.159	169.301	960.151	436.189	197.51	994.224	496.557	137.654	1058.3	441.586	46.6287	1115.06	432.271	-208.608	675.712	621.523	-159.792	744.764	350.209	-96.2145	760.433	377.989	-97.7236	763.107	276.843	-63.7536	731.329	175.872
267	2.66	26.2869	1228.44	546.38	101.608	1225.86	583.234	-43.8145	1221.19	592.673	201.748	1053.46	716.628	-132.385	1039.52	728.052	24.2913	1007.38	613.63	303.173	730.136	535.096	168.527	961.78	437.486	197.658	995.367	497.769	137.117	1059.88	443.981	46.1772	1116.91	436.024	-208.595	675.819	621.568	-159.736	744.757	350.203	-96.1961	760.432	377.991	-97.7156	763.16	276.808	-63.7088	731.305	175.882
268	2.67	26.2323	1228.64	546.513	101.579	1226.04	583.293	-43.8351	1221.29	592.821	201.274	1052.87	716.662	-132.357	1039.66	728.119	24.3335	1007.49	613.615	302.695	730.808	534.089	167.749	963.264	439.081	197.57	996.377	499.096	136.591	1061.48	446.4	45.7936	1118.67	439.466	-208.635	675.911	621.609	-159.708	744.765	350.208	-96.1632	760.409	378.058	-97.6933	763.196	276.808	-63.6545	731.284	175.932
269	2.68	26.1639	1228.81	546.614	101.524	1226.19	583.247	-43.8605	1221.4	592.931	200.991	1052.93	717.096	-132.223	1039.96	728.543	24.5437	1007.41	614.08	302.206	731.503	533.041	167.027	964.769	440.519	197.34	997.349	500.476	136.024	1063.07	448.758	45.4691	1120.47	443.159	-208.689	675.983	621.624	-159.683	744.756	350.198	-96.1324	760.398	378.015	-97.6637	763.182	276.822	-63.622	731.284	175.899
270	2.69	26.0704	1229.02	546.569	101.452	1226.34	583.153	-43.8953	1221.5	592.99	200.754	1053.16	717.614	-132.026	1040.32	729.208	24.7408	1007.29	614.468	301.685	732.18	531.998	166.263	966.292	441.784	197.205	998.38	501.825	135.507	1064.65	451.166	45.1568	1122.29	447.033	-208.751	675.998	621.56	-159.688	744.746	350.156	-96.1262	760.415	377.93	-97.6495	763.156	276.794	-63.6345	731.311	175.835
271	2.7	25.9873	1229.24	546.607	101.368	1226.5	583.095	-43.9384	1221.6	593.055	200.51	1053.45	718.203	-131.848	1040.76	730.006	24.7845	1007.24	614.627	301.101	732.904	530.87	165.351	967.901	443.072	197.1	999.429	503.054	134.918	1066.21	453.567	44.7851	1124.13	451.087	-208.815	675.981	621.48	-159.741	744.768	350.13	-96.1687	760.45	377.935	-97.6731	763.122	276.79	-63.6952	731.326	175.836
272	2.71	25.9052	1229.47	546.574	101.335	1226.7	583.096	-43.9864	1221.7	593.148	200.24	1053.77	718.835	-131.67	1041.2	730.822	24.7378	1007.29	614.622	300.567	733.644	529.866	164.465	969.423	444.475	197.066	1000.62	504.28	134.364	1067.76	455.9	44.5084	1125.96	455.078	-208.862	675.965	621.448	-159.802	744.801	350.167	-96.2253	760.484	377.986	-97.7053	763.106	276.85	-63.7544	731.352	175.85
273	2.72	25.8877	1229.74	546.37	101.35	1226.88	583.06	-43.9737	1221.78	593.19	200.4	1054.18	718.817	-131.481	1041.2	731.056	24.6947	1007.43	614.415	300.082	734.41	528.873	163.615	970.916	445.731	196.937	1001.64	505.536	133.836	1069.21	458.219	44.119	1127.83	459.038	-208.877	676.019	621.475	-159.819	744.835	350.176	-96.2671	760.506	378	-97.6974	763.117	276.87	-63.7741	731.39	175.849
274	2.73	25.9877	1229.92	546.289	101.437	1227.04	583.075	-43.8941	1221.82	593.149	201.149	1054.59	717.935	-131.408	1040.63	730.34	24.6152	1007.48	613.852	299.612	735.157	527.917	162.862	972.485	446.835	196.756	1002.56	506.757	133.372	1070.62	460.526	43.6852	1129.72	463.405	-208.874	676.115	621.518	-159.786	744.857	350.154	-96.2349	760.522	377.953	-97.6693	763.158	276.821	-63.7419	731.425	175.825
275	2.74	26.1391	1230.01	546.33	101.593	1227.14	583.159	-43.7794	1221.81	593.07	201.37	1054.81	717.872	-131.338	1040.51	730.139	24.4371	1007.39	612.945	299.123	735.869	526.869	162.11	973.79	448.385	196.785	1003.65	507.822	132.961	1072.03	462.969	43.325	1131.3	467.282	-208.901	676.207	621.582	-159.734	744.85	350.124	-96.1753	760.518	377.917	-97.6483	763.186	276.777	-63.6752	731.408	175.794
276	2.75	26.277	1230.07	546.409	101.746	1227.2	583.226	-43.6339	1221.78	592.962	201.403	1054.83	717.895	-131.291	1040.52	730.074	24.6675	1007.47	613.21	298.643	736.542	525.768	161.379	975.099	449.804	196.673	1004.56	508.923	132.532	1073.33	465.302	42.9612	1132.79	470.789	-208.922	676.258	621.601	-159.682	744.828	350.1	-96.1208	760.493	377.908	-97.6076	763.195	276.789	-63.6037	731.349	175.814
277	2.76	26.409	1230.09	546.558	101.86	1227.24	583.332	-43.5187	1221.72	592.914	201.346	1054.63	717.803	-131.266	1040.56	730.048	24.9739	1007.52	613.849	298.132	737.221	524.765	160.611	976.329	451.252	196.404	1005.31	510.108	132.08	1074.6	467.514	42.7174	1134.28	474.429	-208.968	676.28	621.575	-159.671	744.799	350.119	-96.0956	760.462	377.922	-97.5984	763.175	276.784	-63.5865	731.301	175.86
278	2.77	26.4878	1230.07	546.703	101.933	1227.28	583.441	-43.4661	1221.67	592.912	201.267	1054.67	717.911	-131.266	1040.59	730.066	25.2503	1007.43	614.767	297.622	737.928	523.869	159.653	977.547	452.701	196.233	1006.23	511.322	131.542	1075.85	469.724	42.7067	1135.74	478.414	-209.033	676.292	621.544	-159.695	744.78	350.176	-96.1337	760.451	377.972	-97.6478	763.146	276.802	-63.633	731.269	175.913
279	2.78	26.5108	1230.08	546.724	101.959	1227.35	583.433	-43.4295	1221.63	592.851	201.147	1054.81	718.049	-131.276	1040.6	730.038	25.4265	1007.32	615.501	297.077	738.622	522.86	158.79	978.772	454.117	196.086	1007.24	512.381	131.052	1077.08	471.886	42.5446	1137.12	481.942	-209.09	676.318	621.529	-159.752	744.798	350.18	-96.1874	760.449	377.955	-97.6899	763.13	276.818	-63.6912	731.272	175.9
280	2.79	26.5576	1230.14	546.591	101.979	1227.43	583.327	-43.3721	1221.61	592.692	201.018	1054.94	718.172	-131.248	1040.61	729.997	25.5427	1007.33	615.72	296.511	739.312	521.822	157.936	980.043	455.316	195.887	1008.12	513.376	130.597	1078.25	473.929	42.3627	1138.5	485.265	-209.099	676.357	621.522	-159.771	744.801	350.149	-96.1854	760.451	377.937	-97.6726	763.115	276.809	-63.7264	731.302	175.837
281	2.8	26.6319	1230.22	546.423	102.031	1227.55	583.207	-43.2989	1221.57	592.557	200.922	1055.02	718.28	-131.206	1040.64	729.975	25.6317	1007.41	615.694	295.948	740.018	520.917	157.187	981.254	456.558	195.748	1008.95	514.423	130.227	1079.42	476.035	42.3203	1139.85	488.673	-209.076	676.411	621.543	-159.756	744.821	350.126	-96.1675	760.492	377.907	-97.6392	763.129	276.799	-63.7153	731.335	175.814
282	2.81	26.7266	1230.27	546.301	102.126	1227.67	583.179	-43.2319	1221.54	592.419	200.835	1055.09	718.427	-131.152	1040.7	729.979	25.6976	1007.58	615.579	295.448	740.707	520.123	156.429	982.534	457.618	195.571	1009.73	515.583	129.861	1080.54	478.165	42.3333	1141.29	491.924	-209.035	676.493	621.622	-159.75	744.888	350.095	-96.1697	760.548	377.906	-97.629	763.193	276.768	-63.7124	731.395	175.814
283	2.82	26.8485	1230.34	546.085	102.229	1227.78	583.122	-43.1451	1221.48	592.295	200.77	1055.14	718.541	-131.091	1040.76	729.992	25.7297	1007.83	615.232	294.983	741.326	519.305	155.807	983.687	458.846	195.369	1010.39	516.684	129.6	1081.62	480.246	42.4947	1142.62	495.266	-208.96	676.576	621.654	-159.722	744.935	350.077	-96.1687	760.604	377.855	-97.6144	763.247	276.714	-63.7025	731.448	175.782
284	2.83	26.9818	1230.33	545.971	102.364	1227.83	583.098	-43.0272	1221.39	592.134	200.752	1055.14	718.635	-131.025	1040.79	729.98	25.7598	1008.05	614.867	294.458	741.878	518.414	155.249	984.88	460.001	195.332	1011.13	517.721	129.367	1082.64	482.285	42.6771	1143.83	498.481	-208.9	676.631	621.689	-159.668	744.925	350.095	-96.1131	760.613	377.825	-97.589	763.247	276.692	-63.6544	731.439	175.753
285	2.84	27.1032	1230.27	545.941	102.479	1227.83	583.118	-42.9429	1221.24	592.025	200.741	1055.12	718.75	-130.974	1040.79	729.976	25.8353	1008.08	614.912	293.868	742.404	517.552	154.672	985.804	461.212	195.247	1011.76	518.804	129.215	1083.52	484.416	42.8171	1144.93	501.587	-208.884	676.623	621.712	-159.64	744.864	350.107	-96.068	760.56	377.832	-97.5966	763.216	276.707	-63.6166	731.376	175.773
286	2.85	27.1602	1230.24	545.907	102.51	1227.84	583.079	-42.9396	1221.1	591.914	200.701	1055.15	718.841	-130.98	1040.81	729.948	25.9141	1007.95	615.199	293.324	742.862	516.895	154.061	986.684	462.476	195.118	1012.32	519.777	129.007	1084.4	486.308	42.9096	1146.05	504.563	-208.912	676.554	621.633	-159.645	744.807	350.123	-96.0788	760.494	377.868	-97.6216	763.149	276.756	-63.6227	731.296	175.817
287	2.86	27.1621	1230.22	545.887	102.48	1227.88	582.986	-42.9639	1220.98	591.802	200.633	1055.23	718.939	-131.029	1040.88	729.898	25.9745	1007.79	615.601	292.756	743.298	516.188	153.491	987.57	463.55	194.902	1012.9	520.648	128.744	1085.21	488.15	43.0186	1147.14	507.35	-208.943	676.499	621.544	-159.687	744.778	350.145	-96.1093	760.445	377.894	-97.6384	763.087	276.812	-63.6793	731.243	175.841
288	2.87	27.11	1230.24	545.804	102.425	1227.96	582.868	-42.9773	1220.92	591.702	200.564	1055.32	719.064	-130.984	1040.98	730.03	26.0152	1007.7	615.904	292.119	743.785	515.442	152.927	988.373	464.744	194.722	1013.45	521.464	128.443	1086.01	489.845	43.1917	1148.1	510.105	-208.995	676.507	621.53	-159.73	744.792	350.142	-96.1481	760.439	377.919	-97.6502	763.065	276.833	-63.7565	731.256	175.83
289	2.88	27.1241	1230.29	545.706	102.419	1228.08	582.8	-42.9715	1220.89	591.554	200.49	1055.4	719.196	-130.929	1041.1	730.187	26.0547	1007.71	615.955	291.466	744.221	514.721	152.346	989.235	465.628	194.57	1013.93	522.211	128.176	1086.76	491.339	43.3845	1149.02	512.52	-209.014	676.576	621.561	-159.741	744.83	350.139	-96.1693	760.485	377.906	-97.6456	763.09	276.848	-63.7697	731.293	175.833
290	2.89	27.2346	1230.36	545.484	102.483	1228.21	582.741	-42.9044	1220.86	591.311	200.434	1055.44	719.286	-130.861	1041.18	730.237	26.1409	1007.84	615.766	290.938	744.638	514.025	151.804	990.109	466.311	194.465	1014.42	522.963	128.056	1087.5	492.942	43.6129	1149.92	514.766	-208.978	676.682	621.586	-159.711	744.88	350.127	-96.1195	760.551	377.869	-97.6031	763.15	276.788	-63.7144	731.353	175.805
291	2.9	27.3789	1230.46	545.168	102.609	1228.34	582.663	-42.784	1220.81	591.015	200.414	1055.46	719.334	-130.772	1041.23	730.196	26.2651	1008.06	615.406	290.516	745.053	513.449	151.424	990.883	466.954	194.391	1014.88	523.702	127.893	1088.16	494.294	43.8726	1150.74	516.857	-208.935	676.792	621.639	-159.638	744.928	350.052	-96.0307	760.6	377.796	-97.5121	763.226	276.685	-63.6094	731.416	175.716
292	2.91	27.5394	1230.55	544.997	102.73	1228.42	582.654	-42.6914	1220.79	590.81	200.413	1055.46	719.431	-130.684	1041.27	730.19	26.3807	1008.25	615.18	290.075	745.414	513.031	151.037	991.524	467.736	194.258	1015.29	524.436	127.727	1088.77	495.479	44.1014	1151.46	518.653	-208.767	676.923	621.625	-159.572	744.952	350.04	-95.951	760.625	377.752	-97.4598	763.274	276.669	-63.5327	731.454	175.68
293	2.92	27.6419	1230.56	544.976	102.789	1228.47	582.689	-42.6669	1220.75	590.725	200.383	1055.47	719.515	-130.647	1041.28	730.178	26.4085	1008.35	615.045	289.565	745.718	512.608	150.567	992.145	468.64	194.05	1015.62	525.104	127.573	1089.31	496.839	44.2491	1152.07	520.436	-208.599	676.998	621.514	-159.572	744.956	350.07	-95.9406	760.638	377.767	-97.4723	763.294	276.684	-63.5087	731.449	175.684
294	2.93	27.6435	1230.53	544.871	102.773	1228.48	582.671	-42.6839	1220.65	590.618	200.322	1055.49	719.554	-130.668	1041.26	730.135	26.3658	1008.31	615.035	288.97	745.979	512.025	150.11	992.78	469.259	193.783	1015.9	525.687	127.356	1089.74	498.196	44.2174	1152.35	522.795	-208.881	676.865	621.621	-159.616	744.915	350.072	-95.9913	760.587	377.797	-97.5266	763.236	276.714	-63.5519	731.398	175.736
295	2.94	27.6106	1230.44	544.837	102.728	1228.46	582.639	-42.7366	1220.5	590.545	200.255	1055.49	719.54	-130.727	1041.22	730.06	26.3348	1008.09	615.296	288.415	746.168	511.472	149.696	993.219	470.002	193.511	1016.13	526.226	127.093	1090.11	499.242	44.0174	1152.14	526.122	-209.024	676.722	621.557	-159.678	744.839	350.091	-96.0814	760.501	377.859	-97.5937	763.117	276.794	-63.647	731.324	175.809
296	2.95	27.5754	1230.32	544.923	102.658	1228.45	582.605	-42.7967	1220.4	590.491	200.191	1055.5	719.544	-130.783	1041.21	730.025	26.2962	1007.84	615.658	287.75	746.389	510.773	149.281	993.527	470.82	193.263	1016.32	526.798	126.829	1090.5	500.116	43.8942	1152.28	528.243	-209.119	676.616	621.499	-159.75	744.789	350.125	-96.1648	760.437	377.91	-97.6613	763.037	276.822	-63.7352	731.262	175.849
297	2.96	27.5665	1230.23	544.941	102.606	1228.44	582.562	-42.7982	1220.32	590.4	200.126	1055.54	719.589	-130.823	1041.21	729.994	26.2638	1007.72	615.886	286.885	746.715	509.737	148.897	993.885	471.414	193.01	1016.47	527.361	126.602	1090.84	501.076	43.8079	1152.53	529.833	-209.167	676.598	621.489	-159.795	744.779	350.136	-96.2223	760.424	377.924	-97.703	763.016	276.822	-63.78	731.244	175.83
298	2.97	27.6098	1230.19	544.856	102.623	1228.44	582.553	-42.761	1220.28	590.284	200.071	1055.56	719.595	-130.834	1041.22	729.978	26.2664	1007.76	615.852	286.359	746.938	509.318	148.606	994.348	471.738	192.777	1016.63	527.852	126.412	1091.12	502.083	43.8055	1152.79	531.343	-209.162	676.663	621.509	-159.774	744.8	350.121	-96.2164	760.445	377.929	-97.6895	763.048	276.797	-63.7653	731.259	175.808
299	2.98	27.6962	1230.19	544.72	102.703	1228.46	582.529	-42.7212	1220.3	590.151	200.044	1055.58	719.594	-130.816	1041.27	730	26.2604	1007.97	615.511	285.95	747.14	509.037	148.365	994.85	471.939	192.569	1016.77	528.281	126.24	1091.35	503.023	43.8109	1153.1	532.632	-209.131	676.781	621.559	-159.712	744.86	350.089	-96.1767	760.505	377.897	-97.627	763.141	276.737	-63.7099	731.315	175.785
300	2.99	27.7812	1230.23	544.564	102.774	1228.48	582.514	-42.672	1220.32	590.028	200.028	1055.58	719.573	-130.779	1041.3	729.988	26.2812	1008.21	615.138	285.565	747.292	508.725	148.152	995.304	472.11	192.388	1016.88	528.636	126.068	1091.59	503.73	43.7732	1153.39	533.644	-209.092	676.916	621.66	-159.653	744.916	350.055	-96.1017	760.595	377.762	-97.5576	763.252	276.67	-63.6179	731.388	175.73
301	3	27.8211	1230.21	544.465	102.818	1228.46	582.495	-42.645	1220.31	589.933	200.025	1055.57	719.554	-130.739	1041.3	729.99	26.3265	1008.31	614.91	285.151	747.395	508.391	147.94	995.564	472.4	192.242	1016.93	528.989	125.868	1091.8	504.335	43.7351	1153.6	534.573	-209.057	676.96	621.709	-159.606	744.93	350.013	-96.0158	760.65	377.666	-97.4993	763.287	276.631	-63.5372	731.43	175.645
302	3.01	27.8353	1230.12	544.466	102.807	1228.42	582.486	-42.6763	1220.25	589.879	200.018	1055.55	719.533	-130.744	1041.26	730.015	26.3261	1008.24	614.959	284.721	747.429	508.101	147.672	995.663	472.745	192.05	1016.92	529.312	125.638	1091.9	504.948	43.6877	1153.72	535.587	-209.047	676.875	621.642	-159.609	744.916	350.005	-95.9899	760.632	377.688	-97.4916	763.25	276.647	-63.5289	731.416	175.64
303	3.02	27.7306	1230.03	544.484	102.719	1228.37	582.493	-42.7626	1220.18	589.921	199.979	1055.52	719.515	-130.795	1041.21	730.044	26.2732	1008.05	615.309	284.332	747.406	507.962	147.342	995.663	473.114	191.818	1016.91	529.612	125.355	1091.92	505.501	43.5836	1153.83	536.529	-209.083	676.753	621.595	-159.658	744.878	350.038	-96.0571	760.56	377.766	-97.5449	763.181	276.71	-63.6072	731.355	175.723
304	3.03	27.5779	1229.94	544.523	102.565	1228.34	582.433	-42.8777	1220.14	589.956	199.926	1055.49	719.491	-130.87	1041.17	730.046	26.205	1007.82	615.732	283.99	747.372	507.889	146.987	995.585	473.594	191.564	1016.87	529.813	125.057	1091.91	505.978	43.4567	1153.97	537.21	-209.126	676.609	621.492	-159.727	744.823	350.063	-96.1466	760.491	377.862	-97.6244	763.099	276.782	-63.6984	731.288	175.79
305	3.04	27.4425	1229.89	544.513	102.434	1228.32	582.398	-42.9784	1220.11	589.979	199.883	1055.47	719.5	-130.933	1041.13	730.044	26.1466	1007.68	615.969	283.672	747.38	507.784	146.639	995.544	473.942	191.321	1016.85	529.97	124.798	1091.89	506.37	43.3127	1154.15	537.648	-209.154	676.514	621.422	-159.774	744.777	350.118	-96.1962	760.448	377.921	-97.6849	763.037	276.818	-63.7461	731.258	175.829
306	3.05	27.3477	1229.93	544.498	102.341	1228.35	582.347	-43.0585	1220.09	589.998	199.855	1055.47	719.542	-130.97	1041.15	730.047	26.0977	1007.67	615.92	283.398	747.425	507.647	146.349	995.626	474.051	191.105	1016.86	530.08	124.581	1091.91	506.629	43.225	1154.34	537.862	-209.147	676.521	621.44	-159.786	744.793	350.135	-96.2129	760.461	377.93	-97.6773	763.054	276.834	-63.7346	731.281	175.814
307	3.06	27.2778	1229.97	544.422	102.292	1228.4	582.282	-43.1088	1220.07	589.987	199.838	1055.45	719.544	-130.968	1041.19	730.085	26.1059	1007.76	615.697	283.189	747.475	507.542	146.126	995.734	474.044	190.915	1016.89	530.141	124.404	1091.93	506.783	43.1843	1154.53	537.924	-209.104	676.595	621.542	-159.745	744.837	350.111	-96.1773	760.506	377.9	-97.6301	763.102	276.829	-63.6861	731.342	175.792
308	3.07	27.2554	1230	544.376	102.261	1228.45	582.228	-43.1449	1220.07	589.982	199.834	1055.43	719.524	-130.955	1041.21	730.083	26.1238	1007.89	615.419	283.004	747.524	507.486	145.962	995.83	473.958	190.748	1016.9	530.137	124.254	1091.96	506.877	43.1619	1154.68	537.934	-209.06	676.689	621.628	-159.679	744.887	350.097	-96.1018	760.575	377.828	-97.579	763.19	276.745	-63.6228	731.418	175.754
309	3.08	27.2211	1230	544.392	102.224	1228.47	582.228	-43.2051	1220.07	590.014	199.832	1055.42	719.509	-130.96	1041.22	730.056	26.1151	1007.99	615.181	282.822	747.513	507.441	145.81	995.839	473.89	190.581	1016.88	530.086	124.109	1091.97	506.906	43.1263	1154.72	537.991	-209.039	676.779	621.72	-159.633	744.906	350.047	-96.0418	760.622	377.766	-97.5271	763.256	276.69	-63.5621	731.455	175.695
310	3.09	27.0985	1229.93	544.528	102.118	1228.46	582.246	-43.2947	1220.05	590.039	199.823	1055.4	719.5	-130.975	1041.18	730.073	26.0866	1007.94	615.219	282.622	747.448	507.387	145.6	995.768	473.833	190.39	1016.79	530.021	123.967	1091.94	506.873	43.018	1154.7	538.062	-209.036	676.767	621.717	-159.62	744.876	350.049	-96.0452	760.585	377.747	-97.5239	763.258	276.683	-63.57	731.436	175.69
311	3.1	26.9156	1229.8	544.697	101.964	1228.41	582.266	-43.4298	1219.97	590.048	199.813	1055.36	719.499	-131.01	1041.12	730.091	26.0281	1007.76	615.489	282.422	747.336	507.379	145.373	995.621	473.874	190.19	1016.67	529.951	123.837	1091.86	506.81	42.8695	1154.63	538.147	-209.051	676.672	621.639	-159.656	744.83	350.074	-96.0865	760.518	377.797	-97.5599	763.193	276.698	-63.6161	731.345	175.756
312	3.11	26.7509	1229.64	544.937	101.81	1228.36	582.318	-43.5928	1219.87	590.2	199.797	1055.32	719.503	-131.062	1041.04	730.101	25.917	1007.6	615.717	282.245	747.214	507.403	145.175	995.445	473.927	190.001	1016.54	529.87	123.707	1091.76	506.727	42.7067	1154.51	538.283	-209.092	676.537	621.569	-159.717	744.755	350.128	-96.1693	760.435	377.876	-97.6435	763.097	276.772	-63.6743	731.227	175.835
313	3.12	26.5882	1229.58	545.076	101.663	1228.37	582.355	-43.7562	1219.79	590.349	199.769	1055.28	719.534	-131.111	1040.99	730.125	25.8389	1007.5	615.917	282.086	747.122	507.406	144.996	995.349	473.822	189.841	1016.45	529.775	123.598	1091.69	506.602	42.5366	1154.48	538.263	-209.124	676.414	621.497	-159.776	744.711	350.17	-96.2424	760.398	377.942	-97.7074	763.032	276.825	-63.7367	731.188	175.869
314	3.13	26.4719	1229.64	545.091	101.559	1228.45	582.373	-43.8713	1219.77	590.43	199.735	1055.27	719.547	-131.145	1040.99	730.174	25.8241	1007.53	615.973	281.964	747.101	507.419	144.862	995.38	473.575	189.719	1016.44	529.678	123.517	1091.67	506.447	42.4276	1154.57	538.06	-209.122	676.375	621.479	-159.804	744.734	350.166	-96.2783	760.395	377.964	-97.7095	763.02	276.843	-63.7577	731.206	175.875
315	3.14	26.4255	1229.77	545.041	101.501	1228.58	582.407	-43.9378	1219.83	590.445	199.701	1055.27	719.514	-131.161	1041.02	730.193	25.8174	1007.71	615.714	281.912	747.172	507.449	144.81	995.528	473.215	189.631	1016.48	529.532	123.458	1091.7	506.255	42.4064	1154.71	537.86	-209.108	676.433	621.51	-159.799	744.792	350.125	-96.2619	760.449	377.961	-97.6829	763.066	276.818	-63.7495	731.284	175.838
316	3.15	26.4043	1229.96	544.864	101.461	1228.71	582.43	-43.989	1219.89	590.389	199.675	1055.28	719.452	-131.165	1041.06	730.205	25.824	1007.92	615.411	281.878	747.265	507.382	144.781	995.711	472.814	189.555	1016.54	529.404	123.401	1091.77	506.043	42.4485	1154.9	537.608	-209.064	676.534	621.568	-159.748	744.856	350.08	-96.1868	760.539	377.883	-97.6369	763.14	276.783	-63.6842	731.393	175.747
317	3.16	26.3505	1230.13	544.737	101.412	1228.81	582.462	-44.0349	1219.93	590.381	199.662	1055.3	719.433	-131.176	1041.09	730.25	25.8509	1008.06	615.294	281.829	747.342	507.292	144.739	995.819	472.532	189.492	1016.59	529.332	123.36	1091.84	505.851	42.4897	1155.06	537.346	-209.036	676.621	621.668	-159.705	744.905	350.048	-96.1136	760.603	377.803	-97.5869	763.2	276.777	-63.6252	731.453	175.687
318	3.17	26.2741	1230.15	544.867	101.362	1228.86	582.573	-44.1016	1219.93	590.42	199.653	1055.31	719.454	-131.204	1041.07	730.267	25.8779	1008.02	615.438	281.773	747.362	507.262	144.709	995.791	472.507	189.45	1016.58	529.267	123.342	1091.86	505.76	42.5352	1155.1	537.378	-209.039	676.614	621.697	-159.691	744.9	350.053	-96.0745	760.614	377.819	-97.5486	763.22	276.766	-63.5909	731.456	175.68
319	3.18	26.1677	1230.06	545.115	101.26	1228.84	582.667	-44.2096	1219.88	590.473	199.627	1055.33	719.45	-131.257	1041	730.262	25.8606	1007.85	615.78	281.702	747.337	507.234	144.641	995.653	472.694	189.391	1016.56	529.24	123.333	1091.85	505.745	42.5525	1155.07	537.577	-209.071	676.519	621.664	-159.692	744.848	350.082	-96.0971	760.568	377.873	-97.5527	763.208	276.769	-63.6051	731.411	175.715
320	3.19	26.0415	1229.95	545.358	101.117	1228.8	582.726	-44.3533	1219.82	590.525	199.592	1055.34	719.432	-131.306	1040.92	730.23	25.8245	1007.62	616.191	281.602	747.289	507.168	144.537	995.538	472.889	189.332	1016.54	529.248	123.322	1091.84	505.751	42.5448	1155.04	537.78	-209.097	676.352	621.526	-159.71	744.78	350.122	-96.1448	760.494	377.857	-97.5994	763.164	276.785	-63.6541	731.329	175.785
321	3.2	25.902	1229.87	545.579	100.965	1228.79	582.768	-44.4805	1219.74	590.598	199.558	1055.34	719.447	-131.351	1040.84	730.215	25.7792	1007.46	616.438	281.53	747.27	507.151	144.453	995.519	473.024	189.28	1016.55	529.278	123.31	1091.89	505.788	42.5469	1155.02	537.982	-209.081	676.215	621.432	-159.744	744.725	350.135	-96.1881	760.439	377.881	-97.6452	763.123	276.813	-63.7009	731.239	175.845
322	3.21	25.8025	1229.9	545.578	100.847	1228.82	582.811	-44.5805	1219.71	590.666	199.518	1055.34	719.466	-131.387	1040.77	730.203	25.7339	1007.46	616.409	281.464	747.313	507.137	144.429	995.597	473.08	189.267	1016.6	529.296	123.347	1091.97	505.864	42.5641	1155.09	538.013	-209.031	676.117	621.381	-159.771	744.717	350.143	-96.2109	760.419	377.9	-97.6715	763.114	276.804	-63.7139	731.226	175.834
323	3.22	25.747	1229.99	545.458	100.762	1228.92	582.764	-44.6559	1219.72	590.64	199.473	1055.34	719.493	-131.408	1040.74	730.177	25.7041	1007.6	616.1	281.408	747.394	507.094	144.458	995.821	472.889	189.28	1016.69	529.295	123.417	1092.09	505.935	42.6342	1155.27	537.906	-208.987	676.085	621.429	-159.756	744.745	350.126	-96.2114	760.446	377.878	-97.6656	763.131	276.765	-63.6971	731.295	175.781
324	3.23	25.694	1230.12	545.28	100.695	1229.02	582.679	-44.7243	1219.73	590.535	199.417	1055.34	719.498	-131.421	1040.73	730.173	25.6881	1007.8	615.65	281.355	747.503	507.03	144.548	996.118	472.578	189.293	1016.79	529.311	123.488	1092.25	505.994	42.6957	1155.48	537.742	-208.917	676.086	621.448	-159.719	744.787	350.086	-96.1801	760.497	377.838	-97.6399	763.183	276.696	-63.6624	731.374	175.712
325	3.24	25.6427	1230.18	545.166	100.64	1229.08	582.673	-44.7862	1219.72	590.474	199.38	1055.36	719.53	-131.436	1040.71	730.21	25.6836	1007.96	615.4	281.305	747.612	506.98	144.672	996.351	472.367	189.286	1016.91	529.35	123.555	1092.41	506.004	42.7493	1155.62	537.66	-208.863	676.114	621.489	-159.688	744.826	350.074	-96.1335	760.549	377.826	-97.6184	763.229	276.689	-63.6252	731.419	175.687
326	3.25	25.5545	1230.16	545.15	100.529	1229.11	582.623	-44.8772	1219.67	590.469	199.353	1055.39	719.551	-131.47	1040.71	730.203	25.6953	1007.98	615.443	281.221	747.683	506.939	144.758	996.517	472.167	189.235	1017.01	529.373	123.591	1092.53	505.951	42.7496	1155.7	537.638	-208.862	676.141	621.544	-159.691	744.84	350.063	-96.1363	760.563	377.816	-97.6102	763.248	276.675	-63.6353	731.444	175.672
327	3.26	25.4164	1230.09	545.149	100.391	1229.08	582.585	-44.9984	1219.57	590.473	199.326	1055.41	719.552	-131.518	1040.68	730.193	25.7058	1007.83	615.738	281.112	747.721	506.882	144.813	996.576	472.039	189.159	1017.02	529.289	123.573	1092.57	505.788	42.7154	1155.69	537.575	-208.868	676.087	621.477	-159.725	744.821	350.051	-96.1661	760.517	377.821	-97.6296	763.204	276.659	-63.6674	731.418	175.686
328	3.27	25.2473	1229.92	545.24	100.254	1229.03	582.615	-45.1324	1219.44	590.516	199.323	1055.43	719.601	-131.581	1040.64	730.214	25.7017	1007.59	616.227	281.033	747.707	506.924	144.857	996.534	471.992	189.099	1017	529.206	123.564	1092.58	505.609	42.6622	1155.6	537.555	-208.894	675.981	621.404	-159.777	744.778	350.098	-96.1879	760.474	377.843	-97.6705	763.149	276.722	-63.7191	731.35	175.726
329	3.28	25.0792	1229.76	545.386	100.138	1228.98	582.643	-45.2578	1219.31	590.585	199.354	1055.44	719.672	-131.624	1040.61	730.25	25.7102	1007.42	616.642	280.985	747.643	507.046	144.923	996.46	471.908	189.071	1016.94	529.123	123.634	1092.54	505.427	42.6327	1155.55	537.455	-208.918	675.859	621.352	-159.804	744.738	350.136	-96.2188	760.441	377.862	-97.693	763.111	276.785	-63.7537	731.295	175.776
330	3.29	24.9974	1229.65	545.407	100.056	1228.94	582.649	-45.325	1219.21	590.552	199.384	1055.42	719.691	-131.633	1040.56	730.287	25.7326	1007.39	616.769	280.992	747.521	507.2	145.065	996.379	471.697	189.109	1016.84	528.983	123.786	1092.47	505.14	42.6636	1155.51	537.163	-208.879	675.795	621.32	-159.799	744.699	350.142	-96.2205	760.415	377.903	-97.6884	763.088	276.798	-63.7542	731.271	175.771
331	3.3	25.0048	1229.59	545.415	100.046	1228.94	582.651	-45.3598	1219.18	590.499	199.424	1055.41	719.681	-131.599	1040.53	730.323	25.749	1007.49	616.631	281.078	747.371	507.447	145.324	996.287	471.461	189.233	1016.75	528.807	124.021	1092.42	504.765	42.7815	1155.52	536.783	-208.808	675.831	621.376	-159.75	744.7	350.149	-96.1717	760.41	377.932	-97.6635	763.126	276.779	-63.7109	731.281	175.776
332	3.31	25.0337	1229.65	545.338	100.075	1228.98	582.651	-45.368	1219.21	590.455	199.467	1055.42	719.681	-131.563	1040.52	730.363	25.7659	1007.73	616.372	281.196	747.209	507.736	145.63	996.189	471.203	189.407	1016.68	528.632	124.287	1092.37	504.312	42.9603	1155.58	536.151	-208.721	675.93	621.502	-159.681	744.735	350.146	-96.1122	760.433	377.939	-97.6303	763.196	276.744	-63.637	731.312	175.803
333	3.32	25.0281	1229.72	545.187	100.087	1229.05	582.591	-45.3651	1219.24	590.404	199.494	1055.4	719.615	-131.541	1040.53	730.379	25.7627	1007.96	616.064	281.274	747.045	507.996	145.932	996.089	470.834	189.564	1016.6	528.38	124.516	1092.32	503.724	43.1808	1155.67	535.244	-208.657	675.992	621.584	-159.626	744.763	350.13	-96.0491	760.488	377.887	-97.5896	763.245	276.759	-63.5544	731.343	175.793
[truncated: 602 more rows]

## Sheet: Trial02
PathFileType	4	(X/Y/Z)	Trial02.trc
DataRate	CameraRate	NumFrames	NumMarkers	Units	OrigDataRate	OrigDataStartFrame	OrigNumFrames
100	100	981	16	mm	100	1	981
[truncated: 983 more rows]

## Sheet: Trial03
PathFileType	4	(X/Y/Z)	Trial03.trc
DataRate	CameraRate	NumFrames	NumMarkers	Units	OrigDataRate	OrigDataStartFrame	OrigNumFrames
[truncated: 1,031 more rows]

## Sheet: Trial04
PathFileType	4	(X/Y/Z)	Trial04.trc
[truncated: 889 more rows]

[truncated: 1 more sheets: Trial05]
