# Supplementary material for: Upper-Limb Kinematic Variables are correlated with Fugl-Meyer Assessment Sub Scales During a Hand-to-Mouth Functional Task in Post-Stroke Individuals
Source: Research Square preprint supplement (doi:10.21203/rs.3.rs-8270137/v1), 2025-12-16
Supplement: Supplementary file 16 [file Additional file 14.xls]

## Sheet: Static
PathFileType	4	(X/Y/Z)	Static.trc
DataRate	CameraRate	NumFrames	NumMarkers	Units	OrigDataRate	OrigDataStartFrame	OrigNumFrames
100	100	725	17	mm	100	1	725
Frame#	Time	nasion			r zyg pr			l zyg pr			r should			l should			sternum			r elbow			r ulna			r radius			r hand			r finger			l elbow			l ulna			l radius			l hand			l finger
		X1	Y1	Z1	X2	Y2	Z2	X3	Y3	Z3	X4	Y4	Z4	X5	Y5	Z5	X6	Y6	Z6	X7	Y7	Z7	X8	Y8	Z8	X9	Y9	Z9	X10	Y10	Z10	X11	Y11	Z11	X12	Y12	Z12	X13	Y13	Z13	X14	Y14	Z14	X15	Y15	Z15	X16	Y16	Z16
1	0	3.42277	1094.54	770.906	72.3387	1092.06	818.449	-68.0427	1102.42	809.07	147.849	958.865	875.897	-133.463	963.671	865.429	11.46	913.301	808.43	255.379	640.413	878.791	231.986	738.436	656.855	163.215	742.516	659.681	194.686	758.876	587.538	180.717	730.928	497.184	-244.276	659.312	868.709	-209.61	738.417	644.046	-147.932	746.37	662.415	-155.123	756.29	585.672	-137.294	731.251	498.135
2	0.01	3.44758	1094.56	770.974	72.3674	1092.06	818.539	-68.0216	1102.45	809.08	147.863	958.858	875.927	-133.453	963.709	865.451	11.4783	913.296	808.531	255.392	640.424	878.82	232.021	738.428	656.908	163.222	742.496	659.691	194.668	758.897	587.571	180.751	730.944	497.279	-244.294	659.346	868.699	-209.59	738.413	644.104	-147.933	746.355	662.459	-155.116	756.304	585.681	-137.3	731.241	498.149
3	0.02	3.49346	1094.55	770.993	72.4084	1092.05	818.591	-67.9789	1102.42	809.077	147.915	958.812	875.938	-133.427	963.689	865.419	11.532	913.232	808.631	255.388	640.429	878.804	232.064	738.38	656.926	163.277	742.416	659.755	194.674	758.881	587.567	180.8	730.915	497.313	-244.3	659.363	868.664	-209.559	738.359	644.107	-147.897	746.284	662.484	-155.101	756.288	585.658	-137.257	731.18	498.164
4	0.03	3.51371	1094.55	770.971	72.4474	1092.03	818.626	-67.9276	1102.38	809.122	147.961	958.77	875.969	-133.377	963.671	865.425	11.5954	913.123	808.803	255.395	640.434	878.799	232.119	738.331	656.942	163.35	742.338	659.811	194.688	758.867	587.52	180.85	730.879	497.309	-244.313	659.359	868.628	-209.765	738.43	643.516	-147.836	746.207	662.464	-155.299	756.783	584.701	-137.114	731.498	497.523
5	0.04	3.49667	1094.54	771.013	72.4594	1092.01	818.657	-67.9123	1102.33	809.249	147.989	958.733	875.984	-133.354	963.662	865.432	11.6177	913.037	808.945	255.403	640.439	878.794	232.14	738.276	656.956	163.368	742.283	659.852	194.659	758.851	587.451	180.855	730.851	497.32	-244.321	659.364	868.592	-210.284	738.678	642.151	-147.788	746.149	662.433	-155.79	757.911	582.557	-136.897	732.295	496.09
6	0.05	3.48174	1094.49	771.13	72.4481	1091.99	818.682	-67.9226	1102.28	809.342	147.992	958.72	875.979	-133.383	963.669	865.402	11.5857	912.999	809.018	255.398	640.458	878.788	232.11	738.242	656.934	163.344	742.251	659.821	194.614	758.849	587.387	180.829	730.828	497.304	-244.362	659.359	868.565	-210.443	738.715	641.801	-147.853	746.251	662.631	-155.927	758.181	582.041	-136.866	732.477	495.711
7	0.06	3.46799	1094.49	771.175	72.4209	1092	818.676	-67.9598	1102.32	809.319	147.96	958.733	875.955	-133.423	963.701	865.393	11.5647	913.046	809.057	255.395	640.484	878.782	232.067	738.256	656.922	163.336	742.273	659.81	194.61	758.868	587.424	180.792	730.832	497.271	-244.381	659.325	868.496	-210.25	738.595	642.294	-148.03	746.558	663.074	-155.77	757.763	582.848	-136.97	732.17	496.256
8	0.07	3.45657	1094.52	771.177	72.4085	1092.03	818.688	-68.0033	1102.39	809.332	147.929	958.768	875.962	-133.426	963.74	865.426	11.5554	913.143	809.041	255.385	640.518	878.8	232.034	738.282	656.886	163.307	742.302	659.8	194.615	758.875	587.475	180.75	730.852	497.263	-244.423	659.39	868.567	-209.742	738.363	643.665	-148.043	746.553	662.996	-155.305	756.646	584.922	-137.166	731.361	497.702
9	0.08	3.46242	1094.55	771.157	72.4287	1092.04	818.689	-68.0122	1102.43	809.31	147.934	958.79	875.964	-133.423	963.766	865.443	11.5592	913.223	809	255.398	640.531	878.837	232.004	738.314	656.854	163.271	742.317	659.766	194.628	758.852	587.48	180.749	730.857	497.251	-244.418	659.428	868.578	-209.615	738.33	643.972	-147.95	746.328	662.583	-155.185	756.353	585.43	-137.215	731.17	498.027
10	0.09	3.49914	1094.63	771.07	72.4493	1092.07	818.678	-67.9885	1102.49	809.231	147.956	958.843	875.988	-133.409	963.785	865.438	11.5844	913.359	808.857	255.416	640.518	878.827	232.024	738.366	656.876	163.281	742.362	659.737	194.624	758.849	587.463	180.757	730.883	497.233	-244.403	659.466	868.551	-209.585	738.358	644.025	-147.938	746.28	662.466	-155.131	756.286	585.534	-137.22	731.168	498.079
11	0.1	3.53332	1094.69	771.015	72.481	1092.12	818.674	-67.9627	1102.55	809.234	147.975	958.884	876.014	-133.382	963.837	865.45	11.6121	913.5	808.712	255.437	640.494	878.802	232.05	738.426	656.887	163.284	742.446	659.704	194.645	758.875	587.476	180.779	730.928	497.254	-244.364	659.49	868.523	-209.568	738.407	644.064	-147.967	746.296	662.496	-155.097	756.303	585.544	-137.222	731.205	498.116
12	0.11	3.55337	1094.71	770.981	72.4843	1092.15	818.662	-67.9467	1102.57	809.253	147.993	958.891	876.02	-133.368	963.86	865.467	11.621	913.528	808.774	255.47	640.482	878.794	232.06	738.446	656.863	163.3	742.476	659.705	194.653	758.871	587.468	180.787	730.943	497.25	-244.042	659.308	867.994	-209.562	738.422	644.093	-147.968	746.295	662.503	-155.086	756.317	585.601	-137.206	731.22	498.155
13	0.12	3.57453	1094.71	770.975	72.4875	1092.13	818.677	-67.9357	1102.54	809.343	148.018	958.864	876.016	-133.362	963.85	865.484	11.6394	913.479	808.866	255.483	640.493	878.795	232.079	738.415	656.881	163.345	742.443	659.753	194.663	758.857	587.471	180.793	730.931	497.264	-243.658	659.034	867.299	-209.554	738.38	644.116	-147.94	746.266	662.513	-155.09	756.308	585.616	-137.193	731.175	498.176
14	0.13	3.56653	1094.65	771.037	72.5102	1092.08	818.718	-67.9449	1102.46	809.391	148.033	958.816	876.028	-133.354	963.83	865.499	11.6511	913.407	808.976	255.457	640.487	878.768	232.089	738.359	656.911	163.367	742.363	659.777	194.662	758.857	587.486	180.806	730.884	497.281	-244.263	659.393	868.26	-209.541	738.331	644.119	-147.908	746.346	662.657	-155.109	756.279	585.592	-137.192	731.114	498.181
15	0.14	3.52928	1094.55	771.161	72.4832	1092.03	818.707	-67.943	1102.37	809.422	148.024	958.782	876.041	-133.372	963.806	865.52	11.6409	913.292	809.113	255.427	640.475	878.768	232.078	738.296	656.896	163.35	742.309	659.792	194.648	758.864	587.464	180.77	730.839	497.234	-244.444	659.428	868.456	-209.551	738.278	644.127	-148.015	746.587	663.091	-155.118	756.233	585.616	-137.185	731.037	498.214
16	0.15	3.51404	1094.48	771.276	72.4441	1091.99	818.736	-67.9543	1102.33	809.459	147.996	958.763	876.012	-133.39	963.792	865.492	11.6209	913.228	809.157	255.445	640.495	878.784	232.054	738.266	656.891	163.326	742.271	659.823	194.616	758.869	587.453	180.751	730.822	497.245	-244.512	659.441	868.513	-209.8	738.374	643.519	-148.071	746.622	663.229	-155.34	756.731	584.711	-137.108	731.381	497.571
17	0.16	3.50728	1094.49	771.27	72.4455	1091.99	818.746	-67.9206	1102.35	809.449	147.983	958.789	876.007	-133.402	963.813	865.481	11.6176	913.24	809.21	255.447	640.504	878.782	232.037	738.265	656.912	163.308	742.247	659.86	194.615	758.878	587.505	180.755	730.833	497.272	-244.53	659.472	868.497	-210.336	738.633	642.141	-148.07	746.636	663.239	-155.839	757.908	582.602	-136.927	732.244	496.104
18	0.17	3.53074	1094.55	771.143	72.4768	1092.05	818.701	-67.8984	1102.41	809.404	147.996	958.827	876.016	-133.39	963.866	865.456	11.6344	913.36	809.136	255.434	640.521	878.788	232.041	738.315	656.91	163.306	742.283	659.831	194.638	758.878	587.518	180.777	730.87	497.257	-244.497	659.518	868.449	-210.222	738.628	642.383	-148.017	746.565	663.051	-155.727	757.721	582.976	-136.953	732.128	496.364
19	0.18	3.57488	1094.63	770.968	72.509	1092.08	818.625	-67.8777	1102.48	809.255	148.021	958.854	875.984	-133.364	963.896	865.388	11.6557	913.526	808.856	255.448	640.528	878.814	232.06	738.37	656.873	163.328	742.328	659.815	194.647	758.857	587.497	180.792	730.895	497.243	-244.461	659.594	868.484	-209.705	738.454	643.628	-147.918	746.333	662.61	-155.229	756.672	584.903	-137.101	731.413	497.673
20	0.19	3.61813	1094.68	770.859	72.5366	1092.1	818.599	-67.8711	1102.55	809.133	148.04	958.884	875.944	-133.34	963.921	865.319	11.6534	913.691	808.571	255.456	640.515	878.803	232.079	738.411	656.863	163.339	742.398	659.77	194.645	758.833	587.462	180.814	730.912	497.221	-244.49	659.721	868.612	-209.585	738.438	643.913	-147.883	746.299	662.415	-155.089	756.425	585.357	-137.125	731.271	497.944
21	0.2	3.61343	1094.68	770.852	72.548	1092.1	818.586	-67.8972	1102.56	809.113	148.029	958.901	875.929	-133.361	963.945	865.306	11.6458	913.716	808.495	255.433	640.503	878.772	232.078	738.428	656.863	163.317	742.422	659.745	194.62	758.831	587.383	180.815	730.915	497.229	-244.512	659.734	868.608	-209.574	738.431	643.978	-147.895	746.307	662.348	-155.071	756.352	585.486	-137.164	731.233	498.031
22	0.21	3.56043	1094.61	770.881	72.5134	1092.06	818.562	-67.9505	1102.5	809.145	147.986	958.886	875.891	-133.399	963.945	865.337	11.5927	913.67	808.491	255.435	640.511	878.76	232.021	738.404	656.833	163.255	742.404	659.705	194.584	758.834	587.36	180.778	730.892	497.212	-244.546	659.674	868.539	-209.592	738.398	644.016	-147.948	746.303	662.376	-155.095	756.281	585.533	-137.212	731.196	498.067
23	0.22	3.48626	1094.52	770.99	72.449	1092	818.556	-68.0144	1102.41	809.19	147.952	958.861	875.883	-133.413	963.925	865.351	11.5316	913.53	808.668	255.437	640.518	878.765	231.975	738.346	656.83	163.221	742.351	659.729	194.542	758.833	587.386	180.732	730.852	497.202	-244.593	659.622	868.516	-209.616	738.34	644.061	-148.021	746.386	662.616	-155.132	756.237	585.563	-137.255	731.131	498.121
24	0.23	3.45522	1094.44	771.075	72.4147	1091.95	818.582	-68.0297	1102.32	809.239	147.951	958.823	875.889	-133.437	963.909	865.36	11.5257	913.399	808.886	255.413	640.505	878.757	231.98	738.3	656.846	163.247	742.277	659.817	194.552	758.85	587.424	180.722	730.819	497.204	-244.619	659.523	868.392	-209.861	738.399	643.516	-148.125	746.604	663.073	-155.377	756.727	584.647	-137.171	731.448	497.523
25	0.24	3.46561	1094.39	771.101	72.4419	1091.94	818.596	-67.9834	1102.25	809.244	147.972	958.787	875.905	-133.427	963.901	865.358	11.5569	913.342	808.891	255.415	640.526	878.778	231.998	738.264	656.843	163.271	742.249	659.823	194.584	758.859	587.428	180.74	730.803	497.226	-244.65	659.5	868.359	-210.366	738.625	642.131	-148.132	746.629	663.159	-155.848	757.862	582.556	-136.955	732.252	496.084
26	0.25	3.51632	1094.42	771.006	72.4734	1091.94	818.523	-67.9143	1102.23	809.186	148.007	958.778	875.87	-133.387	963.917	865.34	11.6224	913.312	808.837	255.439	640.54	878.784	232.047	738.266	656.87	163.338	742.246	659.854	194.619	758.868	587.456	180.768	730.816	497.255	-244.68	659.603	868.438	-210.461	738.705	641.777	-148.034	746.524	662.999	-155.936	758.163	582.038	-136.832	732.471	495.714
27	0.26	3.57596	1094.48	770.908	72.5359	1091.98	818.468	-67.8639	1102.3	809.127	148.049	958.833	875.86	-133.353	963.978	865.311	11.6933	913.38	808.741	255.465	640.563	878.798	232.098	738.312	656.897	163.406	742.293	659.893	194.68	758.875	587.512	180.811	730.845	497.283	-244.682	659.725	868.468	-210.467	738.771	641.694	-147.898	746.302	662.605	-155.927	758.285	581.905	-136.76	732.589	495.608
28	0.27	3.61411	1094.54	770.771	72.5676	1092.03	818.435	-67.8681	1102.4	809.01	148.06	958.882	875.794	-133.34	964.032	865.245	11.695	913.532	808.498	255.485	640.564	878.779	232.12	738.368	656.888	163.402	742.37	659.836	194.696	758.862	587.526	180.825	730.888	497.271	-244.692	659.792	868.423	-210.237	738.715	642.244	-147.899	746.284	662.496	-155.69	757.838	582.794	-136.838	732.282	496.195
29	0.28	3.61854	1094.55	770.675	72.535	1092.05	818.37	-67.8954	1102.44	808.896	148.037	958.926	875.749	-133.35	964.055	865.171	11.6428	913.682	808.18	255.5	640.573	878.76	232.094	738.427	656.85	163.357	742.431	659.717	194.703	758.846	587.515	180.823	730.918	497.242	-244.73	659.843	868.434	-209.745	738.495	643.564	-147.921	746.328	662.411	-155.188	756.688	584.88	-137.059	731.476	497.605
30	0.29	3.58421	1094.52	770.684	72.4943	1092.02	818.33	-67.9224	1102.44	808.886	147.991	958.966	875.738	-133.372	964.055	865.146	11.5918	913.75	808.058	255.529	640.602	878.787	232.057	738.436	656.826	163.319	742.447	659.691	194.68	758.856	587.485	180.793	730.923	497.216	-244.751	659.806	868.41	-209.645	738.44	643.917	-147.943	746.352	662.432	-155.082	756.374	585.423	-137.13	731.283	497.994
31	0.3	3.51148	1094.45	770.749	72.45	1091.97	818.313	-67.9686	1102.38	808.912	147.951	958.968	875.692	-133.399	964.039	865.133	11.5183	913.744	808.066	255.545	640.611	878.768	232.024	738.403	656.817	163.281	742.422	659.685	194.669	758.853	587.464	180.748	730.883	497.184	-244.818	659.754	868.374	-209.631	738.387	644.018	-147.961	746.346	662.43	-155.092	756.264	585.547	-137.187	731.182	498.095
32	0.31	3.46995	1094.38	770.819	72.4214	1091.9	818.287	-68.022	1102.29	808.909	147.926	958.93	875.625	-133.437	964.028	865.132	11.4641	913.605	808.139	255.539	640.61	878.72	232.009	738.357	656.815	163.282	742.369	659.707	194.651	758.841	587.424	180.711	730.833	497.158	-244.877	659.761	868.361	-209.64	738.33	644.033	-148.029	746.415	662.597	-155.135	756.223	585.564	-137.209	731.096	498.111
33	0.32	3.44791	1094.31	770.908	72.4213	1091.86	818.29	-68.0463	1102.21	808.971	147.928	958.91	875.633	-133.462	964.028	865.167	11.483	913.46	808.362	255.537	640.648	878.729	232.015	738.314	656.831	163.283	742.316	659.778	194.616	758.868	587.417	180.701	730.807	497.194	-244.889	659.774	868.355	-209.867	738.423	643.457	-148.128	746.619	663.037	-155.371	756.736	584.662	-137.117	731.409	497.52
34	0.33	3.43538	1094.31	770.92	72.4246	1091.84	818.351	-68.0115	1102.18	808.998	147.953	958.904	875.68	-133.456	964.049	865.169	11.5252	913.413	808.511	255.569	640.696	878.762	232.035	738.297	656.862	163.3	742.296	659.845	194.567	758.882	587.423	180.726	730.808	497.246	-244.864	659.797	868.341	-210.392	738.697	642.088	-148.096	746.534	663	-155.839	757.895	582.568	-136.894	732.219	496.13
35	0.34	3.45736	1094.36	770.72	72.4594	1091.86	818.31	-67.9765	1102.19	808.925	147.965	958.913	875.679	-133.431	964.063	865.133	11.5799	913.446	808.439	255.562	640.72	878.74	232.066	738.317	656.834	163.325	742.329	659.816	194.566	758.876	587.396	180.763	730.839	497.24	-244.842	659.856	868.344	-210.501	738.767	641.698	-147.998	746.254	662.619	-155.923	758.178	581.998	-136.811	732.462	495.681
36	0.35	3.50437	1094.41	770.576	72.5102	1091.87	818.276	-67.9477	1102.22	808.853	147.979	958.939	875.693	-133.413	964.094	865.104	11.6294	913.515	808.283	255.56	640.721	878.75	232.083	738.362	656.794	163.371	742.352	659.806	194.584	758.855	587.387	180.791	730.859	497.208	-244.845	659.927	868.398	-210.504	738.784	641.586	-147.953	746.192	662.488	-155.921	758.263	581.844	-136.762	732.571	495.495
37	0.36	3.52103	1094.41	770.606	72.4939	1091.9	818.254	-67.9456	1102.28	808.824	147.985	958.993	875.742	-133.416	964.146	865.153	11.6278	913.609	808.183	255.576	640.735	878.787	232.085	738.401	656.819	163.38	742.382	659.83	194.595	758.868	587.408	180.795	730.877	497.221	-244.85	659.969	868.437	-210.265	738.702	642.199	-147.942	746.242	662.458	-155.704	757.799	582.739	-136.831	732.264	496.131
38	0.37	3.5086	1094.41	770.623	72.4689	1091.91	818.238	-67.9931	1102.34	808.78	147.951	959.05	875.73	-133.432	964.175	865.169	11.5573	913.759	807.942	255.6	640.751	878.801	232.055	738.441	656.809	163.315	742.442	659.708	194.621	758.867	587.426	180.767	730.888	497.241	-244.868	659.943	868.412	-209.758	738.492	643.537	-147.969	746.315	662.433	-155.214	756.661	584.816	-137.053	731.464	497.575
39	0.38	3.462	1094.4	770.593	72.4365	1091.9	818.21	-68.0459	1102.34	808.793	147.912	959.082	875.709	-133.465	964.174	865.112	11.463	913.858	807.719	255.609	640.753	878.768	232.018	738.452	656.777	163.262	742.484	659.649	194.638	758.854	587.438	180.726	730.886	497.201	-244.897	659.908	868.353	-209.67	738.445	643.871	-148.054	746.49	662.55	-155.094	756.354	585.335	-137.143	731.273	497.918
40	0.39	3.44084	1094.36	770.672	72.4184	1091.88	818.254	-68.0793	1102.31	808.816	147.886	959.089	875.723	-133.485	964.162	865.113	11.402	913.825	807.793	255.62	640.736	878.727	231.993	738.435	656.767	163.245	742.468	659.711	194.63	758.866	587.44	180.702	730.866	497.187	-244.913	659.83	868.284	-209.668	738.418	643.981	-148.177	746.78	662.948	-155.085	756.259	585.491	-137.192	731.186	498.077
41	0.4	3.42887	1094.32	770.811	72.401	1091.85	818.302	-68.0942	1102.27	808.897	147.869	959.054	875.748	-133.492	964.158	865.143	11.3835	913.726	807.916	255.629	640.738	878.719	231.987	738.398	656.792	163.259	742.409	659.754	194.632	758.875	587.463	180.704	730.829	497.218	-244.955	659.824	868.289	-209.646	738.389	644.035	-148.187	746.786	663.121	-155.107	756.235	585.586	-137.177	731.124	498.165
42	0.41	3.44101	1094.33	770.846	72.4156	1091.85	818.356	-68.045	1102.24	808.933	147.902	958.999	875.743	-133.476	964.15	865.151	11.4593	913.614	808.076	255.62	640.766	878.748	232.038	738.348	656.849	163.292	742.342	659.763	194.634	758.873	587.496	180.735	730.816	497.26	-244.965	659.868	868.308	-209.843	738.462	643.446	-148.11	746.615	663.019	-155.299	756.741	584.661	-137.045	731.438	497.536
43	0.42	3.49447	1094.39	770.784	72.4575	1091.88	818.383	-67.9663	1102.22	808.966	147.963	958.991	875.763	-133.439	964.153	865.135	11.576	913.529	808.283	255.623	640.774	878.746	232.114	738.339	656.918	163.359	742.342	659.797	194.643	758.884	587.492	180.786	730.839	497.289	-244.942	659.938	868.333	-210.353	738.737	642.05	-147.936	746.311	662.602	-155.744	757.887	582.522	-136.782	732.253	496.049
44	0.43	3.53101	1094.41	770.768	72.4833	1091.92	818.419	-67.9352	1102.23	809.023	147.994	959.006	875.758	-133.424	964.176	865.141	11.6428	913.549	808.299	255.617	640.79	878.757	232.147	738.355	656.905	163.414	742.345	659.843	194.647	758.893	587.472	180.817	730.86	497.307	-244.948	660.043	868.41	-210.473	738.83	641.726	-147.877	746.204	662.508	-155.85	758.175	581.997	-136.678	732.458	495.69
45	0.44	3.51111	1094.46	770.786	72.4635	1091.97	818.409	-67.9457	1102.3	809.013	147.979	959.036	875.731	-133.428	964.192	865.132	11.634	913.613	808.171	255.624	640.825	878.771	232.137	738.394	656.839	163.401	742.357	659.836	194.647	758.879	587.481	180.793	730.88	497.269	-244.93	660.061	868.382	-210.248	738.729	642.23	-147.897	746.222	662.447	-155.664	757.764	582.789	-136.747	732.169	496.233
46	0.45	3.47144	1094.48	770.802	72.4114	1092.02	818.347	-68.0043	1102.38	808.962	147.934	959.067	875.728	-133.433	964.198	865.095	11.5714	913.702	807.936	255.624	640.857	878.779	232.085	738.443	656.777	163.357	742.392	659.768	194.637	758.857	587.472	180.745	730.895	497.199	-244.904	659.993	868.27	-209.735	738.474	643.548	-147.949	746.284	662.426	-155.171	756.635	584.83	-136.995	731.367	497.631
47	0.46	3.39984	1094.46	770.868	72.3578	1092.04	818.332	-68.1077	1102.43	809.015	147.88	959.11	875.736	-133.465	964.213	865.121	11.458	913.78	807.738	255.633	640.849	878.749	232.028	738.461	656.752	163.266	742.444	659.66	194.628	758.867	587.461	180.701	730.9	497.173	-244.973	659.96	868.282	-209.669	738.432	643.855	-148.057	746.441	662.613	-155.071	756.313	585.338	-137.119	731.2	497.961
48	0.47	3.31835	1094.46	770.921	72.2918	1092.06	818.367	-68.187	1102.43	809.094	147.839	959.13	875.739	-133.509	964.223	865.19	11.3644	913.798	807.71	255.664	640.835	878.732	231.989	738.453	656.776	163.195	742.476	659.595	194.616	758.874	587.46	180.665	730.887	497.194	-245.024	659.922	868.293	-209.69	738.432	643.981	-148.209	746.742	663.019	-155.078	756.208	585.544	-137.191	731.172	498.073
49	0.48	3.28123	1094.49	770.896	72.2672	1092.06	818.404	-68.2182	1102.44	809.142	147.815	959.127	875.758	-133.523	964.212	865.198	11.3391	913.808	807.757	255.691	640.844	878.729	231.97	738.438	656.782	163.174	742.465	659.589	194.598	758.872	587.472	180.654	730.865	497.205	-245.039	659.894	868.264	-209.679	738.417	644.009	-148.248	746.814	663.122	-155.089	756.196	585.592	-137.196	731.169	498.093
50	0.49	3.29061	1094.48	770.982	72.2815	1092.06	818.424	-68.23	1102.47	809.169	147.834	959.087	875.817	-133.496	964.21	865.253	11.3787	913.743	807.908	255.701	640.852	878.755	232	738.424	656.785	163.231	742.394	659.688	194.582	758.878	587.439	180.675	730.849	497.21	-245.012	659.909	868.243	-209.88	738.496	643.405	-148.201	746.806	663.153	-155.303	756.733	584.618	-137.076	731.496	497.452
51	0.5	3.30075	1094.54	771.043	72.3229	1092.09	818.484	-68.1819	1102.5	809.197	147.883	959.038	875.82	-133.471	964.232	865.304	11.4718	913.655	808.076	255.715	640.875	878.775	232.055	738.409	656.783	163.314	742.352	659.79	194.556	758.889	587.394	180.72	730.846	497.216	-244.996	660.006	868.338	-210.373	738.738	642.061	-148.116	746.644	663.021	-155.763	757.913	582.505	-136.82	732.307	496.022
52	0.51	3.32113	1094.62	771.006	72.3648	1092.14	818.476	-68.1071	1102.53	809.234	147.932	959.039	875.779	-133.454	964.244	865.291	11.5357	913.612	808.094	255.716	640.869	878.753	232.103	738.411	656.799	163.357	742.374	659.797	194.568	758.889	587.385	180.764	730.883	497.227	-244.966	660.079	868.393	-210.476	738.842	641.715	-147.989	746.332	662.597	-155.854	758.22	581.974	-136.706	732.503	495.674
53	0.52	3.34798	1094.69	770.941	72.3936	1092.18	818.48	-68.0705	1102.58	809.226	147.949	959.065	875.755	-133.449	964.259	865.269	11.5653	913.581	808.021	255.695	640.87	878.742	232.127	738.414	656.823	163.391	742.382	659.772	194.576	758.867	587.357	180.77	730.899	497.212	-244.935	660.108	868.39	-210.482	738.878	641.572	-147.926	746.229	662.448	-155.857	758.308	581.8	-136.659	732.549	495.531
54	0.53	3.33806	1094.7	771.037	72.3735	1092.19	818.498	-68.1171	1102.62	809.225	147.915	959.058	875.739	-133.463	964.25	865.257	11.5502	913.591	807.929	255.676	640.874	878.756	232.099	738.417	656.823	163.388	742.378	659.764	194.581	758.841	587.373	180.751	730.886	497.214	-244.955	660.091	868.403	-210.258	738.751	642.167	-147.908	746.219	662.392	-155.671	757.79	582.686	-136.763	732.182	496.144
55	0.54	3.28767	1094.7	771.17	72.308	1092.21	818.477	-68.1986	1102.63	809.302	147.872	959.078	875.733	-133.499	964.229	865.298	11.4604	913.602	807.914	255.687	640.874	878.755	232.045	738.433	656.811	163.339	742.387	659.724	194.584	758.854	587.393	180.713	730.875	497.208	-244.992	660.009	868.379	-209.767	738.472	643.552	-147.982	746.396	662.529	-155.222	756.605	584.838	-137.029	731.346	497.636
56	0.55	3.22895	1094.7	771.236	72.2507	1092.21	818.469	-68.2473	1102.65	809.348	147.819	959.105	875.697	-133.538	964.213	865.339	11.375	913.641	807.844	255.724	640.863	878.746	232	738.445	656.772	163.262	742.41	659.649	194.604	758.86	587.446	180.672	730.849	497.181	-245.006	659.913	868.296	-209.681	738.407	643.896	-148.154	746.72	662.97	-155.115	756.293	585.386	-137.146	731.148	498.022
57	0.56	3.20133	1094.75	771.234	72.2218	1092.23	818.483	-68.2681	1102.67	809.406	147.8	959.114	875.704	-133.541	964.194	865.325	11.3301	913.655	807.806	255.75	640.858	878.71	231.971	738.447	656.761	163.216	742.43	659.655	194.616	758.863	587.495	180.656	730.843	497.189	-245.019	659.898	868.287	-209.684	738.416	643.978	-148.228	746.793	663.14	-155.11	756.216	585.546	-137.195	731.127	498.12
58	0.57	3.21489	1094.79	771.269	72.2534	1092.26	818.555	-68.2533	1102.72	809.423	147.82	959.118	875.744	-133.511	964.196	865.353	11.358	913.658	807.817	255.764	640.863	878.724	231.998	738.45	656.819	163.239	742.442	659.726	194.632	758.879	587.522	180.661	730.844	497.232	-245.002	659.926	868.309	-209.669	738.43	644.021	-148.157	746.701	663.006	-155.08	756.201	585.567	-137.181	731.13	498.162
59	0.58	3.29036	1094.85	771.286	72.3195	1092.31	818.615	-68.1838	1102.78	809.385	147.877	959.112	875.747	-133.456	964.203	865.369	11.4509	913.615	807.873	255.781	640.871	878.747	232.071	738.463	656.838	163.342	742.428	659.793	194.675	758.876	587.557	180.705	730.877	497.261	-244.955	659.971	868.326	-209.596	738.429	644.051	-147.981	746.431	662.614	-155.025	756.238	585.57	-137.103	731.142	498.16
60	0.59	3.35361	1094.91	771.188	72.3928	1092.36	818.605	-68.1207	1102.81	809.33	147.942	959.098	875.757	-133.419	964.198	865.349	11.5449	913.554	807.809	255.78	640.866	878.726	232.128	738.461	656.835	163.433	742.43	659.785	194.69	758.856	587.52	180.756	730.902	497.248	-244.903	660.027	868.381	-209.771	738.539	643.43	-147.889	746.325	662.451	-155.207	756.782	584.611	-136.926	731.509	497.463
61	0.6	3.35191	1094.94	771.202	72.4043	1092.37	818.623	-68.1198	1102.78	809.337	147.951	959.064	875.779	-133.425	964.172	865.314	11.6014	913.437	807.909	255.757	640.891	878.729	232.144	738.44	656.828	163.448	742.407	659.798	194.672	758.853	587.457	180.771	730.904	497.268	-244.885	660.048	868.41	-210.302	738.787	642.063	-147.871	746.266	662.391	-155.702	757.934	582.466	-136.703	732.349	495.971
62	0.61	3.29951	1094.92	771.267	72.3438	1092.36	818.606	-68.1718	1102.76	809.402	147.913	959.031	875.802	-133.467	964.133	865.366	11.556	913.337	808.069	255.758	640.894	878.764	232.111	738.418	656.799	163.413	742.391	659.829	194.648	758.875	587.466	180.728	730.903	497.256	-244.902	660.018	868.438	-210.474	738.84	641.753	-147.926	746.24	662.455	-155.849	758.198	581.997	-136.707	732.53	495.68
63	0.62	3.22379	1094.86	771.338	72.2665	1092.31	818.6	-68.2621	1102.72	809.466	147.863	958.984	875.769	-133.51	964.1	865.426	11.4824	913.254	808.115	255.772	640.87	878.741	232.049	738.399	656.758	163.352	742.371	659.78	194.61	758.882	587.457	180.684	730.872	497.236	-244.924	659.895	868.364	-210.292	738.701	642.28	-148.015	746.352	662.681	-155.712	757.719	582.855	-136.833	732.151	496.278
64	0.63	3.15905	1094.78	771.47	72.2046	1092.25	818.62	-68.3089	1102.66	809.504	147.827	958.941	875.758	-133.535	964.056	865.411	11.4183	913.163	808.152	255.789	640.81	878.691	232.003	738.347	656.746	163.313	742.335	659.735	194.6	758.847	587.441	180.655	730.821	497.212	-244.929	659.776	868.281	-209.796	738.385	643.62	-148.152	746.598	663.061	-155.267	756.535	584.901	-137.072	731.297	497.695
65	0.64	3.13571	1094.76	771.559	72.1691	1092.26	818.621	-68.3269	1102.65	809.474	147.807	958.94	875.791	-133.54	964.014	865.414	11.3822	913.144	808.129	255.816	640.775	878.684	231.991	738.327	656.76	163.292	742.342	659.724	194.595	758.851	587.404	180.631	730.812	497.227	-244.957	659.76	868.321	-209.694	738.327	643.97	-148.219	746.678	663.158	-155.161	756.231	585.436	-137.137	731.093	498.043
66	0.65	3.13109	1094.81	771.5	72.169	1092.3	818.607	-68.3366	1102.68	809.453	147.81	958.967	875.799	-133.535	964.012	865.421	11.3687	913.205	807.991	255.835	640.772	878.695	232.016	738.378	656.773	163.266	742.399	659.688	194.592	758.848	587.438	180.634	730.828	497.225	-244.947	659.771	868.349	-209.671	738.344	644.024	-148.216	746.736	663.201	-155.12	756.189	585.554	-137.144	731.094	498.126
67	0.66	3.13281	1094.9	771.318	72.1834	1092.39	818.547	-68.3297	1102.74	809.422	147.827	958.995	875.77	-133.517	964.025	865.391	11.4	913.281	807.778	255.854	640.758	878.682	232.04	738.439	656.76	163.281	742.451	659.659	194.598	758.845	587.451	180.662	730.865	497.218	-244.912	659.843	868.409	-209.647	738.387	643.992	-148.155	746.667	662.996	-155.095	756.227	585.55	-137.157	731.138	498.122
68	0.67	3.16819	1095	771.186	72.2165	1092.45	818.543	-68.306	1102.8	809.353	147.851	959.022	875.771	-133.491	964.065	865.371	11.4589	913.302	807.689	255.841	640.747	878.667	232.073	738.492	656.777	163.326	742.487	659.674	194.613	758.88	587.43	180.702	730.928	497.25	-244.866	659.899	868.458	-209.615	738.44	644.016	-148.037	746.43	662.58	-155.068	756.28	585.539	-137.121	731.191	498.09
69	0.68	3.20408	1095.02	771.155	72.2573	1092.46	818.57	-68.2728	1102.81	809.326	147.888	959.022	875.769	-133.461	964.079	865.367	11.5324	913.221	807.713	255.809	640.784	878.697	232.126	738.502	656.829	163.386	742.484	659.714	194.653	758.899	587.474	180.718	730.947	497.284	-244.815	659.91	868.419	-209.585	738.451	644.038	-147.964	746.353	662.486	-155.032	756.322	585.55	-137.074	731.178	498.086
70	0.69	3.21396	1094.97	771.172	72.2624	1092.44	818.575	-68.2619	1102.78	809.335	147.904	958.979	875.769	-133.442	964.018	865.313	11.5874	913.067	807.834	255.789	640.788	878.729	232.132	738.456	656.823	163.41	742.446	659.757	194.684	758.88	587.492	180.714	730.921	497.256	-244.831	659.9	868.444	-209.79	738.524	643.409	-147.907	746.295	662.408	-155.228	756.815	584.599	-136.958	731.513	497.442
71	0.7	3.179	1094.87	771.293	72.2292	1092.39	818.573	-68.2882	1102.71	809.402	147.903	958.911	875.786	-133.463	963.957	865.322	11.5795	912.901	807.95	255.781	640.756	878.697	232.122	738.378	656.818	163.417	742.377	659.777	194.7	758.853	587.497	180.703	730.877	497.257	-244.847	659.801	868.366	-210.327	738.734	642.046	-147.867	746.255	662.354	-155.734	757.914	582.5	-136.747	732.312	495.993
72	0.71	3.14124	1094.78	771.496	72.187	1092.33	818.611	-68.3371	1102.64	809.464	147.885	958.866	875.83	-133.472	963.903	865.349	11.5339	912.753	808.073	255.788	640.74	878.68	232.11	738.328	656.829	163.395	742.327	659.808	194.68	758.861	587.481	180.671	730.841	497.267	-244.878	659.696	868.333	-210.486	738.748	641.746	-147.934	746.35	662.599	-155.888	758.168	582.033	-136.733	732.47	495.711
73	0.72	3.1088	1094.74	771.569	72.1498	1092.32	818.604	-68.3716	1102.61	809.487	147.848	958.851	875.826	-133.482	963.851	865.327	11.5026	912.675	808.09	255.801	640.722	878.696	232.084	738.319	656.841	163.366	742.314	659.826	194.673	758.866	587.519	180.643	730.813	497.264	-244.911	659.617	868.33	-210.306	738.626	642.305	-148.103	746.599	663.084	-155.733	757.705	582.884	-136.83	732.122	496.307
74	0.73	3.11044	1094.78	771.497	72.131	1092.37	818.573	-68.3891	1102.61	809.481	147.852	958.868	875.822	-133.478	963.829	865.292	11.4902	912.674	807.954	255.825	640.699	878.678	232.072	738.339	656.836	163.361	742.337	659.809	194.688	758.855	587.569	180.643	730.817	497.282	-244.901	659.601	868.344	-209.766	738.385	643.64	-148.145	746.686	663.17	-155.252	756.556	584.934	-137.018	731.318	497.694
75	0.74	3.12288	1094.9	771.265	72.1583	1092.44	818.523	-68.3823	1102.66	809.414	147.882	958.903	875.798	-133.452	963.839	865.261	11.5246	912.696	807.826	255.838	640.679	878.674	232.094	738.386	656.815	163.391	742.39	659.796	194.686	758.867	587.531	180.657	730.86	497.295	-244.878	659.647	868.383	-209.63	738.37	643.955	-148.118	746.639	663.006	-155.105	756.304	585.401	-137.064	731.159	497.982
76	0.75	3.12696	1094.98	771.117	72.1573	1092.5	818.463	-68.3547	1102.71	809.316	147.905	958.932	875.747	-133.434	963.855	865.222	11.5734	912.724	807.636	255.848	640.673	878.674	232.108	738.435	656.817	163.384	742.455	659.724	194.661	758.868	587.467	180.682	730.905	497.267	-244.839	659.693	868.419	-209.6	738.4	644.005	-148.011	746.412	662.556	-155.05	756.276	585.468	-137.072	731.163	498.06
77	0.76	3.11502	1095.03	771.023	72.1474	1092.53	818.427	-68.3517	1102.74	809.257	147.887	958.921	875.718	-133.434	963.851	865.192	11.5811	912.712	807.538	255.861	640.678	878.695	232.105	738.452	656.814	163.366	742.479	659.716	194.642	758.865	587.451	180.675	730.947	497.252	-244.808	659.705	868.437	-209.579	738.406	644.055	-147.991	746.335	662.438	-155.05	756.281	585.519	-137.068	731.185	498.058
78	0.77	3.09726	1094.99	771.068	72.1294	1092.52	818.415	-68.3652	1102.73	809.254	147.864	958.908	875.715	-133.452	963.825	865.168	11.566	912.635	807.579	255.86	640.709	878.724	232.097	738.444	656.816	163.353	742.451	659.746	194.615	758.879	587.47	180.651	730.95	497.251	-244.809	659.695	868.439	-209.589	738.394	644.084	-147.991	746.301	662.451	-155.071	756.296	585.533	-137.076	731.172	498.07
79	0.78	3.07646	1094.92	771.128	72.1063	1092.48	818.416	-68.3916	1102.69	809.271	147.855	958.883	875.714	-133.46	963.78	865.138	11.5552	912.495	807.69	255.845	640.712	878.68	232.082	738.415	656.786	163.361	742.404	659.796	194.57	758.89	587.455	180.613	730.932	497.239	-244.814	659.642	868.416	-209.611	738.378	644.071	-148.036	746.401	662.658	-155.097	756.279	585.536	-137.095	731.121	498.123
80	0.79	3.05707	1094.82	771.231	72.0849	1092.42	818.426	-68.4245	1102.63	809.278	147.865	958.832	875.69	-133.475	963.72	865.148	11.5506	912.338	807.741	255.837	640.701	878.657	232.076	738.36	656.767	163.368	742.352	659.808	194.581	758.879	587.411	180.594	730.89	497.198	-244.83	659.581	868.38	-209.614	738.338	644.064	-148.115	746.651	663.064	-155.113	756.248	585.552	-137.105	731.054	498.138
81	0.8	3.05297	1094.75	771.279	72.0785	1092.37	818.422	-68.4347	1102.58	809.264	147.872	958.792	875.677	-133.462	963.649	865.133	11.5504	912.226	807.688	255.856	640.689	878.659	232.07	738.31	656.782	163.386	742.321	659.798	194.618	758.865	587.408	180.589	730.843	497.193	-244.822	659.501	868.335	-209.847	738.399	643.439	-148.144	746.675	663.186	-155.322	756.725	584.593	-137.006	731.384	497.496
82	0.81	3.05109	1094.74	771.194	72.0964	1092.37	818.385	-68.4309	1102.56	809.199	147.872	958.776	875.649	-133.446	963.612	865.086	11.5714	912.181	807.585	255.891	640.656	878.637	232.091	738.301	656.822	163.398	742.327	659.779	194.627	758.86	587.405	180.611	730.824	497.232	-244.806	659.458	868.318	-210.373	738.647	642.034	-148.139	746.67	663.173	-155.788	757.869	582.487	-136.825	732.246	496.048
83	0.82	3.06327	1094.76	771.14	72.0953	1092.39	818.327	-68.4253	1102.57	809.163	147.874	958.784	875.618	-133.437	963.634	865.116	11.5888	912.175	807.549	255.934	640.62	878.614	232.112	738.331	656.811	163.4	742.365	659.779	194.64	758.868	587.452	180.625	730.836	497.275	-244.793	659.455	868.346	-210.283	738.621	642.336	-148.086	746.581	662.974	-155.687	757.667	582.893	-136.883	732.123	496.322
84	0.83	3.08595	1094.82	771.022	72.125	1092.43	818.311	-68.4099	1102.62	809.121	147.883	958.813	875.624	-133.41	963.648	865.114	11.611	912.183	807.514	255.962	640.606	878.6	232.135	738.383	656.847	163.407	742.405	659.78	194.653	758.877	587.504	180.645	730.88	497.312	-244.765	659.491	868.402	-209.776	738.423	643.65	-147.986	746.346	662.581	-155.236	756.598	584.889	-137.054	731.361	497.694
85	0.84	3.13323	1094.85	770.95	72.1563	1092.45	818.305	-68.3863	1102.64	809.048	147.915	958.829	875.615	-133.379	963.643	865.086	11.6553	912.185	807.405	255.97	640.601	878.602	232.161	738.413	656.835	163.436	742.439	659.785	194.703	758.893	587.587	180.66	730.914	497.334	-244.726	659.544	868.472	-209.61	738.377	643.983	-147.937	746.294	662.497	-155.087	756.362	585.406	-137.06	731.183	498.069
86	0.85	3.15337	1094.82	770.886	72.1831	1092.42	818.305	-68.3644	1102.62	809.005	147.942	958.838	875.588	-133.359	963.645	865.089	11.6734	912.13	807.381	255.961	640.612	878.628	232.182	738.413	656.814	163.465	742.438	659.76	194.745	758.881	587.569	180.679	730.918	497.325	-244.694	659.553	868.502	-209.533	738.372	644.048	-147.883	746.296	662.415	-155.021	756.301	585.524	-137.046	731.151	498.14
87	0.86	3.12064	1094.76	770.857	72.1863	1092.37	818.271	-68.3671	1102.59	808.99	147.93	958.805	875.533	-133.38	963.615	865.073	11.6676	912.066	807.382	255.939	640.614	878.626	232.16	738.41	656.826	163.469	742.42	659.743	194.723	758.851	587.522	180.665	730.904	497.284	-244.714	659.515	868.518	-209.544	738.365	644.049	-147.851	746.298	662.355	-155.03	756.264	585.535	-137.059	731.142	498.126
88	0.87	3.06475	1094.73	770.822	72.1691	1092.34	818.234	-68.3975	1102.56	808.986	147.889	958.782	875.51	-133.416	963.594	865.059	11.6391	912.003	807.377	255.903	640.621	878.626	232.123	738.413	656.822	163.422	742.418	659.726	194.711	758.851	587.548	180.624	730.902	497.278	-244.723	659.426	868.438	-209.573	738.361	644.055	-147.923	746.438	662.521	-155.049	756.25	585.55	-137.079	731.137	498.118
89	0.88	3.03919	1094.69	770.831	72.1189	1092.32	818.175	-68.4268	1102.53	808.987	147.856	958.772	875.492	-133.43	963.579	865.071	11.5938	911.925	807.423	255.889	640.634	878.649	232.087	738.406	656.799	163.377	742.4	659.745	194.701	758.858	587.585	180.586	730.894	497.276	-244.71	659.373	868.354	-209.589	738.351	644.063	-148.079	746.697	662.961	-155.069	756.238	585.58	-137.109	731.145	498.123
90	0.89	3.02862	1094.64	770.881	72.0727	1092.29	818.147	-68.4329	1102.49	808.996	147.848	958.755	875.496	-133.439	963.556	865.069	11.5596	911.847	807.466	255.897	640.635	878.641	232.075	738.376	656.789	163.362	742.379	659.781	194.69	758.851	587.581	180.578	730.888	497.276	-244.721	659.355	868.365	-209.601	738.338	644.079	-148.095	746.626	662.962	-155.09	756.233	585.611	-137.136	731.141	498.144
91	0.9	3.05283	1094.61	770.91	72.0689	1092.24	818.146	-68.4228	1102.47	808.957	147.87	958.724	875.503	-133.418	963.499	865.047	11.5592	911.801	807.466	255.9	640.593	878.602	232.104	738.33	656.817	163.385	742.358	659.804	194.665	758.853	587.526	180.608	730.867	497.277	-244.724	659.326	868.362	-209.835	738.424	643.471	-147.97	746.331	662.551	-155.309	756.733	584.681	-137.05	731.477	497.533
92	0.91	3.10642	1094.6	770.809	72.107	1092.22	818.084	-68.3738	1102.45	808.884	147.92	958.692	875.508	-133.373	963.448	865.025	11.5986	911.776	807.376	255.913	640.547	878.599	232.148	738.295	656.858	163.421	742.354	659.803	194.639	758.834	587.469	180.646	730.853	497.301	-244.686	659.35	868.379	-210.332	738.651	642.06	-147.913	746.179	662.453	-155.771	757.868	582.535	-136.81	732.294	496.072
93	0.92	3.12572	1094.6	770.76	72.1355	1092.24	818.06	-68.3339	1102.43	808.857	147.959	958.66	875.527	-133.345	963.425	865.017	11.6225	911.785	807.314	255.93	640.527	878.641	232.196	738.299	656.902	163.447	742.372	659.828	194.628	758.833	587.439	180.673	730.854	497.336	-244.675	659.399	868.465	-210.453	738.707	641.727	-147.912	746.122	662.474	-155.869	758.169	582	-136.728	732.5	495.698
94	0.93	3.11582	1094.63	770.73	72.1379	1092.27	818.066	-68.3586	1102.46	808.844	147.944	958.675	875.544	-133.35	963.449	865.033	11.6166	911.776	807.332	255.916	640.486	878.593	232.207	738.314	656.927	163.433	742.41	659.811	194.61	758.859	587.429	180.67	730.867	497.351	-244.714	659.417	868.508	-210.267	738.628	642.304	-147.943	746.152	662.478	-155.708	757.768	582.843	-136.823	732.198	496.249
95	0.94	3.10698	1094.61	770.692	72.1326	1092.26	818.061	-68.3826	1102.48	808.791	147.902	958.688	875.5	-133.371	963.457	865.024	11.6009	911.745	807.352	255.881	640.458	878.546	232.16	738.343	656.868	163.397	742.409	659.749	194.599	758.861	587.418	180.645	730.869	497.324	-244.737	659.393	868.487	-209.761	738.376	643.613	-148.006	746.319	662.634	-155.265	756.622	584.882	-137.029	731.371	497.659
96	0.95	3.08366	1094.57	770.637	72.1132	1092.23	818.014	-68.3895	1102.48	808.719	147.853	958.68	875.428	-133.405	963.437	864.978	11.5572	911.704	807.345	255.849	640.496	878.587	232.109	738.36	656.808	163.38	742.402	659.717	194.605	758.845	587.392	180.601	730.872	497.286	-244.741	659.324	868.386	-209.652	738.32	643.916	-148.116	746.629	662.969	-155.139	756.319	585.358	-137.098	731.178	497.993
97	0.96	3.03091	1094.55	770.612	72.0701	1092.21	818.002	-68.4133	1102.48	808.726	147.807	958.678	875.425	-133.445	963.434	864.999	11.5175	911.628	807.369	255.811	640.532	878.647	232.048	738.365	656.792	163.322	742.416	659.692	194.622	758.852	587.394	180.551	730.869	497.271	-244.759	659.277	868.395	-209.649	738.309	644.003	-148.179	746.716	663.077	-155.137	756.235	585.522	-137.167	731.141	498.106
98	0.97	3.02086	1094.55	770.594	72.0681	1092.2	818.031	-68.423	1102.49	808.709	147.789	958.678	875.442	-133.458	963.411	865.006	11.5023	911.575	807.404	255.777	640.547	878.679	232.032	738.356	656.781	163.293	742.42	659.686	194.631	758.859	587.414	180.527	730.872	497.251	-244.763	659.269	868.386	-209.656	738.312	644.005	-148.213	746.752	663.142	-155.138	756.223	585.573	-137.192	731.139	498.114
99	0.98	3.08722	1094.55	770.585	72.1002	1092.19	818.045	-68.3816	1102.51	808.654	147.81	958.655	875.44	-133.435	963.397	864.988	11.547	911.564	807.365	255.756	640.534	878.676	232.054	738.343	656.768	163.335	742.4	659.712	194.656	758.846	587.484	180.555	730.888	497.245	-244.76	659.318	868.393	-209.618	738.325	644.018	-148.131	746.623	662.982	-155.098	756.233	585.573	-137.15	731.133	498.094
100	0.99	3.14975	1094.6	770.545	72.1483	1092.23	818.047	-68.33	1102.54	808.636	147.856	958.648	875.484	-133.384	963.403	864.987	11.5928	911.571	807.374	255.773	640.528	878.686	232.117	738.349	656.826	163.412	742.386	659.834	194.688	758.863	587.548	180.6	730.918	497.287	-244.758	659.38	868.456	-209.806	738.442	643.446	-147.969	746.338	662.621	-155.284	756.782	584.636	-137.01	731.539	497.446
101	1	3.19112	1094.66	770.52	72.1972	1092.27	818.055	-68.2809	1102.57	808.605	147.904	958.646	875.529	-133.339	963.378	864.981	11.6281	911.6	807.3	255.789	640.478	878.647	232.186	738.347	656.878	163.476	742.415	659.89	194.727	758.872	587.569	180.661	730.935	497.358	-244.742	659.423	868.524	-210.317	738.707	642.129	-147.899	746.23	662.513	-155.773	757.95	582.552	-136.784	732.407	495.995
102	1.01	3.23975	1094.67	770.468	72.2425	1092.26	818.032	-68.2691	1102.57	808.554	147.956	958.615	875.523	-133.31	963.347	864.934	11.6683	911.596	807.221	255.79	640.402	878.569	232.235	738.329	656.894	163.508	742.426	659.839	194.759	758.848	587.549	180.71	730.911	497.351	-244.73	659.411	868.525	-210.199	738.644	642.374	-147.869	746.178	662.44	-155.651	757.716	582.929	-136.783	732.196	496.279
103	1.02	3.24954	1094.65	770.504	72.2578	1092.26	818.025	-68.2778	1102.56	808.537	147.962	958.592	875.525	-133.299	963.312	864.965	11.6714	911.567	807.196	255.792	640.353	878.552	232.257	738.298	656.925	163.533	742.403	659.863	194.769	758.836	587.542	180.727	730.878	497.355	-244.732	659.324	868.474	-209.7	738.371	643.666	-147.854	746.151	662.45	-155.19	756.625	584.901	-136.976	731.338	497.712
104	1.03	3.18643	1094.63	770.619	72.2104	1092.26	818.044	-68.3346	1102.54	808.612	147.93	958.59	875.56	-133.337	963.302	865.021	11.6239	911.458	807.349	255.796	640.351	878.58	232.204	738.282	656.935	163.497	742.384	659.902	194.78	758.867	587.621	180.684	730.854	497.375	-244.76	659.236	868.45	-209.607	738.301	644.024	-147.931	746.302	662.672	-155.116	756.341	585.453	-137.07	731.131	498.093
105	1.04	3.11385	1094.61	770.603	72.1284	1092.22	818.058	-68.4056	1102.53	808.677	147.871	958.592	875.539	-133.389	963.296	865.025	11.5472	911.363	807.429	255.784	640.402	878.636	232.127	738.273	656.881	163.421	742.357	659.866	194.754	758.88	587.638	180.616	730.834	497.356	-244.782	659.195	868.456	-209.626	738.288	644.102	-148.101	746.606	663.093	-155.109	756.235	585.597	-137.138	731.091	498.185
106	1.05	3.07984	1094.61	770.51	72.0735	1092.22	818.011	-68.4382	1102.54	808.604	147.827	958.595	875.484	-133.414	963.283	864.975	11.5073	911.342	807.378	255.743	640.432	878.653	232.069	738.303	656.807	163.353	742.364	659.801	194.713	758.873	587.562	180.569	730.841	497.306	-244.742	659.137	868.367	-209.635	738.276	644.091	-148.15	746.685	663.148	-155.109	756.205	585.592	-137.177	731.094	498.167
107	1.06	3.04111	1094.65	770.485	72.0664	1092.26	817.969	-68.4608	1102.57	808.574	147.807	958.605	875.467	-133.426	963.289	864.954	11.4962	911.339	807.303	255.719	640.455	878.676	232.036	738.318	656.781	163.339	742.377	659.791	194.705	758.853	587.533	180.541	730.868	497.268	-244.714	659.166	868.421	-209.633	738.29	644.089	-148.163	746.697	663.143	-155.107	756.225	585.582	-137.19	731.116	498.162
108	1.07	3.02542	1094.73	770.438	72.061	1092.34	817.929	-68.4689	1102.63	808.549	147.801	958.598	875.464	-133.433	963.301	864.969	11.5086	911.314	807.235	255.707	640.476	878.7	232.028	738.322	656.793	163.363	742.377	659.805	194.664	758.848	587.493	180.536	730.89	497.264	-244.677	659.201	868.44	-209.611	738.311	644.091	-148.157	746.72	663.157	-155.108	756.259	585.571	-137.17	731.134	498.142
109	1.08	3.04805	1094.79	770.369	72.0797	1092.4	817.916	-68.4327	1102.66	808.522	147.825	958.582	875.441	-133.412	963.28	864.96	11.5488	911.296	807.147	255.712	640.475	878.69	232.083	738.32	656.844	163.379	742.369	659.797	194.622	758.824	587.451	180.572	730.897	497.288	-244.653	659.277	868.456	-209.582	738.314	644.062	-148.091	746.603	662.966	-155.106	756.276	585.524	-137.136	731.13	498.123
110	1.09	3.07658	1094.86	770.363	72.0917	1092.42	817.884	-68.4166	1102.69	808.511	147.854	958.562	875.411	-133.373	963.244	864.953	11.5901	911.286	807.125	255.748	640.445	878.651	232.151	738.315	656.85	163.412	742.363	659.799	194.623	758.829	587.445	180.608	730.898	497.301	-244.661	659.333	868.526	-209.801	738.427	643.452	-148	746.278	662.616	-155.298	756.791	584.575	-137.017	731.518	497.447
111	1.1	3.03958	1094.89	770.424	72.0659	1092.45	817.84	-68.4402	1102.7	808.566	147.858	958.55	875.403	-133.369	963.204	864.949	11.5901	911.242	807.166	255.792	640.399	878.587	232.164	738.304	656.869	163.433	742.364	659.839	194.608	758.858	587.422	180.618	730.89	497.302	-244.67	659.315	868.592	-210.326	738.67	642.128	-147.981	746.169	662.581	-155.807	757.936	582.545	-136.829	732.356	496.008
112	1.11	3.01507	1094.88	770.486	72.0505	1092.47	817.817	-68.4864	1102.69	808.599	147.863	958.537	875.403	-133.363	963.161	864.924	11.5748	911.2	807.18	255.825	640.341	878.55	232.168	738.284	656.9	163.438	742.362	659.848	194.616	758.859	587.427	180.625	730.867	497.327	-244.671	659.217	868.586	-210.234	738.584	642.41	-147.983	746.265	662.688	-155.735	757.694	582.98	-136.892	732.156	496.318
113	1.12	3.01183	1094.89	770.476	72.0587	1092.48	817.827	-68.5215	1102.67	808.595	147.861	958.51	875.367	-133.37	963.121	864.894	11.5608	911.168	807.158	255.839	640.295	878.525	232.162	738.278	656.89	163.434	742.369	659.803	194.642	758.855	587.416	180.628	730.848	497.302	-244.692	659.137	868.566	-209.762	738.32	643.673	-148.057	746.554	663.034	-155.275	756.574	584.932	-137.094	731.332	497.708
114	1.13	2.95999	1094.94	770.499	72.0469	1092.51	817.817	-68.5597	1102.65	808.656	147.846	958.511	875.353	-133.398	963.106	864.907	11.5324	911.129	807.163	255.843	640.299	878.525	232.139	738.282	656.882	163.414	742.364	659.797	194.681	758.875	587.461	180.611	730.826	497.275	-244.707	659.066	868.55	-209.65	738.255	644.03	-148.104	746.613	663.151	-155.155	756.261	585.461	-137.152	731.124	498.052
115	1.14	2.92932	1094.97	770.524	72.0273	1092.52	817.863	-68.5859	1102.66	808.724	147.825	958.542	875.355	-133.412	963.119	864.951	11.5039	911.099	807.189	255.842	640.363	878.558	232.108	738.306	656.867	163.374	742.373	659.794	194.719	758.885	587.533	180.589	730.835	497.309	-244.698	659.022	868.55	-209.627	738.272	644.125	-148.143	746.651	663.251	-155.137	756.222	585.606	-137.178	731.107	498.161
116	1.15	2.95339	1095.01	770.522	72.013	1092.56	817.851	-68.5536	1102.71	808.66	147.796	958.575	875.335	-133.424	963.135	864.952	11.5068	911.111	807.112	255.841	640.446	878.607	232.087	738.353	656.825	163.364	742.412	659.759	194.739	758.888	587.59	180.58	730.879	497.32	-244.647	659.006	868.493	-209.605	738.312	644.117	-148.093	746.58	663.082	-155.124	756.237	585.636	-137.172	731.14	498.181
117	1.16	2.98919	1095.07	770.448	72.0301	1092.59	817.841	-68.5154	1102.76	808.596	147.792	958.589	875.321	-133.429	963.146	864.954	11.5261	911.141	807.03	255.819	640.489	878.626	232.095	738.387	656.809	163.394	742.411	659.733	194.744	758.897	587.61	180.573	730.919	497.276	-244.583	659.042	868.438	-209.568	738.317	644.09	-147.937	746.333	662.624	-155.087	756.292	585.582	-137.135	731.155	498.14
118	1.17	3.00733	1095.1	770.461	72.0662	1092.62	817.87	-68.4807	1102.8	808.613	147.814	958.583	875.347	-133.406	963.135	864.967	11.5625	911.126	807.03	255.802	640.489	878.624	232.124	738.365	656.824	163.445	742.411	659.766	194.735	758.894	587.557	180.588	730.923	497.249	-244.575	659.161	868.577	-209.765	738.424	643.479	-147.866	746.253	662.459	-155.281	756.825	584.677	-137.017	731.535	497.492
119	1.18	3.04327	1095.08	770.532	72.1071	1092.6	817.953	-68.4339	1102.82	808.636	147.851	958.574	875.384	-133.369	963.106	864.972	11.6134	911.076	807.024	255.814	640.498	878.616	232.173	738.331	656.867	163.484	742.399	659.83	194.719	758.879	587.508	180.63	730.911	497.285	-244.56	659.224	868.638	-210.027	738.56	642.708	-147.816	746.205	662.398	-155.533	757.454	583.508	-136.861	731.996	496.677
120	1.19	3.0829	1095.06	770.565	72.1233	1092.57	818.012	-68.4374	1102.81	808.63	147.868	958.572	875.386	-133.338	963.079	864.972	11.6518	911.076	807.018	255.855	640.493	878.619	232.21	738.329	656.874	163.502	742.39	659.83	194.715	758.869	587.497	180.659	730.91	497.322	-244.54	659.21	868.618	-209.86	738.48	643.102	-147.796	746.168	662.387	-155.378	757.106	584.117	-136.9	731.722	497.089
121	1.2	3.03541	1095.03	770.65	72.1096	1092.55	818.015	-68.49	1102.76	808.684	147.847	958.558	875.403	-133.363	963.055	864.987	11.6042	911.051	807.043	255.89	640.44	878.551	232.183	738.321	656.853	163.465	742.377	659.802	194.703	758.86	587.478	180.654	730.886	497.311	-244.588	659.138	868.597	-210.325	738.66	642.015	-147.85	746.155	662.429	-155.808	758.019	582.396	-136.806	732.425	495.911
122	1.21	2.96014	1095	770.702	72.0426	1092.55	818.017	-68.5756	1102.71	808.79	147.808	958.544	875.437	-133.406	963.032	865.035	11.509	910.989	807.129	255.904	640.385	878.505	232.118	738.302	656.825	163.388	742.369	659.748	194.661	758.864	587.455	180.604	730.851	497.306	-244.624	659.021	868.554	-210.261	738.567	642.382	-147.971	746.284	662.661	-155.74	757.707	582.925	-136.952	732.194	496.312
123	1.22	2.90449	1095.03	770.667	71.9727	1092.57	818.003	-68.6302	1102.67	808.876	147.777	958.546	875.462	-133.434	963.018	865.09	11.4481	910.979	807.158	255.892	640.349	878.503	232.077	738.298	656.82	163.35	742.377	659.758	194.624	758.887	587.447	180.559	730.836	497.331	-244.618	658.914	868.503	-209.808	738.338	643.687	-148.121	746.565	663.099	-155.32	756.591	584.975	-137.184	731.379	497.712
124	1.23	2.91021	1095.03	770.658	71.9547	1092.57	817.989	-68.6387	1102.67	808.879	147.75	958.545	875.467	-133.454	963.016	865.106	11.4253	910.998	807.11	255.864	640.351	878.541	232.053	738.321	656.809	163.313	742.39	659.766	194.615	758.883	587.446	180.537	730.848	497.318	-244.613	658.904	868.506	-209.707	738.284	644.009	-148.127	746.518	662.992	-155.223	756.308	585.504	-137.247	731.193	498.069
125	1.24	2.94262	1095.04	770.662	71.9982	1092.59	818.04	-68.5964	1102.7	808.879	147.764	958.563	875.494	-133.453	963.054	865.135	11.4707	911.008	807.043	255.849	640.404	878.579	232.068	738.342	656.791	163.362	742.394	659.815	194.651	758.876	587.501	180.534	730.873	497.287	-244.593	659	868.594	-209.639	738.285	644.084	-148.017	746.291	662.622	-155.18	756.273	585.624	-137.242	731.158	498.157
126	1.25	3.01955	1095.07	770.698	72.0558	1092.62	818.087	-68.5154	1102.76	808.879	147.801	958.599	875.518	-133.42	963.092	865.183	11.5389	911.039	807.039	255.83	640.479	878.597	232.122	738.384	656.79	163.435	742.433	659.832	194.684	758.904	587.52	180.565	730.931	497.268	-244.54	659.101	868.617	-209.574	738.318	644.123	-147.921	746.243	662.515	-155.134	756.306	585.64	-137.174	731.181	498.151
127	1.26	3.08642	1095.07	770.708	72.1121	1092.6	818.124	-68.4469	1102.81	808.831	147.829	958.594	875.508	-133.382	963.09	865.209	11.6163	911.01	807.091	255.795	640.531	878.631	232.162	738.401	656.801	163.491	742.44	659.836	194.703	758.903	587.513	180.582	730.97	497.263	-244.478	659.163	868.598	-209.747	738.448	643.504	-147.838	746.217	662.413	-155.297	756.847	584.653	-137.01	731.587	497.441
128	1.27	3.08881	1095.05	770.724	72.1396	1092.57	818.157	-68.4247	1102.81	808.839	147.846	958.567	875.532	-133.371	963.051	865.204	11.6437	910.919	807.223	255.766	640.528	878.642	232.176	738.379	656.832	163.502	742.419	659.846	194.723	758.886	587.504	180.574	730.962	497.271	-244.481	659.185	868.619	-210.266	738.688	642.14	-147.849	746.301	662.568	-155.76	757.961	582.541	-136.796	732.433	495.939
129	1.28	3.09054	1095.01	770.806	72.1413	1092.54	818.171	-68.4324	1102.78	808.916	147.85	958.538	875.583	-133.364	963.013	865.213	11.6271	910.867	807.286	255.77	640.494	878.633	232.177	738.348	656.853	163.495	742.396	659.865	194.762	758.894	587.509	180.573	730.925	497.286	-244.501	659.12	868.62	-210.168	738.599	642.425	-147.905	746.454	662.816	-155.659	757.705	582.986	-136.83	732.211	496.28
130	1.29	3.05424	1094.99	770.825	72.1196	1092.53	818.175	-68.47	1102.74	808.971	147.845	958.517	875.616	-133.366	963	865.271	11.5969	910.849	807.311	255.815	640.424	878.605	232.165	738.31	656.864	163.466	742.405	659.796	194.786	758.905	587.52	180.564	730.879	497.29	-244.535	659.043	868.597	-209.707	738.35	643.688	-147.904	746.374	662.72	-155.226	756.615	584.971	-137.05	731.385	497.682
131	1.3	3.01779	1094.99	770.837	72.0857	1092.52	818.2	-68.508	1102.72	809.003	147.839	958.501	875.63	-133.37	962.995	865.268	11.5358	910.864	807.33	255.865	640.384	878.58	232.126	738.304	656.847	163.408	742.393	659.77	194.785	758.899	587.549	180.551	730.849	497.302	-244.534	658.978	868.555	-209.64	738.318	643.997	-148.064	746.599	663.102	-155.138	756.312	585.503	-137.161	731.207	498.02
132	1.31	2.99406	1095.03	770.827	72.0648	1092.54	818.201	-68.5248	1102.74	808.997	147.831	958.51	875.641	-133.385	963	865.288	11.4998	910.927	807.343	255.881	640.349	878.539	232.124	738.326	656.861	163.379	742.425	659.812	194.768	758.924	587.602	180.539	730.863	497.335	-244.538	658.975	868.602	-209.63	738.323	644.091	-148.071	746.554	663.047	-155.15	756.24	585.667	-137.226	731.178	498.139
133	1.32	3.01053	1095.07	770.847	72.086	1092.57	818.215	-68.5078	1102.77	809.006	147.853	958.549	875.678	-133.374	963.015	865.346	11.5301	910.967	807.287	255.875	640.301	878.495	232.151	738.347	656.891	163.412	742.443	659.832	194.739	758.94	587.584	180.559	730.884	497.357	-244.502	658.978	868.62	-209.623	738.323	644.129	-147.97	746.3	662.682	-155.127	756.254	585.698	-137.226	731.16	498.218
134	1.33	3.04946	1095.09	770.855	72.1303	1092.59	818.21	-68.4706	1102.78	808.996	147.881	958.549	875.661	-133.344	963.013	865.364	11.5834	910.975	807.236	255.844	640.303	878.501	232.179	738.367	656.891	163.45	742.466	659.79	194.722	758.933	587.513	180.58	730.915	497.331	-244.436	659.006	868.622	-209.579	738.31	644.146	-147.928	746.217	662.564	-155.09	756.266	585.683	-137.182	731.16	498.214
135	1.34	3.10931	1095.07	770.87	72.159	1092.58	818.212	-68.4305	1102.79	808.995	147.884	958.536	875.605	-133.32	963.012	865.362	11.6371	910.956	807.178	255.8	640.366	878.559	232.184	738.371	656.864	163.505	742.475	659.803	194.742	758.905	587.509	180.57	730.946	497.322	-244.407	659.038	868.632	-209.773	738.426	643.52	-147.879	746.178	662.498	-155.293	756.798	584.705	-137.045	731.543	497.506
136	1.35	3.11749	1095.05	770.866	72.1681	1092.56	818.23	-68.4097	1102.8	809.018	147.89	958.531	875.586	-133.299	963.004	865.395	11.6423	910.883	807.288	255.781	640.448	878.616	232.167	738.366	656.825	163.509	742.441	659.871	194.738	758.901	587.506	180.55	730.941	497.293	-244.35	659.056	868.633	-210.276	738.683	642.152	-147.84	746.162	662.462	-155.782	757.961	582.584	-136.836	732.41	496.016
137	1.36	3.09291	1095.02	770.911	72.1571	1092.52	818.228	-68.4223	1102.79	809.031	147.885	958.529	875.61	-133.31	963.005	865.389	11.5967	910.824	807.392	255.793	640.483	878.642	232.142	738.347	656.805	163.481	742.412	659.873	194.715	758.907	587.5	180.518	730.923	497.269	-244.329	659.049	868.615	-210.41	738.733	641.805	-147.836	746.161	662.436	-155.917	758.259	582.031	-136.806	732.616	495.636
138	1.37	3.04656	1094.99	770.929	72.129	1092.49	818.243	-68.4423	1102.77	809.039	147.849	958.508	875.598	-133.336	962.972	865.362	11.5392	910.79	807.408	255.833	640.459	878.624	232.114	738.301	656.789	163.423	742.379	659.813	194.687	758.897	587.474	180.478	730.88	497.249	-244.357	658.995	868.6	-210.231	738.593	642.297	-147.923	746.279	662.635	-155.736	757.79	582.826	-136.915	732.268	496.201
139	1.38	3.03664	1094.96	770.957	72.1236	1092.47	818.251	-68.4591	1102.75	809.013	147.854	958.47	875.6	-133.33	962.94	865.357	11.5155	910.765	807.417	255.874	640.407	878.593	232.106	738.263	656.809	163.398	742.362	659.805	194.689	758.879	587.454	180.467	730.836	497.269	-244.388	658.967	868.629	-209.742	738.324	643.671	-148.05	746.552	663.042	-155.281	756.622	584.903	-137.134	731.408	497.679
140	1.39	3.07886	1095.01	770.921	72.1535	1092.5	818.239	-68.4511	1102.75	809.041	147.886	958.444	875.584	-133.293	962.941	865.404	11.5434	910.757	807.388	255.909	640.353	878.571	232.12	738.27	656.849	163.412	742.389	659.82	194.733	758.889	587.492	180.493	730.831	497.325	-244.382	658.935	868.627	-209.624	738.284	644.03	-148.065	746.635	663.128	-155.167	756.329	585.463	-137.183	731.201	498.056
141	1.4	3.11133	1095.08	770.795	72.1796	1092.54	818.212	-68.4102	1102.77	809.031	147.916	958.467	875.57	-133.257	962.97	865.391	11.5798	910.807	807.261	255.946	640.318	878.536	232.161	738.311	656.869	163.433	742.433	659.799	194.751	758.905	587.502	180.536	730.868	497.364	-244.364	658.964	868.65	-209.583	738.314	644.109	-148.009	746.547	662.989	-155.123	756.249	585.63	-137.173	731.185	498.126
142	1.41	3.17379	1095.14	770.728	72.2259	1092.57	818.182	-68.3673	1102.81	808.97	147.956	958.508	875.566	-133.225	962.995	865.327	11.6277	910.896	807.168	255.942	640.29	878.473	232.199	738.352	656.868	163.47	742.468	659.804	194.763	758.922	587.518	180.564	730.906	497.353	-243.981	658.713	867.983	-209.552	738.325	644.118	-147.913	746.272	662.62	-155.106	756.261	585.676	-137.151	731.192	498.14
143	1.42	3.22868	1095.16	770.723	72.2696	1092.59	818.189	-68.314	1102.85	808.92	147.983	958.54	875.585	-133.203	962.991	865.352	11.6679	910.928	807.175	255.895	640.286	878.471	232.203	738.372	656.869	163.505	742.482	659.838	194.771	758.957	587.559	180.556	730.944	497.348	-243.157	658.015	866.403	-209.539	738.341	644.167	-147.897	746.208	662.576	-155.099	756.294	585.662	-137.148	731.18	498.197
144	1.43	3.25284	1095.13	770.787	72.2943	1092.56	818.219	-68.2813	1102.87	808.911	147.967	958.526	875.565	-133.214	962.96	865.387	11.6937	910.853	807.231	255.845	640.313	878.513	232.202	738.362	656.879	163.52	742.463	659.852	194.768	758.947	587.543	180.538	730.953	497.339	-243.31	658.125	866.691	-209.759	738.431	643.614	-147.865	746.163	662.561	-155.305	756.811	584.751	-137.052	731.531	497.563
145	1.44	3.25947	1095.03	770.826	72.3025	1092.5	818.189	-68.2754	1102.81	808.914	147.967	958.498	875.529	-133.226	962.923	865.358	11.7107	910.721	807.337	255.797	640.354	878.546	232.187	738.324	656.841	163.519	742.426	659.863	194.774	758.933	587.515	180.514	730.936	497.318	-244.076	658.769	868.133	-210.272	738.641	642.237	-147.827	746.127	662.498	-155.793	757.929	582.619	-136.849	732.374	496.056
146	1.45	3.24433	1094.94	770.873	72.2883	1092.46	818.189	-68.2877	1102.76	808.922	147.945	958.484	875.524	-133.229	962.902	865.336	11.6922	910.631	807.438	255.786	640.386	878.57	232.146	738.276	656.797	163.498	742.383	659.845	194.794	758.927	587.516	180.464	730.905	497.259	-244.287	658.902	868.484	-210.171	738.549	642.455	-147.839	746.244	662.629	-155.704	757.68	583	-136.893	732.19	496.326
147	1.46	3.21556	1094.89	770.908	72.2604	1092.42	818.208	-68.3045	1102.73	808.956	147.917	958.473	875.512	-133.238	962.896	865.32	11.632	910.593	807.5	255.818	640.421	878.587	232.112	738.25	656.801	163.469	742.374	659.847	194.79	758.929	587.561	180.428	730.873	497.259	-244.354	658.911	868.566	-209.697	738.314	643.72	-147.987	746.539	663.053	-155.271	756.591	584.988	-137.111	731.36	497.706
148	1.47	3.19718	1094.9	770.832	72.2331	1092.4	818.21	-68.3196	1102.72	808.958	147.919	958.461	875.495	-133.238	962.916	865.302	11.5848	910.613	807.434	255.878	640.425	878.602	232.1	738.258	656.774	163.435	742.38	659.847	194.776	758.923	587.547	180.424	730.851	497.282	-244.346	658.911	868.569	-209.604	738.275	644.016	-148.065	746.621	663.174	-155.169	756.323	585.481	-137.177	731.168	498.041
149	1.48	3.20368	1094.97	770.701	72.2414	1092.43	818.162	-68.2989	1102.75	808.906	147.937	958.463	875.512	-133.214	962.942	865.318	11.5937	910.727	807.276	255.927	640.38	878.56	232.12	738.292	656.783	163.413	742.437	659.79	194.778	758.934	587.553	180.442	730.844	497.281	-244.315	658.895	868.537	-209.595	738.288	644.104	-148.034	746.55	662.983	-155.13	756.275	585.566	-137.206	731.159	498.149
150	1.49	3.23978	1095	770.673	72.2737	1092.46	818.141	-68.2502	1102.79	808.843	147.962	958.478	875.548	-133.196	962.955	865.324	11.6291	910.78	807.225	255.936	640.32	878.523	232.161	738.323	656.861	163.442	742.476	659.809	194.772	758.944	587.538	180.474	730.867	497.354	-244.32	658.95	868.608	-209.586	738.309	644.131	-147.936	746.303	662.637	-155.107	756.298	585.609	-137.201	731.174	498.174
151	1.5	3.27704	1095.01	770.644	72.3171	1092.48	818.104	-68.2114	1102.81	808.784	147.995	958.481	875.555	-133.168	962.949	865.315	11.6747	910.793	807.206	255.93	640.25	878.486	232.205	738.346	656.907	163.482	742.484	659.83	194.753	758.93	587.496	180.495	730.898	497.392	-244.353	659.048	868.733	-209.564	738.323	644.127	-147.908	746.211	662.539	-155.102	756.303	585.604	-137.168	731.16	498.171
152	1.51	3.30684	1095.01	770.53	72.3378	1092.45	818.079	-68.1891	1102.82	808.722	148.003	958.473	875.517	-133.149	962.927	865.253	11.7052	910.756	807.209	255.918	640.233	878.461	232.229	738.345	656.878	163.503	742.467	659.834	194.738	758.924	587.494	180.497	730.91	497.355	-244.348	659.07	868.745	-209.552	738.314	644.129	-147.9	746.143	662.543	-155.105	756.281	585.582	-137.138	731.141	498.141
153	1.52	3.29812	1094.97	770.558	72.3388	1092.39	818.108	-68.2058	1102.79	808.742	147.978	958.461	875.487	-133.175	962.913	865.255	11.7027	910.687	807.282	255.898	640.25	878.467	232.193	738.325	656.829	163.496	742.435	659.865	194.706	758.919	587.477	180.454	730.91	497.316	-244.332	659.025	868.689	-209.792	738.403	643.525	-147.953	746.244	662.734	-155.347	756.774	584.651	-137.073	731.491	497.509
154	1.53	3.27679	1094.89	770.681	72.301	1092.34	818.094	-68.2503	1102.74	808.783	147.936	958.44	875.494	-133.216	962.89	865.298	11.6389	910.573	807.453	255.858	640.27	878.505	232.142	738.286	656.819	163.452	742.407	659.879	194.674	758.91	587.46	180.392	730.89	497.309	-244.324	658.898	868.556	-210.115	738.504	642.777	-148.025	746.384	662.986	-155.647	757.397	583.531	-137.015	731.924	496.755
155	1.54	3.26325	1094.79	770.78	72.2877	1092.28	818.098	-68.2644	1102.68	808.819	147.91	958.395	875.464	-133.253	962.856	865.29	11.5947	910.5	807.523	255.817	640.299	878.553	232.115	738.221	656.813	163.431	742.364	659.909	194.676	758.912	587.451	180.36	730.852	497.288	-244.343	658.844	868.54	-209.736	738.268	643.828	-148.011	746.288	662.845	-155.298	756.493	585.114	-137.166	731.238	497.866
156	1.55	3.27941	1094.74	770.807	72.3192	1092.24	818.139	-68.2361	1102.66	808.771	147.914	958.357	875.436	-133.247	962.842	865.289	11.6	910.499	807.486	255.787	640.292	878.549	232.105	738.204	656.814	163.447	742.33	659.919	194.73	758.902	587.492	180.34	730.825	497.277	-244.365	658.865	868.564	-209.607	738.212	644.102	-148.067	746.489	663.09	-155.182	756.247	585.499	-137.205	731.086	498.13
157	1.56	3.30833	1094.79	770.752	72.344	1092.26	818.093	-68.1985	1102.69	808.763	147.934	958.384	875.464	-133.218	962.858	865.308	11.6143	910.559	807.432	255.807	640.31	878.559	232.131	738.223	656.852	163.475	742.34	659.906	194.793	758.903	587.52	180.356	730.839	497.296	-244.361	658.897	868.569	-209.565	738.235	644.138	-147.983	746.466	662.932	-155.137	756.216	585.594	-137.187	731.087	498.171
158	1.57	3.33749	1094.88	770.662	72.3774	1092.32	818.081	-68.1461	1102.77	808.741	147.959	958.448	875.497	-133.189	962.911	865.287	11.6371	910.692	807.263	255.828	640.306	878.547	232.158	738.288	656.842	163.47	742.429	659.845	194.827	758.928	587.554	180.412	730.883	497.344	-244.348	658.996	868.645	-209.539	738.302	644.106	-147.868	746.308	662.543	-155.107	756.262	585.626	-137.157	731.161	498.156
159	1.58	3.39178	1094.98	770.504	72.4185	1092.39	818.058	-68.0869	1102.84	808.624	147.988	958.487	875.518	-133.156	962.97	865.236	11.6716	910.791	807.142	255.839	640.311	878.579	232.188	738.359	656.852	163.488	742.496	659.799	194.842	758.947	587.603	180.452	730.929	497.37	-244.307	659.072	868.657	-209.525	738.361	644.096	-147.851	746.279	662.477	-155.059	756.313	585.6	-137.142	731.215	498.165
160	1.59	3.4371	1095.02	770.448	72.4596	1092.4	818.049	-68.0579	1102.87	808.569	148.011	958.499	875.548	-133.13	962.968	865.257	11.7164	910.824	807.138	255.83	640.271	878.569	232.215	738.383	656.897	163.508	742.525	659.827	194.845	758.954	587.632	180.474	730.943	497.393	-244.294	659.071	868.663	-209.52	738.378	644.104	-147.849	746.249	662.49	-155.054	756.34	585.619	-137.146	731.214	498.171
161	1.6	3.43158	1094.97	770.499	72.467	1092.39	818.068	-68.0762	1102.85	808.63	148.012	958.486	875.572	-133.141	962.923	865.301	11.7188	910.751	807.185	255.811	640.217	878.52	232.217	738.372	656.916	163.507	742.497	659.881	194.824	758.948	587.599	180.465	730.927	497.417	-244.339	659.057	868.762	-209.536	738.345	644.147	-147.852	746.211	662.474	-155.071	756.311	585.667	-137.16	731.174	498.199
162	1.61	3.4202	1094.91	770.548	72.435	1092.33	818.076	-68.0971	1102.79	808.668	147.99	958.433	875.521	-133.179	962.863	865.287	11.6908	910.653	807.308	255.78	640.193	878.496	232.186	738.316	656.878	163.472	742.448	659.872	194.8	758.937	587.582	180.427	730.902	497.386	-244.374	658.939	868.681	-209.542	738.279	644.154	-147.91	746.275	662.671	-155.099	756.243	585.662	-137.179	731.113	498.228
163	1.62	3.39934	1094.82	770.651	72.3915	1092.26	818.078	-68.128	1102.72	808.681	147.948	958.378	875.478	-133.21	962.782	865.25	11.6651	910.475	807.554	255.766	640.198	878.488	232.131	738.239	656.826	163.435	742.364	659.881	194.748	758.93	587.513	180.367	730.855	497.339	-244.378	658.797	868.539	-209.793	738.325	643.532	-148.058	746.484	663.143	-155.345	756.712	584.707	-137.116	731.405	497.592
164	1.63	3.34438	1094.76	770.796	72.3674	1092.22	818.094	-68.1714	1102.65	808.732	147.928	958.362	875.52	-133.223	962.729	865.296	11.627	910.32	807.785	255.764	640.227	878.507	232.112	738.2	656.83	163.414	742.323	659.926	194.714	758.928	587.493	180.311	730.824	497.318	-244.421	658.769	868.541	-210.354	738.54	642.17	-148.111	746.499	663.276	-155.849	757.855	582.615	-136.973	732.194	496.177
165	1.64	3.33312	1094.76	770.818	72.3657	1092.22	818.11	-68.1646	1102.65	808.765	147.911	958.368	875.504	-133.226	962.724	865.275	11.6366	910.306	807.813	255.767	640.264	878.542	232.098	738.204	656.816	163.409	742.332	659.919	194.709	758.932	587.496	180.286	730.822	497.282	-244.386	658.78	868.558	-210.477	738.601	641.859	-148.062	746.416	663.094	-155.991	758.144	582.124	-136.917	732.427	495.821
166	1.65	3.38228	1094.79	770.686	72.3983	1092.25	818.106	-68.1021	1102.7	808.688	147.925	958.374	875.479	-133.206	962.72	865.224	11.6839	910.383	807.641	255.782	640.311	878.606	232.107	738.222	656.791	163.441	742.342	659.902	194.729	758.925	587.484	180.301	730.847	497.295	-244.301	658.812	868.547	-210.237	738.54	642.371	-147.909	746.189	662.613	-155.771	757.725	582.875	-136.94	732.147	496.298
167	1.66	3.41522	1094.86	770.584	72.4363	1092.3	818.071	-68.0476	1102.77	808.582	147.955	958.415	875.505	-133.182	962.768	865.226	11.7226	910.5	807.44	255.806	640.344	878.641	232.149	738.265	656.846	163.481	742.369	659.894	194.734	758.906	587.487	180.346	730.883	497.348	-244.249	658.935	868.639	-209.7	738.331	643.688	-147.841	746.13	662.466	-155.261	756.631	584.885	-137.081	731.37	497.665
168	1.67	3.40035	1094.98	770.47	72.4434	1092.37	818.065	-68.0346	1102.86	808.555	147.947	958.475	875.501	-133.171	962.859	865.259	11.687	910.665	807.276	255.834	640.344	878.6	232.166	738.35	656.865	163.477	742.457	659.897	194.758	758.926	587.536	180.36	730.929	497.36	-244.225	659.017	868.677	-209.554	738.355	643.993	-147.859	746.196	662.432	-155.108	756.407	585.396	-137.133	731.262	498.014
169	1.68	3.35391	1095.07	770.313	72.4257	1092.43	818.048	-68.0487	1102.9	808.56	147.927	958.516	875.46	-133.188	962.907	865.268	11.6427	910.834	807.096	255.874	640.329	878.583	232.146	738.393	656.844	163.418	742.538	659.841	194.766	758.955	587.571	180.352	730.971	497.377	-244.218	659.04	868.704	-209.552	738.388	644.06	-147.911	746.274	662.459	-155.084	756.361	585.538	-137.179	731.288	498.102
170	1.69	3.33672	1095.05	770.335	72.405	1092.42	818.067	-68.0843	1102.85	808.622	147.916	958.504	875.475	-133.216	962.873	865.261	11.6152	910.84	807.11	255.89	640.276	878.564	232.118	738.382	656.821	163.38	742.542	659.784	194.748	758.97	587.569	180.338	730.941	497.368	-244.249	658.949	868.677	-209.57	738.363	644.064	-147.966	746.389	662.633	-155.11	756.314	585.576	-137.225	731.266	498.121
171	1.7	3.32173	1094.96	770.494	72.392	1092.36	818.124	-68.1423	1102.77	808.685	147.919	958.453	875.501	-133.229	962.794	865.3	11.5787	910.704	807.294	255.873	640.235	878.548	232.124	738.314	656.858	163.399	742.472	659.835	194.773	758.973	587.565	180.318	730.881	497.411	-244.312	658.791	868.602	-209.583	738.302	644.098	-148.065	746.598	663.05	-155.136	756.256	585.613	-137.253	731.177	498.147
172	1.71	3.32831	1094.83	770.729	72.3806	1092.27	818.167	-68.1729	1102.69	808.75	147.939	958.404	875.537	-133.209	962.711	865.332	11.5999	910.527	807.553	255.846	640.185	878.497	232.142	738.229	656.902	163.429	742.362	659.884	194.801	758.964	587.555	180.304	730.833	497.422	-244.348	658.686	868.569	-209.804	738.338	643.553	-148.06	746.565	663.209	-155.367	756.706	584.722	-137.163	731.445	497.547
173	1.72	3.3466	1094.77	770.79	72.3914	1092.24	818.179	-68.1648	1102.65	808.782	147.957	958.371	875.562	-133.171	962.629	865.33	11.6725	910.396	807.768	255.831	640.191	878.486	232.176	738.173	656.918	163.458	742.294	659.933	194.827	758.958	587.602	180.297	730.816	497.395	-244.351	658.652	868.583	-210.315	738.536	642.209	-148.028	746.507	663.286	-155.836	757.822	582.656	-136.923	732.207	496.138
174	1.73	3.35404	1094.78	770.807	72.4021	1092.24	818.221	-68.1329	1102.65	808.807	147.98	958.379	875.6	-133.154	962.623	865.371	11.7223	910.335	807.889	255.82	640.233	878.52	232.201	738.178	656.951	163.481	742.301	659.973	194.831	758.966	587.662	180.292	730.827	497.379	-244.331	658.745	868.637	-210.434	738.63	641.873	-147.97	746.374	663.148	-155.923	758.116	582.154	-136.839	732.407	495.824
175	1.74	3.37488	1094.84	770.811	72.4144	1092.29	818.23	-68.0945	1102.71	808.808	147.992	958.415	875.604	-133.155	962.676	865.389	11.7491	910.38	807.867	255.794	640.282	878.568	232.21	738.221	656.959	163.502	742.34	660.013	194.815	758.979	587.686	180.284	730.874	497.413	-243.921	658.543	867.967	-210.457	738.699	641.817	-147.867	746.135	662.71	-155.927	758.238	582.004	-136.805	732.52	495.696
176	1.75	3.39626	1094.92	770.662	72.4367	1092.33	818.187	-68.0614	1102.8	808.711	147.978	958.449	875.53	-133.14	962.737	865.379	11.7356	910.546	807.578	255.779	640.318	878.621	232.203	738.297	656.921	163.507	742.4	659.979	194.812	758.964	587.631	180.292	730.924	497.382	-243.095	658	866.542	-210.2	738.625	642.366	-147.82	746.134	662.512	-155.697	757.82	582.827	-136.86	732.267	496.209
177	1.76	3.3664	1095	770.434	72.4363	1092.37	818.108	-68.0607	1102.85	808.632	147.939	958.464	875.436	-133.161	962.791	865.373	11.6863	910.731	807.294	255.782	640.329	878.629	232.16	738.367	656.839	163.485	742.479	659.854	194.829	758.955	587.581	180.299	730.949	497.342	-243.273	658.224	866.98	-209.671	738.417	643.661	-147.804	746.189	662.388	-155.2	756.697	584.867	-137.051	731.512	497.575
178	1.77	3.28083	1095.01	770.392	72.3675	1092.37	818.052	-68.1122	1102.84	808.673	147.88	958.472	875.414	-133.217	962.816	865.36	11.5938	910.812	807.208	255.784	640.315	878.625	232.091	738.371	656.797	163.399	742.501	659.773	194.809	758.97	587.564	180.25	730.946	497.339	-243.977	658.743	868.228	-209.598	738.393	643.969	-147.892	746.362	662.538	-155.1	756.39	585.41	-137.161	731.325	497.935
179	1.78	3.20796	1094.96	770.453	72.2832	1092.3	818.084	-68.2044	1102.79	808.746	147.842	958.45	875.435	-133.264	962.781	865.377	11.5026	910.73	807.373	255.784	640.276	878.59	232.037	738.328	656.821	163.321	742.466	659.79	194.746	758.967	587.577	180.204	730.916	497.374	-244.224	658.796	868.522	-209.623	738.36	644.085	-148.082	746.627	663.03	-155.149	756.295	585.561	-137.238	731.255	498.067
180	1.79	3.18307	1094.85	770.605	72.249	1092.25	818.123	-68.2654	1102.74	808.797	147.847	958.394	875.463	-133.282	962.719	865.392	11.4569	910.594	807.548	255.791	640.246	878.563	232.018	738.264	656.832	163.297	742.409	659.837	194.696	758.96	587.556	180.19	730.861	497.4	-244.335	658.761	868.618	-209.638	738.296	644.137	-148.171	746.645	663.199	-155.193	756.233	585.619	-137.297	731.164	498.166
181	1.8	3.22734	1094.78	770.768	72.2731	1092.21	818.141	-68.2641	1102.69	808.837	147.873	958.351	875.506	-133.272	962.645	865.405	11.5006	910.458	807.704	255.792	640.195	878.529	232.049	738.206	656.872	163.342	742.353	659.902	194.692	758.959	587.522	180.195	730.825	497.393	-244.366	658.713	868.646	-209.868	738.336	643.585	-148.165	746.582	663.282	-155.41	756.712	584.725	-137.201	731.469	497.575
182	1.81	3.2903	1094.76	770.855	72.3282	1092.21	818.16	-68.2193	1102.67	808.851	147.918	958.349	875.53	-133.224	962.58	865.402	11.5959	910.368	807.8	255.756	640.162	878.527	232.115	738.195	656.922	163.427	742.323	659.95	194.737	758.97	587.544	180.22	730.825	497.393	-244.366	658.747	868.681	-210.374	738.551	642.214	-148.043	746.404	663.109	-155.862	757.861	582.639	-136.96	732.263	496.166
183	1.82	3.35513	1094.78	770.732	72.4041	1092.23	818.155	-68.121	1102.67	808.759	147.961	958.349	875.538	-133.183	962.577	865.39	11.6993	910.364	807.761	255.701	640.177	878.574	232.199	738.196	656.98	163.487	742.31	659.992	194.758	758.96	587.514	180.247	730.845	497.374	-243.985	658.492	868.008	-210.443	738.637	641.837	-147.865	746.092	662.647	-155.922	758.15	582.083	-136.815	732.455	495.774
184	1.83	3.37856	1094.83	770.624	72.434	1092.27	818.103	-68.0451	1102.72	808.696	147.975	958.368	875.543	-133.171	962.619	865.39	11.7367	910.418	807.658	255.675	640.222	878.618	232.222	738.228	656.958	163.514	742.332	659.988	194.764	758.956	587.501	180.267	730.893	497.337	-243.493	658.151	867.146	-210.435	738.688	641.755	-147.808	746.026	662.478	-155.905	758.241	581.932	-136.761	732.532	495.632
185	1.84	3.36612	1094.87	770.645	72.4181	1092.3	818.099	-68.0588	1102.78	808.671	147.942	958.406	875.544	-133.191	962.666	865.418	11.698	910.491	807.547	255.675	640.276	878.65	232.184	738.277	656.923	163.483	742.366	659.965	194.796	758.98	587.564	180.261	730.928	497.344	-244.08	658.715	868.347	-210.199	738.606	642.371	-147.797	746.075	662.475	-155.713	757.78	582.872	-136.853	732.244	496.202
186	1.85	3.32121	1094.9	770.628	72.4019	1092.29	818.172	-68.1053	1102.82	808.66	147.886	958.425	875.514	-133.244	962.7	865.414	11.6051	910.565	807.478	255.676	640.301	878.682	232.136	738.308	656.901	163.427	742.401	659.963	194.811	758.977	587.626	180.222	730.937	497.361	-244.244	658.88	868.69	-209.694	738.366	643.728	-147.835	746.167	662.51	-155.274	756.675	584.958	-137.096	731.446	497.656
187	1.86	3.26794	1094.91	770.529	72.3756	1092.26	818.148	-68.1445	1102.8	808.649	147.847	958.422	875.45	-133.288	962.715	865.353	11.5465	910.577	807.431	255.687	640.295	878.693	232.087	738.31	656.894	163.38	742.421	659.914	194.814	758.968	587.633	180.169	730.925	497.343	-244.286	658.861	868.678	-209.599	738.321	644.032	-147.916	746.347	662.629	-155.154	756.375	585.448	-137.185	731.264	497.973
188	1.87	3.24995	1094.9	770.518	72.3457	1092.26	818.1	-68.1607	1102.79	808.639	147.827	958.404	875.447	-133.304	962.716	865.35	11.5057	910.599	807.366	255.7	640.283	878.676	232.069	738.307	656.9	163.373	742.422	659.883	194.832	758.961	587.622	180.158	730.911	497.352	-244.311	658.792	868.619	-209.593	738.32	644.092	-148.051	746.632	663.013	-155.107	756.272	585.577	-137.212	731.228	498.079
189	1.88	3.25192	1094.88	770.6	72.3355	1092.27	818.081	-68.1848	1102.75	808.686	147.836	958.389	875.475	-133.293	962.693	865.367	11.4948	910.599	807.382	255.729	640.252	878.665	232.082	738.277	656.91	163.386	742.419	659.905	194.838	758.959	587.644	180.184	730.87	497.399	-244.339	658.748	868.616	-209.59	738.317	644.156	-148.087	746.678	663.146	-155.102	756.246	585.643	-137.208	731.211	498.131
190	1.89	3.26423	1094.88	770.565	72.3378	1092.27	818.073	-68.1747	1102.75	808.654	147.857	958.385	875.493	-133.281	962.665	865.338	11.5409	910.554	807.424	255.734	640.22	878.623	232.112	738.256	656.913	163.419	742.393	659.92	194.823	758.965	587.665	180.214	730.852	497.435	-244.367	658.751	868.628	-209.578	738.295	644.154	-148.03	746.538	663.018	-155.105	756.252	585.663	-137.211	731.167	498.162
191	1.9	3.28872	1094.86	770.534	72.359	1092.27	818.091	-68.1475	1102.75	808.617	147.884	958.378	875.513	-133.252	962.62	865.315	11.6119	910.49	807.479	255.711	640.182	878.589	232.147	738.258	656.922	163.459	742.37	659.971	194.807	758.971	587.652	180.233	730.865	497.434	-244.361	658.762	868.608	-209.794	738.38	643.54	-147.907	746.208	662.656	-155.318	756.749	584.739	-137.09	731.501	497.537
192	1.91	3.31389	1094.84	770.638	72.3669	1092.28	818.084	-68.1298	1102.72	808.665	147.913	958.377	875.537	-133.234	962.578	865.337	11.6631	910.406	807.568	255.678	640.167	878.58	232.198	738.244	656.97	163.482	742.352	660.026	194.811	758.975	587.628	180.252	730.877	497.445	-244.385	658.81	868.687	-210.303	738.612	642.208	-147.875	746.062	662.596	-155.801	757.884	582.65	-136.852	732.29	496.122
193	1.92	3.31397	1094.81	770.659	72.3452	1092.26	818.059	-68.1228	1102.68	808.673	147.914	958.361	875.508	-133.243	962.533	865.304	11.6714	910.357	807.588	255.657	640.183	878.602	232.203	738.224	656.959	163.48	742.316	660.03	194.793	758.975	587.575	180.241	730.876	497.394	-244.385	658.826	868.697	-210.43	738.647	641.857	-147.863	745.988	662.579	-155.932	758.158	582.105	-136.792	732.459	495.791
194	1.93	3.29288	1094.77	770.649	72.3231	1092.22	818.043	-68.1507	1102.66	808.644	147.873	958.339	875.414	-133.288	962.539	865.277	11.6312	910.335	807.564	255.619	640.201	878.606	232.164	738.211	656.911	163.46	742.312	659.981	194.768	758.965	587.532	180.208	730.861	497.351	-244.391	658.813	868.658	-210.455	738.637	641.729	-147.859	745.981	662.524	-155.96	758.217	581.943	-136.789	732.507	495.675
195	1.94	3.23243	1094.76	770.638	72.282	1092.21	818.028	-68.2098	1102.68	808.657	147.813	958.347	875.356	-133.325	962.566	865.297	11.5601	910.378	807.526	255.606	640.22	878.598	232.11	738.222	656.869	163.417	742.316	659.961	194.75	758.958	587.521	180.162	730.856	497.36	-244.394	658.773	868.589	-210.262	738.534	642.305	-147.884	746.052	662.51	-155.767	757.742	582.823	-136.922	732.207	496.248
196	1.95	3.15684	1094.81	770.555	72.2272	1092.22	818.016	-68.2611	1102.7	808.65	147.754	958.364	875.319	-133.374	962.613	865.271	11.4495	910.46	807.367	255.635	640.255	878.625	232.033	738.273	656.84	163.364	742.348	659.929	194.719	758.966	587.502	180.122	730.867	497.352	-244.429	658.752	868.614	-209.788	738.333	643.675	-147.983	746.277	662.693	-155.302	756.619	584.938	-137.171	731.411	497.708
197	1.96	3.11253	1094.85	770.437	72.2009	1092.23	818.006	-68.2926	1102.71	808.6	147.73	958.383	875.308	-133.39	962.644	865.267	11.3882	910.536	807.196	255.68	640.289	878.655	232.01	738.299	656.839	163.31	742.389	659.872	194.72	758.986	587.522	180.109	730.892	497.333	-244.436	658.749	868.636	-209.671	738.315	643.977	-148.114	746.611	663.066	-155.187	756.356	585.464	-137.219	731.257	498.025
198	1.97	3.12129	1094.86	770.369	72.228	1092.23	817.996	-68.2712	1102.73	808.602	147.748	958.388	875.32	-133.37	962.647	865.286	11.404	910.585	807.131	255.706	640.265	878.652	232.029	738.302	656.831	163.319	742.414	659.873	194.751	758.985	587.575	180.141	730.89	497.351	-244.411	658.733	868.58	-209.63	738.307	644.055	-148.079	746.571	662.958	-155.138	756.293	585.584	-137.214	731.238	498.092
199	1.98	3.14693	1094.86	770.401	72.2624	1092.25	818.028	-68.247	1102.74	808.609	147.794	958.387	875.362	-133.347	962.62	865.317	11.4509	910.552	807.2	255.712	640.244	878.659	232.078	738.315	656.889	163.398	742.423	659.932	194.787	758.982	587.616	180.184	730.879	497.412	-244.409	658.756	868.615	-209.602	738.306	644.112	-147.913	746.302	662.521	-155.118	756.284	585.597	-137.208	731.207	498.125
200	1.99	3.21098	1094.85	770.405	72.2851	1092.26	818.04	-68.2516	1102.75	808.623	147.825	958.393	875.398	-133.307	962.591	865.344	11.51	910.497	807.305	255.725	640.225	878.641	232.133	738.311	656.948	163.452	742.413	659.972	194.816	759.001	587.627	180.23	730.875	497.45	-244.42	658.797	868.676	-209.561	738.301	644.162	-147.871	746.218	662.477	-155.1	756.294	585.627	-137.168	731.174	498.168
201	2	3.26021	1094.81	770.455	72.3042	1092.25	818.034	-68.2358	1102.73	808.61	147.86	958.39	875.445	-133.284	962.542	865.352	11.5786	910.436	807.399	255.715	640.208	878.614	232.202	738.299	656.978	163.48	742.384	659.998	194.833	759.019	587.654	180.257	730.875	497.453	-244.398	658.773	868.641	-209.765	738.38	643.583	-147.855	746.121	662.516	-155.3	756.799	584.716	-137.037	731.51	497.553
202	2.01	3.26237	1094.75	770.589	72.3114	1092.21	818.076	-68.2341	1102.67	808.658	147.889	958.362	875.475	-133.28	962.492	865.366	11.6396	910.307	807.607	255.683	640.19	878.603	232.217	738.267	656.996	163.51	742.352	660.042	194.849	759.013	587.677	180.262	730.873	497.455	-244.43	658.774	868.668	-210.278	738.596	642.193	-147.815	746.034	662.508	-155.782	757.902	582.657	-136.834	732.307	496.122
203	2.02	3.21771	1094.7	770.67	72.2849	1092.15	818.099	-68.2549	1102.62	808.666	147.865	958.348	875.47	-133.306	962.468	865.378	11.6267	910.243	807.691	255.666	640.209	878.6	232.188	738.234	656.975	163.499	742.318	660.058	194.856	758.989	587.673	180.236	730.856	497.429	-244.456	658.727	868.662	-210.429	738.613	641.856	-147.853	746.148	662.708	-155.911	758.152	582.14	-136.802	732.487	495.778
204	2.03	3.17128	1094.66	770.717	72.234	1092.1	818.083	-68.3019	1102.6	808.673	147.812	958.339	875.452	-133.338	962.477	865.384	11.5554	910.236	807.646	255.647	640.242	878.607	232.147	738.223	656.956	163.479	742.31	660.043	194.85	758.978	587.659	180.209	730.841	497.402	-244.489	658.709	868.695	-210.242	738.51	642.368	-147.976	746.444	663.141	-155.756	757.703	582.933	-136.897	732.167	496.309
205	2.04	3.11695	1094.66	770.713	72.1887	1092.1	818.057	-68.3413	1102.59	808.691	147.757	958.334	875.408	-133.383	962.512	865.387	11.4937	910.299	807.612	255.662	640.267	878.627	232.092	738.266	656.912	163.438	742.335	660.001	194.822	758.982	587.66	180.179	730.85	497.393	-244.491	658.699	868.653	-209.74	738.295	643.691	-148.05	746.575	663.256	-155.306	756.591	585.003	-137.122	731.357	497.714
206	2.05	3.06904	1094.71	770.611	72.1546	1092.16	818.028	-68.3523	1102.63	808.683	147.713	958.349	875.363	-133.405	962.559	865.38	11.4396	910.441	807.47	255.692	640.295	878.661	232.042	738.315	656.878	163.37	742.382	659.965	194.794	759	587.652	180.159	730.878	497.402	-244.459	658.701	868.625	-209.631	738.29	644.039	-148.039	746.536	663.09	-155.175	756.338	585.504	-137.211	731.219	498.066
207	2.06	3.04824	1094.77	770.503	72.1571	1092.21	818.021	-68.3467	1102.69	808.681	147.722	958.383	875.379	-133.401	962.586	865.379	11.4128	910.517	807.322	255.72	640.313	878.665	232.051	738.353	656.892	163.354	742.417	659.947	194.766	759.015	587.632	180.153	730.903	497.397	-244.427	658.725	868.588	-209.609	738.314	644.116	-147.947	746.321	662.641	-155.153	756.314	585.62	-137.226	731.235	498.129
208	2.07	3.07097	1094.82	770.388	72.1759	1092.22	818.006	-68.3061	1102.72	808.634	147.73	958.382	875.368	-133.38	962.58	865.36	11.439	910.534	807.263	255.732	640.278	878.623	232.085	738.362	656.877	163.379	742.435	659.918	194.77	759	587.575	180.179	730.904	497.409	-244.43	658.795	868.641	-209.59	738.315	644.114	-147.888	746.25	662.465	-155.123	756.312	585.589	-137.189	731.229	498.099
209	2.08	3.10554	1094.82	770.337	72.1904	1092.22	817.997	-68.2856	1102.71	808.627	147.752	958.367	875.367	-133.369	962.541	865.369	11.4619	910.499	807.272	255.727	640.25	878.605	232.124	738.356	656.908	163.415	742.419	659.934	194.776	758.991	587.548	180.203	730.892	497.403	-244.425	658.836	868.679	-209.562	738.303	644.108	-147.88	746.191	662.441	-155.108	756.299	585.587	-137.164	731.207	498.113
210	2.09	3.10976	1094.76	770.48	72.1696	1092.22	817.998	-68.3275	1102.68	808.686	147.756	958.358	875.425	-133.367	962.474	865.378	11.4656	910.448	807.343	255.726	640.243	878.611	232.12	738.333	656.936	163.414	742.375	659.993	194.75	758.988	587.523	180.207	730.872	497.414	-244.47	658.808	868.708	-209.793	738.378	643.536	-147.946	746.249	662.695	-155.344	756.789	584.687	-137.092	731.544	497.528
211	2.1	3.09024	1094.72	770.615	72.1512	1092.19	818.022	-68.3735	1102.66	808.743	147.745	958.35	875.451	-133.395	962.429	865.39	11.4448	910.365	807.547	255.717	640.233	878.611	232.103	738.296	656.935	163.395	742.339	660.019	194.716	758.994	587.503	180.176	730.861	497.442	-244.522	658.755	868.718	-210.345	738.585	642.196	-148.038	746.372	663.017	-155.854	757.917	582.634	-136.924	732.347	496.103
212	2.11	3.08154	1094.69	770.63	72.1414	1092.14	818.046	-68.4048	1102.6	808.723	147.74	958.339	875.432	-133.415	962.404	865.398	11.4467	910.287	807.704	255.694	640.227	878.598	232.096	738.27	656.91	163.401	742.324	659.99	194.721	759.001	587.514	180.162	730.851	497.416	-244.556	658.669	868.632	-210.253	738.506	642.458	-148.032	746.241	662.917	-155.767	757.654	583.043	-136.971	732.122	496.405
213	2.12	3.08033	1094.67	770.685	72.1511	1092.14	818.073	-68.4268	1102.59	808.717	147.73	958.335	875.431	-133.418	962.401	865.391	11.4444	910.295	807.654	255.655	640.246	878.605	232.091	738.258	656.89	163.418	742.312	659.959	194.771	759.001	587.549	180.167	730.847	497.392	-244.616	658.673	868.693	-209.748	738.259	643.728	-148.085	746.48	663.21	-155.31	756.56	585.003	-137.135	731.312	497.784
214	2.13	3.08521	1094.68	770.684	72.1712	1092.16	818.092	-68.3974	1102.59	808.729	147.742	958.359	875.465	-133.401	962.43	865.398	11.4737	910.325	807.636	255.651	640.286	878.622	232.099	738.286	656.872	163.442	742.332	659.975	194.826	759.024	587.576	180.176	730.857	497.408	-244.614	658.652	868.697	-209.607	738.22	644.075	-148.067	746.587	663.288	-155.173	756.306	585.492	-137.153	731.146	498.132
215	2.14	3.11478	1094.72	770.627	72.1881	1092.18	818.063	-68.3547	1102.63	808.71	147.759	958.384	875.481	-133.372	962.468	865.396	11.5137	910.351	807.626	255.661	640.316	878.659	232.11	738.316	656.858	163.475	742.365	659.993	194.873	759.013	587.657	180.19	730.877	497.413	-244.562	658.71	868.682	-209.546	738.239	644.125	-147.975	746.512	663.065	-155.111	756.286	585.574	-137.125	731.152	498.148
216	2.15	3.11173	1094.76	770.57	72.1968	1092.2	818.073	-68.3372	1102.67	808.685	147.768	958.396	875.477	-133.36	962.49	865.36	11.5224	910.406	807.576	255.692	640.345	878.696	232.119	738.336	656.886	163.472	742.38	660.011	194.872	758.991	587.674	180.21	730.885	497.414	-244.531	658.768	868.686	-209.517	738.26	644.122	-147.847	746.271	662.562	-155.088	756.299	585.571	-137.138	731.175	498.156
217	2.16	3.11102	1094.79	770.586	72.206	1092.24	818.119	-68.3294	1102.72	808.68	147.762	958.407	875.493	-133.362	962.522	865.338	11.4998	910.492	807.517	255.726	640.34	878.685	232.121	738.366	656.909	163.454	742.408	660.03	194.853	759.022	587.68	180.224	730.897	497.461	-244.527	658.813	868.692	-209.526	738.315	644.163	-147.857	746.247	662.486	-155.089	756.328	585.619	-137.153	731.211	498.144
218	2.17	3.10073	1094.85	770.58	72.1981	1092.27	818.102	-68.3346	1102.74	808.708	147.751	958.408	875.467	-133.357	962.542	865.333	11.4773	910.545	807.514	255.748	640.327	878.649	232.137	738.376	656.938	163.438	742.434	659.997	194.847	759.02	587.699	180.229	730.894	497.475	-244.544	658.838	868.709	-209.54	738.327	644.191	-147.858	746.251	662.482	-155.085	756.344	585.664	-137.157	731.224	498.138
219	2.18	3.08813	1094.84	770.497	72.1838	1092.22	818.058	-68.3498	1102.69	808.669	147.741	958.364	875.404	-133.361	962.511	865.265	11.4809	910.539	807.473	255.753	640.273	878.606	232.141	738.351	656.934	163.437	742.417	659.959	194.827	758.984	587.647	180.213	730.863	497.428	-244.574	658.84	868.741	-209.536	738.301	644.177	-147.86	746.209	662.417	-155.09	756.304	585.628	-137.152	731.181	498.131
220	2.19	3.07199	1094.75	770.566	72.1749	1092.16	818.039	-68.3834	1102.63	808.662	147.743	958.317	875.386	-133.39	962.455	865.253	11.5127	910.446	807.616	255.737	640.209	878.574	232.135	738.307	656.929	163.44	742.366	659.982	194.821	758.969	587.612	180.198	730.832	497.421	-244.591	658.733	868.646	-209.548	738.256	644.161	-147.909	746.253	662.627	-155.115	756.248	585.607	-137.146	731.115	498.149
221	2.2	3.03004	1094.68	770.652	72.1544	1092.1	818.068	-68.4385	1102.58	808.725	147.738	958.304	875.41	-133.403	962.401	865.278	11.4846	910.33	807.797	255.713	640.189	878.58	232.122	738.265	656.95	163.429	742.327	660.014	194.791	758.957	587.597	180.182	730.822	497.457	-244.61	658.666	868.61	-209.572	738.201	644.171	-148.028	746.487	663.087	-155.148	756.207	585.644	-137.17	731.069	498.195
222	2.21	2.99803	1094.64	770.663	72.1177	1092.06	818.074	-68.4539	1102.55	808.737	147.722	958.326	875.393	-133.416	962.399	865.273	11.4735	910.292	807.871	255.688	640.213	878.598	232.093	738.252	656.931	163.404	742.32	660.025	194.756	758.955	587.606	180.153	730.814	497.431	-244.636	658.696	868.669	-209.578	738.166	644.173	-148.058	746.395	663.078	-155.179	756.188	585.715	-137.187	731.038	498.236
223	2.22	3.00178	1094.62	770.655	72.0967	1092.06	818.052	-68.4385	1102.55	808.706	147.719	958.353	875.381	-133.411	962.412	865.245	11.4858	910.313	807.852	255.676	640.239	878.618	232.072	738.279	656.902	163.382	742.325	660.031	194.734	758.965	587.585	180.149	730.845	497.401	-244.625	658.731	868.676	-209.581	738.18	644.181	-147.989	746.14	662.742	-155.177	756.195	585.685	-137.183	731.061	498.209
224	2.23	3.00698	1094.67	770.516	72.109	1092.08	818.013	-68.4336	1102.59	808.703	147.729	958.378	875.395	-133.4	962.452	865.236	11.4934	910.398	807.793	255.677	640.264	878.635	232.063	738.332	656.884	163.378	742.358	660.016	194.73	758.979	587.573	180.168	730.884	497.412	-244.63	658.732	868.641	-209.59	738.225	644.188	-147.95	746.13	662.597	-155.165	756.232	585.646	-137.166	731.117	498.196
225	2.24	3.01132	1094.69	770.396	72.1101	1092.07	817.926	-68.4117	1102.6	808.674	147.724	958.384	875.378	-133.388	962.489	865.224	11.4884	910.493	807.632	255.685	640.296	878.656	232.071	738.363	656.867	163.384	742.384	659.98	194.758	758.988	587.563	180.172	730.88	497.415	-244.635	658.773	868.675	-209.578	738.269	644.163	-147.925	746.173	662.502	-155.127	756.276	585.627	-137.151	731.152	498.173
226	2.25	3.02431	1094.66	770.314	72.1315	1092.07	817.875	-68.3724	1102.6	808.586	147.741	958.377	875.344	-133.348	962.508	865.209	11.4962	910.523	807.571	255.701	640.325	878.687	232.082	738.372	656.865	163.407	742.385	659.97	194.772	758.979	587.53	180.18	730.86	497.411	-244.639	658.848	868.728	-209.545	738.282	644.102	-147.903	746.198	662.425	-155.092	756.289	585.579	-137.135	731.143	498.163
227	2.26	3.04085	1094.61	770.387	72.1329	1092.04	817.851	-68.3774	1102.58	808.534	147.757	958.369	875.363	-133.341	962.5	865.181	11.5106	910.493	807.71	255.722	640.325	878.658	232.087	738.36	656.867	163.41	742.379	659.948	194.789	758.993	587.566	180.194	730.857	497.406	-244.631	658.826	868.619	-209.548	738.274	644.098	-147.884	746.185	662.431	-155.083	756.296	585.573	-137.128	731.146	498.159
228	2.27	3.00507	1094.57	770.466	72.0959	1092	817.857	-68.4198	1102.53	808.569	147.752	958.369	875.387	-133.367	962.477	865.173	11.4841	910.482	807.843	255.743	640.304	878.616	232.08	738.328	656.884	163.387	742.362	659.947	194.759	759.014	587.567	180.182	730.838	497.421	-244.659	658.804	868.583	-209.576	738.272	644.149	-147.954	746.3	662.659	-155.113	756.292	585.624	-137.159	731.134	498.184
229	2.28	2.9788	1094.55	770.38	72.0694	1091.96	817.804	-68.4281	1102.48	808.566	147.758	958.365	875.38	-133.365	962.472	865.136	11.4661	910.504	807.916	255.744	640.279	878.607	232.078	738.297	656.883	163.391	742.346	659.969	194.755	758.989	587.561	180.183	730.811	497.417	-244.724	658.813	868.66	-209.805	738.344	643.559	-148.018	746.417	662.912	-155.346	756.783	584.724	-137.079	731.485	497.538
230	2.29	3.00379	1094.53	770.288	72.1135	1091.94	817.765	-68.3975	1102.43	808.492	147.783	958.359	875.395	-133.336	962.472	865.123	11.502	910.538	807.914	255.732	640.264	878.612	232.11	738.296	656.871	163.402	742.326	659.997	194.767	758.969	587.546	180.214	730.813	497.431	-244.717	658.781	868.634	-210.313	738.559	642.156	-147.915	746.157	662.63	-155.818	757.891	582.613	-136.877	732.329	496.038
231	2.3	3.00098	1094.52	770.257	72.1607	1091.94	817.728	-68.4002	1102.43	808.48	147.775	958.364	875.381	-133.343	962.505	865.127	11.5126	910.633	807.872	255.698	640.242	878.596	232.136	738.316	656.926	163.435	742.343	660.007	194.816	758.972	587.596	180.228	730.822	497.452	-244.73	658.77	868.604	-210.206	738.504	642.419	-147.869	746.105	662.543	-155.703	757.652	583.031	-136.908	732.16	496.349
232	2.31	2.99967	1094.55	770.136	72.1698	1091.96	817.669	-68.3937	1102.47	808.46	147.752	958.397	875.339	-133.37	962.561	865.128	11.5013	910.756	807.821	255.67	640.259	878.596	232.121	738.368	656.912	163.44	742.385	659.974	194.861	758.988	587.648	180.222	730.852	497.452	-244.746	658.829	868.654	-209.715	738.304	643.715	-147.873	746.125	662.518	-155.242	756.586	585.025	-137.076	731.375	497.775
233	2.32	3.02117	1094.56	770.068	72.1797	1091.94	817.616	-68.3662	1102.51	808.387	147.747	958.433	875.327	-133.389	962.609	865.103	11.4901	910.859	807.751	255.666	640.31	878.603	232.103	738.401	656.876	163.432	742.397	659.965	194.859	758.982	587.664	180.209	730.883	497.422	-244.717	658.837	868.618	-209.589	738.284	643.967	-147.888	746.157	662.509	-155.113	756.327	585.504	-137.118	731.211	498.089
234	2.33	3.02666	1094.54	770.119	72.1815	1091.91	817.627	-68.3522	1102.51	808.356	147.73	958.447	875.328	-133.405	962.632	865.076	11.4765	910.922	807.782	255.67	640.354	878.634	232.089	738.412	656.871	163.408	742.395	659.99	194.845	758.99	587.679	180.197	730.886	497.396	-244.734	658.838	868.598	-209.567	738.294	644.074	-147.947	746.306	662.696	-155.086	756.276	585.617	-137.14	731.182	498.158
235	2.34	3.003	1094.51	770.147	72.1587	1091.86	817.668	-68.3797	1102.52	808.376	147.698	958.443	875.298	-133.421	962.626	865.081	11.4428	910.916	807.928	255.671	640.386	878.649	232.062	738.389	656.874	163.393	742.385	660.002	194.817	758.986	587.649	180.188	730.869	497.419	-244.762	658.876	868.624	-209.576	738.275	644.141	-148.067	746.604	663.104	-155.092	756.284	585.65	-137.156	731.154	498.178
236	2.35	2.99046	1094.46	770.114	72.1489	1091.81	817.623	-68.3618	1102.51	808.359	147.698	958.42	875.315	-133.422	962.617	865.06	11.4249	910.865	808.029	255.669	640.403	878.662	232.055	738.349	656.869	163.386	742.351	660.005	194.793	758.964	587.611	180.184	730.836	497.392	-244.731	658.854	868.538	-209.56	738.241	644.137	-148.055	746.523	663.029	-155.108	756.272	585.623	-137.14	731.112	498.178
237	2.36	3.01746	1094.45	770.094	72.1509	1091.79	817.53	-68.3268	1102.47	808.336	147.711	958.389	875.288	-133.407	962.601	865.001	11.404	910.891	808.026	255.673	640.404	878.679	232.059	738.316	656.857	163.39	742.314	659.974	194.774	758.952	587.575	180.183	730.794	497.352	-244.736	658.872	868.537	-209.776	738.331	643.505	-147.931	746.235	662.582	-155.316	756.77	584.646	-137.034	731.46	497.481
238	2.37	3.04085	1094.46	770.118	72.1649	1091.77	817.552	-68.314	1102.44	808.342	147.713	958.368	875.267	-133.4	962.585	864.996	11.4008	910.899	808.132	255.665	640.369	878.668	232.072	738.286	656.908	163.391	742.297	659.987	194.737	758.964	587.505	180.187	730.776	497.392	-244.781	658.9	868.589	-210.31	738.574	642.14	-147.906	746.143	662.494	-155.795	757.898	582.547	-136.844	732.301	495.989
239	2.38	3.04484	1094.43	770.213	72.1766	1091.75	817.607	-68.3434	1102.45	808.352	147.718	958.377	875.29	-133.409	962.583	864.997	11.3891	910.923	808.163	255.658	640.331	878.653	232.074	738.271	656.94	163.369	742.292	660.022	194.702	758.967	587.486	180.193	730.775	497.413	-244.821	658.889	868.604	-210.466	738.633	641.807	-147.986	746.22	662.737	-155.924	758.172	582.058	-136.814	732.513	495.693
240	2.39	3.05857	1094.47	770.097	72.1911	1091.77	817.56	-68.3397	1102.44	808.3	147.711	958.399	875.286	-133.416	962.594	864.965	11.3884	911.03	808.052	255.629	640.3	878.623	232.067	738.299	656.918	163.367	742.3	660.028	194.688	758.961	587.499	180.199	730.796	497.404	-244.824	658.876	868.571	-210.268	738.529	642.324	-148.072	746.336	662.997	-155.749	757.718	582.883	-136.896	732.161	496.307
241	2.4	3.09525	1094.52	770.017	72.2198	1091.81	817.513	-68.3007	1102.46	808.272	147.695	958.42	875.235	-133.422	962.634	864.957	11.4072	911.127	807.99	255.601	640.296	878.613	232.055	738.339	656.886	163.369	742.337	660.023	194.7	758.963	587.515	180.2	730.835	497.397	-244.834	658.89	868.581	-209.744	738.291	643.691	-148.029	746.129	662.73	-155.277	756.586	584.939	-137.079	731.327	497.741
242	2.41	3.12659	1094.55	770.018	72.2461	1091.85	817.541	-68.2886	1102.51	808.243	147.685	958.466	875.247	-133.431	962.692	864.958	11.4261	911.212	807.943	255.571	640.293	878.619	232.05	738.373	656.887	163.369	742.389	660.01	194.738	758.976	587.545	180.206	730.864	497.407	-244.889	658.961	868.667	-209.628	738.261	644.036	-148.037	746.276	662.818	-155.147	756.321	585.458	-137.122	731.166	498.092
243	2.42	3.13946	1094.58	769.956	72.2613	1091.88	817.576	-68.2549	1102.55	808.201	147.696	958.508	875.26	-133.442	962.747	864.959	11.4294	911.299	807.925	255.545	640.307	878.634	232.032	738.414	656.846	163.38	742.439	659.947	194.806	758.988	587.587	180.197	730.89	497.368	-244.888	658.977	868.599	-209.607	738.294	644.064	-148.042	746.506	662.914	-155.095	756.266	585.591	-137.129	731.161	498.156
244	2.43	3.13056	1094.62	769.849	72.2949	1091.85	817.547	-68.2414	1102.56	808.191	147.695	958.525	875.247	-133.449	962.803	864.943	11.4376	911.384	807.895	255.554	640.343	878.653	232.031	738.424	656.839	163.363	742.461	659.875	194.856	758.998	587.617	180.2	730.899	497.346	-244.874	659.003	868.539	-209.599	738.343	644.022	-147.933	746.343	662.526	-155.053	756.271	585.582	-137.13	731.187	498.111
245	2.44	3.12311	1094.57	769.991	72.3008	1091.82	817.607	-68.2551	1102.55	808.262	147.694	958.503	875.238	-133.45	962.823	864.935	11.4068	911.388	807.969	255.583	640.373	878.678	232.042	738.417	656.88	163.361	742.426	659.921	194.869	759.024	587.639	180.209	730.885	497.354	-244.894	659.013	868.525	-209.596	738.339	644.043	-147.965	746.404	662.621	-155.047	756.284	585.57	-137.117	731.185	498.127
246	2.45	3.12453	1094.48	770.176	72.2749	1091.78	817.66	-68.2515	1102.51	808.357	147.693	958.482	875.285	-133.43	962.786	864.928	11.3831	911.319	808.142	255.614	640.388	878.674	232.053	738.347	656.922	163.375	742.365	660.002	194.843	759.004	587.68	180.219	730.844	497.388	-244.932	658.99	868.497	-209.575	738.275	644.103	-148.069	746.609	663.052	-155.073	756.268	585.616	-137.099	731.135	498.173
247	2.46	3.1475	1094.41	770.274	72.2838	1091.74	817.698	-68.2097	1102.44	808.38	147.723	958.439	875.321	-133.385	962.714	864.923	11.4178	911.236	808.33	255.653	640.406	878.693	232.082	738.269	656.972	163.401	742.299	660.059	194.832	758.99	587.69	180.232	730.792	497.416	-244.957	658.995	868.496	-209.794	738.341	643.514	-148.073	746.601	663.178	-155.29	756.748	584.686	-136.987	731.444	497.527
248	2.47	3.17731	1094.36	770.359	72.156	1091.56	818.512	-68.1726	1102.38	808.379	147.766	958.394	875.341	-133.349	962.664	864.937	11.4714	911.179	808.476	255.652	640.394	878.68	232.13	738.207	656.99	163.436	742.239	660.114	194.821	758.981	587.659	180.244	730.761	497.425	-244.968	659.01	868.492	-210.296	738.575	642.118	-148.048	746.534	663.225	-155.727	757.869	582.539	-136.773	732.224	496.088
249	2.48	3.19657	1094.37	770.409	71.9884	1091.4	819.509	-68.1604	1102.36	808.397	147.793	958.407	875.373	-133.348	962.669	864.98	11.5005	911.206	808.545	255.645	640.366	878.64	232.147	738.194	656.981	163.443	742.245	660.1	194.807	758.98	587.625	180.261	730.768	497.455	-244.953	659.021	868.466	-210.443	738.648	641.774	-147.999	746.385	663.081	-155.843	758.145	582.02	-136.717	732.399	495.752
250	2.49	3.19275	1094.45	770.32	72.2119	1091.68	818.125	-68.1833	1102.41	808.369	147.775	958.451	875.338	-133.384	962.747	864.969	11.4939	911.366	808.368	255.639	640.366	878.634	232.121	738.26	656.951	163.429	742.306	660.053	194.787	759	587.613	180.252	730.821	497.441	-244.943	659.065	868.512	-210.245	738.574	642.304	-147.941	746.143	662.676	-155.694	757.731	582.849	-136.807	732.122	496.3
251	2.5	3.15703	1094.55	770.025	72.253	1091.76	817.767	-68.2195	1102.49	808.328	147.73	958.507	875.279	-133.425	962.838	864.966	11.4547	911.534	808.083	255.622	640.382	878.632	232.07	738.369	656.865	163.392	742.378	660.013	194.774	759.002	587.588	180.235	730.882	497.403	-244.933	659.082	868.547	-209.738	738.363	643.654	-147.986	746.131	662.584	-155.239	756.618	584.908	-137.015	731.377	497.694
252	2.51	3.09559	1094.63	769.865	72.2543	1091.79	817.675	-68.2654	1102.53	808.329	147.689	958.549	875.249	-133.474	962.911	864.962	11.4086	911.601	807.985	255.597	640.39	878.622	232.023	738.442	656.803	163.321	742.448	659.89	194.742	758.981	587.537	180.19	730.924	497.334	-244.955	659.096	868.577	-209.652	738.35	643.965	-148.031	746.184	662.524	-155.122	756.322	585.409	-137.129	731.251	498.019
253	2.52	3.02859	1094.62	769.875	72.2077	1091.79	817.623	-68.324	1102.51	808.37	147.658	958.571	875.225	-133.515	962.945	864.974	11.3783	911.617	808.045	255.61	640.408	878.649	231.984	738.459	656.798	163.252	742.508	659.796	194.72	758.979	587.506	180.127	730.944	497.301	-244.968	659.069	868.517	-209.667	738.349	644.02	-148.092	746.379	662.638	-155.102	756.237	585.55	-137.192	731.232	498.094
254	2.53	3.00291	1094.59	769.923	72.1747	1091.78	817.61	-68.3515	1102.48	808.401	147.64	958.555	875.22	-133.524	962.943	864.978	11.3503	911.601	808.119	255.624	640.437	878.669	231.966	738.425	656.834	163.231	742.485	659.831	194.718	758.991	587.518	180.1	730.912	497.324	-244.99	659.069	868.49	-209.67	738.346	644.021	-148.19	746.67	663.003	-155.107	756.216	585.583	-137.192	731.21	498.103
255	2.54	3.00979	1094.5	770.161	72.1675	1091.77	817.63	-68.3409	1102.46	808.476	147.662	958.538	875.27	-133.509	962.921	865.02	11.3535	911.565	808.263	255.665	640.452	878.676	231.979	738.367	656.861	163.261	742.422	659.898	194.702	759	587.53	180.123	730.856	497.374	-244.989	659.075	868.473	-209.621	738.309	644.073	-148.173	746.683	663.12	-155.105	756.213	585.594	-137.166	731.156	498.141
256	2.55	3.04528	1094.41	770.344	72.1901	1091.75	817.706	-68.3116	1102.43	808.531	147.706	958.493	875.329	-133.446	962.877	865.027	11.3853	911.528	808.44	255.705	640.455	878.654	232.035	738.277	656.912	163.333	742.331	659.995	194.726	759.01	587.56	180.174	730.804	497.425	-244.985	659.116	868.49	-209.815	738.387	643.5	-148.075	746.52	663.022	-155.312	756.722	584.688	-137.013	731.453	497.531
257	2.56	3.09797	1094.37	770.428	72.2527	1091.72	817.716	-68.2369	1102.38	808.525	147.772	958.457	875.377	-133.367	962.808	864.968	11.4709	911.499	808.513	255.716	640.453	878.638	232.12	738.218	656.933	163.413	742.271	660.015	194.761	759.01	587.548	180.216	730.778	497.428	-244.977	659.156	868.482	-210.309	738.62	642.104	-147.877	746.191	662.584	-155.751	757.842	582.588	-136.757	732.224	496.103
258	2.57	3.16012	1094.37	770.463	72.3255	1091.72	817.745	-68.1712	1102.36	808.515	147.818	958.46	875.391	-133.324	962.789	864.933	11.5378	911.5	808.561	255.709	640.456	878.647	232.195	738.217	656.979	163.468	742.271	660.004	194.807	758.999	587.552	180.245	730.779	497.412	-244.93	659.178	868.46	-210.419	738.689	641.755	-147.784	746.061	662.424	-155.823	758.113	582.047	-136.65	732.401	495.719
259	2.58	3.19779	1094.45	770.428	72.3347	1091.77	817.785	-68.1661	1102.41	808.523	147.802	958.502	875.396	-133.346	962.841	864.946	11.5342	911.59	808.501	255.694	640.466	878.646	232.193	738.261	656.996	163.468	742.306	660.025	194.83	759.001	587.59	180.245	730.806	497.422	-244.919	659.214	868.493	-210.448	738.712	641.682	-147.796	746.044	662.424	-155.851	758.205	581.909	-136.639	732.486	495.618
260	2.59	3.1626	1094.52	770.373	72.2784	1091.83	817.761	-68.2235	1102.49	808.53	147.741	958.567	875.36	-133.417	962.935	864.99	11.4808	911.741	808.364	255.654	640.469	878.638	232.121	738.339	656.947	163.431	742.354	660.033	194.831	759.012	587.634	180.223	730.852	497.421	-244.959	659.213	868.527	-210.24	738.622	642.28	-147.875	746.119	662.507	-155.696	757.772	582.824	-136.787	732.192	496.234
261	2.6	3.09118	1094.57	770.262	72.2398	1091.86	817.758	-68.2714	1102.57	808.487	147.698	958.647	875.371	-133.491	963.024	865.026	11.4211	911.867	808.186	255.618	640.478	878.651	232.039	738.423	656.877	163.355	742.417	659.94	194.826	759.017	587.647	180.186	730.907	497.394	-244.99	659.164	868.506	-209.752	738.417	643.604	-148.016	746.327	662.712	-155.238	756.635	584.939	-137.066	731.422	497.652
262	2.61	3.05954	1094.64	770.192	72.222	1091.88	817.768	-68.3053	1102.59	808.445	147.657	958.703	875.399	-133.535	963.07	865.027	11.4054	911.942	808.147	255.619	640.511	878.663	232.007	738.471	656.836	163.283	742.468	659.842	194.843	759.01	587.666	180.146	730.955	497.346	-244.979	659.14	868.461	-209.658	738.396	643.917	-148.13	746.682	663.038	-155.114	756.336	585.478	-137.154	731.263	498.014
263	2.62	3.05854	1094.65	770.169	72.2314	1091.89	817.825	-68.3192	1102.6	808.481	147.642	958.73	875.396	-133.54	963.087	865.013	11.4026	911.977	808.187	255.642	640.549	878.684	232.002	738.475	656.799	163.262	742.5	659.806	194.861	759.004	587.661	180.127	730.959	497.306	-245.005	659.143	868.474	-209.639	738.389	644.015	-148.141	746.776	663.105	-155.073	756.254	585.597	-137.171	731.236	498.09
264	2.63	3.06897	1094.62	770.208	72.2442	1091.86	817.848	-68.3119	1102.6	808.512	147.657	958.703	875.371	-133.52	963.071	864.992	11.3962	911.972	808.243	255.666	640.577	878.702	232.013	738.44	656.828	163.278	742.476	659.824	194.869	759.002	587.659	180.137	730.912	497.319	-245.036	659.16	868.452	-209.612	738.375	644.036	-148.118	746.777	663.1	-155.06	756.244	585.599	-137.142	731.205	498.085
265	2.64	3.12868	1094.57	770.425	72.2596	1091.84	817.944	-68.2866	1102.59	808.547	147.7	958.66	875.434	-133.492	963.053	865.019	11.4024	911.937	808.368	255.708	640.603	878.727	232.046	738.376	656.887	163.335	742.39	659.964	194.827	758.994	587.626	180.178	730.836	497.392	-245.02	659.204	868.435	-209.813	738.458	643.436	-148.054	746.609	662.96	-155.258	756.778	584.62	-136.985	731.533	497.433
266	2.65	3.16614	1094.51	770.615	72.2561	1091.83	818.003	-68.2639	1102.54	808.659	147.73	958.642	875.549	-133.464	963.005	865.006	11.4387	911.906	808.526	255.751	640.63	878.744	232.093	738.305	656.945	163.381	742.327	660.071	194.786	759.005	587.64	180.202	730.804	497.426	-245.027	659.278	868.482	-210.313	738.678	642.124	-147.971	746.412	662.802	-155.727	757.926	582.52	-136.767	732.307	496.01
267	2.66	3.17906	1094.48	770.704	72.2735	1091.81	818.081	-68.2186	1102.49	808.704	147.752	958.606	875.613	-133.45	962.945	864.993	11.4647	911.879	808.678	255.769	640.625	878.727	232.14	738.254	657.002	163.412	742.296	660.09	194.763	759.005	587.621	180.219	730.781	497.437	-245.027	659.255	868.458	-210.433	738.719	641.79	-147.957	746.431	662.921	-155.836	758.143	582.048	-136.675	732.425	495.697
268	2.67	3.18535	1094.47	770.756	72.2905	1091.79	818.095	-68.2017	1102.49	808.68	147.762	958.592	875.604	-133.438	962.924	865.033	11.4691	911.89	808.713	255.747	640.599	878.68	232.165	738.231	656.989	163.433	742.273	660.075	194.768	758.989	587.555	180.228	730.777	497.41	-245.057	659.275	868.463	-210.455	738.706	641.641	-147.851	746.123	662.548	-155.862	758.184	581.933	-136.635	732.435	495.612
269	2.68	3.17681	1094.49	770.725	72.2914	1091.8	818.092	-68.2128	1102.5	808.69	147.735	958.614	875.55	-133.468	962.976	865.058	11.4591	911.977	808.567	255.721	640.611	878.68	232.137	738.263	656.912	163.427	742.272	660.034	194.764	758.98	587.527	180.212	730.797	497.384	-245.069	659.272	868.471	-210.462	738.69	641.583	-147.843	746.078	662.475	-155.876	758.223	581.869	-136.66	732.454	495.582
270	2.69	3.13367	1094.56	770.62	72.2416	1091.84	818.043	-68.2823	1102.55	808.684	147.667	958.674	875.517	-133.539	963.05	865.067	11.4144	912.081	808.509	255.696	640.647	878.692	232.043	738.342	656.819	163.366	742.323	659.98	194.744	758.999	587.514	180.163	730.838	497.358	-245.096	659.254	868.479	-210.264	738.598	642.181	-147.914	746.134	662.5	-155.711	757.759	582.761	-136.831	732.136	496.219
271	2.7	3.0865	1094.64	770.522	72.1939	1091.89	818.013	-68.3371	1102.6	808.703	147.608	958.759	875.539	-133.611	963.115	865.066	11.3644	912.234	808.51	255.67	640.651	878.698	231.965	738.421	656.815	163.279	742.421	659.884	194.735	759.023	587.557	180.115	730.888	497.34	-245.117	659.212	868.449	-209.812	738.407	643.58	-148.053	746.339	662.71	-155.286	756.604	584.944	-137.096	731.379	497.674
272	2.71	3.06699	1094.72	770.443	72.1683	1091.93	817.992	-68.3605	1102.65	808.708	147.585	958.826	875.574	-133.643	963.171	865.063	11.3271	912.396	808.428	255.68	640.654	878.687	231.948	738.491	656.798	163.225	742.522	659.799	194.735	759.045	587.566	180.087	730.951	497.312	-245.104	659.186	868.392	-209.714	738.391	643.915	-148.15	746.569	662.895	-155.171	756.315	585.521	-137.183	731.256	498.042
273	2.72	3.06287	1094.76	770.376	72.1768	1091.94	818.036	-68.3524	1102.68	808.699	147.584	958.851	875.57	-133.623	963.205	865.065	11.3329	912.463	808.382	255.708	640.678	878.686	231.984	738.508	656.821	163.217	742.562	659.763	194.762	759.062	587.569	180.115	730.974	497.326	-245.078	659.214	868.374	-209.658	738.383	643.988	-148.071	746.396	662.613	-155.098	756.272	585.599	-137.181	731.226	498.098
274	2.73	3.10662	1094.73	770.459	72.2311	1091.94	818.086	-68.3068	1102.68	808.712	147.631	958.83	875.567	-133.572	963.216	865.072	11.395	912.457	808.411	255.736	640.698	878.693	232.035	738.484	656.846	163.299	742.526	659.818	194.819	759.056	587.607	180.167	730.929	497.365	-245.083	659.301	868.441	-209.589	738.368	644.018	-147.939	746.33	662.478	-155.038	756.259	585.603	-137.102	731.183	498.108
275	2.74	3.16483	1094.65	770.653	72.2836	1091.91	818.159	-68.2574	1102.68	808.736	147.703	958.777	875.594	-133.505	963.19	865.093	11.4605	912.383	808.514	255.778	640.714	878.706	232.103	738.434	656.899	163.42	742.423	659.978	194.855	759.063	587.639	180.228	730.874	497.428	-245.045	659.328	868.423	-209.76	738.454	643.419	-147.835	746.251	662.395	-155.203	756.776	584.629	-136.913	731.493	497.453
276	2.75	3.19105	1094.57	770.804	72.3104	1091.89	818.246	-68.229	1102.65	808.76	147.729	958.726	875.633	-133.461	963.157	865.132	11.4908	912.333	808.638	255.802	640.731	878.719	232.148	738.356	656.953	163.477	742.357	660.073	194.861	759.055	587.635	180.256	730.836	497.446	-245.033	659.353	868.41	-210.247	738.693	642.06	-147.792	746.185	662.416	-155.649	757.922	582.5	-136.677	732.293	496.004
277	2.76	3.17399	1094.56	770.891	72.2971	1091.87	818.285	-68.2488	1102.61	808.865	147.737	958.705	875.662	-133.477	963.149	865.138	11.4705	912.333	808.733	255.803	640.727	878.716	232.151	738.317	656.966	163.469	742.312	660.071	194.865	759.05	587.664	180.235	730.813	497.405	-245.035	659.342	868.378	-210.388	738.741	641.727	-147.842	746.26	662.667	-155.763	758.187	582.007	-136.645	732.45	495.69
278	2.77	3.15354	1094.54	770.966	72.2683	1091.85	818.274	-68.2866	1102.59	808.894	147.721	958.694	875.628	-133.496	963.151	865.133	11.4469	912.326	808.812	255.801	640.741	878.716	232.122	738.312	656.927	163.445	742.286	660.078	194.866	759.046	587.669	180.198	730.801	497.387	-245.054	659.289	868.312	-210.449	738.726	641.649	-147.929	746.399	662.918	-155.819	758.248	581.892	-136.651	732.489	495.616
279	2.78	3.12761	1094.53	770.959	72.2314	1091.83	818.231	-68.3166	1102.59	808.88	147.687	958.718	875.605	-133.542	963.165	865.126	11.414	912.366	808.795	255.785	640.755	878.73	232.072	738.325	656.868	163.424	742.283	660.06	194.853	759.016	587.642	180.181	730.799	497.379	-245.1	659.254	868.295	-210.232	738.595	642.21	-147.937	746.325	662.747	-155.642	757.745	582.79	-136.76	732.139	496.231
280	2.79	3.09847	1094.59	770.827	72.1961	1091.87	818.178	-68.3353	1102.62	808.875	147.643	958.774	875.549	-133.609	963.231	865.118	11.3868	912.467	808.702	255.778	640.768	878.73	232.013	738.368	656.792	163.375	742.317	660.018	194.804	759.01	587.598	180.15	730.828	497.363	-245.147	659.274	868.335	-209.733	738.361	643.592	-148.097	746.597	663.102	-155.22	756.593	584.871	-136.997	731.315	497.656
281	2.8	3.06206	1094.67	770.715	72.1684	1091.92	818.172	-68.365	1102.67	808.875	147.601	958.836	875.507	-133.641	963.309	865.131	11.3482	912.594	808.605	255.777	640.773	878.701	231.971	738.44	656.785	163.32	742.415	659.94	194.747	759.034	587.573	180.113	730.88	497.326	-245.142	659.312	868.305	-209.63	738.36	643.937	-148.156	746.594	663.022	-155.121	756.333	585.399	-137.122	731.163	498.003
282	2.81	3.07196	1094.73	770.594	72.1808	1091.95	818.162	-68.3651	1102.71	808.832	147.59	958.879	875.501	-133.637	963.351	865.136	11.3446	912.681	808.509	255.79	640.792	878.698	231.958	738.471	656.772	163.282	742.485	659.872	194.724	759.034	587.534	180.113	730.905	497.308	-245.125	659.382	868.323	-209.625	738.376	644.01	-148.085	746.359	662.63	-155.089	756.273	585.525	-137.148	731.152	498.088
283	2.82	3.09999	1094.75	770.576	72.2036	1091.95	818.144	-68.3214	1102.74	808.777	147.611	958.882	875.516	-133.608	963.373	865.13	11.3638	912.732	808.465	255.792	640.796	878.69	231.997	738.467	656.789	163.311	742.466	659.904	194.726	759.018	587.51	180.144	730.897	497.328	-245.138	659.457	868.349	-209.599	738.375	644.006	-148.011	746.29	662.48	-155.07	756.265	585.513	-137.103	731.145	498.088
284	2.83	3.11611	1094.73	770.611	72.2134	1091.92	818.152	-68.288	1102.76	808.825	147.634	958.88	875.531	-133.579	963.38	865.123	11.3661	912.738	808.512	255.823	640.816	878.696	232.026	738.447	656.804	163.341	742.442	659.94	194.749	759.006	587.537	180.178	730.872	497.356	-245.144	659.453	868.291	-209.578	738.367	644.019	-147.952	746.254	662.439	-155.042	756.27	585.512	-137.059	731.147	498.088
285	2.84	3.12611	1094.67	770.732	72.2298	1091.89	818.185	-68.2739	1102.74	808.842	147.645	958.861	875.524	-133.558	963.374	865.104	11.3956	912.72	808.586	255.86	640.844	878.694	232.049	738.413	656.815	163.364	742.396	659.959	194.782	759.007	587.538	180.206	730.839	497.398	-245.165	659.467	868.254	-209.563	738.348	644.062	-147.914	746.242	662.423	-155.017	756.25	585.513	-137.03	731.092	498.096
286	2.85	3.12055	1094.61	770.839	72.2293	1091.87	818.216	-68.2829	1102.7	808.856	147.638	958.841	875.52	-133.561	963.377	865.111	11.3944	912.669	808.69	255.868	640.859	878.7	232.048	738.374	656.82	163.364	742.362	659.949	194.773	758.999	587.527	180.19	730.809	497.387	-245.196	659.474	868.249	-209.553	738.326	644.069	-147.949	746.337	662.602	-155.013	756.217	585.525	-137.014	731.035	498.112
287	2.86	3.10503	1094.58	770.954	72.2272	1091.85	818.268	-68.3011	1102.68	808.951	147.625	958.838	875.552	-133.569	963.377	865.142	11.3711	912.656	808.769	255.879	640.886	878.703	232.034	738.345	656.81	163.364	742.328	659.969	194.777	759.032	587.577	180.171	730.799	497.388	-245.222	659.474	868.246	-209.559	738.302	644.068	-148.063	746.592	663.046	-155.044	756.234	585.565	-137.012	731.01	498.144
288	2.87	3.11911	1094.56	771.019	72.2311	1091.84	818.301	-68.3098	1102.66	808.997	147.622	958.85	875.606	-133.585	963.384	865.183	11.3585	912.669	808.858	255.876	640.916	878.721	232.046	738.338	656.826	163.37	742.315	659.995	194.794	759.055	587.61	180.162	730.808	497.399	-245.242	659.467	868.257	-209.547	738.278	644.089	-148.091	746.648	663.226	-155.058	756.233	585.58	-136.996	730.998	498.157
289	2.88	3.14868	1094.57	770.998	72.2645	1091.85	818.313	-68.2741	1102.67	808.964	147.638	958.859	875.625	-133.583	963.398	865.184	11.39	912.717	808.857	255.861	640.923	878.711	232.062	738.356	656.826	163.392	742.338	659.989	194.829	759.032	587.624	180.175	730.81	497.369	-245.252	659.48	868.276	-209.778	738.378	643.488	-148.044	746.534	663.089	-155.248	756.724	584.61	-136.904	731.372	497.518
290	2.89	3.19927	1094.65	770.909	72.2865	1091.9	818.292	-68.2374	1102.72	808.878	147.655	958.882	875.599	-133.577	963.445	865.171	11.4158	912.833	808.739	255.856	640.937	878.73	232.077	738.398	656.811	163.406	742.377	659.974	194.848	759.025	587.63	180.199	730.834	497.363	-245.233	659.511	868.286	-210.299	738.652	642.092	-147.925	746.264	662.662	-155.684	757.886	582.453	-136.725	732.253	496.041
291	2.9	3.2187	1094.76	770.797	72.2969	1091.97	818.289	-68.2206	1102.79	808.862	147.656	958.94	875.615	-133.585	963.523	865.203	11.4218	912.958	808.697	255.869	640.96	878.745	232.089	738.467	656.833	163.403	742.434	659.979	194.835	759.06	587.656	180.202	730.88	497.383	-245.222	659.592	868.308	-210.178	738.669	642.388	-147.924	746.246	662.596	-155.585	757.711	582.914	-136.764	732.153	496.317
292	2.91	3.19318	1094.82	770.74	72.2869	1092.01	818.259	-68.2247	1102.85	808.864	147.64	959.008	875.664	-133.591	963.584	865.215	11.4101	913.075	808.674	255.868	640.961	878.715	232.074	738.507	656.842	163.393	742.482	659.979	194.813	759.076	587.657	180.193	730.912	497.382	-245.228	659.637	868.349	-209.689	738.466	643.658	-147.944	746.282	662.552	-155.151	756.649	584.922	-136.941	731.404	497.652
293	2.92	3.19436	1094.83	770.677	72.2969	1091.99	818.241	-68.2233	1102.85	808.836	147.617	959.025	875.629	-133.604	963.6	865.154	11.3669	913.181	808.457	255.864	640.963	878.699	232.05	738.508	656.785	163.366	742.489	659.911	194.809	759.046	587.629	180.175	730.909	497.34	-245.235	659.662	868.339	-209.579	738.413	643.9	-147.933	746.296	662.427	-155.031	756.363	585.345	-137	731.234	497.936
294	2.93	3.16733	1094.79	770.744	72.288	1091.95	818.274	-68.2309	1102.82	808.833	147.602	959	875.596	-133.608	963.583	865.122	11.3215	913.205	808.415	255.891	640.973	878.698	232.034	738.493	656.77	163.341	742.473	659.862	194.801	759.022	587.568	180.157	730.877	497.317	-245.256	659.666	868.328	-209.585	738.402	643.945	-147.98	746.427	662.512	-155.002	756.272	585.405	-137.028	731.154	498.009
295	2.94	3.12473	1094.73	770.893	72.251	1091.9	818.31	-68.2762	1102.79	808.911	147.571	958.985	875.62	-133.624	963.567	865.151	11.2651	913.166	808.563	255.926	640.998	878.71	231.994	738.452	656.786	163.304	742.443	659.864	194.785	759.016	587.529	180.14	730.83	497.325	-245.303	659.661	868.314	-209.597	738.38	643.985	-148.11	746.689	662.908	-155.014	756.239	585.508	-137.064	731.122	498.072
296	2.95	3.09323	1094.67	771.01	72.207	1091.88	818.353	-68.2976	1102.77	808.935	147.545	958.97	875.604	-133.651	963.558	865.144	11.2162	913.113	808.661	255.935	641.033	878.759	231.966	738.406	656.778	163.259	742.388	659.876	194.735	759.009	587.503	180.125	730.795	497.337	-245.338	659.648	868.299	-209.6	738.35	643.992	-148.161	746.727	663.03	-155.06	756.21	585.535	-137.073	731.092	498.093
297	2.96	3.11934	1094.66	771.059	72.2088	1091.87	818.364	-68.2797	1102.78	808.95	147.553	958.965	875.599	-133.651	963.573	865.13	11.2473	913.074	808.76	255.91	641.053	878.747	231.971	738.376	656.778	163.279	742.33	659.922	194.681	759.026	587.503	180.134	730.785	497.355	-245.302	659.644	868.221	-209.814	738.441	643.375	-148.177	746.714	663.111	-155.284	756.728	584.558	-136.989	731.41	497.457
298	2.97	3.16212	1094.69	771.084	72.2544	1091.88	818.445	-68.2549	1102.78	809.022	147.594	958.963	875.648	-133.63	963.595	865.171	11.3358	913.052	808.874	255.887	641.068	878.745	232.001	738.376	656.823	163.332	742.337	659.989	194.679	759.032	587.505	180.151	730.8	497.373	-245.269	659.644	868.171	-210.337	738.701	642.016	-148.092	746.553	662.988	-155.724	757.9	582.484	-136.765	732.242	496.014
299	2.98	3.21786	1094.75	771.075	72.3128	1091.93	818.438	-68.2011	1102.82	809.039	147.638	958.967	875.661	-133.601	963.62	865.217	11.4154	913.087	808.933	255.87	641.074	878.753	232.07	738.404	656.885	163.38	742.367	659.985	194.726	759.039	587.517	180.18	730.831	497.361	-245.287	659.715	868.25	-210.455	738.785	641.711	-147.944	746.272	662.584	-155.805	758.208	581.975	-136.674	732.456	495.655
300	2.99	3.28124	1094.81	770.97	72.3637	1091.99	818.407	-68.1543	1102.86	808.997	147.628	958.883	875.565	-133.573	963.642	865.193	11.4547	913.206	808.806	255.865	641.077	878.768	232.094	738.453	656.829	163.415	742.409	659.963	194.779	759.053	587.55	180.216	730.858	497.331	-245.271	659.737	868.254	-210.219	738.696	642.228	-147.882	746.216	662.457	-155.587	757.775	582.736	-136.685	732.146	496.138
301	3	3.29768	1094.86	770.906	72.3845	1092.01	818.446	-68.143	1102.89	808.995	147.566	958.804	875.551	-133.574	963.666	865.179	11.4482	913.325	808.7	255.876	641.073	878.758	232.071	738.504	656.789	163.419	742.431	659.956	194.811	759.048	587.569	180.243	730.867	497.363	-245.279	659.739	868.266	-209.698	738.445	643.566	-147.892	746.222	662.444	-155.111	756.648	584.782	-136.868	731.321	497.563
302	3.01	3.23561	1094.88	770.95	72.3398	1092.02	818.461	-68.1789	1102.9	809.065	147.608	959.015	875.667	-133.605	963.691	865.211	11.384	913.42	808.635	255.925	641.084	878.736	232.036	738.53	656.806	163.366	742.476	659.928	194.817	759.053	587.587	180.214	730.858	497.39	-245.32	659.698	868.242	-209.605	738.393	643.913	-147.989	746.391	662.644	-155.04	756.347	585.384	-136.964	731.15	497.948
303	3.02	3.18532	1094.9	771.009	72.2991	1092.02	818.457	-68.2065	1102.9	809.104	147.593	959.084	875.683	-133.629	963.703	865.218	11.2841	913.516	808.473	255.968	641.075	878.713	231.999	738.525	656.815	163.297	742.48	659.847	194.797	759.051	587.603	180.182	730.841	497.364	-245.334	659.677	868.211	-209.597	738.392	643.967	-148.113	746.719	663.018	-155.031	756.261	585.545	-137.025	731.124	498.028
304	3.03	3.18677	1094.86	771.03	72.2887	1091.98	818.457	-68.2009	1102.91	809.058	147.581	959.108	875.683	-133.615	963.706	865.207	11.2635	913.551	808.347	256	641.118	878.747	231.984	738.505	656.778	163.277	742.477	659.82	194.79	759.022	587.613	180.179	730.82	497.366	-245.305	659.644	868.125	-209.598	738.388	643.948	-148.128	746.796	663.052	-155.007	756.211	585.544	-137.044	731.13	498.021
305	3.04	3.20683	1094.85	771.063	72.3073	1091.96	818.494	-68.1835	1102.92	809.069	147.594	959.113	875.711	-133.606	963.715	865.228	11.2812	913.53	808.456	256.013	641.192	878.799	231.981	738.501	656.762	163.277	742.439	659.871	194.788	758.999	587.614	180.181	730.807	497.375	-245.329	659.68	868.173	-209.589	738.386	643.946	-148.155	746.792	663.108	-154.993	756.205	585.511	-137.033	731.108	498.028
306	3.05	3.23127	1094.86	771.107	72.3274	1091.97	818.516	-68.1735	1102.93	809.107	147.614	959.104	875.713	-133.611	963.743	865.244	11.2965	913.492	808.528	256.015	641.24	878.791	232	738.503	656.769	163.292	742.399	659.918	194.768	759.016	587.609	180.178	730.817	497.362	-245.35	659.779	868.25	-209.557	738.385	643.968	-148.103	746.646	662.987	-155.001	756.244	585.515	-136.989	731.074	498.013
307	3.06	3.25627	1094.89	771.058	72.3632	1091.97	818.516	-68.1186	1102.95	809.085	147.646	959.084	875.667	-133.611	963.761	865.213	11.3712	913.442	808.609	256.004	641.271	878.784	232.03	738.505	656.77	163.324	742.396	659.924	194.734	759.021	587.555	180.179	730.84	497.353	-245.323	659.865	868.278	-209.764	738.506	643.35	-147.976	746.339	662.569	-155.204	756.777	584.548	-136.869	731.435	497.358
308	3.07	3.281	1094.9	771.09	72.3879	1091.97	818.526	-68.0672	1102.95	809.088	147.67	959.087	875.659	-133.588	963.755	865.213	11.4356	913.373	808.682	255.984	641.295	878.782	232.045	738.479	656.755	163.369	742.39	659.962	194.696	759.022	587.498	180.18	730.842	497.326	-245.32	659.916	868.278	-210.299	738.773	641.955	-147.902	746.214	662.468	-155.672	757.9	582.438	-136.668	732.252	495.957
309	3.08	3.27345	1094.89	771.111	72.402	1091.97	818.533	-68.0738	1102.93	809.189	147.657	959.086	875.67	-133.589	963.748	865.237	11.4388	913.308	808.795	255.994	641.298	878.768	232.059	738.456	656.764	163.383	742.377	659.992	194.684	759.018	587.488	180.177	730.826	497.334	-245.363	659.922	868.277	-210.459	738.829	641.677	-147.893	746.16	662.473	-155.805	758.165	581.948	-136.62	732.413	495.668
310	3.09	3.26884	1094.89	771.143	72.3931	1091.98	818.511	-68.1201	1102.92	809.195	147.656	959.074	875.63	-133.622	963.755	865.232	11.3945	913.31	808.791	256.019	641.272	878.738	232.032	738.453	656.742	163.368	742.359	659.963	194.668	759.026	587.441	180.154	730.812	497.324	-245.415	659.861	868.234	-210.517	738.818	641.591	-147.962	746.29	662.633	-155.85	758.246	581.813	-136.647	732.444	495.592
311	3.1	3.23343	1094.92	771.111	72.3627	1091.98	818.472	-68.1556	1102.94	809.15	147.644	959.093	875.546	-133.627	963.776	865.203	11.3267	913.453	808.524	256.059	641.239	878.688	231.997	738.468	656.691	163.346	742.386	659.906	194.661	759.023	587.446	180.16	730.806	497.305	-245.463	659.819	868.191	-210.301	738.671	642.125	-148.11	746.604	663.009	-155.666	757.751	582.705	-136.794	732.095	496.198
312	3.11	3.19012	1094.96	771.032	72.3345	1091.99	818.468	-68.1598	1102.96	809.159	147.62	959.129	875.554	-133.627	963.8	865.188	11.2437	913.613	808.265	256.103	641.237	878.661	231.965	738.495	656.709	163.281	742.421	659.872	194.679	759.016	587.487	180.144	730.809	497.334	-245.501	659.824	868.222	-209.792	738.443	643.476	-148.195	746.722	663.109	-155.206	756.578	584.839	-137.025	731.296	497.61
313	3.12	3.19099	1095.01	770.98	72.3315	1092.01	818.482	-68.1461	1103	809.199	147.609	959.17	875.573	-133.611	963.842	865.185	11.2161	913.714	808.186	256.151	641.239	878.664	231.957	738.523	656.733	163.224	742.485	659.805	194.692	759.015	587.516	180.133	730.819	497.356	-245.497	659.862	868.224	-209.689	738.437	643.824	-148.167	746.685	662.923	-155.081	756.293	585.37	-137.071	731.17	497.928
314	3.13	3.23109	1095.06	770.846	72.3595	1092.02	818.434	-68.1144	1103.06	809.132	147.645	959.194	875.558	-133.58	963.892	865.179	11.2237	913.812	807.989	256.187	641.259	878.699	231.976	738.542	656.716	163.236	742.54	659.761	194.718	759.004	587.537	180.159	730.84	497.355	-245.444	659.917	868.205	-209.63	738.464	643.898	-148.045	746.478	662.483	-154.995	756.256	585.45	-137.036	731.169	497.946
315	3.14	3.30308	1095.05	770.877	72.4231	1092.04	818.422	-68.0414	1103.1	809.025	147.68	959.209	875.535	-133.546	963.935	865.183	11.2924	913.822	807.966	256.188	641.318	878.746	232.028	738.566	656.706	163.301	742.528	659.79	194.734	758.997	587.541	180.204	730.859	497.346	-245.379	659.987	868.173	-209.553	738.466	643.907	-147.964	746.422	662.359	-154.942	756.279	585.448	-136.962	731.159	497.946
316	3.15	3.34096	1094.99	771.022	72.4709	1092.05	818.456	-67.9959	1103.1	809.039	147.71	959.203	875.543	-133.528	963.968	865.212	11.3747	913.762	808.126	256.167	641.388	878.783	232.048	738.577	656.718	163.36	742.502	659.88	194.77	759.024	587.59	180.227	730.869	497.373	-245.401	660.084	868.242	-209.499	738.459	643.958	-147.898	746.379	662.353	-154.929	756.3	585.49	-136.912	731.119	497.986
317	3.16	3.37592	1094.95	771.105	72.4972	1092.03	818.531	-67.9855	1103.07	809.138	147.742	959.179	875.56	-133.523	963.989	865.221	11.44	913.618	808.362	256.122	641.413	878.791	232.068	738.558	656.729	163.414	742.453	659.952	194.793	759.05	587.611	180.221	730.858	497.37	-245.456	660.11	868.271	-209.722	738.556	643.375	-147.847	746.324	662.355	-155.136	756.818	584.551	-136.79	731.444	497.399
318	3.17	3.38425	1094.91	771.16	72.5177	1091.97	818.549	-67.9946	1103.02	809.207	147.751	959.149	875.551	-133.532	963.978	865.222	11.4482	913.517	808.484	256.102	641.396	878.764	232.075	738.516	656.712	163.44	742.395	659.942	194.796	759.051	587.586	180.204	730.827	497.302	-245.523	660.087	868.211	-210.264	738.789	641.96	-147.886	746.38	662.561	-155.598	757.92	582.416	-136.593	732.218	495.999
319	3.18	3.362	1094.86	771.227	72.4994	1091.94	818.555	-68.0203	1102.96	809.247	147.729	959.126	875.55	-133.561	963.97	865.231	11.4323	913.463	808.523	256.088	641.36	878.715	232.05	738.456	656.703	163.441	742.371	659.949	194.79	759.063	587.576	180.181	730.792	497.283	-245.604	660.037	868.175	-210.438	738.822	641.62	-148.022	746.596	663.047	-155.745	758.167	581.914	-136.592	732.376	495.678
320	3.19	3.31369	1094.85	771.273	72.4664	1091.91	818.597	-68.0652	1102.93	809.276	147.701	959.126	875.569	-133.583	963.979	865.247	11.3941	913.466	808.568	256.092	641.343	878.701	232.028	738.428	656.755	163.397	742.378	659.957	194.758	759.06	587.595	180.169	730.77	497.313	-245.673	660.006	868.152	-210.271	738.702	642.174	-148.107	746.656	663.193	-155.609	757.714	582.763	-136.722	732.042	496.243
321	3.2	3.29973	1094.88	771.194	72.4466	1091.93	818.56	-68.0724	1102.96	809.252	147.674	959.156	875.56	-133.58	964.005	865.23	11.3569	913.561	808.439	256.117	641.319	878.685	232.021	738.464	656.755	163.345	742.398	659.899	194.729	759.04	587.564	180.168	730.769	497.315	-245.668	660.03	868.115	-209.767	738.446	643.531	-148.119	746.569	663.044	-155.16	756.544	584.845	-136.922	731.24	497.654
322	3.21	3.31632	1094.96	771.078	72.4377	1091.97	818.492	-68.0661	1103.04	809.175	147.671	959.213	875.553	-133.577	964.04	865.193	11.3144	913.742	808.122	256.153	641.331	878.697	232.018	738.522	656.705	163.331	742.454	659.823	194.699	759.028	587.535	180.182	730.806	497.334	-245.658	660.094	868.109	-209.642	738.431	643.835	-148.069	746.348	662.613	-155.034	756.271	585.323	-136.966	731.099	497.943
323	3.22	3.33171	1095.05	770.968	72.4456	1092.01	818.494	-68.0482	1103.09	809.129	147.67	959.272	875.572	-133.58	964.078	865.193	11.2718	913.887	807.9	256.173	641.351	878.713	232.008	738.577	656.697	163.305	742.523	659.8	194.687	759.021	587.505	180.181	730.843	497.324	-245.64	660.19	868.174	-209.618	738.48	643.895	-148.064	746.333	662.45	-154.982	756.257	585.403	-136.978	731.129	498
324	3.23	3.3451	1095.1	770.899	72.4554	1092.02	818.496	-68.0105	1103.13	809.103	147.669	959.298	875.573	-133.57	964.116	865.175	11.2745	913.961	807.76	256.156	641.394	878.729	232	738.591	656.691	163.288	742.549	659.825	194.675	759.009	587.474	180.181	730.863	497.309	-245.633	660.286	868.252	-209.595	738.51	643.876	-148.067	746.358	662.398	-154.946	756.282	585.388	-136.971	731.157	497.976
325	3.24	3.34977	1095.07	770.971	72.4426	1092.02	818.483	-67.9854	1103.14	809.073	147.665	959.288	875.551	-133.571	964.133	865.162	11.2781	913.957	807.719	256.145	641.446	878.771	231.988	738.582	656.669	163.299	742.507	659.849	194.64	759.01	587.45	180.18	730.849	497.288	-245.62	660.299	868.217	-209.572	738.501	643.847	-148.059	746.358	662.39	-154.944	756.281	585.383	-136.957	731.147	497.975
326	3.25	3.3182	1095.02	771.073	72.4377	1092	818.507	-68.0116	1103.14	809.137	147.645	959.271	875.546	-133.597	964.152	865.208	11.248	913.88	807.884	256.155	641.469	878.781	231.974	738.569	656.666	163.285	742.468	659.845	194.631	759.032	587.429	180.15	730.838	497.293	-245.653	660.268	868.18	-209.565	738.482	643.894	-148.087	746.475	662.563	-154.966	756.28	585.428	-136.963	731.121	497.986
327	3.26	3.30638	1094.97	771.169	72.4277	1091.96	818.581	-68.0596	1103.12	809.191	147.63	959.246	875.563	-133.628	964.173	865.241	11.2422	913.784	808.077	256.161	641.48	878.776	231.955	738.535	656.651	163.31	742.443	659.836	194.641	759.064	587.422	180.124	730.822	497.294	-245.69	660.226	868.14	-209.812	738.581	643.321	-148.173	746.711	663.009	-155.193	756.791	584.52	-136.883	731.425	497.405
328	3.27	3.3181	1094.93	771.239	72.4599	1091.95	818.624	-68.0682	1103.08	809.222	147.642	959.212	875.573	-133.62	964.152	865.233	11.2787	913.686	808.251	256.16	641.477	878.737	231.966	738.482	656.656	163.351	742.386	659.882	194.67	759.069	587.461	180.14	730.784	497.269	-245.731	660.172	868.081	-210.348	738.796	641.96	-148.179	746.744	663.117	-155.652	757.917	582.422	-136.709	732.191	495.985
329	3.28	3.34505	1094.91	771.257	72.4877	1091.93	818.641	-68.0362	1103.05	809.275	147.669	959.199	875.594	-133.594	964.113	865.216	11.3067	913.68	808.27	256.176	641.458	878.713	232.027	738.464	656.707	163.385	742.362	659.906	194.729	759.047	587.539	180.165	730.754	497.264	-245.776	660.137	868.062	-210.473	738.828	641.601	-148.137	746.745	663.124	-155.757	758.18	581.914	-136.64	732.361	495.618
330	3.29	3.37483	1094.95	771.238	72.4893	1091.95	818.628	-68.0169	1103.06	809.282	147.679	959.212	875.58	-133.574	964.111	865.217	11.3421	913.746	808.206	256.212	641.429	878.711	232.066	738.469	656.739	163.413	742.372	659.931	194.774	759.059	587.579	180.195	730.751	497.296	-245.751	660.159	868.062	-210.495	738.86	641.551	-148.068	746.634	662.967	-155.778	758.269	581.77	-136.617	732.431	495.533
331	3.3	3.37451	1095	771.157	72.4931	1092	818.626	-68.0092	1103.09	809.254	147.701	959.25	875.584	-133.556	964.144	865.205	11.3666	913.851	808.026	256.243	641.396	878.691	232.083	738.496	656.772	163.406	742.415	659.922	194.771	759.066	587.595	180.222	730.776	497.337	-245.724	660.223	868.078	-210.256	738.771	642.139	-147.972	746.372	662.555	-155.565	757.796	582.656	-136.683	732.13	496.142
332	3.31	3.37856	1095.08	771.063	72.5013	1092.05	818.627	-67.9936	1103.13	809.216	147.7	959.311	875.591	-133.545	964.187	865.224	11.373	913.942	807.848	256.245	641.426	878.697	232.09	738.551	656.778	163.387	742.478	659.919	194.741	759.057	587.589	180.251	730.816	497.358	-245.708	660.305	868.101	-209.708	738.54	643.453	-147.955	746.329	662.427	-155.074	756.664	584.753	-136.837	731.342	497.545
333	3.32	3.35647	1095.13	771.056	72.4832	1092.09	818.624	-67.9875	1103.18	809.187	147.675	959.36	875.591	-133.558	964.226	865.227	11.3449	914.021	807.719	256.252	641.473	878.704	232.079	738.597	656.711	163.389	742.537	659.868	194.737	759.038	587.59	180.253	730.854	497.357	-245.698	660.379	868.152	-209.586	738.522	643.789	-147.943	746.349	662.355	-154.937	756.389	585.26	-136.891	731.189	497.881
334	3.33	3.30821	1095.14	771.018	72.4543	1092.1	818.573	-68.0238	1103.19	809.191	147.646	959.374	875.556	-133.582	964.244	865.213	11.3179	914.054	807.694	256.263	641.54	878.735	232.053	738.624	656.672	163.372	742.551	659.829	194.751	759.031	587.57	180.233	730.872	497.32	-245.698	660.395	868.159	-209.561	738.519	643.878	-148.007	746.526	662.5	-154.896	756.308	585.392	-136.924	731.165	497.968
335	3.34	3.26755	1095.07	771.11	72.3991	1092.07	818.537	-68.0791	1103.16	809.242	147.618	959.354	875.54	-133.61	964.247	865.238	11.2649	914.024	807.707	256.252	641.588	878.769	232.015	738.599	656.642	163.338	742.535	659.784	194.738	759.044	587.519	180.18	730.856	497.27	-245.726	660.356	868.13	-209.577	738.501	643.878	-148.134	746.792	662.911	-154.912	756.257	585.414	-136.94	731.123	497.98
336	3.35	3.18789	1095.01	771.219	72.338	1092.03	818.526	-68.1436	1103.13	809.319	147.578	959.335	875.517	-133.665	964.227	865.244	11.1928	913.919	807.856	256.222	641.6	878.757	231.948	738.564	656.603	163.304	742.483	659.811	194.7	759.057	587.484	180.122	730.819	497.259	-245.797	660.306	868.128	-209.606	738.461	643.864	-148.184	746.815	663.008	-154.962	756.23	585.405	-136.976	731.077	497.993
337	3.36	3.14441	1094.97	771.369	72.297	1092.03	818.585	-68.1974	1103.11	809.42	147.544	959.32	875.518	-133.704	964.215	865.271	11.1559	913.833	807.957	256.224	641.605	878.743	231.91	738.54	656.599	163.285	742.432	659.866	194.654	759.064	587.486	180.096	730.787	497.276	-245.836	660.273	868.144	-209.622	738.443	643.905	-148.226	746.776	663.095	-155.009	756.214	585.465	-137.011	731.039	498.052
338	3.37	3.13744	1094.98	771.441	72.2974	1092.04	818.622	-68.2123	1103.1	809.434	147.565	959.301	875.496	-133.696	964.205	865.244	11.1683	913.791	807.942	256.258	641.602	878.732	231.934	738.53	656.633	163.302	742.407	659.894	194.619	759.071	587.474	180.119	730.785	497.281	-245.813	660.269	868.137	-209.83	738.531	643.345	-148.229	746.748	663.19	-155.229	756.747	584.545	-136.921	731.373	497.454
339	3.38	3.16888	1095.03	771.405	72.3291	1092.06	818.63	-68.1805	1103.13	809.36	147.601	959.291	875.477	-133.648	964.18	865.19	11.2317	913.781	807.901	256.292	641.57	878.69	232.003	738.52	656.648	163.333	742.408	659.877	194.632	759.06	587.466	180.163	730.788	497.286	-245.775	660.265	868.126	-210.105	738.654	642.557	-148.151	746.607	663.013	-155.463	757.399	583.321	-136.789	731.81	496.657
340	3.39	3.20667	1095.11	771.335	72.3726	1092.13	818.596	-68.1401	1103.15	809.33	147.637	959.303	875.457	-133.598	964.172	865.173	11.2989	913.845	807.8	256.307	641.55	878.69	232.059	738.529	656.666	163.388	742.451	659.857	194.647	759.044	587.438	180.203	730.804	497.291	-245.74	660.278	868.131	-209.907	738.576	642.972	-148.026	746.341	662.578	-155.28	757.034	583.949	-136.798	731.585	497.037
341	3.4	3.21729	1095.16	771.258	72.395	1092.17	818.589	-68.1088	1103.18	809.297	147.658	959.338	875.474	-133.569	964.176	865.195	11.3328	913.868	807.702	256.325	641.557	878.717	232.081	738.54	656.676	163.407	742.483	659.841	194.653	759.039	587.429	180.225	730.816	497.302	-245.736	660.336	868.168	-210.331	738.815	641.855	-147.975	746.274	662.456	-155.64	757.981	582.258	-136.635	732.305	495.821
342	3.41	3.20537	1095.17	771.228	72.3748	1092.17	818.614	-68.1141	1103.19	809.253	147.657	959.364	875.459	-133.588	964.169	865.172	11.3111	913.836	807.724	256.337	641.554	878.716	232.066	738.543	656.651	163.406	742.479	659.799	194.648	759.014	587.421	180.233	730.815	497.305	-245.74	660.348	868.164	-210.202	738.77	642.165	-147.969	746.257	662.42	-155.527	757.721	582.743	-136.678	732.108	496.158
343	3.42	3.16527	1095.2	771.242	72.3222	1092.16	818.605	-68.1604	1103.17	809.293	147.615	959.373	875.434	-133.635	964.173	865.169	11.2513	913.799	807.746	256.333	641.602	878.703	232.035	738.556	656.642	163.377	742.478	659.797	194.666	759.032	587.452	180.19	730.812	497.286	-245.779	660.299	868.12	-209.737	738.532	643.496	-148.045	746.407	662.61	-155.11	756.631	584.766	-136.881	731.317	497.556
344	3.43	3.12459	1095.22	771.31	72.2932	1092.18	818.582	-68.2028	1103.18	809.376	147.572	959.37	875.418	-133.665	964.186	865.164	11.198	913.767	807.716	256.332	641.677	878.716	231.993	738.587	656.633	163.35	742.494	659.846	194.695	759.057	587.506	180.145	730.821	497.274	-245.824	660.293	868.14	-209.65	738.492	643.783	-148.161	746.736	662.981	-155.012	756.36	585.273	-136.95	731.147	497.911
345	3.44	3.09707	1095.23	771.262	72.2752	1092.19	818.571	-68.2079	1103.19	809.366	147.552	959.38	875.396	-133.674	964.189	865.155	11.1818	913.765	807.694	256.337	641.694	878.725	231.963	738.609	656.589	163.327	742.513	659.81	194.726	759.057	587.541	180.138	730.825	497.277	-245.827	660.264	868.107	-209.618	738.498	643.823	-148.195	746.83	663.069	-154.965	756.289	585.414	-136.956	731.095	497.997
346	3.45	3.1002	1095.23	771.231	72.2816	1092.18	818.594	-68.2032	1103.19	809.35	147.547	959.384	875.393	-133.671	964.181	865.132	11.213	913.792	807.594	256.338	641.699	878.745	231.969	738.611	656.566	163.331	742.529	659.769	194.755	759.065	587.553	180.144	730.822	497.29	-245.839	660.232	868.084	-209.596	738.499	643.854	-148.163	746.855	663.073	-154.928	756.269	585.447	-136.938	731.093	497.996
347	3.46	3.12838	1095.21	771.219	72.289	1092.19	818.59	-68.1991	1103.19	809.332	147.561	959.377	875.401	-133.668	964.183	865.146	11.2508	913.788	807.605	256.364	641.675	878.732	231.99	738.627	656.595	163.359	742.529	659.806	194.761	759.072	587.555	180.172	730.838	497.323	-245.844	660.232	868.08	-209.586	738.507	643.888	-148.083	746.758	662.862	-154.926	756.278	585.406	-136.935	731.109	497.983
348	3.47	3.14014	1095.18	771.29	72.2919	1092.19	818.596	-68.2097	1103.18	809.286	147.578	959.374	875.434	-133.649	964.169	865.154	11.2627	913.766	807.613	256.412	641.633	878.699	232.021	738.627	656.628	163.399	742.522	659.87	194.749	759.057	587.575	180.19	730.832	497.338	-245.81	660.249	868.081	-209.571	738.505	643.908	-148	746.487	662.511	-154.927	756.277	585.424	-136.93	731.078	498.007
349	3.48	3.13947	1095.15	771.364	72.2946	1092.19	818.611	-68.2264	1103.14	809.296	147.6	959.35	875.477	-133.625	964.135	865.15	11.3196	913.69	807.731	256.454	641.575	878.629	232.063	738.596	656.655	163.427	742.508	659.903	194.743	759.041	587.584	180.216	730.813	497.361	-245.796	660.248	868.066	-209.791	738.587	643.281	-147.966	746.347	662.475	-155.142	756.783	584.522	-136.843	731.404	497.405
350	3.49	3.15093	1095.08	771.387	72.2778	1092.14	818.599	-68.2334	1103.1	809.303	147.635	959.295	875.514	-133.604	964.082	865.157	11.3563	913.506	807.88	256.466	641.527	878.579	232.1	738.529	656.699	163.433	742.446	659.923	194.737	759.018	587.563	180.232	730.781	497.362	-245.817	660.239	868.116	-210.334	738.783	641.917	-147.966	746.23	662.482	-155.621	757.909	582.397	-136.655	732.207	495.966
351	3.5	3.11651	1095.01	771.399	72.251	1092.1	818.592	-68.2536	1103.05	809.31	147.622	959.221	875.492	-133.628	964.023	865.15	11.3434	913.385	807.938	256.463	641.501	878.59	232.099	738.472	656.703	163.429	742.398	659.901	194.692	758.992	587.489	180.214	730.751	497.362	-245.81	660.161	868.091	-210.483	738.811	641.569	-147.992	746.155	662.485	-155.752	758.16	581.86	-136.632	732.355	495.637
352	3.51	3.06832	1095	771.425	72.223	1092.09	818.541	-68.292	1103.04	809.278	147.601	959.199	875.49	-133.659	964.001	865.158	11.3083	913.349	807.979	256.46	641.515	878.638	232.069	738.465	656.672	163.39	742.402	659.862	194.665	758.992	587.465	180.176	730.752	497.309	-245.798	660.107	868.053	-210.276	738.707	642.11	-148.036	746.3	662.62	-155.592	757.708	582.698	-136.713	732.014	496.204
353	3.52	3.02406	1095.02	771.354	72.1922	1092.11	818.503	-68.3391	1103.05	809.265	147.565	959.229	875.489	-133.675	964.034	865.173	11.2728	913.416	807.856	256.437	641.553	878.68	232.037	738.506	656.659	163.351	742.436	659.817	194.639	759.024	587.469	180.137	730.78	497.265	-245.785	660.103	868.062	-209.763	738.48	643.482	-148.109	746.526	662.812	-155.148	756.597	584.779	-136.885	731.254	497.594
354	3.53	2.98155	1095.08	771.19	72.1701	1092.15	818.477	-68.345	1103.06	809.237	147.531	959.278	875.473	-133.686	964.067	865.143	11.2393	913.512	807.642	256.407	641.618	878.711	231.999	738.572	656.608	163.308	742.498	659.761	194.641	759.044	587.455	180.129	730.819	497.257	-245.783	660.109	868.091	-209.648	738.472	643.787	-148.054	746.405	662.487	-155.03	756.345	585.267	-136.934	731.134	497.897
355	3.54	2.96342	1095.14	771.045	72.1525	1092.17	818.452	-68.3387	1103.07	809.176	147.524	959.314	875.464	-133.684	964.09	865.093	11.2301	913.566	807.508	256.392	641.651	878.718	231.971	738.624	656.532	163.294	742.571	659.723	194.658	759.055	587.444	180.118	730.864	497.236	-245.776	660.18	868.178	-209.623	738.505	643.811	-148.031	746.419	662.354	-154.989	756.301	585.397	-136.961	731.144	497.96
356	3.55	2.94919	1095.2	770.949	72.1553	1092.21	818.446	-68.3363	1103.1	809.138	147.535	959.342	875.467	-133.687	964.086	865.11	11.2326	913.584	807.429	256.388	641.632	878.724	231.973	738.65	656.521	163.296	742.622	659.693	194.686	759.072	587.47	180.116	730.892	497.242	-245.755	660.191	868.156	-209.625	738.531	643.828	-148.035	746.439	662.341	-154.952	756.277	585.456	-136.96	731.161	497.976
357	3.56	2.95383	1095.2	771.003	72.1894	1092.22	818.423	-68.3377	1103.12	809.147	147.574	959.317	875.464	-133.667	964.055	865.144	11.2697	913.527	807.479	256.387	641.537	878.666	232.007	738.628	656.592	163.322	742.612	659.719	194.72	759.067	587.504	180.156	730.89	497.302	-245.756	660.176	868.13	-209.62	738.519	643.871	-148.019	746.418	662.361	-154.95	756.277	585.44	-136.949	731.146	497.985
358	3.57	2.98947	1095.13	771.064	72.196	1092.19	818.408	-68.3528	1103.06	809.176	147.628	959.245	875.457	-133.625	964.003	865.132	11.3342	913.368	807.638	256.392	641.446	878.618	232.055	738.573	656.671	163.364	742.547	659.784	194.739	759.048	587.543	180.193	730.833	497.347	-245.783	660.129	868.106	-209.836	738.568	643.308	-147.996	746.336	662.398	-155.175	756.773	584.482	-136.853	731.459	497.341
359	3.58	3.02895	1095.01	771.218	72.2071	1092.16	818.423	-68.3451	1103	809.196	147.664	959.164	875.474	-133.594	963.939	865.126	11.3963	913.15	807.826	256.401	641.405	878.614	232.105	738.5	656.72	163.431	742.477	659.865	194.751	759.034	587.534	180.214	730.776	497.375	-245.777	660.105	868.085	-210.359	738.779	641.957	-147.959	746.247	662.427	-155.648	757.903	582.413	-136.651	732.222	495.964
360	3.59	3.06438	1094.94	771.319	72.2299	1092.13	818.455	-68.3288	1102.94	809.251	147.707	959.107	875.468	-133.555	963.884	865.08	11.4354	913.01	807.924	256.408	641.349	878.559	232.158	738.438	656.756	163.489	742.439	659.923	194.776	759.035	587.554	180.239	730.753	497.383	-245.807	660.095	868.126	-210.488	738.823	641.608	-147.92	746.194	662.453	-155.736	758.167	581.862	-136.572	732.34	495.672
361	3.6	3.08544	1094.92	771.302	72.2365	1092.11	818.426	-68.3043	1102.92	809.204	147.721	959.082	875.431	-133.543	963.864	865.036	11.4757	912.905	807.963	256.413	641.323	878.511	232.192	738.419	656.748	163.51	742.398	659.915	194.803	759.025	587.578	180.248	730.75	497.36	-245.814	660.08	868.147	-210.504	738.817	641.492	-147.924	746.282	662.597	-155.746	758.214	581.7	-136.527	732.352	495.591
362	3.61	3.07608	1094.94	771.242	72.227	1092.14	818.408	-68.3145	1102.95	809.144	147.699	959.084	875.421	-133.549	963.871	865.043	11.4671	912.874	807.893	256.398	641.349	878.546	232.16	738.435	656.726	163.483	742.398	659.948	194.802	759.017	587.578	180.221	730.766	497.349	-245.801	660.035	868.111	-210.261	738.708	642.086	-147.999	746.474	662.861	-155.559	757.737	582.617	-136.615	732.036	496.194
363	3.62	3.03508	1095.04	771.128	72.2159	1092.19	818.414	-68.3293	1103.02	809.114	147.653	959.121	875.411	-133.583	963.907	865.073	11.4351	912.942	807.764	256.383	641.391	878.606	232.091	738.514	656.701	163.423	742.459	659.938	194.788	759.038	587.606	180.185	730.81	497.355	-245.755	660.028	868.12	-209.743	738.497	643.488	-147.973	746.375	662.509	-155.123	756.615	584.767	-136.843	731.294	497.599
364	3.63	2.97027	1095.18	770.856	72.1891	1092.24	818.365	-68.3335	1103.07	809.084	147.617	959.192	875.364	-133.623	963.94	865.058	11.3745	913.067	807.501	256.395	641.41	878.606	232.017	738.595	656.625	163.371	742.562	659.834	194.757	759.06	587.593	180.154	730.866	497.327	-245.681	660.043	868.125	-209.635	738.493	643.807	-148.021	746.427	662.391	-155.011	756.369	585.299	-136.943	731.2	497.889
365	3.64	2.94143	1095.26	770.697	72.155	1092.28	818.268	-68.3324	1103.08	809.031	147.614	959.237	875.338	-133.624	963.955	865.014	11.327	913.125	807.301	256.419	641.429	878.606	231.983	738.641	656.592	163.331	742.634	659.713	194.741	759.047	587.553	180.13	730.916	497.28	-245.634	660.051	868.101	-209.615	738.528	643.864	-148.061	746.463	662.37	-154.976	756.322	585.411	-136.982	731.226	497.937
366	3.65	2.92802	1095.26	770.687	72.1424	1092.27	818.274	-68.3429	1103.07	809.033	147.617	959.219	875.344	-133.606	963.928	864.99	11.3086	913.104	807.203	256.443	641.43	878.605	231.994	738.634	656.586	163.31	742.637	659.661	194.718	759.033	587.51	180.13	730.922	497.276	-245.672	660.092	868.185	-209.627	738.532	643.876	-148.063	746.446	662.352	-154.981	756.296	585.443	-137.001	731.213	498.004
367	3.66	2.94455	1095.18	770.781	72.1636	1092.21	818.306	-68.3437	1103.04	809.065	147.643	959.155	875.32	-133.586	963.872	865.001	11.339	912.935	807.327	256.461	641.366	878.566	232.028	738.581	656.607	163.324	742.586	659.709	194.71	759.025	587.498	180.133	730.882	497.29	-245.703	660.073	868.212	-209.625	738.484	643.882	-148.041	746.395	662.355	-154.999	756.269	585.477	-137.004	731.133	498.019
368	3.67	2.98383	1095.04	770.957	72.1901	1092.13	818.287	-68.3377	1102.97	809.089	147.67	959.05	875.294	-133.561	963.786	865.004	11.3927	912.705	807.507	256.481	641.283	878.556	232.067	738.471	656.666	163.374	742.478	659.808	194.702	759.009	587.473	180.152	730.809	497.334	-245.695	659.987	868.181	-209.851	738.523	643.286	-148.066	746.395	662.603	-155.209	756.741	584.564	-136.898	731.374	497.418
369	3.68	3.01347	1094.91	771.109	72.2161	1092.07	818.319	-68.3486	1102.88	809.158	147.708	958.968	875.326	-133.522	963.692	865.024	11.4423	912.516	807.713	256.48	641.207	878.535	232.127	738.355	656.771	163.421	742.399	659.894	194.681	759.009	587.44	180.174	730.742	497.358	-245.692	659.913	868.175	-210.387	738.711	641.967	-148.152	746.548	663.093	-155.668	757.837	582.468	-136.697	732.081	496.057
370	3.69	3.03437	1094.84	771.219	72.2483	1092.02	818.385	-68.3281	1102.81	809.158	147.756	958.922	875.357	-133.48	963.629	865.023	11.4806	912.383	807.777	256.469	641.182	878.508	232.18	738.301	656.832	163.456	742.364	659.966	194.686	759.012	587.445	180.186	730.711	497.4	-245.71	659.879	868.182	-210.522	738.75	641.627	-148.127	746.396	663.1	-155.774	758.083	581.939	-136.649	732.229	495.743
371	3.7	3.06737	1094.86	771.127	72.2663	1092.04	818.336	-68.2995	1102.84	809.081	147.774	958.918	875.295	-133.457	963.63	864.954	11.524	912.366	807.627	256.463	641.198	878.501	232.18	738.33	656.767	163.481	742.375	659.901	194.715	759.01	587.466	180.189	730.729	497.367	-245.673	659.874	868.12	-210.526	738.767	641.506	-148.015	746.154	662.681	-155.793	758.186	581.752	-136.614	732.311	495.624
372	3.71	3.07486	1094.98	770.933	72.2712	1092.11	818.24	-68.2841	1102.94	809.025	147.744	958.966	875.232	-133.486	963.699	864.963	11.5322	912.441	807.458	256.452	641.209	878.499	232.139	738.433	656.668	163.477	742.448	659.841	194.723	759.029	587.466	180.181	730.801	497.333	-245.639	659.919	868.166	-210.279	738.704	642.096	-147.977	746.199	662.512	-155.599	757.763	582.645	-136.698	732.059	496.201
373	3.72	3.04729	1095.1	770.763	72.2662	1092.18	818.22	-68.2739	1103.03	808.986	147.726	959.04	875.24	-133.512	963.775	864.982	11.5212	912.532	807.337	256.427	641.24	878.523	232.085	738.558	656.618	163.426	742.536	659.798	194.754	759.057	587.538	180.149	730.882	497.331	-245.609	659.965	868.21	-209.768	738.523	643.51	-147.984	746.323	662.426	-155.129	756.664	584.776	-136.931	731.351	497.596
374	3.73	3.03669	1095.21	770.575	72.276	1092.23	818.207	-68.2545	1103.09	808.909	147.708	959.094	875.251	-133.496	963.804	864.985	11.4922	912.593	807.163	256.414	641.259	878.562	232.042	738.628	656.585	163.36	742.621	659.714	194.782	759.073	587.569	180.11	730.946	497.288	-245.572	659.974	868.217	-209.652	738.539	643.839	-148.023	746.423	662.379	-154.998	756.401	585.291	-137.001	731.258	497.898
375	3.74	3.03225	1095.28	770.423	72.2773	1092.23	818.188	-68.2277	1103.12	808.854	147.71	959.113	875.272	-133.478	963.79	864.961	11.4896	912.566	807.044	256.413	641.229	878.578	232.051	738.644	656.624	163.323	742.678	659.651	194.794	759.073	587.598	180.101	730.97	497.278	-245.537	659.962	868.167	-209.616	738.557	643.881	-148.021	746.485	662.326	-154.965	756.349	585.401	-137.028	731.279	497.942
376	3.75	3.0521	1095.2	770.514	72.2812	1092.19	818.196	-68.2265	1103.09	808.898	147.73	959.078	875.265	-133.449	963.76	864.982	11.5287	912.404	807.175	256.428	641.173	878.55	232.063	738.608	656.683	163.336	742.649	659.691	194.806	759.079	587.642	180.121	730.92	497.313	-245.55	659.954	868.2	-209.614	738.52	643.909	-148.061	746.583	662.517	-154.964	756.305	585.475	-137.04	731.236	498.001
377	3.76	3.09997	1095.05	770.77	72.3021	1092.13	818.193	-68.2309	1103.01	808.946	147.775	958.973	875.239	-133.413	963.671	864.945	11.5549	912.225	807.315	256.446	641.102	878.507	232.101	738.52	656.737	163.399	742.515	659.841	194.812	759.051	587.617	180.158	730.847	497.364	-245.577	659.913	868.215	-209.828	738.557	643.323	-148.144	746.742	663	-155.176	756.77	584.546	-136.898	731.496	497.378
378	3.77	3.17614	1094.9	771.005	72.3335	1092.05	818.238	-68.1928	1102.9	808.968	147.839	958.862	875.268	-133.368	963.554	864.907	11.6017	912.038	807.431	256.44	641.02	878.494	232.16	738.396	656.783	163.451	742.377	659.961	194.794	759.018	587.565	180.192	730.762	497.403	-245.566	659.819	868.13	-210.332	738.71	641.932	-148.08	746.513	662.976	-155.647	757.874	582.422	-136.675	732.187	495.998
379	3.78	3.20388	1094.81	771.056	72.3663	1091.97	818.307	-68.1607	1102.83	809.009	147.883	958.791	875.311	-133.332	963.459	864.946	11.6132	911.928	807.476	256.419	640.933	878.475	232.198	738.306	656.854	163.478	742.323	659.997	194.767	759.006	587.545	180.208	730.72	497.429	-245.577	659.757	868.119	-210.471	738.727	641.611	-147.993	746.266	662.772	-155.76	758.105	581.902	-136.625	732.297	495.691
380	3.79	3.2101	1094.82	771.032	72.3587	1091.98	818.3	-68.1623	1102.86	808.994	147.893	958.777	875.299	-133.333	963.434	864.944	11.6051	911.897	807.453	256.403	640.911	878.47	232.196	738.289	656.868	163.495	742.322	660.003	194.757	759.008	587.566	180.197	730.735	497.424	-245.594	659.768	868.17	-210.515	738.749	641.583	-148.086	746.477	663.149	-155.801	758.17	581.843	-136.618	732.322	495.628
381	3.8	3.22143	1094.88	770.927	72.3593	1092.04	818.223	-68.1634	1102.92	808.879	147.883	958.81	875.241	-133.352	963.485	864.906	11.6164	911.895	807.361	256.378	640.955	878.48	232.161	738.36	656.805	163.479	742.352	659.946	194.739	759.02	587.544	180.177	730.782	497.382	-245.56	659.807	868.175	-210.525	738.772	641.558	-148.083	746.471	663.047	-155.823	758.241	581.775	-136.618	732.393	495.584
382	3.81	3.2134	1094.99	770.704	72.3725	1092.1	818.177	-68.1582	1102.98	808.806	147.836	958.871	875.19	-133.382	963.571	864.885	11.6101	911.925	807.147	256.345	641.014	878.514	232.1	738.479	656.704	163.435	742.431	659.902	194.737	759.029	587.549	180.139	730.851	497.341	-245.529	659.883	868.216	-210.292	738.708	642.145	-148.028	746.309	662.633	-155.63	757.797	582.664	-136.729	732.141	496.144
383	3.82	3.16614	1095.13	770.487	72.3546	1092.16	818.154	-68.1649	1103.05	808.786	147.782	958.915	875.156	-133.423	963.623	864.86	11.5684	911.959	806.999	256.335	641.067	878.546	232.038	738.58	656.645	163.366	742.529	659.84	194.721	759.048	587.571	180.089	730.928	497.318	-245.514	659.908	868.234	-209.783	738.52	643.506	-148.052	746.366	662.444	-155.184	756.682	584.743	-136.967	731.419	497.526
384	3.83	3.12577	1095.22	770.357	72.3562	1092.21	818.083	-68.1519	1103.11	808.74	147.763	958.937	875.133	-133.421	963.639	864.833	11.5554	911.967	806.87	256.344	641.046	878.54	232.009	738.609	656.649	163.321	742.593	659.767	194.709	759.066	587.538	180.074	730.958	497.315	-245.507	659.894	868.219	-209.67	738.506	643.835	-148.078	746.414	662.388	-155.07	756.409	585.263	-137.047	731.283	497.881
385	3.84	3.14729	1095.21	770.371	72.3716	1092.2	818.061	-68.1229	1103.1	808.699	147.793	958.922	875.143	-133.403	963.606	864.818	11.5871	911.929	806.841	256.355	640.984	878.512	232.041	738.58	656.681	163.336	742.596	659.735	194.739	759.061	587.561	180.104	730.921	497.356	-245.516	659.889	868.253	-209.629	738.487	643.883	-148.062	746.405	662.376	-155.005	756.328	585.399	-137.055	731.221	497.995
386	3.85	3.20926	1095.08	770.533	72.3865	1092.15	818.067	-68.1194	1103.03	808.71	147.836	958.846	875.138	-133.366	963.519	864.773	11.6139	911.828	806.964	256.381	640.924	878.493	232.075	738.49	656.702	163.386	742.524	659.801	194.765	759.044	587.564	180.149	730.843	497.4	-245.521	659.822	868.221	-209.594	738.414	643.91	-148.047	746.449	662.552	-154.999	756.265	585.448	-137.019	731.14	497.967
387	3.86	3.26109	1094.94	770.745	72.408	1092.08	818.087	-68.1203	1102.96	808.76	147.887	958.759	875.173	-133.304	963.399	864.752	11.6323	911.685	807.109	256.411	640.875	878.491	232.13	738.382	656.768	163.448	742.427	659.896	194.78	759.029	587.538	180.18	730.766	497.44	-245.545	659.753	868.198	-209.813	738.436	643.334	-148.041	746.48	662.813	-155.218	756.73	584.549	-136.904	731.385	497.384
388	3.87	3.28004	1094.86	770.883	72.4529	1092.03	818.142	-68.1071	1102.9	808.813	147.939	958.697	875.191	-133.247	963.302	864.76	11.6565	911.582	807.184	256.421	640.813	878.458	232.188	738.3	656.825	163.489	742.354	659.971	194.78	759.015	587.538	180.202	730.731	497.473	-245.572	659.689	868.187	-210.351	738.66	641.99	-147.94	746.204	662.535	-155.664	757.848	582.435	-136.696	732.127	496.038
389	3.88	3.2859	1094.84	770.84	72.4638	1092.03	818.099	-68.0824	1102.89	808.801	147.939	958.686	875.186	-133.245	963.271	864.764	11.6778	911.531	807.141	256.404	640.777	878.431	232.21	738.286	656.828	163.502	742.338	659.967	194.783	759.024	587.533	180.209	730.736	497.448	-245.563	659.664	868.204	-210.474	738.725	641.661	-147.965	746.25	662.65	-155.796	758.113	581.931	-136.626	732.305	495.701
390	3.89	3.30198	1094.86	770.788	72.4666	1092.04	818.078	-68.0661	1102.92	808.75	147.925	958.707	875.194	-133.265	963.306	864.781	11.6858	911.532	807.053	256.38	640.769	878.425	232.18	738.344	656.775	163.496	742.374	659.944	194.807	759.035	587.595	180.18	730.77	497.415	-245.51	659.676	868.203	-210.494	738.752	641.568	-148.036	746.42	662.873	-155.847	758.21	581.805	-136.623	732.402	495.606
391	3.9	3.33046	1094.92	770.701	72.4851	1092.08	818.069	-68.0391	1102.97	808.667	147.933	958.747	875.202	-133.278	963.361	864.782	11.6949	911.575	806.953	256.346	640.806	878.432	232.144	738.422	656.724	163.497	742.437	659.93	194.824	759.058	587.625	180.177	730.825	497.406	-245.453	659.704	868.185	-210.262	738.688	642.162	-147.968	746.272	662.57	-155.622	757.782	582.699	-136.714	732.128	496.208
392	3.91	3.33374	1095.01	770.522	72.4901	1092.12	818.024	-68.0206	1103.02	808.615	147.905	958.79	875.177	-133.289	963.426	864.784	11.6963	911.63	806.85	256.336	640.857	878.456	232.101	738.508	656.645	163.462	742.506	659.855	194.819	759.065	587.613	180.161	730.879	497.358	-245.398	659.758	868.206	-209.744	738.488	643.513	-147.968	746.282	662.454	-155.159	756.668	584.779	-136.924	731.386	497.61
393	3.92	3.29636	1095.08	770.393	72.4721	1092.14	817.987	-68.0355	1103.05	808.612	147.872	958.804	875.147	-133.293	963.458	864.802	11.666	911.652	806.747	256.332	640.873	878.482	232.056	738.565	656.621	163.413	742.567	659.798	194.81	759.044	587.618	180.12	730.925	497.3	-245.367	659.756	868.231	-209.631	738.465	643.854	-148.009	746.334	662.418	-155.054	756.397	585.281	-137.03	731.238	497.931
394	3.93	3.28595	1095.07	770.429	72.4563	1092.12	817.987	-68.0521	1103.03	808.618	147.876	958.802	875.185	-133.285	963.45	864.858	11.6592	911.618	806.784	256.338	640.866	878.499	232.067	738.551	656.678	163.398	742.552	659.848	194.796	759.045	587.641	180.124	730.92	497.353	-245.329	659.699	868.197	-209.621	738.45	643.956	-148.008	746.345	662.415	-155.029	756.323	585.426	-137.061	731.185	498.02
395	3.94	3.29078	1095	770.493	72.4703	1092.06	818.006	-68.0521	1102.97	808.634	147.911	958.747	875.236	-133.265	963.372	864.844	11.6604	911.519	806.883	256.367	640.824	878.505	232.089	738.464	656.708	163.409	742.496	659.88	194.783	759.036	587.607	180.141	730.847	497.401	-245.328	659.638	868.182	-209.602	738.395	644.004	-148.028	746.407	662.585	-155.034	756.283	585.464	-137.047	731.108	498.084
396	3.95	3.32797	1094.89	770.576	72.4989	1092.01	817.999	-68.0504	1102.92	808.637	147.944	958.667	875.218	-133.241	963.266	864.825	11.6566	911.399	806.89	256.395	640.765	878.475	232.132	738.361	656.766	163.44	742.422	659.9	194.78	758.997	587.564	180.162	730.776	497.41	-245.331	659.565	868.133	-209.817	738.439	643.39	-148.107	746.58	662.993	-155.249	756.75	584.531	-136.948	731.411	497.431
397	3.96	3.35179	1094.8	770.712	72.5213	1091.98	817.995	-68.0503	1102.88	808.647	147.974	958.614	875.218	-133.204	963.189	864.821	11.6856	911.286	806.993	256.408	640.716	878.449	232.165	738.303	656.804	163.463	742.357	659.93	194.78	758.984	587.55	180.18	730.744	497.414	-245.357	659.561	868.186	-210.346	738.655	642	-148.074	746.468	662.946	-155.732	757.873	582.438	-136.755	732.206	495.986
398	3.97	3.35458	1094.8	770.784	72.5375	1091.99	817.987	-68.0349	1102.86	808.695	147.986	958.61	875.237	-133.192	963.176	864.852	11.701	911.233	807.059	256.385	640.683	878.431	232.179	738.308	656.822	163.461	742.365	659.95	194.761	759.005	587.541	180.18	730.757	497.43	-245.356	659.56	868.241	-210.487	738.721	641.663	-147.965	746.199	662.587	-155.861	758.163	581.95	-136.719	732.392	495.653
399	3.98	3.37497	1094.84	770.755	72.5335	1092.02	817.962	-68.0259	1102.88	808.685	147.978	958.611	875.214	-133.211	963.189	864.859	11.7064	911.276	806.959	256.363	640.68	878.429	232.163	738.343	656.797	163.462	742.382	659.959	194.756	759.027	587.561	180.176	730.799	497.418	-245.316	659.55	868.269	-210.514	738.738	641.586	-147.948	746.169	662.517	-155.882	758.261	581.857	-136.714	732.475	495.57
400	3.99	3.39193	1094.89	770.659	72.5375	1092.07	817.93	-68.0121	1102.93	808.643	147.974	958.638	875.211	-133.218	963.207	864.858	11.698	911.344	806.808	256.338	640.679	878.429	232.153	738.404	656.758	163.499	742.425	659.943	194.776	759.042	587.583	180.168	730.834	497.402	-245.278	659.532	868.265	-210.27	738.656	642.185	-147.952	746.193	662.494	-155.675	757.797	582.767	-136.796	732.166	496.177
401	4	3.38443	1094.98	770.54	72.5476	1092.11	817.911	-68.0045	1102.97	808.618	147.962	958.674	875.22	-133.233	963.231	864.873	11.7227	911.376	806.784	256.317	640.688	878.445	232.133	738.462	656.732	163.498	742.479	659.903	194.784	759.065	587.594	180.165	730.87	497.384	-245.247	659.545	868.29	-209.746	738.443	643.559	-147.946	746.225	662.468	-155.188	756.652	584.869	-136.985	731.356	497.617
402	4.01	3.37505	1095	770.482	72.541	1092.11	817.927	-67.997	1102.97	808.623	147.949	958.689	875.201	-133.236	963.253	864.895	11.7194	911.376	806.784	256.306	640.697	878.456	232.102	738.488	656.7	163.471	742.505	659.893	194.792	759.078	587.615	180.168	730.893	497.379	-245.236	659.556	868.323	-209.62	738.406	643.879	-147.957	746.267	662.442	-155.061	756.375	585.368	-137.034	731.178	497.956
403	4.02	3.35425	1094.99	770.501	72.5312	1092.11	817.894	-68.0002	1102.99	808.596	147.954	958.691	875.184	-133.225	963.249	864.919	11.7071	911.333	806.831	256.33	640.708	878.463	232.083	738.48	656.679	163.447	742.493	659.87	194.792	759.079	587.632	180.156	730.889	497.361	-245.233	659.582	868.361	-209.589	738.394	643.968	-147.954	746.279	662.432	-155.056	756.307	585.512	-137.044	731.156	498.038
404	4.03	3.35719	1094.95	770.573	72.5382	1092.08	817.926	-68.0007	1103	808.581	147.983	958.665	875.196	-133.185	963.204	864.9	11.7115	911.267	806.91	256.363	640.694	878.443	232.105	738.426	656.722	163.453	742.442	659.902	194.783	759.065	587.625	180.18	730.85	497.396	-245.214	659.557	868.32	-209.573	738.36	644.01	-147.999	746.372	662.619	-155.051	756.287	585.551	-137.067	731.111	498.071
405	4.04	3.38895	1094.9	770.614	72.5588	1092.08	817.955	-67.9852	1102.96	808.604	148.013	958.612	875.227	-133.133	963.14	864.866	11.742	911.185	807.025	256.373	640.654	878.422	232.14	738.364	656.767	163.478	742.386	659.96	194.79	759.049	587.605	180.207	730.813	497.431	-245.175	659.508	868.255	-209.542	738.323	644.012	-148.006	746.464	662.816	-155.033	756.281	585.512	-137.034	731.032	498.086
406	4.05	3.39755	1094.87	770.631	72.5881	1092.06	817.95	-67.9594	1102.93	808.614	148.057	958.577	875.257	-133.093	963.09	864.863	11.8039	911.116	807.055	256.379	640.632	878.429	232.181	738.328	656.814	163.507	742.364	659.958	194.812	759.025	587.598	180.222	730.79	497.429	-245.157	659.494	868.272	-209.756	738.415	643.401	-147.924	746.354	662.675	-155.228	756.781	584.542	-136.912	731.375	497.421
407	4.06	3.40335	1094.9	770.626	72.6003	1092.05	817.95	-67.9496	1102.91	808.645	148.091	958.565	875.274	-133.081	963.064	864.877	11.824	911.109	806.999	256.375	640.607	878.423	232.187	738.329	656.815	163.521	742.365	659.973	194.839	759.02	587.614	180.238	730.789	497.432	-245.149	659.482	868.28	-210.282	738.662	642.039	-147.977	746.443	662.877	-155.691	757.906	582.429	-136.719	732.243	495.972
408	4.07	3.39815	1094.92	770.652	72.5919	1092.08	817.978	-67.9806	1102.93	808.673	148.069	958.576	875.257	-133.11	963.099	864.913	11.7845	911.104	806.996	256.366	640.595	878.421	232.17	738.364	656.795	163.495	742.395	659.979	194.827	759.039	587.643	180.232	730.812	497.441	-245.167	659.498	868.347	-210.205	738.621	642.307	-147.917	746.248	662.561	-155.634	757.684	582.901	-136.795	732.097	496.274
409	4.08	3.36552	1094.96	770.679	72.5538	1092.1	817.961	-68.0142	1102.96	808.708	148.005	958.601	875.209	-133.164	963.143	864.926	11.7283	911.157	806.962	256.341	640.605	878.421	232.121	738.404	656.764	163.449	742.453	659.935	194.794	759.057	587.654	180.192	730.843	497.426	-245.19	659.495	868.385	-209.742	738.413	643.589	-147.952	746.23	662.532	-155.214	756.603	584.929	-137.03	731.337	497.655
410	4.09	3.32378	1095	770.612	72.5221	1092.1	817.94	-68.0355	1102.96	808.711	147.962	958.617	875.199	-133.193	963.154	864.897	11.714	911.196	806.897	256.303	640.6	878.406	232.081	738.422	656.735	163.397	742.459	659.886	194.759	759.059	587.632	180.146	730.859	497.382	-245.165	659.435	868.313	-209.637	738.374	643.887	-148.019	746.338	662.694	-155.135	756.339	585.411	-137.088	731.179	497.984
411	4.1	3.32612	1095	770.564	72.515	1092.1	817.949	-68.048	1102.95	808.73	147.951	958.602	875.226	-133.201	963.15	864.899	11.7082	911.157	806.954	256.282	640.59	878.396	232.071	738.411	656.702	163.412	742.445	659.902	194.749	759.045	587.593	180.135	730.857	497.373	-245.121	659.354	868.214	-209.61	738.333	643.999	-148.073	746.478	662.893	-155.113	756.27	585.507	-137.11	731.096	498.094
412	4.11	3.34658	1094.98	770.564	72.5438	1092.09	817.954	-68.0359	1102.92	808.729	147.961	958.581	875.248	-133.17	963.105	864.897	11.7148	911.094	807.001	256.294	640.598	878.408	232.07	738.381	656.696	163.415	742.424	659.927	194.741	759.043	587.567	180.142	730.846	497.379	-245.128	659.371	868.244	-209.597	738.304	644.051	-147.981	746.25	662.581	-155.1	756.261	585.522	-137.094	731.044	498.122
413	4.12	3.3587	1094.97	770.545	72.5538	1092.08	817.944	-68.0172	1102.92	808.677	147.99	958.547	875.258	-133.122	963.046	864.882	11.7445	911.026	807.031	256.31	640.578	878.382	232.101	738.349	656.738	163.437	742.393	659.959	194.726	759.03	587.555	180.151	730.832	497.378	-245.127	659.427	868.333	-209.815	738.408	643.431	-147.953	746.168	662.495	-155.302	756.776	584.604	-136.977	731.406	497.477
414	4.13	3.39089	1094.95	770.598	72.5763	1092.08	817.957	-67.9822	1102.94	808.626	148.042	958.52	875.265	-133.073	963.027	864.9	11.7907	910.913	807.107	256.342	640.588	878.421	232.145	738.325	656.778	163.48	742.379	659.992	194.74	759.019	587.563	180.178	730.817	497.422	-245.087	659.491	868.403	-210.321	738.677	642.034	-147.914	746.13	662.459	-155.744	757.937	582.486	-136.757	732.249	495.999
415	4.14	3.42634	1094.95	770.642	72.5907	1092.09	817.965	-67.9445	1102.93	808.638	148.087	958.508	875.263	-133.045	963.024	864.924	11.8136	910.893	807.149	256.367	640.569	878.439	232.179	738.318	656.808	163.512	742.372	660.019	194.764	759.025	587.556	180.211	730.812	497.457	-245.068	659.533	868.458	-210.424	738.741	641.673	-147.884	746.123	662.441	-155.833	758.225	581.955	-136.674	732.462	495.602
416	4.15	3.4177	1094.99	770.567	72.6069	1092.11	817.963	-67.9574	1102.99	808.623	148.103	958.507	875.235	-133.053	963.034	864.919	11.8268	910.953	807.042	256.367	640.545	878.436	232.18	738.338	656.817	163.515	742.381	659.99	194.798	759.024	587.553	180.221	730.794	497.456	-245.08	659.503	868.468	-210.215	738.642	642.216	-147.864	746.168	662.419	-155.641	757.781	582.766	-136.747	732.176	496.147
417	4.16	3.40975	1095.02	770.499	72.614	1092.13	817.938	-67.9596	1103	808.607	148.079	958.518	875.181	-133.087	963.037	864.887	11.8058	911.027	806.895	256.344	640.519	878.397	232.158	738.379	656.802	163.495	742.413	659.966	194.835	759.012	587.603	180.216	730.81	497.428	-245.082	659.439	868.403	-209.723	738.414	643.576	-147.876	746.205	662.41	-155.18	756.626	584.833	-136.968	731.382	497.555
418	4.17	3.37913	1095.05	770.507	72.58	1092.14	817.915	-67.9901	1102.99	808.669	148.037	958.548	875.166	-133.127	963.056	864.909	11.7459	911.048	806.879	256.318	640.507	878.371	232.117	738.411	656.748	163.432	742.462	659.904	194.842	759.029	587.649	180.189	730.838	497.402	-245.039	659.326	868.291	-209.624	738.36	643.891	-147.961	746.356	662.609	-155.069	756.329	585.354	-137.084	731.19	497.953
419	4.18	3.32627	1095.07	770.494	72.5493	1092.14	817.901	-68.0397	1102.97	808.749	147.992	958.58	875.192	-133.155	963.071	864.952	11.6971	911.06	806.904	256.302	640.526	878.388	232.075	738.439	656.746	163.386	742.493	659.897	194.822	759.071	587.686	180.164	730.86	497.424	-245.063	659.289	868.326	-209.629	738.366	644.017	-148.097	746.637	663.06	-155.074	756.257	585.57	-137.147	731.149	498.113
420	4.19	3.33429	1095.06	770.491	72.5396	1092.14	817.911	-68.0275	1102.95	808.743	147.962	958.563	875.189	-133.162	963.051	864.965	11.7071	911.021	806.968	256.271	640.537	878.414	232.071	738.438	656.77	163.389	742.461	659.942	194.827	759.07	587.709	180.156	730.858	497.434	-245.072	659.288	868.38	-209.622	738.362	644.087	-148.107	746.701	663.154	-155.075	756.235	585.646	-137.134	731.14	498.134
421	4.2	3.38926	1094.99	770.547	72.5621	1092.12	817.891	-67.978	1102.94	808.652	147.992	958.535	875.177	-133.139	963.006	864.931	11.7785	910.941	807.012	256.259	640.537	878.411	232.11	738.408	656.786	163.467	742.42	659.968	194.855	759.057	587.686	180.188	730.842	497.415	-245.026	659.274	868.352	-209.792	738.449	643.469	-148.014	746.571	662.982	-155.249	756.742	584.663	-136.994	731.452	497.483
422	4.21	3.4258	1094.94	770.621	72.6031	1092.1	817.913	-67.9565	1102.92	808.653	148.036	958.513	875.205	-133.088	962.965	864.937	11.8477	910.817	807.147	256.27	640.548	878.41	232.174	738.376	656.827	163.536	742.372	660.019	194.876	759.051	587.662	180.206	730.834	497.41	-244.973	659.299	868.326	-210.288	738.686	642.099	-147.85	746.255	662.554	-155.709	757.902	582.506	-136.736	732.274	496.019
423	4.22	3.428	1094.93	770.66	72.6198	1092.08	817.979	-67.9331	1102.9	808.679	148.073	958.497	875.239	-133.065	962.933	864.923	11.8846	910.713	807.299	256.301	640.555	878.413	232.227	738.331	656.868	163.552	742.36	660.067	194.883	759.04	587.677	180.213	730.825	497.422	-244.992	659.365	868.414	-210.414	738.752	641.755	-147.785	746.133	662.45	-155.824	758.197	581.989	-136.659	732.479	495.647
424	4.23	3.39699	1094.92	770.64	72.5881	1092.06	817.929	-67.9257	1102.9	808.641	148.047	958.466	875.214	-133.056	962.905	864.885	11.8509	910.703	807.283	256.314	640.551	878.424	232.227	738.326	656.853	163.531	742.361	660.043	194.84	759.034	587.636	180.226	730.816	497.426	-244.982	659.397	868.454	-210.437	738.762	641.628	-147.783	746.091	662.417	-155.832	758.267	581.83	-136.636	732.513	495.546
425	4.24	3.35116	1094.91	770.576	72.5333	1092.05	817.846	-67.9823	1102.9	808.606	148.011	958.445	875.15	-133.092	962.898	864.886	11.7864	910.764	807.141	256.301	640.523	878.401	232.199	738.326	656.828	163.496	742.367	659.984	194.785	759.022	587.569	180.225	730.797	497.443	-244.947	659.368	868.407	-210.465	738.755	641.588	-147.843	746.096	662.436	-155.866	758.304	581.769	-136.661	732.534	495.498
426	4.25	3.27655	1094.93	770.503	72.4847	1092.04	817.812	-68.0682	1102.89	808.62	147.972	958.443	875.123	-133.162	962.918	864.912	11.6923	910.836	807.002	256.29	640.485	878.388	232.116	738.334	656.779	163.442	742.381	659.95	194.739	759.028	587.55	180.184	730.799	497.434	-244.951	659.273	868.361	-210.273	738.619	642.197	-147.966	746.257	662.646	-155.729	757.79	582.731	-136.827	732.203	496.106
427	4.26	3.19249	1094.98	770.39	72.4275	1092.05	817.773	-68.1213	1102.88	808.601	147.909	958.455	875.079	-133.22	962.934	864.93	11.6034	910.866	806.881	256.286	640.466	878.383	232.043	738.374	656.746	163.365	742.413	659.893	194.699	759.017	587.511	180.139	730.807	497.404	-244.964	659.19	868.353	-209.793	738.382	643.555	-148.14	746.569	663.029	-155.301	756.615	584.846	-137.087	731.401	497.558
428	4.27	3.14988	1095.04	770.302	72.4167	1092.08	817.728	-68.1447	1102.88	808.637	147.868	958.488	875.032	-133.252	962.951	864.923	11.5655	910.917	806.749	256.255	640.444	878.37	232.023	738.421	656.712	163.332	742.457	659.859	194.7	759.02	587.526	180.107	730.844	497.37	-244.966	659.16	868.353	-209.679	738.346	643.899	-148.186	746.66	663.11	-155.188	756.316	585.38	-137.181	731.208	497.949
429	4.28	3.18109	1095.03	770.301	72.4379	1092.11	817.742	-68.1355	1102.88	808.668	147.868	958.51	875.041	-133.247	962.953	864.939	11.5892	910.927	806.768	256.216	640.46	878.365	232.03	738.445	656.72	163.368	742.479	659.903	194.725	759.053	587.554	180.12	730.874	497.415	-244.968	659.169	868.387	-209.638	738.346	644.042	-148.177	746.71	663.146	-155.151	756.269	585.538	-137.185	731.162	498.069
430	4.29	3.23291	1094.99	770.388	72.468	1092.11	817.802	-68.1157	1102.87	808.639	147.898	958.509	875.073	-133.203	962.912	864.933	11.6662	910.888	806.878	256.186	640.474	878.387	232.052	738.434	656.728	163.426	742.438	659.992	194.755	759.061	587.564	180.159	730.873	497.438	-244.966	659.205	868.448	-209.838	738.439	643.482	-148.075	746.587	663.02	-155.336	756.778	584.653	-137.052	731.508	497.465
431	4.3	3.28876	1094.95	770.423	72.4903	1092.09	817.793	-68.0734	1102.88	808.572	147.944	958.489	875.106	-133.151	962.861	864.892	11.7593	910.793	806.953	256.166	640.488	878.403	232.106	738.405	656.762	163.494	742.393	660.015	194.805	759.058	587.601	180.183	730.855	497.415	-244.957	659.22	868.487	-210.311	738.671	642.113	-147.896	746.26	662.605	-155.774	757.922	582.544	-136.787	732.316	496.006
432	4.31	3.31364	1094.89	770.509	72.5079	1092.05	817.803	-68.0563	1102.85	808.554	147.983	958.467	875.155	-133.126	962.811	864.87	11.8157	910.642	807.071	256.167	640.492	878.418	232.17	738.353	656.836	163.521	742.349	660.032	194.842	759.041	587.654	180.204	730.825	497.404	-244.924	659.18	868.426	-210.418	738.726	641.765	-147.797	746.132	662.453	-155.846	758.181	582.004	-136.673	732.475	495.648
433	4.32	3.29809	1094.83	770.588	72.5049	1092.03	817.856	-68.0747	1102.81	808.582	147.985	958.45	875.157	-133.12	962.76	864.903	11.807	910.51	807.231	256.193	640.506	878.43	232.188	738.299	656.875	163.512	742.316	660.046	194.856	759.037	587.662	180.227	730.794	497.455	-244.926	659.174	868.403	-210.455	738.738	641.665	-147.837	746.206	662.612	-155.874	758.237	581.893	-136.642	732.488	495.578
434	4.33	3.2543	1094.81	770.609	72.4561	1092.03	817.834	-68.1113	1102.8	808.591	147.968	958.438	875.121	-133.141	962.742	864.866	11.7588	910.478	807.248	256.236	640.521	878.408	232.171	738.281	656.849	163.486	742.312	660.042	194.823	759.029	587.611	180.225	730.781	497.452	-244.965	659.205	868.476	-210.465	738.731	641.621	-147.929	746.355	662.846	-155.907	758.263	581.864	-136.666	732.505	495.579
435	4.34	3.21661	1094.86	770.435	72.4001	1092.04	817.765	-68.1478	1102.81	808.552	147.927	958.45	875.076	-133.168	962.752	864.827	11.7115	910.61	807.044	256.259	640.524	878.383	232.158	738.317	656.823	163.457	742.361	659.992	194.83	759.023	587.641	180.218	730.788	497.426	-244.933	659.158	868.438	-210.231	738.621	642.219	-147.885	746.198	662.564	-155.698	757.777	582.78	-136.803	732.181	496.197
436	4.35	3.16715	1094.94	770.296	72.3741	1092.06	817.733	-68.1689	1102.84	808.509	147.897	958.474	875.053	-133.207	962.789	864.854	11.6437	910.746	806.82	256.259	640.515	878.406	232.138	738.372	656.815	163.451	742.42	659.948	194.841	759.019	587.663	180.226	730.818	497.438	-244.925	659.139	868.469	-209.727	738.388	643.608	-147.931	746.314	662.668	-155.217	756.653	584.901	-137.04	731.39	497.604
437	4.36	3.13358	1094.99	770.279	72.3657	1092.11	817.686	-68.1872	1102.85	808.491	147.876	958.494	875.025	-133.238	962.819	864.871	11.6108	910.819	806.749	256.246	640.51	878.414	232.117	738.417	656.794	163.437	742.462	659.95	194.829	759.032	587.625	180.206	730.849	497.434	-244.909	659.118	868.491	-209.627	738.36	643.935	-148.015	746.486	662.863	-155.1	756.377	585.417	-137.103	731.217	497.939
438	4.37	3.11116	1095.05	770.183	72.345	1092.13	817.639	-68.2135	1102.85	808.509	147.844	958.519	874.984	-133.266	962.841	864.883	11.6177	910.832	806.761	256.236	640.51	878.395	232.105	738.465	656.771	163.436	742.498	659.944	194.818	759.047	587.62	180.189	730.874	497.415	-244.885	659.09	868.484	-209.596	738.355	644.029	-148.002	746.414	662.729	-155.088	756.3	585.55	-137.13	731.192	498.044
439	4.38	3.06834	1095.05	770.195	72.3134	1092.13	817.655	-68.2408	1102.85	808.523	147.821	958.537	874.978	-133.286	962.842	864.888	11.5955	910.848	806.735	256.214	640.534	878.401	232.085	738.467	656.753	163.423	742.489	659.945	194.805	759.074	587.655	180.176	730.895	497.415	-244.879	659.087	868.537	-209.578	738.346	644.093	-148.041	746.512	662.912	-155.092	756.287	585.61	-137.14	731.193	498.091
440	4.39	3.05357	1094.97	770.285	72.3011	1092.11	817.652	-68.287	1102.83	808.527	147.816	958.513	874.985	-133.298	962.785	864.925	11.5823	910.752	806.823	256.196	640.541	878.39	232.079	738.437	656.751	163.424	742.419	660.01	194.795	759.077	587.645	180.154	730.883	497.406	-244.885	659.065	868.54	-209.579	738.308	644.113	-147.975	746.252	662.637	-155.102	756.263	585.626	-137.141	731.132	498.131
441	4.4	3.07245	1094.83	770.465	72.3078	1092.06	817.662	-68.2881	1102.79	808.546	147.835	958.457	874.987	-133.281	962.71	864.926	11.6074	910.564	807.03	256.192	640.527	878.391	232.104	738.369	656.783	163.468	742.366	660.043	194.795	759.059	587.588	180.157	730.835	497.385	-244.868	658.992	868.475	-209.805	738.378	643.48	-147.892	746.131	662.524	-155.315	756.742	584.658	-137.018	731.42	497.484
442	4.41	3.07537	1094.77	770.515	72.3097	1092.02	817.655	-68.2901	1102.73	808.589	147.872	958.411	875	-133.257	962.629	864.936	11.6543	910.42	807.164	256.219	640.515	878.415	232.14	738.302	656.804	163.5	742.323	660.054	194.795	759.03	587.566	180.174	730.783	497.384	-244.84	658.983	868.518	-210.321	738.593	642.113	-147.891	746.163	662.659	-155.77	757.85	582.564	-136.795	732.219	496.032
443	4.42	3.06013	1094.73	770.543	72.2767	1092	817.639	-68.2896	1102.69	808.598	147.874	958.379	875.036	-133.25	962.571	864.933	11.6364	910.346	807.278	256.249	640.519	878.454	232.16	738.254	656.841	163.475	742.304	660.016	194.771	759.035	587.537	180.192	730.754	497.402	-244.792	658.972	868.487	-210.438	738.648	641.759	-147.955	746.291	662.914	-155.878	758.115	582.032	-136.741	732.401	495.71
444	4.43	3.04973	1094.75	770.549	72.2532	1092.01	817.636	-68.2968	1102.71	808.567	147.878	958.389	875.076	-133.249	962.569	864.951	11.6157	910.378	807.217	256.254	640.512	878.431	232.166	738.27	656.891	163.448	742.314	660.04	194.742	759.04	587.543	180.194	730.769	497.446	-244.794	658.987	868.505	-210.478	738.689	641.685	-147.912	746.092	662.618	-155.93	758.223	581.906	-136.742	732.471	495.625
445	4.44	3.05001	1094.83	770.41	72.264	1092.05	817.648	-68.2876	1102.76	808.508	147.873	958.436	875.052	-133.249	962.616	864.956	11.604	910.47	807.083	256.24	640.512	878.423	232.162	738.332	656.858	163.456	742.352	660.038	194.752	759.045	587.585	180.205	730.802	497.452	-244.781	659.021	868.537	-210.247	738.621	642.259	-147.908	746.076	662.537	-155.712	757.778	582.798	-136.825	732.18	496.21
446	4.45	3.04559	1094.91	770.291	72.2767	1092.09	817.654	-68.274	1102.8	808.491	147.859	958.486	875.008	-133.262	962.657	864.94	11.5978	910.613	806.882	256.206	640.493	878.442	232.136	738.405	656.788	163.46	742.41	659.995	194.796	759.05	587.611	180.218	730.85	497.434	-244.781	659.038	868.569	-209.724	738.409	643.633	-147.878	746.13	662.477	-155.224	756.669	584.879	-137.027	731.418	497.627
447	4.46	3.01093	1095	770.119	72.2577	1092.12	817.621	-68.2866	1102.81	808.487	147.826	958.522	874.999	-133.308	962.702	864.967	11.5803	910.745	806.752	256.14	640.486	878.454	232.089	738.457	656.763	163.427	742.469	659.937	194.83	759.05	587.64	180.195	730.891	497.421	-244.81	659.002	868.582	-209.608	738.374	643.949	-147.88	746.203	662.425	-155.101	756.393	585.406	-137.114	731.258	497.963
448	4.47	2.99619	1095	770.106	72.2422	1092.13	817.63	-68.3076	1102.8	808.458	147.784	958.531	875.056	-133.364	962.724	865.013	11.5498	910.784	806.734	256.074	640.477	878.442	232.055	738.491	656.781	163.397	742.494	659.93	194.835	759.068	587.657	180.165	730.913	497.426	-244.825	658.936	868.554	-209.613	738.368	644.025	-147.948	746.369	662.607	-155.082	756.29	585.575	-137.181	731.235	498.066
449	4.48	2.97362	1094.96	770.17	72.2391	1092.1	817.684	-68.3338	1102.78	808.527	147.75	958.504	875.062	-133.398	962.698	864.995	11.5054	910.738	806.844	256.039	640.473	878.425	232.034	738.47	656.771	163.376	742.466	659.944	194.835	759.093	587.664	180.141	730.902	497.433	-244.81	658.842	868.494	-209.625	738.353	644.064	-148.08	746.612	663.076	-155.101	756.239	585.636	-137.208	731.206	498.116
450	4.49	2.99104	1094.88	770.39	72.2257	1092.04	817.742	-68.3564	1102.74	808.611	147.749	958.47	875.062	-133.398	962.632	865.02	11.489	910.627	806.99	256.055	640.476	878.425	232.046	738.408	656.789	163.386	742.394	659.975	194.822	759.071	587.671	180.153	730.871	497.445	-244.791	658.785	868.454	-209.611	738.301	644.089	-148.119	746.617	663.274	-155.12	756.219	585.688	-137.197	731.138	498.148
451	4.5	3.04715	1094.79	770.631	72.2431	1092	817.791	-68.3495	1102.72	808.638	147.785	958.429	875.09	-133.361	962.549	865.043	11.5565	910.436	807.276	256.081	640.476	878.428	232.086	738.334	656.839	163.429	742.323	660.049	194.833	759.05	587.706	180.174	730.826	497.447	-244.776	658.792	868.46	-209.821	738.35	643.521	-148.047	746.443	663.134	-155.32	756.731	584.756	-137.072	731.445	497.554
452	4.51	3.09822	1094.74	770.678	72.2779	1091.96	817.82	-68.2968	1102.69	808.615	147.847	958.375	875.138	-133.299	962.481	865.055	11.6684	910.257	807.497	256.094	640.469	878.444	232.16	738.271	656.893	163.464	742.276	660.078	194.843	759.042	587.679	180.194	730.793	497.46	-244.76	658.814	868.511	-210.32	738.585	642.115	-147.885	746.091	662.672	-155.769	757.849	582.595	-136.819	732.21	496.128
453	4.52	3.11401	1094.76	770.571	72.3071	1091.98	817.824	-68.2539	1102.69	808.591	147.886	958.344	875.185	-133.267	962.457	865.031	11.7151	910.186	807.493	256.115	640.466	878.474	232.2	738.234	656.923	163.471	742.255	660.071	194.814	759.028	587.605	180.208	730.769	497.465	-244.704	658.867	868.582	-210.423	738.652	641.734	-147.825	745.965	662.504	-155.857	758.126	582.031	-136.711	732.4	495.705
454	4.53	3.0983	1094.82	770.54	72.284	1092.04	817.77	-68.2612	1102.75	808.578	147.877	958.367	875.213	-133.271	962.466	865.03	11.6848	910.285	807.358	256.145	640.464	878.482	232.195	738.251	656.909	163.465	742.282	660.078	194.789	759.03	587.602	180.207	730.785	497.475	-244.675	658.919	868.65	-210.452	738.692	641.693	-147.823	745.978	662.496	-155.895	758.228	581.899	-136.709	732.509	495.572
455	4.54	3.07516	1094.88	770.492	72.2574	1092.08	817.778	-68.2835	1102.81	808.575	147.855	958.419	875.188	-133.294	962.521	865.05	11.6237	910.435	807.166	256.146	640.46	878.478	232.144	738.325	656.874	163.454	742.348	660.071	194.786	759.044	587.62	180.204	730.821	497.492	-244.614	658.87	868.554	-210.236	738.614	642.312	-147.86	746.078	662.519	-155.726	757.782	582.809	-136.839	732.228	496.195
456	4.55	3.01969	1094.96	770.379	72.2644	1092.1	817.815	-68.3061	1102.85	808.53	147.815	958.462	875.123	-133.33	962.59	865.048	11.5617	910.588	806.992	256.125	640.465	878.476	232.097	738.399	656.841	163.424	742.402	660.047	194.791	759.051	587.647	180.196	730.856	497.467	-244.62	658.821	868.502	-209.724	738.398	643.648	-147.917	746.169	662.498	-155.26	756.685	584.934	-137.077	731.436	497.634
457	4.56	2.96554	1095.03	770.235	72.2313	1092.13	817.77	-68.343	1102.85	808.521	147.775	958.478	875.091	-133.363	962.624	865.069	11.5168	910.673	806.919	256.101	640.465	878.473	232.049	738.444	656.78	163.361	742.459	659.954	194.794	759.081	587.643	180.161	730.894	497.427	-244.664	658.794	868.532	-209.642	738.363	643.992	-147.969	746.345	662.627	-155.148	756.393	585.451	-137.189	731.259	497.991
458	4.57	2.92386	1095.08	770.14	72.1911	1092.15	817.705	-68.3693	1102.84	808.56	147.754	958.481	875.075	-133.399	962.643	865.104	11.4753	910.689	806.852	256.081	640.448	878.471	232.018	738.445	656.768	163.34	742.498	659.894	194.781	759.094	587.598	180.133	730.911	497.429	-244.698	658.718	868.51	-209.629	738.337	644.086	-148.11	746.622	663.008	-155.137	756.282	585.595	-137.245	731.225	498.088
459	4.58	2.92702	1095.04	770.187	72.2069	1092.13	817.683	-68.375	1102.82	808.583	147.753	958.439	875.033	-133.398	962.598	865.085	11.4529	910.661	806.795	256.074	640.424	878.46	232.017	738.416	656.78	163.35	742.449	659.901	194.799	759.078	587.591	180.136	730.877	497.416	-244.693	658.686	868.504	-209.617	738.299	644.086	-148.076	746.548	662.917	-155.126	756.235	585.61	-137.248	731.175	498.091
460	4.59	2.98537	1094.92	770.379	72.2335	1092.07	817.716	-68.3516	1102.78	808.575	147.787	958.403	875.054	-133.336	962.525	865.065	11.5315	910.516	807.019	256.086	640.408	878.423	232.054	738.347	656.789	163.398	742.369	659.982	194.825	759.056	587.64	180.169	730.835	497.422	-244.697	658.723	868.534	-209.816	738.37	643.465	-147.93	746.225	662.579	-155.334	756.737	584.663	-137.122	731.479	497.46
461	4.6	3.04826	1094.84	770.54	72.2742	1092.04	817.821	-68.2887	1102.74	808.636	147.851	958.368	875.127	-133.266	962.461	865.097	11.6315	910.325	807.332	256.116	640.399	878.433	232.136	738.278	656.881	163.442	742.312	660.09	194.831	759.039	587.686	180.214	730.801	497.458	-244.68	658.779	868.573	-210.303	738.598	642.105	-147.855	746.064	662.548	-155.784	757.898	582.571	-136.859	732.258	496.077
462	4.61	3.09623	1094.8	770.624	72.3281	1092.05	817.87	-68.2286	1102.71	808.665	147.922	958.343	875.175	-133.197	962.417	865.124	11.7294	910.188	807.582	256.143	640.38	878.425	232.217	738.245	656.971	163.499	742.288	660.138	194.842	759.038	587.691	180.269	730.791	497.515	-244.62	658.817	868.584	-210.419	738.685	641.815	-147.781	745.971	662.503	-155.858	758.167	582.054	-136.734	732.427	495.745
463	4.62	3.14956	1094.79	770.664	72.3582	1092.05	817.837	-68.1836	1102.71	808.597	147.957	958.324	875.165	-133.147	962.399	865.132	11.7814	910.172	807.603	256.151	640.388	878.431	232.258	738.235	656.981	163.533	742.283	660.103	194.851	759.037	587.675	180.302	730.797	497.527	-244.58	658.867	868.63	-210.438	738.706	641.719	-147.745	745.946	662.442	-155.872	758.214	581.91	-136.684	732.48	495.654
464	4.63	3.15061	1094.82	770.608	72.3559	1092.07	817.789	-68.1891	1102.75	808.581	147.961	958.328	875.161	-133.15	962.428	865.149	11.7714	910.235	807.516	256.135	640.394	878.454	232.246	738.254	656.951	163.53	742.306	660.089	194.862	759.045	587.671	180.278	730.811	497.52	-244.583	658.901	868.7	-210.447	738.709	641.698	-147.738	745.983	662.442	-155.897	758.264	581.878	-136.698	732.539	495.614
465	4.64	3.1034	1094.88	770.491	72.3288	1092.1	817.744	-68.227	1102.79	808.608	147.93	958.381	875.146	-133.19	962.485	865.175	11.6931	910.379	807.338	256.113	640.409	878.452	232.168	738.32	656.889	163.484	742.345	660.092	194.863	759.067	587.711	180.242	730.842	497.51	-244.593	658.878	868.685	-210.223	738.62	642.321	-147.778	746.108	662.456	-155.718	757.8	582.851	-136.84	732.257	496.238
466	4.65	3.027	1094.97	770.315	72.2883	1092.14	817.664	-68.2805	1102.79	808.637	147.86	958.417	875.069	-133.26	962.565	865.182	11.5926	910.537	807.102	256.098	640.416	878.455	232.078	738.412	656.799	163.408	742.454	659.96	194.835	759.086	587.684	180.194	730.889	497.469	-244.584	658.804	868.607	-209.744	738.412	643.645	-147.851	746.207	662.458	-155.245	756.646	584.962	-137.108	731.463	497.688
467	4.66	2.93376	1095.05	770.146	72.2427	1092.15	817.581	-68.3196	1102.79	808.612	147.813	958.437	875.031	-133.306	962.597	865.195	11.5205	910.628	806.998	256.078	640.399	878.435	232.014	738.451	656.746	163.319	742.525	659.856	194.816	759.082	587.632	180.137	730.932	497.399	-244.549	658.703	868.516	-209.673	738.367	643.97	-147.973	746.377	662.634	-155.14	756.325	585.471	-137.222	731.282	498.01
468	4.67	2.90984	1095.06	770.155	72.2134	1092.13	817.574	-68.3478	1102.76	808.644	147.796	958.42	875.039	-133.316	962.578	865.22	11.4912	910.645	806.946	256.073	640.377	878.435	231.992	738.446	656.745	163.3	742.508	659.882	194.801	759.082	587.634	180.123	730.919	497.393	-244.54	658.675	868.529	-209.66	738.334	644.064	-148.095	746.609	663.02	-155.153	756.236	585.638	-137.26	731.224	498.09
469	4.68	2.96857	1094.96	770.221	72.2204	1092.08	817.582	-68.3382	1102.73	808.613	147.827	958.37	875.071	-133.297	962.527	865.219	11.5184	910.57	807	256.077	640.364	878.453	232.021	738.388	656.764	163.34	742.442	659.92	194.784	759.065	587.601	180.15	730.873	497.396	-244.522	658.709	868.591	-209.629	738.282	644.102	-148.051	746.494	662.967	-155.157	756.212	585.65	-137.243	731.161	498.129
470	4.69	3.04775	1094.85	770.389	72.2612	1092.04	817.559	-68.2815	1102.72	808.577	147.905	958.33	875.133	-133.234	962.447	865.197	11.6107	910.397	807.183	256.092	640.317	878.417	232.104	738.312	656.827	163.42	742.366	659.993	194.787	759.053	587.582	180.21	730.823	497.451	-244.483	658.775	868.639	-209.796	738.346	643.533	-147.9	746.145	662.629	-155.329	756.718	584.707	-137.093	731.466	497.512
471	4.7	3.11808	1094.79	770.52	72.329	1092.01	817.598	-68.2007	1102.68	808.59	147.985	958.296	875.184	-133.133	962.401	865.232	11.7334	910.24	807.471	256.111	640.299	878.404	232.196	738.244	656.908	163.486	742.32	660.065	194.795	759.04	587.585	180.261	730.803	497.501	-244.454	658.822	868.668	-210.274	738.598	642.163	-147.779	745.984	662.495	-155.768	757.85	582.622	-136.82	732.251	496.074
472	4.71	3.1492	1094.77	770.573	72.3834	1091.99	817.664	-68.1391	1102.65	808.635	148.039	958.262	875.188	-133.07	962.394	865.23	11.8147	910.122	807.664	256.118	640.295	878.418	232.263	738.191	656.969	163.526	742.296	660.104	194.813	759.041	587.606	180.293	730.797	497.516	-244.437	658.818	868.669	-210.393	738.684	641.827	-147.715	745.922	662.441	-155.843	758.12	582.096	-136.721	732.429	495.709
473	4.72	3.1508	1094.78	770.538	72.3879	1092	817.68	-68.1295	1102.67	808.616	148.042	958.244	875.175	-133.068	962.402	865.24	11.8189	910.122	807.676	256.101	640.292	878.421	232.251	738.195	656.976	163.53	742.287	660.097	194.84	759.052	587.612	180.283	730.794	497.502	-244.432	658.818	868.666	-210.432	738.701	641.727	-147.715	745.955	662.383	-155.881	758.215	581.94	-136.717	732.51	495.589
474	4.73	3.11486	1094.81	770.488	72.3577	1092.02	817.622	-68.1824	1102.72	808.592	147.991	958.278	875.154	-133.118	962.435	865.256	11.7307	910.247	807.527	256.072	640.295	878.436	232.175	738.241	656.932	163.504	742.312	660.072	194.865	759.058	587.624	180.241	730.797	497.482	-244.461	658.795	868.631	-210.222	738.593	642.304	-147.796	746.175	662.559	-155.724	757.774	582.841	-136.854	732.213	496.196
475	4.74	3.07532	1094.89	770.399	72.325	1092.05	817.606	-68.2364	1102.76	808.597	147.926	958.328	875.12	-133.187	962.487	865.251	11.6133	910.458	807.234	256.041	640.307	878.458	232.08	738.299	656.872	163.426	742.383	660.019	194.885	759.067	587.711	180.208	730.831	497.479	-244.489	658.785	868.644	-209.739	738.393	643.676	-147.926	746.445	662.821	-155.268	756.656	584.968	-137.112	731.44	497.676
476	4.75	3.06745	1094.98	770.233	72.3036	1092.07	817.63	-68.2422	1102.78	808.612	147.89	958.372	875.124	-133.232	962.552	865.262	11.5846	910.578	807.044	256.018	640.312	878.471	232.031	738.357	656.815	163.373	742.46	659.975	194.892	759.067	587.773	180.174	730.887	497.451	-244.48	658.732	868.62	-209.637	738.376	643.995	-147.904	746.321	662.553	-155.15	756.367	585.499	-137.206	731.298	498.014
477	4.76	3.07907	1095.03	770.099	72.3425	1092.07	817.632	-68.2158	1102.8	808.561	147.892	958.384	875.125	-133.236	962.552	865.213	11.6115	910.599	806.998	256.002	640.285	878.45	232.035	738.396	656.803	163.38	742.457	659.985	194.891	759.075	587.762	180.17	730.91	497.408	-244.466	658.722	868.612	-209.597	738.373	644.053	-147.879	746.268	662.483	-155.116	756.301	585.599	-137.211	731.259	498.058
478	4.77	3.13946	1094.99	770.141	72.3944	1092.05	817.672	-68.1975	1102.79	808.535	147.916	958.356	875.098	-133.206	962.502	865.177	11.655	910.56	807.023	255.995	640.261	878.438	232.08	738.388	656.837	163.428	742.415	660.021	194.89	759.073	587.745	180.2	730.897	497.436	-244.487	658.751	868.669	-209.552	738.333	644.101	-147.832	746.199	662.461	-155.086	756.273	585.621	-137.175	731.196	498.098
479	4.78	3.19103	1094.9	770.271	72.421	1092.01	817.715	-68.1788	1102.76	808.501	147.949	958.305	875.133	-133.173	962.44	865.154	11.7143	910.384	807.229	255.993	640.249	878.457	232.136	738.341	656.895	163.474	742.34	660.095	194.877	759.046	587.731	180.232	730.855	497.482	-244.471	658.753	868.667	-209.738	738.384	643.511	-147.801	746.078	662.506	-155.288	756.763	584.68	-137.044	731.484	497.514
480	4.79	3.22847	1094.8	770.436	72.4169	1091.98	817.726	-68.1572	1102.71	808.508	147.971	958.245	875.18	-133.15	962.37	865.167	11.7584	910.174	807.525	255.999	640.238	878.456	232.161	738.253	656.915	163.494	742.271	660.141	194.863	759.024	587.701	180.248	730.809	497.504	-244.467	658.768	868.67	-210.247	738.593	642.167	-147.792	745.986	662.52	-155.77	757.88	582.611	-136.823	732.261	496.121
481	4.8	3.22113	1094.73	770.559	72.4034	1091.97	817.722	-68.1661	1102.66	808.549	147.97	958.21	875.2	-133.149	962.325	865.203	11.7635	910.045	807.75	256.01	640.253	878.44	232.17	738.202	656.955	163.479	742.252	660.152	194.827	759.036	587.673	180.247	730.78	497.499	-244.503	658.751	868.711	-210.38	738.611	641.828	-147.82	746.061	662.711	-155.891	758.135	582.13	-136.787	732.427	495.758
482	4.81	3.18953	1094.71	770.597	72.3832	1091.95	817.708	-68.1998	1102.65	808.562	147.944	958.21	875.195	-133.171	962.31	865.208	11.7376	910.029	807.703	256.024	640.278	878.448	232.164	738.174	656.971	163.453	742.247	660.125	194.805	759.037	587.663	180.225	730.777	497.47	-244.511	658.688	868.648	-210.434	738.621	641.741	-147.927	746.355	663.11	-155.936	758.214	581.999	-136.811	732.482	495.679
483	4.82	3.14411	1094.71	770.529	72.3496	1091.94	817.66	-68.2352	1102.65	808.543	147.91	958.229	875.127	-133.214	962.318	865.17	11.681	910.101	807.513	256.029	640.296	878.474	232.133	738.204	656.919	163.427	742.266	660.092	194.817	759.045	587.65	180.195	730.778	497.451	-244.501	658.66	868.64	-210.214	738.527	642.321	-147.982	746.494	663.195	-155.752	757.738	582.889	-136.934	732.174	496.27
484	4.83	3.10343	1094.77	770.303	72.3212	1091.97	817.563	-68.2519	1102.7	808.46	147.867	958.257	875.055	-133.245	962.372	865.139	11.6134	910.287	807.153	256.023	640.301	878.481	232.084	738.283	656.842	163.402	742.33	660.059	194.803	759.064	587.622	180.176	730.809	497.442	-244.469	658.646	868.621	-209.693	738.318	643.681	-147.943	746.473	663.002	-155.282	756.628	584.951	-137.149	731.396	497.683
485	4.84	3.07756	1094.87	770.096	72.3065	1092.05	817.506	-68.2672	1102.75	808.363	147.854	958.296	875.03	-133.257	962.411	865.136	11.5828	910.431	806.971	256.018	640.317	878.484	232.057	738.357	656.81	163.391	742.418	659.994	194.795	759.085	587.623	180.178	730.854	497.442	-244.455	658.664	868.639	-209.584	738.32	644.015	-147.886	746.26	662.6	-155.154	756.364	585.47	-137.206	731.254	498.022
486	4.85	3.07184	1094.94	769.994	72.3058	1092.07	817.51	-68.2715	1102.78	808.328	147.858	958.325	875.022	-133.262	962.43	865.108	11.5713	910.501	806.9	256.01	640.315	878.469	232.061	738.397	656.812	163.393	742.436	659.997	194.817	759.109	587.672	180.182	730.875	497.439	-244.436	658.711	868.664	-209.552	738.333	644.093	-147.881	746.197	662.538	-155.12	756.324	585.589	-137.217	731.231	498.058
487	4.86	3.06496	1094.92	769.922	72.2983	1092.07	817.455	-68.2619	1102.76	808.346	147.874	958.334	875.042	-133.243	962.403	865.087	11.6034	910.461	806.935	256.016	640.294	878.448	232.089	738.396	656.835	163.437	742.432	660.029	194.822	759.087	587.673	180.212	730.887	497.442	-244.421	658.73	868.707	-209.532	738.313	644.121	-147.866	746.154	662.54	-155.095	756.318	585.611	-137.2	731.207	498.083
488	4.87	3.06141	1094.85	769.942	72.3035	1092.05	817.438	-68.2592	1102.7	808.352	147.908	958.307	875.049	-133.217	962.355	865.115	11.6523	910.336	807.038	256.042	640.297	878.475	232.125	738.355	656.851	163.498	742.397	660.078	194.845	759.071	587.647	180.238	730.862	497.466	-244.414	658.676	868.712	-209.726	738.381	643.533	-147.796	746.088	662.493	-155.293	756.82	584.674	-137.081	731.538	497.492
489	4.88	3.04584	1094.74	770.103	72.2837	1092	817.441	-68.2917	1102.63	808.374	147.935	958.263	875.066	-133.205	962.302	865.157	11.677	910.176	807.234	256.052	640.263	878.459	232.165	738.276	656.907	163.516	742.345	660.089	194.851	759.064	587.622	180.243	730.823	497.494	-244.459	658.637	868.742	-210.236	738.573	642.193	-147.793	746.143	662.637	-155.783	757.93	582.612	-136.863	732.324	496.081
490	4.89	2.98391	1094.65	770.177	72.2216	1091.96	817.388	-68.3507	1102.56	808.384	147.921	958.217	875.047	-133.215	962.245	865.159	11.6661	910.049	807.358	256.06	640.241	878.447	232.155	738.213	656.918	163.498	742.283	660.116	194.871	759.057	587.619	180.237	730.786	497.519	-244.502	658.592	868.767	-210.399	738.591	641.853	-147.927	746.377	663.095	-155.925	758.179	582.114	-136.837	732.487	495.757
491	4.9	2.92135	1094.6	770.195	72.1749	1091.92	817.366	-68.3919	1102.54	808.414	147.903	958.204	875.024	-133.232	962.227	865.16	11.6212	910.011	807.329	256.076	640.247	878.455	232.133	738.191	656.886	163.471	742.239	660.138	194.861	759.053	587.634	180.215	730.753	497.505	-244.5	658.55	868.751	-210.437	738.585	641.764	-147.996	746.451	663.257	-155.974	758.234	581.989	-136.851	732.52	495.698
492	4.91	2.87872	1094.6	770.11	72.1471	1091.91	817.308	-68.4238	1102.56	808.384	147.879	958.207	874.98	-133.244	962.237	865.133	11.6049	910.061	807.247	256.081	640.269	878.461	232.125	738.218	656.906	163.442	742.254	660.14	194.855	759.05	587.663	180.201	730.766	497.469	-244.458	658.548	868.718	-210.215	738.503	642.354	-147.988	746.503	663.255	-155.771	757.767	582.896	-136.923	732.205	496.281
493	4.92	2.84009	1094.68	769.933	72.1449	1091.93	817.261	-68.4497	1102.59	808.345	147.84	958.24	874.946	-133.274	962.277	865.132	11.5828	910.134	807.2	256.07	640.294	878.498	232.101	738.26	656.914	163.431	742.295	660.123	194.849	759.053	587.693	180.209	730.81	497.472	-244.416	658.582	868.736	-209.705	738.313	643.739	-147.956	746.431	663.065	-155.291	756.653	584.972	-137.093	731.418	497.709
494	4.93	2.80318	1094.77	769.708	72.1446	1091.97	817.202	-68.4556	1102.65	808.257	147.812	958.277	874.916	-133.302	962.318	865.156	11.5522	910.233	807.042	256.045	640.29	878.501	232.09	738.313	656.89	163.423	742.323	660.08	194.837	759.074	587.709	180.215	730.854	497.485	-244.396	658.638	868.793	-209.574	738.279	644.067	-147.87	746.221	662.645	-155.161	756.403	585.476	-137.156	731.237	498.053
495	4.94	2.82539	1094.85	769.557	72.1377	1091.99	817.169	-68.4454	1102.67	808.178	147.816	958.294	874.861	-133.318	962.351	865.151	11.5468	910.314	806.852	256.01	640.283	878.487	232.103	738.36	656.88	163.424	742.361	660.088	194.818	759.073	587.683	180.216	730.88	497.47	-244.37	658.66	868.79	-209.537	738.288	644.122	-147.851	746.176	662.534	-155.126	756.35	585.565	-137.164	731.213	498.141
496	4.95	2.82831	1094.83	769.542	72.1109	1092	817.117	-68.437	1102.66	808.171	147.82	958.321	874.834	-133.329	962.354	865.146	11.5584	910.314	806.817	255.994	640.294	878.486	232.096	738.381	656.859	163.42	742.368	660.087	194.83	759.059	587.667	180.221	730.879	497.45	-244.33	658.664	868.751	-209.52	738.284	644.128	-147.856	746.119	662.551	-155.112	756.324	585.603	-137.159	731.205	498.171
497	4.96	2.77907	1094.76	769.613	72.0725	1091.97	817.107	-68.4741	1102.61	808.227	147.796	958.315	874.799	-133.358	962.323	865.119	11.5281	910.25	806.918	255.987	640.308	878.476	232.08	738.361	656.863	163.414	742.337	660.096	194.824	759.061	587.667	180.212	730.862	497.453	-244.374	658.634	868.735	-209.524	738.25	644.152	-147.909	746.209	662.742	-155.117	756.285	585.66	-137.174	731.165	498.164
498	4.97	2.73074	1094.66	769.69	72.0346	1091.93	817.092	-68.5213	1102.53	808.266	147.776	958.28	874.783	-133.383	962.26	865.113	11.4769	910.137	807.056	255.966	640.307	878.459	232.058	738.289	656.848	163.41	742.297	660.11	194.805	759.054	587.672	180.19	730.818	497.434	-244.432	658.539	868.698	-209.769	738.287	643.538	-147.994	746.44	663.119	-155.361	756.755	584.724	-137.125	731.469	497.529
499	4.98	2.70812	1094.57	769.867	72.0126	1091.89	817.111	-68.5524	1102.45	808.273	147.768	958.246	874.836	-133.403	962.194	865.132	11.4603	910.028	807.15	255.956	640.283	878.449	232.074	738.216	656.869	163.4	742.262	660.099	194.785	759.043	587.622	180.184	730.777	497.421	-244.467	658.471	868.699	-210.298	738.479	642.148	-148.038	746.446	663.258	-155.852	757.877	582.63	-136.948	732.258	496.11
500	4.99	2.7172	1094.55	769.961	71.9994	1091.88	817.152	-68.5684	1102.43	808.277	147.777	958.238	874.895	-133.404	962.179	865.182	11.4762	909.963	807.254	255.968	640.292	878.453	232.092	738.188	656.899	163.389	742.236	660.092	194.791	759.066	587.607	180.189	730.752	497.448	-244.477	658.426	868.687	-210.446	738.536	641.841	-148.038	746.447	663.321	-155.97	758.155	582.125	-136.884	732.453	495.769
501	5	2.73049	1094.58	769.908	72.0011	1091.95	817.138	-68.5705	1102.49	808.261	147.788	958.272	874.905	-133.387	962.2	865.197	11.4864	910.032	807.242	255.984	640.298	878.452	232.099	738.217	656.901	163.421	742.261	660.121	194.811	759.086	587.621	180.211	730.773	497.464	-244.45	658.443	868.69	-210.233	738.477	642.386	-147.967	746.384	663.114	-155.798	757.743	582.949	-136.94	732.161	496.326
502	5.01	2.75933	1094.7	769.649	72.0275	1092.04	817.079	-68.5318	1102.58	808.216	147.8	958.33	874.912	-133.355	962.254	865.185	11.5107	910.197	807.06	256.002	640.317	878.471	232.109	738.304	656.877	163.445	742.346	660.128	194.842	759.095	587.636	180.243	730.831	497.496	-244.406	658.551	868.76	-209.683	738.311	643.725	-147.84	746.169	662.668	-155.294	756.655	584.986	-137.098	731.409	497.743
503	5.02	2.76433	1094.82	769.417	72.0492	1092.09	817.044	-68.4934	1102.65	808.17	147.809	958.388	874.909	-133.337	962.335	865.197	11.5376	910.332	806.891	256.008	640.344	878.51	232.136	738.375	656.871	163.467	742.398	660.113	194.896	759.094	587.68	180.275	730.878	497.476	-244.337	658.606	868.768	-209.536	738.314	644.059	-147.782	746.174	662.505	-155.128	756.409	585.482	-137.109	731.295	498.068
504	5.03	2.74765	1094.86	769.416	72.054	1092.1	817.075	-68.4863	1102.68	808.142	147.807	958.41	874.943	-133.338	962.367	865.23	11.5208	910.382	806.828	256.003	640.361	878.535	232.127	738.414	656.872	163.473	742.409	660.114	194.931	759.104	587.723	180.273	730.908	497.464	-244.324	658.656	868.848	-209.512	738.313	644.152	-147.766	746.188	662.47	-155.084	756.348	585.618	-137.102	731.278	498.14
505	5.04	2.73686	1094.84	769.492	72.0626	1092.08	817.14	-68.4976	1102.69	808.124	147.807	958.399	874.976	-133.35	962.341	865.245	11.5239	910.361	806.909	255.987	640.369	878.564	232.122	738.397	656.881	163.47	742.408	660.12	194.931	759.097	587.741	180.268	730.889	497.468	-244.338	658.627	868.86	-209.493	738.286	644.188	-147.788	746.162	662.509	-155.085	756.322	585.677	-137.121	731.214	498.204
506	5.05	2.71299	1094.77	769.64	72.045	1092.05	817.183	-68.5217	1102.65	808.172	147.789	958.382	875.003	-133.352	962.317	865.271	11.5259	910.262	807.087	255.975	640.367	878.552	232.104	738.357	656.888	163.446	742.372	660.102	194.909	759.085	587.765	180.259	730.856	497.462	-244.351	658.574	868.787	-209.492	738.239	644.196	-147.791	746.123	662.514	-155.104	756.306	585.668	-137.131	731.155	498.216
507	5.06	2.65213	1094.67	769.795	72.0017	1092.01	817.188	-68.5551	1102.57	808.258	147.783	958.344	874.999	-133.353	962.276	865.276	11.4971	910.126	807.219	255.973	640.369	878.528	232.087	738.305	656.87	163.44	742.315	660.121	194.878	759.071	587.747	180.228	730.823	497.447	-244.391	658.563	868.803	-209.737	738.302	643.588	-147.855	746.187	662.7	-155.346	756.78	584.753	-137.065	731.464	497.571
508	5.07	2.62586	1094.62	769.916	71.9644	1091.98	817.181	-68.593	1102.5	808.343	147.8	958.302	875.034	-133.348	962.223	865.285	11.509	910.029	807.396	255.998	640.374	878.52	232.091	738.249	656.87	163.425	742.257	660.149	194.838	759.042	587.667	180.211	730.77	497.446	-244.418	658.506	868.781	-210.279	738.506	642.196	-147.94	746.263	662.999	-155.837	757.875	582.66	-136.896	732.255	496.131
509	5.08	2.63877	1094.61	769.956	71.9626	1091.96	817.202	-68.6113	1102.46	808.369	147.817	958.261	875.071	-133.327	962.184	865.307	11.5441	909.986	807.493	255.999	640.328	878.49	232.093	738.218	656.905	163.417	742.233	660.148	194.805	759.037	587.617	180.216	730.749	497.451	-244.418	658.471	868.767	-210.43	738.557	641.875	-147.832	746.02	662.664	-155.96	758.135	582.158	-136.858	732.452	495.779
510	5.09	2.65348	1094.66	769.938	71.9674	1092	817.207	-68.618	1102.48	808.431	147.825	958.269	875.093	-133.313	962.172	865.35	11.5466	910.074	807.392	256.003	640.302	878.487	232.094	738.233	656.93	163.416	742.268	660.146	194.791	759.055	587.618	180.219	730.76	497.45	-244.395	658.492	868.791	-210.472	738.588	641.797	-147.85	745.985	662.61	-156.002	758.231	582.029	-136.851	732.53	495.689
511	5.1	2.67545	1094.72	769.956	71.9905	1092.06	817.262	-68.5987	1102.54	808.432	147.849	958.304	875.116	-133.301	962.196	865.38	11.5432	910.172	807.315	256.017	640.305	878.503	232.088	738.282	656.929	163.4	742.324	660.166	194.783	759.075	587.64	180.219	730.799	497.478	-244.344	658.524	868.791	-210.241	738.528	642.416	-147.899	746.011	662.643	-155.812	757.786	582.933	-136.93	732.226	496.298
512	5.11	2.70258	1094.81	769.803	72.0136	1092.12	817.282	-68.5747	1102.63	808.392	147.869	958.344	875.122	-133.277	962.249	865.378	11.564	910.254	807.231	256.025	640.312	878.494	232.076	738.338	656.912	163.413	742.393	660.121	194.784	759.097	587.633	180.241	730.861	497.495	-244.304	658.598	868.841	-209.702	738.346	643.76	-147.916	746.064	662.642	-155.314	756.685	585.013	-137.127	731.443	497.715
513	5.12	2.72363	1094.89	769.661	72.0303	1092.18	817.208	-68.5358	1102.68	808.372	147.874	958.386	875.081	-133.265	962.305	865.361	11.5863	910.355	807.062	256.034	640.337	878.508	232.079	738.395	656.853	163.424	742.464	660.016	194.812	759.112	587.631	180.25	730.907	497.47	-244.258	658.639	868.849	-209.573	738.339	644.037	-147.888	746.143	662.587	-155.153	756.427	585.484	-137.181	731.302	498.051
514	5.13	2.72742	1094.91	769.716	72.0503	1092.18	817.219	-68.5051	1102.68	808.364	147.886	958.38	875.054	-133.26	962.306	865.323	11.5833	910.404	806.972	256.043	640.348	878.543	232.071	738.412	656.816	163.405	742.483	659.958	194.842	759.116	587.63	180.234	730.917	497.446	-244.247	658.622	868.859	-209.545	738.328	644.111	-147.893	746.296	662.71	-155.097	756.34	585.572	-137.179	731.274	498.121
515	5.14	2.74153	1094.84	769.864	72.0881	1092.15	817.27	-68.4837	1102.64	808.369	147.91	958.338	875.081	-133.232	962.263	865.355	11.6279	910.307	807.124	256.028	640.339	878.556	232.069	738.364	656.814	163.422	742.426	660.024	194.875	759.09	587.649	180.219	730.878	497.439	-244.24	658.536	868.822	-209.523	738.263	644.158	-147.941	746.545	663.034	-155.092	756.281	585.632	-137.166	731.219	498.144
516	5.15	2.78887	1094.76	769.982	72.1214	1092.09	817.338	-68.4742	1102.61	808.436	147.933	958.285	875.137	-133.198	962.21	865.413	11.6626	910.17	807.319	256.026	640.302	878.519	232.084	738.287	656.829	163.451	742.354	660.065	194.9	759.073	587.682	180.23	730.841	497.461	-244.204	658.44	868.749	-209.505	738.183	644.183	-147.935	746.537	663.153	-155.102	756.234	585.665	-137.15	731.128	498.202
517	5.16	2.86668	1094.71	770.184	72.1716	1092.08	817.369	-68.4441	1102.59	808.537	147.982	958.269	875.211	-133.167	962.17	865.418	11.7099	910.017	807.538	256.056	640.283	878.519	232.112	738.23	656.877	163.481	742.301	660.144	194.889	759.072	587.693	180.23	730.81	497.488	-244.2	658.448	868.783	-209.719	738.268	643.634	-147.945	746.49	663.284	-155.32	756.731	584.76	-137.032	731.444	497.586
518	5.17	2.93528	1094.69	770.313	72.2077	1092.08	817.422	-68.4032	1102.57	808.541	148.055	958.264	875.276	-133.118	962.158	865.413	11.7954	909.913	807.78	256.091	640.263	878.519	232.164	738.196	656.959	163.489	742.28	660.186	194.879	759.07	587.698	180.247	730.805	497.528	-244.192	658.487	868.828	-210.235	738.536	642.299	-147.895	746.324	663.192	-155.788	757.88	582.677	-136.837	732.253	496.168
519	5.18	3.01356	1094.72	770.239	72.2744	1092.07	817.435	-68.3415	1102.6	808.463	148.112	958.258	875.25	-133.059	962.15	865.398	11.8766	909.949	807.687	256.124	640.237	878.497	232.218	738.198	656.968	163.523	742.297	660.168	194.904	759.087	587.706	180.284	730.8	497.549	-244.157	658.49	868.808	-210.356	738.606	641.952	-147.752	746.044	662.708	-155.89	758.174	582.141	-136.776	732.482	495.751
520	5.19	3.06521	1094.79	770.07	72.3377	1092.1	817.384	-68.2794	1102.65	808.351	148.131	958.263	875.207	-133.029	962.155	865.363	11.886	910.071	807.418	256.122	640.196	878.477	232.219	738.243	656.938	163.542	742.338	660.102	194.928	759.089	587.715	180.308	730.821	497.538	-244.125	658.497	868.815	-210.147	738.526	642.476	-147.701	746.006	662.513	-155.711	757.737	582.973	-136.832	732.198	496.259
521	5.2	3.08679	1094.82	770.031	72.3554	1092.11	817.386	-68.2611	1102.69	808.385	148.119	958.29	875.228	-133.036	962.188	865.357	11.8791	910.145	807.309	256.109	640.201	878.505	232.196	738.274	656.944	163.529	742.364	660.114	194.951	759.095	587.741	180.3	730.852	497.53	-244.125	658.546	868.873	-209.64	738.291	643.829	-147.714	746.053	662.477	-155.259	756.65	585.044	-137.046	731.393	497.742
522	5.21	3.07564	1094.83	770.033	72.3337	1092.1	817.385	-68.2721	1102.69	808.401	148.076	958.323	875.224	-133.083	962.227	865.344	11.793	910.22	807.232	256.089	640.214	878.503	232.127	738.302	656.912	163.48	742.377	660.157	194.907	759.1	587.747	180.256	730.867	497.524	-244.167	658.576	868.922	-209.55	738.26	644.137	-147.826	746.224	662.695	-155.174	756.384	585.547	-137.146	731.241	498.116
523	5.22	3.03801	1094.84	769.913	72.3135	1092.09	817.322	-68.2761	1102.68	808.331	148.02	958.333	875.154	-133.125	962.279	865.34	11.7145	910.265	807.109	256.062	640.249	878.502	232.066	738.324	656.852	163.418	742.399	660.107	194.861	759.096	587.75	180.203	730.879	497.47	-244.145	658.508	868.775	-209.555	738.279	644.161	-147.946	746.416	662.956	-155.156	756.309	585.661	-137.19	731.233	498.138
524	5.23	3.0355	1094.81	769.898	72.3174	1092.04	817.267	-68.2504	1102.66	808.303	148	958.309	875.078	-133.109	962.287	865.349	11.7214	910.219	807.121	256.056	640.278	878.524	232.035	738.317	656.836	163.376	742.37	660.042	194.864	759.083	587.756	180.175	730.869	497.439	-244.126	658.465	868.698	-209.552	738.272	644.18	-147.922	746.33	662.834	-155.141	756.258	585.685	-137.223	731.205	498.175
525	5.24	3.06264	1094.73	770	72.3617	1092.02	817.242	-68.2257	1102.63	808.307	148.046	958.265	875.084	-133.081	962.249	865.319	11.7757	910.085	807.302	256.057	640.264	878.535	232.065	738.271	656.861	163.424	742.331	660.083	194.887	759.058	587.725	180.192	730.842	497.424	-244.134	658.442	868.676	-209.516	738.229	644.203	-147.926	746.364	662.954	-155.122	756.233	585.671	-137.197	731.141	498.203
526	5.25	3.13699	1094.69	770.032	72.4306	1091.99	817.272	-68.1728	1102.61	808.267	148.1	958.224	875.118	-133.024	962.202	865.321	11.8611	909.982	807.443	256.047	640.212	878.503	232.129	738.219	656.893	163.477	742.298	660.133	194.904	759.036	587.707	180.228	730.82	497.445	-244.137	658.483	868.715	-209.717	738.296	643.594	-147.789	746.069	662.588	-155.311	756.73	584.735	-137.051	731.458	497.53
527	5.26	3.22685	1094.69	769.999	72.4641	1091.98	817.267	-68.1181	1102.58	808.245	148.163	958.2	875.154	-132.976	962.175	865.317	11.9426	909.904	807.558	256.058	640.164	878.476	232.178	738.196	656.934	163.508	742.279	660.171	194.878	759.043	587.687	180.264	730.811	497.476	-244.129	658.536	868.777	-210.226	738.538	642.181	-147.756	745.953	662.515	-155.775	757.861	582.666	-136.829	732.299	496.07
528	5.27	3.23968	1094.67	770.048	72.476	1091.99	817.259	-68.0942	1102.56	808.257	148.208	958.203	875.176	-132.967	962.188	865.342	11.9553	909.884	807.631	256.082	640.138	878.457	232.177	738.193	656.943	163.513	742.301	660.176	194.849	759.08	587.659	180.272	730.816	497.49	-244.145	658.556	868.824	-210.366	738.626	641.887	-147.777	745.935	662.557	-155.903	758.155	582.16	-136.786	732.506	495.769
529	5.28	3.22855	1094.66	769.995	72.4861	1092.01	817.207	-68.1111	1102.57	808.23	148.205	958.192	875.167	-132.97	962.197	865.322	11.9318	909.937	807.597	256.09	640.117	878.461	232.188	738.208	656.967	163.505	742.335	660.155	194.876	759.12	587.689	180.275	730.825	497.506	-244.141	658.55	868.823	-210.407	738.662	641.854	-147.791	745.976	662.604	-155.938	758.251	582.038	-136.789	732.572	495.675
530	5.29	3.21237	1094.66	769.856	72.5049	1091.99	817.119	-68.1133	1102.58	808.148	148.201	958.17	875.154	-132.979	962.193	865.257	11.9161	909.993	807.476	256.077	640.106	878.468	232.174	738.236	656.954	163.49	742.337	660.145	194.892	759.126	587.694	180.27	730.835	497.527	-244.147	658.525	868.806	-210.188	738.555	642.421	-147.815	746.134	662.734	-155.742	757.785	582.896	-136.886	732.219	496.265
531	5.3	3.18565	1094.67	769.816	72.3495	1091.87	817.827	-68.1228	1102.58	808.108	148.177	958.161	875.103	-132.997	962.208	865.272	11.8691	910.028	807.357	256.035	640.09	878.469	232.129	738.261	656.931	163.454	742.346	660.134	194.916	759.128	587.694	180.256	730.829	497.519	-244.176	658.487	868.779	-209.689	738.326	643.759	-147.937	746.456	663.105	-155.292	756.637	584.989	-137.096	731.378	497.725
532	5.31	3.15098	1094.69	769.722	71.9914	1091.59	819.465	-68.1144	1102.58	808.117	148.13	958.173	875.056	-133.024	962.245	865.284	11.796	910.101	807.241	255.991	640.085	878.49	232.099	738.284	656.918	163.419	742.399	660.087	194.942	759.143	587.715	180.226	730.842	497.512	-244.206	658.482	868.779	-209.583	738.291	644.083	-148.003	746.589	663.23	-155.169	756.342	585.541	-137.173	731.223	498.112
533	5.32	3.14246	1094.69	769.662	71.9078	1091.52	819.783	-68.1026	1102.61	808.045	148.104	958.197	875.039	-133.039	962.283	865.21	11.778	910.152	807.141	255.946	640.106	878.5	232.078	738.304	656.866	163.414	742.418	660.04	194.95	759.142	587.719	180.227	730.87	497.484	-244.187	658.484	868.74	-209.546	738.294	644.14	-147.946	746.528	663.025	-155.119	756.272	585.662	-137.178	731.21	498.171
534	5.33	3.16831	1094.66	769.615	71.9086	1091.46	819.913	-68.0824	1102.62	807.985	148.109	958.193	875.02	-133.026	962.278	865.19	11.8082	910.076	807.204	255.916	640.118	878.499	232.09	738.29	656.86	163.448	742.4	660.06	194.946	759.133	587.719	180.248	730.874	497.453	-244.173	658.53	868.742	-209.509	738.269	644.17	-147.813	746.239	662.617	-155.097	756.253	585.664	-137.151	731.182	498.165
535	5.34	3.21909	1094.63	769.693	71.9357	1091.44	819.955	-68.0505	1102.59	808.005	148.125	958.164	875.039	-133.007	962.251	865.198	11.8512	909.988	807.334	255.883	640.1	878.504	232.121	738.248	656.906	163.488	742.341	660.149	194.939	759.106	587.716	180.263	730.858	497.445	-244.187	658.588	868.794	-209.707	738.346	643.584	-147.752	746.09	662.502	-155.316	756.778	584.721	-137.016	731.51	497.549
536	5.35	3.26143	1094.58	769.761	71.9555	1091.41	819.997	-68.0175	1102.53	807.979	148.146	958.138	875.076	-132.984	962.209	865.24	11.9068	909.907	807.496	255.875	640.079	878.524	232.17	738.203	656.942	163.512	742.286	660.185	194.928	759.086	587.711	180.306	730.84	497.501	-244.179	658.636	868.868	-210.228	738.585	642.236	-147.729	746.002	662.487	-155.795	757.914	582.64	-136.787	732.321	496.107
537	5.36	3.28519	1094.54	769.833	71.9433	1091.38	820.02	-68.0149	1102.49	807.965	148.156	958.121	875.083	-132.981	962.176	865.251	11.9433	909.834	807.615	255.892	640.043	878.515	232.197	738.167	656.977	163.517	742.261	660.176	194.916	759.094	587.706	180.343	730.824	497.544	-244.165	658.608	868.858	-210.359	738.638	641.897	-147.733	745.959	662.498	-155.892	758.181	582.144	-136.73	732.5	495.741
538	5.37	3.23961	1094.56	769.782	71.8993	1091.39	819.976	-68.0654	1102.48	807.99	148.136	958.114	875.058	-133.008	962.177	865.264	11.898	909.841	807.587	255.897	640.017	878.495	232.175	738.159	656.987	163.49	742.265	660.19	194.898	759.1	587.712	180.33	730.814	497.543	-244.184	658.575	868.799	-210.418	738.641	641.815	-147.84	746.088	662.755	-155.948	758.262	582.013	-136.765	732.555	495.673
539	5.38	3.15062	1094.57	769.65	71.8414	1091.38	819.939	-68.1177	1102.49	808.023	148.101	958.125	875.025	-133.052	962.188	865.281	11.801	909.903	807.464	255.906	640.022	878.488	232.119	738.184	656.94	163.442	742.287	660.2	194.897	759.123	587.717	180.303	730.809	497.527	-244.257	658.542	868.834	-210.227	738.523	642.418	-147.945	746.299	663.043	-155.788	757.762	582.939	-136.899	732.216	496.336
540	5.39	3.08982	1094.58	769.515	71.8036	1091.37	819.922	-68.1703	1102.5	808.005	148.063	958.132	874.99	-133.093	962.183	865.256	11.7442	909.937	807.366	255.914	640.062	878.506	232.069	738.211	656.893	163.428	742.309	660.187	194.905	759.127	587.724	180.277	730.809	497.51	-244.274	658.465	868.817	-209.72	738.277	643.806	-147.885	746.138	662.712	-155.322	756.595	585.056	-137.129	731.389	497.774
541	5.4	3.04239	1094.56	769.464	71.7787	1091.37	819.84	-68.2094	1102.49	807.972	148.018	958.147	874.975	-133.123	962.171	865.236	11.6843	909.985	807.217	255.915	640.089	878.521	232.04	738.239	656.884	163.386	742.327	660.115	194.91	759.124	587.719	180.264	730.813	497.476	-244.25	658.429	868.796	-209.609	738.225	644.132	-147.921	746.234	662.788	-155.202	756.31	585.546	-137.206	731.201	498.107
542	5.41	2.99445	1094.58	769.372	71.7367	1091.36	819.799	-68.2316	1102.49	807.953	147.979	958.153	874.947	-133.149	962.173	865.202	11.6352	910.032	807.112	255.915	640.102	878.519	232.02	738.253	656.855	163.369	742.334	660.112	194.896	759.116	587.686	180.251	730.832	497.461	-244.241	658.438	868.786	-209.584	738.221	644.216	-148.035	746.503	663.149	-155.173	756.256	585.643	-137.222	731.171	498.19
543	5.42	3.00254	1094.59	769.363	71.7305	1091.38	819.756	-68.2164	1102.49	807.934	147.981	958.173	874.942	-133.136	962.179	865.221	11.6629	910.025	807.173	255.938	640.14	878.529	232.054	738.26	656.862	163.407	742.334	660.127	194.893	759.109	587.694	180.264	730.839	497.456	-244.204	658.473	868.794	-209.554	738.232	644.228	-147.994	746.43	663.065	-155.147	756.261	585.691	-137.198	731.175	498.186
544	5.43	3.05729	1094.61	769.306	71.7538	1091.41	819.705	-68.1831	1102.48	807.884	148.035	958.18	874.97	-133.094	962.164	865.236	11.7493	909.967	807.246	255.972	640.16	878.541	232.142	738.246	656.909	163.477	742.336	660.135	194.919	759.101	587.717	180.316	730.863	497.465	-244.145	658.544	868.848	-209.72	738.348	643.632	-147.825	746.129	662.666	-155.315	756.783	584.757	-137.035	731.537	497.512
545	5.44	3.07784	1094.6	769.284	71.7852	1091.42	819.675	-68.1599	1102.44	807.851	148.073	958.167	874.981	-133.056	962.14	865.207	11.8421	909.877	807.395	256.003	640.16	878.537	232.2	738.239	656.916	163.538	742.333	660.153	194.958	759.104	587.73	180.373	730.861	497.491	-244.11	658.565	868.855	-210.19	738.583	642.258	-147.742	746.019	662.523	-155.754	757.92	582.628	-136.772	732.364	496.05
546	5.45	3.0733	1094.57	769.349	71.7823	1091.41	819.741	-68.1594	1102.41	807.858	148.09	958.165	875.026	-133.056	962.111	865.232	11.8881	909.827	807.533	256.02	640.128	878.503	232.244	738.218	656.961	163.578	742.342	660.163	194.999	759.121	587.769	180.413	730.837	497.533	-244.123	658.519	868.832	-210.309	738.644	641.89	-147.701	745.987	662.482	-155.864	758.192	582.109	-136.702	732.573	495.703
547	5.46	3.01751	1094.55	769.36	71.7198	1091.4	819.763	-68.2294	1102.39	807.91	148.071	958.146	875.053	-133.08	962.081	865.263	11.8439	909.833	807.528	256.027	640.108	878.479	232.238	738.213	656.987	163.563	742.349	660.158	195.003	759.146	587.8	180.4	730.821	497.556	-244.187	658.488	868.872	-210.144	738.551	642.417	-147.708	746.005	662.514	-155.715	757.756	582.961	-136.791	732.233	496.283
548	5.47	2.88674	1094.56	769.269	71.7805	1091.51	818.947	-68.3328	1102.38	807.976	148.004	958.146	875.014	-133.118	962.056	865.237	11.7584	909.904	807.427	256.027	640.098	878.45	232.174	738.237	656.95	163.512	742.365	660.152	194.994	759.153	587.773	180.379	730.824	497.581	-244.25	658.421	868.867	-209.682	738.309	643.785	-147.751	746.062	662.55	-155.285	756.637	585.072	-137.034	731.396	497.769
549	5.48	2.78216	1094.54	769.26	72.0328	1091.76	817.235	-68.4342	1102.36	808.022	147.936	958.151	874.983	-133.186	962.051	865.236	11.6683	909.93	807.372	256.01	640.093	878.425	232.116	738.254	656.925	163.47	742.376	660.151	194.971	759.166	587.76	180.34	730.819	497.556	-244.288	658.343	868.827	-209.588	738.251	644.122	-147.852	746.204	662.763	-155.199	756.335	585.64	-137.161	731.214	498.151
550	5.49	2.7301	1094.51	769.357	71.8986	1091.68	817.597	-68.4925	1102.34	808.036	147.89	958.143	874.967	-133.238	962.049	865.221	11.5977	909.914	807.369	255.986	640.099	878.446	232.089	738.262	656.931	163.431	742.355	660.116	194.95	759.157	587.738	180.306	730.817	497.516	-244.314	658.314	868.8	-209.578	738.227	644.206	-148.001	746.469	663.189	-155.185	756.25	585.737	-137.203	731.16	498.209
551	5.5	2.69799	1094.49	769.36	71.696	1091.52	818.51	-68.5241	1102.34	807.997	147.85	958.136	874.957	-133.273	962.04	865.24	11.5896	909.883	807.435	255.948	640.104	878.469	232.052	738.258	656.868	163.403	742.34	660.089	194.903	759.123	587.693	180.286	730.817	497.478	-244.282	658.309	868.802	-209.574	738.202	644.232	-148.039	746.525	663.301	-155.176	756.237	585.72	-137.183	731.123	498.212
552	5.51	2.69765	1094.51	769.26	71.965	1091.75	817.144	-68.5007	1102.33	807.974	147.831	958.135	874.985	-133.275	962.029	865.256	11.5942	909.877	807.426	255.938	640.151	878.53	232.069	738.255	656.866	163.419	742.332	660.118	194.859	759.086	587.645	180.293	730.825	497.457	-244.223	658.346	868.816	-209.773	738.293	643.603	-147.989	746.382	663.141	-155.35	756.768	584.773	-137.07	731.491	497.579
553	5.52	2.74006	1094.54	769.269	72.0575	1091.82	816.849	-68.4535	1102.35	807.935	147.863	958.136	875.022	-133.259	962.037	865.26	11.6427	909.863	807.471	255.926	640.182	878.582	232.115	738.24	656.911	163.423	742.321	660.125	194.836	759.071	587.64	180.343	730.844	497.481	-244.216	658.481	868.957	-210.253	738.547	642.235	-147.872	746.054	662.713	-155.792	757.943	582.635	-136.827	732.353	496.077
554	5.53	2.80031	1094.55	769.331	72.0967	1091.83	816.856	-68.429	1102.38	807.906	147.883	958.152	875.08	-133.254	962.051	865.268	11.6984	909.853	807.56	255.908	640.18	878.576	232.155	738.231	656.949	163.464	742.318	660.152	194.86	759.089	587.664	180.386	730.852	497.511	-244.195	658.538	868.979	-210.355	738.63	641.921	-147.83	745.962	662.597	-155.88	758.224	582.132	-136.715	732.553	495.699
555	5.54	2.80769	1094.57	769.247	72.094	1091.85	816.823	-68.4402	1102.39	807.888	147.874	958.166	875.104	-133.256	962.05	865.252	11.6969	909.895	807.482	255.903	640.179	878.574	232.169	738.239	656.932	163.501	742.329	660.157	194.9	759.102	587.68	180.401	730.849	497.479	-244.199	658.529	868.971	-210.15	738.531	642.43	-147.791	745.963	662.541	-155.677	757.801	582.929	-136.773	732.232	496.251
556	5.55	2.77443	1094.57	769.257	72.0605	1091.84	816.8	-68.4631	1102.39	807.895	147.845	958.17	875.118	-133.29	962.049	865.231	11.6319	909.979	807.382	255.889	640.161	878.573	232.155	738.252	656.926	163.503	742.335	660.151	194.942	759.1	587.672	180.413	730.829	497.497	-244.259	658.486	868.962	-209.637	738.284	643.79	-147.774	746.021	662.482	-155.233	756.656	584.99	-136.977	731.375	497.697
557	5.56	2.70927	1094.56	769.359	72.0109	1091.82	816.887	-68.5439	1102.38	807.962	147.788	958.166	875.153	-133.364	962.055	865.223	11.5535	910.027	807.404	255.879	640.138	878.541	232.1	738.257	656.934	163.446	742.346	660.168	194.971	759.111	587.704	180.403	730.806	497.526	-244.357	658.383	868.928	-209.555	738.229	644.138	-147.868	746.194	662.736	-155.153	756.334	585.548	-137.081	731.201	498.109
558	5.57	2.62621	1094.54	769.359	71.943	1091.82	816.922	-68.6114	1102.36	808.036	147.718	958.175	875.171	-133.437	962.07	865.278	11.4669	910.075	807.505	255.869	640.127	878.524	232.042	738.253	656.937	163.405	742.36	660.162	194.978	759.139	587.797	180.378	730.791	497.568	-244.426	658.272	868.865	-209.592	738.219	644.221	-148.025	746.463	663.202	-155.176	756.246	585.76	-137.154	731.162	498.256
559	5.58	2.59722	1094.53	769.427	71.9048	1091.83	816.95	-68.6483	1102.35	808.066	147.69	958.197	875.218	-133.479	962.069	865.311	11.3937	910.117	807.575	255.86	640.146	878.536	232.026	738.26	656.943	163.374	742.378	660.137	194.956	759.143	587.817	180.366	730.8	497.575	-244.446	658.256	868.85	-209.598	738.219	644.254	-148.063	746.521	663.304	-155.164	756.216	585.839	-137.202	731.136	498.297
560	5.59	2.64396	1094.51	769.476	71.945	1091.83	817.035	-68.6263	1102.35	808.074	147.697	958.218	875.261	-133.47	962.058	865.316	11.4335	910.075	807.664	255.839	640.177	878.556	232.075	738.259	656.959	163.406	742.331	660.192	194.943	759.127	587.795	180.396	730.797	497.564	-244.418	658.295	868.848	-209.782	738.302	643.646	-147.989	746.415	663.154	-155.34	756.75	584.875	-137.071	731.49	497.653
561	5.6	2.70575	1094.5	769.539	71.9923	1091.85	817.111	-68.5719	1102.35	808.055	147.707	958.231	875.266	-133.442	962.056	865.306	11.532	909.988	807.783	255.806	640.213	878.585	232.134	738.245	656.981	163.46	742.292	660.252	194.957	759.105	587.778	180.444	730.809	497.575	-244.393	658.39	868.9	-210.263	738.541	642.263	-147.824	746.108	662.719	-155.775	757.908	582.698	-136.787	732.316	496.184
562	5.61	2.75842	1094.54	769.556	71.9926	1091.88	817.096	-68.5455	1102.36	808.034	147.73	958.237	875.294	-133.423	962.072	865.302	11.5851	909.955	807.854	255.785	640.287	878.626	232.18	738.227	657.017	163.497	742.295	660.269	194.958	759.087	587.757	180.485	730.829	497.54	-244.363	658.504	868.926	-210.369	738.637	641.91	-147.727	745.978	662.529	-155.843	758.199	582.119	-136.655	732.54	495.757
563	5.62	2.74951	1094.55	769.516	71.9598	1091.89	817.068	-68.5426	1102.38	808.027	147.732	958.247	875.324	-133.423	962.078	865.321	11.6038	909.915	807.956	255.762	640.338	878.663	232.182	738.224	657.027	163.494	742.29	660.244	194.931	759.074	587.742	180.494	730.835	497.494	-244.333	658.524	868.884	-210.388	738.675	641.789	-147.714	745.934	662.493	-155.85	758.287	581.977	-136.598	732.612	495.62
564	5.63	2.69064	1094.53	769.55	71.9251	1091.9	817.13	-68.5829	1102.39	808.049	147.689	958.253	875.336	-133.462	962.083	865.328	11.575	909.912	808.028	255.758	640.365	878.68	232.146	738.232	656.986	163.471	742.287	660.243	194.895	759.074	587.703	180.493	730.832	497.525	-244.374	658.525	868.918	-210.415	738.665	641.751	-147.76	745.963	662.544	-155.889	758.285	581.985	-136.637	732.627	495.621
565	5.64	2.56896	1094.52	769.561	71.8148	1091.89	817.105	-68.6856	1102.37	808.086	147.626	958.255	875.312	-133.543	962.098	865.299	11.4543	909.99	807.938	255.765	640.356	878.686	232.071	738.243	656.951	163.426	742.313	660.23	194.871	759.081	587.701	180.471	730.828	497.536	-244.449	658.463	868.927	-210.221	738.531	642.37	-147.863	746.124	662.74	-155.718	757.767	582.92	-136.808	732.263	496.28
566	5.65	2.43618	1094.54	769.454	71.6597	1091.91	816.985	-68.7955	1102.36	808.119	147.557	958.274	875.296	-133.619	962.114	865.285	11.3263	910.143	807.695	255.773	640.321	878.656	231.99	738.27	656.903	163.326	742.367	660.117	194.859	759.089	587.7	180.424	730.82	497.507	-244.509	658.375	868.883	-209.759	738.297	643.744	-148.062	746.455	663.159	-155.283	756.599	585.032	-137.059	731.435	497.74
567	5.66	2.32909	1094.59	769.429	71.5738	1091.94	816.953	-68.8869	1102.34	808.148	147.525	958.286	875.317	-133.678	962.146	865.323	11.2306	910.277	807.577	255.791	640.295	878.658	231.95	738.292	656.895	163.259	742.405	660.045	194.841	759.101	587.691	180.397	730.818	497.511	-244.527	658.343	868.878	-209.688	738.254	644.083	-148.138	746.554	663.24	-155.205	756.304	585.555	-137.184	731.241	498.134
568	5.67	2.27619	1094.65	769.384	71.5432	1091.98	816.969	-68.9184	1102.32	808.188	147.526	958.3	875.352	-133.689	962.152	865.366	11.212	910.349	807.621	255.803	640.283	878.686	231.951	738.311	656.932	163.27	742.419	660.064	194.82	759.109	587.697	180.427	730.816	497.534	-244.541	658.328	868.884	-209.658	738.248	644.178	-148.153	746.595	663.277	-155.188	756.258	585.69	-137.203	731.187	498.237
569	5.68	2.31165	1094.63	769.461	71.5738	1091.99	817.034	-68.8963	1102.34	808.21	147.562	958.3	875.383	-133.659	962.143	865.372	11.2737	910.335	807.716	255.786	640.275	878.687	231.988	738.311	656.967	163.328	742.383	660.128	194.835	759.103	587.705	180.465	730.822	497.531	-244.512	658.378	868.888	-209.601	738.23	644.216	-148.092	746.441	663.164	-155.174	756.26	585.718	-137.131	731.16	498.255
570	5.69	2.40428	1094.58	769.589	71.6665	1091.96	817.132	-68.8362	1102.35	808.185	147.613	958.293	875.429	-133.589	962.13	865.377	11.3984	910.205	807.945	255.766	640.302	878.701	232.073	738.261	656.984	163.411	742.304	660.237	194.855	759.075	587.698	180.515	730.815	497.537	-244.489	658.475	868.932	-209.765	738.315	643.618	-147.917	746.071	662.772	-155.323	756.767	584.77	-136.954	731.478	497.596
571	5.7	2.48753	1094.5	769.765	71.7433	1091.92	817.225	-68.7771	1102.29	808.233	147.653	958.276	875.474	-133.536	962.11	865.39	11.4965	910.03	808.267	255.727	640.343	878.739	232.154	738.202	657.044	163.468	742.255	660.299	194.901	759.065	587.691	180.572	730.797	497.594	-244.476	658.533	868.961	-210.245	738.55	642.241	-147.781	745.912	662.609	-155.692	757.875	582.664	-136.688	732.247	496.165
572	5.71	2.50733	1094.41	769.875	71.7567	1091.88	817.242	-68.7491	1102.25	808.267	147.653	958.271	875.504	-133.542	962.096	865.42	11.5112	909.908	808.466	255.673	640.387	878.778	232.175	738.155	657.084	163.478	742.219	660.281	194.933	759.059	587.711	180.589	730.768	497.587	-244.51	658.537	868.964	-210.351	738.591	641.862	-147.762	745.988	662.755	-155.779	758.134	582.127	-136.592	732.414	495.783
573	5.72	2.44249	1094.38	769.866	71.7002	1091.85	817.189	-68.7685	1102.25	808.238	147.595	958.267	875.457	-133.589	962.101	865.395	11.4375	909.965	808.414	255.643	640.405	878.792	232.116	738.148	657.036	163.459	742.196	660.282	194.939	759.062	587.735	180.56	730.751	497.558	-244.539	658.463	868.842	-210.404	738.589	641.773	-147.897	746.307	663.209	-155.841	758.194	582.02	-136.6	732.463	495.679
574	5.73	2.34008	1094.43	769.736	71.6167	1091.86	817.096	-68.8411	1102.33	808.206	147.539	958.322	875.453	-133.648	962.159	865.381	11.3266	910.169	808.176	255.636	640.408	878.773	232.025	738.201	656.947	163.378	742.251	660.266	194.932	759.103	587.766	180.509	730.762	497.532	-244.564	658.412	868.781	-210.224	738.512	642.365	-147.98	746.469	663.263	-155.68	757.754	582.906	-136.773	732.192	496.295
575	5.74	2.25243	1094.54	769.598	71.5423	1091.93	817.024	-68.918	1102.39	808.21	147.496	958.411	875.493	-133.717	962.253	865.414	11.216	910.438	807.881	255.646	640.386	878.721	231.962	738.304	656.918	163.279	742.385	660.156	194.9	759.124	587.77	180.482	730.802	497.539	-244.576	658.404	868.723	-209.775	738.346	643.719	-148.08	746.598	663.284	-155.263	756.635	585.043	-137.058	731.454	497.775
576	5.75	2.22511	1094.72	769.277	71.4911	1092.02	816.918	-68.9353	1102.43	808.163	147.467	958.485	875.471	-133.746	962.352	865.452	11.158	910.64	807.689	255.662	640.37	878.697	231.96	738.389	656.942	163.213	742.524	660.012	194.905	759.111	587.758	180.464	730.859	497.503	-244.602	658.467	868.737	-209.689	738.355	644.033	-148.129	746.572	663.114	-155.156	756.357	585.602	-137.148	731.33	498.11
577	5.76	2.27722	1094.81	769.16	71.5069	1092.07	816.877	-68.9086	1102.46	808.126	147.492	958.516	875.47	-133.725	962.411	865.463	11.1803	910.742	807.648	255.673	640.357	878.716	231.989	738.435	656.947	163.229	742.578	659.995	194.909	759.113	587.762	180.481	730.9	497.497	-244.593	658.552	868.812	-209.641	738.353	644.105	-148.015	746.298	662.73	-155.112	756.296	585.707	-137.154	731.282	498.216
578	5.77	2.34607	1094.73	769.283	71.6037	1092.03	817	-68.868	1102.44	808.193	147.543	958.495	875.541	-133.69	962.397	865.495	11.2388	910.708	807.779	255.67	640.375	878.742	232.01	738.419	656.967	163.313	742.509	660.125	194.919	759.118	587.775	180.522	730.874	497.548	-244.585	658.597	868.858	-209.576	738.307	644.194	-147.945	746.161	662.683	-155.077	756.294	585.735	-137.084	731.227	498.253
579	5.78	2.41446	1094.58	769.588	71.6866	1091.96	817.172	-68.8434	1102.38	808.285	147.595	958.449	875.617	-133.656	962.336	865.513	11.3236	910.518	808.124	255.664	640.391	878.744	232.07	738.345	657.013	163.377	742.402	660.228	194.914	759.113	587.777	180.551	730.831	497.572	-244.559	658.613	868.814	-209.751	738.355	643.639	-147.882	746.033	662.681	-155.264	756.778	584.835	-136.923	731.503	497.651
580	5.79	2.45867	1094.42	769.88	71.725	1091.89	817.299	-68.8048	1102.25	808.343	147.625	958.4	875.664	-133.626	962.283	865.529	11.4203	910.265	808.571	255.644	640.431	878.765	232.121	738.24	657.052	163.406	742.307	660.29	194.911	759.109	587.769	180.563	730.788	497.574	-244.552	658.56	868.707	-210.269	738.565	642.257	-147.862	746.036	662.855	-155.702	757.837	582.717	-136.7	732.222	496.231
581	5.8	2.44984	1094.26	770.06	71.7195	1091.78	817.369	-68.7709	1102.14	808.422	147.623	958.348	875.687	-133.622	962.265	865.542	11.4258	910.077	808.879	255.622	640.487	878.815	232.106	738.151	657.036	163.424	742.231	660.299	194.904	759.092	587.712	180.56	730.733	497.574	-244.64	658.565	868.791	-210.401	738.578	641.911	-147.922	746.245	663.269	-155.792	758.082	582.174	-136.643	732.349	495.891
582	5.81	2.41798	1094.18	770.142	71.6864	1091.73	817.298	-68.7855	1102.14	808.413	147.597	958.324	875.696	-133.646	962.264	865.571	11.3762	910.074	808.896	255.603	640.511	878.84	232.06	738.122	656.96	163.4	742.182	660.266	194.889	759.071	587.665	180.513	730.713	497.536	-244.664	658.525	868.748	-210.449	738.563	641.819	-147.973	746.284	663.365	-155.845	758.134	582.019	-136.657	732.385	495.797
583	5.82	2.35829	1094.23	770.004	71.6491	1091.73	817.227	-68.8182	1102.21	808.326	147.541	958.327	875.65	-133.685	962.304	865.552	11.2809	910.28	808.598	255.605	640.493	878.84	231.991	738.16	656.898	163.348	742.215	660.24	194.879	759.079	587.648	180.461	730.725	497.486	-244.681	658.499	868.679	-210.245	738.467	642.401	-148.043	746.388	663.336	-155.708	757.666	582.932	-136.783	732.092	496.392
584	5.83	2.31248	1094.4	769.699	71.6185	1091.8	817.117	-68.8318	1102.31	808.236	147.507	958.402	875.623	-133.71	962.408	865.558	11.1971	910.598	808.234	255.609	640.46	878.827	231.956	738.28	656.9	163.31	742.337	660.202	194.867	759.098	587.676	180.453	730.777	497.463	-244.661	658.538	868.632	-209.75	738.285	643.753	-148.123	746.543	663.311	-155.266	756.585	585.035	-137.013	731.381	497.817
585	5.84	2.31239	1094.63	769.372	71.6005	1091.93	817.023	-68.8225	1102.4	808.225	147.513	958.514	875.647	-133.7	962.529	865.565	11.1821	910.858	808.085	255.638	640.433	878.827	231.958	738.41	656.944	163.255	742.512	660.106	194.861	759.138	587.715	180.492	730.866	497.518	-244.645	658.662	868.735	-209.644	738.342	644.051	-148.119	746.554	663.138	-155.144	756.368	585.591	-137.102	731.309	498.142
586	5.85	2.40179	1094.76	769.188	71.6745	1092.01	817.01	-68.77	1102.46	808.211	147.559	958.559	875.669	-133.661	962.594	865.542	11.2261	911.024	807.938	255.663	640.382	878.775	231.997	738.465	656.949	163.251	742.614	660.047	194.91	759.147	587.786	180.538	730.918	497.543	-244.599	658.767	868.787	-209.6	738.409	644.106	-148.025	746.334	662.731	-155.103	756.359	585.715	-137.097	731.34	498.174
587	5.86	2.53771	1094.73	769.198	71.7839	1091.97	817.074	-68.6822	1102.45	808.171	147.623	958.536	875.689	-133.598	962.597	865.525	11.294	911.076	807.933	255.644	640.328	878.732	232.051	738.453	656.94	163.334	742.576	660.08	194.95	759.148	587.778	180.585	730.924	497.543	-244.567	658.815	868.762	-209.548	738.396	644.117	-147.936	746.219	662.622	-155.06	756.337	585.703	-137.043	731.296	498.193
588	5.87	2.61736	1094.6	769.384	71.8859	1091.87	817.181	-68.6334	1102.4	808.186	147.672	958.478	875.743	-133.543	962.542	865.546	11.3491	910.943	808.224	255.624	640.318	878.752	232.093	738.396	656.973	163.423	742.46	660.18	194.975	759.141	587.765	180.596	730.865	497.558	-244.613	658.807	868.773	-209.745	738.431	643.576	-147.832	746.116	662.563	-155.257	756.799	584.773	-136.913	731.555	497.603
589	5.88	2.65828	1094.4	769.678	71.9279	1091.77	817.273	-68.6039	1102.28	808.317	147.703	958.401	875.806	-133.515	962.477	865.597	11.4016	910.687	808.695	255.588	640.333	878.785	232.094	738.275	657.013	163.449	742.346	660.293	194.986	759.14	587.781	180.582	730.791	497.583	-244.657	658.701	868.715	-210.263	738.589	642.257	-147.821	746.127	662.763	-155.728	757.882	582.724	-136.7	732.281	496.194
590	5.89	2.67045	1094.21	769.946	71.9379	1091.65	817.327	-68.5629	1102.14	808.402	147.705	958.346	875.841	-133.503	962.419	865.637	11.4331	910.444	809.054	255.548	640.369	878.818	232.084	738.168	657.05	163.436	742.236	660.325	194.973	759.125	587.779	180.54	730.728	497.577	-244.667	658.582	868.561	-210.405	738.592	641.896	-147.936	746.293	663.226	-155.826	758.108	582.197	-136.653	732.373	495.876
591	5.9	2.68437	1094.12	770.12	71.9794	1091.57	817.375	-68.5441	1102.07	808.422	147.707	958.315	875.852	-133.5	962.394	865.622	11.4389	910.352	809.2	255.538	640.401	878.831	232.05	738.115	657.025	163.409	742.168	660.332	194.979	759.106	587.778	180.508	730.702	497.546	-244.695	658.604	868.564	-210.466	738.579	641.806	-147.994	746.314	663.317	-155.867	758.139	582.051	-136.657	732.362	495.823
592	5.91	2.70644	1094.11	770.102	71.9949	1091.55	817.336	-68.5172	1102.09	808.417	147.715	958.31	875.856	-133.497	962.439	865.644	11.426	910.44	809.122	255.557	640.417	878.826	232.03	738.145	656.988	163.396	742.176	660.302	194.95	759.093	587.744	180.492	730.72	497.517	-244.708	658.657	868.643	-210.453	738.582	641.812	-148.029	746.362	663.369	-155.877	758.175	582.021	-136.658	732.406	495.76
593	5.92	2.72993	1094.22	769.858	72.0077	1091.61	817.233	-68.4845	1102.17	808.376	147.712	958.353	875.86	-133.473	962.523	865.615	11.4015	910.666	808.872	255.591	640.4	878.828	232.026	738.232	656.967	163.391	742.279	660.239	194.92	759.093	587.719	180.494	730.771	497.493	-244.675	658.762	868.706	-210.192	738.506	642.402	-147.999	746.356	663.176	-155.688	757.723	582.962	-136.741	732.151	496.318
594	5.93	2.7813	1094.4	769.533	71.9165	1091.59	817.83	-68.4468	1102.3	808.228	147.727	958.414	875.848	-133.461	962.65	865.619	11.3812	910.931	808.578	255.633	640.363	878.831	232.021	738.349	656.939	163.364	742.414	660.165	194.903	759.116	587.746	180.516	730.844	497.503	-244.627	658.857	868.743	-209.67	738.357	643.746	-147.934	746.195	662.766	-155.195	756.647	585.019	-136.941	731.432	497.755
595	5.94	2.84362	1094.55	769.319	71.7922	1091.53	818.693	-68.4043	1102.41	808.144	147.747	958.485	875.899	-133.454	962.763	865.668	11.3794	911.165	808.33	255.67	640.328	878.788	232.028	738.435	656.957	163.313	742.552	660.108	194.9	759.145	587.768	180.53	730.914	497.548	-244.616	658.966	868.788	-209.568	738.396	644.06	-147.965	746.204	662.69	-155.064	756.43	585.528	-137.027	731.336	498.11
596	5.95	2.8897	1094.56	769.286	72.0914	1091.68	817.546	-68.3731	1102.43	808.141	147.744	958.519	875.942	-133.445	962.801	865.678	11.3748	911.245	808.255	255.686	640.301	878.77	232.044	738.462	656.955	163.314	742.601	660.089	194.903	759.16	587.739	180.53	730.928	497.563	-244.643	659.034	868.851	-209.557	738.403	644.134	-147.983	746.211	662.651	-155.04	756.35	585.685	-137.041	731.326	498.193
597	5.96	2.90634	1094.44	769.372	72.1554	1091.65	817.24	-68.3581	1102.35	808.171	147.738	958.462	875.901	-133.437	962.767	865.639	11.3811	911.15	808.375	255.664	640.304	878.765	232.033	738.414	656.927	163.343	742.529	660.08	194.905	759.143	587.697	180.507	730.884	497.511	-244.67	658.991	868.823	-209.557	738.346	644.172	-147.954	746.165	662.617	-155.052	756.245	585.716	-137.034	731.235	498.209
598	5.97	2.92391	1094.24	769.656	72.0197	1091.4	818.032	-68.3495	1102.2	808.256	147.732	958.38	875.902	-133.439	962.685	865.644	11.3774	910.945	808.72	255.643	640.318	878.77	232.013	738.303	656.915	163.355	742.387	660.146	194.927	759.119	587.69	180.472	730.809	497.489	-244.738	658.847	868.66	-209.786	738.351	643.594	-147.952	746.185	662.788	-155.287	756.704	584.769	-136.96	731.477	497.611
599	5.98	2.9338	1094.05	769.964	71.7055	1090.97	819.876	-68.3274	1102.06	808.361	147.731	958.32	875.946	-133.444	962.606	865.678	11.3902	910.721	809.13	255.617	640.338	878.774	232.003	738.18	656.961	163.369	742.269	660.226	194.928	759.12	587.683	180.459	730.745	497.495	-244.806	658.743	868.557	-210.328	738.518	642.232	-148.034	746.314	663.242	-155.756	757.826	582.666	-136.785	732.177	496.244
600	5.99	2.96382	1093.96	770.125	71.6534	1090.8	820.325	-68.2805	1101.98	808.411	147.753	958.286	875.978	-133.431	962.552	865.673	11.4179	910.579	809.313	255.591	640.37	878.786	232.02	738.094	656.987	163.371	742.227	660.25	194.924	759.109	587.656	180.46	730.724	497.52	-244.841	658.76	868.548	-210.456	738.555	641.889	-148.049	746.323	663.378	-155.848	758.073	582.154	-136.712	732.29	495.942
601	6	3.02049	1093.97	770.087	71.7105	1090.79	820.394	-68.1894	1101.97	808.391	147.781	958.287	875.97	-133.38	962.567	865.674	11.469	910.577	809.338	255.61	640.393	878.806	232.066	738.104	657.017	163.419	742.243	660.275	194.934	759.105	587.649	180.488	730.741	497.529	-244.829	658.867	868.615	-210.451	738.597	641.777	-147.963	746.238	663.196	-155.848	758.151	582.039	-136.642	732.348	495.828
602	6.01	3.07638	1094.11	769.927	71.781	1090.95	820.21	-68.138	1102.08	808.302	147.832	958.338	875.97	-133.334	962.651	865.695	11.5285	910.759	809.195	255.647	640.389	878.803	232.115	738.184	657.008	163.481	742.319	660.249	194.979	759.12	587.724	180.544	730.796	497.551	-244.783	658.948	868.636	-210.414	738.673	641.778	-147.792	746.061	662.668	-155.846	758.217	581.992	-136.57	732.483	495.705
603	6.02	3.12252	1094.34	769.63	71.8113	1091.16	819.913	-68.133	1102.27	808.166	147.853	958.415	875.944	-133.319	962.763	865.71	11.5249	911.086	808.782	255.697	640.341	878.77	232.142	738.31	656.966	163.511	742.442	660.199	195.026	759.148	587.799	180.579	730.864	497.568	-244.735	659.021	868.642	-210.147	738.645	642.352	-147.769	746.135	662.547	-155.604	757.813	582.899	-136.64	732.272	496.292
604	6.03	3.10779	1094.48	769.331	71.8005	1091.26	819.717	-68.1211	1102.38	808.068	147.835	958.455	875.888	-133.339	962.845	865.712	11.5007	911.308	808.509	255.739	640.316	878.768	232.133	738.401	656.963	163.473	742.513	660.143	195.059	759.152	587.866	180.588	730.902	497.577	-244.734	659.086	868.734	-209.638	738.471	643.709	-147.818	746.233	662.502	-155.106	756.714	585.025	-136.868	731.515	497.748
605	6.04	3.04715	1094.49	769.207	71.7635	1091.25	819.717	-68.1704	1102.39	808.042	147.802	958.48	875.877	-133.373	962.862	865.707	11.445	911.375	808.43	255.762	640.299	878.765	232.1	738.427	656.976	163.394	742.571	660.078	195.068	759.154	587.874	180.568	730.901	497.581	-244.76	659.044	868.709	-209.56	738.445	644.056	-147.871	746.287	662.522	-155.001	756.402	585.559	-136.942	731.359	498.084
606	6.05	2.95092	1094.44	769.244	71.6966	1091.2	819.804	-68.264	1102.31	808.131	147.758	958.462	875.835	-133.44	962.84	865.704	11.3395	911.312	808.501	255.777	640.28	878.716	232.043	738.416	656.971	163.33	742.586	660.066	195.072	759.168	587.887	180.516	730.888	497.57	-244.837	658.975	868.7	-209.579	738.396	644.156	-147.957	746.428	662.728	-155.006	756.288	585.755	-137.023	731.301	498.205
607	6.06	2.89693	1094.29	769.431	71.6324	1091.06	819.936	-68.3246	1102.21	808.199	147.715	958.392	875.739	-133.499	962.784	865.663	11.2993	911.201	808.658	255.762	640.281	878.69	232.015	738.345	656.94	163.314	742.499	660.076	195.053	759.169	587.841	180.462	730.832	497.536	-244.9	658.855	868.623	-209.601	738.315	644.207	-148.076	746.621	663.127	-155.042	756.207	585.767	-137.059	731.213	498.26
608	6.07	2.85766	1094.1	769.642	71.5961	1090.89	820.062	-68.372	1102.08	808.259	147.687	958.262	875.624	-133.514	962.666	865.611	11.2851	911.022	808.915	255.73	640.266	878.679	231.986	738.238	656.896	163.358	742.321	660.147	194.998	759.127	587.717	180.434	730.759	497.487	-244.923	658.782	868.573	-209.822	738.314	643.556	-148.102	746.549	663.259	-155.265	756.655	584.803	-136.963	731.448	497.643
609	6.08	2.82122	1094.01	769.768	71.5552	1090.78	820.126	-68.3634	1101.95	808.327	147.687	958.187	875.611	-133.516	962.58	865.618	11.3057	910.877	809.132	255.698	640.281	878.714	232.007	738.152	656.913	163.394	742.232	660.202	194.95	759.083	587.672	180.425	730.734	497.496	-244.95	658.817	868.627	-210.325	738.494	642.185	-148.102	746.451	663.356	-155.727	757.793	582.688	-136.755	732.179	496.22
610	6.09	2.81464	1093.99	769.729	71.5502	1090.75	820.091	-68.3421	1101.87	808.317	147.69	958.174	875.594	-133.506	962.535	865.598	11.3286	910.845	809.168	255.686	640.283	878.698	232.053	738.129	656.968	163.414	742.246	660.209	194.874	759.105	587.634	180.453	730.743	497.516	-244.918	658.886	868.678	-210.438	738.576	641.855	-148.042	746.262	663.237	-155.829	758.068	582.163	-136.681	732.359	495.876
611	6.1	2.81412	1094.04	769.635	71.5617	1090.79	819.926	-68.3167	1101.89	808.21	147.697	958.201	875.568	-133.492	962.546	865.527	11.3607	910.916	809.096	255.687	640.292	878.682	232.079	738.147	656.96	163.409	742.287	660.172	194.853	759.113	587.601	180.485	730.775	497.507	-244.859	658.932	868.638	-210.453	738.653	641.759	-147.93	745.977	662.804	-155.857	758.173	582.015	-136.63	732.441	495.743
612	6.11	2.77753	1094.1	769.455	71.5292	1090.86	819.742	-68.311	1101.95	808.127	147.679	958.214	875.515	-133.506	962.582	865.457	11.3572	911.033	808.935	255.693	640.294	878.698	232.097	738.194	656.966	163.398	742.329	660.165	194.851	759.119	587.609	180.504	730.815	497.494	-244.837	658.995	868.664	-210.465	738.701	641.726	-147.908	745.953	662.662	-155.845	758.255	581.908	-136.598	732.527	495.646
613	6.12	2.72303	1094.19	769.233	71.4616	1090.96	819.515	-68.379	1102.05	808.031	147.651	958.24	875.437	-133.537	962.625	865.419	11.3109	911.157	808.754	255.703	640.267	878.687	232.084	738.266	656.937	163.4	742.395	660.147	194.863	759.151	587.616	180.497	730.848	497.495	-244.85	658.991	868.698	-210.243	738.609	642.354	-147.907	746.051	662.631	-155.656	757.796	582.846	-136.702	732.207	496.275
614	6.13	2.6457	1094.23	769.039	71.3934	1091.03	819.355	-68.4579	1102.09	807.954	147.611	958.239	875.359	-133.573	962.657	865.373	11.2321	911.25	808.571	255.71	640.237	878.668	232.039	738.307	656.877	163.387	742.43	660.11	194.895	759.166	587.605	180.486	730.847	497.488	-244.894	658.93	868.692	-209.728	738.343	643.723	-147.951	746.239	662.758	-155.21	756.65	584.977	-136.939	731.403	497.753
615	6.14	2.57209	1094.19	768.926	71.3075	1090.99	819.265	-68.5378	1102.08	807.887	147.556	958.236	875.31	-133.635	962.658	865.316	11.1617	911.262	808.498	255.692	640.192	878.649	231.988	738.315	656.853	163.337	742.464	660.054	194.938	759.173	587.604	180.462	730.816	497.457	-244.961	658.827	868.625	-209.636	738.284	644.036	-148.079	746.545	663.124	-155.109	756.314	585.508	-137.017	731.232	498.098
616	6.15	2.51003	1094.14	768.91	71.2387	1090.92	819.201	-68.6167	1102.03	807.891	147.52	958.254	875.282	-133.706	962.667	865.295	11.1208	911.242	808.568	255.67	640.223	878.695	231.957	738.319	656.869	163.287	742.464	660.04	194.979	759.184	587.646	180.434	730.793	497.445	-245.068	658.772	868.62	-209.636	738.267	644.121	-148.147	746.618	663.256	-155.105	756.204	585.702	-137.049	731.178	498.182
617	6.16	2.47714	1094.1	768.858	71.2247	1090.88	819.22	-68.6287	1102.01	807.845	147.497	958.268	875.255	-133.756	962.659	865.256	11.1305	911.242	808.618	255.63	640.261	878.715	231.962	738.296	656.883	163.307	742.425	660.101	195.027	759.172	587.714	180.421	730.791	497.445	-245.115	658.749	868.585	-209.617	738.239	644.149	-148.163	746.618	663.313	-155.076	756.172	585.752	-137.035	731.139	498.212
618	6.17	2.51552	1094.06	768.77	71.2596	1090.88	819.093	-68.5992	1101.97	807.679	147.501	958.265	875.186	-133.746	962.626	865.175	11.156	911.258	808.578	255.602	640.279	878.715	232	738.265	656.873	163.377	742.39	660.134	195.058	759.144	587.741	180.443	730.798	497.428	-245.083	658.768	868.545	-209.555	738.209	644.144	-148.053	746.461	663.139	-155.043	756.174	585.725	-136.975	731.073	498.223
619	6.18	2.56011	1094.06	768.719	71.268	1090.9	818.915	-68.585	1101.93	807.556	147.509	958.271	875.17	-133.72	962.601	865.11	11.1891	911.299	808.502	255.587	640.309	878.722	232.064	738.247	656.883	163.457	742.378	660.176	195.063	759.141	587.739	180.489	730.813	497.459	-245.074	658.858	868.559	-209.749	738.319	643.554	-147.882	746.156	662.697	-155.208	756.708	584.763	-136.82	731.41	497.592
620	6.19	2.58471	1094.05	768.772	71.2794	1090.92	818.828	-68.5737	1101.91	807.511	147.509	958.288	875.138	-133.716	962.61	865.071	11.2236	911.357	808.489	255.597	640.344	878.74	232.123	738.253	656.927	163.499	742.387	660.237	195.079	759.169	587.773	180.525	730.84	497.491	-245.102	658.946	868.588	-210.258	738.599	642.228	-147.815	746.09	662.595	-155.641	757.902	582.631	-136.58	732.269	496.13
621	6.2	2.55003	1094.05	768.68	71.2595	1090.91	818.823	-68.5902	1101.91	807.463	147.499	958.3	875.118	-133.73	962.606	865.033	11.2083	911.357	808.511	255.621	640.372	878.722	232.154	738.274	656.973	163.511	742.393	660.26	195.071	759.163	587.798	180.532	730.832	497.51	-245.142	658.97	868.565	-210.386	738.674	641.879	-147.8	746.076	662.581	-155.747	758.21	582.127	-136.538	732.505	495.774
622	6.21	2.46441	1094.01	768.607	71.163	1090.87	818.787	-68.6677	1101.89	807.344	147.451	958.294	875.055	-133.779	962.597	864.988	11.1423	911.324	808.534	255.659	640.376	878.668	232.135	738.279	656.964	163.499	742.381	660.265	195.069	759.156	587.802	180.518	730.806	497.526	-245.219	658.966	868.557	-210.428	738.674	641.735	-147.827	746.092	662.578	-155.798	758.3	581.983	-136.56	732.553	495.675
623	6.22	2.33662	1093.94	768.594	71.0118	1090.83	818.695	-68.8049	1101.87	807.245	147.376	958.273	874.981	-133.878	962.607	864.946	11.044	911.287	808.58	255.697	640.383	878.633	232.058	738.274	656.924	163.442	742.387	660.186	195.03	759.164	587.73	180.478	730.778	497.491	-245.304	658.886	868.508	-210.268	738.552	642.314	-147.959	746.243	662.745	-155.645	757.791	582.887	-136.704	732.19	496.288
624	6.23	2.19175	1093.85	768.55	70.8885	1090.78	818.637	-68.9188	1101.83	807.172	147.307	958.263	874.923	-133.964	962.596	864.92	10.9484	911.245	808.572	255.721	640.387	878.609	231.976	738.259	656.877	163.35	742.388	660.115	194.949	759.167	587.629	180.419	730.743	497.45	-245.38	658.802	868.488	-209.809	738.291	643.71	-148.173	746.501	663.178	-155.23	756.584	585	-136.938	731.327	497.746
625	6.24	2.08687	1093.78	768.497	70.8006	1090.74	818.587	-69.0042	1101.78	807.097	147.247	958.269	874.828	-134.024	962.598	864.922	10.8931	911.225	808.484	255.747	640.406	878.613	231.912	738.253	656.817	163.283	742.394	660.075	194.898	759.153	587.596	180.381	730.739	497.418	-245.38	658.745	868.406	-209.726	738.223	644.041	-148.245	746.577	663.252	-155.164	756.265	585.503	-137.041	731.115	498.121
626	6.25	2.02673	1093.78	768.416	70.7462	1090.75	818.464	-69.0715	1101.75	807.02	147.226	958.299	874.751	-134.054	962.607	864.876	10.8595	911.264	808.338	255.757	640.425	878.62	231.913	738.269	656.802	163.274	742.419	660.06	194.861	759.148	587.575	180.36	730.758	497.392	-245.369	658.785	868.42	-209.692	738.22	644.101	-148.228	746.483	663.105	-155.14	756.21	585.642	-137.039	731.083	498.191
627	6.26	2.00153	1093.8	768.294	70.7447	1090.8	818.34	-69.0971	1101.72	806.922	147.234	958.316	874.687	-134.044	962.622	864.824	10.8669	911.316	808.237	255.753	640.445	878.604	231.942	738.309	656.765	163.325	742.422	660.068	194.848	759.147	587.53	180.368	730.792	497.352	-245.353	658.911	868.532	-209.863	738.33	643.503	-148.128	746.18	662.766	-155.309	756.747	584.73	-136.931	731.469	497.537
628	6.27	2.00693	1093.8	768.188	70.7726	1090.84	818.215	-69.0733	1101.68	806.856	147.262	958.31	874.627	-134.006	962.604	864.794	10.9217	911.34	808.108	255.749	640.482	878.616	232.003	738.315	656.751	163.396	742.39	660.1	194.886	759.134	587.524	180.408	730.822	497.346	-245.298	658.965	868.539	-210.342	738.586	642.097	-148.051	746.046	662.651	-155.727	757.918	582.589	-136.679	732.281	496.073
629	6.28	2.01887	1093.77	768.171	70.8025	1090.82	818.156	-69.0713	1101.63	806.829	147.272	958.3	874.597	-133.976	962.575	864.803	10.9562	911.294	808.145	255.755	640.511	878.65	232.055	738.299	656.79	163.453	742.392	660.136	194.93	759.155	587.527	180.443	730.834	497.367	-245.293	658.967	868.547	-210.459	738.644	641.753	-147.966	745.997	662.584	-155.806	758.194	582.056	-136.567	732.465	495.708
630	6.29	1.96635	1093.72	768.254	70.7693	1090.77	818.223	-69.1304	1101.6	806.857	147.262	958.293	874.586	-134	962.568	864.847	10.9221	911.277	808.239	255.789	640.528	878.672	232.06	738.285	656.822	163.458	742.408	660.145	194.961	759.193	587.585	180.448	730.821	497.4	-245.314	658.903	868.532	-210.491	738.645	641.697	-147.929	746.053	662.608	-155.837	758.256	581.943	-136.561	732.521	495.653
631	6.3	1.87932	1093.65	768.393	70.7052	1090.7	818.296	-69.2079	1101.58	806.872	147.237	958.298	874.565	-134.051	962.568	864.878	10.8568	911.243	808.29	255.815	640.507	878.628	232.036	738.268	656.844	163.43	742.403	660.133	194.995	759.23	587.613	180.43	730.776	497.421	-245.379	658.791	868.495	-210.282	738.522	642.339	-147.99	746.226	662.826	-155.669	757.761	582.883	-136.676	732.162	496.319
632	6.31	1.80924	1093.58	768.463	70.6399	1090.66	818.266	-69.2985	1101.57	806.817	147.201	958.303	874.513	-134.106	962.581	864.85	10.7911	911.246	808.294	255.839	640.489	878.595	231.992	738.267	656.826	163.395	742.4	660.109	195.023	759.242	587.641	180.405	730.749	497.425	-245.421	658.681	868.42	-209.79	738.276	643.715	-148.144	746.491	663.25	-155.227	756.594	585.014	-136.91	731.345	497.766
633	6.32	1.74916	1093.55	768.453	70.585	1090.68	818.241	-69.3588	1101.61	806.732	147.162	958.335	874.477	-134.139	962.595	864.816	10.7406	911.29	808.226	255.861	640.476	878.586	231.974	738.294	656.826	163.346	742.441	660.057	195.043	759.241	587.67	180.389	730.753	497.43	-245.445	658.648	868.379	-209.685	738.247	644.025	-148.185	746.59	663.299	-155.112	756.29	585.543	-136.991	731.186	498.116
634	6.33	1.7436	1093.6	768.348	70.5724	1090.75	818.127	-69.3702	1101.64	806.677	147.164	958.381	874.457	-134.138	962.631	864.806	10.7365	911.384	808.016	255.882	640.472	878.595	232.007	738.348	656.825	163.349	742.497	660.023	195.064	759.23	587.722	180.413	730.779	497.435	-245.401	658.684	868.378	-209.65	738.253	644.081	-148.173	746.676	663.268	-155.051	756.224	585.655	-136.983	731.155	498.19
635	6.34	1.76379	1093.65	768.236	70.6135	1090.78	818.054	-69.3516	1101.64	806.622	147.187	958.412	874.433	-134.128	962.665	864.794	10.793	911.462	807.917	255.875	640.493	878.6	232.038	738.383	656.807	163.389	742.521	660.04	195.061	759.198	587.716	180.451	730.819	497.443	-245.338	658.796	868.434	-209.596	738.26	644.105	-148.095	746.564	663.077	-154.993	756.235	585.686	-136.939	731.139	498.22
636	6.35	1.78557	1093.67	768.25	70.6451	1090.82	818.034	-69.3271	1101.65	806.614	147.214	958.42	874.45	-134.114	962.686	864.774	10.8464	911.506	807.89	255.835	640.526	878.593	232.067	738.377	656.822	163.427	742.502	660.107	195.034	759.179	587.711	180.485	730.846	497.435	-245.323	658.94	868.501	-209.782	738.383	643.506	-147.994	746.242	662.755	-155.172	756.795	584.706	-136.802	731.502	497.553
637	6.36	1.80664	1093.68	768.265	70.6291	1090.82	818.102	-69.3211	1101.62	806.646	147.229	958.413	874.463	-134.111	962.688	864.791	10.882	911.485	807.935	255.796	640.575	878.602	232.085	738.365	656.824	163.465	742.463	660.171	194.992	759.176	587.673	180.478	730.857	497.4	-245.327	659.029	868.524	-210.288	738.639	642.126	-147.959	746.105	662.657	-155.655	757.957	582.603	-136.591	732.336	496.097
638	6.37	1.79021	1093.65	768.296	70.6013	1090.75	818.196	-69.2974	1101.55	806.701	147.208	958.398	874.459	-134.128	962.677	864.788	10.8593	911.425	808.015	255.774	640.631	878.6	232.077	738.334	656.798	163.475	742.433	660.152	194.979	759.199	587.635	180.451	730.85	497.385	-245.381	659.055	868.531	-210.434	738.681	641.771	-147.939	746.039	662.596	-155.798	758.203	582.089	-136.544	732.497	495.753
639	6.38	1.74346	1093.57	768.323	70.553	1090.65	818.284	-69.3383	1101.51	806.723	147.16	958.359	874.458	-134.177	962.648	864.759	10.7879	911.328	808.121	255.772	640.636	878.598	232.016	738.285	656.764	163.436	742.39	660.084	194.966	759.199	587.597	180.397	730.8	497.324	-245.46	658.929	868.449	-210.51	738.638	641.663	-147.997	746.138	662.75	-155.841	758.246	581.914	-136.573	732.495	495.684
640	6.39	1.70647	1093.47	768.464	70.4928	1090.58	818.4	-69.4092	1101.5	806.739	147.106	958.327	874.445	-134.229	962.623	864.759	10.7221	911.248	808.234	255.801	640.645	878.619	231.956	738.235	656.732	163.383	742.337	660.052	194.926	759.195	587.565	180.338	730.749	497.331	-245.558	658.813	868.371	-210.336	738.475	642.256	-148.171	746.407	663.186	-155.69	757.714	582.829	-136.713	732.101	496.302
641	6.4	1.66964	1093.45	768.583	70.4282	1090.54	818.51	-69.4668	1101.5	806.835	147.059	958.34	874.467	-134.274	962.627	864.778	10.6554	911.262	808.287	255.857	640.634	878.63	231.915	738.236	656.723	163.312	742.346	660.038	194.879	759.217	587.527	180.303	730.714	497.352	-245.626	658.736	868.299	-209.867	738.215	643.695	-148.266	746.489	663.32	-155.298	756.536	584.989	-136.943	731.272	497.783
642	6.41	1.6553	1093.5	768.624	70.4115	1090.59	818.493	-69.4801	1101.55	806.862	147.037	958.389	874.466	-134.27	962.658	864.789	10.6146	911.37	808.155	255.919	640.624	878.603	231.905	738.269	656.733	163.269	742.441	660.019	194.845	759.227	587.5	180.304	730.72	497.364	-245.631	658.736	868.286	-209.766	738.203	644.028	-148.307	746.554	663.348	-155.204	756.275	585.513	-137.038	731.123	498.133
643	6.42	1.72748	1093.61	768.487	70.4582	1090.71	818.359	-69.4462	1101.66	806.772	147.059	958.443	874.462	-134.234	962.699	864.752	10.6646	911.511	808.002	255.967	640.627	878.562	231.941	738.334	656.723	163.286	742.525	659.983	194.853	759.228	587.51	180.338	730.771	497.364	-245.575	658.829	868.316	-209.705	738.239	644.053	-148.249	746.502	663.098	-155.144	756.255	585.609	-137.028	731.124	498.175
644	6.43	1.85266	1093.76	768.288	70.5875	1090.84	818.221	-69.3398	1101.74	806.704	147.124	958.492	874.498	-134.16	962.747	864.72	10.7619	911.643	807.826	255.986	640.634	878.54	232.007	738.403	656.726	163.37	742.575	659.975	194.919	759.238	587.559	180.389	730.838	497.355	-245.532	659.009	868.444	-209.636	738.296	644.033	-148.119	746.251	662.689	-155.062	756.3	585.602	-136.949	731.136	498.181
645	6.44	1.97586	1093.88	768.16	70.7156	1090.93	818.133	-69.2251	1101.78	806.693	147.191	958.522	874.529	-134.108	962.779	864.734	10.8492	911.75	807.767	255.983	640.661	878.6	232.077	738.447	656.746	163.467	742.599	659.977	195.004	759.247	587.603	180.437	730.889	497.36	-245.491	659.15	868.573	-209.558	738.317	644.08	-148.007	746.179	662.607	-154.979	756.348	585.6	-136.846	731.161	498.154
646	6.45	2.03287	1093.92	768.132	70.7909	1090.94	818.136	-69.1316	1101.77	806.767	147.237	958.52	874.55	-134.08	962.787	864.776	10.9278	911.775	807.868	255.972	640.693	878.632	232.127	738.44	656.751	163.541	742.589	660.031	195.062	759.237	587.624	180.465	730.894	497.391	-245.472	659.171	868.596	-209.497	738.286	644.108	-147.918	746.14	662.566	-154.936	756.361	585.62	-136.788	731.133	498.141
647	6.46	2.02659	1093.88	768.282	70.8007	1090.88	818.269	-69.1129	1101.75	806.88	147.243	958.5	874.565	-134.079	962.771	864.778	10.9312	911.72	808.052	255.958	640.701	878.597	232.117	738.419	656.753	163.541	742.553	660.058	195.098	759.246	587.644	180.439	730.867	497.374	-245.492	659.091	868.493	-209.498	738.248	644.108	-147.934	746.242	662.717	-154.947	756.335	585.644	-136.795	731.089	498.15
648	6.47	1.97438	1093.81	768.486	70.7322	1090.8	818.433	-69.1218	1101.72	806.991	147.209	958.475	874.561	-134.105	962.766	864.8	10.874	911.614	808.241	255.95	640.727	878.573	232.056	738.392	656.739	163.492	742.508	660.069	195.099	759.263	587.675	180.368	730.82	497.334	-245.562	658.968	868.399	-209.543	738.218	644.132	-148.076	746.529	663.167	-154.988	756.272	585.698	-136.856	731.06	498.181
649	6.48	1.92994	1093.74	768.673	70.6801	1090.73	818.595	-69.1673	1101.71	807.153	147.181	958.447	874.553	-134.132	962.763	864.854	10.8056	911.544	808.337	255.966	640.755	878.608	231.981	738.363	656.729	163.427	742.472	660.082	195.077	759.262	587.669	180.322	730.781	497.354	-245.624	658.883	868.393	-209.602	738.199	644.163	-148.168	746.6	663.318	-155.024	756.203	585.752	-136.937	731.04	498.244
650	6.49	1.89902	1093.72	768.759	70.6726	1090.72	818.625	-69.1905	1101.74	807.225	147.17	958.437	874.573	-134.134	962.763	864.859	10.8089	911.525	808.365	255.989	640.698	878.565	231.963	738.346	656.719	163.411	742.447	660.044	195.066	759.249	587.662	180.329	730.759	497.376	-245.636	658.871	868.41	-209.624	738.195	644.177	-148.18	746.613	663.304	-155.042	756.185	585.729	-136.992	731.017	498.267
651	6.5	1.88704	1093.77	768.704	70.6774	1090.75	818.599	-69.185	1101.78	807.272	147.185	958.444	874.588	-134.108	962.785	864.865	10.8203	911.62	808.294	256.03	640.642	878.528	231.983	738.35	656.719	163.403	742.469	660.023	195.022	759.251	587.656	180.344	730.755	497.369	-245.599	658.911	868.393	-209.632	738.225	644.141	-148.173	746.628	663.255	-155.061	756.228	585.678	-136.994	731.044	498.204
652	6.51	1.91638	1093.87	768.654	70.7091	1090.82	818.547	-69.1432	1101.81	807.282	147.238	958.462	874.633	-134.058	962.826	864.864	10.8378	911.756	808.227	256.075	640.62	878.517	232.029	738.358	656.767	163.423	742.488	660.049	194.977	759.243	587.638	180.369	730.776	497.376	-245.506	658.988	868.377	-209.83	738.364	643.52	-148.151	746.51	663.138	-155.259	756.79	584.732	-136.87	731.46	497.516
653	6.52	1.96573	1093.98	768.538	70.7729	1090.91	818.491	-69.0872	1101.82	807.311	147.293	958.469	874.631	-134.005	962.872	864.902	10.9042	911.825	808.187	256.099	640.613	878.509	232.074	738.367	656.77	163.455	742.512	660.049	194.939	759.229	587.603	180.407	730.821	497.361	-245.44	659.165	868.506	-210.313	738.635	642.137	-148.055	746.207	662.786	-155.691	757.977	582.614	-136.633	732.341	496.047
654	6.53	2.01549	1094.02	768.44	70.8218	1090.97	818.403	-69.0341	1101.83	807.295	147.331	958.47	874.608	-133.957	962.89	864.885	10.978	911.858	808.097	256.084	640.616	878.52	232.09	738.374	656.748	163.484	742.51	660.022	194.91	759.206	587.576	180.414	730.851	497.326	-245.391	659.273	868.536	-210.433	738.724	641.763	-148.018	746.091	662.683	-155.778	758.257	582.045	-136.531	732.546	495.661
655	6.54	2.01598	1094.01	768.511	70.827	1090.92	818.471	-69.0016	1101.82	807.353	147.324	958.448	874.592	-133.961	962.885	864.905	10.9675	911.824	808.107	256.043	640.607	878.503	232.064	738.359	656.714	163.471	742.493	660.022	194.877	759.199	587.495	180.371	730.839	497.292	-245.395	659.253	868.524	-210.472	738.715	641.661	-148.012	746.058	662.634	-155.817	758.319	581.892	-136.534	732.552	495.606
656	6.55	2.01316	1093.95	768.641	70.7885	1090.83	818.608	-69.0251	1101.8	807.443	147.286	958.398	874.587	-134.009	962.895	864.942	10.9033	911.788	808.176	256.004	640.634	878.537	231.995	738.336	656.681	163.414	742.464	660.027	194.862	759.184	587.454	180.309	730.793	497.268	-245.447	659.185	868.502	-210.289	738.563	642.259	-148.072	746.193	662.791	-155.654	757.775	582.818	-136.67	732.137	496.254
657	6.56	1.98665	1093.9	768.706	70.7595	1090.77	818.687	-69.0618	1101.81	807.52	147.254	958.393	874.584	-134.036	962.92	864.949	10.8382	911.77	808.283	255.985	640.649	878.567	231.927	738.326	656.61	163.358	742.462	659.968	194.858	759.197	587.431	180.262	730.771	497.245	-245.491	659.086	868.402	-209.796	738.29	643.622	-148.213	746.48	663.2	-155.227	756.583	584.931	-136.9	731.311	497.668
658	6.57	1.98743	1093.91	768.768	70.7571	1090.78	818.721	-69.065	1101.85	807.539	147.253	958.416	874.59	-134.03	962.966	864.953	10.8114	911.798	808.272	256.018	640.64	878.541	231.896	738.343	656.572	163.318	742.494	659.91	194.893	759.235	587.466	180.247	730.78	497.25	-245.55	659.033	868.298	-209.711	738.26	643.983	-148.253	746.59	663.265	-155.15	756.276	585.457	-136.978	731.136	498.042
659	6.58	2.02161	1093.96	768.816	70.7968	1090.83	818.712	-69.0433	1101.91	807.597	147.285	958.452	874.619	-133.995	963.02	864.977	10.8289	911.865	808.221	256.039	640.602	878.494	231.928	738.385	656.662	163.316	742.547	659.922	194.937	759.272	587.524	180.272	730.793	497.313	-245.563	659.069	868.301	-209.674	738.286	644.104	-148.247	746.676	663.268	-155.119	756.227	585.58	-136.98	731.114	498.142
660	6.59	2.11257	1094.07	768.71	70.8813	1090.91	818.661	-68.9447	1101.96	807.617	147.348	958.483	874.639	-133.935	963.079	865.018	10.8867	911.968	808.14	256.074	640.587	878.483	231.999	738.415	656.72	163.394	742.59	659.957	194.979	759.309	587.556	180.327	730.807	497.328	-245.509	659.175	868.348	-209.609	738.309	644.108	-148.143	746.592	663.079	-155.052	756.259	585.621	-136.938	731.13	498.146
661	6.6	2.22701	1094.16	768.579	70.9926	1090.99	818.555	-68.8207	1102.01	807.593	147.438	958.495	874.687	-133.853	963.119	865.021	11.0117	912.09	808.013	256.109	640.567	878.463	232.08	738.427	656.736	163.496	742.583	660.027	195.028	759.307	587.592	180.417	730.836	497.369	-245.456	659.312	868.399	-209.534	738.323	644.111	-147.964	746.328	662.652	-154.969	756.322	585.606	-136.867	731.103	498.141
662	6.61	2.32566	1094.18	768.614	71.1074	1091.02	818.569	-68.7287	1102.05	807.601	147.483	958.485	874.689	-133.79	963.131	865.03	11.1088	912.119	808.072	256.114	640.551	878.459	232.148	738.43	656.785	163.562	742.583	660.071	195.085	759.298	587.633	180.481	730.85	497.414	-245.47	659.4	868.431	-209.724	738.449	643.508	-147.86	746.235	662.503	-155.119	756.845	584.665	-136.732	731.459	497.516
663	6.62	2.35721	1094.16	768.686	71.1397	1090.96	818.685	-68.6899	1102.01	807.638	147.481	958.472	874.683	-133.768	963.125	865.02	11.1266	912.094	808.15	256.09	640.557	878.458	232.167	738.408	656.795	163.578	742.57	660.087	195.11	759.302	587.684	180.49	730.853	497.438	-245.469	659.416	868.422	-210.259	738.7	642.17	-147.832	746.186	662.504	-155.593	757.969	582.535	-136.513	732.292	496.075
664	6.63	2.33876	1094.07	768.818	71.1239	1090.86	818.839	-68.706	1101.95	807.685	147.46	958.434	874.664	-133.788	963.088	864.989	11.1142	912.009	808.263	256.051	640.581	878.48	232.131	738.357	656.764	163.555	742.506	660.085	195.094	759.277	587.65	180.44	730.827	497.381	-245.499	659.37	868.36	-210.413	738.719	641.808	-147.884	746.263	662.688	-155.732	758.219	582.005	-136.492	732.445	495.729
665	6.64	2.27025	1093.95	768.958	71.0892	1090.74	818.991	-68.7381	1101.89	807.808	147.416	958.388	874.623	-133.851	963.057	864.985	11.0454	911.899	808.442	256.014	640.583	878.488	232.07	738.308	656.718	163.511	742.437	660.066	195.038	759.255	587.578	180.361	730.771	497.312	-245.569	659.291	868.312	-210.491	738.67	641.692	-148.036	746.485	663.133	-155.811	758.226	581.906	-136.549	732.427	495.657
666	6.65	2.1944	1093.92	769.034	70.9945	1090.69	819.002	-68.8035	1101.89	807.888	147.388	958.358	874.602	-133.914	963.07	865.029	10.9606	911.863	808.535	255.978	640.564	878.455	231.984	738.307	656.667	163.433	742.4	660.071	194.974	759.236	587.53	180.298	730.734	497.271	-245.617	659.198	868.31	-210.313	738.523	642.29	-148.146	746.543	663.269	-155.677	757.679	582.866	-136.696	732.047	496.3
667	6.66	2.1462	1093.97	768.929	70.9435	1090.77	818.889	-68.8467	1101.94	807.851	147.362	958.374	874.612	-133.942	963.128	865.067	10.9029	911.971	808.369	255.995	640.563	878.487	231.932	738.343	656.639	163.358	742.456	660.041	194.941	759.232	587.545	180.273	730.753	497.264	-245.624	659.234	868.362	-209.806	738.307	643.663	-148.218	746.619	663.275	-155.229	756.554	584.954	-136.904	731.281	497.741
668	6.67	2.16012	1094.08	768.771	70.9656	1090.88	818.736	-68.819	1102.01	807.783	147.359	958.415	874.579	-133.929	963.187	865.048	10.9047	912.154	808.095	256.021	640.572	878.507	231.938	738.4	656.637	163.331	742.539	659.951	194.898	759.245	587.544	180.291	730.807	497.264	-245.554	659.336	868.387	-209.661	738.315	643.944	-148.207	746.586	663.08	-155.091	756.311	585.453	-136.939	731.165	498.058
669	6.68	2.2245	1094.2	768.64	71.0118	1090.99	818.669	-68.79	1102.1	807.73	147.397	958.452	874.587	-133.902	963.241	865.044	10.9299	912.254	807.969	256.046	640.56	878.5	231.969	738.448	656.637	163.358	742.599	659.93	194.883	759.255	587.495	180.328	730.851	497.285	-245.496	659.432	868.387	-209.613	738.354	644.009	-148.116	746.335	662.671	-155.027	756.291	585.553	-136.934	731.165	498.131
670	6.69	2.28431	1094.26	768.578	71.0579	1091.05	818.631	-68.7495	1102.15	807.689	147.425	958.449	874.613	-133.874	963.282	865.042	10.9603	912.285	807.947	256.057	640.536	878.484	232.007	738.468	656.658	163.397	742.604	659.956	194.89	759.276	587.483	180.367	730.865	497.3	-245.458	659.495	868.388	-209.583	738.367	644.057	-148.063	746.255	662.589	-155.001	756.317	585.577	-136.917	731.149	498.147
671	6.7	2.29269	1094.25	768.614	71.0617	1091.04	818.591	-68.7494	1102.13	807.688	147.43	958.421	874.611	-133.857	963.255	865.018	10.9705	912.245	807.975	256.043	640.518	878.484	232.02	738.431	656.682	163.416	742.578	659.942	194.886	759.266	587.474	180.358	730.824	497.282	-245.468	659.497	868.383	-209.556	738.333	644.069	-148.044	746.213	662.552	-154.988	756.316	585.588	-136.887	731.111	498.11
672	6.71	2.26235	1094.15	768.719	71.029	1090.91	818.692	-68.7692	1102.05	807.77	147.42	958.37	874.61	-133.855	963.195	864.988	10.9558	912.141	808.145	255.994	640.493	878.441	232.006	738.363	656.68	163.409	742.528	659.941	194.886	759.26	587.456	180.339	730.775	497.286	-245.511	659.421	868.343	-209.805	738.377	643.436	-148.063	746.284	662.732	-155.226	756.79	584.641	-136.836	731.398	497.506
673	6.72	2.20783	1094.03	768.935	70.991	1090.76	818.915	-68.7923	1101.95	807.906	147.409	958.322	874.57	-133.869	963.129	864.979	10.9391	912.016	808.376	255.965	640.497	878.421	231.993	738.28	656.68	163.388	742.447	659.981	194.894	759.248	587.437	180.326	730.716	497.325	-245.593	659.34	868.306	-210.356	738.58	642.051	-148.146	746.49	663.152	-155.703	757.888	582.552	-136.665	732.172	496.105
674	6.73	2.19568	1093.97	769.017	70.9727	1090.69	819.045	-68.7969	1101.91	807.957	147.416	958.314	874.553	-133.873	963.109	864.99	10.933	911.967	808.451	255.947	640.505	878.424	231.995	738.242	656.687	163.387	742.403	659.98	194.919	759.257	587.432	180.316	730.704	497.314	-245.659	659.282	868.283	-210.503	738.632	641.712	-148.178	746.502	663.261	-155.818	758.145	582.043	-136.613	732.321	495.764
675	6.74	2.213	1094.01	768.951	70.9996	1090.76	818.929	-68.7802	1101.94	807.94	147.432	958.34	874.549	-133.859	963.157	864.963	10.9624	912.026	808.265	255.942	640.518	878.429	232.012	738.291	656.68	163.426	742.42	659.99	194.965	759.278	587.49	180.326	730.737	497.294	-245.649	659.328	868.267	-210.513	738.669	641.633	-148.146	746.565	663.271	-155.837	758.222	581.92	-136.571	732.408	495.659
676	6.75	2.25982	1094.13	768.849	71.0702	1090.92	818.757	-68.7497	1102.04	807.878	147.465	958.398	874.546	-133.832	963.246	864.957	11.0312	912.13	808.063	255.966	640.533	878.43	232.051	738.391	656.678	163.47	742.499	659.971	195.016	759.29	587.554	180.34	730.799	497.253	-245.612	659.423	868.309	-210.24	738.597	642.223	-148.062	746.546	663.076	-155.621	757.76	582.832	-136.621	732.144	496.245
677	6.76	2.30084	1094.29	768.686	71.1145	1091.07	818.652	-68.715	1102.15	807.797	147.496	958.457	874.532	-133.806	963.324	864.983	11.0801	912.241	807.893	255.981	640.534	878.401	232.091	738.479	656.694	163.504	742.61	659.947	195.057	759.326	587.589	180.383	730.867	497.268	-245.576	659.523	868.367	-209.689	738.423	643.609	-147.926	746.344	662.63	-155.1	756.685	584.904	-136.777	731.4	497.642
678	6.77	2.30572	1094.38	768.548	71.1417	1091.19	818.508	-68.714	1102.23	807.74	147.5	958.498	874.477	-133.793	963.387	865.009	11.0835	912.355	807.667	256.005	640.523	878.398	232.107	738.543	656.688	163.516	742.69	659.926	195.09	759.335	587.627	180.41	730.913	497.288	-245.534	659.594	868.399	-209.553	738.436	643.942	-147.928	746.324	662.529	-154.938	756.45	585.394	-136.815	731.258	497.994
679	6.78	2.2533	1094.37	768.536	71.1076	1091.17	818.512	-68.7626	1102.22	807.716	147.487	958.499	874.438	-133.809	963.406	865.031	11.0583	912.361	807.601	256.038	640.541	878.419	232.067	738.55	656.653	163.479	742.692	659.905	195.073	759.309	587.639	180.398	730.887	497.286	-245.527	659.572	868.346	-209.535	738.423	644.035	-147.956	746.312	662.52	-154.916	756.369	585.548	-136.842	731.218	498.09
680	6.79	2.14728	1094.26	768.728	71.0217	1091.06	818.689	-68.8299	1102.17	807.817	147.464	958.448	874.432	-133.845	963.357	865.001	11.006	912.253	807.777	256.063	640.552	878.428	232.016	738.502	656.662	163.425	742.651	659.933	195.019	759.302	587.624	180.354	730.83	497.278	-245.576	659.486	868.288	-209.571	738.36	644.072	-148.034	746.403	662.717	-154.953	756.299	585.607	-136.885	731.143	498.138
681	6.8	2.06524	1094.09	768.942	70.926	1090.9	818.864	-68.9196	1102.07	807.92	147.429	958.374	874.415	-133.884	963.283	864.98	10.9255	912.058	808.001	256.088	640.538	878.397	231.967	738.4	656.635	163.394	742.551	659.958	194.975	759.3	587.554	180.298	730.754	497.241	-245.647	659.393	868.285	-209.599	738.281	644.095	-148.171	746.588	663.15	-155.018	756.22	585.643	-136.908	731.038	498.167
682	6.81	2.00301	1093.96	769.02	70.8735	1090.77	818.936	-68.9634	1101.96	807.955	147.399	958.301	874.359	-133.915	963.217	864.973	10.8855	911.888	808.132	256.1	640.509	878.375	231.946	738.311	656.625	163.373	742.427	659.954	194.918	759.278	587.464	180.256	730.689	497.213	-245.68	659.312	868.259	-209.846	738.31	643.451	-148.196	746.55	663.219	-155.271	756.659	584.697	-136.842	731.294	497.56
683	6.82	1.98086	1093.94	769.056	70.8432	1090.73	818.944	-68.9821	1101.91	808.004	147.394	958.269	874.354	-133.908	963.184	864.982	10.8813	911.83	808.133	256.078	640.532	878.393	231.944	738.254	656.622	163.369	742.362	659.965	194.844	759.236	587.38	180.245	730.675	497.221	-245.685	659.329	868.286	-210.385	738.523	642.006	-148.211	746.516	663.285	-155.72	757.793	582.571	-136.678	732.072	496.15
684	6.83	1.979	1094.01	768.995	70.857	1090.8	818.9	-68.9637	1101.94	808.023	147.412	958.308	874.386	-133.887	963.221	865.037	10.9045	911.904	808.026	256.06	640.549	878.4	231.962	738.282	656.616	163.384	742.386	659.989	194.812	759.249	587.34	180.253	730.716	497.239	-245.625	659.426	868.318	-210.512	738.624	641.679	-148.185	746.402	663.199	-155.817	758.107	582.042	-136.608	732.305	495.777
685	6.84	2.03495	1094.14	768.839	70.9011	1090.95	818.724	-68.9324	1102.03	807.923	147.432	958.383	874.379	-133.875	963.289	865.057	10.9588	912.022	807.849	256.055	640.537	878.356	232	738.378	656.594	163.427	742.476	659.97	194.834	759.294	587.324	180.292	730.779	497.223	-245.563	659.535	868.348	-210.273	738.598	642.225	-148.056	746.166	662.76	-155.611	757.739	582.808	-136.619	732.06	496.267
686	6.85	2.10382	1094.29	768.648	70.9349	1091.11	818.423	-68.8921	1102.14	807.789	147.464	958.439	874.389	-133.857	963.362	865.01	11.0037	912.141	807.644	256.049	640.536	878.356	232.037	738.462	656.586	163.468	742.588	659.922	194.867	759.308	587.346	180.328	730.835	497.176	-245.521	659.607	868.369	-209.7	738.411	643.575	-148.027	746.151	662.608	-155.12	756.695	584.84	-136.769	731.321	497.62
687	6.86	2.13879	1094.36	768.565	70.9513	1091.18	818.359	-68.8592	1102.23	807.735	147.475	958.482	874.403	-133.852	963.423	865.028	11.0206	912.217	807.507	256.054	640.539	878.374	232.06	738.518	656.596	163.478	742.675	659.894	194.927	759.331	587.399	180.342	730.878	497.204	-245.492	659.616	868.361	-209.58	738.41	643.928	-148.003	746.228	662.552	-154.999	756.448	585.351	-136.842	731.182	497.982
688	6.87	2.122	1094.34	768.631	70.9229	1091.18	818.432	-68.8944	1102.22	807.729	147.452	958.487	874.384	-133.858	963.424	865.05	10.9694	912.206	807.488	256.057	640.516	878.349	232.042	738.536	656.6	163.444	742.713	659.827	194.969	759.349	587.43	180.336	730.88	497.229	-245.519	659.545	868.314	-209.59	738.419	643.99	-148.034	746.417	662.679	-154.99	756.337	585.508	-136.869	731.178	498.073
689	6.88	2.07801	1094.26	768.792	70.8864	1091.08	818.636	-68.9421	1102.17	807.813	147.423	958.452	874.388	-133.874	963.357	865.021	10.9186	912.123	807.533	256.079	640.507	878.349	232.011	738.494	656.617	163.378	742.682	659.797	195.012	759.346	587.51	180.308	730.828	497.247	-245.577	659.424	868.239	-209.602	738.387	644.016	-148.121	746.698	663.027	-155.006	756.256	585.594	-136.905	731.158	498.095
690	6.89	2.05674	1094.17	768.927	70.8653	1090.97	818.87	-68.9643	1102.11	807.906	147.408	958.405	874.427	-133.9	963.28	865.003	10.8893	911.973	807.681	256.091	640.494	878.365	231.996	738.424	656.635	163.363	742.603	659.868	195.039	759.345	587.541	180.287	730.759	497.265	-245.658	659.309	868.203	-209.617	738.334	644.064	-148.178	746.695	663.169	-155.015	756.202	585.644	-136.927	731.097	498.108
691	6.9	2.05897	1094.11	769.042	70.8655	1090.89	819.029	-68.95	1102.06	807.973	147.408	958.35	874.438	-133.908	963.227	865.001	10.8973	911.822	807.925	256.093	640.487	878.354	231.998	738.368	656.637	163.384	742.508	659.944	195.05	759.329	587.565	180.272	730.723	497.275	-245.709	659.282	868.228	-209.6	738.272	644.093	-148.18	746.639	663.261	-155.025	756.161	585.682	-136.91	731.014	498.166
692	6.91	2.09761	1094.06	769.114	70.9074	1090.86	819.131	-68.9178	1102.01	808.027	147.433	958.304	874.427	-133.88	963.18	864.999	10.9377	911.749	808.008	256.083	640.491	878.332	232.034	738.332	656.635	163.433	742.448	659.982	195.05	759.32	587.583	180.292	730.725	497.278	-245.718	659.327	868.274	-209.806	738.348	643.478	-148.118	746.586	663.308	-155.216	756.681	584.738	-136.774	731.315	497.536
693	6.92	2.16421	1094.08	769.133	70.9648	1090.9	819.056	-68.8558	1101.99	807.996	147.468	958.284	874.419	-133.837	963.149	864.97	11.0259	911.763	807.951	256.047	640.492	878.338	232.094	738.334	656.666	163.512	742.445	660.015	195.039	759.317	587.547	180.333	730.759	497.279	-245.665	659.392	868.292	-210.304	738.614	642.076	-148.002	746.424	663.077	-155.631	757.852	582.572	-136.521	732.107	496.09
694	6.93	2.18497	1094.16	769.066	70.9992	1090.99	818.905	-68.8256	1102.02	807.988	147.493	958.312	874.43	-133.819	963.144	864.958	11.0888	911.816	807.802	256.011	640.487	878.356	232.124	738.36	656.676	163.532	742.489	659.994	195.006	759.311	587.542	180.366	730.799	497.293	-245.589	659.491	868.323	-210.408	738.728	641.728	-147.889	746.121	662.684	-155.703	758.161	581.996	-136.421	732.351	495.693
695	6.94	2.15282	1094.26	768.946	70.9589	1091.1	818.779	-68.8748	1102.1	807.957	147.483	958.348	874.421	-133.842	963.213	864.989	11.0942	911.85	807.669	256.006	640.484	878.345	232.108	738.414	656.661	163.506	742.547	659.974	194.948	759.321	587.53	180.347	730.846	497.262	-245.555	659.56	868.355	-210.438	738.788	641.672	-147.922	746.093	662.647	-155.748	758.299	581.861	-136.432	732.486	495.566
696	6.95	2.05436	1094.32	768.884	71.0132	1091.26	818.015	-68.9766	1102.16	807.957	147.444	958.356	874.385	-133.886	963.258	864.995	11.0192	911.876	807.499	256.011	640.463	878.31	232.038	738.489	656.602	163.433	742.615	659.925	194.892	759.329	587.473	180.295	730.875	497.193	-245.557	659.524	868.323	-210.26	738.697	642.244	-148.04	746.171	662.643	-155.602	757.845	582.78	-136.611	732.211	496.179
697	6.96	1.93581	1094.34	768.888	71.2474	1091.48	816.469	-69.091	1102.17	807.954	147.386	958.365	874.335	-133.926	963.244	864.93	10.9212	911.886	807.347	256.026	640.423	878.283	231.969	738.507	656.552	163.325	742.694	659.779	194.835	759.331	587.381	180.25	730.862	497.182	-245.599	659.441	868.289	-209.816	738.459	643.579	-148.129	746.249	662.586	-155.189	756.671	584.873	-136.882	731.426	497.61
698	6.97	1.83725	1094.36	768.882	71.2484	1091.53	816.087	-69.1677	1102.14	807.935	147.346	958.334	874.315	-133.952	963.198	864.914	10.8275	911.846	807.349	256.059	640.389	878.277	231.937	738.472	656.542	163.238	742.713	659.686	194.823	759.326	587.347	180.19	730.829	497.162	-245.653	659.323	868.255	-209.734	738.389	643.904	-148.187	746.396	662.706	-155.107	756.32	585.427	-136.987	731.216	497.961
699	6.98	1.79661	1094.29	768.939	71.0781	1091.39	816.766	-69.207	1102.1	808	147.355	958.27	874.338	-133.938	963.139	864.931	10.8191	911.723	807.548	256.092	640.361	878.275	231.922	738.419	656.546	163.247	742.638	659.711	194.872	759.306	587.405	180.179	730.777	497.197	-245.719	659.272	868.308	-209.704	738.341	644.007	-148.258	746.617	663.068	-155.097	756.197	585.593	-137.009	731.106	498.086
700	6.99	1.79657	1094.19	769.114	70.7464	1091.09	818.449	-69.2095	1102.06	808.059	147.389	958.218	874.393	-133.886	963.077	864.921	10.8703	911.589	807.691	256.111	640.358	878.274	231.957	738.35	656.562	163.312	742.536	659.824	194.899	759.293	587.389	180.219	730.732	497.247	-245.726	659.242	868.324	-209.895	738.38	643.432	-148.242	746.61	663.224	-155.284	756.686	584.659	-136.897	731.385	497.508
701	7	1.81365	1094.16	769.178	70.8507	1091.11	818.165	-69.1643	1102.02	808.085	147.443	958.179	874.396	-133.827	963.01	864.878	10.9624	911.491	807.748	256.115	640.367	878.293	232.046	738.301	656.623	163.423	742.447	659.949	194.928	759.306	587.401	180.251	730.716	497.237	-245.673	659.263	868.315	-210.374	738.59	642.056	-148.175	746.58	663.251	-155.678	757.862	582.521	-136.644	732.157	496.087
702	7.01	1.87469	1094.17	769.189	71.2362	1091.36	816.656	-69.1231	1101.99	808.08	147.499	958.164	874.382	-133.765	962.976	864.886	11.067	911.447	807.723	256.088	640.384	878.309	232.149	738.275	656.703	163.51	742.422	660.031	194.964	759.308	587.43	180.303	730.749	497.29	-245.576	659.309	868.302	-210.459	738.682	641.73	-148.036	746.433	663.092	-155.727	758.149	581.996	-136.51	732.344	495.742
703	7.02	1.9107	1094.22	769.079	71.3484	1091.47	816.234	-69.0962	1102	808.017	147.545	958.17	874.37	-133.716	962.971	864.893	11.1433	911.456	807.633	256.058	640.364	878.284	232.2	738.293	656.711	163.568	742.447	660.04	195.017	759.318	587.477	180.346	730.796	497.309	-245.501	659.365	868.351	-210.441	738.737	641.613	-147.851	746.124	662.634	-155.722	758.23	581.872	-136.433	732.417	495.632
704	7.03	1.89609	1094.3	768.923	71.2234	1091.46	816.729	-69.1059	1102.07	807.921	147.557	958.204	874.367	-133.72	962.988	864.885	11.1673	911.51	807.514	256.037	640.359	878.298	232.188	738.363	656.672	163.598	742.507	660.009	195.057	759.331	587.531	180.347	730.835	497.277	-245.473	659.375	868.398	-210.422	738.781	641.617	-147.814	746.114	662.502	-155.745	758.29	581.857	-136.423	732.484	495.581
705	7.04	1.85327	1094.33	768.891	70.9982	1091.41	817.498	-69.1572	1102.12	807.892	147.539	958.241	874.372	-133.761	963.022	864.941	11.1383	911.543	807.416	256.031	640.35	878.29	232.135	738.432	656.636	163.562	742.569	659.932	195.076	759.352	587.552	180.316	730.854	497.265	-245.472	659.325	868.414	-210.219	738.687	642.251	-147.841	746.192	662.493	-155.578	757.821	582.795	-136.553	732.202	496.184
706	7.05	1.75413	1094.37	768.912	71.1515	1091.62	816.294	-69.2606	1102.11	807.88	147.511	958.26	874.372	-133.807	963.03	864.94	11.0498	911.535	807.354	256.045	640.332	878.278	232.056	738.466	656.603	163.451	742.653	659.837	195.067	759.348	587.564	180.277	730.854	497.287	-245.473	659.241	868.417	-209.755	738.444	643.597	-147.972	746.377	662.684	-155.133	756.646	584.92	-136.836	731.422	497.623
707	7.06	1.61439	1094.44	768.843	71.0923	1091.7	815.9	-69.3671	1102.1	807.833	147.457	958.276	874.345	-133.837	963.004	864.892	10.9785	911.485	807.341	256.083	640.316	878.254	232.01	738.483	656.596	163.361	742.714	659.785	195.04	759.343	587.57	180.223	730.871	497.269	-245.458	659.138	868.361	-209.67	738.381	643.93	-148.172	746.683	663.078	-155.038	756.336	585.468	-136.955	731.247	497.977
708	7.07	1.54208	1094.45	768.821	71.0347	1091.71	815.811	-69.4412	1102.08	807.787	147.447	958.272	874.323	-133.853	962.959	864.891	10.9601	911.435	807.355	256.111	640.303	878.224	231.999	738.467	656.601	163.327	742.72	659.756	195	759.339	587.536	180.223	730.871	497.257	-245.433	659.068	868.34	-209.669	738.349	644.014	-148.227	746.732	663.2	-155.03	756.25	585.624	-136.988	731.184	498.08
709	7.08	1.54133	1094.32	769.026	71.0414	1091.68	815.873	-69.4607	1102.05	807.809	147.473	958.218	874.341	-133.843	962.903	864.903	10.9855	911.347	807.423	256.131	640.298	878.237	232.029	738.434	656.624	163.362	742.64	659.824	194.989	759.322	587.545	180.233	730.827	497.274	-245.396	659.041	868.37	-209.618	738.302	644.065	-148.143	746.565	663.056	-155.011	756.23	585.676	-136.974	731.122	498.139
710	7.09	1.56438	1094.21	769.141	71.0709	1091.63	815.946	-69.4514	1101.99	807.851	147.504	958.159	874.381	-133.81	962.829	864.894	11.0494	911.247	807.513	256.131	640.31	878.259	232.084	738.375	656.647	163.438	742.53	659.894	194.962	759.305	587.519	180.25	730.798	497.292	-245.32	659.06	868.399	-209.792	738.36	643.486	-147.978	746.19	662.675	-155.207	756.746	584.727	-136.82	731.403	497.516
711	7.1	1.5638	1094.16	769.182	71.0707	1091.63	815.937	-69.4322	1101.92	807.849	147.518	958.124	874.371	-133.782	962.732	864.872	11.1052	911.176	807.513	256.112	640.325	878.289	232.143	738.317	656.676	163.496	742.473	659.945	194.924	759.308	587.452	180.262	730.792	497.264	-245.248	659.094	868.408	-210.294	738.61	642.076	-147.907	746.012	662.582	-155.647	757.888	582.549	-136.584	732.165	496.08
712	7.11	1.52952	1094.14	769.207	71.0272	1091.63	815.889	-69.457	1101.86	807.845	147.496	958.116	874.354	-133.788	962.701	864.887	11.0979	911.114	807.477	256.103	640.34	878.308	232.149	738.292	656.693	163.516	742.45	659.978	194.895	759.294	587.397	180.247	730.797	497.227	-245.241	659.103	868.441	-210.426	738.688	641.73	-147.896	745.945	662.568	-155.753	758.143	582.024	-136.524	732.349	495.727
713	7.12	1.47544	1094.14	769.162	70.9704	1091.63	815.867	-69.5267	1101.86	807.789	147.461	958.1	874.316	-133.821	962.69	864.858	11.0451	911.073	807.416	256.074	640.336	878.288	232.107	738.295	656.632	163.496	742.45	659.953	194.866	759.303	587.358	180.2	730.796	497.191	-245.242	659.08	868.476	-210.488	738.695	641.645	-147.91	745.961	662.555	-155.798	758.208	581.918	-136.54	732.391	495.632
714	7.13	1.43873	1094.14	769.159	70.9048	1091.63	815.859	-69.594	1101.89	807.715	147.434	958.088	874.302	-133.866	962.675	864.833	10.9892	911.049	807.38	256.052	640.31	878.271	232.058	738.309	656.57	163.461	742.45	659.924	194.866	759.315	587.378	180.175	730.796	497.195	-245.252	658.994	868.44	-210.286	738.563	642.254	-147.995	746.148	662.731	-155.64	757.741	582.795	-136.659	732.061	496.223
715	7.14	1.39333	1094.19	769.106	70.8449	1091.66	815.825	-69.6641	1101.94	807.688	147.418	958.121	874.35	-133.924	962.683	864.846	10.9407	911.084	807.35	256.052	640.283	878.274	232.02	738.342	656.564	163.429	742.517	659.873	194.912	759.314	587.415	180.175	730.8	497.236	-245.294	658.895	868.434	-209.776	738.304	643.656	-148.129	746.501	663.129	-155.219	756.609	584.912	-136.906	731.278	497.66
716	7.15	1.33895	1094.3	769.009	70.7844	1091.74	815.796	-69.7157	1101.99	807.701	147.393	958.15	874.376	-133.951	962.697	864.856	10.9015	911.138	807.253	256.07	640.264	878.286	232.01	738.383	656.608	163.374	742.627	659.789	194.951	759.32	587.458	180.185	730.811	497.283	-245.321	658.823	868.439	-209.677	738.299	643.995	-148.168	746.643	663.185	-155.097	756.314	585.463	-137.005	731.152	498.059
717	7.16	1.31102	1094.45	768.771	70.7884	1091.83	815.776	-69.7248	1102.02	807.666	147.382	958.193	874.362	-133.94	962.718	864.83	10.9142	911.215	807.087	256.09	640.231	878.264	232.051	738.456	656.653	163.351	742.717	659.75	195.007	759.337	587.505	180.206	730.834	497.288	-245.278	658.816	868.422	-209.636	738.343	644.052	-148.116	746.632	662.98	-155.05	756.263	585.583	-136.997	731.2	498.097
718	7.17	1.32989	1094.53	768.707	70.8118	1091.88	815.795	-69.7064	1102.06	807.583	147.403	958.228	874.37	-133.908	962.725	864.8	10.9613	911.236	807.025	256.078	640.219	878.234	232.09	738.483	656.66	163.415	742.708	659.793	195.044	759.35	587.521	180.259	730.862	497.292	-245.238	658.882	868.426	-209.591	738.368	644.045	-147.989	746.397	662.55	-155.009	756.291	585.608	-136.959	731.221	498.083
719	7.18	1.36171	1094.45	768.894	70.8291	1091.88	815.825	-69.7159	1102.07	807.533	147.419	958.209	874.401	-133.897	962.685	864.81	11.0165	911.159	807.096	256.044	640.246	878.264	232.112	738.459	656.674	163.489	742.649	659.895	195.053	759.338	587.563	180.29	730.857	497.321	-245.24	658.928	868.484	-209.784	738.455	643.442	-147.935	746.283	662.485	-155.195	756.804	584.685	-136.814	731.558	497.421
720	7.19	1.36361	1094.32	769.143	70.8273	1091.83	815.9	-69.7294	1102.02	807.587	147.421	958.147	874.393	-133.896	962.605	864.829	11.03	911.023	807.207	255.997	640.27	878.327	232.132	738.393	656.699	163.537	742.571	659.987	195.059	759.325	587.575	180.292	730.839	497.325	-245.238	658.938	868.52	-210.269	738.658	642.101	-147.855	746.171	662.494	-155.639	757.953	582.549	-136.576	732.339	495.973
721	7.2	1.33628	1094.2	769.312	70.8043	1091.74	815.974	-69.7485	1101.92	807.62	147.407	958.082	874.366	-133.896	962.503	864.808	11.0509	910.838	807.311	255.941	640.276	878.333	232.159	738.3	656.711	163.553	742.49	659.996	195.047	759.322	587.532	180.287	730.79	497.308	-245.251	658.888	868.483	-210.406	738.672	641.772	-147.882	746.179	662.708	-155.721	758.186	582.023	-136.502	732.436	495.642
722	7.21	1.28862	1094.11	769.444	70.7416	1091.68	816.015	-69.811	1101.82	807.669	147.379	958.025	874.355	-133.926	962.405	864.784	11.0498	910.632	807.497	255.894	640.277	878.313	232.153	738.226	656.716	163.541	742.43	660.012	195.026	759.314	587.493	180.258	730.755	497.284	-245.291	658.801	868.449	-210.471	738.646	641.652	-148.001	746.38	663.174	-155.753	758.188	581.933	-136.513	732.376	495.635
723	7.22	1.22656	1094.06	769.553	70.6723	1091.68	816.031	-69.9179	1101.8	807.69	147.34	958.01	874.368	-133.98	962.376	864.808	10.9726	910.568	807.545	255.879	640.279	878.32	232.11	738.222	656.718	163.492	742.396	660.021	195.013	759.324	587.503	180.221	730.757	497.302	-245.331	658.733	868.473	-210.509	738.621	641.644	-148.057	746.425	663.283	-155.801	758.198	581.931	-136.555	732.35	495.698
724	7.23	1.14198	1094.1	769.456	70.5987	1091.73	816.01	-70.0154	1101.84	807.63	147.298	958.027	874.365	-134.038	962.387	864.799	10.8799	910.637	807.349	255.89	640.274	878.323	232.065	738.272	656.685	163.452	742.428	659.998	194.993	759.326	587.515	180.202	730.771	497.278	-245.316	658.69	868.474	-210.298	738.507	642.276	-148.123	746.501	663.304	-155.652	757.724	582.838	-136.675	732.051	496.314
725	7.24	1.05959	1094.27	769.188	70.4895	1091.86	815.877	-70.1083	1101.86	807.526	147.26	958.089	874.365	-134.098	962.407	864.745	10.8101	910.754	807.048	255.898	640.235	878.307	232.016	738.344	656.608	163.414	742.516	659.918	194.934	759.303	587.438	180.202	730.798	497.249	-245.28	658.646	868.457	-209.622	738.199	644.138	-148.154	746.61	663.23	-155.063	756.199	585.628	-136.974	731.037	498.167
[truncated: 3 more columns]

## Sheet: Trial01
PathFileType	4	(X/Y/Z)	Trial01.trc
DataRate	CameraRate	NumFrames	NumMarkers	Units	OrigDataRate	OrigDataStartFrame	OrigNumFrames
100	100	569	19	mm	100	1	569
Frame#	Time	nasion			r zyg pr			l zyg pr			r should			l should			sternum			r elbow			r ulna			r radius			r hand			r finger			l elbow			l ulna			l radius			l hand			l finger
		X1	Y1	Z1	X2	Y2	Z2	X3	Y3	Z3	X4	Y4	Z4	X5	Y5	Z5	X6	Y6	Z6	X7	Y7	Z7	X8	Y8	Z8	X9	Y9	Z9	X10	Y10	Z10	X11	Y11	Z11	X12	Y12	Z12	X13	Y13	Z13	X14	Y14	Z14	X15	Y15	Z15	X16	Y16	Z16
1	0	8.1012	1086.43	780.952	75.8855	1081.95	831.215	-64.0786	1094.77	818.283	150.023	951.029	902.306	-131.741	952.553	883.402	15.6551	906.921	821.04	299.806	661.544	876.137	272.336	739.407	648.778	210.515	744.62	665.592	232.206	758.051	580.415	219.714	730.686	492.715	-276.634	670.624	874.535	-254.971	741.364	644.144	-193.167	747.222	660.991	-200.094	753.559	584.638	-185.498	730.878	500.678
2	0.01	8.11963	1086.31	781.09	75.8935	1081.8	831.303	-64.051	1094.68	818.337	150.072	950.961	902.264	-131.733	952.493	883.386	15.6757	906.852	821.18	299.848	661.468	876.058	272.362	739.338	648.782	210.489	744.61	665.574	232.243	758.011	580.467	219.687	730.615	492.736	-276.683	670.531	874.359	-254.96	741.28	644.117	-193.191	747.293	661.22	-200.125	753.528	584.634	-185.481	730.822	500.663
3	0.02	8.19464	1086.18	781.308	75.9309	1081.73	831.404	-64.0082	1094.6	818.395	150.104	950.924	902.232	-131.706	952.507	883.427	15.7053	906.858	821.273	299.871	661.439	876.017	272.401	739.311	648.769	210.48	744.63	665.527	232.292	757.961	580.474	219.691	730.605	492.754	-276.717	670.561	874.35	-254.932	741.254	644.134	-193.21	747.414	661.47	-200.116	753.526	584.651	-185.454	730.771	500.687
4	0.03	8.24538	1086.19	781.348	75.9685	1081.74	831.46	-63.9706	1094.63	818.412	150.108	950.943	902.213	-131.7	952.571	883.46	15.7388	906.939	821.311	299.86	661.451	876.006	272.413	739.35	648.771	210.487	744.679	665.539	232.347	757.95	580.515	219.7	730.627	492.78	-276.745	670.677	874.437	-254.923	741.281	644.169	-193.138	747.214	661.181	-200.102	753.565	584.681	-185.447	730.785	500.685
5	0.04	8.23642	1086.31	781.184	76.1159	1081.97	830.575	-63.9634	1094.72	818.369	150.083	951.002	902.243	-131.714	952.636	883.418	15.7317	907.077	821.243	299.84	661.492	876.021	272.401	739.416	648.765	210.498	744.715	665.551	232.305	757.985	580.51	219.698	730.679	492.768	-276.757	670.764	874.481	-254.929	741.34	644.103	-193.168	747.204	661.128	-200.096	753.624	584.644	-185.459	730.865	500.659
6	0.05	8.21314	1086.46	780.986	76.4156	1082.36	828.717	-63.9772	1094.84	818.342	150.039	951.069	902.278	-131.742	952.715	883.413	15.7152	907.242	821.148	299.81	661.58	876.076	272.341	739.481	648.719	210.494	744.731	665.547	232.199	758.045	580.465	219.677	730.72	492.729	-276.763	670.842	874.529	-254.954	741.412	644.06	-193.221	747.258	661.096	-200.084	753.667	584.592	-185.479	730.938	500.621
7	0.06	8.16963	1086.58	780.858	76.4347	1082.55	828.151	-63.9928	1094.92	818.288	150.012	951.142	902.284	-131.757	952.786	883.426	15.6959	907.36	821.097	299.785	661.68	876.125	272.296	739.521	648.687	210.485	744.728	665.559	232.128	758.146	580.438	219.652	730.743	492.702	-276.787	670.913	874.607	-254.999	741.498	644.022	-193.257	747.345	661.051	-200.081	753.683	584.573	-185.509	731	500.57
8	0.07	8.14678	1086.59	780.801	76.2707	1082.5	828.661	-64.0035	1094.92	818.295	149.997	951.18	902.277	-131.76	952.823	883.413	15.6652	907.414	821.046	299.767	661.757	876.156	272.283	739.536	648.66	210.488	744.698	665.557	232.091	758.234	580.408	219.633	730.745	492.684	-276.826	670.922	874.606	-255.054	741.572	643.967	-193.284	747.392	661.018	-200.082	753.664	584.543	-185.534	731.005	500.547
9	0.08	8.14151	1086.51	780.867	76.0998	1082.29	829.532	-64.008	1094.88	818.352	150.006	951.16	902.289	-131.767	952.8	883.386	15.6382	907.395	821.084	299.772	661.755	876.152	272.281	739.485	648.67	210.483	744.633	665.527	232.099	758.181	580.384	219.62	730.683	492.687	-276.853	670.869	874.49	-255.06	741.527	643.958	-193.286	747.359	661.01	-200.097	753.607	584.556	-185.546	730.958	500.567
10	0.09	8.14445	1086.36	781.13	76.3846	1082.31	828.535	-63.9756	1094.8	818.495	150.032	951.108	902.299	-131.758	952.731	883.379	15.6397	907.275	821.417	299.833	661.658	876.093	272.291	739.391	648.719	210.447	744.591	665.488	232.15	758.078	580.413	219.61	730.619	492.708	-276.878	670.866	874.475	-255.029	741.407	644.028	-193.265	747.274	661.025	-200.147	753.548	584.597	-185.548	730.891	500.616
11	0.1	8.20595	1086.17	781.459	76.4841	1082.24	828.366	-63.9461	1094.68	818.57	150.077	951.004	902.289	-131.736	952.68	883.402	15.6695	907.156	821.639	299.89	661.534	876.029	272.337	739.299	648.807	210.408	744.589	665.472	232.174	757.956	580.459	219.629	730.584	492.716	-276.906	670.865	874.461	-255.005	741.312	644.077	-193.239	747.186	661.077	-200.181	753.534	584.592	-185.508	730.791	500.658
12	0.11	8.31342	1086.02	781.671	76.5913	1082.19	828.391	-63.8768	1094.61	818.595	150.117	950.919	902.274	-131.699	952.673	883.415	15.751	907.115	821.715	299.922	661.466	876.002	272.397	739.235	648.856	210.417	744.617	665.464	232.225	757.873	580.535	219.672	730.571	492.706	-276.952	670.914	874.536	-254.97	741.275	644.07	-193.198	747.123	661.104	-200.17	753.534	584.564	-185.437	730.692	500.657
13	0.12	8.43432	1086.06	781.724	76.6976	1082.24	828.417	-63.8053	1094.64	818.61	150.144	950.924	902.259	-131.666	952.724	883.41	15.8151	907.192	821.679	299.938	661.465	875.971	272.443	739.26	648.833	210.479	744.671	665.511	232.271	757.871	580.56	219.709	730.605	492.754	-276.979	671.022	874.613	-254.928	741.298	644.05	-193.147	747.108	661.069	-200.101	753.56	584.562	-185.381	730.69	500.654
14	0.13	8.47834	1086.28	781.506	76.7498	1082.33	828.362	-63.7757	1094.76	818.569	150.146	950.997	902.267	-131.65	952.804	883.391	15.8354	907.366	821.54	299.929	661.51	875.973	272.441	739.364	648.736	210.535	744.744	665.577	232.278	757.94	580.513	219.73	730.68	492.75	-276.987	671.152	874.673	-254.894	741.362	644.052	-193.131	747.171	661.02	-200.044	753.616	584.559	-185.378	730.783	500.63
15	0.14	8.44354	1086.49	781.204	76.5859	1082.34	828.955	-63.7937	1094.9	818.488	150.092	951.112	902.296	-131.671	952.888	883.372	15.8077	907.566	821.329	299.867	661.602	876.034	272.381	739.467	648.675	210.541	744.766	665.562	232.202	758.048	580.474	219.711	730.733	492.709	-277.007	671.228	874.679	-254.932	741.449	644.037	-193.181	747.26	661.009	-200.034	753.67	584.545	-185.442	730.893	500.61
16	0.15	8.38018	1086.63	781.023	76.3187	1082.31	829.747	-63.8447	1094.99	818.466	150.015	951.187	902.315	-131.727	952.967	883.357	15.7228	907.7	821.205	299.782	661.724	876.135	272.3	739.531	648.665	210.502	744.75	665.531	232.097	758.171	580.441	219.671	730.754	492.693	-277.057	671.219	874.651	-255.022	741.543	643.986	-193.266	747.363	661.027	-200.046	753.675	584.535	-185.501	730.957	500.577
17	0.16	8.35164	1086.64	781.043	76.4722	1082.51	828.544	-63.8674	1095	818.487	150.001	951.227	902.348	-131.767	953.02	883.36	15.6654	907.748	821.184	299.757	661.8	876.198	272.255	739.53	648.662	210.482	744.713	665.557	232.071	758.296	580.426	219.639	730.745	492.723	-277.098	671.187	874.604	-255.095	741.598	643.966	-193.307	747.424	661.031	-200.065	753.636	584.566	-185.521	730.971	500.569
18	0.17	8.35237	1086.56	781.155	76.5541	1082.46	828.288	-63.8163	1094.97	818.512	150.033	951.222	902.31	-131.757	953.009	883.369	15.6622	907.705	821.335	299.784	661.8	876.166	272.282	739.478	648.68	210.486	744.643	665.563	232.129	758.282	580.404	219.647	730.696	492.723	-277.133	671.168	874.554	-255.083	741.568	643.958	-193.285	747.408	660.998	-200.057	753.572	584.604	-185.521	730.964	500.571
19	0.18	8.38345	1086.43	781.334	76.6626	1082.35	828.359	-63.7774	1094.91	818.573	150.085	951.162	902.288	-131.695	952.953	883.388	15.7161	907.603	821.57	299.849	661.716	876.085	272.333	739.406	648.7	210.493	744.603	665.525	232.21	758.176	580.432	219.689	730.649	492.722	-277.147	671.147	874.473	-255.029	741.473	643.971	-193.242	747.355	660.97	-200.059	753.526	584.606	-185.499	730.91	500.586
20	0.19	8.44287	1086.3	781.573	76.7181	1082.25	828.457	-63.7623	1094.84	818.709	150.133	951.084	902.291	-131.665	952.918	883.387	15.7738	907.517	821.741	299.9	661.61	876.031	272.372	739.35	648.75	210.497	744.618	665.529	232.25	758.081	580.496	219.722	730.637	492.731	-277.174	671.19	874.51	-254.99	741.402	643.988	-193.2	747.262	660.988	-200.065	753.531	584.599	-185.457	730.816	500.606
21	0.2	8.51127	1086.18	781.8	76.7892	1082.21	828.542	-63.722	1094.75	818.784	150.17	951.012	902.286	-131.644	952.909	883.427	15.8251	907.5	821.865	299.943	661.534	875.993	272.414	739.313	648.81	210.505	744.664	665.567	232.275	757.974	580.534	219.715	730.608	492.771	-277.187	671.269	874.581	-254.959	741.358	644.018	-193.184	747.183	661.019	-200.074	753.561	584.618	-185.405	730.731	500.663
22	0.21	8.58459	1086.12	781.889	76.7047	1082.09	829.314	-63.6613	1094.71	818.787	150.185	950.975	902.273	-131.618	952.919	883.435	15.8674	907.566	821.841	299.979	661.504	875.95	272.453	739.304	648.83	210.52	744.714	665.576	232.297	757.919	580.567	219.737	730.621	492.774	-277.189	671.376	874.669	-255.19	741.629	643.554	-193.162	747.146	661.045	-200.313	754.243	583.733	-185.32	731.132	499.966
23	0.22	8.59536	1086.23	781.69	76.5361	1081.97	830.272	-63.6455	1094.77	818.725	150.17	950.999	902.281	-131.612	952.971	883.403	15.8799	907.697	821.696	299.962	661.523	875.924	272.439	739.359	648.762	210.524	744.755	665.555	232.254	757.929	580.544	219.75	730.668	492.77	-277.197	671.499	874.729	-255.519	741.978	642.956	-193.165	747.168	661.063	-200.596	755.087	582.639	-185.254	731.695	499.032
24	0.23	8.51675	1086.4	781.433	76.7227	1082.26	828.92	-63.6959	1094.9	818.708	150.131	951.097	902.302	-131.65	953.053	883.407	15.8275	907.833	821.51	299.938	661.607	875.936	272.36	739.45	648.664	210.486	744.776	665.495	232.175	758.009	580.494	219.712	730.721	492.714	-277.235	671.55	874.73	-255.105	741.592	643.761	-193.207	747.247	661.052	-200.179	754.013	584.085	-185.383	731.088	500.211
25	0.24	8.42742	1086.52	781.307	76.6849	1082.37	828.533	-63.7612	1094.98	818.739	150.089	951.209	902.332	-131.7	953.123	883.434	15.7191	907.942	821.387	299.914	661.737	875.996	272.285	739.52	648.608	210.44	744.771	665.456	232.115	758.141	580.453	219.638	730.733	492.666	-277.28	671.508	874.645	-255.053	741.535	643.929	-193.254	747.342	661.031	-200.107	753.723	584.446	-185.464	730.975	500.508
26	0.25	8.34548	1086.52	781.303	76.5934	1082.41	828.364	-63.8114	1095	818.716	150.041	951.247	902.318	-131.757	953.166	883.404	15.629	907.968	821.361	299.891	661.818	876.03	272.226	739.513	648.56	210.407	744.692	665.406	232.047	758.225	580.403	219.591	730.695	492.636	-277.326	671.461	874.591	-255.102	741.542	643.896	-193.367	747.51	661.196	-200.105	753.595	584.507	-185.528	730.94	500.555
27	0.26	8.27972	1086.49	781.334	76.5431	1082.39	828.299	-63.8396	1094.97	818.731	150.025	951.235	902.309	-131.791	953.159	883.392	15.5771	907.953	821.408	299.898	661.862	876.049	272.212	739.468	648.574	210.399	744.621	665.421	232.025	758.251	580.335	219.57	730.65	492.634	-277.345	671.425	874.574	-255.132	741.547	643.865	-193.474	747.752	661.557	-200.12	753.518	584.516	-185.561	730.918	500.576
28	0.27	8.29199	1086.43	781.495	76.5706	1082.32	828.427	-63.822	1094.94	818.818	150.047	951.218	902.341	-131.757	953.133	883.437	15.5939	907.904	821.577	299.944	661.835	876.042	272.24	739.413	648.637	210.437	744.614	665.506	232.096	758.168	580.358	219.598	730.619	492.71	-277.342	671.435	874.584	-255.095	741.509	643.94	-193.459	747.666	661.544	-200.126	753.507	584.585	-185.551	730.888	500.63
29	0.28	8.36641	1086.34	781.64	76.6547	1082.26	828.564	-63.7699	1094.89	818.909	150.11	951.186	902.338	-131.684	953.111	883.452	15.7105	907.85	821.692	300.046	661.763	875.966	272.325	739.395	648.692	210.483	744.655	665.516	232.18	758.049	580.418	219.665	730.631	492.719	-277.33	671.515	874.61	-255.011	741.45	643.983	-193.338	747.378	661.206	-200.107	753.556	584.563	-185.497	730.846	500.647
30	0.29	8.49797	1086.26	781.665	76.7679	1082.25	828.593	-63.6981	1094.84	818.868	150.164	951.117	902.274	-131.62	953.099	883.409	15.8271	907.839	821.628	300.127	661.672	875.828	272.433	739.384	648.698	210.54	744.718	665.513	232.222	757.96	580.423	219.752	730.65	492.713	-277.313	671.615	874.633	-255.194	741.678	643.478	-193.226	747.259	661.046	-200.294	754.251	583.64	-185.354	731.207	499.942
31	0.3	8.59763	1086.24	781.698	76.8699	1082.25	828.675	-63.6341	1094.81	818.874	150.201	951.083	902.256	-131.583	953.112	883.415	15.9204	907.865	821.615	300.166	661.642	875.792	272.519	739.367	648.749	210.588	744.751	665.572	232.267	757.923	580.5	219.789	730.641	492.754	-277.328	671.684	874.678	-255.751	742.263	642.411	-193.129	747.212	660.99	-200.808	755.757	581.708	-185.145	732.07	498.371
32	0.31	8.58797	1086.31	781.648	76.8816	1082.29	828.69	-63.6458	1094.84	818.947	150.197	951.115	902.28	-131.603	953.14	883.436	15.8993	907.933	821.576	300.17	661.692	875.839	272.518	739.397	648.759	210.594	744.781	665.598	232.275	757.954	580.484	219.785	730.655	492.793	-277.391	671.731	874.742	-255.631	742.155	642.659	-193.095	747.213	660.982	-200.691	755.493	582.145	-185.172	731.903	498.699
33	0.32	8.47054	1086.45	781.497	76.7908	1082.32	828.622	-63.7412	1094.91	818.911	150.133	951.193	902.297	-131.672	953.189	883.405	15.8191	907.987	821.474	300.12	661.771	875.88	272.421	739.447	648.686	210.559	744.775	665.558	232.234	758.054	580.445	219.71	730.664	492.741	-277.474	671.686	874.691	-255.128	741.634	643.626	-193.204	747.387	661.148	-200.176	754.085	583.995	-185.353	731.109	500.15
34	0.33	8.33295	1086.52	781.432	76.6354	1082.35	828.529	-63.8393	1094.96	818.875	150.06	951.266	902.281	-131.763	953.251	883.376	15.6968	908.029	821.387	300.047	661.884	875.929	272.317	739.482	648.604	210.498	744.744	665.488	232.164	758.162	580.424	219.628	730.648	492.674	-277.557	671.653	874.603	-255.08	741.555	643.842	-193.392	747.708	661.55	-200.1	753.657	584.448	-185.479	730.956	500.483
35	0.34	8.23702	1086.52	781.469	76.4972	1082.39	828.428	-63.9105	1094.99	818.938	150.003	951.34	902.26	-131.837	953.329	883.409	15.5773	908.086	821.422	300.001	661.993	875.99	272.246	739.514	648.583	210.439	744.72	665.447	232.105	758.253	580.398	219.576	730.649	492.667	-277.599	671.66	874.557	-255.119	741.577	643.943	-193.462	747.704	661.594	-200.119	753.536	584.583	-185.541	730.93	500.589
36	0.35	8.21591	1086.51	781.529	76.4797	1082.39	828.473	-63.9337	1095.01	818.952	149.99	951.363	902.258	-131.863	953.353	883.395	15.5355	908.149	821.37	300.011	662.024	876.006	272.233	739.507	648.582	210.448	744.726	665.467	232.093	758.266	580.39	219.582	730.657	492.678	-277.609	671.696	874.581	-255.127	741.587	643.976	-193.434	747.515	661.279	-200.115	753.525	584.621	-185.54	730.932	500.634
37	0.36	8.25602	1086.5	781.425	76.5672	1082.34	828.54	-63.8681	1094.98	818.874	150.013	951.314	902.232	-131.802	953.294	883.325	15.628	908.15	821.242	300.066	661.946	875.942	272.288	739.48	648.584	210.5	744.712	665.495	232.126	758.149	580.365	219.626	730.629	492.66	-277.586	671.735	874.583	-255.047	741.542	643.934	-193.361	747.398	661.095	-200.069	753.549	584.538	-185.48	730.901	500.583
38	0.37	8.37079	1086.4	781.486	76.6843	1082.26	828.584	-63.7683	1094.92	818.819	150.083	951.236	902.228	-131.697	953.224	883.3	15.7746	908.09	821.29	300.147	661.836	875.861	272.402	739.434	648.665	210.528	744.72	665.498	232.181	758.002	580.42	219.711	730.614	492.675	-277.561	671.806	874.624	-254.949	741.48	643.913	-193.237	747.278	660.973	-199.997	753.569	584.452	-185.377	730.831	500.567
39	0.38	8.44728	1086.27	781.641	76.7549	1082.22	828.643	-63.7119	1094.84	818.862	150.127	951.197	902.204	-131.665	953.222	883.33	15.8471	908.036	821.469	300.209	661.789	875.8	272.487	739.403	648.725	210.555	744.774	665.515	232.216	757.893	580.474	219.769	730.625	492.688	-277.567	671.921	874.712	-255.171	741.717	643.448	-193.157	747.201	660.929	-200.216	754.246	583.597	-185.253	731.163	499.895
40	0.39	8.43955	1086.24	781.687	76.5713	1082.09	829.371	-63.7316	1094.83	818.855	150.098	951.223	902.182	-131.697	953.234	883.28	15.8316	908.069	821.413	300.216	661.802	875.748	272.457	739.409	648.672	210.537	744.819	665.502	232.193	757.878	580.438	219.734	730.627	492.685	-277.599	671.983	874.702	-255.52	742.055	642.849	-193.199	747.209	660.929	-200.551	755.078	582.548	-185.202	731.659	499.014
41	0.4	8.33977	1086.29	781.637	76.1444	1081.81	831.042	-63.8225	1094.87	818.85	150.037	951.302	902.218	-131.779	953.274	883.257	15.7354	908.108	821.369	300.168	661.876	875.786	272.37	739.46	648.617	210.475	744.82	665.444	232.149	757.967	580.401	219.67	730.643	492.669	-277.682	671.925	874.567	-255.133	741.619	643.651	-193.288	747.269	661.005	-200.185	753.968	584.029	-185.376	731.026	500.207
42	0.41	8.20703	1086.33	781.624	75.9256	1081.75	831.509	-63.9445	1094.88	818.902	149.965	951.385	902.27	-131.874	953.349	883.333	15.5929	908.125	821.399	300.106	661.987	875.881	272.262	739.503	648.566	210.409	744.779	665.404	232.111	758.091	580.375	219.596	730.644	492.681	-277.785	671.85	874.489	-255.12	741.528	643.872	-193.404	747.447	661.248	-200.134	753.626	584.462	-185.496	730.903	500.545
43	0.42	8.10445	1086.37	781.545	75.7813	1081.81	831.495	-64.0161	1094.9	818.881	149.919	951.432	902.269	-131.945	953.393	883.379	15.4833	908.2	821.253	300.034	662.107	875.948	272.195	739.516	648.521	210.37	744.725	665.375	232.057	758.201	580.32	219.54	730.634	492.613	-277.852	671.801	874.471	-255.168	741.55	643.895	-193.519	747.744	661.602	-200.136	753.479	584.567	-185.548	730.884	500.608
44	0.43	8.07592	1086.44	781.418	75.7168	1081.94	831.288	-64.0322	1094.91	818.808	149.896	951.451	902.286	-131.974	953.438	883.348	15.4536	908.297	821.024	300.002	662.158	875.956	272.192	739.534	648.495	210.394	744.722	665.357	232.03	758.278	580.292	219.526	730.648	492.579	-277.866	671.826	874.48	-255.183	741.586	643.849	-193.549	747.85	661.651	-200.106	753.454	584.516	-185.544	730.886	500.57
45	0.44	8.12249	1086.48	781.446	75.7759	1081.94	831.311	-63.9918	1094.94	818.842	149.91	951.47	902.313	-131.947	953.464	883.326	15.5255	908.306	821.09	300.034	662.149	875.919	272.252	739.566	648.537	210.458	744.781	665.429	232.087	758.227	580.315	219.572	730.671	492.624	-277.843	671.928	874.518	-255.136	741.594	643.858	-193.494	747.763	661.516	-200.06	753.511	584.51	-185.502	730.901	500.581
46	0.45	8.20264	1086.43	781.576	76.0515	1081.98	830.774	-63.9046	1094.95	818.926	149.971	951.44	902.325	-131.877	953.442	883.368	15.6337	908.317	821.227	300.14	662.088	875.878	272.346	739.561	648.623	210.518	744.85	665.511	232.188	758.12	580.38	219.665	730.688	492.698	-277.802	672.045	874.609	-255.025	741.582	643.91	-193.379	747.448	661.162	-200.005	753.603	584.533	-185.425	730.879	500.64
47	0.46	8.32576	1086.33	781.686	76.5024	1082.18	829.232	-63.8121	1094.93	818.878	150.025	951.356	902.297	-131.787	953.407	883.376	15.7547	908.313	821.258	300.241	662.01	875.823	272.479	739.511	648.722	210.592	744.868	665.571	232.271	757.994	580.444	219.768	730.675	492.743	-277.755	672.117	874.69	-255.188	741.8	643.447	-193.261	747.312	661.048	-200.186	754.288	583.653	-185.265	731.225	499.933
48	0.47	8.37086	1086.28	781.7	76.5242	1082.09	829.585	-63.7901	1094.86	818.848	150.054	951.303	902.263	-131.742	953.363	883.333	15.8043	908.279	821.203	300.302	661.955	875.766	272.533	739.469	648.719	210.625	744.846	665.573	232.3	757.938	580.5	219.818	730.662	492.729	-277.763	672.097	874.647	-255.503	742.08	642.829	-193.167	747.247	660.922	-200.486	755.085	582.552	-185.124	731.672	499.029
49	0.48	8.27091	1086.29	781.668	76.2923	1081.95	830.339	-63.8767	1094.84	818.895	150.02	951.335	902.23	-131.812	953.357	883.32	15.711	908.243	821.231	300.304	662.014	875.775	272.465	739.468	648.656	210.567	744.795	665.527	232.239	757.974	580.457	219.74	730.622	492.721	-277.84	672.02	874.558	-255.106	741.609	643.635	-193.173	747.262	660.881	-200.095	753.947	583.986	-185.276	731.006	500.193
50	0.49	8.09638	1086.33	781.687	76.3297	1082.18	829.047	-64.0181	1094.89	818.971	149.937	951.414	902.234	-131.944	953.413	883.343	15.5419	908.232	821.296	300.231	662.142	875.831	272.322	739.503	648.575	210.459	744.754	665.466	232.146	758.074	580.39	219.618	730.612	492.677	-277.928	671.946	874.458	-255.102	741.524	643.828	-193.338	747.452	661.107	-200.074	753.591	584.417	-185.419	730.887	500.496
51	0.5	7.98214	1086.38	781.691	76.0559	1082.16	829.427	-64.1215	1094.9	819.011	149.84	951.5	902.27	-132.05	953.485	883.4	15.3741	908.308	821.242	300.148	662.265	875.901	272.225	739.54	648.53	210.389	744.745	665.41	232.084	758.179	580.339	219.525	730.631	492.635	-277.981	671.885	874.339	-255.172	741.549	643.888	-193.551	747.769	661.582	-200.128	753.462	584.581	-185.511	730.877	500.599
52	0.51	7.9657	1086.42	781.641	75.8097	1082.07	830.272	-64.1595	1094.91	818.998	149.787	951.541	902.312	-132.106	953.53	883.401	15.2959	908.403	821.212	300.12	662.318	875.919	272.193	739.571	648.521	210.386	744.77	665.415	232.06	758.225	580.322	219.503	730.649	492.628	-278.009	671.885	874.326	-255.209	741.586	643.899	-193.617	747.864	661.732	-200.159	753.462	584.634	-185.544	730.868	500.655
53	0.52	7.9976	1086.46	781.596	76.0096	1082.18	829.72	-64.1239	1094.94	818.989	149.794	951.54	902.302	-132.078	953.539	883.355	15.3652	908.518	821.107	300.172	662.322	875.909	272.242	739.593	648.532	210.451	744.825	665.452	232.072	758.187	580.342	219.54	730.653	492.645	-277.996	671.985	874.432	-255.177	741.606	643.899	-193.554	747.771	661.571	-200.102	753.511	584.59	-185.52	730.875	500.656
54	0.53	8.10088	1086.49	781.506	75.9263	1081.99	831.018	-64.0335	1094.96	818.957	149.857	951.509	902.273	-131.972	953.535	883.318	15.5483	908.576	821.026	300.269	662.275	875.844	272.347	739.618	648.549	210.522	744.868	665.474	232.083	758.1	580.364	219.625	730.677	492.654	-277.942	672.134	874.575	-255.067	741.587	643.858	-193.422	747.598	661.292	-200.001	753.595	584.487	-185.414	730.867	500.568
55	0.54	8.1974	1086.45	781.524	75.985	1081.93	831.33	-63.94	1094.93	818.934	149.91	951.47	902.232	-131.882	953.51	883.298	15.6792	908.548	820.974	300.358	662.225	875.758	272.442	739.593	648.545	210.579	744.904	665.508	232.114	757.998	580.391	219.716	730.675	492.65	-277.898	672.238	874.631	-254.965	741.564	643.811	-193.369	747.794	661.547	-199.935	753.659	584.417	-185.314	730.843	500.51
56	0.55	8.20306	1086.36	781.646	75.9813	1081.82	831.567	-63.9285	1094.88	818.93	149.944	951.447	902.218	-131.873	953.492	883.317	15.6966	908.467	821.073	300.406	662.218	875.744	272.475	739.53	648.579	210.595	744.916	665.522	232.173	757.932	580.433	219.726	730.634	492.652	-277.901	672.217	874.564	-254.95	741.537	643.806	-193.341	747.689	661.484	-199.932	753.642	584.439	-185.288	730.811	500.523
57	0.56	8.13817	1086.23	781.835	75.8679	1081.68	831.845	-63.9746	1094.81	818.998	149.917	951.462	902.236	-131.915	953.482	883.365	15.5939	908.373	821.29	300.403	662.239	875.759	272.44	739.479	648.625	210.543	744.859	665.509	232.198	757.918	580.413	219.67	730.576	492.658	-277.954	672.127	874.476	-254.999	741.493	643.858	-193.311	747.391	661.121	-199.984	753.567	584.467	-185.332	730.765	500.568
58	0.57	8.02943	1086.16	781.88	75.7124	1081.61	831.94	-64.0589	1094.78	819.047	149.87	951.497	902.274	-131.986	953.472	883.384	15.4555	908.327	821.454	300.356	662.275	875.806	272.348	739.444	648.585	210.455	744.776	665.44	232.183	757.976	580.368	219.606	730.546	492.644	-278.006	672.03	874.383	-255.07	741.466	643.87	-193.404	747.453	661.221	-200.057	753.484	584.519	-185.421	730.763	500.602
59	0.58	7.93392	1086.21	781.767	75.5763	1081.66	831.847	-64.1329	1094.79	819.069	149.833	951.534	902.276	-132.069	953.52	883.405	15.3338	908.388	821.421	300.308	662.357	875.865	272.262	739.464	648.533	210.407	744.755	665.378	232.152	758.076	580.365	219.55	730.542	492.607	-278.054	671.986	874.311	-255.131	741.488	643.863	-193.56	747.728	661.565	-200.115	753.434	584.548	-185.491	730.795	500.609
60	0.59	7.88707	1086.3	781.639	75.5207	1081.8	831.655	-64.1824	1094.82	819.071	149.812	951.589	902.291	-132.108	953.619	883.434	15.3017	908.533	821.181	300.266	662.44	875.883	272.226	739.535	648.5	210.407	744.791	665.351	232.078	758.16	580.305	219.526	730.598	492.582	-278.074	672.017	874.303	-255.175	741.572	643.858	-193.577	747.746	661.489	-200.108	753.449	584.521	-185.523	730.867	500.616
61	0.6	7.9405	1086.44	781.451	75.5987	1081.97	831.452	-64.1621	1094.91	818.982	149.825	951.636	902.282	-132.075	953.705	883.419	15.3788	908.706	820.894	300.258	662.462	875.868	272.261	739.62	648.457	210.471	744.864	665.425	232.049	758.211	580.306	219.576	730.691	492.58	-278.077	672.118	874.358	-255.155	741.652	643.825	-193.485	747.562	661.16	-200.052	753.526	584.537	-185.489	730.918	500.611
62	0.61	8.06105	1086.54	781.355	75.7366	1082.06	831.307	-64.0834	1094.96	818.896	149.846	951.648	902.284	-132.018	953.746	883.396	15.5183	908.834	820.75	300.28	662.438	875.861	272.327	739.672	648.452	210.574	744.943	665.501	232.116	758.202	580.355	219.65	730.752	492.595	-278.058	672.249	874.489	-255.077	741.67	643.851	-193.444	747.614	661.28	-199.971	753.597	584.512	-185.408	730.929	500.611
63	0.62	8.13635	1086.5	781.426	75.8514	1082.01	831.398	-64.0175	1094.92	818.915	149.872	951.625	902.304	-131.963	953.726	883.404	15.6378	908.808	820.888	300.32	662.387	875.861	272.411	739.676	648.536	210.619	744.989	665.565	232.182	758.15	580.406	219.713	730.754	492.662	-278.047	672.335	874.574	-255.007	741.615	643.91	-193.414	747.705	661.448	-199.924	753.615	584.499	-185.347	730.908	500.634
64	0.63	8.16395	1086.38	781.584	75.8762	1081.87	831.601	-63.9956	1094.84	818.983	149.897	951.592	902.297	-131.928	953.673	883.411	15.6633	908.687	821.089	300.353	662.332	875.842	272.465	739.608	648.632	210.596	744.982	665.561	232.217	758.068	580.43	219.731	730.704	492.702	-278.059	672.329	874.562	-254.987	741.556	643.931	-193.345	747.423	661.137	-199.938	753.6	584.488	-185.33	730.839	500.65
65	0.64	8.11617	1086.21	781.702	75.8258	1081.7	831.816	-64.0143	1094.74	818.986	149.921	951.564	902.245	-131.923	953.613	883.383	15.6277	908.557	821.21	300.37	662.287	875.773	272.443	739.516	648.608	210.534	744.909	665.455	232.228	757.991	580.395	219.691	730.607	492.66	-278.09	672.24	874.417	-254.997	741.489	643.877	-193.318	747.336	661.027	-199.985	753.533	584.482	-185.332	730.752	500.652
66	0.65	8.03947	1086.09	781.822	75.7347	1081.59	831.949	-64.0706	1094.68	819.031	149.915	951.58	902.243	-131.96	953.596	883.336	15.529	908.443	821.378	300.371	662.278	875.744	272.377	739.458	648.562	210.461	744.823	665.352	232.21	757.985	580.378	219.645	730.543	492.62	-278.147	672.16	874.264	-255.032	741.432	643.848	-193.39	747.433	661.17	-200.028	753.437	584.464	-185.364	730.724	500.628
67	0.66	7.96216	1086.1	781.798	75.6509	1081.55	831.979	-64.1297	1094.69	819.033	149.892	951.608	902.25	-132.015	953.64	883.348	15.4454	908.421	821.454	300.338	662.323	875.764	272.307	739.451	648.544	210.42	744.787	665.338	232.198	758.017	580.331	219.606	730.546	492.599	-278.202	672.132	874.183	-255.078	741.44	643.849	-193.528	747.702	661.599	-200.076	753.401	584.544	-185.422	730.739	500.622
68	0.67	7.92778	1086.2	781.582	75.616	1081.66	831.751	-64.1407	1094.75	819.001	149.86	951.632	902.229	-132.048	953.715	883.341	15.4025	908.581	821.236	300.304	662.365	875.811	272.273	739.478	648.51	210.423	744.789	665.349	232.149	758.033	580.269	219.565	730.556	492.61	-278.231	672.166	874.204	-255.103	741.496	643.847	-193.544	747.703	661.522	-200.083	753.424	584.558	-185.467	730.78	500.631
69	0.68	7.94814	1086.34	781.401	75.6402	1081.84	831.427	-64.1247	1094.82	818.922	149.851	951.64	902.213	-132.046	953.777	883.29	15.3984	908.832	820.849	300.297	662.407	875.833	272.283	739.553	648.458	210.474	744.841	665.37	232.084	758.061	580.257	219.569	730.598	492.579	-278.231	672.294	874.348	-255.105	741.591	643.794	-193.494	747.508	661.144	-200.046	753.482	584.463	-185.467	730.843	500.602
70	0.69	8.00716	1086.48	781.28	75.6881	1081.99	831.257	-64.0837	1094.9	818.902	149.847	951.668	902.226	-132.02	953.874	883.323	15.4482	909.045	820.669	300.31	662.431	875.826	272.319	739.626	648.463	210.503	744.925	665.397	232.051	758.098	580.278	219.601	730.672	492.577	-278.215	672.454	874.485	-255.107	741.677	643.776	-193.474	747.478	661.035	-200.011	753.558	584.426	-185.434	730.913	500.567
71	0.7	8.04674	1086.55	781.16	75.7384	1082.1	831.115	-64.056	1094.95	818.847	149.85	951.701	902.224	-131.986	953.947	883.299	15.5103	909.166	820.613	300.313	662.437	875.824	272.353	739.689	648.498	210.534	744.998	665.445	232.04	758.135	580.314	219.631	730.723	492.591	-278.207	672.537	874.515	-255.094	741.74	643.795	-193.476	747.62	661.173	-199.987	753.613	584.467	-185.406	730.962	500.551
72	0.71	8.08053	1086.52	781.127	75.7869	1082.07	831.154	-64.024	1094.94	818.805	149.866	951.711	902.206	-131.962	953.952	883.275	15.5448	909.169	820.605	300.328	662.415	875.784	272.37	739.678	648.456	210.563	744.995	665.452	232.072	758.115	580.284	219.644	730.719	492.564	-278.197	672.543	874.483	-255.064	741.728	643.764	-193.499	747.783	661.393	-199.963	753.603	584.447	-185.387	730.954	500.538
73	0.72	8.09239	1086.35	781.351	75.7991	1081.88	831.44	-64.0161	1094.87	818.863	149.905	951.669	902.205	-131.96	953.892	883.309	15.5562	909.009	820.889	300.351	662.363	875.741	272.364	739.594	648.475	210.558	744.946	665.456	232.159	758.061	580.342	219.652	730.652	492.6	-278.258	672.478	874.414	-255.075	741.637	643.831	-193.423	747.506	661.102	-199.978	753.523	584.448	-185.386	730.861	500.574
74	0.73	8.06192	1086.11	781.692	75.7554	1081.63	831.798	-64.0337	1094.74	818.969	149.922	951.624	902.19	-131.972	953.801	883.352	15.5094	908.796	821.25	300.363	662.306	875.709	272.342	739.482	648.541	210.496	744.889	665.44	232.187	757.997	580.38	219.609	730.548	492.638	-278.334	672.403	874.325	-255.086	741.518	643.871	-193.43	747.501	661.202	-200.039	753.436	584.462	-185.394	730.745	500.627
75	0.74	8.0251	1085.97	781.833	75.7205	1081.45	832.024	-64.0447	1094.63	819.017	149.934	951.602	902.176	-131.982	953.747	883.315	15.4802	908.673	821.395	300.369	662.261	875.671	272.316	739.412	648.539	210.437	744.82	665.353	232.168	757.94	580.334	219.56	730.478	492.594	-278.361	672.359	874.255	-255.086	741.449	643.845	-193.511	747.705	661.564	-200.08	753.377	584.483	-185.397	730.664	500.637
76	0.75	8.0479	1085.96	781.817	75.7264	1081.47	831.973	-64.0195	1094.61	819.02	149.937	951.617	902.183	-131.976	953.783	883.272	15.4867	908.682	821.4	300.38	662.27	875.675	272.335	739.415	648.541	210.444	744.816	665.33	232.189	757.91	580.319	219.572	730.48	492.57	-278.359	672.41	874.234	-255.064	741.463	643.795	-193.492	747.664	661.469	-200.064	753.381	584.488	-185.379	730.675	500.632
77	0.76	8.0838	1086.1	781.707	75.7775	1081.63	831.802	-63.996	1094.73	818.977	149.937	951.68	902.212	-131.951	953.885	883.287	15.5483	908.858	821.216	300.365	662.346	875.736	272.361	739.501	648.537	210.504	744.902	665.404	232.205	757.968	580.32	219.606	730.558	492.591	-278.371	672.527	874.31	-255.051	741.546	643.783	-193.426	747.478	661.115	-200.017	753.465	584.503	-185.372	730.751	500.606
78	0.77	8.10876	1086.33	781.418	75.8349	1081.86	831.431	-63.9612	1094.86	818.842	149.935	951.718	902.225	-131.919	954	883.274	15.6073	909.158	820.819	300.341	662.423	875.794	272.375	739.608	648.493	210.558	744.999	665.45	232.159	758.064	580.28	219.642	730.662	492.593	-278.36	672.675	874.456	-255.042	741.667	643.763	-193.432	747.474	661.016	-199.951	753.576	584.471	-185.369	730.859	500.557
79	0.78	8.12858	1086.5	781.108	75.8677	1082.07	831.066	-63.9418	1094.93	818.743	149.929	951.737	902.201	-131.891	954.071	883.238	15.6196	909.416	820.469	300.339	662.468	875.814	272.386	739.677	648.454	210.601	745.05	665.47	232.117	758.128	580.283	219.671	730.724	492.561	-278.348	672.747	874.508	-255.043	741.747	643.705	-193.444	747.62	661.126	-199.907	753.629	584.428	-185.358	730.935	500.555
80	0.79	8.11317	1086.53	781.011	76.0013	1082.23	830.277	-63.9525	1094.93	818.761	149.933	951.746	902.18	-131.896	954.094	883.223	15.5815	909.533	820.323	300.366	662.487	875.806	272.397	739.703	648.445	210.607	745.048	665.466	232.072	758.162	580.286	219.666	730.739	492.543	-278.376	672.738	874.478	-255.089	741.778	643.696	-193.472	747.81	661.333	-199.923	753.61	584.406	-185.373	730.939	500.569
81	0.8	8.05775	1086.43	781.189	76.2694	1082.34	828.854	-64.0108	1094.87	818.842	149.936	951.753	902.179	-131.934	954.082	883.252	15.5386	909.497	820.428	300.369	662.495	875.783	272.367	739.662	648.434	210.577	745.015	665.47	232.088	758.178	580.304	219.619	730.689	492.566	-278.427	672.666	874.382	-255.132	741.746	643.735	-193.46	747.603	661.064	-199.972	753.555	584.46	-185.419	730.897	500.591
82	0.81	8.01971	1086.23	781.452	76.1287	1082.08	829.407	-64.038	1094.75	818.895	149.938	951.743	902.17	-131.968	954.035	883.278	15.51	909.302	820.732	300.378	662.48	875.77	272.336	739.589	648.457	210.523	744.958	665.424	232.152	758.143	580.316	219.577	730.605	492.576	-278.487	672.59	874.286	-255.136	741.652	643.744	-193.512	747.633	661.197	-200.024	753.45	584.526	-185.444	730.822	500.615
83	0.82	8.02775	1086.02	781.75	75.9244	1081.77	830.485	-64.0277	1094.61	818.992	149.952	951.702	902.162	-131.968	953.977	883.31	15.5144	909.073	821.054	300.417	662.425	875.749	272.325	739.504	648.493	210.492	744.913	665.422	232.199	758.039	580.32	219.561	730.528	492.592	-278.536	672.544	874.229	-255.117	741.554	643.794	-193.59	747.806	661.586	-200.06	753.384	584.524	-185.43	730.747	500.658
84	0.83	8.01999	1085.91	781.835	76.2063	1081.96	829.065	-64.0068	1094.52	819.016	149.976	951.671	902.162	-131.94	953.946	883.341	15.5466	908.981	821.166	300.472	662.387	875.713	272.343	739.46	648.493	210.489	744.922	665.42	232.203	757.963	580.313	219.571	730.506	492.58	-278.555	672.578	874.271	-255.103	741.519	643.833	-193.527	747.696	661.482	-200.054	753.396	584.532	-185.394	730.689	500.661
85	0.84	8.0402	1085.92	781.708	76.34	1082.05	828.633	-63.975	1094.53	818.94	149.987	951.658	902.12	-131.898	953.945	883.305	15.6304	909.038	821.064	300.535	662.381	875.681	272.404	739.471	648.473	210.512	744.964	665.373	232.175	757.904	580.299	219.607	730.537	492.56	-278.526	672.686	874.337	-255.067	741.551	643.786	-193.401	747.438	661.044	-200.002	753.474	584.463	-185.345	730.682	500.602
86	0.85	8.11061	1086.02	781.516	76.4409	1082.14	828.469	-63.9018	1094.6	818.903	150.002	951.661	902.064	-131.826	954.014	883.235	15.7105	909.145	820.897	300.566	662.388	875.654	272.466	739.529	648.457	210.557	745.018	665.367	232.168	757.912	580.304	219.648	730.581	492.514	-278.489	672.87	874.466	-255.004	741.614	643.686	-193.359	747.524	661.033	-199.93	753.545	584.332	-185.265	730.719	500.525
87	0.86	8.12882	1086.14	781.33	76.3462	1082.11	829.157	-63.8702	1094.68	818.853	150.006	951.724	902.094	-131.807	954.121	883.226	15.7287	909.289	820.728	300.56	662.459	875.696	272.492	739.605	648.457	210.62	745.085	665.426	232.206	757.978	580.325	219.68	730.644	492.561	-278.458	672.994	874.561	-254.968	741.682	643.667	-193.423	747.865	661.435	-199.881	753.603	584.351	-185.24	730.794	500.526
88	0.87	8.07697	1086.25	781.278	76.1091	1082.02	830.06	-63.9448	1094.77	818.852	149.983	951.785	902.183	-131.864	954.213	883.33	15.6578	909.432	820.603	300.502	662.538	875.751	272.448	739.67	648.46	210.628	745.117	665.488	232.177	758.048	580.311	219.665	730.685	492.604	-278.472	673.006	874.56	-255.031	741.75	643.709	-193.499	747.865	661.458	-199.902	753.625	584.395	-185.318	730.878	500.577
89	0.88	7.96881	1086.3	781.251	76.0737	1082.14	829.514	-64.0504	1094.81	818.915	149.924	951.8	902.168	-131.935	954.237	883.375	15.5359	909.547	820.469	300.422	662.59	875.793	272.374	739.69	648.453	210.576	745.079	665.449	232.12	758.141	580.296	219.608	730.673	492.584	-278.513	672.894	874.45	-255.134	741.782	643.722	-193.544	747.632	661.179	-199.981	753.582	584.416	-185.425	730.893	500.611
90	0.89	7.887	1086.29	781.323	75.6789	1081.97	830.811	-64.1321	1094.79	818.961	149.893	951.801	902.143	-131.98	954.214	883.391	15.4454	909.55	820.388	300.383	662.596	875.801	272.317	739.654	648.432	210.526	745.003	665.399	232.079	758.23	580.255	219.552	730.629	492.545	-278.564	672.759	874.348	-255.207	741.751	643.723	-193.599	747.694	661.282	-200.033	753.495	584.435	-185.479	730.877	500.604
91	0.9	7.86609	1086.25	781.384	75.5786	1081.84	831.284	-64.1437	1094.75	819.037	149.909	951.8	902.15	-131.975	954.17	883.382	15.4647	909.463	820.494	300.386	662.582	875.774	272.31	739.606	648.443	210.522	744.962	665.385	232.091	758.235	580.257	219.543	730.577	492.555	-278.592	672.675	874.272	-255.221	741.722	643.731	-193.639	747.893	661.572	-200.043	753.416	584.51	-185.488	730.837	500.62
92	0.91	7.89513	1086.18	781.441	75.6298	1081.7	831.569	-64.111	1094.69	819.057	149.943	951.795	902.149	-131.946	954.139	883.338	15.5177	909.369	820.628	300.415	662.547	875.739	272.343	739.568	648.423	210.543	744.953	665.393	232.138	758.154	580.243	219.583	730.546	492.564	-278.577	672.658	874.227	-255.171	741.675	643.756	-193.615	747.915	661.64	-200.012	753.387	584.514	-185.452	730.801	500.608
93	0.92	7.97699	1086.1	781.592	75.7262	1081.65	831.649	-64.0521	1094.65	819.035	149.979	951.747	902.121	-131.909	954.101	883.288	15.6136	909.254	820.751	300.449	662.492	875.687	272.39	739.559	648.408	210.571	744.981	665.405	232.217	758.055	580.287	219.613	730.555	492.559	-278.533	672.721	874.281	-255.101	741.623	643.745	-193.523	747.782	661.455	-199.987	753.404	584.465	-185.382	730.762	500.576
94	0.93	8.04421	1086.07	781.657	75.7789	1081.65	831.711	-64.0016	1094.64	819.032	149.999	951.704	902.149	-131.87	954.06	883.254	15.6852	909.173	820.759	300.495	662.426	875.655	272.446	739.556	648.444	210.591	745.036	665.417	232.258	757.972	580.311	219.627	730.568	492.542	-278.502	672.812	874.412	-255.04	741.588	643.77	-193.397	747.464	661.098	-199.967	753.472	584.424	-185.316	730.713	500.58
95	0.94	8.06282	1086.1	781.61	75.8082	1081.71	831.682	-63.9746	1094.65	818.996	149.996	951.687	902.165	-131.851	954.063	883.298	15.7223	909.142	820.81	300.522	662.392	875.671	272.467	739.558	648.47	210.593	745.086	665.437	232.248	757.928	580.309	219.637	730.594	492.555	-278.474	672.898	874.531	-255.013	741.61	643.782	-193.378	747.372	661.028	-199.943	753.538	584.388	-185.284	730.701	500.607
96	0.95	8.0776	1086.16	781.571	75.8011	1081.79	831.652	-63.9978	1094.71	818.965	149.983	951.712	902.166	-131.864	954.091	883.304	15.7158	909.183	820.783	300.508	662.382	875.642	272.469	739.575	648.477	210.592	745.091	665.456	232.245	757.925	580.325	219.639	730.616	492.561	-278.466	672.903	874.529	-255.011	741.647	643.754	-193.383	747.379	660.974	-199.934	753.593	584.368	-185.278	730.74	500.603
97	0.96	8.02977	1086.26	781.493	75.7721	1081.83	831.648	-64.0369	1094.77	818.981	149.977	951.743	902.157	-131.883	954.108	883.279	15.6701	909.221	820.654	300.507	662.429	875.652	272.442	739.604	648.44	210.592	745.073	665.425	232.223	757.975	580.346	219.637	730.62	492.548	-278.464	672.856	874.472	-255.037	741.67	643.712	-193.394	747.435	660.938	-199.94	753.59	584.383	-185.31	730.795	500.578
98	0.97	7.93559	1086.35	781.424	75.6612	1081.91	831.544	-64.0926	1094.81	818.998	149.966	951.772	902.136	-131.921	954.128	883.307	15.597	909.3	820.478	300.489	662.503	875.686	272.397	739.631	648.428	210.58	745.05	665.414	232.178	758.06	580.328	219.606	730.612	492.577	-278.474	672.757	874.369	-255.086	741.699	643.726	-193.452	747.621	661.098	-199.965	753.552	584.435	-185.379	730.845	500.559
99	0.98	7.82414	1086.39	781.427	75.4712	1082.03	831.391	-64.2066	1094.84	819.004	149.926	951.798	902.123	-132.002	954.121	883.328	15.4742	909.381	820.306	300.44	662.573	875.745	272.345	739.633	648.439	210.532	745.024	665.413	232.097	758.16	580.252	219.544	730.603	492.567	-278.485	672.627	874.271	-255.181	741.735	643.754	-193.579	747.922	661.495	-200.011	753.502	584.456	-185.458	730.871	500.591
100	0.99	7.74426	1086.38	781.403	75.3567	1082.08	831.302	-64.2888	1094.81	819.018	149.889	951.774	902.108	-132.054	954.089	883.308	15.3933	909.382	820.226	300.404	662.586	875.766	272.307	739.623	648.438	210.52	744.981	665.42	232.013	758.206	580.199	219.509	730.58	492.536	-278.502	672.541	874.27	-255.249	741.724	643.762	-193.614	747.855	661.433	-200.049	753.448	584.454	-185.499	730.858	500.584
101	1	7.73434	1086.35	781.416	75.3717	1082.05	831.329	-64.3049	1094.79	819.015	149.888	951.727	902.096	-132.038	954.029	883.29	15.4205	909.3	820.283	300.414	662.542	875.772	272.313	739.596	648.436	210.536	744.954	665.42	232.031	758.15	580.213	219.515	730.548	492.547	-278.467	672.522	874.296	-255.215	741.66	643.754	-193.558	747.566	661.126	-200.057	753.402	584.457	-185.487	730.81	500.595
102	1.01	7.79462	1086.3	781.493	75.4516	1081.94	831.559	-64.2649	1094.75	819.07	149.907	951.687	902.092	-131.987	953.977	883.297	15.5121	909.142	820.492	300.475	662.484	875.766	272.367	739.576	648.469	210.556	744.993	665.447	232.107	758.036	580.222	219.559	730.55	492.578	-278.406	672.549	874.317	-255.144	741.591	643.773	-193.499	747.439	661.056	-200.023	753.431	584.421	-185.423	730.745	500.614
103	1.02	7.89664	1086.22	781.584	75.5519	1081.86	831.728	-64.1912	1094.69	819.078	149.938	951.64	902.064	-131.925	953.935	883.253	15.6225	908.993	820.66	300.54	662.421	875.692	272.425	739.546	648.463	210.569	745.039	665.429	232.182	757.916	580.252	219.6	730.553	492.581	-278.364	672.633	874.386	-255.052	741.561	643.768	-193.427	747.36	661.01	-200.001	753.5	584.38	-185.342	730.692	500.577
104	1.03	7.96809	1086.17	781.669	75.641	1081.86	831.692	-64.124	1094.65	819.022	149.98	951.628	902.064	-131.86	953.906	883.228	15.7261	908.925	820.747	300.589	662.404	875.639	272.479	739.528	648.462	210.592	745.091	665.396	232.246	757.873	580.315	219.621	730.566	492.542	-278.338	672.699	874.439	-255.263	741.835	643.24	-193.349	747.32	660.928	-200.227	754.204	583.507	-185.213	731.105	499.846
105	1.04	7.95698	1086.19	781.651	75.6552	1081.88	831.66	-64.1137	1094.69	819.01	149.993	951.666	902.101	-131.842	953.911	883.234	15.7404	908.92	820.751	300.617	662.447	875.665	272.491	739.559	648.446	210.609	745.119	665.41	232.278	757.918	580.337	219.64	730.586	492.544	-278.325	672.691	874.43	-255.589	742.178	642.651	-193.313	747.337	660.917	-200.501	755.042	582.466	-185.129	731.633	498.995
106	1.05	7.86573	1086.24	781.593	75.5769	1081.92	831.663	-64.1849	1094.74	819.007	149.958	951.723	902.126	-131.907	953.946	883.29	15.68	908.957	820.689	300.584	662.517	875.711	272.449	739.611	648.443	210.598	745.105	665.433	232.241	757.987	580.279	219.607	730.607	492.568	-278.359	672.63	874.393	-255.174	741.749	643.526	-193.351	747.404	660.949	-200.097	753.942	583.961	-185.284	731.004	500.178
107	1.06	7.78622	1086.33	781.472	75.4497	1082.01	831.515	-64.2781	1094.78	818.949	149.915	951.78	902.132	-131.974	953.988	883.316	15.5777	909.05	820.487	300.518	662.621	875.778	272.38	739.658	648.43	210.565	745.064	665.427	232.196	758.101	580.222	219.558	730.622	492.548	-278.401	672.531	874.32	-255.145	741.695	643.76	-193.431	747.503	661.004	-200.01	753.641	584.351	-185.388	730.898	500.474
108	1.07	7.71117	1086.38	781.286	75.326	1082.14	831.284	-64.34	1094.78	818.886	149.895	951.812	902.123	-132.009	954.009	883.295	15.4889	909.16	820.272	300.466	662.714	875.844	272.341	739.684	648.425	210.549	745.033	665.416	232.142	758.222	580.195	219.535	730.637	492.541	-278.402	672.456	874.278	-255.202	741.74	643.76	-193.524	747.681	661.189	-200.008	753.518	584.463	-185.453	730.902	500.536
109	1.08	7.67517	1086.4	781.184	75.271	1082.19	831.197	-64.382	1094.77	818.859	149.88	951.804	902.099	-132.025	954.014	883.315	15.4381	909.223	820.129	300.45	662.714	875.819	272.341	739.686	648.432	210.582	745.028	665.487	232.095	758.278	580.18	219.537	730.636	492.55	-278.383	672.402	874.233	-255.236	741.776	643.751	-193.581	747.838	661.366	-200.014	753.488	584.501	-185.476	730.906	500.555
110	1.09	7.69796	1086.36	781.12	75.3502	1082.15	831.158	-64.3524	1094.74	818.806	149.893	951.751	902.09	-131.994	953.961	883.277	15.4607	909.146	820.112	300.467	662.636	875.77	272.388	739.671	648.423	210.639	745.045	665.537	232.12	758.223	580.183	219.571	730.633	492.574	-278.347	672.394	874.25	-255.192	741.718	643.759	-193.481	747.611	661.045	-199.994	753.494	584.47	-185.452	730.875	500.579
111	1.1	7.81569	1086.21	781.195	75.5389	1081.96	831.292	-64.2694	1094.64	818.796	149.918	951.64	902.072	-131.917	953.856	883.223	15.6086	908.931	820.307	300.532	662.492	875.712	272.46	739.602	648.44	210.671	745.046	665.508	232.181	758.042	580.224	219.613	730.592	492.573	-278.303	672.425	874.31	-255.085	741.59	643.755	-193.388	747.434	660.921	-199.966	753.491	584.397	-185.381	730.781	500.597
112	1.11	7.94161	1085.95	781.464	75.6477	1081.74	831.524	-64.1963	1094.49	818.814	149.96	951.538	902.045	-131.868	953.749	883.245	15.706	908.713	820.548	300.592	662.356	875.666	272.521	739.517	648.532	210.651	745.053	665.457	232.252	757.867	580.299	219.625	730.553	492.583	-278.273	672.468	874.385	-255.304	741.789	643.315	-193.347	747.296	660.951	-200.218	754.156	583.544	-185.26	731.064	499.958
113	1.12	7.96522	1085.81	781.578	75.6628	1081.61	831.718	-64.1726	1094.37	818.862	149.976	951.491	902.036	-131.879	953.711	883.267	15.6967	908.6	820.664	300.624	662.31	875.664	272.524	739.472	648.532	210.599	745.084	665.437	232.276	757.8	580.339	219.609	730.544	492.616	-278.261	672.494	874.431	-255.911	742.377	642.274	-193.359	747.26	661.032	-200.821	755.656	581.666	-185.142	731.91	498.422
114	1.13	7.94054	1085.79	781.49	75.6225	1081.56	831.744	-64.1768	1094.36	818.76	149.961	951.511	902.043	-131.913	953.733	883.229	15.6654	908.574	820.575	300.604	662.344	875.666	272.464	739.505	648.469	210.557	745.089	665.384	232.234	757.84	580.305	219.574	730.545	492.573	-278.274	672.501	874.417	-255.797	742.272	642.482	-193.373	747.311	661.037	-200.736	755.394	582.065	-185.183	731.778	498.694
115	1.14	7.88297	1085.86	781.263	75.5654	1081.6	831.628	-64.2162	1094.44	818.643	149.935	951.583	902.054	-131.958	953.777	883.211	15.6012	908.554	820.471	300.555	662.427	875.692	272.41	739.558	648.434	210.535	745.057	665.325	232.176	757.923	580.263	219.54	730.566	492.548	-278.308	672.461	874.371	-255.262	741.748	643.475	-193.39	747.393	660.964	-200.203	754.002	583.851	-185.334	731.047	500.094
116	1.15	7.76988	1086	780.953	75.4881	1081.71	831.366	-64.2959	1094.53	818.527	149.908	951.641	902.038	-131.993	953.827	883.231	15.4979	908.641	820.187	300.508	662.51	875.743	272.344	739.6	648.382	210.52	745.015	665.331	232.084	758.058	580.204	219.506	730.588	492.544	-278.316	672.406	874.361	-255.193	741.666	643.731	-193.452	747.589	661.11	-200.056	753.626	584.317	-185.426	730.928	500.432
117	1.16	7.70964	1086.1	780.644	75.409	1081.88	831.011	-64.329	1094.56	818.356	149.88	951.644	902.021	-132.015	953.856	883.23	15.426	908.74	819.854	300.447	662.542	875.766	272.3	739.627	648.348	210.528	744.979	665.366	232.008	758.207	580.154	219.496	730.602	492.539	-278.298	672.328	874.317	-255.221	741.715	643.728	-193.563	747.791	661.358	-200.023	753.524	584.386	-185.48	730.917	500.484
118	1.17	7.72188	1086.12	780.482	75.4043	1081.94	830.858	-64.3217	1094.56	818.303	149.873	951.62	902.029	-132.012	953.861	883.242	15.4426	908.703	819.78	300.422	662.526	875.778	272.318	739.632	648.366	210.556	744.979	665.42	232.011	758.263	580.203	219.503	730.61	492.553	-278.26	672.284	874.268	-255.237	741.761	643.697	-193.561	747.635	661.12	-200.033	753.525	584.412	-185.503	730.914	500.524
119	1.18	7.80748	1086.05	780.588	75.5052	1081.85	831.052	-64.2874	1094.54	818.288	149.896	951.583	902.049	-131.962	953.827	883.209	15.5226	908.584	819.884	300.452	662.466	875.776	272.377	739.627	648.469	210.603	745.016	665.538	232.072	758.191	580.226	219.562	730.625	492.601	-278.207	672.297	874.276	-255.188	741.719	643.762	-193.549	747.54	661.136	-200.039	753.554	584.494	-185.485	730.906	500.588
120	1.19	7.95925	1085.83	780.914	75.6725	1081.66	831.331	-64.1928	1094.43	818.292	149.968	951.496	902.034	-131.867	953.734	883.164	15.6538	908.414	820.053	300.523	662.364	875.725	272.465	739.586	648.537	210.674	745.038	665.61	232.215	758.047	580.287	219.649	730.635	492.648	-278.156	672.328	874.343	-255.092	741.626	643.833	-193.455	747.416	661.079	-200.018	753.552	584.555	-185.41	730.838	500.633
121	1.2	8.11991	1085.59	781.173	75.9623	1081.63	830.648	-64.0463	1094.24	818.336	150.053	951.364	901.962	-131.764	953.633	883.138	15.8206	908.211	820.167	300.61	662.23	875.658	272.588	739.493	648.603	210.715	745.04	665.588	232.331	757.915	580.361	219.703	730.575	492.688	-278.141	672.373	874.412	-255.276	741.808	643.383	-193.317	747.287	660.988	-200.218	754.181	583.651	-185.253	731.094	499.966
122	1.21	8.17449	1085.47	781.18	76.3603	1081.88	828.833	-63.9869	1094.15	818.309	150.105	951.287	901.916	-131.722	953.585	883.115	15.8562	908.035	820.204	300.662	662.164	875.625	272.619	739.451	648.586	210.7	745.037	665.524	232.368	757.864	580.408	219.712	730.547	492.686	-278.172	672.376	874.43	-255.881	742.359	642.291	-193.236	747.224	660.915	-200.764	755.66	581.671	-185.091	731.903	498.41
123	1.22	8.07422	1085.48	781.019	76.408	1081.97	828.312	-64.0381	1094.17	818.236	150.087	951.335	901.923	-131.765	953.603	883.096	15.8024	907.949	820.197	300.651	662.221	875.646	272.555	739.489	648.516	210.629	745.051	665.466	232.297	757.888	580.337	219.635	730.573	492.607	-278.228	672.383	874.472	-255.776	742.236	642.513	-193.262	747.273	660.897	-200.69	755.389	582.063	-185.163	731.77	498.712
124	1.23	7.96704	1085.59	780.802	76.3383	1082.05	828.094	-64.1411	1094.27	818.143	150.033	951.428	901.911	-131.831	953.676	883.091	15.6998	907.951	820.045	300.615	662.343	875.702	272.46	739.561	648.443	210.554	745.041	665.357	232.206	757.981	580.285	219.545	730.612	492.558	-278.259	672.382	874.441	-255.236	741.713	643.514	-193.365	747.492	661.081	-200.173	754.003	583.897	-185.354	731.045	500.119
125	1.24	7.88682	1085.75	780.569	76.2289	1082.12	827.92	-64.2254	1094.37	818.044	149.997	951.469	901.871	-131.868	953.748	883.08	15.6446	907.979	819.841	300.565	662.44	875.755	272.368	739.609	648.355	210.539	745.024	665.338	232.165	758.104	580.26	219.494	730.624	492.508	-278.281	672.363	874.391	-255.166	741.666	643.719	-193.518	747.825	661.493	-200.068	753.648	584.347	-185.446	730.943	500.442
126	1.25	7.80748	1085.89	780.288	76.1538	1082.2	827.761	-64.2651	1094.42	817.93	149.982	951.483	901.851	-131.865	953.781	883.073	15.6264	908.004	819.707	300.531	662.479	875.778	272.34	739.639	648.343	210.547	745.005	665.379	232.124	758.19	580.211	219.479	730.643	492.507	-278.27	672.352	874.384	-255.188	741.717	643.739	-193.585	747.933	661.595	-200.061	753.558	584.457	-185.495	730.944	500.486
127	1.26	7.77753	1085.96	780.069	76.1714	1082.26	827.665	-64.2533	1094.43	817.833	149.984	951.466	901.874	-131.836	953.767	883.089	15.6488	908.037	819.501	300.535	662.466	875.812	272.363	739.643	648.38	210.588	745.008	665.464	232.104	758.196	580.25	219.517	730.654	492.568	-278.212	672.349	874.414	-255.183	741.743	643.758	-193.591	747.853	661.514	-200.05	753.559	584.486	-185.491	730.933	500.535
128	1.27	7.8448	1085.95	780.009	76.2566	1082.26	827.643	-64.1934	1094.43	817.807	150.017	951.397	901.881	-131.765	953.707	883.054	15.7148	907.999	819.38	300.577	662.387	875.825	272.424	739.622	648.455	210.64	745.016	665.534	232.119	758.144	580.28	219.575	730.66	492.581	-278.104	672.351	874.457	-255.137	741.701	643.781	-193.519	747.561	661.204	-200.024	753.579	584.452	-185.457	730.913	500.582
129	1.28	7.94701	1085.86	780.171	76.3589	1082.2	827.703	-64.141	1094.35	817.848	150.069	951.302	901.83	-131.689	953.621	883.011	15.7598	907.895	819.356	300.635	662.25	875.744	272.49	739.59	648.506	210.684	745.019	665.559	232.152	758.055	580.294	219.628	730.666	492.564	-278.049	672.36	874.518	-255.084	741.623	643.81	-193.451	747.403	661.088	-200.017	753.58	584.47	-185.418	730.869	500.61
130	1.29	8.01344	1085.68	780.395	76.4589	1082.11	827.752	-64.0733	1094.23	817.888	150.132	951.204	901.768	-131.637	953.513	882.953	15.8162	907.736	819.486	300.688	662.156	875.68	272.545	739.505	648.536	210.694	745.011	665.555	232.206	757.931	580.334	219.663	730.61	492.618	-278.048	672.319	874.49	-255.301	741.792	643.357	-193.382	747.289	660.987	-200.267	754.207	583.623	-185.33	731.17	499.942
131	1.3	8.06823	1085.49	780.593	76.47	1082.01	827.763	-64.0365	1094.12	817.93	150.167	951.139	901.719	-131.616	953.424	882.952	15.852	907.532	819.677	300.727	662.116	875.685	272.553	739.42	648.548	210.65	744.972	665.478	232.258	757.865	580.333	219.639	730.538	492.633	-278.068	672.239	874.42	-255.897	742.288	642.288	-193.317	747.222	660.955	-200.83	755.633	581.686	-185.203	731.966	498.422
132	1.31	8.04822	1085.43	780.642	76.4313	1081.96	827.771	-64.0617	1094.08	817.951	150.151	951.14	901.713	-131.649	953.383	882.988	15.819	907.397	819.777	300.709	662.124	875.711	272.492	739.39	648.538	210.566	744.922	665.38	232.256	757.857	580.334	219.569	730.501	492.587	-278.098	672.158	874.383	-255.81	742.135	642.527	-193.367	747.346	661.212	-200.76	755.296	582.111	-185.248	731.751	498.748
133	1.32	7.98885	1085.51	780.566	76.3717	1081.99	827.759	-64.1478	1094.17	817.912	150.097	951.204	901.744	-131.71	953.405	882.993	15.7209	907.378	819.648	300.651	662.195	875.742	272.398	739.442	648.468	210.519	744.932	665.366	232.197	757.928	580.297	219.494	730.525	492.553	-278.126	672.121	874.395	-255.282	741.619	643.552	-193.477	747.553	661.476	-200.284	753.895	583.949	-185.398	730.98	500.187
134	1.33	7.96872	1085.72	780.385	76.3598	1082.12	827.656	-64.1658	1094.33	817.806	150.074	951.302	901.756	-131.726	953.479	882.981	15.6814	907.467	819.407	300.627	662.292	875.778	272.362	739.544	648.423	210.522	744.971	665.366	232.176	758.062	580.291	219.477	730.602	492.569	-278.104	672.15	874.411	-255.159	741.597	643.785	-193.43	747.479	661.137	-200.127	753.61	584.377	-185.45	730.893	500.514
135	1.34	7.99442	1085.95	780.072	76.4024	1082.26	827.537	-64.1079	1094.48	817.656	150.078	951.352	901.751	-131.701	953.558	882.923	15.7187	907.606	819.111	300.622	662.388	875.845	272.394	739.633	648.422	210.57	745.014	665.399	232.161	758.149	580.291	219.515	730.677	492.586	-278.043	672.232	874.463	-255.106	741.69	643.78	-193.391	747.512	661.005	-200.022	753.609	584.451	-185.438	730.938	500.537
136	1.35	8.06182	1086.14	779.791	76.4647	1082.38	827.477	-64.037	1094.57	817.539	150.101	951.372	901.747	-131.65	953.59	882.852	15.7866	907.701	818.913	300.626	662.389	875.841	272.456	739.674	648.409	210.658	745.058	665.497	232.164	758.188	580.31	219.577	730.732	492.603	-277.973	672.295	874.526	-255.062	741.736	643.762	-193.361	747.528	660.947	-199.947	753.665	584.457	-185.406	730.987	500.534
137	1.36	8.16984	1086.17	779.822	76.544	1082.4	827.52	-63.9837	1094.6	817.513	150.131	951.335	901.765	-131.587	953.558	882.865	15.833	907.7	818.877	300.632	662.319	875.808	272.509	739.669	648.47	210.753	745.065	665.621	232.187	758.174	580.336	219.637	730.745	492.668	-277.92	672.303	874.595	-255.023	741.718	643.769	-193.34	747.49	660.94	-199.912	753.679	584.458	-185.38	730.98	500.535
138	1.37	8.26029	1086.02	780.071	76.6003	1082.34	827.597	-63.9399	1094.51	817.584	150.154	951.247	901.779	-131.552	953.446	882.862	15.8728	907.574	818.994	300.652	662.214	875.785	272.542	739.596	648.557	210.763	745.019	665.646	232.247	758.092	580.395	219.658	730.712	492.706	-277.899	672.23	874.591	-254.995	741.632	643.829	-193.339	747.403	660.985	-199.934	753.628	584.452	-185.367	730.91	500.568
139	1.38	8.28458	1085.77	780.374	76.6073	1082.21	827.694	-63.9154	1094.35	817.715	150.187	951.141	901.765	-131.556	953.335	882.85	15.8895	907.345	819.238	300.683	662.114	875.737	272.547	739.493	648.596	210.725	744.97	665.64	232.292	757.992	580.423	219.653	730.648	492.669	-277.921	672.13	874.537	-255.01	741.521	643.886	-193.357	747.319	661.034	-200.011	753.557	584.5	-185.377	730.806	500.629
140	1.39	8.30197	1085.56	780.721	76.5882	1082.08	827.76	-63.9066	1094.23	817.86	150.216	951.067	901.764	-131.581	953.26	882.871	15.8765	907.12	819.412	300.705	662.059	875.698	272.551	739.397	648.619	210.659	744.932	665.561	232.295	757.901	580.435	219.628	730.564	492.711	-277.956	672.057	874.496	-255.036	741.441	643.943	-193.38	747.385	661.24	-200.064	753.492	584.553	-185.381	730.687	500.68
141	1.4	8.30036	1085.49	780.814	76.5808	1082.04	827.772	-63.8974	1094.17	817.909	150.216	951.049	901.768	-131.586	953.223	882.885	15.839	906.97	819.524	300.717	662.05	875.691	272.522	739.363	648.563	210.586	744.897	665.427	232.284	757.875	580.431	219.577	730.511	492.715	-277.984	672.004	874.437	-255.048	741.382	643.959	-193.416	747.61	661.622	-200.094	753.416	584.558	-185.387	730.64	500.681
142	1.41	8.27404	1085.6	780.638	76.5693	1082.08	827.715	-63.9264	1094.24	817.823	150.189	951.069	901.764	-131.6	953.24	882.867	15.8048	906.969	819.474	300.696	662.088	875.72	272.45	739.408	648.469	210.534	744.888	665.314	232.215	757.926	580.366	219.522	730.531	492.609	-277.99	671.98	874.384	-255.06	741.389	643.927	-193.457	747.694	661.684	-200.097	753.393	584.507	-185.409	730.69	500.65
143	1.42	8.2063	1085.83	780.349	76.5493	1082.21	827.633	-63.9605	1094.41	817.722	150.154	951.13	901.787	-131.635	953.323	882.878	15.784	907.114	819.244	300.638	662.144	875.761	272.387	739.504	648.391	210.539	744.928	665.342	232.152	758.01	580.323	219.491	730.6	492.591	-277.97	672.037	874.433	-255.09	741.482	643.884	-193.487	747.677	661.512	-200.082	753.468	584.491	-185.444	730.788	500.632
144	1.43	8.19946	1086.08	780.115	76.5404	1082.36	827.56	-63.9552	1094.55	817.638	150.135	951.191	901.84	-131.63	953.4	882.876	15.77	907.289	819.001	300.615	662.23	875.845	272.383	739.595	648.41	210.562	744.998	665.41	232.125	758.074	580.319	219.504	730.666	492.622	-277.926	672.136	874.537	-255.104	741.608	643.892	-193.46	747.511	661.202	-200.064	753.571	584.495	-185.455	730.879	500.616
145	1.44	8.21807	1086.25	779.978	76.5435	1082.46	827.48	-63.922	1094.65	817.618	150.125	951.223	901.857	-131.599	953.462	882.867	15.8014	907.388	818.851	300.596	662.29	875.898	272.416	739.645	648.449	210.603	745.043	665.435	232.132	758.108	580.331	219.533	730.713	492.652	-277.866	672.218	874.592	-255.091	741.711	643.876	-193.444	747.486	661.12	-200.028	753.645	584.502	-185.438	730.953	500.59
146	1.45	8.25836	1086.29	779.945	76.595	1082.49	827.534	-63.887	1094.7	817.633	150.161	951.226	901.877	-131.563	953.468	882.84	15.8508	907.42	818.735	300.605	662.259	875.871	272.455	739.65	648.456	210.664	745.054	665.503	232.149	758.149	580.324	219.579	730.725	492.679	-277.832	672.239	874.639	-255.077	741.745	643.818	-193.408	747.476	661.022	-199.994	753.662	584.515	-185.418	730.99	500.59
147	1.46	8.37854	1086.18	780.176	76.687	1082.42	827.622	-63.8337	1094.64	817.71	150.214	951.158	901.878	-131.509	953.381	882.858	15.909	907.302	818.829	300.655	662.165	875.809	272.508	739.59	648.496	210.718	745.008	665.571	232.199	758.134	580.33	219.617	730.679	492.697	-277.811	672.153	874.591	-255.034	741.657	643.862	-193.338	747.427	660.999	-199.977	753.639	584.51	-185.388	730.943	500.604
148	1.47	8.44136	1085.93	780.472	76.7451	1082.27	827.725	-63.7937	1094.46	817.846	150.278	951.04	901.866	-131.46	953.242	882.908	15.9416	907.04	819.093	300.699	662.051	875.765	272.561	739.467	648.567	210.708	744.924	665.577	232.255	758.027	580.375	219.626	730.595	492.726	-277.839	672.025	874.529	-255.001	741.51	643.909	-193.27	747.317	660.977	-199.998	753.535	584.479	-185.367	730.813	500.624
149	1.48	8.45289	1085.69	780.782	76.7442	1082.16	827.798	-63.7912	1094.31	817.987	150.331	950.938	901.841	-131.44	953.131	882.964	15.9626	906.801	819.414	300.723	661.953	875.731	272.573	739.346	648.627	210.659	744.847	665.529	232.302	757.931	580.429	219.634	730.528	492.732	-277.889	671.914	874.467	-255.005	741.381	643.938	-193.288	747.355	661.155	-200.049	753.421	584.518	-185.363	730.683	500.666
150	1.49	8.46931	1085.61	780.991	76.743	1082.12	827.843	-63.7957	1094.27	818.074	150.332	950.922	901.822	-131.451	953.102	882.989	15.9693	906.676	819.564	300.72	661.92	875.704	272.561	739.322	648.631	210.64	744.867	665.516	232.337	757.9	580.433	219.631	730.511	492.717	-277.9	671.88	874.407	-255.018	741.343	643.973	-193.345	747.472	661.44	-200.083	753.384	584.527	-185.376	730.637	500.711
151	1.5	8.47557	1085.66	780.954	76.743	1082.17	827.829	-63.7763	1094.3	818.071	150.332	950.939	901.816	-131.475	953.143	882.965	15.9736	906.712	819.488	300.697	661.966	875.7	272.545	739.376	648.581	210.623	744.931	665.486	232.352	757.911	580.412	219.608	730.534	492.736	-277.887	671.934	874.405	-255.018	741.375	643.993	-193.3	747.308	661.149	-200.061	753.414	584.554	-185.39	730.66	500.686
152	1.51	8.48927	1085.88	780.678	76.7493	1082.29	827.748	-63.7669	1094.43	817.954	150.305	951.01	901.836	-131.466	953.213	882.987	15.9755	906.877	819.27	300.667	662.058	875.737	272.52	739.49	648.508	210.637	744.988	665.462	232.319	757.987	580.401	219.601	730.638	492.689	-277.857	672.043	874.485	-255.026	741.476	643.943	-193.298	747.326	661.06	-200.008	753.494	584.55	-185.402	730.776	500.635
153	1.52	8.50592	1086.15	780.393	76.7701	1082.44	827.661	-63.7364	1094.62	817.833	150.262	951.1	901.895	-131.456	953.307	882.986	15.9852	907.085	818.976	300.632	662.16	875.802	272.515	739.618	648.463	210.663	745.036	665.447	232.263	758.1	580.408	219.606	730.742	492.655	-277.813	672.164	874.615	-255.027	741.616	643.869	-193.315	747.416	661.006	-199.966	753.615	584.468	-185.399	730.902	500.557
154	1.53	8.54307	1086.36	780.117	76.6055	1082.5	828.239	-63.6995	1094.77	817.829	150.25	951.176	901.933	-131.455	953.406	883.018	15.9892	907.21	818.755	300.616	662.25	875.872	272.513	739.699	648.451	210.689	745.07	665.482	232.217	758.212	580.428	219.614	730.796	492.632	-277.754	672.225	874.677	-255.035	741.735	643.849	-193.322	747.482	660.969	-199.924	753.679	584.446	-185.41	730.986	500.534
155	1.54	8.56279	1086.43	780.036	76.3882	1082.45	829.015	-63.6856	1094.81	817.834	150.259	951.196	901.963	-131.446	953.43	883.053	15.9804	907.21	818.696	300.621	662.295	875.905	272.514	739.703	648.482	210.706	745.063	665.54	232.179	758.268	580.397	219.602	730.792	492.637	-277.72	672.211	874.667	-255.043	741.77	643.824	-193.33	747.525	660.961	-199.932	753.683	584.468	-185.442	731.014	500.537
156	1.55	8.57567	1086.32	780.259	76.6754	1082.52	827.953	-63.6683	1094.75	817.879	150.291	951.146	901.978	-131.434	953.352	883.086	15.9558	907.076	818.837	300.655	662.245	875.897	272.503	739.626	648.511	210.702	745.01	665.578	232.189	758.195	580.344	219.589	730.723	492.675	-277.732	672.105	874.611	-255.054	741.689	643.839	-193.363	747.605	661.145	-199.983	753.629	584.517	-185.454	730.972	500.567
157	1.56	8.60052	1086.07	780.658	76.7703	1082.36	827.847	-63.6541	1094.61	818.006	150.327	951.031	901.961	-131.417	953.201	883.105	15.9389	906.825	819.183	300.711	662.119	875.852	272.504	739.499	648.561	210.671	744.918	665.551	232.211	758.079	580.378	219.589	730.612	492.702	-277.749	671.99	874.567	-255.037	741.527	643.915	-193.448	747.753	661.594	-200.064	753.504	584.516	-185.445	730.855	500.61
158	1.57	8.65685	1085.81	781.076	76.8188	1082.22	827.893	-63.6206	1094.43	818.162	150.373	950.882	901.947	-131.402	953.084	883.137	15.937	906.573	819.528	300.765	662.003	875.826	272.516	739.352	648.609	210.63	744.842	665.507	232.263	757.959	580.418	219.599	730.527	492.698	-277.753	671.889	874.522	-255.045	741.379	643.972	-193.45	747.686	661.752	-200.108	753.409	584.531	-185.44	730.712	500.691
159	1.58	8.74653	1085.67	781.32	76.8722	1082.19	827.911	-63.5854	1094.34	818.242	150.393	950.799	901.932	-131.396	953.021	883.156	15.9775	906.407	819.75	300.798	661.934	875.802	272.534	739.286	648.633	210.615	744.833	665.494	232.294	757.867	580.425	219.597	730.509	492.693	-277.763	671.846	874.517	-255.053	741.309	643.986	-193.441	747.644	661.762	-200.133	753.392	584.523	-185.419	730.62	500.733
160	1.59	8.86442	1085.74	781.247	76.9289	1082.23	827.921	-63.5431	1094.37	818.18	150.38	950.785	901.927	-131.384	953.031	883.114	16.0195	906.446	819.656	300.801	661.934	875.779	272.566	739.326	648.608	210.623	744.902	665.49	232.299	757.858	580.444	219.613	730.541	492.716	-277.761	671.897	874.552	-255.039	741.349	644.001	-193.404	747.549	661.604	-200.11	753.436	584.54	-185.388	730.635	500.706
161	1.6	8.93733	1085.95	780.991	76.9943	1082.32	827.901	-63.4846	1094.51	818.12	150.362	950.853	901.921	-131.365	953.107	883.084	16.0548	906.634	819.405	300.791	662.023	875.771	272.581	739.45	648.534	210.658	744.994	665.465	232.293	757.914	580.505	219.622	730.618	492.719	-277.734	672.062	874.667	-254.988	741.434	643.951	-193.337	747.339	661.228	-200.06	753.519	584.515	-185.384	730.732	500.655
162	1.61	8.93301	1086.23	780.584	77.0023	1082.44	827.814	-63.4677	1094.68	818.076	150.343	950.955	901.946	-131.374	953.206	883.065	16.0423	906.882	819.095	300.778	662.151	875.815	272.569	739.595	648.483	210.678	745.059	665.451	232.267	758.018	580.513	219.623	730.706	492.718	-277.718	672.189	874.737	-254.988	741.547	643.94	-193.318	747.347	661.071	-200.015	753.596	584.536	-185.401	730.87	500.624
163	1.62	8.90731	1086.45	780.357	76.9781	1082.54	827.768	-63.4752	1094.82	818.017	150.309	951.028	901.971	-131.402	953.284	883.057	16.003	907.017	818.872	300.774	662.252	875.891	272.527	739.671	648.447	210.696	745.077	665.493	232.212	758.128	580.443	219.603	730.752	492.704	-277.722	672.201	874.72	-255.028	741.646	643.908	-193.334	747.422	661.021	-199.985	753.639	584.552	-185.424	730.96	500.602
164	1.63	8.90259	1086.48	780.381	76.9773	1082.57	827.779	-63.4667	1094.87	818.038	150.296	951.058	902.001	-131.412	953.302	883.063	15.9728	906.999	818.86	300.786	662.317	875.941	272.506	739.653	648.472	210.714	745.046	665.544	232.202	758.226	580.437	219.595	730.738	492.715	-277.73	672.128	874.634	-255.063	741.681	643.886	-193.365	747.479	661.066	-199.989	753.614	584.547	-185.455	730.969	500.591
165	1.64	8.89399	1086.4	780.541	76.9727	1082.5	827.831	-63.475	1094.83	818.096	150.33	951.061	902.019	-131.395	953.259	883.057	15.9716	906.851	818.984	300.838	662.333	875.943	272.52	739.605	648.54	210.717	744.975	665.573	232.225	758.221	580.464	219.588	730.668	492.749	-277.729	672.031	874.549	-255.098	741.646	643.903	-193.404	747.591	661.256	-200.018	753.552	584.571	-185.476	730.94	500.617
166	1.65	8.90684	1086.25	780.707	76.9894	1082.42	827.862	-63.4792	1094.75	818.168	150.39	951.015	901.988	-131.354	953.187	883.028	15.9755	906.69	819.164	300.919	662.305	875.917	272.536	739.544	648.546	210.724	744.919	665.596	232.252	758.149	580.45	219.602	730.619	492.75	-277.732	671.966	874.512	-255.073	741.569	643.938	-193.439	747.772	661.599	-200.034	753.507	584.627	-185.469	730.902	500.65
167	1.66	8.99182	1086.08	780.863	77.0485	1082.33	827.899	-63.4175	1094.63	818.183	150.458	950.905	901.929	-131.293	953.114	883.002	16.0445	906.519	819.369	301.008	662.24	875.882	272.587	739.465	648.554	210.746	744.893	665.589	232.294	758.056	580.463	219.644	730.591	492.718	-277.736	671.927	874.482	-255.018	741.466	643.944	-193.357	747.626	661.506	-200.004	753.473	584.599	-185.418	730.813	500.628
168	1.67	9.10896	1085.9	781.108	77.0872	1082.27	827.915	-63.3612	1094.5	818.193	150.497	950.801	901.902	-131.242	953.067	883.015	16.1426	906.358	819.616	301.078	662.154	875.844	272.659	739.396	648.592	210.766	744.914	665.577	232.335	757.947	580.525	219.692	730.565	492.761	-277.736	671.948	874.526	-254.972	741.399	643.94	-193.217	747.311	661.109	-200.002	753.461	584.544	-185.363	730.707	500.68
169	1.68	9.13889	1085.88	781.228	77.1095	1082.29	827.92	-63.3429	1094.48	818.179	150.487	950.772	901.89	-131.239	953.068	883.07	16.1935	906.341	819.755	301.092	662.129	875.86	272.683	739.403	648.6	210.753	744.959	665.582	232.348	757.885	580.512	219.681	730.579	492.789	-277.744	672	874.597	-254.954	741.401	643.973	-193.213	747.215	661.004	-200.025	753.501	584.525	-185.36	730.68	500.73
170	1.69	9.11239	1085.98	781.068	77.1093	1082.37	827.846	-63.3526	1094.53	818.079	150.462	950.798	901.897	-131.252	953.121	883.067	16.1998	906.448	819.599	301.057	662.161	875.866	272.66	739.478	648.553	210.741	745.037	665.586	232.306	757.921	580.459	219.653	730.638	492.76	-277.723	672.093	874.662	-254.965	741.457	643.961	-193.275	747.221	661.057	-200.022	753.566	584.535	-185.366	730.74	500.694
171	1.7	9.04904	1086.15	780.739	77.0723	1082.46	827.724	-63.373	1094.61	817.991	150.421	950.876	901.91	-131.258	953.167	883.012	16.1581	906.568	819.307	301.042	662.225	875.876	272.619	739.571	648.483	210.727	745.099	665.549	232.267	757.996	580.471	219.622	730.703	492.733	-277.706	672.171	874.697	-254.972	741.519	643.941	-193.317	747.278	661.094	-200.016	753.613	584.529	-185.4	730.83	500.655
172	1.71	8.93681	1086.31	780.526	76.8585	1082.37	828.437	-63.4391	1094.71	817.969	150.383	950.948	901.901	-131.29	953.201	882.973	16.086	906.633	819.138	301.014	662.324	875.908	272.549	739.623	648.421	210.702	745.089	665.483	232.22	758.09	580.426	219.576	730.732	492.671	-277.739	672.181	874.689	-255.01	741.565	643.928	-193.32	747.347	661.062	-200.031	753.619	584.549	-185.441	730.899	500.64
173	1.72	8.85979	1086.36	780.432	76.5868	1082.24	829.349	-63.5316	1094.77	817.917	150.35	951.025	901.892	-131.324	953.225	882.93	15.998	906.65	819.022	300.994	662.412	875.94	272.488	739.634	648.396	210.681	745.05	665.497	232.16	758.179	580.389	219.531	730.723	492.653	-277.764	672.134	874.613	-255.071	741.616	643.891	-193.353	747.42	661.038	-200.058	753.574	584.576	-185.478	730.932	500.624
174	1.73	8.79587	1086.38	780.4	76.7733	1082.47	827.973	-63.5818	1094.77	817.87	150.352	951.057	901.923	-131.341	953.219	882.913	15.9524	906.614	819.006	300.988	662.44	875.976	272.464	739.604	648.419	210.668	744.991	665.506	232.128	758.229	580.347	219.517	730.681	492.671	-277.759	672.048	874.545	-255.105	741.629	643.877	-193.417	747.569	661.211	-200.076	753.532	584.579	-185.506	730.934	500.62
175	1.74	8.73501	1086.31	780.485	76.8189	1082.49	827.659	-63.582	1094.73	817.899	150.368	951.026	901.929	-131.345	953.18	882.95	15.9425	906.562	819.096	301.017	662.416	875.999	272.458	739.57	648.453	210.675	744.939	665.532	232.155	758.179	580.358	219.534	730.635	492.693	-277.746	671.993	874.555	-255.101	741.598	643.904	-193.456	747.685	661.434	-200.086	753.521	584.588	-185.515	730.916	500.628
176	1.75	8.76975	1086.21	780.618	76.8711	1082.42	827.685	-63.5617	1094.66	817.934	150.414	950.963	901.942	-131.302	953.127	882.977	15.9968	906.495	819.242	301.075	662.365	875.982	272.505	739.533	648.51	210.717	744.935	665.603	232.222	758.109	580.389	219.584	730.624	492.717	-277.738	671.978	874.584	-255.06	741.536	643.947	-193.376	747.458	661.138	-200.081	753.534	584.583	-185.495	730.885	500.652
177	1.76	8.87346	1086.08	780.708	76.9492	1082.36	827.724	-63.4976	1094.55	817.924	150.473	950.881	901.917	-131.226	953.066	882.932	16.1338	906.363	819.419	301.144	662.295	875.919	272.607	739.493	648.559	210.792	744.966	665.611	232.281	758.027	580.426	219.648	730.626	492.731	-277.707	672.003	874.609	-254.999	741.491	643.957	-193.288	747.328	661.018	-200.037	753.54	584.523	-185.434	730.819	500.649
178	1.77	9.00286	1085.97	780.851	77.034	1082.34	827.777	-63.4409	1094.45	817.898	150.508	950.83	901.913	-131.173	953.043	882.919	16.2778	906.258	819.536	301.202	662.236	875.864	272.704	739.458	648.598	210.843	745.011	665.626	232.344	757.957	580.498	219.691	730.604	492.771	-277.675	672.033	874.612	-255.187	741.712	643.459	-193.194	747.233	660.975	-200.235	754.228	583.637	-185.313	731.16	499.954
179	1.78	9.01867	1085.93	780.954	77.0656	1082.35	827.82	-63.4575	1094.41	817.929	150.505	950.823	901.922	-131.177	953.036	882.951	16.3165	906.215	819.672	301.219	662.223	875.848	272.727	739.465	648.614	210.834	745.067	665.664	232.37	757.917	580.54	219.714	730.609	492.818	-277.691	672.063	874.669	-255.511	742.027	642.9	-193.168	747.203	660.994	-200.55	755.056	582.614	-185.224	731.639	499.102
180	1.79	8.90013	1085.96	780.878	76.9997	1082.36	827.856	-63.5122	1094.41	817.942	150.474	950.85	901.94	-131.216	953.042	882.974	16.2489	906.265	819.673	301.187	662.285	875.895	272.68	739.501	648.58	210.78	745.098	665.645	232.348	757.937	580.553	219.685	730.627	492.813	-277.715	672.051	874.661	-255.087	741.599	643.753	-193.203	747.238	661.049	-200.16	753.969	584.121	-185.341	730.968	500.313
181	1.8	8.73967	1086.09	780.682	76.8965	1082.39	827.827	-63.6102	1094.48	817.895	150.424	950.924	901.96	-131.268	953.061	882.972	16.1585	906.363	819.562	301.141	662.381	875.937	272.591	739.555	648.49	210.718	745.092	665.561	232.301	758	580.515	219.627	730.646	492.765	-277.757	672.013	874.6	-255.028	741.525	643.94	-193.309	747.418	661.251	-200.083	753.686	584.483	-185.416	730.838	500.612
182	1.81	8.58019	1086.26	780.501	76.7753	1082.48	827.758	-63.7296	1094.59	817.85	150.351	951.042	901.997	-131.351	953.099	882.988	16.0395	906.516	819.306	301.091	662.499	875.95	272.503	739.609	648.439	210.687	745.06	665.528	232.231	758.124	580.458	219.567	730.664	492.733	-277.786	671.96	874.543	-255.075	741.578	643.955	-193.453	747.761	661.632	-200.069	753.603	584.577	-185.481	730.883	500.661
183	1.82	8.45382	1086.37	780.383	76.4919	1082.49	828.359	-63.8285	1094.66	817.822	150.306	951.118	901.98	-131.385	953.148	883	15.9352	906.646	819.041	301.073	662.595	875.953	272.457	739.638	648.416	210.705	745.048	665.557	232.144	758.234	580.361	219.545	730.665	492.723	-277.786	671.931	874.535	-255.122	741.651	643.914	-193.457	747.767	661.537	-200.037	753.581	584.589	-185.52	730.927	500.647
184	1.83	8.40285	1086.42	780.405	76.0852	1082.32	829.923	-63.8634	1094.69	817.828	150.3	951.121	901.982	-131.361	953.138	883.002	15.9297	906.679	818.959	301.101	662.625	875.953	272.491	739.646	648.436	210.739	745.04	665.595	232.126	758.224	580.337	219.573	730.65	492.751	-277.74	671.915	874.538	-255.107	741.67	643.856	-193.347	747.557	661.112	-200.008	753.575	584.51	-185.508	730.943	500.587
185	1.84	8.38875	1086.39	780.501	75.9898	1082.25	830.472	-63.8854	1094.68	817.87	150.314	951.085	902.027	-131.342	953.08	883.013	15.9708	906.651	819.071	301.152	662.593	875.923	272.547	739.632	648.5	210.774	745.032	665.618	232.178	758.122	580.418	219.615	730.639	492.755	-277.692	671.914	874.576	-255.056	741.622	643.856	-193.323	747.443	661.006	-200.016	753.584	584.463	-185.474	730.93	500.554
186	1.85	8.35932	1086.28	780.703	75.9546	1082.11	830.885	-63.896	1094.6	817.95	150.336	951.02	902.046	-131.354	953.002	883.047	16.0181	906.546	819.299	301.206	662.547	875.935	272.592	739.578	648.53	210.787	745.031	665.645	232.215	757.998	580.429	219.643	730.639	492.748	-277.673	671.925	874.64	-254.994	741.534	643.883	-193.318	747.336	661.002	-200.034	753.599	584.475	-185.434	730.862	500.588
187	1.86	8.32412	1086.17	780.944	75.9139	1082.02	831.146	-63.9186	1094.49	818.088	150.343	950.951	902.028	-131.364	952.934	883.074	16.0805	906.4	819.556	301.243	662.503	875.922	272.641	739.51	648.589	210.791	745.047	665.643	232.257	757.904	580.439	219.667	730.61	492.791	-277.659	671.902	874.634	-255.221	741.729	643.43	-193.3	747.259	661.048	-200.294	754.252	583.639	-185.333	731.171	499.898
188	1.87	8.28348	1086.13	781.137	75.853	1081.99	831.333	-63.9738	1094.45	818.178	150.313	950.961	902.028	-131.396	952.9	883.069	16.111	906.286	819.772	301.231	662.515	875.886	272.655	739.498	648.573	210.774	745.078	665.583	232.303	757.875	580.477	219.665	730.578	492.81	-277.672	671.855	874.569	-255.832	742.297	642.381	-193.287	747.223	661.069	-200.848	755.713	581.741	-185.196	731.995	498.393
189	1.88	8.1803	1086.18	781.234	75.7295	1082.01	831.445	-64.0947	1094.47	818.235	150.25	951.039	902.042	-131.471	952.894	883.071	16.0595	906.28	819.837	301.173	662.568	875.857	272.614	739.532	648.497	210.724	745.118	665.521	232.32	757.903	580.475	219.62	730.586	492.76	-277.712	671.772	874.473	-255.749	742.168	642.588	-193.299	747.237	661.051	-200.756	755.415	582.116	-185.244	731.81	498.74
190	1.89	8.00556	1086.34	781.205	75.5517	1082.15	831.439	-64.2851	1094.54	818.256	150.155	951.168	902.101	-131.566	952.89	883.108	15.9483	906.403	819.694	301.086	662.694	875.888	272.538	739.59	648.436	210.667	745.136	665.458	232.267	757.973	580.416	219.563	730.615	492.713	-277.776	671.679	874.416	-255.228	741.629	643.619	-193.365	747.409	661.221	-200.272	754.003	583.927	-185.414	731.042	500.184
191	1.9	7.83781	1086.48	781.16	75.3447	1082.4	831.28	-64.45	1094.63	818.291	150.059	951.285	902.155	-131.649	952.905	883.15	15.8487	906.576	819.473	301.006	662.862	875.942	272.475	739.67	648.392	210.633	745.127	665.418	232.204	758.074	580.414	219.536	730.651	492.687	-277.806	671.633	874.42	-255.145	741.556	643.844	-193.467	747.74	661.573	-200.136	753.655	584.392	-185.496	730.915	500.502
192	1.91	7.71722	1086.62	781.127	75.1461	1082.64	831.107	-64.5819	1094.69	818.341	149.998	951.387	902.236	-131.698	952.924	883.151	15.7818	906.73	819.279	300.976	663.032	876.012	272.462	739.74	648.387	210.656	745.13	665.469	232.156	758.177	580.371	219.544	730.673	492.674	-277.791	671.615	874.454	-255.156	741.596	643.858	-193.463	747.754	661.468	-200.084	753.586	584.484	-185.514	730.921	500.563
193	1.92	7.61031	1086.74	781.119	75.0102	1082.8	831.131	-64.7033	1094.73	818.37	149.963	951.456	902.293	-131.732	952.914	883.166	15.7386	906.835	819.204	301.001	663.133	876.049	272.485	739.761	648.398	210.722	745.139	665.537	232.158	758.222	580.326	219.573	730.668	492.682	-277.752	671.58	874.485	-255.14	741.637	643.856	-193.412	747.55	661.143	-200.065	753.6	584.527	-185.506	730.939	500.577
194	1.93	7.52827	1086.8	781.293	74.9268	1082.87	831.375	-64.8163	1094.74	818.478	149.943	951.499	902.379	-131.732	952.867	883.243	15.745	906.854	819.271	301.079	663.195	876.075	272.544	739.758	648.448	210.804	745.184	665.654	232.207	758.133	580.341	219.641	730.659	492.733	-277.675	671.521	874.48	-255.06	741.601	643.907	-193.376	747.462	661.081	-200.008	753.63	584.558	-185.462	730.943	500.58
195	1.94	7.44675	1086.84	781.503	74.8521	1082.87	831.634	-64.9516	1094.7	818.613	149.915	951.511	902.497	-131.73	952.776	883.243	15.7933	906.79	819.479	301.171	663.227	876.057	272.595	739.724	648.48	210.867	745.207	665.729	232.269	758.041	580.401	219.713	730.654	492.76	-277.605	671.438	874.44	-254.992	741.522	643.939	-193.336	747.38	661.049	-199.993	753.665	584.545	-185.408	730.893	500.593
196	1.95	7.31718	1086.85	781.657	74.8865	1082.98	831.134	-65.1307	1094.63	818.746	149.862	951.501	902.577	-131.785	952.687	883.226	15.7987	906.736	819.646	301.254	663.253	875.972	272.634	739.667	648.477	210.872	745.219	665.726	232.3	757.939	580.4	219.725	730.614	492.761	-277.606	671.373	874.482	-254.966	741.44	643.937	-193.305	747.291	661.028	-200.013	753.656	584.514	-185.374	730.819	500.597
197	1.96	7.15476	1086.86	781.899	75.0691	1083.22	829.734	-65.3273	1094.57	818.923	149.766	951.519	902.671	-131.883	952.618	883.316	15.7567	906.648	819.818	301.319	663.314	875.931	272.667	739.629	648.466	210.848	745.237	665.667	232.365	757.875	580.457	219.707	730.552	492.78	-277.658	671.312	874.541	-254.958	741.373	643.959	-193.262	747.215	660.994	-200.035	753.628	584.517	-185.366	730.734	500.619
198	1.97	6.94898	1086.87	782.193	74.9616	1083.34	829.44	-65.5778	1094.53	819.157	149.63	951.588	902.773	-132.012	952.568	883.387	15.6716	906.585	820.004	301.348	663.465	875.936	272.664	739.614	648.419	210.801	745.273	665.598	232.408	757.874	580.466	219.657	730.527	492.726	-277.721	671.215	874.485	-254.993	741.318	643.983	-193.316	747.323	661.19	-200.084	753.588	584.533	-185.382	730.696	500.63
199	1.98	6.66045	1086.91	782.272	74.7186	1083.48	829.345	-65.8589	1094.53	819.333	149.441	951.7	902.872	-132.173	952.536	883.406	15.541	906.633	819.934	301.232	664.004	876.322	272.787	739.831	648.217	210.754	745.304	665.491	232.266	758.201	580.18	219.556	730.825	492.144	-277.777	671.099	874.35	-255.049	741.299	643.975	-193.472	747.616	661.615	-200.119	753.551	584.535	-185.44	730.733	500.623
200	1.99	6.38823	1087.06	782.315	74.4624	1083.61	829.395	-66.1031	1094.59	819.507	149.263	951.814	902.969	-132.322	952.52	883.463	15.4078	906.74	819.818	301.038	665	877.24	273.126	740.305	647.914	210.752	745.351	665.447	232.016	758.92	579.71	219.401	731.542	490.938	-277.804	671.022	874.276	-255.113	741.342	643.948	-193.514	747.616	661.536	-200.158	753.534	584.565	-185.501	730.811	500.608
201	2	6.13259	1087.31	782.361	74.0994	1083.68	830.246	-66.3024	1094.68	819.682	149.118	951.95	903.086	-132.444	952.534	883.549	15.3036	906.908	819.726	301.062	665.44	877.444	273.228	740.488	647.838	210.803	745.412	665.452	231.947	759.15	579.562	219.343	731.782	490.576	-277.812	670.993	874.312	-255.154	741.438	643.931	-193.492	747.459	661.209	-200.159	753.59	584.565	-185.542	730.902	500.592
202	2.01	5.89673	1087.61	782.26	73.5771	1083.64	831.958	-66.4705	1094.78	819.779	149.005	952.045	903.165	-132.544	952.538	883.574	15.2234	907.062	819.569	301.165	665.716	877.42	273.275	740.55	647.761	210.89	745.463	665.493	231.974	759.24	579.513	219.37	731.884	490.45	-277.794	670.966	874.332	-255.172	741.528	643.852	-193.501	747.469	661.093	-200.109	753.651	584.507	-185.534	730.951	500.539
203	2.02	5.7199	1087.81	782.304	73.33	1083.75	832.433	-66.6089	1094.85	819.887	148.905	952.094	903.239	-132.612	952.486	883.573	15.1548	907.133	819.461	301.326	665.955	877.401	273.342	740.526	647.714	211.026	745.498	665.556	232.051	759.255	579.487	219.416	731.923	490.389	-277.784	670.917	874.304	-255.148	741.547	643.789	-193.501	747.456	661.037	-200.052	753.676	584.472	-185.498	730.958	500.5
204	2.03	5.5811	1087.86	782.662	73.1599	1083.73	832.964	-66.7495	1094.84	820.113	148.83	952.142	903.347	-132.666	952.403	883.63	15.1221	907.111	819.628	301.557	666.17	877.357	273.448	740.493	647.726	211.141	745.544	665.634	232.177	759.232	579.509	219.467	731.895	490.399	-277.814	670.876	874.3	-255.099	741.478	643.84	-193.463	747.402	661.023	-200.039	753.68	584.482	-185.458	730.949	500.511
205	2.04	5.40946	1087.82	783.059	72.9425	1083.68	833.505	-66.9684	1094.78	820.389	148.719	952.207	903.432	-132.764	952.302	883.705	15.0297	907.006	819.951	301.785	666.395	877.267	273.551	740.451	647.688	211.208	745.602	665.638	232.238	759.188	579.503	219.476	731.82	490.421	-277.663	670.695	873.899	-255.072	741.375	643.895	-193.482	747.463	661.201	-200.062	753.67	584.529	-185.438	730.891	500.55
206	2.05	5.20061	1087.78	783.411	72.7115	1083.66	833.945	-67.2267	1094.71	820.656	148.583	952.252	903.478	-132.893	952.198	883.729	14.9158	906.878	820.261	301.97	666.656	877.216	273.622	740.409	647.602	211.241	745.676	665.563	232.248	759.121	579.412	219.461	731.728	490.372	-277.288	670.381	873.02	-255.078	741.289	643.897	-193.514	747.538	661.43	-200.095	753.638	584.495	-185.418	730.792	500.552
207	2.06	5.02712	1087.78	783.826	72.643	1083.84	833.464	-67.4722	1094.69	820.918	148.445	952.325	903.595	-133.028	952.102	883.805	14.8105	906.804	820.529	302.142	666.974	877.24	273.686	740.397	647.551	211.263	745.741	665.462	232.288	759.094	579.381	219.479	731.671	490.383	-277.507	670.379	873.121	-255.099	741.237	643.883	-193.481	747.409	661.312	-200.114	753.588	584.497	-185.387	730.713	500.588
208	2.07	4.80045	1087.94	784.02	72.7347	1084.31	831.843	-67.7507	1094.72	821.233	148.285	952.44	903.696	-133.173	952.041	883.887	14.666	906.839	820.676	302.268	667.336	877.336	273.734	740.449	647.499	211.327	745.827	665.445	232.305	759.1	579.385	219.495	731.661	490.379	-278.085	670.54	873.802	-255.133	741.226	643.889	-193.559	747.639	661.665	-200.119	753.566	584.557	-185.4	730.723	500.632
209	2.08	4.48658	1088.19	784.047	72.5286	1084.61	831.431	-68.0587	1094.8	821.464	148.109	952.568	903.751	-133.343	952.015	883.944	14.4894	906.988	820.544	302.325	667.734	877.433	273.709	740.531	647.393	211.379	745.935	665.396	232.286	759.121	579.305	219.497	731.708	490.279	-278.313	670.548	873.922	-255.174	741.275	643.863	-193.594	747.61	661.54	-200.117	753.593	584.542	-185.454	730.785	500.64
210	2.09	4.17885	1088.42	784.12	72.2891	1084.89	831.312	-68.355	1094.97	821.603	147.914	952.733	903.83	-133.519	952.028	884.02	14.3269	907.159	820.502	302.375	668.159	877.606	273.68	740.62	647.341	211.415	746.044	665.324	232.313	759.191	579.237	219.509	731.776	490.21	-278.429	670.553	873.934	-255.2	741.343	643.8	-193.615	747.44	661.221	-200.111	753.639	584.518	-185.491	730.867	500.596
211	2.1	3.86412	1088.64	784.329	71.8816	1085	832.153	-68.6226	1095.14	821.766	147.733	952.912	903.919	-133.673	952.042	884.149	14.1402	907.304	820.549	302.454	668.625	877.813	273.655	740.719	647.345	211.451	746.148	665.355	232.356	759.272	579.213	219.525	731.839	490.215	-278.485	670.521	873.924	-255.227	741.422	643.804	-193.667	747.449	661.203	-200.091	753.707	584.526	-185.5	730.942	500.606
212	2.11	3.56352	1088.78	784.524	71.2496	1084.9	834.001	-68.8875	1095.25	821.928	147.583	953.038	903.952	-133.808	952	884.268	13.9837	907.38	820.624	302.555	669.007	877.893	273.654	740.768	647.341	211.483	746.216	665.374	232.359	759.288	579.166	219.522	731.84	490.159	-278.521	670.493	873.931	-255.25	741.449	643.796	-193.684	747.449	661.165	-200.089	753.73	584.557	-185.484	730.976	500.593
213	2.12	3.32241	1088.83	784.763	70.9109	1084.88	834.74	-69.1213	1095.25	822.117	147.453	953.117	903.976	-133.914	951.906	884.322	13.8955	907.342	820.682	302.675	669.287	877.862	273.656	740.762	647.295	211.503	746.229	665.328	232.367	759.248	579.113	219.562	731.788	490.124	-278.561	670.39	873.844	-255.247	741.412	643.758	-193.666	747.395	661.127	-200.069	753.698	584.505	-185.468	730.95	500.572
214	2.13	3.06979	1088.86	785.043	70.6405	1084.91	835.181	-69.4083	1095.21	822.446	147.339	953.191	904.061	-134.023	951.809	884.39	13.7995	907.264	820.894	302.795	669.544	877.782	273.646	740.782	647.277	211.476	746.236	665.297	232.393	759.202	579.166	219.582	731.716	490.101	-278.641	670.291	873.752	-255.222	741.335	643.768	-193.664	747.449	661.246	-200.073	753.68	584.485	-185.465	730.886	500.599
215	2.14	2.78233	1088.92	785.386	70.3438	1084.92	835.629	-69.7189	1095.18	822.799	147.185	953.266	904.121	-134.174	951.723	884.479	13.6616	907.216	821.065	302.899	669.781	877.637	273.612	740.842	647.262	211.396	746.276	665.244	232.353	759.17	579.162	219.522	731.669	490.049	-278.745	670.199	873.679	-255.24	741.279	643.819	-193.738	747.688	661.649	-200.119	753.656	584.542	-185.465	730.842	500.612
216	2.15	2.45816	1089.01	785.663	70.0499	1084.92	836.066	-70.0636	1095.18	823.091	146.996	953.383	904.182	-134.344	951.679	884.563	13.5306	907.159	821.243	302.997	670.04	877.513	273.542	740.908	647.195	211.287	746.348	665.121	232.274	759.153	579.064	219.477	731.625	489.994	-278.866	670.149	873.654	-255.266	741.231	643.809	-193.781	747.734	661.755	-200.167	753.638	584.533	-185.472	730.82	500.608
217	2.16	2.15169	1089.15	785.875	69.9525	1085.18	835.469	-70.357	1095.22	823.352	146.8	953.539	904.262	-134.477	951.662	884.623	13.4286	907.171	821.29	303.102	670.321	877.429	273.491	741.009	647.121	211.199	746.471	664.95	232.232	759.143	578.986	219.503	731.603	489.958	-278.973	670.09	873.556	-255.264	741.217	643.775	-193.798	747.749	661.785	-200.18	753.634	584.513	-185.466	730.8	500.57
218	2.17	1.83537	1089.38	786.018	70.0576	1085.7	833.777	-70.6387	1095.29	823.604	146.611	953.708	904.338	-134.607	951.675	884.734	13.3412	907.283	821.256	303.218	670.652	877.371	273.435	741.142	647.035	211.132	746.642	664.85	232.208	759.172	578.997	219.525	731.637	489.904	-279.088	670.05	873.535	-255.278	741.242	643.776	-193.776	747.658	661.652	-200.141	753.665	584.562	-185.469	730.83	500.607
219	2.18	1.46817	1089.66	786.091	69.88	1086	833.458	-70.8961	1095.34	823.887	146.42	953.883	904.419	-134.728	951.719	884.851	13.2467	907.446	821.196	303.329	671.037	877.37	273.383	741.293	646.951	211.088	746.824	664.807	232.198	759.256	578.934	219.57	731.694	489.82	-279.156	670.078	873.589	-255.296	741.292	643.815	-193.732	747.442	661.264	-200.106	753.703	584.579	-185.47	730.876	500.631
220	2.19	1.1307	1089.96	786.079	69.4645	1086.17	834.08	-71.1271	1095.4	824.103	146.247	954.064	904.488	-134.83	951.799	884.918	13.157	907.66	820.966	303.451	671.495	877.405	273.324	741.451	646.833	211.087	747.075	664.758	232.202	759.349	578.828	219.608	731.748	489.678	-279.199	670.124	873.64	-255.301	741.372	643.765	-193.746	747.428	661.177	-200.083	753.718	584.566	-185.465	730.948	500.606
221	2.2	0.85965	1090.17	786.127	68.8377	1086.13	835.712	-71.3456	1095.43	824.29	146.1	954.254	904.576	-134.91	951.871	884.946	13.0683	907.795	820.87	303.619	671.96	877.352	273.286	741.624	646.692	211.135	747.376	664.707	232.243	759.429	578.755	219.635	731.786	489.502	-279.23	670.163	873.6	-255.307	741.43	643.731	-193.767	747.443	661.163	-200.068	753.743	584.562	-185.46	731.003	500.596
222	2.21	0.63706	1090.24	786.394	68.4804	1086.16	836.368	-71.5799	1095.4	824.569	145.973	954.436	904.748	-134.972	951.897	884.978	13.0017	907.738	821.035	303.852	672.425	877.209	273.291	741.796	646.483	211.226	747.73	664.699	232.298	759.482	578.659	219.694	731.766	489.324	-279.318	670.216	873.595	-255.303	741.414	643.738	-193.743	747.429	661.147	-200.05	753.743	584.575	-185.447	730.983	500.63
223	2.22	0.45841	1090.24	786.667	68.2538	1086.17	836.791	-71.791	1095.32	824.798	145.836	954.575	904.951	-135.006	951.878	884.965	12.9771	907.579	821.208	304.173	672.986	876.939	273.33	741.948	646.201	211.331	748.155	664.606	232.39	759.528	578.475	219.81	731.703	489.088	-279.452	670.209	873.536	-255.296	741.37	643.688	-193.737	747.511	661.263	-200.025	753.718	584.541	-185.42	730.916	500.604
224	2.23	0.29514	1090.21	786.857	68.0759	1086.16	837.079	-71.9846	1095.26	824.966	145.686	954.719	905.162	-135.05	951.872	884.923	12.9659	907.383	821.402	304.534	673.594	876.62	273.382	742.121	645.875	211.437	748.653	664.488	232.533	759.629	578.262	219.946	731.634	488.822	-279.611	670.243	873.477	-255.266	741.327	643.644	-193.81	747.761	661.628	-200.027	753.662	584.476	-185.4	730.857	500.549
225	2.24	0.0996	1090.18	787.158	67.8779	1086.17	837.422	-72.1934	1095.23	825.212	145.529	954.885	905.375	-135.146	951.926	884.887	12.8813	907.242	821.566	304.94	674.241	876.278	273.427	742.403	645.505	211.493	749.327	664.267	232.699	759.83	578.088	220.066	731.586	488.563	-279.805	670.348	873.436	-255.298	741.318	643.652	-193.859	747.836	661.732	-200.053	753.641	584.463	-185.424	730.83	500.546
226	2.25	-0.087	1090.22	787.463	67.6834	1086.24	837.664	-72.4054	1095.23	825.442	145.366	955.072	905.583	-135.256	952.025	884.824	12.7886	907.218	821.612	305.442	675.018	875.866	273.412	742.852	644.895	211.603	750.325	663.927	232.905	760.152	577.87	220.186	731.557	488.345	-280.015	670.518	873.411	-255.337	741.339	643.662	-193.907	747.883	661.738	-200.08	753.66	584.471	-185.462	730.838	500.593
227	2.26	-0.17729	1090.37	787.502	67.743	1086.5	836.882	-72.5133	1095.26	825.537	145.198	955.274	905.743	-135.338	952.147	884.717	12.7413	907.312	821.468	305.959	675.792	875.394	273.291	743.277	644.274	211.823	751.621	663.537	233.209	760.293	577.557	220.439	731.291	488.505	-280.167	670.717	873.366	-255.353	741.406	643.576	-193.926	747.813	661.551	-200.074	753.681	584.441	-185.454	730.878	500.568
228	2.27	-0.16152	1090.55	787.46	68.0853	1086.92	835.093	-72.5345	1095.33	825.589	145.037	955.488	905.901	-135.388	952.258	884.623	12.742	907.451	821.297	306.439	676.538	874.919	273.104	743.592	643.67	212.1	753.241	663.185	233.63	760.216	577.21	220.885	730.729	489.123	-280.293	670.884	873.31	-255.37	741.483	643.496	-193.882	747.592	661.172	-200.042	753.711	584.412	-185.438	730.911	500.524
229	2.28	-0.1134	1090.68	787.506	68.1856	1087.09	834.737	-72.5117	1095.39	825.603	144.907	955.666	906.049	-135.409	952.346	884.522	12.7636	907.498	821.221	306.914	677.224	874.291	273.331	744.258	643.048	212.516	755.227	662.882	234.164	760.936	576.695	221.413	730.609	488.934	-280.434	671.038	873.29	-255.384	741.525	643.5	-193.872	747.552	661.061	-200.007	753.73	584.431	-185.425	730.919	500.529
230	2.29	-0.07295	1090.79	787.538	68.2212	1087.18	834.673	-72.457	1095.46	825.575	144.806	955.803	906.146	-135.403	952.424	884.376	12.7783	907.456	821.153	307.274	677.862	873.697	273.756	745.059	642.448	213.174	757.213	662.437	234.893	762.063	575.928	222.103	730.691	488.494	-280.561	671.167	873.282	-255.379	741.544	643.468	-193.859	747.549	660.997	-199.985	753.73	584.43	-185.424	730.92	500.514
231	2.3	-0.01643	1090.84	787.573	68.2337	1087.23	834.631	-72.4278	1095.5	825.532	144.733	955.927	906.198	-135.382	952.475	884.202	12.7942	907.384	821.157	307.575	678.42	873.002	274.302	745.984	641.634	213.919	760.123	661.967	235.898	763.63	575.631	222.861	731.323	487.8	-280.666	671.276	873.223	-255.414	741.55	643.438	-193.88	747.566	660.958	-199.993	753.695	584.365	-185.419	730.888	500.481
232	2.31	0.05958	1090.84	787.753	68.264	1087.22	834.639	-72.4021	1095.52	825.543	144.695	956.053	906.244	-135.355	952.509	884.041	12.7824	907.271	821.234	307.836	678.897	872.153	274.773	747.073	640.618	214.785	763.613	661.569	237.022	765.827	575.744	223.493	733.156	487.031	-280.792	671.377	873.128	-255.44	741.524	643.438	-193.924	747.68	661.116	-200.03	753.646	584.36	-185.435	730.847	500.529
233	2.32	0.18083	1090.83	787.919	68.3728	1087.2	834.644	-72.2979	1095.56	825.502	144.714	956.189	906.281	-135.283	952.56	883.872	12.8604	907.122	821.333	308.044	679.329	871.254	274.275	748.042	639.838	215.789	767.562	661.399	238.186	768.574	575.25	223.978	736.063	487.196	-280.914	671.518	873.134	-255.419	741.497	643.464	-193.98	747.925	661.522	-200.029	753.61	584.395	-185.429	730.825	500.533
234	2.33	0.38126	1090.85	787.951	68.4035	1087.07	835.428	-72.0923	1095.61	825.365	144.756	956.329	906.291	-135.162	952.628	883.666	13.0156	907.029	821.3	308.318	679.744	870.201	272.865	749.371	639.559	216.762	771.923	661.363	239.492	772.215	574.729	224.241	740.458	487.924	-281.011	671.711	873.213	-255.356	741.472	643.454	-193.943	747.981	661.588	-199.978	753.604	584.36	-185.372	730.775	500.528
235	2.34	0.61037	1090.91	787.922	68.279	1086.83	837.15	-71.8505	1095.7	825.198	144.798	956.484	906.305	-135.028	952.716	883.428	13.1746	907.034	821.099	309.121	680.194	868.721	272.471	751.65	639.05	217.604	776.794	661.504	240.288	776.444	574.801	223.639	746.538	488.438	-281.107	671.92	873.305	-255.309	741.498	643.435	-193.858	747.879	661.428	-199.908	753.628	584.313	-185.317	730.768	500.53
236	2.35	0.82757	1091.02	787.75	68.4704	1086.85	837.417	-71.6007	1095.84	825.035	144.842	956.66	906.336	-134.903	952.857	883.213	13.3155	907.105	820.865	310.008	680.655	866.923	272.016	754.534	638.506	218.364	782.15	661.857	240.484	781.22	575.248	221.963	753.821	489.042	-281.181	672.185	873.455	-255.283	741.58	643.438	-193.775	747.665	661.034	-199.863	753.687	584.343	-185.304	730.825	500.531
237	2.36	1.07018	1091.16	787.443	68.7694	1086.94	837.232	-71.3463	1095.95	824.821	144.91	956.831	906.379	-134.738	953.011	882.988	13.4719	907.184	820.614	310.094	681.139	865.428	270.021	757.366	637.992	218.912	787.827	662.499	239.72	786.422	575.912	218.964	762.456	489.036	-281.181	672.422	873.534	-255.269	741.678	643.414	-193.783	747.675	660.937	-199.82	753.73	584.346	-185.316	730.908	500.5
238	2.37	1.35654	1091.21	787.2	69.1022	1086.97	836.906	-71.0775	1096.02	824.649	145.026	956.963	906.455	-134.526	953.145	882.771	13.6557	907.209	820.408	311.558	682.125	863.132	268.054	759.821	636.435	219.028	793.625	663.354	238.008	791.938	576.806	214.578	772.323	488.165	-281.151	672.583	873.547	-255.259	741.758	643.35	-193.792	747.715	660.92	-199.807	753.745	584.329	-185.31	730.949	500.455
239	2.38	1.70929	1091.19	786.942	69.4429	1086.86	836.844	-70.7715	1096.01	824.503	145.145	957.047	906.573	-134.292	953.205	882.55	13.8447	907.147	820.3	311.659	683.372	861.955	265.46	763.38	635.725	218.713	799.373	664.607	235.865	798.056	577.87	209.918	782.03	488.695	-281.094	672.706	873.609	-255.257	741.749	643.367	-193.76	747.708	660.86	-199.806	753.686	584.317	-185.322	730.92	500.449
240	2.39	2.14982	1091.1	786.657	69.9997	1086.76	836.125	-70.3952	1095.95	824.317	145.262	957.094	906.753	-134.034	953.216	882.362	14.0523	907.03	820.277	311.331	683.857	860.01	262.405	767.503	635.334	218.059	805.165	666.015	233.185	804.595	579.055	204.755	792.32	489.986	-280.981	672.767	873.614	-255.232	741.7	643.384	-193.745	747.781	660.979	-199.804	753.61	584.291	-185.328	730.836	500.473
241	2.4	2.61811	1090.94	786.4	70.7922	1086.82	834.293	-69.8915	1095.92	824.135	145.372	957.123	906.934	-133.775	953.231	882.215	14.2606	906.937	820.268	311.067	683.039	856.215	258.832	771.951	634.981	217.119	811.087	667.792	229.903	811.48	580.382	198.799	802.852	491.899	-280.81	672.818	873.563	-255.204	741.633	643.394	-193.729	747.876	661.189	-199.827	753.56	584.249	-185.337	730.757	500.481
242	2.41	3.11581	1090.71	786.338	71.427	1086.65	833.933	-69.347	1095.9	823.947	145.47	957.173	907.116	-133.529	953.286	882.137	14.4941	906.869	820.346	311.449	683.374	853.029	254.899	776.873	634.897	215.911	817.261	669.767	226.148	818.592	582.123	192.212	813.64	494.529	-280.616	672.978	873.636	-255.18	741.607	643.418	-193.642	747.671	660.893	-199.874	753.534	584.239	-185.331	730.723	500.465
243	2.42	3.65941	1090.49	786.289	71.8385	1086.36	834.614	-68.8062	1095.95	823.72	145.558	957.252	907.261	-133.277	953.388	882.099	14.7264	906.877	820.275	311.934	684.06	849.832	250.62	782.14	635.104	214.65	823.634	672.076	221.893	826.007	584.158	185.149	825.004	497.574	-280.441	673.201	873.736	-255.17	741.64	643.431	-193.603	747.633	660.802	-199.892	753.568	584.241	-185.34	730.743	500.466
244	2.43	4.28074	1090.43	785.972	72.0574	1085.98	836.314	-68.2499	1096.07	823.503	145.641	957.343	907.389	-133.02	953.505	882.135	14.9954	906.989	820.059	312.344	684.856	846.412	246.101	787.661	635.357	213.453	829.979	674.427	217.294	833.617	586.441	177.524	836.635	501.204	-280.248	673.417	873.845	-255.13	741.691	643.424	-193.586	747.638	660.779	-199.855	753.611	584.232	-185.342	730.8	500.443
245	2.44	4.94274	1090.45	785.547	72.4775	1085.91	836.377	-67.6479	1096.18	823.232	145.715	957.428	907.534	-132.788	953.615	882.234	15.2453	907.085	819.873	312.758	685.813	842.958	241.392	793.323	635.862	212.285	836.21	676.672	212.262	840.956	588.609	169.464	848.258	505.477	-280.061	673.601	873.967	-255.076	741.726	643.412	-193.555	747.649	660.757	-199.821	753.653	584.193	-185.334	730.843	500.427
246	2.45	5.52798	1090.49	785.303	73.0592	1085.95	835.411	-67.0327	1096.28	822.92	145.783	957.516	907.662	-132.566	953.717	882.327	15.4175	907.183	819.718	313.125	686.761	839.239	236.498	799.3	636.64	211.019	842.489	679.4	206.817	848.05	591.129	161.248	859.825	510.268	-279.897	673.751	874.119	-255.055	741.782	643.417	-193.516	747.682	660.73	-199.815	753.659	584.191	-185.32	730.856	500.429
247	2.46	6.04785	1090.47	785.314	73.8261	1086.12	833.517	-66.4994	1096.35	822.67	145.858	957.625	907.797	-132.359	953.833	882.416	15.5525	907.242	819.692	313.386	687.859	835.469	231.372	805.39	637.892	209.69	848.742	682.248	201.166	855.732	595.186	152.759	871.277	516.09	-279.731	673.816	874.175	-255.062	741.839	643.423	-193.498	747.727	660.755	-199.821	753.656	584.231	-185.347	730.884	500.452
248	2.47	6.63348	1090.42	785.362	74.4004	1086.07	832.971	-66.0284	1096.4	822.503	145.939	957.704	907.895	-132.123	953.905	882.488	15.6807	907.28	819.699	313.606	689.115	831.481	225.59	811.216	639.85	208.324	854.849	685.171	195.377	863.475	599.898	144.165	882.606	522.576	-279.55	673.854	874.193	-255.048	741.862	643.491	-193.454	747.746	660.782	-199.839	753.635	584.289	-185.374	730.898	500.479
249	2.48	7.22919	1090.36	785.332	74.7847	1085.78	833.628	-65.5434	1096.4	822.367	146.041	957.769	907.99	-131.854	953.94	882.567	15.8229	907.225	819.757	313.866	690.252	827.159	219.336	816.873	642.321	206.787	860.788	688.237	189.895	871.332	604.373	135.819	893.877	529.25	-279.38	673.894	874.252	-255.026	741.816	643.541	-193.407	747.734	660.773	-199.853	753.59	584.299	-185.396	730.877	500.503
250	2.49	7.77832	1090.37	785.172	74.9967	1085.32	835.38	-64.9743	1096.43	822.211	146.161	957.809	908.127	-131.591	953.969	882.612	15.9968	907.131	819.881	314.213	691.408	822.655	213.386	822.649	644.712	205.061	866.535	691.593	184.697	879.416	608.037	127.564	904.962	536.819	-279.228	673.971	874.356	-255.006	741.749	643.619	-193.364	747.69	660.777	-199.866	753.549	584.322	-185.393	730.832	500.524
251	2.5	8.28955	1090.33	785.068	75.4619	1085.07	835.925	-64.4052	1096.5	822.059	146.264	957.844	908.298	-131.334	954.005	882.682	16.1797	907.062	819.946	314.566	692.728	818.065	207.499	828.498	647.217	203.3	872.109	694.926	178.857	886.792	612.951	118.809	915.623	546.42	-279.077	674.162	874.544	-254.97	741.703	643.68	-193.315	747.633	660.759	-199.87	753.525	584.33	-185.366	730.781	500.555
252	2.51	8.79396	1090.23	785.093	75.9735	1084.93	836.187	-63.879	1096.61	821.957	146.332	957.899	908.491	-131.088	954.071	882.747	16.3605	907.026	820.04	314.579	694.119	813.418	201.607	834.423	649.897	201.524	877.539	698.231	172.824	893.846	618.11	110.726	926.171	555.811	-278.957	674.44	874.749	-254.945	741.696	643.691	-193.306	747.604	660.742	-199.859	753.53	584.306	-185.351	730.773	500.549
253	2.52	9.32582	1090.12	785.082	76.5002	1084.9	836.205	-63.3621	1096.75	821.886	146.314	958.039	908.57	-130.866	954.198	882.73	16.5295	907.018	820.007	314.479	695.628	808.922	195.854	840.32	652.923	199.743	882.692	701.622	166.393	900.664	623.599	102.939	936.399	565.354	-278.884	674.711	874.85	-254.916	741.737	643.667	-193.336	747.756	660.916	-199.859	753.585	584.309	-185.327	730.79	500.533
254	2.53	9.89532	1090.11	784.842	77.1561	1085.03	835.364	-62.8711	1096.86	821.861	146.282	958.202	908.594	-130.644	954.361	882.668	16.6948	907.036	819.996	314.23	697.325	804.648	190.179	846.14	656.154	197.828	887.668	705.553	160.384	907.479	629.129	95.3934	946.215	575.164	-278.89	674.974	874.897	-254.893	741.789	643.641	-193.379	747.951	661.115	-199.864	753.645	584.276	-185.317	730.82	500.492
255	2.54	10.4247	1090.15	784.588	77.954	1085.25	833.587	-62.3711	1096.94	821.722	146.371	958.21	908.953	-130.47	954.488	882.643	16.8623	906.986	820.031	313.775	699.189	799.909	184.631	851.971	659.347	195.732	892.495	710.288	154.641	914.062	634.607	88.1191	955.608	585.306	-278.978	675.261	874.984	-254.898	741.836	643.61	-193.326	747.779	660.791	-199.852	753.651	584.215	-185.33	730.858	500.451
256	2.55	10.8621	1090.17	784.486	78.4043	1085.23	833.101	-61.9087	1096.99	821.481	146.365	958.257	909.233	-130.364	954.598	882.62	17.1535	906.582	820.661	313.046	701.38	794.234	179.254	857.745	662.619	193.337	897.263	715.248	149.033	920.611	640.759	81.2283	964.398	595.949	-279.095	675.532	875.041	-254.951	741.88	643.578	-193.317	747.761	660.703	-199.835	753.618	584.203	-185.361	730.884	500.457
257	2.56	11.2666	1090.13	784.612	78.5872	1085.03	833.674	-61.4988	1097.03	821.3	146.315	958.369	909.571	-130.28	954.69	882.599	17.5142	905.734	822.041	312.289	703.616	789.192	174.031	863.03	667.182	190.839	901.838	720.149	143.718	926.931	647.328	74.9395	972.591	606.805	-279.213	675.729	875.018	-254.993	741.912	643.603	-193.336	747.8	660.724	-199.857	753.567	584.258	-185.402	730.893	500.513
258	2.57	11.7048	1090.03	784.819	78.5855	1084.64	835.381	-61.1542	1097.06	821.236	146.231	958.481	909.872	-130.17	954.767	882.629	17.3723	905.67	821.774	311.506	705.88	784.407	169.014	867.64	673.304	188.678	905.931	723.786	138.606	933.025	654.44	69.0183	980.205	617.911	-279.302	675.882	874.945	-255.041	741.922	643.619	-193.385	747.825	660.754	-199.884	753.529	584.288	-185.437	730.886	500.555
259	2.58	12.2002	1089.94	784.892	78.9068	1084.4	835.83	-60.7917	1097.09	821.166	146.137	958.59	910.12	-130.04	954.838	882.631	17.8837	905.293	823.069	310.748	708.162	779.533	164.494	872.462	678.07	187.273	909.542	725.945	133.672	938.799	661.994	63.412	987.184	629.437	-279.37	676.081	874.915	-255.061	741.922	643.602	-193.429	747.83	660.758	-199.9	753.481	584.306	-185.435	730.854	500.572
260	2.59	12.7259	1089.9	784.811	79.3808	1084.18	836.048	-60.3542	1097.1	821.093	146.025	958.781	910.498	-129.906	954.911	882.677	18.7435	904.685	825.314	309.945	710.376	774.659	160.378	877.144	682.526	185.359	913.174	729.921	129.281	944.157	669.09	58.5941	993.711	640.661	-279.414	676.277	874.867	-255.032	741.893	643.616	-193.418	747.788	660.748	-199.903	753.469	584.289	-185.401	730.817	500.585
261	2.6	13.2611	1089.83	784.787	80.0041	1084.14	835.441	-59.8259	1097.13	820.993	145.857	959.105	911.046	-129.776	954.964	882.732	18.5263	904.865	824.532	309.124	712.553	769.69	156.562	881.633	686.885	183.457	916.466	734.07	125.304	949.166	676.137	54.1254	999.925	651.175	-279.479	676.52	874.888	-254.988	741.884	643.621	-193.432	747.868	660.926	-199.875	753.505	584.261	-185.345	730.77	500.586
262	2.61	13.7673	1089.72	784.817	80.7702	1084.35	833.841	-59.2711	1097.16	820.83	145.682	959.336	911.432	-129.701	955.062	882.798	18.0517	905.273	822.887	308.046	714.964	765.238	152.981	885.967	690.874	181.638	919.566	738.263	121.657	953.794	683.086	49.9652	1005.74	660.873	-279.567	676.812	874.992	-254.951	741.892	643.562	-193.487	748.125	661.298	-199.85	753.551	584.185	-185.289	730.717	500.563
263	2.62	14.2221	1089.6	784.865	81.2398	1084.36	833.582	-58.7831	1097.23	820.727	145.443	959.584	911.792	-129.645	955.196	882.825	18.4134	905.151	823.64	306.899	717.566	760.977	149.624	889.985	695.082	179.871	922.444	742.175	118.14	957.911	689.97	46.2547	1010.69	670.843	-279.683	677.075	875.072	-254.937	741.936	643.536	-193.494	748.216	661.389	-199.84	753.572	584.152	-185.272	730.741	500.554
264	2.63	14.6223	1089.59	784.835	81.6029	1084.32	833.706	-58.4004	1097.35	820.706	145.278	959.564	911.645	-129.637	955.364	882.858	17.6151	905.499	821.606	305.676	720.293	756.967	146.38	893.747	699.083	178.167	925.179	745.774	114.707	961.46	696.827	43.1133	1014.96	680.383	-279.829	677.306	875.156	-254.968	742.002	643.549	-193.49	748.191	661.208	-199.831	753.593	584.196	-185.293	730.805	500.53
265	2.64	14.9479	1089.65	784.65	81.8688	1084.27	833.826	-58.1202	1097.48	820.66	144.968	959.381	911.446	-129.672	955.531	882.928	17.9238	905.341	822.705	304.44	723.078	753.041	143.297	897.265	702.771	176.579	927.774	749.219	111.661	964.887	702.933	40.6991	1018.58	689.541	-279.979	677.474	875.207	-255.041	742.064	643.503	-193.449	748.017	660.796	-199.846	753.572	584.244	-185.357	730.874	500.518
266	2.65	15.2712	1089.74	784.492	82.1278	1084.22	833.96	-57.8692	1097.61	820.66	143.986	960.129	913.271	-129.724	955.646	882.949	18.0933	905.292	823.471	303.171	725.759	749.222	140.411	900.526	706.196	175.096	930.137	752.418	108.827	968.09	708.537	38.1472	1022.09	697.909	-280.103	677.566	875.202	-255.145	742.124	643.458	-193.544	748.131	660.884	-199.863	753.519	584.261	-185.413	730.906	500.508
267	2.66	15.624	1089.77	784.466	82.2265	1084.07	834.862	-57.6181	1097.69	820.629	142.912	961.038	915.461	-129.76	955.703	882.996	18.0809	905.287	823.793	301.965	728.321	745.699	137.756	903.568	709.478	173.718	932.311	755.251	106.237	971.014	713.782	35.7627	1025.15	705.956	-280.198	677.61	875.174	-255.188	742.151	643.47	-193.646	748.276	661.107	-199.878	753.495	584.292	-185.43	730.904	500.545
268	2.67	16.0321	1089.69	784.788	82.113	1083.78	836.651	-57.3259	1097.7	820.579	142.688	961.422	915.962	-129.78	955.728	883.076	18.0038	905.351	823.93	300.869	730.863	742.487	135.337	906.19	712.652	172.526	934.322	757.875	103.976	973.584	718.703	33.3636	1027.83	713.881	-280.23	677.672	875.205	-255.158	742.124	643.482	-193.581	748.065	660.865	-199.883	753.489	584.32	-185.418	730.891	500.578
269	2.68	16.4843	1089.6	785.14	82.3294	1083.65	837.169	-56.9432	1097.67	820.518	143.709	960.961	913.858	-129.767	955.723	883.119	17.7043	905.785	822.987	299.929	733.39	739.582	133.158	908.461	715.686	171.391	936.127	760.182	101.975	975.748	723.202	30.9161	1030.02	721.712	-280.181	677.749	875.207	-255.083	742.082	643.493	-193.56	748.079	660.964	-199.839	753.504	584.266	-185.357	730.853	500.584
270	2.69	16.8936	1089.61	785.331	82.6909	1083.48	837.506	-56.5484	1097.7	820.389	143.824	960.955	913.45	-129.75	955.699	883.137	17.1371	906.651	820.777	299.012	735.87	736.829	131.201	910.543	718.419	170.33	937.82	762.242	100.087	977.599	727.37	28.9705	1031.8	728.293	-280.126	677.829	875.225	-255.281	742.32	643.001	-193.566	748.266	661.312	-200.075	754.21	583.35	-185.232	731.187	499.877
271	2.7	17.2312	1089.65	785.335	82.978	1083.34	837.749	-56.2488	1097.76	820.26	143.65	961.107	913.485	-129.802	955.688	883.153	16.9746	906.985	820.513	298.11	738.294	734.261	129.309	912.48	720.786	169.281	939.369	764.166	98.2507	979.322	731.133	27.2327	1033.33	733.939	-280.135	677.907	875.333	-255.598	742.643	642.39	-193.537	748.287	661.393	-200.397	755.066	582.264	-185.148	731.643	499.012
272	2.71	17.4874	1089.71	785.211	83.1402	1083.36	837.78	-56.0118	1097.85	820.123	143.403	961.304	913.601	-129.915	955.715	883.236	16.9184	907.079	820.891	297.267	740.593	731.868	127.46	914.262	722.777	168.171	940.775	765.774	96.4533	980.871	734.246	25.5933	1034.63	738.796	-280.157	677.923	875.403	-255.166	742.17	643.233	-193.535	748.18	661.263	-199.991	753.927	583.767	-185.264	730.968	500.185
273	2.72	17.7068	1089.75	785.05	83.2324	1083.41	837.707	-55.8414	1097.96	819.963	143.228	961.418	913.569	-130.06	955.768	883.309	16.7674	907.222	820.941	296.51	742.807	729.735	125.752	915.763	724.624	167.093	942.012	767.172	94.885	982.133	737.066	24.0508	1035.69	743.136	-280.176	677.858	875.398	-255.119	742.049	643.442	-193.489	747.95	660.821	-199.923	753.619	584.107	-185.358	730.85	500.472
274	2.73	17.9025	1089.81	784.908	83.2649	1083.48	837.672	-55.7251	1098.05	819.8	143.131	961.415	913.292	-130.205	955.794	883.358	16.5822	907.332	820.916	295.821	744.857	727.892	124.172	916.983	726.479	166.062	943.121	768.475	93.3657	983.221	739.601	22.5904	1036.55	747.021	-280.186	677.75	875.335	-255.176	742.04	643.488	-193.55	747.952	660.759	-199.964	753.506	584.2	-185.434	730.863	500.578
275	2.74	18.0721	1089.89	784.826	83.278	1083.57	837.75	-55.6583	1098.16	819.673	142.853	961.629	913.336	-130.351	955.792	883.409	16.421	907.402	820.926	295.273	746.77	726.291	122.698	918.019	728.141	165.14	944.059	769.708	91.8791	984.073	741.89	21.2317	1037.21	750.502	-280.16	677.609	875.251	-255.261	742.072	643.503	-193.67	748.108	660.97	-200.017	753.475	584.271	-185.498	730.904	500.616
276	2.75	18.238	1089.98	784.689	83.3443	1083.65	837.823	-55.5642	1098.26	819.481	142.599	961.817	913.39	-130.451	955.776	883.404	16.3078	907.49	820.802	294.917	748.493	724.887	121.434	918.964	729.44	164.381	944.831	770.817	90.5922	984.732	743.815	20.0552	1037.62	753.518	-280.065	677.49	875.185	-255.289	742.087	643.512	-193.763	748.268	661.208	-200.023	753.481	584.309	-185.512	730.924	500.652
[truncated: 293 more rows]
[truncated: 9 more columns]

## Sheet: Trial02
PathFileType	4	(X/Y/Z)	Trial02.trc
DataRate	CameraRate	NumFrames	NumMarkers	Units	OrigDataRate	OrigDataStartFrame	OrigNumFrames
100	100	568	18	mm	100	1	568
[truncated: 570 more rows]
[truncated: 6 more columns]

## Sheet: Trial03
PathFileType	4	(X/Y/Z)	Trial03.trc
[truncated: 552 more rows]

## Sheet: Trial04
PathFileType	4	(X/Y/Z)	Trial04.trc
[truncated: 593 more rows]
[truncated: 12 more columns]

[truncated: 1 more sheets: Trial05]
