# Supplementary material for: Upper-Limb Kinematic Variables are correlated with Fugl-Meyer Assessment Sub Scales During a Hand-to-Mouth Functional Task in Post-Stroke Individuals
Source: Research Square preprint supplement (doi:10.21203/rs.3.rs-8270137/v1), 2025-12-16
Supplement: Supplementary file 19 [file Additional file 15.xls]

## Sheet: Static
PathFileType	4	(X/Y/Z)	Static.trc
DataRate	CameraRate	NumFrames	NumMarkers	Units	OrigDataRate	OrigDataStartFrame	OrigNumFrames
100	100	668	17	mm	100	1	668
Frame#	Time	nasion			r zyg pr			l zyg pr			r should			l should			sternum			r elbow			r ulna			r radius			r hand			r finger			l elbow			l ulna			l radius			l hand			l finger
		X1	Y1	Z1	X2	Y2	Z2	X3	Y3	Z3	X4	Y4	Z4	X5	Y5	Z5	X6	Y6	Z6	X7	Y7	Z7	X8	Y8	Z8	X9	Y9	Z9	X10	Y10	Z10	X11	Y11	Z11	X12	Y12	Z12	X13	Y13	Z13	X14	Y14	Z14	X15	Y15	Z15	X16	Y16	Z16
1	0	3.93771	1133.73	469.374	66.3598	1135.1	510.578	-66.7207	1129.79	505.847	165.097	966.502	585.33	-160.665	970.859	582.442	-2.79457	949.098	547.707	272.757	668.198	604.648	278.616	729.655	376.605	217.265	741.939	388.375	232.262	756.542	302.507	212.879	732.482	216.886	-297.748	702.774	617.307	-271.319	734.206	388.025	-206.974	749.429	396.533	-220.443	760.222	319.21	-199.653	731.914	227.486
2	0.01	4.01432	1133.82	469.565	66.4012	1135.16	510.752	-66.6678	1129.88	505.934	165.083	966.488	585.451	-160.672	970.851	582.509	-2.7727	949.151	547.726	272.739	668.184	604.63	278.643	729.649	376.54	217.272	741.916	388.33	232.233	756.549	302.396	212.897	732.458	216.872	-297.696	702.726	617.249	-271.291	734.197	387.969	-206.965	749.412	396.445	-220.38	760.035	318.937	-199.657	731.91	227.457
3	0.02	4.10964	1133.93	469.767	66.4825	1135.22	510.976	-66.5904	1129.96	506.09	165.105	966.48	585.554	-160.654	970.839	582.575	-2.71936	949.146	547.846	272.716	668.17	604.618	278.677	729.623	376.522	217.317	741.882	388.358	232.267	756.515	302.367	212.945	732.431	216.863	-297.653	702.687	617.238	-271.267	734.187	387.942	-206.931	749.399	396.421	-220.344	759.972	318.853	-199.629	731.893	227.433
4	0.03	4.14013	1134.02	469.997	66.5172	1135.25	511.246	-66.5595	1130.03	506.333	165.085	966.469	585.69	-160.662	970.83	582.665	-2.71339	949.165	547.966	272.704	668.174	604.643	278.676	729.617	376.552	217.318	741.869	388.399	232.303	756.481	302.385	212.96	732.423	216.897	-297.65	702.691	617.313	-271.26	734.182	387.988	-206.943	749.394	396.48	-220.36	759.946	318.92	-199.62	731.871	227.469
5	0.04	4.13606	1134.17	470.047	66.4994	1135.34	511.412	-66.5431	1130.13	506.536	165.043	966.471	585.82	-160.69	970.855	582.759	-2.73381	949.213	548.054	272.679	668.178	604.669	278.65	729.657	376.559	217.296	741.901	388.411	232.281	756.494	302.392	212.958	732.44	216.94	-297.637	702.683	617.302	-271.268	734.196	388.004	-206.963	749.401	396.48	-220.374	759.943	318.96	-199.647	731.889	227.488
6	0.05	4.13756	1134.32	470.035	66.4668	1135.45	511.487	-66.5273	1130.22	506.698	165.041	966.487	585.89	-160.688	970.869	582.83	-2.7328	949.276	548.048	272.654	668.173	604.67	278.642	729.711	376.537	217.277	741.935	388.345	232.234	756.54	302.363	212.94	732.465	216.889	-297.595	702.655	617.272	-271.262	734.204	387.98	-206.929	749.413	396.421	-220.364	759.935	318.945	-199.658	731.906	227.492
7	0.06	4.13506	1134.39	470.129	66.471	1135.53	511.63	-66.5253	1130.28	506.85	165.031	966.489	585.96	-160.688	970.868	582.874	-2.71418	949.284	548.108	272.626	668.155	604.627	278.633	729.721	376.515	217.259	741.942	388.31	232.245	756.557	302.359	212.93	732.478	216.854	-297.596	702.637	617.296	-271.264	734.195	388.021	-206.917	749.413	396.469	-220.369	759.968	319.023	-199.655	731.903	227.494
8	0.07	4.12416	1134.44	470.253	66.4702	1135.57	511.763	-66.5192	1130.34	507.02	165.018	966.486	586.027	-160.686	970.865	582.927	-2.70441	949.271	548.2	272.607	668.177	604.651	278.622	729.716	376.525	217.252	741.941	388.357	232.258	756.559	302.379	212.932	732.479	216.858	-297.616	702.638	617.307	-271.264	734.197	388.04	-206.94	749.415	396.545	-220.389	760.042	319.137	-199.653	731.903	227.488
9	0.08	4.12251	1134.51	470.267	66.4585	1135.61	511.842	-66.4985	1130.39	507.101	165.015	966.492	586.067	-160.679	970.87	582.948	-2.70529	949.284	548.174	272.579	668.164	604.656	278.626	729.712	376.537	217.251	741.936	388.383	232.243	756.553	302.385	212.921	732.482	216.852	-297.6	702.637	617.298	-271.251	734.194	387.994	-206.929	749.449	396.498	-220.354	759.96	318.988	-199.65	731.915	227.444
10	0.09	4.10828	1134.55	470.331	66.4535	1135.63	511.916	-66.5168	1130.41	507.227	165.028	966.473	586.114	-160.68	970.874	582.967	-2.70517	949.258	548.176	272.574	668.106	604.617	278.637	729.712	376.568	217.254	741.924	388.374	232.234	756.518	302.395	212.914	732.482	216.878	-297.577	702.613	617.287	-271.244	734.185	387.996	-206.897	749.45	396.453	-220.339	759.946	318.952	-199.649	731.92	227.469
11	0.1	4.09669	1134.54	470.456	66.4589	1135.63	512.001	-66.5521	1130.4	507.338	165.046	966.441	586.163	-160.669	970.848	583.001	-2.69887	949.217	548.279	272.601	668.089	604.611	278.644	729.69	376.598	217.049	742.162	388.509	232.276	756.515	302.455	212.947	732.476	216.943	-297.575	702.619	617.315	-271.247	734.173	388.027	-206.889	749.437	396.464	-220.353	759.943	318.987	-199.636	731.903	227.493
12	0.11	4.08026	1134.53	470.484	66.4435	1135.64	512.012	-66.5535	1130.37	507.304	165.059	966.413	586.162	-160.651	970.818	582.963	-2.66974	949.207	548.291	272.625	668.07	604.621	278.672	729.664	376.604	216.789	742.474	388.64	232.293	756.516	302.473	212.964	732.463	216.951	-297.571	702.627	617.34	-271.243	734.158	388.025	-206.883	749.428	396.463	-220.361	759.954	318.923	-199.632	731.882	227.461
13	0.12	4.05462	1134.54	470.454	66.4106	1135.66	511.959	-66.5741	1130.37	507.28	165.071	966.403	586.118	-160.65	970.815	582.936	-2.66468	949.183	548.28	272.636	668.063	604.651	278.668	729.665	376.569	217.155	742.028	388.423	232.253	756.508	302.405	212.966	732.462	216.923	-297.552	702.585	617.3	-271.241	734.157	388.015	-206.891	749.426	396.437	-220.361	759.93	318.906	-199.637	731.893	227.453
14	0.13	3.99027	1134.53	470.493	66.3493	1135.68	511.891	-66.6423	1130.35	507.337	165.068	966.389	586.105	-160.653	970.805	582.928	-2.67667	949.172	548.248	272.654	668.033	604.636	278.643	729.666	376.565	217.241	741.922	388.402	232.26	756.524	302.402	212.943	732.458	216.912	-297.552	702.566	617.337	-271.25	734.155	388.016	-206.941	749.404	396.488	-220.383	759.919	318.95	-199.649	731.893	227.491
15	0.14	3.91956	1134.48	470.509	66.3022	1135.68	511.812	-66.6993	1130.31	507.25	165.085	966.365	586.071	-160.652	970.783	582.898	-2.67893	949.14	548.161	272.691	668.001	604.599	278.629	729.653	376.576	217.264	741.88	388.407	232.28	756.53	302.416	212.935	732.463	216.93	-297.555	702.528	617.317	-271.267	734.144	388.019	-206.978	749.388	396.554	-220.43	759.962	319.052	-199.674	731.886	227.488
16	0.15	3.88311	1134.47	470.383	66.2744	1135.68	511.727	-66.7249	1130.26	507.081	165.094	966.349	585.997	-160.641	970.774	582.834	-2.65614	949.116	548.095	272.714	668.013	604.629	278.634	729.647	376.546	217.267	741.882	388.391	232.279	756.525	302.415	212.927	732.474	216.901	-297.529	702.491	617.272	-271.265	734.137	387.998	-206.96	749.408	396.508	-220.45	760.017	319.091	-199.682	731.878	227.459
17	0.16	3.83979	1134.44	470.328	66.2121	1135.68	511.56	-66.779	1130.2	506.974	165.096	966.341	585.912	-160.627	970.763	582.763	-2.64948	949.094	548.034	272.729	668.002	604.62	278.627	729.672	376.521	217.255	741.894	388.352	232.25	756.534	302.423	212.891	732.493	216.844	-297.504	702.483	617.282	-271.269	734.155	387.985	-206.935	749.42	396.474	-220.421	759.929	318.965	-199.685	731.885	227.457
18	0.17	3.78308	1134.39	470.302	66.1441	1135.67	511.385	-66.8483	1130.17	506.914	165.11	966.315	585.837	-160.614	970.76	582.727	-2.65226	949.077	547.983	272.748	667.941	604.554	278.608	729.687	376.521	217.245	741.908	388.342	232.235	756.568	302.416	212.864	732.51	216.836	-297.486	702.497	617.323	-271.298	734.171	388.025	-206.94	749.438	396.473	-220.425	759.922	318.939	-199.701	731.897	227.497
19	0.18	3.74236	1134.36	470.168	66.1211	1135.65	511.171	-66.8748	1130.1	506.726	165.146	966.288	585.71	-160.58	970.757	582.642	-2.62373	949.076	547.848	272.79	667.88	604.503	278.626	729.683	376.503	217.274	741.918	388.359	232.254	756.584	302.39	212.883	732.512	216.82	-297.45	702.502	617.347	-271.275	734.176	388.015	-206.928	749.438	396.44	-220.404	759.939	318.914	-199.687	731.91	227.491
20	0.19	3.74535	1134.3	469.992	66.1274	1135.6	510.996	-66.8781	1130.04	506.491	165.195	966.258	585.585	-160.527	970.758	582.532	-2.5775	949.084	547.612	272.839	667.834	604.491	278.655	729.683	376.491	217.311	741.909	388.352	232.262	756.544	302.365	212.922	732.502	216.835	-297.376	702.52	617.376	-271.231	734.192	387.944	-206.885	749.457	396.391	-220.372	759.956	318.87	-199.652	731.926	227.426
21	0.2	3.69312	1134.21	469.888	66.1164	1135.53	510.862	-66.9027	1129.96	506.368	165.237	966.221	585.508	-160.476	970.746	582.446	-2.56659	949.052	547.504	272.886	667.802	604.48	278.68	729.682	376.531	217.334	741.887	388.375	232.265	756.518	302.372	212.952	732.493	216.884	-297.318	702.511	617.39	-271.215	734.185	387.962	-206.861	749.464	396.386	-220.366	759.958	318.877	-199.65	731.925	227.414
22	0.21	3.62509	1134.1	469.754	66.1004	1135.45	510.719	-66.9563	1129.85	506.286	165.258	966.184	585.411	-160.447	970.724	582.374	-2.56436	948.988	547.5	272.939	667.741	604.421	278.71	729.644	376.591	217.35	741.872	388.414	232.274	756.521	302.394	212.972	732.487	216.939	-297.278	702.473	617.388	-271.225	734.162	388.016	-206.86	749.447	396.421	-220.384	759.956	318.945	-199.662	731.915	227.458
23	0.22	3.59148	1133.98	469.527	66.0855	1135.38	510.475	-66.974	1129.73	506.118	165.288	966.148	585.279	-160.407	970.7	582.268	-2.56207	948.916	547.36	272.97	667.703	604.4	278.717	729.623	376.584	217.37	741.859	388.427	232.279	756.518	302.376	212.97	732.463	216.949	-297.23	702.442	617.387	-271.213	734.15	388.032	-206.873	749.42	396.445	-220.383	759.923	318.939	-199.659	731.895	227.445
24	0.23	3.5259	1133.85	469.217	66.0359	1135.3	510.224	-67.0075	1129.62	505.955	165.319	966.096	585.152	-160.375	970.689	582.147	-2.56302	948.826	547.205	272.98	667.672	604.407	278.712	729.6	376.551	217.362	741.83	388.402	232.281	756.49	302.376	212.947	732.437	216.926	-297.209	702.401	617.344	-271.209	734.127	388.004	-206.905	749.397	396.486	-220.398	759.858	318.919	-199.661	731.868	227.427
25	0.24	3.40452	1133.75	468.934	65.9667	1135.24	510.013	-67.072	1129.51	505.877	165.326	966.052	585.075	-160.378	970.681	582.036	-2.57856	948.746	547.192	272.988	667.647	604.383	278.672	729.596	376.541	217.331	741.827	388.436	232.243	756.493	302.374	212.903	732.439	216.918	-297.218	702.384	617.354	-271.246	734.118	388.032	-206.943	749.375	396.549	-220.453	759.819	318.972	-199.696	731.851	227.456
26	0.25	3.303	1133.67	468.618	65.9049	1135.18	509.751	-67.1295	1129.42	505.793	165.31	966.033	584.967	-160.368	970.701	581.951	-2.57166	948.723	547.057	272.983	667.583	604.287	278.633	729.62	376.532	217.314	741.848	388.445	232.226	756.515	302.369	212.874	732.451	216.911	-297.209	702.414	617.39	-271.271	734.122	388.042	-206.947	749.373	396.525	-220.481	759.827	319.021	-199.725	731.859	227.48
27	0.26	3.26315	1133.62	468.159	65.8995	1135.11	509.46	-67.1308	1129.33	505.612	165.332	966.002	584.805	-160.323	970.724	581.817	-2.51818	948.729	546.732	272.989	667.535	604.256	278.656	729.638	376.502	217.312	741.874	388.371	232.204	756.529	302.33	212.873	732.48	216.853	-297.149	702.469	617.421	-271.252	734.136	388.01	-206.898	749.403	396.45	-220.444	759.835	318.966	-199.705	731.872	227.439
28	0.27	3.26735	1133.54	467.863	65.91	1135.03	509.214	-67.1112	1129.22	505.434	165.372	965.951	584.671	-160.26	970.743	581.697	-2.44394	948.688	546.516	273.014	667.484	604.242	278.689	729.641	376.496	217.338	741.864	388.347	232.204	756.523	302.331	212.888	732.493	216.815	-297.097	702.52	617.466	-271.212	734.134	387.996	-206.848	749.422	396.401	-220.401	759.846	318.9	-199.674	731.875	227.429
29	0.28	3.25275	1133.45	467.677	65.9296	1134.96	509.051	-67.1151	1129.13	505.324	165.409	965.896	584.575	-160.221	970.764	581.601	-2.38316	948.646	546.429	273.045	667.41	604.204	278.701	729.641	376.534	217.357	741.857	388.38	232.23	756.551	302.376	212.903	732.508	216.869	-297.046	702.532	617.468	-271.213	734.149	388.019	-206.864	749.442	396.418	-220.408	759.875	318.9	-199.67	731.876	227.456
30	0.29	3.21307	1133.37	467.457	65.9468	1134.88	508.864	-67.1188	1129.06	505.197	165.419	965.85	584.477	-160.204	970.791	581.492	-2.34472	948.651	546.237	273.083	667.342	604.168	278.705	729.64	376.557	217.36	741.866	388.393	232.241	756.573	302.358	212.889	732.514	216.843	-296.994	702.534	617.452	-271.245	734.166	388.012	-206.885	749.479	396.416	-220.42	759.909	318.874	-199.68	731.889	227.432
31	0.3	3.21598	1133.27	467.31	65.9693	1134.77	508.623	-67.1013	1128.98	504.98	165.439	965.796	584.363	-160.169	970.79	581.364	-2.32527	948.598	546.085	273.107	667.284	604.151	278.709	729.625	376.55	217.364	741.85	388.385	232.225	756.559	302.344	212.888	732.49	216.831	-296.951	702.523	617.423	-271.239	734.165	387.987	-206.873	749.485	396.379	-220.426	759.901	318.846	-199.685	731.879	227.417
32	0.31	3.23834	1133.09	467.366	65.9975	1134.64	508.477	-67.0791	1128.86	504.839	165.466	965.736	584.291	-160.134	970.778	581.274	-2.31131	948.453	546.125	273.106	667.268	604.171	278.701	729.593	376.559	217.375	741.827	388.436	232.228	756.537	302.38	212.912	732.457	216.884	-296.958	702.519	617.415	-271.245	734.138	388.052	-206.9	749.454	396.445	-220.445	759.862	318.908	-199.688	731.854	227.462
33	0.32	3.24699	1132.95	467.369	66.0277	1134.53	508.356	-67.0571	1128.77	504.718	165.489	965.684	584.252	-160.117	970.779	581.202	-2.29314	948.365	546.141	273.086	667.219	604.138	278.689	729.581	376.583	217.364	741.811	388.458	232.264	756.544	302.423	212.902	732.452	216.913	-296.983	702.515	617.398	-271.26	734.118	388.078	-206.946	749.418	396.518	-220.475	759.825	318.966	-199.705	731.846	227.479
34	0.33	3.28019	1132.87	467.2	66.0449	1134.44	508.157	-67.0333	1128.7	504.48	165.498	965.655	584.153	-160.101	970.781	581.075	-2.25134	948.353	545.993	273.078	667.148	604.079	278.682	729.578	376.548	217.339	741.796	388.398	232.252	756.524	302.395	212.874	732.461	216.873	-296.981	702.537	617.394	-271.27	734.116	388.043	-206.949	749.401	396.461	-220.474	759.814	318.917	-199.715	731.843	227.429
35	0.34	3.33844	1132.78	467.064	66.0727	1134.37	507.953	-66.9818	1128.65	504.29	165.517	965.622	584.058	-160.068	970.79	580.997	-2.19912	948.315	545.929	273.063	667.094	604.008	278.696	729.566	376.541	217.346	741.804	388.4	232.253	756.505	302.376	212.873	732.462	216.867	-296.981	702.563	617.408	-271.256	734.107	388.024	-206.936	749.387	396.446	-220.453	759.808	318.889	-199.695	731.836	227.418
36	0.35	3.39949	1132.71	466.986	66.1319	1134.31	507.84	-66.9241	1128.58	504.184	165.56	965.591	584.052	-160.029	970.81	580.946	-2.14269	948.269	545.9	273.059	667.071	603.996	278.7	729.575	376.565	217.374	741.81	388.464	232.288	756.513	302.404	212.911	732.474	216.89	-296.977	702.616	617.465	-271.233	734.106	388.04	-206.929	749.388	396.508	-220.443	759.828	318.901	-199.683	731.849	227.458
37	0.36	3.45744	1132.67	466.84	66.1874	1134.26	507.739	-66.8693	1128.52	504.053	165.588	965.556	583.993	-159.993	970.827	580.862	-2.09164	948.26	545.794	273.062	667.028	603.972	278.713	729.586	376.58	217.391	741.811	388.472	232.272	756.512	302.401	212.922	732.491	216.88	-296.946	702.649	617.512	-271.226	734.124	388.016	-206.898	749.436	396.463	-220.423	759.855	318.883	-199.678	731.869	227.433
38	0.37	3.49506	1132.66	466.667	66.2412	1134.22	507.622	-66.8181	1128.48	503.882	165.611	965.535	583.909	-159.962	970.832	580.766	-2.04153	948.278	545.654	273.069	666.985	603.957	278.716	729.6	376.536	217.387	741.82	388.425	232.233	756.529	302.39	212.909	732.507	216.839	-296.911	702.64	617.489	-271.222	734.148	387.977	-206.853	749.466	396.378	-220.404	759.866	318.856	-199.675	731.876	227.406
39	0.38	3.53363	1132.63	466.624	66.2901	1134.17	507.543	-66.7737	1128.45	503.799	165.634	965.499	583.887	-159.925	970.836	580.721	-2.01843	948.254	545.649	273.09	666.942	603.954	278.73	729.608	376.558	217.4	741.833	388.448	232.227	756.551	302.392	212.917	732.502	216.866	-296.887	702.638	617.483	-271.23	734.171	387.996	-206.862	749.46	396.424	-220.411	759.859	318.865	-199.679	731.874	227.439
40	0.39	3.56686	1132.56	466.598	66.332	1134.13	507.46	-66.7379	1128.42	503.734	165.662	965.45	583.881	-159.89	970.838	580.699	-2.00632	948.202	545.683	273.089	666.916	603.948	278.734	729.592	376.593	217.399	741.817	388.468	232.219	756.56	302.369	212.926	732.486	216.871	-296.879	702.625	617.483	-271.23	734.156	388.025	-206.885	749.455	396.475	-220.419	759.833	318.893	-199.684	731.856	227.47
41	0.4	3.60761	1132.51	466.549	66.377	1134.11	507.441	-66.6999	1128.39	503.661	165.677	965.404	583.859	-159.871	970.839	580.642	-1.96944	948.154	545.676	273.092	666.887	603.951	278.725	729.571	376.581	217.392	741.793	388.474	232.198	756.55	302.347	212.912	732.473	216.872	-296.868	702.623	617.454	-271.236	734.151	387.993	-206.888	749.462	396.45	-220.418	759.826	318.87	-199.682	731.859	227.452
42	0.41	3.65137	1132.48	466.543	66.4071	1134.08	507.41	-66.654	1128.38	503.682	165.679	965.363	583.858	-159.859	970.832	580.625	-1.96247	948.117	545.683	273.098	666.849	603.938	278.71	729.555	376.578	217.384	741.788	388.483	232.202	756.555	302.382	212.888	732.468	216.887	-296.867	702.616	617.409	-271.237	734.15	387.991	-206.883	749.442	396.431	-220.432	759.818	318.89	-199.693	731.866	227.474
43	0.42	3.68623	1132.47	466.568	66.4418	1134.08	507.366	-66.6115	1128.36	503.68	165.703	965.329	583.839	-159.84	970.833	580.627	-1.93945	948.08	545.718	273.107	666.821	603.935	278.706	729.56	376.563	217.387	741.791	388.504	232.224	756.564	302.39	212.881	732.472	216.888	-296.87	702.642	617.442	-271.23	734.13	388.047	-206.894	749.419	396.431	-220.443	759.811	318.937	-199.693	731.859	227.505
44	0.43	3.74171	1132.46	466.525	66.4928	1134.08	507.307	-66.5438	1128.34	503.617	165.733	965.279	583.811	-159.794	970.818	580.574	-1.87718	948.047	545.656	273.108	666.81	603.95	278.701	729.548	376.526	217.391	741.782	388.457	232.243	756.544	302.375	212.892	732.472	216.865	-296.865	702.675	617.47	-271.211	734.127	388.027	-206.879	749.424	396.392	-220.419	759.809	318.896	-199.678	731.834	227.456
45	0.44	3.81263	1132.44	466.469	66.544	1134.07	507.331	-66.4892	1128.32	503.595	165.767	965.217	583.813	-159.754	970.813	580.525	-1.82985	948.026	545.634	273.086	666.778	603.936	278.698	729.545	376.504	217.41	741.765	388.447	232.279	756.517	302.391	212.92	732.474	216.86	-296.853	702.678	617.452	-271.204	734.133	388.029	-206.842	749.424	396.39	-220.387	759.821	318.843	-199.666	731.822	227.446
46	0.45	3.84069	1132.47	466.507	66.5577	1134.07	507.407	-66.4821	1128.34	503.703	165.802	965.182	583.886	-159.744	970.832	580.568	-1.83737	948.006	545.731	273.078	666.753	603.94	278.702	729.558	376.55	217.4	741.757	388.495	232.264	756.507	302.415	212.907	732.484	216.901	-296.854	702.685	617.462	-271.215	734.132	388.06	-206.854	749.397	396.455	-220.409	759.819	318.876	-199.665	731.82	227.495
47	0.46	3.83622	1132.48	466.592	66.5588	1134.07	507.449	-66.484	1128.36	503.794	165.813	965.169	583.924	-159.744	970.843	580.598	-1.83268	947.979	545.827	273.083	666.725	603.927	278.687	729.557	376.572	217.369	741.761	388.47	232.24	756.518	302.412	212.882	732.482	216.927	-296.862	702.681	617.478	-271.226	734.128	388.075	-206.869	749.38	396.479	-220.424	759.79	318.907	-199.675	731.83	227.494
48	0.47	3.87187	1132.49	466.596	66.5998	1134.06	507.479	-66.4337	1128.37	503.791	165.842	965.145	583.932	-159.698	970.834	580.564	-1.79725	947.963	545.759	273.08	666.691	603.907	278.705	729.543	376.561	217.381	741.764	388.473	232.245	756.52	302.417	212.89	732.463	216.891	-296.835	702.693	617.475	-271.213	734.143	388.034	-206.846	749.387	396.433	-220.393	759.783	318.848	-199.654	731.832	227.451
49	0.48	3.89532	1132.55	466.61	66.6492	1134.07	507.565	-66.3863	1128.4	503.844	165.876	965.136	583.99	-159.647	970.849	580.562	-1.75476	947.976	545.736	273.062	666.654	603.894	278.723	729.553	376.573	217.396	741.771	388.501	232.268	756.525	302.463	212.91	732.473	216.877	-296.817	702.716	617.467	-271.2	734.172	388.027	-206.831	749.406	396.44	-220.374	759.796	318.825	-199.643	731.842	227.474
50	0.49	3.88222	1132.62	466.636	66.6703	1134.1	507.649	-66.3783	1128.44	503.969	165.902	965.136	584.053	-159.636	970.883	580.628	-1.7493	948.026	545.72	273.063	666.635	603.922	278.715	729.58	376.57	217.405	741.791	388.536	232.265	756.557	302.492	212.913	732.497	216.893	-296.813	702.758	617.509	-271.202	734.193	388.068	-206.854	749.443	396.47	-220.366	759.819	318.898	-199.651	731.863	227.506
51	0.5	3.89363	1132.73	466.529	66.6888	1134.14	507.684	-66.3566	1128.46	504.029	165.925	965.115	584.033	-159.62	970.902	580.647	-1.71748	948.082	545.668	273.072	666.601	603.946	278.705	729.604	376.552	217.393	741.806	388.5	232.23	756.593	302.427	212.899	732.503	216.875	-296.789	702.773	617.509	-271.204	734.212	388.029	-206.822	749.477	396.411	-220.351	759.831	318.917	-199.642	731.878	227.498
52	0.51	3.94841	1132.77	466.499	66.7383	1134.16	507.713	-66.3131	1128.47	504.042	165.973	965.074	584.054	-159.587	970.91	580.635	-1.6624	948.082	545.605	273.07	666.566	603.959	278.718	729.594	376.543	217.4	741.796	388.469	232.214	756.58	302.371	212.907	732.496	216.875	-296.785	702.766	617.482	-271.179	734.217	387.993	-206.774	749.485	396.379	-220.308	759.825	318.858	-199.618	731.865	227.473
53	0.52	3.96615	1132.71	466.697	66.7718	1134.16	507.801	-66.2868	1128.49	504.121	166.024	965.034	584.133	-159.563	970.899	580.691	-1.61779	948.025	545.716	273.068	666.532	603.953	278.761	729.559	376.622	217.411	741.769	388.523	232.235	756.55	302.399	212.931	732.494	216.935	-296.805	702.765	617.502	-271.168	734.194	388.047	-206.77	749.463	396.45	-220.304	759.833	318.894	-199.608	731.866	227.514
54	0.53	3.94491	1132.67	466.859	66.7764	1134.16	507.847	-66.2897	1128.49	504.232	166.034	964.986	584.179	-159.554	970.882	580.748	-1.60579	947.966	545.902	273.083	666.521	603.958	278.748	729.536	376.625	217.395	741.747	388.528	232.227	756.527	302.429	212.915	732.483	216.971	-296.816	702.781	617.547	-271.178	734.161	388.097	-206.795	749.423	396.496	-220.34	759.806	318.933	-199.619	731.844	227.58
55	0.54	3.95036	1132.68	466.914	66.7674	1134.16	507.864	-66.2791	1128.48	504.279	166.052	964.953	584.179	-159.551	970.872	580.753	-1.59935	947.914	545.973	273.103	666.515	603.995	278.723	729.522	376.587	217.385	741.724	388.489	232.212	756.491	302.44	212.914	732.476	216.978	-296.805	702.776	617.506	-271.183	734.146	388.08	-206.799	749.387	396.46	-220.355	759.77	318.888	-199.631	731.82	227.55
56	0.55	3.9812	1132.68	466.993	66.7832	1134.15	507.942	-66.2492	1128.49	504.326	166.097	964.918	584.219	-159.532	970.87	580.769	-1.56287	947.863	546.078	273.119	666.507	604.026	278.728	729.506	376.615	217.42	741.709	388.561	232.241	756.463	302.474	212.928	732.47	216.994	-296.803	702.777	617.496	-271.158	734.138	388.082	-206.768	749.362	396.47	-220.345	759.749	318.885	-199.621	731.813	227.552
57	0.56	3.99966	1132.66	467.103	66.7871	1134.16	508.022	-66.2368	1128.51	504.42	166.132	964.898	584.257	-159.528	970.876	580.796	-1.53781	947.847	546.17	273.123	666.479	604.043	278.738	729.511	376.662	217.419	741.702	388.589	232.242	756.456	302.477	212.934	732.464	217.006	-296.822	702.821	617.548	-271.166	734.141	388.114	-206.794	749.353	396.519	-220.347	759.746	318.91	-199.611	731.807	227.569
58	0.57	3.97827	1132.74	467.067	66.8061	1134.2	508.064	-66.2213	1128.55	504.441	166.138	964.898	584.228	-159.529	970.908	580.776	-1.53003	947.906	546.08	273.134	666.468	604.077	278.723	729.529	376.627	217.393	741.716	388.546	232.235	756.504	302.461	212.907	732.486	216.962	-296.822	702.856	617.588	-271.18	734.167	388.101	-206.816	749.393	396.512	-220.335	759.773	318.922	-199.61	731.833	227.544
59	0.58	3.97673	1132.88	466.918	66.8254	1134.24	508.065	-66.2056	1128.58	504.379	166.151	964.915	584.211	-159.518	970.946	580.741	-1.50928	947.97	545.927	273.134	666.46	604.045	278.715	729.559	376.564	217.393	741.746	388.498	232.216	756.551	302.425	212.894	732.511	216.883	-296.813	702.878	617.561	-271.173	734.203	388.043	-206.791	749.449	396.486	-220.305	759.796	318.881	-199.616	731.873	227.511
60	0.59	3.99055	1132.94	466.857	66.8338	1134.26	508.068	-66.1904	1128.59	504.392	166.171	964.906	584.203	-159.505	970.961	580.745	-1.4877	947.986	545.926	273.149	666.464	604.028	278.721	729.572	376.577	217.401	741.758	388.514	232.235	756.577	302.458	212.921	732.513	216.904	-296.819	702.894	617.54	-271.167	734.225	388.027	-206.774	749.48	396.493	-220.306	759.803	318.868	-199.623	731.887	227.509
61	0.6	3.99091	1132.96	466.901	66.8447	1134.28	508.081	-66.1922	1128.61	504.45	166.181	964.893	584.191	-159.494	970.974	580.755	-1.47584	947.989	545.926	273.179	666.455	604.034	278.72	729.575	376.584	217.4	741.756	388.512	232.226	756.575	302.437	212.911	732.508	216.921	-296.808	702.912	617.537	-271.168	734.245	388.036	-206.771	749.5	396.479	-220.31	759.813	318.873	-199.617	731.882	227.52
62	0.61	3.97172	1132.99	466.863	66.8467	1134.3	508.088	-66.1941	1128.61	504.465	166.206	964.88	584.182	-159.476	970.982	580.738	-1.46263	948.009	545.93	273.193	666.43	604.02	278.716	729.566	376.59	217.378	741.758	388.467	232.206	756.58	302.447	212.897	732.518	216.94	-296.786	702.92	617.533	-271.15	734.25	388.077	-206.758	749.505	396.431	-220.309	759.814	318.885	-199.627	731.884	227.562
63	0.62	3.97303	1132.97	466.932	66.8566	1134.3	508.11	-66.2038	1128.6	504.493	166.228	964.861	584.17	-159.459	970.987	580.707	-1.43813	947.978	545.996	273.217	666.415	604.043	278.737	729.549	376.635	217.409	741.752	388.532	232.201	756.58	302.468	212.909	732.516	216.963	-296.791	702.906	617.516	-271.154	734.23	388.086	-206.753	749.47	396.44	-220.32	759.81	318.891	-199.633	731.887	227.567
64	0.63	3.98153	1132.91	467.077	66.865	1134.29	508.142	-66.2041	1128.56	504.528	166.249	964.841	584.153	-159.433	970.983	580.683	-1.36986	947.93	546.094	273.252	666.431	604.08	278.767	729.529	376.662	217.439	741.726	388.578	232.232	756.543	302.481	212.914	732.502	216.969	-296.807	702.925	617.535	-271.15	734.205	388.062	-206.765	749.423	396.494	-220.301	759.793	318.888	-199.617	731.866	227.551
65	0.64	4.00281	1132.87	467.11	66.858	1134.28	508.117	-66.1782	1128.53	504.528	166.272	964.82	584.12	-159.391	970.985	580.629	-1.30934	947.9	546.143	273.274	666.463	604.089	278.77	729.532	376.646	217.451	741.711	388.53	232.264	756.504	302.452	212.933	732.486	216.947	-296.806	702.948	617.531	-271.121	734.189	388.056	-206.756	749.402	396.502	-220.245	759.777	318.896	-199.581	731.84	227.538
66	0.65	3.98981	1132.86	467.091	66.8525	1134.28	508.1	-66.1819	1128.51	504.551	166.285	964.808	584.085	-159.373	970.998	580.581	-1.28951	947.909	546.155	273.28	666.467	604.079	278.753	729.535	376.624	217.465	741.712	388.537	232.267	756.503	302.44	212.918	732.497	216.927	-296.808	702.979	617.51	-271.108	734.176	388.048	-206.746	749.374	396.509	-220.233	759.805	318.896	-199.567	731.823	227.529
67	0.66	3.92702	1132.87	467.125	66.8171	1134.29	508.075	-66.2168	1128.5	504.561	166.278	964.806	584.083	-159.383	971.019	580.551	-1.31145	947.923	546.192	273.281	666.457	604.087	278.736	729.531	376.617	217.439	741.724	388.545	232.262	756.515	302.465	212.88	732.503	216.925	-296.841	702.996	617.505	-271.131	734.176	388.074	-206.773	749.372	396.53	-220.272	759.792	318.918	-199.598	731.821	227.552
68	0.67	3.88166	1132.86	467.089	66.774	1134.27	508.024	-66.2477	1128.49	504.578	166.279	964.792	584.073	-159.391	971.046	580.534	-1.33955	947.938	546.163	273.279	666.44	604.067	278.714	729.529	376.602	217.415	741.732	388.538	232.225	756.545	302.44	212.862	732.492	216.943	-296.868	703.02	617.51	-271.139	734.189	388.075	-206.772	749.376	396.519	-220.297	759.779	318.939	-199.62	731.829	227.556
69	0.68	3.86664	1132.89	467.02	66.7665	1134.27	508.006	-66.2605	1128.48	504.562	166.314	964.785	584.054	-159.37	971.074	580.504	-1.30475	947.985	546.093	273.281	666.413	604.043	278.733	729.528	376.614	217.422	741.726	388.515	232.208	756.536	302.439	212.871	732.482	216.944	-296.843	703.046	617.492	-271.129	734.215	388.064	-206.743	749.424	396.458	-220.268	759.796	318.894	-199.602	731.856	227.529
70	0.69	3.83206	1132.92	466.956	66.773	1134.27	507.969	-66.267	1128.48	504.546	166.354	964.803	584.055	-159.346	971.114	580.489	-1.25221	948.025	546.106	273.297	666.393	604.052	278.762	729.537	376.624	217.458	741.731	388.567	232.205	756.538	302.443	212.896	732.497	216.935	-296.806	703.082	617.517	-271.13	734.241	388.05	-206.715	749.484	396.445	-220.238	759.827	318.858	-199.59	731.88	227.524
71	0.7	3.8028	1132.95	466.921	66.7719	1134.29	507.918	-66.2885	1128.49	504.517	166.366	964.807	584.019	-159.348	971.152	580.468	-1.24903	948.088	546.041	273.32	666.383	604.056	278.767	729.566	376.62	217.456	741.737	388.551	232.176	756.556	302.398	212.899	732.516	216.928	-296.801	703.111	617.511	-271.127	734.265	388.047	-206.724	749.503	396.463	-220.236	759.854	318.873	-199.589	731.899	227.533
72	0.71	3.7949	1132.96	466.832	66.7638	1134.29	507.857	-66.2914	1128.46	504.47	166.378	964.805	583.943	-159.336	971.176	580.409	-1.22622	948.139	545.92	273.341	666.373	604.043	278.768	729.575	376.599	217.454	741.746	388.494	232.197	756.569	302.431	212.904	732.521	216.904	-296.795	703.139	617.508	-271.115	734.278	388.025	-206.712	749.517	396.439	-220.239	759.843	318.884	-199.585	731.892	227.512
73	0.72	3.80724	1132.93	466.851	66.7742	1134.28	507.815	-66.2942	1128.43	504.472	166.395	964.796	583.913	-159.319	971.177	580.367	-1.19545	948.137	545.923	273.333	666.374	604.053	278.767	729.565	376.601	217.462	741.746	388.5	232.213	756.56	302.44	212.927	732.513	216.937	-296.799	703.154	617.523	-271.112	734.287	388.008	-206.688	749.515	396.405	-220.222	759.846	318.853	-199.569	731.879	227.521
74	0.73	3.77864	1132.84	466.936	66.7378	1134.23	507.765	-66.3135	1128.4	504.512	166.399	964.77	583.917	-159.327	971.168	580.335	-1.18652	948.076	546.051	273.317	666.378	604.074	278.752	729.55	376.611	217.449	741.728	388.542	232.228	756.531	302.476	212.923	732.496	216.965	-296.831	703.182	617.557	-271.128	734.257	388.044	-206.703	749.468	396.424	-220.238	759.833	318.861	-199.564	731.867	227.562
75	0.74	3.7237	1132.77	466.962	66.7049	1134.2	507.711	-66.3447	1128.36	504.509	166.387	964.74	583.853	-159.351	971.16	580.309	-1.22103	948.016	546.082	273.291	666.375	604.066	278.728	729.534	376.616	217.411	741.713	388.505	232.224	756.526	302.455	212.885	732.488	216.963	-296.877	703.184	617.562	-271.139	734.213	388.049	-206.756	749.407	396.464	-220.273	759.8	318.895	-199.585	731.846	227.58
76	0.75	3.70042	1132.7	466.943	66.6837	1134.18	507.621	-66.3691	1128.31	504.461	166.379	964.72	583.78	-159.347	971.164	580.275	-1.23007	947.977	546.076	273.279	666.378	604.017	278.728	729.523	376.594	217.407	741.695	388.494	232.23	756.521	302.425	212.859	732.487	216.924	-296.904	703.172	617.523	-271.135	734.195	388.043	-206.757	749.357	396.462	-220.273	759.772	318.899	-199.595	731.821	227.551
77	0.76	3.69735	1132.64	466.932	66.6659	1134.15	507.545	-66.3596	1128.27	504.412	166.39	964.711	583.756	-159.332	971.153	580.214	-1.22223	947.94	546.07	273.31	666.386	604.043	278.731	729.508	376.586	217.423	741.677	388.506	232.231	756.487	302.399	212.866	732.47	216.931	-296.897	703.17	617.465	-271.124	734.184	388.033	-206.731	749.365	396.441	-220.262	759.756	318.877	-199.577	731.798	227.528
78	0.77	3.69353	1132.63	466.894	66.665	1134.14	507.524	-66.38	1128.25	504.396	166.403	964.721	583.744	-159.336	971.16	580.199	-1.22843	947.968	546.046	273.342	666.387	604.074	278.728	729.521	376.617	217.417	741.686	388.527	232.227	756.499	302.421	212.857	732.475	216.943	-296.872	703.187	617.489	-271.118	734.191	388.047	-206.744	749.393	396.484	-220.267	759.767	318.9	-199.578	731.816	227.553
79	0.78	3.68129	1132.67	466.796	66.6719	1134.14	507.484	-66.4026	1128.26	504.358	166.406	964.747	583.711	-159.333	971.216	580.198	-1.23616	948.08	545.93	273.369	666.37	604.096	278.713	729.554	376.604	217.423	741.726	388.535	232.202	756.549	302.452	212.86	732.506	216.964	-296.853	703.201	617.508	-271.118	734.243	388.034	-206.751	749.463	396.468	-220.255	759.823	318.899	-199.581	731.86	227.548
80	0.79	3.70609	1132.7	466.626	66.6844	1134.13	507.383	-66.3795	1128.24	504.23	166.427	964.77	583.653	-159.303	971.247	580.166	-1.19255	948.176	545.736	273.411	666.372	604.112	278.729	729.562	376.591	217.457	741.747	388.522	232.195	756.582	302.439	212.888	732.519	216.931	-296.825	703.244	617.505	-271.105	734.281	388.002	-206.716	749.508	396.388	-220.208	759.846	318.845	-199.556	731.886	227.511
81	0.8	3.7375	1132.68	466.552	66.6988	1134.1	507.303	-66.3593	1128.22	504.124	166.45	964.769	583.601	-159.278	971.249	580.127	-1.16229	948.216	545.634	273.434	666.382	604.12	278.767	729.565	376.599	217.489	741.736	388.522	232.186	756.588	302.401	212.916	732.505	216.906	-296.813	703.271	617.535	-271.082	734.3	387.979	-206.691	749.513	396.364	-220.174	759.85	318.796	-199.528	731.894	227.5
82	0.81	3.73838	1132.63	466.539	66.7207	1134.09	507.295	-66.3655	1128.19	504.107	166.456	964.776	583.597	-159.283	971.256	580.113	-1.16302	948.201	545.702	273.444	666.405	604.111	278.782	729.566	376.624	217.49	741.737	388.57	232.182	756.583	302.419	212.911	732.504	216.934	-296.85	703.258	617.523	-271.079	734.298	388.007	-206.697	749.518	396.386	-220.183	759.854	318.85	-199.538	731.904	227.532
83	0.82	3.73934	1132.54	466.557	66.7062	1134.08	507.24	-66.3879	1128.15	504.087	166.459	964.785	583.591	-159.309	971.266	580.092	-1.17069	948.191	545.716	273.455	666.446	604.084	278.759	729.575	376.61	217.456	741.739	388.519	232.163	756.577	302.426	212.878	732.504	216.934	-296.893	703.27	617.535	-271.094	734.285	388.03	-206.726	749.489	396.423	-220.195	759.837	318.894	-199.562	731.891	227.541
84	0.83	3.74964	1132.44	466.565	66.6943	1134.05	507.157	-66.3928	1128.1	504.002	166.452	964.778	583.539	-159.322	971.258	580.048	-1.17273	948.146	545.727	273.461	666.475	604.055	278.738	729.562	376.579	217.442	741.729	388.485	232.144	756.554	302.409	212.855	732.503	216.906	-296.934	703.276	617.532	-271.097	734.248	388.014	-206.716	749.442	396.434	-220.223	759.793	318.885	-199.563	731.856	227.529
85	0.84	3.75875	1132.29	466.681	66.694	1134.01	507.127	-66.39	1128.03	503.931	166.443	964.766	583.517	-159.328	971.234	580.009	-1.15833	948.075	545.808	273.457	666.503	604.046	278.738	729.534	376.579	217.449	741.704	388.508	232.168	756.5	302.397	212.846	732.483	216.921	-296.979	703.259	617.484	-271.112	734.226	388.016	-206.738	749.39	396.47	-220.249	759.776	318.862	-199.564	731.827	227.533
86	0.85	3.77014	1132.18	466.744	66.6901	1133.99	507.069	-66.3801	1127.98	503.898	166.45	964.774	583.519	-159.351	971.237	580.021	-1.12904	948.049	545.896	273.471	666.515	604.042	278.747	729.521	376.61	217.446	741.701	388.52	232.206	756.466	302.401	212.845	732.467	216.948	-297.004	703.26	617.46	-271.129	734.211	388.04	-206.781	749.362	396.514	-220.256	759.78	318.893	-199.563	731.808	227.57
87	0.86	3.77837	1132.17	466.642	66.6861	1133.98	507.001	-66.3717	1127.95	503.826	166.461	964.779	583.5	-159.351	971.259	579.989	-1.11898	948.072	545.845	273.514	666.533	604.069	278.739	729.523	376.598	217.427	741.704	388.466	232.19	756.479	302.403	212.856	732.463	216.954	-296.991	703.272	617.45	-271.114	734.21	388.019	-206.763	749.374	396.466	-220.256	759.782	318.906	-199.553	731.813	227.55
88	0.87	3.79873	1132.16	466.553	66.7037	1133.96	506.972	-66.3583	1127.93	503.776	166.487	964.802	583.484	-159.326	971.281	579.94	-1.12867	948.145	545.717	273.579	666.552	604.118	278.752	729.53	376.595	217.443	741.711	388.47	232.183	756.513	302.437	212.853	732.476	216.936	-296.967	703.305	617.455	-271.107	734.235	387.966	-206.736	749.402	396.409	-220.243	759.797	318.865	-199.557	731.837	227.548
89	0.88	3.80029	1132.16	466.457	66.7303	1133.96	506.95	-66.3531	1127.92	503.736	166.506	964.828	583.477	-159.318	971.307	579.913	-1.12751	948.231	545.623	273.652	666.559	604.125	278.769	729.532	376.599	217.502	741.742	388.575	232.176	756.54	302.417	212.862	732.492	216.936	-296.952	703.332	617.468	-271.117	734.262	387.987	-206.733	749.458	396.428	-220.232	759.817	318.858	-199.567	731.864	227.567
90	0.89	3.82965	1132.19	466.347	66.7413	1133.95	506.896	-66.3432	1127.93	503.656	166.529	964.846	583.47	-159.307	971.336	579.896	-1.10602	948.29	545.541	273.696	666.564	604.134	278.774	729.547	376.61	217.523	741.757	388.567	232.168	756.551	302.41	212.865	732.508	216.908	-296.94	703.357	617.469	-271.111	734.291	388.005	-206.737	749.504	396.447	-220.212	759.841	318.859	-199.565	731.888	227.531
91	0.9	3.85097	1132.21	466.182	66.7437	1133.93	506.832	-66.3277	1127.91	503.555	166.536	964.857	583.45	-159.297	971.351	579.846	-1.09109	948.349	545.418	273.708	666.594	604.159	278.755	729.56	376.573	217.506	741.77	388.492	232.169	756.582	302.386	212.853	732.511	216.871	-296.946	703.376	617.48	-271.103	734.298	387.986	-206.734	749.505	396.424	-220.201	759.834	318.84	-199.55	731.888	227.495
92	0.91	3.86602	1132.19	466.095	66.7497	1133.92	506.818	-66.3148	1127.88	503.533	166.549	964.87	583.475	-159.298	971.357	579.825	-1.08065	948.371	545.385	273.719	666.622	604.168	278.761	729.561	376.561	217.504	741.763	388.491	232.183	756.606	302.397	212.832	732.508	216.88	-296.981	703.38	617.479	-271.112	734.296	387.973	-206.743	749.485	396.437	-220.19	759.818	318.852	-199.545	731.874	227.497
93	0.92	3.86785	1132.1	466.177	66.7461	1133.89	506.78	-66.3067	1127.84	503.51	166.554	964.877	583.46	-159.3	971.351	579.821	-1.07615	948.327	545.428	273.717	666.647	604.174	278.755	729.559	376.543	217.506	741.752	388.517	232.179	756.588	302.396	212.818	732.505	216.877	-297.006	703.412	617.529	-271.109	734.277	387.981	-206.758	749.48	396.453	-220.199	759.79	318.88	-199.542	731.859	227.526
94	0.93	3.89929	1132.03	466.199	66.7595	1133.88	506.751	-66.2948	1127.81	503.48	166.55	964.885	583.413	-159.294	971.354	579.817	-1.06266	948.276	545.469	273.724	666.682	604.169	278.769	729.55	376.548	217.502	741.755	388.5	232.179	756.555	302.406	212.825	732.515	216.869	-297.01	703.434	617.539	-271.098	734.277	388.004	-206.726	749.463	396.431	-220.2	759.792	318.865	-199.53	731.854	227.533
95	0.94	3.92735	1132.01	466.212	66.7752	1133.87	506.755	-66.2992	1127.8	503.437	166.557	964.893	583.399	-159.296	971.366	579.818	-1.04597	948.266	545.515	273.732	666.689	604.161	278.783	729.546	376.58	217.511	741.747	388.513	232.193	756.527	302.455	212.833	732.512	216.919	-297.014	703.431	617.512	-271.091	734.279	388.013	-206.713	749.443	396.417	-220.207	759.802	318.887	-199.529	731.846	227.573
96	0.95	3.9329	1131.97	466.226	66.7936	1133.85	506.741	-66.293	1127.76	503.429	166.576	964.899	583.396	-159.276	971.352	579.798	-1.02393	948.25	545.492	273.749	666.667	604.15	278.795	729.55	376.604	217.518	741.738	388.538	232.217	756.512	302.457	212.847	732.491	216.949	-297.024	703.447	617.526	-271.088	734.276	388.006	-206.718	749.425	396.44	-220.205	759.811	318.89	-199.529	731.835	227.567
97	0.96	3.99684	1131.94	466.176	66.8337	1133.82	506.719	-66.2585	1127.71	503.384	166.611	964.869	583.35	-159.232	971.328	579.748	-0.96831	948.205	545.47	273.78	666.648	604.135	278.823	729.534	376.622	217.547	741.718	388.522	232.271	756.472	302.462	212.895	732.471	216.969	-297.017	703.449	617.534	-271.061	734.249	387.962	-206.678	749.398	396.421	-220.167	759.813	318.84	-199.501	731.814	227.516
98	0.97	4.03711	1131.9	466.132	66.8596	1133.8	506.701	-66.2243	1127.68	503.344	166.655	964.851	583.309	-159.198	971.323	579.689	-0.92415	948.184	545.452	273.808	666.654	604.165	278.844	729.515	376.624	217.593	741.713	388.536	232.289	756.451	302.442	212.927	732.467	216.972	-296.985	703.443	617.481	-271.044	734.26	387.939	-206.662	749.402	396.417	-220.131	759.802	318.811	-199.469	731.801	227.508
99	0.98	3.9778	1131.89	466.155	66.8311	1133.79	506.668	-66.2552	1127.68	503.383	166.648	964.851	583.311	-159.237	971.345	579.713	-0.97415	948.187	545.47	273.81	666.662	604.155	278.802	729.512	376.616	217.571	741.721	388.566	232.228	756.485	302.442	212.889	732.472	216.971	-296.999	703.451	617.465	-271.088	734.272	387.98	-206.702	749.406	396.459	-220.18	759.778	318.852	-199.506	731.819	227.522
100	0.99	3.89475	1131.9	466.143	66.7937	1133.79	506.63	-66.3166	1127.69	503.359	166.603	964.852	583.285	-159.292	971.381	579.718	-1.04912	948.232	545.431	273.797	666.649	604.131	278.743	729.531	376.589	217.502	741.741	388.538	232.132	756.544	302.429	212.826	732.477	216.957	-297.028	703.465	617.483	-271.13	734.284	388.001	-206.758	749.438	396.487	-220.219	759.757	318.904	-199.546	731.843	227.536
101	1	3.88104	1131.96	465.951	66.7765	1133.79	506.528	-66.3197	1127.69	503.303	166.593	964.879	583.235	-159.298	971.419	579.666	-1.06578	948.317	545.225	273.789	666.652	604.117	278.724	729.556	376.553	217.48	741.769	388.496	232.111	756.579	302.363	212.798	732.503	216.898	-297.037	703.464	617.472	-271.132	734.318	387.975	-206.763	749.461	396.434	-220.21	759.766	318.878	-199.547	731.843	227.525
102	1.01	3.93846	1131.99	465.849	66.7962	1133.8	506.485	-66.2854	1127.7	503.261	166.615	964.907	583.213	-159.275	971.441	579.641	-1.03481	948.368	545.125	273.807	666.667	604.123	278.738	729.579	376.531	217.498	741.788	388.488	232.143	756.574	302.378	212.797	732.527	216.849	-297.046	703.5	617.462	-271.121	734.335	387.956	-206.726	749.513	396.416	-220.183	759.783	318.828	-199.534	731.848	227.514
103	1.02	3.97289	1132	465.817	66.8182	1133.82	506.461	-66.2731	1127.71	503.24	166.631	964.924	583.188	-159.257	971.461	579.642	-0.99038	948.381	545.13	273.825	666.728	604.181	278.744	729.593	376.507	217.513	741.803	388.477	232.169	756.583	302.392	212.81	732.534	216.83	-297.072	703.592	617.544	-271.127	734.333	387.972	-206.738	749.515	396.432	-220.177	759.804	318.816	-199.527	731.862	227.532
104	1.03	4.01085	1131.98	465.8	66.8364	1133.83	506.413	-66.2473	1127.7	503.229	166.666	964.94	583.162	-159.234	971.465	579.599	-0.93887	948.38	545.133	273.843	666.76	604.186	278.761	729.617	376.487	217.537	741.824	388.48	232.181	756.582	302.357	212.825	732.543	216.825	-297.076	703.657	617.596	-271.113	734.326	387.952	-206.748	749.517	396.421	-220.159	759.813	318.804	-199.509	731.856	227.528
105	1.04	4.05641	1131.92	465.83	66.8734	1133.8	506.411	-66.2034	1127.66	503.194	166.715	964.943	583.139	-159.197	971.462	579.559	-0.89893	948.322	545.159	273.869	666.756	604.187	278.785	729.592	376.488	217.549	741.813	388.457	232.181	756.523	302.323	212.823	732.534	216.836	-297.062	703.669	617.548	-271.082	734.309	387.923	-206.707	749.52	396.393	-220.14	759.808	318.81	-199.476	731.829	227.529
106	1.05	4.0745	1131.83	466.002	66.8838	1133.76	506.468	-66.1851	1127.6	503.214	166.735	964.93	583.151	-159.183	971.443	579.587	-0.8867	948.242	545.284	273.914	666.769	604.233	278.804	729.551	376.534	217.559	741.78	388.477	232.215	756.463	302.405	212.833	732.491	216.899	-297.081	703.675	617.54	-271.089	734.273	387.968	-206.706	749.459	396.437	-220.181	759.799	318.84	-199.479	731.797	227.588
107	1.06	4.07429	1131.76	466.123	66.8964	1133.72	506.542	-66.1786	1127.55	503.25	166.744	964.925	583.191	-159.186	971.445	579.62	-0.88464	948.2	545.432	273.945	666.772	604.23	278.808	729.527	376.595	217.557	741.76	388.522	232.216	756.45	302.448	212.85	732.459	216.964	-297.104	703.648	617.499	-271.106	734.259	388.028	-206.739	749.398	396.513	-220.223	759.784	318.861	-199.501	731.778	227.615
108	1.07	4.09546	1131.74	466.044	66.9208	1133.7	506.517	-66.1655	1127.55	503.208	166.763	964.913	583.133	-159.176	971.467	579.584	-0.8811	948.231	545.386	273.977	666.783	604.215	278.815	729.523	376.571	217.578	741.76	388.512	232.211	756.461	302.4	212.865	732.453	216.946	-297.114	703.624	617.452	-271.095	734.268	387.962	-206.724	749.402	396.459	-220.212	759.768	318.839	-199.5	731.778	227.546
109	1.08	4.15627	1131.76	465.951	66.9654	1133.69	506.494	-66.138	1127.57	503.145	166.797	964.92	583.081	-159.142	971.489	579.523	-0.86632	948.258	545.279	274.006	666.789	604.201	278.833	729.532	376.516	217.624	741.771	388.502	232.247	756.466	302.335	212.868	732.448	216.894	-297.112	703.657	617.466	-271.088	734.273	387.912	-206.718	749.44	396.379	-220.157	759.765	318.819	-199.483	731.786	227.496
110	1.09	4.19868	1131.78	465.991	66.9829	1133.7	506.505	-66.1238	1127.6	503.201	166.816	964.949	583.112	-159.126	971.525	579.543	-0.85952	948.31	545.24	274.029	666.821	604.209	278.841	729.541	376.504	217.641	741.8	388.526	232.251	756.478	302.344	212.861	732.457	216.87	-297.133	703.724	617.542	-271.104	734.302	387.97	-206.654	749.401	396.285	-220.269	759.398	318.596	-199.492	731.808	227.489
111	1.1	4.21071	1131.86	465.943	66.9857	1133.74	506.502	-66.1141	1127.63	503.23	166.811	964.991	583.132	-159.143	971.578	579.559	-0.8618	948.44	545.112	274.032	666.847	604.232	278.82	729.586	376.507	217.628	741.84	388.521	232.213	756.538	302.37	212.837	732.495	216.861	-297.144	703.774	617.551	-271.122	734.361	387.961	-206.472	749.319	396.009	-220.561	758.562	318.04	-199.505	731.861	227.501
112	1.11	4.22908	1131.96	465.797	67.0063	1133.77	506.461	-66.0959	1127.67	503.206	166.815	965.03	583.114	-159.155	971.624	579.552	-0.87404	948.559	544.918	274.025	666.841	604.223	278.798	729.634	376.468	217.594	741.885	388.468	232.158	756.582	302.339	212.821	732.549	216.824	-297.142	703.818	617.542	-271.113	734.403	387.885	-206.505	749.403	396.014	-220.495	758.764	318.15	-199.502	731.907	227.481
113	1.12	4.28135	1131.97	465.789	67.0341	1133.78	506.446	-66.0541	1127.7	503.229	166.833	965.053	583.115	-159.138	971.639	579.531	-0.86235	948.562	544.894	274.024	666.851	604.196	278.795	729.643	376.447	217.59	741.892	388.464	232.172	756.567	302.328	212.81	732.572	216.802	-297.163	703.88	617.592	-271.09	734.407	387.885	-206.63	749.556	396.268	-220.22	759.581	318.691	-199.501	731.911	227.475
114	1.13	4.33626	1131.95	465.877	67.0723	1133.76	506.502	-65.9952	1127.7	503.29	166.848	965.042	583.152	-159.119	971.637	579.543	-0.82665	948.482	545.066	274.041	666.865	604.222	278.822	729.624	376.487	217.602	741.873	388.49	232.211	756.524	302.353	212.823	732.537	216.832	-297.183	703.913	617.605	-271.082	734.382	387.923	-206.684	749.576	396.372	-220.157	759.77	318.8	-199.506	731.877	227.498
115	1.14	4.38758	1131.92	465.925	67.0941	1133.74	506.562	-65.9526	1127.68	503.327	166.864	965.014	583.163	-159.109	971.619	579.555	-0.81632	948.418	545.112	274.058	666.863	604.229	278.835	729.595	376.513	217.6	741.848	388.484	232.231	756.471	302.38	212.821	732.51	216.857	-297.182	703.885	617.546	-271.097	734.343	387.931	-206.692	749.532	396.384	-220.162	759.801	318.797	-199.504	731.828	227.49
116	1.15	4.43097	1131.83	466.07	67.1317	1133.72	506.622	-65.9273	1127.66	503.367	166.876	964.98	583.17	-159.104	971.597	579.548	-0.8104	948.346	545.2	274.092	666.849	604.221	278.827	729.548	376.487	217.597	741.806	388.463	232.236	756.414	302.368	212.816	732.48	216.847	-297.181	703.852	617.512	-271.118	734.298	387.929	-206.697	749.462	396.342	-220.192	759.782	318.807	-199.496	731.79	227.501
117	1.16	4.45425	1131.72	466.326	67.1641	1133.7	506.675	-65.8855	1127.65	503.467	166.893	964.959	583.214	-159.098	971.57	579.587	-0.80616	948.26	545.403	274.129	666.866	604.255	278.827	729.509	376.514	217.612	741.762	388.498	232.255	756.375	302.378	212.837	732.443	216.911	-297.194	703.831	617.491	-271.122	734.266	387.954	-206.707	749.39	396.398	-220.224	759.753	318.843	-199.488	731.75	227.563
118	1.17	4.4872	1131.74	466.356	67.1934	1133.69	506.735	-65.8341	1127.67	503.534	166.918	964.951	583.226	-159.085	971.581	579.599	-0.79941	948.233	545.444	274.138	666.878	604.289	278.833	729.488	376.552	217.619	741.746	388.514	232.256	756.385	302.373	212.862	732.431	216.971	-297.203	703.84	617.49	-271.113	734.261	387.941	-206.717	749.372	396.411	-220.223	759.754	318.858	-199.478	731.742	227.567
119	1.18	4.52233	1131.87	466.195	67.2134	1133.71	506.748	-65.8003	1127.73	503.539	166.941	964.983	583.22	-159.067	971.635	579.594	-0.77849	948.328	545.296	274.135	666.878	604.312	278.833	729.511	376.525	217.624	741.789	388.486	232.253	756.439	302.364	212.841	732.456	216.901	-297.19	703.882	617.498	-271.091	734.285	387.913	-206.715	749.44	396.356	-220.182	759.778	318.807	-199.475	731.77	227.511
120	1.19	4.50655	1132.01	466.039	67.2221	1133.76	506.749	-65.8048	1127.81	503.571	166.939	965.019	583.223	-159.073	971.7	579.593	-0.79958	948.477	545.112	274.117	666.873	604.3	278.813	729.564	376.478	217.611	741.843	388.453	232.239	756.542	302.351	212.81	732.487	216.828	-297.201	703.946	617.52	-271.089	734.337	387.908	-206.739	749.519	396.349	-220.151	759.799	318.836	-199.498	731.819	227.488
121	1.2	4.49367	1132.15	465.915	67.2395	1133.81	506.761	-65.7999	1127.89	503.619	166.946	965.058	583.228	-159.075	971.763	579.586	-0.83413	948.613	544.945	274.093	666.869	604.26	278.79	729.631	376.436	217.586	741.879	388.423	232.195	756.62	302.305	212.786	732.539	216.78	-297.234	704.035	617.6	-271.117	734.399	387.91	-206.764	749.574	396.341	-220.136	759.818	318.839	-199.506	731.859	227.487
122	1.21	4.51439	1132.24	465.854	67.261	1133.86	506.757	-65.7719	1127.93	503.666	166.966	965.071	583.248	-159.064	971.809	579.57	-0.82638	948.676	544.896	274.075	666.864	604.241	278.773	729.654	376.408	217.568	741.891	388.387	232.148	756.637	302.281	212.768	732.566	216.744	-297.239	704.079	617.592	-271.124	734.449	387.889	-206.743	749.613	396.315	-220.128	759.828	318.789	-199.527	731.887	227.465
123	1.22	4.5174	1132.25	465.918	67.2701	1133.88	506.832	-65.7496	1127.94	503.701	166.989	965.065	583.274	-159.056	971.833	579.606	-0.76738	948.66	544.999	274.069	666.847	604.219	278.784	729.641	376.44	217.594	741.882	388.445	232.132	756.633	302.321	212.778	732.564	216.795	-297.254	704.11	617.565	-271.114	734.451	387.913	-206.637	749.554	396.218	-220.258	759.45	318.533	-199.52	731.892	227.469
124	1.23	4.53477	1132.19	466.113	67.2923	1133.88	506.91	-65.722	1127.94	503.824	167.014	965.054	583.331	-159.044	971.845	579.683	-0.72471	948.565	545.186	274.076	666.831	604.215	278.809	729.606	376.459	217.611	741.863	388.513	232.17	756.587	302.364	212.796	732.525	216.872	-297.277	704.127	617.543	-271.114	734.416	387.945	-206.539	749.433	396.128	-220.434	758.968	318.292	-199.509	731.86	227.512
125	1.24	4.582	1132.12	466.311	67.3204	1133.86	506.931	-65.673	1127.92	503.891	167.063	965.006	583.321	-159.002	971.819	579.658	-0.67174	948.451	545.317	274.106	666.816	604.211	278.843	729.549	376.482	217.663	741.823	388.531	232.241	756.482	302.348	212.843	732.482	216.905	-297.276	704.159	617.564	-271.095	734.358	387.921	-206.641	749.476	396.341	-220.215	759.612	318.736	-199.479	731.819	227.502
126	1.25	4.6323	1132.09	466.377	67.36	1133.84	506.981	-65.6285	1127.89	503.905	167.114	964.967	583.293	-158.952	971.783	579.618	-0.62368	948.368	545.35	274.136	666.777	604.186	278.876	729.512	376.495	217.697	741.784	388.494	232.278	756.397	302.344	212.882	732.447	216.912	-297.282	704.184	617.588	-271.06	734.315	387.899	-206.637	749.47	396.345	-220.136	759.758	318.794	-199.448	731.778	227.475
127	1.26	4.6231	1132.11	466.472	67.3716	1133.86	507.065	-65.6227	1127.91	503.994	167.13	964.957	583.338	-158.941	971.791	579.619	-0.60755	948.357	545.367	274.151	666.768	604.216	278.872	729.512	376.529	217.681	741.765	388.493	232.298	756.384	302.38	212.883	732.42	216.936	-297.303	704.2	617.583	-271.065	734.314	387.943	-206.595	749.391	396.242	-220.249	759.398	318.569	-199.448	731.765	227.504
128	1.27	4.56103	1132.16	466.523	67.3336	1133.91	507.076	-65.6584	1127.95	504.057	167.113	964.966	583.35	-158.951	971.825	579.656	-0.64822	948.408	545.352	274.142	666.75	604.209	278.855	729.512	376.534	217.654	741.772	388.52	232.278	756.433	302.422	212.845	732.427	216.94	-297.327	704.202	617.564	-271.1	734.321	387.972	-206.544	749.316	396.155	-220.437	758.904	318.297	-199.485	731.763	227.553
129	1.28	4.49623	1132.27	466.416	67.2963	1133.94	507.027	-65.6862	1128	504.067	167.108	964.974	583.305	-158.957	971.87	579.662	-0.67816	948.461	545.299	274.148	666.754	604.203	278.835	729.522	376.497	217.639	741.791	388.503	232.223	756.489	302.364	212.817	732.454	216.88	-297.332	704.233	617.554	-271.117	734.352	387.94	-206.691	749.467	396.336	-220.254	759.555	318.712	-199.501	731.775	227.529
130	1.29	4.45873	1132.37	466.322	67.2911	1133.97	506.995	-65.6991	1128.04	504.085	167.119	964.984	583.273	-158.959	971.894	579.604	-0.70034	948.532	545.144	274.139	666.772	604.224	278.817	729.538	376.479	217.62	741.806	388.468	232.175	756.515	302.342	212.798	732.473	216.803	-297.346	704.281	617.563	-271.12	734.393	387.9	-206.731	749.529	396.363	-220.189	759.728	318.758	-199.495	731.802	227.496
131	1.3	4.40642	1132.46	466.273	67.2501	1134.02	506.975	-65.727	1128.09	504.12	167.105	965.011	583.294	-158.974	971.93	579.606	-0.7283	948.592	545.092	274.128	666.787	604.211	278.773	729.573	376.464	217.59	741.836	388.465	232.149	756.552	302.359	212.765	732.498	216.788	-297.375	704.337	617.61	-271.13	734.413	387.918	-206.767	749.575	396.377	-220.189	759.776	318.796	-199.51	731.831	227.506
132	1.31	4.34781	1132.55	466.235	67.2155	1134.08	506.984	-65.7466	1128.12	504.141	167.094	965.037	583.294	-158.982	971.971	579.609	-0.74987	948.693	544.995	274.129	666.805	604.219	278.749	729.616	376.436	217.564	741.87	388.434	232.111	756.608	302.317	212.708	732.542	216.748	-297.389	704.365	617.598	-271.144	734.435	387.937	-206.784	749.611	396.342	-220.195	759.797	318.831	-199.535	731.859	227.508
133	1.32	4.37072	1132.59	466.222	67.222	1134.09	506.983	-65.7414	1128.15	504.141	167.124	965.041	583.267	-158.96	971.977	579.556	-0.71335	948.723	544.956	274.143	666.795	604.217	278.769	729.616	376.413	217.553	741.873	388.37	232.119	756.608	302.282	212.717	732.546	216.71	-297.389	704.373	617.557	-271.126	734.443	387.919	-206.747	749.61	396.3	-220.179	759.807	318.814	-199.524	731.867	227.461
134	1.33	4.40907	1132.55	466.283	67.2468	1134.09	506.992	-65.7191	1128.12	504.152	167.154	965.028	583.226	-158.923	971.959	579.535	-0.65626	948.654	545.043	274.158	666.803	604.215	278.809	729.588	376.43	217.604	741.845	388.403	232.182	756.564	302.299	212.773	732.522	216.739	-297.389	704.389	617.557	-271.121	734.426	387.905	-206.644	749.526	396.176	-220.29	759.413	318.535	-199.493	731.842	227.467
135	1.34	4.42417	1132.47	466.491	67.2937	1134.07	507.109	-65.7072	1128.08	504.192	167.168	965.016	583.234	-158.895	971.938	579.572	-0.59417	948.565	545.196	274.181	666.818	604.254	278.847	729.561	376.494	217.663	741.81	388.475	232.24	756.495	302.347	212.823	732.489	216.841	-297.391	704.41	617.583	-271.1	734.382	387.878	-206.542	749.402	396.062	-220.438	758.924	318.235	-199.46	731.808	227.49
136	1.35	4.4362	1132.41	466.614	67.3084	1134.06	507.154	-65.7102	1128.05	504.232	167.177	965	583.211	-158.878	971.919	579.576	-0.57011	948.533	545.257	274.209	666.822	604.273	278.88	729.521	376.518	217.699	741.78	388.49	232.275	756.449	302.388	212.858	732.465	216.911	-297.37	704.401	617.556	-271.096	734.351	387.875	-206.605	749.401	396.169	-220.351	759.187	318.427	-199.457	731.783	227.502
137	1.36	4.4273	1132.37	466.654	67.2814	1134.06	507.116	-65.7147	1128.03	504.254	167.185	964.986	583.204	-158.873	971.912	579.575	-0.56019	948.524	545.273	274.228	666.825	604.266	278.881	729.498	376.512	217.716	741.76	388.469	232.278	756.42	302.382	212.875	732.458	216.926	-297.363	704.402	617.559	-271.099	734.326	387.888	-206.457	749.296	395.966	-220.577	758.474	317.946	-199.454	731.762	227.505
138	1.37	4.39878	1132.37	466.702	67.2585	1134.05	507.126	-65.727	1128.03	504.287	167.183	964.983	583.233	-158.884	971.923	579.594	-0.57624	948.517	545.319	274.24	666.832	604.269	278.872	729.494	376.528	217.703	741.759	388.488	232.241	756.426	302.421	212.858	732.45	216.912	-297.382	704.411	617.588	-271.107	734.324	387.916	-206.513	749.334	396.075	-220.523	758.679	318.101	-199.469	731.761	227.541
139	1.38	4.351	1132.44	466.634	67.2329	1134.07	507.168	-65.7579	1128.05	504.291	167.169	965.015	583.255	-158.907	971.954	579.621	-0.61438	948.559	545.315	274.229	666.842	604.264	278.857	729.52	376.545	217.678	741.782	388.511	232.214	756.48	302.447	212.827	732.46	216.897	-297.395	704.424	617.591	-271.129	734.358	387.925	-206.685	749.503	396.351	-220.273	759.508	318.676	-199.487	731.786	227.542
140	1.39	4.31602	1132.54	466.43	67.2083	1134.1	507.113	-65.7853	1128.1	504.272	167.152	965.05	583.215	-158.939	972.002	579.629	-0.66035	948.708	545.092	274.214	666.873	604.273	278.836	729.569	376.494	217.649	741.817	388.46	232.176	756.544	302.391	212.777	732.513	216.807	-297.406	704.439	617.567	-271.127	734.41	387.895	-206.726	749.591	396.358	-220.196	759.731	318.802	-199.503	731.822	227.482
141	1.4	4.27794	1132.62	466.264	67.1826	1134.11	507.058	-65.8028	1128.13	504.214	167.147	965.069	583.184	-158.967	972.03	579.598	-0.6887	948.829	544.89	274.212	666.876	604.253	278.808	729.589	376.449	217.61	741.844	388.395	232.147	756.598	302.291	212.755	732.548	216.744	-297.414	704.461	617.583	-271.134	734.446	387.869	-206.74	749.64	396.35	-220.156	759.79	318.82	-199.499	731.841	227.448
142	1.41	4.25601	1132.63	466.253	67.1736	1134.1	507.039	-65.8138	1128.12	504.215	167.153	965.083	583.196	-158.965	972.036	579.573	-0.69078	948.837	544.885	274.218	666.879	604.259	278.791	729.584	376.434	217.617	741.845	388.408	232.167	756.591	302.303	212.761	732.548	216.74	-297.432	704.471	617.638	-271.134	734.446	387.889	-206.759	749.636	396.382	-220.144	759.801	318.851	-199.492	731.84	227.456
143	1.42	4.24579	1132.6	466.296	67.1505	1134.08	507.064	-65.8251	1128.09	504.214	167.147	965.077	583.196	-158.963	972.015	579.577	-0.69631	948.806	544.91	274.223	666.882	604.291	278.804	729.578	376.456	217.643	741.823	388.461	232.175	756.553	302.326	212.762	732.528	216.765	-297.436	704.468	617.662	-271.149	734.43	387.929	-206.759	749.639	396.371	-220.148	759.793	318.84	-199.485	731.828	227.474
144	1.43	4.20706	1132.56	466.332	67.1263	1134.03	507.052	-65.8456	1128.06	504.2	167.128	965.064	583.199	-158.98	971.996	579.589	-0.69447	948.733	544.962	274.23	666.874	604.281	278.814	729.556	376.477	217.646	741.796	388.482	232.16	756.527	302.337	212.759	732.5	216.803	-297.424	704.431	617.615	-271.146	734.407	387.916	-206.768	749.611	396.325	-220.189	759.791	318.811	-199.501	731.818	227.487
145	1.44	4.18639	1132.45	466.486	67.1137	1134.01	507.067	-65.8809	1128.01	504.215	167.116	965.057	583.204	-158.998	971.976	579.611	-0.69845	948.65	545.085	274.246	666.883	604.276	278.826	729.519	376.506	217.635	741.766	388.469	232.155	756.493	302.342	212.778	732.462	216.855	-297.433	704.39	617.587	-271.148	734.362	387.908	-206.783	749.57	396.355	-220.227	759.774	318.816	-199.503	731.784	227.522
146	1.45	4.18239	1132.33	466.653	67.1008	1133.98	507.06	-65.8964	1127.94	504.251	167.101	965.053	583.204	-159	971.943	579.614	-0.6934	948.567	545.191	274.25	666.897	604.287	278.848	729.491	376.528	217.658	741.745	388.507	232.16	756.42	302.315	212.807	732.431	216.906	-297.449	704.372	617.571	-271.148	734.321	387.916	-206.698	749.458	396.31	-220.348	759.363	318.567	-199.49	731.754	227.548
147	1.46	4.19683	1132.29	466.606	67.0941	1133.98	507.029	-65.8986	1127.9	504.203	167.099	965.056	583.181	-158.994	971.917	579.578	-0.67126	948.542	545.169	274.237	666.941	604.312	278.847	729.485	376.505	217.66	741.736	388.476	232.193	756.38	302.304	212.823	732.421	216.887	-297.443	704.367	617.543	-271.12	734.312	387.909	-206.57	749.369	396.126	-220.474	758.893	318.234	-199.473	731.743	227.504
148	1.47	4.17831	1132.32	466.551	67.0798	1134	507.045	-65.9207	1127.91	504.142	167.094	965.083	583.177	-159.017	971.932	579.577	-0.66879	948.567	545.162	274.213	666.96	604.307	278.853	729.511	376.507	217.652	741.758	388.453	232.229	756.427	302.39	212.829	732.457	216.878	-297.458	704.386	617.555	-271.133	734.359	387.905	-206.61	749.454	396.191	-220.38	759.188	318.391	-199.467	731.761	227.506
149	1.48	4.09728	1132.4	466.505	67.0333	1134.04	507.002	-65.9756	1127.95	504.123	167.067	965.141	583.184	-159.052	971.968	579.61	-0.71205	948.669	545.078	274.188	666.973	604.29	278.831	729.554	376.487	217.636	741.812	388.492	232.208	756.517	302.407	212.801	732.506	216.868	-297.5	704.403	617.575	-271.161	734.393	387.944	-206.503	749.382	395.994	-220.601	758.507	317.969	-199.494	731.812	227.526
150	1.49	4.04789	1132.49	466.352	66.9944	1134.08	506.914	-66.0165	1127.99	504.076	167.044	965.169	583.119	-159.06	971.998	579.588	-0.74475	948.772	544.87	274.176	666.998	604.291	278.81	729.595	376.436	217.635	741.854	388.459	232.181	756.595	302.34	212.772	732.536	216.793	-297.514	704.419	617.573	-271.153	734.421	387.911	-206.546	749.447	396.015	-220.507	758.726	318.106	-199.488	731.848	227.48
151	1.5	4.0518	1132.53	466.225	66.9739	1134.08	506.864	-66.0284	1128	504.017	167.051	965.183	583.099	-159.059	972.02	579.572	-0.73461	948.833	544.717	274.177	667.015	604.283	278.818	729.618	376.412	217.648	741.876	388.432	232.183	756.61	302.307	212.777	732.559	216.761	-297.521	704.434	617.555	-271.127	734.448	387.876	-206.696	749.617	396.247	-220.22	759.565	318.589	-199.464	731.857	227.429
152	1.51	4.02673	1132.51	466.264	66.9542	1134.07	506.902	-66.0524	1127.99	504.042	167.035	965.202	583.136	-159.074	972.012	579.586	-0.769	948.853	544.745	274.186	667.032	604.303	278.813	729.623	376.441	217.656	741.878	388.459	232.175	756.626	302.289	212.782	732.544	216.788	-297.542	704.413	617.568	-271.135	734.445	387.928	-206.678	749.595	396.224	-220.289	759.382	318.492	-199.471	731.86	227.467
153	1.52	3.9562	1132.47	466.36	66.9045	1134.04	506.905	-66.1161	1127.97	504.052	166.997	965.208	583.154	-159.095	971.976	579.609	-0.84261	948.83	544.766	274.226	667.033	604.309	278.798	729.602	376.433	217.647	741.854	388.455	232.159	756.619	302.262	212.775	732.52	216.8	-297.566	704.358	617.565	-271.169	734.418	387.927	-206.627	749.48	396.119	-220.448	758.907	318.266	-199.505	731.841	227.515
154	1.53	3.92132	1132.41	466.381	66.8913	1134	506.905	-66.145	1127.92	504.021	166.978	965.173	583.107	-159.095	971.922	579.576	-0.85706	948.745	544.785	274.261	667.045	604.355	278.804	729.562	376.432	217.648	741.81	388.45	232.126	756.556	302.249	212.79	732.479	216.819	-297.55	704.304	617.507	-271.166	734.376	387.898	-206.686	749.478	396.193	-220.365	759.161	318.438	-199.494	731.796	227.486
155	1.54	3.91214	1132.31	466.507	66.8983	1133.99	506.949	-66.1682	1127.87	504.024	166.979	965.162	583.094	-159.088	971.884	579.563	-0.80742	948.622	544.944	274.275	667.067	604.383	278.834	729.526	376.494	217.685	741.782	388.481	232.135	756.492	302.323	212.831	732.455	216.891	-297.536	704.281	617.471	-271.152	734.345	387.909	-206.587	749.394	396.073	-220.489	758.849	318.184	-199.463	731.766	227.514
156	1.55	3.87491	1132.26	466.643	66.8792	1134.01	506.993	-66.2106	1127.86	504.045	166.968	965.187	583.117	-159.109	971.885	579.617	-0.81332	948.586	545.007	274.273	667.101	604.372	278.852	729.531	376.525	217.677	741.779	388.494	232.177	756.46	302.392	212.83	732.466	216.921	-297.55	704.309	617.528	-271.161	734.325	387.919	-206.665	749.433	396.225	-220.437	759.168	318.409	-199.474	731.753	227.564
157	1.56	3.86797	1132.3	466.578	66.8368	1134.04	506.908	-66.2368	1127.85	503.937	166.96	965.209	583.064	-159.13	971.863	579.585	-0.8243	948.604	544.913	274.263	667.111	604.34	278.867	729.55	376.494	217.661	741.777	388.438	232.19	756.435	302.362	212.837	732.482	216.881	-297.568	704.344	617.584	-271.138	734.317	387.896	-206.596	749.396	396.127	-220.526	758.867	318.237	-199.463	731.767	227.51
158	1.57	3.88861	1132.32	466.456	66.8169	1134.06	506.833	-66.2403	1127.85	503.862	166.977	965.226	583.022	-159.127	971.853	579.551	-0.78049	948.624	544.809	274.252	667.145	604.347	278.892	729.568	376.481	217.686	741.794	388.413	232.233	756.418	302.331	212.857	732.497	216.814	-297.564	704.349	617.579	-271.091	734.329	387.845	-206.667	749.534	396.273	-220.243	759.565	318.649	-199.418	731.777	227.431
159	1.58	3.84412	1132.34	466.435	66.78	1134.08	506.835	-66.2769	1127.87	503.856	166.933	965.255	583.012	-159.149	971.855	579.562	-0.80369	948.653	544.77	274.232	667.167	604.346	278.869	729.565	376.488	217.682	741.813	388.426	232.269	756.461	302.364	212.845	732.496	216.815	-297.585	704.335	617.583	-271.108	734.339	387.863	-206.729	749.578	396.351	-220.17	759.744	318.728	-199.428	731.794	227.475
160	1.59	3.70093	1132.42	466.409	66.6936	1134.08	506.788	-66.3642	1127.9	503.871	166.858	965.299	582.995	-159.223	971.883	579.591	-0.94514	948.758	544.617	274.226	667.18	604.34	278.809	729.592	376.475	217.623	741.84	388.425	232.19	756.542	302.328	212.754	732.507	216.765	-297.627	704.294	617.582	-271.18	734.381	387.913	-206.754	749.527	396.291	-220.32	759.4	318.56	-199.496	731.83	227.494
161	1.6	3.57892	1132.49	466.287	66.6305	1134.09	506.729	-66.4407	1127.91	503.822	166.79	965.33	582.942	-159.275	971.901	579.61	-1.05477	948.842	544.468	274.24	667.188	604.335	278.749	729.622	376.389	217.578	741.865	388.373	232.099	756.61	302.285	212.683	732.529	216.689	-297.614	704.226	617.502	-271.232	734.422	387.9	-206.696	749.473	396.114	-220.495	758.908	318.271	-199.538	731.847	227.478
162	1.61	3.54274	1132.47	466.288	66.6048	1134.08	506.717	-66.479	1127.9	503.834	166.773	965.33	582.932	-159.286	971.864	579.589	-1.07654	948.8	544.485	274.261	667.183	604.315	278.758	729.619	376.394	217.585	741.855	388.4	232.082	756.614	302.299	212.691	732.51	216.697	-297.587	704.133	617.41	-271.24	734.41	387.927	-206.741	749.512	396.21	-220.427	759.153	318.448	-199.534	731.835	227.47
163	1.62	3.53164	1132.41	466.381	66.5924	1134.05	506.764	-66.511	1127.86	503.824	166.783	965.301	582.964	-159.286	971.803	579.585	-1.06357	948.686	544.628	274.267	667.209	604.346	278.775	729.581	376.432	217.62	741.811	388.457	232.137	756.583	302.328	212.747	732.474	216.813	-297.578	704.096	617.439	-271.221	734.361	387.936	-206.692	749.426	396.141	-220.548	758.81	318.244	-199.526	731.813	227.478
164	1.63	3.56939	1132.36	466.455	66.6007	1134.05	506.789	-66.4928	1127.84	503.791	166.793	965.291	582.948	-159.263	971.757	579.581	-1.01485	948.582	544.719	274.262	667.201	604.349	278.823	729.56	376.478	217.648	741.783	388.458	232.198	756.528	302.352	212.798	732.45	216.846	-297.549	704.092	617.488	-271.172	734.319	387.916	-206.725	749.448	396.235	-220.426	759.146	318.385	-199.5	731.789	227.46
165	1.64	3.61612	1132.36	466.433	66.6195	1134.07	506.784	-66.4676	1127.84	503.769	166.799	965.293	582.877	-159.224	971.721	579.57	-0.95706	948.563	544.67	274.273	667.197	604.341	278.869	729.569	376.496	217.69	741.785	388.452	232.264	756.48	302.373	212.855	732.459	216.848	-297.512	704.078	617.482	-271.12	734.322	387.888	-206.576	749.407	396.052	-220.446	758.894	318.13	-199.441	731.78	227.458
166	1.65	3.63242	1132.38	466.43	66.6143	1134.09	506.771	-66.4773	1127.83	503.719	166.779	965.3	582.823	-159.219	971.696	579.571	-0.95074	948.536	544.692	274.264	667.233	604.347	278.877	729.596	376.478	217.705	741.811	388.442	232.277	756.45	302.357	212.87	732.49	216.859	-297.52	704.071	617.515	-271.12	734.322	387.889	-206.616	749.471	396.149	-220.338	759.235	318.375	-199.43	731.785	227.494
167	1.66	3.57259	1132.34	466.464	66.5738	1134.1	506.755	-66.5319	1127.83	503.703	166.741	965.291	582.812	-159.246	971.659	579.577	-0.9744	948.492	544.722	274.251	667.263	604.365	278.858	729.596	376.485	217.676	741.817	388.437	232.245	756.452	302.322	212.845	732.501	216.861	-297.553	704.045	617.545	-271.144	734.31	387.906	-206.567	749.393	396.101	-220.459	758.904	318.206	-199.456	731.79	227.524
168	1.67	3.50843	1132.36	466.339	66.5223	1134.1	506.733	-66.5883	1127.81	503.709	166.704	965.285	582.804	-159.28	971.633	579.565	-1.02943	948.456	544.656	274.241	667.264	604.398	278.837	729.6	376.463	217.633	741.826	388.419	232.184	756.483	302.313	212.807	732.499	216.844	-297.572	703.993	617.531	-271.147	734.316	387.921	-206.733	749.501	396.298	-220.24	759.578	318.653	-199.474	731.804	227.497
169	1.68	3.43131	1132.41	466.238	66.4653	1134.1	506.666	-66.6547	1127.81	503.7	166.659	965.295	582.809	-159.321	971.629	579.568	-1.10202	948.478	544.542	274.225	667.248	604.366	278.8	729.615	376.409	217.585	741.839	388.371	232.153	756.556	302.319	212.755	732.497	216.802	-297.587	703.926	617.498	-271.178	734.339	387.97	-206.809	749.556	396.374	-220.199	759.727	318.769	-199.494	731.817	227.492
170	1.69	3.33342	1132.41	466.241	66.4072	1134.1	506.617	-66.7309	1127.79	503.689	166.609	965.294	582.829	-159.352	971.61	579.578	-1.18521	948.473	544.539	274.226	667.241	604.357	278.759	729.62	376.414	217.561	741.841	388.42	232.114	756.629	302.255	212.711	732.497	216.797	-297.628	703.886	617.504	-271.23	734.349	387.961	-206.882	749.554	396.428	-220.237	759.743	318.862	-199.523	731.828	227.519
171	1.7	3.28327	1132.39	466.166	66.3664	1134.09	506.58	-66.7645	1127.77	503.615	166.595	965.263	582.801	-159.351	971.578	579.557	-1.21658	948.414	544.57	274.233	667.231	604.34	278.749	729.613	376.41	217.578	741.829	388.426	232.09	756.607	302.256	212.719	732.487	216.785	-297.626	703.86	617.472	-271.224	734.342	387.921	-206.813	749.488	396.331	-220.362	759.372	318.61	-199.532	731.831	227.481
172	1.71	3.2996	1132.4	466.056	66.3746	1134.1	506.587	-66.7549	1127.77	503.543	166.598	965.244	582.759	-159.332	971.552	579.535	-1.1734	948.367	544.542	274.24	667.236	604.349	278.783	729.608	376.43	217.608	741.819	388.412	232.094	756.571	302.279	212.758	732.489	216.791	-297.609	703.862	617.429	-271.187	734.346	387.888	-206.654	749.413	396.158	-220.491	758.91	318.222	-199.513	731.84	227.459
173	1.72	3.28459	1132.39	466.03	66.3705	1134.1	506.601	-66.7738	1127.78	503.525	166.592	965.242	582.765	-159.334	971.538	579.56	-1.15421	948.338	544.57	274.243	667.213	604.348	278.827	729.609	376.468	217.632	741.805	388.446	232.113	756.552	302.296	212.786	732.494	216.812	-297.612	703.875	617.454	-271.195	734.345	387.886	-206.696	749.459	396.235	-220.415	759.199	318.395	-199.512	731.837	227.492
174	1.73	3.26745	1132.33	466.053	66.349	1134.07	506.57	-66.7986	1127.76	503.539	166.574	965.223	582.752	-159.325	971.483	579.527	-1.13298	948.247	544.664	274.228	667.187	604.33	278.854	729.588	376.484	217.648	741.79	388.451	232.159	756.518	302.274	212.811	732.476	216.834	-297.65	703.877	617.507	-271.205	734.313	387.907	-206.666	749.388	396.163	-220.503	758.882	318.205	-199.509	731.827	227.482
175	1.74	3.28529	1132.28	466.012	66.3506	1134.04	506.518	-66.8048	1127.7	503.44	166.582	965.193	582.724	-159.3	971.413	579.486	-1.08214	948.149	544.686	274.22	667.183	604.336	278.864	729.56	376.491	217.658	741.77	388.431	232.204	756.442	302.255	212.848	732.454	216.853	-297.676	703.84	617.471	-271.182	734.279	387.887	-206.789	749.459	396.358	-220.251	759.55	318.596	-199.486	731.79	227.454
176	1.75	3.24655	1132.21	466.026	66.3185	1134.04	506.494	-66.8447	1127.67	503.38	166.573	965.17	582.723	-159.313	971.377	579.493	-1.09953	948.061	544.768	274.208	667.192	604.36	278.841	729.538	376.514	217.649	741.77	388.441	232.22	756.418	302.298	212.836	732.448	216.883	-297.712	703.807	617.451	-271.184	734.254	387.903	-206.761	749.401	396.291	-220.345	759.33	318.452	-199.482	731.759	227.472
177	1.76	3.13214	1132.18	466.156	66.2305	1134.05	506.454	-66.9287	1127.66	503.43	166.533	965.177	582.788	-159.363	971.361	579.542	-1.17832	947.999	544.888	274.21	667.206	604.352	278.794	729.542	376.51	217.595	741.79	388.465	232.16	756.479	302.31	212.762	732.466	216.87	-297.771	703.803	617.525	-271.233	734.262	387.953	-206.652	749.267	396.134	-220.675	758.494	318.017	-199.526	731.774	227.541
178	1.77	3.06051	1132.22	466.102	66.1739	1134.07	506.409	-66.9772	1127.66	503.463	166.516	965.195	582.817	-159.382	971.367	579.576	-1.21009	948.026	544.814	274.201	667.199	604.33	278.783	729.575	376.478	217.577	741.801	388.467	232.114	756.524	302.297	212.74	732.49	216.82	-297.774	703.753	617.468	-271.255	734.288	387.965	-206.643	749.26	396.096	-220.751	758.288	317.917	-199.543	731.811	227.545
179	1.78	3.06652	1132.28	465.901	66.1554	1134.07	506.348	-66.9551	1127.66	503.39	166.518	965.203	582.767	-159.353	971.356	579.551	-1.17774	948.09	544.642	274.199	667.182	604.345	278.811	729.595	376.455	217.6	741.825	388.455	232.142	756.544	302.302	212.768	732.503	216.767	-297.743	703.72	617.423	-271.227	734.311	387.905	-206.581	749.302	396.011	-220.708	758.26	317.792	-199.516	731.837	227.491
180	1.79	3.07724	1132.33	465.843	66.1549	1134.08	506.38	-66.9519	1127.67	503.407	166.52	965.206	582.795	-159.309	971.34	579.56	-1.14515	948.11	544.615	274.193	667.179	604.355	278.837	729.605	376.481	217.636	741.852	388.478	232.181	756.578	302.323	212.801	732.5	216.788	-297.737	703.728	617.514	-271.196	734.329	387.9	-206.627	749.39	396.103	-220.541	758.668	318.056	-199.501	731.861	227.49
181	1.8	3.04818	1132.36	465.803	66.1371	1134.1	506.425	-66.9766	1127.7	503.412	166.53	965.215	582.836	-159.301	971.328	579.588	-1.14224	948.148	544.558	274.2	667.167	604.381	278.843	729.627	376.518	217.652	741.859	388.496	232.214	756.611	302.326	212.819	732.507	216.825	-297.73	703.723	617.56	-271.193	734.361	387.91	-206.797	749.532	396.354	-220.25	759.565	318.674	-199.491	731.877	227.495
182	1.81	3.03078	1132.4	465.723	66.1087	1134.12	506.369	-66.9883	1127.71	503.364	166.528	965.193	582.798	-159.283	971.301	579.544	-1.14372	948.128	544.495	274.198	667.146	604.362	278.845	729.633	376.468	217.65	741.852	388.454	232.197	756.606	302.259	212.829	732.514	216.788	-297.692	703.653	617.446	-271.174	734.355	387.883	-206.804	749.577	396.331	-220.167	759.788	318.745	-199.483	731.875	227.445
183	1.82	2.9936	1132.33	465.825	66.0961	1134.11	506.367	-67.0362	1127.66	503.389	166.505	965.14	582.801	-159.283	971.237	579.543	-1.13707	947.996	544.631	274.194	667.126	604.343	278.866	729.595	376.477	217.647	741.832	388.457	232.181	756.553	302.28	212.84	732.491	216.796	-297.669	703.58	617.375	-271.165	734.312	387.899	-206.811	749.546	396.371	-220.185	759.811	318.765	-199.478	731.848	227.461
184	1.83	2.92353	1132.22	466.156	66.0492	1134.1	506.487	-67.1144	1127.62	503.494	166.471	965.107	582.862	-159.31	971.162	579.603	-1.17112	947.831	544.927	274.174	667.117	604.342	278.837	729.567	376.546	217.618	741.784	388.505	232.171	756.514	302.365	212.821	732.472	216.869	-297.683	703.529	617.403	-271.206	734.257	387.973	-206.864	749.495	396.479	-220.259	759.774	318.876	-199.506	731.799	227.544
185	1.84	2.86564	1132.18	466.286	65.9989	1134.09	506.543	-67.1553	1127.61	503.497	166.439	965.071	582.884	-159.337	971.109	579.616	-1.19592	947.755	545.002	274.152	667.12	604.346	278.811	729.548	376.543	217.57	741.749	388.489	232.154	756.497	302.363	212.796	732.448	216.901	-297.695	703.476	617.387	-271.225	734.225	387.997	-206.888	749.447	396.521	-220.299	759.745	318.927	-199.526	731.782	227.552
186	1.85	2.83717	1132.22	466.161	65.9681	1134.12	506.46	-67.1616	1127.62	503.477	166.428	965.054	582.831	-159.326	971.08	579.586	-1.18204	947.752	544.912	274.133	667.105	604.306	278.802	729.542	376.485	217.56	741.745	388.417	232.169	756.477	302.334	212.786	732.432	216.863	-297.687	703.441	617.357	-271.213	734.228	387.948	-206.868	749.429	396.474	-220.27	759.737	318.862	-199.507	731.774	227.48
187	1.86	2.83812	1132.27	466.178	65.9577	1134.15	506.488	-67.1579	1127.65	503.51	166.436	965.058	582.855	-159.302	971.074	579.578	-1.16061	947.754	544.898	274.108	667.098	604.289	278.807	729.557	376.487	217.573	741.765	388.427	232.197	756.492	302.335	212.792	732.467	216.85	-297.703	703.452	617.419	-271.198	734.23	387.929	-206.871	749.471	396.469	-220.24	759.752	318.827	-199.5	731.79	227.477
188	1.87	2.81987	1132.38	466.203	65.9399	1134.22	506.556	-67.174	1127.72	503.582	166.436	965.099	582.916	-159.301	971.1	579.599	-1.16274	947.827	544.834	274.084	667.121	604.3	278.802	729.601	376.489	217.574	741.81	388.459	232.192	756.548	302.376	212.792	732.516	216.843	-297.701	703.482	617.489	-271.196	734.28	387.935	-206.855	749.517	396.503	-220.222	759.796	318.85	-199.511	731.848	227.515
189	1.88	2.79432	1132.56	466.035	65.8889	1134.3	506.506	-67.192	1127.79	503.587	166.424	965.125	582.912	-159.294	971.125	579.605	-1.18286	947.939	544.676	274.065	667.104	604.291	278.804	729.65	376.439	217.551	741.864	388.426	232.134	756.594	302.339	212.785	732.566	216.794	-297.665	703.506	617.524	-271.189	734.34	387.905	-206.758	749.526	396.311	-220.315	759.472	318.569	-199.508	731.9	227.489
190	1.89	2.78566	1132.63	465.937	65.8801	1134.34	506.482	-67.0342	1127.79	503.658	166.439	965.119	582.918	-159.271	971.123	579.609	-1.17718	947.954	544.592	274.055	667.044	604.265	278.808	729.667	376.42	217.563	741.863	388.42	232.133	756.613	302.302	212.805	732.562	216.782	-297.639	703.476	617.485	-271.171	734.348	387.925	-206.643	749.476	396.09	-220.439	759.005	318.23	-199.492	731.899	227.459
191	1.9	2.77594	1132.6	466.114	65.8932	1134.33	506.535	-66.8559	1127.78	503.827	166.454	965.092	582.954	-159.239	971.071	579.634	-1.17456	947.874	544.693	274.075	667.005	604.26	278.822	729.63	376.48	217.605	741.833	388.49	232.186	756.592	302.356	212.834	732.518	216.844	-297.622	703.417	617.472	-271.172	734.321	387.97	-206.787	749.547	396.39	-220.245	759.627	318.695	-199.492	731.873	227.493
192	1.91	2.75979	1132.55	466.255	65.8995	1134.3	506.605	-67.1403	1127.76	503.78	166.474	965.051	583.005	-159.23	971.009	579.669	-1.17651	947.769	544.84	274.124	667.002	604.295	278.841	729.579	376.529	217.632	741.8	388.529	232.204	756.564	302.353	212.859	732.477	216.891	-297.602	703.348	617.426	-271.172	734.283	387.964	-206.862	749.509	396.5	-220.214	759.751	318.807	-199.49	731.842	227.507
193	1.92	2.742	1132.53	466.302	65.8786	1134.3	506.617	-67.2381	1127.74	503.753	166.476	965.007	583.026	-159.235	970.966	579.664	-1.1662	947.69	544.891	274.156	666.996	604.339	278.841	729.544	376.498	217.624	741.769	388.52	232.218	756.552	302.369	212.852	732.446	216.881	-297.59	703.259	617.354	-271.187	734.251	387.959	-206.809	749.396	396.359	-220.351	759.372	318.558	-199.505	731.822	227.513
194	1.93	2.709	1132.5	466.433	65.847	1134.31	506.671	-67.2824	1127.73	503.807	166.454	964.969	583.055	-159.254	970.938	579.699	-1.17707	947.637	544.953	274.15	666.974	604.332	278.838	729.52	376.518	217.605	741.748	388.544	232.229	756.509	302.413	212.842	732.428	216.914	-297.615	703.221	617.343	-271.207	734.216	388.003	-206.654	749.228	396.155	-220.676	758.487	318.038	-199.537	731.798	227.558
195	1.94	2.70061	1132.51	466.537	65.8307	1134.34	506.731	-67.293	1127.75	503.855	166.454	964.955	583.09	-159.245	970.926	579.729	-1.17437	947.573	545.088	274.114	666.968	604.333	278.823	729.518	376.549	217.596	741.744	388.552	232.211	756.486	302.397	212.84	732.433	216.942	-297.641	703.237	617.356	-271.203	734.211	388.023	-206.698	749.243	396.253	-220.639	758.65	318.188	-199.54	731.78	227.599
196	1.95	2.76085	1132.59	466.445	65.8326	1134.38	506.694	-67.2619	1127.81	503.839	166.468	964.95	583.075	-159.21	970.935	579.7	-1.12304	947.596	545	274.082	666.97	604.343	278.82	729.545	376.531	217.592	741.76	388.508	232.203	756.491	302.373	212.837	732.476	216.918	-297.649	703.283	617.36	-271.182	734.239	387.978	-206.824	749.392	396.436	-220.341	759.5	318.662	-199.505	731.784	227.559
197	1.96	2.81284	1132.7	466.367	65.8387	1134.44	506.682	-67.2435	1127.86	503.822	166.485	964.98	583.083	-159.203	970.964	579.682	-1.08517	947.677	544.879	274.049	666.957	604.3	278.82	729.593	376.507	217.595	741.792	388.489	232.208	756.505	302.379	212.838	732.528	216.883	-297.673	703.339	617.402	-271.163	734.274	387.899	-206.727	749.444	396.279	-220.356	759.379	318.515	-199.499	731.826	227.516
198	1.97	2.82073	1132.77	466.336	65.8266	1134.49	506.684	-67.2465	1127.92	503.836	166.488	964.992	583.087	-159.215	970.981	579.688	-1.08701	947.718	544.851	274.019	666.929	604.239	278.814	729.617	376.508	217.598	741.818	388.497	232.232	756.528	302.399	212.838	732.562	216.876	-297.695	703.406	617.502	-271.172	734.308	387.903	-206.631	749.425	396.138	-220.478	758.988	318.269	-199.516	731.869	227.517
199	1.98	2.81109	1132.81	466.268	65.8256	1134.49	506.647	-67.2489	1127.95	503.828	166.483	964.987	583.054	-159.206	970.968	579.671	-1.10274	947.713	544.781	274.013	666.91	604.233	278.812	729.613	376.475	217.585	741.824	388.451	232.21	756.566	302.372	212.838	732.547	216.844	-297.691	703.429	617.532	-271.183	734.328	387.883	-206.761	749.54	396.347	-220.251	759.621	318.689	-199.506	731.875	227.479
200	1.99	2.79016	1132.81	466.272	65.843	1134.48	506.669	-67.2429	1127.95	503.835	166.459	964.948	583.037	-159.194	970.929	579.648	-1.12376	947.667	544.791	274.032	666.876	604.237	278.807	729.594	376.472	217.588	741.806	388.469	232.148	756.567	302.337	212.844	732.507	216.828	-297.67	703.357	617.448	-271.188	734.313	387.872	-206.792	749.573	396.341	-220.21	759.75	318.774	-199.512	731.859	227.462
201	2	2.73001	1132.79	466.377	65.8372	1134.47	506.708	-67.2934	1127.93	503.92	166.432	964.909	583.052	-159.224	970.882	579.704	-1.19555	947.61	544.911	274.047	666.825	604.247	278.793	729.57	376.539	217.573	741.795	388.525	232.11	756.577	302.372	212.827	732.487	216.88	-297.677	703.274	617.383	-271.237	734.286	387.924	-206.871	749.543	396.41	-220.271	759.756	318.836	-199.564	731.842	227.497
202	2.01	2.68162	1132.73	466.498	65.8201	1134.47	506.679	-67.3431	1127.91	503.98	166.413	964.865	583.042	-159.239	970.842	579.751	-1.24552	947.537	545.007	274.046	666.778	604.227	278.77	729.549	376.564	217.538	741.773	388.501	232.114	756.585	302.398	212.8	732.471	216.89	-297.69	703.221	617.362	-271.272	734.256	387.962	-206.862	749.42	396.357	-220.44	759.353	318.65	-199.593	731.816	227.536
203	2.02	2.72703	1132.71	466.439	65.8443	1134.43	506.648	-67.2961	1127.87	503.908	166.436	964.829	583.03	-159.189	970.808	579.716	-1.1967	947.451	544.997	274.058	666.798	604.27	278.793	729.53	376.548	217.548	741.73	388.466	232.121	756.547	302.367	212.825	732.459	216.882	-297.667	703.205	617.356	-271.237	734.244	387.924	-206.743	749.316	396.204	-220.565	758.884	318.313	-199.554	731.798	227.51
204	2.03	2.8133	1132.7	466.421	65.9087	1134.41	506.674	-67.2079	1127.86	503.834	166.463	964.805	583.02	-159.139	970.783	579.656	-1.08573	947.386	545.041	274.049	666.831	604.315	278.837	729.538	376.574	217.58	741.731	388.481	232.214	756.494	302.409	212.865	732.476	216.898	-297.648	703.217	617.362	-271.181	734.233	387.918	-206.816	749.415	396.383	-220.31	759.549	318.697	-199.511	731.785	227.529
205	2.04	2.85829	1132.71	466.454	65.9277	1134.43	506.692	-67.1881	1127.87	503.868	166.446	964.819	583.013	-159.118	970.811	579.673	-1.06074	947.386	545.08	274.011	666.815	604.3	278.841	729.569	376.595	217.587	741.762	388.504	232.258	756.508	302.455	212.862	732.524	216.901	-297.672	703.261	617.424	-271.171	734.259	387.974	-206.759	749.419	396.372	-220.368	759.375	318.574	-199.506	731.804	227.562
206	2.05	2.8667	1132.76	466.324	65.9141	1134.48	506.629	-67.1837	1127.88	503.831	166.442	964.833	583.016	-159.109	970.839	579.684	-1.07199	947.444	544.99	273.977	666.78	604.255	278.822	729.603	376.538	217.568	741.781	388.472	232.23	756.551	302.399	212.843	732.571	216.858	-297.699	703.301	617.476	-271.176	734.269	387.992	-206.576	749.329	396.069	-220.615	758.569	318.054	-199.501	731.833	227.542
207	2.06	2.88472	1132.81	466.165	65.9176	1134.49	506.547	-67.1517	1127.89	503.736	166.471	964.828	582.987	-159.1	970.839	579.641	-1.03263	947.472	544.886	273.968	666.752	604.239	278.824	729.613	376.488	217.573	741.786	388.447	232.212	756.551	302.344	212.855	732.568	216.837	-297.665	703.323	617.462	-271.152	734.282	387.944	-206.579	749.371	396.036	-220.531	758.747	318.098	-199.483	731.846	227.497
208	2.07	2.86565	1132.79	466.159	65.9271	1134.46	506.526	-67.1593	1127.89	503.73	166.471	964.809	582.998	-159.114	970.831	579.638	-1.04445	947.439	544.938	273.975	666.724	604.228	278.819	729.584	376.507	217.58	741.779	388.496	232.213	756.576	302.371	212.853	732.522	216.899	-297.652	703.305	617.469	-271.151	734.284	387.937	-206.777	749.501	396.34	-220.287	759.537	318.623	-199.498	731.844	227.502
209	2.08	2.80179	1132.78	466.171	65.8928	1134.45	506.504	-67.2189	1127.9	503.762	166.453	964.78	583.007	-159.135	970.822	579.652	-1.1121	947.43	544.942	273.979	666.668	604.185	278.799	729.549	376.541	217.555	741.77	388.51	232.169	756.627	302.334	212.821	732.5	216.92	-297.643	703.262	617.464	-271.204	734.288	387.982	-206.804	749.46	396.354	-220.394	759.339	318.6	-199.549	731.857	227.539
210	2.09	2.78034	1132.78	466.074	65.906	1134.43	506.448	-67.2128	1127.88	503.699	166.457	964.742	582.965	-159.123	970.798	579.631	-1.13085	947.452	544.865	274.002	666.623	604.172	278.795	729.542	376.513	217.557	741.75	388.485	232.148	756.617	302.322	212.817	732.493	216.882	-297.586	703.198	617.361	-271.226	734.28	387.968	-206.716	749.383	396.239	-220.536	758.899	318.31	-199.558	731.849	227.515
211	2.1	2.81682	1132.73	466.044	65.9744	1134.39	506.443	-67.1679	1127.85	503.642	166.505	964.717	582.972	-159.084	970.767	579.621	-1.0875	947.409	544.846	274.022	666.592	604.17	278.833	729.516	376.527	217.617	741.724	388.501	232.189	756.556	302.372	212.86	732.474	216.888	-297.538	703.177	617.321	-271.186	734.258	387.931	-206.796	749.471	396.397	-220.308	759.541	318.697	-199.532	731.832	227.487
212	2.11	2.86304	1132.67	466.188	66.0082	1134.37	506.471	-67.1479	1127.83	503.668	166.54	964.703	583.026	-159.059	970.75	579.629	-1.03751	947.325	544.983	274.018	666.592	604.169	278.875	729.501	376.622	217.65	741.705	388.581	232.239	756.505	302.436	212.896	732.46	216.971	-297.533	703.196	617.362	-271.163	734.241	387.964	-206.816	749.476	396.477	-220.262	759.716	318.814	-199.52	731.829	227.54
213	2.12	2.87234	1132.67	466.209	66.0041	1134.39	506.458	-67.1406	1127.83	503.659	166.542	964.692	583.014	-159.054	970.765	579.63	-1.02212	947.315	545.003	273.978	666.577	604.159	278.863	729.519	376.632	217.609	741.72	388.559	232.224	756.478	302.442	212.881	732.479	216.983	-297.555	703.221	617.43	-271.153	734.238	387.989	-206.83	749.465	396.53	-220.242	759.805	318.842	-199.514	731.83	227.562
214	2.13	2.899	1132.7	466.063	65.9856	1134.41	506.369	-67.1139	1127.83	503.562	166.533	964.695	582.947	-159.051	970.788	579.579	-0.99219	947.351	544.88	273.931	666.574	604.134	278.838	729.547	376.55	217.575	741.74	388.5	232.201	756.479	302.374	212.87	732.515	216.931	-297.566	703.234	617.448	-271.142	734.254	387.942	-206.811	749.492	396.468	-220.215	759.833	318.811	-199.503	731.841	227.511
215	2.14	2.89001	1132.69	466.047	65.9852	1134.41	506.324	-67.102	1127.82	503.544	166.522	964.703	582.954	-159.046	970.793	579.561	-0.99528	947.329	544.874	273.92	666.587	604.137	278.818	729.561	376.525	217.564	741.746	388.487	232.21	756.494	302.348	212.838	732.525	216.872	-297.577	703.268	617.452	-271.143	734.264	387.921	-206.811	749.505	396.423	-220.231	759.81	318.817	-199.515	731.839	227.496
216	2.15	2.85937	1132.64	466.124	65.974	1134.4	506.306	-67.1222	1127.8	503.588	166.496	964.682	582.962	-159.076	970.779	579.559	-1.02075	947.256	544.981	273.92	666.581	604.156	278.781	729.534	376.534	217.525	741.74	388.484	232.199	756.512	302.384	212.791	732.528	216.855	-297.613	703.245	617.419	-271.175	734.237	387.956	-206.854	749.479	396.496	-220.275	759.767	318.836	-199.546	731.823	227.538
217	2.16	2.84047	1132.62	466.108	65.959	1134.4	506.271	-67.1456	1127.79	503.575	166.494	964.653	582.933	-159.094	970.76	579.541	-1.03521	947.233	544.956	273.931	666.555	604.148	278.761	729.517	376.526	217.512	741.735	388.493	232.165	756.534	302.424	212.775	732.508	216.872	-297.603	703.202	617.393	-271.204	734.22	388.001	-206.882	749.468	396.493	-220.292	759.754	318.831	-199.559	731.825	227.552
218	2.17	2.85984	1132.65	465.957	65.9984	1134.39	506.249	-67.1137	1127.8	503.508	166.521	964.641	582.914	-159.085	970.739	579.533	-1.028	947.26	544.888	273.962	666.52	604.17	278.793	729.508	376.531	217.532	741.74	388.511	232.11	756.57	302.36	212.786	732.491	216.874	-297.538	703.17	617.371	-271.205	734.236	387.999	-206.852	749.476	396.442	-220.279	759.765	318.845	-199.555	731.848	227.528
219	2.18	2.90378	1132.67	465.89	66.0725	1134.36	506.25	-67.0647	1127.8	503.49	166.558	964.631	582.943	-159.039	970.725	579.545	-1.00145	947.243	544.916	274.015	666.477	604.185	278.836	729.501	376.574	217.579	741.727	388.536	232.143	756.577	302.392	212.838	732.478	216.913	-297.509	703.16	617.368	-271.181	734.239	387.979	-206.857	749.485	396.48	-220.259	759.776	318.879	-199.546	731.86	227.519
220	2.19	3.0062	1132.68	465.893	66.1561	1134.34	506.243	-66.9922	1127.82	503.387	166.583	964.616	582.898	-158.976	970.724	579.527	-0.95061	947.252	544.858	274.048	666.439	604.176	278.878	729.518	376.59	217.64	741.725	388.538	232.212	756.567	302.426	212.9	732.484	216.94	-297.474	703.172	617.393	-271.147	734.248	387.975	-206.844	749.509	396.485	-220.206	759.809	318.854	-199.519	731.86	227.504
221	2.2	3.11525	1132.72	465.77	66.2284	1134.33	506.244	-66.9039	1127.83	503.317	166.633	964.629	582.884	-158.919	970.735	579.495	-0.89816	947.313	544.708	274.041	666.401	604.144	278.907	729.539	376.57	217.685	741.748	388.539	232.229	756.552	302.416	212.939	732.512	216.93	-297.44	703.203	617.433	-271.109	734.28	387.961	-206.789	749.546	396.426	-220.147	759.848	318.807	-199.477	731.876	227.481
222	2.21	3.15214	1132.74	465.732	66.2651	1134.32	506.252	-66.8817	1127.83	503.285	166.625	964.62	582.863	-158.923	970.74	579.479	-0.88789	947.295	544.737	274.022	666.397	604.119	278.892	729.543	376.566	217.67	741.761	388.535	232.237	756.523	302.382	212.919	732.531	216.907	-297.47	703.21	617.45	-271.103	734.282	387.963	-206.688	749.502	396.27	-220.262	759.48	318.546	-199.477	731.882	227.483
223	2.22	3.16407	1132.68	465.844	66.259	1134.31	506.199	-66.8731	1127.8	503.251	166.585	964.611	582.846	-158.96	970.729	579.483	-0.91505	947.21	544.869	273.992	666.397	604.087	278.864	729.541	376.58	217.633	741.754	388.553	232.223	756.532	302.365	212.871	732.518	216.913	-297.533	703.201	617.431	-271.14	734.251	387.983	-206.645	749.395	396.176	-220.468	758.973	318.259	-199.515	731.864	227.519
224	2.23	3.19196	1132.58	465.921	66.2455	1134.28	506.171	-66.8481	1127.75	503.203	166.554	964.593	582.851	-158.972	970.687	579.483	-0.90847	947.11	544.948	273.961	666.384	604.034	278.853	729.519	376.558	217.601	741.73	388.57	232.23	756.492	302.407	212.84	732.504	216.911	-297.57	703.178	617.379	-271.151	734.226	388.004	-206.791	749.44	396.392	-220.302	759.58	318.71	-199.538	731.841	227.528
225	2.24	3.21089	1132.53	465.944	66.2474	1134.26	506.163	-66.8368	1127.74	503.226	166.545	964.572	582.861	-158.989	970.665	579.457	-0.91514	947.064	544.95	273.941	666.396	604.018	278.833	729.501	376.549	217.569	741.716	388.547	232.237	756.488	302.44	212.809	732.492	216.901	-297.568	703.137	617.33	-271.16	734.214	388.002	-206.832	749.429	396.456	-220.271	759.721	318.836	-199.542	731.825	227.534
226	2.25	3.19174	1132.52	465.916	66.2583	1134.24	506.169	-66.8398	1127.75	503.243	166.528	964.552	582.864	-159.009	970.656	579.451	-0.96273	947.034	544.979	273.946	666.383	604.005	278.802	729.496	376.56	217.539	741.705	388.547	232.199	756.54	302.411	212.782	732.495	216.887	-297.579	703.132	617.365	-271.193	734.211	387.994	-206.899	749.422	396.507	-220.3	759.748	318.88	-199.564	731.814	227.538
227	2.26	3.21301	1132.53	465.876	66.2776	1134.23	506.164	-66.8238	1127.75	503.183	166.535	964.546	582.84	-158.993	970.641	579.442	-0.96362	947.056	544.908	273.99	666.346	604.036	278.793	729.501	376.542	217.542	741.702	388.546	232.185	756.523	302.405	212.797	732.488	216.879	-297.565	703.131	617.385	-271.199	734.215	387.979	-206.905	749.445	396.508	-220.298	759.739	318.868	-199.57	731.821	227.519
228	2.27	3.27795	1132.55	465.791	66.3493	1134.24	506.159	-66.7752	1127.76	503.096	166.584	964.538	582.83	-158.946	970.63	579.437	-0.90841	947.094	544.83	274.019	666.311	604.08	278.841	729.509	376.56	217.584	741.709	388.525	232.189	756.52	302.402	212.832	732.478	216.887	-297.509	703.129	617.365	-271.154	734.233	387.956	-206.836	749.488	396.471	-220.246	759.767	318.812	-199.541	731.847	227.482
229	2.28	3.32357	1132.61	465.703	66.3932	1134.23	506.198	-66.7316	1127.78	503.082	166.625	964.534	582.861	-158.909	970.626	579.442	-0.87431	947.149	544.8	274.029	666.278	604.104	278.864	729.517	376.601	217.628	741.724	388.591	232.2	756.527	302.423	212.859	732.489	216.958	-297.451	703.141	617.405	-271.144	734.253	387.954	-206.796	749.523	396.439	-220.221	759.816	318.84	-199.524	731.865	227.502
230	2.29	3.33174	1132.64	465.679	66.4113	1134.24	506.215	-66.717	1127.79	503.094	166.639	964.523	582.858	-158.894	970.634	579.437	-0.86208	947.142	544.85	274.044	666.258	604.116	278.864	729.508	376.626	217.621	741.723	388.597	232.208	756.547	302.437	212.865	732.505	216.984	-297.442	703.143	617.44	-271.159	734.246	388.012	-206.827	749.526	396.474	-220.231	759.824	318.868	-199.535	731.862	227.53
231	2.3	3.37117	1132.58	465.671	66.4247	1134.23	506.148	-66.6965	1127.77	503.058	166.668	964.508	582.835	-158.882	970.625	579.41	-0.83653	947.102	544.828	274.058	666.251	604.114	278.871	729.497	376.591	217.63	741.709	388.544	232.211	756.539	302.415	212.887	732.502	216.956	-297.44	703.151	617.425	-271.145	734.229	387.986	-206.814	749.51	396.443	-220.22	759.808	318.797	-199.519	731.845	227.505
232	2.31	3.38252	1132.55	465.654	66.4336	1134.23	506.096	-66.6809	1127.75	503.05	166.682	964.499	582.848	-158.875	970.632	579.387	-0.82171	947.089	544.757	274.037	666.235	604.063	278.863	729.499	376.559	217.624	741.71	388.528	232.209	756.524	302.406	212.879	732.508	216.93	-297.442	703.157	617.419	-271.128	734.231	387.964	-206.783	749.488	396.42	-220.212	759.803	318.807	-199.518	731.831	227.499
233	2.32	3.35591	1132.53	465.726	66.4099	1134.24	506.088	-66.7065	1127.75	503.098	166.648	964.502	582.869	-158.902	970.641	579.413	-0.86669	947.033	544.865	274.005	666.232	604.038	278.81	729.514	376.552	217.582	741.727	388.559	232.199	756.545	302.413	212.817	732.519	216.929	-297.494	703.162	617.444	-271.157	734.224	388.026	-206.76	749.417	396.387	-220.371	759.41	318.644	-199.563	731.832	227.529
234	2.33	3.32391	1132.54	465.731	66.3875	1134.24	506.072	-66.7307	1127.74	503.087	166.628	964.494	582.854	-158.931	970.653	579.4	-0.89919	947.022	544.909	273.973	666.231	604.041	278.785	729.523	376.548	217.553	741.735	388.564	232.185	756.565	302.402	212.764	732.534	216.909	-297.538	703.173	617.433	-271.195	734.218	388.03	-206.713	749.337	396.264	-220.566	758.931	318.336	-199.589	731.839	227.538
235	2.34	3.36145	1132.55	465.657	66.4311	1134.24	506.069	-66.7079	1127.75	503.016	166.66	964.482	582.813	-158.891	970.666	579.381	-0.85638	947.038	544.827	273.959	666.209	604.029	278.807	729.522	376.544	217.576	741.729	388.544	232.22	756.572	302.419	212.801	732.531	216.917	-297.528	703.158	617.367	-271.159	734.231	387.984	-206.824	749.445	396.405	-220.333	759.592	318.714	-199.57	731.846	227.493
236	2.35	3.42668	1132.51	465.72	66.488	1134.23	506.095	-66.6675	1127.75	503.029	166.722	964.453	582.78	-158.826	970.645	579.359	-0.78178	947.024	544.792	273.973	666.16	604.032	278.849	729.506	376.564	217.617	741.697	388.538	232.285	756.543	302.433	212.865	732.51	216.933	-297.505	703.168	617.399	-271.114	734.226	387.983	-206.822	749.48	396.46	-220.229	759.757	318.818	-199.521	731.844	227.467
237	2.36	3.42867	1132.47	465.796	66.4972	1134.22	506.083	-66.6552	1127.75	503.082	166.747	964.435	582.779	-158.781	970.627	579.393	-0.75407	946.974	544.824	273.973	666.102	603.992	278.878	729.483	376.611	217.631	741.675	388.576	232.282	756.518	302.412	212.887	732.492	216.97	-297.468	703.199	617.47	-271.116	734.223	388.02	-206.831	749.471	396.544	-220.206	759.805	318.871	-199.522	731.83	227.503
238	2.37	3.40337	1132.52	465.714	66.4854	1134.23	506.067	-66.6568	1127.76	503.045	166.743	964.431	582.785	-158.755	970.637	579.404	-0.76487	946.972	544.786	273.997	666.044	603.973	278.886	729.488	376.617	217.631	741.696	388.611	232.262	756.533	302.458	212.903	732.486	217.007	-297.418	703.189	617.414	-271.117	734.24	387.983	-206.808	749.489	396.516	-220.222	759.836	318.87	-199.528	731.846	227.501
239	2.38	3.38565	1132.56	465.594	66.4802	1134.24	506.044	-66.6632	1127.78	503.023	166.753	964.406	582.734	-158.739	970.636	579.41	-0.75306	947.012	544.699	274.029	666.01	603.971	278.887	729.48	376.631	217.648	741.691	388.629	232.242	756.543	302.5	212.905	732.488	216.996	-297.393	703.177	617.364	-271.124	734.248	387.975	-206.784	749.508	396.41	-220.219	759.83	318.861	-199.529	731.856	227.512
240	2.39	3.35723	1132.54	465.604	66.4735	1134.24	506.008	-66.6786	1127.77	503.053	166.752	964.376	582.708	-158.752	970.618	579.407	-0.74457	947.002	544.707	274.035	665.952	603.932	278.862	729.461	376.626	217.637	741.675	388.631	232.227	756.535	302.47	212.89	732.473	216.984	-297.411	703.187	617.397	-271.146	734.235	387.996	-206.791	749.503	396.426	-220.229	759.808	318.852	-199.537	731.843	227.543
241	2.4	3.32974	1132.54	465.599	66.4447	1134.24	505.933	-66.6828	1127.76	503.063	166.753	964.361	582.713	-158.762	970.628	579.365	-0.75724	946.976	544.725	274.033	665.94	603.968	278.837	729.458	376.618	217.61	741.679	388.617	232.214	756.555	302.445	212.856	732.482	216.968	-297.436	703.186	617.398	-271.157	734.241	387.983	-206.833	749.488	396.477	-220.247	759.797	318.84	-199.562	731.844	227.535
242	2.41	3.30523	1132.6	465.489	66.4244	1134.26	505.858	-66.6823	1127.76	503.034	166.75	964.352	582.684	-158.781	970.655	579.338	-0.77752	947.004	544.641	274.022	665.948	603.981	278.813	729.479	376.558	217.587	741.685	388.574	232.177	756.578	302.4	212.793	732.517	216.902	-297.453	703.21	617.399	-271.157	734.252	387.977	-206.846	749.508	396.408	-220.27	759.787	318.81	-199.571	731.849	227.486
243	2.42	3.29111	1132.59	465.485	66.3918	1134.27	505.82	-66.6869	1127.75	503.038	166.728	964.336	582.669	-158.797	970.656	579.338	-0.78289	946.987	544.654	274.01	665.942	603.953	278.788	729.491	376.507	217.548	741.681	388.532	232.148	756.573	302.374	212.765	732.526	216.868	-297.474	703.24	617.433	-271.184	734.247	388.007	-206.861	749.502	396.398	-220.287	759.769	318.814	-199.579	731.838	227.502
244	2.43	3.31669	1132.5	465.607	66.4026	1134.25	505.867	-66.6892	1127.74	503.108	166.728	964.319	582.683	-158.789	970.642	579.369	-0.77768	946.913	544.783	274.003	665.943	603.967	278.788	729.49	376.572	217.528	741.666	388.552	232.159	756.542	302.425	212.771	732.509	216.919	-297.498	703.261	617.466	-271.178	734.227	388.036	-206.871	749.465	396.484	-220.307	759.774	318.897	-199.579	731.816	227.577
245	2.44	3.37472	1132.43	465.699	66.454	1134.24	505.922	-66.6599	1127.73	503.084	166.755	964.293	582.686	-158.762	970.628	579.378	-0.74271	946.849	544.843	273.98	665.951	603.961	278.812	729.483	376.61	217.549	741.643	388.572	232.178	756.487	302.468	212.8	732.489	216.984	-297.481	703.271	617.442	-271.147	734.208	388.025	-206.758	749.37	396.406	-220.414	759.395	318.644	-199.55	731.797	227.563
246	2.45	3.43873	1132.42	465.671	66.4976	1134.22	505.914	-66.6161	1127.71	502.991	166.789	964.278	582.671	-158.724	970.617	579.347	-0.68919	946.856	544.782	273.979	665.906	603.944	278.821	729.474	376.59	217.583	741.65	388.567	232.23	756.455	302.514	212.842	732.495	217.009	-297.457	703.248	617.398	-271.13	734.209	387.988	-206.64	749.309	396.218	-220.532	758.945	318.262	-199.543	731.818	227.506
247	2.46	3.46819	1132.43	465.581	66.5368	1134.21	505.892	-66.5846	1127.71	502.952	166.828	964.282	582.646	-158.688	970.589	579.336	-0.67802	946.862	544.777	273.984	665.84	603.917	278.847	729.468	376.617	217.61	741.654	388.59	232.262	756.478	302.468	212.888	732.485	216.99	-297.442	703.214	617.402	-271.133	734.211	387.983	-206.68	749.368	396.27	-220.418	759.221	318.465	-199.548	731.832	227.514
248	2.47	3.49679	1132.4	465.546	66.5643	1134.18	505.871	-66.5636	1127.71	502.955	166.841	964.282	582.644	-158.653	970.569	579.329	-0.68733	946.884	544.752	273.999	665.805	603.886	278.876	729.46	376.649	217.634	741.664	388.602	232.263	756.544	302.429	212.909	732.487	216.981	-297.435	703.2	617.398	-271.14	734.234	388.016	-206.6	749.336	396.174	-220.496	758.875	318.266	-199.549	731.832	227.504
249	2.48	3.48485	1132.43	465.398	66.5634	1134.18	505.844	-66.5484	1127.7	502.911	166.841	964.293	582.658	-158.652	970.569	579.301	-0.70117	946.929	544.661	274.025	665.791	603.882	278.861	729.473	376.595	217.636	741.673	388.606	232.208	756.618	302.393	212.891	732.497	216.952	-297.419	703.184	617.353	-271.156	734.261	387.967	-206.699	749.386	396.291	-220.408	759.175	318.421	-199.566	731.835	227.458
250	2.49	3.45141	1132.46	465.34	66.5549	1134.19	505.828	-66.5576	1127.7	502.899	166.83	964.303	582.663	-158.677	970.587	579.334	-0.74504	946.967	544.623	274.036	665.786	603.905	278.832	729.497	376.571	217.603	741.694	388.611	232.135	756.662	302.348	212.844	732.515	216.935	-297.4	703.184	617.365	-271.189	734.275	387.987	-206.586	749.294	396.074	-220.673	758.479	318.001	-199.588	731.854	227.479
251	2.5	3.44944	1132.42	465.389	66.5684	1134.18	505.848	-66.5643	1127.67	502.928	166.82	964.298	582.68	-158.692	970.596	579.386	-0.74979	946.934	544.711	274.029	665.788	603.921	278.817	729.504	376.613	217.579	741.699	388.645	232.134	756.662	302.384	212.816	732.52	216.959	-297.42	703.166	617.383	-271.207	734.272	388.091	-206.662	749.33	396.189	-220.638	758.691	318.228	-199.607	731.853	227.55
252	2.51	3.51808	1132.35	465.385	66.589	1134.16	505.828	-66.5234	1127.65	502.919	166.856	964.275	582.676	-158.667	970.592	579.385	-0.68642	946.905	544.735	274.013	665.773	603.898	278.831	729.498	376.623	217.584	741.693	388.641	232.183	756.603	302.444	212.832	732.517	216.945	-297.434	703.207	617.432	-271.157	734.262	388.079	-206.783	749.454	396.421	-220.344	759.532	318.736	-199.576	731.859	227.543
253	2.52	3.62596	1132.26	465.428	66.6395	1134.14	505.87	-66.4636	1127.61	502.841	166.889	964.253	582.689	-158.621	970.583	579.348	-0.60552	946.87	544.713	273.989	665.785	603.896	278.858	729.504	376.591	217.62	741.669	388.608	232.25	756.502	302.485	212.868	732.525	216.93	-297.424	703.246	617.417	-271.093	734.248	388.015	-206.76	749.49	396.414	-220.234	759.77	318.778	-199.526	731.836	227.495
254	2.53	3.65635	1132.2	465.524	66.6659	1134.12	505.91	-66.4495	1127.6	502.83	166.907	964.239	582.723	-158.618	970.586	579.346	-0.58876	946.845	544.779	273.99	665.808	603.919	278.866	729.511	376.606	217.625	741.657	388.606	232.28	756.442	302.479	212.862	732.53	216.958	-297.431	703.276	617.437	-271.087	734.222	388.007	-206.784	749.482	396.457	-220.232	759.85	318.801	-199.514	731.833	227.488
255	2.54	3.62819	1132.17	465.529	66.6466	1134.11	505.866	-66.4695	1127.59	502.854	166.9	964.242	582.763	-158.642	970.585	579.377	-0.6269	946.829	544.822	273.987	665.772	603.874	278.846	729.496	376.586	217.594	741.647	388.59	232.276	756.468	302.49	212.842	732.533	216.946	-297.44	703.274	617.458	-271.114	734.212	388.006	-206.818	749.463	396.51	-220.265	759.849	318.856	-199.543	731.829	227.524
256	2.55	3.58245	1132.17	465.469	66.6267	1134.08	505.818	-66.4832	1127.57	502.841	166.885	964.228	582.743	-158.644	970.541	579.367	-0.65859	946.786	544.798	273.992	665.717	603.842	278.844	729.451	376.594	217.574	741.629	388.566	232.232	756.503	302.456	212.826	732.484	216.927	-297.412	703.224	617.392	-271.133	734.204	387.971	-206.828	749.448	396.448	-220.277	759.794	318.833	-199.557	731.816	227.5
257	2.56	3.53694	1132.15	465.474	66.6192	1134.04	505.821	-66.4975	1127.54	502.844	166.88	964.192	582.721	-158.635	970.497	579.369	-0.68237	946.752	544.801	274.019	665.659	603.835	278.837	729.403	376.629	217.576	741.607	388.614	232.199	756.516	302.432	212.818	732.444	216.966	-297.373	703.168	617.351	-271.166	734.19	387.976	-206.862	749.432	396.429	-220.304	759.742	318.815	-199.584	731.802	227.484
258	2.57	3.51352	1132.15	465.535	66.6116	1134.02	505.829	-66.5224	1127.55	502.902	166.872	964.177	582.75	-158.635	970.485	579.399	-0.7063	946.772	544.845	274.063	665.626	603.848	278.821	729.398	376.66	217.577	741.601	388.667	232.189	756.558	302.464	212.829	732.428	217.022	-297.355	703.129	617.34	-271.197	734.204	388.027	-206.913	749.43	396.487	-220.34	759.736	318.87	-199.612	731.806	227.526
259	2.58	3.50988	1132.23	465.412	66.6062	1134.05	505.806	-66.519	1127.57	502.934	166.872	964.193	582.783	-158.613	970.503	579.397	-0.70433	946.858	544.748	274.095	665.622	603.86	278.816	729.427	376.631	217.584	741.624	388.647	232.172	756.592	302.469	212.813	732.463	216.963	-297.32	703.107	617.31	-271.202	734.235	388.048	-206.912	749.453	396.481	-220.333	759.741	318.9	-199.632	731.826	227.549
260	2.59	3.55416	1132.31	465.276	66.6469	1134.08	505.794	-66.4759	1127.6	502.901	166.921	964.204	582.769	-158.579	970.537	579.361	-0.6615	946.919	544.653	274.082	665.656	603.871	278.828	729.463	376.603	217.617	741.662	388.653	232.173	756.607	302.457	212.813	732.507	216.915	-297.299	703.153	617.306	-271.165	734.263	387.984	-206.858	749.496	396.435	-220.277	759.768	318.858	-199.608	731.842	227.525
261	2.6	3.62839	1132.34	465.298	66.69	1134.12	505.84	-66.4272	1127.63	502.871	166.942	964.214	582.768	-158.549	970.577	579.356	-0.60844	946.917	544.686	274.039	665.697	603.894	278.848	729.492	376.631	217.621	741.696	388.649	232.192	756.591	302.465	212.838	732.531	216.94	-297.337	703.237	617.372	-271.135	734.273	387.988	-206.834	749.506	396.507	-220.224	759.811	318.841	-199.577	731.854	227.523
262	2.61	3.65828	1132.36	465.391	66.707	1134.15	505.888	-66.4034	1127.65	502.899	166.961	964.231	582.804	-158.536	970.602	579.386	-0.56351	946.913	544.72	273.997	665.691	603.852	278.834	729.521	376.629	217.621	741.709	388.658	232.237	756.593	302.525	212.846	732.568	216.994	-297.396	703.322	617.495	-271.114	734.275	387.994	-206.715	749.474	396.41	-220.33	759.454	318.614	-199.557	731.867	227.519
263	2.62	3.6851	1132.33	465.441	66.7022	1134.16	505.877	-66.3792	1127.66	502.93	166.992	964.223	582.82	-158.525	970.608	579.408	-0.53758	946.896	544.709	273.97	665.645	603.794	278.827	729.526	376.614	217.607	741.716	388.626	232.283	756.568	302.561	212.849	732.574	217.005	-297.428	703.35	617.528	-271.089	734.274	387.993	-206.583	749.416	396.214	-220.476	758.988	318.319	-199.537	731.866	227.489
264	2.63	3.72149	1132.25	465.509	66.7044	1134.14	505.841	-66.3755	1127.62	502.901	166.999	964.181	582.77	-158.502	970.579	579.383	-0.5024	946.844	544.751	273.973	665.637	603.795	278.838	729.495	376.588	217.605	741.69	388.601	232.289	756.514	302.512	212.855	732.541	216.958	-297.422	703.328	617.482	-271.08	734.241	387.985	-206.63	749.408	396.23	-220.39	759.253	318.473	-199.518	731.85	227.475
265	2.64	3.72415	1132.17	465.679	66.7228	1134.11	505.892	-66.3821	1127.58	502.905	167.018	964.141	582.754	-158.487	970.537	579.375	-0.48573	946.754	544.874	274.018	665.63	603.818	278.856	729.446	376.614	217.622	741.631	388.639	232.299	756.482	302.488	212.86	732.5	216.988	-297.404	703.297	617.436	-271.087	734.207	387.981	-206.498	749.248	396.059	-220.642	758.513	317.995	-199.533	731.825	227.477
266	2.65	3.68145	1132.15	465.717	66.7428	1134.09	505.942	-66.4	1127.57	502.924	167.028	964.116	582.767	-158.466	970.512	579.378	-0.51357	946.692	544.943	274.075	665.581	603.782	278.878	729.415	376.655	217.629	741.605	388.644	232.281	756.507	302.5	212.874	732.477	217.051	-297.362	703.25	617.38	-271.114	734.201	387.994	-206.577	749.276	396.187	-220.604	758.699	318.163	-199.557	731.812	227.509
267	2.66	3.62872	1132.21	465.584	66.7356	1134.08	505.926	-66.4113	1127.59	502.946	167.024	964.113	582.772	-158.458	970.512	579.397	-0.54619	946.715	544.901	274.118	665.551	603.804	278.88	729.394	376.667	217.652	741.617	388.675	232.218	756.552	302.462	212.876	732.459	217.071	-297.304	703.213	617.341	-271.135	734.218	387.994	-206.762	749.414	396.408	-220.362	759.513	318.695	-199.572	731.815	227.522
268	2.67	3.62088	1132.26	465.471	66.7279	1134.06	505.915	-66.4047	1127.61	502.943	167.022	964.122	582.798	-158.452	970.514	579.392	-0.54548	946.754	544.815	274.162	665.528	603.839	278.862	729.395	376.654	217.661	741.626	388.705	232.179	756.58	302.408	212.867	732.454	217.049	-297.287	703.22	617.345	-271.15	734.239	387.988	-206.829	749.477	396.474	-220.314	759.72	318.818	-199.584	731.825	227.49
269	2.68	3.62886	1132.3	465.377	66.7274	1134.08	505.89	-66.3905	1127.62	502.954	167.013	964.132	582.804	-158.451	970.52	579.384	-0.54602	946.781	544.76	274.151	665.554	603.893	278.857	729.428	376.659	217.64	741.633	388.677	232.168	756.582	302.43	212.848	732.48	217.016	-297.294	703.278	617.428	-271.148	734.262	388.011	-206.857	749.504	396.482	-220.301	759.767	318.831	-199.587	731.834	227.471
270	2.69	3.646	1132.34	465.325	66.7332	1134.09	505.849	-66.3706	1127.63	502.93	167.006	964.145	582.768	-158.452	970.551	579.377	-0.56128	946.8	544.729	274.125	665.561	603.87	278.837	729.455	376.63	217.615	741.657	388.646	232.168	756.594	302.465	212.822	732.522	216.958	-297.314	703.341	617.452	-271.143	734.274	388.013	-206.755	749.472	396.328	-220.405	759.429	318.553	-199.576	731.863	227.475
271	2.7	3.65844	1132.33	465.328	66.7309	1134.11	505.813	-66.3668	1127.65	502.899	167	964.159	582.759	-158.467	970.591	579.355	-0.5745	946.815	544.73	274.072	665.538	603.77	278.813	729.479	376.568	217.596	741.675	388.633	232.175	756.591	302.483	212.784	732.563	216.927	-297.372	703.412	617.481	-271.162	734.292	387.987	-206.582	749.351	396.048	-220.678	758.591	318.005	-199.575	731.879	227.478
272	2.71	3.68909	1132.27	465.372	66.7294	1134.09	505.803	-66.3649	1127.64	502.862	166.99	964.15	582.73	-158.473	970.609	579.341	-0.56292	946.778	544.782	274.026	665.535	603.718	278.8	729.491	376.551	217.565	741.676	388.609	232.189	756.547	302.479	212.754	732.574	216.902	-297.433	703.446	617.477	-271.164	734.294	387.948	-206.619	749.377	396.094	-220.635	758.762	318.136	-199.588	731.867	227.489
273	2.72	3.73048	1132.15	465.466	66.7467	1134.05	505.809	-66.3438	1127.6	502.857	166.997	964.128	582.744	-158.467	970.596	579.338	-0.52709	946.686	544.87	273.996	665.531	603.704	278.801	729.47	376.571	217.544	741.66	388.586	232.232	756.476	302.515	212.764	732.547	216.931	-297.449	703.454	617.47	-271.159	734.267	387.944	-206.778	749.497	396.338	-220.384	759.561	318.617	-199.581	731.849	227.47
274	2.73	3.73378	1132.07	465.491	66.7625	1134.01	505.794	-66.332	1127.55	502.824	167.008	964.107	582.753	-158.463	970.55	579.358	-0.50785	946.651	544.881	274.001	665.469	603.662	278.808	729.438	376.594	217.552	741.633	388.582	232.265	756.459	302.501	212.792	732.509	216.967	-297.432	703.42	617.456	-271.161	734.241	387.957	-206.828	749.49	396.389	-220.327	759.747	318.752	-199.579	731.818	227.48
275	2.74	3.71909	1132.04	465.461	66.7593	1133.96	505.738	-66.3321	1127.51	502.773	167.013	964.088	582.727	-158.451	970.519	579.368	-0.5261	946.652	544.867	274.057	665.424	603.662	278.828	729.416	376.63	217.582	741.611	388.625	232.268	756.48	302.491	212.814	732.475	216.987	-297.392	703.372	617.436	-271.172	734.231	387.972	-206.78	749.428	396.269	-220.444	759.392	318.581	-199.595	731.814	227.485
276	2.75	3.73624	1132.03	465.384	66.7914	1133.93	505.746	-66.3255	1127.49	502.766	167.023	964.063	582.707	-158.424	970.504	579.367	-0.51667	946.633	544.887	274.119	665.44	603.719	278.861	729.394	376.673	217.612	741.595	388.654	232.224	756.5	302.471	212.858	732.454	217.026	-297.336	703.313	617.367	-271.17	734.209	387.974	-206.611	749.279	396.036	-220.72	758.508	318.057	-199.591	731.817	227.487
277	2.76	3.77311	1132.04	465.297	66.8397	1133.92	505.756	-66.3078	1127.48	502.751	167.046	964.052	582.724	-158.386	970.489	579.345	-0.49141	946.669	544.861	274.157	665.413	603.734	278.906	729.392	376.716	217.658	741.607	388.71	232.214	756.508	302.49	212.903	732.458	217.063	-297.3	703.292	617.349	-271.151	734.213	387.985	-206.62	749.307	396.116	-220.642	758.686	318.16	-199.579	731.81	227.488
278	2.77	3.79441	1132.06	465.191	66.8543	1133.9	505.738	-66.3025	1127.48	502.72	167.067	964.051	582.75	-158.36	970.492	579.324	-0.47126	946.703	544.807	274.168	665.396	603.745	278.922	729.409	376.729	217.686	741.623	388.735	232.216	756.531	302.499	212.911	732.48	217.066	-297.285	703.291	617.372	-271.155	734.235	387.996	-206.777	749.464	396.354	-220.361	759.542	318.669	-199.571	731.815	227.495
279	2.78	3.80736	1132.07	465.144	66.8393	1133.9	505.668	-66.2981	1127.48	502.681	167.066	964.057	582.727	-158.368	970.516	579.314	-0.46178	946.73	544.787	274.15	665.397	603.726	278.919	729.443	376.72	217.686	741.646	388.697	232.231	756.554	302.487	212.899	732.51	217.036	-297.324	703.329	617.41	-271.148	734.259	387.986	-206.737	749.47	396.268	-220.4	759.389	318.512	-199.564	731.839	227.486
280	2.79	3.82222	1132.06	465.091	66.8256	1133.92	505.617	-66.2809	1127.46	502.621	167.06	964.064	582.69	-158.387	970.544	579.301	-0.43895	946.743	544.782	274.128	665.401	603.721	278.898	729.466	376.676	217.669	741.671	388.687	232.237	756.586	302.503	212.869	732.547	216.992	-297.365	703.365	617.427	-271.141	734.275	387.987	-206.543	749.36	395.981	-220.644	758.572	317.984	-199.551	731.856	227.508
281	2.8	3.81995	1132.02	465.001	66.796	1133.92	505.522	-66.27	1127.44	502.582	167.063	964.065	582.689	-158.4	970.562	579.294	-0.44377	946.73	544.75	274.082	665.438	603.747	278.853	729.478	376.633	217.629	741.675	388.643	232.213	756.566	302.467	212.827	732.554	216.949	-297.392	703.411	617.444	-271.146	734.273	387.988	-206.508	749.306	395.915	-220.715	758.355	317.865	-199.55	731.849	227.506
282	2.81	3.78619	1131.95	465.016	66.7728	1133.9	505.455	-66.285	1127.4	502.587	167.033	964.06	582.687	-158.414	970.562	579.29	-0.47582	946.696	544.767	274.041	665.449	603.719	278.815	729.478	376.58	217.569	741.669	388.612	232.191	756.564	302.466	212.778	732.549	216.922	-297.415	703.445	617.467	-271.163	734.264	388.002	-206.521	749.272	395.914	-220.758	758.287	317.85	-199.564	731.839	227.513
283	2.82	3.71738	1131.89	465.007	66.7569	1133.84	505.429	-66.3215	1127.36	502.605	167.008	964.052	582.685	-158.423	970.56	579.297	-0.51197	946.663	544.819	274.045	665.41	603.677	278.794	729.46	376.548	217.543	741.653	388.609	232.186	756.57	302.495	212.758	732.537	216.931	-297.426	703.455	617.461	-271.179	734.261	387.975	-206.632	749.338	396.037	-220.673	758.662	318.1	-199.594	731.847	227.513
284	2.83	3.66284	1131.84	464.926	66.7584	1133.79	505.426	-66.3391	1127.33	502.578	167.017	964.03	582.666	-158.415	970.538	579.28	-0.52363	946.638	544.813	274.076	665.378	603.664	278.82	729.427	376.589	217.558	741.624	388.618	232.166	756.543	302.469	212.784	732.503	216.956	-297.401	703.435	617.445	-271.178	734.247	387.968	-206.734	749.403	396.173	-220.553	759.121	318.42	-199.592	731.841	227.482
285	2.84	3.67039	1131.78	464.897	66.7991	1133.74	505.442	-66.3237	1127.29	502.553	167.046	963.995	582.642	-158.378	970.488	579.265	-0.50756	946.614	544.829	274.112	665.343	603.648	278.853	729.387	376.632	217.617	741.581	388.656	232.167	756.487	302.447	212.84	732.462	217.013	-297.348	703.41	617.408	-271.155	734.221	387.956	-206.678	749.336	396.1	-220.626	758.844	318.23	-199.575	731.811	227.449
286	2.85	3.70917	1131.72	464.939	66.826	1133.69	505.473	-66.319	1127.25	502.527	167.069	963.964	582.626	-158.343	970.466	579.267	-0.47849	946.599	544.843	274.131	665.331	603.68	278.896	729.356	376.682	217.662	741.559	388.712	232.21	756.433	302.493	212.886	732.436	217.063	-297.315	703.39	617.391	-271.146	734.208	387.97	-206.71	749.371	396.205	-220.51	759.158	318.393	-199.562	731.787	227.434
287	2.86	3.69402	1131.71	464.935	66.8239	1133.69	505.436	-66.3322	1127.24	502.484	167.068	963.97	582.622	-158.347	970.482	579.27	-0.4669	946.605	544.826	274.153	665.311	603.669	278.908	729.369	376.692	217.667	741.569	388.695	232.235	756.454	302.531	212.884	732.455	217.06	-297.315	703.388	617.368	-271.158	734.216	387.993	-206.577	749.281	396.024	-220.752	758.48	317.948	-199.572	731.805	227.457
288	2.87	3.65323	1131.71	464.838	66.7799	1133.68	505.371	-66.3599	1127.24	502.484	167.046	963.978	582.616	-158.355	970.496	579.234	-0.48492	946.626	544.777	274.136	665.314	603.655	278.88	729.385	376.657	217.626	741.598	388.635	232.192	756.504	302.495	212.868	732.479	217.012	-297.353	703.419	617.406	-271.187	734.227	387.997	-206.65	749.341	396.095	-220.687	758.697	318.102	-199.596	731.821	227.454
289	2.88	3.62781	1131.73	464.765	66.7401	1133.7	505.31	-66.3654	1127.24	502.492	167.034	963.99	582.594	-158.368	970.501	579.207	-0.49961	946.643	544.703	274.09	665.3	603.622	278.832	729.406	376.604	217.6	741.623	388.636	232.165	756.543	302.438	212.821	732.5	216.955	-297.394	703.45	617.424	-271.187	734.243	387.997	-206.836	749.481	396.343	-220.418	759.51	318.615	-199.608	731.823	227.459
290	2.89	3.59497	1131.75	464.713	66.7088	1133.73	505.244	-66.3763	1127.22	502.471	167.029	964.01	582.6	-158.385	970.527	579.204	-0.51977	946.648	544.675	274.056	665.312	603.604	278.792	729.432	376.56	217.579	741.651	388.646	232.165	756.585	302.441	212.767	732.531	216.917	-297.439	703.464	617.427	-271.205	734.257	387.977	-206.884	749.521	396.422	-220.342	759.719	318.745	-199.618	731.83	227.484
291	2.9	3.55517	1131.75	464.624	66.6847	1133.73	505.168	-66.3884	1127.23	502.472	167.003	964.02	582.589	-158.415	970.546	579.23	-0.52811	946.653	544.718	274.034	665.322	603.588	278.758	729.466	376.532	217.546	741.662	388.612	232.166	756.62	302.444	212.726	732.559	216.886	-297.466	703.478	617.455	-271.211	734.285	387.945	-206.822	749.481	396.31	-220.444	759.408	318.568	-199.622	731.853	227.475
292	2.91	3.58834	1131.72	464.639	66.6828	1133.71	505.135	-66.3644	1127.24	502.47	167.012	964.018	582.565	-158.4	970.54	579.231	-0.49751	946.665	544.723	274.029	665.327	603.597	278.774	729.464	376.522	217.551	741.666	388.607	232.193	756.615	302.47	212.752	732.562	216.857	-297.452	703.481	617.448	-271.186	734.286	387.953	-206.691	749.427	396.13	-220.572	758.927	318.285	-199.591	731.857	227.456
293	2.92	3.64687	1131.68	464.709	66.7256	1133.67	505.195	-66.3273	1127.22	502.437	167.07	964.014	582.574	-158.349	970.516	579.243	-0.43984	946.664	544.73	274.059	665.329	603.626	278.839	729.445	376.574	217.612	741.657	388.659	232.222	756.566	302.513	212.837	732.537	216.964	-297.402	703.477	617.444	-271.142	734.255	387.99	-206.756	749.539	396.322	-220.323	759.594	318.712	-199.55	731.856	227.477
294	2.93	3.68226	1131.63	464.798	66.7892	1133.64	505.268	-66.3055	1127.2	502.413	167.109	963.999	582.628	-158.315	970.5	579.258	-0.40708	946.668	544.767	274.109	665.303	603.643	278.896	729.424	376.65	217.668	741.639	388.691	232.273	756.5	302.573	212.922	732.522	217.087	-297.351	703.449	617.445	-271.129	734.238	388.014	-206.768	749.556	396.369	-220.257	759.784	318.786	-199.534	731.848	227.49
295	2.94	3.67683	1131.6	464.814	66.8133	1133.6	505.302	-66.3107	1127.18	502.407	167.108	963.973	582.637	-158.311	970.464	579.273	-0.40707	946.669	544.78	274.142	665.292	603.66	278.936	729.403	376.71	217.69	741.602	388.69	232.28	756.466	302.53	212.961	732.5	217.126	-297.319	703.396	617.412	-271.117	734.228	388.001	-206.717	749.477	396.277	-220.386	759.444	318.563	-199.537	731.831	227.481
296	2.95	3.66688	1131.56	464.778	66.8071	1133.56	505.276	-66.3173	1127.13	502.39	167.097	963.947	582.606	-158.318	970.424	579.258	-0.421	946.631	544.784	274.162	665.285	603.67	278.941	729.372	376.734	217.69	741.574	388.678	232.269	756.446	302.501	212.966	732.469	217.12	-297.292	703.346	617.375	-271.117	734.218	387.976	-206.626	749.347	396.144	-220.554	758.948	318.263	-199.538	731.806	227.451
297	2.96	3.64069	1131.53	464.767	66.7728	1133.53	505.24	-66.3385	1127.09	502.38	167.078	963.944	582.587	-158.344	970.417	579.234	-0.44652	946.584	544.828	274.16	665.301	603.68	278.919	729.361	376.725	217.666	741.56	388.672	232.231	756.456	302.488	212.916	732.449	217.088	-297.303	703.311	617.345	-271.135	734.207	387.969	-206.809	749.416	396.411	-220.368	759.55	318.687	-199.561	731.776	227.461
298	2.97	3.56718	1131.49	464.772	66.6987	1133.52	505.2	-66.3931	1127.06	502.427	167.022	963.954	582.59	-158.402	970.418	579.231	-0.49995	946.566	544.896	274.131	665.328	603.672	278.846	729.37	376.666	217.605	741.563	388.661	232.176	756.478	302.491	212.849	732.444	217.05	-297.352	703.316	617.362	-271.19	734.196	388.004	-206.905	749.44	396.512	-220.373	759.669	318.812	-199.617	731.774	227.487
299	2.98	3.50381	1131.48	464.748	66.6406	1133.54	505.178	-66.436	1127.06	502.443	166.97	963.973	582.594	-158.466	970.463	579.213	-0.56283	946.581	544.883	274.089	665.352	603.661	278.777	729.387	376.591	217.54	741.593	388.638	232.106	756.518	302.475	212.758	732.477	216.968	-297.404	703.351	617.375	-271.24	734.209	388.01	-206.893	749.385	396.41	-220.53	759.314	318.576	-199.663	731.787	227.485
300	2.99	3.48735	1131.52	464.667	66.6106	1133.59	505.093	-66.4465	1127.07	502.401	166.954	963.997	582.577	-158.496	970.522	579.19	-0.57399	946.633	544.817	274.06	665.365	603.632	278.758	729.424	376.537	217.51	741.633	388.618	232.094	756.537	302.45	212.708	732.524	216.877	-297.428	703.423	617.427	-271.235	734.229	387.998	-206.778	749.344	396.196	-220.669	758.874	318.253	-199.663	731.807	227.474
301	3	3.52162	1131.54	464.653	66.6282	1133.62	505.104	-66.425	1127.08	502.386	166.983	964.02	582.569	-158.48	970.565	579.18	-0.54354	946.686	544.775	274.04	665.381	603.629	278.772	729.463	376.547	217.54	741.663	388.633	232.134	756.575	302.46	212.735	732.552	216.879	-297.426	703.489	617.47	-271.208	734.267	388.009	-206.856	749.489	396.343	-220.404	759.554	318.656	-199.629	731.836	227.458
302	3.01	3.55367	1131.57	464.585	66.6631	1133.6	505.098	-66.3835	1127.09	502.358	167.017	964.023	582.59	-158.447	970.583	579.162	-0.48968	946.755	544.753	274.045	665.395	603.655	278.797	729.469	376.583	217.58	741.666	388.66	232.172	756.581	302.467	212.777	732.555	216.911	-297.4	703.536	617.501	-271.176	734.298	387.975	-206.839	749.553	396.402	-220.297	759.751	318.733	-199.589	731.858	227.453
303	3.02	3.57115	1131.59	464.53	66.6899	1133.59	505.114	-66.3623	1127.09	502.33	167.058	964.043	582.603	-158.426	970.597	579.159	-0.43303	946.82	544.702	274.087	665.368	603.657	278.834	729.461	376.616	217.615	741.658	388.646	232.199	756.581	302.462	212.827	732.557	216.964	-297.367	703.542	617.513	-271.142	734.303	387.921	-206.723	749.535	396.261	-220.38	759.458	318.493	-199.565	731.876	227.428
304	3.03	3.56517	1131.54	464.593	66.7094	1133.55	505.19	-66.3582	1127.07	502.358	167.096	964.039	582.633	-158.41	970.59	579.195	-0.4259	946.817	544.804	274.134	665.344	603.672	278.882	729.44	376.678	217.638	741.641	388.655	232.204	756.524	302.469	212.872	732.524	217.037	-297.335	703.529	617.503	-271.127	734.288	387.926	-206.634	749.449	396.141	-220.532	759.001	318.232	-199.566	731.866	227.45
305	3.04	3.55947	1131.41	464.756	66.725	1133.47	505.232	-66.3727	1127.01	502.409	167.113	964.004	582.65	-158.383	970.569	579.212	-0.43483	946.754	544.914	274.176	665.323	603.673	278.902	729.393	376.716	217.666	741.592	388.695	232.232	756.44	302.497	212.916	732.461	217.096	-297.312	703.466	617.409	-271.123	734.24	387.968	-206.684	749.419	396.274	-220.475	759.222	318.461	-199.565	731.821	227.483
306	3.05	3.56284	1131.29	464.867	66.7291	1133.41	505.218	-66.3666	1126.94	502.421	167.133	963.966	582.631	-158.369	970.553	579.213	-0.42843	946.708	544.995	274.195	665.332	603.69	278.899	729.356	376.719	217.684	741.526	388.692	232.269	756.42	302.517	212.936	732.417	217.118	-297.31	703.445	617.373	-271.11	734.197	388.007	-206.612	749.273	396.201	-220.592	758.847	318.269	-199.544	731.773	227.487
307	3.06	3.5616	1131.28	464.895	66.7211	1133.39	505.22	-66.3768	1126.92	502.453	167.136	963.957	582.623	-158.387	970.581	579.224	-0.41711	946.718	545.021	274.177	665.345	603.709	278.897	729.371	376.719	217.663	741.533	388.689	232.265	756.43	302.489	212.907	732.429	217.099	-297.34	703.463	617.376	-271.118	734.189	388.028	-206.772	749.373	396.413	-220.38	759.534	318.716	-199.536	731.751	227.498
308	3.07	3.52489	1131.36	464.745	66.689	1133.42	505.161	-66.4095	1126.93	502.484	167.107	963.997	582.634	-158.424	970.64	579.211	-0.44077	946.769	545.019	274.145	665.355	603.688	278.86	729.415	376.663	217.623	741.582	388.669	232.235	756.491	302.461	212.857	732.468	217.06	-297.399	703.536	617.458	-271.14	734.216	388.015	-206.758	749.39	396.331	-220.441	759.325	318.578	-199.568	731.783	227.528
309	3.08	3.47994	1131.46	464.564	66.6449	1133.48	505.065	-66.4102	1126.95	502.471	167.097	964.046	582.613	-158.456	970.724	579.178	-0.44127	946.876	544.908	274.112	665.379	603.656	278.821	729.46	376.607	217.59	741.638	388.611	232.219	756.547	302.47	212.809	732.522	216.975	-297.451	703.616	617.511	-271.142	734.258	387.979	-206.678	749.376	396.161	-220.563	758.898	318.284	-199.58	731.817	227.494
310	3.09	3.47528	1131.52	464.485	66.6335	1133.52	505.01	-66.3995	1126.99	502.438	167.109	964.069	582.585	-158.469	970.802	579.125	-0.42776	946.998	544.736	274.105	665.41	603.668	278.802	729.492	376.574	217.582	741.673	388.578	232.204	756.605	302.483	212.778	732.566	216.888	-297.455	703.687	617.506	-271.14	734.315	387.97	-206.718	749.472	396.214	-220.451	759.21	318.429	-199.566	731.861	227.455
311	3.1	3.48344	1131.51	464.518	66.6411	1133.55	505.028	-66.4046	1127.01	502.455	167.107	964.077	582.599	-158.489	970.857	579.108	-0.43277	947.052	544.715	274.093	665.378	603.622	278.79	729.495	376.568	217.579	741.687	388.588	232.181	756.624	302.456	212.775	732.582	216.88	-297.456	703.733	617.501	-271.155	734.352	387.955	-206.558	749.396	395.969	-220.666	758.522	317.967	-199.572	731.874	227.443
312	3.11	3.47027	1131.48	464.549	66.6456	1133.51	505.065	-66.426	1127.03	502.472	167.08	964.065	582.585	-158.517	970.867	579.112	-0.43854	947.034	544.776	274.086	665.356	603.618	278.794	729.484	376.588	217.575	741.678	388.598	232.141	756.595	302.444	212.759	732.564	216.901	-297.47	703.756	617.507	-271.174	734.337	387.941	-206.54	749.358	395.913	-220.745	758.335	317.869	-199.585	731.862	227.445
313	3.12	3.48605	1131.42	464.563	66.6779	1133.44	505.095	-66.4016	1127.01	502.453	167.099	964.022	582.581	-158.499	970.834	579.098	-0.41807	946.995	544.832	274.112	665.355	603.646	278.81	729.438	376.611	217.596	741.635	388.618	232.141	756.524	302.464	212.788	732.512	216.952	-297.435	703.75	617.476	-271.163	734.305	387.915	-206.591	749.386	395.958	-220.64	758.667	318.056	-199.582	731.853	227.423
314	3.13	3.5241	1131.37	464.676	66.7299	1133.38	505.14	-66.3748	1126.96	502.434	167.129	964.001	582.591	-158.475	970.82	579.091	-0.39897	946.959	544.891	274.149	665.343	603.64	278.848	729.387	376.657	217.625	741.596	388.659	232.203	756.473	302.514	212.847	732.454	217.024	-297.405	703.731	617.451	-271.154	734.262	387.935	-206.768	749.49	396.257	-220.384	759.51	318.597	-199.573	731.829	227.429
315	3.14	3.54814	1131.32	464.793	66.7622	1133.33	505.197	-66.3761	1126.94	502.447	167.129	963.994	582.583	-158.489	970.818	579.104	-0.44168	946.906	544.989	274.177	665.356	603.675	278.858	729.368	376.681	217.623	741.561	388.639	232.211	756.462	302.505	212.859	732.439	217.045	-297.411	703.708	617.431	-271.175	734.232	387.965	-206.886	749.489	396.431	-220.353	759.718	318.769	-199.583	731.81	227.469
316	3.15	3.57248	1131.29	464.805	66.7807	1133.31	505.175	-66.3503	1126.94	502.443	167.12	963.99	582.532	-158.502	970.825	579.085	-0.4489	946.915	544.977	274.169	665.348	603.648	278.852	729.373	376.654	217.622	741.561	388.612	232.218	756.467	302.484	212.867	732.448	217.053	-297.435	703.725	617.444	-271.189	734.226	387.945	-206.83	749.417	396.316	-220.478	759.375	318.565	-199.588	731.787	227.455
317	3.16	3.63517	1131.3	464.772	66.8072	1133.31	505.123	-66.2897	1126.94	502.402	167.133	963.998	582.509	-158.504	970.852	579.062	-0.40585	946.955	544.955	274.145	665.364	603.649	278.847	729.396	376.615	217.623	741.575	388.608	232.248	756.456	302.501	212.879	732.461	217.028	-297.455	703.747	617.424	-271.163	734.227	387.937	-206.611	749.274	396.037	-220.712	758.51	317.978	-199.562	731.759	227.447
318	3.17	3.67723	1131.29	464.802	66.8236	1133.31	505.111	-66.2629	1126.93	502.394	167.125	964.023	582.523	-158.521	970.893	579.051	-0.41299	946.967	544.984	274.103	665.434	603.72	278.826	729.428	376.612	217.595	741.6	388.617	232.238	756.466	302.498	212.828	732.493	216.996	-297.509	703.819	617.496	-271.145	734.22	387.946	-206.556	749.246	395.989	-220.752	758.299	317.864	-199.564	731.759	227.494
319	3.18	3.68676	1131.32	464.757	66.8237	1133.35	505.101	-66.2451	1126.95	502.39	167.101	964.056	582.493	-158.556	970.943	579.026	-0.43356	947.042	544.921	274.083	665.473	603.735	278.772	729.46	376.562	217.563	741.641	388.618	232.189	756.52	302.478	212.776	732.53	216.962	-297.567	703.912	617.566	-271.171	734.253	387.981	-206.637	749.345	396.104	-220.657	758.648	318.114	-199.58	731.793	227.49
320	3.19	3.72877	1131.39	464.658	66.8459	1133.36	505.097	-66.1953	1126.98	502.327	167.107	964.093	582.488	-158.563	970.993	579.018	-0.42657	947.161	544.769	274.086	665.471	603.713	278.779	729.492	376.548	217.553	741.682	388.6	232.16	756.594	302.446	212.748	732.57	216.88	-297.574	703.939	617.556	-271.177	734.303	387.948	-206.719	749.474	396.182	-220.506	759.155	318.401	-199.58	731.834	227.454
321	3.2	3.79787	1131.42	464.627	66.8942	1133.33	505.098	-66.1579	1126.99	502.281	167.133	964.112	582.476	-158.544	971.027	578.994	-0.40147	947.251	544.63	274.099	665.457	603.694	278.815	729.512	376.565	217.577	741.703	388.58	232.172	756.616	302.458	212.76	732.576	216.883	-297.542	703.938	617.505	-271.155	734.341	387.91	-206.559	749.404	395.954	-220.675	758.526	317.914	-199.563	731.853	227.429
322	3.21	3.86507	1131.42	464.582	66.9548	1133.29	505.145	-66.1217	1126.98	502.27	167.167	964.114	582.477	-158.514	971.038	578.98	-0.37844	947.268	544.645	274.135	665.443	603.685	278.839	729.496	376.586	217.632	741.687	388.613	232.185	756.631	302.449	212.811	732.561	216.921	-297.513	703.942	617.492	-271.141	734.346	387.916	-206.512	749.365	395.898	-220.688	758.349	317.817	-199.548	731.862	227.429
323	3.22	3.92308	1131.39	464.6	67.0202	1133.26	505.19	-66.0805	1126.95	502.241	167.189	964.1	582.496	-158.489	971.027	578.96	-0.35869	947.251	544.691	274.167	665.423	603.68	278.87	729.46	376.604	217.67	741.662	388.626	232.19	756.597	302.439	212.86	732.518	216.948	-297.486	703.944	617.474	-271.14	734.341	387.874	-206.572	749.416	395.95	-220.577	758.685	318.05	-199.545	731.86	227.417
324	3.23	3.94081	1131.32	464.671	67.0898	1133.21	505.256	-66.0623	1126.93	502.218	167.208	964.085	582.485	-158.476	971.012	578.946	-0.34953	947.226	544.741	274.211	665.366	603.636	278.897	729.414	376.626	217.685	741.638	388.64	232.192	756.544	302.444	212.884	732.473	216.972	-297.454	703.92	617.42	-271.132	734.325	387.887	-206.751	749.552	396.236	-220.33	759.548	318.6	-199.55	731.844	227.416
325	3.24	3.94416	1131.23	464.806	67.1071	1133.16	505.305	-66.0611	1126.91	502.264	167.228	964.072	582.519	-158.47	970.998	578.956	-0.34945	947.162	544.881	274.238	665.363	603.612	278.899	729.387	376.666	217.682	741.596	388.638	232.212	756.512	302.474	212.875	732.454	217.023	-297.465	703.927	617.433	-271.144	734.294	387.968	-206.812	749.553	396.365	-220.297	759.743	318.786	-199.565	731.816	227.451
326	3.25	3.98457	1131.15	464.959	67.1003	1133.13	505.298	-66.0573	1126.87	502.308	167.22	964.067	582.559	-158.475	970.999	578.957	-0.3333	947.114	544.957	274.234	665.433	603.671	278.896	729.387	376.701	217.675	741.589	388.652	232.228	756.475	302.501	212.862	732.446	217.069	-297.5	703.968	617.466	-271.138	734.271	387.986	-206.84	749.523	396.423	-220.302	759.768	318.856	-199.564	731.782	227.45
327	3.26	4.01665	1131.11	465.01	67.1107	1133.13	505.311	-66.0339	1126.85	502.277	167.224	964.068	582.53	-158.487	971.013	578.953	-0.31279	947.125	544.936	274.192	665.487	603.695	278.862	729.403	376.645	217.655	741.601	388.643	232.198	756.47	302.469	212.849	732.472	217.041	-297.53	703.975	617.414	-271.129	734.27	387.944	-206.824	749.52	396.389	-220.288	759.787	318.834	-199.554	731.763	227.446
328	3.27	3.99385	1131.14	464.972	67.0866	1133.17	505.283	-66.0364	1126.85	502.267	167.216	964.098	582.509	-158.52	971.047	578.958	-0.32414	947.156	544.898	274.151	665.527	603.677	278.817	729.423	376.592	217.613	741.62	388.592	232.188	756.492	302.46	212.816	732.511	216.963	-297.588	704.05	617.466	-271.131	734.266	387.917	-206.751	749.469	396.27	-220.404	759.419	318.569	-199.566	731.783	227.436
329	3.28	3.97002	1131.16	464.913	67.0318	1133.19	505.22	-66.0487	1126.84	502.299	167.206	964.127	582.524	-158.557	971.098	578.991	-0.36035	947.192	544.918	274.13	665.557	603.684	278.789	729.449	376.568	217.565	741.644	388.546	232.166	756.54	302.433	212.765	732.527	216.907	-297.636	704.137	617.58	-271.168	734.284	387.921	-206.619	749.34	396.025	-220.697	758.542	318.004	-199.587	731.803	227.43
330	3.29	3.94898	1131.18	464.83	67.0161	1133.19	505.185	-66.0449	1126.86	502.307	167.211	964.145	582.542	-158.563	971.127	578.992	-0.3756	947.26	544.812	274.154	665.557	603.71	278.774	729.459	376.541	217.56	741.662	388.552	232.14	756.58	302.418	212.725	732.524	216.849	-297.628	704.155	617.574	-271.201	734.317	387.933	-206.658	749.404	396.02	-220.655	758.706	318.104	-199.594	731.817	227.428
331	3.3	3.92851	1131.21	464.796	67.0434	1133.18	505.188	-66.0453	1126.88	502.305	167.234	964.165	582.549	-158.542	971.152	578.978	-0.38055	947.309	544.713	274.213	665.541	603.728	278.784	729.468	376.547	217.589	741.678	388.589	232.125	756.598	302.417	212.728	732.52	216.845	-297.579	704.148	617.504	-271.197	734.335	387.911	-206.721	749.502	396.101	-220.52	759.132	318.369	-199.595	731.834	227.421
332	3.31	3.89627	1131.23	464.833	67.0526	1133.17	505.202	-66.0586	1126.89	502.34	167.268	964.176	582.59	-158.51	971.165	578.985	-0.37894	947.327	544.742	274.28	665.533	603.743	278.808	729.458	376.57	217.615	741.687	388.623	232.124	756.606	302.426	212.749	732.521	216.889	-297.544	704.144	617.517	-271.186	734.34	387.94	-206.624	749.405	395.951	-220.739	758.476	317.946	-199.606	731.842	227.443
333	3.32	3.91649	1131.25	464.804	67.0982	1133.16	505.212	-66.0405	1126.88	502.351	167.32	964.175	582.598	-158.47	971.176	578.98	-0.34651	947.337	544.731	274.337	665.513	603.747	278.85	729.437	376.626	217.665	741.68	388.625	232.151	756.612	302.415	212.816	732.492	216.957	-297.507	704.148	617.514	-271.17	734.342	387.933	-206.578	749.393	395.912	-220.764	758.326	317.838	-199.589	731.837	227.449
334	3.33	3.9906	1131.25	464.742	67.1651	1133.16	505.243	-65.9872	1126.86	502.361	167.388	964.178	582.599	-158.416	971.185	578.957	-0.26255	947.356	544.705	274.373	665.51	603.772	278.921	729.435	376.659	217.732	741.676	388.626	232.208	756.581	302.423	212.873	732.484	216.971	-297.463	704.147	617.484	-271.111	734.34	387.874	-206.496	749.393	395.828	-220.714	758.303	317.757	-199.549	731.841	227.396
335	3.34	4.04733	1131.22	464.817	67.1844	1133.16	505.287	-65.9607	1126.83	502.396	167.413	964.176	582.605	-158.404	971.199	578.972	-0.18978	947.346	544.762	274.366	665.512	603.753	278.948	729.451	376.658	217.766	741.686	388.665	232.242	756.554	302.447	212.895	732.508	216.984	-297.475	704.186	617.497	-271.094	734.328	387.894	-206.457	749.395	395.843	-220.703	758.304	317.746	-199.531	731.839	227.4
336	3.35	4.04603	1131.2	464.932	67.1513	1133.17	505.32	-65.9721	1126.84	502.437	167.394	964.177	582.594	-158.425	971.219	578.988	-0.20266	947.331	544.818	274.347	665.559	603.75	278.924	729.458	376.648	217.732	741.691	388.671	232.249	756.518	302.474	212.873	732.531	217.007	-297.524	704.233	617.537	-271.11	734.317	387.909	-206.468	749.382	395.922	-220.732	758.317	317.808	-199.54	731.831	227.442
337	3.36	4.04155	1131.18	464.966	67.13	1133.17	505.301	-65.9738	1126.83	502.442	167.388	964.182	582.591	-158.444	971.233	578.996	-0.20685	947.295	544.832	274.312	665.572	603.687	278.895	729.461	376.603	217.689	741.674	388.62	232.222	756.504	302.441	212.84	732.536	216.964	-297.572	704.253	617.51	-271.106	734.31	387.905	-206.541	749.411	396.039	-220.62	758.679	318.079	-199.541	731.812	227.419
338	3.37	4.03585	1131.13	464.962	67.1129	1133.16	505.251	-65.9675	1126.8	502.385	167.392	964.182	582.575	-158.455	971.244	578.972	-0.19121	947.244	544.833	274.294	665.572	603.638	278.874	729.439	376.548	217.669	741.662	388.584	232.23	756.489	302.431	212.81	732.525	216.917	-297.598	704.275	617.468	-271.104	734.293	387.884	-206.647	749.45	396.141	-220.453	759.14	318.338	-199.532	731.782	227.373
339	3.38	4.00205	1131.08	465.024	67.0913	1133.14	505.26	-66.0073	1126.79	502.413	167.388	964.176	582.571	-158.485	971.262	578.98	-0.21398	947.221	544.908	274.301	665.575	603.649	278.849	729.425	376.564	217.635	741.656	388.566	232.206	756.489	302.437	212.766	732.506	216.932	-297.617	704.29	617.482	-271.146	734.294	387.898	-206.552	749.333	395.954	-220.694	758.461	317.933	-199.557	731.774	227.411
340	3.39	3.97573	1131.11	465.014	67.0953	1133.13	505.291	-66.026	1126.8	502.451	167.39	964.186	582.588	-158.486	971.284	578.988	-0.26186	947.269	544.896	274.323	665.557	603.652	278.842	729.424	376.599	217.631	741.668	388.583	232.167	756.544	302.425	212.751	732.498	216.949	-297.627	704.311	617.542	-271.168	734.315	387.942	-206.638	749.391	396.045	-220.655	758.687	318.104	-199.59	731.787	227.451
341	3.4	3.99732	1131.15	464.897	67.1428	1133.13	505.264	-65.9874	1126.82	502.389	167.416	964.206	582.578	-158.457	971.301	578.935	-0.26412	947.365	544.698	274.377	665.55	603.694	278.871	729.426	376.61	217.674	741.677	388.591	232.145	756.577	302.407	212.776	732.493	216.933	-297.573	704.323	617.536	-271.146	734.334	387.919	-206.789	749.568	396.273	-220.373	759.534	318.618	-199.566	731.82	227.396
342	3.41	4.01704	1131.18	464.771	67.2056	1133.11	505.216	-65.9516	1126.82	502.337	167.44	964.215	582.539	-158.421	971.311	578.896	-0.2392	947.43	544.586	274.414	665.529	603.701	278.901	729.421	376.628	217.72	741.671	388.615	232.136	756.577	302.389	212.822	732.484	216.933	-297.516	704.323	617.508	-271.124	734.352	387.877	-206.786	749.644	396.298	-220.271	759.762	318.728	-199.547	731.832	227.374
343	3.42	4.00553	1131.16	464.76	67.2011	1133.1	505.219	-65.9586	1126.81	502.382	167.448	964.221	582.541	-158.409	971.329	578.893	-0.25254	947.484	544.556	274.44	665.508	603.696	278.901	729.428	376.647	217.745	741.679	388.668	232.129	756.58	302.394	212.842	732.489	216.969	-297.513	704.341	617.52	-271.14	734.384	387.9	-206.745	749.61	396.215	-220.38	759.438	318.518	-199.564	731.843	227.403
344	3.43	3.96319	1131.18	464.666	67.1585	1133.09	505.173	-65.9749	1126.82	502.348	167.441	964.234	582.526	-158.413	971.351	578.907	-0.26269	947.506	544.484	274.448	665.519	603.706	278.889	729.448	376.641	217.73	741.696	388.66	232.123	756.594	302.402	212.805	732.505	216.946	-297.529	704.369	617.514	-271.161	734.409	387.922	-206.665	749.542	396.049	-220.548	758.98	318.222	-199.576	731.854	227.426
345	3.44	3.94471	1131.14	464.62	67.1397	1133.08	505.111	-65.9917	1126.79	502.319	167.422	964.223	582.506	-158.44	971.364	578.886	-0.25529	947.484	544.488	274.432	665.564	603.719	278.855	729.449	376.557	217.688	741.693	388.603	232.131	756.569	302.402	212.755	732.517	216.888	-297.557	704.378	617.488	-271.166	734.381	387.898	-206.804	749.633	396.229	-220.351	759.632	318.642	-199.584	731.839	227.408
346	3.45	3.96535	1131	464.776	67.1339	1133.03	505.102	-65.9884	1126.71	502.336	167.416	964.206	582.498	-158.458	971.35	578.885	-0.22739	947.396	544.66	274.389	665.582	603.68	278.834	729.423	376.532	217.663	741.667	388.586	232.176	756.517	302.449	212.749	732.507	216.904	-297.63	704.424	617.524	-271.156	734.323	387.912	-206.755	749.549	396.19	-220.435	759.383	318.482	-199.579	731.8	227.428
347	3.46	4.01715	1130.89	464.952	67.1446	1132.98	505.096	-65.9664	1126.66	502.333	167.432	964.201	582.489	-158.45	971.339	578.916	-0.17631	947.315	544.79	274.369	665.633	603.692	278.838	729.421	376.554	217.675	741.65	388.602	232.236	756.448	302.498	212.776	732.504	216.952	-297.675	704.473	617.532	-271.139	734.282	387.941	-206.587	749.371	396.032	-220.697	758.532	317.999	-199.554	731.754	227.458
348	3.47	4.04349	1130.87	464.869	67.151	1132.97	505.049	-65.9342	1126.65	502.273	167.448	964.214	582.445	-158.435	971.345	578.888	-0.14408	947.327	544.701	274.367	665.677	603.699	278.854	729.442	376.545	217.691	741.646	388.574	232.252	756.434	302.463	212.791	732.513	216.935	-297.677	704.509	617.518	-271.119	734.287	387.92	-206.513	749.349	395.934	-220.735	758.332	317.843	-199.531	731.743	227.425
349	3.48	4.04657	1130.89	464.686	67.166	1132.96	504.998	-65.9333	1126.65	502.211	167.458	964.233	582.421	-158.433	971.372	578.836	-0.13736	947.39	544.632	274.384	665.687	603.692	278.864	729.443	376.537	217.715	741.667	388.561	232.257	756.477	302.413	212.795	732.515	216.919	-297.685	704.52	617.514	-271.121	734.312	387.881	-206.5	749.358	395.858	-220.73	758.302	317.75	-199.532	731.762	227.401
350	3.49	4.04242	1130.9	464.651	67.1811	1132.95	504.998	-65.9487	1126.63	502.219	167.474	964.232	582.423	-158.431	971.393	578.833	-0.13256	947.428	544.654	274.406	665.651	603.71	278.889	729.427	376.575	217.751	741.676	388.614	232.252	756.518	302.437	212.808	732.499	216.965	-297.685	704.497	617.517	-271.145	734.328	387.873	-206.504	749.369	395.875	-220.74	758.281	317.776	-199.54	731.778	227.4
351	3.5	4.02503	1130.93	464.571	67.19	1132.93	504.983	-65.9497	1126.64	502.196	167.483	964.239	582.428	-158.421	971.417	578.821	-0.1749	947.486	544.565	274.449	665.655	603.777	278.917	729.426	376.598	217.763	741.691	388.636	232.21	756.574	302.453	212.829	732.478	216.997	-297.659	704.465	617.492	-271.161	734.343	387.881	-206.597	749.437	396.028	-220.617	758.661	318.038	-199.552	731.798	227.397
352	3.51	3.96001	1130.97	464.418	67.17	1132.92	504.896	-65.9641	1126.66	502.149	167.458	964.254	582.398	-158.434	971.458	578.805	-0.21841	947.545	544.43	274.479	665.666	603.802	278.899	729.433	376.569	217.731	741.702	388.601	232.138	756.618	302.437	212.805	732.502	216.938	-297.626	704.451	617.448	-271.177	734.378	387.844	-206.716	749.549	396.124	-220.469	759.146	318.349	-199.571	731.832	227.407
353	3.52	3.90974	1130.97	464.361	67.1566	1132.91	504.858	-65.9893	1126.66	502.136	167.444	964.269	582.371	-158.455	971.494	578.8	-0.24615	947.549	544.415	274.494	665.661	603.8	278.865	729.433	376.581	217.708	741.699	388.592	232.102	756.626	302.419	212.759	732.509	216.913	-297.633	704.484	617.461	-271.192	734.413	387.859	-206.605	749.458	395.947	-220.704	758.491	317.958	-199.602	731.853	227.392
354	3.53	3.92132	1130.91	464.38	67.1512	1132.92	504.862	-65.9913	1126.64	502.117	167.452	964.273	582.366	-158.46	971.487	578.809	-0.24653	947.535	544.405	274.501	665.709	603.818	278.87	729.448	376.594	217.71	741.693	388.595	232.134	756.613	302.425	212.76	732.507	216.939	-297.673	704.537	617.528	-271.189	734.409	387.862	-206.576	749.415	395.939	-220.753	758.34	317.845	-199.591	731.84	227.408
355	3.54	3.95205	1130.87	464.332	67.1285	1132.91	504.792	-65.9601	1126.61	502.045	167.456	964.269	582.335	-158.469	971.481	578.816	-0.21048	947.528	544.35	274.464	665.753	603.804	278.871	729.465	376.576	217.704	741.69	388.566	232.166	756.556	302.403	212.765	732.51	216.926	-297.705	704.593	617.542	-271.158	734.378	387.838	-206.609	749.474	395.966	-220.625	758.695	318.017	-199.561	731.818	227.389
356	3.55	3.96367	1130.84	464.333	67.1115	1132.89	504.743	-65.9608	1126.59	502.052	167.452	964.274	582.29	-158.484	971.48	578.803	-0.17899	947.523	544.367	274.448	665.752	603.796	278.852	729.464	376.541	217.69	741.694	388.561	232.191	756.513	302.455	212.751	732.535	216.888	-297.734	704.639	617.56	-271.14	734.346	387.85	-206.766	749.625	396.215	-220.349	759.564	318.566	-199.546	731.812	227.364
357	3.56	3.93843	1130.8	464.382	67.0878	1132.87	504.733	-65.9883	1126.57	502.067	167.437	964.281	582.283	-158.505	971.479	578.816	-0.1793	947.478	544.471	274.445	665.749	603.787	278.834	729.462	376.524	217.677	741.692	388.569	232.188	756.5	302.444	212.752	732.552	216.908	-297.766	704.65	617.596	-271.149	734.33	387.898	-206.837	749.634	396.356	-220.299	759.781	318.756	-199.555	731.796	227.417
358	3.57	3.92094	1130.74	464.343	67.0879	1132.82	504.691	-65.9878	1126.52	502.021	167.44	964.266	582.268	-158.5	971.471	578.799	-0.19637	947.441	544.45	274.46	665.75	603.774	278.846	729.44	376.534	217.689	741.672	388.548	232.195	756.46	302.436	212.756	732.525	216.89	-297.774	704.645	617.568	-271.15	734.313	387.898	-206.779	749.536	396.262	-220.403	759.418	318.539	-199.552	731.765	227.41
359	3.58	3.90945	1130.68	464.325	67.096	1132.8	504.679	-65.9903	1126.48	502.004	167.455	964.244	582.244	-158.478	971.451	578.755	-0.20569	947.413	544.476	274.496	665.765	603.793	278.867	729.422	376.541	217.717	741.647	388.56	232.193	756.451	302.424	212.777	732.478	216.909	-297.757	704.62	617.48	-271.146	734.297	387.882	-206.625	749.371	395.992	-220.676	758.521	317.959	-199.547	731.748	227.379
360	3.59	3.87102	1130.66	464.366	67.0897	1132.78	504.691	-66.0145	1126.47	502.008	167.439	964.245	582.232	-158.483	971.453	578.751	-0.24154	947.408	544.498	274.529	665.755	603.815	278.869	729.393	376.579	217.723	741.633	388.582	232.181	756.493	302.464	212.793	732.453	216.977	-297.751	704.571	617.424	-271.171	734.288	387.9	-206.624	749.323	395.954	-220.774	758.3	317.837	-199.563	731.745	227.411
361	3.6	3.80266	1130.7	464.33	67.0695	1132.78	504.646	-66.0517	1126.47	502.037	167.419	964.25	582.217	-158.502	971.484	578.749	-0.29105	947.466	544.435	274.537	665.719	603.797	278.861	729.398	376.616	217.717	741.637	388.608	232.154	756.536	302.474	212.773	732.455	216.967	-297.755	704.55	617.399	-271.216	734.318	387.91	-206.638	749.335	395.965	-220.805	758.261	317.824	-199.593	731.786	227.443
362	3.61	3.79772	1130.74	464.164	67.0637	1132.8	504.589	-66.051	1126.47	502.006	167.429	964.266	582.174	-158.487	971.506	578.71	-0.27197	947.542	544.306	274.549	665.727	603.799	278.866	729.418	376.551	217.74	741.659	388.597	232.143	756.572	302.426	212.773	732.469	216.903	-297.742	704.571	617.422	-271.19	734.354	387.855	-206.595	749.373	395.885	-220.783	758.261	317.768	-199.579	731.811	227.404
363	3.62	3.81964	1130.78	464.055	67.0599	1132.82	504.57	-66.046	1126.5	501.952	167.449	964.305	582.153	-158.481	971.535	578.673	-0.24002	947.637	544.156	274.553	665.77	603.838	278.877	729.45	376.531	217.754	741.685	388.575	232.144	756.604	302.397	212.781	732.495	216.867	-297.746	704.632	617.465	-271.169	734.403	387.816	-206.543	749.42	395.82	-220.737	758.284	317.699	-199.554	731.833	227.356
364	3.63	3.80552	1130.8	464.002	67.0195	1132.85	504.548	-66.0655	1126.53	501.963	167.447	964.336	582.139	-158.502	971.572	578.685	-0.24299	947.707	544.076	274.515	665.804	603.812	278.866	729.496	376.541	217.738	741.72	388.59	232.142	756.631	302.38	212.746	732.541	216.84	-297.786	704.698	617.526	-271.172	734.432	387.817	-206.545	749.451	395.822	-220.732	758.32	317.733	-199.561	731.864	227.343
365	3.64	3.78665	1130.79	464.006	66.9927	1132.87	504.537	-66.0764	1126.53	501.978	167.429	964.353	582.123	-158.513	971.592	578.723	-0.23282	947.724	544.048	274.483	665.829	603.76	278.851	729.528	376.488	217.713	741.737	388.585	232.142	756.634	302.354	212.722	732.571	216.812	-297.812	704.746	617.528	-271.176	734.42	387.816	-206.632	749.515	395.95	-220.622	758.721	318.023	-199.567	731.867	227.367
366	3.65	3.79351	1130.74	464.049	66.9874	1132.85	504.514	-66.0684	1126.48	501.945	167.439	964.35	582.113	-158.512	971.575	578.715	-0.20798	947.661	544.089	274.479	665.887	603.787	278.842	729.513	376.482	217.703	741.727	388.563	232.163	756.59	302.376	212.74	732.556	216.843	-297.836	704.751	617.497	-271.164	734.389	387.809	-206.716	749.571	396.114	-220.455	759.194	318.34	-199.552	731.83	227.368
367	3.66	3.81157	1130.66	464.174	66.9989	1132.81	504.566	-66.0776	1126.42	501.961	167.46	964.325	582.128	-158.501	971.542	578.718	-0.1813	947.558	544.249	274.497	665.917	603.819	278.854	729.477	376.541	217.705	741.701	388.566	232.215	756.536	302.488	212.753	732.527	216.902	-297.867	704.739	617.492	-271.163	734.363	387.848	-206.598	749.427	395.938	-220.684	758.51	317.928	-199.538	731.796	227.383
368	3.67	3.78764	1130.6	464.322	67.0055	1132.78	504.615	-66.1073	1126.39	502.005	167.471	964.315	582.158	-158.499	971.521	578.756	-0.18876	947.475	544.412	274.537	665.919	603.864	278.863	729.43	376.595	217.724	741.669	388.595	232.202	756.5	302.489	212.768	732.494	216.949	-297.881	704.708	617.48	-271.184	734.331	387.908	-206.592	749.364	395.925	-220.768	758.324	317.851	-199.543	731.771	227.419
369	3.68	3.75484	1130.6	464.316	67.0039	1132.77	504.615	-66.1064	1126.38	501.99	167.471	964.313	582.146	-158.497	971.511	578.733	-0.20856	947.479	544.425	274.578	665.903	603.88	278.883	729.417	376.622	217.737	741.662	388.574	232.206	756.486	302.462	212.79	732.471	216.979	-297.871	704.698	617.49	-271.167	734.313	387.877	-206.582	749.358	395.887	-220.779	758.286	317.817	-199.533	731.764	227.404
370	3.69	3.74422	1130.63	464.226	67.0066	1132.76	504.579	-66.0991	1126.38	501.962	167.476	964.313	582.108	-158.491	971.512	578.688	-0.18892	947.522	544.359	274.627	665.903	603.894	278.904	729.427	376.579	217.773	741.668	388.569	232.182	756.486	302.419	212.812	732.472	216.957	-297.841	704.695	617.468	-271.164	734.33	387.838	-206.559	749.377	395.818	-220.768	758.27	317.785	-199.531	731.769	227.361
371	3.7	3.71502	1130.68	464.2	66.9914	1132.76	504.569	-66.1148	1126.39	501.987	167.48	964.334	582.111	-158.5	971.534	578.669	-0.19908	947.564	544.276	274.653	665.904	603.9	278.9	729.434	376.577	217.778	741.68	388.589	232.158	756.51	302.371	212.815	732.479	216.938	-297.837	704.69	617.462	-271.18	734.35	387.855	-206.569	749.387	395.804	-220.775	758.267	317.766	-199.542	731.774	227.386
372	3.71	3.6664	1130.72	464.117	66.9586	1132.79	504.544	-66.147	1126.4	502.028	167.462	964.36	582.116	-158.525	971.564	578.692	-0.24936	947.628	544.202	274.654	665.898	603.913	278.871	729.432	376.563	217.773	741.696	388.625	232.136	756.553	302.344	212.781	732.484	216.906	-297.845	704.695	617.46	-271.207	734.376	387.857	-206.597	749.412	395.845	-220.789	758.278	317.788	-199.555	731.798	227.401
373	3.72	3.64339	1130.78	464.02	66.9203	1132.8	504.507	-66.1503	1126.41	502	167.443	964.38	582.09	-158.539	971.586	578.678	-0.26679	947.682	544.133	274.627	665.914	603.868	278.846	729.461	376.519	217.748	741.707	388.59	232.099	756.583	302.346	212.738	732.502	216.868	-297.847	704.704	617.436	-271.223	734.406	387.833	-206.687	749.493	395.928	-220.662	758.667	318.023	-199.567	731.823	227.375
374	3.73	3.65117	1130.75	464.042	66.8922	1132.8	504.477	-66.1346	1126.4	501.963	167.432	964.381	582.067	-158.55	971.596	578.671	-0.28024	947.681	544.1	274.611	665.949	603.85	278.832	729.467	376.487	217.713	741.707	388.557	232.095	756.58	302.355	212.713	732.51	216.844	-297.875	704.736	617.439	-271.218	734.401	387.799	-206.764	749.57	396.066	-220.498	759.148	318.322	-199.568	731.827	227.347
375	3.74	3.67243	1130.7	464.126	66.8852	1132.79	504.476	-66.1232	1126.39	501.962	167.438	964.392	582.064	-158.557	971.6	578.688	-0.28514	947.669	544.113	274.598	665.996	603.854	278.84	729.461	376.492	217.71	741.703	388.562	232.119	756.572	302.392	212.706	732.507	216.824	-297.895	704.755	617.423	-271.195	734.4	387.796	-206.645	749.455	395.91	-220.701	758.493	317.901	-199.563	731.823	227.324
376	3.75	3.69419	1130.69	464.142	66.8931	1132.78	504.458	-66.1116	1126.38	501.952	167.447	964.408	582.084	-158.566	971.608	578.7	-0.27015	947.666	544.147	274.582	666.007	603.838	278.823	729.481	376.487	217.717	741.718	388.558	232.143	756.567	302.387	212.709	732.531	216.819	-297.904	704.784	617.433	-271.198	734.39	387.791	-206.593	749.431	395.863	-220.743	758.34	317.772	-199.562	731.834	227.341
377	3.76	3.70665	1130.72	464.066	66.9156	1132.77	504.471	-66.102	1126.38	501.907	167.44	964.402	582.06	-158.562	971.609	578.703	-0.25486	947.696	544.12	274.568	665.997	603.813	278.841	729.496	376.504	217.728	741.724	388.533	232.156	756.566	302.376	212.721	732.539	216.817	-297.905	704.792	617.435	-271.197	734.408	387.795	-206.574	749.437	395.807	-220.749	758.318	317.718	-199.551	731.822	227.336
378	3.77	3.74523	1130.71	464.078	66.9448	1132.74	504.525	-66.1068	1126.38	501.924	167.457	964.394	582.044	-158.546	971.597	578.703	-0.23548	947.66	544.182	274.59	665.999	603.83	278.887	729.471	376.536	217.748	741.712	388.523	232.177	756.554	302.383	212.752	732.512	216.854	-297.912	704.771	617.452	-271.172	734.387	387.8	-206.658	749.472	395.911	-220.619	758.69	317.965	-199.536	731.805	227.339
379	3.78	3.78654	1130.67	464.149	67.0069	1132.71	504.581	-66.1031	1126.37	501.934	167.482	964.389	582.051	-158.517	971.567	578.692	-0.19958	947.619	544.214	274.632	665.99	603.883	278.92	729.439	376.574	217.79	741.689	388.545	232.188	756.54	302.361	212.797	732.482	216.913	-297.9	704.75	617.456	-271.153	734.363	387.808	-206.748	749.527	396.079	-220.454	759.171	318.306	-199.528	731.79	227.343
380	3.79	3.79713	1130.65	464.165	67.0448	1132.69	504.587	-66.0803	1126.36	501.888	167.491	964.391	582.039	-158.498	971.562	578.689	-0.19565	947.61	544.186	274.676	665.99	603.922	278.937	729.419	376.58	217.824	741.673	388.565	232.192	756.509	302.371	212.823	732.466	216.948	-297.878	704.727	617.418	-271.149	734.367	387.796	-206.595	749.424	395.883	-220.666	758.509	317.867	-199.517	731.782	227.339
381	3.8	3.75472	1130.63	464.188	67.0235	1132.7	504.576	-66.0928	1126.33	501.924	167.484	964.398	582.053	-158.504	971.575	578.703	-0.23777	947.609	544.202	274.704	666.009	603.938	278.931	729.422	376.594	217.8	741.672	388.544	232.182	756.517	302.378	212.807	732.463	216.946	-297.869	704.721	617.416	-271.165	734.359	387.802	-206.588	749.396	395.87	-220.744	758.327	317.811	-199.526	731.779	227.358
382	3.81	3.7151	1130.62	464.223	66.9987	1132.71	504.608	-66.1039	1126.33	501.97	167.474	964.397	582.061	-158.534	971.588	578.72	-0.26277	947.6	544.235	274.713	666.046	603.943	278.902	729.433	376.578	217.777	741.679	388.557	232.17	756.523	302.39	212.778	732.466	216.932	-297.891	704.721	617.417	-271.18	734.35	387.824	-206.684	749.439	396.002	-220.657	758.658	318.074	-199.537	731.774	227.401
383	3.82	3.72727	1130.62	464.236	66.9818	1132.74	504.584	-66.0987	1126.33	501.956	167.466	964.409	582.046	-158.555	971.606	578.711	-0.26922	947.609	544.197	274.705	666.09	603.959	278.876	729.442	376.534	217.757	741.687	388.558	232.14	756.535	302.361	212.748	732.475	216.882	-297.916	704.748	617.419	-271.181	734.366	387.83	-206.768	749.514	396.112	-220.506	759.123	318.343	-199.526	731.771	227.376
384	3.83	3.72128	1130.71	464.102	66.9282	1132.77	504.502	-66.1071	1126.37	501.941	167.454	964.441	582.001	-158.582	971.649	578.688	-0.27483	947.71	544.027	274.664	666.126	603.944	278.843	729.471	376.476	217.726	741.721	388.527	232.115	756.587	302.354	212.707	732.509	216.811	-297.953	704.798	617.391	-271.191	734.406	387.812	-206.638	749.452	395.872	-220.687	758.481	317.871	-199.52	731.804	227.33
385	3.84	3.68401	1130.79	464.03	66.8848	1132.82	504.47	-66.1251	1126.43	501.956	167.429	964.487	581.99	-158.618	971.693	578.681	-0.30568	947.796	543.939	274.635	666.123	603.899	278.81	729.516	376.458	217.698	741.749	388.51	232.112	756.642	302.369	212.67	732.556	216.796	-297.989	704.847	617.42	-271.21	734.432	387.803	-206.612	749.474	395.828	-220.755	758.34	317.792	-199.55	731.846	227.323
386	3.85	3.67802	1130.79	463.994	66.8906	1132.83	504.436	-66.1235	1126.43	501.95	167.439	964.512	581.991	-158.615	971.696	578.658	-0.30037	947.762	543.941	274.631	666.15	603.9	278.813	729.519	376.435	217.719	741.751	388.513	232.124	756.636	302.358	212.671	732.555	216.792	-297.993	704.887	617.431	-271.207	734.439	387.8	-206.591	749.463	395.788	-220.759	758.319	317.736	-199.555	731.854	227.347
387	3.86	3.71514	1130.74	463.983	66.9247	1132.78	504.441	-66.1098	1126.4	501.911	167.48	964.5	581.977	-158.582	971.672	578.62	-0.23862	947.686	543.97	274.65	666.168	603.928	278.867	729.491	376.456	217.75	741.727	388.516	232.141	756.57	302.349	212.725	732.53	216.817	-297.969	704.887	617.409	-271.172	734.431	387.774	-206.614	749.518	395.855	-220.604	758.696	317.934	-199.515	731.833	227.329
388	3.87	3.752	1130.68	464.094	66.9679	1132.74	504.511	-66.1135	1126.38	501.922	167.504	964.472	581.976	-158.56	971.645	578.628	-0.2167	947.606	544.102	274.694	666.131	603.921	278.926	729.456	376.545	217.782	741.689	388.56	232.166	756.513	302.363	212.776	732.494	216.894	-297.963	704.861	617.391	-271.163	734.41	387.817	-206.715	749.581	396.05	-220.458	759.174	318.278	-199.506	731.809	227.352
389	3.88	3.73272	1130.66	464.175	66.9753	1132.74	504.555	-66.1301	1126.35	501.931	167.501	964.454	581.967	-158.551	971.622	578.672	-0.23486	947.578	544.146	274.732	666.087	603.896	278.945	729.432	376.618	217.79	741.672	388.556	232.18	756.481	302.408	212.796	732.469	216.948	-297.975	704.822	617.376	-271.186	734.379	387.835	-206.638	749.439	395.92	-220.679	758.523	317.862	-199.521	731.801	227.392
390	3.89	3.72861	1130.65	464.168	66.9814	1132.72	504.539	-66.1413	1126.34	501.922	167.505	964.461	581.945	-158.535	971.62	578.677	-0.23983	947.601	544.095	274.754	666.078	603.895	278.948	729.413	376.605	217.804	741.669	388.552	232.175	756.476	302.373	212.809	732.437	216.959	-297.979	704.807	617.345	-271.192	734.373	387.817	-206.614	749.405	395.837	-220.723	758.358	317.763	-199.516	731.782	227.359
391	3.9	3.72014	1130.63	464.129	66.9767	1132.72	504.507	-66.142	1126.32	501.906	167.514	964.471	581.926	-158.522	971.621	578.62	-0.20988	947.64	544.045	274.755	666.103	603.922	278.945	729.418	376.571	217.818	741.684	388.541	232.179	756.472	302.346	212.81	732.426	216.939	-297.967	704.822	617.34	-271.173	734.374	387.782	-206.647	749.453	395.916	-220.604	758.695	317.975	-199.511	731.774	227.349
392	3.91	3.68679	1130.63	464.136	66.9316	1132.75	504.49	-66.1769	1126.31	501.947	167.5	964.497	581.929	-158.546	971.65	578.632	-0.22085	947.666	544.052	274.746	666.155	603.944	278.925	729.448	376.561	217.807	741.706	388.552	232.178	756.517	302.343	212.779	732.454	216.907	-297.992	704.856	617.363	-271.191	734.392	387.803	-206.765	749.541	396.075	-220.47	759.172	318.307	-199.527	731.783	227.361
393	3.92	3.63486	1130.66	464.075	66.8496	1132.79	504.453	-66.2072	1126.32	501.976	167.447	964.528	581.907	-158.583	971.68	578.629	-0.26582	947.72	543.986	274.728	666.213	603.97	278.885	729.481	376.516	217.787	741.734	388.572	232.145	756.562	302.324	212.722	732.51	216.843	-298.037	704.894	617.357	-271.206	734.419	387.823	-206.631	749.464	395.863	-220.682	758.531	317.895	-199.545	731.815	227.339
394	3.93	3.59707	1130.69	463.982	66.7962	1132.81	504.376	-66.218	1126.32	501.967	167.437	964.547	581.875	-158.593	971.702	578.632	-0.27662	947.762	543.878	274.716	666.24	603.989	278.843	729.5	376.433	217.757	741.746	388.539	232.122	756.583	302.322	212.688	732.536	216.76	-298.035	704.909	617.342	-271.188	734.445	387.778	-206.593	749.458	395.781	-220.716	758.369	317.76	-199.539	731.827	227.315
395	3.94	3.58289	1130.67	464.046	66.7828	1132.83	504.39	-66.2233	1126.31	501.975	167.44	964.559	581.902	-158.585	971.684	578.662	-0.27515	947.719	543.941	274.71	666.246	603.981	278.842	729.502	376.448	217.735	741.747	388.513	232.123	756.586	302.338	212.682	732.529	216.782	-298.042	704.916	617.362	-271.184	734.441	387.787	-206.668	749.514	395.926	-220.601	758.721	317.979	-199.53	731.831	227.335
396	3.95	3.56476	1130.66	464.126	66.7963	1132.83	504.455	-66.2347	1126.32	502.004	167.455	964.551	581.955	-158.586	971.671	578.684	-0.27671	947.696	543.983	274.728	666.242	603.968	278.855	729.487	376.503	217.74	741.744	388.531	232.126	756.576	302.344	212.689	732.512	216.822	-298.025	704.915	617.395	-271.191	734.423	387.839	-206.845	749.65	396.214	-220.353	759.575	318.574	-199.527	731.824	227.381
397	3.96	3.56099	1130.68	464.059	66.8195	1132.83	504.48	-66.2293	1126.33	501.974	167.466	964.543	581.941	-158.568	971.667	578.694	-0.25629	947.719	543.909	274.753	666.261	603.991	278.882	729.482	376.511	217.783	741.75	388.55	232.097	756.568	302.281	212.719	732.51	216.836	-297.996	704.894	617.388	-271.189	734.427	387.825	-206.781	749.637	396.137	-220.386	759.409	318.446	-199.526	731.83	227.34
398	3.97	3.57278	1130.71	464.038	66.8366	1132.82	504.477	-66.2359	1126.33	501.966	167.49	964.543	581.943	-158.543	971.648	578.658	-0.24724	947.719	543.864	274.771	666.251	603.999	278.914	729.474	376.51	217.807	741.743	388.514	232.107	756.564	302.26	212.754	732.509	216.841	-297.965	704.855	617.38	-271.174	734.421	387.778	-206.611	749.488	395.833	-220.622	758.59	317.869	-199.513	731.826	227.317
399	3.98	3.56869	1130.67	464.092	66.8406	1132.8	504.496	-66.2578	1126.31	501.995	167.511	964.528	581.946	-158.537	971.626	578.665	-0.2606	947.679	543.93	274.771	666.235	604.016	278.939	729.455	376.559	217.817	741.723	388.511	232.142	756.549	302.287	212.777	732.48	216.897	-297.958	704.821	617.412	-271.164	734.391	387.774	-206.576	749.42	395.789	-220.698	758.361	317.742	-199.513	731.81	227.322
400	3.99	3.55105	1130.66	464.149	66.8307	1132.8	504.516	-66.2738	1126.3	502.021	167.501	964.51	581.954	-158.54	971.607	578.691	-0.24421	947.658	543.97	274.775	666.258	604.037	278.936	729.448	376.576	217.803	741.718	388.513	232.146	756.523	302.321	212.778	732.467	216.941	-297.965	704.801	617.401	-271.17	734.384	387.804	-206.565	749.39	395.851	-220.724	758.306	317.757	-199.518	731.796	227.343
401	4	3.52979	1130.67	464.177	66.8105	1132.81	504.557	-66.2903	1126.32	502.011	167.483	964.514	581.952	-158.552	971.616	578.704	-0.24994	947.632	543.99	274.752	666.287	604.039	278.922	729.461	376.562	217.798	741.728	388.543	232.134	756.513	302.351	212.765	732.475	216.924	-297.978	704.788	617.367	-271.181	734.376	387.822	-206.579	749.397	395.89	-220.74	758.294	317.76	-199.534	731.789	227.358
402	4.01	3.51198	1130.66	464.231	66.7723	1132.84	504.558	-66.3139	1126.33	502.033	167.456	964.549	581.949	-158.583	971.626	578.742	-0.27429	947.598	544.018	274.71	666.312	603.999	278.893	729.474	376.517	217.776	741.727	388.552	232.125	756.524	302.345	212.738	732.493	216.894	-298.014	704.786	617.349	-271.197	734.385	387.817	-206.598	749.396	395.889	-220.754	758.28	317.771	-199.551	731.787	227.378
403	4.02	3.49865	1130.68	464.226	66.731	1132.86	504.526	-66.322	1126.32	502.077	167.446	964.57	581.942	-158.594	971.649	578.756	-0.27417	947.585	544.046	274.688	666.336	603.966	278.861	729.487	376.458	217.746	741.729	388.511	232.157	756.537	302.363	212.722	732.506	216.857	-298.034	704.82	617.392	-271.194	734.389	387.809	-206.678	749.453	395.99	-220.618	758.664	318.011	-199.538	731.785	227.392
404	4.03	3.50559	1130.74	464.168	66.7284	1132.9	504.506	-66.3155	1126.34	502.069	167.449	964.593	581.944	-158.591	971.67	578.738	-0.26701	947.63	543.947	274.686	666.337	603.939	278.861	729.504	376.442	217.753	741.746	388.498	232.163	756.555	302.357	212.705	732.53	216.795	-298.029	704.843	617.419	-271.18	734.401	387.787	-206.74	749.556	396.116	-220.451	759.166	318.298	-199.52	731.809	227.348
405	4.04	3.47658	1130.79	464.13	66.7134	1132.93	504.504	-66.3263	1126.37	502.094	167.453	964.61	581.966	-158.601	971.679	578.74	-0.29793	947.705	543.878	274.699	666.322	603.949	278.857	729.519	376.428	217.746	741.764	388.475	232.154	756.597	302.327	212.695	732.542	216.786	-298	704.85	617.429	-271.195	734.43	387.779	-206.661	749.554	395.981	-220.549	758.933	318.117	-199.529	731.84	227.317
406	4.05	3.45086	1130.81	464.162	66.7155	1132.94	504.543	-66.354	1126.39	502.14	167.454	964.615	582.019	-158.611	971.671	578.772	-0.31365	947.74	543.865	274.728	666.305	603.963	278.869	729.51	376.461	217.763	741.762	388.515	232.139	756.619	302.331	212.711	732.533	216.82	-297.981	704.825	617.446	-271.203	734.442	387.805	-206.745	749.621	396.083	-220.464	759.266	318.368	-199.552	731.851	227.334
407	4.06	3.46736	1130.81	464.167	66.7429	1132.92	504.575	-66.3439	1126.4	502.098	167.483	964.603	582.016	-158.58	971.647	578.765	-0.29497	947.698	543.924	274.776	666.283	603.974	278.906	729.481	376.487	217.811	741.728	388.559	232.122	756.576	302.352	212.749	732.495	216.857	-297.948	704.786	617.429	-271.162	734.425	387.798	-206.664	749.554	395.977	-220.537	758.945	318.15	-199.538	731.83	227.347
408	4.07	3.48023	1130.81	464.115	66.769	1132.91	504.6	-66.3241	1126.39	502.043	167.504	964.581	582.023	-158.56	971.617	578.724	-0.27159	947.674	543.885	274.816	666.275	604.007	278.95	729.455	376.537	217.833	741.711	388.561	232.143	756.531	302.379	212.791	732.465	216.906	-297.911	704.778	617.424	-271.141	734.404	387.764	-206.718	749.599	396.072	-220.433	759.233	318.335	-199.51	731.811	227.335
409	4.08	3.47055	1130.79	464.179	66.7754	1132.92	504.663	-66.3479	1126.39	502.109	167.486	964.568	582.042	-158.57	971.593	578.731	-0.2889	947.65	543.907	274.828	666.287	604.03	278.954	729.446	376.585	217.826	741.705	388.558	232.126	756.53	302.355	212.78	732.465	216.927	-297.917	704.744	617.396	-271.165	734.39	387.807	-206.621	749.471	395.919	-220.678	758.541	317.896	-199.531	731.806	227.371
410	4.09	3.45391	1130.81	464.258	66.7446	1132.93	504.655	-66.3657	1126.39	502.14	167.452	964.565	582.033	-158.593	971.586	578.747	-0.3198	947.592	544.007	274.811	666.3	604.028	278.937	729.452	376.61	217.81	741.7	388.569	232.137	756.496	302.367	212.756	732.474	216.933	-297.948	704.724	617.377	-271.188	734.379	387.842	-206.688	749.493	396.002	-220.642	758.754	318.053	-199.556	731.8	227.413
411	4.1	3.46902	1130.8	464.249	66.7285	1132.95	504.62	-66.3383	1126.4	502.082	167.455	964.563	582.008	-158.595	971.579	578.73	-0.31649	947.539	544	274.771	666.315	603.993	278.925	729.459	376.556	217.79	741.701	388.52	232.141	756.477	302.321	212.756	732.474	216.905	-297.961	704.742	617.389	-271.171	734.379	387.805	-206.829	749.611	396.234	-220.36	759.574	318.573	-199.531	731.787	227.374
412	4.11	3.49079	1130.8	464.247	66.7107	1132.96	504.597	-66.3248	1126.41	502.049	167.446	964.579	581.986	-158.605	971.567	578.733	-0.31866	947.526	543.957	274.733	666.335	603.975	278.904	729.468	376.516	217.773	741.707	388.509	232.156	756.498	302.353	212.742	732.492	216.867	-297.999	704.754	617.406	-271.162	734.371	387.759	-206.775	749.564	396.173	-220.388	759.385	318.437	-199.517	731.778	227.322
413	4.12	3.465	1130.79	464.336	66.6731	1132.98	504.608	-66.3672	1126.42	502.076	167.391	964.597	581.976	-158.629	971.552	578.751	-0.36245	947.525	543.943	274.696	666.35	603.963	278.866	729.487	376.503	217.741	741.709	388.509	232.148	756.528	302.377	212.711	732.512	216.851	-298.034	704.727	617.399	-271.185	734.368	387.813	-206.64	749.421	395.948	-220.66	758.559	317.92	-199.539	731.778	227.355
414	4.13	3.4407	1130.84	464.27	66.6347	1133.01	504.554	-66.3978	1126.43	502.086	167.357	964.597	581.957	-158.638	971.548	578.735	-0.39915	947.546	543.896	274.683	666.352	603.944	278.853	729.502	376.492	217.712	741.736	388.481	232.126	756.55	302.357	212.692	732.506	216.827	-298.033	704.7	617.386	-271.208	734.393	387.846	-206.621	749.396	395.871	-220.755	758.351	317.78	-199.563	731.793	227.365
415	4.14	3.43441	1130.89	464.186	66.6234	1133.01	504.526	-66.3876	1126.43	502.074	167.341	964.583	581.918	-158.63	971.53	578.688	-0.40829	947.537	543.813	274.698	666.358	603.993	278.847	729.499	376.438	217.716	741.74	388.469	232.094	756.58	302.305	212.686	732.499	216.817	-298.015	704.682	617.364	-271.199	734.41	387.802	-206.599	749.38	395.823	-220.753	758.279	317.751	-199.555	731.806	227.339
416	4.15	3.43017	1130.88	464.235	66.6451	1133	504.572	-66.3834	1126.45	502.071	167.341	964.581	581.945	-158.603	971.509	578.702	-0.40733	947.505	543.867	274.717	666.375	604.047	278.855	729.497	376.467	217.753	741.729	388.532	232.101	756.604	302.316	212.703	732.484	216.865	-297.996	704.644	617.383	-271.205	734.398	387.808	-206.596	749.39	395.841	-220.746	758.272	317.776	-199.546	731.804	227.343
417	4.16	3.41246	1130.91	464.206	66.6673	1133.01	504.63	-66.3952	1126.47	502.084	167.346	964.571	581.99	-158.585	971.492	578.712	-0.40291	947.505	543.903	274.741	666.372	604.072	278.891	729.505	376.541	217.772	741.74	388.56	232.1	756.62	302.345	212.74	732.48	216.891	-297.974	704.615	617.407	-271.205	734.404	387.837	-206.595	749.408	395.873	-220.743	758.285	317.79	-199.552	731.814	227.369
418	4.17	3.42017	1130.92	464.107	66.6557	1133.02	504.58	-66.3908	1126.46	502.019	167.346	964.548	581.96	-158.574	971.475	578.67	-0.39831	947.493	543.821	274.769	666.361	604.076	278.919	729.495	376.526	217.781	741.735	388.507	232.127	756.628	302.355	212.757	732.497	216.847	-297.942	704.582	617.398	-271.186	734.394	387.796	-206.585	749.419	395.819	-220.722	758.294	317.733	-199.551	731.82	227.355
419	4.18	3.44976	1130.88	464.115	66.6579	1133.01	504.56	-66.3962	1126.43	501.983	167.348	964.515	581.919	-158.559	971.433	578.634	-0.35371	947.427	543.84	274.77	666.353	604.067	278.935	729.483	376.503	217.8	741.722	388.5	232.148	756.574	302.3	212.771	732.497	216.838	-297.919	704.564	617.405	-271.167	734.372	387.792	-206.565	749.394	395.797	-220.717	758.288	317.694	-199.53	731.802	227.339
420	4.19	3.45389	1130.83	464.209	66.6521	1133.03	504.594	-66.4196	1126.42	502.008	167.359	964.502	581.948	-158.55	971.39	578.685	-0.33656	947.345	543.964	274.75	666.349	604.067	278.933	729.482	376.532	217.806	741.716	388.532	232.197	756.507	302.351	212.787	732.482	216.886	-297.94	704.547	617.439	-271.167	734.352	387.831	-206.648	749.429	395.976	-220.608	758.674	317.982	-199.524	731.782	227.375
421	4.2	3.42985	1130.8	464.252	66.616	1133.03	504.563	-66.4391	1126.39	501.999	167.336	964.493	581.965	-158.553	971.374	578.727	-0.35281	947.299	543.993	274.71	666.339	604.042	278.905	729.488	376.52	217.779	741.715	388.529	232.198	756.47	302.375	212.756	732.486	216.879	-297.966	704.528	617.425	-271.166	734.344	387.849	-206.818	749.549	396.223	-220.362	759.559	318.593	-199.534	731.778	227.403
422	4.21	3.41462	1130.8	464.211	66.5761	1133.02	504.487	-66.4471	1126.38	501.98	167.31	964.477	581.93	-158.561	971.357	578.721	-0.3743	947.289	543.923	274.681	666.304	603.995	278.886	729.488	376.483	217.754	741.712	388.513	232.186	756.463	302.369	212.729	732.486	216.825	-297.98	704.53	617.427	-271.154	734.335	387.824	-206.799	749.506	396.147	-220.426	759.389	318.456	-199.538	731.776	227.37
423	4.22	3.3829	1130.79	464.197	66.5487	1133.04	504.442	-66.4707	1126.38	501.975	167.291	964.47	581.941	-158.569	971.349	578.728	-0.39556	947.254	543.94	274.672	666.275	603.966	278.88	729.479	376.482	217.745	741.71	388.536	232.171	756.49	302.347	212.731	732.485	216.842	-297.989	704.525	617.439	-271.168	734.335	387.819	-206.641	749.406	395.946	-220.685	758.556	317.926	-199.549	731.785	227.353
424	4.23	3.33707	1130.81	464.189	66.5287	1133.03	504.434	-66.5007	1126.39	501.984	167.27	964.465	581.96	-158.573	971.343	578.756	-0.41714	947.258	543.933	274.659	666.255	603.954	278.866	729.464	376.488	217.741	741.699	388.562	232.145	756.544	302.329	212.703	732.503	216.828	-297.977	704.482	617.417	-271.194	734.352	387.832	-206.669	749.444	396.012	-220.632	758.733	318.054	-199.561	731.795	227.365
425	4.24	3.30186	1130.86	464.121	66.4932	1133.03	504.386	-66.5104	1126.4	501.959	167.251	964.462	581.938	-158.579	971.336	578.732	-0.44485	947.306	543.81	274.66	666.229	603.959	278.858	729.472	376.496	217.733	741.716	388.559	232.136	756.598	302.405	212.7	732.509	216.801	-297.952	704.427	617.367	-271.211	734.385	387.802	-206.781	749.531	396.07	-220.5	759.167	318.319	-199.576	731.816	227.328
426	4.25	3.28212	1130.91	464.049	66.4821	1133.03	504.371	-66.5391	1126.44	501.959	167.249	964.461	581.942	-158.572	971.333	578.726	-0.45324	947.309	543.789	274.675	666.157	603.936	278.864	729.489	376.514	217.742	741.735	388.555	232.111	756.601	302.402	212.707	732.498	216.824	-297.914	704.355	617.33	-271.234	734.411	387.796	-206.675	749.439	395.858	-220.701	758.511	317.857	-199.584	731.844	227.314
427	4.26	3.26727	1130.91	464.062	66.4784	1133.03	504.39	-66.5651	1126.45	501.981	167.263	964.439	581.971	-158.559	971.305	578.751	-0.4258	947.279	543.833	274.691	666.108	603.908	278.884	729.472	376.533	217.773	741.715	388.62	232.13	756.599	302.361	212.749	732.491	216.892	-297.904	704.318	617.368	-271.231	734.412	387.829	-206.646	749.397	395.902	-220.759	758.346	317.772	-199.577	731.849	227.342
428	4.27	3.27036	1130.88	464.124	66.4786	1133.03	504.368	-66.5558	1126.44	501.966	167.277	964.421	581.972	-158.536	971.262	578.768	-0.40868	947.216	543.872	274.693	666.078	603.894	278.918	729.444	376.56	217.8	741.689	388.632	232.15	756.546	302.315	212.789	732.472	216.914	-297.895	704.308	617.402	-271.202	734.377	387.835	-206.688	749.424	396.035	-220.633	758.681	318.037	-199.566	731.82	227.356
429	4.28	3.27958	1130.84	464.15	66.4734	1133.05	504.375	-66.5534	1126.41	501.97	167.265	964.397	581.987	-158.521	971.22	578.767	-0.39528	947.156	543.893	274.673	666.078	603.929	278.936	729.443	376.565	217.793	741.673	388.607	232.159	756.479	302.354	212.803	732.459	216.935	-297.888	704.306	617.436	-271.175	734.339	387.831	-206.821	749.542	396.257	-220.358	759.538	318.583	-199.547	731.792	227.381
430	4.29	3.27006	1130.82	464.214	66.4563	1133.07	504.403	-66.5661	1126.4	501.994	167.244	964.373	582.027	-158.532	971.185	578.805	-0.39867	947.095	543.917	274.651	666.082	603.945	278.922	729.444	376.567	217.769	741.669	388.6	232.199	756.446	302.408	212.798	732.479	216.955	-297.917	704.288	617.443	-271.174	734.319	387.874	-206.797	749.49	396.2	-220.443	759.395	318.473	-199.544	731.776	227.405
431	4.3	3.25178	1130.84	464.239	66.4294	1133.1	504.408	-66.5857	1126.38	502.026	167.23	964.367	582.041	-158.538	971.162	578.836	-0.40722	947.039	543.962	274.623	666.095	603.938	278.892	729.457	376.546	217.747	741.666	388.581	232.212	756.433	302.399	212.778	732.496	216.947	-297.939	704.284	617.473	-271.174	734.297	387.913	-206.726	749.42	396.133	-220.581	758.951	318.247	-199.558	731.773	227.431
432	4.31	3.24446	1130.82	464.195	66.4042	1133.11	504.345	-66.5795	1126.37	501.974	167.224	964.357	582.011	-158.531	971.139	578.826	-0.40348	946.984	543.969	274.594	666.112	603.93	278.874	729.466	376.49	217.729	741.664	388.529	232.201	756.435	302.391	212.751	732.489	216.9	-297.934	704.268	617.464	-271.169	734.285	387.888	-206.833	749.513	396.291	-220.354	759.591	318.656	-199.546	731.764	227.398
433	4.32	3.2287	1130.83	464.16	66.3912	1133.11	504.301	-66.5933	1126.38	501.961	167.202	964.349	582.013	-158.539	971.125	578.813	-0.41809	946.972	543.94	274.567	666.113	603.942	278.867	729.469	376.494	217.717	741.667	388.51	232.171	756.484	302.384	212.739	732.489	216.867	-297.941	704.245	617.429	-271.172	734.29	387.868	-206.856	749.561	396.274	-220.291	759.743	318.713	-199.552	731.782	227.373
434	4.33	3.18401	1130.88	464.147	66.3618	1133.13	504.317	-66.6378	1126.4	501.996	167.171	964.352	582.017	-158.55	971.12	578.843	-0.46652	946.986	543.948	274.56	666.08	603.925	278.858	729.471	376.518	217.705	741.686	388.527	232.174	756.538	302.411	212.729	732.503	216.909	-297.942	704.219	617.454	-271.19	734.312	387.867	-206.834	749.519	396.217	-220.416	759.412	318.507	-199.578	731.813	227.413
435	4.34	3.14692	1130.93	464.101	66.3371	1133.13	504.294	-66.6663	1126.42	501.986	167.151	964.351	582.013	-158.549	971.102	578.827	-0.49484	946.998	543.903	274.565	666.029	603.886	278.857	729.476	376.518	217.716	741.699	388.548	232.146	756.575	302.36	212.727	732.492	216.896	-297.919	704.163	617.439	-271.207	734.328	387.852	-206.768	749.455	396.09	-220.571	758.944	318.201	-199.597	731.825	227.401
436	4.35	3.15497	1130.96	464.004	66.3296	1133.12	504.262	-66.6649	1126.43	501.955	167.164	964.337	581.998	-158.519	971.074	578.794	-0.50152	946.998	543.816	274.589	665.99	603.862	278.866	729.468	376.516	217.742	741.697	388.547	232.123	756.592	302.313	212.749	732.478	216.845	-297.873	704.097	617.37	-271.201	734.347	387.81	-206.809	749.481	396.14	-220.474	759.211	318.376	-199.584	731.831	227.372
437	4.36	3.16306	1130.97	464.023	66.326	1133.13	504.313	-66.6758	1126.45	501.976	167.155	964.337	582.032	-158.502	971.055	578.807	-0.49709	946.995	543.824	274.606	665.987	603.889	278.895	729.451	376.556	217.759	741.694	388.601	232.142	756.614	302.355	212.764	732.472	216.879	-297.866	704.073	617.374	-271.214	734.358	387.839	-206.654	749.366	395.969	-220.699	758.501	317.935	-199.581	731.831	227.384
438	4.37	3.14333	1130.99	464.066	66.3167	1133.16	504.36	-66.7038	1126.48	501.986	167.138	964.332	582.074	-158.515	971.038	578.825	-0.51821	946.968	543.921	274.595	665.994	603.889	278.893	729.437	376.592	217.746	741.692	388.61	232.15	756.626	302.384	212.753	732.485	216.922	-297.883	704.06	617.424	-271.241	734.351	387.871	-206.645	749.344	395.935	-220.779	758.33	317.858	-199.599	731.823	227.437
439	4.38	3.13875	1130.99	464.066	66.3133	1133.18	504.345	-66.7031	1126.47	501.989	167.131	964.319	582.061	-158.515	971.014	578.8	-0.52081	946.92	543.918	274.581	666.011	603.883	278.881	729.452	376.558	217.724	741.694	388.537	232.15	756.58	302.345	212.744	732.49	216.882	-297.888	704.039	617.41	-271.228	734.334	387.862	-206.722	749.385	396.014	-220.68	758.661	318.077	-199.601	731.815	227.417
440	4.39	3.17573	1130.95	464.135	66.3186	1133.18	504.338	-66.6723	1126.44	501.968	167.14	964.316	582.087	-158.505	970.979	578.796	-0.48559	946.859	543.941	274.577	666.053	603.928	278.893	729.45	376.529	217.721	741.674	388.512	232.189	756.496	302.38	212.779	732.495	216.883	-297.901	704.038	617.406	-271.188	734.297	387.86	-206.775	749.435	396.14	-220.508	759.136	318.326	-199.574	731.802	227.393
441	4.4	3.19113	1130.9	464.274	66.324	1133.21	504.402	-66.6748	1126.41	501.985	167.141	964.306	582.139	-158.509	970.957	578.848	-0.47714	946.811	544.032	274.552	666.086	603.953	278.889	729.451	376.55	217.724	741.655	388.548	232.192	756.444	302.399	212.789	732.489	216.944	-297.944	704.06	617.457	-271.182	734.269	387.907	-206.634	749.31	395.972	-220.727	758.498	317.926	-199.558	731.776	227.433
442	4.41	3.17837	1130.9	464.302	66.3031	1133.24	504.425	-66.6905	1126.41	502.026	167.128	964.316	582.151	-158.516	970.946	578.884	-0.49751	946.765	544.105	274.531	666.069	603.933	278.882	729.457	376.567	217.711	741.648	388.557	232.192	756.442	302.429	212.775	732.494	216.953	-297.958	704.06	617.469	-271.173	734.259	387.909	-206.599	749.287	395.938	-220.792	758.34	317.852	-199.56	731.777	227.445
443	4.42	3.17851	1130.93	464.254	66.2879	1133.27	504.382	-66.6844	1126.43	502.017	167.131	964.32	582.151	-158.501	970.932	578.869	-0.48309	946.774	544.049	274.535	666.029	603.896	278.887	729.462	376.531	217.712	741.659	388.538	232.196	756.453	302.423	212.775	732.496	216.907	-297.941	704.031	617.46	-271.152	734.281	387.852	-206.576	749.319	395.878	-220.763	758.32	317.789	-199.547	731.807	227.378
444	4.43	3.15348	1130.96	464.234	66.2812	1133.26	504.381	-66.7028	1126.46	502.002	167.138	964.313	582.162	-158.495	970.915	578.843	-0.48752	946.791	544.023	274.547	665.99	603.884	278.897	729.468	376.543	217.737	741.681	388.573	232.203	756.484	302.451	212.787	732.489	216.9	-297.903	703.987	617.438	-271.167	734.309	387.857	-206.562	749.321	395.857	-220.733	758.316	317.763	-199.545	731.825	227.363
445	4.44	3.088	1131.01	464.222	66.2463	1133.26	504.411	-66.7549	1126.49	502.038	167.122	964.295	582.181	-158.512	970.905	578.86	-0.53221	946.786	544.061	274.549	665.95	603.872	278.904	729.46	376.567	217.733	741.689	388.606	232.184	756.545	302.446	212.785	732.479	216.913	-297.901	703.954	617.446	-271.199	734.327	387.898	-206.68	749.39	396.005	-220.648	758.677	318.054	-199.574	731.839	227.403
446	4.45	3.03263	1131.09	464.119	66.1989	1133.27	504.398	-66.8044	1126.51	502.051	167.095	964.28	582.17	-158.529	970.888	578.877	-0.56144	946.802	544.02	274.564	665.911	603.897	278.887	729.458	376.548	217.716	741.69	388.577	232.123	756.597	302.361	212.772	732.481	216.926	-297.89	703.89	617.409	-271.22	734.33	387.919	-206.891	749.542	396.312	-220.41	759.526	318.627	-199.605	731.852	227.398
447	4.46	3.01504	1131.13	464.053	66.1787	1133.28	504.389	-66.8325	1126.51	502.069	167.08	964.266	582.175	-158.527	970.867	578.869	-0.56392	946.808	543.969	274.575	665.896	603.91	278.873	729.451	376.531	217.72	741.681	388.571	232.112	756.605	302.363	212.774	732.474	216.926	-297.852	703.84	617.357	-271.237	734.326	387.916	-206.927	749.551	396.364	-220.346	759.721	318.76	-199.611	731.848	227.389
448	4.47	3.02436	1131.09	464.127	66.1766	1133.28	504.392	-66.8447	1126.48	502.097	167.075	964.257	582.177	-158.523	970.84	578.893	-0.55726	946.756	544.014	274.547	665.882	603.879	278.885	729.442	376.568	217.72	741.66	388.589	232.124	756.57	302.422	212.781	732.467	216.942	-297.858	703.819	617.336	-271.23	734.309	387.934	-206.944	749.537	396.401	-220.335	759.768	318.794	-199.605	731.815	227.405
449	4.48	3.04176	1131.03	464.246	66.1696	1133.29	504.381	-66.8361	1126.46	502.1	167.064	964.241	582.206	-158.527	970.827	578.957	-0.56209	946.708	544.115	274.501	665.889	603.878	278.872	729.44	376.582	217.696	741.651	388.577	232.144	756.533	302.44	212.777	732.472	216.956	-297.88	703.844	617.39	-271.21	734.277	387.959	-206.933	749.519	396.396	-220.332	759.781	318.797	-199.597	731.8	227.414
450	4.49	3.04291	1131.01	464.247	66.1558	1133.31	504.34	-66.8238	1126.45	502.071	167.056	964.224	582.202	-158.525	970.825	578.955	-0.55728	946.693	544.064	274.459	665.895	603.849	278.852	729.454	376.544	217.686	741.654	388.575	232.172	756.488	302.451	212.766	732.501	216.925	-297.88	703.847	617.416	-271.188	734.25	387.937	-206.908	749.524	396.366	-220.328	759.812	318.779	-199.58	731.802	227.41
451	4.5	3.04831	1131.01	464.233	66.1382	1133.32	504.298	-66.8119	1126.46	502.041	167.045	964.224	582.136	-158.518	970.807	578.942	-0.53979	946.689	543.979	274.434	665.889	603.811	278.848	729.453	376.511	217.678	741.651	388.52	232.201	756.476	302.443	212.767	732.515	216.911	-297.881	703.858	617.41	-271.177	734.257	387.887	-206.901	749.525	396.34	-220.309	759.821	318.743	-199.573	731.804	227.412
452	4.51	3.04801	1130.98	464.286	66.1168	1133.32	504.265	-66.8088	1126.45	502.032	167.043	964.22	582.125	-158.519	970.793	578.955	-0.53817	946.643	544.04	274.415	665.871	603.807	278.843	729.44	376.512	217.664	741.642	388.514	232.227	756.465	302.457	212.771	732.501	216.927	-297.888	703.858	617.453	-271.178	734.253	387.886	-206.909	749.507	396.369	-220.295	759.813	318.757	-199.568	731.801	227.404
453	4.52	3.02415	1130.99	464.272	66.1096	1133.32	504.288	-66.8237	1126.45	502.027	167.049	964.207	582.153	-158.511	970.786	578.947	-0.55778	946.632	544.071	274.404	665.832	603.815	278.864	729.446	376.551	217.679	741.64	388.569	232.211	756.47	302.44	212.774	732.495	216.933	-297.874	703.84	617.459	-271.18	734.274	387.9	-206.908	749.526	396.413	-220.296	759.82	318.773	-199.562	731.81	227.397
454	4.53	2.98809	1131.04	464.202	66.1091	1133.32	504.314	-66.8584	1126.47	502.039	167.022	964.191	582.139	-158.507	970.775	578.935	-0.58177	946.639	544.059	274.423	665.764	603.805	278.875	729.446	376.577	217.686	741.651	388.587	232.18	756.492	302.422	212.774	732.503	216.914	-297.851	703.788	617.385	-271.199	734.3	387.904	-206.905	749.541	396.419	-220.309	759.813	318.775	-199.58	731.834	227.413
455	4.54	2.94249	1131.06	464.147	66.1031	1133.31	504.315	-66.8996	1126.47	502.054	167.002	964.169	582.133	-158.511	970.75	578.931	-0.61145	946.624	544.074	274.455	665.693	603.78	278.866	729.421	376.593	217.683	741.646	388.61	232.159	756.547	302.403	212.784	732.481	216.952	-297.827	703.741	617.359	-271.226	734.291	387.909	-206.941	749.527	396.445	-220.343	759.793	318.797	-199.605	731.834	227.42
456	4.55	2.94006	1131.07	464.11	66.1053	1133.29	504.32	-66.9032	1126.46	502.043	167	964.143	582.149	-158.51	970.732	578.937	-0.60751	946.581	544.092	274.477	665.647	603.787	278.881	729.401	376.621	217.683	741.63	388.617	232.15	756.545	302.412	212.793	732.459	216.979	-297.81	703.728	617.357	-271.228	734.291	387.902	-206.95	749.51	396.425	-220.341	759.774	318.804	-199.623	731.832	227.424
457	4.56	2.97412	1131.08	464.076	66.1247	1133.28	504.283	-66.879	1126.47	502.019	167.019	964.142	582.158	-158.5	970.734	578.943	-0.57523	946.579	544.04	274.463	665.643	603.804	278.899	729.417	376.619	217.704	741.643	388.627	232.14	756.533	302.427	212.808	732.465	216.987	-297.793	703.718	617.329	-271.211	734.287	387.887	-206.927	749.532	396.431	-220.316	759.768	318.8	-199.603	731.833	227.421
458	4.57	3.00129	1131.1	464.069	66.1385	1133.31	504.273	-66.8794	1126.49	502.009	167.016	964.144	582.179	-158.508	970.752	578.925	-0.56317	946.601	543.986	274.433	665.65	603.797	278.885	729.454	376.61	217.705	741.661	388.649	232.156	756.565	302.477	212.802	732.486	216.972	-297.821	703.747	617.39	-271.208	734.292	387.901	-206.846	749.477	396.33	-220.442	759.417	318.568	-199.595	731.842	227.434
459	4.58	2.99807	1131.09	464.076	66.1211	1133.34	504.249	-66.8822	1126.48	501.985	166.999	964.141	582.18	-158.533	970.768	578.938	-0.57654	946.586	544.036	274.379	665.638	603.743	278.856	729.464	376.598	217.675	741.663	388.641	232.147	756.556	302.45	212.769	732.514	216.949	-297.88	703.799	617.475	-271.217	734.286	387.926	-206.778	749.387	396.185	-220.59	758.954	318.297	-199.598	731.839	227.459
460	4.59	3.01431	1131.04	464.084	66.1128	1133.31	504.19	-66.8458	1126.44	501.909	167.001	964.128	582.137	-158.533	970.741	578.901	-0.57855	946.534	544.004	274.349	665.658	603.737	278.842	729.466	376.575	217.641	741.645	388.572	232.161	756.501	302.419	212.778	732.504	216.942	-297.907	703.821	617.486	-271.196	734.266	387.917	-206.889	749.467	396.357	-220.373	759.586	318.69	-199.576	731.823	227.42
461	4.6	3.04831	1130.93	464.171	66.1273	1133.27	504.16	-66.814	1126.39	501.877	167.024	964.114	582.13	-158.523	970.714	578.864	-0.57286	946.501	543.973	274.329	665.674	603.747	278.842	729.459	376.555	217.64	741.631	388.567	232.195	756.451	302.442	212.79	732.491	216.929	-297.911	703.815	617.467	-271.18	734.257	387.91	-206.886	749.492	396.376	-220.312	759.745	318.749	-199.558	731.815	227.395
462	4.61	3.03781	1130.9	464.212	66.1116	1133.27	504.211	-66.8322	1126.39	501.929	167.022	964.12	582.156	-158.533	970.702	578.897	-0.58684	946.498	544.066	274.314	665.646	603.722	278.821	729.449	376.556	217.624	741.627	388.572	232.197	756.468	302.498	212.778	732.491	216.964	-297.924	703.809	617.478	-271.198	734.256	387.925	-206.833	749.449	396.295	-220.437	759.413	318.561	-199.582	731.811	227.43
463	4.62	3.02673	1130.9	464.191	66.1109	1133.27	504.208	-66.8498	1126.4	501.917	166.996	964.12	582.141	-158.53	970.701	578.916	-0.60631	946.497	544.095	274.329	665.647	603.727	278.823	729.438	376.569	217.624	741.628	388.57	232.162	756.49	302.471	212.771	732.5	216.991	-297.903	703.788	617.437	-271.207	734.274	387.912	-206.774	749.396	396.164	-220.604	758.975	318.254	-199.601	731.831	227.416
464	4.63	3.05374	1130.9	464.1	66.1262	1133.24	504.147	-66.8205	1126.38	501.83	167.015	964.102	582.12	-158.485	970.674	578.849	-0.59462	946.476	544.018	274.36	665.651	603.786	278.849	729.437	376.564	217.655	741.627	388.564	232.16	756.498	302.428	212.798	732.484	216.953	-297.862	703.753	617.383	-271.196	734.279	387.872	-206.878	749.496	396.31	-220.378	759.616	318.638	-199.589	731.821	227.392
465	4.64	3.0678	1130.91	464.022	66.1559	1133.21	504.174	-66.8146	1126.35	501.813	167.029	964.077	582.125	-158.468	970.631	578.846	-0.58428	946.462	543.989	274.356	665.607	603.786	278.867	729.439	376.605	217.675	741.625	388.575	232.188	756.523	302.421	212.825	732.465	216.97	-297.83	703.722	617.378	-271.2	734.272	387.864	-206.831	749.454	396.252	-220.434	759.371	318.46	-199.583	731.805	227.408
466	4.65	3.04015	1130.94	463.978	66.152	1133.2	504.19	-66.8402	1126.35	501.819	167.015	964.087	582.135	-158.489	970.624	578.876	-0.60922	946.456	544.023	274.347	665.571	603.764	278.862	729.442	376.613	217.664	741.639	388.598	232.158	756.58	302.41	212.805	732.472	216.977	-297.824	703.699	617.4	-271.234	734.278	387.885	-206.763	749.377	396.143	-220.601	758.921	318.203	-199.613	731.827	227.397
467	4.66	3.0261	1130.95	463.964	66.1292	1133.21	504.149	-66.8457	1126.35	501.806	166.991	964.091	582.117	-158.504	970.621	578.84	-0.6118	946.46	543.989	274.35	665.547	603.721	278.838	729.45	376.569	217.636	741.65	388.569	232.106	756.615	302.4	212.759	732.495	216.937	-297.822	703.681	617.408	-271.241	734.297	387.873	-206.842	749.41	396.269	-220.538	759.191	318.429	-199.626	731.839	227.393
468	4.67	3.07028	1130.92	464.007	66.1345	1133.2	504.098	-66.8199	1126.34	501.775	166.983	964.077	582.115	-158.499	970.614	578.819	-0.60009	946.457	543.987	274.339	665.554	603.718	278.828	729.444	376.548	217.631	741.648	388.551	232.103	756.594	302.417	212.756	732.511	216.905	-297.814	703.659	617.377	-271.227	734.286	387.886	-206.767	749.349	396.18	-220.63	758.875	318.235	-199.626	731.825	227.425
469	4.68	3.10198	1130.86	464.082	66.167	1133.22	504.167	-66.7927	1126.31	501.798	167.001	964.065	582.158	-158.491	970.621	578.846	-0.60049	946.433	544.06	274.312	665.576	603.743	278.832	729.451	376.564	217.624	741.645	388.588	232.156	756.547	302.458	212.773	732.506	216.936	-297.839	703.675	617.379	-271.205	734.266	387.924	-206.812	749.382	396.286	-220.542	759.178	318.447	-199.612	731.812	227.453
470	4.69	3.11353	1130.8	464.184	66.1774	1133.23	504.184	-66.7775	1126.31	501.815	167.015	964.051	582.17	-158.486	970.62	578.875	-0.5797	946.419	544.081	274.285	665.575	603.719	278.828	729.455	376.578	217.618	741.645	388.606	232.2	756.528	302.494	212.764	732.519	216.929	-297.857	703.676	617.407	-271.191	734.25	387.926	-206.741	749.322	396.185	-220.638	758.874	318.254	-199.608	731.8	227.466
471	4.7	3.14008	1130.84	464.122	66.1988	1133.23	504.14	-66.7313	1126.31	501.758	167.046	964.039	582.17	-158.466	970.61	578.851	-0.54903	946.444	544.021	274.272	665.517	603.695	278.836	729.462	376.567	217.628	741.644	388.606	232.192	756.521	302.448	212.768	732.52	216.912	-297.835	703.669	617.425	-271.167	734.247	387.926	-206.874	749.462	396.347	-220.393	759.581	318.653	-199.589	731.807	227.447
472	4.71	3.16707	1130.87	464.066	66.236	1133.22	504.155	-66.7119	1126.33	501.759	167.068	964.039	582.182	-158.43	970.592	578.854	-0.53325	946.44	544.008	274.277	665.454	603.641	278.849	729.437	376.59	217.645	741.647	388.619	232.184	756.492	302.433	212.802	732.496	216.945	-297.792	703.672	617.474	-271.164	734.259	387.941	-206.878	749.512	396.37	-220.302	759.773	318.761	-199.577	731.812	227.439
473	4.72	3.17056	1130.85	464.115	66.2667	1133.18	504.244	-66.7167	1126.34	501.782	167.075	964.024	582.209	-158.409	970.571	578.872	-0.52566	946.406	544.089	274.315	665.429	603.64	278.864	729.4	376.633	217.666	741.622	388.653	232.181	756.487	302.449	212.818	732.471	216.982	-297.766	703.675	617.465	-271.173	734.255	387.935	-206.885	749.52	396.401	-220.298	759.795	318.804	-199.585	731.818	227.455
474	4.73	3.15293	1130.88	464.107	66.2675	1133.17	504.274	-66.7357	1126.36	501.773	167.071	964.011	582.212	-158.397	970.571	578.877	-0.52926	946.389	544.11	274.345	665.401	603.619	278.88	729.394	376.651	217.671	741.617	388.654	232.15	756.491	302.469	212.835	732.468	217	-297.727	703.638	617.394	-271.192	734.271	387.917	-206.896	749.517	396.375	-220.321	759.803	318.823	-199.604	731.835	227.451
475	4.74	3.15618	1130.94	464.046	66.2649	1133.18	504.259	-66.722	1126.38	501.78	167.078	964.017	582.21	-158.384	970.582	578.865	-0.53154	946.412	544.052	274.353	665.354	603.566	278.885	729.4	376.655	217.685	741.633	388.662	232.152	756.521	302.49	212.842	732.483	217.023	-297.681	703.614	617.348	-271.187	734.283	387.908	-206.803	749.466	396.233	-220.445	759.447	318.565	-199.613	731.845	227.415
476	4.75	3.17566	1130.94	464.033	66.2921	1133.17	504.285	-66.6891	1126.39	501.797	167.093	963.99	582.201	-158.364	970.568	578.855	-0.50517	946.404	544.025	274.359	665.297	603.545	278.898	729.396	376.631	217.706	741.615	388.662	232.188	756.51	302.464	212.847	732.475	217.01	-297.688	703.612	617.387	-271.169	734.271	387.911	-206.714	749.376	396.119	-220.586	758.946	318.263	-199.605	731.838	227.414
477	4.76	3.19784	1130.91	464.057	66.329	1133.18	504.293	-66.6711	1126.36	501.787	167.104	963.965	582.19	-158.349	970.556	578.844	-0.47376	946.378	544.039	274.347	665.264	603.507	278.905	729.389	376.625	217.706	741.608	388.645	232.201	756.506	302.459	212.834	732.456	216.972	-297.723	703.631	617.445	-271.177	734.269	387.94	-206.861	749.469	396.337	-220.363	759.57	318.656	-199.604	731.822	227.427
478	4.77	3.18227	1130.94	464.03	66.2994	1133.21	504.248	-66.6685	1126.38	501.785	167.101	963.964	582.21	-158.358	970.571	578.856	-0.48156	946.386	544.043	274.331	665.296	603.544	278.875	729.389	376.596	217.662	741.625	388.62	232.192	756.529	302.476	212.79	732.468	216.979	-297.728	703.613	617.412	-271.192	734.274	387.962	-206.917	749.475	396.441	-220.329	759.739	318.747	-199.622	731.828	227.426
479	4.78	3.16015	1130.98	464.024	66.2711	1133.24	504.21	-66.6809	1126.4	501.8	167.076	963.967	582.217	-158.374	970.607	578.879	-0.50736	946.415	543.989	274.315	665.319	603.54	278.82	729.413	376.581	217.612	741.637	388.619	232.164	756.545	302.488	212.731	732.498	216.954	-297.741	703.629	617.4	-271.207	734.28	387.97	-206.938	749.489	396.419	-220.354	759.782	318.818	-199.642	731.839	227.412
480	4.79	3.17802	1130.93	464.121	66.2734	1133.25	504.199	-66.6761	1126.4	501.835	167.072	963.952	582.209	-158.374	970.614	578.872	-0.50799	946.363	544.097	274.309	665.326	603.526	278.81	729.425	376.583	217.594	741.635	388.615	232.141	756.531	302.463	212.729	732.505	216.959	-297.746	703.647	617.396	-271.224	734.264	387.985	-206.946	749.488	396.447	-220.376	759.774	318.867	-199.648	731.83	227.454
481	4.8	3.22749	1130.86	464.18	66.3299	1133.22	504.245	-66.6266	1126.38	501.813	167.111	963.915	582.218	-158.342	970.592	578.861	-0.46482	946.292	544.209	274.305	665.326	603.555	278.841	729.408	376.597	217.618	741.613	388.644	232.161	756.488	302.473	212.768	732.48	216.975	-297.725	703.66	617.416	-271.209	734.237	387.961	-206.912	749.48	396.453	-220.355	759.773	318.816	-199.623	731.807	227.434
482	4.81	3.28089	1130.86	464.141	66.4027	1133.2	504.301	-66.5556	1126.4	501.794	167.153	963.895	582.232	-158.306	970.57	578.871	-0.41916	946.28	544.228	274.296	665.287	603.576	278.863	729.398	376.621	217.645	741.602	388.654	232.193	756.468	302.478	212.798	732.477	217.015	-297.697	703.672	617.452	-271.17	734.244	387.943	-206.858	749.49	396.409	-220.315	759.795	318.78	-199.591	731.811	227.423
483	4.82	3.30535	1130.9	464.112	66.4453	1133.19	504.331	-66.5261	1126.44	501.803	167.182	963.892	582.259	-158.275	970.565	578.872	-0.41321	946.289	544.222	274.309	665.249	603.586	278.887	729.402	376.625	217.669	741.596	388.654	232.216	756.475	302.476	212.826	732.483	217.035	-297.661	703.683	617.474	-271.161	734.263	387.943	-206.849	749.509	396.382	-220.303	759.834	318.795	-199.578	731.824	227.41
484	4.83	3.35332	1130.96	464.093	66.5053	1133.19	504.337	-66.4981	1126.48	501.772	167.205	963.899	582.249	-158.248	970.582	578.872	-0.38557	946.333	544.176	274.342	665.234	603.577	278.916	729.408	376.668	217.695	741.61	388.665	232.211	756.504	302.452	212.846	732.492	217.03	-297.615	703.683	617.469	-271.151	734.286	387.921	-206.861	749.529	396.373	-220.295	759.853	318.805	-199.578	731.851	227.412
485	4.84	3.39896	1130.99	464.043	66.5678	1133.18	504.336	-66.4612	1126.5	501.73	167.224	963.896	582.237	-158.226	970.591	578.822	-0.35411	946.369	544.059	274.349	665.229	603.57	278.92	729.413	376.653	217.718	741.638	388.672	232.228	756.556	302.492	212.854	732.509	216.994	-297.617	703.668	617.425	-271.14	734.295	387.902	-206.853	749.548	396.382	-220.277	759.852	318.774	-199.561	731.87	227.425
486	4.85	3.41328	1130.99	463.984	66.5925	1133.17	504.326	-66.439	1126.51	501.711	167.209	963.886	582.22	-158.24	970.59	578.808	-0.36646	946.377	544.02	274.33	665.231	603.588	278.88	729.412	376.613	217.708	741.641	388.677	232.181	756.59	302.453	212.827	732.516	216.95	-297.645	703.653	617.413	-271.161	734.296	387.925	-206.888	749.542	396.422	-220.287	759.83	318.772	-199.585	731.867	227.437
487	4.86	3.42714	1130.97	464.016	66.575	1133.16	504.314	-66.4448	1126.5	501.726	167.175	963.873	582.208	-158.276	970.574	578.827	-0.42166	946.333	544.071	274.299	665.195	603.538	278.836	729.411	376.602	217.653	741.631	388.658	232.15	756.612	302.417	212.768	732.526	216.946	-297.696	703.629	617.421	-271.206	734.29	387.953	-206.856	749.449	396.372	-220.458	759.408	318.601	-199.63	731.84	227.435
488	4.87	3.44337	1130.93	464.056	66.5763	1133.16	504.314	-66.427	1126.48	501.713	167.163	963.857	582.213	-158.292	970.557	578.809	-0.4309	946.272	544.166	274.291	665.167	603.496	278.821	729.4	376.623	217.628	741.619	388.663	232.13	756.588	302.433	212.738	732.511	216.956	-297.721	703.627	617.402	-271.221	734.279	387.965	-206.786	749.352	396.228	-220.634	758.905	318.314	-199.644	731.811	227.457
489	4.88	3.48476	1130.86	464.051	66.6058	1133.14	504.311	-66.3759	1126.45	501.657	167.173	963.832	582.21	-158.268	970.549	578.771	-0.41136	946.215	544.238	274.279	665.171	603.476	278.827	729.387	376.602	217.621	741.6	388.644	232.162	756.542	302.494	212.754	732.495	216.967	-297.733	703.659	617.4	-271.194	734.254	387.94	-206.872	749.43	396.416	-220.423	759.532	318.707	-199.618	731.804	227.429
490	4.89	3.53856	1130.85	464.078	66.6508	1133.12	504.308	-66.3242	1126.45	501.653	167.198	963.81	582.211	-158.238	970.554	578.784	-0.38311	946.2	544.256	274.271	665.158	603.438	278.833	729.391	376.598	217.619	741.581	388.612	232.2	756.477	302.535	212.772	732.506	216.98	-297.722	703.696	617.415	-271.173	734.243	387.919	-206.871	749.454	396.438	-220.364	759.71	318.792	-199.607	731.812	227.428
491	4.9	3.5949	1130.88	464.063	66.7119	1133.11	504.356	-66.2888	1126.45	501.645	167.224	963.806	582.234	-158.217	970.575	578.791	-0.32937	946.235	544.283	274.273	665.124	603.425	278.855	729.4	376.636	217.646	741.584	388.628	232.225	756.466	302.545	212.793	732.505	217.012	-297.699	703.721	617.45	-271.169	734.246	387.931	-206.863	749.473	396.414	-220.317	759.809	318.806	-199.608	731.831	227.444
492	4.91	3.64523	1130.93	463.949	66.7703	1133.1	504.349	-66.2487	1126.48	501.586	167.246	963.81	582.203	-158.187	970.577	578.767	-0.27791	946.292	544.218	274.297	665.061	603.408	278.908	729.394	376.646	217.692	741.586	388.635	232.224	756.495	302.502	212.825	732.502	216.997	-297.649	703.749	617.509	-271.152	734.281	387.942	-206.843	749.511	396.376	-220.275	759.859	318.794	-199.592	731.838	227.441
493	4.92	3.69184	1130.95	463.807	66.8099	1133.07	504.338	-66.2152	1126.5	501.54	167.272	963.787	582.162	-158.151	970.542	578.742	-0.26569	946.323	544.054	274.322	665.039	603.435	278.94	729.376	376.66	217.72	741.573	388.63	232.209	756.504	302.42	212.849	732.482	216.999	-297.596	703.727	617.502	-271.125	734.292	387.901	-206.83	749.526	396.347	-220.259	759.851	318.763	-199.582	731.845	227.384
494	4.93	3.68161	1130.93	463.833	66.8144	1133.05	504.345	-66.2171	1126.49	501.561	167.259	963.753	582.187	-158.156	970.52	578.739	-0.3034	946.314	544.062	274.342	665.019	603.456	278.929	729.349	376.682	217.721	741.569	388.681	232.218	756.516	302.476	212.847	732.458	217.052	-297.582	703.651	617.418	-271.15	734.288	387.919	-206.799	749.456	396.305	-220.408	759.435	318.552	-199.599	731.834	227.414
495	4.94	3.64167	1130.91	463.907	66.8065	1133.04	504.357	-66.2398	1126.48	501.591	167.237	963.761	582.216	-158.177	970.538	578.768	-0.3518	946.295	544.182	274.342	665.011	603.436	278.904	729.338	376.681	217.695	741.583	388.729	232.175	756.553	302.504	212.813	732.464	217.053	-297.598	703.593	617.373	-271.198	734.288	387.974	-206.733	749.369	396.21	-220.605	758.929	318.298	-199.647	731.828	227.475
496	4.95	3.63882	1130.9	463.876	66.7972	1133.03	504.303	-66.2413	1126.47	501.595	167.226	963.756	582.193	-158.177	970.536	578.759	-0.36705	946.285	544.149	274.337	665.005	603.424	278.878	729.347	376.662	217.668	741.585	388.689	232.14	756.559	302.494	212.778	732.477	216.993	-297.609	703.578	617.35	-271.214	734.281	387.962	-206.863	749.452	396.409	-220.42	759.539	318.734	-199.663	731.823	227.452
497	4.96	3.67474	1130.85	463.863	66.8072	1133.02	504.276	-66.2163	1126.44	501.567	167.238	963.733	582.202	-158.164	970.52	578.744	-0.34094	946.244	544.138	274.309	665.002	603.445	278.859	729.35	376.643	217.65	741.578	388.638	232.155	756.526	302.49	212.762	732.482	216.956	-297.633	703.619	617.416	-271.194	734.242	387.973	-206.891	749.455	396.45	-220.364	759.694	318.795	-199.637	731.789	227.455
498	4.97	3.73639	1130.83	463.903	66.8298	1133.02	504.32	-66.1988	1126.41	501.546	167.258	963.716	582.231	-158.164	970.516	578.781	-0.29077	946.196	544.244	274.277	665.003	603.469	278.863	729.369	376.633	217.65	741.594	388.661	232.221	756.509	302.554	212.767	732.494	216.98	-297.67	703.672	617.506	-271.18	734.226	388.006	-206.903	749.449	396.479	-220.348	759.761	318.832	-199.624	731.79	227.506
499	4.98	3.78163	1130.85	463.834	66.8306	1133.04	504.267	-66.1831	1126.43	501.515	167.264	963.724	582.21	-158.158	970.541	578.75	-0.24521	946.22	544.23	274.255	665.014	603.448	278.869	729.398	376.624	217.639	741.615	388.626	232.236	756.505	302.536	212.787	732.529	216.981	-297.675	703.716	617.52	-271.166	734.252	387.968	-206.89	749.471	396.449	-220.317	759.81	318.833	-199.611	731.807	227.473
500	4.99	3.80317	1130.88	463.715	66.8421	1133.04	504.198	-66.1478	1126.45	501.456	167.287	963.728	582.164	-158.143	970.562	578.7	-0.22597	946.275	544.076	274.25	665.019	603.41	278.882	729.411	376.608	217.647	741.615	388.56	232.22	756.496	302.49	212.808	732.534	216.965	-297.659	703.748	617.516	-271.143	734.268	387.919	-206.844	749.504	396.349	-220.287	759.823	318.804	-199.596	731.821	227.418
501	5	3.81376	1130.83	463.741	66.873	1133.01	504.204	-66.1275	1126.44	501.439	167.31	963.714	582.17	-158.121	970.534	578.676	-0.20837	946.225	544.108	274.269	665.008	603.416	278.901	729.399	376.638	217.684	741.596	388.621	232.234	756.499	302.487	212.834	732.508	217.014	-297.631	703.746	617.524	-271.119	734.256	387.952	-206.836	749.495	396.378	-220.28	759.806	318.824	-199.592	731.809	227.431
502	5.01	3.7834	1130.81	463.843	66.8943	1132.99	504.243	-66.1415	1126.43	501.491	167.315	963.703	582.206	-158.111	970.518	578.712	-0.21679	946.181	544.248	274.291	664.977	603.426	278.919	729.385	376.69	217.704	741.583	388.704	232.224	756.516	302.533	212.853	732.495	217.057	-297.606	703.693	617.469	-271.135	734.263	387.996	-206.862	749.504	396.463	-220.295	759.791	318.844	-199.599	731.812	227.468
503	5.02	3.74741	1130.8	463.796	66.8831	1132.98	504.222	-66.1517	1126.44	501.5	167.292	963.707	582.191	-158.107	970.518	578.714	-0.25975	946.232	544.182	274.31	664.948	603.441	278.912	729.371	376.688	217.697	741.593	388.716	232.175	756.536	302.492	212.84	732.491	217.021	-297.574	703.65	617.442	-271.162	734.292	387.978	-206.801	749.456	396.317	-220.443	759.422	318.599	-199.617	731.833	227.476
504	5.03	3.74111	1130.82	463.729	66.883	1132.97	504.207	-66.172	1126.45	501.458	167.279	963.705	582.16	-158.111	970.514	578.685	-0.28437	946.268	544.072	274.322	664.931	603.429	278.91	729.355	376.681	217.699	741.589	388.722	232.159	756.558	302.465	212.822	732.491	217.009	-297.559	703.642	617.443	-271.168	734.296	387.952	-206.714	749.374	396.13	-220.6	758.937	318.28	-199.62	731.84	227.451
505	5.04	3.76717	1130.81	463.731	66.9042	1132.95	504.228	-66.1668	1126.44	501.453	167.299	963.708	582.182	-158.104	970.517	578.712	-0.25299	946.242	544.167	274.318	664.938	603.429	278.922	729.355	376.702	217.717	741.604	388.736	232.179	756.554	302.475	212.832	732.496	217.022	-297.577	703.642	617.425	-271.16	734.29	387.981	-206.835	749.483	396.387	-220.372	759.581	318.715	-199.609	731.852	227.461
506	5.05	3.79025	1130.79	463.721	66.9105	1132.96	504.217	-66.1428	1126.42	501.46	167.313	963.702	582.185	-158.091	970.515	578.708	-0.23561	946.232	544.151	274.291	664.947	603.408	278.919	729.379	376.685	217.703	741.617	388.704	232.216	756.523	302.52	212.832	732.513	217.005	-297.591	703.68	617.45	-271.148	734.283	387.964	-206.846	749.525	396.402	-220.302	759.748	318.814	-199.597	731.849	227.438
507	5.06	3.7884	1130.8	463.66	66.8874	1132.96	504.169	-66.1356	1126.41	501.413	167.29	963.691	582.159	-158.098	970.51	578.684	-0.21333	946.23	544.101	274.262	664.96	603.401	278.882	729.394	376.623	217.671	741.619	388.641	232.205	756.508	302.498	212.811	732.546	216.979	-297.602	703.715	617.517	-271.14	734.267	387.948	-206.851	749.527	396.354	-220.307	759.792	318.813	-199.602	731.832	227.438
508	5.07	3.78214	1130.76	463.736	66.8693	1132.96	504.197	-66.1463	1126.4	501.379	167.273	963.679	582.178	-158.122	970.497	578.694	-0.20787	946.191	544.234	274.254	664.966	603.389	278.864	729.404	376.61	217.659	741.598	388.636	232.233	756.487	302.53	212.807	732.537	217.012	-297.64	703.705	617.505	-271.148	734.255	387.974	-206.858	749.505	396.389	-220.326	759.809	318.81	-199.609	731.808	227.459
509	5.08	3.78031	1130.7	463.797	66.8637	1132.94	504.198	-66.1493	1126.36	501.407	167.284	963.663	582.182	-158.121	970.47	578.711	-0.21575	946.135	544.347	274.266	664.965	603.383	278.882	729.387	376.634	217.658	741.575	388.647	232.268	756.462	302.545	212.821	732.518	217.032	-297.649	703.683	617.479	-271.154	734.241	387.958	-206.852	749.468	396.451	-220.331	759.798	318.81	-199.6	731.789	227.46
510	5.09	3.78213	1130.69	463.744	66.8617	1132.92	504.199	-66.148	1126.33	501.381	167.279	963.65	582.16	-158.117	970.441	578.688	-0.24303	946.101	544.327	274.293	664.98	603.414	278.881	729.357	376.62	217.669	741.555	388.67	232.259	756.46	302.522	212.828	732.483	217.023	-297.621	703.65	617.456	-271.151	734.234	387.923	-206.856	749.446	396.431	-220.333	759.781	318.802	-199.598	731.787	227.432
511	5.1	3.74875	1130.71	463.675	66.8498	1132.91	504.198	-66.1684	1126.35	501.364	167.251	963.671	582.163	-158.132	970.436	578.699	-0.29547	946.133	544.23	274.305	664.974	603.418	278.871	729.345	376.62	217.667	741.57	388.71	232.215	756.5	302.502	212.806	732.474	217.024	-297.578	703.575	617.393	-271.166	734.238	387.926	-206.882	749.463	396.393	-220.339	759.784	318.826	-199.613	731.802	227.425
512	5.11	3.71138	1130.74	463.673	66.841	1132.92	504.202	-66.2206	1126.38	501.398	167.237	963.694	582.175	-158.145	970.446	578.686	-0.3395	946.2	544.172	274.338	664.956	603.401	278.888	729.364	376.663	217.674	741.593	388.727	232.185	756.563	302.501	212.798	732.489	217.022	-297.539	703.526	617.365	-271.193	734.278	387.959	-206.925	749.494	396.443	-220.353	759.803	318.836	-199.653	731.84	227.459
513	5.12	3.70602	1130.77	463.64	66.8356	1132.93	504.16	-66.2305	1126.41	501.371	167.243	963.698	582.166	-158.134	970.441	578.657	-0.34693	946.224	544.071	274.355	664.943	603.418	278.888	729.364	376.661	217.688	741.601	388.723	232.162	756.596	302.5	212.804	732.492	217.004	-297.501	703.528	617.398	-271.198	734.311	387.962	-206.903	749.526	396.451	-220.341	759.813	318.836	-199.65	731.867	227.447
514	5.13	3.71861	1130.78	463.575	66.8331	1132.94	504.145	-66.2082	1126.4	501.344	167.25	963.7	582.159	-158.111	970.434	578.647	-0.30831	946.234	544.059	274.341	664.954	603.448	278.891	729.363	376.655	217.691	741.602	388.698	232.163	756.562	302.511	212.818	732.486	217.02	-297.481	703.508	617.372	-271.164	734.3	387.936	-206.788	749.481	396.286	-220.425	759.428	318.561	-199.631	731.871	227.399
515	5.14	3.72255	1130.77	463.618	66.8289	1132.95	504.19	-66.1972	1126.37	501.342	167.253	963.7	582.194	-158.112	970.432	578.697	-0.27388	946.217	544.16	274.319	664.978	603.462	278.901	729.379	376.678	217.705	741.624	388.732	232.19	756.537	302.56	212.838	732.508	217.053	-297.499	703.521	617.406	-271.141	734.289	387.968	-206.598	749.333	396.044	-220.684	758.58	318.014	-199.609	731.867	227.429
516	5.15	3.71772	1130.74	463.673	66.8003	1132.97	504.151	-66.1961	1126.34	501.36	167.259	963.697	582.209	-158.121	970.424	578.723	-0.23821	946.195	544.241	274.301	664.985	603.433	278.894	729.391	376.675	217.703	741.619	388.717	232.212	756.522	302.558	212.84	732.526	217.077	-297.552	703.577	617.493	-271.129	734.265	387.998	-206.626	749.337	396.12	-220.635	758.755	318.165	-199.601	731.858	227.455
517	5.16	3.73676	1130.7	463.67	66.7922	1132.96	504.119	-66.1928	1126.31	501.341	167.276	963.662	582.16	-158.107	970.402	578.659	-0.19407	946.16	544.289	274.283	664.985	603.401	278.897	729.399	376.641	217.676	741.582	388.621	232.242	756.46	302.533	212.834	732.517	217.032	-297.572	703.583	617.482	-271.107	734.248	387.946	-206.751	749.421	396.302	-220.353	759.547	318.639	-199.58	731.818	227.441
518	5.17	3.73977	1130.66	463.729	66.7934	1132.94	504.146	-66.2158	1126.28	501.343	167.281	963.63	582.162	-158.103	970.381	578.66	-0.20314	946.092	544.405	274.262	664.972	603.383	278.892	729.397	376.632	217.685	741.547	388.635	232.29	756.415	302.555	212.838	732.507	217.026	-297.582	703.562	617.46	-271.106	734.221	387.966	-206.783	749.406	396.38	-220.297	759.74	318.764	-199.58	731.79	227.442
519	5.18	3.65784	1130.64	463.806	66.7604	1132.93	504.169	-66.2701	1126.26	501.396	167.255	963.625	582.209	-158.128	970.372	578.718	-0.25427	946.059	544.497	274.266	664.951	603.384	278.874	729.378	376.676	217.682	741.546	388.705	232.255	756.43	302.563	212.82	732.496	217.089	-297.595	703.546	617.474	-271.146	734.212	388.012	-206.838	749.404	396.456	-220.338	759.779	318.824	-199.613	731.793	227.472
520	5.19	3.59626	1130.66	463.776	66.7167	1132.92	504.121	-66.3173	1126.27	501.405	167.227	963.645	582.188	-158.156	970.376	578.706	-0.30327	946.113	544.402	274.289	664.933	603.397	278.867	729.347	376.683	217.648	741.567	388.692	232.195	756.481	302.539	212.812	732.473	217.095	-297.579	703.501	617.425	-271.185	734.223	388.004	-206.812	749.369	396.364	-220.486	759.381	318.592	-199.644	731.806	227.46
521	5.2	3.56321	1130.7	463.705	66.682	1132.92	504.059	-66.3535	1126.28	501.399	167.222	963.662	582.166	-158.148	970.368	578.69	-0.34552	946.178	544.202	274.304	664.913	603.379	278.874	729.34	376.655	217.66	741.569	388.68	232.156	756.538	302.498	212.811	732.477	217.042	-297.533	703.476	617.408	-271.182	734.264	387.993	-206.709	749.343	396.185	-220.616	758.925	318.289	-199.645	731.831	227.446
522	5.21	3.54479	1130.72	463.652	66.6739	1132.92	504.027	-66.3658	1126.31	501.428	167.229	963.679	582.181	-158.127	970.371	578.703	-0.34909	946.196	544.152	274.332	664.921	603.423	278.903	729.347	376.714	217.687	741.58	388.723	232.179	756.538	302.535	212.816	732.483	217.055	-297.499	703.469	617.421	-271.17	734.292	388.027	-206.828	749.483	396.407	-220.377	759.596	318.723	-199.625	731.863	227.464
523	5.22	3.51866	1130.73	463.628	66.6695	1132.94	504.019	-66.3783	1126.32	501.429	167.231	963.682	582.179	-158.126	970.396	578.703	-0.33212	946.238	544.104	274.34	664.926	603.437	278.922	729.368	376.712	217.698	741.605	388.73	232.188	756.561	302.539	212.822	732.506	217.043	-297.49	703.491	617.426	-271.163	734.313	388.02	-206.801	749.484	396.324	-220.448	759.403	318.555	-199.626	731.88	227.46
524	5.23	3.50874	1130.75	463.591	66.6409	1132.97	503.955	-66.3908	1126.34	501.373	167.225	963.68	582.154	-158.142	970.415	578.693	-0.31141	946.27	544.012	274.331	664.894	603.407	278.9	729.392	376.638	217.696	741.61	388.679	232.185	756.571	302.503	212.82	732.532	217.001	-297.511	703.52	617.455	-271.153	734.313	387.961	-206.624	749.368	396.02	-220.705	758.607	317.976	-199.62	731.878	227.443
525	5.24	3.52893	1130.72	463.579	66.6282	1132.95	503.902	-66.3796	1126.3	501.377	167.218	963.652	582.123	-158.144	970.395	578.673	-0.2739	946.211	544.027	274.306	664.892	603.399	278.906	729.391	376.621	217.693	741.596	388.645	232.213	756.535	302.506	212.83	732.513	216.998	-297.537	703.524	617.468	-271.132	734.269	387.935	-206.622	749.382	396.078	-220.635	758.771	318.071	-199.597	731.854	227.422
526	5.25	3.51695	1130.64	463.669	66.6292	1132.93	503.948	-66.3723	1126.23	501.388	167.222	963.593	582.112	-158.153	970.354	578.69	-0.2474	946.067	544.298	274.279	664.91	603.397	278.902	729.368	376.643	217.679	741.574	388.68	232.248	756.478	302.523	212.835	732.492	217.04	-297.571	703.511	617.459	-271.122	734.216	387.971	-206.786	749.442	396.364	-220.382	759.546	318.631	-199.591	731.816	227.457
527	5.26	3.49205	1130.58	463.782	66.5928	1132.91	503.937	-66.395	1126.18	501.377	167.205	963.561	582.105	-158.177	970.341	578.69	-0.26775	946.001	544.443	274.252	664.924	603.399	278.877	729.349	376.661	217.653	741.548	388.698	232.24	756.434	302.534	212.816	732.494	217.065	-297.604	703.496	617.434	-271.128	734.191	387.994	-206.825	749.41	396.394	-220.349	759.734	318.802	-199.602	731.794	227.48
528	5.27	3.4778	1130.58	463.771	66.5812	1132.91	503.88	-66.4057	1126.18	501.376	167.189	963.565	582.085	-158.197	970.345	578.65	-0.29141	946.022	544.398	274.234	664.933	603.4	278.857	729.358	376.651	217.641	741.546	388.672	232.22	756.451	302.536	212.801	732.501	217.039	-297.619	703.474	617.402	-271.147	734.198	387.985	-206.841	749.404	396.402	-220.348	759.787	318.84	-199.62	731.793	227.488
529	5.28	3.4909	1130.59	463.716	66.5964	1132.88	503.879	-66.3984	1126.19	501.366	167.2	963.578	582.089	-158.177	970.337	578.646	-0.28998	946.04	544.329	274.228	664.935	603.382	278.86	729.367	376.646	217.648	741.56	388.653	232.245	756.474	302.534	212.823	732.503	217.021	-297.598	703.465	617.418	-271.134	734.214	387.966	-206.769	749.37	396.321	-220.442	759.412	318.6	-199.61	731.801	227.473
530	5.29	3.52216	1130.58	463.679	66.614	1132.86	503.88	-66.4007	1126.19	501.343	167.212	963.618	582.12	-158.163	970.341	578.664	-0.27898	946.053	544.273	274.237	664.93	603.406	278.892	729.381	376.671	217.674	741.573	388.685	232.259	756.513	302.527	212.858	732.496	217.05	-297.569	703.463	617.423	-271.125	734.231	387.961	-206.664	749.325	396.212	-220.567	758.957	318.29	-199.595	731.806	227.473
531	5.3	3.53123	1130.61	463.599	66.6161	1132.87	503.845	-66.3985	1126.22	501.282	167.189	963.65	582.105	-158.171	970.344	578.656	-0.31173	946.146	544.135	274.249	664.946	603.447	278.913	729.405	376.67	217.678	741.595	388.689	232.212	756.572	302.507	212.86	732.507	217.021	-297.539	703.433	617.394	-271.136	734.27	387.954	-206.814	749.478	396.393	-220.346	759.633	318.686	-199.602	731.839	227.459
532	5.31	3.52544	1130.64	463.507	66.5978	1132.87	503.797	-66.4132	1126.24	501.228	167.172	963.678	582.106	-158.196	970.341	578.651	-0.36242	946.22	543.99	274.249	664.952	603.474	278.882	729.41	376.631	217.658	741.626	388.674	232.153	756.624	302.456	212.832	732.535	216.988	-297.532	703.425	617.419	-271.147	734.295	387.935	-206.85	749.543	396.37	-220.297	759.806	318.772	-199.618	731.873	227.435
533	5.32	3.51846	1130.63	463.469	66.5781	1132.85	503.786	-66.4196	1126.23	501.233	167.152	963.685	582.118	-158.211	970.326	578.623	-0.39226	946.208	543.977	274.25	664.953	603.455	278.867	729.408	376.642	217.644	741.635	388.672	232.123	756.629	302.444	212.818	732.539	217.008	-297.544	703.433	617.454	-271.15	734.291	387.945	-206.846	749.553	396.385	-220.294	759.83	318.819	-199.621	731.872	227.453
534	5.33	3.52274	1130.6	463.484	66.5592	1132.83	503.758	-66.4224	1126.19	501.245	167.134	963.676	582.107	-158.225	970.315	578.641	-0.40032	946.157	544.046	274.261	664.956	603.449	278.87	729.4	376.685	217.651	741.626	388.69	232.136	756.607	302.495	212.816	732.53	217.014	-297.553	703.438	617.472	-271.162	734.272	387.991	-206.857	749.531	396.438	-220.312	759.818	318.848	-199.631	731.865	227.485
535	5.34	3.53202	1130.54	463.504	66.5555	1132.81	503.754	-66.4098	1126.14	501.221	167.135	963.635	582.067	-158.227	970.301	578.653	-0.39895	946.087	544.137	274.254	664.965	603.458	278.876	729.394	376.681	217.639	741.604	388.679	232.171	756.552	302.534	212.814	732.514	217.013	-297.568	703.424	617.478	-271.16	734.242	387.974	-206.884	749.509	396.386	-220.315	759.834	318.822	-199.624	731.845	227.452
536	5.35	3.55197	1130.49	463.505	66.5506	1132.79	503.772	-66.4088	1126.11	501.209	167.151	963.602	582.059	-158.221	970.279	578.646	-0.37474	946.036	544.239	274.239	664.959	603.447	278.864	729.388	376.652	217.627	741.57	388.633	232.231	756.476	302.533	212.817	732.506	217.038	-297.578	703.403	617.462	-271.151	734.223	387.972	-206.863	749.474	396.394	-220.314	759.848	318.806	-199.604	731.82	227.445
537	5.36	3.57169	1130.45	463.546	66.5768	1132.78	503.797	-66.3985	1126.08	501.214	167.171	963.605	582.081	-158.214	970.26	578.634	-0.33548	946.008	544.325	274.216	664.958	603.426	278.857	729.367	376.624	217.633	741.543	388.621	232.276	756.437	302.546	212.834	732.497	217.047	-297.571	703.41	617.448	-271.126	734.207	387.977	-206.845	749.434	396.439	-220.3	759.853	318.829	-199.582	731.811	227.446
538	5.37	3.58858	1130.44	463.515	66.5921	1132.77	503.78	-66.3859	1126.07	501.177	167.164	963.603	582.087	-158.202	970.259	578.599	-0.30993	945.994	544.332	274.214	664.96	603.429	278.868	729.37	376.63	217.653	741.539	388.642	232.278	756.423	302.539	212.843	732.493	217.047	-297.558	703.42	617.444	-271.115	734.206	387.962	-206.851	749.437	396.411	-220.284	759.845	318.83	-199.571	731.805	227.447
539	5.38	3.57203	1130.44	463.482	66.5741	1132.76	503.766	-66.4152	1126.06	501.139	167.151	963.597	582.083	-158.214	970.247	578.554	-0.32298	945.996	544.284	274.227	664.935	603.427	278.877	729.368	376.652	217.658	741.556	388.645	232.258	756.451	302.547	212.846	732.486	217.046	-297.555	703.385	617.419	-271.121	734.219	387.979	-206.848	749.465	396.356	-220.295	759.837	318.816	-199.603	731.813	227.447
540	5.39	3.52083	1130.47	463.508	66.5627	1132.76	503.803	-66.456	1126.07	501.159	167.128	963.608	582.125	-158.241	970.235	578.581	-0.36707	946.037	544.226	274.227	664.881	603.398	278.873	729.353	376.669	217.656	741.574	388.696	232.215	756.512	302.6	212.831	732.482	217.066	-297.545	703.325	617.365	-271.146	734.245	388.015	-206.81	749.416	396.304	-220.443	759.435	318.598	-199.647	731.838	227.478
541	5.4	3.49188	1130.5	463.525	66.5415	1132.76	503.791	-66.4844	1126.09	501.17	167.12	963.623	582.135	-158.259	970.243	578.594	-0.41118	946.094	544.149	274.243	664.86	603.358	278.885	729.354	376.689	217.652	741.577	388.733	232.163	756.574	302.537	212.81	732.486	217.055	-297.529	703.325	617.385	-271.173	734.268	387.992	-206.734	749.354	396.197	-220.594	758.95	318.298	-199.654	731.863	227.476
542	5.41	3.51421	1130.52	463.46	66.5428	1132.76	503.769	-66.481	1126.11	501.132	167.138	963.621	582.091	-158.244	970.239	578.565	-0.40167	946.115	544.051	274.251	664.883	603.387	278.897	729.349	376.68	217.673	741.572	388.714	232.173	756.571	302.511	212.841	732.487	217.025	-297.511	703.313	617.362	-271.159	734.285	387.952	-206.816	749.461	396.327	-220.349	759.595	318.678	-199.632	731.871	227.411
543	5.42	3.53602	1130.52	463.437	66.5695	1132.77	503.779	-66.4613	1126.11	501.136	167.175	963.623	582.094	-158.209	970.237	578.567	-0.34241	946.105	544.11	274.248	664.896	603.422	278.933	729.35	376.722	217.703	741.569	388.718	232.224	756.554	302.53	212.877	732.493	217.044	-297.483	703.314	617.359	-271.123	734.27	387.952	-206.822	749.509	396.383	-220.265	759.785	318.775	-199.594	731.879	227.415
544	5.43	3.53973	1130.51	463.512	66.5784	1132.8	503.802	-66.4549	1126.1	501.206	167.182	963.644	582.113	-158.194	970.247	578.607	-0.32013	946.092	544.197	274.245	664.911	603.439	278.937	729.373	376.731	217.703	741.581	388.709	232.266	756.56	302.556	212.87	732.503	217.043	-297.5	703.334	617.429	-271.115	734.252	388.004	-206.843	749.517	396.478	-220.261	759.853	318.853	-199.591	731.873	227.44
545	5.44	3.51405	1130.5	463.555	66.5478	1132.82	503.759	-66.4613	1126.09	501.249	167.182	963.634	582.111	-158.196	970.25	578.607	-0.33122	946.077	544.237	274.225	664.932	603.434	278.905	729.382	376.657	217.674	741.597	388.675	232.271	756.552	302.535	212.858	732.521	216.992	-297.521	703.364	617.471	-271.115	734.246	387.999	-206.871	749.475	396.509	-220.258	759.851	318.882	-199.601	731.851	227.459
546	5.45	3.50859	1130.5	463.55	66.5329	1132.82	503.742	-66.4654	1126.07	501.267	167.191	963.615	582.109	-158.197	970.244	578.604	-0.3265	946.019	544.301	274.201	664.948	603.419	278.88	729.399	376.612	217.652	741.585	388.671	232.249	756.504	302.523	212.85	732.52	216.998	-297.538	703.374	617.454	-271.111	734.236	387.974	-206.851	749.464	396.499	-220.262	759.825	318.847	-199.592	731.829	227.461
547	5.46	3.47654	1130.48	463.611	66.5028	1132.83	503.747	-66.4808	1126.06	501.294	167.169	963.617	582.111	-158.211	970.244	578.622	-0.33275	945.992	544.39	274.178	664.955	603.431	278.855	729.404	376.646	217.641	741.571	388.702	232.228	756.494	302.535	212.822	732.52	217.032	-297.553	703.348	617.399	-271.131	734.228	387.997	-206.846	749.457	396.492	-220.301	759.811	318.844	-199.604	731.823	227.463
548	5.47	3.41894	1130.49	463.682	66.4415	1132.85	503.737	-66.5271	1126.07	501.319	167.141	963.621	582.103	-158.244	970.249	578.632	-0.36484	946.013	544.383	274.183	664.962	603.439	278.83	729.394	376.654	217.605	741.579	388.693	232.157	756.518	302.481	212.772	732.522	217.022	-297.553	703.332	617.404	-271.149	734.221	388.01	-206.875	749.464	396.515	-220.328	759.808	318.904	-199.635	731.828	227.483
549	5.48	3.41466	1130.5	463.664	66.4438	1132.83	503.728	-66.5213	1126.07	501.291	167.154	963.606	582.085	-158.238	970.245	578.612	-0.36124	946.022	544.319	274.205	664.939	603.412	278.822	729.39	376.616	217.613	741.57	388.657	232.169	756.515	302.496	212.792	732.506	217.009	-297.511	703.32	617.369	-271.141	734.223	387.964	-206.862	749.474	396.438	-220.313	759.799	318.875	-199.637	731.828	227.472
550	5.49	3.43579	1130.49	463.612	66.4943	1132.78	503.768	-66.4849	1126.05	501.291	167.188	963.589	582.08	-158.201	970.238	578.603	-0.3274	946.017	544.322	274.251	664.929	603.411	278.862	729.376	376.642	217.654	741.556	388.671	232.208	756.494	302.529	212.854	732.491	217.038	-297.454	703.313	617.326	-271.117	734.226	387.929	-206.822	749.493	396.412	-220.299	759.801	318.802	-199.619	731.831	227.452
551	5.5	3.43281	1130.5	463.653	66.5403	1132.77	503.829	-66.4781	1126.07	501.326	167.191	963.592	582.097	-158.19	970.26	578.629	-0.32915	946.046	544.325	274.281	664.906	603.414	278.885	729.365	376.68	217.668	741.549	388.71	232.21	756.527	302.512	212.867	732.486	217.07	-297.435	703.344	617.382	-271.129	734.228	387.97	-206.836	749.5	396.474	-220.319	759.819	318.783	-199.625	731.843	227.458
552	5.51	3.41673	1130.54	463.64	66.5305	1132.79	503.83	-66.4917	1126.11	501.296	167.181	963.603	582.115	-158.203	970.293	578.625	-0.37306	946.124	544.246	274.293	664.9	603.412	278.873	729.381	376.666	217.644	741.572	388.673	232.177	756.586	302.494	212.842	732.498	217.041	-297.439	703.378	617.433	-271.141	734.238	387.993	-206.781	749.429	396.361	-220.467	759.445	318.575	-199.645	731.857	227.444
553	5.52	3.43666	1130.56	463.546	66.5253	1132.79	503.804	-66.4805	1126.13	501.248	167.186	963.621	582.073	-158.203	970.327	578.592	-0.36717	946.16	544.155	274.292	664.911	603.391	278.863	729.385	376.625	217.641	741.588	388.64	232.145	756.6	302.452	212.826	732.507	217.005	-297.449	703.396	617.413	-271.134	734.248	387.961	-206.675	749.357	396.172	-220.6	758.954	318.253	-199.631	731.863	227.412
554	5.53	3.46956	1130.54	463.543	66.5431	1132.8	503.799	-66.4579	1126.13	501.258	167.185	963.62	582.06	-158.218	970.344	578.576	-0.34249	946.146	544.211	274.278	664.914	603.382	278.854	729.387	376.608	217.648	741.586	388.657	232.15	756.579	302.454	212.821	732.505	217.034	-297.51	703.416	617.421	-271.141	734.242	387.97	-206.813	749.448	396.362	-220.378	759.588	318.689	-199.625	731.859	227.425
555	5.54	3.48247	1130.51	463.572	66.5457	1132.79	503.822	-66.4545	1126.11	501.314	167.179	963.62	582.072	-158.24	970.363	578.603	-0.34636	946.129	544.299	274.253	664.924	603.386	278.827	729.387	376.612	217.632	741.585	388.687	232.179	756.56	302.496	212.784	732.511	217.03	-297.584	703.457	617.463	-271.168	734.242	388.015	-206.868	749.475	396.462	-220.333	759.733	318.838	-199.643	731.836	227.479
556	5.55	3.50188	1130.5	463.577	66.5445	1132.78	503.806	-66.4311	1126.08	501.341	167.193	963.641	582.093	-158.245	970.397	578.629	-0.33434	946.163	544.31	274.223	664.922	603.384	278.82	729.395	376.631	217.618	741.586	388.653	232.18	756.536	302.496	212.769	732.518	216.994	-297.605	703.475	617.451	-271.161	734.247	388.033	-206.872	749.497	396.469	-220.314	759.79	318.876	-199.637	731.838	227.492
557	5.56	3.55006	1130.48	463.592	66.5766	1132.77	503.783	-66.4029	1126.07	501.31	167.219	963.636	582.084	-158.226	970.41	578.628	-0.29831	946.144	544.428	274.24	664.909	603.352	278.84	729.399	376.619	217.631	741.592	388.629	232.205	756.511	302.523	212.801	732.512	216.992	-297.585	703.511	617.427	-271.127	734.248	387.989	-206.829	749.506	396.44	-220.29	759.817	318.865	-199.613	731.834	227.484
558	5.57	3.59038	1130.42	463.663	66.6466	1132.72	503.855	-66.3734	1126.05	501.299	167.253	963.616	582.109	-158.202	970.408	578.65	-0.24939	946.1	544.563	274.258	664.887	603.329	278.885	729.373	376.687	217.668	741.576	388.69	232.235	756.46	302.55	212.844	732.486	217.063	-297.573	703.545	617.481	-271.113	734.248	387.994	-206.806	749.476	396.456	-220.276	759.816	318.874	-199.591	731.822	227.488
559	5.58	3.61458	1130.39	463.64	66.6928	1132.66	503.918	-66.3444	1126.04	501.286	167.288	963.608	582.134	-158.191	970.414	578.64	-0.22714	946.091	544.603	274.282	664.895	603.352	278.908	729.343	376.717	217.703	741.555	388.721	232.237	756.4	302.553	212.873	732.456	217.118	-297.547	703.564	617.533	-271.102	734.245	387.971	-206.779	749.473	396.462	-220.265	759.831	318.838	-199.571	731.829	227.489
560	5.59	3.61609	1130.41	463.555	66.707	1132.65	503.898	-66.3315	1126.05	501.268	167.297	963.631	582.151	-158.187	970.443	578.609	-0.23283	946.16	544.499	274.319	664.897	603.403	278.926	729.346	376.716	217.711	741.569	388.705	232.206	756.43	302.54	212.884	732.469	217.106	-297.498	703.561	617.512	-271.092	734.254	387.967	-206.768	749.505	396.411	-220.269	759.855	318.815	-199.569	731.849	227.477
561	5.6	3.57827	1130.44	463.51	66.6971	1132.67	503.874	-66.3502	1126.04	501.256	167.293	963.641	582.15	-158.201	970.471	578.599	-0.27643	946.244	544.416	274.332	664.885	603.401	278.918	729.354	376.708	217.71	741.568	388.718	232.184	756.496	302.532	212.867	732.474	217.097	-297.5	703.55	617.465	-271.12	734.266	387.964	-206.826	749.534	396.436	-220.292	759.841	318.838	-199.616	731.848	227.496
562	5.61	3.57425	1130.41	463.527	66.681	1132.66	503.839	-66.3734	1126.01	501.265	167.291	963.646	582.137	-158.225	970.48	578.569	-0.30861	946.24	544.445	274.33	664.884	603.384	278.897	729.349	376.699	217.676	741.567	388.707	232.186	756.508	302.51	212.839	732.468	217.079	-297.523	703.557	617.455	-271.142	734.267	387.976	-206.87	749.51	396.454	-220.325	759.795	318.862	-199.639	731.838	227.487
563	5.62	3.60909	1130.36	463.482	66.6547	1132.63	503.765	-66.3595	1125.98	501.241	167.273	963.635	582.12	-158.225	970.486	578.523	-0.30562	946.209	544.487	274.305	664.917	603.404	278.876	729.357	376.691	217.65	741.569	388.685	232.168	756.482	302.496	212.813	732.463	217.041	-297.535	703.585	617.452	-271.138	734.259	387.978	-206.863	749.488	396.454	-220.314	759.759	318.848	-199.631	731.826	227.447
564	5.63	3.60609	1130.37	463.427	66.6129	1132.64	503.718	-66.3562	1125.98	501.222	167.257	963.65	582.122	-158.245	970.516	578.512	-0.31079	946.267	544.42	274.271	664.929	603.387	278.834	729.368	376.657	217.624	741.584	388.671	232.142	756.513	302.491	212.768	732.486	216.988	-297.563	703.603	617.446	-271.15	734.257	387.94	-206.871	749.492	396.485	-220.323	759.762	318.817	-199.634	731.827	227.455
565	5.64	3.58119	1130.41	463.421	66.5941	1132.66	503.725	-66.3735	1126.01	501.216	167.23	963.677	582.127	-158.288	970.559	578.544	-0.31996	946.349	544.429	274.243	664.934	603.378	278.807	729.394	376.64	217.592	741.61	388.696	232.115	756.564	302.472	212.718	732.523	216.936	-297.612	703.641	617.487	-271.185	734.275	387.974	-206.881	749.506	396.474	-220.346	759.771	318.852	-199.668	731.835	227.507
566	5.65	3.59464	1130.4	463.423	66.6243	1132.67	503.731	-66.3519	1126.02	501.211	167.244	963.691	582.119	-158.286	970.597	578.531	-0.29697	946.423	544.384	274.223	664.94	603.367	278.804	729.408	376.604	217.6	741.626	388.674	232.12	756.582	302.467	212.723	732.557	216.927	-297.62	703.695	617.528	-271.174	734.295	387.986	-206.852	749.544	396.435	-220.33	759.798	318.844	-199.656	731.852	227.466
567	5.66	3.66736	1130.38	463.374	66.6839	1132.66	503.724	-66.2979	1126.03	501.173	167.287	963.687	582.081	-158.241	970.614	578.496	-0.21836	946.468	544.285	274.233	664.947	603.378	278.829	729.418	376.559	217.631	741.622	388.63	232.178	756.567	302.464	212.795	732.546	216.96	-297.57	703.721	617.507	-271.131	734.308	387.941	-206.804	749.574	396.353	-220.272	759.828	318.786	-199.604	731.861	227.42
568	5.67	3.72726	1130.37	463.394	66.7425	1132.63	503.784	-66.2672	1126.03	501.167	167.317	963.676	582.083	-158.215	970.616	578.513	-0.17859	946.462	544.319	274.258	664.943	603.398	278.873	729.419	376.594	217.665	741.619	388.638	232.212	756.538	302.484	212.842	732.533	216.999	-297.541	703.729	617.511	-271.103	734.307	387.951	-206.782	749.57	396.358	-220.254	759.863	318.785	-199.586	731.855	227.434
569	5.68	3.71595	1130.35	463.472	66.7833	1132.61	503.839	-66.2677	1126	501.204	167.323	963.666	582.096	-158.216	970.603	578.55	-0.18184	946.438	544.44	274.283	664.942	603.42	278.88	729.383	376.654	217.694	741.582	388.674	232.239	756.509	302.487	212.859	732.495	217.06	-297.531	703.695	617.494	-271.112	734.285	387.963	-206.81	749.516	396.405	-220.271	759.863	318.842	-199.585	731.833	227.451
570	5.69	3.71529	1130.33	463.485	66.7953	1132.57	503.858	-66.2567	1125.99	501.223	167.328	963.63	582.064	-158.224	970.586	578.544	-0.17379	946.411	544.498	274.302	664.95	603.446	278.887	729.348	376.674	217.706	741.552	388.689	232.249	756.481	302.47	212.89	732.443	217.082	-297.512	703.651	617.451	-271.109	734.255	387.95	-206.819	749.482	396.403	-220.273	759.826	318.852	-199.585	731.809	227.433
571	5.7	3.69935	1130.33	463.514	66.7979	1132.53	503.883	-66.2683	1125.96	501.254	167.338	963.617	582.075	-158.241	970.583	578.547	-0.19249	946.382	544.615	274.309	664.957	603.451	278.894	729.334	376.705	217.706	741.539	388.708	232.254	756.439	302.556	212.884	732.427	217.105	-297.527	703.65	617.43	-271.119	734.237	387.986	-206.744	749.414	396.321	-220.417	759.416	318.592	-199.593	731.797	227.468
572	5.71	3.64284	1130.34	463.576	66.7593	1132.56	503.889	-66.3166	1125.98	501.29	167.314	963.647	582.107	-158.29	970.62	578.572	-0.24535	946.415	544.637	274.295	664.961	603.43	278.87	729.35	376.712	217.674	741.558	388.731	232.22	756.454	302.586	212.827	732.464	217.098	-297.577	703.675	617.439	-271.15	734.24	388.026	-206.618	749.293	396.125	-220.737	758.557	318.094	-199.62	731.809	227.526
573	5.72	3.61557	1130.37	463.481	66.6925	1132.61	503.773	-66.3354	1126.02	501.239	167.288	963.686	582.078	-158.32	970.668	578.521	-0.2857	946.495	544.453	274.272	664.973	603.376	278.849	729.382	376.663	217.644	741.594	388.685	232.165	756.51	302.51	212.773	732.512	216.978	-297.612	703.708	617.437	-271.163	734.268	387.987	-206.674	749.358	396.158	-220.668	758.74	318.184	-199.628	731.831	227.475
574	5.73	3.6512	1130.43	463.304	66.6659	1132.67	503.659	-66.3091	1126.04	501.127	167.284	963.719	581.995	-158.312	970.702	578.425	-0.26633	946.586	544.192	274.266	664.992	603.373	278.83	729.417	376.551	217.656	741.631	388.624	232.167	756.565	302.467	212.768	732.546	216.876	-297.62	703.763	617.45	-271.148	734.313	387.925	-206.789	749.523	396.301	-220.352	759.558	318.62	-199.599	731.844	227.403
575	5.74	3.67825	1130.43	463.295	66.6649	1132.69	503.662	-66.2999	1126.06	501.133	167.283	963.757	581.995	-158.301	970.732	578.434	-0.23112	946.606	544.206	274.26	665.02	603.402	278.839	729.442	376.558	217.666	741.644	388.617	232.182	756.592	302.481	212.787	732.555	216.873	-297.633	703.824	617.519	-271.137	734.332	387.954	-206.81	749.572	396.363	-220.271	759.761	318.742	-199.596	731.872	227.413
576	5.75	3.63945	1130.43	463.378	66.6499	1132.69	503.712	-66.3269	1126.06	501.178	167.27	963.788	582.037	-158.324	970.736	578.483	-0.26662	946.602	544.308	274.258	665.026	603.403	278.838	729.448	376.623	217.652	741.648	388.664	232.152	756.609	302.481	212.768	732.56	216.907	-297.643	703.838	617.562	-271.156	734.337	387.969	-206.849	749.574	396.413	-220.295	759.807	318.823	-199.627	731.883	227.444
577	5.76	3.62124	1130.43	463.387	66.6705	1132.66	503.754	-66.3432	1126.05	501.183	167.272	963.806	582.046	-158.333	970.727	578.485	-0.28338	946.613	544.344	274.288	665.026	603.4	278.845	729.436	376.615	217.659	741.64	388.674	232.13	756.604	302.471	212.78	732.554	216.942	-297.618	703.797	617.508	-271.154	734.312	387.931	-206.846	749.562	396.413	-220.297	759.837	318.846	-199.627	731.875	227.449
578	5.77	3.63812	1130.37	463.43	66.708	1132.61	503.822	-66.3462	1125.98	501.198	167.295	963.778	582.03	-158.301	970.688	578.472	-0.23041	946.563	544.43	274.329	665.033	603.419	278.889	729.39	376.634	217.699	741.611	388.659	232.189	756.527	302.497	212.819	732.502	216.994	-297.578	703.729	617.426	-271.136	734.276	387.938	-206.832	749.516	396.431	-220.284	759.828	318.829	-199.593	731.827	227.459
579	5.78	3.63675	1130.29	463.565	66.7039	1132.54	503.87	-66.3508	1125.92	501.258	167.306	963.731	582.025	-158.295	970.642	578.486	-0.23631	946.467	544.607	274.367	665.076	603.469	278.903	729.346	376.665	217.722	741.554	388.676	232.261	756.443	302.517	212.844	732.45	217.052	-297.587	703.696	617.4	-271.127	734.233	387.981	-206.87	749.439	396.5	-220.305	759.764	318.858	-199.586	731.773	227.487
580	5.79	3.60589	1130.27	463.63	66.6639	1132.53	503.853	-66.3808	1125.92	501.28	167.294	963.726	582.02	-158.327	970.638	578.5	-0.27974	946.432	544.696	274.392	665.135	603.552	278.887	729.322	376.664	217.708	741.527	388.668	232.26	756.431	302.518	212.837	732.427	217.059	-297.605	703.655	617.352	-271.132	734.209	387.984	-206.908	749.407	396.517	-220.321	759.759	318.863	-199.595	731.753	227.471
581	5.8	3.5743	1130.29	463.631	66.6261	1132.57	503.814	-66.416	1125.93	501.286	167.277	963.765	582.035	-158.367	970.661	578.513	-0.31306	946.473	544.609	274.378	665.15	603.551	278.866	729.328	376.644	217.673	741.537	388.631	232.223	756.463	302.523	212.817	732.43	217.047	-297.615	703.655	617.341	-271.145	734.207	387.967	-206.9	749.419	396.481	-220.311	759.779	318.835	-199.599	731.762	227.449
582	5.81	3.50473	1130.31	463.65	66.5724	1132.59	503.794	-66.4501	1125.94	501.315	167.239	963.812	582.041	-158.412	970.68	578.522	-0.34959	946.511	544.569	274.365	665.167	603.49	278.851	729.364	376.611	217.639	741.555	388.607	232.182	756.484	302.485	212.781	732.471	216.99	-297.64	703.707	617.409	-271.169	734.226	387.965	-206.825	749.39	396.356	-220.455	759.396	318.597	-199.614	731.786	227.45
583	5.82	3.4639	1130.34	463.631	66.5325	1132.65	503.765	-66.4843	1125.95	501.344	167.214	963.857	582.045	-158.447	970.72	578.532	-0.34212	946.571	544.552	274.352	665.198	603.493	278.838	729.41	376.597	217.633	741.592	388.611	232.152	756.528	302.482	212.751	732.512	216.954	-297.667	703.776	617.495	-271.179	734.247	387.99	-206.66	749.3	396.049	-220.74	758.547	318.018	-199.625	731.819	227.444
584	5.83	3.44788	1130.41	463.533	66.4985	1132.71	503.706	-66.4863	1125.99	501.306	167.213	963.898	582.023	-158.45	970.765	578.526	-0.31515	946.683	544.394	274.337	665.247	603.524	278.852	729.455	376.561	217.662	741.64	388.612	232.167	756.57	302.484	212.745	732.549	216.9	-297.667	703.824	617.549	-271.152	734.281	387.974	-206.58	749.319	395.909	-220.756	758.354	317.836	-199.62	731.851	227.406
585	5.84	3.44402	1130.49	463.441	66.499	1132.76	503.692	-66.4887	1126.04	501.279	167.233	963.936	582.006	-158.458	970.798	578.519	-0.29887	946.787	544.28	274.347	665.275	603.541	278.87	729.473	376.555	217.69	741.679	388.582	232.186	756.613	302.457	212.767	732.577	216.879	-297.647	703.834	617.544	-271.141	734.334	387.925	-206.515	749.341	395.876	-220.734	758.328	317.757	-199.591	731.886	227.402
586	5.85	3.436	1130.52	463.446	66.4909	1132.76	503.727	-66.5034	1126.06	501.312	167.248	963.955	582.047	-158.468	970.809	578.538	-0.31495	946.824	544.295	274.387	665.261	603.547	278.863	729.469	376.576	217.706	741.685	388.601	232.184	756.613	302.406	212.786	732.565	216.905	-297.644	703.812	617.532	-271.137	734.353	387.917	-206.587	749.398	396.015	-220.619	758.71	318.046	-199.597	731.89	227.423
587	5.86	3.42611	1130.51	463.517	66.4829	1132.72	503.767	-66.5237	1126.04	501.37	167.25	963.949	582.076	-158.463	970.797	578.539	-0.3211	946.776	544.419	274.411	665.254	603.544	278.878	729.444	376.624	217.742	741.668	388.676	232.178	756.586	302.437	212.803	732.532	216.967	-297.632	703.765	617.482	-271.145	734.321	387.953	-206.777	749.514	396.305	-220.358	759.547	318.642	-199.602	731.873	227.45
588	5.87	3.39248	1130.45	463.631	66.4647	1132.69	503.793	-66.5425	1125.99	501.405	167.233	963.931	582.09	-158.472	970.772	578.554	-0.33167	946.711	544.535	274.429	665.255	603.564	278.9	729.412	376.657	217.736	741.646	388.699	232.186	756.542	302.503	212.828	732.494	217.05	-297.617	703.688	617.38	-271.149	734.275	387.985	-206.85	749.52	396.405	-220.319	759.742	318.796	-199.612	731.842	227.464
589	5.88	3.34951	1130.41	463.741	66.4465	1132.69	503.829	-66.5676	1125.95	501.452	167.213	963.912	582.101	-158.495	970.743	578.598	-0.37833	946.664	544.608	274.435	665.269	603.574	278.901	729.372	376.678	217.702	741.611	388.697	232.178	756.504	302.503	212.812	732.457	217.067	-297.61	703.659	617.341	-271.165	734.245	387.993	-206.878	749.487	396.441	-220.334	759.782	318.868	-199.619	731.81	227.467
590	5.89	3.33694	1130.37	463.842	66.4411	1132.66	503.87	-66.5744	1125.94	501.478	167.219	963.902	582.075	-158.507	970.735	578.622	-0.38367	946.646	544.689	274.43	665.292	603.572	278.889	729.344	376.645	217.697	741.548	388.659	232.212	756.456	302.481	212.826	732.432	217.045	-297.61	703.675	617.371	-271.147	734.213	387.972	-206.86	749.428	396.424	-220.328	759.778	318.902	-199.593	731.777	227.46
591	5.9	3.36325	1130.34	463.873	66.4428	1132.64	503.851	-66.555	1125.93	501.483	167.238	963.894	582.058	-158.51	970.743	578.637	-0.33671	946.636	544.72	274.405	665.308	603.56	278.9	729.35	376.642	217.733	741.506	388.646	232.264	756.4	302.506	212.853	732.415	217.046	-297.616	703.72	617.416	-271.109	734.196	387.937	-206.81	749.399	396.422	-220.295	759.796	318.846	-199.549	731.764	227.461
592	5.91	3.35394	1130.37	463.84	66.4259	1132.68	503.845	-66.5628	1125.96	501.473	167.219	963.932	582.052	-158.521	970.775	578.622	-0.33643	946.702	544.635	274.382	665.363	603.596	278.878	729.383	376.6	217.716	741.548	388.605	232.26	756.392	302.51	212.834	732.454	217.032	-297.632	703.762	617.461	-271.111	734.216	387.928	-206.808	749.448	396.416	-220.293	759.83	318.818	-199.554	731.792	227.454
593	5.92	3.28745	1130.45	463.788	66.3736	1132.75	503.829	-66.6085	1125.99	501.495	167.162	963.987	582.05	-158.578	970.813	578.627	-0.40274	946.782	544.539	274.372	665.398	603.617	278.829	729.411	376.565	217.662	741.619	388.566	232.197	756.479	302.459	212.797	732.504	216.989	-297.649	703.763	617.505	-271.139	734.246	387.964	-206.785	749.449	396.269	-220.429	759.459	318.604	-199.604	731.823	227.456
594	5.93	3.24152	1130.51	463.729	66.3208	1132.78	503.77	-66.6574	1126.04	501.505	167.138	964.001	582.019	-158.619	970.835	578.613	-0.42738	946.838	544.456	274.368	665.405	603.606	278.824	729.436	376.546	217.658	741.654	388.604	232.168	756.543	302.453	212.752	732.521	216.922	-297.65	703.754	617.501	-271.168	734.269	387.997	-206.708	749.399	396.132	-220.586	758.965	318.298	-199.628	731.841	227.472
595	5.94	3.22249	1130.52	463.708	66.3129	1132.78	503.777	-66.6762	1126.05	501.468	167.13	964.023	581.989	-158.629	970.855	578.586	-0.43847	946.888	544.389	274.385	665.428	603.626	278.83	729.45	376.54	217.655	741.663	388.606	232.15	756.592	302.441	212.744	732.527	216.897	-297.648	703.735	617.456	-271.188	734.292	387.959	-206.853	749.502	396.359	-220.38	759.587	318.682	-199.632	731.844	227.442
596	5.95	3.17514	1130.57	463.697	66.2853	1132.8	503.804	-66.703	1126.06	501.495	167.112	964.044	582.01	-158.653	970.88	578.581	-0.46971	946.905	544.425	274.408	665.499	603.716	278.829	729.465	376.572	217.634	741.677	388.581	232.103	756.621	302.454	212.739	732.532	216.906	-297.646	703.729	617.449	-271.206	734.322	387.969	-206.826	749.481	396.314	-220.475	759.352	318.545	-199.648	731.868	227.445
597	5.96	3.13693	1130.6	463.715	66.28	1132.82	503.815	-66.7273	1126.08	501.529	167.104	964.052	582.027	-158.683	970.906	578.6	-0.49843	946.921	544.463	274.423	665.505	603.74	278.818	729.474	376.598	217.636	741.685	388.598	232.098	756.654	302.471	212.732	732.53	216.941	-297.64	703.746	617.489	-271.217	734.341	387.986	-206.676	749.375	396.076	-220.761	758.542	318.059	-199.669	731.881	227.492
598	5.97	3.17853	1130.6	463.687	66.3084	1132.83	503.803	-66.708	1126.08	501.52	167.132	964.055	581.992	-158.658	970.919	578.593	-0.46461	946.93	544.424	274.419	665.474	603.692	278.847	729.458	376.585	217.67	741.68	388.557	232.137	756.639	302.44	212.762	732.543	216.912	-297.619	703.76	617.457	-271.178	734.314	387.945	-206.69	749.404	396.076	-220.66	758.739	318.155	-199.632	731.873	227.462
599	5.98	3.25123	1130.54	463.749	66.3505	1132.82	503.831	-66.6524	1126.05	501.498	167.163	964.047	581.979	-158.61	970.898	578.587	-0.40761	946.89	544.439	274.409	665.475	603.68	278.895	729.445	376.603	217.721	741.656	388.547	232.205	756.543	302.416	212.83	732.514	216.932	-297.624	703.793	617.468	-271.132	734.269	387.942	-206.8	749.508	396.289	-220.346	759.572	318.638	-199.566	731.836	227.417
600	5.99	3.2759	1130.47	463.874	66.3738	1132.78	503.911	-66.6319	1126.01	501.532	167.17	964.033	581.981	-158.604	970.873	578.617	-0.38229	946.803	544.591	274.4	665.51	603.693	278.907	729.435	376.621	217.751	741.594	388.604	232.264	756.442	302.461	212.855	732.47	217.004	-297.666	703.825	617.479	-271.107	734.232	387.944	-206.744	749.437	396.279	-220.406	759.387	318.504	-199.544	731.802	227.405
601	6	3.25906	1130.44	463.952	66.3544	1132.77	503.928	-66.6529	1125.99	501.563	167.152	964.032	581.983	-158.633	970.868	578.643	-0.39753	946.752	544.678	274.394	665.541	603.701	278.894	729.427	376.59	217.749	741.553	388.635	232.275	756.412	302.494	212.839	732.464	217.048	-297.704	703.853	617.492	-271.108	734.216	387.924	-206.579	749.268	396.055	-220.675	758.557	318.017	-199.555	731.783	227.429
602	6.01	3.22933	1130.41	463.994	66.3291	1132.75	503.903	-66.6776	1125.97	501.572	167.136	964.046	582.002	-158.661	970.874	578.652	-0.43004	946.752	544.666	274.399	665.546	603.669	278.879	729.411	376.571	217.723	741.553	388.635	232.238	756.394	302.483	212.815	732.455	217.038	-297.734	703.849	617.456	-271.13	734.21	387.94	-206.558	749.2	396.028	-220.769	758.339	317.908	-199.584	731.779	227.475
603	6.02	3.18971	1130.4	464.006	66.2974	1132.75	503.874	-66.5468	1125.92	501.674	167.121	964.059	581.996	-158.684	970.883	578.656	-0.46882	946.75	544.654	274.416	665.575	603.683	278.853	729.408	376.594	217.69	741.572	388.62	232.202	756.411	302.473	212.789	732.458	217.024	-297.765	703.84	617.407	-271.149	734.203	387.961	-206.675	749.252	396.168	-220.697	758.647	318.138	-199.604	731.769	227.5
604	6.03	3.15544	1130.42	463.901	66.2582	1132.76	503.838	-66.3772	1125.9	501.77	167.096	964.079	581.982	-158.714	970.911	578.633	-0.48359	946.807	544.581	274.421	665.603	603.72	278.84	729.424	376.604	217.677	741.624	388.632	232.189	756.491	302.482	212.766	732.473	216.999	-297.787	703.848	617.396	-271.17	734.233	387.965	-206.796	749.375	396.273	-220.565	759.123	318.447	-199.613	731.79	227.508
605	6.04	3.12603	1130.54	463.674	66.2424	1132.79	503.779	-66.6628	1126	501.574	167.101	964.129	581.935	-158.725	970.971	578.588	-0.49702	946.971	544.35	274.428	665.586	603.681	278.832	729.468	376.571	217.685	741.684	388.62	232.165	756.609	302.443	212.731	732.52	216.916	-297.799	703.879	617.407	-271.194	734.316	387.909	-206.641	749.353	395.97	-220.726	758.497	318.026	-199.623	731.84	227.467
606	6.05	3.12421	1130.64	463.463	66.249	1132.8	503.716	-66.7348	1126.06	501.453	167.11	964.165	581.876	-158.714	971.019	578.542	-0.49056	947.112	544.171	274.453	665.561	603.633	278.822	729.505	376.492	217.695	741.711	388.553	232.163	756.655	302.414	212.725	732.562	216.809	-297.779	703.889	617.413	-271.188	734.374	387.84	-206.664	749.432	396	-220.604	758.738	318.122	-199.617	731.869	227.408
607	6.06	3.13432	1130.63	463.473	66.2691	1132.78	503.727	-66.5866	1126.03	501.521	167.11	964.175	581.882	-158.701	971.033	578.529	-0.47256	947.132	544.178	274.476	665.565	603.647	278.845	729.5	376.498	217.708	741.717	388.538	232.153	756.648	302.397	212.758	732.553	216.819	-297.753	703.908	617.451	-271.176	734.391	387.876	-206.755	749.516	396.155	-220.454	759.19	318.379	-199.605	731.877	227.413
608	6.07	3.14308	1130.54	463.633	66.2632	1132.76	503.79	-66.392	1125.98	501.683	167.118	964.174	581.951	-158.702	971.015	578.546	-0.46341	947.071	544.303	274.482	665.607	603.714	278.868	729.468	376.565	217.715	741.709	388.607	232.121	756.622	302.432	212.796	732.52	216.939	-297.742	703.929	617.462	-271.176	734.364	387.931	-206.61	749.411	395.975	-220.679	758.543	317.982	-199.601	731.885	227.439
609	6.08	3.12738	1130.46	463.779	66.2605	1132.74	503.817	-66.6523	1125.96	501.593	167.114	964.159	581.989	-158.7	970.988	578.586	-0.46486	947.028	544.373	274.499	665.626	603.739	278.883	729.442	376.621	217.703	741.676	388.602	232.117	756.537	302.474	212.8	732.496	216.984	-297.739	703.941	617.464	-271.16	734.317	387.951	-206.654	749.43	396.065	-220.625	758.773	318.125	-199.597	731.868	227.458
610	6.09	3.13619	1130.39	463.92	66.2861	1132.7	503.858	-66.7071	1125.92	501.58	167.138	964.13	581.977	-158.69	970.961	578.603	-0.45728	946.945	544.492	274.506	665.64	603.735	278.896	729.413	376.595	217.706	741.612	388.557	232.157	756.431	302.441	212.798	732.477	216.97	-297.742	703.938	617.451	-271.15	734.27	387.966	-206.808	749.482	396.339	-220.371	759.584	318.659	-199.575	731.816	227.446
611	6.1	3.18337	1130.3	464.031	66.3219	1132.63	503.906	-66.696	1125.86	501.59	167.173	964.102	581.958	-158.667	970.942	578.624	-0.43126	946.827	544.679	274.51	665.705	603.769	278.9	729.396	376.594	217.782	741.522	388.636	232.229	756.34	302.442	212.827	732.438	217.006	-297.746	703.943	617.466	-271.121	734.224	387.977	-206.731	749.368	396.302	-220.414	759.397	318.527	-199.538	731.749	227.468
612	6.11	3.20458	1130.25	464.061	66.3214	1132.61	503.897	-66.5278	1125.81	501.675	167.199	964.087	581.948	-158.664	970.932	578.65	-0.42219	946.798	544.682	274.506	665.791	603.844	278.897	729.399	376.591	217.79	741.494	388.638	232.264	756.345	302.461	212.827	732.418	217.029	-297.754	703.954	617.48	-271.101	734.209	387.948	-206.555	749.214	396.042	-220.665	758.544	317.956	-199.521	731.721	227.478
613	6.12	3.14763	1130.3	463.996	66.2653	1132.63	503.826	-66.3749	1125.81	501.765	167.168	964.122	581.936	-158.706	970.954	578.649	-0.47729	946.845	544.61	274.491	665.79	603.84	278.861	729.418	376.564	217.712	741.569	388.577	232.224	756.433	302.44	212.772	732.458	216.97	-297.787	703.934	617.449	-271.123	734.221	387.945	-206.64	749.279	396.1	-220.627	758.717	318.074	-199.575	731.757	227.449
614	6.13	3.09034	1130.38	463.908	66.2097	1132.68	503.766	-66.6821	1125.9	501.622	167.119	964.169	581.93	-158.754	971.004	578.622	-0.52088	946.949	544.538	274.501	665.77	603.787	278.827	729.453	376.533	217.669	741.658	388.552	232.158	756.557	302.405	212.713	732.508	216.902	-297.787	703.928	617.448	-271.177	734.271	387.969	-206.79	749.403	396.254	-220.524	759.167	318.444	-199.633	731.802	227.448
615	6.14	3.08167	1130.48	463.758	66.2114	1132.7	503.749	-66.7549	1125.96	501.557	167.135	964.219	581.921	-158.758	971.052	578.596	-0.5235	947.074	544.388	274.526	665.807	603.811	278.821	729.492	376.489	217.674	741.705	388.539	232.113	756.638	302.349	212.69	732.543	216.829	-297.768	703.939	617.434	-271.196	734.317	387.936	-206.751	749.397	396.181	-220.602	758.877	318.262	-199.641	731.85	227.42
616	6.15	3.11399	1130.55	463.596	66.2282	1132.73	503.748	-66.7481	1126.01	501.509	167.16	964.244	581.907	-158.736	971.09	578.581	-0.50189	947.199	544.211	274.534	665.848	603.878	278.821	729.52	376.47	217.687	741.728	388.514	232.103	756.666	302.364	212.708	732.55	216.786	-297.722	703.96	617.436	-271.178	734.361	387.885	-206.869	749.548	396.329	-220.349	759.596	318.67	-199.625	731.87	227.385
617	6.16	3.11759	1130.6	463.545	66.2481	1132.75	503.768	-66.7404	1126.02	501.527	167.165	964.26	581.898	-158.72	971.119	578.589	-0.47606	947.274	544.143	274.531	665.829	603.852	278.84	729.534	376.504	217.707	741.747	388.55	232.091	756.688	302.342	212.731	732.568	216.824	-297.716	703.992	617.477	-271.175	734.395	387.887	-206.781	749.559	396.228	-220.396	759.424	318.523	-199.612	731.893	227.388
618	6.17	3.13491	1130.58	463.661	66.2698	1132.76	503.793	-66.7168	1126.02	501.554	167.19	964.273	581.92	-158.701	971.142	578.622	-0.46345	947.232	544.192	274.568	665.808	603.814	278.87	729.537	376.515	217.732	741.752	388.57	232.116	756.676	302.34	212.746	732.578	216.854	-297.73	704.034	617.528	-271.153	734.38	387.932	-206.68	749.493	396.104	-220.532	758.999	318.256	-199.603	731.9	227.446
619	6.18	3.18273	1130.47	463.818	66.2935	1132.74	503.822	-66.6807	1125.97	501.564	167.242	964.245	581.968	-158.671	971.124	578.647	-0.42083	947.112	544.296	274.601	665.831	603.842	278.91	729.493	376.544	217.768	741.706	388.609	232.178	756.54	302.402	212.781	732.543	216.879	-297.722	704.055	617.527	-271.116	734.327	387.934	-206.716	749.503	396.195	-220.429	759.277	318.418	-199.566	731.867	227.446
620	6.19	3.20957	1130.37	463.977	66.3362	1132.69	503.91	-66.6551	1125.91	501.631	167.263	964.209	581.987	-158.657	971.085	578.654	-0.3625	946.985	544.503	274.612	665.87	603.876	278.922	729.454	376.57	217.813	741.616	388.663	232.241	756.418	302.47	212.81	732.494	216.954	-297.734	704.058	617.499	-271.103	734.284	387.941	-206.547	749.316	396.021	-220.674	758.572	317.947	-199.533	731.814	227.433
621	6.2	3.21265	1130.33	464.152	66.3519	1132.68	503.997	-66.6572	1125.89	501.718	167.275	964.184	581.994	-158.657	971.073	578.698	-0.35707	946.937	544.64	274.598	665.874	603.847	278.911	729.43	376.599	217.825	741.559	388.658	232.28	756.363	302.506	212.82	732.466	217.03	-297.774	704.102	617.548	-271.112	734.248	387.943	-206.517	749.251	396.005	-220.772	758.388	317.885	-199.543	731.782	227.478
622	6.21	3.19841	1130.33	464.172	66.3368	1132.7	503.979	-66.6732	1125.88	501.759	167.283	964.192	581.999	-158.664	971.088	578.696	-0.37934	946.91	544.656	274.594	665.834	603.791	278.899	729.417	376.576	217.793	741.554	388.611	232.276	756.366	302.478	212.806	732.452	217.008	-297.808	704.115	617.541	-271.126	734.242	387.943	-206.534	749.234	395.976	-220.781	758.324	317.875	-199.56	731.761	227.491
623	6.22	3.19788	1130.34	464.062	66.3296	1132.7	503.923	-66.6719	1125.9	501.718	167.276	964.196	581.962	-158.663	971.097	578.642	-0.38613	946.932	544.487	274.618	665.817	603.805	278.895	729.398	376.553	217.758	741.587	388.558	232.273	756.405	302.477	212.775	732.441	216.945	-297.807	704.102	617.505	-271.119	734.252	387.941	-206.543	749.256	395.921	-220.752	758.281	317.813	-199.559	731.765	227.437
624	6.23	3.19056	1130.4	463.936	66.3156	1132.71	503.925	-66.6873	1125.94	501.715	167.261	964.196	581.962	-158.675	971.122	578.61	-0.41141	947.009	544.378	274.637	665.803	603.827	278.88	729.401	376.576	217.734	741.632	388.57	232.226	756.465	302.462	212.755	732.457	216.929	-297.811	704.099	617.484	-271.137	734.285	387.945	-206.651	749.343	396.04	-220.642	758.652	318.062	-199.576	731.789	227.431
625	6.24	3.14317	1130.54	463.782	66.2924	1132.75	503.897	-66.719	1126.02	501.689	167.229	964.247	581.957	-158.702	971.177	578.59	-0.47036	947.151	544.287	274.661	665.809	603.808	278.848	729.444	376.555	217.723	741.686	388.602	232.129	756.594	302.408	212.712	732.513	216.892	-297.81	704.132	617.493	-271.185	734.347	387.925	-206.811	749.469	396.225	-220.517	759.155	318.419	-199.615	731.84	227.433
626	6.25	3.11563	1130.67	463.596	66.3099	1132.78	503.867	-66.7151	1126.08	501.638	167.229	964.293	581.918	-158.71	971.223	578.559	-0.49524	947.302	544.078	274.701	665.832	603.809	278.832	729.496	376.488	217.722	741.733	388.567	232.06	756.67	302.346	212.693	732.549	216.847	-297.79	704.156	617.454	-271.194	734.405	387.885	-206.684	749.411	395.989	-220.716	758.517	317.981	-199.621	731.877	227.428
627	6.26	3.17834	1130.67	463.58	66.3686	1132.78	503.857	-66.6595	1126.11	501.577	167.267	964.303	581.885	-158.676	971.234	578.537	-0.4369	947.348	543.981	274.714	665.828	603.81	278.877	729.497	376.505	217.754	741.738	388.559	232.072	756.651	302.325	212.723	732.552	216.825	-297.782	704.21	617.495	-271.161	734.419	387.87	-206.58	749.412	395.886	-220.727	758.363	317.843	-199.588	731.889	227.415
628	6.27	3.25639	1130.58	463.699	66.4132	1132.77	503.932	-66.6245	1126.08	501.571	167.301	964.285	581.895	-158.638	971.223	578.541	-0.36968	947.282	544.059	274.691	665.843	603.822	278.912	729.475	376.547	217.795	741.721	388.592	232.141	756.597	302.397	212.76	732.529	216.885	-297.795	704.23	617.488	-271.143	734.391	387.88	-206.614	749.454	395.997	-220.602	758.719	318.046	-199.564	731.877	227.415
629	6.28	3.29278	1130.52	463.813	66.4317	1132.75	503.96	-66.6024	1126.04	501.612	167.313	964.264	581.882	-158.628	971.21	578.564	-0.35252	947.181	544.204	274.671	665.863	603.824	278.918	729.45	376.587	217.794	741.697	388.59	232.186	756.53	302.452	212.782	732.503	216.939	-297.82	704.258	617.504	-271.136	734.353	387.919	-206.731	749.502	396.217	-220.465	759.214	318.357	-199.554	731.851	227.442
630	6.29	3.3173	1130.45	463.885	66.4512	1132.73	503.958	-66.5686	1126	501.614	167.32	964.258	581.86	-158.617	971.196	578.576	-0.34108	947.106	544.261	274.675	665.896	603.81	278.922	729.438	376.567	217.793	741.652	388.556	232.207	756.477	302.391	212.786	732.49	216.907	-297.853	704.277	617.504	-271.118	734.311	387.871	-206.646	749.423	396.098	-220.536	758.944	318.174	-199.53	731.814	227.411
631	6.3	3.36797	1130.37	463.989	66.4754	1132.69	503.969	-66.5284	1125.96	501.605	167.347	964.25	581.86	-158.596	971.18	578.568	-0.31812	947.03	544.353	274.671	665.921	603.783	278.923	729.421	376.541	217.81	741.598	388.546	232.249	756.435	302.416	212.786	732.472	216.901	-297.869	704.283	617.447	-271.097	734.279	387.858	-206.67	749.402	396.184	-220.434	759.233	318.402	-199.507	731.768	227.399
632	6.31	3.37242	1130.32	464.098	66.501	1132.65	504.005	-66.5321	1125.92	501.633	167.351	964.228	581.879	-158.601	971.169	578.565	-0.31896	946.974	544.48	274.667	665.95	603.83	278.922	729.407	376.568	217.819	741.564	388.603	232.254	756.405	302.443	212.788	732.455	216.957	-297.895	704.282	617.418	-271.105	734.262	387.89	-206.548	749.254	396.05	-220.665	758.503	317.973	-199.518	731.74	227.434
633	6.32	3.33543	1130.36	464.017	66.467	1132.68	503.951	-66.565	1125.93	501.656	167.321	964.24	581.871	-158.631	971.213	578.572	-0.34411	947.038	544.461	274.672	665.947	603.856	278.908	729.425	376.57	217.796	741.61	388.621	232.212	756.467	302.421	212.764	732.461	216.951	-297.907	704.269	617.402	-271.136	734.275	387.904	-206.57	749.269	396.001	-220.751	758.333	317.85	-199.556	731.773	227.434
634	6.33	3.30297	1130.45	463.816	66.4389	1132.71	503.87	-66.5904	1125.97	501.616	167.293	964.271	581.841	-158.667	971.269	578.54	-0.37373	947.176	544.265	274.699	665.91	603.833	278.867	729.465	376.493	217.754	741.683	388.547	232.135	756.562	302.342	212.717	732.505	216.843	-297.875	704.264	617.397	-271.175	734.332	387.913	-206.588	749.347	395.925	-220.766	758.301	317.832	-199.59	731.817	227.408
635	6.34	3.28428	1130.49	463.706	66.4381	1132.72	503.844	-66.5951	1126.01	501.54	167.294	964.292	581.827	-158.678	971.298	578.517	-0.39535	947.301	544.093	274.715	665.892	603.832	278.859	729.487	376.46	217.744	741.725	388.514	232.102	756.621	302.322	212.692	732.529	216.798	-297.865	704.278	617.427	-271.201	734.386	387.904	-206.669	749.438	396.027	-220.641	758.676	318.076	-199.601	731.843	227.396
636	6.35	3.28479	1130.5	463.668	66.4273	1132.72	503.82	-66.5913	1126.03	501.543	167.314	964.309	581.848	-158.673	971.312	578.521	-0.39741	947.361	544.02	274.725	665.928	603.873	278.875	729.507	376.491	217.752	741.733	388.537	232.089	756.645	302.356	212.704	732.542	216.802	-297.853	704.315	617.483	-271.198	734.409	387.895	-206.857	749.582	396.323	-220.373	759.536	318.641	-199.588	731.853	227.404
637	6.36	3.2808	1130.5	463.655	66.4285	1132.71	503.802	-66.5794	1126.01	501.551	167.317	964.323	581.853	-158.671	971.32	578.5	-0.39264	947.353	544.023	274.72	665.952	603.897	278.88	729.499	376.514	217.759	741.738	388.553	232.095	756.636	302.396	212.714	732.539	216.839	-297.837	704.336	617.471	-271.198	734.416	387.919	-206.832	749.571	396.263	-220.427	759.387	318.488	-199.583	731.864	227.401
638	6.37	3.29345	1130.47	463.686	66.4385	1132.7	503.805	-66.5686	1125.99	501.539	167.328	964.332	581.847	-158.656	971.309	578.464	-0.38719	947.302	544.061	274.712	665.944	603.854	278.897	729.474	376.513	217.762	741.725	388.554	232.111	756.59	302.401	212.727	732.526	216.877	-297.842	704.322	617.43	-271.178	734.39	387.898	-206.721	749.497	396.079	-220.564	758.977	318.166	-199.577	731.857	227.391
639	6.38	3.34464	1130.4	463.723	66.4571	1132.67	503.818	-66.5506	1125.96	501.567	167.349	964.303	581.835	-158.638	971.296	578.482	-0.36379	947.219	544.158	274.706	665.94	603.835	278.922	729.446	376.546	217.777	741.688	388.535	232.181	756.512	302.387	212.75	732.504	216.896	-297.872	704.339	617.43	-271.142	734.341	387.88	-206.735	749.513	396.163	-220.463	759.256	318.347	-199.549	731.835	227.403
640	6.39	3.39007	1130.34	463.791	66.4763	1132.64	503.836	-66.5332	1125.93	501.581	167.362	964.283	581.825	-158.635	971.281	578.495	-0.31995	947.162	544.218	274.697	665.93	603.823	278.935	729.422	376.533	217.808	741.644	388.551	232.219	756.424	302.405	212.766	732.476	216.898	-297.896	704.352	617.435	-271.119	734.308	387.857	-206.573	749.36	395.943	-220.654	758.537	317.875	-199.529	731.798	227.393
641	6.4	3.39108	1130.32	463.785	66.4832	1132.62	503.833	-66.5263	1125.92	501.546	167.365	964.286	581.809	-158.636	971.276	578.479	-0.31852	947.181	544.183	274.68	665.938	603.82	278.928	729.414	376.505	217.812	741.631	388.575	232.22	756.416	302.408	212.771	732.474	216.907	-297.909	704.37	617.424	-271.122	734.306	387.841	-206.62	749.387	395.989	-220.593	758.746	317.999	-199.523	731.793	227.353
642	6.41	3.34797	1130.34	463.79	66.4651	1132.63	503.821	-66.544	1125.93	501.557	167.349	964.292	581.797	-158.659	971.294	578.485	-0.35629	947.209	544.163	274.694	665.956	603.843	278.914	729.417	376.504	217.792	741.656	388.579	232.199	756.457	302.365	212.757	732.487	216.909	-297.919	704.372	617.428	-271.139	734.32	387.847	-206.75	749.472	396.141	-220.469	759.193	318.321	-199.547	731.805	227.397
643	6.42	3.31921	1130.35	463.815	66.4432	1132.63	503.809	-66.5624	1125.93	501.573	167.329	964.295	581.788	-158.679	971.301	578.507	-0.37327	947.205	544.211	274.703	665.93	603.814	278.915	729.419	376.529	217.787	741.67	388.595	232.173	756.499	302.342	212.754	732.476	216.91	-297.919	704.356	617.41	-271.163	734.321	387.874	-206.72	749.437	396.075	-220.565	758.902	318.18	-199.563	731.808	227.426
644	6.43	3.31562	1130.35	463.797	66.451	1132.62	503.817	-66.5786	1125.93	501.54	167.323	964.301	581.78	-158.673	971.307	578.49	-0.35343	947.201	544.202	274.705	665.944	603.821	278.917	729.43	376.543	217.795	741.673	388.578	232.157	756.51	302.357	212.763	732.457	216.918	-297.919	704.343	617.389	-271.163	734.322	387.865	-206.765	749.485	396.165	-220.472	759.2	318.4	-199.571	731.808	227.398
645	6.44	3.31804	1130.36	463.757	66.4462	1132.63	503.796	-66.5807	1125.95	501.515	167.322	964.319	581.793	-158.671	971.32	578.468	-0.35047	947.244	544.172	274.719	665.976	603.858	278.908	729.433	376.528	217.799	741.687	388.579	232.144	756.524	302.36	212.757	732.474	216.905	-297.926	704.338	617.374	-271.141	734.346	387.824	-206.613	749.381	395.996	-220.665	758.521	317.937	-199.567	731.826	227.366
646	6.45	3.29232	1130.4	463.728	66.4192	1132.65	503.779	-66.5962	1125.96	501.535	167.31	964.347	581.794	-158.693	971.342	578.448	-0.38735	947.305	544.133	274.72	665.985	603.847	278.903	729.454	376.524	217.793	741.715	388.599	232.148	756.59	302.332	212.739	732.499	216.884	-297.95	704.353	617.392	-271.157	734.377	387.864	-206.603	749.377	395.969	-220.71	758.361	317.83	-199.574	731.855	227.387
647	6.46	3.2549	1130.39	463.737	66.3948	1132.66	503.74	-66.6312	1125.96	501.536	167.296	964.353	581.755	-158.714	971.351	578.441	-0.41152	947.315	544.077	274.718	665.99	603.835	278.877	729.466	376.473	217.774	741.722	388.547	232.122	756.611	302.291	212.706	732.51	216.855	-297.965	704.363	617.422	-271.191	734.386	387.865	-206.606	749.384	395.947	-220.726	758.302	317.792	-199.581	731.852	227.384
648	6.47	3.23954	1130.36	463.727	66.3752	1132.67	503.71	-66.6383	1125.96	501.537	167.284	964.349	581.734	-158.719	971.342	578.441	-0.41433	947.307	544.04	274.711	666.032	603.869	278.872	729.471	376.447	217.771	741.701	388.517	232.109	756.554	302.29	212.706	732.499	216.825	-297.968	704.365	617.419	-271.186	734.359	387.843	-206.608	749.37	395.884	-220.741	758.279	317.761	-199.573	731.84	227.359
649	6.48	3.21829	1130.34	463.753	66.3504	1132.66	503.732	-66.6476	1125.92	501.573	167.272	964.357	581.776	-158.725	971.325	578.476	-0.43852	947.269	544.109	274.721	666.099	603.931	278.873	729.454	376.486	217.76	741.697	388.533	232.133	756.541	302.369	212.693	732.505	216.831	-297.976	704.364	617.426	-271.177	734.344	387.869	-206.63	749.356	395.907	-220.782	758.287	317.768	-199.569	731.817	227.382
650	6.49	3.18654	1130.34	463.822	66.3308	1132.67	503.772	-66.6721	1125.91	501.619	167.269	964.376	581.802	-158.734	971.315	578.485	-0.45362	947.255	544.176	274.727	666.109	603.906	278.875	729.453	376.493	217.739	741.699	388.551	232.132	756.539	302.41	212.681	732.505	216.871	-297.978	704.384	617.43	-271.193	734.346	387.89	-206.723	749.415	396.05	-220.692	758.693	318.068	-199.583	731.816	227.437
651	6.5	3.18807	1130.34	463.843	66.327	1132.68	503.774	-66.6667	1125.92	501.589	167.284	964.375	581.782	-158.718	971.305	578.46	-0.42987	947.229	544.176	274.741	666.107	603.895	278.882	729.453	376.463	217.756	741.685	388.521	232.134	756.497	302.351	212.714	732.5	216.885	-297.969	704.376	617.4	-271.167	734.338	387.861	-206.851	749.554	396.255	-220.388	759.556	318.609	-199.555	731.814	227.414
652	6.51	3.21621	1130.3	463.846	66.3436	1132.67	503.786	-66.6462	1125.9	501.557	167.311	964.367	581.761	-158.69	971.292	578.468	-0.37328	947.203	544.138	274.747	666.13	603.917	278.908	729.441	376.477	217.79	741.665	388.508	232.191	756.431	302.376	212.769	732.485	216.908	-297.951	704.396	617.411	-271.13	734.322	387.836	-206.83	749.589	396.298	-220.276	759.772	318.68	-199.515	731.796	227.359
653	6.52	3.20093	1130.31	463.859	66.3404	1132.68	503.804	-66.6623	1125.89	501.565	167.31	964.366	581.798	-158.691	971.292	578.48	-0.37833	947.206	544.167	274.753	666.134	603.934	278.912	729.449	376.526	217.793	741.664	388.538	232.211	756.446	302.4	212.785	732.465	216.96	-297.972	704.392	617.433	-271.152	734.317	387.845	-206.771	749.543	396.239	-220.392	759.443	318.485	-199.533	731.792	227.388
654	6.53	3.14717	1130.36	463.865	66.2742	1132.71	503.791	-66.7158	1125.91	501.578	167.273	964.378	581.816	-158.745	971.304	578.495	-0.43724	947.241	544.135	274.755	666.117	603.917	278.885	729.443	376.54	217.767	741.695	388.549	232.169	756.509	302.368	212.733	732.478	216.927	-297.998	704.343	617.414	-271.198	734.328	387.865	-206.672	749.413	396.008	-220.699	758.593	317.973	-199.572	731.807	227.4
655	6.54	3.12196	1130.36	463.856	66.2485	1132.72	503.758	-66.7522	1125.91	501.571	167.259	964.383	581.773	-158.76	971.303	578.478	-0.46044	947.242	544.117	274.747	666.111	603.872	278.882	729.429	376.5	217.775	741.705	388.551	232.147	756.531	302.334	212.709	732.468	216.873	-298.004	704.293	617.35	-271.207	734.33	387.856	-206.724	749.423	396.047	-220.639	758.734	318.08	-199.582	731.809	227.382
656	6.55	3.09544	1130.35	463.888	66.243	1132.71	503.773	-66.7642	1125.91	501.6	167.256	964.38	581.762	-158.76	971.291	578.473	-0.45804	947.201	544.187	274.747	666.132	603.857	278.903	729.411	376.52	217.799	741.689	388.565	232.168	756.516	302.369	212.725	732.449	216.896	-297.997	704.274	617.331	-271.197	734.322	387.858	-206.814	749.464	396.185	-220.491	759.118	318.339	-199.58	731.791	227.389
657	6.56	3.05227	1130.35	463.971	66.2097	1132.72	503.807	-66.7933	1125.91	501.649	167.246	964.397	581.792	-158.77	971.281	578.492	-0.47275	947.202	544.174	274.763	666.146	603.874	278.906	729.415	376.536	217.799	741.671	388.58	232.197	756.518	302.41	212.714	732.449	216.892	-298.004	704.263	617.334	-271.196	734.314	387.866	-206.779	749.402	396.118	-220.583	758.817	318.207	-199.583	731.793	227.404
658	6.57	3.01854	1130.42	463.905	66.1839	1132.78	503.799	-66.8188	1125.93	501.639	167.236	964.43	581.784	-158.779	971.301	578.504	-0.49045	947.296	544.024	274.76	666.173	603.883	278.892	729.439	376.493	217.787	741.699	388.568	232.168	756.552	302.373	212.699	732.482	216.848	-298.005	704.269	617.373	-271.203	734.346	387.868	-206.915	749.538	396.316	-220.366	759.558	318.695	-199.583	731.81	227.385
659	6.58	3.02453	1130.49	463.806	66.1839	1132.82	503.784	-66.8184	1125.95	501.604	167.241	964.47	581.799	-158.766	971.323	578.506	-0.47314	947.394	543.925	274.751	666.197	603.911	278.912	729.47	376.482	217.787	741.724	388.542	232.131	756.557	302.342	212.722	732.509	216.812	-297.976	704.287	617.397	-271.175	734.383	387.824	-206.886	749.611	396.35	-220.279	759.802	318.754	-199.554	731.843	227.348
660	6.59	3.03574	1130.52	463.806	66.17	1132.85	503.783	-66.8264	1125.99	501.646	167.238	964.495	581.798	-158.758	971.336	578.525	-0.45453	947.419	543.949	274.741	666.24	603.962	278.938	729.511	376.509	217.802	741.741	388.534	232.133	756.552	302.326	212.753	732.53	216.846	-297.948	704.34	617.434	-271.143	734.405	387.826	-206.836	749.684	396.311	-220.238	759.886	318.777	-199.529	731.881	227.356
661	6.6	3.0211	1130.52	463.868	66.1584	1132.88	503.818	-66.8421	1126	501.663	167.241	964.512	581.791	-158.771	971.322	578.535	-0.46184	947.404	543.986	274.725	666.277	603.985	278.932	729.534	376.531	217.798	741.75	388.535	232.123	756.531	302.294	212.75	732.554	216.868	-297.945	704.37	617.491	-271.135	734.393	387.845	-206.755	749.64	396.142	-220.347	759.53	318.567	-199.524	731.9	227.36
662	6.61	3.00807	1130.51	463.912	66.1302	1132.88	503.829	-66.8537	1125.99	501.667	167.229	964.508	581.776	-158.776	971.298	578.536	-0.46021	947.367	544.001	274.71	666.287	603.979	278.922	729.528	376.496	217.795	741.734	388.525	232.131	756.502	302.289	212.749	732.549	216.877	-297.944	704.356	617.477	-271.129	734.369	387.818	-206.653	749.554	396.002	-220.5	759.047	318.229	-199.529	731.884	227.374
663	6.62	2.97681	1130.46	463.987	66.1055	1132.87	503.835	-66.8933	1125.96	501.711	167.202	964.476	581.763	-158.795	971.25	578.531	-0.47043	947.288	544.045	274.7	666.28	603.946	278.909	729.499	376.46	217.778	741.693	388.501	232.158	756.469	302.337	212.755	732.507	216.891	-297.954	704.263	617.402	-271.139	734.339	387.82	-206.781	749.606	396.203	-220.332	759.64	318.646	-199.53	731.841	227.387
664	6.63	2.9192	1130.36	464.168	66.0581	1132.84	503.84	-66.9565	1125.92	501.745	167.157	964.445	581.764	-158.825	971.195	578.548	-0.51562	947.183	544.165	274.699	666.299	603.964	278.888	729.456	376.502	217.737	741.656	388.509	232.153	756.441	302.361	212.734	732.453	216.908	-297.979	704.177	617.354	-271.176	734.297	387.846	-206.871	749.544	396.326	-220.32	759.735	318.775	-199.561	731.797	227.411
665	6.64	2.86244	1130.31	464.244	66.0107	1132.81	503.862	-67.0213	1125.89	501.785	167.115	964.428	581.761	-158.846	971.153	578.583	-0.57663	947.086	544.289	274.698	666.333	604.003	278.873	729.417	376.522	217.727	741.63	388.53	232.138	756.46	302.362	212.719	732.42	216.922	-297.996	704.103	617.313	-271.208	734.263	387.861	-206.951	749.473	396.403	-220.346	759.74	318.798	-199.591	731.77	227.412
666	6.65	2.82778	1130.34	464.171	65.9855	1132.8	503.844	-67.0389	1125.91	501.789	167.095	964.429	581.73	-158.86	971.132	578.583	-0.60158	947.098	544.227	274.703	666.319	603.983	278.863	729.411	376.503	217.725	741.64	388.518	232.146	756.476	302.392	212.705	732.419	216.895	-297.984	704.049	617.265	-271.214	734.258	387.847	-206.972	749.493	396.403	-220.366	759.753	318.772	-199.596	731.762	227.412
667	6.66	2.79073	1130.4	464.059	65.9708	1132.83	503.832	-67.0609	1125.94	501.763	167.088	964.443	581.733	-158.874	971.14	578.593	-0.61281	947.177	544.052	274.728	666.288	603.939	278.861	729.434	376.484	217.723	741.664	388.493	232.135	756.519	302.358	212.69	732.432	216.839	-297.981	704.042	617.282	-271.228	734.285	387.86	-206.969	749.516	396.359	-220.348	759.774	318.769	-199.615	731.787	227.4
668	6.67	2.75889	1130.51	463.897	65.9646	1132.87	503.842	-67.0752	1125.96	501.696	167.078	964.469	581.709	-158.873	971.165	578.549	-0.6239	947.25	543.956	274.746	666.332	603.985	278.864	729.482	376.46	217.734	741.713	388.506	232.112	756.61	302.301	212.687	732.453	216.803	-297.996	704.109	617.389	-271.231	734.315	387.861	-206.988	749.561	396.366	-220.327	759.794	318.791	-199.619	731.84	227.346
[truncated: 3 more columns]

## Sheet: Trial01
PathFileType	4	(X/Y/Z)	Trial01.trc
DataRate	CameraRate	NumFrames	NumMarkers	Units	OrigDataRate	OrigDataStartFrame	OrigNumFrames
100	100	684	16	mm	100	1	684
Frame#	Time	nasion			r zyg pr			l zyg pr			r should			l should			sternum			r elbow			r ulna			r radius			r hand			r finger			l elbow			l ulna			l radius			l hand			l finger
		X1	Y1	Z1	X2	Y2	Z2	X3	Y3	Z3	X4	Y4	Z4	X5	Y5	Z5	X6	Y6	Z6	X7	Y7	Z7	X8	Y8	Z8	X9	Y9	Z9	X10	Y10	Z10	X11	Y11	Z11	X12	Y12	Z12	X13	Y13	Z13	X14	Y14	Z14	X15	Y15	Z15	X16	Y16	Z16
1	0	-4.84252	1116.7	432.262	57.209	1118.49	473.649	-77.072	1107.67	466.997	154.811	962.188	538.878	-162.295	949.817	547.439	-9.6456	921.76	513.397	290.731	694.43	489.682	237.721	734.748	262.354	180.261	751.435	286.855	176.422	756.307	201.573	139.437	733.761	119.884	-291.616	706.033	479.285	-249.234	732.697	250.572	-187.396	755.46	260.969	-193.319	756.905	183.973	-171.88	732.055	95.9302
2	0.01	-4.85552	1116.64	432.093	57.2283	1118.44	473.606	-77.076	1107.59	466.9	154.814	962.173	538.835	-162.26	949.823	547.434	-9.60333	921.745	513.431	290.771	694.413	489.668	237.756	734.742	262.381	180.314	751.395	286.932	176.438	756.287	201.601	139.474	733.726	119.923	-291.636	706.053	479.257	-249.218	732.677	250.546	-187.39	755.462	260.959	-193.346	756.91	183.907	-171.848	732.037	95.9404
3	0.02	-4.89077	1116.62	431.961	57.2159	1118.41	473.539	-77.1133	1107.55	466.778	154.806	962.172	538.786	-162.25	949.834	547.421	-9.6106	921.724	513.433	290.803	694.391	489.657	237.766	734.754	262.406	180.332	751.407	286.968	176.44	756.294	201.654	139.476	733.745	119.936	-291.672	706.092	479.278	-249.238	732.676	250.548	-187.403	755.464	260.983	-193.369	756.936	183.919	-171.853	732.048	95.9755
4	0.03	-4.91087	1116.57	431.747	57.196	1118.37	473.366	-77.1445	1107.49	466.636	154.805	962.153	538.679	-162.218	949.84	547.328	-9.60581	921.72	513.323	290.833	694.381	489.628	237.777	734.759	262.364	180.346	751.411	286.95	176.451	756.291	201.639	139.485	733.746	119.927	-291.67	706.111	479.286	-249.24	732.67	250.516	-187.398	755.455	260.964	-193.342	756.929	183.916	-171.843	732.05	95.9207
5	0.04	-4.95004	1116.5	431.527	57.189	1118.34	473.209	-77.1767	1107.42	466.533	154.812	962.13	538.566	-162.175	949.834	547.224	-9.57287	921.654	513.306	290.904	694.372	489.593	237.788	734.745	262.336	180.362	751.395	286.938	176.474	756.274	201.597	139.503	733.723	119.91	-291.658	706.111	479.267	-249.22	732.663	250.475	-187.395	755.439	260.935	-193.312	756.911	183.897	-171.823	732.03	95.8992
6	0.05	-4.99746	1116.4	431.479	57.1824	1118.28	473.116	-77.2114	1107.34	466.451	154.806	962.094	538.538	-162.16	949.814	547.191	-9.56625	921.581	513.311	290.969	694.352	489.598	237.772	734.729	262.371	180.359	751.351	287.015	176.459	756.244	201.635	139.476	733.696	119.93	-291.679	706.094	479.272	-249.224	732.644	250.518	-187.411	755.437	260.961	-193.346	756.904	183.908	-171.829	732	95.9338
7	0.06	-5.07365	1116.33	431.329	57.1362	1118.23	472.978	-77.2543	1107.28	466.356	154.793	962.077	538.517	-162.164	949.821	547.156	-9.58051	921.567	513.283	290.99	694.372	489.592	237.75	734.738	262.397	180.318	751.362	287.026	176.414	756.265	201.642	139.444	733.699	119.954	-291.702	706.065	479.257	-249.248	732.645	250.554	-187.425	755.432	260.984	-193.376	756.909	183.923	-171.854	732.002	95.9711
8	0.07	-5.10021	1116.29	431.018	57.1038	1118.21	472.73	-77.2697	1107.23	466.183	154.785	962.053	538.414	-162.147	949.837	547.048	-9.57105	921.576	513.128	290.996	694.425	489.558	237.748	734.763	262.37	180.305	751.382	286.943	176.391	756.278	201.6	139.433	733.715	119.904	-291.702	706.05	479.2	-249.245	732.652	250.488	-187.424	755.433	260.961	-193.354	756.897	183.898	-171.841	732.007	95.9253
9	0.08	-5.06938	1116.24	430.768	57.0867	1118.18	472.536	-77.2404	1107.17	465.998	154.8	962.031	538.314	-162.113	949.851	546.954	-9.53934	921.542	513.067	291.022	694.452	489.564	237.765	734.772	262.342	180.314	751.401	286.908	176.4	756.28	201.575	139.435	733.719	119.887	-291.717	706.097	479.225	-249.216	732.661	250.448	-187.416	755.444	260.921	-193.331	756.879	183.859	-171.817	732.006	95.8633
10	0.09	-5.02339	1116.17	430.608	57.0872	1118.15	472.39	-77.2321	1107.12	465.853	154.807	962.031	538.29	-162.09	949.868	546.914	-9.53431	921.538	513.027	291.054	694.454	489.558	237.773	734.795	262.35	180.324	751.417	286.938	176.392	756.309	201.579	139.434	733.731	119.896	-291.73	706.136	479.24	-249.213	732.676	250.481	-187.41	755.449	260.945	-193.319	756.886	183.836	-171.811	732.018	95.8586
11	0.1	-5.00799	1116.17	430.397	57.1073	1118.13	472.269	-77.2187	1107.09	465.739	154.809	962.048	538.287	-162.076	949.899	546.869	-9.55289	921.588	512.896	291.046	694.451	489.532	237.76	734.839	262.346	180.308	751.446	286.91	176.368	756.344	201.567	139.416	733.769	119.902	-291.715	706.156	479.236	-249.222	732.685	250.514	-187.402	755.479	260.965	-193.319	756.927	183.865	-171.817	732.055	95.8524
12	0.11	-4.95514	1116.17	430.197	57.1639	1118.09	472.125	-77.1503	1107.04	465.596	154.826	962.065	538.265	-162.05	949.926	546.824	-9.53563	921.568	512.9	291.057	694.416	489.475	237.757	734.864	262.347	180.328	751.462	286.903	176.375	756.366	201.566	139.43	733.79	119.905	-291.702	706.174	479.231	-249.213	732.691	250.493	-187.386	755.501	260.957	-193.304	756.96	183.901	-171.801	732.067	95.8649
13	0.12	-4.85647	1116.07	430.113	57.2681	1117.99	472.04	-77.074	1106.96	465.439	154.86	962.031	538.24	-162.004	949.923	546.744	-9.45935	921.467	512.979	291.126	694.347	489.421	237.797	734.848	262.359	180.385	751.432	286.978	176.417	756.335	201.598	139.458	733.767	119.942	-291.733	706.227	479.279	-249.189	732.668	250.499	-187.367	755.473	260.962	-193.286	756.959	183.872	-171.76	732.044	95.8802
14	0.13	-4.7657	1115.96	430.054	57.3702	1117.89	471.977	-76.9983	1106.89	465.303	154.883	961.989	538.202	-161.97	949.906	546.656	-9.42302	921.374	513.013	291.179	694.307	489.379	237.826	734.813	262.357	180.407	751.394	287	176.461	756.287	201.644	139.468	733.742	119.949	-291.766	706.216	479.253	-249.17	732.639	250.474	-187.364	755.439	260.965	-193.265	756.926	183.787	-171.741	732.024	95.8712
15	0.14	-4.7044	1115.91	429.893	57.428	1117.82	471.827	-76.9405	1106.85	465.143	154.88	961.98	538.184	-161.955	949.901	546.606	-9.43945	921.343	512.952	291.2	694.299	489.354	237.802	734.794	262.339	180.386	751.386	286.994	176.448	756.268	201.646	139.453	733.729	119.93	-291.778	706.156	479.211	-249.169	732.629	250.456	-187.383	755.425	260.953	-193.247	756.907	183.775	-171.749	732.007	95.8525
16	0.15	-4.65013	1115.85	429.776	57.4638	1117.74	471.697	-76.899	1106.81	465.045	154.866	961.957	538.155	-161.965	949.904	546.564	-9.45231	921.306	512.924	291.202	694.327	489.364	237.784	734.799	262.336	180.363	751.385	286.973	176.412	756.265	201.616	139.429	733.723	119.928	-291.795	706.11	479.179	-249.186	732.633	250.471	-187.406	755.422	260.94	-193.25	756.873	183.844	-171.768	731.999	95.8527
17	0.16	-4.59986	1115.77	429.748	57.5217	1117.69	471.647	-76.8559	1106.78	464.97	154.865	961.946	538.146	-161.979	949.925	546.549	-9.46112	921.271	512.924	291.214	694.368	489.38	237.78	734.803	262.358	180.339	751.376	286.989	176.367	756.263	201.618	139.414	733.716	119.965	-291.807	706.107	479.152	-249.206	732.641	250.461	-187.43	755.41	260.958	-193.288	756.851	183.892	-171.788	732.006	95.8722
18	0.17	-4.55173	1115.75	429.639	57.565	1117.65	471.559	-76.8061	1106.76	464.868	154.859	961.942	538.144	-161.977	949.947	546.52	-9.46623	921.297	512.853	291.221	694.369	489.379	237.762	734.813	262.332	180.309	751.382	286.995	176.332	756.289	201.638	139.393	733.73	119.974	-291.802	706.152	479.165	-249.22	732.643	250.47	-187.427	755.434	260.963	-193.315	756.876	183.877	-171.81	732.015	95.8521
19	0.18	-4.49508	1115.76	429.486	57.6047	1117.61	471.421	-76.7233	1106.75	464.728	154.855	961.936	538.114	-161.959	949.986	546.479	-9.43944	921.328	512.794	291.236	694.359	489.364	237.764	734.844	262.314	180.319	751.422	286.959	176.32	756.314	201.619	139.386	733.769	119.948	-291.778	706.198	479.195	-249.216	732.65	250.453	-187.404	755.469	260.91	-193.292	756.912	183.84	-171.806	732.037	95.8444
20	0.19	-4.39877	1115.77	429.362	57.7046	1117.6	471.37	-76.6188	1106.75	464.592	154.886	961.941	538.093	-161.92	950.032	546.413	-9.3897	921.343	512.752	291.262	694.354	489.318	237.79	734.873	262.314	180.362	751.447	286.95	176.352	756.342	201.61	139.422	733.776	119.949	-291.758	706.261	479.239	-249.192	732.656	250.448	-187.39	755.476	260.897	-193.259	756.918	183.835	-171.78	732.043	95.8219
21	0.2	-4.27919	1115.73	429.341	57.8086	1117.57	471.341	-76.516	1106.74	464.489	154.928	961.918	538.076	-161.874	950.05	546.351	-9.35537	921.353	512.746	291.298	694.361	489.328	237.813	734.888	262.345	180.394	751.444	286.958	176.38	756.342	201.599	139.45	733.767	119.957	-291.759	706.295	479.276	-249.179	732.673	250.448	-187.383	755.481	260.887	-193.245	756.928	183.807	-171.754	732.042	95.8224
22	0.21	-4.21521	1115.69	429.342	57.8542	1117.5	471.298	-76.4644	1106.72	464.468	154.954	961.888	538.1	-161.861	950.042	546.367	-9.32711	921.317	512.821	291.324	694.343	489.319	237.797	734.884	262.365	180.386	751.442	286.97	176.371	756.341	201.626	139.425	733.776	119.928	-291.741	706.267	479.289	-249.192	732.67	250.449	-187.392	755.47	260.917	-193.266	756.914	183.79	-171.761	732.023	95.8415
23	0.22	-4.20786	1115.65	429.36	57.8748	1117.47	471.285	-76.4566	1106.7	464.452	154.954	961.864	538.125	-161.887	950.036	546.412	-9.35348	921.266	512.881	291.343	694.314	489.301	237.747	734.882	262.362	180.335	751.431	286.99	176.331	756.331	201.639	139.375	733.763	119.944	-291.724	706.204	479.264	-249.235	732.639	250.507	-187.42	755.453	260.948	-193.322	756.899	183.852	-171.8	732.003	95.9039
24	0.23	-4.18082	1115.59	429.448	57.8966	1117.43	471.262	-76.4397	1106.7	464.43	154.942	961.835	538.14	-161.908	950.034	546.432	-9.3869	921.25	512.881	291.368	694.272	489.259	237.707	734.873	262.348	180.29	751.392	287.044	176.279	756.299	201.641	139.324	733.758	119.965	-291.746	706.158	479.225	-249.276	732.623	250.538	-187.451	755.426	260.969	-193.373	756.881	183.908	-171.834	732.005	95.9017
25	0.24	-4.11112	1115.54	429.493	57.9478	1117.39	471.231	-76.3724	1106.68	464.348	154.948	961.79	538.095	-161.895	950.029	546.397	-9.37382	921.225	512.9	291.376	694.25	489.221	237.719	734.851	262.327	180.278	751.358	287.062	176.272	756.264	201.671	139.334	733.725	119.985	-291.76	706.12	479.178	-249.266	732.614	250.493	-187.463	755.397	260.945	-193.364	756.845	183.883	-171.828	731.976	95.8714
26	0.25	-4.02071	1115.5	429.482	58.0295	1117.36	471.248	-76.2785	1106.67	464.3	154.984	961.755	538.087	-161.848	950.021	546.364	-9.30991	921.171	512.975	291.388	694.235	489.197	237.762	734.834	262.326	180.321	751.339	287.06	176.299	756.224	201.67	139.4	733.677	119.998	-291.753	706.116	479.187	-249.222	732.598	250.48	-187.43	755.377	260.954	-193.306	756.83	183.832	-171.786	731.956	95.8696
27	0.26	-3.95499	1115.5	429.491	58.1003	1117.37	471.301	-76.2081	1106.72	464.293	155.014	961.748	538.101	-161.808	950.035	546.357	-9.25567	921.157	513.043	291.409	694.196	489.142	237.777	734.86	262.333	180.353	751.349	287.069	176.326	756.225	201.667	139.416	733.689	119.994	-291.756	706.169	479.228	-249.191	732.599	250.505	-187.396	755.399	260.967	-193.27	756.863	183.851	-171.759	731.976	95.8694
28	0.27	-3.93108	1115.54	429.489	58.1332	1117.4	471.359	-76.1829	1106.79	464.291	155.009	961.756	538.093	-161.802	950.09	546.345	-9.24795	921.201	513.003	291.387	694.191	489.119	237.767	734.912	262.34	180.342	751.377	287.086	176.29	756.295	201.655	139.395	733.733	119.997	-291.766	706.235	479.291	-249.204	732.625	250.486	-187.404	755.443	260.942	-193.277	756.903	183.886	-171.781	732.007	95.8472
29	0.28	-3.90511	1115.59	429.438	58.1429	1117.42	471.282	-76.152	1106.83	464.237	155.002	961.765	538.055	-161.792	950.124	546.325	-9.24463	921.25	512.93	291.384	694.216	489.134	237.755	734.963	262.329	180.334	751.41	287.085	176.264	756.357	201.647	139.386	733.77	119.987	-291.749	706.273	479.291	-249.212	732.639	250.454	-187.399	755.472	260.908	-193.282	756.933	183.849	-171.792	732.027	95.834
30	0.29	-3.85563	1115.64	429.44	58.1775	1117.44	471.287	-76.1127	1106.86	464.264	155.031	961.748	538.069	-161.772	950.131	546.316	-9.22925	921.267	512.887	291.39	694.255	489.203	237.748	734.979	262.336	180.333	751.426	287.049	176.262	756.36	201.655	139.387	733.777	119.978	-291.735	706.294	479.277	-249.205	732.641	250.445	-187.389	755.484	260.901	-193.268	756.938	183.781	-171.778	732.042	95.8257
31	0.3	-3.83342	1115.72	429.435	58.1988	1117.48	471.337	-75.9215	1106.93	464.385	155.056	961.744	538.122	-161.771	950.145	546.334	-9.22796	921.306	512.882	291.379	694.264	489.218	237.742	735.003	262.357	180.31	751.463	287.031	176.253	756.371	201.683	139.37	733.81	119.981	-291.742	706.286	479.295	-249.227	732.654	250.486	-187.402	755.5	260.948	-193.278	756.937	183.814	-171.786	732.062	95.8665
32	0.31	-3.86072	1115.8	429.314	58.194	1117.52	471.319	-75.5119	1106.99	464.485	155.064	961.728	538.135	-161.778	950.156	546.307	-9.25496	921.365	512.788	291.393	694.305	489.263	237.728	735.022	262.332	180.276	751.49	286.967	176.25	756.382	201.639	139.352	733.842	119.929	-291.757	706.243	479.265	-249.247	732.658	250.482	-187.423	755.492	260.939	-193.289	756.918	183.86	-171.811	732.053	95.8852
33	0.32	-3.84752	1115.82	429.34	58.2179	1117.51	471.347	-75.3855	1107	464.513	155.085	961.691	538.127	-161.771	950.134	546.267	-9.23465	921.334	512.827	291.409	694.306	489.297	237.732	735.009	262.312	180.267	751.46	286.968	176.25	756.345	201.61	139.358	733.814	119.903	-291.739	706.19	479.213	-249.239	732.646	250.457	-187.437	755.463	260.919	-193.278	756.89	183.826	-171.802	732.025	95.8727
34	0.33	-3.79077	1115.76	429.594	58.2756	1117.51	471.506	-75.3211	1107.01	464.617	155.092	961.655	538.134	-161.753	950.116	546.291	-9.18896	921.259	512.99	291.422	694.246	489.308	237.739	734.981	262.359	180.284	751.405	287.076	176.246	756.301	201.666	139.372	733.759	119.96	-291.73	706.156	479.207	-249.223	732.625	250.491	-187.419	755.438	260.932	-193.281	756.872	183.831	-171.783	731.994	95.8949
35	0.34	-3.75742	1115.77	429.763	58.2854	1117.54	471.611	-75.3023	1107.02	464.722	155.087	961.635	538.163	-161.759	950.118	546.335	-9.18206	921.219	513.109	291.414	694.171	489.211	237.724	734.962	262.4	180.286	751.368	287.154	176.247	756.282	201.726	139.36	733.726	120.015	-291.74	706.184	479.232	-249.224	732.597	250.524	-187.42	755.421	260.975	-193.305	756.88	183.899	-171.783	731.99	95.9292
36	0.35	-3.72187	1115.81	429.787	58.2934	1117.56	471.597	-75.277	1107.05	464.723	155.085	961.613	538.154	-161.753	950.122	546.287	-9.16108	921.21	513.114	291.401	694.125	489.17	237.727	734.944	262.393	180.29	751.359	287.171	176.251	756.27	201.703	139.371	733.721	120.001	-291.751	706.236	479.265	-249.214	732.582	250.48	-187.407	755.421	260.946	-193.312	756.885	183.866	-171.78	731.986	95.8702
37	0.36	-3.66525	1115.85	429.825	58.3263	1117.59	471.655	-75.22	1107.1	464.706	155.117	961.602	538.173	-161.729	950.119	546.235	-9.12356	921.214	513.124	291.393	694.095	489.169	237.752	734.946	262.362	180.315	751.356	287.153	176.264	756.264	201.682	139.406	733.721	119.969	-291.75	706.253	479.264	-249.201	732.583	250.472	-187.373	755.416	260.926	-193.275	756.876	183.795	-171.743	731.971	95.8382
38	0.37	-3.65808	1115.93	429.802	58.3405	1117.64	471.691	-75.2082	1107.15	464.733	155.135	961.611	538.209	-161.734	950.141	546.217	-9.123	921.249	513.105	291.368	694.111	489.199	237.746	734.956	262.37	180.307	751.364	287.147	176.252	756.279	201.692	139.418	733.72	119.984	-291.738	706.245	479.253	-249.196	732.578	250.479	-187.375	755.411	260.951	-193.253	756.878	183.812	-171.743	731.968	95.8649
39	0.38	-3.69864	1116.06	429.723	58.2981	1117.72	471.679	-75.2368	1107.22	464.762	155.114	961.64	538.21	-161.763	950.171	546.227	-9.1651	921.307	513.048	291.334	694.149	489.226	237.714	734.987	262.372	180.265	751.392	287.124	176.216	756.31	201.68	139.372	733.738	119.994	-291.747	706.281	479.278	-249.231	732.608	250.487	-187.416	755.443	260.956	-193.286	756.89	183.87	-171.788	731.99	95.8635
40	0.39	-3.70751	1116.14	429.744	58.2789	1117.8	471.685	-75.2608	1107.29	464.79	155.115	961.664	538.216	-161.769	950.192	546.212	-9.19392	921.396	512.963	291.327	694.189	489.242	237.69	735.013	262.36	180.231	751.426	287.089	176.197	756.332	201.662	139.332	733.772	119.971	-291.75	706.282	479.262	-249.259	732.639	250.472	-187.444	755.47	260.93	-193.32	756.889	183.891	-171.81	732.025	95.8689
41	0.4	-3.68109	1116.2	429.806	58.2972	1117.84	471.745	-75.2578	1107.32	464.838	155.135	961.665	538.252	-161.751	950.196	546.221	-9.18596	921.41	512.965	291.327	694.219	489.301	237.698	735.013	262.395	180.227	751.438	287.073	176.216	756.314	201.707	139.331	733.795	119.959	-291.761	706.247	479.236	-249.273	732.632	250.502	-187.448	755.466	260.943	-193.339	756.883	183.87	-171.814	732.026	95.8701
42	0.41	-3.66423	1116.23	429.838	58.3091	1117.87	471.809	-75.2622	1107.33	464.849	155.159	961.641	538.271	-161.726	950.178	546.208	-9.15323	921.386	513.018	291.332	694.207	489.328	237.707	734.998	262.423	180.236	751.422	287.112	176.232	756.304	201.745	139.358	733.782	120.002	-291.771	706.24	479.272	-249.276	732.618	250.506	-187.447	755.458	260.971	-193.327	756.849	183.874	-171.805	732.001	95.8655
43	0.42	-3.64915	1116.29	429.81	58.3019	1117.92	471.792	-75.2442	1107.38	464.826	155.196	961.635	538.255	-161.697	950.185	546.16	-9.12109	921.391	512.969	291.344	694.206	489.331	237.717	735.001	262.398	180.247	751.425	287.103	176.231	756.309	201.727	139.383	733.789	119.994	-291.752	706.242	479.263	-249.259	732.615	250.468	-187.425	755.447	260.947	-193.287	756.842	183.836	-171.795	731.996	95.8565
44	0.43	-3.64625	1116.35	429.77	58.3047	1117.99	471.781	-75.2381	1107.41	464.784	155.223	961.646	538.275	-161.669	950.206	546.116	-9.08492	921.406	512.984	291.329	694.194	489.321	237.721	735.012	262.379	180.247	751.445	287.086	176.22	756.329	201.708	139.385	733.81	119.975	-291.74	706.258	479.243	-249.262	732.626	250.46	-187.415	755.461	260.928	-193.281	756.882	183.817	-171.782	732.012	95.8289
45	0.44	-3.63795	1116.36	429.821	58.2941	1118.06	471.771	-75.2483	1107.43	464.825	155.231	961.637	538.29	-161.662	950.209	546.086	-9.05592	921.409	513.064	291.32	694.149	489.254	237.711	735.015	262.363	180.245	751.425	287.127	176.208	756.324	201.687	139.377	733.79	119.998	-291.756	706.269	479.253	-249.262	732.615	250.487	-187.42	755.444	260.944	-193.288	756.903	183.85	-171.766	732.002	95.8112
46	0.45	-3.61182	1116.34	429.907	58.3176	1118.08	471.767	-75.2146	1107.43	464.83	155.251	961.616	538.304	-161.63	950.213	546.034	-9.01193	921.379	513.135	291.324	694.131	489.249	237.729	735	262.369	180.283	751.378	287.202	176.239	756.287	201.685	139.394	733.755	119.989	-291.756	706.282	479.268	-249.233	732.587	250.482	-187.406	755.423	260.945	-193.275	756.879	183.831	-171.741	731.97	95.8231
47	0.46	-3.57611	1116.35	429.962	58.3511	1118.09	471.774	-75.1677	1107.44	464.813	155.285	961.604	538.303	-161.588	950.214	545.993	-8.97737	921.366	513.163	291.349	694.116	489.248	237.751	734.976	262.372	180.321	751.354	287.205	176.255	756.272	201.69	139.407	733.733	119.986	-291.721	706.276	479.244	-249.213	732.575	250.452	-187.397	755.423	260.912	-193.273	756.88	183.795	-171.722	731.953	95.8126
48	0.47	-3.58987	1116.4	429.948	58.3532	1118.14	471.793	-75.3594	1107.5	464.777	155.278	961.622	538.321	-161.582	950.236	545.975	-9.00137	921.404	513.155	291.359	694.111	489.225	237.741	734.976	262.404	180.305	751.368	287.175	176.249	756.263	201.743	139.393	733.754	120.009	-291.707	706.277	479.252	-249.226	732.579	250.476	-187.414	755.438	260.903	-193.297	756.901	183.801	-171.74	731.969	95.8411
49	0.48	-3.61026	1116.45	429.895	58.348	1118.17	471.77	-75.7972	1107.54	464.671	155.267	961.633	538.308	-161.584	950.259	545.963	-9.02757	921.476	513.113	291.342	694.158	489.269	237.721	734.976	262.42	180.284	751.385	287.182	176.231	756.268	201.744	139.374	733.776	120.012	-291.728	706.264	479.264	-249.249	732.592	250.479	-187.426	755.448	260.895	-193.302	756.899	183.809	-171.761	731.968	95.8363
50	0.49	-3.58083	1116.51	429.866	58.3571	1118.19	471.71	-75.7102	1107.59	464.659	155.303	961.649	538.279	-161.576	950.262	545.925	-9.02446	921.544	513.046	291.331	694.223	489.364	237.709	734.972	262.398	180.254	751.398	287.145	176.217	756.297	201.706	139.368	733.79	119.993	-291.713	706.249	479.221	-249.238	732.595	250.445	-187.443	755.442	260.879	-193.308	756.864	183.784	-171.768	731.977	95.7911
51	0.5	-3.57306	1116.58	429.783	58.3656	1118.25	471.691	-75.5134	1107.65	464.688	155.311	961.678	538.28	-161.579	950.276	545.88	-9.03797	921.623	512.987	291.329	694.263	489.398	237.687	734.987	262.384	180.197	751.425	287.087	176.191	756.329	201.686	139.357	733.805	119.98	-291.698	706.226	479.168	-249.24	732.593	250.415	-187.469	755.453	260.868	-193.345	756.853	183.76	-171.805	732.003	95.7885
52	0.51	-3.58395	1116.62	429.77	58.3815	1118.29	471.659	-75.841	1107.7	464.632	155.285	961.7	538.26	-161.603	950.301	545.887	-9.08302	921.67	513.004	291.313	694.289	489.419	237.656	735.001	262.388	180.166	751.438	287.129	176.147	756.336	201.687	139.324	733.819	119.994	-291.707	706.232	479.207	-249.262	732.589	250.427	-187.499	755.464	260.892	-193.403	756.863	183.797	-171.84	732.014	95.7945
53	0.52	-3.53264	1116.64	429.737	58.434	1118.3	471.628	-75.8625	1107.7	464.57	155.288	961.688	538.247	-161.596	950.286	545.864	-9.06091	921.677	513.005	291.299	694.244	489.347	237.666	734.994	262.408	180.179	751.428	287.114	176.148	756.314	201.686	139.337	733.796	120.005	-291.69	706.235	479.244	-249.223	732.552	250.445	-187.483	755.437	260.877	-193.426	756.842	183.812	-171.839	731.989	95.7949
54	0.53	-3.40617	1116.65	429.771	58.5343	1118.27	471.631	-75.7832	1107.68	464.504	155.322	961.674	538.242	-161.564	950.278	545.825	-8.99081	921.672	512.992	291.319	694.188	489.277	237.718	734.986	262.425	180.257	751.398	287.127	176.199	756.299	201.699	139.384	733.781	119.985	-291.662	706.233	479.241	-249.106	732.504	250.436	-187.445	755.412	260.826	-193.421	756.841	183.734	-171.816	731.965	95.7545
55	0.54	-3.295	1116.63	429.849	58.6328	1118.24	471.655	-75.7074	1107.69	464.464	155.366	961.668	538.25	-161.556	950.299	545.811	-8.93405	921.63	513.072	291.362	694.188	489.272	237.752	734.972	262.432	180.314	751.366	287.177	176.254	756.287	201.721	139.419	733.757	119.982	-291.631	706.229	479.224	-248.979	732.472	250.446	-187.427	755.382	260.825	-193.417	756.85	183.715	-171.797	731.953	95.7515
56	0.55	-3.22917	1116.64	429.876	58.7129	1118.24	471.646	-75.6334	1107.73	464.43	155.386	961.668	538.238	-161.576	950.314	545.792	-8.93187	921.637	513.134	291.385	694.182	489.198	237.755	734.965	262.423	180.318	751.354	287.171	176.269	756.283	201.723	139.418	733.749	119.997	-291.609	706.191	479.231	-248.871	732.457	250.475	-187.422	755.367	260.865	-193.413	756.851	183.719	-171.791	731.955	95.7633
57	0.56	-3.14997	1116.66	429.86	58.7791	1118.24	471.625	-75.5731	1107.77	464.35	155.386	961.667	538.24	-161.587	950.327	545.746	-8.93511	921.707	513.065	291.36	694.189	489.194	237.747	734.945	262.428	180.302	751.356	287.146	176.261	756.28	201.706	139.42	733.75	119.984	-291.56	706.072	479.16	-248.759	732.461	250.484	-187.402	755.348	260.861	-193.385	756.825	183.747	-171.789	731.941	95.7633
58	0.57	-3.04042	1116.65	429.899	58.8503	1118.23	471.64	-75.5139	1107.78	464.298	155.364	961.665	538.26	-161.607	950.318	545.719	-8.9398	921.745	513.061	291.348	694.228	489.252	237.729	734.916	262.435	180.282	751.339	287.179	176.259	756.255	201.73	139.405	733.747	119.999	-291.524	705.954	479.096	-248.671	732.477	250.519	-187.386	755.312	260.866	-193.372	756.777	183.722	-171.737	731.937	95.8053
59	0.58	-2.94971	1116.65	429.942	58.9347	1118.2	471.665	-75.4565	1107.78	464.254	155.342	961.69	538.306	-161.651	950.298	545.696	-8.96588	921.738	513.147	291.371	694.294	489.34	237.715	734.893	262.46	180.247	751.312	287.215	176.244	756.23	201.755	139.369	733.727	120.015	-291.487	705.847	479.045	-248.61	732.517	250.529	-187.374	755.269	260.905	-193.375	756.728	183.711	-171.661	731.928	95.8585
60	0.59	-2.83801	1116.68	429.945	59.0098	1118.2	471.675	-75.3879	1107.81	464.159	155.335	961.72	538.319	-161.692	950.307	545.625	-8.99709	921.801	513.094	291.369	694.329	489.357	237.708	734.885	262.468	180.221	751.312	287.208	176.247	756.243	201.757	139.364	733.749	120.034	-291.442	705.785	479.018	-248.537	732.615	250.494	-187.338	755.23	260.949	-193.343	756.67	183.677	-171.584	731.947	95.8741
61	0.6	-2.68522	1116.76	429.786	59.1113	1118.23	471.658	-75.2935	1107.87	464.051	155.343	961.763	538.3	-161.694	950.339	545.565	-8.98096	921.918	512.98	291.363	694.38	489.357	237.712	734.912	262.437	180.222	751.38	287.102	176.26	756.266	201.72	139.383	733.793	120.008	-291.358	705.759	478.986	-248.438	732.737	250.421	-187.282	755.229	260.928	-193.25	756.583	183.593	-171.451	731.976	95.8576
62	0.61	-2.49415	1116.82	429.625	59.2317	1118.22	471.699	-75.194	1107.91	463.993	155.372	961.801	538.328	-161.692	950.375	545.504	-8.93735	921.981	512.977	291.352	694.416	489.384	237.738	734.93	262.419	180.241	751.425	287.057	176.301	756.3	201.718	139.415	733.818	119.983	-291.265	705.751	479.003	-248.325	732.847	250.365	-187.199	755.234	260.931	-193.142	756.488	183.509	-171.276	731.984	95.8952
63	0.62	-2.30668	1116.85	429.536	59.3355	1118.23	471.739	-75.0822	1107.92	463.955	155.393	961.824	538.328	-161.68	950.399	545.421	-8.88141	922.045	512.928	291.36	694.422	489.389	237.776	734.921	262.426	180.274	751.445	287.065	176.345	756.308	201.726	139.45	733.817	119.979	-291.183	705.718	479.042	-248.227	732.968	250.328	-187.107	755.222	260.947	-193.037	756.385	183.444	-171.1	731.967	95.921
64	0.63	-2.16595	1116.86	429.498	59.4358	1118.22	471.751	-74.9897	1107.94	463.907	155.419	961.844	538.34	-161.68	950.401	545.344	-8.83141	922.116	512.869	291.363	694.421	489.382	237.788	734.912	262.432	180.304	751.446	287.073	176.376	756.306	201.719	139.462	733.823	119.958	-291.076	705.649	479.042	-248.145	733.064	250.28	-187.019	755.224	260.949	-192.967	756.268	183.363	-170.937	731.962	95.9316
65	0.64	-2.08301	1116.85	429.554	59.501	1118.19	471.772	-74.9099	1107.95	463.9	155.432	961.838	538.369	-161.687	950.401	545.327	-8.83878	922.142	512.905	291.363	694.405	489.34	237.771	734.888	262.431	180.295	751.419	287.072	176.376	756.279	201.728	139.463	733.795	119.957	-290.983	705.567	479.017	-248.079	733.159	250.238	-186.953	755.211	260.963	-192.9	756.105	183.343	-170.787	731.954	96.0038
66	0.65	-2.00475	1116.77	429.705	59.5557	1118.16	471.832	-74.8433	1107.95	463.92	155.425	961.843	538.389	-161.698	950.394	545.303	-8.85833	922.118	513.003	291.371	694.423	489.351	237.745	734.834	262.465	180.258	751.356	287.145	176.359	756.239	201.765	139.446	733.753	119.976	-290.909	705.47	479.026	-248.037	733.298	250.262	-186.88	755.125	261.011	-192.805	755.933	183.327	-170.637	731.946	96.0578
67	0.66	-1.93007	1116.75	429.747	59.5971	1118.16	471.861	-74.7895	1107.95	463.92	155.419	961.855	538.395	-161.704	950.4	545.254	-8.86377	922.139	513.044	291.361	694.453	489.342	237.737	734.806	262.495	180.221	751.316	287.192	176.338	756.203	201.737	139.42	733.739	119.981	-290.793	705.302	478.932	-248.013	733.481	250.281	-186.768	755.054	261.028	-192.709	755.782	183.271	-170.495	731.948	96.0844
68	0.67	-1.86763	1116.78	429.734	59.6501	1118.18	471.921	-74.7527	1107.97	463.94	155.422	961.871	538.405	-161.722	950.417	545.213	-8.8625	922.192	513.057	291.365	694.48	489.342	237.72	734.805	262.504	180.2	751.323	287.179	176.343	756.197	201.763	139.41	733.737	119.996	-290.691	705.19	478.883	-247.968	733.672	250.306	-186.656	755.04	261.038	-192.611	755.674	183.24	-170.381	731.949	96.1225
69	0.68	-1.79392	1116.84	429.722	59.6999	1118.2	471.946	-74.6994	1108.01	463.939	155.431	961.889	538.444	-161.736	950.439	545.167	-8.85242	922.248	513.044	291.372	694.523	489.418	237.715	734.8	262.496	180.205	751.346	287.177	176.358	756.203	201.794	139.431	733.743	119.998	-290.599	705.127	478.882	-247.912	733.85	250.288	-186.531	755.04	260.988	-192.524	755.582	183.201	-170.276	731.967	96.1576
70	0.69	-1.72639	1116.86	429.673	59.7598	1118.21	471.973	-74.6179	1108.06	463.896	155.453	961.91	538.441	-161.717	950.448	545.14	-8.80679	922.308	512.973	291.371	694.543	489.419	237.726	734.785	262.505	180.208	751.369	287.166	176.393	756.217	201.766	139.458	733.755	119.974	-290.485	705.077	478.9	-247.831	734.01	250.261	-186.386	755.042	260.927	-192.403	755.479	183.127	-170.158	731.967	96.1639
71	0.7	-1.66843	1116.89	429.63	59.8186	1118.22	471.983	-74.5469	1108.11	463.846	155.488	961.929	538.438	-161.703	950.456	545.102	-8.7663	922.363	512.917	291.378	694.556	489.398	237.748	734.783	262.518	180.233	751.378	287.144	176.432	756.22	201.765	139.483	733.762	119.946	-290.374	705.048	478.902	-247.752	734.14	250.24	-186.258	755.034	260.865	-192.297	755.382	183.069	-170.051	731.97	96.179
72	0.71	-1.63639	1116.89	429.702	59.8479	1118.23	472.004	-74.5285	1108.14	463.878	155.502	961.941	538.461	-161.713	950.472	545.081	-8.77364	922.385	512.993	291.416	694.59	489.4	237.743	734.778	262.526	180.232	751.382	287.151	176.457	756.213	201.801	139.478	733.753	119.934	-290.305	705.024	478.895	-247.716	734.257	250.274	-186.187	755.013	260.861	-192.246	755.314	183.048	-169.974	731.97	96.1779
73	0.72	-1.65335	1116.93	429.761	59.8587	1118.27	472.078	-74.5431	1108.18	463.959	155.472	961.965	538.467	-161.756	950.484	545.047	-8.80447	922.403	513.066	291.439	694.621	489.376	237.714	734.754	262.548	180.193	751.377	287.171	176.441	756.205	201.804	139.452	733.76	119.932	-290.256	704.946	478.867	-247.702	734.335	250.294	-186.163	754.991	260.889	-192.223	755.241	183.062	-169.938	731.968	96.2083
74	0.73	-1.65634	1116.97	429.769	59.8543	1118.29	472.089	-74.5252	1108.21	464.004	155.458	961.999	538.477	-161.767	950.495	545.034	-8.80189	922.444	513.005	291.445	694.684	489.4	237.69	734.75	262.541	180.149	751.371	287.179	176.424	756.201	201.778	139.44	733.762	119.93	-290.217	704.884	478.89	-247.667	734.391	250.303	-186.132	754.978	260.895	-192.169	755.169	183.069	-169.898	731.971	96.2685
75	0.74	-1.63235	1116.96	429.79	59.8679	1118.32	472.104	-74.4951	1108.24	464.005	155.469	961.997	538.473	-161.749	950.502	545.035	-8.7641	922.457	512.983	291.455	694.714	489.446	237.682	734.735	262.519	180.149	751.343	287.188	176.434	756.192	201.752	139.467	733.734	119.931	-290.176	704.835	478.84	-247.624	734.435	250.273	-186.057	754.956	260.854	-192.107	755.097	183.017	-169.836	731.957	96.245
76	0.75	-1.61087	1116.97	429.835	59.865	1118.33	472.145	-74.4857	1108.25	464.018	155.458	962.013	538.453	-161.753	950.516	544.992	-8.73952	922.454	512.997	291.449	694.737	489.438	237.682	734.73	262.514	180.153	751.337	287.193	176.438	756.188	201.743	139.47	733.729	119.918	-290.182	704.82	478.846	-247.61	734.459	250.25	-186.019	754.944	260.857	-192.077	755.057	183.007	-169.814	731.94	96.259
77	0.76	-1.64104	1117.02	429.878	59.8523	1118.36	472.155	-74.4882	1108.31	464.014	155.441	962.049	538.434	-161.777	950.572	544.981	-8.74542	922.504	512.992	291.429	694.772	489.414	237.662	734.727	262.516	180.13	751.37	287.179	176.431	756.201	201.721	139.457	733.739	119.917	-290.211	704.834	478.846	-247.615	734.512	250.221	-186.016	754.981	260.85	-192.075	755.05	183.014	-169.822	731.969	96.293
78	0.77	-1.65585	1117.08	429.891	59.8601	1118.41	472.159	-74.4813	1108.35	464.034	155.456	962.081	538.436	-161.786	950.62	544.984	-8.74298	922.546	513.019	291.444	694.8	489.355	237.662	734.734	262.513	180.115	751.384	287.166	176.421	756.222	201.697	139.459	733.758	119.914	-290.191	704.843	478.853	-247.611	734.559	250.219	-185.999	755.028	260.817	-192.053	755.051	183.035	-169.814	732.003	96.2954
79	0.78	-1.65703	1117.11	429.928	59.8865	1118.44	472.233	-74.4616	1108.38	464.079	155.471	962.082	538.444	-161.791	950.635	544.973	-8.72192	922.586	513.033	291.477	694.799	489.378	237.679	734.732	262.538	180.113	751.395	287.171	176.44	756.206	201.728	139.466	733.758	119.921	-290.192	704.86	478.891	-247.593	734.557	250.264	-185.992	755.037	260.831	-192.042	755.046	183.039	-169.805	732.004	96.3255
80	0.79	-1.6628	1117.13	429.943	59.9	1118.46	472.28	-74.4558	1108.4	464.102	155.491	962.084	538.479	-161.795	950.653	544.994	-8.70372	922.656	512.997	291.484	694.76	489.362	237.676	734.735	262.561	180.114	751.396	287.206	176.473	756.179	201.755	139.475	733.759	119.943	-290.215	704.875	478.909	-247.589	734.512	250.284	-186.003	755.035	260.861	-192.044	755.045	183.045	-169.816	732.005	96.3587
81	0.8	-1.65798	1117.17	429.914	59.9	1118.48	472.307	-74.4445	1108.43	464.1	155.5	962.089	538.479	-161.794	950.665	544.972	-8.6694	922.682	512.991	291.471	694.756	489.37	237.674	734.726	262.538	180.114	751.387	287.176	176.499	756.17	201.738	139.494	733.765	119.927	-290.257	704.895	478.91	-247.596	734.462	250.257	-186.004	755.031	260.851	-192.049	755.04	183.038	-169.812	732.015	96.3382
82	0.81	-1.64389	1117.2	429.892	59.91	1118.49	472.308	-74.4343	1108.46	464.095	155.517	962.093	538.451	-161.799	950.674	544.926	-8.64394	922.676	512.989	291.483	694.781	489.403	237.684	734.711	262.541	180.124	751.377	287.147	176.512	756.168	201.726	139.514	733.75	119.908	-290.291	704.919	478.889	-247.597	734.401	250.243	-186.017	755.035	260.828	-192.045	755.011	183.041	-169.792	732.002	96.3295
83	0.82	-1.6476	1117.21	429.917	59.9047	1118.49	472.327	-74.4404	1108.48	464.087	155.514	962.1	538.423	-161.823	950.7	544.914	-8.67255	922.66	513.015	291.475	694.831	489.439	237.681	734.692	262.562	180.12	751.357	287.155	176.494	756.161	201.711	139.506	733.746	119.894	-290.343	704.927	478.911	-247.622	734.337	250.263	-186.075	755.052	260.847	-192.061	754.975	183.082	-169.814	731.988	96.3443
84	0.83	-1.67717	1117.25	429.94	59.8892	1118.52	472.389	-74.4624	1108.52	464.113	155.489	962.126	538.458	-161.876	950.728	544.914	-8.7261	922.698	513.065	291.419	694.849	489.488	237.647	734.688	262.576	180.082	751.349	287.192	176.461	756.162	201.745	139.476	733.745	119.91	-290.422	704.937	478.911	-247.676	734.264	250.318	-186.178	755.076	260.906	-192.119	754.974	183.129	-169.879	731.99	96.3977
85	0.84	-1.71058	1117.28	430.018	59.8671	1118.54	472.428	-74.4955	1108.55	464.169	155.453	962.16	538.458	-161.93	950.762	544.901	-8.76927	922.758	513.029	291.374	694.865	489.51	237.627	734.689	262.57	180.054	751.343	287.209	176.443	756.167	201.74	139.47	733.753	119.929	-290.493	704.959	478.894	-247.714	734.215	250.321	-186.268	755.093	260.961	-192.183	755.011	183.131	-169.926	732.004	96.4258
86	0.85	-1.70384	1117.29	430.022	59.8594	1118.55	472.405	-74.4748	1108.55	464.184	155.449	962.164	538.42	-161.935	950.77	544.868	-8.76523	922.779	512.947	291.374	694.808	489.476	237.636	734.672	262.56	180.064	751.334	287.195	176.446	756.16	201.704	139.49	733.74	119.917	-290.541	705.018	478.91	-247.701	734.161	250.291	-186.283	755.092	260.947	-192.183	755.039	183.114	-169.92	732.016	96.4043
87	0.86	-1.66067	1117.28	430.042	59.882	1118.55	472.415	-74.4194	1108.55	464.157	155.477	962.164	538.419	-161.91	950.783	544.851	-8.72684	922.786	512.944	291.377	694.711	489.412	237.666	734.655	262.576	180.111	751.316	287.222	176.503	756.113	201.733	139.523	733.711	119.921	-290.57	705.085	478.929	-247.676	734.118	250.281	-186.253	755.063	260.952	-192.157	755.085	183.097	-169.904	732.009	96.396
88	0.87	-1.63154	1117.3	430.064	59.9164	1118.57	472.464	-74.3823	1108.54	464.173	155.51	962.175	538.42	-161.909	950.81	544.835	-8.69461	922.835	512.975	291.39	694.68	489.39	237.689	734.664	262.59	180.154	751.313	287.252	176.554	756.098	201.754	139.531	733.71	119.929	-290.616	705.146	478.963	-247.674	734.091	250.277	-186.252	755.044	260.976	-192.173	755.145	183.101	-169.909	732.012	96.4053
89	0.88	-1.6625	1117.33	430.055	59.9148	1118.59	472.449	-74.3941	1108.56	464.137	155.495	962.204	538.401	-161.949	950.834	544.791	-8.72143	922.883	512.962	291.37	694.692	489.417	237.677	734.668	262.585	180.13	751.33	287.231	176.546	756.104	201.767	139.512	733.73	119.952	-290.67	705.188	478.928	-247.71	734.043	250.282	-186.312	755.054	260.978	-192.202	755.174	183.09	-169.962	732.036	96.4083
90	0.89	-1.69633	1117.36	430.031	59.896	1118.61	472.441	-74.4415	1108.59	464.153	155.477	962.226	538.397	-161.982	950.861	544.797	-8.76206	922.928	512.908	291.308	694.735	489.478	237.64	734.668	262.564	180.07	751.331	287.197	176.501	756.119	201.747	139.486	733.734	119.949	-290.721	705.177	478.904	-247.742	733.994	250.302	-186.373	755.052	261	-192.228	755.164	183.128	-170.002	732.042	96.4238
91	0.9	-1.69641	1117.36	430.031	59.8983	1118.62	472.483	-74.4538	1108.62	464.173	155.461	962.234	538.4	-161.989	950.883	544.826	-8.76324	922.944	512.953	291.278	694.791	489.584	237.616	734.649	262.567	180.037	751.311	287.194	176.473	756.121	201.736	139.477	733.727	119.94	-290.786	705.174	478.949	-247.758	733.93	250.32	-186.411	755.032	261.025	-192.231	755.133	183.157	-170.017	732.028	96.4484
92	0.91	-1.68401	1117.34	430.044	59.8882	1118.63	472.499	-74.4572	1108.63	464.166	155.45	962.229	538.399	-162.006	950.895	544.782	-8.77761	922.947	512.949	291.249	694.852	489.691	237.602	734.633	262.573	180.012	751.286	287.168	176.452	756.11	201.713	139.449	733.722	119.921	-290.817	705.158	478.916	-247.776	733.868	250.32	-186.452	755.004	261.012	-192.255	755.097	183.164	-170.036	732.005	96.4522
93	0.92	-1.68163	1117.36	430.029	59.8892	1118.65	472.479	-74.4629	1108.67	464.138	155.44	962.263	538.392	-162.027	950.927	544.709	-8.79851	922.999	512.921	291.226	694.876	489.683	237.592	734.643	262.556	179.998	751.305	287.145	176.422	756.124	201.682	139.447	733.744	119.894	-290.833	705.168	478.851	-247.78	733.84	250.267	-186.472	755.024	261.019	-192.283	755.106	183.164	-170.052	732.009	96.437
94	0.93	-1.65049	1117.41	430.03	59.9147	1118.68	472.48	-74.4181	1108.71	464.142	155.441	962.298	538.382	-162.017	950.965	544.713	-8.76712	923.049	512.916	291.219	694.858	489.656	237.605	734.676	262.545	180.038	751.34	287.166	176.434	756.158	201.663	139.474	733.757	119.898	-290.82	705.191	478.835	-247.754	733.86	250.264	-186.469	755.08	261.05	-192.268	755.146	183.171	-170.042	732.035	96.4417
95	0.94	-1.58469	1117.43	430.026	59.9668	1118.67	472.528	-74.3264	1108.71	464.16	155.459	962.31	538.373	-161.99	950.987	544.765	-8.71011	923.092	512.913	291.225	694.79	489.617	237.64	734.701	262.565	180.098	751.346	287.205	176.483	756.158	201.666	139.488	733.747	119.902	-290.811	705.249	478.906	-247.733	733.846	250.299	-186.442	755.119	261.038	-192.238	755.185	183.166	-170.012	732.047	96.4225
96	0.95	-1.50617	1117.44	430.037	60.0221	1118.66	472.544	-74.2585	1108.71	464.142	155.495	962.316	538.391	-161.974	950.992	544.747	-8.66765	923.138	512.875	291.219	694.686	489.53	237.67	734.694	262.581	180.13	751.348	287.215	176.538	756.147	201.669	139.509	733.754	119.902	-290.802	705.323	478.941	-247.724	733.827	250.269	-186.415	755.164	261.01	-192.229	755.227	183.128	-169.989	732.039	96.3995
97	0.96	-1.44629	1117.43	430.022	60.0613	1118.65	472.542	-74.0207	1108.72	464.181	155.515	962.315	538.405	-161.982	951.005	544.722	-8.64988	923.164	512.841	291.217	694.654	489.531	237.679	734.684	262.581	180.137	751.34	287.222	176.561	756.119	201.7	139.52	733.755	119.889	-290.783	705.343	478.974	-247.72	733.813	250.258	-186.41	755.222	260.963	-192.233	755.253	183.073	-169.974	732.035	96.4135
98	0.97	-1.43455	1117.41	430.035	60.0973	1118.62	472.576	-73.5829	1108.73	464.322	155.507	962.309	538.415	-162.001	951.018	544.719	-8.68232	923.147	512.857	291.222	694.629	489.545	237.657	734.671	262.561	180.11	751.318	287.209	176.567	756.078	201.732	139.512	733.735	119.895	-290.8	705.314	478.947	-247.731	733.782	250.274	-186.432	755.26	260.965	-192.258	755.208	183.088	-169.982	732.022	96.4362
99	0.98	-1.44414	1117.42	430.018	60.1183	1118.6	472.608	-73.4838	1108.75	464.372	155.493	962.3	538.386	-162.019	951.024	544.706	-8.7313	923.137	512.842	291.198	694.656	489.577	237.619	734.66	262.555	180.068	751.29	287.215	176.53	756.078	201.722	139.488	733.719	119.914	-290.82	705.274	478.906	-247.761	733.746	250.278	-186.488	755.255	261.019	-192.278	755.149	183.142	-170.018	732.016	96.4421
100	0.99	-1.42122	1117.39	430.049	60.1408	1118.59	472.608	-73.4503	1108.75	464.391	155.495	962.297	538.384	-162.036	951.03	544.746	-8.74751	923.156	512.839	291.16	694.708	489.658	237.6	734.661	262.548	180.041	751.273	287.232	176.509	756.076	201.734	139.462	733.71	119.949	-290.839	705.252	478.926	-247.8	733.707	250.276	-186.536	755.258	261.032	-192.313	755.095	183.148	-170.051	732.006	96.452
101	1	-1.37665	1117.39	430.069	60.1783	1118.59	472.619	-73.4336	1108.77	464.4	155.498	962.309	538.39	-162.051	951.043	544.736	-8.75927	923.202	512.817	291.136	694.784	489.737	237.597	734.668	262.54	180.018	751.271	287.2	176.495	756.079	201.739	139.456	733.713	119.951	-290.86	705.243	478.903	-247.814	733.696	250.29	-186.581	755.299	261.05	-192.36	755.057	183.112	-170.079	732.007	96.4686
102	1.01	-1.33187	1117.44	429.98	60.2306	1118.6	472.646	-73.3741	1108.81	464.366	155.509	962.321	538.401	-162.066	951.078	544.731	-8.75817	923.264	512.763	291.113	694.802	489.757	237.605	734.664	262.534	180.018	751.287	287.144	176.484	756.094	201.721	139.476	733.725	119.922	-290.861	705.246	478.903	-247.81	733.717	250.25	-186.575	755.339	261.053	-192.368	755.02	183.11	-170.085	732.003	96.4877
103	1.02	-1.23473	1117.46	429.919	60.2947	1118.61	472.64	-73.2709	1108.84	464.333	155.539	962.339	538.374	-162.042	951.097	544.716	-8.70896	923.307	512.674	291.112	694.797	489.77	237.622	734.655	262.535	180.055	751.302	287.104	176.499	756.098	201.701	139.527	733.732	119.929	-290.831	705.266	478.951	-247.788	733.754	250.211	-186.517	755.377	261.016	-192.341	754.987	183.082	-170.061	732.003	96.4711
104	1.03	-1.10315	1117.47	429.935	60.3657	1118.62	472.684	-73.1738	1108.85	464.337	155.571	962.353	538.34	-162.018	951.105	544.696	-8.65267	923.368	512.634	291.148	694.754	489.719	237.656	734.664	262.541	180.105	751.303	287.137	176.538	756.11	201.694	139.539	733.731	119.921	-290.786	705.279	478.924	-247.75	733.759	250.183	-186.476	755.417	260.989	-192.334	754.99	183.006	-170.044	732	96.445
105	1.04	-1.06302	1117.5	429.998	60.4016	1118.62	472.743	-73.1351	1108.87	464.377	155.566	962.382	538.386	-162.03	951.122	544.713	-8.66453	923.418	512.661	291.16	694.72	489.666	237.647	734.68	262.547	180.106	751.309	287.189	176.538	756.115	201.709	139.507	733.732	119.938	-290.764	705.278	478.95	-247.768	733.783	250.215	-186.501	755.458	261.034	-192.357	754.997	183.017	-170.074	731.994	96.4754
106	1.05	-1.02881	1117.47	430.073	60.434	1118.6	472.777	-73.1085	1108.87	464.386	155.555	962.389	538.405	-162.052	951.13	544.722	-8.69595	923.438	512.673	291.165	694.708	489.636	237.631	734.673	262.548	180.063	751.292	287.186	176.513	756.101	201.701	139.473	733.735	119.942	-290.76	705.268	478.96	-247.786	733.79	250.255	-186.53	755.479	261.081	-192.395	754.969	183.058	-170.096	731.99	96.4912
107	1.06	-0.93663	1117.4	430.156	60.5143	1118.57	472.834	-73.0269	1108.84	464.403	155.584	962.367	538.402	-162.021	951.119	544.726	-8.66117	923.393	512.733	291.18	694.684	489.601	237.64	734.635	262.532	180.075	751.259	287.174	176.525	756.063	201.693	139.487	733.706	119.921	-290.713	705.219	478.893	-247.755	733.781	250.214	-186.492	755.469	261.064	-192.37	754.899	183.033	-170.07	731.958	96.4744
108	1.07	-0.83851	1117.34	430.256	60.5792	1118.54	472.897	-72.9374	1108.81	464.437	155.616	962.361	538.412	-161.989	951.115	544.731	-8.62263	923.359	512.791	291.192	694.633	489.577	237.647	734.613	262.532	180.12	751.219	287.212	176.562	756.015	201.73	139.509	733.685	119.912	-290.703	705.198	478.866	-247.715	733.771	250.188	-186.454	755.442	261.042	-192.343	754.856	182.99	-170.04	731.929	96.4559
109	1.08	-0.78897	1117.33	430.328	60.6248	1118.55	472.933	-72.9105	1108.83	464.436	155.618	962.376	538.408	-162.001	951.123	544.74	-8.62428	923.373	512.829	291.193	694.654	489.593	237.651	734.612	262.558	180.109	751.221	287.238	176.56	756.023	201.758	139.5	733.695	119.93	-290.742	705.208	478.888	-247.718	733.774	250.175	-186.464	755.456	261.067	-192.358	754.83	182.996	-170.061	731.919	96.4719
110	1.09	-0.73793	1117.41	430.236	60.6788	1118.56	472.989	-72.8774	1108.9	464.408	155.628	962.423	538.399	-162.013	951.163	544.73	-8.61081	923.438	512.812	291.183	694.712	489.63	237.65	734.641	262.563	180.092	751.269	287.206	176.542	756.052	201.744	139.496	733.718	119.932	-290.738	705.225	478.902	-247.722	733.797	250.176	-186.459	755.513	261.044	-192.36	754.808	183.006	-170.062	731.94	96.4668
111	1.1	-0.65217	1117.5	430.108	60.7338	1118.59	473.006	-72.8157	1108.94	464.341	155.657	962.455	538.396	-162.002	951.184	544.694	-8.59085	923.52	512.684	291.169	694.742	489.644	237.682	734.682	262.542	180.102	751.319	287.147	176.562	756.083	201.693	139.515	733.743	119.899	-290.695	705.251	478.879	-247.698	733.818	250.14	-186.429	755.559	261.021	-192.336	754.775	182.967	-170.052	731.943	96.4526
112	1.11	-0.6108	1117.52	430.08	60.7579	1118.61	473.001	-72.7741	1108.96	464.322	155.681	962.477	538.428	-161.997	951.205	544.686	-8.57848	923.575	512.632	291.163	694.774	489.647	237.662	734.703	262.517	180.095	751.335	287.132	176.563	756.112	201.667	139.524	733.766	119.848	-290.686	705.271	478.896	-247.698	733.819	250.153	-186.433	755.597	261.059	-192.348	754.721	182.964	-170.059	731.957	96.4758
113	1.12	-0.57436	1117.57	430.075	60.779	1118.61	473.027	-72.9597	1108.98	464.23	155.68	962.5	538.434	-162.01	951.23	544.698	-8.58049	923.636	512.576	291.147	694.798	489.644	237.637	734.715	262.534	180.061	751.373	287.114	176.556	756.107	201.661	139.51	733.78	119.849	-290.718	705.291	478.958	-247.72	733.836	250.174	-186.46	755.658	261.091	-192.381	754.664	182.989	-170.094	731.964	96.5095
114	1.13	-0.51413	1117.58	430.077	60.8232	1118.6	473.079	-73.3539	1108.98	464.067	155.681	962.498	538.432	-161.995	951.243	544.67	-8.5778	923.671	512.517	291.15	694.84	489.69	237.64	734.719	262.551	180.047	751.365	287.088	176.571	756.074	201.666	139.5	733.77	119.843	-290.701	705.273	478.892	-247.72	733.837	250.123	-186.466	755.703	261.059	-192.4	754.609	182.934	-170.119	731.955	96.4999
115	1.14	-0.45576	1117.52	430.184	60.8565	1118.58	473.101	-73.398	1108.96	464.046	155.697	962.485	538.427	-161.97	951.243	544.67	-8.56589	923.651	512.592	291.183	694.804	489.647	237.635	734.705	262.553	180.055	751.329	287.149	176.58	756.016	201.66	139.512	733.73	119.88	-290.658	705.243	478.842	-247.704	733.814	250.097	-186.447	755.744	261.056	-192.417	754.547	182.889	-170.111	731.917	96.5149
116	1.15	-0.42175	1117.44	430.364	60.8812	1118.57	473.173	-73.3815	1108.93	464.098	155.702	962.472	538.439	-161.97	951.25	544.719	-8.56612	923.608	512.737	291.209	694.726	489.559	237.632	734.684	262.59	180.046	751.3	287.253	176.613	755.942	201.694	139.496	733.698	119.915	-290.673	705.247	478.898	-247.701	733.801	250.114	-186.458	755.805	261.1	-192.457	754.468	182.842	-170.126	731.879	96.5519
117	1.16	-0.36997	1117.42	430.431	60.9151	1118.58	473.202	-73.3756	1108.93	464.095	155.715	962.476	538.457	-161.967	951.263	544.715	-8.5648	923.606	512.809	291.195	694.68	489.537	237.627	734.684	262.622	180.028	751.299	287.275	176.643	755.9	201.721	139.479	733.681	119.906	-290.682	705.234	478.864	-247.702	733.804	250.107	-186.467	755.902	261.102	-192.484	754.372	182.791	-170.166	731.857	96.5523
118	1.17	-0.32443	1117.48	430.277	60.9525	1118.57	473.172	-73.353	1108.95	464.064	155.717	962.485	538.429	-161.964	951.278	544.695	-8.5453	923.657	512.728	291.162	694.684	489.541	237.62	734.723	262.618	180.015	751.346	287.221	176.676	755.871	201.673	139.49	733.68	119.876	-290.656	705.214	478.786	-247.671	733.84	250.043	-186.422	756.013	261.052	-192.49	754.241	182.684	-170.198	731.851	96.5333
119	1.18	-0.28568	1117.51	430.196	60.9719	1118.56	473.173	-73.3241	1108.97	464.061	155.713	962.5	538.398	-161.98	951.285	544.705	-8.53884	923.7	512.657	291.127	694.707	489.554	237.623	734.749	262.616	180.007	751.386	287.214	176.698	755.827	201.606	139.499	733.679	119.848	-290.641	705.225	478.805	-247.598	733.88	249.99	-186.359	756.13	261.066	-192.491	754.074	182.633	-170.221	731.843	96.5577
120	1.19	-0.26347	1117.5	430.232	60.9918	1118.55	473.193	-73.2997	1108.98	464.052	155.715	962.508	538.397	-161.999	951.272	544.699	-8.53556	923.725	512.658	291.1	694.735	489.586	237.623	734.764	262.626	179.987	751.425	287.227	176.726	755.775	201.593	139.503	733.666	119.857	-290.608	705.217	478.799	-247.532	733.921	249.939	-186.309	756.251	261.078	-192.509	753.902	182.559	-170.256	731.822	96.5921
121	1.2	-0.2554	1117.51	430.25	60.9952	1118.55	473.19	-73.2962	1109	464.033	155.712	962.534	538.403	-162.042	951.279	544.671	-8.56789	923.762	512.626	291.077	694.761	489.634	237.585	734.798	262.649	179.941	751.472	287.203	176.742	755.736	201.569	139.473	733.684	119.839	-290.571	705.194	478.754	-247.502	733.985	249.907	-186.263	756.397	261.019	-192.546	753.728	182.493	-170.301	731.816	96.6138
122	1.21	-0.29165	1117.56	430.222	60.9635	1118.56	473.18	-73.319	1109.02	464.064	155.686	962.57	538.435	-162.103	951.299	544.671	-8.63786	923.834	512.541	291.028	694.792	489.667	237.549	734.832	262.681	179.882	751.52	287.203	176.73	755.709	201.533	139.452	733.699	119.822	-290.515	705.137	478.686	-247.476	734.053	249.872	-186.249	756.543	260.998	-192.573	753.526	182.464	-170.364	731.812	96.6521
123	1.22	-0.31175	1117.55	430.281	60.9559	1118.56	473.222	-73.348	1109.02	464.113	155.663	962.593	538.458	-162.142	951.302	544.696	-8.67793	923.85	512.534	290.982	694.805	489.7	237.532	734.845	262.709	179.83	751.549	287.203	176.728	755.654	201.507	139.436	733.691	119.814	-290.48	705.105	478.668	-247.412	734.099	249.835	-186.202	756.649	261.029	-192.581	753.303	182.471	-170.396	731.785	96.6988
124	1.23	-0.28089	1117.52	430.335	60.9626	1118.56	473.264	-73.3374	1109	464.097	155.65	962.606	538.446	-162.145	951.29	544.682	-8.65522	923.82	512.567	290.945	694.798	489.716	237.534	734.852	262.701	179.828	751.56	287.213	176.751	755.579	201.478	139.457	733.652	119.795	-290.433	705.079	478.641	-247.294	734.161	249.73	-186.106	756.743	261.006	-192.548	753.093	182.404	-170.401	731.765	96.6948
125	1.24	-0.26565	1117.52	430.35	60.9677	1118.56	473.279	-73.3366	1108.99	464.096	155.64	962.625	538.46	-162.153	951.304	544.681	-8.65393	923.816	512.59	290.907	694.8	489.714	237.525	734.883	262.691	179.81	751.584	287.209	176.789	755.527	201.489	139.475	733.647	119.772	-290.382	705.061	478.593	-247.183	734.242	249.639	-185.986	756.849	260.974	-192.521	752.919	182.297	-170.422	731.773	96.7262
126	1.25	-0.30997	1117.53	430.37	60.9337	1118.55	473.247	-73.3765	1108.99	464.1	155.619	962.657	538.469	-162.183	951.32	544.685	-8.69763	923.836	512.596	290.87	694.797	489.692	237.501	734.899	262.698	179.778	751.606	287.207	176.803	755.485	201.502	139.461	733.654	119.779	-290.355	705.041	478.534	-247.11	734.342	249.557	-185.877	756.957	260.954	-192.509	752.734	182.228	-170.448	731.784	96.761
127	1.26	-0.3428	1117.52	430.416	60.9072	1118.56	473.244	-73.3925	1108.98	464.078	155.601	962.672	538.446	-162.198	951.331	544.685	-8.72195	923.845	512.573	290.835	694.782	489.699	237.502	734.905	262.722	179.777	751.609	287.24	176.819	755.431	201.476	139.471	733.637	119.762	-290.302	705.02	478.485	-247.035	734.429	249.486	-185.782	757.043	260.926	-192.466	752.565	182.158	-170.445	731.773	96.774
128	1.27	-0.35111	1117.5	430.432	60.8947	1118.57	473.252	-73.3967	1108.96	464.057	155.59	962.675	538.402	-162.193	951.321	544.652	-8.7227	923.842	512.559	290.83	694.776	489.725	237.52	734.897	262.735	179.788	751.599	287.266	176.847	755.38	201.452	139.491	733.638	119.735	-290.237	704.991	478.407	-246.932	734.515	249.385	-185.664	757.116	260.885	-192.411	752.458	182.042	-170.405	731.772	96.7282
129	1.28	-0.40127	1117.51	430.386	60.8613	1118.57	473.257	-73.2353	1108.94	464.105	155.565	962.704	538.388	-162.219	951.306	544.597	-8.76078	923.857	512.505	290.805	694.794	489.73	237.517	734.904	262.726	179.756	751.611	287.232	176.85	755.359	201.452	139.493	733.639	119.723	-290.196	704.984	478.339	-246.861	734.595	249.306	-185.588	757.203	260.854	-192.384	752.347	181.953	-170.404	731.784	96.7367
130	1.29	-0.50249	1117.52	430.331	60.8037	1118.58	473.241	-72.8648	1108.92	464.238	155.521	962.748	538.38	-162.27	951.305	544.584	-8.82782	923.884	512.479	290.759	694.813	489.741	237.485	734.92	262.719	179.715	751.64	287.209	176.836	755.333	201.463	139.483	733.64	119.727	-290.183	704.965	478.321	-246.833	734.682	249.259	-185.544	757.297	260.82	-192.379	752.266	181.913	-170.426	731.798	96.7675
131	1.3	-0.57591	1117.53	430.239	60.7335	1118.59	473.158	-72.8195	1108.92	464.231	155.492	962.782	538.36	-162.312	951.297	544.561	-8.8725	923.917	512.383	290.72	694.838	489.757	237.479	734.917	262.689	179.691	751.654	287.182	176.821	755.32	201.435	139.481	733.631	119.684	-290.163	704.93	478.295	-246.796	734.761	249.218	-185.481	757.362	260.809	-192.351	752.206	181.887	-170.407	731.792	96.7677
132	1.31	-0.64408	1117.52	430.202	60.667	1118.59	473.104	-72.8554	1108.89	464.214	155.459	962.792	538.337	-162.329	951.295	544.555	-8.89929	923.932	512.322	290.686	694.856	489.773	237.48	734.897	262.678	179.697	751.654	287.176	176.825	755.311	201.415	139.49	733.63	119.653	-290.153	704.908	478.231	-246.761	734.804	249.174	-185.425	757.416	260.803	-192.336	752.149	181.828	-170.392	731.782	96.7596
133	1.32	-0.7654	1117.49	430.254	60.5986	1118.59	473.112	-72.9329	1108.84	464.278	155.422	962.805	538.33	-162.359	951.285	544.565	-8.93952	923.946	512.325	290.659	694.861	489.777	237.463	734.884	262.708	179.687	751.626	287.209	176.816	755.309	201.418	139.473	733.611	119.657	-290.168	704.875	478.211	-246.76	734.834	249.175	-185.415	757.464	260.818	-192.354	752.109	181.813	-170.396	731.795	96.794
134	1.33	-0.88418	1117.47	430.269	60.5046	1118.6	473.095	-73.0356	1108.8	464.305	155.396	962.842	538.322	-162.397	951.283	544.592	-8.98273	923.965	512.361	290.637	694.885	489.782	237.435	734.878	262.714	179.675	751.615	287.215	176.787	755.316	201.377	139.458	733.615	119.676	-290.199	704.868	478.211	-246.767	734.875	249.192	-185.419	757.506	260.867	-192.364	752.067	181.85	-170.404	731.809	96.8386
135	1.34	-0.9506	1117.46	430.239	60.4215	1118.6	472.997	-73.1052	1108.76	464.285	155.384	962.862	538.304	-162.411	951.286	544.589	-9.00218	923.992	512.295	290.623	694.908	489.825	237.439	734.865	262.682	179.678	751.619	287.178	176.797	755.298	201.382	139.471	733.621	119.688	-290.195	704.899	478.196	-246.735	734.896	249.172	-185.381	757.551	260.861	-192.34	752.009	181.854	-170.377	731.805	96.8471
136	1.35	-1.01273	1117.43	430.246	60.3754	1118.6	472.98	-73.1528	1108.72	464.3	155.384	962.878	538.297	-162.417	951.285	544.566	-9.00437	923.998	512.253	290.622	694.911	489.846	237.468	734.835	262.694	179.697	751.596	287.208	176.815	755.277	201.419	139.495	733.593	119.709	-290.196	704.919	478.182	-246.699	734.919	249.172	-185.336	757.559	260.862	-192.312	751.99	181.797	-170.347	731.802	96.8334
137	1.36	-1.09035	1117.41	430.308	60.3096	1118.61	472.962	-73.2374	1108.68	464.352	155.377	962.901	538.303	-162.433	951.306	544.615	-9.00719	923.981	512.338	290.61	694.915	489.867	237.476	734.831	262.717	179.7	751.599	287.237	176.827	755.269	201.474	139.508	733.6	119.728	-290.233	704.92	478.161	-246.705	734.917	249.205	-185.316	757.553	260.905	-192.311	751.996	181.804	-170.335	731.81	96.8366
138	1.37	-1.20511	1117.45	430.234	60.2065	1118.63	472.896	-73.5176	1108.69	464.272	155.372	962.912	538.321	-162.457	951.308	544.605	-9.03677	924.027	512.267	290.568	694.91	489.894	237.477	734.839	262.709	179.716	751.61	287.241	176.821	755.271	201.46	139.499	733.617	119.721	-290.268	704.939	478.185	-246.709	734.912	249.223	-185.32	757.566	260.878	-192.293	751.986	181.86	-170.328	731.826	96.8573
139	1.38	-1.31102	1117.48	430.104	60.1296	1118.65	472.817	-73.8325	1108.67	464.177	155.374	962.918	538.309	-162.471	951.304	544.556	-9.05794	924.062	512.132	290.552	694.906	489.882	237.482	734.831	262.67	179.725	751.61	287.173	176.834	755.276	201.432	139.505	733.627	119.695	-290.293	704.986	478.188	-246.691	734.899	249.192	-185.308	757.549	260.837	-192.251	751.966	181.877	-170.303	731.837	96.829
140	1.39	-1.39741	1117.45	430.111	60.0713	1118.64	472.807	-73.7544	1108.63	464.235	155.37	962.92	538.264	-162.495	951.31	544.559	-9.06135	924.046	512.145	290.548	694.923	489.889	237.497	734.8	262.67	179.746	751.585	287.178	176.849	755.268	201.42	139.521	733.625	119.684	-290.344	705.024	478.19	-246.685	734.848	249.191	-185.309	757.494	260.89	-192.245	751.953	181.85	-170.28	731.837	96.8297
141	1.4	-1.49667	1117.44	430.196	59.9787	1118.66	472.807	-74.1755	1108.63	464.152	155.351	962.936	538.28	-162.532	951.32	544.595	-9.09156	924.028	512.209	290.53	694.931	489.907	237.495	734.802	262.703	179.745	751.571	287.187	176.836	755.281	201.45	139.507	733.619	119.702	-290.419	705.076	478.21	-246.699	734.802	249.241	-185.338	757.443	260.934	-192.262	751.963	181.881	-170.292	731.839	96.8863
142	1.41	-1.57342	1117.47	430.187	59.8871	1118.7	472.777	-74.3407	1108.64	464.144	155.324	962.969	538.282	-162.563	951.356	544.614	-9.11293	924.039	512.198	290.493	694.936	489.904	237.479	734.806	262.711	179.735	751.589	287.167	176.812	755.311	201.433	139.497	733.641	119.7	-290.498	705.117	478.211	-246.719	734.747	249.258	-185.352	757.41	260.938	-192.238	751.986	181.964	-170.301	731.858	96.9098
143	1.42	-1.64364	1117.48	430.159	59.8252	1118.71	472.743	-74.4205	1108.62	464.145	155.312	962.967	538.269	-162.585	951.375	544.6	-9.12016	924.027	512.179	290.472	694.929	489.91	237.48	734.799	262.664	179.749	751.589	287.143	176.789	755.331	201.384	139.515	733.648	119.696	-290.572	705.144	478.218	-246.711	734.663	249.252	-185.357	757.351	260.913	-192.213	751.979	181.985	-170.29	731.866	96.8999
144	1.43	-1.70524	1117.45	430.189	59.7754	1118.72	472.723	-74.4829	1108.6	464.136	155.311	962.953	538.257	-162.601	951.385	544.603	-9.12299	924	512.141	290.461	694.939	489.906	237.496	734.771	262.64	179.757	751.566	287.135	176.77	755.322	201.386	139.502	733.634	119.673	-290.667	705.159	478.244	-246.723	734.576	249.27	-185.377	757.264	260.956	-192.205	751.944	181.981	-170.284	731.863	96.9129
145	1.44	-1.79282	1117.46	430.232	59.7226	1118.73	472.714	-74.5457	1108.6	464.146	155.286	962.955	538.252	-162.624	951.399	544.616	-9.1519	924.001	512.112	290.463	694.934	489.882	237.48	734.755	262.613	179.732	751.558	287.128	176.751	755.33	201.414	139.467	733.639	119.67	-290.76	705.214	478.288	-246.758	734.508	249.303	-185.437	757.192	260.963	-192.213	751.931	181.999	-170.288	731.864	96.9307
146	1.45	-1.86784	1117.47	430.232	59.6624	1118.75	472.678	-74.6162	1108.6	464.2	155.267	962.964	538.244	-162.644	951.414	544.625	-9.19862	923.998	512.054	290.463	694.909	489.872	237.465	734.754	262.619	179.716	751.555	287.121	176.727	755.343	201.401	139.427	733.651	119.672	-290.799	705.267	478.258	-246.796	734.457	249.301	-185.49	757.145	260.954	-192.233	751.949	182.02	-170.299	731.865	96.9462
147	1.46	-1.90109	1117.48	430.27	59.6378	1118.77	472.673	-74.6549	1108.57	464.255	155.268	962.971	538.242	-162.651	951.422	544.613	-9.20812	923.981	512.048	290.462	694.88	489.878	237.47	734.738	262.658	179.725	751.538	287.112	176.721	755.332	201.424	139.418	733.657	119.683	-290.839	705.325	478.288	-246.817	734.412	249.335	-185.53	757.089	261.007	-192.242	751.958	182.062	-170.306	731.878	96.9601
148	1.47	-1.89273	1117.48	430.315	59.6489	1118.76	472.714	-74.6397	1108.54	464.288	155.287	962.967	538.256	-162.637	951.442	544.65	-9.16142	923.952	512.142	290.483	694.839	489.894	237.491	734.728	262.657	179.767	751.503	287.173	176.74	755.321	201.461	139.448	733.646	119.724	-290.882	705.387	478.36	-246.799	734.336	249.368	-185.52	757.044	261.03	-192.207	751.963	182.098	-170.278	731.881	96.979
149	1.48	-1.86842	1117.48	430.276	59.6721	1118.77	472.718	-74.5988	1108.54	464.238	155.32	962.958	538.255	-162.608	951.459	544.651	-9.10384	923.969	512.074	290.471	694.78	489.887	237.516	734.738	262.635	179.826	751.507	287.169	176.749	755.348	201.462	139.472	733.65	119.738	-290.911	705.443	478.444	-246.776	734.276	249.379	-185.473	757.025	261.007	-192.158	751.987	182.062	-170.241	731.882	96.9645
150	1.49	-1.8569	1117.5	430.226	59.6575	1118.82	472.677	-74.587	1108.58	464.185	155.332	962.978	538.208	-162.594	951.508	544.596	-9.08468	924.031	511.882	290.416	694.81	489.918	237.524	734.755	262.605	179.849	751.541	287.104	176.745	755.396	201.439	139.478	733.681	119.705	-290.935	705.473	478.455	-246.768	734.259	249.369	-185.453	757.018	260.976	-192.115	751.99	182.063	-170.228	731.907	96.9629
151	1.5	-1.86684	1117.54	430.212	59.6287	1118.86	472.663	-74.6093	1108.62	464.189	155.318	962.992	538.212	-162.604	951.572	544.591	-9.12281	924.066	511.851	290.37	694.871	489.969	237.503	734.782	262.581	179.825	751.565	287.089	176.685	755.444	201.413	139.457	733.714	119.698	-290.973	705.501	478.439	-246.792	734.262	249.364	-185.491	757.02	260.973	-192.106	751.985	182.105	-170.232	731.939	96.9854
152	1.51	-1.88404	1117.53	430.221	59.6104	1118.86	472.645	-74.6471	1108.65	464.17	155.306	962.975	538.217	-162.623	951.608	544.601	-9.15083	924.05	511.893	290.341	694.913	489.989	237.467	734.794	262.57	179.787	751.549	287.103	176.616	755.465	201.376	139.427	733.71	119.711	-291.021	705.494	478.403	-246.839	734.232	249.39	-185.54	756.989	260.994	-192.13	751.957	182.155	-170.26	731.927	96.9981
153	1.52	-1.89338	1117.49	430.25	59.6135	1118.83	472.623	-74.6739	1108.64	464.193	155.292	962.937	538.213	-162.634	951.591	544.585	-9.19339	924.001	511.878	290.336	694.879	489.99	237.441	734.782	262.568	179.746	751.513	287.116	176.574	755.453	201.371	139.407	733.694	119.703	-291.057	705.452	478.337	-246.867	734.189	249.406	-185.591	756.957	260.989	-192.153	751.923	182.156	-170.276	731.912	96.9796
154	1.53	-1.88195	1117.48	430.274	59.6384	1118.78	472.661	-74.6733	1108.61	464.22	155.286	962.906	538.24	-162.643	951.553	544.596	-9.20791	923.929	511.937	290.35	694.801	489.969	237.428	734.753	262.616	179.741	751.466	287.15	176.574	755.424	201.443	139.392	733.667	119.746	-291.094	705.437	478.343	-246.89	734.143	249.446	-185.62	756.919	261.039	-192.172	751.923	182.176	-170.288	731.896	97.0089
155	1.54	-1.83254	1117.46	430.316	59.7231	1118.73	472.719	-74.6086	1108.58	464.228	155.303	962.882	538.259	-162.61	951.525	544.561	-9.17835	923.871	511.993	290.405	694.72	489.92	237.455	734.717	262.651	179.779	751.427	287.177	176.611	755.386	201.558	139.409	733.629	119.782	-291.121	705.464	478.384	-246.883	734.094	249.455	-185.6	756.86	261.071	-192.163	751.914	182.209	-170.275	731.866	97.02
156	1.55	-1.73419	1117.45	430.244	59.8284	1118.7	472.743	-74.4829	1108.56	464.187	155.356	962.868	538.223	-162.538	951.513	544.503	-9.10636	923.837	511.989	290.467	694.634	489.836	237.515	734.699	262.635	179.873	751.408	287.215	176.662	755.381	201.577	139.462	733.634	119.767	-291.1	705.539	478.408	-246.814	734.072	249.399	-185.53	756.824	261.043	-192.093	751.916	182.186	-170.216	731.85	96.9702
157	1.56	-1.62784	1117.47	430.199	59.9002	1118.7	472.745	-74.375	1108.58	464.15	155.393	962.872	538.213	-162.478	951.531	544.477	-9.02319	923.83	511.998	290.496	694.556	489.775	237.557	734.712	262.619	179.933	751.412	287.223	176.69	755.397	201.563	139.498	733.649	119.77	-291.053	705.612	478.41	-246.75	734.074	249.367	-185.487	756.833	261.03	-192.046	751.955	182.123	-170.169	731.863	96.9263
158	1.57	-1.58229	1117.52	430.163	59.9256	1118.72	472.747	-74.3497	1108.62	464.139	155.384	962.898	538.232	-162.482	951.578	544.485	-9.02547	923.88	511.944	290.467	694.575	489.832	237.54	734.743	262.631	179.911	751.459	287.213	176.655	755.449	201.566	139.482	733.669	119.788	-291.086	705.65	478.456	-246.756	734.068	249.397	-185.5	756.859	261.015	-192.061	751.991	182.131	-170.182	731.894	96.9407
159	1.58	-1.56353	1117.55	430.079	59.9296	1118.73	472.687	-74.3457	1108.69	464.072	155.364	962.894	538.228	-162.494	951.614	544.456	-9.06484	923.931	511.801	290.401	694.644	489.89	237.497	734.788	262.601	179.854	751.501	287.158	176.577	755.507	201.496	139.455	733.695	119.786	-291.134	705.649	478.464	-246.785	734.05	249.399	-185.518	756.896	260.969	-192.076	751.991	182.129	-170.209	731.912	96.978
160	1.59	-1.52742	1117.54	430.005	59.9335	1118.74	472.616	-74.3287	1108.73	463.994	155.351	962.866	538.199	-162.486	951.629	544.395	-9.06585	923.901	511.711	290.353	694.716	489.939	237.468	734.799	262.541	179.81	751.52	287.081	176.511	755.542	201.391	139.422	733.713	119.725	-291.125	705.609	478.408	-246.794	734.042	249.379	-185.512	756.889	260.889	-192.057	751.939	182.126	-170.198	731.9	96.9596
161	1.6	-1.51228	1117.51	430.04	59.9521	1118.74	472.629	-74.1178	1108.75	464.034	155.342	962.858	538.191	-162.489	951.646	544.391	-9.0813	923.835	511.813	290.339	694.761	489.96	237.439	734.801	262.542	179.775	751.509	287.08	176.475	755.549	201.38	139.385	733.703	119.707	-291.154	705.59	478.381	-246.82	734.031	249.404	-185.533	756.875	260.903	-192.065	751.897	182.161	-170.221	731.89	96.9664
162	1.61	-1.51455	1117.51	430.107	59.9709	1118.75	472.668	-73.7169	1108.77	464.241	155.323	962.871	538.23	-162.503	951.672	544.406	-9.11725	923.825	511.952	290.338	694.782	489.982	237.407	734.81	262.569	179.731	751.503	287.133	176.454	755.568	201.423	139.357	733.717	119.743	-291.198	705.615	478.434	-246.854	734.018	249.425	-185.59	756.867	260.983	-192.106	751.902	182.225	-170.267	731.895	97.0132
163	1.62	-1.47151	1117.55	430.067	60.0102	1118.76	472.679	-73.5875	1108.79	464.242	155.326	962.857	538.231	-162.502	951.665	544.388	-9.11261	923.862	511.942	290.36	694.728	489.951	237.421	734.804	262.594	179.725	751.505	287.136	176.46	755.571	201.454	139.361	733.725	119.764	-291.167	705.627	478.409	-246.86	734.016	249.433	-185.603	756.86	261.013	-192.116	751.912	182.248	-170.27	731.894	97.0197
164	1.63	-1.35041	1117.57	430.048	60.1121	1118.75	472.717	-73.4634	1108.78	464.236	155.36	962.839	538.217	-162.453	951.628	544.392	-9.04967	923.867	511.931	290.392	694.635	489.903	237.476	734.786	262.624	179.785	751.497	287.116	176.505	755.551	201.479	139.419	733.699	119.778	-291.119	705.649	478.437	-246.818	733.991	249.427	-185.546	756.838	261.013	-192.075	751.919	182.207	-170.228	731.881	97.0009
165	1.64	-1.22548	1117.55	430.184	60.2229	1118.73	472.831	-73.3358	1108.76	464.285	155.396	962.834	538.237	-162.407	951.596	544.413	-8.97565	923.831	512.013	290.422	694.53	489.849	237.52	734.755	262.641	179.877	751.467	287.184	176.577	755.505	201.542	139.477	733.677	119.784	-291.111	705.688	478.51	-246.774	733.962	249.456	-185.487	756.81	261.049	-192.046	751.917	182.184	-170.193	731.863	96.9868
166	1.65	-1.15565	1117.53	430.297	60.2786	1118.74	472.907	-73.2592	1108.79	464.294	155.397	962.855	538.24	-162.386	951.588	544.414	-8.94853	923.828	512.07	290.421	694.51	489.86	237.538	734.725	262.626	179.924	751.436	287.247	176.618	755.486	201.599	139.495	733.673	119.783	-291.1	705.694	478.521	-246.766	733.964	249.455	-185.475	756.785	261.041	-192.038	751.907	182.144	-170.188	731.846	96.9825
167	1.66	-1.15176	1117.6	430.277	60.2731	1118.78	472.913	-73.2502	1108.86	464.276	155.367	962.903	538.253	-162.407	951.592	544.414	-8.97294	923.874	512.072	290.354	694.551	489.869	237.516	734.698	262.614	179.882	751.429	287.221	176.608	755.481	201.586	139.497	733.685	119.777	-291.091	705.669	478.459	-246.768	733.96	249.404	-185.477	756.79	261.017	-192.03	751.911	182.142	-170.19	731.853	96.9532
168	1.67	-1.17837	1117.68	430.323	60.234	1118.84	472.961	-73.278	1108.97	464.326	155.314	962.953	538.279	-162.463	951.622	544.449	-9.03776	923.913	512.109	290.242	694.668	489.971	237.467	734.699	262.626	179.815	751.439	287.178	176.558	755.503	201.553	139.48	733.685	119.799	-291.093	705.615	478.424	-246.788	733.957	249.404	-185.516	756.791	261.01	-192.054	751.886	182.184	-170.199	731.86	96.9706
169	1.68	-1.18406	1117.74	430.436	60.1941	1118.93	473.051	-73.3191	1109.09	464.372	155.238	962.996	538.294	-162.515	951.654	544.542	-9.10941	923.933	512.194	290.124	694.767	490.082	237.429	734.699	262.645	179.748	751.457	287.134	176.511	755.529	201.516	139.456	733.68	119.819	-291.111	705.582	478.433	-246.817	733.957	249.435	-185.546	756.807	261.001	-192.072	751.85	182.215	-170.221	731.861	97.0056
170	1.69	-1.1598	1117.86	430.472	60.1767	1119.04	473.129	-73.3247	1109.23	464.354	155.178	963.08	538.28	-162.557	951.674	544.57	-9.14425	924.014	512.175	289.981	694.82	490.127	237.418	734.708	262.64	179.729	751.471	287.116	176.517	755.564	201.491	139.469	733.694	119.8	-291.102	705.574	478.407	-246.823	733.969	249.421	-185.561	756.846	260.949	-192.082	751.872	182.194	-170.213	731.883	97.0073
171	1.7	-1.14358	1118.02	430.495	60.2013	1119.15	473.237	-73.2947	1109.36	464.364	155.138	963.202	538.261	-162.586	951.695	544.575	-9.1388	924.105	512.139	289.849	694.856	490.133	237.436	734.728	262.638	179.757	751.493	287.107	176.551	755.604	201.47	139.503	733.736	119.777	-291.068	705.601	478.418	-246.804	733.968	249.393	-185.533	756.867	260.925	-192.052	751.916	182.174	-170.198	731.913	96.9733
172	1.71	-1.07215	1118.14	430.706	60.2445	1119.23	473.415	-73.2402	1109.43	464.482	155.097	963.309	538.281	-162.581	951.679	544.624	-9.11272	924.146	512.245	289.771	694.859	490.151	237.474	734.693	262.635	179.8	751.498	287.139	176.603	755.583	201.489	139.547	733.72	119.792	-291.062	705.652	478.492	-246.777	733.955	249.438	-185.503	756.841	260.954	-192.026	751.923	182.195	-170.181	731.921	96.964
173	1.72	-1.00732	1118.23	430.978	60.2787	1119.3	473.647	-73.2176	1109.48	464.645	155.049	963.396	538.327	-162.606	951.643	544.663	-9.10087	924.16	512.404	289.695	694.85	490.166	237.509	734.644	262.665	179.826	751.475	287.169	176.692	755.543	201.559	139.57	733.696	119.81	-291.042	705.677	478.537	-246.767	733.929	249.428	-185.492	756.825	260.988	-192.033	751.926	182.18	-170.184	731.895	96.9583
174	1.73	-0.97278	1118.32	431.214	60.257	1119.42	473.883	-73.2381	1109.56	464.774	154.956	963.495	538.377	-162.669	951.611	544.724	-9.12998	924.173	512.51	289.58	694.872	490.21	237.523	734.592	262.665	179.84	751.467	287.161	176.736	755.53	201.587	139.574	733.683	119.799	-291.044	705.685	478.552	-246.797	733.906	249.415	-185.533	756.813	260.973	-192.077	751.922	182.152	-170.205	731.868	96.9624
175	1.74	-0.96368	1118.41	431.478	60.1942	1119.55	474.045	-73.2936	1109.66	464.96	154.843	963.573	538.39	-162.747	951.566	544.759	-9.20496	924.157	512.672	289.426	694.909	490.292	237.511	734.524	262.673	179.835	751.459	287.117	176.752	755.505	201.558	139.554	733.642	119.781	-291.078	705.652	478.547	-246.845	733.866	249.427	-185.579	756.77	261.01	-192.119	751.89	182.16	-170.224	731.826	96.9561
176	1.75	-0.95327	1118.5	431.746	60.1552	1119.67	474.218	-73.3262	1109.75	465.168	154.723	963.668	538.386	-162.804	951.544	544.827	-9.2512	924.132	512.885	289.266	694.986	490.382	237.518	734.473	262.682	179.839	751.454	287.082	176.773	755.485	201.501	139.562	733.617	119.758	-291.095	705.605	478.506	-246.859	733.81	249.429	-185.591	756.736	261.039	-192.134	751.831	182.201	-170.238	731.795	96.9537
177	1.76	-0.94416	1118.66	431.938	60.1144	1119.88	474.379	-73.3439	1109.91	465.334	154.593	963.796	538.366	-162.875	951.568	544.872	-9.2797	924.204	512.967	289.09	695.056	490.45	237.531	734.461	262.638	179.86	751.499	287.003	176.799	755.506	201.392	139.597	733.632	119.718	-291.104	705.572	478.421	-246.857	733.804	249.378	-185.6	756.738	260.974	-192.13	751.814	182.171	-170.249	731.808	96.9283
178	1.77	-0.95387	1118.89	432.037	60.0368	1120.1	474.495	-73.3854	1110.1	465.49	154.443	963.934	538.352	-162.969	951.613	544.899	-9.34399	924.351	512.958	288.875	695.085	490.458	237.531	734.471	262.592	179.854	751.597	286.885	176.812	755.564	201.293	139.607	733.664	119.671	-291.099	705.568	478.406	-246.876	733.826	249.326	-185.625	756.787	260.872	-192.143	751.847	182.116	-170.256	731.839	96.9307
179	1.78	-0.997	1119.18	432.124	59.9658	1120.28	474.651	-73.4292	1110.28	465.678	154.303	964.053	538.397	-163.048	951.661	544.987	-9.42409	924.519	513	288.67	695.098	490.482	237.533	734.481	262.566	179.864	751.695	286.807	176.835	755.628	201.263	139.619	733.698	119.655	-291.098	705.6	478.465	-246.903	733.849	249.348	-185.658	756.843	260.83	-192.145	751.874	182.131	-170.257	731.887	96.9537
180	1.79	-1.01488	1119.45	432.249	59.9592	1120.46	474.894	-73.4164	1110.48	465.921	154.201	964.133	538.482	-163.093	951.672	545.097	-9.44565	924.65	513.103	288.502	695.11	490.56	237.567	734.492	262.587	179.904	751.8	286.738	176.895	755.685	201.252	139.674	733.725	119.645	-291.072	705.631	478.543	-246.907	733.847	249.396	-185.665	756.86	260.848	-192.112	751.92	182.165	-170.235	731.922	96.9682
181	1.8	-1.02749	1119.66	432.434	59.9691	1120.59	475.146	-73.3927	1110.65	466.142	154.155	964.178	538.571	-163.117	951.65	545.165	-9.45289	924.732	513.201	288.368	695.127	490.649	237.627	734.478	262.616	179.973	751.852	286.707	176.981	755.67	201.256	139.745	733.736	119.632	-291.033	705.681	478.565	-246.875	733.814	249.385	-185.658	756.851	260.826	-192.081	751.958	182.15	-170.21	731.929	96.9547
182	1.81	-1.02922	1119.78	432.799	59.9809	1120.69	475.528	-73.3932	1110.79	466.457	154.108	964.2	538.694	-163.127	951.602	545.217	-9.44793	924.703	513.475	288.257	695.127	490.729	237.683	734.414	262.649	180.042	751.839	286.737	177.073	755.615	201.294	139.777	733.719	119.634	-291.022	705.711	478.591	-246.869	733.766	249.402	-185.66	756.814	260.835	-192.096	751.974	182.149	-170.211	731.906	96.9229
183	1.82	-1.03854	1119.88	433.22	59.9765	1120.78	475.901	-73.4205	1110.92	466.776	154.062	964.194	538.83	-163.157	951.562	545.276	-9.43278	924.626	513.849	288.155	695.134	490.827	237.728	734.324	262.687	180.119	751.823	286.776	177.15	755.568	201.323	139.802	733.7	119.603	-291.043	705.701	478.591	-246.899	733.695	249.473	-185.676	756.757	260.929	-192.125	751.956	182.195	-170.213	731.877	96.938
184	1.83	-1.05934	1120.01	433.534	59.9463	1120.88	476.184	-73.4604	1111.06	467.044	154.008	964.186	538.936	-163.205	951.542	545.348	-9.46339	924.626	514.066	288.026	695.118	490.93	237.768	734.253	262.717	180.169	751.832	286.752	177.198	755.531	201.303	139.83	733.676	119.602	-291.045	705.658	478.566	-246.909	733.62	249.466	-185.704	756.692	260.972	-192.156	751.923	182.23	-170.205	731.838	96.9592
185	1.84	-1.1255	1120.18	433.77	59.8977	1120.97	476.434	-73.522	1111.17	467.268	153.938	964.189	539.02	-163.273	951.505	545.423	-9.54101	924.67	514.191	287.862	695.104	491.011	237.794	734.189	262.703	180.179	751.857	286.693	177.224	755.487	201.277	139.858	733.636	119.601	-291.05	705.581	478.537	-246.937	733.541	249.436	-185.745	756.627	260.975	-192.192	751.876	182.234	-170.233	731.796	96.9497
186	1.85	-1.23071	1120.39	433.991	59.8248	1121.08	476.731	-73.6249	1111.31	467.53	153.852	964.215	539.156	-163.358	951.503	545.545	-9.6185	924.759	514.404	287.684	695.125	491.124	237.793	734.162	262.714	180.15	751.914	286.653	177.234	755.484	201.285	139.869	733.631	119.615	-291.075	705.56	478.55	-246.989	733.501	249.479	-185.821	756.624	260.944	-192.249	751.846	182.3	-170.277	731.794	96.9816
187	1.86	-1.35054	1120.67	434.172	59.7559	1121.28	476.983	-73.6968	1111.53	467.759	153.768	964.282	539.264	-163.45	951.552	545.672	-9.6988	924.91	514.476	287.495	695.193	491.231	237.783	734.199	262.723	180.13	752.017	286.605	177.234	755.538	201.282	139.874	733.67	119.644	-291.075	705.563	478.545	-247.036	733.503	249.533	-185.897	756.656	260.936	-192.285	751.883	182.287	-170.314	731.84	97.0098
188	1.87	-1.42099	1120.94	434.2	59.7183	1121.48	477.171	-73.7215	1111.79	467.899	153.734	964.35	539.339	-163.507	951.621	545.744	-9.7392	925.093	514.419	287.327	695.235	491.267	237.781	734.253	262.671	180.141	752.124	286.516	177.275	755.594	201.241	139.913	733.719	119.627	-291.024	705.603	478.574	-247.05	733.524	249.502	-185.928	756.692	260.877	-192.254	751.945	182.261	-170.288	731.905	96.9797
189	1.88	-1.39523	1121.16	434.308	59.7362	1121.64	477.371	-73.7021	1111.99	468.051	153.747	964.37	539.445	-163.519	951.656	545.787	-9.71291	925.213	514.48	287.212	695.246	491.352	237.824	734.288	262.677	180.208	752.203	286.484	177.326	755.647	201.223	139.964	733.755	119.623	-290.974	705.698	478.623	-247.028	733.521	249.469	-185.914	756.71	260.824	-192.204	752.013	182.205	-170.247	731.944	96.964
190	1.89	-1.36097	1121.3	434.578	59.7527	1121.75	477.642	-73.6846	1112.13	468.301	153.764	964.38	539.611	-163.529	951.664	545.905	-9.68697	925.297	514.653	287.119	695.205	491.464	237.869	734.3	262.757	180.264	752.248	286.54	177.378	755.671	201.273	139.987	733.773	119.651	-290.956	705.765	478.683	-247.018	733.494	249.5	-185.912	756.712	260.838	-192.208	752.076	182.187	-170.231	731.965	96.9845
191	1.9	-1.35051	1121.4	434.889	59.752	1121.84	477.876	-73.6868	1112.25	468.501	153.749	964.395	539.774	-163.562	951.648	546.008	-9.70491	925.354	514.83	287.027	695.126	491.481	237.883	734.289	262.791	180.267	752.271	286.564	177.413	755.65	201.359	140.002	733.78	119.649	-290.928	705.758	478.734	-247.038	733.442	249.553	-185.909	756.699	260.841	-192.221	752.081	182.207	-170.23	731.963	96.9856
192	1.91	-1.36623	1121.42	435.165	59.7477	1121.9	478.06	-73.9188	1112.33	468.627	153.745	964.362	539.884	-163.596	951.601	546.065	-9.72706	925.354	514.977	286.96	695.065	491.463	237.884	734.262	262.798	180.242	752.249	286.573	177.429	755.6	201.382	139.996	733.751	119.649	-290.904	705.71	478.722	-247.059	733.388	249.546	-185.918	756.651	260.828	-192.245	752.029	182.225	-170.221	731.928	96.9615
193	1.92	-1.37354	1121.44	435.548	59.7407	1121.93	478.276	-74.393	1112.41	468.703	153.741	964.336	540.028	-163.628	951.558	546.157	-9.76713	925.295	515.193	286.926	695.038	491.469	237.866	734.235	262.856	180.224	752.224	286.629	177.42	755.545	201.384	139.998	733.717	119.689	-290.919	705.649	478.676	-247.086	733.342	249.555	-185.961	756.601	260.841	-192.302	751.982	182.26	-170.244	731.872	96.9482
194	1.93	-1.37495	1121.49	435.898	59.7308	1121.99	478.46	-74.5278	1112.51	468.91	153.706	964.347	540.172	-163.669	951.529	546.248	-9.81905	925.306	515.415	286.841	695.019	491.432	237.826	734.229	262.927	180.191	752.218	286.712	177.422	755.532	201.44	139.976	733.695	119.741	-290.937	705.579	478.706	-247.12	733.308	249.589	-186.009	756.569	260.907	-192.36	751.967	182.307	-170.29	731.832	97.0116
195	1.94	-1.36188	1121.59	436.042	59.7213	1122.09	478.615	-74.569	1112.64	469.067	153.644	964.38	540.271	-163.711	951.522	546.307	-9.85465	925.387	515.531	286.722	695.029	491.42	237.802	734.255	262.897	180.158	752.25	286.7	177.43	755.548	201.457	139.975	733.699	119.746	-290.918	705.548	478.739	-247.138	733.258	249.601	-186.032	756.545	260.889	-192.375	751.956	182.324	-170.319	731.828	97.0483
196	1.95	-1.33129	1121.74	436.1	59.7421	1122.18	478.754	-74.5499	1112.79	469.19	153.609	964.423	540.346	-163.718	951.542	546.349	-9.84854	925.47	515.541	286.612	695.074	491.477	237.809	734.289	262.887	180.172	752.315	286.643	177.452	755.58	201.446	140.01	733.717	119.734	-290.867	705.558	478.743	-247.123	733.228	249.594	-186.015	756.56	260.829	-192.343	751.942	182.309	-170.3	731.838	97.0272
197	1.96	-1.291	1121.94	436.126	59.7627	1122.29	478.905	-74.4915	1112.96	469.301	153.569	964.479	540.406	-163.736	951.594	546.412	-9.81569	925.575	515.629	286.49	695.139	491.52	237.821	734.344	262.914	180.179	752.405	286.644	177.475	755.625	201.462	140.052	733.747	119.756	-290.804	705.611	478.777	-247.102	733.25	249.601	-185.998	756.606	260.854	-192.317	751.987	182.3	-170.259	731.88	97.0085
198	1.97	-1.26227	1122.14	436.226	59.7563	1122.43	479.045	-74.4667	1113.16	469.44	153.506	964.532	540.476	-163.785	951.653	546.472	-9.8474	925.703	515.701	286.353	695.192	491.529	237.803	734.406	262.906	180.143	752.505	286.647	177.469	755.686	201.473	140.076	733.791	119.81	-290.763	705.69	478.855	-247.111	733.294	249.618	-186.019	756.645	260.877	-192.318	752.044	182.311	-170.251	731.942	97.0169
199	1.98	-1.26398	1122.3	436.297	59.7392	1122.57	479.147	-74.4579	1113.32	469.587	153.441	964.576	540.511	-163.839	951.676	546.536	-9.92397	925.85	515.687	286.229	695.273	491.579	237.764	734.461	262.882	180.1	752.571	286.633	177.452	755.725	201.466	140.07	733.812	119.81	-290.716	705.706	478.843	-247.153	733.307	249.632	-186.062	756.678	260.829	-192.323	752.086	182.284	-170.261	731.979	97.0074
200	1.99	-1.23818	1122.45	436.407	59.7622	1122.66	479.294	-74.4316	1113.45	469.713	153.398	964.614	540.569	-163.883	951.672	546.592	-9.95926	925.917	515.777	286.171	695.327	491.655	237.748	734.473	262.9	180.091	752.599	286.66	177.459	755.724	201.477	140.076	733.804	119.834	-290.705	705.697	478.839	-247.168	733.308	249.623	-186.064	756.69	260.813	-192.344	752.099	182.26	-170.28	731.976	97.0014
201	2	-1.18449	1122.53	436.608	59.8187	1122.7	479.489	-74.4077	1113.55	469.831	153.363	964.625	540.625	-163.907	951.628	546.612	-9.97486	925.923	515.984	286.146	695.345	491.686	237.755	734.447	262.958	180.099	752.597	286.675	177.481	755.688	201.507	140.091	733.765	119.872	-290.72	705.669	478.837	-247.173	733.257	249.592	-186.074	756.659	260.818	-192.366	752.068	182.268	-170.282	731.934	96.981
202	2.01	-1.13451	1122.6	436.783	59.8593	1122.74	479.645	-74.3826	1113.63	469.934	153.331	964.638	540.668	-163.922	951.576	546.644	-10.0073	925.933	516.13	286.133	695.345	491.692	237.773	734.396	262.996	180.105	752.601	286.68	177.516	755.633	201.532	140.096	733.738	119.868	-290.706	705.623	478.833	-247.178	733.193	249.597	-186.08	756.613	260.813	-192.396	752.007	182.26	-170.29	731.881	96.9855
203	2.02	-1.1099	1122.74	436.974	59.9037	1122.82	479.815	-74.3585	1113.73	470.03	153.293	964.683	540.725	-163.945	951.556	546.682	-10.0471	926.012	516.195	286.104	695.388	491.69	237.786	734.392	263.017	180.095	752.637	286.726	177.551	755.625	201.599	140.102	733.73	119.875	-290.668	705.58	478.798	-247.191	733.172	249.615	-186.101	756.601	260.815	-192.414	751.967	182.271	-170.296	731.864	97.0059
204	2.03	-1.09108	1122.89	437.162	59.9395	1122.95	480.012	-74.3455	1113.86	470.167	153.246	964.765	540.792	-163.982	951.582	546.771	-10.0871	926.114	516.279	286.061	695.487	491.727	237.767	734.445	263.026	180.089	752.708	286.767	177.57	755.669	201.648	140.105	733.759	119.905	-290.646	705.569	478.825	-247.217	733.187	249.647	-186.123	756.603	260.845	-192.436	751.972	182.323	-170.308	731.873	97.02
205	2.04	-1.07031	1123.02	437.347	59.9537	1123.1	480.198	-74.3154	1113.96	470.303	153.213	964.856	540.89	-164.001	951.614	546.824	-10.078	926.202	516.339	285.977	695.633	491.827	237.764	734.521	263.001	180.087	752.789	286.777	177.581	755.734	201.642	140.124	733.774	119.95	-290.607	705.587	478.877	-247.214	733.19	249.648	-186.115	756.618	260.874	-192.445	751.98	182.339	-170.302	731.873	97.041
206	2.05	-1.01761	1123.14	437.476	59.9637	1123.22	480.328	-74.2771	1114.08	470.388	153.19	964.924	540.963	-164.006	951.636	546.846	-10.0298	926.347	516.3	285.898	695.768	491.906	237.781	734.604	262.959	180.118	752.868	286.737	177.584	755.833	201.604	140.131	733.788	119.972	-290.538	705.628	478.918	-247.191	733.182	249.622	-186.081	756.654	260.828	-192.41	752.005	182.338	-170.279	731.879	97.0365
207	2.06	-0.99586	1123.26	437.603	59.9595	1123.35	480.48	-74.2526	1114.2	470.5	153.167	965	541.038	-164.038	951.668	546.894	-9.99883	926.463	516.373	285.861	695.927	491.974	237.775	734.668	262.926	180.149	752.951	286.71	177.562	755.928	201.577	140.117	733.822	120.006	-290.471	705.655	478.927	-247.166	733.184	249.608	-186.055	756.663	260.791	-192.386	752.027	182.278	-170.278	731.903	97.0238
208	2.07	-1.01296	1123.37	437.791	59.9134	1123.49	480.653	-74.2693	1114.31	470.636	153.134	965.076	541.109	-164.086	951.69	546.927	-10.0364	926.527	516.51	285.823	696.055	491.968	237.759	734.723	262.929	180.139	753.044	286.717	177.536	756.006	201.59	140.072	733.848	120.045	-290.439	705.657	478.911	-247.178	733.204	249.619	-186.071	756.687	260.752	-192.41	752.05	182.226	-170.284	731.919	97.0011
209	2.08	-1.03642	1123.44	438.001	59.8687	1123.62	480.789	-74.3032	1114.42	470.774	153.112	965.128	541.177	-164.111	951.694	546.957	-10.0927	926.558	516.646	285.81	696.176	491.947	237.746	734.769	262.936	180.113	753.126	286.671	177.51	756.101	201.578	139.988	733.895	120.052	-290.417	705.648	478.924	-247.202	733.204	249.592	-186.1	756.704	260.719	-192.434	752.039	182.207	-170.285	731.923	96.9878
210	2.09	-1.05315	1123.51	438.206	59.85	1123.73	480.925	-74.3253	1114.51	470.931	153.112	965.175	541.307	-164.102	951.698	547.012	-10.0975	926.602	516.83	285.848	696.315	491.95	237.76	734.839	262.943	180.131	753.215	286.648	177.52	756.198	201.659	139.927	733.919	120.133	-290.371	705.64	478.873	-247.206	733.195	249.582	-186.126	756.69	260.725	-192.448	752.035	182.199	-170.291	731.919	96.978
211	2.1	-1.09984	1123.62	438.402	59.8516	1123.85	481.117	-74.3553	1114.61	471.111	153.108	965.229	541.465	-164.09	951.711	547.061	-10.0877	926.713	516.938	285.939	696.492	492.028	237.786	734.959	262.981	180.176	753.326	286.699	177.535	756.34	201.811	139.887	733.969	120.242	-290.338	705.625	478.912	-247.212	733.196	249.648	-186.125	756.688	260.779	-192.466	752.032	182.237	-170.305	731.914	97.0056
212	2.11	-1.16193	1123.81	438.41	59.8412	1123.98	481.226	-74.3791	1114.72	471.245	153.096	965.305	541.577	-164.085	951.727	547.07	-10.0717	926.867	516.862	286.018	696.645	492.061	237.818	735.119	262.959	180.214	753.462	286.738	177.516	756.523	201.916	139.796	734.042	120.3	-290.308	705.622	478.968	-247.212	733.176	249.64	-186.091	756.692	260.72	-192.463	752.023	182.267	-170.308	731.91	97.0077
213	2.12	-1.15545	1124.01	438.338	59.8317	1124.11	481.292	-74.3645	1114.82	471.315	153.104	965.393	541.667	-164.063	951.749	547.045	-10.0234	927.022	516.789	286.105	696.795	492.065	237.891	735.32	262.917	180.263	753.633	286.735	177.471	756.704	201.975	139.666	734.087	120.371	-290.23	705.646	478.991	-247.18	733.173	249.561	-186.058	756.706	260.657	-192.425	751.996	182.242	-170.279	731.912	96.9567
214	2.13	-1.16559	1124.13	438.477	59.8094	1124.22	481.395	-74.3828	1114.93	471.467	153.1	965.5	541.824	-164.08	951.779	547.12	-9.98481	927.123	516.904	286.195	696.959	492.061	237.958	735.56	262.953	180.353	753.82	286.87	177.438	756.91	202.153	139.439	734.132	120.565	-290.165	705.664	479.013	-247.165	733.179	249.572	-186.048	756.716	260.676	-192.411	752.005	182.226	-170.261	731.922	96.9475
215	2.14	-1.27161	1124.21	438.783	59.7515	1124.34	481.528	-74.4395	1115.04	471.708	153.054	965.602	542.038	-164.153	951.804	547.259	-10.0184	927.169	517.193	286.267	697.092	492.032	237.951	735.835	262.979	180.403	753.997	287.121	177.347	757.125	202.367	139.072	734.136	120.868	-290.158	705.657	479.05	-247.21	733.178	249.668	-186.094	756.701	260.761	-192.457	752.021	182.31	-170.291	731.914	96.9973
216	2.15	-1.34665	1124.28	438.949	59.6819	1124.41	481.574	-74.4734	1115.11	471.834	152.975	965.675	542.168	-164.223	951.799	547.33	-10.0508	927.203	517.369	286.333	697.205	491.976	237.922	736.147	262.918	180.402	754.154	287.265	177.226	757.345	202.502	138.628	734.112	121.197	-290.129	705.622	479.047	-247.241	733.157	249.661	-186.134	756.679	260.791	-192.493	752.016	182.321	-170.314	731.892	97.0153
217	2.16	-1.34778	1124.32	439.047	59.6901	1124.46	481.632	-74.4516	1115.15	471.933	152.957	965.732	542.286	-164.216	951.771	547.359	-10.0096	927.232	517.484	286.421	697.316	491.935	237.945	736.468	262.848	180.491	754.307	287.418	177.141	757.623	202.685	138.168	734.098	121.545	-290.07	705.593	479	-247.2	733.117	249.589	-186.105	756.652	260.774	-192.481	751.998	182.236	-170.286	731.866	96.9683
218	2.17	-1.33948	1124.33	439.223	59.7116	1124.5	481.763	-74.4177	1115.21	472.086	152.975	965.798	542.477	-164.212	951.766	547.42	-9.96491	927.212	517.696	286.558	697.433	491.91	237.986	736.788	262.89	180.587	754.477	287.674	177.026	757.968	202.944	137.698	734.116	121.942	-290.047	705.573	479.011	-247.173	733.087	249.595	-186.06	756.622	260.762	-192.488	751.97	182.205	-170.261	731.856	96.9608
219	2.18	-1.3723	1124.41	439.325	59.703	1124.57	481.876	-74.4419	1115.29	472.202	152.933	965.886	542.631	-164.243	951.782	547.462	-9.9819	927.266	517.799	286.703	697.566	491.881	237.96	737.114	262.947	180.532	754.747	287.75	176.822	758.347	203.155	137.126	734.251	122.254	-290.043	705.6	479.066	-247.191	733.095	249.619	-186.068	756.628	260.733	-192.515	751.977	182.237	-170.288	731.86	96.9687
220	2.19	-1.40866	1124.62	439.201	59.6951	1124.64	481.929	-74.4554	1115.41	472.198	152.878	966.007	542.718	-164.282	951.819	547.483	-10.0043	927.433	517.73	286.81	697.693	491.837	237.925	737.497	263	180.399	755.082	287.721	176.645	758.894	202.788	136.422	734.496	122.642	-289.984	705.57	479.022	-247.213	733.121	249.605	-186.091	756.672	260.679	-192.514	752	182.231	-170.315	731.897	96.9526
221	2.2	-1.41554	1124.77	439.107	59.7037	1124.7	482	-74.4559	1115.5	472.259	152.839	966.107	542.862	-164.303	951.846	547.536	-10.0162	927.574	517.714	286.94	697.849	491.88	237.876	737.943	263.132	180.302	755.415	287.832	176.506	759.641	202.007	135.605	734.821	123.356	-289.933	705.554	479.027	-247.24	733.116	249.63	-186.121	756.708	260.67	-192.499	751.989	182.246	-170.326	731.912	96.989
222	2.21	-1.39568	1124.83	439.199	59.7522	1124.75	482.138	-74.4384	1115.56	472.367	152.831	966.19	543.041	-164.32	951.862	547.63	-10.0153	927.637	517.822	287.081	698.047	492	237.785	738.442	263.257	180.197	755.72	288.123	176.177	760.144	202.277	134.91	735.282	123.86	-289.929	705.565	479.093	-247.248	733.094	249.67	-186.124	756.692	260.716	-192.504	751.967	182.281	-170.334	731.906	97.0332
223	2.22	-1.33157	1124.9	439.19	59.7876	1124.8	482.224	-74.395	1115.61	472.393	152.829	966.267	543.197	-164.341	951.874	547.691	-9.98253	927.71	517.87	287.204	698.208	492.051	237.651	739.01	263.345	180.043	756.005	288.455	175.923	760.676	202.399	134.311	735.91	124.061	-289.895	705.596	479.163	-247.24	733.086	249.673	-186.114	756.684	260.728	-192.497	751.968	182.267	-170.324	731.908	97.0211
224	2.23	-1.24113	1124.98	439.168	59.8337	1124.86	482.279	-74.1225	1115.64	472.472	152.81	966.347	543.271	-164.361	951.89	547.742	-9.93046	927.78	517.914	287.296	698.342	492.081	237.464	739.607	263.429	179.841	756.265	288.737	175.683	761.231	202.573	133.844	736.553	124.312	-289.825	705.618	479.146	-247.204	733.099	249.649	-186.091	756.691	260.693	-192.469	751.981	182.191	-170.303	731.913	97.004
225	2.24	-1.12795	1125	439.303	59.8618	1124.92	482.373	-73.624	1115.65	472.738	152.793	966.424	543.378	-164.404	951.906	547.826	-9.887	927.771	518.074	287.367	698.45	492.056	237.251	740.189	263.543	179.603	756.542	288.931	175.416	761.894	202.649	133.415	737.243	124.844	-289.799	705.634	479.122	-247.195	733.113	249.651	-186.069	756.709	260.716	-192.47	751.999	182.233	-170.291	731.917	96.9789
226	2.25	-1.04455	1124.95	439.504	59.8852	1124.93	482.467	-73.4662	1115.65	472.858	152.765	966.47	543.499	-164.452	951.91	547.873	-9.87409	927.733	518.167	287.43	698.56	492.079	237.063	740.755	263.702	179.349	756.81	289.17	175.056	762.622	202.8	132.939	738.011	125.426	-289.833	705.626	479.154	-247.186	733.126	249.642	-186.057	756.691	260.716	-192.497	752.013	182.259	-170.282	731.912	96.9421
227	2.26	-0.9545	1124.9	439.628	59.9228	1124.93	482.568	-73.3894	1115.65	472.893	152.729	966.494	543.578	-164.473	951.894	547.885	-9.86118	927.694	518.264	287.482	698.629	492.12	236.891	741.332	263.867	179.153	757.141	289.474	174.64	763.288	203.266	132.485	738.764	125.966	-289.851	705.592	479.096	-247.18	733.104	249.604	-186.049	756.664	260.669	-192.509	752.002	182.206	-170.291	731.882	96.9334
228	2.27	-0.86455	1124.85	439.753	59.9825	1124.91	482.691	-73.3413	1115.66	472.947	152.682	966.514	543.689	-164.495	951.851	547.902	-9.87856	927.659	518.419	287.51	698.65	492.111	236.666	741.941	264.132	178.97	757.657	289.82	174.301	764.015	203.751	132.037	739.658	126.42	-289.874	705.533	479.029	-247.196	733.066	249.589	-186.055	756.634	260.655	-192.519	751.987	182.213	-170.303	731.87	96.9338
229	2.28	-0.83657	1124.8	439.9	60.0262	1124.88	482.821	-73.3131	1115.65	473.02	152.66	966.547	543.849	-164.52	951.814	547.941	-9.92298	927.609	518.621	287.521	698.68	492.116	236.421	742.556	264.413	178.72	758.193	290.188	173.951	764.851	204.287	131.544	740.712	126.764	-289.923	705.523	479.059	-247.223	733.028	249.611	-186.09	756.584	260.759	-192.538	751.953	182.272	-170.317	731.856	96.9552
230	2.29	-0.77225	1124.83	439.92	60.0885	1124.89	482.922	-73.2583	1115.68	473.027	152.642	966.603	543.959	-164.509	951.815	547.927	-9.92699	927.666	518.653	287.522	698.752	492.152	236.239	743.149	264.708	178.49	758.786	290.507	173.713	765.844	204.45	131.056	741.84	127.135	-289.907	705.531	479.041	-247.228	733.023	249.633	-186.115	756.589	260.762	-192.541	751.926	182.283	-170.314	731.855	96.9566
231	2.3	-0.68717	1124.97	439.786	60.1466	1124.93	482.992	-73.1903	1115.78	472.937	152.62	966.716	544.075	-164.504	951.861	547.946	-9.90273	927.821	518.596	287.496	698.851	492.217	236.031	743.825	264.859	178.3	759.534	290.787	173.444	766.863	204.715	130.445	743.23	127.204	-289.872	705.575	479.027	-247.221	733.063	249.628	-186.114	756.651	260.728	-192.528	751.965	182.242	-170.304	731.885	96.9343
232	2.31	-0.63141	1125.13	439.677	60.1983	1125.01	483.051	-73.183	1115.89	472.882	152.566	966.84	544.236	-164.533	951.912	547.984	-9.89608	927.983	518.502	287.382	698.959	492.229	235.717	744.576	264.922	178.163	760.344	291.117	173.027	767.992	204.938	129.865	744.667	127.276	-289.851	705.62	479.096	-247.237	733.098	249.654	-186.121	756.712	260.679	-192.508	751.989	182.28	-170.321	731.919	96.9604
233	2.32	-0.53554	1125.24	439.581	60.2497	1125.07	483.112	-73.1473	1115.97	472.847	152.524	966.94	544.342	-164.542	951.946	547.959	-9.89104	928.112	518.375	287.254	699.068	492.212	235.384	745.275	265.057	178.012	761.283	291.261	172.737	769.226	204.858	129.357	746.191	127.471	-289.83	705.662	479.166	-247.23	733.106	249.656	-186.117	756.749	260.62	-192.493	752.002	182.244	-170.308	731.932	96.9661
234	2.33	-0.39481	1125.23	439.66	60.3305	1125.1	483.195	-73.0506	1115.95	472.86	152.502	966.994	544.441	-164.527	951.946	547.927	-9.81305	928.113	518.4	287.168	699.113	492.18	235.083	745.852	265.199	177.895	762.334	291.397	172.549	770.476	205.074	128.962	747.583	127.881	-289.796	705.664	479.114	-247.187	733.088	249.595	-186.058	756.726	260.586	-192.465	751.997	182.149	-170.277	731.916	96.9202
235	2.34	-0.32292	1125.12	439.958	60.3696	1125.09	483.328	-72.9786	1115.89	472.988	152.466	967.01	544.591	-164.549	951.93	547.979	-9.77933	928.017	518.686	287.086	699.089	492.096	234.76	746.433	265.323	177.795	763.393	291.774	172.295	771.788	205.521	128.494	749.001	128.437	-289.829	705.644	479.089	-247.196	733.05	249.622	-186.059	756.678	260.626	-192.49	751.96	182.192	-170.275	731.89	96.9183
236	2.35	-0.31487	1125	440.293	60.3679	1125.09	483.446	-72.9565	1115.86	473.204	152.394	967.011	544.751	-164.601	951.907	548.077	-9.83068	927.898	519.066	286.995	699.048	491.98	234.333	747.086	265.456	177.643	764.501	292.191	171.997	773.208	205.742	127.928	750.535	129.071	-289.888	705.598	479.123	-247.252	732.992	249.69	-186.118	756.605	260.742	-192.552	751.919	182.308	-170.322	731.841	96.981
237	2.36	-0.26655	1124.94	440.551	60.3883	1125.08	483.556	-72.9207	1115.87	473.314	152.366	967.019	544.917	-164.624	951.885	548.098	-9.85941	927.857	519.234	286.914	699.017	491.829	233.861	747.742	265.573	177.495	765.708	292.67	171.666	774.733	205.975	127.235	752.472	129.293	-289.888	705.551	479.075	-247.265	732.95	249.68	-186.146	756.567	260.743	-192.566	751.917	182.321	-170.333	731.812	96.9767
238	2.37	-0.16269	1124.95	440.685	60.4667	1125.09	483.699	-72.8438	1115.91	473.326	152.373	967.05	545.03	-164.598	951.88	548.085	-9.81993	927.885	519.249	286.865	699.022	491.748	233.427	748.383	265.742	177.314	766.975	292.995	171.434	776.384	206.247	126.64	754.489	129.754	-289.86	705.551	479.029	-247.245	732.941	249.639	-186.129	756.565	260.714	-192.559	751.928	182.243	-170.312	731.798	96.9117
239	2.38	-0.08576	1125.07	440.668	60.545	1125.12	483.849	-72.7759	1116	473.335	152.378	967.109	545.151	-164.585	951.898	548.087	-9.78497	927.979	519.214	286.801	699.073	491.693	232.97	749.109	265.93	177.155	768.407	293.354	171.161	778.166	206.751	125.982	756.58	130.397	-289.85	705.616	479.09	-247.213	732.954	249.608	-186.1	756.609	260.713	-192.542	751.946	182.192	-170.304	731.825	96.9116
240	2.39	-0.04197	1125.26	440.568	60.6014	1125.18	483.992	-72.7392	1116.14	473.338	152.356	967.209	545.224	-164.569	951.95	548.067	-9.78583	928.123	519.108	286.697	699.192	491.626	232.445	749.936	266.003	177.046	769.939	293.847	170.779	780.004	207.09	125.15	758.916	130.846	-289.827	705.7	479.151	-247.202	732.985	249.62	-186.104	756.668	260.662	-192.522	751.972	182.206	-170.289	731.878	96.9233
241	2.4	-0.00493	1125.45	440.463	60.6437	1125.27	484.051	-72.7133	1116.31	473.293	152.33	967.321	545.248	-164.558	952.012	548.056	-9.79169	928.315	518.897	286.581	699.332	491.552	231.908	750.75	266.128	176.892	771.532	294.256	170.358	782.015	207.407	124.142	761.41	131.235	-289.769	705.738	479.115	-247.202	733.007	249.603	-186.116	756.725	260.574	-192.499	752	182.162	-170.269	731.919	96.8883
242	2.41	0.03488	1125.56	440.576	60.6823	1125.34	484.158	-72.7041	1116.44	473.37	152.298	967.402	545.321	-164.584	952.047	548.088	-9.81481	928.417	518.88	286.483	699.429	491.467	231.205	751.682	266.256	176.647	773.286	294.558	169.883	784.146	208.086	123.06	763.861	132.098	-289.744	705.714	479.088	-247.228	733.012	249.6	-186.145	756.736	260.581	-192.505	752.014	182.171	-170.286	731.936	96.8964
243	2.42	0.06771	1125.61	440.825	60.6946	1125.41	484.283	-72.7146	1116.5	473.517	152.25	967.464	545.424	-164.624	952.055	548.186	-9.84079	928.426	518.988	286.547	699.498	491.154	230.456	752.579	266.315	176.551	775.062	294.834	169.133	786.063	209.607	121.743	765.996	133.621	-289.781	705.7	479.205	-247.266	732.982	249.658	-186.192	756.715	260.67	-192.537	751.973	182.236	-170.314	731.907	96.9607
244	2.43	0.11144	1125.64	440.963	60.6875	1125.46	484.317	-72.6829	1116.53	473.629	152.202	967.499	545.519	-164.642	952.051	548.203	-9.82592	928.387	519.088	286.654	699.54	490.703	229.695	753.493	266.499	176.512	776.91	295.075	168.253	787.669	212.431	120.135	767.922	135.575	-289.796	705.641	479.191	-247.276	732.931	249.654	-186.199	756.682	260.643	-192.564	751.949	182.249	-170.326	731.874	96.9643
245	2.44	0.18243	1125.65	441.088	60.715	1125.49	484.4	-72.7949	1116.55	473.612	152.193	967.542	545.589	-164.638	952.034	548.178	-9.76586	928.328	519.174	286.376	699.552	490.816	228.806	754.498	266.62	176.238	778.717	296.118	167.678	790.166	212.965	118.592	770.846	136.76	-289.775	705.611	479.116	-247.257	732.891	249.606	-186.166	756.632	260.603	-192.567	751.941	182.23	-170.303	731.842	96.9323
246	2.45	0.24536	1125.6	441.302	60.7807	1125.52	484.561	-73.1609	1116.6	473.492	152.197	967.588	545.657	-164.617	952.014	548.196	-9.70167	928.218	519.402	286.357	699.563	490.628	227.919	755.47	266.87	176.051	780.72	297.123	167.164	793.368	212.038	116.872	774.592	137.36	-289.769	705.618	479.116	-247.256	732.856	249.608	-186.154	756.581	260.624	-192.581	751.933	182.21	-170.283	731.809	96.8892
247	2.46	0.27408	1125.59	441.509	60.8087	1125.55	484.708	-73.0452	1116.65	473.668	152.195	967.654	545.759	-164.609	952.014	548.243	-9.69809	928.19	519.579	286.41	699.621	490.424	226.905	756.627	267.126	175.889	782.885	298.059	166.465	796.297	212.709	114.976	778.143	138.804	-289.75	705.656	479.167	-247.273	732.833	249.665	-186.172	756.586	260.649	-192.585	751.968	182.198	-170.277	731.803	96.8679
248	2.47	0.2945	1125.71	441.512	60.8391	1125.61	484.797	-72.8156	1116.72	473.865	152.168	967.758	545.856	-164.612	952.048	548.271	-9.72597	928.289	519.535	286.628	700.484	491.067	225.809	757.921	267.366	175.896	785.386	298.663	165.546	798.998	214.543	113.042	781.58	140.826	-289.695	705.718	479.215	-247.312	732.833	249.692	-186.201	756.603	260.65	-192.585	752.029	182.165	-170.285	731.842	96.8704
249	2.48	0.29905	1125.88	441.37	60.8921	1125.66	484.855	-73.1423	1116.87	473.701	152.141	967.873	545.939	-164.606	952.078	548.208	-9.72789	928.421	519.406	286.927	701.617	491.929	224.58	759.427	267.603	175.902	788.147	299.133	164.417	801.638	218.009	111.134	784.851	143.222	-289.664	705.792	479.265	-247.334	732.831	249.66	-186.221	756.635	260.605	-192.576	752.062	182.139	-170.287	731.879	96.874
250	2.49	0.3364	1126	441.26	60.9547	1125.68	484.901	-73.177	1116.99	473.644	152.135	967.976	546.038	-164.584	952.101	548.159	-9.70294	928.542	519.316	286.722	700.525	490.052	223.276	761.047	267.866	175.3	790.778	300.384	163.035	805.54	219.851	108.75	789.278	145.086	-289.665	705.809	479.269	-247.344	732.823	249.635	-186.248	756.665	260.567	-192.569	752.048	182.16	-170.284	731.909	96.8634
251	2.5	0.39463	1126.1	441.194	61.0087	1125.71	484.961	-73.1333	1117.08	473.642	152.108	968.113	546.164	-164.575	952.134	548.153	-9.65392	928.63	519.291	286.729	700.385	489.125	221.908	762.819	268.123	174.835	793.513	301.561	161.937	809.769	219.691	105.847	794.526	146.597	-289.681	705.786	479.259	-247.347	732.82	249.636	-186.283	756.672	260.556	-192.6	752.012	182.172	-170.299	731.93	96.8882
252	2.51	0.42696	1126.17	441.162	61.0128	1125.77	485.013	-73.1221	1117.16	473.725	152.046	968.258	546.312	-164.6	952.167	548.177	-9.6621	928.679	519.321	286.774	700.501	488.464	220.337	764.731	268.444	174.4	796.276	302.798	160.664	813.476	220.683	103.114	799.39	148.792	-289.67	705.734	479.229	-247.388	732.784	249.662	-186.349	756.669	260.543	-192.639	751.987	182.21	-170.336	731.909	96.9256
253	2.52	0.44748	1126.21	441.228	61.0013	1125.8	485.044	-73.1187	1117.19	473.833	151.988	968.395	546.495	-164.636	952.196	548.209	-9.69518	928.699	519.414	286.829	700.718	487.926	218.711	766.721	268.88	173.9	799.105	304.027	159.508	816.668	222.48	100.453	804.245	151.048	-289.666	705.698	479.243	-247.445	732.739	249.693	-186.412	756.641	260.592	-192.65	751.977	182.245	-170.358	731.879	96.9612
254	2.53	0.51688	1126.18	441.362	61.0479	1125.83	485.076	-73.0569	1117.19	473.865	151.958	968.525	546.679	-164.638	952.216	548.23	-9.64437	928.669	519.575	286.924	700.973	487.425	217.058	768.815	269.442	173.46	801.939	305.514	158.555	819.349	224.682	97.8633	809.257	153.269	-289.67	705.705	479.283	-247.462	732.678	249.73	-186.417	756.584	260.639	-192.663	751.979	182.262	-170.372	731.852	96.9621
255	2.54	0.66699	1126.13	441.517	61.1395	1125.84	485.089	-72.9154	1117.18	473.816	151.971	968.661	546.857	-164.601	952.222	548.221	-9.52775	928.588	519.797	287.05	701.219	486.85	215.312	771.09	270.09	172.987	804.891	307.045	157.309	822.812	226.5	95.0794	814.468	156.028	-289.597	705.745	479.265	-247.441	732.628	249.72	-186.396	756.539	260.617	-192.653	751.996	182.269	-170.347	731.837	96.938
256	2.55	0.82913	1126.09	441.643	61.2511	1125.85	485.134	-72.7581	1117.19	473.787	151.983	968.795	547.046	-164.54	952.248	548.197	-9.3822	928.536	519.926	287.244	701.5	486.111	213.482	773.563	270.76	172.413	807.972	308.574	155.891	826.518	228.231	92.153	819.876	158.991	-289.494	705.817	479.307	-247.413	732.606	249.717	-186.353	756.535	260.57	-192.63	752.058	182.248	-170.285	731.846	96.8805
257	2.56	0.97269	1126.12	441.696	61.3938	1125.86	485.26	-72.4223	1117.22	473.865	152.006	968.951	547.249	-164.491	952.288	548.21	-9.27868	928.565	520.002	287.426	701.848	485.395	211.57	776.251	271.364	171.785	811.244	310.194	154.381	830.363	230.149	89.0982	825.462	162.088	-289.431	705.898	479.382	-247.386	732.605	249.705	-186.336	756.551	260.531	-192.611	752.117	182.23	-170.244	731.885	96.8504
258	2.57	1.11436	1126.16	441.692	61.5361	1125.84	485.331	-71.8413	1117.24	474.043	151.983	969.104	547.397	-164.451	952.314	548.173	-9.21435	928.606	520.11	287.559	702.275	484.801	209.56	779.179	271.905	171.062	814.671	311.868	152.746	834.393	232.13	85.9607	831.221	165.347	-289.393	705.925	479.431	-247.376	732.605	249.698	-186.331	756.567	260.505	-192.596	752.149	182.217	-170.231	731.908	96.8521
259	2.58	1.2206	1126.19	441.67	61.6544	1125.83	485.378	-71.6333	1117.31	474.057	151.813	969.283	547.525	-164.431	952.333	548.155	-9.19687	928.702	520.14	287.704	702.77	484.016	207.527	782.211	272.631	170.233	818.231	313.617	150.951	838.497	234.107	82.8106	837.22	168.791	-289.388	705.917	479.428	-247.397	732.599	249.712	-186.351	756.577	260.496	-192.617	752.15	182.192	-170.25	731.901	96.8737
260	2.59	1.28495	1126.23	441.673	61.739	1125.83	485.424	-71.563	1117.38	474.061	151.43	969.604	547.582	-164.452	952.369	548.157	-9.25044	928.821	520.138	287.787	703.342	483.086	205.397	785.307	273.515	169.403	821.865	315.532	149.145	842.725	236.266	79.6589	843.318	172.343	-289.391	705.847	479.415	-247.456	732.585	249.745	-186.426	756.595	260.522	-192.662	752.104	182.223	-170.309	731.909	96.9379
261	2.6	1.33102	1126.26	441.627	61.8022	1125.85	485.425	-71.4963	1117.47	474.021	151.175	969.936	547.67	-164.489	952.397	548.154	-9.30128	928.94	520.127	287.785	703.993	482.277	203.137	788.529	274.485	168.481	825.553	317.245	147.287	847.089	238.439	76.4904	849.519	176.104	-289.398	705.785	479.424	-247.505	732.564	249.745	-186.504	756.604	260.53	-192.692	752.046	182.313	-170.348	731.907	96.9666
262	2.61	1.48484	1126.24	441.641	61.9029	1125.84	485.449	-71.3795	1117.49	473.945	151.336	970.041	547.958	-164.512	952.428	548.162	-9.28468	928.998	520.159	287.782	704.623	481.299	200.889	791.762	275.512	167.79	829.337	318.927	145.375	851.442	240.558	73.4318	855.729	180.12	-289.388	705.756	479.403	-247.522	732.557	249.714	-186.521	756.577	260.5	-192.689	752.02	182.312	-170.355	731.884	96.952
263	2.62	1.71534	1126.17	441.79	62.0376	1125.83	485.523	-71.186	1117.48	473.904	151.303	970.267	548.207	-164.521	952.449	548.183	-9.20473	928.987	520.343	287.737	705.2	480.138	198.469	795.054	276.566	167.506	832.971	320.26	143.375	855.814	243.226	70.4974	862.148	184.203	-289.345	705.78	479.384	-247.509	732.555	249.741	-186.491	756.562	260.476	-192.694	752.033	182.28	-170.355	731.887	96.9166
264	2.63	1.95575	1126.14	441.943	62.1809	1125.83	485.615	-70.9715	1117.49	473.945	151.217	970.559	548.496	-164.511	952.494	548.212	-9.11288	929.031	520.54	287.642	705.712	478.896	195.916	798.176	277.918	166.882	836.261	321.269	141.281	860.303	246.273	67.6235	868.618	188.295	-289.285	705.847	479.455	-247.501	732.553	249.776	-186.457	756.555	260.492	-192.698	752.113	182.257	-170.331	731.9	96.9323
265	2.64	2.2207	1126.1	442.037	62.3446	1125.79	485.701	-70.7541	1117.51	473.974	151.113	970.854	548.726	-164.493	952.531	548.222	-9.05357	929.095	520.637	287.604	706.291	477.512	193.562	801.493	279.248	165.924	839.708	322.937	139.526	864.757	248.64	64.8268	875.019	192.437	-289.231	705.917	479.56	-247.477	732.55	249.769	-186.424	756.55	260.493	-192.666	752.172	182.254	-170.292	731.908	96.9165
266	2.65	2.48757	1126.03	442.063	62.5182	1125.71	485.859	-70.5588	1117.51	473.958	151.025	971.096	548.881	-164.469	952.532	548.194	-8.99191	929.075	520.757	287.553	706.938	476.392	191.27	804.87	280.572	165.011	843.161	325.066	137.821	869.103	251.045	62.0815	881.365	196.543	-289.181	705.966	479.567	-247.439	732.52	249.716	-186.4	756.537	260.466	-192.641	752.181	182.172	-170.251	731.891	96.8483
267	2.66	2.70741	1125.95	442.2	62.6814	1125.63	486.089	-70.436	1117.52	473.981	150.916	971.319	549.067	-164.467	952.535	548.2	-8.96237	929.053	520.972	287.488	707.724	475.376	189.012	808.298	281.766	164.039	846.609	327.252	136.069	873.388	253.43	59.428	887.595	200.84	-289.169	705.954	479.519	-247.442	732.502	249.703	-186.404	756.523	260.471	-192.667	752.172	182.123	-170.239	731.881	96.829
268	2.67	2.82277	1125.95	442.329	62.7992	1125.59	486.313	-70.3705	1117.57	474.045	150.771	971.562	549.267	-164.495	952.564	548.26	-9.02409	929.08	521.13	287.403	708.488	474.226	186.731	811.839	282.813	163.025	849.975	329.404	134.356	877.653	255.92	56.8961	893.75	205.315	-289.177	705.916	479.477	-247.486	732.5	249.758	-186.469	756.531	260.526	-192.716	752.155	182.199	-170.291	731.886	96.865
269	2.68	2.91599	1126.01	442.369	62.8734	1125.62	486.472	-70.3337	1117.63	474.072	150.604	971.845	549.49	-164.54	952.592	548.298	-9.09407	929.161	521.192	287.236	709.249	473.082	184.514	815.371	283.91	162.052	853.224	331.699	132.576	881.893	258.563	54.3927	899.838	209.725	-289.19	705.838	479.451	-247.535	732.503	249.775	-186.539	756.537	260.53	-192.74	752.113	182.27	-170.329	731.887	96.891
270	2.69	3.05606	1126.07	442.346	62.9571	1125.64	486.59	-70.2656	1117.7	474.048	150.421	972.148	549.714	-164.565	952.615	548.314	-9.11611	929.241	521.196	287.051	709.942	471.74	182.435	818.827	285.263	161.163	856.367	333.994	130.819	886.075	261.257	51.9744	905.822	214.117	-289.186	705.76	479.438	-247.554	732.501	249.762	-186.554	756.57	260.475	-192.749	752.083	182.252	-170.342	731.863	96.9074
271	2.7	3.21602	1126.11	442.426	63.0529	1125.68	486.732	-70.1698	1117.77	474.064	150.237	972.505	549.929	-164.591	952.646	548.336	-9.09958	929.319	521.254	286.85	710.707	470.524	180.451	822.242	286.601	160.221	859.418	336.093	129.114	890.116	263.967	49.7077	911.592	218.62	-289.195	705.757	479.482	-247.547	732.497	249.773	-186.562	756.582	260.475	-192.746	752.066	182.258	-170.344	731.855	96.9183
272	2.71	3.3489	1126.24	442.433	63.1079	1125.73	486.86	-70.075	1117.85	474.097	150.036	972.877	550.168	-164.616	952.692	548.378	-9.09299	929.432	521.298	286.58	711.516	469.409	178.499	825.65	287.867	159.207	862.389	338.088	127.399	894.027	266.634	47.4983	917.197	223.098	-289.166	705.83	479.54	-247.535	732.532	249.8	-186.536	756.6	260.472	-192.745	752.086	182.296	-170.307	731.896	96.9102
273	2.72	3.46225	1126.35	442.408	63.1457	1125.81	486.996	-69.9764	1117.92	474.118	149.846	973.228	550.383	-164.654	952.745	548.408	-9.09348	929.559	521.269	286.377	712.328	468.272	176.557	828.99	289.202	158.195	865.364	340.428	125.4	898.038	269.562	45.3808	922.538	227.486	-289.106	705.89	479.547	-247.526	732.546	249.757	-186.502	756.636	260.459	-192.707	752.15	182.292	-170.288	731.934	96.8954
274	2.73	3.58537	1126.38	442.582	63.2212	1125.84	487.207	-69.8694	1117.98	474.184	149.666	973.52	550.712	-164.685	952.765	548.437	-9.09122	929.617	521.406	286.166	713.061	467.291	174.732	832.024	290.627	157.088	868.159	342.647	123.135	902.046	273.098	43.3822	927.554	231.826	-289.069	705.929	479.558	-247.508	732.532	249.731	-186.481	756.654	260.448	-192.686	752.197	182.264	-170.27	731.946	96.8925
275	2.74	3.68789	1126.36	442.862	63.2894	1125.81	487.468	-69.7694	1117.99	474.311	149.496	973.749	551.048	-164.687	952.754	548.486	-9.07121	929.578	521.675	286.014	713.779	466.198	172.908	834.956	292.087	156.222	870.818	344.616	121.484	905.552	276.267	41.5036	932.344	236.198	-289.056	705.91	479.576	-247.504	732.497	249.756	-186.468	756.607	260.456	-192.696	752.208	182.261	-170.255	731.923	96.8965
276	2.75	3.75084	1126.37	443.077	63.3409	1125.8	487.728	-69.7111	1118.02	474.412	149.325	973.972	551.306	-164.702	952.74	548.525	-9.07544	929.528	521.889	285.871	714.509	465.067	171.177	837.85	293.487	155.455	873.41	346.66	119.942	908.841	278.969	39.7342	936.921	240.535	-289.052	705.875	479.582	-247.522	732.477	249.77	-186.48	756.575	260.449	-192.722	752.184	182.268	-170.25	731.903	96.8818
277	2.76	3.77235	1126.43	443.231	63.3637	1125.82	487.967	-69.6842	1118.09	474.49	149.14	974.225	551.532	-164.737	952.739	548.552	-9.14056	929.551	522.018	285.677	715.19	464.066	169.409	840.649	294.725	154.738	875.875	348.779	118.423	912.054	281.583	38.0496	941.241	244.717	-289.064	705.842	479.524	-247.556	732.47	249.768	-186.522	756.569	260.435	-192.759	752.175	182.251	-170.272	731.892	96.8448
278	2.77	3.81324	1126.52	443.487	63.3554	1125.87	488.189	-69.6743	1118.16	474.605	148.959	974.518	551.764	-164.771	952.749	548.63	-9.20094	929.593	522.162	285.752	715.879	463.058	167.587	843.291	296.085	154.132	878.171	351.004	117.069	915.168	284.239	36.4497	945.426	248.77	-289.063	705.807	479.502	-247.634	732.692	250.108	-186.571	756.553	260.458	-192.958	752.451	181.849	-170.003	732.223	96.3935
279	2.78	3.83769	1126.62	443.745	63.3738	1125.93	488.412	-69.6675	1118.25	474.747	148.773	974.817	552.01	-164.799	952.749	548.692	-9.2607	929.628	522.282	286.008	716.581	462.064	165.852	845.832	297.594	153.539	880.465	353.058	115.825	918.191	286.89	34.9898	949.439	252.813	-289.05	705.783	479.514	-247.75	733.196	250.871	-186.61	756.554	260.491	-193.342	753.055	180.984	-169.388	732.949	95.3847
280	2.79	3.86555	1126.75	443.905	63.3938	1126.04	488.595	-69.6524	1118.38	474.872	148.577	975.145	552.259	-164.832	952.779	548.722	-9.28897	929.702	522.284	285.879	717.304	461.297	164.114	848.343	298.916	152.944	882.685	354.769	114.575	921.079	289.318	33.6127	953.41	256.736	-289.035	705.776	479.523	-247.732	733.1	250.714	-186.622	756.581	260.486	-193.297	752.93	181.159	-169.52	732.823	95.5971
281	2.8	3.89903	1126.91	443.991	63.3785	1126.18	488.73	-69.6481	1118.55	474.971	148.376	975.454	552.44	-164.881	952.819	548.746	-9.30288	929.815	522.245	285.66	717.979	460.5	162.382	850.717	300.209	152.434	884.845	356.612	113.405	923.9	291.775	32.3665	957.279	260.587	-289.021	705.794	479.545	-247.658	732.646	250.003	-186.643	756.631	260.435	-192.97	752.343	181.989	-170.125	732.151	96.591
282	2.81	3.91487	1127.08	444.146	63.362	1126.33	488.913	-69.6562	1118.71	475.087	148.197	975.737	552.662	-164.93	952.857	548.798	-9.33617	929.943	522.214	285.39	718.676	459.517	160.684	852.957	301.637	151.994	886.951	358.453	112.321	926.599	294.39	31.2247	961.111	264.462	-289.022	705.825	479.598	-247.692	732.746	250.166	-186.667	756.657	260.421	-193.054	752.491	181.807	-169.992	732.316	96.3699
283	2.82	3.94111	1127.21	444.417	63.3851	1126.45	489.118	-69.663	1118.82	475.278	148.041	975.986	552.887	-164.964	952.895	548.852	-9.35419	930.002	522.256	285.078	719.39	458.678	159.018	855.088	303.19	151.628	889.08	360.27	111.248	929.213	296.642	30.1995	964.881	268.314	-289.007	705.839	479.628	-247.741	732.98	250.547	-186.685	756.666	260.449	-193.257	752.814	181.364	-169.67	732.69	95.8551
284	2.83	3.99973	1127.31	444.721	63.4419	1126.53	489.358	-69.635	1118.93	475.521	147.885	976.21	553.112	-164.972	952.917	548.896	-9.3581	930.019	522.359	284.733	720.007	457.845	157.372	857.11	304.811	151.269	891.19	362.018	110.329	931.792	298.931	29.3222	968.587	272.133	-288.997	705.836	479.631	-247.681	732.607	249.975	-186.696	756.654	260.468	-192.989	752.349	182.035	-169.872	732.45	96.1938
285	2.84	4.04579	1127.4	445.072	63.4951	1126.57	489.601	-69.6176	1119.03	475.781	147.738	976.542	553.208	-164.972	952.92	548.928	-9.35654	929.997	522.575	284.451	720.574	456.934	155.669	859.186	306.224	151.028	893.308	363.887	109.489	934.359	301.512	28.5505	972.223	275.826	-289.003	705.823	479.623	-247.723	732.72	250.202	-186.695	756.613	260.494	-193.096	752.511	181.803	-169.353	733.017	95.3555
286	2.85	4.07802	1127.47	445.356	63.5659	1126.6	489.833	-69.5827	1119.15	476.014	147.624	977.013	553.113	-164.961	952.921	548.954	-9.30686	929.978	522.749	284.249	721.171	456.038	153.992	861.216	307.743	150.906	895.672	365.925	108.642	936.991	304.201	27.8927	975.833	279.432	-289.007	705.832	479.632	-247.811	733.171	250.92	-186.659	756.587	260.516	-193.43	753.069	180.995	-169.209	733.157	95.1387
287	2.86	4.13762	1127.58	445.512	63.6579	1126.66	490.027	-69.5078	1119.26	476.163	147.52	977.291	553.261	-164.928	952.931	548.941	-9.24911	929.998	522.818	283.944	721.841	455.255	152.404	863.243	309.492	150.693	897.783	367.728	107.876	939.491	306.762	27.2966	979.377	283.02	-288.989	705.837	479.634	-247.772	733.042	250.735	-186.634	756.585	260.492	-193.327	752.931	181.184	-169.425	732.855	95.5401
288	2.87	4.16298	1127.78	445.578	63.7156	1126.75	490.18	-69.4893	1119.42	476.288	147.393	977.545	553.47	-164.928	952.981	548.944	-9.43745	930.217	522.743	283.357	722.485	454.311	150.75	865.415	310.943	150.545	899.867	369.549	107.126	942.031	309.411	26.5302	983.088	286.665	-288.96	705.859	479.641	-247.721	732.806	250.383	-186.649	756.617	260.483	-193.15	752.647	181.636	-169.769	732.472	96.1002
289	2.88	4.14642	1128.01	445.583	63.7222	1126.86	490.314	-69.5102	1119.62	476.431	147.24	977.82	553.701	-164.956	953.052	548.985	-9.94033	930.666	522.487	282.543	723.054	452.924	148.958	867.639	312.356	150.339	902.029	371.212	106.325	944.703	311.701	25.512	986.974	290.381	-288.967	705.864	479.647	-247.79	733.001	250.633	-186.701	756.65	260.491	-193.312	752.875	181.348	-169.599	732.736	95.8012
290	2.89	4.15101	1128.23	445.547	63.7305	1126.95	490.403	-69.4968	1119.76	476.543	147.072	978.07	553.914	-164.971	953.103	548.982	-10.0697	930.889	522.391	281.941	723.684	451.641	147.266	869.877	313.942	150.144	904.107	372.817	105.522	947.374	313.958	25.0709	990.312	293.797	-288.961	705.867	479.659	-247.735	732.58	250.033	-186.726	756.679	260.456	-193.03	752.384	182.072	-170.122	732.15	96.6472
291	2.9	4.24181	1128.39	445.534	63.7719	1127.01	490.465	-69.4269	1119.86	476.606	146.922	978.299	554.137	-164.96	953.151	548.92	-10.0506	930.989	522.363	281.35	724.391	450.658	145.635	872.051	315.743	150.095	906.188	374.559	104.805	950.039	316.536	25.1058	993.606	297.353	-288.921	705.873	479.676	-247.693	732.461	249.887	-186.706	756.676	260.402	-192.938	752.242	182.231	-170.234	731.994	96.8434
292	2.91	4.30765	1128.51	445.699	63.8092	1127.07	490.578	-69.3629	1119.97	476.744	146.764	978.524	554.356	-164.955	953.2	548.88	-10.0218	931.042	522.417	280.835	725.098	449.769	143.73	874.107	318.163	150.015	908.362	376.255	104.208	952.739	319.227	25.3013	997.178	301.048	-288.917	705.886	479.692	-247.707	732.435	249.867	-186.714	756.664	260.396	-192.941	752.208	182.274	-170.262	731.95	96.9242
293	2.92	4.32872	1128.6	445.863	63.8217	1127.11	490.677	-69.3195	1120.06	476.934	146.597	978.742	554.602	-164.967	953.258	548.888	-9.96506	930.817	522.606	280.311	725.731	448.681	141.631	875.905	321.919	149.882	910.478	377.992	103.592	955.481	321.96	25.1185	1001.2	304.764	-288.956	705.891	479.706	-247.746	732.416	249.88	-186.772	756.66	260.431	-192.997	752.199	182.33	-170.303	731.936	96.9494
294	2.93	4.39563	1128.7	446.013	63.8578	1127.13	490.719	-69.2606	1120.16	477.085	146.45	978.952	554.788	-164.961	953.295	548.87	-9.56475	930.346	523.401	279.66	726.409	447.349	139.83	878.107	324.4	149.863	912.607	379.885	103.001	958.188	324.656	25.1412	1005.23	308.796	-288.927	705.856	479.656	-247.803	732.614	250.188	-186.794	756.648	260.428	-193.174	752.469	181.931	-170.028	732.254	96.4616
295	2.94	4.49852	1128.77	446.182	63.938	1127.13	490.824	-69.1466	1120.25	477.244	146.326	979.164	554.955	-164.911	953.32	548.834	-8.60583	930.156	526.013	279.056	726.909	445.934	138.123	880.344	326.652	149.883	914.753	381.729	102.509	960.928	327.424	25.2976	1009.27	312.955	-288.885	705.861	479.661	-247.836	732.859	250.588	-186.776	756.603	260.458	-193.361	752.797	181.387	-169.657	732.641	95.8503
296	2.95	4.61455	1128.82	446.436	64.0666	1127.11	491.014	-69.0352	1120.35	477.399	146.213	979.361	555.196	-164.86	953.327	548.837	-7.60818	929.444	529.054	278.594	727.314	444.487	136.485	882.625	329.149	149.854	916.887	383.597	102.07	963.688	330.411	25.5796	1013.35	317.253	-288.872	705.877	479.7	-247.793	732.476	250.086	-186.779	756.567	260.53	-193.116	752.321	182.1	-170.139	732.072	96.6597
297	2.96	4.72169	1128.91	446.604	64.1795	1127.11	491.109	-68.9152	1120.48	477.485	146.091	979.587	555.457	-164.808	953.347	548.833	-7.36646	928.778	529.686	277.972	728.346	443.69	134.847	885.058	331.49	149.93	919.093	385.606	101.666	966.453	333.522	25.885	1017.47	321.48	-288.865	705.926	479.754	-247.775	732.372	249.957	-186.777	756.575	260.505	-193.069	752.233	182.288	-170.261	731.937	96.8758
298	2.97	4.86145	1129.01	446.695	64.3267	1127.1	491.167	-68.7714	1120.59	477.514	145.965	979.815	555.673	-164.745	953.382	548.777	-7.2333	928.717	529.76	277.248	729.153	442.5	133.327	887.574	333.767	150.055	921.303	387.474	101.318	969.33	336.56	26.1492	1021.57	325.536	-288.824	705.979	479.776	-247.749	732.334	249.858	-186.747	756.579	260.459	-193.023	752.24	182.283	-169.982	732.245	96.4186
299	2.98	5.00702	1129.12	446.766	64.4763	1127.13	491.228	-68.6284	1120.69	477.586	145.842	980.073	555.921	-164.688	953.428	548.725	-7.07798	928.726	529.945	276.559	729.753	441.071	131.863	890.106	336.06	149.948	923.598	389.077	101.004	972.15	339.709	26.5612	1025.64	329.853	-288.794	706.03	479.833	-247.733	732.319	249.878	-186.744	756.591	260.484	-193.002	752.241	182.308	-169.605	732.663	95.8534
300	2.99	5.1431	1129.23	446.871	64.5719	1127.18	491.253	-68.4927	1120.82	477.647	145.654	980.049	555.861	-164.656	953.509	548.695	-6.92838	928.739	530.232	275.894	730.2	439.209	130.439	892.62	338.573	149.827	925.708	390.982	100.638	974.937	342.995	27.2594	1029.65	334.179	-288.814	706.055	479.907	-247.753	732.322	249.931	-186.757	756.626	260.507	-193.026	752.239	182.352	-169.814	732.444	96.226
301	3	5.2391	1129.35	446.873	64.6322	1127.25	491.22	-68.3753	1120.92	477.674	145.373	979.723	555.431	-164.634	953.583	548.625	-6.85877	928.754	530.28	275.069	730.978	437.662	129.008	895.195	340.843	149.793	927.687	393.038	100.271	977.715	346.091	27.8973	1033.3	338.112	-288.803	706.037	479.896	-247.784	732.339	249.9	-186.807	756.676	260.437	-193.038	752.219	182.338	-169.593	732.722	95.8622
302	3.01	5.34131	1129.43	446.919	64.7478	1127.27	491.258	-68.2594	1120.99	477.726	145.113	980.042	555.836	-164.605	953.633	548.564	-7.05912	928.69	529.713	274.278	731.721	436.464	127.741	897.666	343.251	149.818	929.586	395.17	99.8984	980.355	349.292	28.3368	1036.85	342.457	-288.793	705.973	479.842	-247.809	732.318	249.914	-186.845	756.679	260.43	-193.045	752.198	182.365	-169.844	732.453	96.2449
303	3.02	5.48598	1129.43	447.061	64.9046	1127.25	491.381	-68.133	1121.03	477.791	144.863	980.476	556.463	-164.556	953.663	548.52	-7.45044	928.601	528.694	273.526	732.506	435.28	126.61	899.864	345.878	149.946	931.44	397.289	99.5824	982.884	352.579	28.7261	1040.24	346.802	-288.794	705.95	479.832	-247.827	732.291	249.971	-186.857	756.628	260.473	-193.061	752.181	182.432	-169.625	732.692	95.872
304	3.03	5.65569	1129.41	447.151	65.0926	1127.2	491.531	-67.9917	1121.09	477.837	144.584	980.931	557.196	-164.485	953.672	548.472	-7.18367	928.674	529.276	272.715	733.219	433.986	125.6	901.999	348.507	150.176	933.25	399.335	99.2687	985.276	355.878	28.9974	1043.32	351.278	-288.764	705.968	479.836	-247.812	732.257	249.993	-186.851	756.584	260.505	-193.059	752.169	182.444	-170.125	732.092	96.6946
305	3.04	5.80378	1129.44	447.147	65.3	1127.17	491.679	-67.8602	1121.18	477.8	144.3	981.436	558.032	-164.418	953.678	548.435	-6.97978	929.004	529.574	271.934	733.873	432.885	124.605	904.237	350.742	150.489	935.023	401.518	98.9748	987.509	359.165	29.1726	1046.12	355.811	-288.713	705.998	479.815	-247.812	732.252	249.948	-186.836	756.589	260.469	-193.073	752.206	182.387	-170.244	731.959	96.8727
306	3.05	5.97039	1129.52	447.11	65.5025	1127.16	491.791	-67.7111	1121.25	477.769	144.061	982.017	558.903	-164.346	953.685	548.414	-6.68925	929.238	530.189	271.255	734.556	432.079	123.594	906.462	352.745	150.723	936.697	403.59	98.773	989.615	362.436	29.3464	1048.75	360.172	-288.673	706.051	479.887	-247.811	732.258	249.939	-186.807	756.586	260.455	-193.079	752.251	182.368	-170.267	731.938	96.929
307	3.06	6.18008	1129.58	447.056	65.7048	1127.15	491.937	-67.544	1121.31	477.77	143.789	982.617	559.9	-164.256	953.696	548.365	-6.32994	929.046	530.844	270.55	735.228	431.014	122.764	908.402	355.011	150.936	938.095	405.485	98.4733	991.61	365.599	29.4992	1051.13	364.477	-288.644	706.13	479.98	-247.789	732.255	249.929	-186.777	756.586	260.448	-193.053	752.275	182.37	-170.238	731.937	96.9039
308	3.07	6.39718	1129.67	446.969	65.866	1127.16	492.022	-67.3715	1121.35	477.74	143.877	982.815	559.719	-164.175	953.718	548.288	-6.2259	929.138	530.741	269.829	735.8	429.925	121.974	910.206	357.119	151.107	939.5	407.423	98.1733	993.412	368.647	29.4433	1053.22	369.045	-288.609	706.169	479.968	-247.771	732.248	249.927	-186.761	756.593	260.407	-193.029	752.284	182.297	-170.196	731.943	96.8483
309	3.08	6.55705	1129.74	446.977	65.9704	1127.22	492.111	-67.2469	1121.42	477.732	144.541	982.436	557.653	-164.163	953.762	548.238	-6.20873	929.257	530.633	269.104	736.408	429.06	121.193	911.92	359.289	151.171	940.756	409.224	97.7282	995.091	371.515	29.202	1055.37	373.764	-288.588	706.167	479.951	-247.801	732.258	249.944	-186.786	756.621	260.377	-193.054	752.293	182.313	-170.211	731.963	96.878
310	3.09	6.6518	1129.84	446.999	66.0286	1127.3	492.203	-67.1886	1121.46	477.758	144.567	982.535	557.286	-164.193	953.811	548.232	-6.20343	929.263	530.872	268.389	737.019	428.276	120.325	913.457	361.244	151.155	941.866	410.931	97.2642	996.617	374.262	29.0258	1057.2	377.928	-288.615	706.159	479.998	-247.853	732.269	249.974	-186.849	756.635	260.415	-193.098	752.264	182.415	-170.259	731.96	96.9265
311	3.1	6.7823	1129.86	447.057	66.1068	1127.35	492.255	-67.0984	1121.48	477.75	144.457	982.712	557.292	-164.192	953.821	548.205	-6.4921	929.238	530.1	267.702	737.515	427.498	119.619	914.807	363.175	151.106	942.866	412.588	96.8757	997.989	376.98	28.7789	1058.67	381.816	-288.604	706.105	479.963	-247.872	732.228	249.965	-186.89	756.605	260.45	-193.114	752.239	182.402	-170.286	731.931	96.9519
312	3.11	6.98673	1129.84	447.274	66.2318	1127.36	492.382	-66.9405	1121.47	477.785	144.339	982.901	557.446	-164.168	953.82	548.187	-7.10581	929.236	528.359	267.061	737.9	426.779	118.969	916.051	364.833	151.046	943.732	414.175	96.4364	999.151	379.476	28.5684	1059.82	385.563	-288.589	706.055	479.925	-247.87	732.18	249.99	-186.884	756.568	260.452	-193.118	752.19	182.383	-169.989	732.232	96.4908
313	3.12	7.15398	1129.86	447.494	66.3498	1127.37	492.569	-66.8009	1121.5	477.849	144.228	983.064	557.618	-164.151	953.835	548.22	-7.01086	929.237	528.637	266.538	738.3	426.272	118.354	917.115	366.62	150.979	944.431	415.673	96.0313	1000.17	382.014	28.1909	1060.9	388.964	-288.607	706.051	479.941	-247.878	732.178	250.065	-186.889	756.542	260.474	-193.135	752.197	182.429	-169.637	732.637	95.9392
314	3.13	7.306	1129.93	447.602	66.4611	1127.39	492.712	-66.6552	1121.57	477.834	144.138	983.198	557.726	-164.115	953.859	548.181	-6.78536	929.312	529.155	266.034	738.716	425.809	117.803	918.106	368.314	150.95	945.032	417.144	95.6129	1001.09	384.369	27.7142	1061.74	392.138	-288.6	706.094	479.987	-247.876	732.197	250.037	-186.878	756.547	260.478	-193.126	752.246	182.441	-170.105	732.109	96.6839
315	3.14	7.49794	1129.99	447.607	66.6068	1127.4	492.815	-66.4528	1121.63	477.78	144.086	983.301	557.811	-164.041	953.872	548.115	-6.63872	929.502	529.223	265.559	739.064	425.395	117.245	919.072	369.487	150.911	945.557	418.403	95.1985	1001.82	386.502	27.2256	1062.28	395.255	-288.55	706.136	479.995	-247.826	732.202	249.969	-186.824	756.546	260.429	-193.064	752.276	182.38	-170.172	731.992	96.8163
316	3.15	7.70106	1129.96	447.798	66.7504	1127.4	492.963	-66.2748	1121.64	477.818	144.057	983.379	557.919	-163.978	953.861	548.101	-6.53772	929.647	529.314	265.169	739.305	425.127	116.748	919.704	370.961	150.824	946.008	419.614	94.7476	1002.45	388.523	26.714	1062.64	398.185	-288.529	706.179	480.018	-247.781	732.183	249.995	-186.787	756.531	260.417	-193.018	752.296	182.394	-170.161	731.949	96.89
317	3.16	7.81634	1129.96	447.991	66.8465	1127.42	493.134	-66.1693	1121.68	477.887	143.995	983.476	558.064	-163.97	953.876	548.151	-6.46683	929.687	529.637	264.802	739.499	424.856	116.256	920.189	372.604	150.712	946.425	420.822	94.2792	1002.97	390.528	26.1981	1062.83	401.029	-288.544	706.189	480.067	-247.807	732.171	250.068	-186.803	756.514	260.506	-193.039	752.325	182.471	-170.154	731.949	96.9496
318	3.17	7.90119	1130.03	448.008	66.8987	1127.44	493.203	-66.1011	1121.75	477.847	143.912	983.569	558.205	-163.996	953.909	548.162	-6.42898	929.703	529.808	264.399	739.684	424.502	115.717	920.714	373.804	150.527	946.799	421.88	93.7295	1003.4	392.216	25.5025	1062.94	403.541	-288.542	706.163	480.068	-247.833	732.165	250.048	-186.824	756.522	260.487	-193.063	752.334	182.488	-170.167	731.971	96.9318
319	3.18	8.02186	1130.06	448.081	66.9421	1127.45	493.216	-66.0116	1121.79	477.846	143.836	983.666	558.321	-164.015	953.929	548.146	-6.38766	929.762	529.794	264.007	739.865	424.206	115.164	921.245	374.645	150.298	947.055	422.827	93.1994	1003.71	393.743	24.8618	1063	406.035	-288.54	706.146	480.029	-247.838	732.161	250.058	-186.826	756.529	260.446	-193.042	752.322	182.487	-170.156	731.964	96.9207
320	3.19	8.11884	1130.06	448.246	66.9967	1127.45	493.318	-65.9223	1121.82	477.925	143.774	983.75	558.46	-164.038	953.936	548.177	-6.35594	929.764	529.983	263.655	740.018	423.984	114.65	921.531	375.698	150.05	947.184	423.683	92.7085	1003.92	395.37	24.2402	1062.92	408.53	-288.565	706.142	480.061	-247.862	732.141	250.134	-186.846	756.488	260.511	-193.05	752.309	182.535	-170.152	731.95	96.962
321	3.2	8.1602	1130.09	448.324	67.0208	1127.48	493.398	-65.8806	1121.84	477.977	143.701	983.807	558.632	-164.081	953.953	548.223	-6.34996	929.733	530.256	263.325	740.142	423.88	114.155	921.724	376.722	149.792	947.227	424.531	92.1904	1004.09	397.009	23.6186	1062.81	410.821	-288.592	706.141	480.106	-247.891	732.127	250.151	-186.886	756.49	260.576	-193.068	752.306	182.578	-170.152	731.947	97.0069
322	3.21	8.21036	1130.16	448.242	67.0459	1127.49	493.403	-65.8366	1121.88	477.979	143.636	983.851	558.748	-164.111	953.979	548.211	-6.37574	929.815	530.099	262.991	740.255	423.783	113.754	921.914	377.494	149.551	947.225	425.33	91.6962	1004.27	398.313	22.9289	1062.65	412.914	-288.569	706.122	480.067	-247.892	732.123	250.111	-186.906	756.511	260.52	-193.081	752.331	182.511	-170.128	731.958	96.9876
323	3.22	8.28833	1130.17	448.266	67.1158	1127.49	493.485	-65.7741	1121.9	478.022	143.616	983.861	558.866	-164.119	953.991	548.22	-6.39536	929.913	529.985	262.732	740.324	423.752	113.406	922.084	378.382	149.284	947.195	426.256	91.168	1004.31	399.629	22.3127	1062.42	414.935	-288.551	706.15	480.101	-247.87	732.128	250.096	-186.89	756.499	260.498	-193.08	752.354	182.486	-170.095	731.958	96.9616
324	3.23	8.34715	1130.11	448.425	67.1993	1127.47	493.651	-65.7256	1121.91	478.132	143.62	983.874	558.984	-164.108	953.989	548.262	-6.40434	929.925	530.102	262.544	740.354	423.727	113.15	922.187	379.425	148.988	947.15	427.196	90.6434	1004.3	400.897	21.7224	1062.14	416.915	-288.549	706.201	480.138	-247.864	732.129	250.146	-186.866	756.469	260.516	-193.073	752.367	182.548	-170.056	731.965	96.9754
325	3.24	8.41151	1130.09	448.501	67.2609	1127.46	493.728	-65.6603	1121.92	478.185	143.628	983.887	559.102	-164.097	954.003	548.284	-6.43086	930.006	530.051	262.371	740.385	423.683	112.898	922.3	380.261	148.687	947.077	428.028	90.1818	1004.24	402.193	21.133	1061.83	418.732	-288.55	706.232	480.154	-247.859	732.136	250.133	-186.863	756.473	260.523	-193.067	752.406	182.566	-170.025	731.984	96.9923
326	3.25	8.46028	1130.1	448.514	67.3139	1127.45	493.751	-65.6119	1121.94	478.154	143.638	983.902	559.222	-164.095	954.016	548.266	-6.445	930.064	529.943	262.193	740.419	423.691	112.669	922.412	380.843	148.348	946.906	428.866	89.7735	1004.16	403.421	20.5681	1061.54	420.346	-288.542	706.211	480.128	-247.863	732.125	250.118	-186.864	756.467	260.525	-193.065	752.441	182.546	-170	731.987	96.9813
327	3.26	8.48778	1130.07	448.587	67.373	1127.44	493.842	-65.5791	1121.94	478.205	143.653	983.908	559.353	-164.101	954.008	548.295	-6.43295	930.001	530.107	262.041	740.425	423.708	112.465	922.458	381.374	148.025	946.727	429.683	89.3604	1004.03	404.682	20.001	1061.19	421.892	-288.562	706.192	480.121	-247.903	732.315	250.467	-186.864	756.449	260.524	-193.224	752.677	182.194	-169.664	732.294	96.5397
328	3.27	8.50087	1130.05	448.664	67.3924	1127.43	493.924	-65.5614	1121.92	478.312	143.666	983.911	559.463	-164.114	953.991	548.322	-6.43593	929.943	530.208	261.886	740.414	423.665	112.272	922.461	381.859	147.704	946.584	430.397	88.8879	1003.85	405.899	19.4123	1060.79	423.273	-288.582	706.158	480.138	-247.994	732.765	251.192	-186.873	756.431	260.547	-193.592	753.217	181.381	-168.979	733	95.5197
329	3.28	8.50692	1130.06	448.674	67.3788	1127.45	493.962	-65.5635	1121.93	478.358	143.672	984.078	559.686	-164.151	954.008	548.346	-6.47715	929.953	530.071	261.72	740.412	423.664	112.07	922.52	382.172	147.346	946.456	431.071	88.4306	1003.7	406.854	18.8346	1060.4	424.43	-288.576	706.135	480.116	-247.988	732.681	251.044	-186.884	756.432	260.552	-193.552	753.101	181.56	-169.102	732.862	95.7225
330	3.29	8.49018	1130.13	448.626	67.3595	1127.47	493.958	-65.5529	1121.95	478.421	143.697	984.414	560.052	-164.193	954.042	548.397	-6.55194	929.961	529.983	261.586	740.454	423.672	111.845	922.562	382.501	147.002	946.294	431.697	87.8957	1003.51	407.792	18.2371	1060.05	425.325	-288.569	706.144	480.088	-247.936	732.262	250.401	-186.895	756.458	260.562	-193.223	752.597	182.364	-169.732	732.202	96.7061
[truncated: 354 more rows]

## Sheet: Trial02
PathFileType	4	(X/Y/Z)	Trial02.trc
DataRate	CameraRate	NumFrames	NumMarkers	Units	OrigDataRate	OrigDataStartFrame	OrigNumFrames
[truncated: 695 more rows]

## Sheet: Trial03
PathFileType	4	(X/Y/Z)	Trial03.trc
[truncated: 826 more rows]

[truncated: 2 more sheets: Trial04, Trial05]
