# Supplementary material for: Upper-Limb Kinematic Variables are correlated with Fugl-Meyer Assessment Sub Scales During a Hand-to-Mouth Functional Task in Post-Stroke Individuals
Source: Research Square preprint supplement (doi:10.21203/rs.3.rs-8270137/v1), 2025-12-16
Supplement: Supplementary file 22 [file Additional file 3.xls]

## Sheet: Static
PathFileType	4	(X/Y/Z)	Static.trc
DataRate	CameraRate	NumFrames	NumMarkers	Units	OrigDataRate	OrigDataStartFrame	OrigNumFrames
100	100	567	17	mm	100	1	567
Frame#	Time	nasion			r zyg pr			l zyg pr			r should			l should			sternum			r elbow			r ulna			r radius			r hand			r finger			l elbow			l ulna			l radius			l hand			l finger
		X1	Y1	Z1	X2	Y2	Z2	X3	Y3	Z3	X4	Y4	Z4	X5	Y5	Z5	X6	Y6	Z6	X7	Y7	Z7	X8	Y8	Z8	X9	Y9	Z9	X10	Y10	Z10	X11	Y11	Z11	X12	Y12	Z12	X13	Y13	Z13	X14	Y14	Z14	X15	Y15	Z15	X16	Y16	Z16
1	0	558.557	1268.06	251.38	611.833	1254.15	185.951	596.863	1257.55	320.309	702.981	1132.57	123.035	696.743	1130.26	396.325	619.822	1064.58	257.804	701.106	812.383	29.8812	448.52	857.294	19.9571	453.483	856.982	88.538	375.399	864.979	54.8837	285.981	847.142	74.0257	702.778	823.218	488.017	446.788	849.405	499.349	452.479	860.172	427.765	376.006	866.129	458.181	285.985	849.483	451.338
2	0.01	558.54	1268	251.326	611.745	1254.11	185.911	596.681	1257.53	320.275	702.905	1132.53	122.996	696.699	1130.24	396.308	619.795	1064.58	257.721	701.072	812.262	29.8826	448.434	857.236	19.94	453.482	856.92	88.4822	375.345	864.983	54.8653	285.955	847.084	73.9889	702.747	823.19	488.006	446.788	849.381	499.323	452.483	860.118	427.773	376.01	866.089	458.153	285.932	849.413	451.309
3	0.02	558.551	1267.9	251.304	611.775	1254.04	185.873	596.687	1257.44	320.262	702.868	1132.49	122.978	696.689	1130.21	396.296	619.806	1064.54	257.709	701.014	812.195	29.8793	448.414	857.183	19.9348	453.477	856.846	88.4618	375.352	864.953	54.8569	285.967	846.995	73.9705	702.704	823.154	487.993	446.765	849.349	499.31	452.446	860.097	427.792	376.022	866.057	458.156	285.914	849.362	451.297
4	0.03	558.603	1267.81	251.332	611.816	1253.98	185.88	596.773	1257.33	320.284	702.89	1132.45	122.989	696.7	1130.19	396.309	619.881	1064.51	257.744	700.98	812.169	29.8943	448.493	857.109	19.924	453.526	856.789	88.4705	375.377	864.912	54.8795	285.986	846.955	73.9893	702.673	823.118	487.984	446.788	849.321	499.328	452.522	860.052	427.811	376.046	866.035	458.176	285.955	849.327	451.316
5	0.04	558.566	1267.79	251.343	611.792	1253.95	185.912	596.755	1257.32	320.312	702.857	1132.44	123.001	696.671	1130.21	396.312	619.957	1064.51	257.764	701.006	812.17	29.9036	448.52	857.088	19.933	453.532	856.789	88.4896	375.371	864.872	54.8868	285.98	846.953	74.0139	702.65	823.095	487.98	446.786	849.316	499.331	452.581	860.017	427.823	376.041	866.031	458.183	285.945	849.329	451.344
6	0.05	558.435	1267.82	251.346	611.67	1253.97	185.948	596.637	1257.36	320.323	702.796	1132.45	123.003	696.619	1130.24	396.292	619.863	1064.59	257.745	701.031	812.178	29.9219	448.482	857.106	19.9362	453.44	856.856	88.5142	375.333	864.864	54.886	285.974	846.96	74.0149	702.63	823.083	487.943	446.755	849.324	499.317	452.55	860.01	427.805	376.046	866.048	458.174	285.908	849.355	451.343
7	0.06	558.34	1267.87	251.368	611.622	1254	186.002	596.527	1257.39	320.32	702.803	1132.48	123.02	696.569	1130.26	396.293	619.771	1064.68	257.732	701.014	812.145	29.9353	448.433	857.148	19.9852	453.403	856.915	88.5392	375.351	864.892	54.9025	285.985	846.998	74.0178	702.637	823.087	487.943	446.78	849.328	499.319	452.579	860.019	427.777	376.05	866.064	458.176	285.907	849.388	451.345
8	0.07	558.334	1267.89	251.399	611.617	1254.02	185.998	596.537	1257.41	320.354	702.814	1132.52	123.009	696.563	1130.31	396.307	619.768	1064.75	257.75	700.998	812.174	29.9445	448.451	857.189	19.9847	453.449	856.964	88.5408	375.377	864.931	54.9151	286.01	847.046	74.034	702.666	823.109	487.943	446.832	849.359	499.323	452.608	860.054	427.783	376.076	866.099	458.181	285.94	849.431	451.364
9	0.08	558.306	1267.91	251.403	611.583	1254.06	185.981	596.544	1257.44	320.353	702.756	1132.55	122.983	696.548	1130.36	396.303	619.774	1064.81	257.722	701.027	812.223	29.9336	448.482	857.198	19.9391	453.465	856.994	88.5061	375.365	864.947	54.8842	286.012	847.061	74.0104	702.698	823.153	487.956	446.847	849.401	499.298	452.544	860.119	427.787	376.071	866.115	458.16	285.959	849.449	451.352
10	0.09	558.191	1267.93	251.401	611.503	1254.08	185.99	596.448	1257.47	320.347	702.729	1132.57	122.949	696.487	1130.37	396.268	619.668	1064.9	257.644	700.982	812.232	29.9087	448.479	857.205	19.8999	453.469	857.009	88.4547	375.344	864.951	54.8258	285.995	847.055	73.9626	702.718	823.165	487.944	446.786	849.417	499.27	452.426	860.149	427.737	376.025	866.115	458.132	285.897	849.46	451.312
11	0.1	558.142	1267.92	251.439	611.457	1254.04	186.043	596.424	1257.43	320.374	702.714	1132.58	122.96	696.444	1130.37	396.257	619.659	1064.91	257.638	700.965	812.265	29.8967	448.485	857.177	19.9053	453.448	856.995	88.446	375.323	864.942	54.835	286.004	847.052	73.9557	702.718	823.187	487.95	446.745	849.413	499.268	452.401	860.149	427.752	376.011	866.109	458.128	285.853	849.453	451.307
12	0.11	558.198	1267.87	251.498	611.466	1254.02	186.113	596.54	1257.34	320.424	702.719	1132.57	122.994	696.458	1130.37	396.282	619.787	1064.87	257.67	700.982	812.292	29.914	448.521	857.16	19.9204	453.456	856.96	88.4544	375.353	864.92	54.8661	286.014	847.033	73.9803	702.724	823.206	487.95	446.768	849.402	499.292	452.485	860.117	427.784	376.02	866.103	458.149	285.87	849.438	451.331
13	0.12	558.186	1267.81	251.534	611.407	1253.99	186.163	596.57	1257.28	320.455	702.716	1132.55	122.975	696.4	1130.33	396.271	619.775	1064.88	257.662	700.993	812.318	29.9101	448.486	857.135	19.9195	453.447	856.916	88.4687	375.365	864.902	54.8517	285.958	847.004	73.9949	702.708	823.18	487.929	446.735	849.367	499.304	452.447	860.093	427.785	375.987	866.077	458.152	285.843	849.397	451.325
14	0.13	558.128	1267.77	251.559	611.326	1253.97	186.193	596.536	1257.24	320.5	702.692	1132.53	122.969	696.341	1130.29	396.255	619.676	1064.9	257.645	701.02	812.321	29.8941	448.446	857.121	19.9165	453.409	856.886	88.4509	375.267	864.919	54.856	285.906	846.973	73.9912	702.685	823.185	487.935	446.688	849.329	499.29	452.409	860.065	427.77	375.95	866.054	458.149	285.8	849.358	451.31
15	0.14	558.165	1267.73	251.617	611.354	1253.97	186.217	596.551	1257.2	320.596	702.696	1132.54	122.993	696.361	1130.28	396.271	619.76	1064.88	257.663	701.06	812.332	29.9129	448.453	857.125	19.9249	453.416	856.858	88.4654	375.299	864.916	54.8704	285.939	846.942	73.9962	702.684	823.195	487.974	446.719	849.324	499.317	452.475	860.043	427.824	375.977	866.039	458.16	285.842	849.334	451.326
16	0.15	558.223	1267.72	251.678	611.394	1253.98	186.275	596.651	1257.18	320.67	702.731	1132.59	123.008	696.415	1130.27	396.287	619.856	1064.9	257.677	701.037	812.325	29.9562	448.504	857.139	19.9209	453.445	856.867	88.4906	375.354	864.917	54.8879	285.956	846.95	74.0053	702.709	823.198	487.969	446.79	849.34	499.34	452.63	860.051	427.844	376.032	866.039	458.17	285.91	849.331	451.333
17	0.16	558.168	1267.76	251.698	611.327	1254.01	186.322	596.628	1257.19	320.655	702.722	1132.58	122.979	696.377	1130.27	396.264	619.801	1064.99	257.651	701.037	812.314	29.9697	448.47	857.19	19.941	453.456	856.903	88.4814	375.351	864.927	54.8771	285.972	846.983	73.9889	702.681	823.188	487.953	446.801	849.345	499.304	452.596	860.042	427.801	376.035	866.04	458.157	285.899	849.346	451.321
18	0.17	558.081	1267.82	251.712	611.284	1254.07	186.354	596.526	1257.21	320.643	702.693	1132.59	122.959	696.299	1130.32	396.272	619.628	1065.11	257.629	701.108	812.324	29.9656	448.363	857.232	19.9578	453.41	856.981	88.4922	375.321	864.939	54.8573	285.948	847.042	73.9718	702.658	823.158	487.922	446.792	849.354	499.264	452.541	860.047	427.742	376.033	866.064	458.132	285.89	849.394	451.313
19	0.18	558.065	1267.86	251.774	611.273	1254.12	186.407	596.529	1257.24	320.708	702.646	1132.62	122.999	696.289	1130.35	396.303	619.559	1065.22	257.683	701.072	812.358	29.9695	448.416	857.221	19.9699	453.412	857.061	88.545	375.323	864.963	54.8783	285.983	847.099	73.9855	702.664	823.16	487.911	446.821	849.363	499.281	452.552	860.078	427.764	376.089	866.095	458.151	285.946	849.423	451.346
20	0.19	558.055	1267.9	251.859	611.29	1254.14	186.496	596.528	1257.27	320.768	702.631	1132.64	123.054	696.32	1130.38	396.354	619.589	1065.29	257.738	701.043	812.393	29.9851	448.441	857.232	19.9977	453.423	857.124	88.5937	375.345	864.956	54.9149	285.997	847.118	74.033	702.65	823.175	487.928	446.844	849.37	499.304	452.56	860.074	427.795	376.093	866.117	458.176	285.968	849.457	451.381
21	0.2	557.961	1267.92	251.884	611.242	1254.14	186.547	596.503	1257.25	320.813	702.602	1132.66	123.064	696.267	1130.39	396.355	619.515	1065.35	257.736	701.09	812.468	30.0197	448.429	857.221	20.0008	453.345	857.127	88.6167	375.305	864.942	54.8973	285.94	847.108	74.0379	702.623	823.174	487.94	446.788	849.367	499.292	452.495	860.069	427.771	376.04	866.12	458.164	285.904	849.47	451.371
22	0.21	557.951	1267.89	251.865	611.22	1254.12	186.513	596.528	1257.2	320.822	702.549	1132.68	123.061	696.17	1130.4	396.322	619.49	1065.36	257.689	701.08	812.513	30.0276	448.414	857.202	19.9692	453.34	857.048	88.5631	375.272	864.939	54.8586	285.905	847.051	73.9914	702.647	823.187	487.929	446.721	849.373	499.262	452.355	860.107	427.736	375.989	866.105	458.126	285.823	849.439	451.322
23	0.22	558.119	1267.78	251.87	611.317	1254.06	186.508	596.636	1257.13	320.834	702.556	1132.7	123.092	696.173	1130.37	396.331	619.62	1065.29	257.66	701.084	812.564	30.0432	448.466	857.172	19.9403	453.458	856.92	88.4999	375.33	864.898	54.8576	285.947	846.959	73.9578	702.669	823.221	487.923	446.726	849.378	499.275	452.383	860.113	427.748	375.965	866.068	458.12	285.804	849.387	451.299
24	0.23	558.242	1267.71	251.888	611.382	1254.03	186.519	596.741	1257.06	320.86	702.587	1132.74	123.123	696.199	1130.36	396.356	619.768	1065.24	257.661	701.013	812.593	30.0339	448.529	857.15	19.9	453.518	856.86	88.475	375.363	864.888	54.8757	286.005	846.911	73.9325	702.65	823.225	487.908	446.759	849.395	499.295	452.476	860.12	427.772	375.96	866.042	458.119	285.828	849.351	451.299
25	0.24	558.226	1267.71	251.888	611.359	1254	186.533	596.662	1257.05	320.858	702.538	1132.8	123.117	696.137	1130.37	396.359	619.758	1065.28	257.647	700.975	812.627	30.0256	448.523	857.143	19.8592	453.531	856.845	88.4247	375.315	864.894	54.8461	285.955	846.909	73.9048	702.626	823.228	487.912	446.741	849.402	499.287	452.466	860.093	427.734	375.933	866.039	458.111	285.822	849.339	451.288
26	0.25	558.182	1267.76	251.897	611.341	1253.99	186.597	596.573	1257.05	320.879	702.518	1132.81	123.133	696.119	1130.38	396.363	619.706	1065.37	257.637	701.009	812.68	30.0168	448.52	857.149	19.8433	453.465	856.884	88.404	375.318	864.889	54.8311	285.932	846.937	73.9014	702.582	823.222	487.933	446.709	849.403	499.277	452.418	860.096	427.717	375.917	866.056	458.104	285.805	849.347	451.281
27	0.26	558.198	1267.79	251.954	611.375	1254.02	186.669	596.623	1257.03	320.931	702.538	1132.8	123.172	696.157	1130.39	396.411	619.667	1065.46	257.709	701.044	812.735	30.0202	448.477	857.175	19.9218	453.444	856.958	88.4732	375.348	864.909	54.8592	285.959	846.982	73.9748	702.578	823.206	487.931	446.738	849.395	499.302	452.511	860.06	427.758	375.97	866.069	458.14	285.865	849.366	451.318
28	0.27	558.159	1267.84	252.02	611.317	1254.05	186.765	596.637	1257.03	320.983	702.576	1132.8	123.205	696.214	1130.42	396.478	619.59	1065.53	257.789	701.02	812.711	30.0395	448.421	857.187	19.9973	453.435	857.039	88.5324	375.355	864.923	54.9003	285.99	847.023	74.0403	702.62	823.191	487.944	446.782	849.382	499.315	452.604	860.022	427.81	376.028	866.08	458.163	285.907	849.393	451.361
29	0.28	558.082	1267.89	252.056	611.247	1254.1	186.835	596.553	1257.04	321.004	702.539	1132.8	123.194	696.164	1130.43	396.49	619.465	1065.63	257.81	701.009	812.724	30.0403	448.332	857.218	20.0178	453.376	857.112	88.5627	375.335	864.924	54.901	285.924	847.085	74.0478	702.676	823.201	487.938	446.753	849.353	499.291	452.545	860.018	427.788	376.047	866.099	458.152	285.901	849.414	451.351
30	0.29	558.09	1267.92	252.068	611.288	1254.12	186.844	596.509	1257.05	321.032	702.52	1132.84	123.224	696.146	1130.43	396.518	619.408	1065.7	257.826	701.061	812.785	30.0322	448.345	857.245	20.02	453.357	857.125	88.5953	375.304	864.938	54.8999	285.89	847.115	74.0515	702.702	823.215	487.948	446.722	849.328	499.29	452.549	860.011	427.79	376.054	866.095	458.153	285.888	849.424	451.351
31	0.3	558.151	1267.91	252.093	611.393	1254.13	186.881	596.594	1257.06	321.073	702.56	1132.85	123.257	696.214	1130.41	396.568	619.517	1065.72	257.855	701.086	812.831	30.063	448.391	857.238	20.0353	453.383	857.083	88.636	375.313	864.943	54.9447	285.934	847.082	74.0582	702.724	823.224	487.96	446.763	849.335	499.335	452.644	860.036	427.83	376.077	866.094	458.178	285.903	849.425	451.379
32	0.31	558.199	1267.9	252.087	611.452	1254.13	186.868	596.663	1257.08	321.09	702.584	1132.88	123.28	696.18	1130.4	396.563	619.6	1065.72	257.815	701.105	812.879	30.065	448.421	857.24	20.0218	453.433	857.034	88.59	375.352	864.928	54.9452	285.959	847.022	74.038	702.669	823.2	487.944	446.785	849.358	499.328	452.614	860.112	427.84	376.058	866.086	458.171	285.885	849.412	451.366
33	0.32	558.194	1267.9	252.038	611.55	1254.09	186.791	596.677	1257.08	321.052	702.534	1132.91	123.264	696.083	1130.37	396.506	619.53	1065.71	257.733	701.094	812.888	30.0583	448.446	857.245	19.9593	453.445	856.984	88.5008	375.329	864.92	54.9003	285.972	846.981	73.9617	702.637	823.189	487.938	446.742	849.382	499.279	452.417	860.182	427.783	375.995	866.074	458.123	285.844	849.389	451.304
34	0.33	558.234	1267.9	252.017	611.626	1254.07	186.766	596.715	1257.08	321.035	702.49	1132.93	123.231	696.031	1130.37	396.504	619.424	1065.69	257.717	701.061	812.883	30.0473	448.459	857.221	19.9332	453.413	856.946	88.4683	375.306	864.926	54.8786	285.985	846.953	73.9247	702.659	823.194	487.964	446.722	849.393	499.259	452.351	860.163	427.735	375.938	866.065	458.091	285.809	849.378	451.261
35	0.34	558.297	1267.89	252.048	611.642	1254.03	186.826	596.824	1257.07	321.107	702.474	1132.93	123.265	696.025	1130.39	396.556	619.397	1065.65	257.794	701.027	812.856	30.0719	448.472	857.225	19.9638	453.431	856.93	88.4974	375.331	864.917	54.9037	286.016	846.951	73.95	702.681	823.205	487.958	446.776	849.4	499.295	452.487	860.146	427.791	375.948	866.064	458.121	285.838	849.374	451.289
36	0.35	558.32	1267.9	252.085	611.636	1254.05	186.872	596.847	1257.07	321.156	702.477	1132.95	123.288	695.995	1130.4	396.577	619.322	1065.65	257.847	701.049	812.862	30.1029	448.466	857.225	19.9927	453.442	856.936	88.5326	375.346	864.902	54.9111	286.005	846.944	73.9621	702.661	823.197	487.949	446.777	849.378	499.319	452.554	860.129	427.804	375.963	866.059	458.128	285.854	849.383	451.317
37	0.36	558.26	1267.92	252.093	611.628	1254.1	186.882	596.778	1257.07	321.158	702.418	1132.92	123.281	695.94	1130.42	396.555	619.125	1065.7	257.841	701.069	812.894	30.1047	448.406	857.224	19.9923	453.378	856.979	88.5449	375.318	864.898	54.8871	285.927	846.967	73.9776	702.66	823.21	487.961	446.714	849.341	499.297	452.441	860.089	427.769	375.96	866.06	458.121	285.846	849.382	451.305
38	0.37	558.196	1267.96	252.122	611.605	1254.15	186.919	596.8	1257.08	321.178	702.393	1132.9	123.316	695.862	1130.43	396.571	619.034	1065.74	257.867	701.071	812.906	30.1211	448.368	857.226	20.0094	453.349	857.024	88.5713	375.296	864.894	54.9104	285.908	847.009	74.0097	702.635	823.207	487.953	446.723	849.313	499.306	452.431	860.055	427.792	375.976	866.06	458.14	285.846	849.376	451.321
39	0.38	558.211	1267.99	252.182	611.618	1254.17	186.978	596.85	1257.08	321.246	702.413	1132.93	123.375	695.859	1130.45	396.631	619.082	1065.76	257.937	701.056	812.894	30.1451	448.412	857.234	20.0321	453.41	857.046	88.6145	375.343	864.89	54.9443	285.934	847.032	74.0384	702.636	823.216	487.963	446.767	849.317	499.347	452.563	860.037	427.835	376.028	866.066	458.173	285.877	849.393	451.369
40	0.39	558.28	1268.01	252.197	611.645	1254.19	186.986	596.846	1257.11	321.269	702.4	1132.96	123.375	695.863	1130.49	396.653	619.05	1065.8	257.947	701.043	812.925	30.1703	448.419	857.238	20.0212	453.392	857.08	88.6306	375.346	864.897	54.927	285.967	847.032	74.0382	702.614	823.216	487.969	446.773	849.333	499.355	452.573	860.038	427.843	376.045	866.079	458.173	285.906	849.405	451.386
41	0.4	558.269	1268.03	252.165	611.66	1254.2	186.948	596.783	1257.15	321.234	702.359	1133	123.352	695.845	1130.51	396.625	618.948	1065.84	257.896	701.052	812.959	30.1661	448.405	857.256	19.9761	453.33	857.09	88.5919	375.305	864.924	54.8988	285.942	847.042	73.9968	702.608	823.232	487.953	446.744	849.345	499.324	452.455	860.059	427.817	376.035	866.086	458.148	285.893	849.408	451.345
42	0.41	558.254	1268.04	252.148	611.68	1254.18	186.917	596.797	1257.16	321.205	702.365	1133.04	123.339	695.809	1130.52	396.621	618.938	1065.88	257.877	701.062	812.998	30.1506	448.414	857.267	19.9716	453.304	857.083	88.5813	375.275	864.934	54.8888	285.946	847.018	73.9779	702.602	823.243	487.942	446.747	849.366	499.317	452.447	860.102	427.829	376.014	866.086	458.14	285.886	849.397	451.323
43	0.42	558.312	1268.02	252.158	611.68	1254.19	186.915	596.895	1257.13	321.225	702.394	1133.06	123.349	695.814	1130.54	396.641	619.022	1065.86	257.878	701.061	813.027	30.1733	448.416	857.263	19.9986	453.35	857.048	88.5923	375.308	864.933	54.9113	285.97	846.993	73.9859	702.577	823.251	487.963	446.763	849.386	499.335	452.52	860.121	427.845	375.991	866.094	458.15	285.891	849.396	451.331
44	0.43	558.317	1268	252.151	611.656	1254.2	186.911	596.858	1257.11	321.217	702.386	1133.08	123.352	695.811	1130.54	396.634	619.024	1065.86	257.857	701.052	813.085	30.1832	448.406	857.268	19.9993	453.394	857.043	88.5644	375.32	864.933	54.9063	285.949	846.986	73.9867	702.606	823.303	487.956	446.742	849.385	499.339	452.517	860.121	427.819	375.983	866.089	458.147	285.852	849.41	451.321
45	0.44	558.241	1268.01	252.137	611.629	1254.19	186.947	596.863	1257.12	321.197	702.343	1133.07	123.346	695.749	1130.56	396.628	618.929	1065.89	257.845	701.081	813.139	30.186	448.375	857.266	20.0068	453.358	857.047	88.5596	375.289	864.93	54.8894	285.922	846.984	73.9841	702.654	823.34	487.944	446.702	849.381	499.32	452.443	860.127	427.802	375.961	866.076	458.132	285.79	849.405	451.308
46	0.45	558.262	1267.97	252.135	611.65	1254.15	186.961	596.892	1257.11	321.202	702.316	1133.07	123.364	695.732	1130.54	396.64	618.883	1065.9	257.877	701.135	813.191	30.1966	448.392	857.245	20.0125	453.346	857.038	88.5751	375.26	864.928	54.9106	285.913	846.946	73.9892	702.664	823.325	487.954	446.721	849.365	499.323	452.454	860.146	427.797	375.951	866.07	458.148	285.787	849.4	451.319
47	0.46	558.356	1267.94	252.131	611.734	1254.1	186.91	596.966	1257.09	321.219	702.349	1133.07	123.361	695.759	1130.53	396.666	618.978	1065.88	257.905	701.094	813.126	30.1983	448.437	857.243	20.0189	453.407	857.012	88.5692	375.29	864.922	54.9199	285.935	846.949	73.9915	702.633	823.298	487.961	446.755	849.35	499.351	452.502	860.139	427.834	375.988	866.063	458.162	285.852	849.382	451.331
48	0.47	558.345	1267.96	252.107	611.782	1254.11	186.85	596.924	1257.14	321.193	702.343	1133.08	123.34	695.788	1130.51	396.665	618.94	1065.93	257.888	701.096	813.09	30.1871	448.422	857.232	19.9842	453.387	857.038	88.5569	375.305	864.917	54.8949	285.941	846.967	73.976	702.626	823.27	487.966	446.763	849.342	499.331	452.505	860.1	427.817	375.985	866.054	458.159	285.867	849.376	451.322
49	0.48	558.237	1268	252.078	611.748	1254.16	186.84	596.823	1257.17	321.154	702.372	1133.08	123.322	695.813	1130.53	396.658	618.774	1066.04	257.883	701.1	813.078	30.1665	448.393	857.256	19.9899	453.342	857.086	88.551	375.267	864.937	54.8843	285.91	847.01	73.969	702.683	823.277	487.964	446.769	849.33	499.304	452.475	860.084	427.786	375.981	866.066	458.151	285.854	849.38	451.31
50	0.49	558.223	1268.02	252.081	611.694	1254.16	186.861	596.787	1257.21	321.156	702.441	1133.09	123.316	695.828	1130.52	396.651	618.736	1066.12	257.901	701.096	813.066	30.1679	448.396	857.277	19.9951	453.299	857.119	88.579	375.275	864.949	54.8945	285.875	847.063	74.0032	702.703	823.254	487.962	446.792	849.327	499.341	452.577	860.063	427.825	376.009	866.075	458.162	285.895	849.385	451.342
51	0.5	558.298	1268.01	252.09	611.722	1254.16	186.853	596.86	1257.18	321.173	702.452	1133.08	123.325	695.873	1130.49	396.665	618.805	1066.13	257.917	701.065	813.041	30.1425	448.418	857.265	19.9883	453.334	857.137	88.5934	375.322	864.938	54.914	285.914	847.072	74.0182	702.675	823.226	487.961	446.807	849.328	499.371	452.61	860.058	427.877	376.05	866.078	458.19	285.944	849.389	451.375
52	0.51	558.309	1267.99	252.065	611.7	1254.16	186.852	596.838	1257.14	321.171	702.441	1133.04	123.303	695.857	1130.48	396.661	618.804	1066.14	257.893	701.094	813.046	30.1231	448.404	857.274	19.9969	453.314	857.148	88.6002	375.331	864.927	54.9132	285.908	847.065	74.0162	702.625	823.215	487.958	446.783	849.315	499.356	452.58	860.044	427.879	376.058	866.071	458.187	285.928	849.387	451.386
53	0.52	558.298	1267.97	252.037	611.69	1254.13	186.858	596.815	1257.13	321.124	702.44	1133.03	123.278	695.82	1130.48	396.647	618.759	1066.14	257.875	701.076	813.031	30.1026	448.38	857.256	20.004	453.303	857.13	88.5976	375.295	864.92	54.9131	285.891	847.041	74.018	702.639	823.23	487.961	446.732	849.301	499.342	452.544	860.047	427.841	375.999	866.077	458.164	285.873	849.389	451.371
54	0.53	558.357	1267.93	252.032	611.785	1254.07	186.811	596.868	1257.11	321.101	702.485	1133.03	123.284	695.826	1130.49	396.652	618.794	1066.12	257.877	701.094	813.082	30.075	448.424	857.199	20.0067	453.37	857.065	88.596	375.283	864.901	54.9357	285.915	847.019	74.0377	702.656	823.258	487.971	446.715	849.307	499.353	452.547	860.077	427.868	375.997	866.077	458.175	285.854	849.399	451.371
55	0.54	558.421	1267.89	252.02	611.808	1254.06	186.762	596.92	1257.08	321.099	702.491	1133.05	123.3	695.843	1130.5	396.649	618.906	1066.09	257.857	701.045	813.08	30.082	448.438	857.193	20.0139	453.398	856.995	88.5945	375.315	864.881	54.9337	285.964	846.966	74.0242	702.628	823.266	487.965	446.727	849.322	499.366	452.573	860.094	427.878	376.01	866.073	458.175	285.856	849.398	451.361
56	0.55	558.41	1267.88	251.965	611.817	1254.04	186.689	596.876	1257.04	321.06	702.475	1133.06	123.259	695.817	1130.52	396.609	618.958	1066.09	257.8	701.04	813.087	30.0763	448.429	857.2	19.9886	453.408	856.95	88.5471	375.31	864.872	54.9096	285.996	846.924	73.9812	702.579	823.274	487.932	446.711	849.352	499.365	452.494	860.124	427.868	375.963	866.064	458.155	285.801	849.391	451.326
57	0.56	558.377	1267.89	251.9	611.832	1254.03	186.629	596.825	1257.07	320.976	702.478	1133.1	123.196	695.774	1130.52	396.553	618.933	1066.16	257.713	701.049	813.117	30.0704	448.47	857.211	19.9362	453.442	856.944	88.4892	375.283	864.893	54.8796	286.001	846.912	73.937	702.596	823.304	487.936	446.705	849.384	499.353	452.391	860.156	427.835	375.928	866.071	458.138	285.763	849.393	451.289
58	0.57	558.398	1267.91	251.876	611.87	1254.06	186.565	596.848	1257.13	320.914	702.505	1133.1	123.17	695.773	1130.54	396.523	618.943	1066.24	257.659	701.058	813.092	30.0719	448.457	857.219	19.906	453.463	856.962	88.4598	375.282	864.917	54.8705	285.978	846.938	73.9277	702.619	823.329	487.949	446.749	849.396	499.343	452.39	860.179	427.838	375.928	866.074	458.141	285.797	849.397	451.283
59	0.58	558.388	1267.96	251.869	611.896	1254.11	186.537	596.805	1257.17	320.887	702.568	1133.1	123.137	695.817	1130.57	396.502	618.932	1066.36	257.654	701.067	813.065	30.0709	448.457	857.235	19.8851	453.461	857.027	88.4767	375.342	864.928	54.8809	286.002	846.966	73.9514	702.588	823.332	487.955	446.758	849.39	499.354	452.54	860.142	427.833	375.953	866.081	458.148	285.847	849.402	451.31
60	0.59	558.384	1268	251.851	611.845	1254.16	186.56	596.789	1257.19	320.865	702.589	1133.09	123.104	695.813	1130.57	396.496	618.905	1066.45	257.645	701.062	813.044	30.0671	448.442	857.252	19.9181	453.423	857.112	88.5093	375.333	864.932	54.8902	285.956	847.016	73.9715	702.609	823.339	487.985	446.739	849.366	499.336	452.601	860.108	427.834	375.969	866.086	458.148	285.855	849.417	451.328
61	0.6	558.388	1268.03	251.846	611.783	1254.19	186.566	596.778	1257.21	320.868	702.586	1133.04	123.073	695.809	1130.57	396.484	618.849	1066.51	257.643	701.028	812.978	30.0584	448.394	857.24	19.9338	453.339	857.196	88.5429	375.279	864.943	54.8876	285.931	847.074	74.0004	702.627	823.355	487.985	446.708	849.332	499.332	452.531	860.073	427.817	375.984	866.088	458.155	285.859	849.417	451.335
62	0.61	558.384	1268.06	251.874	611.746	1254.19	186.596	596.807	1257.23	320.912	702.567	1133	123.072	695.853	1130.55	396.485	618.859	1066.54	257.672	701.046	812.922	30.0661	448.375	857.232	19.9603	453.336	857.212	88.6081	375.267	864.945	54.9066	285.896	847.088	74.0476	702.646	823.354	487.99	446.712	849.295	499.352	452.579	860.031	427.872	376.032	866.088	458.185	285.877	849.42	451.386
63	0.62	558.396	1268.07	251.88	611.721	1254.22	186.584	596.799	1257.21	320.904	702.581	1132.98	123.049	695.824	1130.54	396.476	618.84	1066.56	257.686	701.053	812.88	30.0577	448.36	857.236	19.9997	453.339	857.173	88.6379	375.267	864.935	54.9139	285.879	847.08	74.0737	702.592	823.324	487.978	446.742	849.278	499.379	452.659	860.034	427.908	376.056	866.074	458.211	285.895	849.407	451.41
64	0.63	558.435	1268.08	251.825	611.738	1254.22	186.517	596.83	1257.21	320.825	702.567	1132.95	123.016	695.797	1130.54	396.448	618.856	1066.56	257.63	701.06	812.861	30.062	448.327	857.232	19.9856	453.362	857.117	88.5827	375.261	864.938	54.9115	285.861	847.058	74.0471	702.563	823.305	487.972	446.749	849.273	499.362	452.607	860.049	427.87	376.034	866.054	458.197	285.891	849.39	451.382
65	0.64	558.505	1268.06	251.745	611.804	1254.18	186.422	596.824	1257.22	320.743	702.557	1132.96	122.968	695.748	1130.51	396.388	618.872	1066.53	257.541	701.076	812.85	30.075	448.356	857.222	19.9373	453.425	857.025	88.5062	375.27	864.936	54.8933	285.905	847	73.9945	702.645	823.383	487.991	446.74	849.296	499.335	452.517	860.077	427.846	376.004	866.044	458.159	285.85	849.362	451.334
66	0.65	558.541	1268.06	251.718	611.853	1254.15	186.354	596.847	1257.22	320.711	702.571	1132.99	122.934	695.684	1130.52	396.371	618.912	1066.47	257.491	701.072	812.88	30.0665	448.415	857.19	19.9348	453.459	856.955	88.4801	375.288	864.928	54.9013	285.979	846.952	73.9686	702.647	823.418	487.97	446.736	849.329	499.329	452.511	860.136	427.869	375.977	866.045	458.142	285.814	849.354	451.311
67	0.66	558.567	1268.08	251.703	611.871	1254.14	186.318	596.867	1257.25	320.675	702.566	1133.02	122.921	695.65	1130.54	396.354	618.942	1066.46	257.454	701.04	812.902	30.0601	448.476	857.188	19.9297	453.416	856.944	88.4816	375.315	864.918	54.9048	285.976	846.928	73.9658	702.654	823.44	487.961	446.741	849.361	499.342	452.504	860.186	427.887	375.962	866.059	458.143	285.8	849.355	451.309
68	0.67	558.562	1268.12	251.654	611.848	1254.16	186.288	596.876	1257.28	320.613	702.525	1133.01	122.881	695.591	1130.56	396.313	618.87	1066.48	257.407	701.027	812.89	30.0496	448.498	857.182	19.884	453.44	856.941	88.459	375.301	864.91	54.8898	285.948	846.935	73.9403	702.637	823.434	487.993	446.729	849.362	499.338	452.41	860.203	427.843	375.934	866.07	458.127	285.779	849.369	451.301
69	0.68	558.533	1268.18	251.627	611.807	1254.18	186.275	596.874	1257.32	320.56	702.471	1132.99	122.837	695.521	1130.59	396.282	618.76	1066.52	257.391	701.007	812.842	30.062	448.452	857.198	19.8858	453.438	856.986	88.4395	375.242	864.924	54.8722	285.911	846.958	73.9368	702.602	823.437	487.983	446.712	849.358	499.321	452.407	860.18	427.813	375.933	866.073	458.129	285.755	849.387	451.293
70	0.69	558.527	1268.24	251.626	611.776	1254.23	186.289	596.827	1257.39	320.558	702.438	1132.98	122.84	695.51	1130.62	396.278	618.647	1066.61	257.428	700.958	812.787	30.0894	448.398	857.188	19.9482	453.393	857.052	88.4986	375.246	864.918	54.8882	285.901	846.994	73.9783	702.562	823.438	487.962	446.7	849.353	499.317	452.434	860.167	427.827	375.953	866.084	458.153	285.779	849.421	451.335
71	0.7	558.529	1268.31	251.619	611.791	1254.28	186.265	596.75	1257.45	320.566	702.415	1132.98	122.858	695.497	1130.65	396.295	618.586	1066.68	257.437	700.904	812.751	30.0814	448.402	857.176	19.9771	453.392	857.116	88.5368	375.283	864.913	54.9078	285.905	847.024	74.0089	702.536	823.425	487.977	446.698	849.345	499.337	452.442	860.137	427.842	375.991	866.105	458.174	285.816	849.453	451.373
72	0.71	558.558	1268.34	251.579	611.802	1254.31	186.226	596.699	1257.49	320.535	702.371	1132.98	122.85	695.474	1130.66	396.282	618.57	1066.72	257.43	700.944	812.753	30.0914	448.428	857.21	19.9762	453.378	857.141	88.5519	375.287	864.926	54.8986	285.902	847.042	74.0124	702.51	823.416	487.987	446.715	849.341	499.345	452.51	860.097	427.826	376.009	866.105	458.174	285.851	849.448	451.375
73	0.72	558.577	1268.33	251.523	611.795	1254.32	186.183	596.698	1257.5	320.487	702.337	1133	122.828	695.449	1130.67	396.256	618.546	1066.71	257.415	701	812.76	30.0989	448.434	857.239	19.9335	453.375	857.128	88.5229	375.28	864.934	54.8751	285.886	847.041	74.0089	702.549	823.44	487.974	446.729	849.352	499.329	452.508	860.076	427.794	376.003	866.092	458.155	285.836	849.411	451.354
74	0.73	558.608	1268.31	251.482	611.827	1254.28	186.115	596.729	1257.47	320.453	702.343	1133.02	122.823	695.464	1130.68	396.246	618.607	1066.67	257.384	701.026	812.77	30.1184	448.452	857.213	19.902	453.396	857.075	88.4955	375.316	864.92	54.8597	285.924	846.987	73.9591	702.592	823.468	487.983	446.765	849.362	499.335	452.544	860.081	427.811	375.99	866.072	458.15	285.824	849.38	451.338
75	0.74	558.629	1268.3	251.443	611.873	1254.25	186.044	596.734	1257.45	320.394	702.359	1133	122.813	695.437	1130.67	396.218	618.616	1066.65	257.352	701.045	812.798	30.1207	448.471	857.182	19.8869	453.431	857.021	88.4807	375.316	864.909	54.8684	285.949	846.955	73.9295	702.616	823.485	487.997	446.772	849.357	499.319	452.487	860.091	427.814	375.974	866.06	458.141	285.818	849.367	451.312
76	0.75	558.637	1268.27	251.411	611.852	1254.24	186.033	596.683	1257.45	320.377	702.322	1133.02	122.804	695.422	1130.67	396.199	618.577	1066.65	257.35	701.018	812.835	30.1048	448.437	857.165	19.903	453.415	857.003	88.4756	375.287	864.893	54.8725	285.94	846.939	73.9414	702.605	823.498	487.979	446.737	849.352	499.298	452.422	860.116	427.795	375.948	866.05	458.127	285.774	849.355	451.291
77	0.76	558.639	1268.24	251.42	611.856	1254.22	186.042	596.669	1257.44	320.385	702.315	1133.01	122.827	695.418	1130.67	396.193	618.545	1066.64	257.379	701.049	812.883	30.0955	448.402	857.174	19.9577	453.349	857.007	88.5044	375.284	864.895	54.8841	285.897	846.932	73.9798	702.576	823.511	487.97	446.708	849.359	499.311	452.424	860.133	427.801	375.918	866.05	458.137	285.74	849.364	451.313
78	0.77	558.645	1268.22	251.439	611.857	1254.22	186.047	596.705	1257.4	320.401	702.275	1133.01	122.859	695.43	1130.68	396.222	618.6	1066.62	257.409	701.026	812.9	30.1239	448.374	857.182	19.9983	453.365	857.014	88.5434	375.279	864.896	54.9032	285.856	846.924	74.0248	702.584	823.54	487.984	446.702	849.355	499.343	452.411	860.154	427.819	375.918	866.05	458.159	285.732	849.373	451.349
79	0.78	558.699	1268.2	251.408	611.88	1254.22	186.031	596.76	1257.39	320.381	702.259	1133	122.86	695.432	1130.69	396.207	618.645	1066.63	257.403	701.028	812.924	30.1583	448.359	857.188	20.0053	453.421	857.01	88.5574	375.284	864.897	54.9174	285.894	846.937	74.0234	702.603	823.568	487.985	446.703	849.354	499.338	452.361	860.157	427.83	375.944	866.059	458.163	285.723	849.378	451.35
80	0.79	558.693	1268.21	251.365	611.844	1254.25	186.011	596.697	1257.42	320.342	702.269	1133.01	122.837	695.41	1130.71	396.175	618.615	1066.65	257.375	701.028	812.933	30.1726	448.367	857.193	19.9888	453.395	857.014	88.5436	375.261	864.919	54.911	285.876	846.976	73.9961	702.588	823.567	487.955	446.702	849.368	499.311	452.331	860.165	427.801	375.938	866.062	458.148	285.719	849.391	451.329
81	0.8	558.63	1268.28	251.338	611.821	1254.28	185.996	596.587	1257.47	320.312	702.297	1133.04	122.814	695.412	1130.72	396.174	618.574	1066.71	257.354	701.017	812.879	30.2078	448.385	857.216	19.9638	453.378	857.051	88.5158	375.228	864.951	54.8886	285.853	847.006	73.9642	702.634	823.569	487.964	446.701	849.378	499.302	452.323	860.185	427.783	375.934	866.07	458.141	285.748	849.4	451.324
82	0.81	558.624	1268.32	251.337	611.852	1254.29	185.973	596.545	1257.52	320.315	702.375	1133.04	122.809	695.441	1130.74	396.189	618.543	1066.79	257.347	701.04	812.806	30.2325	448.382	857.27	19.9568	453.358	857.122	88.5312	375.232	864.984	54.8757	285.876	847.05	73.9539	702.615	823.537	487.987	446.765	849.387	499.317	452.371	860.184	427.797	375.966	866.078	458.159	285.808	849.413	451.346
83	0.82	558.591	1268.34	251.341	611.85	1254.31	185.966	596.565	1257.52	320.311	702.383	1133.02	122.779	695.449	1130.74	396.199	618.496	1066.85	257.342	701.05	812.744	30.2585	448.399	857.265	19.936	453.357	857.176	88.527	375.251	865.003	54.8612	285.872	847.104	73.9515	702.618	823.515	487.974	446.821	849.387	499.323	452.506	860.141	427.799	375.986	866.082	458.157	285.868	849.41	451.356
84	0.83	558.58	1268.33	251.334	611.858	1254.3	185.952	596.546	1257.5	320.3	702.378	1132.99	122.754	695.407	1130.71	396.198	618.473	1066.86	257.335	701.026	812.691	30.282	448.385	857.262	19.9208	453.319	857.183	88.5273	375.245	865.002	54.8384	285.879	847.1	73.9352	702.568	823.47	487.945	446.817	849.371	499.316	452.531	860.115	427.793	376.009	866.078	458.147	285.891	849.391	451.355
85	0.84	558.597	1268.31	251.345	611.872	1254.29	185.961	596.519	1257.49	320.319	702.363	1132.96	122.753	695.406	1130.72	396.217	618.453	1066.83	257.356	701.041	812.672	30.3007	448.353	857.243	19.9219	453.333	857.147	88.5245	375.26	864.969	54.8411	285.858	847.076	73.9464	702.524	823.464	487.94	446.776	849.345	499.317	452.507	860.079	427.812	375.993	866.067	458.15	285.878	849.387	451.362
86	0.85	558.595	1268.29	251.387	611.849	1254.29	186.024	596.555	1257.47	320.37	702.328	1132.96	122.797	695.398	1130.71	396.245	618.432	1066.79	257.411	701.034	812.662	30.3081	448.367	857.189	19.9755	453.344	857.113	88.5485	375.269	864.94	54.8757	285.834	847.031	73.9956	702.57	823.499	487.969	446.745	849.33	499.345	452.53	860.068	427.841	375.978	866.057	458.171	285.833	849.388	451.389
87	0.86	558.595	1268.25	251.43	611.837	1254.24	186.086	596.606	1257.39	320.43	702.264	1132.93	122.849	695.373	1130.69	396.252	618.419	1066.7	257.46	701.038	812.693	30.2662	448.394	857.159	20.0047	453.327	857.056	88.5708	375.295	864.901	54.886	285.857	846.987	74.0075	702.561	823.516	487.948	446.714	849.319	499.37	452.49	860.093	427.872	375.983	866.05	458.183	285.801	849.381	451.405
88	0.87	558.608	1268.21	251.444	611.803	1254.2	186.111	596.641	1257.32	320.438	702.183	1132.92	122.871	695.379	1130.67	396.252	618.478	1066.6	257.46	701.02	812.72	30.2798	448.431	857.136	19.9928	453.367	856.986	88.5547	375.275	864.885	54.8869	285.889	846.923	73.9814	702.514	823.485	487.937	446.672	849.326	499.378	452.436	860.099	427.872	375.949	866.051	458.181	285.777	849.359	451.388
89	0.88	558.603	1268.18	251.45	611.818	1254.18	186.116	596.726	1257.27	320.442	702.124	1132.95	122.898	695.346	1130.66	396.246	618.537	1066.52	257.45	701.007	812.755	30.2968	448.438	857.133	19.9667	453.415	856.926	88.5212	375.278	864.878	54.8914	285.906	846.889	73.9569	702.507	823.482	487.95	446.652	849.346	499.37	452.419	860.152	427.871	375.927	866.05	458.173	285.76	849.359	451.357
90	0.89	558.564	1268.2	251.482	611.778	1254.17	186.143	596.691	1257.29	320.45	702.13	1132.98	122.934	695.33	1130.67	396.245	618.454	1066.5	257.454	701.036	812.807	30.3001	448.464	857.141	19.969	453.422	856.945	88.5288	375.311	864.882	54.8925	285.927	846.886	73.955	702.572	823.504	487.954	446.664	849.374	499.362	452.375	860.2	427.852	375.896	866.053	458.166	285.728	849.387	451.349
91	0.9	558.5	1268.25	251.511	611.749	1254.2	186.174	596.676	1257.35	320.456	702.084	1132.99	122.919	695.321	1130.67	396.258	618.339	1066.55	257.461	700.991	812.775	30.3008	448.442	857.202	19.9597	453.403	857.011	88.5383	375.286	864.915	54.881	285.913	846.931	73.9524	702.562	823.484	487.957	446.694	849.385	499.36	452.375	860.219	427.863	375.9	866.068	458.163	285.718	849.41	451.366
92	0.91	558.445	1268.28	251.517	611.764	1254.24	186.163	596.641	1257.4	320.475	702.059	1133	122.915	695.29	1130.66	396.261	618.276	1066.61	257.455	700.952	812.726	30.2906	448.368	857.252	19.9703	453.395	857.052	88.5143	375.281	864.936	54.865	285.899	847.008	73.9385	702.547	823.47	487.939	446.718	849.379	499.339	452.401	860.204	427.851	375.92	866.085	458.163	285.763	849.409	451.358
93	0.92	558.414	1268.28	251.529	611.734	1254.26	186.198	596.565	1257.4	320.507	702.062	1133	122.915	695.293	1130.65	396.27	618.263	1066.61	257.446	701.008	812.677	30.3224	448.365	857.262	19.948	453.405	857.098	88.5098	375.279	864.948	54.8516	285.89	847.037	73.9266	702.541	823.445	487.932	446.715	849.357	499.329	452.43	860.133	427.831	375.964	866.084	458.151	285.821	849.405	451.353
94	0.93	558.354	1268.32	251.598	611.647	1254.29	186.279	596.527	1257.4	320.578	702.101	1133	122.937	695.332	1130.63	396.299	618.231	1066.63	257.496	701.039	812.631	30.3534	448.42	857.27	19.9432	453.366	857.142	88.5612	375.284	864.963	54.8655	285.895	847.047	73.9524	702.568	823.401	487.948	446.746	849.318	499.342	452.519	860.092	427.842	376.005	866.081	458.178	285.852	849.406	451.384
95	0.94	558.276	1268.33	251.694	611.515	1254.33	186.382	596.561	1257.38	320.666	702.069	1132.98	122.966	695.354	1130.62	396.341	618.23	1066.6	257.567	701.045	812.605	30.3533	448.406	857.265	19.9749	453.318	857.179	88.6264	375.283	864.955	54.893	285.871	847.06	74.0164	702.595	823.369	487.949	446.78	849.281	499.365	452.55	860.057	427.864	376.037	866.076	458.214	285.885	849.399	451.427
96	0.95	558.212	1268.31	251.755	611.454	1254.33	186.451	596.536	1257.33	320.726	702.024	1132.94	122.981	695.341	1130.6	396.348	618.227	1066.57	257.594	701.061	812.588	30.3336	448.389	857.224	19.99	453.336	857.171	88.6212	375.289	864.936	54.8936	285.854	847.055	74.048	702.605	823.354	487.928	446.778	849.267	499.372	452.562	860.042	427.895	376.038	866.067	458.229	285.86	849.39	451.434
97	0.96	558.177	1268.27	251.784	611.448	1254.3	186.472	596.509	1257.27	320.771	702.021	1132.94	122.975	695.293	1130.58	396.335	618.223	1066.53	257.57	701.066	812.599	30.3184	448.389	857.207	19.9956	453.357	857.113	88.5768	375.285	864.935	54.8831	285.864	847.038	74.0281	702.607	823.358	487.931	446.756	849.269	499.366	452.546	860.044	427.909	376.008	866.048	458.217	285.837	849.373	451.42
98	0.97	558.167	1268.22	251.803	611.496	1254.27	186.486	596.521	1257.24	320.815	701.98	1132.95	122.985	695.268	1130.55	396.347	618.296	1066.44	257.561	701.008	812.614	30.3447	448.412	857.184	19.9821	453.407	857.039	88.5283	375.309	864.921	54.8804	285.863	847.006	73.9822	702.601	823.388	487.93	446.746	849.287	499.366	452.524	860.079	427.897	375.985	866.034	458.201	285.804	849.35	451.397
99	0.98	558.178	1268.17	251.826	611.44	1254.26	186.527	596.531	1257.19	320.865	701.939	1132.97	123.003	695.248	1130.54	396.335	618.349	1066.34	257.554	700.979	812.64	30.3433	448.44	857.161	19.9591	453.418	856.978	88.514	375.327	864.893	54.8695	285.869	846.96	73.9385	702.649	823.451	487.93	446.726	849.319	499.382	452.502	860.126	427.901	375.956	866.038	458.19	285.762	849.346	451.374
100	0.99	558.131	1268.12	251.851	611.405	1254.25	186.525	596.55	1257.14	320.897	701.897	1132.96	122.997	695.248	1130.53	396.322	618.338	1066.27	257.55	701.003	812.699	30.3323	448.516	857.141	19.9118	453.455	856.948	88.5012	375.309	864.894	54.8634	285.884	846.916	73.9183	702.618	823.456	487.918	446.674	849.347	499.384	452.426	860.161	427.894	375.921	866.056	458.18	285.73	849.359	451.355
101	1	558.088	1268.11	251.901	611.347	1254.26	186.58	596.522	1257.11	320.94	701.864	1132.95	123.012	695.247	1130.55	396.318	618.276	1066.25	257.57	700.971	812.7	30.3443	448.502	857.142	19.9188	453.414	856.965	88.5153	375.294	864.902	54.8669	285.869	846.939	73.9228	702.574	823.44	487.922	446.646	849.352	499.378	452.394	860.164	427.867	375.907	866.062	458.171	285.71	849.367	451.349
102	1.01	558.015	1268.13	251.973	611.266	1254.29	186.675	596.453	1257.11	321.019	701.839	1132.94	123.021	695.249	1130.56	396.333	618.24	1066.24	257.612	700.983	812.692	30.3464	448.424	857.163	19.9662	453.354	857.018	88.5628	375.285	864.908	54.8989	285.857	846.956	73.9594	702.568	823.414	487.921	446.649	849.336	499.382	452.42	860.178	427.901	375.922	866.069	458.184	285.712	849.39	451.374
103	1.02	557.925	1268.16	252.05	611.146	1254.32	186.763	596.388	1257.12	321.101	701.791	1132.92	123.017	695.221	1130.54	396.351	618.217	1066.28	257.637	700.981	812.66	30.3522	448.375	857.2	20.0153	453.339	857.08	88.6316	375.305	864.906	54.8947	285.85	846.981	73.9938	702.587	823.398	487.92	446.689	849.312	499.409	452.479	860.15	427.931	375.963	866.075	458.209	285.769	849.405	451.415
104	1.03	557.8	1268.19	252.116	611.005	1254.35	186.828	596.323	1257.12	321.147	701.787	1132.91	123.001	695.207	1130.53	396.369	618.189	1066.32	257.647	700.961	812.578	30.3678	448.36	857.208	20.0246	453.347	857.109	88.6413	375.296	864.905	54.902	285.87	847.009	73.9936	702.568	823.335	487.911	446.712	849.293	499.419	452.505	860.096	427.934	376.003	866.078	458.231	285.81	849.41	451.439
105	1.04	557.68	1268.2	252.171	610.895	1254.38	186.876	596.265	1257.11	321.189	701.787	1132.91	123.011	695.212	1130.53	396.361	618.089	1066.34	257.642	701.005	812.524	30.3519	448.368	857.2	20.0094	453.373	857.131	88.5881	375.27	864.929	54.8836	285.865	847.024	73.9772	702.599	823.312	487.896	446.742	849.28	499.418	452.541	860.071	427.922	376.016	866.086	458.227	285.834	849.401	451.437
106	1.05	557.63	1268.19	252.195	610.816	1254.4	186.92	596.206	1257.11	321.23	701.788	1132.92	123.011	695.214	1130.53	396.337	617.946	1066.31	257.635	701.061	812.544	30.3436	448.359	857.224	19.985	453.356	857.148	88.5458	375.293	864.953	54.8459	285.87	847.036	73.9492	702.639	823.317	487.898	446.773	849.287	499.4	452.587	860.031	427.898	376.013	866.079	458.219	285.858	849.389	451.428
107	1.06	557.559	1268.19	252.237	610.737	1254.4	186.976	596.151	1257.08	321.277	701.773	1132.94	122.994	695.196	1130.52	396.317	617.866	1066.21	257.652	701.072	812.538	30.352	448.382	857.236	19.9539	453.372	857.135	88.5342	375.291	864.959	54.8341	285.878	847.047	73.9446	702.701	823.324	487.892	446.77	849.3	499.386	452.6	860.028	427.864	376.012	866.076	458.207	285.864	849.387	451.414
108	1.07	557.502	1268.16	252.286	610.721	1254.38	186.993	596.13	1257.03	321.312	701.754	1132.95	122.994	695.16	1130.5	396.302	617.819	1066.12	257.675	701.083	812.543	30.3387	448.415	857.249	19.954	453.383	857.121	88.519	375.282	864.958	54.826	285.869	847.048	73.9347	702.683	823.318	487.886	446.778	849.302	499.383	452.499	860.077	427.86	375.999	866.074	458.188	285.836	849.386	451.4
109	1.08	557.477	1268.11	252.347	610.653	1254.37	187.038	596.08	1256.98	321.369	701.735	1132.94	123.014	695.117	1130.48	396.305	617.738	1066.04	257.686	701.07	812.605	30.3306	448.42	857.213	19.9334	453.399	857.074	88.4921	375.268	864.945	54.8325	285.845	847.024	73.9202	702.622	823.324	487.885	446.724	849.305	499.393	452.406	860.116	427.881	375.977	866.065	458.189	285.798	849.381	451.393
110	1.09	557.478	1268.03	252.402	610.597	1254.33	187.081	596.066	1256.89	321.442	701.639	1132.92	123.029	695.078	1130.45	396.311	617.746	1065.93	257.693	701.035	812.63	30.3213	448.425	857.167	19.9153	453.411	856.993	88.5114	375.286	864.919	54.8378	285.852	846.961	73.921	702.625	823.328	487.909	446.697	849.298	499.404	452.399	860.152	427.897	375.97	866.056	458.194	285.747	849.364	451.385
111	1.1	557.48	1267.96	252.465	610.561	1254.29	187.129	596.101	1256.79	321.513	701.561	1132.9	123.054	695.025	1130.41	396.334	617.791	1065.81	257.708	701.029	812.65	30.2911	448.47	857.12	19.9391	453.44	856.924	88.5301	375.312	864.901	54.8568	285.902	846.9	73.9416	702.622	823.321	487.897	446.65	849.283	499.414	452.383	860.175	427.933	375.954	866.038	458.206	285.728	849.362	451.381
112	1.11	557.41	1267.93	252.511	610.481	1254.29	187.184	596.03	1256.77	321.56	701.516	1132.89	123.051	695.032	1130.41	396.353	617.785	1065.74	257.732	700.974	812.649	30.273	448.488	857.099	19.9488	453.433	856.921	88.5198	375.298	864.894	54.8687	285.92	846.878	73.9465	702.621	823.345	487.879	446.645	849.266	499.416	452.389	860.156	427.929	375.937	866.031	458.207	285.715	849.36	451.387
113	1.12	557.328	1267.93	252.552	610.423	1254.3	187.193	595.864	1256.79	321.592	701.504	1132.91	123.039	695.032	1130.41	396.341	617.714	1065.75	257.732	700.985	812.629	30.2705	448.444	857.105	19.9674	453.425	856.944	88.5098	375.279	864.898	54.8529	285.893	846.895	73.9431	702.618	823.328	487.891	446.658	849.271	499.411	452.419	860.147	427.922	375.921	866.048	458.208	285.728	849.367	451.392
114	1.13	557.256	1267.95	252.586	610.377	1254.33	187.211	595.751	1256.8	321.619	701.539	1132.93	123.038	695.035	1130.43	396.348	617.582	1065.82	257.738	701.033	812.605	30.2685	448.438	857.149	19.9733	453.397	856.999	88.5323	375.278	864.924	54.8407	285.883	846.963	73.9402	702.673	823.318	487.871	446.699	849.278	499.413	452.422	860.139	427.923	375.966	866.064	458.215	285.772	849.383	451.405
115	1.14	557.159	1267.99	252.643	610.359	1254.36	187.224	595.561	1256.86	321.691	701.562	1132.94	123.049	695.05	1130.46	396.357	617.501	1065.89	257.765	701.05	812.601	30.2863	448.477	857.199	19.9741	453.374	857.093	88.5714	375.297	864.945	54.8499	285.898	847.036	73.9522	702.726	823.315	487.866	446.761	849.28	499.413	452.422	860.109	427.918	376.001	866.079	458.222	285.845	849.4	451.438
116	1.15	557.054	1268.01	252.672	610.266	1254.38	187.246	595.328	1256.92	321.762	701.581	1132.93	123.053	695.05	1130.48	396.375	617.443	1065.95	257.776	701.062	812.596	30.2864	448.441	857.231	19.9616	453.352	857.17	88.5888	375.312	864.961	54.8455	285.899	847.088	73.9514	702.69	823.265	487.87	446.798	849.286	499.403	452.482	860.079	427.896	376.013	866.087	458.219	285.886	849.419	451.458
117	1.16	556.967	1267.99	252.681	610.222	1254.36	187.247	595.249	1256.92	321.737	701.574	1132.93	123.048	695.048	1130.48	396.382	617.417	1065.94	257.769	701.043	812.551	30.2861	448.427	857.216	19.91	453.356	857.185	88.5692	375.298	864.961	54.8214	285.862	847.114	73.9372	702.651	823.207	487.872	446.791	849.288	499.395	452.6	860.018	427.894	376.025	866.081	458.213	285.897	849.421	451.449
118	1.17	556.93	1267.94	252.703	610.24	1254.33	187.25	595.246	1256.86	321.711	701.563	1132.91	123.038	695.062	1130.46	396.368	617.48	1065.86	257.772	701.04	812.549	30.2775	448.392	857.19	19.8949	453.355	857.164	88.5289	375.298	864.952	54.7977	285.844	847.081	73.9198	702.627	823.204	487.868	446.774	849.287	499.379	452.632	860.001	427.894	376.017	866.084	458.207	285.901	849.402	451.433
119	1.18	556.975	1267.84	252.741	610.257	1254.27	187.267	595.246	1256.82	321.767	701.608	1132.9	123.069	695.054	1130.45	396.391	617.551	1065.76	257.811	701.04	812.586	30.2622	448.403	857.151	19.9243	453.397	857.086	88.512	375.328	864.903	54.808	285.865	847	73.9107	702.631	823.233	487.853	446.749	849.296	499.396	452.582	860.021	427.888	376.017	866.062	458.2	285.858	849.384	451.417
120	1.19	557.05	1267.71	252.777	610.222	1254.22	187.279	595.184	1256.78	321.796	701.609	1132.91	123.095	695.038	1130.44	396.41	617.617	1065.66	257.827	701.025	812.637	30.262	448.435	857.119	19.9349	453.419	856.99	88.4922	375.36	864.873	54.8192	285.888	846.927	73.915	702.669	823.246	487.851	446.721	849.311	499.408	452.522	860.064	427.906	375.974	866.045	458.208	285.807	849.374	451.405
121	1.2	557.058	1267.63	252.773	610.169	1254.2	187.288	595.173	1256.71	321.802	701.571	1132.92	123.101	695.021	1130.41	396.384	617.682	1065.57	257.8	701.037	812.662	30.2502	448.479	857.122	19.898	453.438	856.907	88.4631	375.31	864.881	54.8019	285.904	846.896	73.8985	702.654	823.258	487.856	446.682	849.32	499.404	452.45	860.119	427.892	375.951	866.046	458.199	285.771	849.363	451.379
122	1.21	557.05	1267.6	252.772	610.164	1254.18	187.287	595.182	1256.68	321.802	701.601	1132.92	123.089	695.032	1130.37	396.369	617.716	1065.52	257.794	701.069	812.679	30.2379	448.509	857.119	19.8693	453.41	856.901	88.4574	375.308	864.894	54.7986	285.898	846.9	73.864	702.632	823.264	487.84	446.671	849.314	499.388	452.377	860.164	427.885	375.953	866.053	458.191	285.741	849.369	451.358
123	1.22	557.016	1267.6	252.814	610.177	1254.18	187.319	595.143	1256.69	321.838	701.622	1132.9	123.086	695.045	1130.35	396.399	617.727	1065.52	257.826	701.035	812.646	30.251	448.501	857.132	19.912	453.393	856.943	88.4822	375.31	864.918	54.8317	285.91	846.927	73.8943	702.656	823.277	487.837	446.697	849.311	499.401	452.414	860.163	427.888	375.967	866.069	458.197	285.756	849.39	451.379
124	1.23	556.936	1267.63	252.867	610.154	1254.2	187.34	595.096	1256.7	321.889	701.605	1132.87	123.098	695.101	1130.36	396.425	617.72	1065.55	257.851	700.99	812.528	30.271	448.472	857.16	19.9427	453.394	856.996	88.5232	375.303	864.949	54.8512	285.916	846.982	73.9366	702.701	823.265	487.851	446.73	849.299	499.408	452.508	860.125	427.891	375.978	866.075	458.209	285.807	849.41	451.412
125	1.24	556.865	1267.66	252.893	610.113	1254.22	187.355	595.071	1256.68	321.914	701.601	1132.85	123.092	695.141	1130.36	396.421	617.649	1065.59	257.863	701.003	812.456	30.2921	448.442	857.177	19.9646	453.399	857.047	88.5586	375.294	864.962	54.8623	285.876	847.034	73.9674	702.675	823.221	487.859	446.729	849.279	499.411	452.52	860.073	427.901	375.999	866.085	458.224	285.844	849.411	451.436
126	1.25	556.863	1267.66	252.938	610.081	1254.24	187.386	595.028	1256.67	321.916	701.615	1132.84	123.08	695.173	1130.34	396.428	617.634	1065.59	257.872	701.041	812.412	30.2946	448.398	857.194	20.02	453.349	857.089	88.587	375.283	864.965	54.8646	285.876	847.065	73.9878	702.651	823.165	487.858	446.739	849.255	499.422	452.546	860.039	427.947	376.037	866.086	458.236	285.867	849.405	451.441
127	1.26	556.858	1267.65	252.976	610.082	1254.24	187.41	595.008	1256.66	321.956	701.634	1132.82	123.097	695.175	1130.32	396.465	617.71	1065.57	257.899	701.075	812.407	30.3344	448.411	857.193	20.0315	453.341	857.114	88.6166	375.305	864.963	54.8837	285.9	847.067	73.9973	702.719	823.166	487.86	446.763	849.236	499.433	452.657	860.001	427.976	376.065	866.076	458.251	285.912	849.394	451.463
128	1.27	556.838	1267.66	252.985	610.117	1254.24	187.408	594.994	1256.69	321.97	701.616	1132.81	123.112	695.19	1130.33	396.478	617.722	1065.56	257.902	701.078	812.388	30.3886	448.442	857.212	20.0149	453.354	857.106	88.6307	375.313	864.971	54.8766	285.887	847.067	73.9941	702.73	823.153	487.851	446.764	849.239	499.425	452.599	859.993	427.94	376.054	866.065	458.25	285.909	849.378	451.463
129	1.28	556.816	1267.66	252.96	610.115	1254.23	187.396	594.998	1256.72	321.936	701.602	1132.82	123.101	695.154	1130.31	396.469	617.748	1065.53	257.86	701.046	812.37	30.366	448.437	857.214	19.9795	453.312	857.082	88.5792	375.306	864.982	54.8488	285.851	847.039	73.9504	702.703	823.146	487.841	446.749	849.265	499.408	452.595	860.026	427.905	376.009	866.057	458.225	285.884	849.378	451.426
130	1.29	556.865	1267.62	252.913	610.155	1254.23	187.371	595.035	1256.73	321.923	701.608	1132.83	123.075	695.143	1130.31	396.449	617.829	1065.5	257.825	701.051	812.369	30.3672	448.442	857.215	19.948	453.355	857.026	88.5192	375.314	864.978	54.8172	285.875	847.013	73.8976	702.754	823.17	487.857	446.743	849.312	499.392	452.542	860.072	427.866	375.979	866.058	458.195	285.849	849.371	451.381
131	1.3	556.895	1267.6	252.913	610.188	1254.21	187.358	595.114	1256.71	321.937	701.608	1132.84	123.063	695.156	1130.3	396.443	617.932	1065.46	257.816	701.059	812.401	30.3915	448.456	857.179	19.9397	453.428	856.975	88.4843	375.346	864.959	54.8062	285.927	846.967	73.8844	702.735	823.171	487.848	446.738	849.328	499.406	452.477	860.156	427.88	375.964	866.069	458.181	285.838	849.376	451.359
132	1.31	556.904	1267.61	252.939	610.185	1254.22	187.388	595.104	1256.73	321.958	701.574	1132.84	123.088	695.163	1130.29	396.44	617.942	1065.45	257.823	701.001	812.426	30.3826	448.495	857.159	19.933	453.43	856.951	88.4919	375.373	864.956	54.8164	285.948	846.946	73.8794	702.68	823.154	487.865	446.725	849.346	499.422	452.428	860.22	427.886	375.952	866.087	458.182	285.812	849.398	451.363
133	1.32	556.899	1267.61	252.97	610.147	1254.2	187.415	595.025	1256.72	321.984	701.579	1132.84	123.111	695.142	1130.27	396.451	617.951	1065.43	257.843	700.984	812.409	30.3942	448.457	857.158	19.9797	453.381	856.957	88.5453	375.359	864.928	54.8376	285.933	846.953	73.8897	702.641	823.132	487.845	446.689	849.341	499.423	452.388	860.204	427.87	375.948	866.092	458.194	285.774	849.415	451.375
134	1.33	556.934	1267.62	252.994	610.166	1254.18	187.442	595.066	1256.69	322.007	701.597	1132.81	123.118	695.154	1130.24	396.446	617.961	1065.41	257.861	700.964	812.392	30.3913	448.457	857.141	19.9937	453.351	856.955	88.6024	375.36	864.897	54.8461	285.953	846.95	73.914	702.689	823.138	487.835	446.656	849.31	499.409	452.359	860.17	427.883	375.948	866.08	458.197	285.754	849.411	451.39
135	1.34	556.979	1267.62	253.045	610.221	1254.18	187.474	595.144	1256.65	322.033	701.601	1132.79	123.132	695.207	1130.24	396.474	618.04	1065.4	257.898	701.02	812.374	30.4259	448.471	857.121	20.0285	453.372	856.987	88.6354	375.373	864.88	54.8858	285.945	846.956	73.9675	702.698	823.134	487.867	446.674	849.285	499.424	452.434	860.129	427.925	375.98	866.074	458.218	285.807	849.408	451.426
136	1.35	556.987	1267.65	253.081	610.248	1254.2	187.499	595.182	1256.66	322.057	701.599	1132.76	123.142	695.208	1130.2	396.503	618.076	1065.39	257.922	701.044	812.348	30.4447	448.442	857.124	20.081	453.372	857.008	88.6759	375.343	864.896	54.9055	285.94	846.968	74.0085	702.7	823.109	487.875	446.695	849.259	499.433	452.546	860.055	427.952	376.013	866.063	458.244	285.835	849.406	451.456
137	1.36	556.98	1267.69	253.072	610.221	1254.23	187.492	595.219	1256.7	322.031	701.614	1132.73	123.13	695.207	1130.17	396.523	618.028	1065.38	257.899	701.039	812.239	30.4554	448.449	857.15	20.0774	453.36	857.008	88.6783	375.318	864.913	54.9157	285.948	846.973	74.0002	702.721	823.07	487.854	446.734	849.252	499.438	452.62	859.991	427.943	376.02	866.062	458.251	285.843	849.394	451.459
138	1.37	556.993	1267.73	253.006	610.239	1254.27	187.451	595.26	1256.76	321.965	701.644	1132.74	123.1	695.239	1130.15	396.514	618.058	1065.37	257.838	701.054	812.142	30.4552	448.447	857.165	20.0143	453.333	857.01	88.6287	375.333	864.932	54.8748	285.927	846.995	73.9684	702.704	823.031	487.859	446.775	849.248	499.422	452.609	860.007	427.935	376.011	866.048	458.23	285.884	849.37	451.435
139	1.38	557.024	1267.76	252.94	610.244	1254.3	187.411	595.283	1256.79	321.928	701.677	1132.73	123.039	695.283	1130.12	396.487	618.086	1065.37	257.786	701.07	812.072	30.4571	448.44	857.198	19.9764	453.365	857.013	88.5459	375.33	864.962	54.8233	285.961	847.011	73.9104	702.694	822.981	487.874	446.793	849.267	499.41	452.596	860.036	427.919	376.009	866.051	458.211	285.928	849.365	451.418
140	1.39	556.994	1267.8	252.898	610.273	1254.34	187.386	595.296	1256.84	321.916	701.69	1132.73	122.989	695.33	1130.11	396.495	618.078	1065.4	257.775	701.014	812.016	30.421	448.488	857.204	19.9395	453.374	857.021	88.5197	375.331	864.973	54.7952	285.956	847.045	73.9012	702.704	822.989	487.868	446.77	849.292	499.4	452.616	860.049	427.871	376.004	866.074	458.196	285.923	849.382	451.402
141	1.4	556.982	1267.85	252.893	610.27	1254.38	187.388	595.367	1256.85	321.908	701.686	1132.71	122.957	695.329	1130.1	396.522	618.073	1065.42	257.795	700.976	811.976	30.4368	448.52	857.181	19.9033	453.367	857.043	88.5207	375.308	864.989	54.8086	285.919	847.065	73.9158	702.699	822.978	487.856	446.749	849.302	499.392	452.554	860.075	427.872	375.995	866.091	458.195	285.882	849.415	451.392
142	1.41	557.046	1267.85	252.907	610.288	1254.37	187.412	595.411	1256.85	321.912	701.686	1132.71	122.95	695.335	1130.08	396.54	618.036	1065.42	257.821	700.972	812.003	30.4392	448.485	857.225	19.9466	453.344	857.057	88.5512	375.301	864.98	54.8254	285.891	847.072	73.9357	702.715	822.985	487.843	446.732	849.31	499.395	452.48	860.113	427.887	375.991	866.1	458.203	285.839	849.438	451.394
143	1.42	557.115	1267.8	252.926	610.32	1254.34	187.447	595.498	1256.81	321.907	701.688	1132.71	122.95	695.355	1130.05	396.55	618.059	1065.36	257.852	700.991	812.053	30.4288	448.476	857.206	19.9765	453.325	857.022	88.575	375.285	864.968	54.8575	285.896	847.033	73.9507	702.786	823.038	487.824	446.707	849.302	499.4	452.434	860.134	427.881	375.976	866.088	458.197	285.803	849.426	451.387
144	1.43	557.206	1267.74	252.938	610.397	1254.3	187.453	595.619	1256.75	321.906	701.667	1132.66	122.968	695.38	1130.02	396.556	618.157	1065.27	257.884	700.995	812.064	30.4361	448.483	857.17	19.9779	453.326	856.977	88.5692	375.303	864.944	54.867	285.928	846.98	73.9527	702.813	823.042	487.815	446.697	849.291	499.402	452.452	860.127	427.899	375.978	866.063	458.196	285.791	849.404	451.385
145	1.44	557.275	1267.7	252.948	610.389	1254.29	187.454	595.798	1256.69	321.886	701.696	1132.67	122.989	695.408	1130	396.554	618.242	1065.2	257.901	700.986	812.055	30.4498	448.474	857.125	20.0016	453.335	856.937	88.5752	375.302	864.917	54.8705	285.906	846.959	73.9591	702.79	823.034	487.798	446.682	849.28	499.405	452.459	860.12	427.918	375.983	866.06	458.202	285.787	849.387	451.398
146	1.45	557.31	1267.7	252.934	610.421	1254.29	187.444	595.863	1256.68	321.877	701.705	1132.67	122.997	695.443	1129.98	396.545	618.333	1065.15	257.891	700.974	812.044	30.4536	448.452	857.132	20.02	453.376	856.909	88.5523	375.269	864.924	54.8952	285.881	846.957	73.9601	702.746	822.997	487.786	446.692	849.286	499.406	452.529	860.092	427.918	375.98	866.056	458.205	285.788	849.368	451.401
147	1.46	557.357	1267.72	252.93	610.472	1254.29	187.435	595.922	1256.71	321.899	701.743	1132.66	122.987	695.503	1129.96	396.539	618.371	1065.13	257.866	701.006	812.019	30.44	448.458	857.147	19.9882	453.385	856.902	88.5637	375.286	864.939	54.8807	285.919	846.959	73.9549	702.718	822.945	487.79	446.697	849.294	499.395	452.534	860.076	427.916	375.989	866.059	458.204	285.822	849.355	451.41
148	1.47	557.366	1267.78	252.933	610.537	1254.32	187.437	595.943	1256.76	321.9	701.819	1132.65	122.965	695.569	1129.95	396.544	618.414	1065.15	257.864	701.024	811.94	30.4355	448.478	857.173	19.9688	453.397	856.942	88.5578	375.321	864.951	54.8535	285.958	846.984	73.9573	702.701	822.886	487.802	446.719	849.292	499.401	452.582	860.04	427.916	376.02	866.067	458.216	285.883	849.361	451.434
149	1.48	557.338	1267.87	252.918	610.567	1254.37	187.454	595.92	1256.83	321.893	701.901	1132.6	122.933	695.573	1129.95	396.558	618.375	1065.21	257.865	701.027	811.896	30.4238	448.46	857.178	19.9571	453.368	857.02	88.551	375.32	864.958	54.8466	285.926	847.054	73.9568	702.731	822.872	487.784	446.741	849.287	499.399	452.544	860.035	427.928	376.027	866.077	458.212	285.896	849.39	451.438
150	1.49	557.302	1267.97	252.905	610.594	1254.43	187.447	595.842	1256.91	321.887	701.943	1132.54	122.897	695.591	1129.94	396.572	618.366	1065.28	257.859	701.041	811.839	30.3783	448.431	857.205	19.9359	453.32	857.1	88.5773	375.319	864.963	54.8426	285.906	847.098	73.9464	702.696	822.832	487.763	446.752	849.293	499.385	452.542	860.026	427.892	376.026	866.09	458.209	285.906	849.421	451.432
151	1.5	557.3	1268.02	252.908	610.606	1254.47	187.449	595.849	1256.93	321.878	701.977	1132.49	122.866	695.603	1129.91	396.594	618.377	1065.31	257.873	701.001	811.768	30.3324	448.417	857.217	19.9554	453.309	857.138	88.569	375.294	864.976	54.846	285.882	847.131	73.9687	702.702	822.787	487.769	446.755	849.289	499.39	452.538	860.03	427.843	376.037	866.105	458.208	285.919	849.439	451.438
152	1.51	557.353	1268.05	252.922	610.666	1254.49	187.469	595.845	1256.98	321.887	702.036	1132.45	122.839	695.655	1129.88	396.643	618.429	1065.31	257.897	701.006	811.69	30.2921	448.405	857.219	19.9681	453.333	857.108	88.5786	375.289	864.992	54.8491	285.91	847.112	73.9945	702.767	822.783	487.77	446.75	849.286	499.415	452.511	860.061	427.835	376.029	866.113	458.222	285.908	849.443	451.453
153	1.52	557.441	1268.04	252.915	610.705	1254.49	187.487	595.951	1256.98	321.879	702.12	1132.4	122.799	695.697	1129.85	396.669	618.467	1065.27	257.896	700.985	811.603	30.2809	448.433	857.193	19.9598	453.346	857.035	88.5637	375.315	864.983	54.8499	285.959	847.055	73.9725	702.755	822.773	487.765	446.755	849.302	499.419	452.524	860.089	427.865	376.006	866.099	458.213	285.873	849.44	451.451
154	1.53	557.579	1267.98	252.857	610.778	1254.48	187.465	596.248	1256.88	321.803	702.214	1132.37	122.742	695.728	1129.8	396.653	618.57	1065.17	257.855	700.962	811.548	30.2745	448.511	857.15	19.8988	453.416	856.91	88.4965	375.335	864.952	54.8152	285.994	846.982	73.93	702.745	822.749	487.753	446.735	849.312	499.4	452.516	860.122	427.876	375.965	866.088	458.184	285.841	849.415	451.398
155	1.54	557.739	1267.91	252.791	610.896	1254.45	187.424	596.42	1256.8	321.75	702.237	1132.35	122.731	695.767	1129.75	396.631	618.732	1065.04	257.81	700.993	811.518	30.2922	448.583	857.11	19.8536	453.522	856.794	88.412	375.375	864.928	54.7761	286.013	846.93	73.892	702.747	822.744	487.74	446.719	849.313	499.391	452.482	860.153	427.864	375.961	866.067	458.164	285.831	849.373	451.361
156	1.55	557.84	1267.89	252.792	611	1254.44	187.43	596.568	1256.79	321.726	702.266	1132.31	122.727	695.778	1129.71	396.647	618.851	1064.97	257.818	701.018	811.498	30.3125	448.612	857.091	19.8905	453.566	856.747	88.4105	375.421	864.909	54.7895	286.037	846.896	73.9038	702.765	822.731	487.73	446.724	849.299	499.407	452.443	860.144	427.878	375.977	866.053	458.18	285.806	849.353	451.364
157	1.56	557.895	1267.93	252.819	611.037	1254.46	187.485	596.599	1256.82	321.735	702.301	1132.25	122.731	695.795	1129.68	396.677	618.881	1064.97	257.859	701.057	811.455	30.3416	448.595	857.092	19.9226	453.513	856.795	88.4728	375.433	864.905	54.8492	286.021	846.901	73.9368	702.796	822.719	487.723	446.734	849.288	499.427	452.473	860.125	427.9	375.982	866.05	458.202	285.82	849.355	451.39
158	1.57	557.878	1268.01	252.843	611.033	1254.5	187.522	596.599	1256.85	321.738	702.309	1132.19	122.721	695.828	1129.66	396.702	618.844	1064.99	257.909	701.061	811.4	30.3841	448.496	857.111	19.9517	453.444	856.859	88.5548	375.383	864.924	54.8831	285.971	846.972	73.991	702.82	822.684	487.737	446.711	849.264	499.414	452.501	860.105	427.928	375.998	866.068	458.224	285.838	849.374	451.421
159	1.58	557.854	1268.1	252.867	611.051	1254.55	187.52	596.648	1256.94	321.751	702.308	1132.14	122.714	695.852	1129.65	396.714	618.793	1065.02	257.958	701.05	811.338	30.4059	448.435	857.125	19.9958	453.377	856.956	88.6044	375.362	864.95	54.8938	285.929	847.062	74.0486	702.813	822.649	487.749	446.69	849.246	499.419	452.529	860.047	427.951	376.04	866.087	458.24	285.866	849.413	451.459
160	1.59	557.848	1268.21	252.883	611.108	1254.6	187.522	596.615	1257.07	321.781	702.305	1132.06	122.685	695.903	1129.64	396.75	618.771	1065.07	258.006	701.067	811.246	30.4217	448.454	857.149	20.0045	453.368	857.028	88.6463	375.344	864.965	54.9115	285.931	847.136	74.0796	702.796	822.605	487.758	446.702	849.236	499.438	452.608	860.014	427.969	376.072	866.099	458.263	285.888	849.447	451.495
161	1.6	557.838	1268.3	252.87	611.192	1254.65	187.482	596.602	1257.19	321.752	702.37	1132.02	122.621	695.95	1129.64	396.778	618.746	1065.12	257.993	701.08	811.176	30.4165	448.451	857.179	19.9972	453.381	857.077	88.6396	375.333	864.982	54.8985	285.973	847.152	74.0677	702.845	822.599	487.758	446.722	849.246	499.433	452.587	860.012	427.975	376.055	866.11	458.263	285.915	849.467	451.5
162	1.61	557.869	1268.37	252.799	611.201	1254.68	187.438	596.683	1257.25	321.684	702.396	1131.96	122.537	695.971	1129.64	396.778	618.684	1065.15	257.936	701.119	811.129	30.388	448.452	857.207	19.9595	453.379	857.064	88.5766	375.317	865.002	54.8565	285.966	847.148	74.0132	702.847	822.58	487.728	446.736	849.267	499.417	452.552	860.046	427.939	376.025	866.123	458.241	285.913	849.463	451.462
163	1.62	557.926	1268.41	252.709	611.229	1254.7	187.411	596.749	1257.27	321.631	702.404	1131.94	122.471	695.962	1129.61	396.766	618.707	1065.12	257.872	701.08	811.063	30.3795	448.476	857.228	19.9204	453.386	856.99	88.528	375.323	865.014	54.8117	285.959	847.117	73.9595	702.809	822.544	487.709	446.709	849.291	499.413	452.511	860.115	427.902	375.998	866.118	458.21	285.897	849.456	451.419
164	1.63	558.054	1268.37	252.649	611.321	1254.69	187.361	596.871	1257.24	321.573	702.438	1131.9	122.406	695.965	1129.56	396.764	618.797	1065.04	257.839	701.059	810.985	30.3548	448.507	857.21	19.895	453.441	856.863	88.4749	375.363	865.005	54.8048	286.01	847.048	73.9063	702.794	822.491	487.701	446.722	849.316	499.41	452.497	860.149	427.904	375.989	866.101	458.189	285.899	849.437	451.389
165	1.64	558.219	1268.33	252.61	611.422	1254.69	187.305	597.001	1257.2	321.516	702.491	1131.81	122.333	696	1129.52	396.76	618.899	1064.94	257.821	701.071	810.93	30.3178	448.557	857.149	19.86	453.44	856.777	88.46	375.397	864.969	54.822	286.054	846.998	73.8904	702.816	822.472	487.683	446.743	849.326	499.389	452.476	860.159	427.89	375.992	866.094	458.172	285.879	849.422	451.354
166	1.65	558.323	1268.3	252.619	611.477	1254.67	187.271	597.035	1257.19	321.511	702.543	1131.71	122.275	696.007	1129.48	396.755	618.987	1064.86	257.827	700.974	810.847	30.3081	448.568	857.109	19.8807	453.449	856.732	88.4728	375.395	864.944	54.8387	286.043	846.972	73.9183	702.798	822.46	487.654	446.73	849.315	499.371	452.444	860.164	427.901	375.979	866.081	458.181	285.843	849.398	451.347
167	1.66	558.371	1268.28	252.662	611.516	1254.65	187.296	597.074	1257.18	321.551	702.573	1131.62	122.257	696.005	1129.45	396.763	619.046	1064.81	257.872	700.968	810.776	30.3137	448.568	857.101	19.9404	453.435	856.705	88.5278	375.389	864.931	54.9001	286.043	846.96	73.9643	702.796	822.453	487.631	446.715	849.298	499.398	452.485	860.134	427.929	375.975	866.074	458.204	285.826	849.384	451.382
168	1.67	558.468	1268.26	252.692	611.591	1254.62	187.289	597.153	1257.18	321.575	702.638	1131.5	122.212	696.045	1129.41	396.785	619.099	1064.78	257.906	701.008	810.704	30.3275	448.541	857.1	19.9955	453.436	856.706	88.5766	375.389	864.928	54.9427	286.042	846.969	74.0132	702.798	822.411	487.615	446.691	849.27	499.425	452.524	860.108	427.972	375.991	866.062	458.228	285.836	849.391	451.428
169	1.68	558.556	1268.27	252.676	611.653	1254.63	187.274	597.227	1257.2	321.587	702.693	1131.34	122.143	696.11	1129.38	396.821	619.179	1064.75	257.9	701.022	810.618	30.3279	448.528	857.096	20.0129	453.465	856.736	88.6209	375.399	864.931	54.9526	286.042	846.979	74.0457	702.845	822.398	487.612	446.712	849.257	499.439	452.509	860.082	427.989	376.009	866.068	458.249	285.884	849.401	451.446
170	1.69	558.526	1268.32	252.648	611.646	1254.68	187.244	597.235	1257.26	321.56	702.768	1131.19	122.073	696.147	1129.36	396.824	619.153	1064.81	257.899	700.993	810.502	30.3099	448.535	857.105	20.0249	453.452	856.778	88.662	375.392	864.945	54.9648	286.041	847.031	74.0625	702.874	822.341	487.612	446.743	849.245	499.43	452.544	860.041	427.978	376.046	866.081	458.251	285.92	849.412	451.465
171	1.7	558.459	1268.41	252.598	611.647	1254.74	187.216	597.191	1257.35	321.522	702.866	1131.05	121.955	696.192	1129.35	396.839	619.076	1064.88	257.88	700.992	810.353	30.315	448.519	857.133	20.0379	453.427	856.848	88.6646	375.409	864.973	54.9674	286.017	847.102	74.0733	702.907	822.291	487.621	446.764	849.237	499.433	452.609	859.993	427.946	376.057	866.088	458.251	285.962	849.424	451.478
172	1.71	558.433	1268.45	252.54	611.632	1254.76	187.201	597.149	1257.45	321.459	702.937	1130.9	121.861	696.269	1129.33	396.87	619.031	1064.91	257.858	701.022	810.177	30.3087	448.515	857.175	19.9948	453.43	856.863	88.6354	375.408	865.01	54.9376	286	847.16	74.0781	702.944	822.263	487.637	446.776	849.252	499.432	452.646	860.004	427.916	376.064	866.1	458.251	286.007	849.423	451.472
173	1.72	558.498	1268.43	252.468	611.706	1254.77	187.121	597.175	1257.46	321.406	703.065	1130.74	121.72	696.501	1129.32	396.794	619.052	1064.9	257.808	701.041	809.989	30.2882	448.535	857.191	19.9557	453.479	856.841	88.5835	375.414	865.016	54.9269	286.05	847.153	74.0333	702.96	822.213	487.622	446.799	849.275	499.406	452.671	860.018	427.881	376.062	866.105	458.232	286.039	849.428	451.458
174	1.73	558.542	1268.4	252.412	611.786	1254.76	187.064	597.175	1257.44	321.358	703.15	1130.6	121.595	696.785	1129.29	396.715	619.14	1064.87	257.75	701.05	809.846	30.2778	448.578	857.19	19.9335	453.485	856.778	88.5603	375.431	865.008	54.9282	286.073	847.125	73.9971	702.983	822.195	487.589	446.793	849.278	499.388	452.695	860.039	427.868	376.058	866.091	458.216	286.008	849.424	451.43
175	1.74	558.555	1268.33	252.375	611.838	1254.72	187.012	597.178	1257.39	321.31	703.213	1130.48	121.495	696.39	1129.24	396.79	619.158	1064.83	257.676	701.006	809.696	30.3039	448.594	857.169	19.9279	453.498	856.675	88.5257	375.424	864.995	54.9179	286.085	847.094	73.9903	702.955	822.181	487.557	446.76	849.276	499.39	452.624	860.062	427.887	376.039	866.085	458.2	285.955	849.412	451.403
176	1.75	558.615	1268.25	252.343	611.903	1254.67	186.94	597.265	1257.31	321.282	703.252	1130.37	121.413	696.294	1129.2	396.774	619.157	1064.75	257.654	700.948	809.553	30.3359	448.611	857.102	19.9206	453.528	856.584	88.5266	375.424	864.97	54.9266	286.082	847.064	74.0116	702.951	822.181	487.539	446.714	849.288	499.388	452.484	860.098	427.904	376.004	866.076	458.192	285.911	849.417	451.395
177	1.76	558.658	1268.18	252.339	611.889	1254.66	186.943	597.368	1257.23	321.253	703.287	1130.27	121.346	696.265	1129.15	396.75	619.182	1064.64	257.661	700.955	809.459	30.3369	448.626	857.068	19.94	453.542	856.523	88.5486	375.439	864.946	54.9572	286.101	847.024	74.034	702.934	822.175	487.529	446.712	849.306	499.381	452.448	860.149	427.88	375.985	866.08	458.189	285.881	849.429	451.406
178	1.77	558.697	1268.14	252.329	611.888	1254.66	186.922	597.42	1257.2	321.241	703.359	1130.15	121.249	696.274	1129.08	396.758	619.207	1064.54	257.658	700.961	809.392	30.3305	448.636	857.062	19.971	453.578	856.487	88.5485	375.452	864.938	54.9805	286.134	846.983	74.0663	702.997	822.201	487.526	446.716	849.313	499.377	452.427	860.169	427.871	375.978	866.088	458.183	285.867	849.428	451.402
179	1.78	558.723	1268.13	252.265	611.929	1254.66	186.86	597.433	1257.23	321.212	703.388	1130.01	121.155	696.252	1128.99	396.771	619.172	1064.51	257.624	700.918	809.255	30.3503	448.596	857.073	19.9792	453.579	856.461	88.5398	375.49	864.951	54.9776	286.147	846.99	74.0816	703.042	822.183	487.54	446.698	849.321	499.392	452.414	860.153	427.912	375.969	866.087	458.19	285.873	849.431	451.406
180	1.79	558.764	1268.16	252.231	611.935	1254.68	186.806	597.41	1257.32	321.167	703.42	1129.82	121.043	696.271	1128.85	396.82	619.131	1064.54	257.598	700.848	809.061	30.3236	448.555	857.075	19.9939	453.619	856.503	88.5269	375.489	864.959	54.9842	286.155	847.03	74.079	703.048	822.07	487.528	446.675	849.324	499.401	452.414	860.125	427.912	375.986	866.101	458.193	285.902	849.449	451.407
181	1.8	558.791	1268.19	252.206	611.957	1254.7	186.766	597.399	1257.42	321.104	703.468	1129.6	120.903	696.376	1128.69	396.922	619.119	1064.58	257.572	700.736	808.802	30.2866	448.558	857.076	19.9914	453.583	856.564	88.5543	375.503	864.964	54.9879	286.159	847.084	74.0964	703.052	821.911	487.49	446.688	849.299	499.383	452.545	860.047	427.91	376.031	866.116	458.196	285.973	849.457	451.414
182	1.81	558.785	1268.24	252.17	611.998	1254.71	186.709	597.42	1257.48	321.058	703.492	1129.39	120.757	696.71	1128.5	397.008	619.093	1064.65	257.571	700.607	808.477	30.2639	448.546	857.086	19.9723	453.567	856.623	88.576	375.506	864.958	54.9899	286.14	847.129	74.1079	703.039	821.729	487.408	446.751	849.276	499.364	452.625	859.987	427.913	376.09	866.115	458.207	286.016	849.464	451.442
183	1.82	558.773	1268.26	252.118	612.017	1254.71	186.648	597.365	1257.57	321.019	703.544	1129.22	120.632	697.239	1128.29	397.003	619.017	1064.73	257.558	700.487	808.164	30.2468	448.54	857.086	19.9655	453.545	856.655	88.5762	375.496	864.959	54.9621	286.093	847.168	74.1101	703.043	821.528	487.36	446.78	849.255	499.341	452.686	859.92	427.885	376.096	866.11	458.198	286.067	849.451	451.457
184	1.83	558.803	1268.26	252.07	612.016	1254.7	186.606	597.353	1257.6	320.975	703.544	1129.08	120.57	697.409	1128.13	397.066	618.953	1064.74	257.551	700.418	807.926	30.2125	448.517	857.078	19.9627	453.521	856.642	88.5724	375.478	864.98	54.9363	286.065	847.181	74.1008	703.059	821.35	487.311	446.771	849.249	499.327	452.64	859.92	427.844	376.105	866.101	458.186	286.079	849.439	451.449
185	1.84	558.89	1268.24	252.028	612.099	1254.67	186.563	597.422	1257.58	320.94	703.589	1128.99	120.535	697.351	1128.05	397.182	619.003	1064.71	257.541	700.402	807.785	30.1954	448.521	857.073	19.937	453.518	856.593	88.5653	375.447	865.001	54.9396	286.081	847.148	74.0936	703.094	821.267	487.265	446.785	849.26	499.313	452.625	859.922	427.805	376.098	866.091	458.183	286.05	849.432	451.426
186	1.85	559.019	1268.2	251.981	612.233	1254.64	186.49	597.516	1257.57	320.892	703.669	1128.92	120.525	696.973	1128	397.313	619.079	1064.66	257.519	700.414	807.742	30.1661	448.56	857.061	19.8932	453.527	856.503	88.5199	375.445	864.984	54.9568	286.093	847.109	74.1021	703.091	821.233	487.23	446.804	849.286	499.289	452.631	859.949	427.777	376.064	866.086	458.165	286	849.424	451.396
187	1.86	559.136	1268.17	251.895	612.335	1254.63	186.417	597.619	1257.53	320.807	703.717	1128.9	120.504	696.848	1127.96	397.312	619.072	1064.6	257.471	700.385	807.729	30.0957	448.618	857.028	19.8241	453.605	856.385	88.4099	375.44	864.972	54.9397	286.103	847.069	74.0506	703.063	821.198	487.206	446.77	849.34	499.233	452.526	860.028	427.722	375.997	866.09	458.104	285.936	849.422	451.331
188	1.87	559.25	1268.15	251.834	612.452	1254.63	186.369	597.618	1257.54	320.739	703.76	1128.89	120.484	696.794	1127.94	397.284	619.011	1064.56	257.443	700.388	807.736	29.9997	448.627	857.029	19.7659	453.615	856.337	88.3557	375.417	864.977	54.9185	286.114	847.034	74.0039	703.051	821.208	487.167	446.725	849.387	499.186	452.373	860.072	427.662	375.962	866.103	458.063	285.871	849.418	451.286
189	1.88	559.354	1268.18	251.826	612.592	1254.64	186.341	597.681	1257.57	320.743	703.782	1128.87	120.492	696.773	1127.96	397.298	619.061	1064.54	257.454	700.385	807.802	29.8837	448.59	857.038	19.7694	453.653	856.351	88.346	375.402	864.984	54.9198	286.143	847.054	74.0242	703.04	821.234	487.148	446.731	849.418	499.191	452.334	860.114	427.658	375.946	866.118	458.069	285.864	849.448	451.307
190	1.89	559.469	1268.22	251.85	612.69	1254.67	186.342	597.819	1257.62	320.779	703.782	1128.83	120.512	696.777	1127.99	397.33	619.187	1064.5	257.508	700.411	807.855	29.7588	448.589	857.037	19.7944	453.63	856.422	88.3872	375.414	864.994	54.9364	286.14	847.084	74.0684	703.065	821.239	487.148	446.749	849.427	499.21	452.392	860.117	427.713	375.958	866.133	458.108	285.88	849.48	451.359
191	1.9	559.541	1268.28	251.845	612.792	1254.7	186.332	597.875	1257.65	320.784	703.79	1128.8	120.514	696.777	1127.99	397.327	619.214	1064.5	257.513	700.451	807.852	29.6533	448.522	857.048	19.8102	453.631	856.474	88.3983	375.391	864.996	54.9455	286.118	847.118	74.1094	703.107	821.249	487.149	446.738	849.398	499.21	452.425	860.086	427.732	375.995	866.133	458.12	285.903	849.499	451.385
192	1.91	559.639	1268.34	251.837	612.945	1254.75	186.308	597.91	1257.73	320.805	703.832	1128.74	120.523	696.852	1127.99	397.321	619.231	1064.48	257.489	700.45	807.844	29.5871	448.495	857.041	19.7903	453.622	856.541	88.3902	375.4	864.995	54.9583	286.098	847.146	74.1418	703.125	821.219	487.148	446.719	849.352	499.216	452.463	860.022	427.742	376.035	866.125	458.121	285.95	849.488	451.401
193	1.92	559.742	1268.4	251.861	613.138	1254.79	186.289	598.032	1257.77	320.83	703.906	1128.7	120.538	696.948	1127.97	397.321	619.328	1064.47	257.497	700.43	807.828	29.5159	448.499	857.035	19.7859	453.626	856.587	88.4072	375.431	864.996	54.9607	286.097	847.18	74.1547	703.121	821.184	487.157	446.746	849.308	499.236	452.609	859.932	427.78	376.078	866.113	458.151	286.028	849.462	451.425
194	1.93	559.824	1268.46	251.905	613.21	1254.83	186.331	598.12	1257.84	320.891	703.991	1128.67	120.54	697.048	1127.97	397.353	619.424	1064.47	257.523	700.41	807.792	29.4014	448.49	857.028	19.7974	453.647	856.648	88.409	375.456	864.997	54.9693	286.125	847.205	74.1812	703.124	821.161	487.179	446.796	849.294	499.27	452.752	859.901	427.846	376.094	866.111	458.18	286.081	849.458	451.469
195	1.94	559.856	1268.54	251.903	613.222	1254.86	186.36	598.089	1257.9	320.913	704.056	1128.66	120.524	697.107	1127.98	397.331	619.374	1064.51	257.499	700.402	807.814	29.2935	448.494	857.037	19.7693	453.651	856.664	88.3585	375.462	864.991	54.9423	286.134	847.215	74.1685	703.182	821.158	487.181	446.8	849.305	499.259	452.742	859.903	427.807	376.088	866.112	458.166	286.075	849.472	451.457
196	1.95	559.888	1268.57	251.896	613.299	1254.84	186.353	598.116	1257.89	320.883	704.109	1128.7	120.506	697.166	1127.99	397.293	619.328	1064.52	257.442	700.394	807.854	29.1892	448.5	857.047	19.7266	453.69	856.62	88.2718	375.429	864.999	54.905	286.15	847.19	74.1144	703.17	821.165	487.154	446.786	849.338	499.233	452.667	859.93	427.751	376.062	866.11	458.14	286.034	849.466	451.407
197	1.96	559.969	1268.55	251.91	613.342	1254.81	186.353	598.264	1257.84	320.872	704.135	1128.74	120.509	697.199	1128	397.282	619.41	1064.48	257.433	700.396	807.94	29.1017	448.578	857.004	19.6452	453.741	856.551	88.2097	375.444	864.993	54.8824	286.187	847.128	74.0496	703.128	821.168	487.132	446.778	849.367	499.222	452.594	859.997	427.776	376.022	866.107	458.121	286.002	849.457	451.376
198	1.97	560.123	1268.5	251.95	613.399	1254.81	186.344	598.401	1257.8	320.939	704.164	1128.78	120.521	697.184	1128.01	397.259	619.524	1064.42	257.455	700.405	808.065	29.0654	448.644	856.968	19.5847	453.78	856.481	88.1743	375.474	864.96	54.8727	286.212	847.071	74.0442	703.083	821.208	487.159	446.772	849.399	499.211	452.557	860.076	427.78	375.994	866.106	458.107	285.964	849.456	451.354
199	1.98	560.211	1268.48	251.965	613.495	1254.81	186.339	598.504	1257.74	320.947	704.145	1128.83	120.54	697.143	1128.01	397.232	619.552	1064.37	257.449	700.397	808.15	29.0709	448.633	856.941	19.5825	453.703	856.448	88.1505	375.49	864.943	54.8368	286.185	847.034	74.0367	703.044	821.249	487.16	446.707	849.414	499.187	452.419	860.136	427.733	375.943	866.107	458.084	285.885	849.459	451.314
200	1.99	560.268	1268.49	251.993	613.548	1254.82	186.36	598.602	1257.74	320.962	704.104	1128.88	120.564	697.086	1128.04	397.226	619.568	1064.35	257.454	700.405	808.222	29.0745	448.624	856.937	19.5703	453.708	856.435	88.127	375.48	864.936	54.8276	286.166	847.03	74.0345	702.984	821.288	487.143	446.673	849.411	499.174	452.279	860.18	427.736	375.919	866.12	458.073	285.83	849.467	451.295
201	2	560.363	1268.51	252.071	613.555	1254.82	186.415	598.688	1257.79	321.068	704.116	1128.89	120.607	697.128	1128.06	397.275	619.673	1064.33	257.527	700.414	808.26	29.0978	448.611	856.955	19.6111	453.704	856.492	88.1793	375.486	864.938	54.8624	286.215	847.042	74.0622	702.951	821.266	487.143	446.708	849.411	499.197	452.286	860.172	427.787	375.929	866.138	458.106	285.864	849.482	451.336
202	2.01	560.427	1268.58	252.16	613.586	1254.87	186.481	598.708	1257.93	321.144	704.18	1128.89	120.665	697.226	1128.04	397.362	619.779	1064.35	257.606	700.416	808.278	29.1192	448.574	856.987	19.6771	453.719	856.583	88.257	375.504	864.934	54.9121	286.224	847.103	74.1078	702.973	821.209	487.163	446.753	849.409	499.22	452.402	860.133	427.829	376.007	866.15	458.141	285.926	849.498	451.393
203	2.02	560.397	1268.69	252.193	613.593	1254.91	186.489	598.666	1258.06	321.17	704.206	1128.89	120.686	697.298	1128	397.415	619.824	1064.4	257.623	700.411	808.303	29.1111	448.546	857.028	19.6871	453.71	856.683	88.2894	375.493	864.954	54.9114	286.208	847.151	74.1344	703.077	821.165	487.174	446.765	849.38	499.207	452.58	860.052	427.811	376.05	866.148	458.15	285.974	849.513	451.417
204	2.03	560.383	1268.79	252.201	613.603	1254.94	186.502	598.599	1258.2	321.194	704.219	1128.89	120.683	697.366	1127.95	397.462	619.785	1064.48	257.634	700.406	808.313	29.1225	448.468	857.079	19.7057	453.705	856.77	88.2801	375.457	864.99	54.9005	286.175	847.198	74.1331	703.148	821.096	487.168	446.784	849.337	499.205	452.634	859.965	427.773	376.076	866.14	458.162	286.046	849.494	451.421
205	2.04	560.464	1268.82	252.252	613.657	1254.96	186.567	598.607	1258.27	321.256	704.246	1128.89	120.731	697.484	1127.87	397.54	619.89	1064.47	257.706	700.47	808.339	29.1401	448.482	857.083	19.7089	453.691	856.79	88.3257	375.456	865.011	54.9131	286.169	847.213	74.1301	703.206	821.041	487.171	446.836	849.308	499.241	452.729	859.897	427.806	376.136	866.122	458.193	286.133	849.473	451.442
206	2.05	560.555	1268.79	252.303	613.728	1254.95	186.589	598.656	1258.26	321.312	704.266	1128.88	120.792	697.569	1127.78	397.61	619.97	1064.44	257.769	700.471	808.343	29.1345	448.533	857.053	19.706	453.691	856.756	88.3415	375.488	865.01	54.9199	286.179	847.207	74.148	703.212	820.961	487.167	446.867	849.293	499.281	452.787	859.902	427.859	376.163	866.101	458.206	286.161	849.449	451.456
207	2.06	560.574	1268.74	252.316	613.74	1254.93	186.608	598.729	1258.2	321.337	704.244	1128.91	120.805	697.571	1127.67	397.651	619.927	1064.42	257.782	700.405	808.376	29.09	448.528	857.021	19.6731	453.643	856.683	88.2915	375.474	864.982	54.8949	286.193	847.162	74.1308	703.23	820.946	487.177	446.816	849.288	499.278	452.759	859.901	427.87	376.121	866.088	458.175	286.098	849.424	451.413
208	2.07	560.552	1268.71	252.304	613.746	1254.91	186.619	598.769	1258.13	321.329	704.174	1128.94	120.795	697.544	1127.6	397.673	619.859	1064.41	257.77	700.416	808.445	29.0636	448.524	857.005	19.6298	453.625	856.604	88.2105	375.442	864.971	54.87	286.156	847.103	74.0776	703.209	820.947	487.154	446.715	849.295	499.248	452.62	859.962	427.817	376.027	866.09	458.132	285.999	849.413	451.338
209	2.08	560.581	1268.69	252.357	613.708	1254.9	186.679	598.809	1258.07	321.358	704.141	1128.97	120.831	697.51	1127.56	397.71	619.906	1064.33	257.815	700.431	808.518	29.0721	448.543	857.009	19.607	453.685	856.528	88.1704	375.413	864.954	54.8754	286.133	847.05	74.065	703.18	820.972	487.135	446.668	849.328	499.263	452.535	860.041	427.773	375.971	866.095	458.115	285.919	849.43	451.317
210	2.09	560.654	1268.68	252.446	613.745	1254.91	186.758	598.923	1258.03	321.41	704.142	1129.03	120.889	697.507	1127.5	397.753	619.973	1064.27	257.859	700.402	808.595	29.0687	448.553	857.03	19.6165	453.693	856.508	88.175	375.435	864.95	54.8851	286.161	847.034	74.0804	703.186	821.004	487.139	446.67	849.375	499.283	452.439	860.132	427.782	375.961	866.117	458.117	285.895	849.459	451.308
211	2.1	560.621	1268.71	252.496	613.775	1254.93	186.819	598.938	1258.03	321.466	704.112	1129.09	120.929	697.458	1127.48	397.767	619.937	1064.27	257.854	700.413	808.651	29.0579	448.551	857.071	19.5836	453.699	856.548	88.1288	375.443	864.966	54.8551	286.162	847.061	74.0641	703.174	820.971	487.132	446.635	849.399	499.269	452.314	860.182	427.782	375.934	866.14	458.104	285.855	849.494	451.287
212	2.11	560.572	1268.76	252.562	613.716	1254.99	186.881	598.877	1258.07	321.533	704.099	1129.1	120.946	697.394	1127.47	397.806	619.861	1064.3	257.846	700.452	808.686	29.0626	448.513	857.093	19.5876	453.692	856.608	88.1009	375.393	864.994	54.8334	286.136	847.108	74.0399	703.154	820.902	487.117	446.627	849.408	499.245	452.288	860.177	427.762	375.943	866.161	458.095	285.85	849.534	451.281
213	2.12	560.58	1268.81	252.727	613.678	1255.02	186.992	598.834	1258.16	321.654	704.135	1129.11	121.001	697.447	1127.44	397.904	619.896	1064.32	257.915	700.433	808.669	29.0542	448.512	857.093	19.6161	453.659	856.691	88.1835	375.431	865.016	54.8468	286.167	847.179	74.0853	703.162	820.812	487.112	446.706	849.383	499.243	452.437	860.126	427.783	376.025	866.169	458.129	285.942	849.547	451.331
214	2.13	560.618	1268.87	252.911	613.629	1255.04	187.098	598.75	1258.29	321.799	704.16	1129.08	121.08	697.503	1127.42	398.017	619.967	1064.31	258.012	700.417	808.645	29.055	448.529	857.1	19.6674	453.654	856.791	88.2473	375.49	865.01	54.8837	286.183	847.229	74.1385	703.231	820.72	487.105	446.801	849.345	499.268	452.655	860.035	427.836	376.112	866.161	458.176	286.059	849.532	451.393
215	2.14	560.538	1268.91	253.054	613.507	1255.07	187.24	598.535	1258.45	321.946	704.158	1129.05	121.131	697.452	1127.39	398.11	619.915	1064.35	258.101	700.429	808.633	29.0361	448.475	857.101	19.6994	453.634	856.868	88.29	375.462	864.993	54.8873	286.175	847.249	74.156	703.201	820.592	487.07	446.82	849.302	499.259	452.748	859.933	427.838	376.13	866.149	458.199	286.106	849.507	451.425
216	2.15	560.409	1268.9	253.182	613.349	1255.08	187.383	598.425	1258.47	322.075	704.114	1129.02	121.164	697.377	1127.34	398.197	619.818	1064.35	258.181	700.413	808.603	29.0238	448.477	857.075	19.7065	453.584	856.843	88.3198	375.434	864.978	54.8764	286.141	847.245	74.1622	703.21	820.518	487.056	446.817	849.264	499.251	452.71	859.865	427.83	376.121	866.135	458.205	286.104	849.47	451.432
217	2.16	560.446	1268.8	253.345	613.228	1255.03	187.521	598.532	1258.37	322.186	704.066	1128.98	121.221	697.346	1127.29	398.277	619.908	1064.26	258.237	700.419	808.569	29.0087	448.526	857.037	19.705	453.598	856.749	88.2828	375.444	864.946	54.8779	286.185	847.168	74.1407	703.212	820.462	487.034	446.825	849.238	499.271	452.702	859.85	427.839	376.137	866.112	458.22	286.116	849.429	451.439
218	2.17	560.462	1268.69	253.507	613.101	1254.97	187.683	598.665	1258.23	322.274	704.069	1128.96	121.265	697.326	1127.25	398.328	619.969	1064.18	258.277	700.394	808.556	28.9869	448.551	857.01	19.6751	453.696	856.637	88.2278	375.484	864.921	54.8644	286.217	847.087	74.1062	703.183	820.444	487.018	446.82	849.252	499.266	452.722	859.889	427.861	376.111	866.092	458.218	286.091	849.397	451.401
219	2.18	560.355	1268.62	253.619	612.88	1254.93	187.875	598.681	1258.06	322.314	704.05	1129	121.281	697.182	1127.22	398.347	619.911	1064.13	258.282	700.372	808.606	28.9962	448.575	857.004	19.6178	453.737	856.537	88.1537	375.485	864.911	54.8374	286.222	847.021	74.046	703.17	820.503	487.006	446.759	849.298	499.232	452.58	859.971	427.79	376.041	866.078	458.189	285.987	849.401	451.338
220	2.19	560.2	1268.57	253.729	612.74	1254.92	188.019	598.72	1257.88	322.359	704.007	1129.06	121.325	697.069	1127.21	398.371	619.881	1064.11	258.26	700.403	808.687	29.0329	448.567	857.004	19.5485	453.756	856.475	88.0818	375.468	864.915	54.8076	286.203	846.991	73.9971	703.126	820.554	486.989	446.699	849.368	499.198	452.339	860.083	427.75	375.945	866.088	458.169	285.882	849.43	451.293
221	2.2	560.096	1268.52	253.914	612.638	1254.94	188.17	598.712	1257.79	322.475	703.974	1129.1	121.393	697.037	1127.23	398.421	619.917	1064.09	258.297	700.451	808.781	29.0542	448.582	857.01	19.5433	453.766	856.475	88.0811	375.484	864.93	54.8048	286.198	847.003	74.0153	703.116	820.588	486.994	446.667	849.412	499.198	452.266	860.158	427.733	375.945	866.106	458.194	285.854	849.463	451.294
222	2.21	559.921	1268.5	254.137	612.528	1254.97	188.37	598.557	1257.8	322.661	703.96	1129.12	121.478	696.995	1127.23	398.49	619.971	1064.07	258.358	700.449	808.818	29.0687	448.557	857.063	19.6086	453.759	856.544	88.1135	375.5	864.95	54.824	286.207	847.048	74.0429	703.107	820.613	487.008	446.672	849.433	499.196	452.312	860.202	427.736	375.963	866.115	458.231	285.828	849.503	451.326
223	2.22	559.732	1268.47	254.332	612.407	1254.98	188.529	598.248	1257.92	322.843	703.922	1129.08	121.537	696.926	1127.23	398.574	619.869	1064.12	258.416	700.394	808.789	29.0453	448.526	857.099	19.6245	453.671	856.653	88.1743	375.427	864.978	54.8524	286.149	847.104	74.0712	703.109	820.605	487.003	446.661	849.424	499.177	452.314	860.164	427.723	375.946	866.111	458.276	285.827	849.535	451.369
224	2.23	559.555	1268.44	254.51	612.262	1254.98	188.663	598.097	1257.92	322.986	703.926	1129.04	121.58	696.872	1127.21	398.663	619.796	1064.17	258.493	700.436	808.817	29.0486	448.437	857.125	19.679	453.585	856.748	88.2178	375.405	864.99	54.8503	286.084	847.173	74.1038	703.136	820.558	487	446.673	849.378	499.163	452.343	860.091	427.703	375.98	866.104	458.325	285.872	849.544	451.418
225	2.24	559.501	1268.37	254.687	612.209	1254.98	188.804	597.983	1257.87	323.171	703.972	1129	121.663	696.885	1127.15	398.748	619.829	1064.17	258.57	700.431	808.801	29.0653	448.459	857.123	19.7153	453.61	856.773	88.2846	375.438	864.998	54.8555	286.127	847.209	74.1388	703.145	820.469	487.015	446.753	849.341	499.182	452.504	859.991	427.72	376.049	866.084	458.378	285.95	849.509	451.469
226	2.25	559.525	1268.24	254.823	612.193	1254.96	188.934	598.017	1257.71	323.308	703.981	1128.99	121.753	696.893	1127.1	398.828	619.87	1064.16	258.635	700.467	808.806	29.0727	448.481	857.09	19.7192	453.625	856.75	88.3132	375.472	864.987	54.8779	286.158	847.201	74.1445	703.175	820.406	487.015	446.824	849.312	499.188	452.675	859.897	427.739	376.113	866.048	458.412	286.028	849.466	451.492
227	2.26	559.457	1268.11	254.898	612.158	1254.91	189.014	597.962	1257.6	323.378	703.969	1128.98	121.798	696.865	1127.05	398.876	619.886	1064.13	258.654	700.508	808.821	29.0902	448.498	857.094	19.702	453.619	856.705	88.271	375.452	864.981	54.879	286.143	847.174	74.1095	703.191	820.373	487.023	446.841	849.302	499.168	452.705	859.833	427.713	376.125	866.014	458.419	286.053	849.415	451.477
228	2.27	559.353	1268	254.961	612.065	1254.88	189.078	597.835	1257.46	323.443	703.963	1129.01	121.827	696.791	1127.02	398.917	619.851	1064.1	258.67	700.487	808.808	29.0962	448.539	857.093	19.6461	453.661	856.672	88.2358	375.433	864.981	54.8444	286.129	847.136	74.0851	703.201	820.354	487.025	446.828	849.306	499.15	452.655	859.834	427.706	376.107	865.983	458.406	286.033	849.385	451.46
229	2.28	559.238	1267.92	255.058	612.006	1254.85	189.157	597.696	1257.35	323.57	703.95	1129.04	121.865	696.769	1127.02	398.978	619.815	1064.1	258.725	700.512	808.837	29.1269	448.55	857.092	19.6381	453.686	856.66	88.2393	375.425	864.999	54.8428	286.16	847.123	74.074	703.176	820.354	487.019	446.837	849.324	499.148	452.647	859.877	427.726	376.104	865.991	458.405	286.001	849.4	451.462
230	2.29	559.103	1267.85	255.128	611.95	1254.82	189.224	597.409	1257.28	323.724	703.883	1129.05	121.922	696.722	1127.01	399.025	619.798	1064.11	258.772	700.518	808.844	29.152	448.564	857.092	19.6229	453.693	856.645	88.233	375.421	865.017	54.8408	286.164	847.129	74.0677	703.175	820.382	487.001	446.824	849.36	499.146	452.587	859.954	427.704	376.073	866.015	458.393	285.947	849.441	451.457
231	2.3	558.982	1267.76	255.172	611.857	1254.78	189.293	597.082	1257.19	323.789	703.802	1129.05	121.97	696.593	1126.97	399.048	619.769	1064.11	258.789	700.474	808.836	29.1346	448.499	857.095	19.6072	453.671	856.619	88.2073	375.424	864.993	54.8037	286.134	847.094	74.046	703.095	820.365	486.964	446.76	849.388	499.134	452.426	860.039	427.698	376.019	866.028	458.382	285.875	849.473	451.421
232	2.31	558.844	1267.67	255.204	611.76	1254.72	189.345	596.859	1257.06	323.845	703.752	1129.05	122.018	696.505	1126.95	399.076	619.772	1064.1	258.806	700.452	808.836	29.1566	448.49	857.1	19.596	453.664	856.61	88.1801	375.422	864.973	54.7736	286.137	847.073	74.0223	703.039	820.363	486.936	446.71	849.402	499.119	452.31	860.096	427.689	375.978	866.045	458.376	285.828	849.499	451.398
233	2.32	558.735	1267.57	255.261	611.72	1254.64	189.405	596.643	1256.97	323.948	703.73	1129.04	122.075	696.47	1126.92	399.134	619.749	1064.09	258.874	700.489	808.846	29.2045	448.503	857.118	19.6002	453.668	856.624	88.1769	375.415	864.962	54.8032	286.147	847.069	74.0281	703.058	820.342	486.937	446.685	849.39	499.125	452.284	860.144	427.689	375.982	866.052	458.379	285.81	849.506	451.403
234	2.33	558.624	1267.46	255.335	611.627	1254.58	189.485	596.422	1256.9	324.07	703.737	1129.04	122.119	696.498	1126.88	399.207	619.704	1064.09	258.949	700.5	808.862	29.2403	448.545	857.089	19.6093	453.715	856.632	88.1766	375.421	864.952	54.7993	286.134	847.082	74.0338	703.056	820.299	486.949	446.7	849.374	499.151	452.351	860.125	427.719	376.003	866.042	458.394	285.847	849.506	451.416
235	2.34	558.446	1267.37	255.38	611.519	1254.51	189.547	596.28	1256.81	324.108	703.694	1129.05	122.172	696.512	1126.84	399.268	619.64	1064.11	259.008	700.491	808.858	29.2482	448.522	857.096	19.6193	453.643	856.639	88.2034	375.428	864.962	54.7824	286.135	847.088	74.0298	703.085	820.266	486.974	446.717	849.354	499.17	452.421	860.061	427.739	376.014	866.033	458.402	285.893	849.494	451.429
236	2.35	558.318	1267.27	255.401	611.426	1254.47	189.584	596.178	1256.71	324.158	703.672	1129.03	122.227	696.534	1126.8	399.322	619.636	1064.1	259.041	700.564	808.905	29.2871	448.519	857.087	19.6299	453.618	856.638	88.199	375.433	864.972	54.7915	286.146	847.107	74.03	703.127	820.216	486.992	446.738	849.332	499.169	452.455	859.994	427.717	376.055	866.016	458.403	285.944	849.454	451.437
237	2.36	558.188	1267.18	255.456	611.331	1254.43	189.671	596.135	1256.62	324.225	703.68	1129.02	122.28	696.56	1126.78	399.401	619.65	1064.08	259.095	700.591	808.929	29.2961	448.529	857.101	19.6496	453.629	856.655	88.2117	375.45	864.978	54.8195	286.18	847.106	74.0536	703.137	820.171	486.975	446.797	849.308	499.187	452.573	859.913	427.731	376.09	866	458.406	286.01	849.426	451.447
238	2.37	558.051	1267.1	255.526	611.244	1254.37	189.737	596.05	1256.58	324.298	703.664	1129.03	122.34	696.553	1126.74	399.478	619.667	1064.08	259.142	700.566	808.934	29.3059	448.532	857.121	19.6766	453.645	856.679	88.2241	375.442	864.977	54.8432	286.159	847.119	74.0755	703.177	820.153	486.962	446.825	849.292	499.188	452.644	859.858	427.773	376.109	865.997	458.421	286.046	849.404	451.455
239	2.38	557.915	1267	255.582	611.159	1254.32	189.779	595.894	1256.51	324.349	703.58	1129.06	122.41	696.494	1126.74	399.521	619.592	1064.13	259.175	700.574	808.987	29.3295	448.538	857.115	19.6875	453.607	856.722	88.279	375.426	864.988	54.8476	286.142	847.139	74.0936	703.199	820.17	486.966	446.799	849.292	499.188	452.609	859.862	427.754	376.108	866.01	458.43	286.007	849.415	451.466
240	2.39	557.764	1266.88	255.627	611.016	1254.25	189.82	595.753	1256.45	324.399	703.483	1129.08	122.449	696.36	1126.73	399.553	619.546	1064.14	259.204	700.581	809.028	29.316	448.461	857.141	19.7337	453.577	856.736	88.3014	375.381	864.983	54.8502	286.096	847.155	74.104	703.201	820.21	486.974	446.747	849.305	499.179	452.562	859.892	427.727	376.071	866.024	458.412	285.936	849.444	451.45
241	2.4	557.62	1266.75	255.663	610.857	1254.17	189.864	595.674	1256.35	324.44	703.404	1129.11	122.498	696.248	1126.72	399.58	619.558	1064.11	259.221	700.567	809.073	29.3056	448.431	857.143	19.7421	453.576	856.71	88.2799	375.395	864.968	54.8512	286.062	847.142	74.1006	703.158	820.232	486.965	446.711	849.326	499.167	452.51	859.951	427.721	376.041	866.036	458.393	285.872	849.477	451.435
242	2.41	557.485	1266.62	255.667	610.771	1254.11	189.882	595.557	1256.25	324.456	703.318	1129.15	122.548	696.191	1126.7	399.594	619.57	1064.08	259.219	700.53	809.086	29.286	448.479	857.106	19.6752	453.624	856.658	88.2485	375.397	864.971	54.8309	286.039	847.108	74.0783	703.139	820.238	486.962	446.692	849.35	499.158	452.39	860.017	427.727	376	866.044	458.383	285.832	849.493	451.412
243	2.42	557.316	1266.5	255.659	610.648	1254.04	189.931	595.396	1256.19	324.489	703.251	1129.16	122.564	696.112	1126.68	399.6	619.564	1064.06	259.205	700.52	809.077	29.2837	448.513	857.114	19.6387	453.615	856.616	88.1924	375.401	864.972	54.8105	286.061	847.086	74.0624	703.116	820.222	486.948	446.667	849.376	499.158	452.353	860.06	427.712	375.968	866.039	458.375	285.796	849.494	451.386
244	2.43	557.127	1266.4	255.655	610.532	1253.99	189.956	595.267	1256.14	324.513	703.214	1129.16	122.554	696.051	1126.66	399.619	619.524	1064.07	259.196	700.539	809.042	29.2745	448.507	857.114	19.6202	453.636	856.575	88.1749	375.385	864.974	54.7991	286.083	847.061	74.0541	703.165	820.218	486.949	446.677	849.386	499.147	452.352	860.077	427.7	375.972	866.038	458.366	285.795	849.492	451.371
245	2.44	557.022	1266.28	255.658	610.418	1253.93	189.979	595.196	1256.08	324.518	703.261	1129.15	122.553	696.036	1126.62	399.636	619.516	1064.07	259.184	700.52	809.015	29.228	448.524	857.096	19.601	453.689	856.57	88.1473	375.398	864.975	54.7975	286.11	847.054	74.0302	703.165	820.183	486.924	446.727	849.371	499.148	452.367	860.077	427.702	375.997	866.02	458.359	285.832	849.477	451.36
246	2.45	556.912	1266.17	255.664	610.305	1253.86	189.985	595.118	1256.04	324.498	703.301	1129.13	122.539	696.048	1126.57	399.657	619.51	1064.07	259.176	700.492	808.979	29.2051	448.549	857.098	19.5759	453.691	856.566	88.1034	375.421	864.976	54.7715	286.119	847.051	73.999	703.137	820.136	486.91	446.754	849.348	499.152	452.439	860.012	427.708	376.018	866.011	458.351	285.892	849.457	451.356
247	2.46	556.759	1266.08	255.666	610.166	1253.8	190.003	595.017	1256	324.477	703.271	1129.11	122.536	696.062	1126.52	399.686	619.465	1064.1	259.188	700.47	808.959	29.1866	448.584	857.081	19.5389	453.681	856.612	88.1082	375.407	864.972	54.7542	286.091	847.074	73.9941	703.136	820.104	486.926	446.758	849.31	499.154	452.474	859.928	427.712	376.047	865.999	458.363	285.917	849.44	451.374
248	2.47	556.583	1266	255.698	610.094	1253.75	190.029	594.892	1255.96	324.507	703.27	1129.09	122.537	696.039	1126.48	399.728	619.36	1064.21	259.23	700.513	808.987	29.1641	448.52	857.098	19.594	453.651	856.689	88.1703	375.396	864.961	54.7728	286.078	847.12	74.0432	703.145	820.069	486.935	446.748	849.268	499.167	452.548	859.847	427.737	376.08	866.004	458.405	285.937	849.425	451.418
249	2.48	556.467	1265.92	255.75	610.019	1253.7	190.077	594.781	1255.93	324.57	703.294	1129.08	122.556	696.019	1126.44	399.785	619.35	1064.32	259.288	700.513	809.017	29.1699	448.446	857.135	19.678	453.615	856.768	88.2427	375.403	864.958	54.8065	286.051	847.15	74.0956	703.147	820.049	486.934	446.775	849.241	499.199	452.656	859.815	427.774	376.109	866.011	458.46	285.966	849.451	451.467
250	2.49	556.429	1265.79	255.77	609.866	1253.63	190.13	594.695	1255.89	324.581	703.267	1129.09	122.569	695.989	1126.41	399.814	619.353	1064.37	259.287	700.481	809.038	29.1561	448.424	857.141	19.6797	453.597	856.799	88.2661	375.401	864.962	54.8184	286.045	847.148	74.1163	703.124	820.048	486.921	446.787	849.222	499.225	452.654	859.824	427.807	376.106	866.008	458.492	285.952	849.458	451.502
251	2.5	556.352	1265.68	255.747	609.777	1253.53	190.117	594.643	1255.81	324.544	703.211	1129.11	122.58	695.962	1126.39	399.804	619.357	1064.36	259.241	700.409	809.025	29.1178	448.41	857.11	19.6649	453.636	856.738	88.2256	375.414	864.947	54.7939	286.061	847.103	74.0969	703.054	820.058	486.92	446.758	849.234	499.235	452.598	859.837	427.796	376.076	865.999	458.491	285.894	849.455	451.491
252	2.51	556.278	1265.58	255.702	609.696	1253.45	190.09	594.597	1255.74	324.493	703.194	1129.15	122.548	695.936	1126.35	399.776	619.352	1064.31	259.22	700.405	809.048	29.112	448.466	857.076	19.6208	453.667	856.662	88.1517	375.424	864.948	54.7785	286.062	847.066	74.0552	703.059	820.101	486.94	446.726	849.273	499.222	452.488	859.927	427.766	376.029	865.993	458.476	285.831	849.455	451.448
253	2.52	556.218	1265.48	255.649	609.573	1253.42	190.085	594.479	1255.7	324.46	703.157	1129.18	122.509	695.885	1126.32	399.734	619.314	1064.26	259.206	700.429	809.082	29.1065	448.552	857.054	19.5548	453.683	856.584	88.1096	375.397	864.966	54.7592	286.075	847.042	74.022	703.088	820.161	486.939	446.709	849.323	499.203	452.426	859.977	427.743	375.974	865.983	458.441	285.773	849.458	451.399
254	2.53	556.112	1265.41	255.607	609.493	1253.39	190.047	594.416	1255.66	324.38	703.146	1129.2	122.458	695.83	1126.29	399.693	619.254	1064.24	259.168	700.413	809.096	29.0925	448.544	857.065	19.5179	453.698	856.545	88.0672	375.355	864.976	54.726	286.096	847.025	73.9931	703.054	820.183	486.941	446.663	849.366	499.191	452.364	860.007	427.704	375.925	865.99	458.415	285.729	849.455	451.356
255	2.54	555.992	1265.37	255.564	609.419	1253.37	190.013	594.309	1255.64	324.318	703.131	1129.18	122.403	695.822	1126.29	399.644	619.197	1064.26	259.123	700.401	809.077	29.1259	448.493	857.089	19.5234	453.713	856.53	88.0483	375.368	864.976	54.7073	286.082	847.029	73.9712	703.058	820.2	486.942	446.625	849.382	499.176	452.277	860.034	427.664	375.899	865.995	458.402	285.692	849.477	451.328
256	2.55	555.887	1265.35	255.543	609.333	1253.37	190.022	594.223	1255.63	324.28	703.126	1129.17	122.341	695.826	1126.31	399.649	619.131	1064.32	259.105	700.442	809.074	29.1284	448.491	857.099	19.5371	453.66	856.603	88.0973	375.349	864.984	54.7278	286.041	847.073	73.9683	703.102	820.229	486.944	446.624	849.366	499.169	452.244	860.028	427.674	375.918	865.997	458.412	285.678	849.505	451.337
257	2.56	555.8	1265.33	255.552	609.26	1253.34	190.036	594.169	1255.62	324.302	703.144	1129.15	122.289	695.847	1126.36	399.692	619.048	1064.41	259.115	700.461	809.05	29.1438	448.44	857.116	19.6027	453.555	856.667	88.1903	375.335	865	54.7552	286.014	847.124	74.0143	703.129	820.213	486.933	446.658	849.341	499.163	452.375	859.956	427.709	375.97	866.006	458.436	285.726	849.515	451.378
258	2.57	555.764	1265.29	255.552	609.206	1253.3	190.009	594.153	1255.59	324.293	703.148	1129.13	122.272	695.85	1126.36	399.707	618.955	1064.47	259.131	700.482	809.02	29.1849	448.4	857.119	19.6497	453.508	856.721	88.2433	375.324	865.001	54.7752	286.004	847.152	74.057	703.116	820.169	486.959	446.684	849.301	499.167	452.467	859.87	427.73	376.018	865.993	458.463	285.76	849.487	451.406
259	2.58	555.767	1265.25	255.521	609.174	1253.29	189.956	594.107	1255.58	324.249	703.18	1129.09	122.266	695.887	1126.34	399.709	618.963	1064.48	259.12	700.49	808.993	29.2197	448.369	857.11	19.668	453.551	856.721	88.2364	375.337	864.998	54.7793	286.003	847.149	74.071	703.128	820.137	486.956	446.7	849.263	499.183	452.548	859.813	427.735	376.049	865.977	458.473	285.818	849.449	451.415
260	2.59	555.768	1265.21	255.471	609.134	1253.26	189.932	594.146	1255.54	324.214	703.221	1129.07	122.254	695.94	1126.31	399.698	618.995	1064.47	259.108	700.502	808.965	29.2289	448.383	857.101	19.6605	453.592	856.686	88.221	375.363	864.991	54.7771	286.02	847.125	74.0596	703.156	820.133	486.943	446.727	849.253	499.202	452.609	859.784	427.764	376.072	865.956	458.471	285.865	849.423	451.424
261	2.6	555.756	1265.15	255.402	609.133	1253.19	189.88	594.167	1255.52	324.161	703.213	1129.06	122.217	695.98	1126.29	399.663	619.012	1064.44	259.081	700.521	808.945	29.2297	448.476	857.071	19.6234	453.669	856.626	88.1775	375.373	864.973	54.7696	286.042	847.09	74.0382	703.113	820.115	486.939	446.755	849.264	499.209	452.603	859.779	427.761	376.078	865.944	458.474	285.878	849.402	451.416
262	2.61	555.712	1265.13	255.319	609.205	1253.12	189.758	594.142	1255.53	324.082	703.212	1129.06	122.183	695.972	1126.25	399.623	618.959	1064.45	259.052	700.486	808.901	29.1948	448.523	857.06	19.5856	453.7	856.593	88.1383	375.399	864.957	54.7263	286.023	847.07	74.0242	703.122	820.113	486.945	446.753	849.281	499.204	452.566	859.827	427.76	376.053	865.937	458.462	285.829	849.397	451.388
263	2.62	555.657	1265.12	255.232	609.214	1253.08	189.673	594.129	1255.53	323.988	703.168	1129.06	122.127	695.935	1126.25	399.603	618.922	1064.48	259.015	700.457	808.874	29.1763	448.515	857.056	19.5636	453.673	856.587	88.1198	375.38	864.963	54.688	286.053	847.051	74.0081	703.121	820.139	486.953	446.73	849.299	499.177	452.497	859.897	427.723	376.016	865.939	458.426	285.77	849.425	451.347
264	2.63	555.612	1265.12	255.15	609.184	1253.05	189.621	594.126	1255.56	323.912	703.099	1129.07	122.06	695.897	1126.26	399.577	618.926	1064.48	258.997	700.446	808.869	29.1754	448.523	857.031	19.5461	453.647	856.589	88.1089	375.386	864.965	54.6863	286.043	847.046	73.9937	703.094	820.187	486.944	446.709	849.318	499.169	452.359	859.955	427.71	375.948	865.966	458.407	285.718	849.461	451.312
265	2.64	555.598	1265.12	255.064	609.169	1253	189.562	594.858	1255.39	323.63	703.049	1129.06	122.028	695.898	1126.27	399.553	618.871	1064.49	258.974	700.427	808.835	29.1821	448.533	857.008	19.5419	453.636	856.587	88.0901	375.376	864.959	54.6883	285.993	847.06	73.9868	703.031	820.221	486.934	446.681	849.327	499.165	452.289	860.004	427.722	375.937	865.988	458.402	285.665	849.477	451.287
266	2.65	555.608	1265.11	254.98	609.227	1252.95	189.472	595.751	1255.17	323.317	703.032	1129.06	121.987	695.975	1126.29	399.539	618.884	1064.5	258.947	700.411	808.808	29.1693	448.541	857	19.5205	453.669	856.56	88.0674	375.398	864.965	54.6627	285.996	847.038	73.9765	702.994	820.224	486.946	446.654	849.336	499.174	452.286	860.017	427.716	375.95	865.986	458.396	285.639	849.486	451.288
267	2.66	555.616	1265.12	254.887	609.221	1252.93	189.394	594.443	1255.5	323.56	703.022	1129.05	121.943	696.001	1126.26	399.501	618.841	1064.54	258.936	700.385	808.764	29.1522	448.524	857.008	19.5279	453.652	856.548	88.091	375.379	864.958	54.6581	286.025	847.032	73.9642	703.026	820.242	486.963	446.63	849.332	499.181	452.289	860.008	427.702	375.932	865.982	458.39	285.639	849.485	451.291
268	2.67	555.6	1265.15	254.825	609.275	1252.94	189.332	594.143	1255.63	323.583	703.021	1129.02	121.912	695.985	1126.26	399.493	618.794	1064.6	258.956	700.352	808.729	29.1762	448.518	857.044	19.5432	453.642	856.576	88.1242	375.358	864.978	54.6742	286.006	847.064	73.9727	703.087	820.263	486.983	446.645	849.32	499.201	452.32	859.968	427.733	375.934	865.988	458.409	285.676	849.479	451.315
269	2.68	555.565	1265.21	254.744	609.3	1252.96	189.271	594.04	1255.7	323.538	703.032	1129	121.866	696.064	1126.31	399.495	618.771	1064.65	258.938	700.395	808.733	29.2205	448.5	857.055	19.5518	453.625	856.629	88.1337	375.358	864.999	54.6698	285.974	847.115	73.9878	703.062	820.269	486.98	446.677	849.305	499.207	452.383	859.913	427.74	375.962	865.999	458.432	285.712	849.476	451.347
270	2.69	555.597	1265.25	254.646	609.359	1252.96	189.187	594.044	1255.73	323.458	703.033	1128.99	121.811	696.125	1126.34	399.474	618.713	1064.72	258.897	700.451	808.733	29.2635	448.467	857.047	19.5431	453.567	856.675	88.1401	375.34	865.022	54.6675	285.988	847.14	73.9781	703.072	820.253	486.998	446.687	849.285	499.213	452.44	859.845	427.728	376.008	865.992	458.442	285.74	849.471	451.363
271	2.7	555.627	1265.27	254.555	609.453	1252.94	189.104	594.065	1255.76	323.391	703.055	1128.95	121.749	696.174	1126.32	399.424	618.702	1064.74	258.848	700.429	808.684	29.2914	448.455	857.044	19.5461	453.573	856.676	88.1248	375.351	865.026	54.6634	285.99	847.142	73.9708	703.113	820.262	487.011	446.709	849.262	499.214	452.446	859.806	427.734	376.011	865.973	458.44	285.748	849.452	451.359
272	2.71	555.707	1265.24	254.501	609.504	1252.92	189.04	594.138	1255.75	323.331	703.065	1128.91	121.716	696.219	1126.33	399.393	618.761	1064.72	258.833	700.442	808.654	29.2933	448.465	857.012	19.5472	453.601	856.638	88.1408	375.391	865.011	54.6502	285.973	847.126	73.9834	703.104	820.282	487.01	446.708	849.256	499.223	452.51	859.787	427.76	376.015	865.953	458.44	285.758	849.423	451.358
273	2.72	555.787	1265.23	254.438	609.552	1252.92	188.975	594.148	1255.76	323.264	703.043	1128.88	121.677	696.239	1126.34	399.367	618.806	1064.69	258.812	700.436	808.643	29.2836	448.442	857.001	19.5624	453.614	856.612	88.144	375.37	865.013	54.6505	285.942	847.105	73.9754	703.107	820.321	487.029	446.692	849.265	499.239	452.488	859.815	427.773	376.016	865.942	458.443	285.743	849.416	451.371
274	2.73	555.867	1265.22	254.355	609.555	1252.91	188.901	594.172	1255.77	323.21	703.034	1128.87	121.612	696.224	1126.35	399.325	618.834	1064.7	258.754	700.447	808.644	29.2703	448.48	856.983	19.5355	453.628	856.572	88.0969	375.329	865.012	54.6295	285.918	847.07	73.9569	703.08	820.347	487.039	446.656	849.281	499.232	452.454	859.846	427.754	375.986	865.956	458.438	285.698	849.427	451.348
275	2.74	555.908	1265.24	254.278	609.612	1252.9	188.811	594.158	1255.81	323.155	703.055	1128.88	121.546	696.191	1126.37	399.272	618.838	1064.72	258.699	700.429	808.635	29.2414	448.533	856.963	19.5171	453.64	856.551	88.0584	375.309	865.012	54.6168	285.921	847.03	73.9365	703.059	820.403	487.028	446.634	849.297	499.218	452.403	859.892	427.744	375.962	865.961	458.421	285.668	849.442	451.327
276	2.75	555.947	1265.28	254.23	609.689	1252.89	188.746	594.171	1255.88	323.125	703.067	1128.89	121.471	696.225	1126.41	399.232	618.854	1064.77	258.651	700.429	808.613	29.2335	448.553	856.974	19.4994	453.646	856.533	88.0813	375.346	865.014	54.6153	285.922	847.03	73.9312	703.073	820.45	487.026	446.653	849.315	499.22	452.32	859.952	427.75	375.962	865.978	458.407	285.648	849.473	451.307
277	2.76	555.937	1265.33	254.165	609.739	1252.92	188.673	594.163	1255.96	323.042	703.094	1128.93	121.408	696.257	1126.44	399.192	618.822	1064.87	258.584	700.373	808.571	29.2214	448.547	856.987	19.4718	453.626	856.56	88.0608	375.369	865.026	54.5941	285.896	847.058	73.9142	703.08	820.469	487.031	446.65	849.338	499.217	452.273	859.98	427.735	375.958	866.002	458.395	285.629	849.499	451.281
278	2.77	555.907	1265.38	254.089	609.747	1252.97	188.607	594.124	1256.01	322.956	703.119	1128.94	121.339	696.232	1126.46	399.134	618.773	1065	258.512	700.345	808.529	29.2199	448.502	857.004	19.4469	453.603	856.634	88.0333	375.326	865.049	54.5643	285.88	847.088	73.8941	703.046	820.433	487.022	446.654	849.34	499.195	452.285	859.968	427.711	375.955	866.004	458.39	285.642	849.514	451.279
279	2.78	555.913	1265.42	254.026	609.762	1252.99	188.522	594.068	1256.08	322.897	703.123	1128.91	121.299	696.252	1126.49	399.083	618.731	1065.09	258.44	700.371	808.496	29.1835	448.505	856.998	19.422	453.638	856.675	87.9847	375.351	865.046	54.5284	285.907	847.102	73.8841	703.03	820.408	487.014	446.696	849.317	499.182	452.351	859.95	427.7	375.973	866.001	458.387	285.666	849.503	451.274
280	2.79	555.981	1265.42	254.005	609.765	1252.98	188.484	594.115	1256.09	322.879	703.166	1128.89	121.276	696.319	1126.49	399.079	618.776	1065.09	258.421	700.41	808.5	29.1613	448.508	856.978	19.4243	453.645	856.668	87.9875	375.376	865.027	54.5316	285.944	847.099	73.8866	703.056	820.407	487.028	446.708	849.285	499.198	452.411	859.895	427.715	376.01	865.975	458.407	285.699	849.475	451.3
281	2.8	556.008	1265.43	254	609.818	1252.93	188.445	594.179	1256.1	322.88	703.155	1128.86	121.267	696.356	1126.48	399.042	618.772	1065.09	258.435	700.396	808.484	29.1582	448.527	856.948	19.4326	453.628	856.646	88.003	375.361	865	54.5306	285.915	847.084	73.9098	703.04	820.38	487.04	446.683	849.25	499.223	452.406	859.829	427.719	376.025	865.943	458.416	285.728	849.432	451.325
282	2.81	556.079	1265.42	253.971	609.846	1252.89	188.388	594.252	1256.09	322.864	703.118	1128.84	121.247	696.332	1126.45	399.025	618.734	1065.1	258.411	700.386	808.475	29.145	448.526	856.913	19.4476	453.572	856.646	88.0314	375.368	864.968	54.5437	285.883	847.072	73.9375	703.036	820.383	487.05	446.666	849.23	499.229	452.47	859.759	427.731	376.029	865.923	458.428	285.725	849.407	451.34
283	2.82	556.17	1265.41	253.939	609.839	1252.88	188.347	594.352	1256.05	322.84	703.102	1128.86	121.21	696.327	1126.47	399.011	618.799	1065.1	258.373	700.349	808.474	29.1374	448.494	856.906	19.4848	453.602	856.606	88.0383	375.363	864.955	54.5577	285.892	847.05	73.9264	703.038	820.406	487.061	446.673	849.22	499.228	452.593	859.725	427.753	376.029	865.925	458.419	285.712	849.395	451.34
284	2.83	556.26	1265.42	253.898	609.887	1252.9	188.31	594.458	1256.06	322.797	703.088	1128.88	121.167	696.304	1126.49	398.963	618.888	1065.11	258.343	700.318	808.488	29.1233	448.534	856.883	19.4712	453.635	856.565	88.0453	375.401	864.961	54.5687	285.918	847.024	73.9129	703.036	820.438	487.067	446.687	849.239	499.227	452.575	859.769	427.744	376.033	865.943	458.415	285.709	849.413	451.331
285	2.84	556.326	1265.47	253.858	609.949	1252.91	188.248	594.478	1256.11	322.732	703.056	1128.94	121.15	696.258	1126.53	398.923	618.893	1065.15	258.281	700.338	808.55	29.103	448.52	856.909	19.4707	453.652	856.569	88.0381	375.42	864.975	54.5572	285.938	847.022	73.9057	703.032	820.524	487.075	446.669	849.289	499.228	452.483	859.851	427.726	376.006	865.969	458.409	285.666	849.45	451.305
286	2.85	556.339	1265.54	253.79	609.942	1252.95	188.193	594.446	1256.21	322.672	702.998	1129.01	121.112	696.224	1126.62	398.877	618.829	1065.22	258.216	700.375	808.603	29.0874	448.517	856.925	19.4477	453.65	856.593	87.9959	375.391	865.005	54.5224	285.936	847.048	73.8755	703.057	820.585	487.092	446.639	849.337	499.209	452.342	859.92	427.71	375.975	866.005	458.381	285.613	849.482	451.264
287	2.86	556.337	1265.63	253.709	609.978	1252.97	188.112	594.48	1256.28	322.614	702.927	1129.05	121.064	696.17	1126.67	398.821	618.814	1065.27	258.152	700.386	808.638	29.0788	448.565	856.925	19.3929	453.632	856.615	87.976	375.383	865.025	54.4781	285.905	847.069	73.8434	703.019	820.654	487.081	446.637	849.358	499.188	452.214	859.963	427.677	375.978	866.024	458.352	285.602	849.517	451.232
288	2.87	556.415	1265.67	253.639	610.012	1252.99	188.045	594.565	1256.32	322.574	702.914	1129.08	121.041	696.135	1126.69	398.788	618.815	1065.33	258.102	700.353	808.646	29.0632	448.589	856.929	19.3481	453.644	856.633	87.9404	375.422	865.044	54.4574	285.89	847.082	73.8315	703.005	820.708	487.087	446.642	849.361	499.18	452.153	859.982	427.674	376.007	866.036	458.338	285.593	849.53	451.215
289	2.88	556.447	1265.71	253.597	610.022	1253.03	188.012	594.565	1256.36	322.528	702.915	1129.07	121.041	696.106	1126.73	398.796	618.759	1065.39	258.089	700.377	808.677	29.0499	448.511	856.923	19.3793	453.644	856.665	87.9544	375.41	865.05	54.4658	285.909	847.098	73.8437	703.069	820.745	487.102	446.64	849.351	499.184	452.195	859.947	427.656	375.992	866.025	458.349	285.584	849.54	451.227
290	2.89	556.415	1265.8	253.571	609.992	1253.09	188.005	594.516	1256.43	322.503	702.894	1129.02	121.054	696.08	1126.72	398.807	618.656	1065.46	258.121	700.385	808.678	29.013	448.476	856.912	19.4229	453.587	856.703	88.0119	375.358	865.065	54.486	285.871	847.121	73.8603	703.052	820.716	487.096	446.655	849.318	499.207	452.262	859.917	427.676	375.982	866.01	458.36	285.589	849.527	451.267
291	2.9	556.429	1265.85	253.546	609.995	1253.11	187.99	594.553	1256.46	322.488	702.891	1128.98	121.032	696.082	1126.69	398.826	618.603	1065.48	258.122	700.342	808.63	28.9629	448.473	856.903	19.4228	453.556	856.682	88.02	375.337	865.072	54.4856	285.809	847.106	73.8551	703.035	820.659	487.096	446.676	849.277	499.229	452.376	859.862	427.716	375.992	865.984	458.374	285.622	849.492	451.304
292	2.91	556.533	1265.84	253.486	610.035	1253.08	187.937	594.686	1256.43	322.445	702.936	1128.95	120.992	696.073	1126.66	398.809	618.66	1065.46	258.078	700.309	808.584	28.9124	448.516	856.878	19.413	453.59	856.628	87.9946	375.375	865.063	54.4578	285.815	847.075	73.8329	703.03	820.615	487.103	446.702	849.24	499.232	452.473	859.8	427.717	376.035	865.95	458.38	285.669	849.44	451.298
293	2.92	556.625	1265.84	253.413	610.109	1253.05	187.863	594.731	1256.45	322.392	702.944	1128.94	120.952	696.083	1126.63	398.773	618.651	1065.46	258.024	700.347	808.565	28.9009	448.555	856.844	19.3885	453.601	856.584	87.9804	375.434	865.06	54.3923	285.805	847.075	73.792	703.011	820.588	487.116	446.728	849.23	499.229	452.499	859.767	427.709	376.073	865.931	458.384	285.691	849.406	451.285
294	2.93	556.574	1265.89	253.357	610.148	1253.03	187.822	594.669	1256.52	322.336	702.915	1128.95	120.94	696.087	1126.65	398.75	618.597	1065.53	257.99	700.334	808.567	28.8852	448.557	856.829	19.3692	453.576	856.575	87.9745	375.431	865.076	54.3571	285.791	847.069	73.7741	703.024	820.598	487.097	446.73	849.24	499.207	452.482	859.747	427.691	376.069	865.934	458.393	285.668	849.4	451.267
295	2.94	556.558	1265.94	253.333	610.124	1253.05	187.8	594.625	1256.54	322.313	702.87	1128.97	120.93	696.078	1126.69	398.754	618.546	1065.59	257.999	700.257	808.548	28.8415	448.539	856.823	19.3639	453.553	856.593	87.9865	375.422	865.094	54.3443	285.785	847.068	73.7657	703.007	820.629	487.11	446.715	849.263	499.188	452.45	859.767	427.651	376.036	865.949	458.408	285.607	849.43	451.261
296	2.95	556.623	1265.94	253.306	610.115	1253.03	187.797	594.714	1256.52	322.293	702.792	1128.99	120.932	696.014	1126.73	398.756	618.549	1065.63	258.019	700.246	808.561	28.8262	448.553	856.8	19.3996	453.61	856.578	87.9793	375.449	865.101	54.3242	285.775	847.072	73.7368	702.975	820.682	487.117	446.681	849.289	499.173	452.445	859.789	427.628	376.016	865.963	458.411	285.558	849.464	451.254
297	2.96	556.663	1265.93	253.286	610.149	1253.01	187.781	594.774	1256.54	322.29	702.728	1129	120.925	695.951	1126.77	398.739	618.59	1065.64	258.032	700.256	808.593	28.8028	448.552	856.774	19.409	453.653	856.535	87.9726	375.468	865.099	54.2976	285.761	847.025	73.7078	702.956	820.749	487.115	446.639	849.311	499.147	452.384	859.816	427.578	376.036	865.978	458.406	285.524	849.479	451.225
298	2.97	556.693	1265.95	253.279	610.164	1253	187.762	594.743	1256.56	322.304	702.686	1129.01	120.955	695.907	1126.81	398.734	618.558	1065.67	258.046	700.23	808.632	28.8043	448.578	856.754	19.4009	453.63	856.529	88.0046	375.513	865.088	54.2783	285.757	847.012	73.6856	702.93	820.765	487.123	446.603	849.326	499.134	452.326	859.845	427.554	376.034	865.998	458.409	285.49	849.511	451.191
299	2.98	556.675	1265.98	253.272	610.179	1252.99	187.731	594.736	1256.58	322.293	702.665	1129.03	120.964	695.827	1126.82	398.736	618.496	1065.73	258.074	700.225	808.64	28.7924	448.581	856.765	19.4149	453.576	856.545	88.0279	375.458	865.11	54.2929	285.715	847.031	73.6818	702.879	820.761	487.146	446.593	849.336	499.151	452.304	859.847	427.548	376.026	866.011	458.401	285.454	849.539	451.16
300	2.99	556.701	1265.98	253.24	610.224	1252.94	187.694	594.789	1256.6	322.246	702.647	1129.05	120.951	695.812	1126.84	398.727	618.48	1065.78	258.06	700.283	808.662	28.806	448.596	856.76	19.3871	453.619	856.513	88.0086	375.443	865.124	54.2655	285.7	847.023	73.6511	702.865	820.764	487.164	446.616	849.34	499.172	452.327	859.838	427.556	376.027	866.01	458.361	285.466	849.532	451.101
301	3	556.782	1265.96	253.144	610.26	1252.89	187.637	594.885	1256.61	322.18	702.609	1129.07	120.951	695.831	1126.82	398.696	618.477	1065.81	257.99	700.301	808.691	28.7922	448.642	856.748	19.3235	453.647	856.487	87.9506	375.488	865.141	54.1876	285.721	846.989	73.5914	702.869	820.799	487.167	446.614	849.35	499.16	452.251	859.839	427.532	376.033	866.017	458.285	285.482	849.515	451.006
302	3.01	556.77	1265.97	253.057	610.293	1252.87	187.565	594.914	1256.65	322.105	702.639	1129.08	120.95	695.804	1126.82	398.663	618.456	1065.85	257.943	700.298	808.677	28.7701	448.664	856.761	19.2599	453.663	856.493	87.8752	375.489	865.166	54.1433	285.742	846.994	73.5494	702.879	820.797	487.178	446.618	849.371	499.151	452.263	859.814	427.517	376.017	866.024	458.212	285.493	849.513	450.925
303	3.02	556.67	1266.03	253.041	610.295	1252.9	187.536	594.899	1256.67	322.067	702.632	1129.08	120.951	695.783	1126.85	398.682	618.388	1065.95	257.953	700.282	808.692	28.7768	448.63	856.805	19.2461	453.606	856.527	87.8743	375.483	865.177	54.1253	285.719	847.048	73.5704	702.853	820.793	487.22	446.603	849.368	499.17	452.282	859.796	427.521	376.014	866.026	458.191	285.482	849.507	450.896
304	3.03	556.619	1266.07	253.066	610.217	1252.93	187.583	594.817	1256.7	322.113	702.629	1129.07	120.974	695.797	1126.87	398.72	618.303	1066.04	258.006	700.256	808.7	28.7839	448.611	856.811	19.2693	453.595	856.591	87.9017	375.458	865.194	54.1423	285.674	847.102	73.5904	702.847	820.798	487.25	446.612	849.339	499.188	452.36	859.754	427.57	376.02	866.025	458.202	285.509	849.518	450.916
305	3.04	556.631	1266.06	253.054	610.192	1252.93	187.585	594.85	1256.7	322.102	702.606	1129.08	120.981	695.786	1126.89	398.735	618.283	1066.07	258.032	700.277	808.737	28.7822	448.534	856.789	19.3175	453.613	856.622	87.9339	375.44	865.19	54.1641	285.634	847.116	73.6134	702.875	820.802	487.251	446.606	849.307	499.201	452.399	859.746	427.611	376.024	866.008	458.205	285.516	849.51	450.909
306	3.05	556.665	1266.03	253.024	610.207	1252.91	187.57	594.846	1256.67	322.09	702.571	1129.1	121.002	695.784	1126.89	398.724	618.29	1066.08	258.036	700.288	808.758	28.7747	448.487	856.755	19.3434	453.585	856.617	87.9519	375.395	865.181	54.1792	285.625	847.11	73.6255	702.884	820.837	487.276	446.563	849.28	499.213	452.342	859.775	427.631	376.018	865.992	458.206	285.5	849.505	450.903
307	3.06	556.705	1266	253.001	610.201	1252.85	187.562	594.869	1256.67	322.093	702.521	1129.11	121.016	695.765	1126.9	398.744	618.304	1066.1	258.052	700.286	808.785	28.7802	448.507	856.787	19.3488	453.552	856.614	87.9784	375.393	865.169	54.1791	285.616	847.1	73.6302	702.851	820.861	487.305	446.518	849.276	499.252	452.321	859.824	427.688	375.978	865.995	458.203	285.49	849.509	450.9
308	3.07	556.761	1265.98	252.988	610.245	1252.79	187.536	594.951	1256.69	322.074	702.473	1129.14	121.046	695.713	1126.92	398.756	618.311	1066.11	258.083	700.269	808.803	28.7702	448.514	856.771	19.3467	453.558	856.58	87.9959	375.418	865.164	54.1844	285.597	847.101	73.6356	702.822	820.888	487.294	446.497	849.302	499.287	452.305	859.901	427.703	375.96	866.014	458.211	285.48	849.521	450.888
309	3.08	556.78	1265.97	252.941	610.309	1252.8	187.485	594.983	1256.7	322.034	702.43	1129.19	121.058	695.693	1126.94	398.733	618.3	1066.15	258.082	700.244	808.804	28.7725	448.533	856.743	19.3361	453.598	856.549	87.9645	375.427	865.169	54.1637	285.618	847.067	73.614	702.823	820.952	487.292	446.473	849.329	499.283	452.284	859.941	427.689	375.923	866.028	458.199	285.451	849.542	450.854
310	3.09	556.787	1265.98	252.856	610.286	1252.78	187.442	595.065	1256.69	321.939	702.383	1129.21	121.057	695.637	1126.96	398.711	618.254	1066.2	258.025	700.272	808.819	28.7932	448.599	856.726	19.289	453.6	856.539	87.9129	375.414	865.182	54.1103	285.628	847.034	73.551	702.854	820.99	487.315	446.476	849.345	499.267	452.173	860.012	427.672	375.888	866.027	458.169	285.443	849.56	450.804
311	3.1	556.791	1266	252.774	610.309	1252.76	187.389	595.072	1256.7	321.871	702.386	1129.22	121.03	695.629	1126.99	398.683	618.21	1066.24	257.971	700.264	808.827	28.7962	448.68	856.702	19.2138	453.599	856.537	87.8673	375.412	865.19	54.0664	285.637	847.008	73.49	702.85	820.988	487.315	446.447	849.363	499.277	452.126	860.056	427.671	375.862	866.026	458.144	285.443	849.559	450.77
312	3.11	556.795	1266.02	252.732	610.337	1252.78	187.341	595.01	1256.74	321.859	702.415	1129.21	121.022	695.626	1127.01	398.678	618.217	1066.28	257.95	700.253	808.808	28.798	448.64	856.719	19.2243	453.616	856.584	87.8634	375.404	865.208	54.0584	285.626	847.028	73.4729	702.799	820.96	487.298	446.453	849.363	499.297	452.157	860.021	427.698	375.843	866.029	458.133	285.448	849.568	450.763
313	3.12	556.795	1266.03	252.716	610.369	1252.76	187.325	594.938	1256.76	321.851	702.4	1129.19	121.007	695.628	1127.02	398.691	618.158	1066.35	257.984	700.236	808.796	28.7805	448.574	856.735	19.2614	453.583	856.644	87.9012	375.389	865.217	54.0524	285.625	847.025	73.4797	702.774	820.937	487.304	446.459	849.337	499.321	452.228	859.965	427.748	375.837	866.02	458.133	285.453	849.569	450.764
314	3.13	556.765	1266.03	252.717	610.355	1252.77	187.335	594.957	1256.77	321.857	702.412	1129.16	121.003	695.626	1127.02	398.723	618.137	1066.41	258.026	700.174	808.758	28.7812	448.561	856.731	19.2881	453.537	856.679	87.9368	375.395	865.207	54.0478	285.58	847.034	73.4961	702.756	820.884	487.29	446.444	849.295	499.353	452.278	859.903	427.799	375.855	866.009	458.141	285.495	849.551	450.769
315	3.14	556.775	1266.02	252.707	610.346	1252.76	187.345	595.013	1256.73	321.845	702.453	1129.13	120.993	695.656	1126.99	398.735	618.157	1066.45	258.036	700.194	808.741	28.8044	448.564	856.706	19.2669	453.571	856.662	87.9297	375.423	865.186	54.0251	285.551	847.034	73.4928	702.779	820.873	487.305	446.438	849.273	499.383	452.335	859.838	427.814	375.851	865.998	458.138	285.549	849.52	450.782
316	3.15	556.817	1265.99	252.68	610.341	1252.73	187.338	595.094	1256.71	321.813	702.458	1129.1	120.987	695.687	1126.98	398.739	618.186	1066.46	258.028	700.19	808.731	28.8044	448.578	856.694	19.2698	453.58	856.644	87.9365	375.443	865.186	54.0195	285.542	847.017	73.4672	702.79	820.864	487.305	446.439	849.253	499.405	452.349	859.849	427.857	375.854	865.986	458.13	285.559	849.51	450.774
317	3.16	556.825	1265.99	252.656	610.38	1252.7	187.321	595.04	1256.71	321.798	702.503	1129.13	120.978	695.71	1126.97	398.734	618.187	1066.5	258.005	700.21	808.765	28.808	448.567	856.698	19.2768	453.548	856.65	87.9412	375.417	865.189	54.0225	285.552	847.04	73.4424	702.763	820.846	487.285	446.417	849.252	499.427	452.359	859.876	427.867	375.844	865.988	458.123	285.529	849.51	450.749
318	3.17	556.797	1265.99	252.635	610.401	1252.71	187.315	594.999	1256.75	321.787	702.529	1129.17	120.964	695.727	1126.99	398.723	618.136	1066.59	257.976	700.22	808.768	28.7999	448.564	856.712	19.2597	453.529	856.67	87.9338	375.409	865.203	53.9928	285.539	847.062	73.4201	702.801	820.886	487.32	446.397	849.277	499.425	452.321	859.925	427.867	375.804	865.998	458.106	285.514	849.53	450.727
319	3.18	556.795	1265.99	252.636	610.429	1252.71	187.322	594.951	1256.76	321.8	702.517	1129.19	120.973	695.718	1127.01	398.721	618.094	1066.65	257.981	700.239	808.779	28.7944	448.562	856.724	19.2608	453.533	856.694	87.9597	375.365	865.223	53.9945	285.526	847.042	73.4012	702.788	820.919	487.348	446.376	849.3	499.439	452.255	860.004	427.87	375.777	866.017	458.096	285.514	849.553	450.725
320	3.19	556.843	1265.95	252.648	610.447	1252.66	187.337	594.964	1256.75	321.817	702.513	1129.22	120.963	695.683	1127.03	398.724	618.09	1066.67	257.995	700.233	808.813	28.7841	448.56	856.71	19.2663	453.554	856.7	87.9567	375.328	865.247	54.0132	285.494	847.034	73.3947	702.776	820.957	487.348	446.353	849.307	499.455	452.158	860.058	427.89	375.765	866.025	458.076	285.471	849.567	450.727
321	3.2	556.871	1265.91	252.642	610.491	1252.62	187.313	595.025	1256.71	321.79	702.532	1129.23	120.949	695.677	1127.04	398.705	618.161	1066.67	257.971	700.238	808.824	28.7812	448.542	856.684	19.2853	453.573	856.657	87.9302	375.348	865.237	53.9907	285.484	847.013	73.3738	702.846	821.018	487.36	446.316	849.31	499.45	452.112	860.08	427.882	375.745	866.014	458.044	285.451	849.567	450.706
322	3.21	556.902	1265.87	252.618	610.492	1252.6	187.306	595.149	1256.66	321.752	702.529	1129.21	120.934	695.687	1127.04	398.675	618.205	1066.69	257.951	700.229	808.833	28.7771	448.594	856.66	19.251	453.585	856.636	87.9116	375.377	865.227	53.9573	285.508	846.976	73.3328	702.875	821.087	487.357	446.308	849.309	499.438	452.13	860.056	427.865	375.744	866.006	458.02	285.461	849.561	450.678
323	3.22	556.909	1265.85	252.644	610.479	1252.59	187.346	595.209	1256.65	321.792	702.528	1129.23	120.945	695.721	1127.03	398.68	618.213	1066.73	257.978	700.242	808.851	28.7613	448.602	856.668	19.2551	453.582	856.646	87.945	375.341	865.235	53.981	285.485	846.984	73.3694	702.814	821.062	487.339	446.332	849.299	499.454	452.191	860.027	427.891	375.764	865.999	458.032	285.499	849.552	450.695
324	3.23	556.9	1265.87	252.679	610.449	1252.6	187.343	595.198	1256.68	321.809	702.599	1129.23	120.952	695.744	1127.04	398.713	618.155	1066.82	258.017	700.234	808.837	28.7289	448.588	856.686	19.284	453.563	856.677	87.9984	375.327	865.245	53.982	285.502	847.008	73.3798	702.83	821.006	487.366	446.371	849.284	499.491	452.258	859.985	427.934	375.799	865.996	458.052	285.547	849.553	450.713
325	3.24	556.896	1265.92	252.663	610.511	1252.59	187.324	595.134	1256.71	321.812	702.622	1129.23	120.943	695.788	1127.05	398.692	618.059	1066.89	257.992	700.248	808.844	28.7177	448.54	856.715	19.2999	453.534	856.722	88.0099	375.37	865.26	53.9362	285.53	847.011	73.3345	702.868	820.969	487.38	446.394	849.269	499.487	452.299	859.939	427.92	375.804	865.991	458.035	285.584	849.557	450.689
326	3.25	556.888	1265.95	252.618	610.571	1252.58	187.302	595.087	1256.74	321.788	702.598	1129.25	120.913	695.827	1127.05	398.639	617.933	1066.94	257.949	700.212	808.853	28.7067	448.551	856.737	19.2542	453.55	856.738	87.9692	375.403	865.268	53.8747	285.499	847.044	73.2876	702.869	820.951	487.379	446.427	849.268	499.467	452.349	859.893	427.891	375.804	865.986	458.009	285.635	849.542	450.658
327	3.26	556.87	1265.98	252.609	610.572	1252.61	187.287	595.112	1256.76	321.786	702.598	1129.27	120.898	695.797	1127.08	398.635	617.835	1066.93	257.95	700.153	808.846	28.689	448.558	856.729	19.2237	453.574	856.75	87.9359	375.41	865.277	53.8326	285.465	847.052	73.2452	702.842	820.954	487.376	446.453	849.274	499.462	452.404	859.86	427.877	375.799	865.99	458	285.652	849.546	450.657
328	3.27	556.909	1266	252.629	610.544	1252.62	187.319	595.127	1256.78	321.817	702.536	1129.27	120.912	695.778	1127.11	398.647	617.765	1066.93	257.988	700.15	808.884	28.6785	448.553	856.712	19.2188	453.553	856.761	87.9483	375.403	865.28	53.8206	285.462	847.038	73.2442	702.815	820.962	487.36	446.447	849.282	499.471	452.358	859.894	427.897	375.8	866.008	458.007	285.636	849.569	450.654
329	3.28	556.953	1266	252.662	610.535	1252.63	187.362	595.118	1256.78	321.847	702.471	1129.3	120.935	695.736	1127.14	398.66	617.699	1066.96	258.02	700.138	808.909	28.6614	448.551	856.699	19.2619	453.481	856.779	88.0121	375.406	865.269	53.8138	285.391	847.026	73.2511	702.757	820.977	487.343	446.403	849.281	499.476	452.315	859.927	427.907	375.772	866.021	458.001	285.603	849.584	450.662
330	3.29	556.958	1265.98	252.677	610.547	1252.59	187.352	595.104	1256.74	321.855	702.401	1129.31	120.92	695.675	1127.14	398.626	617.66	1066.94	258.038	700.078	808.934	28.6358	448.535	856.657	19.2775	453.465	856.769	88.0283	375.373	865.251	53.7946	285.347	846.991	73.2087	702.731	821	487.356	446.334	849.292	499.467	452.315	859.939	427.91	375.72	866.018	457.971	285.555	849.579	450.659
331	3.3	556.992	1265.95	252.687	610.504	1252.56	187.358	595.206	1256.7	321.839	702.324	1129.33	120.904	695.616	1127.15	398.622	617.671	1066.9	258.055	699.996	808.957	28.5915	448.534	856.61	19.2852	453.512	856.723	88.0109	375.371	865.219	53.7847	285.326	846.93	73.1781	702.726	821.059	487.355	446.288	849.297	499.465	452.268	859.956	427.935	375.705	866.007	457.958	285.507	849.572	450.656
332	3.31	557.026	1265.94	252.678	610.555	1252.56	187.35	595.246	1256.69	321.857	702.307	1129.37	120.922	695.623	1127.17	398.633	617.682	1066.88	258.041	699.953	808.963	28.5674	448.581	856.6	19.2892	453.539	856.702	88.0139	375.404	865.206	53.7595	285.343	846.884	73.1565	702.701	821.065	487.352	446.28	849.313	499.472	452.204	859.99	427.953	375.697	866.009	457.947	285.477	849.563	450.652
333	3.32	557.003	1265.98	252.681	610.565	1252.59	187.36	595.254	1256.71	321.856	702.317	1129.41	120.939	695.621	1127.2	398.634	617.618	1066.92	258.003	699.967	808.99	28.5721	448.615	856.611	19.2585	453.483	856.744	88.0306	375.386	865.221	53.7658	285.309	846.888	73.1473	702.716	821.056	487.341	446.306	849.324	499.46	452.162	859.992	427.931	375.673	866.019	457.923	285.463	849.551	450.647
334	3.33	556.958	1266.06	252.669	610.542	1252.64	187.341	595.208	1256.74	321.843	702.325	1129.44	120.93	695.607	1127.2	398.603	617.513	1067.01	257.981	699.986	809.015	28.5698	448.56	856.649	19.2427	453.453	856.806	88.0299	375.344	865.256	53.75	285.303	846.926	73.1229	702.762	821.061	487.352	446.344	849.316	499.457	452.161	859.976	427.882	375.659	866.018	457.915	285.486	849.557	450.64
335	3.34	556.972	1266.11	252.655	610.548	1252.69	187.335	595.203	1256.75	321.841	702.354	1129.46	120.912	695.633	1127.19	398.604	617.448	1067.11	257.962	699.971	809.009	28.5587	448.556	856.698	19.2321	453.46	856.848	88.0131	375.345	865.283	53.7336	285.307	846.957	73.0919	702.73	821.027	487.364	446.389	849.304	499.457	452.234	859.96	427.888	375.685	866.002	457.918	285.535	849.569	450.642
336	3.35	556.993	1266.14	252.655	610.597	1252.72	187.328	595.196	1256.8	321.862	702.36	1129.48	120.902	695.649	1127.17	398.622	617.446	1067.16	257.948	700.005	809.023	28.5722	448.531	856.744	19.2337	453.499	856.888	87.9951	375.349	865.285	53.7244	285.309	846.976	73.0754	702.764	821.02	487.39	446.415	849.287	499.454	452.323	859.918	427.91	375.729	865.999	457.925	285.604	849.564	450.649
337	3.36	556.973	1266.18	252.683	610.602	1252.75	187.371	595.167	1256.83	321.873	702.351	1129.47	120.913	695.657	1127.16	398.632	617.381	1067.19	257.961	700.026	809.039	28.5711	448.467	856.764	19.2923	453.505	856.943	88.033	375.341	865.291	53.7421	285.299	846.987	73.0828	702.839	821.018	487.395	446.42	849.252	499.45	452.337	859.866	427.908	375.732	865.991	457.926	285.635	849.553	450.667
338	3.37	556.95	1266.18	252.738	610.569	1252.76	187.426	595.181	1256.8	321.905	702.323	1129.44	120.949	695.659	1127.14	398.655	617.324	1067.22	257.986	700.014	809.02	28.5739	448.416	856.762	19.3357	453.458	856.992	88.0994	375.312	865.299	53.7687	285.259	847	73.111	702.877	821.026	487.398	446.398	849.228	499.457	452.353	859.826	427.911	375.742	865.986	457.93	285.63	849.558	450.697
339	3.38	556.987	1266.15	252.776	610.548	1252.76	187.45	595.171	1256.77	321.959	702.311	1129.43	120.968	695.651	1127.13	398.685	617.35	1067.19	258.017	700	809.03	28.5715	448.451	856.749	19.3382	453.417	856.998	88.1431	375.324	865.283	53.7792	285.228	846.976	73.1139	702.793	821.002	487.392	446.408	849.23	499.474	452.389	859.814	427.937	375.75	865.997	457.948	285.614	849.549	450.717
340	3.39	557.043	1266.1	252.813	610.556	1252.7	187.465	595.229	1256.73	321.96	702.296	1129.46	120.967	695.649	1127.12	398.681	617.382	1067.16	258.02	699.939	809.046	28.5324	448.468	856.714	19.3284	453.479	856.92	88.1127	375.321	865.267	53.7777	285.225	846.951	73.0843	702.777	821.023	487.387	446.388	849.237	499.469	452.294	859.866	427.927	375.734	865.998	457.936	285.582	849.537	450.698
341	3.4	557.022	1266.09	252.831	610.558	1252.68	187.497	595.217	1256.71	321.958	702.267	1129.49	120.971	695.616	1127.14	398.673	617.371	1067.15	258.011	699.929	809.099	28.5249	448.52	856.692	19.2909	453.49	856.875	88.1085	375.295	865.272	53.7882	285.218	846.945	73.0699	702.795	821.067	487.402	446.325	849.27	499.459	452.144	859.93	427.894	375.679	865.999	457.901	285.537	849.546	450.675
342	3.41	556.986	1266.11	252.848	610.571	1252.66	187.509	595.193	1256.71	321.967	702.236	1129.51	120.975	695.572	1127.16	398.66	617.334	1067.17	257.998	699.922	809.139	28.536	448.537	856.726	19.2775	453.478	856.864	88.0886	375.279	865.287	53.7621	285.211	846.95	73.0589	702.758	821.077	487.395	446.298	849.302	499.439	452.067	859.981	427.863	375.627	866.011	457.869	285.489	849.562	450.668
343	3.42	557.009	1266.11	252.874	610.578	1252.65	187.49	595.178	1256.73	322	702.254	1129.56	120.949	695.562	1127.17	398.629	617.319	1067.2	257.971	699.878	809.143	28.5054	448.502	856.755	19.288	453.46	856.854	88.0798	375.282	865.277	53.7528	285.202	846.955	73.0329	702.698	821.051	487.355	446.325	849.319	499.419	452.103	859.993	427.849	375.61	866.016	457.847	285.492	849.573	450.661
344	3.43	557.034	1266.13	252.897	610.56	1252.67	187.496	595.236	1256.72	322.017	702.261	1129.59	120.934	695.585	1127.18	398.614	617.298	1067.24	257.965	699.842	809.148	28.4835	448.498	856.769	19.3182	453.457	856.853	88.0916	375.286	865.259	53.7583	285.218	846.955	73.0229	702.739	821.068	487.357	446.345	849.323	499.406	452.188	859.937	427.823	375.62	866.022	457.842	285.498	849.579	450.651
345	3.44	556.995	1266.16	252.954	610.561	1252.7	187.54	595.061	1256.75	322.077	702.248	1129.6	120.964	695.592	1127.18	398.627	617.282	1067.26	257.999	699.868	809.157	28.496	448.487	856.774	19.3349	453.408	856.895	88.1326	375.288	865.249	53.7837	285.228	846.95	73.0545	702.755	821.053	487.372	446.343	849.31	499.409	452.165	859.914	427.823	375.631	866.027	457.855	285.511	849.566	450.674
346	3.45	556.948	1266.19	253.03	610.543	1252.74	187.594	595.004	1256.75	322.134	702.269	1129.59	120.991	695.595	1127.18	398.674	617.255	1067.32	258.021	699.877	809.146	28.5089	448.423	856.793	19.3992	453.376	856.922	88.1912	375.255	865.255	53.8123	285.227	846.926	73.0809	702.747	820.986	487.362	446.343	849.291	499.425	452.25	859.887	427.867	375.657	866.024	457.873	285.536	849.555	450.717
347	3.46	556.945	1266.21	253.089	610.56	1252.75	187.625	595.1	1256.73	322.195	702.288	1129.6	121	695.604	1127.17	398.684	617.241	1067.38	258.032	699.846	809.153	28.4992	448.4	856.788	19.4264	453.35	856.92	88.2129	375.278	865.238	53.8192	285.206	846.939	73.0733	702.766	820.946	487.362	446.371	849.268	499.436	452.393	859.822	427.881	375.691	865.999	457.879	285.576	849.545	450.742
348	3.47	556.957	1266.23	253.124	610.567	1252.77	187.62	595.178	1256.71	322.19	702.291	1129.62	121.001	695.606	1127.15	398.67	617.241	1067.43	258.005	699.811	809.163	28.4933	448.411	856.793	19.4265	453.352	856.88	88.1782	375.275	865.226	53.8356	285.214	846.928	73.0672	702.735	820.947	487.334	446.408	849.252	499.424	452.444	859.779	427.872	375.695	865.986	457.867	285.591	849.526	450.733
349	3.48	556.942	1266.27	253.146	610.548	1252.8	187.643	595.15	1256.73	322.186	702.308	1129.66	121.008	695.639	1127.17	398.669	617.199	1067.51	257.966	699.802	809.175	28.4963	448.441	856.812	19.421	453.389	856.861	88.1679	375.232	865.245	53.8653	285.223	846.939	73.0724	702.799	820.973	487.341	446.405	849.261	499.406	452.442	859.808	427.881	375.668	865.992	457.841	285.579	849.522	450.722
350	3.49	556.924	1266.31	253.165	610.562	1252.83	187.691	595.103	1256.74	322.197	702.298	1129.72	121.04	695.627	1127.2	398.653	617.185	1067.59	257.935	699.854	809.229	28.5229	448.445	856.838	19.4199	453.359	856.872	88.2085	375.201	865.265	53.8939	285.22	846.967	73.091	702.805	821.001	487.361	446.393	849.295	499.405	452.268	859.882	427.862	375.656	866.008	457.824	285.558	849.537	450.72
351	3.5	556.934	1266.33	253.197	610.579	1252.89	187.724	595.14	1256.74	322.211	702.328	1129.78	121.052	695.591	1127.23	398.643	617.191	1067.63	257.927	699.88	809.299	28.5564	448.449	856.876	19.4388	453.374	856.902	88.22	375.183	865.284	53.9062	285.231	846.981	73.0946	702.765	821.022	487.371	446.378	849.318	499.412	452.163	859.93	427.838	375.629	866.02	457.825	285.526	849.559	450.719
352	3.51	556.982	1266.34	253.242	610.583	1252.93	187.743	595.186	1256.73	322.237	702.298	1129.81	121.057	695.579	1127.23	398.632	617.225	1067.61	257.925	699.888	809.352	28.5718	448.463	856.887	19.4496	453.387	856.864	88.2254	375.199	865.274	53.9377	285.253	846.95	73.0895	702.786	821.087	487.387	446.35	849.316	499.41	452.106	859.973	427.858	375.584	866.013	457.81	285.505	849.555	450.722
353	3.52	557.035	1266.32	253.298	610.578	1252.95	187.803	595.159	1256.7	322.306	702.268	1129.84	121.081	695.586	1127.22	398.625	617.233	1067.57	257.948	699.92	809.388	28.5749	448.427	856.877	19.5005	453.364	856.842	88.2774	375.206	865.259	53.9802	285.243	846.935	73.1108	702.814	821.115	487.373	446.343	849.301	499.4	452.092	859.979	427.859	375.582	866.011	457.791	285.484	849.542	450.734
354	3.53	557.024	1266.34	253.388	610.526	1253	187.903	595.07	1256.69	322.4	702.26	1129.85	121.12	695.558	1127.22	398.655	617.211	1067.58	257.991	699.924	809.411	28.5842	448.413	856.888	19.5752	453.329	856.864	88.3492	375.207	865.241	54.0487	285.223	846.917	73.1506	702.84	821.148	487.382	446.343	849.283	499.398	452.126	859.967	427.879	375.595	866.014	457.808	285.464	849.534	450.77
355	3.54	557.033	1266.36	253.473	610.528	1253.07	187.968	595.075	1256.65	322.475	702.239	1129.83	121.137	695.532	1127.21	398.686	617.195	1067.59	258.022	699.916	809.422	28.6019	448.386	856.871	19.6314	453.277	856.875	88.4079	375.189	865.222	54.0892	285.197	846.917	73.1718	702.833	821.148	487.408	446.349	849.27	499.409	452.194	859.945	427.881	375.616	866.006	457.82	285.464	849.515	450.819
356	3.55	557.1	1266.37	253.522	610.528	1253.11	188.008	595.119	1256.63	322.516	702.234	1129.82	121.149	695.53	1127.21	398.704	617.23	1067.56	258.011	699.895	809.405	28.5964	448.393	856.871	19.644	453.265	856.852	88.4324	375.166	865.217	54.114	285.176	846.907	73.1744	702.772	821.09	487.383	446.344	849.254	499.405	452.251	859.94	427.917	375.621	865.999	457.817	285.481	849.497	450.829
357	3.56	557.124	1266.42	253.52	610.526	1253.13	188.027	595.076	1256.67	322.526	702.213	1129.85	121.166	695.514	1127.22	398.695	617.211	1067.57	257.971	699.931	809.433	28.614	448.475	856.854	19.598	453.339	856.817	88.3804	375.164	865.216	54.0995	285.166	846.921	73.1537	702.752	821.065	487.365	446.356	849.265	499.394	452.266	859.932	427.895	375.616	866.002	457.805	285.472	849.487	450.816
358	3.57	557.08	1266.5	253.493	610.528	1253.2	188.033	595.018	1256.72	322.522	702.211	1129.87	121.166	695.49	1127.22	398.669	617.159	1067.61	257.93	699.961	809.461	28.6387	448.481	856.879	19.5877	453.375	856.815	88.3461	375.163	865.222	54.0877	285.174	846.936	73.125	702.775	821.051	487.384	446.381	849.269	499.384	452.204	859.924	427.847	375.596	865.992	457.794	285.46	849.471	450.799
359	3.58	557.005	1266.62	253.514	610.538	1253.28	188.067	594.941	1256.75	322.533	702.215	1129.91	121.137	695.446	1127.24	398.669	617.082	1067.69	257.925	699.941	809.415	28.6311	448.436	856.933	19.5902	453.315	856.857	88.3574	375.128	865.272	54.0812	285.182	846.958	73.1054	702.728	821.001	487.381	446.407	849.29	499.38	452.181	859.899	427.843	375.584	865.993	457.791	285.453	849.482	450.817
360	3.59	556.962	1266.71	253.554	610.593	1253.36	188.074	594.891	1256.77	322.532	702.218	1129.93	121.123	695.439	1127.26	398.679	617.038	1067.74	257.912	699.933	809.395	28.6171	448.381	856.976	19.6224	453.287	856.883	88.3578	375.135	865.276	54.0897	285.178	846.977	73.1057	702.73	820.991	487.362	446.408	849.301	499.374	452.25	859.874	427.823	375.61	866.004	457.786	285.454	849.503	450.829
361	3.6	556.983	1266.73	253.596	610.627	1253.4	188.116	594.917	1256.8	322.558	702.178	1129.95	121.144	695.396	1127.26	398.687	617.06	1067.73	257.912	699.922	809.406	28.6192	448.391	857.002	19.6547	453.303	856.874	88.3914	375.127	865.264	54.1229	285.229	846.956	73.1069	702.759	820.998	487.36	446.395	849.295	499.366	452.293	859.885	427.795	375.622	866.023	457.777	285.457	849.516	450.828
362	3.61	557.018	1266.72	253.668	610.585	1253.41	188.18	594.873	1256.77	322.646	702.086	1129.96	121.194	695.363	1127.26	398.694	617.033	1067.72	257.949	699.897	809.423	28.6298	448.344	856.997	19.7135	453.289	856.863	88.4671	375.111	865.251	54.1706	285.217	846.955	73.1521	702.744	821.02	487.359	446.349	849.299	499.372	452.222	859.912	427.808	375.595	866.024	457.799	285.432	849.529	450.857
363	3.62	557.056	1266.68	253.745	610.569	1253.38	188.224	594.86	1256.71	322.704	702.016	1130	121.231	695.356	1127.25	398.718	617.034	1067.67	257.989	699.91	809.466	28.6231	448.366	856.939	19.7411	453.248	856.844	88.549	375.111	865.211	54.24	285.172	846.948	73.1909	702.68	821.027	487.371	446.328	849.287	499.386	452.191	859.911	427.866	375.566	866.014	457.82	285.413	849.511	450.888
364	3.63	557.177	1266.6	253.784	610.582	1253.36	188.227	594.958	1256.66	322.771	701.994	1130.06	121.245	695.332	1127.23	398.709	617.123	1067.58	258.013	699.955	809.539	28.6471	448.458	856.891	19.7403	453.26	856.758	88.5774	375.163	865.151	54.2578	285.235	846.882	73.1815	702.676	821.031	487.371	446.317	849.264	499.403	452.186	859.921	427.889	375.548	865.993	457.812	285.4	849.477	450.884
365	3.64	557.263	1266.56	253.779	610.628	1253.34	188.237	595.119	1256.62	322.776	701.959	1130.1	121.264	695.341	1127.23	398.679	617.173	1067.51	257.998	699.996	809.597	28.6785	448.475	856.878	19.7681	453.307	856.673	88.5365	375.196	865.136	54.2414	285.276	846.85	73.1771	702.701	821.088	487.361	446.306	849.258	499.397	452.125	859.952	427.871	375.53	865.987	457.794	285.401	849.443	450.863
366	3.65	557.232	1266.61	253.808	610.621	1253.36	188.278	595.166	1256.64	322.775	701.954	1130.15	121.295	695.347	1127.25	398.675	617.12	1067.53	257.981	700.02	809.62	28.6735	448.476	856.888	19.7742	453.329	856.672	88.5147	375.197	865.153	54.2743	285.26	846.874	73.1936	702.74	821.104	487.367	446.305	849.266	499.399	452.159	859.941	427.857	375.541	865.981	457.792	285.392	849.437	450.861
367	3.66	557.152	1266.69	253.857	610.635	1253.42	188.31	595.035	1256.69	322.794	701.937	1130.19	121.322	695.339	1127.26	398.698	617.078	1067.6	257.979	700.033	809.636	28.6934	448.462	856.942	19.7764	453.311	856.738	88.5523	375.144	865.197	54.3096	285.242	846.921	73.1987	702.752	821.089	487.385	446.323	849.27	499.408	452.172	859.947	427.841	375.545	865.992	457.812	285.399	849.465	450.889
368	3.67	557.144	1266.74	253.888	610.642	1253.47	188.332	595.008	1256.73	322.797	701.925	1130.22	121.331	695.364	1127.26	398.696	617.052	1067.68	257.995	700.038	809.648	28.7052	448.439	856.984	19.7876	453.303	856.806	88.5762	375.111	865.224	54.3168	285.26	846.948	73.1977	702.735	821.074	487.384	446.365	849.265	499.405	452.189	859.931	427.851	375.572	866.004	457.814	285.415	849.488	450.908
369	3.68	557.131	1266.79	253.889	610.665	1253.5	188.323	595.049	1256.74	322.799	701.904	1130.21	121.313	695.364	1127.26	398.706	617.077	1067.71	257.986	700.017	809.629	28.6872	448.436	856.992	19.7866	453.303	856.851	88.5527	375.128	865.228	54.3036	285.229	846.969	73.1847	702.748	821.076	487.391	446.366	849.25	499.397	452.241	859.918	427.844	375.578	866.008	457.811	285.422	849.485	450.909
370	3.69	557.103	1266.83	253.927	610.674	1253.5	188.351	595.015	1256.75	322.843	701.934	1130.21	121.304	695.361	1127.26	398.721	617.082	1067.75	258.016	700.023	809.639	28.7243	448.365	856.991	19.8153	453.281	856.889	88.5997	375.128	865.227	54.3163	285.211	846.992	73.2089	702.742	821.061	487.396	446.363	849.248	499.405	452.272	859.884	427.851	375.584	866.014	457.821	285.442	849.484	450.949
371	3.7	557.119	1266.86	253.986	610.609	1253.53	188.413	594.997	1256.76	322.882	701.965	1130.22	121.32	695.385	1127.25	398.755	617.101	1067.78	258.045	700.064	809.654	28.7686	448.303	856.99	19.8587	453.263	856.918	88.6454	375.088	865.232	54.3614	285.212	847.005	73.2395	702.729	821.045	487.403	446.362	849.247	499.416	452.286	859.868	427.842	375.6	866.008	457.847	285.465	849.481	450.979
372	3.71	557.146	1266.86	254.019	610.624	1253.53	188.431	595.03	1256.74	322.909	701.936	1130.21	121.328	695.38	1127.25	398.78	617.14	1067.75	258.046	700.094	809.66	28.775	448.325	856.995	19.8779	453.267	856.882	88.6425	375.093	865.214	54.3816	285.188	846.995	73.2424	702.707	821.015	487.402	446.358	849.242	499.421	452.286	859.864	427.871	375.604	866.012	457.855	285.458	849.477	450.987
373	3.72	557.171	1266.84	254.002	610.634	1253.52	188.449	595.039	1256.73	322.901	701.948	1130.2	121.321	695.375	1127.25	398.746	617.141	1067.73	258.012	700.093	809.654	28.7814	448.336	856.978	19.8399	453.301	856.813	88.6117	375.09	865.209	54.3541	285.186	846.959	73.2177	702.737	821.045	487.413	446.338	849.251	499.407	452.24	859.859	427.867	375.567	866.015	457.83	285.414	849.467	450.972
374	3.73	557.203	1266.82	253.985	610.641	1253.53	188.45	595.026	1256.72	322.883	701.909	1130.2	121.312	695.333	1127.25	398.721	617.1	1067.72	257.972	700.068	809.637	28.7825	448.363	856.968	19.8125	453.267	856.777	88.5886	375.112	865.196	54.3359	285.189	846.951	73.1981	702.737	821.082	487.406	446.323	849.268	499.408	452.144	859.902	427.831	375.517	866.003	457.801	285.36	849.451	450.956
375	3.74	557.236	1266.82	253.983	610.706	1253.54	188.441	595.048	1256.72	322.875	701.904	1130.19	121.3	695.335	1127.27	398.708	617.104	1067.72	257.959	700.039	809.62	28.7919	448.41	856.961	19.8192	453.252	856.77	88.5944	375.135	865.177	54.3196	285.19	846.951	73.1855	702.691	821.076	487.386	446.303	849.281	499.411	452.084	859.944	427.831	375.476	866.005	457.797	285.343	849.448	450.958
376	3.75	557.288	1266.81	254.007	610.697	1253.53	188.458	595.077	1256.72	322.885	701.934	1130.18	121.275	695.354	1127.28	398.709	617.125	1067.71	257.968	700.081	809.625	28.806	448.471	856.939	19.8101	453.282	856.737	88.5957	375.14	865.16	54.3367	285.203	846.942	73.1777	702.68	821.079	487.383	446.301	849.289	499.413	452.057	859.971	427.849	375.492	866.014	457.811	285.323	849.462	450.967
377	3.76	557.348	1266.8	254.018	610.697	1253.53	188.475	595.199	1256.67	322.892	701.919	1130.16	121.268	695.324	1127.26	398.693	617.157	1067.69	257.976	700.069	809.602	28.8224	448.458	856.947	19.8316	453.258	856.716	88.5935	375.113	865.15	54.3497	285.201	846.911	73.1774	702.648	821.089	487.382	446.291	849.282	499.42	452.062	859.992	427.84	375.492	866.006	457.808	285.321	849.461	450.975
378	3.77	557.392	1266.8	254.048	610.727	1253.52	188.493	595.228	1256.66	322.912	701.857	1130.13	121.285	695.313	1127.24	398.687	617.189	1067.67	258.003	700.073	809.587	28.8609	448.448	856.939	19.8628	453.3	856.714	88.6254	375.149	865.119	54.3547	285.21	846.887	73.168	702.672	821.119	487.387	446.286	849.268	499.428	452.129	859.968	427.861	375.523	866.001	457.82	285.338	849.452	450.998
379	3.78	557.398	1266.85	254.097	610.789	1253.53	188.485	595.117	1256.7	322.951	701.853	1130.11	121.287	695.292	1127.27	398.7	617.164	1067.71	258.029	700.082	809.561	28.9154	448.442	856.937	19.91	453.306	856.749	88.6869	375.143	865.122	54.3744	285.25	846.897	73.2026	702.644	821.103	487.372	446.301	849.242	499.441	452.187	859.93	427.904	375.582	866.008	457.855	285.356	849.447	451.033
380	3.79	557.326	1266.93	254.12	610.763	1253.58	188.52	595.101	1256.72	322.985	701.879	1130.11	121.305	695.267	1127.32	398.708	617.039	1067.82	258.035	700.089	809.556	28.9601	448.4	856.959	19.9389	453.276	856.854	88.6991	375.127	865.131	54.394	285.244	846.948	73.2301	702.613	821.056	487.373	446.319	849.225	499.452	452.19	859.9	427.904	375.585	866.007	457.873	285.368	849.463	451.059
381	3.8	557.294	1266.99	254.101	610.752	1253.61	188.506	595.128	1256.74	322.96	701.929	1130.13	121.274	695.243	1127.34	398.677	616.975	1067.88	257.999	700.1	809.538	28.9961	448.354	856.998	19.9555	453.225	856.907	88.684	375.086	865.155	54.3956	285.203	846.972	73.1997	702.6	821.029	487.367	446.355	849.219	499.446	452.173	859.897	427.895	375.556	866.004	457.871	285.366	849.483	451.06
382	3.81	557.304	1267.03	254.042	610.769	1253.64	188.485	595.214	1256.75	322.879	701.961	1130.17	121.266	695.262	1127.34	398.629	616.96	1067.91	257.937	700.072	809.514	29.0291	448.378	857.006	19.9303	453.205	856.879	88.6783	375.078	865.179	54.3549	285.2	846.949	73.1655	702.629	821.04	487.378	446.364	849.232	499.444	452.174	859.914	427.875	375.543	866.003	457.856	285.395	849.461	451.051
383	3.82	557.334	1267.03	253.986	610.838	1253.67	188.475	595.244	1256.77	322.836	701.944	1130.21	121.262	695.279	1127.35	398.599	616.985	1067.91	257.89	700.143	809.524	29.0868	448.401	857.021	19.9067	453.221	856.826	88.6581	375.095	865.192	54.3433	285.197	846.927	73.1498	702.63	821.047	487.387	446.373	849.247	499.424	452.212	859.902	427.875	375.536	865.994	457.835	285.399	849.422	451.023
384	3.83	557.381	1267.01	253.958	610.858	1253.7	188.441	595.29	1256.76	322.812	701.972	1130.24	121.244	695.234	1127.34	398.573	616.989	1067.9	257.876	700.233	809.569	29.1456	448.426	857.031	19.9014	453.25	856.772	88.6473	375.096	865.202	54.3679	285.194	846.931	73.1436	702.638	821.082	487.401	446.389	849.255	499.407	452.182	859.912	427.875	375.53	865.978	457.832	285.367	849.395	451.003
385	3.84	557.441	1266.99	253.94	610.823	1253.71	188.417	595.397	1256.73	322.79	701.957	1130.26	121.223	695.212	1127.32	398.557	617.017	1067.86	257.846	700.252	809.612	29.1618	448.445	857.01	19.8703	453.222	856.75	88.6296	375.065	865.193	54.3812	285.213	846.926	73.1267	702.639	821.126	487.4	446.379	849.25	499.418	452.161	859.943	427.873	375.494	865.963	457.835	285.325	849.381	450.989
386	3.85	557.469	1267	253.918	610.841	1253.7	188.408	595.42	1256.69	322.79	701.923	1130.27	121.198	695.172	1127.33	398.551	617.058	1067.83	257.833	700.216	809.609	29.1675	448.453	856.981	19.8755	453.22	856.742	88.6261	375.087	865.169	54.3892	285.203	846.898	73.14	702.628	821.193	487.392	446.356	849.247	499.424	452.045	859.971	427.898	375.471	865.963	457.822	285.292	849.381	450.986
387	3.86	557.438	1267.05	253.921	610.873	1253.73	188.414	595.308	1256.72	322.8	701.888	1130.28	121.205	695.14	1127.36	398.558	617.04	1067.88	257.847	700.2	809.614	29.1857	448.402	856.975	19.9058	453.257	856.76	88.6743	375.073	865.164	54.426	285.193	846.903	73.1891	702.638	821.228	487.407	446.32	849.248	499.427	452	859.984	427.897	375.475	865.982	457.832	285.274	849.401	451.012
388	3.87	557.363	1267.14	253.953	610.853	1253.75	188.442	595.125	1256.78	322.838	701.87	1130.29	121.225	695.076	1127.38	398.589	616.973	1067.94	257.887	700.206	809.621	29.1863	448.338	856.991	19.9646	453.249	856.868	88.7367	375.048	865.174	54.4617	285.139	846.961	73.2445	702.579	821.19	487.42	446.27	849.245	499.44	452.007	859.996	427.902	375.471	866.008	457.863	285.264	849.45	451.058
389	3.88	557.324	1267.2	253.953	610.814	1253.79	188.447	595.15	1256.8	322.826	701.851	1130.28	121.231	695.073	1127.41	398.605	616.886	1067.99	257.919	700.242	809.645	29.1754	448.307	857.008	19.9934	453.224	856.922	88.7517	375.014	865.168	54.4734	285.131	846.985	73.2535	702.562	821.172	487.415	446.257	849.248	499.438	452.026	860	427.901	375.484	866.035	457.881	285.255	849.484	451.09
390	3.89	557.386	1267.2	253.911	610.833	1253.83	188.416	595.229	1256.81	322.782	701.853	1130.27	121.218	695.085	1127.41	398.605	616.862	1067.97	257.887	700.218	809.629	29.1575	448.331	857.017	19.9684	453.182	856.907	88.7309	375.009	865.168	54.4504	285.16	846.975	73.2313	702.559	821.151	487.411	446.27	849.24	499.439	452.046	859.994	427.868	375.497	866.025	457.878	285.262	849.47	451.082
391	3.9	557.483	1267.2	253.85	610.903	1253.84	188.348	595.347	1256.8	322.72	701.832	1130.26	121.172	695.092	1127.37	398.565	616.867	1067.95	257.848	700.204	809.605	29.1736	448.385	857.008	19.9468	453.197	856.876	88.687	375.039	865.168	54.4224	285.177	846.94	73.1985	702.551	821.109	487.4	446.313	849.227	499.433	452.131	859.931	427.859	375.514	866.001	457.861	285.299	849.433	451.064
392	3.91	557.523	1267.2	253.816	610.92	1253.83	188.329	595.41	1256.81	322.692	701.861	1130.25	121.16	695.087	1127.35	398.542	616.929	1067.95	257.82	700.242	809.589	29.1861	448.41	857	19.9434	453.187	856.864	88.6812	375.063	865.169	54.414	285.202	846.932	73.1776	702.574	821.099	487.392	446.337	849.231	499.428	452.206	859.881	427.879	375.525	865.983	457.856	285.329	849.404	451.064
393	3.92	557.562	1267.2	253.802	610.915	1253.83	188.323	595.434	1256.82	322.685	701.876	1130.25	121.162	695.052	1127.35	398.521	616.947	1067.96	257.797	700.201	809.556	29.1817	448.405	856.993	19.9209	453.149	856.854	88.6701	375.088	865.146	54.4019	285.204	846.928	73.1626	702.581	821.115	487.375	446.354	849.232	499.442	452.131	859.9	427.885	375.509	865.973	457.862	285.326	849.376	451.065
394	3.93	557.531	1267.24	253.786	610.915	1253.85	188.321	595.439	1256.84	322.651	701.852	1130.23	121.148	695.047	1127.34	398.479	616.894	1067.95	257.778	700.155	809.541	29.1767	448.425	856.961	19.8926	453.192	856.803	88.6362	375.082	865.131	54.3819	285.207	846.927	73.1481	702.573	821.096	487.381	446.347	849.227	499.444	452.115	859.902	427.895	375.493	865.964	457.853	285.29	849.362	451.05
395	3.94	557.481	1267.28	253.771	610.909	1253.86	188.32	595.385	1256.84	322.649	701.832	1130.23	121.119	695.015	1127.34	398.458	616.813	1067.95	257.765	700.108	809.518	29.1595	448.417	856.938	19.8714	453.228	856.803	88.6157	375.066	865.131	54.3841	285.185	846.913	73.1463	702.552	821.081	487.383	446.329	849.225	499.433	452.126	859.877	427.881	375.471	865.969	457.848	285.261	849.377	451.039
396	3.95	557.463	1267.32	253.774	610.897	1253.85	188.318	595.272	1256.87	322.691	701.783	1130.24	121.101	694.979	1127.36	398.454	616.742	1067.91	257.762	700.125	809.517	29.1689	448.399	856.961	19.903	453.181	856.828	88.62	375.067	865.131	54.3933	285.195	846.887	73.1587	702.487	821.065	487.36	446.329	849.226	499.43	452.087	859.917	427.886	375.452	865.976	457.854	285.247	849.404	451.055
397	3.96	557.44	1267.37	253.798	610.895	1253.87	188.34	595.283	1256.89	322.695	701.752	1130.27	121.086	694.969	1127.39	398.453	616.641	1067.9	257.769	700.143	809.538	29.209	448.348	856.977	19.9167	453.152	856.872	88.6491	375.055	865.139	54.3997	285.167	846.912	73.1813	702.488	821.105	487.35	446.303	849.238	499.429	452.042	859.958	427.868	375.435	866	457.856	285.23	849.43	451.072
398	3.97	557.441	1267.38	253.803	610.909	1253.92	188.337	595.275	1256.9	322.691	701.752	1130.31	121.065	694.928	1127.42	398.427	616.564	1067.9	257.759	700.18	809.549	29.2495	448.342	856.993	19.9124	453.133	856.911	88.6627	375.049	865.139	54.4109	285.166	846.927	73.188	702.51	821.145	487.353	446.289	849.255	499.427	451.956	860.012	427.875	375.443	866.014	457.851	285.227	849.441	451.073
399	3.98	557.465	1267.38	253.783	610.921	1253.94	188.319	595.374	1256.89	322.634	701.715	1130.32	121.065	694.875	1127.43	398.384	616.514	1067.88	257.731	700.18	809.535	29.2452	448.384	856.988	19.899	453.14	856.888	88.6683	375.046	865.149	54.4136	285.182	846.912	73.1848	702.536	821.177	487.378	446.311	849.257	499.438	451.927	860.054	427.868	375.445	866.002	457.85	285.219	849.435	451.06
400	3.99	557.494	1267.39	253.774	610.918	1253.95	188.313	595.447	1256.86	322.633	701.699	1130.34	121.07	694.858	1127.45	398.37	616.503	1067.85	257.724	700.178	809.54	29.2444	448.403	856.992	19.9178	453.162	856.88	88.6767	375.04	865.16	54.4301	285.181	846.907	73.1741	702.535	821.2	487.378	446.327	849.247	499.452	451.964	860.043	427.881	375.464	865.996	457.871	285.216	849.426	451.065
401	4	557.467	1267.4	253.791	610.876	1253.95	188.317	595.413	1256.87	322.668	701.658	1130.34	121.076	694.858	1127.45	398.382	616.481	1067.83	257.76	700.204	809.554	29.2621	448.387	856.999	19.9469	453.164	856.886	88.7108	375.017	865.146	54.4599	285.149	846.895	73.1889	702.556	821.225	487.362	446.337	849.229	499.462	452.025	859.998	427.92	375.467	865.994	457.889	285.217	849.417	451.087
402	4.01	557.456	1267.4	253.791	610.857	1253.92	188.329	595.371	1256.86	322.672	701.633	1130.34	121.058	694.825	1127.45	398.389	616.459	1067.8	257.785	700.222	809.573	29.303	448.391	856.983	19.9696	453.138	856.88	88.7486	374.993	865.123	54.4752	285.147	846.913	73.2012	702.532	821.198	487.356	446.331	849.214	499.468	452.063	859.96	427.922	375.491	865.974	457.892	285.239	849.394	451.108
403	4.02	557.467	1267.39	253.74	610.886	1253.88	188.314	595.429	1256.85	322.638	701.595	1130.35	121.054	694.792	1127.43	398.369	616.427	1067.77	257.761	700.215	809.591	29.3085	448.384	856.969	19.9746	453.137	856.834	88.7325	374.982	865.118	54.468	285.14	846.879	73.2047	702.499	821.158	487.377	446.317	849.191	499.468	452.113	859.914	427.904	375.477	865.948	457.89	285.238	849.353	451.093
404	4.03	557.539	1267.35	253.693	610.879	1253.86	188.304	595.479	1256.85	322.608	701.568	1130.35	121.048	694.782	1127.41	398.357	616.46	1067.74	257.739	700.208	809.61	29.2945	448.39	856.959	19.9656	453.146	856.798	88.6929	374.999	865.104	54.456	285.144	846.862	73.1877	702.502	821.169	487.385	446.315	849.184	499.471	452.139	859.88	427.903	375.471	865.939	457.888	285.234	849.326	451.079
405	4.04	557.531	1267.34	253.654	610.887	1253.86	188.258	595.514	1256.83	322.579	701.555	1130.37	121.052	694.786	1127.43	398.38	616.455	1067.76	257.738	700.231	809.643	29.3049	448.358	856.983	19.9617	453.147	856.803	88.671	374.982	865.127	54.4497	285.128	846.893	73.1685	702.521	821.174	487.384	446.314	849.184	499.476	452.131	859.882	427.904	375.47	865.948	457.884	285.241	849.341	451.073
406	4.05	557.466	1267.38	253.594	610.889	1253.88	188.219	595.469	1256.86	322.541	701.571	1130.41	121.044	694.778	1127.46	398.378	616.39	1067.82	257.725	700.259	809.662	29.2983	448.364	857.009	19.9504	453.16	856.824	88.6644	374.979	865.14	54.4218	285.154	846.909	73.1574	702.536	821.192	487.375	446.292	849.211	499.469	452.109	859.913	427.908	375.449	865.964	457.874	285.234	849.376	451.068
407	4.06	557.376	1267.43	253.525	610.9	1253.89	188.173	595.418	1256.93	322.497	701.597	1130.45	121.044	694.774	1127.5	398.371	616.312	1067.91	257.708	700.261	809.675	29.2987	448.353	857.023	19.9239	453.16	856.878	88.664	375.009	865.163	54.3986	285.14	846.943	73.144	702.534	821.22	487.376	446.276	849.236	499.447	452.037	859.946	427.875	375.434	865.986	457.85	285.217	849.411	451.064
408	4.07	557.339	1267.48	253.498	610.89	1253.89	188.151	595.423	1256.96	322.462	701.598	1130.47	121.032	694.747	1127.54	398.393	616.26	1068	257.717	700.241	809.674	29.3097	448.371	857.012	19.9154	453.162	856.938	88.6727	374.985	865.192	54.4081	285.133	846.985	73.1617	702.487	821.2	487.368	446.269	849.259	499.444	451.994	860.017	427.9	375.43	866.016	457.851	285.204	849.457	451.062
409	4.08	557.33	1267.48	253.508	610.902	1253.88	188.154	595.391	1256.94	322.468	701.613	1130.47	121.049	694.748	1127.54	398.413	616.243	1068.02	257.757	700.177	809.643	29.3332	448.361	857.039	19.9728	453.201	856.957	88.686	374.96	865.191	54.4328	285.175	846.966	73.1872	702.467	821.183	487.363	446.272	849.277	499.471	451.966	860.037	427.915	375.428	866.031	457.878	285.199	849.484	451.089
410	4.09	557.355	1267.44	253.482	610.922	1253.84	188.149	595.388	1256.92	322.466	701.64	1130.47	121.054	694.733	1127.52	398.42	616.229	1067.98	257.769	700.158	809.623	29.3216	448.358	857.032	19.9787	453.202	856.947	88.6932	374.988	865.175	54.4378	285.185	846.951	73.1902	702.469	821.191	487.377	446.267	849.262	499.488	451.979	860.038	427.926	375.424	866.023	457.895	285.193	849.469	451.089
411	4.1	557.424	1267.34	253.406	610.944	1253.79	188.096	595.46	1256.88	322.422	701.625	1130.45	121.058	694.78	1127.46	398.399	616.296	1067.86	257.762	700.171	809.599	29.3249	448.359	856.987	19.9565	453.142	856.881	88.6793	375.005	865.136	54.4209	285.18	846.9	73.1582	702.458	821.174	487.393	446.263	849.23	499.492	451.979	859.996	427.928	375.421	865.999	457.874	285.185	849.415	451.063
412	4.11	557.475	1267.26	253.353	610.934	1253.74	188.06	595.527	1256.82	322.379	701.645	1130.42	121.038	694.837	1127.41	398.368	616.372	1067.76	257.76	700.141	809.58	29.3241	448.357	856.945	19.9348	453.16	856.784	88.6587	374.999	865.091	54.4053	285.165	846.873	73.1414	702.448	821.149	487.362	446.285	849.196	499.502	451.992	859.956	427.925	375.423	865.958	457.864	285.196	849.364	451.053
413	4.12	557.478	1267.22	253.335	610.909	1253.71	188.047	595.513	1256.8	322.393	701.641	1130.41	121.06	694.846	1127.37	398.388	616.419	1067.71	257.767	700.155	809.585	29.3324	448.396	856.912	19.9235	453.156	856.763	88.6632	374.984	865.07	54.4174	285.187	846.843	73.1451	702.426	821.119	487.344	446.302	849.162	499.507	452.07	859.915	427.937	375.444	865.926	457.882	285.214	849.336	451.076
414	4.13	557.432	1267.24	253.314	610.943	1253.71	188.04	595.402	1256.86	322.391	701.655	1130.39	121.068	694.848	1127.36	398.422	616.361	1067.74	257.786	700.191	809.586	29.3757	448.401	856.907	19.9434	453.129	856.795	88.6922	374.978	865.085	54.4422	285.167	846.865	73.1671	702.48	821.127	487.376	446.299	849.152	499.514	452.065	859.893	427.947	375.438	865.928	457.899	285.245	849.326	451.102
415	4.14	557.358	1267.3	253.286	610.953	1253.72	188.029	595.309	1256.88	322.365	701.661	1130.39	121.081	694.86	1127.38	398.422	616.296	1067.81	257.779	700.212	809.593	29.4287	448.411	856.945	19.9358	453.105	856.876	88.6976	374.983	865.108	54.4299	285.128	846.902	73.1856	702.492	821.148	487.368	446.3	849.153	499.513	452.072	859.878	427.944	375.433	865.937	457.895	285.248	849.351	451.109
416	4.15	557.345	1267.33	253.255	610.93	1253.75	188.018	595.369	1256.88	322.332	701.671	1130.39	121.088	694.843	1127.41	398.426	616.237	1067.88	257.768	700.225	809.606	29.4486	448.388	856.972	19.9285	453.098	856.92	88.7017	374.95	865.135	54.4363	285.131	846.935	73.1707	702.49	821.173	487.372	446.315	849.165	499.505	452.07	859.905	427.948	375.454	865.956	457.895	285.227	849.379	451.102
417	4.16	557.347	1267.35	253.219	610.947	1253.77	187.987	595.397	1256.93	322.311	701.669	1130.43	121.075	694.847	1127.45	398.436	616.273	1067.9	257.762	700.243	809.598	29.4723	448.359	856.98	19.9186	453.153	856.939	88.6941	374.959	865.16	54.4323	285.145	846.968	73.1591	702.475	821.192	487.399	446.305	849.186	499.516	452.059	859.945	427.951	375.461	865.976	457.899	285.223	849.401	451.091
418	4.17	557.309	1267.37	253.176	610.99	1253.77	187.967	595.312	1256.95	322.308	701.651	1130.46	121.065	694.824	1127.47	398.429	616.285	1067.93	257.739	700.273	809.612	29.5062	448.322	857.02	19.93	453.179	856.954	88.6622	374.984	865.162	54.4073	285.14	846.975	73.1447	702.456	821.208	487.408	446.263	849.211	499.505	451.963	859.992	427.928	375.432	865.991	457.874	285.211	849.437	451.068
419	4.18	557.311	1267.36	253.132	610.98	1253.78	187.981	595.342	1256.94	322.272	701.64	1130.48	121.08	694.803	1127.45	398.413	616.314	1067.96	257.707	700.259	809.625	29.5339	448.288	857.025	19.9306	453.12	856.924	88.6572	374.987	865.165	54.4085	285.131	846.967	73.1446	702.437	821.233	487.408	446.229	849.223	499.492	451.858	860.032	427.936	375.394	865.994	457.863	285.181	849.452	451.05
420	4.19	557.362	1267.33	253.109	611.016	1253.77	187.963	595.402	1256.9	322.262	701.647	1130.48	121.079	694.789	1127.45	398.402	616.41	1067.97	257.687	700.245	809.621	29.5474	448.294	857.021	19.9549	453.105	856.896	88.6726	374.965	865.161	54.4204	285.114	846.949	73.1407	702.381	821.23	487.414	446.22	849.228	499.499	451.819	860.06	427.951	375.392	866.003	457.862	285.183	849.443	451.041
421	4.2	557.409	1267.29	253.101	611.003	1253.73	187.948	595.531	1256.85	322.252	701.624	1130.49	121.083	694.776	1127.45	398.403	616.474	1067.95	257.702	700.23	809.625	29.5686	448.32	857.008	20.0009	453.1	856.847	88.7138	374.984	865.137	54.4423	285.09	846.931	73.1491	702.354	821.206	487.419	446.212	849.229	499.516	451.873	860.058	427.979	375.374	865.996	457.874	285.17	849.412	451.054
422	4.21	557.424	1267.26	253.084	610.981	1253.71	187.954	595.524	1256.84	322.236	701.635	1130.48	121.102	694.761	1127.43	398.388	616.452	1067.95	257.689	700.204	809.618	29.5846	448.359	856.992	20.0144	453.081	856.821	88.7531	374.983	865.126	54.4479	285.085	846.91	73.1502	702.399	821.233	487.429	446.208	849.214	499.522	451.903	860.023	427.995	375.347	865.973	457.873	285.134	849.39	451.054
423	4.22	557.406	1267.26	253.073	610.992	1253.68	187.952	595.48	1256.81	322.212	701.647	1130.48	121.094	694.795	1127.44	398.384	616.438	1067.96	257.668	700.214	809.612	29.6029	448.39	856.984	19.9964	453.082	856.837	88.7707	374.959	865.121	54.4566	285.066	846.924	73.1384	702.421	821.233	487.423	446.198	849.203	499.525	451.894	860.014	427.978	375.372	865.964	457.88	285.126	849.381	451.058
424	4.23	557.377	1267.29	253.083	611.001	1253.71	187.94	595.449	1256.85	322.243	701.63	1130.47	121.074	694.809	1127.44	398.381	616.438	1068	257.672	700.211	809.6	29.5969	448.369	856.992	19.9982	453.08	856.853	88.7629	374.952	865.122	54.4765	285.09	846.925	73.1286	702.416	821.205	487.416	446.232	849.195	499.536	451.995	859.964	427.963	375.395	865.959	457.891	285.164	849.366	451.068
425	4.24	557.392	1267.31	253.119	611.037	1253.73	187.948	595.399	1256.88	322.287	701.653	1130.48	121.097	694.839	1127.45	398.392	616.487	1068.05	257.68	700.17	809.579	29.5799	448.354	857.003	20.0112	453.11	856.891	88.7798	374.988	865.112	54.5027	285.136	846.925	73.1584	702.389	821.19	487.421	446.269	849.186	499.557	452.074	859.946	428.001	375.431	865.953	457.923	285.182	849.369	451.097
426	4.25	557.388	1267.31	253.116	611.047	1253.72	187.967	595.391	1256.88	322.255	701.643	1130.47	121.075	694.855	1127.45	398.378	616.46	1068.11	257.664	700.177	809.546	29.6005	448.329	857	20.0449	453.131	856.899	88.7853	374.984	865.103	54.508	285.13	846.91	73.1804	702.443	821.239	487.473	446.266	849.165	499.566	452.053	859.947	428.001	375.432	865.953	457.927	285.184	849.375	451.103
427	4.26	557.372	1267.32	253.084	611.022	1253.69	187.959	595.346	1256.88	322.222	701.581	1130.46	121.053	694.797	1127.46	398.346	616.417	1068.15	257.653	700.197	809.528	29.5989	448.288	857.011	20.0422	453.119	856.893	88.7586	374.972	865.091	54.4872	285.1	846.911	73.1711	702.412	821.269	487.468	446.253	849.143	499.566	451.989	859.937	427.992	375.366	865.944	457.903	285.169	849.384	451.086
428	4.27	557.347	1267.32	253.069	611.003	1253.7	187.933	595.339	1256.87	322.227	701.607	1130.47	121.035	694.741	1127.46	398.331	616.412	1068.17	257.644	700.21	809.531	29.6097	448.305	856.993	20.0364	453.124	856.879	88.752	374.974	865.086	54.4829	285.124	846.914	73.1528	702.33	821.287	487.45	446.243	849.137	499.579	451.961	859.922	427.982	375.355	865.952	457.912	285.149	849.383	451.077
429	4.28	557.368	1267.29	253.077	611.017	1253.7	187.927	595.341	1256.86	322.244	701.591	1130.48	121.018	694.752	1127.47	398.318	616.425	1068.19	257.638	700.216	809.551	29.6235	448.355	856.98	20.0449	453.129	856.871	88.7824	374.976	865.082	54.4942	285.14	846.901	73.1693	702.344	821.333	487.467	446.219	849.147	499.599	451.898	859.969	427.988	375.346	865.948	457.921	285.127	849.367	451.076
430	4.29	557.376	1267.25	253.067	611.058	1253.69	187.928	595.44	1256.83	322.212	701.535	1130.5	120.993	694.769	1127.49	398.285	616.443	1068.18	257.622	700.252	809.574	29.6309	448.403	856.968	20.0189	453.09	856.815	88.7901	374.981	865.091	54.4995	285.122	846.895	73.1747	702.371	821.416	487.489	446.202	849.168	499.592	451.832	860.033	427.993	375.317	865.944	457.895	285.094	849.359	451.052
431	4.3	557.399	1267.22	253.023	611.053	1253.68	187.896	595.519	1256.81	322.183	701.517	1130.5	120.947	694.801	1127.51	398.228	616.46	1068.17	257.573	700.276	809.603	29.6223	448.43	856.948	19.9805	453.109	856.754	88.7389	374.982	865.093	54.4944	285.101	846.916	73.135	702.342	821.451	487.511	446.18	849.184	499.58	451.849	860.031	427.978	375.293	865.93	457.873	285.066	849.348	451.017
432	4.31	557.443	1267.2	252.982	611.072	1253.67	187.869	595.558	1256.81	322.16	701.533	1130.52	120.915	694.854	1127.54	398.2	616.473	1068.2	257.537	700.266	809.615	29.6525	448.421	856.978	20.0026	453.141	856.747	88.7016	375.005	865.098	54.4754	285.127	846.93	73.1031	702.346	821.473	487.522	446.188	849.2	499.582	451.854	860.04	427.996	375.29	865.933	457.858	285.077	849.356	450.998
433	4.32	557.445	1267.24	253.008	611.099	1253.7	187.89	595.503	1256.83	322.191	701.519	1130.55	120.91	694.883	1127.55	398.208	616.469	1068.27	257.547	700.287	809.616	29.6846	448.394	857.018	20.0293	453.18	856.819	88.7157	375.007	865.105	54.4765	285.16	846.937	73.1223	702.364	821.476	487.527	446.188	849.204	499.593	451.954	860.041	427.995	375.324	865.961	457.894	285.099	849.393	451.031
434	4.33	557.333	1267.32	253.077	611.027	1253.74	187.934	595.385	1256.88	322.215	701.532	1130.57	120.904	694.881	1127.57	398.222	616.395	1068.36	257.576	700.318	809.646	29.7196	448.364	857.039	20.057	453.185	856.92	88.7665	374.978	865.127	54.5182	285.134	846.979	73.1774	702.385	821.482	487.5	446.177	849.2	499.607	451.96	860.012	428.033	375.356	865.989	457.919	285.095	849.434	451.081
435	4.34	557.26	1267.37	253.125	610.94	1253.77	187.965	595.385	1256.88	322.241	701.539	1130.57	120.892	694.873	1127.58	398.229	616.357	1068.41	257.601	700.292	809.636	29.7238	448.294	857.027	20.092	453.194	856.969	88.7945	374.928	865.146	54.535	285.075	847.028	73.2348	702.359	821.462	487.504	446.188	849.183	499.623	451.957	859.977	428.062	375.359	866.003	457.937	285.09	849.457	451.112
436	4.35	557.27	1267.35	253.12	610.926	1253.76	187.962	595.395	1256.83	322.236	701.512	1130.56	120.884	694.894	1127.57	398.214	616.355	1068.4	257.592	700.27	809.643	29.7206	448.312	857.002	20.0799	453.19	856.945	88.7986	374.945	865.139	54.5284	285.074	847.025	73.2141	702.34	821.45	487.529	446.202	849.163	499.631	451.992	859.93	428.058	375.356	865.975	457.935	285.103	849.434	451.101
437	4.36	557.333	1267.28	253.101	610.921	1253.72	187.967	595.45	1256.81	322.249	701.489	1130.55	120.875	694.908	1127.53	398.188	616.405	1068.36	257.571	700.302	809.647	29.7126	448.293	856.993	20.0836	453.162	856.888	88.7898	374.978	865.112	54.5191	285.083	846.973	73.1727	702.384	821.456	487.544	446.198	849.139	499.625	452.002	859.93	428.051	375.361	865.942	457.932	285.103	849.38	451.079
438	4.37	557.365	1267.22	253.113	610.88	1253.67	187.982	595.383	1256.81	322.279	701.481	1130.56	120.885	694.891	1127.51	398.181	616.417	1068.33	257.568	700.283	809.633	29.7008	448.274	856.991	20.1058	453.073	856.835	88.7948	374.932	865.104	54.5227	285.08	846.934	73.1651	702.361	821.46	487.539	446.194	849.129	499.638	451.946	859.941	428.083	375.344	865.913	457.941	285.095	849.334	451.071
439	4.38	557.381	1267.18	253.122	610.889	1253.65	187.974	595.374	1256.81	322.269	701.483	1130.56	120.903	694.909	1127.5	398.195	616.445	1068.31	257.567	700.272	809.645	29.6988	448.315	856.98	20.079	453.024	856.791	88.8052	374.919	865.101	54.5188	285.076	846.907	73.1701	702.306	821.434	487.513	446.199	849.137	499.652	451.922	859.966	428.085	375.297	865.9	457.947	285.08	849.318	451.065
440	4.39	557.424	1267.11	253.072	610.979	1253.61	187.927	595.349	1256.79	322.239	701.533	1130.58	120.908	694.946	1127.48	398.185	616.478	1068.28	257.55	700.245	809.654	29.6673	448.41	856.944	19.9911	453.037	856.742	88.7562	374.941	865.074	54.4955	285.088	846.905	73.1533	702.272	821.426	487.507	446.193	849.155	499.643	451.927	860.006	428.066	375.282	865.897	457.922	285.063	849.31	451.032
441	4.4	557.463	1267.07	253.009	611.048	1253.58	187.861	595.464	1256.76	322.175	701.592	1130.6	120.885	694.983	1127.48	398.167	616.478	1068.27	257.511	700.213	809.644	29.6513	448.414	856.918	19.9546	453.098	856.718	88.6924	374.966	865.064	54.4646	285.118	846.904	73.1058	702.289	821.447	487.5	446.19	849.158	499.607	451.92	860.035	428.042	375.284	865.898	457.889	285.059	849.314	450.996
442	4.41	557.435	1267.12	252.994	611.037	1253.6	187.863	595.53	1256.77	322.143	701.567	1130.63	120.891	694.957	1127.5	398.175	616.421	1068.34	257.503	700.215	809.656	29.6338	448.383	856.966	19.9854	453.126	856.765	88.7148	374.948	865.072	54.4795	285.136	846.908	73.0999	702.278	821.449	487.483	446.166	849.173	499.599	451.854	860.089	428.029	375.293	865.926	457.894	285.039	849.356	451.01
443	4.42	557.295	1267.2	253.022	610.995	1253.65	187.908	595.394	1256.83	322.166	701.545	1130.65	120.907	694.884	1127.53	398.209	616.346	1068.45	257.544	700.234	809.678	29.6396	448.357	857.019	20.0405	453.128	856.882	88.7734	374.928	865.083	54.4978	285.102	846.946	73.1398	702.237	821.435	487.503	446.152	849.183	499.619	451.793	860.125	428.051	375.284	865.975	457.923	285.03	849.422	451.054
444	4.43	557.214	1267.27	253.016	610.988	1253.68	187.912	595.229	1256.87	322.173	701.524	1130.64	120.9	694.842	1127.55	398.224	616.296	1068.52	257.567	700.27	809.704	29.6666	448.303	857.021	20.0738	453.151	856.959	88.7774	374.911	865.092	54.5108	285.073	846.99	73.1634	702.254	821.453	487.536	446.142	849.17	499.626	451.756	860.113	428.049	375.264	865.997	457.931	285.027	849.465	451.077
445	4.44	557.224	1267.27	252.965	611.012	1253.69	187.868	595.223	1256.89	322.143	701.52	1130.63	120.909	694.866	1127.55	398.221	616.283	1068.54	257.562	700.251	809.71	29.6714	448.287	856.995	20.0922	453.149	856.984	88.7663	374.9	865.091	54.5137	285.074	846.99	73.1683	702.257	821.435	487.533	446.151	849.165	499.632	451.8	860.044	428.028	375.274	865.994	457.923	285.048	849.458	451.078
446	4.45	557.314	1267.21	252.921	610.981	1253.64	187.858	595.325	1256.85	322.145	701.539	1130.62	120.922	694.885	1127.53	398.251	616.353	1068.5	257.565	700.237	809.7	29.69	448.328	856.979	20.085	453.139	856.944	88.7857	374.924	865.079	54.54	285.074	846.949	73.1573	702.222	821.411	487.533	446.18	849.147	499.642	451.946	859.972	428.055	375.306	865.967	457.934	285.077	849.412	451.073
447	4.46	557.417	1267.16	252.881	611.018	1253.6	187.833	595.422	1256.8	322.114	701.535	1130.66	120.962	694.898	1127.51	398.259	616.405	1068.48	257.576	700.284	809.724	29.7352	448.356	856.981	20.0906	453.09	856.879	88.846	374.961	865.077	54.5624	285.102	846.906	73.1549	702.256	821.442	487.55	446.215	849.135	499.666	451.991	859.967	428.088	375.348	865.933	457.949	285.108	849.357	451.072
448	4.47	557.435	1267.11	252.823	611.103	1253.57	187.782	595.425	1256.79	322.048	701.546	1130.71	120.971	694.916	1127.49	398.248	616.412	1068.45	257.573	700.297	809.744	29.7582	448.353	857.002	20.1154	453.067	856.818	88.8587	374.957	865.087	54.5744	285.098	846.894	73.1612	702.302	821.484	487.551	446.22	849.132	499.667	452.022	859.958	428.107	375.329	865.896	457.932	285.095	849.321	451.06
449	4.48	557.408	1267.11	252.773	611.146	1253.56	187.76	595.363	1256.78	322.003	701.545	1130.72	120.956	694.889	1127.49	398.232	616.412	1068.43	257.546	700.367	809.788	29.8111	448.358	857.035	20.1429	453.069	856.761	88.8717	374.936	865.094	54.5801	285.089	846.927	73.1504	702.322	821.488	487.573	446.209	849.129	499.658	452.012	859.928	428.102	375.287	865.889	457.916	285.067	849.305	451.033
450	4.49	557.433	1267.12	252.748	611.19	1253.55	187.747	595.371	1256.8	321.999	701.538	1130.75	120.978	694.888	1127.49	398.246	616.434	1068.43	257.526	700.371	809.821	29.8496	448.345	857.042	20.1744	453.118	856.76	88.8871	374.937	865.105	54.5787	285.099	846.945	73.1412	702.277	821.483	487.588	446.204	849.14	499.662	451.99	859.958	428.109	375.308	865.904	457.927	285.058	849.302	451.026
451	4.5	557.418	1267.16	252.739	611.156	1253.6	187.733	595.288	1256.86	322.029	701.526	1130.77	120.979	694.862	1127.51	398.257	616.406	1068.48	257.546	700.359	809.848	29.8585	448.342	857.038	20.175	453.139	856.798	88.9284	374.953	865.098	54.6104	285.104	846.94	73.1596	702.265	821.488	487.574	446.18	849.157	499.663	451.946	860.01	428.116	375.307	865.917	457.929	285.027	849.338	451.042
452	4.51	557.344	1267.21	252.745	611.044	1253.63	187.748	595.185	1256.9	322.024	701.488	1130.78	120.961	694.821	1127.54	398.237	616.316	1068.54	257.561	700.347	809.82	29.8605	448.283	857.046	20.1828	453.131	856.865	88.9448	374.918	865.095	54.6496	285.096	846.951	73.2004	702.291	821.535	487.566	446.135	849.167	499.652	451.803	860.073	428.083	375.267	865.942	457.912	284.966	849.391	451.042
453	4.52	557.287	1267.27	252.757	611.026	1253.65	187.756	595.213	1256.9	322.021	701.439	1130.78	120.978	694.775	1127.56	398.256	616.292	1068.55	257.576	700.305	809.802	29.8599	448.266	857.051	20.2181	453.148	856.909	88.946	374.902	865.087	54.662	285.063	846.994	73.2212	702.284	821.572	487.551	446.111	849.17	499.648	451.651	860.139	428.093	375.23	865.976	457.92	284.949	849.427	451.045
454	4.53	557.373	1267.26	252.767	611.044	1253.66	187.759	595.292	1256.91	322.022	701.422	1130.79	120.993	694.824	1127.57	398.283	616.317	1068.54	257.591	700.29	809.816	29.8679	448.307	857.042	20.2337	453.177	856.902	88.945	374.921	865.076	54.6698	285.117	847.006	73.2224	702.235	821.567	487.568	446.12	849.174	499.678	451.655	860.152	428.125	375.249	865.989	457.947	284.956	849.432	451.067
455	4.54	557.426	1267.24	252.766	611.086	1253.64	187.739	595.338	1256.89	322.007	701.434	1130.79	120.985	694.871	1127.55	398.273	616.351	1068.54	257.599	700.304	809.816	29.8541	448.311	857.043	20.2211	453.176	856.866	88.9278	374.94	865.069	54.6703	285.141	846.985	73.2007	702.216	821.53	487.579	446.162	849.165	499.684	451.664	860.158	428.126	375.264	865.972	457.945	284.985	849.408	451.065
456	4.55	557.415	1267.23	252.726	611.099	1253.61	187.731	595.334	1256.89	321.984	701.427	1130.76	120.954	694.866	1127.52	398.233	616.346	1068.53	257.566	700.341	809.814	29.8604	448.336	857.041	20.1728	453.162	856.839	88.9141	374.932	865.068	54.6419	285.13	846.957	73.1726	702.228	821.517	487.586	446.163	849.152	499.672	451.722	860.109	428.107	375.256	865.951	457.925	284.994	849.38	451.033
457	4.56	557.404	1267.22	252.721	611.067	1253.63	187.737	595.384	1256.88	321.971	701.445	1130.76	120.948	694.878	1127.52	398.228	616.351	1068.54	257.547	700.365	809.782	29.8727	448.33	857.031	20.1546	453.143	856.836	88.9088	374.943	865.068	54.6255	285.1	846.957	73.1622	702.258	821.473	487.584	446.157	849.14	499.669	451.809	860.057	428.124	375.255	865.928	457.917	285.007	849.363	451.025
458	4.57	557.411	1267.21	252.75	611.083	1253.61	187.752	595.404	1256.88	322.003	701.472	1130.73	120.95	694.926	1127.5	398.237	616.391	1068.55	257.559	700.314	809.746	29.8583	448.375	857.031	20.1344	453.137	856.819	88.9116	374.971	865.07	54.6164	285.111	846.95	73.1684	702.225	821.418	487.569	446.172	849.137	499.695	451.883	860.015	428.145	375.295	865.92	457.934	285.04	849.342	451.039
459	4.58	557.406	1267.19	252.769	611.108	1253.58	187.763	595.394	1256.87	322.033	701.501	1130.71	120.942	694.908	1127.48	398.233	616.372	1068.54	257.568	700.31	809.728	29.8164	448.401	857.025	20.1544	453.14	856.811	88.9177	374.985	865.052	54.6165	285.15	846.922	73.171	702.186	821.408	487.559	446.188	849.12	499.711	451.917	859.987	428.134	375.312	865.905	457.94	285.065	849.325	451.042
460	4.59	557.41	1267.15	252.769	611.104	1253.55	187.753	595.393	1256.84	322.021	701.464	1130.71	120.931	694.912	1127.46	398.232	616.381	1068.48	257.551	700.273	809.72	29.8055	448.378	856.999	20.1423	453.108	856.774	88.9241	374.981	865.02	54.609	285.151	846.89	73.1533	702.214	821.444	487.569	446.175	849.103	499.691	451.908	859.974	428.108	375.281	865.898	457.934	285.029	849.316	451.033
461	4.6	557.437	1267.11	252.771	611.105	1253.53	187.754	595.396	1256.83	322.024	701.428	1130.69	120.919	694.923	1127.45	398.227	616.365	1068.46	257.551	700.241	809.699	29.7958	448.353	856.99	20.166	453.112	856.768	88.9366	374.984	864.997	54.6091	285.16	846.856	73.1444	702.234	821.459	487.581	446.157	849.099	499.702	451.874	859.99	428.115	375.255	865.903	457.929	285.003	849.316	451.036
462	4.61	557.455	1267.1	252.815	611.117	1253.53	187.785	595.404	1256.82	322.048	701.425	1130.71	120.93	694.948	1127.48	398.243	616.376	1068.47	257.59	700.295	809.752	29.8214	448.364	856.982	20.2101	453.154	856.781	88.9629	374.994	865.001	54.643	285.162	846.867	73.1873	702.203	821.497	487.577	446.145	849.116	499.734	451.855	860.029	428.149	375.249	865.903	457.957	285.003	849.338	451.058
463	4.62	557.407	1267.12	252.839	611.098	1253.55	187.8	595.298	1256.84	322.082	701.435	1130.77	120.921	694.94	1127.51	398.236	616.355	1068.52	257.606	700.363	809.801	29.8161	448.368	857	20.2277	453.167	856.812	88.9617	374.949	865.033	54.6817	285.155	846.918	73.2113	702.171	821.525	487.582	446.113	849.145	499.746	451.771	860.105	428.173	375.231	865.927	457.957	284.971	849.372	451.079
464	4.63	557.327	1267.16	252.807	611.088	1253.57	187.767	595.246	1256.85	322.062	701.424	1130.82	120.904	694.913	1127.52	398.199	616.317	1068.58	257.568	700.37	809.843	29.8298	448.357	857.034	20.2224	453.173	856.868	88.9431	374.915	865.051	54.6817	285.128	846.96	73.2159	702.189	821.585	487.587	446.09	849.159	499.728	451.631	860.159	428.129	375.213	865.956	457.948	284.923	849.405	451.056
465	4.64	557.344	1267.18	252.756	611.079	1253.59	187.764	595.263	1256.85	322.028	701.445	1130.86	120.895	694.914	1127.54	398.165	616.301	1068.62	257.536	700.351	809.877	29.8479	448.352	857.068	20.1939	453.147	856.875	88.9534	374.929	865.066	54.6833	285.12	846.999	73.2045	702.193	821.606	487.611	446.09	849.168	499.71	451.683	860.173	428.101	375.187	865.967	457.943	284.922	849.418	451.029
466	4.65	557.358	1267.16	252.753	611.074	1253.6	187.77	595.286	1256.85	322.018	701.429	1130.87	120.909	694.922	1127.54	398.149	616.306	1068.62	257.523	700.346	809.884	29.8392	448.372	857.064	20.1805	453.159	856.857	88.9665	374.977	865.07	54.6703	285.133	846.981	73.1852	702.206	821.624	487.625	446.134	849.171	499.707	451.727	860.163	428.109	375.222	865.963	457.94	284.948	849.413	451.027
467	4.66	557.364	1267.15	252.751	611.051	1253.6	187.77	595.306	1256.86	322.009	701.415	1130.88	120.913	694.957	1127.53	398.15	616.27	1068.57	257.525	700.344	809.892	29.8335	448.388	857.07	20.185	453.158	856.832	88.9564	374.962	865.081	54.6641	285.144	846.979	73.1819	702.242	821.619	487.619	446.154	849.16	499.716	451.812	860.116	428.092	375.239	865.956	457.939	284.966	849.4	451.022
468	4.67	557.369	1267.15	252.739	611.047	1253.61	187.767	595.255	1256.87	322.008	701.399	1130.86	120.908	694.966	1127.5	398.148	616.197	1068.52	257.536	700.353	809.896	29.7879	448.364	857.072	20.1914	453.158	856.836	88.9597	374.958	865.064	54.6651	285.156	846.989	73.1808	702.245	821.578	487.611	446.149	849.134	499.713	451.852	860.088	428.11	375.224	865.929	457.93	284.979	849.373	451.019
469	4.68	557.358	1267.15	252.769	611.038	1253.62	187.759	595.246	1256.84	322.038	701.411	1130.83	120.898	694.96	1127.47	398.162	616.171	1068.45	257.547	700.374	809.876	29.7485	448.373	857.038	20.1915	453.172	856.827	88.9683	374.964	865.04	54.6714	285.162	846.965	73.184	702.235	821.544	487.608	446.138	849.109	499.708	451.947	860.003	428.131	375.253	865.905	457.931	285.008	849.345	451.028
470	4.69	557.357	1267.15	252.803	611.043	1253.62	187.787	595.261	1256.81	322.081	701.408	1130.81	120.892	694.94	1127.47	398.202	616.189	1068.42	257.559	700.389	809.885	29.7515	448.392	857.021	20.2118	453.197	856.801	88.9837	374.99	865.019	54.688	285.167	846.944	73.2033	702.242	821.555	487.623	446.153	849.093	499.725	452.018	859.944	428.144	375.269	865.901	457.957	285.025	849.331	451.062
471	4.7	557.337	1267.18	252.83	611.015	1253.62	187.842	595.33	1256.8	322.06	701.389	1130.83	120.899	694.884	1127.49	398.21	616.196	1068.41	257.572	700.342	809.893	29.7437	448.383	857.025	20.2416	453.212	856.805	89.0088	375.014	865.014	54.7104	285.15	846.952	73.234	702.226	821.553	487.617	446.162	849.095	499.734	451.997	859.959	428.144	375.272	865.903	457.965	285.019	849.34	451.077
472	4.71	557.332	1267.18	252.826	611.017	1253.63	187.836	595.338	1256.79	322.044	701.385	1130.86	120.899	694.869	1127.51	398.207	616.156	1068.43	257.576	700.34	809.91	29.7078	448.369	857.04	20.2404	453.166	856.81	89.0119	374.995	865.022	54.7137	285.137	846.948	73.26	702.165	821.515	487.599	446.15	849.119	499.734	451.969	859.983	428.152	375.267	865.911	457.963	285.02	849.348	451.075
473	4.72	557.366	1267.18	252.791	611.035	1253.62	187.784	595.404	1256.8	322.008	701.394	1130.88	120.889	694.876	1127.52	398.187	616.158	1068.46	257.563	700.371	809.915	29.713	448.422	857.031	20.2008	453.168	856.765	89.0011	374.967	865.028	54.6942	285.134	846.941	73.2384	702.11	821.504	487.589	446.15	849.136	499.725	451.894	860.04	428.154	375.232	865.908	457.951	285.003	849.345	451.051
474	4.73	557.399	1267.15	252.743	611.061	1253.59	187.722	595.444	1256.79	321.973	701.385	1130.88	120.879	694.874	1127.53	398.167	616.165	1068.45	257.533	700.35	809.922	29.7235	448.454	857.034	20.1763	453.206	856.734	88.9638	374.991	865.025	54.6798	285.16	846.932	73.185	702.12	821.547	487.596	446.127	849.15	499.721	451.747	860.114	428.15	375.208	865.898	457.934	284.992	849.347	451.026
475	4.74	557.368	1267.17	252.716	611.029	1253.59	187.694	595.366	1256.83	321.971	701.383	1130.88	120.856	694.856	1127.55	398.145	616.133	1068.49	257.51	700.34	809.937	29.7248	448.428	857.051	20.1642	453.202	856.743	88.9477	375.014	865.008	54.6662	285.167	846.932	73.1773	702.122	821.578	487.576	446.1	849.158	499.713	451.692	860.131	428.128	375.193	865.92	457.919	284.957	849.368	451.004
476	4.75	557.267	1267.24	252.731	610.973	1253.61	187.725	595.237	1256.86	322.002	701.355	1130.9	120.852	694.827	1127.59	398.165	616.107	1068.56	257.528	700.288	809.93	29.7241	448.374	857.08	20.1806	453.211	856.817	88.9582	374.984	865.022	54.6674	285.152	846.967	73.2034	702.099	821.569	487.57	446.075	849.162	499.71	451.666	860.139	428.133	375.193	865.953	457.931	284.922	849.402	451.014
477	4.76	557.174	1267.29	252.77	610.925	1253.63	187.761	595.066	1256.9	322.029	701.362	1130.9	120.85	694.834	1127.62	398.21	616.121	1068.59	257.56	700.274	809.915	29.732	448.357	857.09	20.2237	453.248	856.875	88.9806	374.97	865.032	54.7072	285.124	847.017	73.2566	702.118	821.624	487.574	446.095	849.152	499.72	451.666	860.141	428.165	375.184	865.966	457.961	284.907	849.431	451.052
478	4.77	557.181	1267.26	252.78	610.962	1253.61	187.763	595.066	1256.9	322.026	701.395	1130.91	120.854	694.86	1127.62	398.241	616.179	1068.59	257.577	700.323	809.935	29.7703	448.345	857.058	20.2675	453.224	856.871	89.0085	374.972	865.04	54.7294	285.12	847.013	73.2649	702.135	821.61	487.592	446.13	849.139	499.743	451.819	860.067	428.179	375.192	865.958	457.974	284.95	849.421	451.082
479	4.78	557.269	1267.2	252.751	610.982	1253.57	187.743	595.109	1256.87	322.011	701.422	1130.94	120.874	694.912	1127.59	398.228	616.19	1068.61	257.571	700.336	809.953	29.8036	448.383	857.034	20.2882	453.237	856.824	89.0208	374.961	865.027	54.7369	285.128	846.983	73.2476	702.101	821.567	487.616	446.142	849.116	499.751	451.906	860.032	428.176	375.237	865.935	457.964	284.991	849.395	451.071
480	4.79	557.32	1267.13	252.725	611.019	1253.52	187.711	595.198	1256.84	321.993	701.454	1130.95	120.883	694.951	1127.58	398.236	616.227	1068.62	257.568	700.377	809.954	29.8206	448.396	857.035	20.29	453.216	856.779	89.0362	374.963	865.034	54.7389	285.141	846.949	73.2417	702.11	821.572	487.613	446.152	849.108	499.748	451.95	860.001	428.165	375.257	865.916	457.963	285.011	849.369	451.058
481	4.8	557.376	1267.07	252.712	611.085	1253.45	187.682	595.299	1256.82	321.982	701.507	1130.96	120.903	695.002	1127.58	398.258	616.26	1068.63	257.574	700.405	809.962	29.8429	448.405	857.051	20.2456	453.173	856.734	89.0455	374.973	865.024	54.7536	285.177	846.917	73.2286	702.191	821.599	487.614	446.178	849.112	499.759	451.978	859.978	428.184	375.228	865.903	457.975	285.017	849.336	451.053
482	4.81	557.408	1267.01	252.693	611.109	1253.38	187.66	595.334	1256.8	321.981	701.537	1130.96	120.908	695.014	1127.55	398.236	616.275	1068.64	257.567	700.425	809.993	29.8313	448.419	857.058	20.2383	453.153	856.714	89.0457	374.984	865.026	54.7454	285.194	846.908	73.2147	702.256	821.629	487.628	446.182	849.117	499.764	451.962	859.995	428.192	375.231	865.888	457.961	285.035	849.314	451.051
483	4.82	557.422	1266.99	252.671	611.101	1253.35	187.621	595.345	1256.79	321.959	701.549	1130.97	120.896	695.004	1127.53	398.225	616.267	1068.66	257.557	700.431	810.02	29.8239	448.407	857.044	20.2563	453.176	856.715	89.0278	374.98	865.024	54.7183	285.203	846.915	73.1807	702.25	821.634	487.61	446.154	849.12	499.745	451.943	860.013	428.181	375.243	865.887	457.935	285.033	849.32	451.032
484	4.83	557.371	1267.03	252.662	611.102	1253.38	187.632	595.353	1256.8	321.93	701.587	1130.98	120.911	695.006	1127.56	398.242	616.25	1068.68	257.57	700.402	810.037	29.8236	448.34	857.046	20.2873	453.192	856.758	89.0425	374.962	865.021	54.7341	285.164	846.941	73.2087	702.227	821.637	487.596	446.118	849.122	499.737	451.843	860.04	428.188	375.226	865.893	457.931	284.993	849.349	451.034
485	4.84	557.273	1267.09	252.685	611.01	1253.44	187.657	595.252	1256.81	321.936	701.618	1130.99	120.928	695.033	1127.58	398.269	616.252	1068.71	257.585	700.391	810.055	29.8235	448.296	857.049	20.297	453.222	856.817	89.0574	374.929	865.034	54.757	285.121	846.995	73.2552	702.211	821.656	487.625	446.093	849.122	499.75	451.749	860.073	428.195	375.206	865.919	457.944	284.953	849.388	451.054
486	4.85	557.276	1267.12	252.681	610.977	1253.46	187.676	595.318	1256.81	321.929	701.582	1131	120.922	695.023	1127.59	398.303	616.282	1068.74	257.592	700.376	810.056	29.8057	448.292	857.057	20.306	453.219	856.857	89.0541	374.934	865.04	54.7597	285.126	847.032	73.2915	702.187	821.654	487.638	446.066	849.127	499.757	451.716	860.109	428.216	375.205	865.948	457.964	284.955	849.417	451.077
487	4.86	557.307	1267.12	252.659	611.027	1253.44	187.666	595.34	1256.84	321.908	701.568	1131.01	120.914	695.039	1127.6	398.298	616.308	1068.78	257.591	700.381	810.051	29.7784	448.296	857.061	20.3015	453.232	856.863	89.0351	374.961	865.044	54.7498	285.113	847.033	73.273	702.187	821.636	487.636	446.071	849.134	499.762	451.687	860.143	428.206	375.204	865.946	457.963	284.945	849.414	451.064
488	4.87	557.336	1267.11	252.617	611.086	1253.4	187.587	595.394	1256.85	321.849	701.611	1131.02	120.933	695.067	1127.61	398.285	616.32	1068.83	257.578	700.346	810.053	29.7967	448.33	857.058	20.2863	453.226	856.859	89.0179	374.966	865.054	54.7374	285.109	847.012	73.2346	702.176	821.624	487.624	446.099	849.128	499.749	451.732	860.139	428.194	375.205	865.94	457.952	284.955	849.4	451.044
489	4.88	557.35	1267.12	252.578	611.068	1253.41	187.548	595.332	1256.89	321.842	701.657	1131.05	120.909	695.077	1127.61	398.278	616.324	1068.88	257.561	700.364	810.056	29.8191	448.308	857.059	20.2641	453.204	856.832	89.013	374.956	865.051	54.7132	285.16	846.99	73.2096	702.131	821.573	487.599	446.131	849.121	499.738	451.764	860.116	428.184	375.204	865.938	457.934	284.96	849.392	451.03
490	4.89	557.305	1267.17	252.562	611.051	1253.43	187.528	595.309	1256.91	321.808	701.67	1131.07	120.897	695.092	1127.61	398.308	616.326	1068.92	257.562	700.363	810.056	29.831	448.3	857.071	20.2507	453.216	856.845	89.0039	374.952	865.039	54.7066	285.157	846.988	73.1975	702.144	821.561	487.591	446.158	849.124	499.744	451.83	860.114	428.207	375.198	865.926	457.941	284.954	849.388	451.027
491	4.9	557.296	1267.17	252.545	611.015	1253.43	187.51	595.323	1256.92	321.789	701.675	1131.07	120.916	695.079	1127.61	398.325	616.375	1068.94	257.567	700.38	810.053	29.8446	448.329	857.063	20.2615	453.206	856.84	89.0212	374.969	865.031	54.7435	285.146	846.971	73.2085	702.146	821.57	487.589	446.162	849.116	499.747	451.901	860.076	428.199	375.192	865.906	457.953	284.964	849.364	451.031
492	4.91	557.358	1267.12	252.495	611.048	1253.37	187.489	595.414	1256.88	321.784	701.667	1131.07	120.928	695.091	1127.58	398.329	616.425	1068.95	257.569	700.435	810.085	29.8569	448.385	857.041	20.2548	453.21	856.787	89.0456	374.971	865.005	54.7561	285.167	846.928	73.2124	702.183	821.579	487.616	446.154	849.097	499.757	451.934	860.028	428.193	375.204	865.878	457.952	284.994	849.324	451.031
493	4.92	557.419	1267.06	252.441	611.112	1253.3	187.441	595.525	1256.81	321.744	701.648	1131.04	120.923	695.143	1127.55	398.331	616.472	1068.96	257.571	700.383	810.085	29.8503	448.384	857.027	20.2526	453.164	856.716	89.0519	374.965	864.982	54.7372	285.17	846.891	73.1914	702.187	821.597	487.65	446.135	849.088	499.767	451.942	859.996	428.189	375.203	865.853	457.945	284.99	849.305	451.03
494	4.93	557.418	1267.01	252.395	611.113	1253.26	187.409	595.567	1256.78	321.695	701.603	1131.03	120.946	695.153	1127.54	398.344	616.488	1068.95	257.567	700.328	810.071	29.8797	448.352	857.018	20.2672	453.152	856.702	89.0627	374.959	864.975	54.749	285.119	846.904	73.1876	702.137	821.586	487.655	446.135	849.076	499.776	451.946	859.983	428.192	375.198	865.844	457.944	284.994	849.29	451.036
495	4.94	557.413	1267.02	252.363	611.151	1253.25	187.4	595.647	1256.78	321.646	701.602	1131.05	120.97	695.123	1127.54	398.367	616.512	1068.96	257.583	700.348	810.109	29.8988	448.36	857.033	20.3097	453.196	856.735	89.0775	374.975	864.995	54.7706	285.13	846.92	73.1981	702.122	821.595	487.641	446.136	849.095	499.781	451.961	860	428.203	375.22	865.868	457.963	284.989	849.317	451.042
496	4.95	557.425	1267.08	252.325	611.16	1253.29	187.394	595.614	1256.84	321.608	701.629	1131.08	120.981	695.141	1127.59	398.392	616.483	1069	257.58	700.378	810.14	29.9194	448.377	857.059	20.3124	453.261	856.829	89.0631	374.973	865.015	54.7783	285.132	846.984	73.2202	702.187	821.64	487.658	446.124	849.114	499.778	451.877	860.067	428.232	375.239	865.91	457.978	284.988	849.369	451.06
497	4.96	557.35	1267.16	252.256	611.13	1253.35	187.338	595.474	1256.94	321.548	701.652	1131.1	120.962	695.122	1127.63	398.408	616.442	1069.07	257.547	700.369	810.144	29.9281	448.356	857.1	20.2941	453.28	856.933	89.0344	374.956	865.038	54.7691	285.072	847.055	73.2423	702.183	821.653	487.665	446.112	849.131	499.769	451.765	860.121	428.235	375.179	865.962	457.974	284.971	849.423	451.07
498	4.97	557.276	1267.2	252.169	611.085	1253.41	187.286	595.383	1256.99	321.471	701.628	1131.11	120.93	695.084	1127.65	398.403	616.398	1069.13	257.528	700.33	810.122	29.936	448.307	857.113	20.2664	453.261	857	89.0148	374.923	865.078	54.7336	285.042	847.102	73.2356	702.179	821.667	487.679	446.098	849.142	499.754	451.748	860.132	428.196	375.16	865.989	457.958	284.945	849.465	451.063
499	4.98	557.257	1267.18	252.11	611.07	1253.36	187.245	595.413	1256.98	321.368	701.606	1131.11	120.926	695.096	1127.64	398.38	616.389	1069.16	257.508	700.348	810.122	29.9312	448.317	857.106	20.2633	453.249	856.984	89.0129	374.952	865.087	54.7274	285.086	847.075	73.2086	702.182	821.667	487.677	446.099	849.146	499.743	451.694	860.167	428.179	375.186	865.977	457.945	284.945	849.458	451.05
500	4.99	557.282	1267.11	252.05	611.03	1253.31	187.21	595.397	1256.98	321.312	701.648	1131.11	120.926	695.099	1127.62	398.379	616.455	1069.15	257.496	700.338	810.112	29.9322	448.307	857.091	20.3062	453.246	856.929	89.0233	374.958	865.06	54.7481	285.095	847.016	73.1968	702.161	821.662	487.674	446.094	849.141	499.755	451.653	860.178	428.189	375.197	865.947	457.934	284.959	849.419	451.034
501	5	557.243	1267.02	251.998	611.001	1253.21	187.153	595.354	1256.94	321.275	701.645	1131.11	120.914	695.071	1127.59	398.378	616.488	1069.12	257.494	700.364	810.115	29.9483	448.311	857.08	20.2974	453.147	856.86	89.0381	374.93	865.039	54.751	285.063	846.967	73.17	702.116	821.62	487.669	446.092	849.123	499.754	451.725	860.101	428.167	375.152	865.904	457.931	284.949	849.364	451.01
502	5.01	557.262	1266.91	251.948	611.01	1253.07	187.087	595.41	1256.85	321.205	701.641	1131.09	120.898	695.063	1127.56	398.368	616.505	1069.1	257.494	700.397	810.128	29.9488	448.374	857.046	20.277	453.114	856.751	89.0498	374.918	865.002	54.7423	285.073	846.919	73.1602	702.108	821.594	487.658	446.095	849.11	499.75	451.77	860.043	428.19	375.127	865.866	457.923	284.947	849.305	451.009
503	5.02	557.306	1266.82	251.892	611.027	1252.99	187.033	595.508	1256.78	321.142	701.66	1131.09	120.9	695.114	1127.55	398.37	616.602	1069.08	257.467	700.378	810.111	29.9428	448.434	857.016	20.2643	453.112	856.657	89.053	374.964	864.966	54.7383	285.121	846.898	73.1569	702.125	821.577	487.634	446.125	849.096	499.768	451.807	860.029	428.212	375.157	865.834	457.925	284.978	849.262	451.013
504	5.03	557.25	1266.8	251.844	610.987	1252.97	186.996	595.451	1256.8	321.094	701.701	1131.1	120.897	695.108	1127.57	398.379	616.632	1069.11	257.449	700.387	810.11	29.9527	448.427	857.024	20.2501	453.166	856.667	89.0375	374.996	864.96	54.7314	285.118	846.909	73.1598	702.083	821.526	487.625	446.139	849.088	499.765	451.794	860.03	428.204	375.181	865.837	457.927	284.972	849.271	451.009
505	5.04	557.135	1266.84	251.817	610.96	1252.99	186.964	595.286	1256.88	321.053	701.74	1131.12	120.891	695.067	1127.64	398.395	616.588	1069.18	257.447	700.384	810.122	29.9554	448.348	857.046	20.28	453.185	856.794	89.0403	374.966	864.989	54.7356	285.09	846.942	73.1731	702.076	821.524	487.615	446.121	849.101	499.761	451.766	860.084	428.206	375.185	865.881	457.934	284.932	849.328	451.029
506	5.05	557.051	1266.9	251.789	610.916	1253.02	186.93	595.154	1256.95	321.009	701.753	1131.14	120.88	695.056	1127.71	398.404	616.585	1069.25	257.442	700.367	810.133	29.9616	448.313	857.076	20.2762	453.232	856.9	89.0241	374.96	865.025	54.7369	285.111	846.992	73.176	702.065	821.519	487.597	446.11	849.124	499.756	451.728	860.13	428.186	375.171	865.92	457.939	284.92	849.391	451.048
507	5.06	557.028	1266.91	251.758	610.907	1253.03	186.908	595.112	1256.98	320.987	701.786	1131.15	120.875	695.06	1127.76	398.396	616.633	1069.31	257.442	700.339	810.143	29.9307	448.356	857.09	20.2596	453.292	856.958	89.0169	374.998	865.05	54.7374	285.124	847.032	73.1902	702.067	821.541	487.58	446.105	849.149	499.747	451.684	860.151	428.186	375.177	865.947	457.934	284.942	849.442	451.055
508	5.07	556.996	1266.88	251.726	610.84	1253.02	186.87	595.081	1256.99	320.956	701.809	1131.16	120.867	695.087	1127.79	398.395	616.641	1069.35	257.441	700.311	810.146	29.9315	448.357	857.095	20.2603	453.273	856.987	89.0131	374.991	865.04	54.7341	285.13	847.037	73.1884	702.062	821.584	487.581	446.092	849.151	499.749	451.663	860.183	428.216	375.188	865.966	457.942	284.928	849.459	451.06
509	5.08	556.973	1266.8	251.694	610.765	1252.94	186.827	594.991	1256.97	320.899	701.793	1131.17	120.859	695.064	1127.8	398.382	616.64	1069.37	257.425	700.288	810.138	29.9183	448.352	857.089	20.2544	453.257	856.958	89.0178	374.954	865.019	54.74	285.113	847.023	73.1859	702.023	821.579	487.61	446.042	849.148	499.758	451.594	860.221	428.232	375.141	865.958	457.958	284.893	849.45	451.058
510	5.09	556.965	1266.7	251.655	610.721	1252.84	186.78	594.987	1256.89	320.838	701.831	1131.16	120.83	695.07	1127.77	398.357	616.69	1069.34	257.408	700.294	810.126	29.9307	448.318	857.065	20.2661	453.25	856.91	89.028	374.961	865.011	54.7423	285.095	846.948	73.1708	702.01	821.58	487.616	446.045	849.14	499.764	451.557	860.199	428.235	375.147	865.928	457.946	284.907	849.421	451.051
511	5.1	556.972	1266.62	251.585	610.712	1252.76	186.73	595.03	1256.82	320.757	701.817	1131.14	120.817	695.088	1127.73	398.31	616.737	1069.3	257.384	700.292	810.134	29.9202	448.291	857.058	20.2844	453.18	856.822	89.036	374.976	864.996	54.7492	285.103	846.9	73.1708	702.034	821.61	487.607	446.07	849.129	499.765	451.67	860.137	428.258	375.149	865.883	457.927	284.93	849.363	451.032
512	5.11	556.958	1266.55	251.497	610.677	1252.71	186.671	594.996	1256.8	320.664	701.818	1131.14	120.818	695.098	1127.75	398.29	616.715	1069.3	257.36	700.307	810.13	29.9245	448.33	857.064	20.264	453.125	856.757	89.0231	374.944	864.999	54.7346	285.108	846.899	73.1625	702.044	821.649	487.62	446.077	849.133	499.758	451.703	860.147	428.233	375.119	865.861	457.906	284.927	849.322	451.013
513	5.12	556.887	1266.54	251.381	610.631	1252.7	186.59	594.9	1256.81	320.556	701.827	1131.15	120.815	695.067	1127.77	398.277	616.681	1069.36	257.321	700.338	810.159	29.9361	448.382	857.075	20.2286	453.094	856.782	89.0115	374.907	865.011	54.7175	285.085	846.921	73.1352	702.054	821.671	487.622	446.064	849.138	499.747	451.756	860.124	428.193	375.116	865.863	457.892	284.919	849.318	450.989
514	5.13	556.836	1266.56	251.301	610.615	1252.74	186.55	594.77	1256.82	320.454	701.839	1131.18	120.793	695.051	1127.8	398.295	616.681	1069.43	257.312	700.345	810.156	29.9394	448.383	857.105	20.2037	453.128	856.844	88.9943	374.878	865.048	54.7089	285.094	846.956	73.1224	702.061	821.697	487.653	446.077	849.143	499.753	451.782	860.116	428.176	375.116	865.877	457.901	284.93	849.35	451.001
515	5.14	556.751	1266.59	251.246	610.582	1252.76	186.527	594.599	1256.9	320.393	701.838	1131.19	120.777	695.066	1127.82	398.329	616.657	1069.49	257.336	700.36	810.155	29.9482	448.332	857.109	20.2197	453.221	856.9	89.0006	374.877	865.057	54.7262	285.087	847.007	73.1407	702.06	821.687	487.651	446.092	849.137	499.765	451.786	860.115	428.179	375.152	865.912	457.93	284.927	849.389	451.033
516	5.15	556.659	1266.58	251.168	610.532	1252.72	186.481	594.487	1256.89	320.304	701.827	1131.15	120.763	695.023	1127.83	398.358	616.658	1069.54	257.35	700.38	810.169	29.9541	448.295	857.083	20.2659	453.239	856.951	89.018	374.865	865.066	54.7321	285.054	847.041	73.1524	702.071	821.674	487.647	446.091	849.123	499.767	451.764	860.102	428.209	375.171	865.932	457.942	284.918	849.401	451.055
517	5.16	556.634	1266.52	251.063	610.546	1252.68	186.415	594.391	1256.89	320.222	701.804	1131.14	120.784	694.995	1127.82	398.383	616.698	1069.58	257.357	700.381	810.166	29.953	448.265	857.074	20.3057	453.202	856.982	89.0297	374.892	865.061	54.7377	285.036	847.018	73.1676	702.088	821.686	487.668	446.074	849.114	499.779	451.684	860.12	428.224	375.173	865.923	457.948	284.922	849.399	451.069
518	5.17	556.621	1266.43	250.962	610.583	1252.62	186.337	594.418	1256.82	320.13	701.827	1131.13	120.812	695.002	1127.81	398.402	616.757	1069.61	257.359	700.307	810.152	29.9479	448.247	857.073	20.3119	453.157	856.964	89.0555	374.894	865.035	54.7575	285.036	846.953	73.1741	702.075	821.692	487.681	446.049	849.112	499.795	451.633	860.138	428.245	375.165	865.912	457.95	284.913	849.383	451.074
519	5.18	556.598	1266.36	250.86	610.554	1252.54	186.282	594.352	1256.8	320.016	701.847	1131.17	120.817	694.985	1127.8	398.415	616.779	1069.6	257.345	700.272	810.156	29.9745	448.266	857.075	20.3014	453.146	856.903	89.0648	374.879	865.015	54.7685	285.036	846.923	73.1624	702.045	821.672	487.673	446.049	849.11	499.795	451.667	860.161	428.242	375.166	865.901	457.948	284.891	849.373	451.065
520	5.19	556.497	1266.3	250.721	610.476	1252.52	186.209	594.165	1256.83	319.892	701.846	1131.2	120.799	694.938	1127.81	398.411	616.784	1069.63	257.321	700.299	810.157	29.9785	448.28	857.064	20.288	453.146	856.865	89.0473	374.886	865.016	54.7591	285.028	846.93	73.1492	701.97	821.649	487.657	446.027	849.132	499.781	451.633	860.221	428.25	375.107	865.89	457.923	284.866	849.361	451.028
521	5.2	556.426	1266.26	250.575	610.447	1252.45	186.121	594.091	1256.81	319.79	701.911	1131.24	120.792	694.91	1127.82	398.406	616.764	1069.69	257.308	700.295	810.161	29.9486	448.294	857.077	20.2705	453.134	856.871	89.0123	374.871	865.038	54.7372	285.047	846.952	73.113	701.94	821.647	487.657	446.006	849.141	499.775	451.488	860.286	428.231	375.09	865.894	457.9	284.856	849.36	451.009
522	5.21	556.365	1266.25	250.434	610.441	1252.4	186.033	594.048	1256.81	319.671	701.954	1131.27	120.795	694.926	1127.83	398.43	616.777	1069.76	257.292	700.278	810.21	29.9521	448.315	857.098	20.2373	453.157	856.882	89.0034	374.882	865.041	54.729	285.069	846.956	73.0898	701.934	821.63	487.657	446.016	849.144	499.782	451.418	860.298	428.225	375.107	865.906	457.902	284.857	849.366	451.004
523	5.22	556.28	1266.24	250.33	610.399	1252.35	185.978	593.962	1256.82	319.577	701.955	1131.28	120.792	694.998	1127.82	398.454	616.797	1069.84	257.286	700.292	810.252	29.9419	448.352	857.107	20.2301	453.174	856.907	89.0043	374.931	865.037	54.7279	285.075	846.96	73.0821	701.933	821.576	487.651	446.041	849.144	499.786	451.505	860.261	428.227	375.118	865.914	457.912	284.883	849.382	451.013
524	5.23	556.173	1266.21	250.212	610.359	1252.31	185.901	593.899	1256.82	319.49	701.961	1131.28	120.791	695.024	1127.81	398.482	616.821	1069.91	257.287	700.302	810.256	29.921	448.356	857.112	20.2309	453.217	856.953	88.9879	374.935	865.042	54.7097	285.049	846.969	73.0843	701.937	821.558	487.637	446.047	849.138	499.774	451.569	860.232	428.212	375.122	865.911	457.918	284.89	849.389	451.025
525	5.24	556.085	1266.18	250.095	610.318	1252.26	185.817	593.807	1256.8	319.414	701.985	1131.28	120.803	695.024	1127.8	398.521	616.796	1069.98	257.298	700.258	810.23	29.9323	448.343	857.099	20.245	453.219	856.982	88.9825	374.908	865.046	54.7162	285.033	846.973	73.105	701.905	821.549	487.645	446.049	849.117	499.78	451.679	860.186	428.237	375.135	865.907	457.938	284.898	849.389	451.045
526	5.25	555.98	1266.12	249.996	610.265	1252.17	185.776	593.684	1256.78	319.374	702.031	1131.27	120.83	695.034	1127.81	398.564	616.749	1070.05	257.337	700.232	810.24	29.9539	448.299	857.08	20.2735	453.205	856.987	89.0201	374.91	865.031	54.7463	285.03	846.954	73.1178	701.892	821.547	487.641	446.041	849.103	499.802	451.759	860.121	428.236	375.114	865.904	457.962	284.893	849.383	451.067
527	5.26	555.889	1266.05	249.844	610.184	1252.08	185.727	593.58	1256.73	319.288	702.073	1131.28	120.839	695.044	1127.8	398.592	616.748	1070.08	257.368	700.257	810.248	29.9338	448.278	857.059	20.2766	453.185	856.999	89.0188	374.897	865.018	54.7513	285.016	846.963	73.0918	701.892	821.565	487.644	446.055	849.097	499.808	451.753	860.111	428.251	375.12	865.902	457.964	284.868	849.369	451.074
528	5.27	555.76	1265.97	249.647	610.122	1252.04	185.666	593.4	1256.69	319.168	702.09	1131.31	120.833	695.071	1127.79	398.588	616.742	1070.11	257.351	700.295	810.273	29.9183	448.266	857.062	20.2805	453.179	856.971	89.0086	374.872	865.023	54.7373	284.964	846.968	73.0633	701.981	821.596	487.656	446.043	849.103	499.81	451.721	860.151	428.28	375.121	865.886	457.949	284.865	849.35	451.065
529	5.28	555.669	1265.88	249.441	610.089	1251.99	185.586	593.149	1256.65	319.023	702.115	1131.32	120.838	695.098	1127.79	398.606	616.781	1070.13	257.333	700.302	810.302	29.938	448.262	857.076	20.2847	453.143	856.924	89.0211	374.855	865.036	54.7199	284.965	846.951	73.0359	702.006	821.602	487.67	446.021	849.117	499.821	451.623	860.191	428.262	375.077	865.872	457.939	284.865	849.338	451.052
530	5.29	555.625	1265.78	249.229	610.115	1251.93	185.487	592.908	1256.6	318.901	702.158	1131.35	120.832	695.11	1127.8	398.605	616.809	1070.14	257.331	700.277	810.327	29.9563	448.336	857.084	20.2471	453.137	856.91	89.0142	374.843	865.053	54.7253	284.972	846.937	73.0282	702	821.596	487.652	446.026	849.132	499.802	451.582	860.231	428.276	375.08	865.875	457.927	284.862	849.34	451.04
531	5.3	555.605	1265.67	249	610.16	1251.87	185.347	592.679	1256.54	318.74	702.201	1131.38	120.821	695.109	1127.8	398.602	616.839	1070.13	257.324	700.233	810.319	29.925	448.305	857.084	20.2462	453.146	856.915	89.0166	374.84	865.057	54.7263	284.965	846.952	73.0255	701.975	821.608	487.63	446.027	849.148	499.779	451.518	860.288	428.243	375.088	865.885	457.915	284.847	849.351	451.027
532	5.31	555.519	1265.58	248.758	610.198	1251.81	185.221	592.314	1256.51	318.58	702.199	1131.37	120.816	695.085	1127.81	398.613	616.76	1070.17	257.329	700.219	810.32	29.9239	448.264	857.094	20.2704	453.127	856.943	89.0239	374.827	865.054	54.7266	284.966	846.957	73.0089	701.948	821.639	487.613	445.995	849.148	499.784	451.443	860.3	428.21	375.061	865.903	457.911	284.824	849.366	451.024
533	5.32	555.442	1265.48	248.55	610.252	1251.77	185.077	591.966	1256.51	318.448	702.183	1131.38	120.823	695.1	1127.82	398.642	616.67	1070.19	257.36	700.213	810.332	29.9446	448.256	857.095	20.2814	453.141	857.006	89.0242	374.826	865.06	54.7389	284.964	846.959	73.0238	701.967	821.659	487.631	445.983	849.144	499.804	451.443	860.284	428.222	375.025	865.922	457.925	284.804	849.384	451.057
534	5.33	555.437	1265.38	248.348	610.415	1251.73	184.896	591.715	1256.5	318.309	702.248	1131.37	120.862	695.1	1127.83	398.681	616.655	1070.14	257.398	700.204	810.346	29.9733	448.259	857.091	20.303	453.169	857.035	89.0392	374.833	865.081	54.7665	284.938	846.994	73.0366	701.985	821.656	487.641	445.991	849.143	499.827	451.479	860.293	428.279	375.047	865.922	457.957	284.818	849.398	451.097
535	5.34	555.451	1265.31	248.1	610.665	1251.68	184.669	591.502	1256.51	318.126	702.283	1131.38	120.881	695.117	1127.85	398.715	616.703	1070.06	257.423	700.234	810.349	29.9615	448.235	857.107	20.319	453.177	857.034	89.0431	374.829	865.085	54.7565	284.934	847.006	73.036	701.989	821.618	487.638	446.022	849.124	499.833	451.536	860.279	428.298	375.1	865.916	457.977	284.851	849.393	451.104
536	5.35	555.445	1265.26	247.782	611	1251.62	184.371	591.205	1256.51	317.905	702.294	1131.37	120.874	695.137	1127.84	398.71	616.705	1069.95	257.406	700.228	810.314	29.9529	448.21	857.127	20.2842	453.14	857.001	89.0156	374.817	865.075	54.7255	284.918	847.007	72.9951	701.986	821.565	487.611	446.012	849.102	499.823	451.571	860.245	428.263	375.081	865.902	457.969	284.865	849.372	451.098
537	5.36	555.4	1265.25	247.377	611.225	1251.56	184.095	590.937	1256.5	317.639	702.336	1131.35	120.886	695.19	1127.82	398.709	616.733	1069.83	257.385	700.215	810.293	29.9625	448.233	857.116	20.2618	453.123	856.96	88.9952	374.855	865.062	54.7057	284.966	846.984	72.9539	701.997	821.527	487.602	446.029	849.097	499.829	451.579	860.22	428.233	375.083	865.876	457.959	284.878	849.345	451.092
538	5.37	555.33	1265.24	246.919	611.514	1251.5	183.798	590.72	1256.48	317.319	702.394	1131.35	120.915	695.225	1127.79	398.769	616.679	1069.7	257.404	700.233	810.294	29.9546	448.305	857.113	20.243	453.125	856.953	88.9983	374.889	865.049	54.698	284.999	846.971	72.931	702	821.474	487.569	446.069	849.103	499.836	451.669	860.211	428.257	375.128	865.869	457.965	284.907	849.323	451.098
539	5.38	555.093	1265.29	246.388	611.629	1251.47	183.554	590.292	1256.52	317.006	702.413	1131.34	120.923	695.186	1127.78	398.856	616.516	1069.55	257.477	700.21	810.276	29.9337	448.311	857.092	20.2444	453.096	856.966	89.0129	374.883	865.034	54.702	285.014	846.948	72.9333	701.946	821.419	487.553	446.083	849.1	499.844	451.651	860.241	428.309	375.123	865.878	457.977	284.906	849.325	451.106
540	5.39	554.807	1265.35	245.779	611.723	1251.44	183.305	589.809	1256.59	316.651	702.41	1131.35	120.957	695.117	1127.79	398.969	616.314	1069.38	257.57	700.163	810.253	29.8877	448.262	857.071	20.2714	453.119	856.994	89.0205	374.853	865.034	54.7023	284.979	846.936	72.9476	701.881	821.367	487.54	446.052	849.099	499.847	451.551	860.258	428.326	375.079	865.89	458.008	284.862	849.348	451.129
541	5.4	554.622	1265.37	245.123	611.795	1251.39	183.048	589.342	1256.66	316.15	702.405	1131.34	121.001	695.043	1127.81	399.106	616.161	1069.15	257.667	700.136	810.271	29.8599	448.235	857.066	20.2885	453.156	857.025	89.0218	374.846	865.032	54.7254	284.918	846.933	72.9739	701.844	821.329	487.521	446.024	849.102	499.854	451.484	860.292	428.327	375.08	865.91	458.041	284.839	849.365	451.167
542	5.41	554.58	1265.36	244.443	611.877	1251.32	182.74	588.818	1256.73	315.561	702.365	1131.34	121.055	694.953	1127.79	399.218	616.022	1068.91	257.784	700.173	810.309	29.8537	448.228	857.06	20.3118	453.202	857.02	89.0297	374.841	865.018	54.7365	284.911	846.933	72.9746	701.848	821.304	487.498	446.012	849.108	499.874	451.472	860.325	428.367	375.082	865.918	458.063	284.833	849.367	451.184
543	5.42	554.569	1265.39	243.687	611.912	1251.29	182.364	588.302	1256.81	314.932	702.337	1131.36	121.106	694.898	1127.77	399.329	615.802	1068.69	257.898	700.188	810.379	29.8525	448.226	857.06	20.3053	453.194	857.001	89.0088	374.841	865.02	54.7015	284.929	846.93	72.9543	701.846	821.262	487.46	445.986	849.111	499.875	451.412	860.378	428.365	375.09	865.92	458.061	284.811	849.361	451.179
544	5.43	554.407	1265.48	242.755	612.039	1251.24	181.924	587.771	1256.92	314.29	702.338	1131.42	121.161	694.904	1127.75	399.431	615.556	1068.47	258.009	700.159	810.409	29.835	448.197	857.078	20.28	453.055	856.969	89.0124	374.804	865.036	54.6869	284.912	846.935	72.9309	701.843	821.181	487.443	445.947	849.114	499.878	451.361	860.396	428.36	375.048	865.907	458.03	284.783	849.348	451.162
545	5.44	554.319	1265.54	241.646	612.445	1251.2	181.38	587.302	1256.98	313.531	702.376	1131.48	121.222	694.942	1127.71	399.552	615.413	1068.3	258.105	700.205	810.472	29.811	448.2	857.097	20.2767	453.015	856.974	89.0061	374.792	865.057	54.6694	284.885	846.962	72.9159	701.863	821.111	487.423	445.952	849.115	499.893	451.326	860.404	428.369	375.059	865.909	458.027	284.805	849.338	451.166
546	5.45	554.297	1265.53	240.536	613.087	1251.1	180.713	586.753	1256.97	312.627	702.408	1131.53	121.281	695.015	1127.68	399.696	615.349	1068.17	258.188	700.216	810.51	29.7838	448.217	857.135	20.2668	453.078	857.018	88.9974	374.798	865.092	54.6697	284.921	846.979	72.8796	701.847	821.007	487.391	446	849.104	499.895	451.415	860.372	428.356	375.086	865.915	458.056	284.823	849.34	451.183
547	5.46	554.205	1265.49	239.436	613.64	1250.93	179.964	585.964	1257.05	311.705	702.418	1131.55	121.348	695.064	1127.61	399.815	615.242	1068.13	258.237	700.189	810.525	29.7698	448.211	857.156	20.2428	453.116	857.07	88.9797	374.798	865.104	54.6591	284.885	847.011	72.8639	701.849	820.918	487.368	446.028	849.09	499.902	451.503	860.344	428.346	375.067	865.926	458.109	284.838	849.356	451.208
548	5.47	554.028	1265.36	238.244	613.885	1250.64	179.301	585.197	1257.08	310.84	702.432	1131.57	121.408	695.174	1127.55	399.942	615.169	1068.09	258.302	700.196	810.567	29.7949	448.174	857.142	20.2558	453.12	857.1	88.9845	374.769	865.102	54.6532	284.836	847.018	72.8426	701.934	820.864	487.369	446.06	849.057	499.906	451.584	860.261	428.366	375.071	865.926	458.157	284.855	849.343	451.235
549	5.48	553.834	1265.15	237.022	614.308	1250.33	178.814	584.394	1257.09	309.968	702.422	1131.58	121.492	695.281	1127.48	400.067	615.218	1068.04	258.387	700.245	810.6	29.7803	448.152	857.124	20.3066	453.134	857.111	88.9973	374.773	865.096	54.6766	284.835	847.001	72.8426	701.948	820.794	487.338	446.092	849.026	499.914	451.669	860.206	428.392	375.111	865.921	458.233	284.885	849.31	451.285
550	5.49	553.795	1264.86	235.711	614.731	1249.99	178.326	583.424	1257.13	309.004	702.405	1131.58	121.583	695.382	1127.42	400.168	615.388	1067.94	258.435	700.248	810.626	29.7877	448.155	857.105	20.3438	453.115	857.082	89.03	374.807	865.059	54.7011	284.827	846.974	72.8633	701.926	820.732	487.316	446.113	849.012	499.929	451.736	860.207	428.418	375.165	865.907	458.326	284.916	849.289	451.344
551	5.5	553.998	1264.48	234.279	615.252	1249.65	177.724	582.433	1257.17	307.985	702.44	1131.63	121.65	695.44	1127.39	400.24	615.507	1067.85	258.452	700.253	810.666	29.8229	448.197	857.068	20.3387	453.073	857.034	89.0534	374.816	865.038	54.706	284.819	846.95	72.8422	701.897	820.7	487.302	446.094	849.018	499.928	451.651	860.242	428.397	375.175	865.891	458.359	284.904	849.281	451.371
552	5.51	553.984	1264.15	232.821	616.077	1249.35	176.877	581.332	1257.21	306.948	702.475	1131.68	121.736	695.474	1127.38	400.315	615.551	1067.76	258.462	700.196	810.69	29.8646	448.223	857.064	20.3144	453.065	856.992	89.0577	374.793	865.049	54.6934	284.845	846.935	72.8276	701.878	820.71	487.3	446.049	849.034	499.907	451.523	860.286	428.337	375.144	865.889	458.359	284.871	849.303	451.372
553	5.52	553.828	1263.86	231.275	616.974	1249.08	176.033	580.155	1257.28	305.809	702.555	1131.73	121.803	695.55	1127.41	400.382	615.546	1067.7	258.484	700.17	810.757	29.8682	448.213	857.099	20.3354	453.073	857.005	89.0692	374.79	865.05	54.6846	284.858	846.945	72.8129	701.829	820.702	487.287	446.03	849.06	499.882	451.452	860.306	428.31	375.154	865.889	458.373	284.843	849.327	451.374
554	5.53	553.756	1263.56	229.783	617.566	1248.8	175.438	579.056	1257.34	304.586	702.614	1131.78	121.862	695.622	1127.45	400.427	615.5	1067.68	258.503	700.172	810.801	29.8898	448.23	857.128	20.3327	453.074	857.035	89.0691	374.793	865.066	54.6644	284.841	846.978	72.7914	701.878	820.74	487.288	446.045	849.082	499.865	451.425	860.349	428.286	375.16	865.901	458.388	284.822	849.354	451.38
555	5.54	553.743	1263.23	228.139	618.067	1248.5	174.851	578.126	1257.19	303.253	702.668	1131.78	121.915	695.679	1127.48	400.469	615.48	1067.68	258.501	700.109	810.801	29.9272	448.243	857.152	20.3043	453.079	857.055	89.0554	374.78	865.092	54.6481	284.834	846.997	72.7611	701.859	820.716	487.281	446.047	849.088	499.837	451.382	860.37	428.245	375.148	865.909	458.395	284.801	849.365	451.39
556	5.55	553.729	1262.86	226.448	618.591	1248.14	174.151	577.309	1256.93	301.905	702.764	1131.78	121.941	695.76	1127.47	400.54	615.543	1067.69	258.481	700.112	810.815	29.9472	448.238	857.16	20.3212	453.078	857.066	89.0493	374.792	865.109	54.6474	284.844	846.994	72.7322	701.835	820.692	487.297	446.051	849.083	499.82	451.399	860.328	428.23	375.146	865.913	458.417	284.796	849.358	451.412
557	5.56	553.811	1262.4	224.922	619.353	1247.77	173.272	576.272	1256.67	300.583	702.883	1131.77	122	695.843	1127.43	400.623	615.647	1067.66	258.459	700.154	810.842	29.9728	448.252	857.141	20.3276	453.046	857.054	89.0717	374.845	865.084	54.6632	284.825	846.982	72.7255	701.865	820.673	487.295	446.083	849.063	499.82	451.506	860.245	428.223	375.165	865.912	458.464	284.826	849.344	451.451
558	5.57	552.895	1262.28	223.031	620.246	1247.47	172.372	575.301	1256.44	299.233	703.01	1131.73	122.048	695.862	1127.37	400.723	615.702	1067.61	258.435	700.121	810.804	29.9775	448.229	857.111	20.3563	453.054	857.022	89.0871	374.85	865.069	54.6676	284.827	846.965	72.7348	701.835	820.609	487.296	446.108	849.043	499.816	451.578	860.183	428.228	375.201	865.891	458.495	284.839	849.325	451.486
559	5.58	551.008	1262.51	220.817	620.851	1247.17	171.739	574.631	1256.17	297.807	703.132	1131.67	122.056	695.876	1127.34	400.763	615.692	1067.54	258.372	700.143	810.763	29.9781	448.182	857.085	20.3704	453.05	857.023	89.0911	374.838	865.081	54.6608	284.811	846.972	72.7339	701.857	820.581	487.303	446.104	849.02	499.8	451.632	860.146	428.203	375.207	865.879	458.503	284.846	849.312	451.495
560	5.59	550.829	1262.19	219.06	621.386	1246.83	171.116	573.845	1255.94	296.378	703.274	1131.67	122.052	695.888	1127.32	400.769	615.678	1067.49	258.293	700.198	810.753	29.9949	448.19	857.11	20.3381	453.023	857.025	89.0651	374.793	865.094	54.6426	284.825	846.976	72.7116	701.886	820.584	487.308	446.085	849.018	499.784	451.614	860.134	428.178	375.219	865.867	458.499	284.858	849.314	451.484
561	5.6	550.821	1261.8	217.484	621.833	1246.52	170.441	572.842	1255.83	295.025	703.434	1131.69	122.064	695.944	1127.33	400.784	615.736	1067.46	258.263	700.193	810.743	30.0091	448.184	857.13	20.3302	453.025	857.035	89.0607	374.784	865.109	54.6334	284.802	846.991	72.6988	701.849	820.562	487.297	446.119	849.031	499.787	451.535	860.187	428.191	375.227	865.875	458.504	284.852	849.339	451.496
562	5.61	550.878	1261.43	215.931	622.471	1246.26	169.628	572.078	1255.6	293.702	703.528	1131.69	122.104	695.864	1127.36	400.82	615.849	1067.46	258.223	700.197	810.745	30.0117	448.207	857.133	20.3437	453.024	857.042	89.0569	374.807	865.125	54.6277	284.813	847.023	72.701	701.838	820.586	487.303	446.121	849.057	499.796	451.487	860.258	428.204	375.238	865.878	458.52	284.828	849.358	451.509
563	5.62	550.993	1261.05	214.536	623.205	1246.02	168.838	571.469	1255.28	292.393	703.542	1131.67	122.113	695.734	1127.37	400.85	615.867	1067.45	258.166	700.154	810.746	30.0399	448.206	857.158	20.321	452.989	857.027	89.0317	374.797	865.136	54.6215	284.825	847.039	72.6831	701.837	820.596	487.303	446.083	849.07	499.783	451.394	860.285	428.176	375.232	865.88	458.519	284.786	849.377	451.516
564	5.63	551.209	1260.63	213.16	623.65	1245.76	168.234	570.577	1255.04	291.181	703.583	1131.65	122.101	695.605	1127.38	400.843	615.9	1067.4	258.109	700.112	810.746	30.0533	448.198	857.152	20.2986	452.991	857.011	89.0225	374.797	865.124	54.6294	284.81	847.023	72.6656	701.82	820.599	487.272	446.076	849.062	499.753	451.309	860.309	428.159	375.223	865.885	458.513	284.748	849.398	451.509
565	5.64	551.302	1260.19	211.891	623.931	1245.48	167.678	569.793	1254.88	290.159	703.702	1131.62	122.104	695.509	1127.4	400.845	615.932	1067.33	258.057	700.109	810.748	30.0441	448.219	857.098	20.3017	453.035	856.984	89.0406	374.858	865.088	54.6253	284.788	847.009	72.6753	701.797	820.614	487.246	446.107	849.062	499.751	451.39	860.288	428.168	375.249	865.889	458.533	284.775	849.414	451.517
566	5.65	551.266	1259.75	210.848	624.13	1245.12	167.097	568.968	1254.75	289.175	703.686	1131.59	122.085	695.31	1127.42	400.858	615.828	1067.24	257.988	700.111	810.735	30.0024	448.226	857.051	20.3104	453.019	856.978	89.0536	374.86	865.075	54.6373	284.776	846.989	72.6985	701.758	820.59	487.267	446.11	849.059	499.75	451.444	860.235	428.151	375.259	865.89	458.557	284.773	849.423	451.537
567	5.66	551.244	1259.28	209.871	624.359	1244.74	166.446	568.121	1254.56	288.126	703.635	1131.54	122	695.086	1127.47	400.85	615.622	1067.16	257.863	700.16	810.719	29.955	448.253	857.017	20.2978	452.971	857.013	89.0146	374.821	865.084	54.6348	284.77	846.974	72.6905	701.71	820.578	487.299	446.084	849.055	499.736	451.356	860.146	428.095	375.217	865.881	458.565	284.747	849.422	451.54
[truncated: 3 more columns]

## Sheet: Trial01
PathFileType	4	(X/Y/Z)	Trial01.trc
DataRate	CameraRate	NumFrames	NumMarkers	Units	OrigDataRate	OrigDataStartFrame	OrigNumFrames
100	100	753	16	mm	100	1	753
Frame#	Time	nasion			r zyg pr			l zyg pr			r should			l should			sternum			r elbow			r ulna			r radius			r hand			r finger			l elbow			l ulna			l radius			l hand			l finger
		X1	Y1	Z1	X2	Y2	Z2	X3	Y3	Z3	X4	Y4	Z4	X5	Y5	Z5	X6	Y6	Z6	X7	Y7	Z7	X8	Y8	Z8	X9	Y9	Z9	X10	Y10	Z10	X11	Y11	Z11	X12	Y12	Z12	X13	Y13	Z13	X14	Y14	Z14	X15	Y15	Z15	X16	Y16	Z16
1	0	549.773	1263.13	251.984	603.983	1249.81	187.021	587.28	1254.94	321.7	718.247	1121.69	128.987	705.3	1116.05	392.209	613.264	1064.85	255.405	627.397	835.089	-5.40695	377.844	858.031	39.4294	390.794	860.654	107.15	311.562	867.781	80.4583	223.697	848.353	107.547	648.089	826.461	519.623	394.654	842.071	480.481	406.941	872.802	414.275	328.725	866.768	437.57	240.491	848.311	421.573
2	0.01	549.743	1263.11	252.012	603.94	1249.78	187.035	587.237	1254.99	321.724	718.472	1121.63	128.827	705.281	1116.02	392.218	613.295	1064.78	255.449	627.413	835.104	-5.39166	377.837	858.033	39.419	390.771	860.623	107.148	311.509	867.785	80.4666	223.677	848.366	107.578	647.964	826.437	519.638	394.579	842.081	480.488	406.836	872.785	414.255	328.731	866.746	437.588	240.495	848.311	421.583
3	0.02	549.761	1263.06	252.017	603.93	1249.76	187.016	587.276	1254.92	321.728	718.494	1121.6	128.778	705.271	1116.02	392.212	613.326	1064.72	255.447	627.382	835.081	-5.41023	377.825	858.01	39.4028	390.758	860.605	107.129	311.523	867.772	80.4445	223.678	848.328	107.56	647.891	826.441	519.644	394.554	842.089	480.492	406.838	872.758	414.253	328.743	866.723	437.56	240.525	848.281	421.551
4	0.03	549.845	1263	251.999	603.931	1249.72	187.013	587.292	1254.84	321.71	718.503	1121.57	128.774	705.311	1116.03	392.206	613.4	1064.66	255.418	627.313	835.014	-5.44505	377.845	857.985	39.3704	390.758	860.598	107.099	311.567	867.743	80.4112	223.703	848.289	107.531	647.909	826.478	519.713	394.571	842.08	480.485	406.866	872.724	414.249	328.773	866.696	437.522	240.552	848.245	421.506
5	0.04	549.88	1262.97	251.985	603.942	1249.72	187.005	587.261	1254.84	321.702	718.516	1121.55	128.764	705.379	1116.04	392.209	613.397	1064.62	255.442	627.314	834.948	-5.44605	377.882	857.972	39.3392	390.784	860.599	107.1	311.566	867.754	80.3957	223.742	848.268	107.523	647.905	826.511	519.774	394.614	842.071	480.474	406.927	872.713	414.249	328.819	866.68	437.508	240.576	848.21	421.495
6	0.05	549.844	1263	251.981	603.924	1249.73	187.003	587.19	1254.87	321.732	718.561	1121.56	128.759	705.44	1116.03	392.217	613.297	1064.63	255.475	627.326	834.951	-5.46085	377.859	857.989	39.3555	390.782	860.625	107.11	311.563	867.78	80.4093	223.734	848.265	107.544	647.976	826.527	519.804	394.7	842.06	480.471	407.04	872.687	414.273	328.832	866.686	437.517	240.615	848.188	421.507
7	0.06	549.776	1263.03	251.983	603.922	1249.72	186.997	587.133	1254.89	321.72	718.54	1121.56	128.741	705.45	1116.02	392.208	613.218	1064.64	255.496	627.325	834.953	-5.44658	377.854	858.011	39.3656	390.775	860.636	107.105	311.523	867.793	80.4247	223.723	848.294	107.563	647.993	826.519	519.819	394.732	842.043	480.455	407.115	872.629	414.289	328.821	866.7	437.515	240.637	848.188	421.51
8	0.07	549.746	1263.01	251.983	603.938	1249.7	186.99	587.109	1254.91	321.707	718.541	1121.54	128.756	705.446	1116	392.199	613.236	1064.62	255.504	627.347	834.973	-5.42496	377.883	858.002	39.3495	390.773	860.631	107.105	311.533	867.776	80.4221	223.749	848.297	107.558	647.935	826.498	519.826	394.726	842.013	480.456	407.148	872.601	414.277	328.843	866.679	437.526	240.652	848.18	421.512
9	0.08	549.763	1262.98	251.982	603.919	1249.69	187.018	587.058	1254.94	321.707	718.563	1121.54	128.786	705.467	1115.98	392.219	613.266	1064.58	255.524	627.34	835.001	-5.42361	377.889	858.016	39.3633	390.761	860.617	107.124	311.549	867.768	80.4312	223.765	848.28	107.557	647.955	826.505	519.855	394.701	842.004	480.45	407.117	872.606	414.268	328.856	866.672	437.525	240.656	848.192	421.518
10	0.09	549.733	1262.98	251.994	603.907	1249.69	187.02	587.015	1254.93	321.715	718.584	1121.53	128.795	705.488	1115.99	392.228	613.243	1064.58	255.564	627.376	835.062	-5.40957	377.857	858.025	39.3929	390.771	860.612	107.135	311.52	867.78	80.4454	223.717	848.316	107.581	647.957	826.514	519.877	394.679	842.004	480.46	407.103	872.629	414.255	328.847	866.684	437.54	240.636	848.219	421.532
11	0.1	549.686	1263	251.989	603.867	1249.72	187.014	587.021	1254.95	321.716	718.569	1121.53	128.8	705.481	1116	392.246	613.206	1064.59	255.595	627.402	835.114	-5.38563	377.841	858.056	39.3929	390.759	860.639	107.142	311.475	867.809	80.453	223.675	848.356	107.599	647.907	826.515	519.86	394.624	842.043	480.466	407.056	872.651	414.241	328.789	866.726	437.556	240.569	848.265	421.533
12	0.11	549.671	1263.01	251.959	603.848	1249.72	187.009	587.045	1254.96	321.681	718.547	1121.55	128.828	705.469	1116.01	392.251	613.148	1064.61	255.626	627.41	835.101	-5.36996	377.805	858.081	39.3884	390.74	860.661	107.14	311.431	867.845	80.4579	223.659	848.373	107.592	647.818	826.527	519.844	394.56	842.106	480.467	406.953	872.71	414.238	328.725	866.765	437.537	240.521	848.302	421.529
13	0.12	549.667	1263	251.909	603.877	1249.69	186.98	586.999	1254.98	321.67	718.576	1121.57	128.837	705.479	1116.03	392.248	613.182	1064.61	255.631	627.387	835.067	-5.36901	377.83	858.099	39.3744	390.74	860.668	107.125	311.465	867.848	80.447	223.697	848.36	107.59	647.854	826.573	519.854	394.55	842.158	480.457	406.922	872.763	414.213	328.733	866.772	437.507	240.496	848.322	421.511
14	0.13	549.662	1262.97	251.87	603.925	1249.66	186.948	587.044	1254.94	321.643	718.608	1121.57	128.832	705.54	1116.03	392.253	613.243	1064.56	255.616	627.375	835.044	-5.37861	377.838	858.112	39.3553	390.743	860.677	107.102	311.483	867.853	80.4215	223.705	848.351	107.557	647.872	826.574	519.836	394.58	842.174	480.44	406.983	872.773	414.199	328.755	866.764	437.485	240.481	848.318	421.485
15	0.14	549.716	1262.93	251.829	603.991	1249.62	186.914	587.053	1254.9	321.585	718.651	1121.56	128.841	705.548	1116.01	392.252	613.302	1064.53	255.582	627.371	834.995	-5.38958	377.851	858.079	39.3283	390.727	860.675	107.091	311.494	867.834	80.4012	223.708	848.334	107.532	647.858	826.523	519.815	394.628	842.146	480.427	407.007	872.751	414.202	328.764	866.749	437.457	240.511	848.281	421.476
16	0.15	549.808	1262.88	251.808	604.02	1249.6	186.896	587.164	1254.83	321.546	718.685	1121.53	128.873	705.561	1115.98	392.275	613.362	1064.44	255.603	627.369	834.973	-5.38502	377.899	858.029	39.3445	390.737	860.645	107.091	311.565	867.8	80.3864	223.758	848.262	107.517	647.89	826.462	519.814	394.686	842.074	480.428	407.06	872.667	414.222	328.832	866.696	437.47	240.57	848.218	421.474
17	0.16	549.903	1262.82	251.817	604.039	1249.58	186.895	587.296	1254.79	321.554	718.69	1121.49	128.903	705.62	1115.93	392.306	613.456	1064.36	255.664	627.384	834.988	-5.37897	377.89	858.012	39.371	390.792	860.601	107.11	311.618	867.766	80.3884	223.789	848.247	107.518	647.966	826.394	519.803	394.734	842.022	480.452	407.111	872.606	414.236	328.891	866.645	437.511	240.641	848.172	421.504
18	0.17	549.916	1262.83	251.837	604.042	1249.55	186.903	587.266	1254.82	321.581	718.695	1121.45	128.904	705.627	1115.9	392.303	613.465	1064.34	255.714	627.422	835.023	-5.35708	377.856	857.995	39.3983	390.792	860.582	107.142	311.585	867.756	80.4087	223.76	848.272	107.543	647.995	826.359	519.808	394.724	841.989	480.464	407.157	872.527	414.253	328.928	866.627	437.544	240.695	848.151	421.535
19	0.18	549.839	1262.9	251.845	604.008	1249.57	186.92	587.11	1254.9	321.59	718.724	1121.43	128.91	705.619	1115.87	392.312	613.392	1064.38	255.723	627.453	835.062	-5.34106	377.875	857.995	39.3984	390.759	860.589	107.135	311.543	867.765	80.4131	223.724	848.307	107.569	647.912	826.336	519.81	394.716	841.975	480.457	407.186	872.507	414.258	328.86	866.657	437.548	240.689	848.178	421.541
20	0.19	549.81	1262.96	251.833	603.985	1249.59	186.932	587.072	1254.99	321.589	718.719	1121.45	128.914	705.611	1115.89	392.309	613.322	1064.43	255.722	627.498	835.092	-5.32266	377.902	858.023	39.3903	390.76	860.612	107.131	311.498	867.794	80.4409	223.728	848.334	107.575	647.901	826.366	519.801	394.726	841.997	480.452	407.117	872.571	414.232	328.84	866.706	437.559	240.672	848.215	421.545
21	0.2	549.815	1263.01	251.822	604.029	1249.64	186.928	587.093	1255.06	321.575	718.743	1121.48	128.922	705.644	1115.91	392.313	613.333	1064.44	255.716	627.491	835.083	-5.31069	377.876	858.053	39.3885	390.789	860.64	107.127	311.517	867.809	80.4287	223.739	848.348	107.579	647.99	826.446	519.814	394.723	842.051	480.461	407.054	872.642	414.225	328.828	866.737	437.554	240.641	848.253	421.545
22	0.21	549.801	1263.04	251.808	604.056	1249.68	186.911	587.096	1255.06	321.55	718.744	1121.51	128.919	705.594	1115.94	392.311	613.337	1064.47	255.7	627.447	835.062	-5.31941	377.827	858.078	39.3912	390.768	860.659	107.116	311.534	867.816	80.4015	223.76	848.352	107.57	647.997	826.471	519.813	394.696	842.109	480.475	407.042	872.707	414.237	328.817	866.763	437.541	240.594	848.284	421.536
23	0.22	549.819	1263.05	251.764	604.122	1249.69	186.868	587.131	1255.05	321.49	718.769	1121.53	128.92	705.594	1115.97	392.307	613.347	1064.47	255.656	627.43	835.029	-5.34083	377.814	858.077	39.3858	390.762	860.663	107.098	311.533	867.827	80.3867	223.758	848.325	107.53	647.976	826.499	519.801	394.655	842.166	480.457	406.99	872.779	414.228	328.79	866.781	437.51	240.526	848.316	421.515
24	0.23	549.884	1263.03	251.746	604.146	1249.67	186.853	587.152	1255.04	321.466	718.771	1121.54	128.93	705.616	1115.98	392.3	613.423	1064.42	255.623	627.441	835.017	-5.34824	377.839	858.07	39.3609	390.779	860.654	107.093	311.529	867.826	80.3829	223.754	848.305	107.522	647.958	826.509	519.796	394.636	842.177	480.434	406.991	872.8	414.2	328.776	866.759	437.492	240.522	848.306	421.494
25	0.24	549.928	1263.01	251.762	604.126	1249.65	186.862	587.268	1254.97	321.438	718.629	1121.53	129.004	705.61	1115.95	392.299	613.504	1064.38	255.611	627.439	835.014	-5.3416	377.869	858.041	39.3435	390.777	860.624	107.107	311.542	867.803	80.3782	223.76	848.293	107.509	647.938	826.467	519.803	394.622	842.143	480.444	407.006	872.745	414.216	328.797	866.736	437.498	240.556	848.269	421.5
26	0.25	549.942	1262.99	251.792	604.112	1249.65	186.88	587.357	1254.96	321.448	718.5	1121.5	129.08	705.609	1115.92	392.297	613.543	1064.36	255.631	627.447	835.017	-5.3507	377.867	858.028	39.3719	390.764	860.597	107.131	311.549	867.787	80.395	223.766	848.299	107.526	647.92	826.423	519.811	394.608	842.098	480.461	407.008	872.672	414.242	328.825	866.706	437.525	240.575	848.256	421.519
27	0.26	549.929	1263	251.826	604.072	1249.66	186.915	587.376	1255.02	321.496	718.67	1121.46	128.972	705.653	1115.9	392.302	613.51	1064.34	255.673	627.431	835.007	-5.33117	377.845	858.03	39.3895	390.761	860.6	107.143	311.541	867.791	80.4062	223.738	848.297	107.541	647.884	826.388	519.787	394.639	842.055	480.461	407.033	872.623	414.258	328.835	866.687	437.542	240.605	848.234	421.531
28	0.27	549.965	1263.01	251.845	604.099	1249.68	186.933	587.433	1255	321.508	718.712	1121.45	128.953	705.688	1115.89	392.298	613.492	1064.35	255.679	627.394	835.006	-5.33055	377.878	858.033	39.3745	390.754	860.622	107.135	311.558	867.787	80.4114	223.741	848.291	107.534	647.911	826.369	519.792	394.696	842.02	480.458	407.125	872.57	414.271	328.869	866.68	437.54	240.658	848.204	421.537
29	0.28	550.031	1263.03	251.829	604.138	1249.7	186.912	587.427	1255.01	321.473	718.749	1121.43	128.933	705.689	1115.89	392.284	613.57	1064.34	255.633	627.429	835.015	-5.36252	377.902	858.047	39.3561	390.751	860.625	107.1	311.586	867.789	80.4021	223.734	848.294	107.524	647.997	826.383	519.798	394.746	842.015	480.453	407.188	872.533	414.268	328.911	866.666	437.533	240.708	848.185	421.54
30	0.29	550.043	1263.06	251.819	604.152	1249.73	186.896	587.47	1255.01	321.447	718.751	1121.43	128.909	705.673	1115.88	392.263	613.608	1064.36	255.575	627.444	835.022	-5.36637	377.898	858.048	39.3456	390.766	860.638	107.086	311.605	867.791	80.3804	223.744	848.305	107.529	647.994	826.383	519.783	394.753	842.023	480.458	407.144	872.58	414.26	328.926	866.679	437.534	240.714	848.201	421.537
31	0.3	550.003	1263.12	251.841	604.145	1249.77	186.918	587.375	1255.06	321.489	718.753	1121.42	128.897	705.671	1115.9	392.263	613.562	1064.39	255.571	627.46	835.056	-5.34514	377.869	858.052	39.3509	390.778	860.645	107.108	311.585	867.808	80.3813	223.747	848.344	107.542	647.98	826.388	519.78	394.754	842.043	480.457	407.053	872.642	414.251	328.916	866.719	437.525	240.691	848.227	421.543
32	0.31	549.95	1263.16	251.89	604.126	1249.79	186.957	587.356	1255.07	321.53	718.73	1121.41	128.896	705.651	1115.9	392.26	613.506	1064.41	255.591	627.468	835.076	-5.34123	377.871	858.078	39.3635	390.773	860.665	107.126	311.563	867.815	80.3909	223.705	848.378	107.567	647.969	826.403	519.772	394.728	842.076	480.453	407.055	872.646	414.263	328.886	866.743	437.556	240.651	848.257	421.551
33	0.32	549.938	1263.16	251.914	604.095	1249.8	186.967	587.346	1255.08	321.558	718.701	1121.41	128.888	705.641	1115.89	392.258	613.548	1064.39	255.586	627.459	835.061	-5.35038	377.871	858.063	39.3612	390.757	860.653	107.127	311.551	867.808	80.4062	223.697	848.363	107.569	647.92	826.41	519.771	394.665	842.094	480.454	407.022	872.666	414.255	328.854	866.744	437.556	240.614	848.273	421.557
34	0.33	549.963	1263.12	251.922	604.07	1249.77	186.988	587.39	1255.05	321.554	718.689	1121.44	128.88	705.62	1115.89	392.253	613.586	1064.33	255.574	627.432	835.051	-5.35274	377.842	858.038	39.3725	390.742	860.624	107.116	311.542	867.796	80.3952	223.714	848.329	107.535	647.897	826.407	519.737	394.611	842.105	480.435	406.95	872.71	414.234	328.834	866.725	437.534	240.573	848.277	421.544
35	0.34	549.976	1263.08	251.922	604.089	1249.74	186.991	587.358	1255.04	321.585	718.674	1121.43	128.887	705.602	1115.91	392.237	613.584	1064.3	255.554	627.401	834.998	-5.39125	377.835	858.027	39.3614	390.735	860.618	107.104	311.511	867.785	80.3935	223.772	848.298	107.523	647.881	826.401	519.698	394.575	842.109	480.437	406.949	872.726	414.215	328.802	866.716	437.525	240.541	848.27	421.526
36	0.35	549.983	1263.08	251.933	604.087	1249.75	186.994	587.338	1254.99	321.583	718.695	1121.42	128.9	705.617	1115.91	392.231	613.588	1064.3	255.531	627.401	834.954	-5.38377	377.833	858.021	39.3561	390.729	860.628	107.089	311.51	867.793	80.3868	223.778	848.286	107.532	647.891	826.395	519.705	394.596	842.131	480.435	407.023	872.708	414.211	328.817	866.706	437.529	240.553	848.259	421.52
37	0.36	550.015	1263.07	251.932	604.11	1249.75	186.972	587.396	1254.92	321.558	718.726	1121.42	128.888	705.653	1115.9	392.233	613.622	1064.3	255.503	627.37	834.924	-5.3749	377.882	858.005	39.3314	390.741	860.641	107.076	311.516	867.805	80.3624	223.753	848.284	107.512	647.919	826.397	519.694	394.685	842.134	480.439	407.07	872.707	414.224	328.855	866.694	437.511	240.585	848.23	421.513
38	0.37	549.997	1263.09	251.91	604.127	1249.74	186.96	587.438	1254.94	321.529	718.763	1121.4	128.868	705.666	1115.89	392.228	613.63	1064.32	255.479	627.405	834.919	-5.38952	377.867	858.026	39.3327	390.763	860.658	107.053	311.541	867.802	80.3391	223.77	848.296	107.489	647.998	826.398	519.682	394.745	842.127	480.432	407.136	872.704	414.192	328.848	866.702	437.472	240.612	848.226	421.487
39	0.38	549.916	1263.14	251.923	604.095	1249.75	186.975	587.319	1255	321.553	718.783	1121.41	128.886	705.689	1115.91	392.226	613.619	1064.34	255.499	627.415	834.938	-5.36888	377.848	858.059	39.3265	390.783	860.678	107.054	311.55	867.806	80.3633	223.76	848.331	107.502	648.046	826.396	519.665	394.791	842.114	480.427	407.117	872.696	414.196	328.844	866.72	437.477	240.641	848.228	421.5
40	0.39	549.879	1263.18	251.975	604.067	1249.78	187.018	587.277	1255.05	321.599	718.777	1121.41	128.894	705.682	1115.89	392.232	613.567	1064.36	255.56	627.434	834.984	-5.34355	377.896	858.063	39.3262	390.777	860.697	107.085	311.523	867.825	80.3857	223.728	848.372	107.546	648.038	826.366	519.661	394.815	842.088	480.431	407.155	872.648	414.243	328.864	866.745	437.53	240.681	848.246	421.547
41	0.4	549.89	1263.16	252.013	604.037	1249.78	187.064	587.178	1255.09	321.641	718.758	1121.38	128.911	705.684	1115.86	392.241	613.557	1064.33	255.603	627.474	835.039	-5.31507	377.903	858.057	39.3306	390.782	860.675	107.103	311.53	867.824	80.402	223.691	848.398	107.568	648.02	826.332	519.65	394.776	842.057	480.427	407.166	872.61	414.256	328.87	866.742	437.561	240.697	848.255	421.572
42	0.41	549.904	1263.09	252.014	604.055	1249.73	187.064	587.177	1255.05	321.644	718.724	1121.37	128.918	705.672	1115.85	392.254	613.602	1064.28	255.587	627.448	835.049	-5.30367	377.879	858.033	39.349	390.745	860.653	107.085	311.546	867.816	80.404	223.688	848.381	107.562	647.941	826.305	519.673	394.717	842.031	480.444	407.134	872.62	414.242	328.857	866.733	437.557	240.66	848.244	421.56
43	0.42	549.953	1263.01	252.004	604.061	1249.7	187.04	587.241	1254.96	321.622	718.711	1121.36	128.912	705.66	1115.84	392.27	613.688	1064.22	255.577	627.416	835.004	-5.33947	377.835	857.997	39.352	390.744	860.626	107.081	311.566	867.794	80.3925	223.694	848.35	107.529	647.922	826.312	519.708	394.653	842.039	480.455	407.049	872.611	414.27	328.855	866.704	437.538	240.625	848.231	421.547
44	0.43	550.001	1262.95	252.005	604.076	1249.67	187.016	587.339	1254.89	321.623	718.727	1121.37	128.924	705.664	1115.84	392.289	613.756	1064.17	255.572	627.421	834.978	-5.34836	377.863	857.962	39.3501	390.734	860.618	107.088	311.596	867.773	80.382	223.749	848.291	107.516	647.93	826.352	519.727	394.62	842.076	480.464	407.001	872.645	414.272	328.854	866.697	437.534	240.597	848.229	421.542
45	0.44	549.978	1262.93	252	604.079	1249.67	187.02	587.22	1254.87	321.648	718.783	1121.39	128.95	705.697	1115.85	392.293	613.752	1064.17	255.576	627.428	834.957	-5.35999	377.92	857.995	39.3146	390.74	860.604	107.109	311.6	867.775	80.3815	223.762	848.273	107.529	647.873	826.362	519.726	394.63	842.101	480.463	406.987	872.711	414.248	328.837	866.707	437.528	240.588	848.245	421.532
46	0.45	549.916	1262.93	251.971	604.109	1249.69	187.013	587.131	1254.87	321.634	718.802	1121.41	128.947	705.722	1115.85	392.285	613.694	1064.23	255.539	627.431	834.953	-5.36255	377.885	858.028	39.2872	390.75	860.623	107.095	311.578	867.789	80.3617	223.738	848.274	107.517	647.917	826.372	519.721	394.629	842.127	480.431	407.009	872.744	414.2	328.815	866.721	437.501	240.572	848.254	421.501
47	0.46	549.876	1262.96	251.954	604.102	1249.71	187.023	587.166	1254.89	321.618	718.84	1121.41	128.926	705.756	1115.86	392.289	613.679	1064.26	255.515	627.441	834.933	-5.35946	377.898	858.041	39.2633	390.748	860.648	107.07	311.569	867.801	80.3344	223.763	848.269	107.471	647.966	826.406	519.734	394.651	842.147	480.401	407.02	872.745	414.188	328.81	866.737	437.453	240.562	848.265	421.474
48	0.47	549.882	1262.99	251.992	604.084	1249.72	187.04	587.09	1254.92	321.653	718.867	1121.41	128.94	705.776	1115.86	392.284	613.699	1064.29	255.551	627.448	834.94	-5.345	377.88	858.074	39.2908	390.756	860.659	107.055	311.579	867.816	80.3257	223.77	848.312	107.464	647.979	826.414	519.76	394.714	842.14	480.404	407.051	872.736	414.222	328.816	866.751	437.455	240.593	848.273	421.474
49	0.48	549.816	1263.03	252.061	604.052	1249.74	187.097	586.93	1255.02	321.72	718.878	1121.39	128.968	705.762	1115.84	392.304	613.659	1064.32	255.612	627.48	834.987	-5.3157	377.855	858.1	39.3232	390.775	860.677	107.058	311.539	867.836	80.3448	223.754	848.347	107.492	647.953	826.374	519.767	394.76	842.12	480.424	407.109	872.717	414.216	328.824	866.762	437.5	240.623	848.275	421.508
50	0.49	549.757	1263.06	252.11	604.004	1249.77	187.144	586.899	1255.09	321.765	718.846	1121.37	128.974	705.749	1115.82	392.322	613.603	1064.34	255.665	627.496	835.035	-5.29457	377.838	858.092	39.3394	390.751	860.699	107.091	311.523	867.826	80.3541	223.742	848.377	107.522	647.908	826.31	519.749	394.739	842.091	480.433	407.126	872.677	414.192	328.833	866.757	437.544	240.615	848.286	421.542
51	0.5	549.786	1263.02	252.14	603.975	1249.77	187.182	586.915	1255.06	321.805	718.844	1121.36	128.993	705.754	1115.79	392.334	613.673	1064.3	255.698	627.506	835.038	-5.28522	377.837	858.08	39.354	390.744	860.687	107.094	311.53	867.815	80.3695	223.727	848.386	107.539	647.903	826.27	519.747	394.731	842.055	480.44	407.131	872.637	414.211	328.847	866.724	437.567	240.647	848.261	421.561
52	0.51	549.861	1262.96	252.163	603.975	1249.73	187.169	586.991	1254.99	321.828	718.853	1121.33	129.018	705.781	1115.78	392.367	613.819	1064.2	255.705	627.499	835.007	-5.25485	377.858	858.051	39.343	390.756	860.659	107.087	311.547	867.81	80.3568	223.71	848.354	107.532	647.949	826.263	519.78	394.717	842.047	480.446	407.148	872.602	414.236	328.889	866.691	437.563	240.683	848.216	421.559
53	0.52	549.942	1262.9	252.165	604.012	1249.71	187.165	587.051	1254.92	321.818	718.877	1121.32	129.024	705.803	1115.78	392.397	613.878	1064.15	255.71	627.493	834.991	-5.24434	377.893	858.013	39.3244	390.744	860.632	107.079	311.579	867.791	80.3404	223.73	848.303	107.504	647.952	826.254	519.787	394.724	842.048	480.466	407.153	872.574	414.271	328.905	866.674	437.535	240.686	848.186	421.555
54	0.53	549.967	1262.89	252.167	604.043	1249.71	187.183	587.097	1254.9	321.809	718.874	1121.31	129.028	705.836	1115.78	392.411	613.874	1064.14	255.731	627.475	834.944	-5.24194	377.927	858.002	39.2923	390.73	860.633	107.075	311.585	867.785	80.3202	223.767	848.281	107.478	647.941	826.271	519.784	394.711	842.08	480.456	407.113	872.629	414.27	328.892	866.669	437.517	240.66	848.179	421.537
55	0.54	549.951	1262.93	252.192	604.089	1249.73	187.224	587.085	1254.93	321.839	718.876	1121.33	129.046	705.868	1115.78	392.419	613.895	1064.12	255.742	627.481	834.895	-5.23332	377.888	858.02	39.316	390.75	860.641	107.071	311.584	867.792	80.3126	223.782	848.29	107.476	647.945	826.284	519.763	394.704	842.117	480.437	407.092	872.65	414.259	328.869	866.7	437.514	240.627	848.21	421.522
56	0.55	549.961	1262.95	252.23	604.112	1249.74	187.25	587.047	1254.97	321.855	718.886	1121.34	129.062	705.867	1115.79	392.42	613.898	1064.14	255.743	627.51	834.92	-5.22699	377.874	858.014	39.3419	390.783	860.66	107.074	311.589	867.801	80.3084	223.771	848.318	107.482	647.944	826.293	519.766	394.705	842.139	480.44	407.051	872.697	414.233	328.865	866.722	437.499	240.616	848.249	421.511
57	0.56	549.952	1262.97	252.254	604.087	1249.75	187.265	587.093	1254.98	321.863	718.867	1121.33	129.068	705.865	1115.76	392.424	613.879	1064.16	255.732	627.513	834.961	-5.19566	377.864	858.032	39.3196	390.762	860.666	107.061	311.551	867.82	80.2925	223.76	848.322	107.471	647.92	826.288	519.766	394.676	842.139	480.419	407.069	872.694	414.217	328.848	866.735	437.48	240.604	848.275	421.495
58	0.57	549.917	1263.01	252.289	604.083	1249.77	187.278	587.086	1255.01	321.904	718.894	1121.32	129.073	705.9	1115.73	392.443	613.861	1064.17	255.729	627.537	834.985	-5.20261	377.851	858.06	39.2969	390.748	860.665	107.058	311.559	867.818	80.2969	223.771	848.332	107.482	647.844	826.26	519.756	394.64	842.132	480.4	407.035	872.686	414.217	328.829	866.749	437.48	240.594	848.284	421.491
59	0.58	549.916	1263.05	252.355	604.104	1249.8	187.321	587.149	1255	321.95	718.915	1121.31	129.079	705.902	1115.72	392.459	613.839	1064.21	255.77	627.579	835.019	-5.20882	377.865	858.054	39.3237	390.754	860.672	107.088	311.591	867.806	80.325	223.734	848.376	107.517	647.819	826.243	519.765	394.655	842.127	480.401	407.03	872.679	414.228	328.815	866.759	437.498	240.598	848.293	421.51
60	0.59	549.918	1263.07	252.419	604.096	1249.81	187.371	587.172	1255	322.011	718.961	1121.3	129.083	705.901	1115.72	392.489	613.841	1064.23	255.811	627.584	835.031	-5.21029	377.851	858.069	39.3318	390.761	860.684	107.102	311.57	867.813	80.3376	223.717	848.396	107.527	647.832	826.224	519.78	394.668	842.123	480.421	407.054	872.685	414.221	328.816	866.766	437.514	240.61	848.302	421.535
61	0.6	549.967	1263.06	252.456	604.121	1249.82	187.393	587.181	1255.01	322.053	718.971	1121.31	129.1	705.924	1115.71	392.492	613.896	1064.24	255.797	627.542	835.009	-5.20038	377.846	858.083	39.3202	390.743	860.687	107.081	311.592	867.808	80.3276	223.739	848.363	107.502	647.868	826.228	519.787	394.69	842.121	480.433	407.081	872.691	414.226	328.824	866.765	437.51	240.631	848.287	421.531
62	0.61	549.985	1263.08	252.475	604.184	1249.84	187.407	587.23	1254.98	322.056	719.015	1121.31	129.099	706.013	1115.7	392.484	613.962	1064.21	255.784	627.493	834.983	-5.18958	377.85	858.082	39.3071	390.749	860.68	107.057	311.614	867.81	80.2994	223.765	848.329	107.477	647.942	826.242	519.796	394.738	842.114	480.424	407.152	872.674	414.235	328.836	866.737	437.49	240.653	848.259	421.505
63	0.62	550.029	1263.08	252.525	604.2	1249.85	187.441	587.25	1254.99	322.084	719.06	1121.3	129.115	706.08	1115.71	392.497	613.982	1064.2	255.819	627.5	834.971	-5.20591	377.921	858.069	39.3006	390.748	860.689	107.051	311.599	867.81	80.3042	223.755	848.337	107.471	647.989	826.23	519.799	394.803	842.116	480.416	407.219	872.659	414.25	328.882	866.728	437.495	240.674	848.233	421.501
64	0.63	550.067	1263.07	252.602	604.164	1249.87	187.492	587.288	1254.98	322.118	719.084	1121.29	129.135	706.092	1115.71	392.51	614.013	1064.2	255.864	627.491	834.955	-5.22018	377.894	858.079	39.3212	390.761	860.683	107.06	311.584	867.814	80.3033	223.754	848.347	107.485	647.953	826.213	519.793	394.794	842.124	480.45	407.22	872.644	414.258	328.877	866.729	437.507	240.673	848.234	421.517
65	0.64	550.118	1263.07	252.675	604.142	1249.87	187.534	587.349	1254.97	322.144	719.073	1121.25	129.142	706.108	1115.69	392.539	614.101	1064.18	255.897	627.505	834.962	-5.20155	377.903	858.072	39.3355	390.773	860.664	107.086	311.607	867.801	80.3057	223.782	848.349	107.502	647.915	826.198	519.802	394.76	842.112	480.46	407.177	872.618	414.265	328.84	866.719	437.532	240.697	848.222	421.537
66	0.65	550.206	1263.01	252.74	604.151	1249.85	187.55	587.435	1254.91	322.191	719.044	1121.22	129.143	706.133	1115.65	392.559	614.18	1064.12	255.922	627.543	834.968	-5.18494	377.905	858.014	39.3166	390.769	860.628	107.083	311.615	867.769	80.3077	223.797	848.324	107.473	647.889	826.172	519.814	394.726	842.093	480.436	407.08	872.623	414.263	328.834	866.699	437.524	240.691	848.212	421.531
67	0.66	550.263	1262.96	252.81	604.174	1249.83	187.576	587.517	1254.88	322.245	719.033	1121.21	129.138	706.147	1115.63	392.562	614.248	1064.08	255.925	627.538	834.93	-5.18913	377.904	857.988	39.2808	390.746	860.603	107.061	311.615	867.769	80.2992	223.8	848.302	107.463	647.9	826.173	519.844	394.689	842.095	480.404	407.065	872.641	414.243	328.856	866.672	437.5	240.661	848.21	421.521
68	0.67	550.262	1262.97	252.866	604.19	1249.84	187.613	587.536	1254.88	322.269	719.008	1121.21	129.135	706.14	1115.62	392.567	614.288	1064.08	255.922	627.517	834.919	-5.17598	377.893	858.002	39.2534	390.734	860.623	107.049	311.601	867.771	80.2815	223.792	848.291	107.455	647.82	826.161	519.83	394.635	842.115	480.397	407.035	872.684	414.231	328.865	866.692	437.486	240.631	848.231	421.514
69	0.68	550.235	1263.04	252.96	604.182	1249.89	187.669	587.544	1254.92	322.308	718.994	1121.24	129.126	706.147	1115.64	392.578	614.26	1064.13	255.947	627.536	834.934	-5.15279	377.863	858.042	39.2562	390.733	860.669	107.035	311.575	867.792	80.2709	223.761	848.321	107.454	647.783	826.156	519.808	394.624	842.145	480.418	407.04	872.733	414.229	328.846	866.729	437.507	240.605	848.282	421.51
70	0.69	550.216	1263.12	253.052	604.201	1249.95	187.736	587.598	1254.95	322.35	719.008	1121.27	129.11	706.194	1115.68	392.595	614.22	1064.19	255.956	627.57	834.94	-5.10738	377.853	858.069	39.2093	390.73	860.732	106.997	311.554	867.831	80.2417	223.726	848.367	107.448	647.87	826.209	519.812	394.668	842.181	480.422	407.009	872.786	414.231	328.821	866.769	437.515	240.604	848.324	421.503
71	0.7	550.202	1263.17	253.107	604.202	1249.97	187.805	587.638	1254.95	322.384	718.966	1121.26	129.081	706.256	1115.68	392.593	614.267	1064.24	255.969	627.587	834.929	-5.08156	377.812	858.074	39.1048	390.717	860.822	106.919	311.551	867.867	80.1443	223.699	848.386	107.4	647.88	826.23	519.8	394.72	842.205	480.4	407.065	872.788	414.213	328.843	866.794	437.482	240.619	848.33	421.486
72	0.71	550.263	1263.16	253.183	604.221	1249.96	187.846	587.699	1254.96	322.447	718.895	1121.23	129.013	706.291	1115.66	392.61	614.328	1064.24	255.993	627.56	834.863	-5.03727	377.784	858.046	38.9801	390.679	860.952	106.825	311.55	867.88	80.0089	223.65	848.408	107.338	647.889	826.209	519.805	394.754	842.183	480.394	407.081	872.759	414.186	328.857	866.79	437.454	240.65	848.313	421.477
73	0.72	550.381	1263.13	253.318	604.261	1249.95	187.942	587.82	1254.93	322.527	718.83	1121.21	128.958	706.364	1115.66	392.642	614.366	1064.25	256.063	627.563	834.812	-4.92643	377.776	858.006	38.8537	390.622	861.11	106.732	311.527	867.899	79.8911	223.59	848.428	107.245	647.924	826.175	519.813	394.781	842.147	480.408	407.168	872.694	414.176	328.884	866.774	437.474	240.694	848.279	421.496
74	0.73	550.451	1263.1	253.481	604.316	1249.93	188.077	587.88	1254.89	322.636	718.691	1121.2	128.877	706.426	1115.65	392.672	614.369	1064.24	256.152	627.567	834.774	-4.78226	377.745	857.957	38.7595	390.563	861.331	106.641	311.495	867.936	79.7518	223.491	848.486	107.12	647.922	826.172	519.828	394.779	842.098	480.43	407.207	872.621	414.194	328.887	866.746	437.515	240.7	848.257	421.528
75	0.74	550.547	1263.04	253.641	604.309	1249.9	188.194	587.943	1254.81	322.748	718.519	1121.2	128.753	706.433	1115.66	392.696	614.376	1064.2	256.197	627.553	834.641	-4.59599	377.729	857.943	38.6039	390.546	861.618	106.516	311.456	868.004	79.5316	223.431	848.533	106.899	647.902	826.194	519.842	394.739	842.064	480.434	407.17	872.551	414.228	328.857	866.707	437.535	240.71	848.22	421.529
76	0.75	550.665	1262.97	253.786	604.345	1249.88	188.295	588.148	1254.76	322.845	718.333	1121.19	128.636	706.455	1115.68	392.704	614.381	1064.13	256.211	627.559	834.471	-4.32573	377.748	857.978	38.3854	390.532	862.012	106.355	311.469	868.116	79.2309	223.427	848.625	106.561	647.851	826.239	519.859	394.689	842.066	480.432	407.133	872.554	414.24	328.86	866.667	437.505	240.675	848.196	421.507
77	0.76	550.771	1262.96	253.958	604.409	1249.89	188.436	588.291	1254.73	322.994	718.155	1121.19	128.565	706.475	1115.74	392.716	614.352	1064.06	256.215	627.531	834.277	-3.95403	377.689	858.084	38.2058	390.521	862.536	106.187	311.405	868.313	78.8903	223.419	848.836	106.097	647.891	826.317	519.907	394.682	842.095	480.416	407.135	872.589	414.217	328.851	866.666	437.483	240.664	848.194	421.485
78	0.77	550.848	1263.01	254.158	604.47	1249.95	188.586	588.382	1254.75	323.144	718.062	1121.18	128.526	706.496	1115.82	392.738	614.278	1064.06	256.217	627.408	834.035	-3.48694	377.548	858.282	37.988	390.364	863.191	105.993	311.227	868.613	78.4984	223.431	849.2	105.397	647.921	826.433	519.967	394.691	842.144	480.423	407.113	872.629	414.216	328.865	866.688	437.476	240.631	848.218	421.476
79	0.78	550.874	1263.13	254.333	604.534	1250.03	188.724	588.448	1254.87	323.263	717.968	1121.14	128.527	706.485	1115.89	392.748	614.175	1064.09	256.189	627.33	833.782	-2.99286	377.322	858.488	37.6666	390.263	863.991	105.67	310.974	869.096	77.9205	223.407	849.696	104.393	647.892	826.536	519.998	394.686	842.18	480.423	407.052	872.693	414.193	328.817	866.738	437.471	240.589	848.268	421.464
80	0.79	550.9	1263.27	254.459	604.563	1250.11	188.862	588.51	1254.96	323.369	717.876	1121.07	128.571	706.431	1115.95	392.772	614.002	1064.12	256.172	627.326	833.431	-2.5377	377.051	858.651	37.2561	390.307	865.169	105.061	310.778	869.717	77.1025	223.254	850.191	103.119	647.867	826.63	520.028	394.624	842.199	480.418	407.008	872.745	414.177	328.807	866.774	437.451	240.562	848.315	421.446
81	0.8	550.932	1263.4	254.582	604.542	1250.2	188.979	588.496	1255.04	323.491	717.773	1120.97	128.64	706.414	1116.01	392.819	613.85	1064.16	256.209	627.218	832.881	-2.06211	376.876	858.916	36.7932	390.2	866.742	104.347	310.641	870.463	76.1316	222.992	850.698	101.641	647.869	826.698	520.067	394.586	842.211	480.432	406.977	872.778	414.208	328.837	866.795	437.455	240.569	848.356	421.455
82	0.81	550.94	1263.52	254.7	604.562	1250.29	189.098	588.526	1255.14	323.6	717.579	1120.81	128.711	706.369	1116.08	392.901	613.677	1064.18	256.281	627.156	832.213	-1.53999	376.555	859.359	36.0286	390.122	868.501	103.661	310.308	871.488	74.9407	222.702	851.403	100.182	647.86	826.728	520.116	394.57	842.181	480.459	406.996	872.751	414.228	328.847	866.803	437.496	240.597	848.369	421.487
83	0.82	550.871	1263.66	254.787	604.577	1250.34	189.215	588.624	1255.23	323.686	717.279	1120.63	128.696	706.312	1116.15	392.973	613.412	1064.2	256.379	627.493	831.44	-0.99484	376.06	859.962	34.9135	390.116	870.409	102.965	309.855	872.975	73.6046	222.615	852.814	98.7957	647.839	826.726	520.157	394.599	842.129	480.482	407.019	872.686	414.256	328.84	866.803	437.527	240.618	848.372	421.516
84	0.83	550.845	1263.76	254.839	604.567	1250.36	189.27	588.576	1255.31	323.778	716.962	1120.46	128.62	706.241	1116.21	393.015	613.123	1064.16	256.465	628.139	830.507	-0.38569	376.038	860.535	34.0661	390.141	872.384	102.149	309.732	874.867	72.3277	222.579	855.792	97.4266	647.831	826.714	520.165	394.623	842.082	480.474	407.057	872.631	414.248	328.845	866.771	437.523	240.629	848.336	421.505
85	0.84	550.896	1263.83	254.845	604.569	1250.36	189.296	588.607	1255.34	323.829	716.639	1120.31	128.543	706.134	1116.26	393.048	612.954	1064.03	256.536	628.339	829.813	0.15614	376.105	861.099	33.3368	390.432	874.764	101.151	309.884	876.956	70.7285	222.374	860.901	96.0894	647.888	826.73	520.213	394.663	842.047	480.486	407.11	872.6	414.256	328.904	866.711	437.498	240.69	848.263	421.475
86	0.85	550.911	1263.89	254.832	604.585	1250.37	189.312	588.649	1255.38	323.844	716.305	1120.2	128.473	706.001	1116.35	393.083	612.787	1063.88	256.589	628.475	829.021	0.64855	376.284	861.655	32.9419	390.777	877.74	100.145	310.733	879.71	69.2143	222.574	866.837	94.4595	647.932	826.8	520.265	394.658	842.04	480.506	407.155	872.593	414.275	328.94	866.672	437.468	240.748	848.21	421.447
87	0.86	550.876	1264	254.805	604.531	1250.44	189.313	588.528	1255.45	323.84	715.89	1120.08	128.397	705.801	1116.44	393.119	612.469	1063.8	256.635	628.471	828.372	1.11821	376.589	862.496	32.9369	391.441	881.57	99.2657	312.274	883.44	68.3393	222.855	872.913	93.1425	647.929	826.869	520.284	394.65	842.035	480.494	407.172	872.57	414.269	328.913	866.656	437.447	240.697	848.219	421.414
88	0.87	550.762	1264.15	254.77	604.427	1250.52	189.299	588.403	1255.53	323.79	715.462	1119.95	128.318	705.539	1116.54	393.124	612.122	1063.76	256.688	628.435	827.858	1.51209	376.746	863.848	33.3081	392.492	885.906	98.6315	312.77	887.34	67.57	223.48	879.13	92.3957	647.911	826.95	520.344	394.593	842.051	480.481	407.111	872.598	414.246	328.878	866.672	437.438	240.651	848.243	421.39
89	0.88	550.631	1264.32	254.726	604.273	1250.59	189.28	588.198	1255.62	323.742	715.115	1119.85	128.246	705.292	1116.65	393.123	611.801	1063.71	256.753	628.779	827.062	1.77622	376.759	866.244	34.0856	393.76	890.655	98.238	313.127	891.748	67.3496	224.33	885.487	92.4078	647.94	827.059	520.429	394.532	842.052	480.499	407.038	872.649	414.236	328.892	866.698	437.441	240.634	848.28	421.395
90	0.89	550.47	1264.46	254.643	604.142	1250.66	189.218	587.931	1255.67	323.647	714.781	1119.74	128.176	705.028	1116.74	393.097	611.462	1063.67	256.813	628.743	826.426	2.02843	377.551	869.976	35.0152	395.352	895.655	98.0555	314.699	896.742	68.199	225.638	892.385	93.5915	647.921	827.174	520.531	394.477	842.041	480.511	407.023	872.669	414.234	328.867	866.72	437.453	240.609	848.313	421.409
91	0.9	550.255	1264.57	254.505	603.974	1250.73	189.116	587.617	1255.71	323.515	714.473	1119.63	128.107	704.741	1116.85	393.019	611.158	1063.65	256.825	628.559	826.001	2.16363	378.29	873.946	35.9481	397.223	900.705	98.2009	315.775	902.181	69.4168	227.284	900.227	96.1529	647.951	827.29	520.609	394.423	842.04	480.514	406.992	872.653	414.23	328.796	866.759	437.439	240.551	848.362	421.395
92	0.91	549.998	1264.64	254.312	603.808	1250.77	188.97	587.284	1255.71	323.37	714.249	1119.53	128.036	704.514	1116.98	392.927	610.925	1063.61	256.791	628.274	825.695	2.13129	378.925	878.182	37.2396	399.313	906.025	98.5507	316.978	908.143	71.2375	229.339	908.877	99.8382	647.942	827.405	520.68	394.368	842.047	480.517	406.956	872.626	414.247	328.778	866.762	437.43	240.528	848.377	421.384
93	0.92	549.768	1264.67	254.071	603.64	1250.78	188.777	587.038	1255.66	323.202	714.113	1119.45	127.99	704.258	1117.12	392.854	610.796	1063.56	256.745	627.818	825.452	1.94408	379.477	882.736	38.723	401.654	911.704	99.0663	318.575	914.484	73.6083	232.158	917.817	104.107	647.909	827.55	520.79	394.358	842.05	480.54	407.021	872.598	414.243	328.785	866.744	437.424	240.519	848.365	421.381
94	0.93	549.522	1264.64	253.773	603.471	1250.77	188.568	586.699	1255.62	322.976	714.068	1119.36	127.941	704.019	1117.24	392.776	610.73	1063.48	256.665	627.24	825.304	1.52365	379.992	887.625	40.6496	404.196	917.679	99.6989	320.481	921.132	76.3746	235.419	927.146	108.71	647.893	827.69	520.884	394.374	842.048	480.566	407.044	872.601	414.236	328.813	866.721	437.412	240.513	848.343	421.368
95	0.94	549.181	1264.57	253.384	603.355	1250.76	188.333	586.33	1255.59	322.715	714.056	1119.29	127.891	703.807	1117.32	392.686	610.655	1063.41	256.543	626.341	825.43	0.94298	380.577	892.545	42.8571	406.902	924.066	100.397	322.413	927.981	79.2112	238.772	936.798	113.567	647.897	827.799	520.976	394.383	842.038	480.547	407.055	872.588	414.23	328.799	866.712	437.367	240.532	848.305	421.328
96	0.95	548.872	1264.47	252.996	603.277	1250.71	188.016	586.081	1255.52	322.433	714.12	1119.24	127.852	703.671	1117.37	392.629	610.632	1063.35	256.452	625.127	825.937	0.30964	381.573	897.641	45.369	409.662	930.867	101.082	324.485	935.19	82.0569	242.233	946.73	118.608	647.936	827.917	521.063	394.397	841.999	480.522	407.151	872.528	414.231	328.806	866.685	437.336	240.549	848.287	421.293
97	0.96	548.616	1264.31	252.642	603.164	1250.65	187.768	585.784	1255.43	322.206	714.209	1119.2	127.868	703.594	1117.4	392.604	610.63	1063.33	256.43	624.047	826.393	-0.4089	382.859	903.098	48.2798	412.838	937.845	101.605	326.9	942.495	85.3671	246.081	956.896	124.164	647.984	828.023	521.169	394.427	841.976	480.539	407.21	872.473	414.233	328.842	866.669	437.36	240.573	848.259	421.301
98	0.97	548.369	1264.11	252.329	603.062	1250.55	187.615	585.43	1255.31	321.97	714.262	1119.17	127.92	703.559	1117.42	392.599	610.62	1063.33	256.444	622.79	826.947	-1.18944	383.414	908.46	51.2801	416.299	945.186	102.007	329.456	949.933	88.925	250.717	967.25	130.075	647.958	828.072	521.247	394.404	841.952	480.571	407.182	872.424	414.253	328.858	866.663	437.395	240.563	848.263	421.329
99	0.98	548.117	1263.89	252.018	602.949	1250.45	187.417	585.025	1255.17	321.656	714.375	1119.16	127.947	703.539	1117.44	392.597	610.611	1063.32	256.437	621.507	827.495	-1.9406	384.554	914.132	54.5243	419.93	952.693	102.203	332.293	957.505	92.7272	256.105	978.111	136.017	647.84	828.068	521.243	394.337	841.948	480.563	407.069	872.467	414.246	328.845	866.656	437.378	240.507	848.286	421.324
100	0.99	547.912	1263.65	251.698	602.874	1250.33	187.191	584.656	1255.03	321.313	714.459	1119.18	127.98	703.545	1117.43	392.578	610.636	1063.28	256.422	620.173	828.04	-2.64467	386.094	919.748	58.1609	423.321	960.001	102.493	335.584	965.226	96.6449	261.967	989.588	141.817	647.779	828.084	521.24	394.262	841.97	480.528	406.973	872.509	414.246	328.81	866.655	437.342	240.465	848.294	421.304
101	1	547.777	1263.42	251.399	602.855	1250.21	186.98	584.448	1254.81	320.982	714.562	1119.25	128.046	703.641	1117.44	392.565	610.707	1063.26	256.422	618.632	828.73	-3.35282	388.226	925.659	62.2569	426.616	966.758	102.899	338.994	973.37	100.538	267.762	1001.02	147.71	647.767	828.097	521.223	394.251	841.992	480.513	406.956	872.522	414.213	328.788	866.666	437.316	240.44	848.314	421.293
102	1.01	547.62	1263.23	251.094	602.738	1250.13	186.779	584.324	1254.6	320.698	714.678	1119.35	128.134	703.779	1117.44	392.568	610.731	1063.32	256.446	617.022	829.587	-4.08133	390.072	931.431	66.0706	430.337	973.485	103.456	343.132	981.658	104.775	273.99	1012.01	153.736	647.787	828.083	521.134	394.266	842.037	480.525	407.001	872.559	414.19	328.794	866.707	437.337	240.438	848.346	421.322
103	1.02	547.378	1263.11	250.725	602.59	1250.09	186.55	583.999	1254.47	320.404	714.822	1119.46	128.229	703.923	1117.44	392.555	610.726	1063.44	256.428	615.413	830.508	-4.82584	391.887	937.433	69.9796	434.261	980.083	104.041	348.327	989.215	109.46	280.361	1022.79	159.673	647.809	828.036	521.026	394.284	842.076	480.521	407.003	872.575	414.199	328.76	866.751	437.358	240.443	848.369	421.337
104	1.03	547.187	1262.94	250.331	602.507	1250.02	186.3	583.694	1254.35	320.131	714.997	1119.57	128.336	704.068	1117.41	392.524	610.864	1063.51	256.371	613.732	831.566	-5.54067	393.591	943.42	73.9564	438.048	986.432	104.565	351.978	996.817	112.823	286.687	1033.63	164.936	647.836	827.951	520.885	394.355	842.064	480.513	407.027	872.574	414.156	328.754	866.749	437.354	240.45	848.37	421.354
105	1.04	547.076	1262.72	249.945	602.472	1249.89	186.059	583.591	1254.17	319.871	715.172	1119.65	128.469	704.272	1117.35	392.522	611.126	1063.48	256.31	611.973	832.677	-6.35531	395.244	949.046	78.0983	441.731	992.56	104.947	356.392	1004.23	116.721	295.241	1044.22	170.717	647.955	827.85	520.726	394.441	842.039	480.501	407.098	872.558	414.143	328.821	866.734	437.363	240.515	848.329	421.37
106	1.05	546.956	1262.52	249.609	602.412	1249.75	185.871	583.429	1254.02	319.675	715.367	1119.71	128.62	704.483	1117.29	392.534	611.317	1063.47	256.319	610.161	833.912	-7.1613	397.35	954.622	82.1491	445.458	998.519	105.434	361.08	1011.27	121.207	303.516	1054.22	175.915	648.052	827.732	520.574	394.504	841.988	480.502	407.131	872.509	414.175	328.873	866.721	437.388	240.605	848.274	421.396
107	1.06	546.764	1262.37	249.331	602.367	1249.6	185.711	583.19	1253.87	319.474	715.524	1119.77	128.766	704.703	1117.21	392.567	611.393	1063.45	256.374	608.378	835.168	-7.88566	399.513	960.11	86.1077	449.143	1004.21	105.98	365.687	1018.12	125.085	311.252	1063.75	180.54	648.063	827.599	520.427	394.522	841.961	480.509	407.152	872.487	414.187	328.904	866.695	437.418	240.61	848.257	421.444
108	1.07	546.64	1262.23	249.098	602.403	1249.49	185.57	582.965	1253.71	319.311	715.68	1119.84	128.892	704.935	1117.14	392.593	611.425	1063.43	256.458	606.509	836.476	-8.6699	401.71	965.457	89.971	452.786	1009.54	106.368	370.224	1024.77	128.801	318.787	1072.77	184.907	648.073	827.498	520.276	394.549	841.958	480.51	407.166	872.458	414.203	328.913	866.678	437.449	240.616	848.258	421.483
109	1.08	546.621	1262.1	248.88	602.467	1249.41	185.444	582.828	1253.57	319.172	715.866	1119.95	129.028	705.159	1117.09	392.604	611.562	1063.4	256.507	604.603	837.635	-9.37118	404.071	970.637	93.6873	456.368	1014.48	106.614	374.97	1031.07	132.329	326.252	1081.23	189.006	648.156	827.417	520.145	394.623	841.95	480.51	407.221	872.447	414.186	328.951	866.677	437.455	240.671	848.237	421.492
110	1.09	546.635	1261.98	248.693	602.567	1249.36	185.338	583.488	1253.3	318.862	716.039	1120.04	129.158	705.419	1117.03	392.63	611.708	1063.39	256.523	602.527	838.822	-9.90899	406.563	975.646	97.2737	459.555	1019.35	106.82	379.671	1036.96	135.701	333.684	1089.35	192.656	648.207	827.342	520.012	394.673	841.96	480.502	407.242	872.492	414.167	328.974	866.688	437.473	240.702	848.235	421.485
111	1.1	546.603	1261.91	248.551	602.638	1249.37	185.273	584.322	1253.03	318.536	716.18	1120.16	129.294	705.664	1116.99	392.641	611.784	1063.43	256.536	600.49	839.895	-10.3046	409.646	980.159	101.058	462.257	1024.15	107.138	384.342	1042.61	138.903	341.037	1097.19	195.858	648.202	827.279	519.85	394.678	842.002	480.496	407.163	872.565	414.169	328.955	866.722	437.469	240.654	848.283	421.485
112	1.11	546.555	1261.88	248.465	602.702	1249.41	185.251	582.959	1253.28	318.786	716.36	1120.27	129.467	705.886	1116.96	392.644	611.82	1063.49	256.59	598.441	841.061	-10.6884	413.754	983.963	104.838	465.571	1028.12	107.483	388.969	1047.92	141.938	348.378	1104.66	198.613	648.218	827.247	519.739	394.68	842.031	480.504	407.061	872.637	414.157	328.928	866.772	437.489	240.636	848.325	421.501
113	1.12	546.575	1261.86	248.413	602.812	1249.48	185.251	582.626	1253.28	318.842	716.554	1120.33	129.648	706.118	1116.9	392.646	611.915	1063.52	256.648	596.767	842.17	-11.1316	417.733	987.736	107.896	469.006	1031.73	107.796	393.51	1052.89	144.85	355.691	1111.64	201.002	648.26	827.209	519.651	394.715	842.041	480.497	407.115	872.637	414.145	328.948	866.794	437.527	240.663	848.355	421.521
114	1.13	546.636	1261.83	248.364	602.956	1249.53	185.265	582.523	1253.22	318.839	716.717	1120.37	129.822	706.298	1116.84	392.636	611.959	1063.52	256.684	595.2	843.361	-11.5156	421.675	991.389	110.702	472.155	1035.02	108.295	398.083	1057.52	147.582	362.631	1118.04	203.219	648.292	827.14	519.55	394.733	842.026	480.488	407.123	872.635	414.149	328.974	866.798	437.533	240.687	848.352	421.538
115	1.14	546.691	1261.81	248.323	603.083	1249.57	185.277	582.493	1253.16	318.8	716.872	1120.39	129.997	706.454	1116.78	392.634	611.935	1063.52	256.697	593.659	844.536	-11.8791	423.436	995.485	113.856	475.258	1038.08	108.807	402.487	1061.93	150.174	369.139	1123.92	205.42	648.286	827.073	519.467	394.75	841.986	480.5	407.106	872.583	414.171	328.966	866.784	437.541	240.69	848.332	421.553
116	1.15	546.75	1261.81	248.292	603.23	1249.64	185.324	582.43	1253.13	318.775	717.019	1120.37	130.166	706.58	1116.74	392.655	612.016	1063.5	256.685	592.188	845.637	-12.2493	425.886	999.109	116.461	478.267	1041.04	109.476	406.858	1066.02	152.511	375.471	1129.22	207.437	648.283	827.018	519.427	394.779	841.951	480.525	407.128	872.551	414.181	328.968	866.757	437.565	240.702	848.298	421.551
117	1.16	546.861	1261.8	248.274	603.425	1249.74	185.361	582.473	1253.07	318.781	717.204	1120.37	130.341	706.74	1116.72	392.68	612.172	1063.46	256.669	590.783	846.611	-12.543	428.327	1002.5	118.842	481.555	1043.62	110.554	410.975	1069.92	154.554	381.777	1134.1	209.396	648.346	827.014	519.424	394.82	841.937	480.526	407.221	872.525	414.169	328.979	866.73	437.581	240.734	848.269	421.561
118	1.17	546.968	1261.81	248.256	603.622	1249.85	185.403	582.526	1253.01	318.785	717.392	1120.37	130.52	706.849	1116.73	392.704	612.367	1063.58	256.617	589.377	847.52	-12.8336	430.668	1005.73	121.057	485.021	1045.76	111.695	414.96	1073.53	156.378	387.852	1138.62	211.183	648.382	827.061	519.455	394.828	841.94	480.523	407.263	872.492	414.161	328.998	866.703	437.559	240.771	848.234	421.548
119	1.18	547.102	1261.84	248.234	603.865	1249.97	185.425	582.609	1252.96	318.811	717.544	1120.37	130.706	706.923	1116.73	392.744	613.015	1063.83	256.542	587.9	848.411	-12.9677	433.167	1008.72	123.022	486.802	1048.4	111.455	419.068	1076.81	158.281	393.559	1142.68	212.798	648.359	827.114	519.519	394.83	841.937	480.524	407.248	872.496	414.18	329.009	866.688	437.519	240.771	848.208	421.519
120	1.19	547.235	1261.88	248.26	604.096	1250.09	185.485	582.655	1252.93	318.82	717.719	1120.37	130.881	706.977	1116.74	392.789	613.905	1063.73	256.532	586.652	849.351	-13.3672	435.847	1011.47	124.791	488.993	1050.69	111.597	422.946	1079.78	159.964	398.863	1146.51	214.322	648.312	827.155	519.599	394.81	841.946	480.537	407.249	872.495	414.201	329.022	866.696	437.511	240.795	848.213	421.513
121	1.2	547.341	1261.93	248.316	604.299	1250.26	185.563	582.728	1252.91	318.908	717.884	1120.36	131.038	707.025	1116.75	392.83				585.715	850.476	-14.1735	438.233	1013.94	126.509	491.429	1052.6	111.847	426.567	1082.54	161.494	404.085	1149.97	215.594	648.339	827.23	519.694	394.78	841.946	480.534	407.226	872.506	414.197	329.052	866.698	437.507	240.776	848.24	421.515
122	1.21	547.371	1262.05	248.397	604.428	1250.4	185.661	582.762	1252.91	318.996	718.011	1120.32	131.209	707.039	1116.75	392.872				584.718	851.422	-14.429	440.398	1016.28	128.165	493.72	1054.3	112.087	429.846	1085.21	162.886	409.136	1153.08	216.727	648.303	827.272	519.81	394.76	841.94	480.537	407.201	872.514	414.195	329.031	866.736	437.522	240.743	848.29	421.52
123	1.22	547.455	1262.13	248.484	604.507	1250.49	185.768	582.827	1252.89	319.073	718.097	1120.28	131.366	707.061	1116.74	392.917				583.824	852.141	-14.4966	442.504	1018.49	129.741	495.798	1056.01	112.33	433.067	1087.59	164.042	413.595	1155.9	217.797	648.217	827.302	519.922	394.675	841.948	480.57	407.151	872.513	414.215	328.983	866.763	437.547	240.703	848.342	421.538
124	1.23	547.524	1262.19	248.56	604.603	1250.6	185.853	582.879	1252.86	319.149	718.215	1120.23	131.516	707.076	1116.75	392.973				583.096	852.708	-14.5155	444.757	1020.37	131.138	497.629	1057.66	112.573	435.906	1089.75	165.191	417.933	1158.51	218.618	648.204	827.37	520.02	394.604	841.948	480.593	407.144	872.487	414.228	328.974	866.765	437.572	240.711	848.363	421.557
125	1.24	547.58	1262.21	248.604	604.726	1250.66	185.907	582.878	1252.83	319.192	718.349	1120.17	131.656	707.114	1116.77	393.009				582.41	853.166	-14.2931	446.8	1022.21	132.375	499.32	1059.11	112.696	438.546	1091.79	166.166	422.064	1160.98	219.301	648.195	827.422	520.116	394.592	841.95	480.577	407.162	872.493	414.222	328.966	866.777	437.548	240.706	848.363	421.539
126	1.25	547.624	1262.23	248.605	604.828	1250.72	185.948	582.902	1252.8	319.203	718.486	1120.12	131.776	707.111	1116.79	393.038	610.02	1063.7	258.818	581.662	853.583	-13.9971	448.829	1023.85	133.607	501.055	1060.34	112.811	441.141	1093.76	166.912	425.953	1163.14	219.918	648.153	827.45	520.174	394.596	841.948	480.58	407.173	872.494	414.228	328.971	866.77	437.505	240.679	848.345	421.488
127	1.26	547.643	1262.24	248.628	604.909	1250.76	185.974	582.957	1252.75	319.208	718.578	1120.08	131.892	707.099	1116.82	393.101	611.22	1063.95	258.333	580.992	854.13	-14.3753	450.897	1025.43	134.751	502.888	1061.45	112.876	443.605	1095.68	167.678	429.816	1165.16	220.499	648.176	827.501	520.254	394.615	841.955	480.597	407.259	872.469	414.233	328.936	866.751	437.48	240.696	848.306	421.451
128	1.27	547.66	1262.24	248.681	604.927	1250.82	186.03	582.931	1252.73	319.257	718.643	1120.03	131.995	707.076	1116.84	393.16	612.271	1064.41	257.973	580.467	854.464	-14.3841	452.705	1026.86	135.86	504.697	1062.42	112.915	446.073	1097.5	168.357	433.414	1167.13	220.982	648.187	827.545	520.34	394.651	841.973	480.61	407.276	872.496	414.238	328.923	866.74	437.467	240.724	848.275	421.428
129	1.28	547.632	1262.25	248.724	604.86	1250.89	186.133	582.918	1252.68	319.294	718.683	1119.97	132.067	707.022	1116.85	393.202	612.562	1064.21	257.883	580.085	854.692	-14.3511	454.422	1028.42	136.97	506.547	1063.42	112.927	448.62	1099.24	168.977	437.217	1169.12	221.324	648.123	827.553	520.39	394.648	841.956	480.587	407.279	872.497	414.221	328.925	866.724	437.447	240.688	848.262	421.404
130	1.29	547.565	1262.27	248.792	604.798	1250.97	186.212	582.86	1252.61	319.341	718.683	1119.91	132.157	706.96	1116.87	393.24	611.59	1063.03	258.22	579.714	854.886	-14.2658	456.384	1029.64	137.821	508.239	1064.32	112.993	451.121	1100.9	169.532	440.793	1171.03	221.702	648.07	827.569	520.457	394.626	841.927	480.58	407.26	872.487	414.208	328.918	866.721	437.434	240.665	848.265	421.392
131	1.3	547.57	1262.26	248.901	604.664	1251.03	186.314	582.826	1252.54	319.432	718.674	1119.85	132.256	706.904	1116.86	393.31	612.257	1062.6	257.948	579.246	855.093	-14.1313	458.468	1030.91	138.742	509.901	1065.21	113.119	453.678	1102.41	170.101	444.528	1172.8	222.113	648.044	827.579	520.55	394.574	841.903	480.612	407.229	872.433	414.268	328.96	866.714	437.473	240.682	848.266	421.414
132	1.31	547.587	1262.24	249	604.513	1251.09	186.418	582.804	1252.46	319.524	718.711	1119.82	132.346	706.831	1116.85	393.357	613.476	1062.35	257.475	578.68	855.358	-13.9908	460.236	1032.13	139.782	511.413	1066.08	113.212	456.094	1103.88	170.766	448.257	1174.36	222.564	647.995	827.569	520.613	394.534	841.883	480.647	407.187	872.407	414.283	328.973	866.703	437.513	240.688	848.274	421.44
133	1.32	547.571	1262.2	249.06	604.461	1251.12	186.475	583.569	1252.13	319.376	718.745	1119.8	132.435	706.746	1116.86	393.386	614.654	1062.21	256.928	578.146	855.663	-13.875	461.971	1033.18	140.722	512.923	1066.96	113.216	458.46	1105.18	171.536	451.845	1175.73	223.189	647.981	827.569	520.655	394.515	841.876	480.642	407.17	872.404	414.261	328.97	866.696	437.503	240.653	848.291	421.427
134	1.33	547.559	1262.15	249.076	604.416	1251.14	186.499	584.549	1251.76	319.161	718.815	1119.77	132.5	706.717	1116.9	393.398	615.668	1062.24	256.398	577.703	855.987	-13.8431	463.777	1034.24	141.613	514.285	1067.94	113.085	460.879	1106.37	172.22	455.598	1176.79	223.751	648.016	827.598	520.677	394.494	841.886	480.62	407.122	872.426	414.259	328.975	866.691	437.463	240.644	848.28	421.404
135	1.34	547.536	1262.11	249.128	604.395	1251.18	186.541	583.275	1252.06	319.543	718.867	1119.72	132.564	706.703	1116.95	393.432	616.737	1062.35	255.894	577.282	856.306	-13.8149	465.373	1035.25	142.405	515.631	1068.7	113.083	463.783	1107.17	172.934	459.12	1177.87	224.489	648.042	827.648	520.725	394.51	841.915	480.626	407.135	872.464	414.3	328.977	866.719	437.452	240.647	848.291	421.387
136	1.35	547.432	1262.09	249.189	604.333	1251.21	186.577	582.865	1252.13	319.649	718.927	1119.7	132.605	706.674	1116.97	393.451	617.987	1062.36	255.29	576.913	856.62	-13.7756	467.234	1036.08	143.072	517.051	1069.42	113.102	467.887	1107.39	173.914	462.73	1179	225.092	648.096	827.698	520.726	394.549	841.955	480.632	407.165	872.532	414.3	328.964	866.762	437.448	240.644	848.333	421.391
137	1.36	547.213	1262.08	249.216	604.223	1251.27	186.627	582.65	1252.14	319.697	718.949	1119.7	132.632	706.655	1116.99	393.442	619.219	1062.32	254.648	576.629	856.908	-13.7349	469.039	1037	143.8	518.399	1070.06	113.092	470.73	1108.18	174.509	466.233	1180.04	225.642	648.087	827.706	520.692	394.564	841.971	480.612	407.22	872.521	414.264	328.949	866.801	437.439	240.626	848.375	421.393
138	1.37	547.065	1262.04	249.237	604.092	1251.28	186.65	582.477	1252.11	319.735	718.953	1119.69	132.657	706.642	1116.98	393.447	619.834	1062.35	254.327	576.414	857.158	-13.6739	470.548	1038.04	144.454	519.734	1070.62	113.044	473.26	1109.21	175.064	469.694	1181.21	226.076	648.026	827.664	520.672	394.551	841.959	480.609	407.194	872.502	414.256	328.926	866.813	437.435	240.62	848.379	421.388
139	1.38	546.998	1261.93	249.292	604.004	1251.27	186.683	582.402	1252.03	319.818	718.96	1119.64	132.67	706.662	1116.96	393.458				576.192	857.344	-13.641	471.939	1038.79	145.05	521.19	1071.15	112.997	475.664	1110.09	175.626	473.264	1182.19	226.433	648.028	827.636	520.684	394.537	841.931	480.629	407.181	872.498	414.285	328.958	866.787	437.465	240.63	848.354	421.412
140	1.39	546.946	1261.8	249.339	603.935	1251.23	186.686	582.385	1251.88	319.881	718.986	1119.6	132.679	706.653	1116.94	393.45				575.919	857.498	-13.6473	473.457	1039.49	145.686	522.683	1071.67	112.974	477.981	1110.84	176.071	476.677	1182.98	226.697	648.016	827.589	520.679	394.554	841.908	480.643	407.189	872.468	414.308	329.005	866.738	437.479	240.647	848.311	421.433
141	1.4	546.83	1261.68	249.344	603.844	1251.19	186.678	582.315	1251.72	319.896	718.978	1119.58	132.678	706.608	1116.93	393.431				575.574	857.662	-13.6997	475.01	1040.29	146.256	524.054	1072.13	112.941	480.272	1111.57	176.479	479.789	1183.63	227.038	647.993	827.572	520.652	394.541	841.889	480.639	407.176	872.427	414.311	328.96	866.714	437.47	240.652	848.263	421.424
142	1.41	546.715	1261.58	249.332	603.733	1251.15	186.667	582.203	1251.57	319.891	718.993	1119.54	132.674	706.607	1116.93	393.404				575.214	857.861	-13.7767	476.505	1041.03	146.822	525.268	1072.52	112.945	482.314	1112.31	176.907	482.569	1184.37	227.432	647.996	827.574	520.635	394.537	841.886	480.62	407.155	872.433	414.314	328.933	866.693	437.462	240.671	848.225	421.403
143	1.42	546.657	1261.47	249.317	603.664	1251.12	186.681	582.074	1251.46	319.926	719.019	1119.52	132.669	706.642	1116.93	393.374				574.894	858.132	-13.8889	478.249	1041.51	147.432	526.398	1072.88	112.947	484.16	1112.98	177.302	485.227	1185.08	227.805	648.033	827.589	520.612	394.572	841.903	480.621	407.168	872.45	414.277	328.965	866.669	437.458	240.674	848.216	421.398
144	1.43	546.549	1261.39	249.292	603.578	1251.13	186.687	581.908	1251.39	319.932	719.08	1119.49	132.659	706.623	1116.93	393.329				574.563	858.423	-13.9995	479.695	1042.08	148.043	527.445	1073.26	112.96	486.052	1113.5	177.612	487.585	1185.77	228.098	648.072	827.612	520.582	394.582	841.924	480.612	407.199	872.461	414.24	328.97	866.684	437.444	240.666	848.245	421.4
145	1.44	546.361	1261.35	249.273	603.47	1251.15	186.666	581.66	1251.36	319.909	719.19	1119.5	132.661	706.566	1116.94	393.278				574.236	858.706	-14.1166	480.827	1042.74	148.57	528.433	1073.66	113.025	487.988	1114.06	177.963	489.788	1186.35	228.175	648.064	827.602	520.538	394.546	841.926	480.579	407.188	872.472	414.218	328.923	866.726	437.438	240.613	848.298	421.398
146	1.45	546.226	1261.31	249.273	603.394	1251.13	186.673	581.358	1251.31	319.94	719.15	1119.49	132.59	706.538	1116.95	393.235	611.902	1062.1	257.827	573.916	859.024	-14.2125	481.974	1043.43	149.113	529.371	1074.04	113.107	489.713	1114.68	178.324	492.153	1186.89	228.272	648.047	827.589	520.489	394.535	841.917	480.586	407.132	872.49	414.246	328.902	866.765	437.459	240.594	848.339	421.421
147	1.46	546.214	1261.21	249.285	603.338	1251.11	186.655	581.25	1251.21	319.974	718.797	1119.4	132.348	706.505	1116.94	393.208	612.611	1061.95	257.491	573.553	859.307	-14.3158	483.151	1043.96	149.66	530.348	1074.4	113.169	491.148	1115.24	178.635	494.224	1187.49	228.465	648.061	827.564	520.469	394.559	841.905	480.596	407.15	872.481	414.255	328.957	866.772	437.502	240.622	848.352	421.464
148	1.47	546.144	1261.11	249.249	603.249	1251.1	186.635	581.216	1251.09	319.944	718.692	1119.37	132.273	706.485	1116.92	393.155	613.313	1061.8	257.119	573.259	859.551	-14.4429	484.179	1044.34	150.077	531.391	1074.75	113.215	492.596	1115.74	178.857	496.192	1188.04	228.557	648.052	827.554	520.443	394.542	841.896	480.611	407.116	872.483	414.258	329.004	866.745	437.496	240.654	848.33	421.461
149	1.48	545.994	1261.04	249.171	603.146	1251.09	186.593	581.039	1251.04	319.879	718.655	1119.36	132.256	706.448	1116.93	393.094	613.73	1061.83	256.809	572.992	859.744	-14.5703	485.223	1044.8	150.316	532.327	1075.06	113.245	494.185	1116.25	179.017	498.219	1188.56	228.675	648.055	827.576	520.423	394.522	841.896	480.594	407.122	872.44	414.246	328.97	866.731	437.456	240.635	848.299	421.43
150	1.49	545.883	1260.99	249.117	603.036	1251.09	186.531	580.848	1251.01	319.835	718.674	1119.35	132.238	706.399	1116.96	393.041	614.067	1061.92	256.556	572.727	859.937	-14.7013	486.301	1045.3	150.467	533.194	1075.3	113.287	495.657	1116.66	179.204	500.049	1189.07	228.912	648.082	827.611	520.387	394.549	841.919	480.585	407.142	872.46	414.213	328.954	866.741	437.43	240.616	848.288	421.412
151	1.5	545.82	1260.95	249.085	602.998	1251.09	186.5	580.834	1250.9	319.764	718.714	1119.34	132.232	706.418	1116.99	393.01	614.291	1062.04	256.394	572.55	860.131	-14.8263	487.296	1045.72	150.602	534.029	1075.45	113.356	497.049	1116.94	179.437	501.614	1189.32	229.216	648.16	827.649	520.367	394.597	841.94	480.589	407.226	872.488	414.228	328.958	866.743	437.438	240.635	848.279	421.42
152	1.51	545.74	1260.91	249.02	602.931	1251.11	186.446	580.72	1250.83	319.69	718.743	1119.34	132.225	706.432	1117.02	392.966	614.398	1062.16	256.244	572.396	860.315	-14.951	488.031	1046.07	150.783	534.791	1075.57	113.418	498.145	1117.15	179.629	503.233	1189.43	229.485	648.208	827.677	520.325	394.622	841.948	480.585	407.268	872.487	414.225	328.964	866.747	437.423	240.636	848.266	421.404
153	1.52	545.63	1260.87	248.937	602.912	1251.1	186.362	580.497	1250.82	319.622	718.754	1119.32	132.193	706.377	1117.03	392.897	614.482	1062.21	256.091	572.217	860.494	-15.0912	488.703	1046.32	151.01	535.525	1075.69	113.483	498.989	1117.37	179.859	504.956	1189.5	229.735	648.24	827.684	520.288	394.608	841.938	480.554	407.21	872.493	414.185	328.965	866.731	437.386	240.622	848.256	421.379
154	1.53	545.612	1260.82	248.885	602.866	1251.08	186.342	580.453	1250.76	319.57	718.761	1119.31	132.151	706.326	1117.03	392.849	614.577	1062.17	256.005	572.08	860.714	-15.2375	489.375	1046.49	151.267	536.203	1075.78	113.58	499.911	1117.58	180.149	506.735	1189.46	230.004	648.274	827.697	520.271	394.594	841.922	480.542	407.24	872.456	414.183	328.965	866.73	437.384	240.635	848.252	421.38
155	1.54	545.566	1260.78	248.87	602.815	1251.06	186.344	580.5	1250.7	319.559	718.753	1119.3	132.125	706.274	1117.03	392.836	614.76	1062.1	255.967	571.976	860.927	-15.3926	489.994	1046.68	151.568	536.83	1075.84	113.689	500.924	1117.73	180.483	508.222	1189.35	230.31	648.206	827.682	520.286	394.592	841.884	480.578	407.247	872.42	414.203	328.959	866.727	437.421	240.651	848.265	421.423
156	1.55	545.5	1260.73	248.844	602.72	1251.05	186.334	580.411	1250.68	319.546	718.726	1119.29	132.094	706.202	1117.02	392.819	614.817	1062.06	255.925	571.86	861.122	-15.5253	490.595	1046.88	151.773	537.396	1075.92	113.768	501.808	1117.85	180.764	509.417	1189.3	230.771	648.126	827.674	520.279	394.564	841.865	480.602	407.203	872.414	414.208	328.935	866.728	437.46	240.63	848.294	421.455
157	1.56	545.445	1260.69	248.79	602.649	1251.03	186.285	580.274	1250.66	319.516	718.733	1119.28	132.056	706.121	1117.04	392.771	614.757	1062.06	255.867	571.725	861.317	-15.6564	491.056	1047.05	151.935	537.89	1075.99	113.836	502.636	1117.98	180.963	510.382	1189.31	231.206	648.062	827.663	520.27	394.512	841.87	480.597	407.106	872.416	414.207	328.899	866.724	437.469	240.581	848.312	421.454
158	1.57	545.429	1260.65	248.718	602.606	1250.98	186.224	580.212	1250.64	319.452	718.711	1119.26	132.021	706.088	1117.08	392.747	614.797	1062.04	255.792	571.647	861.468	-15.7417	491.469	1047.14	152.086	538.422	1076.04	113.903	503.351	1118.1	181.114	511.194	1189.34	231.589	648.046	827.688	520.285	394.461	841.886	480.597	407.074	872.428	414.206	328.888	866.724	437.465	240.539	848.319	421.452
159	1.58	545.435	1260.61	248.633	602.606	1250.95	186.167	580.211	1250.61	319.335	718.681	1119.25	132.002	706.08	1117.12	392.715	614.9	1062.06	255.708	571.557	861.538	-15.8376	491.868	1047.26	152.238	538.973	1076.08	114.002	504.042	1118.15	181.211	511.905	1189.45	231.831	648.126	827.752	520.309	394.478	841.905	480.6	407.093	872.47	414.215	328.925	866.724	437.453	240.539	848.306	421.448
160	1.59	545.399	1260.57	248.521	602.598	1250.91	186.057	580.247	1250.58	319.152	718.669	1119.23	131.984	706.071	1117.17	392.663	614.841	1062.16	255.607	571.528	861.577	-15.898	492.237	1047.36	152.348	539.444	1076.13	114.066	504.628	1118.2	181.278	512.592	1189.57	231.914	648.165	827.81	520.307	394.523	841.933	480.569	407.1	872.482	414.175	328.932	866.741	437.402	240.552	848.296	421.412
161	1.6	545.358	1260.57	248.429	602.539	1250.88	185.949	580.292	1250.58	318.988	718.706	1119.22	131.946	706.051	1117.21	392.606	614.701	1062.31	255.52	571.486	861.598	-15.9113	492.565	1047.44	152.454	539.83	1076.16	114.098	505.106	1118.27	181.322	513.237	1189.74	231.9	648.205	827.871	520.28	394.581	841.964	480.551	407.135	872.5	414.135	328.924	866.76	437.368	240.563	848.299	421.377
162	1.61	545.328	1260.56	248.368	602.536	1250.84	185.841	580.207	1250.59	318.892	718.705	1119.16	131.901	706.065	1117.21	392.553	614.736	1062.36	255.417	571.425	861.597	-15.9084	492.903	1047.54	152.588	540.206	1076.18	114.137	505.582	1118.34	181.363	513.892	1189.92	231.855	648.255	827.906	520.284	394.62	841.946	480.537	407.209	872.464	414.114	328.945	866.753	437.356	240.606	848.276	421.373
163	1.62	545.307	1260.54	248.322	602.521	1250.78	185.747	580.136	1250.56	318.858	718.674	1119.12	131.859	706.06	1117.22	392.55	614.938	1062.28	255.291	571.395	861.59	-15.8836	493.334	1047.61	152.737	540.585	1076.22	114.19	506.014	1118.44	181.421	514.553	1190.1	231.82	648.272	827.905	520.317	394.628	841.924	480.535	407.311	872.381	414.105	328.976	866.739	437.357	240.645	848.258	421.381
164	1.63	545.242	1260.5	248.28	602.423	1250.71	185.679	580.12	1250.55	318.833	718.653	1119.07	131.838	706.011	1117.23	392.532	615.047	1062.2	255.213	571.336	861.58	-15.8141	493.655	1047.71	152.842	540.951	1076.28	114.243	506.391	1118.58	181.467	515.242	1190.29	231.778	648.298	827.912	520.338	394.623	841.879	480.539	407.326	872.334	414.12	328.972	866.728	437.379	240.671	848.264	421.4
165	1.64	545.141	1260.45	248.25	602.3	1250.65	185.662	580.057	1250.54	318.798	718.606	1119.03	131.819	705.95	1117.24	392.503	615.139	1062.15	255.162	571.225	861.534	-15.7377	493.933	1047.84	152.913	541.323	1076.33	114.289	506.762	1118.74	181.498	516.024	1190.51	231.742	648.228	827.906	520.327	394.592	841.839	480.545	407.293	872.284	414.155	328.952	866.734	437.408	240.655	848.284	421.436
166	1.65	545.108	1260.39	248.215	602.249	1250.6	185.624	580.017	1250.52	318.772	718.576	1119	131.806	705.897	1117.28	392.495	615.213	1062.12	255.131	571.131	861.523	-15.6715	494.304	1047.99	152.976	541.73	1076.38	114.348	507.121	1118.9	181.532	516.825	1190.7	231.736	648.194	827.942	520.339	394.591	841.833	480.567	407.272	872.256	414.182	328.966	866.714	437.422	240.639	848.284	421.443
167	1.66	545.119	1260.31	248.15	602.213	1250.52	185.539	580.11	1250.4	318.669	718.517	1118.98	131.801	705.89	1117.34	392.499	615.295	1062.11	255.111	571.004	861.488	-15.6149	494.807	1048.16	152.999	542.157	1076.44	114.399	507.514	1119.02	181.522	517.411	1190.93	231.704	648.241	828.01	520.36	394.588	841.855	480.599	407.286	872.28	414.169	328.987	866.689	437.43	240.646	848.262	421.443
168	1.67	545.169	1260.17	248.05	602.196	1250.41	185.389	580.157	1250.3	318.531	718.105	1118.76	131.707	705.842	1117.41	392.474	615.328	1062.14	255.06	570.864	861.445	-15.5701	495.289	1048.32	152.946	542.555	1076.47	114.415	508.013	1119.09	181.439	517.639	1191.23	231.394	648.26	828.082	520.361	394.552	841.899	480.57	407.236	872.334	414.109	328.982	866.691	437.389	240.616	848.255	421.408
169	1.68	545.117	1260.11	247.964	602.116	1250.32	185.236	580.079	1250.26	318.398	717.313	1118.32	131.527	705.818	1117.48	392.443	615.24	1062.22	254.988	570.709	861.432	-15.5149	495.631	1048.46	152.882	542.858	1076.52	114.434	508.42	1119.21	181.382	517.4	1191.62	230.775	648.277	828.165	520.355	394.526	841.928	480.559	407.175	872.405	414.103	328.963	866.7	437.356	240.573	848.266	421.377
170	1.69	545.032	1260.1	247.919	602.014	1250.28	185.165	579.996	1250.29	318.328	717.216	1118.26	131.491	705.803	1117.52	392.443	615.27	1062.23	254.949	570.562	861.464	-15.455	495.744	1048.61	152.874	543.06	1076.58	114.484	508.685	1119.34	181.408	517.599	1191.88	230.62	648.289	828.207	520.377	394.513	841.933	480.558	407.13	872.423	414.119	328.943	866.725	437.362	240.561	848.294	421.381
171	1.7	544.969	1260.09	247.894	601.922	1250.3	185.13	579.859	1250.32	318.341	717.248	1118.27	131.479	705.756	1117.55	392.449	615.398	1062.19	254.918	570.497	861.521	-15.4081	495.837	1048.72	152.903	543.151	1076.64	114.533	508.824	1119.44	181.452	517.821	1192.07	230.577	648.314	828.26	520.392	394.508	841.918	480.571	407.159	872.377	414.152	328.935	866.744	437.387	240.575	848.328	421.408
172	1.71	544.888	1260.08	247.863	601.839	1250.27	185.071	579.753	1250.35	318.32	717.305	1118.24	131.468	705.711	1117.55	392.446	615.472	1062.15	254.888	570.407	861.566	-15.3963	495.834	1048.78	152.935	543.149	1076.68	114.556	508.842	1119.47	181.459	517.968	1192.16	230.597	648.262	828.267	520.389	394.51	841.904	480.579	407.188	872.321	414.142	328.947	866.743	437.386	240.6	848.323	421.419
173	1.72	544.818	1260.05	247.813	601.79	1250.21	185.006	579.722	1250.33	318.243	717.329	1118.19	131.477	705.73	1117.56	392.433	615.391	1062.19	254.879	570.353	861.622	-15.4159	495.687	1048.79	152.935	543.09	1076.69	114.57	508.719	1119.5	181.445	518.018	1192.15	230.649	648.241	828.239	520.382	394.525	841.873	480.579	407.239	872.285	414.117	328.957	866.722	437.397	240.626	848.3	421.413
174	1.73	544.777	1260.01	247.756	601.768	1250.13	184.939	579.761	1250.27	318.157	717.289	1118.14	131.47	705.747	1117.56	392.422	615.27	1062.25	254.902	570.322	861.662	-15.4576	495.391	1048.82	152.852	542.952	1076.67	114.584	508.478	1119.51	181.369	517.805	1192.12	230.723	648.271	828.23	520.388	394.559	841.849	480.581	407.266	872.268	414.131	328.979	866.687	437.384	240.653	848.278	421.406
175	1.74	544.793	1259.96	247.717	601.742	1250.06	184.874	579.774	1250.22	318.128	717.247	1118.07	131.457	705.757	1117.59	392.422	615.239	1062.29	254.922	570.296	861.658	-15.4845	495.02	1048.83	152.737	542.738	1076.63	114.567	508.146	1119.51	181.269	517.475	1192.06	230.798	648.375	828.272	520.418	394.588	841.845	480.592	407.3	872.266	414.15	329.004	866.671	437.371	240.674	848.252	421.403
176	1.75	544.764	1259.95	247.682	601.737	1250	184.799	579.818	1250.2	318.08	717.172	1118	131.41	705.738	1117.64	392.423	615.197	1062.35	254.949	570.323	861.69	-15.5231	494.438	1048.78	152.586	542.411	1076.59	114.537	507.555	1119.52	181.143	517.09	1191.99	230.795	648.421	828.32	520.421	394.591	841.846	480.592	407.354	872.269	414.164	329.022	866.668	437.36	240.679	848.23	421.388
177	1.76	544.732	1259.91	247.642	601.702	1249.95	184.75	579.719	1250.2	318.071	716.982	1117.9	131.337	705.701	1117.67	392.425	615.221	1062.36	254.952	570.383	861.745	-15.5922	493.628	1048.72	152.353	541.971	1076.52	114.482	506.883	1119.52	180.968	516.598	1191.91	230.715	648.418	828.356	520.422	394.565	841.865	480.579	407.316	872.301	414.118	329.001	866.675	437.328	240.64	848.249	421.375
178	1.77	544.672	1259.9	247.645	601.626	1249.9	184.745	579.623	1250.2	318.068	717.187	1118.02	131.373	705.676	1117.68	392.437	615.237	1062.33	254.992	570.513	861.774	-15.6648	492.804	1048.62	152.044	541.414	1076.42	114.397	506.177	1119.48	180.741	516.169	1191.71	230.805	648.406	828.384	520.445	394.552	841.882	480.566	407.263	872.332	414.112	328.988	866.695	437.323	240.613	848.286	421.375
179	1.78	544.6	1259.9	247.702	601.589	1249.92	184.776	579.532	1250.23	318.13	718.075	1118.51	131.589	705.694	1117.69	392.472	615.085	1062.34	255.119	570.634	861.83	-15.7395	491.847	1048.56	151.582	540.663	1076.33	114.283	505.283	1119.44	180.457	515.782	1191.34	231.25	648.351	828.388	520.479	394.545	841.883	480.585	407.174	872.382	414.13	328.965	866.719	437.354	240.578	848.33	421.399
180	1.79	544.53	1259.88	247.778	601.578	1249.92	184.821	579.35	1250.26	318.211	718.317	1118.63	131.668	705.661	1117.68	392.513	614.866	1062.33	255.308	570.825	861.851	-15.7833	490.6	1048.54	150.949	539.795	1076.21	114.126	503.969	1119.45	179.989	514.605	1191.01	231.364	648.313	828.376	520.487	394.499	841.87	480.578	407.108	872.4	414.127	328.945	866.738	437.396	240.567	848.354	421.426
181	1.8	544.478	1259.81	247.827	601.555	1249.88	184.893	579.396	1250.16	318.231	718.341	1118.66	131.691	705.641	1117.65	392.545	614.625	1062.3	255.478	571.097	861.819	-15.8372	489.16	1048.43	150.137	538.815	1076.1	113.891	502.232	1119.42	179.28	512.811	1190.68	231.292	648.319	828.374	520.494	394.499	841.838	480.584	407.121	872.354	414.12	328.942	866.729	437.418	240.577	848.356	421.43
182	1.81	544.495	1259.69	247.872	601.49	1249.78	184.949	579.377	1250.06	318.234	718.348	1118.65	131.702	705.66	1117.65	392.575	614.531	1062.21	255.6	571.401	861.744	-15.9274	487.414	1048.21	149.042	537.546	1075.95	113.582	499.508	1119.62	178.372	510.201	1190.28	231.037	648.299	828.348	520.516	394.507	841.84	480.588	407.201	872.297	414.12	328.954	866.707	437.411	240.616	848.307	421.429
183	1.82	544.591	1259.53	247.914	601.512	1249.69	185.011	579.385	1249.96	318.247	718.384	1118.65	131.739	705.723	1117.67	392.628	614.288	1062.11	255.802	571.794	861.672	-16.0311	485.421	1047.95	147.736	535.901	1075.85	113.193	495.449	1120.17	177.212	506.805	1189.92	230.604	648.333	828.337	520.554	394.528	841.851	480.597	407.3	872.25	414.132	328.993	866.676	437.39	240.666	848.261	421.42
184	1.83	544.614	1259.41	247.98	601.549	1249.6	185.067	579.399	1249.89	318.297	718.401	1118.64	131.761	705.8	1117.69	392.683	613.705	1062.18	256.141	572.328	861.58	-16.1685	483.179	1047.73	146.235	534.107	1075.75	112.891	492.235	1120.02	176.012	502.824	1189.67	229.919	648.408	828.349	520.573	394.568	841.858	480.615	407.332	872.257	414.166	329.016	866.668	437.378	240.685	848.235	421.405
185	1.84	544.573	1259.32	248.041	601.533	1249.54	185.132	579.27	1249.86	318.391	718.494	1118.67	131.766	705.857	1117.7	392.713	612.746	1062.46	256.618	572.973	861.453	-16.3089	480.43	1047.39	144.488	531.974	1075.34	112.634	488.974	1119.7	174.575	498.27	1189.34	228.809	648.427	828.371	520.549	394.588	841.883	480.585	407.337	872.289	414.148	329.009	866.679	437.333	240.669	848.232	421.368
186	1.85	544.569	1259.2	248.117	601.542	1249.45	185.222	579.23	1249.8	318.489	718.642	1118.73	131.825	705.898	1117.71	392.742	611.907	1062.67	257.04	573.623	861.314	-16.4352	477.217	1046.76	142.552	529.495	1074.99	112.019	485.19	1119.13	173.035	492.717	1188.91	227.49	648.411	828.376	520.547	394.565	841.901	480.56	407.319	872.308	414.132	328.984	866.69	437.293	240.632	848.243	421.326
187	1.86	544.581	1259.1	248.257	601.572	1249.38	185.373	579.352	1249.72	318.623	718.931	1118.8	131.971	705.97	1117.7	392.806				574.226	861.174	-16.3959	473.654	1046.29	140.402	526.962	1074.61	111.318	481.001	1118.41	171.313	486.527	1188.3	226.036	648.362	828.349	520.573	394.555	841.908	480.557	407.296	872.338	414.117	329.003	866.704	437.284	240.628	848.266	421.325
188	1.87	544.542	1259.04	248.47	601.598	1249.37	185.581	579.446	1249.63	318.826	719.101	1118.83	132.03	706.051	1117.68	392.894				574.828	861.009	-16.1558	469.945	1045.71	137.896	524.241	1074.23	110.61	476.362	1117.57	169.33	479.701	1187.49	224.258	648.332	828.345	520.594	394.525	841.899	480.569	407.257	872.335	414.127	329.027	866.724	437.324	240.64	848.31	421.355
189	1.88	544.464	1258.98	248.729	601.61	1249.43	185.823	579.424	1249.6	319.108	719.177	1118.85	132.046	706.097	1117.64	392.981				575.567	860.851	-16.0149	466.02	1044.81	134.991	521.225	1073.78	110.024	471.373	1116.49	167.179	471.981	1186.38	222.338	648.255	828.293	520.608	394.488	841.903	480.589	407.226	872.322	414.149	328.988	866.757	437.375	240.613	848.359	421.394
190	1.89	544.437	1258.92	249.008	601.68	1249.43	186.067	579.473	1249.57	319.394	719.236	1118.88	132.062	706.158	1117.59	393.075				576.371	860.61	-15.8855	461.868	1043.9	131.677	518.08	1073.14	109.554	466.151	1115.15	164.731	463.629	1184.97	220.275	648.166	828.241	520.62	394.448	841.907	480.617	407.123	872.349	414.149	328.968	866.778	437.408	240.613	848.389	421.417
191	1.9	544.559	1258.81	249.305	601.774	1249.38	186.319	579.704	1249.46	319.665	719.32	1118.92	132.085	706.281	1117.55	393.142	616.082	1063.58	255.921	577.217	860.297	-15.8049	457.495	1042.81	128.037	515.022	1072.28	109.197	460.415	1113.73	161.931	454.883	1183.06	218.007	648.182	828.206	520.624	394.442	841.91	480.62	407.134	872.355	414.165	328.975	866.768	437.417	240.62	848.383	421.423
192	1.91	544.69	1258.7	249.651	601.912	1249.31	186.559	579.911	1249.36	319.951	719.428	1118.98	132.084	706.37	1117.51	393.196	616.486	1063.08	255.804	578.172	859.938	-15.716	452.896	1041.55	124.077	511.913	1071.01	108.983	454.364	1112.23	158.938	445.654	1180.86	215.559	648.254	828.171	520.64	394.486	841.898	480.618	407.188	872.35	414.188	328.993	866.737	437.408	240.63	848.354	421.407
193	1.92	544.755	1258.61	250.038	601.977	1249.3	186.786	580.109	1249.28	320.241	719.586	1119.07	132.082	706.485	1117.45	393.251	615.633	1063.5	256.182	579.296	859.595	-15.6782	448.042	1040.22	119.839	508.642	1069.35	109.036	448.048	1110.54	155.824	436.14	1178.37	212.939	648.286	828.137	520.64	394.533	841.885	480.61	407.243	872.353	414.188	328.992	866.726	437.375	240.631	848.323	421.385
194	1.93	544.831	1258.55	250.453	602.008	1249.3	187.061	580.27	1249.25	320.607	719.718	1119.14	132.089	706.584	1117.41	393.313	614.157	1064.3	256.833	580.525	859.404	-15.7791	442.33	1039.09	115.418	505.094	1067.35	109.404	441.637	1108.54	152.581	426.382	1175.53	210.006	648.276	828.08	520.633	394.545	841.879	480.614	407.264	872.376	414.182	328.996	866.719	437.354	240.653	848.284	421.365
195	1.94	544.985	1258.5	250.909	601.993	1249.36	187.375	580.517	1249.2	320.999	719.848	1119.19	132.115	706.686	1117.36	393.386	615.539	1063.83	256.525	581.741	859.352	-15.9543	435.984	1037.86	110.73	501.199	1065.1	109.979	435.191	1106.18	149.433	416.375	1172.32	206.901	648.3	828.029	520.621	394.575	841.877	480.61	407.348	872.357	414.217	328.993	866.706	437.355	240.672	848.271	421.365
196	1.95	545.197	1258.43	251.352	601.918	1249.45	187.698	580.804	1249.18	321.341	720.005	1119.26	132.144	706.735	1117.33	393.459	616.54	1063.7	256.141	582.846	859.246	-16.0279	431.488	1035.9	105.928	496.937	1062.63	110.707	428.686	1103.43	146.205	406.353	1168.58	203.676	648.321	827.986	520.621	394.589	841.877	480.613	407.383	872.325	414.224	329.011	866.694	437.367	240.687	848.275	421.375
197	1.96	545.364	1258.39	251.751	601.803	1249.54	188.049	581.046	1249.15	321.659	720.146	1119.31	132.175	706.762	1117.3	393.542	615.68	1064.2	256.38	583.929	859.095	-15.9876	427.6	1033.5	100.957	492.056	1059.74	111.621	421.951	1100.19	143.115	396.276	1164.11	200.267	648.28	827.913	520.608	394.578	841.87	480.589	407.354	872.302	414.203	329.005	866.698	437.346	240.676	848.28	421.362
198	1.97	545.404	1258.42	252.125	601.681	1249.61	188.428	581.296	1249.12	321.977	720.245	1119.37	132.214	706.787	1117.28	393.634	614.883	1064.35	256.6	584.955	858.913	-15.9609	422.899	1030.65	97.5777	486.542	1055.79	112.965	415.149	1096.53	140.091	385.764	1159.02	196.848	648.218	827.881	520.614	394.539	841.887	480.584	407.265	872.329	414.193	328.99	866.726	437.349	240.627	848.323	421.351
199	1.98	545.388	1258.49	252.527	601.567	1249.68	188.825	581.588	1249.1	322.367	720.339	1119.41	132.244	706.833	1117.29	393.731	614.674	1064.48	256.743	586.106	858.765	-16.0577	418.432	1027.52	94.1334	481.376	1051.93	113.594	408.203	1092.28	137.099	374.577	1153.19	193.41	648.173	827.848	520.614	394.518	841.923	480.599	407.196	872.39	414.192	328.983	866.782	437.383	240.612	848.362	421.373
200	1.99	545.407	1258.52	252.972	601.557	1249.72	189.207	581.847	1249.07	322.757	720.402	1119.46	132.259	706.866	1117.3	393.815	614.619	1064.59	256.871	587.429	858.698	-16.2375	414.92	1023.99	89.9592	476.296	1048.37	114.097	401.113	1087.41	134.231	363.174	1146.46	189.687	648.166	827.828	520.607	394.524	841.953	480.605	407.201	872.436	414.205	328.98	866.811	437.388	240.599	848.385	421.378
201	2	545.418	1258.53	253.374	601.542	1249.74	189.6	582.018	1249.04	323.119	720.399	1119.52	132.232	706.887	1117.3	393.877	614.65	1064.64	256.957	588.673	858.667	-16.4092	411.501	1020.09	86.2121	471.021	1045.01	114.304	393.892	1082.15	131.457	351.405	1139.02	185.769	648.146	827.838	520.633	394.524	841.971	480.583	407.238	872.434	414.176	328.958	866.812	437.354	240.59	848.399	421.348
202	2.01	545.49	1258.48	253.776	601.552	1249.76	189.919	582.24	1248.98	323.464	720.348	1119.57	132.216	706.903	1117.29	393.935	614.652	1064.67	257.016	589.56	858.616	-16.5046	408.288	1015.97	82.7295	465.704	1041.23	114.466	386.762	1076.44	128.633	339.666	1130.91	181.551	648.089	827.839	520.64	394.504	841.961	480.564	407.189	872.436	414.17	328.934	866.802	437.318	240.553	848.389	421.314
203	2.02	545.69	1258.4	254.258	601.59	1249.81	190.268	582.453	1248.91	323.85	720.273	1119.63	132.228	706.905	1117.29	393.992	614.644	1064.69	257.088	590.319	858.466	-16.6315	405.003	1011.81	79.5169	460.396	1036.95	114.728	380.05	1070.54	125.913	328.545	1122.2	177.127	648.098	827.845	520.686	394.483	841.947	480.564	407.183	872.427	414.197	328.951	866.765	437.329	240.56	848.362	421.32
204	2.03	545.972	1258.31	254.793	601.642	1249.86	190.67	582.619	1248.84	324.333	720.242	1119.72	132.267	706.92	1117.27	394.065	614.664	1064.7	257.203	591.119	858.284	-16.9067	401.539	1007.57	76.5725	455.061	1032.08	115.278	373.88	1064.55	123.327	318.234	1113.59	172.916	648.152	827.838	520.757	394.492	841.921	480.602	407.192	872.415	414.218	329.004	866.709	437.369	240.603	848.321	421.346
205	2.04	546.207	1258.24	255.27	601.707	1249.92	191.035	582.808	1248.79	324.787	720.163	1119.79	132.32	706.897	1117.25	394.133	614.641	1064.71	257.307	592.11	858.121	-17.3638	398.297	1003.34	73.7102	449.897	1026.74	116.18	367.956	1058.64	120.874	309.039	1105.21	168.949	648.111	827.804	520.798	394.492	841.877	480.612	407.222	872.39	414.237	328.993	866.675	437.382	240.623	848.284	421.35
206	2.05	546.356	1258.2	255.713	601.78	1249.96	191.375	583.021	1248.78	325.147	720.013	1119.85	132.401	706.876	1117.23	394.183	614.514	1064.76	257.412	593.157	857.983	-17.9175	395.387	999.113	70.8445	444.451	1020.84	116.942	362.148	1052.8	118.486	300.904	1097.14	165.262	648.109	827.797	520.842	394.467	841.85	480.616	407.217	872.331	414.272	328.977	866.676	437.389	240.647	848.255	421.344
207	2.06	546.39	1258.22	256.12	601.864	1250.01	191.704	583.159	1248.8	325.521	719.828	1119.9	132.467	706.859	1117.25	394.25	614.348	1064.81	257.547	594.115	857.885	-18.3339	392.659	994.815	68.0951	440.024	1016.39	116.591	357.312	1046.87	116.135	293.955	1089.45	162.122	648.162	827.831	520.92	394.482	841.853	480.621	407.217	872.312	414.288	329.007	866.676	437.389	240.661	848.252	421.336
208	2.07	546.288	1258.29	256.532	601.874	1250.1	192.041	583.289	1248.82	325.891	719.626	1119.95	132.493	706.833	1117.26	394.336	614.156	1064.89	257.718	594.869	857.745	-18.6398	390.107	990.564	65.5707				353.201	1040.7	113.854	287.566	1081.82	159.316	648.156	827.845	520.949	394.488	841.887	480.63	407.269	872.354	414.287	328.991	866.723	437.394	240.649	848.285	421.337
209	2.08	546.053	1258.38	256.992	601.851	1250.19	192.36	583.395	1248.82	326.246	719.381	1120	132.506	706.857	1117.29	394.4	613.93	1064.99	257.866	595.464	857.534	-18.9025	387.602	986.343	63.3072				349.488	1034.2	111.469	281.352	1074.16	156.477	648.119	827.844	520.977	394.517	841.923	480.645	407.272	872.428	414.297	328.942	866.776	437.421	240.615	848.341	421.341
210	2.09	545.858	1258.42	257.452	601.818	1250.24	192.625	583.468	1248.79	326.601	719.049	1119.98	132.462	706.849	1117.32	394.432	613.726	1065.08	257.994	596.097	857.233	-19.1444	385.333	981.992	61.1671				345.335	1027.97	109.451	275.999	1066.23	153.531	648.143	827.872	521.008	394.516	841.938	480.646	407.211	872.49	414.304	328.928	866.81	437.408	240.578	848.376	421.332
211	2.1	545.835	1258.37	257.87	601.735	1250.27	192.896	583.562	1248.69	326.963	718.66	1119.93	132.377	706.847	1117.35	394.461	613.64	1065.08	258.116	596.818	856.819	-19.3525	383.466	977.659	59.1016				340.943	1021.71	107.503	270.541	1057.44	149.967	648.133	827.9	521.031	394.505	841.929	480.649	407.206	872.5	414.302	328.984	866.804	437.389	240.606	848.383	421.323
212	2.11	545.849	1258.29	258.313	601.625	1250.29	193.219	583.559	1248.57	327.356	718.278	1119.89	132.26	706.774	1117.37	394.47	613.564	1065.03	258.281	597.584	856.322	-19.423	381.97	973.354	57.3222				336.912	1015.5	105.64	264.381	1048.33	145.81	648.161	827.931	521.089	394.495	841.911	480.672	407.152	872.489	414.299	329.017	866.788	437.401	240.63	848.385	421.335
213	2.12	545.889	1258.21	258.77	601.418	1250.31	193.584	583.441	1248.47	327.805	717.951	1119.86	132.136	706.736	1117.38	394.483	613.431	1064.98	258.446	598.246	855.81	-19.3757	380.108	969.374	55.2996				332.842	1009.19	103.762	258.151	1038.98	141.494	648.148	827.954	521.134	394.472	841.885	480.688	407.108	872.449	414.326	329.008	866.766	437.433	240.634	848.391	421.366
214	2.13	545.975	1258.09	259.209	601.145	1250.31	193.932	583.427	1248.32	328.255	717.643	1119.83	132.027	706.698	1117.4	394.494	613.346	1064.89	258.571	598.825	855.399	-19.3523	378.761	965.59	53.6448	414.095	975.699	113.915	328.31	1002.58	101.604	253.012	1030.18	137.489	648.128	827.986	521.173	394.453	841.854	480.705	407.152	872.386	414.341	329.013	866.725	437.456	240.658	848.357	421.38
215	2.14	546.091	1257.94	259.614	600.893	1250.3	194.231	583.501	1248.17	328.618	717.4	1119.84	131.952	706.639	1117.43	394.482	613.302	1064.83	258.647	599.383	855.07	-19.4214	377.461	961.834	52.1395	411.704	971.683	113.568	325.368	996.573	99.852	248.575	1021.7	133.815	648.177	828.037	521.202	394.459	841.82	480.716	407.205	872.355	414.357	329.03	866.682	437.445	240.666	848.316	421.352
216	2.15	546.139	1257.82	259.985	600.59	1250.28	194.543	583.555	1248.05	328.886	717.193	1119.88	131.928	706.605	1117.47	394.492	613.255	1064.8	258.698	600.037	854.697	-19.5746	375.944	957.895	50.86	408.664	966.459	113.122	323.289	991.082	98.3694	244.479	1014.01	130.675	648.228	828.085	521.23	394.463	841.818	480.712	407.287	872.336	414.363	329.034	866.662	437.426	240.694	848.265	421.327
217	2.16	546.135	1257.74	260.349	600.241	1250.27	194.866	583.606	1247.93	329.135	717.04	1119.91	131.974	706.556	1117.52	394.506	613.221	1064.82	258.766	600.774	854.317	-19.714	374.946	953.537	50.0696	405.577	961.061	112.691	321.133	985.771	96.7799	241.172	1007.06	128.069	648.249	828.133	521.235	394.487	841.821	480.704	407.35	872.336	414.348	329.019	866.666	437.412	240.727	848.246	421.328
218	2.17	546.04	1257.71	260.721	599.994	1250.25	195.172	583.753	1247.81	329.375	716.905	1119.95	132	706.544	1117.57	394.542	613.132	1064.88	258.86	601.531	853.971	-19.7739	374.901	948.795	49.7981	402.759	955.76	112.119	319.252	980.71	95.1189	238.455	1000.79	125.904	648.31	828.2	521.272	394.492	841.831	480.697	407.31	872.373	414.306	329.031	866.702	437.402	240.729	848.258	421.32
219	2.18	545.901	1257.65	261.107	599.877	1250.21	195.416	583.787	1247.76	329.617	716.738	1119.97	132.004	706.553	1117.6	394.571	613	1064.96	258.952	602.286	853.606	-19.7577	373.592	944.482	48.9293	400.648	950.775	111.483	317.346	975.929	93.4885	236.059	994.859	123.785	648.339	828.218	521.3	394.479	841.842	480.693	407.282	872.378	414.311	329.016	866.737	437.405	240.689	848.29	421.326
220	2.19	545.707	1257.55	261.488	599.763	1250.18	195.656	583.732	1247.74	329.905	716.543	1119.98	131.953	706.525	1117.61	394.572	612.85	1065.04	259.067	602.994	853.305	-19.7416	371.956	940.915	47.6496	398.678	946.218	111.122	315.363	971.463	91.9453	234.242	989.063	121.564	648.324	828.23	521.321	394.468	841.835	480.704	407.329	872.348	414.324	329.001	866.757	437.431	240.668	848.339	421.345
221	2.2	545.411	1257.45	261.866	599.581	1250.12	195.878	583.673	1247.69	330.215	716.299	1119.99	131.846	706.497	1117.65	394.571	612.692	1065.1	259.184	603.672	853.026	-19.7115	371.283	938.305	45.7431	397.463	942.038	110.718	314.022	966.88	90.6761	232.938	983.194	119.373	648.307	828.26	521.325	394.46	841.819	480.709	407.291	872.361	414.336	328.991	866.778	437.45	240.676	848.378	421.367
222	2.21	545.079	1257.35	262.222	599.351	1250.07	196.104	583.671	1247.57	330.448	716.101	1120.02	131.71	706.511	1117.68	394.551	612.569	1065.12	259.289	604.445	852.676	-19.7482	371.116	935.27	44.9155	396.678	938.261	110.374	313.583	962.032	89.8098	231.548	977.145	117.238	648.336	828.31	521.343	394.479	841.807	480.727	407.248	872.343	414.367	328.967	866.771	437.472	240.681	848.391	421.375
223	2.22	544.891	1257.19	262.512	599.163	1250	196.277	584.677	1247.18	330.382	715.937	1120.07	131.61	706.466	1117.69	394.521	612.497	1065.05	259.329	605.353	852.322	-19.9815	371.2	932.3	44.5271	396.039	934.916	110.295	313.232	957.629	89.1463	230.527	970.987	115.449	648.365	828.387	521.403	394.481	841.802	480.738	407.3	872.315	414.384	328.987	866.762	437.467	240.671	848.371	421.37
224	2.23	544.747	1257.02	262.712	599.009	1249.91	196.395	586.814	1246.49	330.006	715.803	1120.13	131.548	706.399	1117.73	394.518	612.522	1064.94	259.304	606.321	852.049	-20.4313	371.431	929.572	44.328	395.869	931.593	110.36	312.897	953.484	88.792	229.714	965.153	114.24	648.365	828.444	521.432	394.476	841.803	480.742	407.309	872.334	414.354	329.012	866.713	437.427	240.689	848.32	421.34
225	2.24	544.661	1256.89	262.855	598.822	1249.86	196.5	587.34	1246.27	330.005	715.748	1120.22	131.528	706.345	1117.77	394.507	612.579	1064.87	259.261	607.244	851.931	-20.981	371.704	927.001	44.3593	395.881	928.404	110.515	312.634	949.624	88.7079	229.155	959.622	113.599	648.393	828.499	521.46	394.483	841.817	480.745	407.317	872.354	414.34	329.056	866.677	437.395	240.71	848.282	421.309
226	2.25	544.506	1256.81	262.982	598.596	1249.84	196.599	587.346	1246.17	330.096	715.701	1120.3	131.546	706.252	1117.79	394.494	612.525	1064.91	259.226	608.041	851.863	-21.4901	372.082	924.672	44.3929	395.797	925.384	110.788	312.559	946.041	88.7533	228.785	954.539	113.541	648.42	828.525	521.496	394.484	841.824	480.733	407.291	872.364	414.338	329.046	866.69	437.389	240.688	848.279	421.286
227	2.26	544.312	1256.74	263.122	598.344	1249.8	196.69	586.362	1246.31	330.447	715.666	1120.38	131.586	706.156	1117.82	394.52	612.432	1064.99	259.225	608.641	851.798	-21.8574	372.354	922.477	44.581	395.813	922.341	111.054	312.723	942.57	88.7933	228.543	949.882	113.754	648.368	828.523	521.545	394.447	841.805	480.731	407.317	872.363	414.329	329.014	866.712	437.399	240.641	848.307	421.29
228	2.27	544.153	1256.64	263.243	598.034	1249.76	196.819	585.106	1246.5	330.851	715.643	1120.45	131.654	706.082	1117.83	394.549	612.395	1065.07	259.255	609.299	851.765	-22.0713	372.717	920.352	44.626	395.819	919.614	111.263	312.675	939.277	88.8162	228.395	945.659	113.748	648.356	828.543	521.6	394.428	841.793	480.746	407.295	872.325	414.379	329.008	866.723	437.43	240.649	848.323	421.32
229	2.28	544.025	1256.49	263.323	597.784	1249.68	196.923	585.69	1246.13	330.757	715.661	1120.51	131.747	706.006	1117.84	394.591	612.371	1065.16	259.298	610.062	851.714	-22.1644	373.061	918.231	44.619	395.679	916.934	111.377	312.416	935.82	88.8135	228.146	941.746	113.18	648.286	828.537	521.656	394.402	841.759	480.77	407.271	872.276	414.381	329.024	866.719	437.454	240.673	848.326	421.348
230	2.29	543.904	1256.28	263.369	597.564	1249.56	196.961	583.712	1246.53	331.267	715.701	1120.57	131.816	705.968	1117.84	394.614	612.389	1065.23	259.315	610.841	851.56	-22.1203	373.273	916.12	44.4407	395.361	914.16	111.319	311.864	932.08	88.6307	227.816	937.959	111.99	648.209	828.508	521.657	394.4	841.738	480.762	407.227	872.25	414.368	328.997	866.709	437.458	240.668	848.313	421.35
231	2.3	543.806	1256.04	263.37	597.358	1249.41	196.97	583.109	1246.54	331.385	715.787	1120.67	131.891	706.001	1117.85	394.649	612.514	1065.26	259.299	611.58	851.355	-22.0286	373.466	913.88	44.1077	395.01	911.602	111.099	311.543	928.938	88.0149	227.496	934.212	110.46	648.173	828.494	521.632	394.393	841.747	480.757	407.184	872.263	414.371	328.957	866.708	437.441	240.648	848.311	421.332
232	2.31	543.78	1255.78	263.346	597.285	1249.24	196.95	583.013	1246.36	331.381	715.853	1120.76	131.953	706.1	1117.85	394.672	612.714	1065.29	259.27	612.38	851.16	-21.9008	373.452	911.582	43.8013	394.798	908.999	110.829	311.341	926.052	87.2819	227.047	930.602	108.734	648.184	828.496	521.588	394.391	841.766	480.744	407.196	872.299	414.36	328.964	866.708	437.401	240.645	848.3	421.303
233	2.32	543.713	1255.54	263.316	597.238	1249.08	196.932	582.987	1246.19	331.34	715.928	1120.84	131.989	706.192	1117.86	394.674	612.818	1065.36	259.262	613.203	850.967	-21.7556	373.58	909.191	43.4458	394.443	906.443	110.622	311.035	923.128	86.5785	226.477	927.118	107.126	648.271	828.542	521.567	394.424	841.808	480.717	407.276	872.34	414.329	328.957	866.707	437.372	240.622	848.303	421.28
234	2.33	543.592	1255.35	263.274	597.133	1248.91	196.896	582.903	1246.06	331.266	716.023	1120.91	132.011	706.521	1117.95	394.478	612.88	1065.41	259.255	613.9	850.816	-21.6617	373.487	906.927	43.0229	394.114	903.882	110.368	310.769	920.229	85.8353	225.926	923.758	105.724	648.332	828.551	521.538	394.452	841.84	480.676	407.268	872.381	414.29	328.96	866.717	437.334	240.609	848.314	421.246
235	2.34	543.512	1255.14	263.211	597.125	1248.75	196.8	582.791	1245.93	331.207	716.091	1120.96	132.029	707.132	1118.11	394.09	612.904	1065.48	259.257	614.531	850.745	-21.6122	373.518	904.649	42.5694	393.672	901.436	110.012	310.57	917.517	85.1377	225.432	920.509	104.595	648.314	828.517	521.487	394.447	841.862	480.641	407.253	872.404	414.276	328.97	866.745	437.29	240.601	848.326	421.225
236	2.35	543.511	1254.93	263.151	597.093	1248.64	196.733	582.786	1245.81	331.168	716.128	1120.96	132.039	707.143	1118.02	394.235	612.96	1065.51	259.269	615.127	850.785	-21.6308	373.571	902.442	42.1226	393.358	898.922	109.644	310.386	914.807	84.5629	225.106	917.182	103.523	648.308	828.475	521.491	394.45	841.866	480.644	407.307	872.387	414.25	329.003	866.746	437.289	240.632	848.341	421.24
237	2.36	543.497	1254.78	263.142	596.991	1248.53	196.773	582.759	1245.66	331.142	716.206	1120.98	132.052	706.703	1117.87	394.646	613.073	1065.55	259.32	615.642	850.887	-21.6805	373.933	900.242	41.9363	393.059	896.508	109.315	310.488	912.019	84.1887	224.848	913.701	102.591	648.335	828.449	521.524	394.45	841.852	480.682	407.289	872.357	414.263	329.03	866.729	437.34	240.684	848.344	421.29
238	2.37	543.479	1254.63	263.131	596.941	1248.43	196.74	582.624	1245.54	331.136	716.288	1120.97	132.059	706.583	1117.83	394.776	613.131	1065.59	259.336	615.932	850.932	-21.736	374.458	897.997	42.0705	393.044	894.105	108.949	310.759	909.362	83.912	224.448	910.225	101.867	648.324	828.43	521.532	394.445	841.832	480.699	407.236	872.316	414.303	329.035	866.722	437.388	240.716	848.33	421.325
239	2.38	543.47	1254.51	263.079	596.997	1248.32	196.634	582.556	1245.47	331.06	716.349	1120.97	132.054	706.563	1117.81	394.811	613.214	1065.61	259.335	616.18	850.969	-21.8251	374.573	895.987	41.8804	392.83	891.711	108.688	310.695	906.712	83.3802	224.184	906.86	101.013	648.329	828.428	521.545	394.449	841.801	480.698	407.29	872.23	414.32	329.042	866.694	437.398	240.735	848.305	421.331
240	2.39	543.494	1254.41	263.013	596.99	1248.24	196.576	582.486	1245.43	330.985	716.438	1121	132.068	706.596	1117.8	394.818	613.281	1065.63	259.32	616.336	850.954	-21.9216	374.603	893.963	41.573	392.572	889.548	108.44	310.503	904.195	82.8339	223.979	903.713	100.15	648.37	828.427	521.565	394.457	841.783	480.693	407.296	872.225	414.333	329.073	866.673	437.385	240.756	848.297	421.337
241	2.4	543.478	1254.35	262.949	596.918	1248.19	196.537	582.453	1245.39	330.914	716.505	1121.04	132.06	706.611	1117.83	394.804	613.286	1065.66	259.302	616.468	850.899	-22.0169	374.43	892.018	41.2247	392.042	887.455	108.287	310.318	901.679	82.2776	223.685	900.64	99.2999	648.457	828.479	521.567	394.486	841.799	480.707	407.39	872.239	414.313	329.064	866.687	437.396	240.757	848.297	421.336
242	2.41	543.464	1254.32	262.885	596.899	1248.15	196.455	582.441	1245.36	330.805	716.532	1121.06	132.024	706.647	1117.86	394.786	613.253	1065.71	259.269	616.56	850.838	-22.0508	374.198	890.098	40.8384	391.426	885.67	108.222	309.969	899.275	81.7532	223.341	897.537	98.1664	648.443	828.508	521.52	394.51	841.814	480.716	407.368	872.279	414.321	329.043	866.711	437.398	240.729	848.319	421.327
243	2.42	543.446	1254.31	262.809	596.904	1248.13	196.39	582.491	1245.3	330.669	716.494	1121.04	131.979	706.711	1117.87	394.744	613.284	1065.74	259.219	616.638	850.795	-22.104	373.987	888.119	40.3925	390.729	883.947	108.149	309.601	896.824	81.2123	222.907	894.505	97.0473	648.464	828.526	521.484	394.514	841.818	480.704	407.369	872.276	414.332	329.051	866.698	437.361	240.71	848.326	421.304
244	2.43	543.491	1254.27	262.746	596.916	1248.08	196.311	582.606	1245.21	330.571	716.418	1121.03	131.918	706.719	1117.87	394.709	613.31	1065.75	259.195	616.759	850.751	-22.113	373.703	886.22	40.0418	390.594	882.001	107.573	309.305	894.509	80.5648	222.46	891.542	96.1474	648.488	828.556	521.487	394.505	841.81	480.698	407.34	872.28	414.299	329.042	866.687	437.334	240.715	848.304	421.283
245	2.44	543.533	1254.25	262.732	596.923	1248.03	196.243	582.664	1245.19	330.544	716.379	1121	131.859	706.716	1117.88	394.683	613.331	1065.72	259.207	616.858	850.671	-22.0672	373.522	884.408	39.6246	389.884	880.464	107.452	308.976	892.286	79.9788	222.206	888.584	95.1613	648.432	828.58	521.447	394.467	841.806	480.703	407.271	872.279	414.285	329.057	866.676	437.349	240.71	848.301	421.291
246	2.45	543.499	1254.27	262.748	596.857	1248.04	196.228	582.63	1245.19	330.527	716.284	1120.98	131.787	706.687	1117.89	394.654	613.258	1065.75	259.228	616.903	850.567	-21.9873	373.377	882.788	39.2162	389.642	878.898	107.062	308.582	890.195	79.4784	221.798	885.901	94.3059	648.401	828.597	521.401	394.454	841.808	480.685	407.28	872.262	414.276	329.069	866.689	437.369	240.677	848.321	421.302
247	2.46	543.436	1254.35	262.756	596.809	1248.06	196.197	582.489	1245.3	330.531	716.164	1120.96	131.706	706.651	1117.92	394.632	613.169	1065.79	259.249	616.978	850.426	-21.8719	373.001	881.204	38.9176	389.267	877.161	106.596	308.11	888.275	79.0704	221.345	883.457	93.7114	648.354	828.592	521.394	394.442	841.833	480.678	407.259	872.265	414.268	329.042	866.719	437.378	240.666	848.343	421.32
248	2.47	543.439	1254.42	262.736	596.803	1248.06	196.148	582.58	1245.31	330.484	716.094	1120.92	131.603	706.636	1117.94	394.591	613.143	1065.77	259.222	617.039	850.253	-21.755	372.696	879.696	38.5829	388.351	875.982	106.665	307.718	886.42	78.6381	220.908	881.15	93.1585	648.353	828.614	521.392	394.442	841.842	480.7	407.253	872.28	414.268	329.039	866.725	437.386	240.676	848.346	421.323
249	2.48	543.475	1254.49	262.717	596.837	1248.07	196.065	582.694	1245.34	330.441	716.018	1120.89	131.499	706.66	1117.99	394.546	613.149	1065.75	259.18	617.093	850.036	-21.6374	372.538	878.263	38.1746	388.121	874.652	106.319	307.327	884.703	78.2374	220.588	879.011	92.5427	648.376	828.64	521.364	394.471	841.835	480.691	407.297	872.276	414.261	329.058	866.707	437.371	240.687	848.331	421.307
250	2.49	543.477	1254.58	262.688	596.82	1248.07	195.972	582.768	1245.36	330.38	715.941	1120.86	131.406	706.65	1118.02	394.484	613.114	1065.76	259.136	617.124	849.792	-21.5208	372.342	876.832	37.8517	387.776	873.226	105.841	307.023	883.081	77.7885	220.155	876.983	91.9436	648.415	828.654	521.324	394.511	841.834	480.678	407.359	872.261	414.239	329.069	866.712	437.356	240.712	848.314	421.303
251	2.5	543.453	1254.65	262.659	596.743	1248.07	195.917	582.779	1245.45	330.344	715.814	1120.81	131.292	706.633	1118.05	394.425	613.062	1065.75	259.107	617.22	849.578	-21.4048	372.034	875.423	37.5876	386.867	872.264	105.726	306.773	881.499	77.2891	219.776	874.989	91.4153	648.464	828.677	521.316	394.528	841.819	480.684	407.405	872.239	414.247	329.082	866.699	437.352	240.72	848.302	421.317
252	2.51	543.501	1254.7	262.635	596.695	1248.06	195.837	582.865	1245.48	330.296	715.655	1120.73	131.198	706.633	1118.07	394.371	613.015	1065.72	259.104	617.261	849.336	-21.2906	371.799	873.999	37.2148	386.366	871.326	105.489	306.479	880.002	76.9025	219.414	873.029	90.8844	648.51	828.702	521.315	394.529	841.799	480.686	407.396	872.213	414.24	329.074	866.68	437.357	240.75	848.29	421.338
253	2.52	543.521	1254.73	262.616	596.646	1248.02	195.751	583.895	1245.26	329.978	715.47	1120.67	131.074	706.647	1118.08	394.301	612.998	1065.67	259.111	617.256	849.057	-21.1828	371.517	872.659	36.8574	385.994	870.266	105.243	306.219	878.484	76.5226	219.018	871.177	90.3936	648.496	828.73	521.299	394.515	841.797	480.692	407.403	872.201	414.216	329.1	866.672	437.375	240.756	848.277	421.339
254	2.53	543.495	1254.76	262.576	596.517	1247.98	195.665	586.058	1244.78	329.369	715.221	1120.61	130.952	706.63	1118.09	394.211	612.908	1065.65	259.131	617.239	848.798	-21.0858	371.164	871.334	36.6369	385.761	869.123	104.962	306.01	877.103	76.1684	218.672	869.284	89.9406	648.482	828.772	521.272	394.474	841.777	480.701	407.364	872.21	414.235	329.075	866.676	437.405	240.72	848.273	421.334
255	2.54	543.432	1254.81	262.527	596.412	1247.95	195.556	586.627	1244.71	329.175	714.948	1120.55	130.826	706.617	1118.13	394.13	612.808	1065.62	259.153	617.138	848.534	-20.9552	370.829	870.151	36.5099	385.511	868.062	104.761	305.753	875.788	75.9962	218.379	867.624	89.6064	648.506	828.81	521.25	394.438	841.778	480.715	407.29	872.246	414.256	329.035	866.693	437.42	240.68	848.289	421.343
256	2.55	543.402	1254.87	262.44	596.348	1247.92	195.423	586.737	1244.77	329.082	714.735	1120.52	130.662	706.66	1118.16	394.055	612.704	1065.62	259.154	616.979	848.216	-20.8017	370.692	869.049	36.3104	385.263	867.143	104.585	305.471	874.528	75.9747	218.201	866.019	89.3808	648.499	828.864	521.201	394.444	841.783	480.727	407.273	872.267	414.261	329.063	866.696	437.423	240.682	848.312	421.345
257	2.56	543.39	1254.91	262.312	596.287	1247.89	195.263	586.656	1244.94	328.96	714.494	1120.5	130.487	706.691	1118.19	393.965	612.605	1065.62	259.14	616.898	847.939	-20.7074	370.525	867.923	36.1803	384.895	866.096	104.519	305.328	873.308	75.9375	218.123	864.49	89.3637	648.49	828.897	521.119	394.483	841.795	480.726	407.294	872.284	414.262	329.063	866.708	437.416	240.696	848.322	421.329
258	2.57	543.337	1254.94	262.176	596.166	1247.83	195.096	586.651	1245.09	328.811	714.269	1120.46	130.331	706.734	1118.22	393.85	612.512	1065.62	259.113	616.808	847.699	-20.6063	370.292	866.75	36.1241	384.474	864.904	104.508	305.084	872.055	75.9924	218.024	863.097	89.5882	648.582	828.929	521.047	394.478	841.823	480.726	407.345	872.301	414.255	329.046	866.726	437.405	240.669	848.352	421.32
259	2.58	543.255	1254.97	262.03	596.073	1247.78	194.899	586.801	1245.17	328.608	714.082	1120.43	130.164	706.761	1118.22	393.744	612.426	1065.59	259.095	616.677	847.498	-20.4834	370.095	865.599	36.0842	384.308	863.82	104.347	304.796	870.818	76.1184	217.752	861.65	89.9842	648.614	828.937	520.979	394.497	841.833	480.72	407.333	872.304	414.244	329.048	866.744	437.413	240.672	848.362	421.313
260	2.59	543.157	1255	261.869	595.945	1247.7	194.71	586.897	1245.22	328.38	713.927	1120.35	130.037	706.806	1118.22	393.666	612.349	1065.57	259.102	616.473	847.301	-20.3127	369.801	864.488	36.0511	384.083	862.988	104.226	304.56	869.639	76.1811	217.478	859.968	90.4584	648.639	828.911	520.908	394.541	841.81	480.718	407.385	872.234	414.244	329.051	866.735	437.434	240.721	848.347	421.31
261	2.6	543.054	1254.99	261.681	595.802	1247.59	194.501	585.926	1245.52	328.459	713.781	1120.27	129.97	706.838	1118.19	393.616	612.33	1065.49	259.123	616.259	847.137	-20.197	369.363	863.403	35.9728	383.756	862.195	104.106	304.295	868.671	76.1317	217.178	858.248	91.0134	648.655	828.874	520.862	394.534	841.764	480.75	407.403	872.183	414.249	329.075	866.709	437.47	240.776	848.319	421.343
262	2.61	542.999	1254.94	261.477	595.697	1247.44	194.276	583.764	1246.06	328.823	713.666	1120.21	129.891	706.864	1118.18	393.565	612.337	1065.42	259.145	616.093	846.996	-20.1321	369.063	862.428	35.7903	383.509	861.682	103.911	304.078	868.164	75.9453	216.86	856.844	91.3957	648.631	828.848	520.786	395.022	841.392	480.69	407.379	872.094	414.269	329.086	866.679	437.506	240.791	848.296	421.383
263	2.62	542.935	1254.89	261.237	595.571	1247.29	194.059	583.174	1246.25	328.769	713.576	1120.18	129.824	706.926	1118.2	393.508	612.314	1065.34	259.156	615.945	846.825	-20.0805	368.956	861.937	35.5699	383.316	861.601	103.699	303.957	868.061	75.726	216.629	856.09	91.3835	648.669	828.836	520.722	395.614	840.969	480.611	407.38	872.052	414.277	329.113	866.653	437.546	240.803	848.283	421.393
264	2.63	542.808	1254.83	260.96	595.521	1247.12	193.803	583.064	1246.26	328.565	713.492	1120.16	129.748	706.986	1118.21	393.449	612.302	1065.24	259.141	615.867	846.669	-20.0987	368.945	861.902	35.344	383.233	861.782	103.465	303.913	868.08	75.4758	216.568	856.187	91.0019	648.696	828.86	520.652	394.787	841.524	480.745	407.382	872.059	414.261	329.117	866.657	437.533	240.791	848.266	421.367
265	2.64	542.639	1254.79	260.658	595.439	1246.93	193.526	583.055	1246.26	328.275	713.403	1120.16	129.664	707.03	1118.21	393.391	612.32	1065.16	259.091	615.799	846.547	-20.1151	368.987	862.006	35.0973	383.185	861.992	103.256	303.916	868.117	75.3029	216.607	856.686	90.6811	648.738	828.906	520.576	394.597	841.69	480.771	407.405	872.109	414.238	329.12	866.663	437.507	240.77	848.275	421.34
266	2.65	542.433	1254.77	260.323	595.35	1246.78	193.244	582.951	1246.33	327.947	713.387	1120.2	129.591	707.098	1118.23	393.314	612.314	1065.14	259.045	615.724	846.515	-20.1276	369.044	862.094	34.9007	383.166	862.119	103.089	303.866	868.117	75.2504	216.631	857.04	90.7717	648.735	828.964	520.488	394.553	841.75	480.749	407.316	872.201	414.225	329.101	866.707	437.483	240.74	848.315	421.317
267	2.66	542.257	1254.72	260.033	595.279	1246.61	192.893	582.777	1246.44	327.664	713.404	1120.22	129.547	707.173	1118.25	393.262	612.323	1065.11	259.02	615.762	846.591	-20.2083	369.004	862.164	34.8287	383.162	862.153	102.999	303.774	867.996	75.3544	216.672	856.93	91.2385	648.753	828.996	520.419	394.556	841.784	480.734	407.259	872.262	414.187	329.084	866.753	437.469	240.716	848.353	421.307
268	2.67	542.169	1254.65	259.77	595.259	1246.41	192.497	582.569	1246.55	327.373	713.456	1120.24	129.513	707.215	1118.26	393.233	612.355	1065.09	258.984	615.807	846.68	-20.3166	368.93	862.207	34.7977	383.172	862.108	102.96	303.685	867.786	75.5597	216.736	856.366	91.8601	648.807	829.039	520.413	394.556	841.805	480.709	407.249	872.261	414.188	329.096	866.767	437.444	240.713	848.36	421.299
269	2.68	542.167	1254.55	259.466	595.227	1246.22	192.061	582.527	1246.6	326.998	713.504	1120.24	129.484	707.3	1118.24	393.217	612.496	1065.04	258.945	615.868	846.816	-20.4528	368.877	862.189	34.7863	383.193	861.998	102.947	303.599	867.528	75.7827	216.776	855.567	92.4602	648.815	829.042	520.415	394.58	841.785	480.689	407.31	872.196	414.178	329.137	866.753	437.421	240.742	848.355	421.294
270	2.69	542.175	1254.43	259.135	595.094	1246.03	191.664	582.439	1246.7	326.635	713.592	1120.24	129.451	707.375	1118.22	393.203	612.622	1065.01	258.922	615.955	846.968	-20.609	368.895	862.128	34.7463	383.188	861.878	102.977	303.5	867.269	75.9826	216.801	854.816	92.8805	648.789	829.048	520.403	394.589	841.774	480.673	407.368	872.119	414.155	329.15	866.73	437.42	240.759	848.359	421.283
271	2.7	542.211	1254.32	258.796	594.968	1245.83	191.319	582.24	1246.81	326.293	713.682	1120.25	129.427	707.451	1118.2	393.197	612.677	1064.97	258.929	615.953	847.091	-20.7219	368.809	862.1	34.7748	383.142	861.81	103.01	303.434	867.07	76.114	216.785	854.201	93.0737	648.723	829.064	520.405	394.592	841.781	480.689	407.394	872.077	414.148	329.139	866.722	437.446	240.775	848.354	421.293
272	2.71	542.381	1254.18	258.363	594.926	1245.63	190.999	582.187	1246.88	325.916	713.758	1120.25	129.39	707.537	1118.18	393.198	612.737	1064.91	258.921	615.957	847.18	-20.7788	368.804	862.07	34.7666	383.111	861.77	103.028	303.382	866.947	76.156	216.758	853.696	93.0944	648.677	829.071	520.412	394.608	841.773	480.711	407.344	872.106	414.152	329.149	866.719	437.455	240.771	848.343	421.306
273	2.72	542.532	1254.05	257.842	594.883	1245.46	190.667	582.198	1247.01	325.49	713.813	1120.25	129.339	707.622	1118.17	393.172	612.83	1064.85	258.867	615.913	847.194	-20.7791	368.836	861.999	34.7215	383.093	861.737	103.017	303.321	866.846	76.1478	216.72	853.244	93.0212	648.663	829.127	520.437	394.588	841.762	480.721	407.319	872.117	414.167	329.148	866.708	437.449	240.766	848.327	421.292
274	2.73	542.555	1253.98	257.31	594.838	1245.31	190.338	582.231	1247.13	325.055	713.868	1120.24	129.304	707.744	1118.16	393.141	612.929	1064.8	258.82	615.882	847.133	-20.7604	368.785	861.904	34.7082	383.066	861.737	102.98	303.268	866.745	76.1441	216.682	852.813	92.9681	648.622	829.184	520.457	394.575	841.771	480.734	407.328	872.149	414.166	329.117	866.706	437.47	240.719	848.325	421.28
275	2.74	542.545	1253.93	256.834	594.817	1245.12	190.017	583.519	1246.94	324.394	713.918	1120.22	129.285	707.848	1118.15	393.128	612.962	1064.78	258.815	615.745	846.999	-20.6647	368.79	861.793	34.6942	383.018	861.745	102.996	303.227	866.664	76.1606	216.602	852.373	92.9618	648.628	829.289	520.514	394.579	841.773	480.768	407.3	872.193	414.192	329.099	866.704	437.53	240.67	848.328	421.299
276	2.75	542.495	1253.92	256.399	594.831	1244.94	189.637	586.088	1246.47	323.376	713.952	1120.17	129.262	707.948	1118.11	393.1	613.022	1064.73	258.805	615.655	846.877	-20.5151	368.819	861.681	34.6502	382.994	861.694	103.01	303.181	866.58	76.148	216.495	851.948	92.9981	648.585	829.395	520.567	394.563	841.765	480.788	407.23	872.228	414.256	329.091	866.716	437.582	240.645	848.335	421.304
277	2.76	542.464	1253.93	255.972	594.909	1244.75	189.15	585.824	1246.67	322.978	714.051	1120.12	129.235	708.041	1118.08	393.073	613.081	1064.67	258.757	615.653	846.735	-20.3428	368.78	861.565	34.6556	382.983	861.609	103.002	303.141	866.516	76.1293	216.397	851.555	93.057	648.489	829.509	520.612	394.532	841.742	480.776	407.089	872.272	414.304	329.049	866.718	437.61	240.626	848.322	421.296
278	2.77	542.466	1253.97	255.58	595.022	1244.57	188.669	583.74	1247.33	323.08	714.197	1120.05	129.166	708.123	1118.07	393.037	613.132	1064.64	258.711	615.632	846.622	-20.1857	368.767	861.467	34.6981	382.968	861.538	103.011	303.129	866.459	76.127	216.311	851.245	93.1342	648.365	829.636	520.598	394.525	841.74	480.758	407.025	872.312	414.319	329.034	866.729	437.652	240.583	848.326	421.306
279	2.78	542.503	1254.05	255.224	595.159	1244.47	188.219	583.248	1247.63	322.842	714.316	1120	129.094	708.172	1118.08	393.034	613.173	1064.64	258.683	615.575	846.517	-20.0086	368.794	861.402	34.7563	382.975	861.477	103.06	303.134	866.418	76.1723	216.234	851.01	93.2269	648.289	829.767	520.567	394.566	841.78	480.767	406.946	872.435	414.349	329.02	866.747	437.757	240.537	848.37	421.346
280	2.79	542.566	1254.17	254.863	595.291	1244.4	187.794	583.27	1247.79	322.54	714.457	1119.94	128.99	708.164	1118.12	393.027	613.229	1064.65	258.614	615.504	846.381	-19.8259	368.839	861.32	34.776	382.967	861.388	103.134	303.119	866.397	76.2141	216.133	850.85	93.3315	648.196	829.9	520.522	394.599	841.852	480.784	406.831	872.636	414.402	328.969	866.792	437.886	240.481	848.396	421.402
281	2.8	542.74	1254.25	254.463	595.507	1244.32	187.324	583.372	1247.95	322.184	714.627	1119.88	128.89	708.15	1118.19	393.014	613.293	1064.67	258.486	615.521	846.277	-19.721	368.899	861.239	34.7665	382.98	861.298	103.153	303.121	866.401	76.2154	216.17	850.7	93.343	648.123	830.075	520.453	394.619	841.959	480.754	406.708	872.864	414.469	328.945	866.823	438.022	240.416	848.392	421.458
282	2.81	543.017	1254.28	254.085	595.724	1244.24	186.87	583.515	1248.09	321.819	714.833	1119.85	128.808	708.145	1118.28	392.994	613.413	1064.67	258.344	615.532	846.178	-19.639	368.957	861.182	34.7653	383.034	861.217	103.145	303.163	866.398	76.2137	216.201	850.606	93.3782	648.031	830.274	520.392	395.156	841.783	480.597	406.604	873.124	414.562	328.923	866.866	438.203	240.374	848.383	421.548
283	2.82	543.31	1254.36	253.747	595.891	1244.19	186.48	583.746	1248.26	321.494	715.012	1119.81	128.71	708.085	1118.43	392.962	613.52	1064.67	258.226	615.507	846.097	-19.5485	369.003	861.135	34.798	383.082	861.165	103.171	303.21	866.388	76.2349	216.168	850.549	93.4179	647.917	830.514	520.381	396.291	841.235	480.308	406.581	873.406	414.691	328.849	866.941	438.455	240.293	848.417	421.699
284	2.83	543.61	1254.51	253.466	596.007	1244.18	186.193	584.014	1248.54	321.164	715.137	1119.78	128.624	708.005	1118.58	392.92	613.626	1064.66	258.11	615.5	846.043	-19.4485	368.953	861.088	34.8459	383.08	861.102	103.216	303.227	866.379	76.2591	216.158	850.452	93.4249	647.859	830.776	520.418	396.533	841.259	480.166	406.596	873.797	414.848	328.768	867.067	438.752	240.136	848.526	421.903
285	2.84	543.969	1254.68	253.211	596.109	1244.17	185.901	584.344	1248.8	320.817	715.279	1119.73	128.544	707.941	1118.72	392.863	613.738	1064.61	257.995	615.513	846.001	-19.3695	368.954	861.039	34.8684	383.088	861.045	103.233	303.218	866.356	76.2713	216.105	850.364	93.4335	647.793	831.104	520.509	396.524	841.433	480.022	406.539	874.322	415.084	328.623	867.251	439.114	239.991	848.796	422.169
286	2.85	544.355	1254.86	252.979	596.209	1244.16	185.632	585.845	1248.74	320.226	715.356	1119.67	128.449	707.864	1118.87	392.763	613.865	1064.53	257.872	615.506	845.913	-19.3245	369.001	860.943	34.8653	383.095	860.984	103.266	303.214	866.336	76.2721	216.094	850.247	93.405	647.691	831.476	520.654	396.406	841.629	479.885	406.292	875.034	415.369	328.494	867.488	439.508	239.928	849.417	422.452
287	2.86	544.706	1255.09	252.818	596.278	1244.2	185.374	587.658	1248.6	319.611	715.43	1119.63	128.339	707.732	1119.07	392.629	613.97	1064.46	257.737	615.539	845.831	-19.33	368.977	860.864	34.9064	383.063	860.944	103.287	303.219	866.295	76.2713	216.018	850.119	93.364	647.546	831.882	520.844	396.237	841.856	479.746	405.913	875.996	415.67	328.37	867.902	439.945	239.865	850.914	422.774
288	2.87	544.97	1255.4	252.714	596.315	1244.3	185.15	586.35	1249.27	319.848	715.522	1119.58	128.209	707.583	1119.31	392.478	614.004	1064.41	257.604	615.512	845.769	-19.3307	368.962	860.828	34.9381	383.06	860.895	103.291	303.2	866.29	76.2704	215.989	850.029	93.3376	647.381	832.293	521.044	396.013	842.144	479.601	405.553	877.155	416.078	328.085	868.74	440.382	239.732	853.51	423.078
289	2.88	545.184	1255.76	252.656	596.402	1244.44	184.914	586.313	1249.72	319.833	715.559	1119.53	128.063	707.466	1119.5	392.309	614.065	1064.39	257.439	615.533	845.684	-19.3587	368.972	860.789	34.9585	383.036	860.868	103.339	303.192	866.31	76.2638	216.005	849.964	93.3248	647.303	832.708	521.264	395.785	842.586	479.501	405.766	878.488	416.661	327.699	870.134	440.837	239.61	856.651	423.253
290	2.89	545.43	1256.13	252.629	596.417	1244.6	184.742	586.677	1250.15	319.782	715.633	1119.51	127.909	707.331	1119.69	392.125	614.165	1064.4	257.256	615.602	845.597	-19.4046	368.971	860.775	34.9902	383.046	860.836	103.338	303.216	866.323	76.2706	215.99	849.895	93.3267	647.28	833.09	521.459	395.56	843.204	479.424	406.056	880.235	417.334	327.74	871.901	441.518	239.502	860.451	423.44
291	2.9	545.714	1256.52	252.656	596.437	1244.77	184.63	587.136	1250.54	319.734	715.651	1119.46	127.734	707.172	1119.84	391.915	614.192	1064.42	257.074	615.61	845.506	-19.4674	368.993	860.805	34.9774	383.079	860.796	103.326	303.233	866.324	76.2817	215.971	849.84	93.3294	647.239	833.425	521.618	395.407	844.039	479.339	406.356	882.412	418.042	327.912	874.363	442.317	239.57	865.015	423.745
292	2.91	545.963	1256.94	252.753	596.428	1244.97	184.581	587.499	1250.93	319.752	715.629	1119.41	127.578	707.072	1120	391.702	614.087	1064.44	256.939	615.592	845.404	-19.5193	368.989	860.811	34.9781	383.077	860.788	103.337	303.254	866.324	76.282	215.979	849.815	93.3498	647.208	833.696	521.763	395.251	845.292	479.355	406.895	884.925	418.966	328.249	877.275	443.292	239.692	870.417	424.332
293	2.92	546.177	1257.38	252.924	596.406	1245.21	184.56	587.709	1251.3	319.844	715.611	1119.37	127.402	707.012	1120.12	391.479	613.942	1064.43	256.826	615.587	845.326	-19.5896	368.947	860.786	35.01	383.081	860.782	103.352	303.278	866.324	76.2861	215.935	849.787	93.4056	647.152	833.885	521.849	395.191	847.046	479.526	407.037	888.084	420.074	328.395	880.523	444.434	239.747	876.304	425.268
294	2.93	546.356	1257.81	253.141	596.34	1245.39	184.568	589.296	1251.19	319.641	715.538	1119.34	127.234	707.026	1120.22	391.245	613.833	1064.34	256.754	615.589	845.223	-19.7177	368.957	860.738	35.0175	383.065	860.761	103.356	303.284	866.314	76.3161	215.902	849.731	93.4594	647.006	833.998	521.819	395.065	849.224	479.723	407.447	891.533	421.342	328.405	884.108	445.472	239.871	881.908	426.498
295	2.94	546.597	1258.2	253.408	596.27	1245.54	184.638	592.676	1250.64	319.02	715.472	1119.31	127.128	707.082	1120.35	391.039	613.721	1064.24	256.711	615.616	845.075	-19.858	368.935	860.691	35.047	383.047	860.717	103.366	303.281	866.308	76.3497	215.909	849.642	93.4971	646.851	834.098	521.678	394.652	851.968	479.752	408.104	895.411	422.547	328.703	888.233	446.306	240.234	887.595	427.588
296	2.95	546.869	1258.54	253.73	596.202	1245.73	184.746	593.973	1250.69	318.985	715.367	1119.3	127.033	707.2	1120.48	390.852	613.654	1064.14	256.684	615.643	844.97	-19.9857	368.882	860.647	35.0781	383.112	860.65	103.37	303.286	866.301	76.3823	215.895	849.56	93.548	646.617	834.225	521.489	394.047	855.115	479.537	408.662	899.679	423.655	329.16	892.909	446.753	240.693	893.824	428.033
297	2.96	547.139	1258.86	254.089	596.111	1245.92	184.885	594.783	1250.89	319.069	715.219	1119.28	126.922	707.352	1120.6	390.68	613.629	1064.09	256.666	615.648	844.921	-20.0816	368.923	860.601	35.0827	383.161	860.612	103.397	303.323	866.282	76.4098	215.906	849.505	93.5801	646.245	834.376	521.288	393.423	858.74	479.213	409.338	904.342	424.57	329.541	898.083	446.793	241.187	900.446	427.962
298	2.97	547.364	1259.16	254.457	596.008	1246.1	185.045	595.354	1251.15	319.154	715.115	1119.27	126.798	707.551	1120.73	390.515	613.602	1064.09	256.656	615.607	844.852	-20.175	368.919	860.592	35.0869	383.174	860.624	103.42	303.324	866.292	76.4321	215.862	849.479	93.6018	645.836	834.602	521.13	392.941	862.854	478.783	410.389	909.377	425.331	329.787	903.667	446.468	241.816	907.667	427.272
299	2.98	547.548	1259.43	254.847	595.925	1246.26	185.248	595.667	1251.39	319.327	714.999	1119.27	126.717	707.816	1120.85	390.347	613.529	1064.12	256.719	615.535	844.835	-20.2538	368.884	860.607	35.1246	383.128	860.629	103.473	303.313	866.297	76.4731	215.802	849.436	93.6605	645.324	834.97	521.068	392.547	867.316	478.188	411.266	914.92	426.033	330.349	909.479	445.923	242.758	915.344	426.013
300	2.99	547.699	1259.67	255.231	595.859	1246.4	185.502	595.836	1251.62	319.606	714.865	1119.29	126.669	708.082	1120.98	390.198	613.437	1064.16	256.818	615.442	844.805	-20.2929	368.831	860.642	35.2001	383.054	860.64	103.561	303.294	866.312	76.5314	215.764	849.422	93.7185	644.631	835.517	521.143	392.152	872.048	477.301	411.684	920.977	426.778	330.989	915.572	445.238	243.942	923.315	424.309
301	3	547.885	1259.85	255.593	595.814	1246.46	185.723	595.954	1251.84	319.932	714.726	1119.32	126.607	708.338	1121.13	390.038	613.44	1064.17	256.875	615.437	844.832	-20.3881	368.802	860.65	35.2368	382.999	860.661	103.608	303.298	866.314	76.5577	215.76	849.396	93.7391	643.806	836.058	521.281	391.8	876.958	476.087	412.762	926.996	427.131	331.704	922.091	444.39	244.976	931.648	422.158
302	3.01	548.012	1259.99	255.909	595.737	1246.5	185.924	596.099	1251.96	320.253	714.628	1119.32	126.537	708.621	1121.27	389.859	613.469	1064.17	256.916	615.429	844.868	-20.4686	368.836	860.611	35.2231	383.019	860.638	103.611	303.296	866.305	76.5604	215.746	849.342	93.7291	642.843	836.558	521.571	391.585	882.032	474.638	414.255	933.203	427.52	332.668	928.811	443.272	245.972	940.045	419.73
303	3.02	548.089	1260.1	256.247	595.64	1246.53	186.126	596.291	1252.01	320.619	714.533	1119.31	126.475	708.908	1121.44	389.68	613.55	1064.15	256.951	615.399	844.87	-20.5281	368.775	860.603	35.2679	383.036	860.62	103.634	303.283	866.295	76.5778	215.693	849.333	93.7255	641.559	837.168	522.022	391.314	887.46	473.023	415.657	939.642	428.075	333.506	935.753	441.973	247.626	948.166	417.19
304	3.03	548.113	1260.2	256.684	595.642	1246.53	186.388	596.638	1252.04	320.948	714.474	1119.3	126.479	709.167	1121.62	389.497	613.689	1064.18	257.022	615.383	844.903	-20.5731	368.744	860.614	35.3188	383.015	860.585	103.664	303.28	866.281	76.6031	215.686	849.3	93.709	640.083	837.947	522.534	390.88	893.263	471.319	417.011	946.561	428.752	334.456	942.878	440.515	249.47	956.281	414.159
305	3.04	548.159	1260.24	257.163	595.591	1246.53	186.643	597.023	1252.04	321.225	714.452	1119.29	126.437	709.482	1121.81	389.295	613.9	1064.17	257.083	615.369	844.921	-20.6299	368.753	860.579	35.3282	383.004	860.518	103.675	303.314	866.264	76.6192	215.687	849.261	93.6898	638.533	838.785	523.023	390.65	899.176	469.363	418.726	953.527	429.411	335.768	950.152	438.91	251.313	964.637	410.652
306	3.05	548.239	1260.22	257.663	595.468	1246.52	186.916	597.447	1252.01	321.469	714.468	1119.29	126.394	709.816	1122.02	389.084	614.099	1064.18	257.131	615.355	844.96	-20.7144	368.787	860.525	35.2994	383.029	860.47	103.645	303.324	866.245	76.6196	215.681	849.244	93.6851	637.018	839.661	523.456	390.462	905.315	467.376	420.429	960.572	430.029	337.107	957.65	436.897	253.513	973.091	406.519
307	3.06	548.352	1260.19	258.161	595.325	1246.51	187.247	597.942	1251.9	321.732	714.778	1119.31	126.461	710.21	1122.26	388.886	614.28	1064.21	257.203	615.273	844.973	-20.7609	368.846	860.478	35.283	383.095	860.433	103.642	303.346	866.238	76.6232	215.705	849.219	93.6779	635.153	840.642	524.027	390.971	911.337	465.049	422.492	967.682	430.687	338.638	965.409	434.719	256.376	981.797	401.689
308	3.07	548.473	1260.16	258.625	595.081	1246.52	187.634	598.453	1251.72	321.986	715.378	1119.31	126.635	710.592	1122.49	388.698	614.441	1064.26	257.262	615.286	845.002	-20.7533	368.867	860.475	35.3184	383.102	860.421	103.668	303.39	866.23	76.6413	215.733	849.214	93.6832	633.291	841.648	524.631	392.502	917.395	462.104	424.655	974.821	431.353	340.746	973.118	432.501	259.523	990.884	396.617
309	3.08	548.519	1260.14	259.069	594.758	1246.55	188.059	598.849	1251.55	322.238	715.344	1119.31	126.625	710.965	1122.71	388.508	614.575	1064.36	257.337	615.318	845.049	-20.6974	368.84	860.493	35.3745	383.05	860.431	103.708	303.408	866.232	76.6665	215.728	849.245	93.7055	631.508	842.721	525.105	393.324	923.773	459.401	426.602	982.032	431.884	343.11	980.672	429.86	263.073	1000.12	391.099
310	3.09	548.505	1260.15	259.481	594.448	1246.56	188.479	599.026	1251.49	322.503	714.949	1119.35	126.52	711.249	1122.92	388.333	614.626	1064.49	257.41	615.32	845.062	-20.6345	368.828	860.513	35.4145	383.069	860.438	103.728	303.403	866.233	76.6737	215.698	849.296	93.6875	629.476	843.858	525.695	394.279	930.334	456.428	429.125	988.951	432.264	345.286	989.034	427.039	267.341	1009.58	385.336
311	3.1	548.505	1260.17	259.857	594.273	1246.58	188.855	599.067	1251.48	322.802	714.915	1119.36	126.546	711.464	1123.14	388.187	614.679	1064.6	257.512	615.37	845.088	-20.5563	368.823	860.528	35.4194	383.054	860.428	103.758	303.38	866.245	76.6717	215.684	849.353	93.6656	627.376	845.104	526.356	395.297	937.045	453.225	431.841	995.986	432.512	348.333	997.191	424.036	272.29	1019.79	379.806
312	3.11	548.466	1260.21	260.2	594.141	1246.61	189.18	598.94	1251.51	323.159	714.944	1119.37	126.619	711.613	1123.37	388.04	614.744	1064.64	257.609	615.448	845.104	-20.4809	368.82	860.523	35.4246	383.062	860.418	103.775	303.393	866.255	76.6782	215.72	849.424	93.6159	625.4	846.521	526.947	396.536	943.842	449.961	434.871	1002.91	432.67	351.769	1005.39	420.734	277.849	1030.45	374.289
313	3.12	548.38	1260.28	260.556	594.019	1246.65	189.452	598.606	1251.62	323.589	714.973	1119.4	126.685	711.731	1123.63	387.866	614.771	1064.67	257.714	615.47	845.101	-20.3621	368.835	860.505	35.4233	383.065	860.405	103.769	303.388	866.273	76.6571	215.731	849.495	93.5354	623.309	847.918	527.695	398.04	950.684	446.465	438.106	1009.67	432.551	355.541	1013.75	417.486	283.863	1041.46	368.686
314	3.13	548.275	1260.37	260.902	593.881	1246.7	189.683	598.207	1251.82	324.025	714.971	1119.42	126.745	711.829	1123.88	387.689	614.771	1064.71	257.8	615.459	845.058	-20.2323	368.83	860.483	35.373	383.085	860.4	103.732	303.38	866.287	76.6055	215.731	849.571	93.4221	621.05	849.419	528.419	400.004	957.573	442.684	441.464	1016.2	432.371	359.586	1022.07	414.133	290.418	1052.52	363.081
315	3.14	548.229	1260.42	261.243	593.831	1246.73	189.908	598.157	1251.88	324.372	715.004	1119.44	126.85	711.951	1124.09	387.531	614.878	1064.67	257.885	615.54	844.999	-20.1106	368.897	860.453	35.3469	383.124	860.382	103.685	303.392	866.292	76.58	215.748	849.62	93.3334	618.767	850.922	529.042	401.887	964.563	439.033	444.969	1022.59	432.077	363.977	1030.41	410.694	297.361	1063.34	357.461
316	3.15	548.174	1260.47	261.575	593.794	1246.77	190.134	598.163	1251.93	324.684	715.008	1119.46	126.96	712.097	1124.31	387.381	614.955	1064.65	257.991	615.637	844.946	-19.9543	368.955	860.431	35.3447	383.173	860.368	103.65	303.4	866.295	76.5585	215.812	849.622	93.2908	616.241	852.519	529.727	402.763	971.907	435.581	448.435	1028.86	431.6	368.749	1038.55	407.122	305.003	1074.14	351.878
317	3.16	548.039	1260.54	261.903	593.731	1246.81	190.344	598.131	1251.96	324.963	714.965	1119.45	127.082	712.204	1124.51	387.256	614.956	1064.67	258.103	615.667	844.897	-19.8044	368.942	860.422	35.3502	383.166	860.371	103.638	303.413	866.288	76.554	215.819	849.646	93.2613	613.677	854.027	530.267	405.656	978.61	431.756	451.963	1034.92	430.967	373.336	1046.55	403.605	313.683	1085.1	346.559
318	3.17	547.921	1260.59	262.226	593.628	1246.86	190.562	598.283	1251.88	325.161	714.884	1119.44	127.21	712.281	1124.7	387.128	614.912	1064.71	258.226	615.708	844.915	-19.662	368.934	860.434	35.3498	383.117	860.38	103.662	303.399	866.278	76.5584	215.785	849.68	93.2459	610.912	855.529	530.855	408.556	985.345	428.002	455.757	1040.64	430.212	378.13	1054.35	400.146	321.956	1095.41	341.236
319	3.18	547.92	1260.6	262.556	593.552	1246.91	190.829	598.496	1251.79	325.412	714.873	1119.45	127.35	712.347	1124.86	386.994	614.95	1064.74	258.389	615.787	844.95	-19.4921	368.957	860.465	35.3925	383.074	860.364	103.742	303.411	866.27	76.5932	215.799	849.699	93.25	608.245	857.142	531.505	411.744	991.859	424.256	459.937	1046.18	429.403	383.296	1061.97	396.639	331.006	1105.37	336.129
320	3.19	547.9	1260.61	262.875	593.447	1246.98	191.155	598.599	1251.7	325.686	714.848	1119.45	127.481	712.456	1125	386.877	614.792	1064.93	258.458	615.791	844.948	-19.2894	368.976	860.495	35.4686	383.068	860.347	103.845	303.416	866.263	76.6199	215.801	849.676	93.2868	605.919	858.8	532.016	415.013	998.158	420.577	464.311	1051.34	428.526	388.745	1069.32	393.027	340.236	1114.96	331.312
321	3.2	547.891	1260.61	263.157	593.331	1247.01	191.47	598.665	1251.61	325.932	714.833	1119.45	127.573	712.546	1125.13	386.74	614.012	1065.33	258.181	615.778	844.91	-19.1538	369.005	860.503	35.491	383.052	860.334	103.864	303.399	866.252	76.6391	215.764	849.646	93.287	603.396	860.47	532.511	418.333	1004.28	416.895	468.616	1056.21	427.414	394.654	1076.39	389.443	349.757	1124.04	326.591
322	3.21	547.917	1260.6	263.394	593.27	1247.07	191.742	598.775	1251.55	326.155	714.81	1119.46	127.652	712.67	1125.26	386.593	613.27	1065.34	257.916	615.831	844.842	-19.1172	369.041	860.481	35.4831	383.13	860.285	103.831	303.422	866.248	76.6348	215.788	849.595	93.2493	600.689	862.028	532.759	422.268	1010	413.236	472.569	1060.93	426.107	400.66	1083.1	385.877	359.446	1132.65	321.94
323	3.22	547.971	1260.6	263.685	593.142	1247.16	192.064	598.979	1251.45	326.374	714.786	1119.46	127.712	712.898	1125.38	386.452	613.908	1064.97	258.287	615.87	844.75	-19.0086	369.076	860.479	35.4704	383.179	860.259	103.82	303.459	866.228	76.6203	215.784	849.554	93.2208	598.176	863.575	532.895	426.039	1015.43	409.6	476.505	1065.33	424.984	406.691	1089.43	382.464	369.326	1140.61	317.498
324	3.23	547.987	1260.66	264.02	593.012	1247.28	192.428	599.084	1251.38	326.641	714.762	1119.45	127.735	713.102	1125.47	386.279	614.758	1064.75	258.769	615.901	844.685	-18.8858	369.109	860.478	35.4515	383.182	860.273	103.837	303.472	866.236	76.6173	215.785	849.508	93.2093	595.65	865.181	533.052	429.718	1020.6	406.097	479.923	1069.38	424.036	413.338	1095.13	378.929	379.456	1147.91	313.326
325	3.24	547.931	1260.73	264.35	592.885	1247.43	192.775	598.881	1251.4	326.918	714.733	1119.45	127.752	713.302	1125.55	386.117	615.336	1064.84	259.034	615.919	844.638	-18.8274	369.138	860.442	35.422	383.119	860.293	103.845	303.451	866.25	76.5911	215.774	849.468	93.1839	593.225	866.674	533.185	433.603	1025.4	402.59	482.755	1073.38	423.219	420.873	1099.95	375.304	389.477	1154.64	309.206
326	3.25	547.875	1260.78	264.703	592.789	1247.57	193.067	598.719	1251.36	327.197	714.667	1119.43	127.748	713.482	1125.63	385.964	615.173	1065.2	258.928	615.938	844.577	-18.7336	369.129	860.437	35.4096	383.106	860.301	103.838	303.428	866.255	76.5752	215.746	849.474	93.1612	590.911	868.037	533.139	437.608	1029.79	399.224	487.702	1076.98	422.015	427.307	1104.73	371.97	399.757	1160.6	305.18
327	3.26	547.794	1260.84	265.09	592.711	1247.71	193.383	598.337	1251.41	327.619	714.678	1119.4	127.761	713.74	1125.71	385.818	613.378	1065.33	258.26	615.977	844.531	-18.6636	369.074	860.45	35.4738	383.108	860.289	103.849	303.446	866.24	76.5907	215.753	849.487	93.1614	588.839	869.375	532.954	441.453	1033.81	396.187	492.317	1080.09	420.837	432.988	1109.26	368.942	409.631	1166.02	301.63
328	3.27	547.677	1260.92	265.452	592.612	1247.87	193.698	597.964	1251.49	328.059	714.678	1119.4	127.798	713.926	1125.75	385.677	612.984	1065.34	258.166	615.999	844.499	-18.6231	369.087	860.448	35.4996	383.051	860.293	103.876	303.451	866.234	76.6266	215.776	849.462	93.1877	586.76	870.623	532.796	445.172	1037.55	393.203	496.025	1082.4	419.656	438.246	1113.36	366.129	419.172	1170.79	298.33
329	3.28	547.613	1260.97	265.742	592.534	1247.98	193.962	597.904	1251.46	328.385	714.639	1119.39	127.828	714.054	1125.78	385.528	613.018	1065.31	258.211	616.021	844.441	-18.6106	369.09	860.453	35.4975	382.988	860.285	103.897	303.433	866.227	76.6522	215.762	849.437	93.2341	584.814	871.749	532.556	449.069	1040.82	390.203	499.586	1084.82	418.574	443.772	1117.12	363.321	428.397	1174.94	295.268
330	3.29	547.601	1261.03	266.025	592.503	1248.1	194.218	598.068	1251.4	328.636	714.671	1119.37	127.841	714.188	1125.84	385.37	613.01	1065.28	258.229	616.034	844.438	-18.6133	369.095	860.46	35.5373	383.014	860.25	103.912	303.43	866.224	76.6613	215.722	849.417	93.2922	582.917	872.771	532.269	452.984	1043.72	387.42	502.658	1087.06	417.467	449.168	1120.51	360.607	437.421	1178.54	292.421
331	3.3	547.652	1261.1	266.281	592.573	1248.19	194.455	598.212	1251.34	328.85	714.671	1119.37	127.857	714.341	1125.9	385.207	613.029	1065.26	258.251	616.026	844.456	-18.5829	369.097	860.43	35.5565	383.077	860.234	103.929	303.463	866.226	76.6844	215.719	849.386	93.3346	581.114	873.666	531.95	456.768	1046.31	384.886	505.665	1088.91	416.446	454.706	1123.35	358.188	445.982	1181.64	289.746
332	3.31	547.683	1261.19	266.472	592.619	1248.33	194.655	598.337	1251.31	329.013	714.64	1119.4	127.852	714.509	1125.93	385.036	613.156	1065.23	258.283	616.011	844.477	-18.5965	369.143	860.426	35.5197	383.09	860.252	103.893	303.464	866.219	76.6743	215.727	849.371	93.3428	579.615	874.483	531.553	460.317	1048.61	382.349	508.822	1090.49	415.358	459.789	1125.84	355.841	454.149	1184.1	287.29
333	3.32	547.737	1261.28	266.657	592.61	1248.48	194.85	598.356	1251.31	329.188	714.618	1119.42	127.82	714.653	1125.95	384.863	613.239	1065.2	258.309	615.987	844.52	-18.6372	369.129	860.431	35.4918	383.05	860.262	103.862	303.438	866.211	76.6528	215.709	849.396	93.3496	578.36	875.269	531.06	463.657	1050.55	379.879	511.82	1091.83	414.399	464.321	1128.19	353.695	461.753	1186.18	284.983
334	3.33	547.899	1261.37	266.882	592.682	1248.61	195.016	598.597	1251.26	329.329	714.654	1119.43	127.782	714.781	1125.98	384.725	613.268	1065.21	258.319	615.962	844.551	-18.6781	369.089	860.431	35.4941	383.035	860.27	103.847	303.438	866.216	76.6454	215.705	849.413	93.3423	577.217	875.894	530.546	466.943	1052.22	377.609	514.531	1092.83	413.463	468.73	1130.09	351.863	469.2	1187.86	282.747
335	3.34	548.092	1261.45	267.104	592.787	1248.74	195.165	599.059	1251.15	329.453	714.672	1119.43	127.779	714.873	1125.97	384.618	613.249	1065.21	258.287	615.958	844.569	-18.6986	369.083	860.419	35.4926	383.044	860.26	103.843	303.424	866.228	76.6315	215.699	849.401	93.346	576.297	876.314	529.991	470.14	1053.6	375.416	516.999	1093.78	412.742	473.329	1131.42	350.03	476.579	1189.02	280.681
336	3.35	548.246	1261.53	267.27	592.912	1248.87	195.294	599.341	1251.08	329.6	714.652	1119.44	127.731	714.985	1125.97	384.515	613.279	1065.22	258.252	615.972	844.596	-18.7305	369.033	860.415	35.4817	383.035	860.244	103.821	303.404	866.236	76.6286	215.674	849.424	93.3388	575.441	876.608	529.25	473.303	1054.75	373.428	519.314	1094.53	412.005	478.208	1132.3	348.293	482.174	1190.46	278.857
337	3.36	548.407	1261.6	267.415	593.035	1248.98	195.418	599.552	1251.02	329.725	714.669	1119.44	127.685	715.112	1125.96	384.452	613.429	1065.19	258.264	615.965	844.65	-18.7741	369.034	860.415	35.4674	383.019	860.244	103.817	303.42	866.226	76.646	215.706	849.435	93.3203	574.744	876.752	528.374	476.405	1055.78	371.691	521.431	1095.16	411.385	482.473	1133.26	346.799	486.036	1192.27	277.12
338	3.37	548.612	1261.66	267.584	593.187	1249.08	195.543	599.85	1250.95	329.841	714.759	1119.47	127.663	715.204	1125.94	384.398	613.572	1065.17	258.297	615.957	844.686	-18.7921	369.05	860.424	35.5006	383.066	860.247	103.828	303.447	866.235	76.6529	215.702	849.464	93.3537	574.305	876.734	527.513	479.066	1056.65	370.192	523.615	1095.83	410.939	486.138	1134.27	345.679	491.135	1193.28	276.061
339	3.38	548.83	1261.72	267.739	593.335	1249.19	195.663	600.201	1250.89	329.949	714.852	1119.48	127.64	715.333	1125.92	384.355	613.683	1065.14	258.276	615.91	844.712	-18.8205	369.077	860.435	35.5297	383.126	860.249	103.834	303.476	866.237	76.6478	215.73	849.461	93.3683	573.942	876.603	526.601	481.613	1057.48	368.822	525.589	1096.26	410.527	489.335	1135.24	344.651	496.169	1194.11	275.401
340	3.39	548.995	1261.78	267.843	593.49	1249.28	195.755	600.393	1250.85	330.025	714.92	1119.5	127.602	715.467	1125.88	384.326	613.75	1065.13	258.232	615.887	844.727	-18.8499	369.068	860.447	35.508	383.129	860.248	103.826	303.483	866.232	76.6496	215.75	849.456	93.363	573.523	876.328	525.567	484.058	1058	367.57	527.087	1096.45	410.246	492.354	1136.01	343.747	500.602	1195.06	274.907
341	3.4	549.186	1261.83	267.946	593.642	1249.34	195.841	600.666	1250.8	330.08	715.004	1119.5	127.527	715.628	1125.83	384.326	613.867	1065.12	258.187	615.905	844.719	-18.9144	369.108	860.43	35.5067	383.119	860.239	103.81	303.482	866.227	76.6586	215.702	849.447	93.3856	573.33	875.973	524.425	486.157	1058.63	366.419	528.528	1096.62	410.021	495.274	1136.64	343.138	505.569	1195.62	274.971
342	3.41	549.432	1261.84	268.068	593.812	1249.38	195.929	600.976	1250.72	330.166	715.085	1119.5	127.451	715.799	1125.76	384.346	613.998	1065.1	258.121	615.911	844.74	-18.9466	369.125	860.392	35.5319	383.134	860.194	103.83	303.513	866.21	76.6783	215.682	849.424	93.433	573.194	875.561	523.264	488.478	1058.99	365.321	530.13	1096.77	409.766	497.936	1137.16	342.742	511.171	1195.65	275.498
343	3.42	549.648	1261.86	268.202	593.953	1249.42	196.045	601.212	1250.65	330.266	715.165	1119.49	127.396	716.03	1125.72	384.331	614.196	1065.05	258.089	615.903	844.784	-18.9655	369.143	860.373	35.5209	383.158	860.156	103.835	303.507	866.197	76.6807	215.724	849.382	93.4443	573.093	875.047	522.165	490.251	1059.2	364.386	531.67	1096.81	409.439	500.417	1137.47	342.402	514.898	1196.26	275.832
344	3.43	549.847	1261.91	268.339	594.074	1249.47	196.164	601.401	1250.61	330.327	715.229	1119.48	127.329	716.25	1125.66	384.316	614.402	1065.02	258.084	615.866	844.798	-18.9666	369.104	860.353	35.5272	383.11	860.149	103.835	303.493	866.19	76.6781	215.695	849.37	93.4395	572.969	874.49	521.178	492.102	1059.34	363.339	532.811	1096.72	409.095	502.555	1137.75	342.004	517.785	1196.88	276.191
345	3.44	550.028	1261.98	268.48	594.194	1249.54	196.273	601.613	1250.65	330.415	715.314	1119.47	127.273	716.514	1125.57	384.243	614.541	1065.05	258.063	615.844	844.802	-18.9418	369.117	860.337	35.546	383.095	860.142	103.863	303.507	866.182	76.6925	215.646	849.384	93.4764	572.969	873.998	520.234	493.724	1059.51	362.398	533.801	1096.6	408.822	504.259	1138.04	341.644	519.623	1197.25	276.505
346	3.45	550.203	1262.08	268.62	594.313	1249.62	196.384	601.794	1250.73	330.494	715.385	1119.49	127.226	716.772	1125.46	384.095	614.667	1065.07	258.023	615.841	844.823	-18.9277	369.183	860.347	35.5328	383.117	860.158	103.881	303.495	866.194	76.7115	215.652	849.411	93.4939	573.198	873.488	519.234	495.018	1059.69	361.664	534.661	1096.49	408.632	505.903	1138.15	341.233	520.715	1197.26	276.543
347	3.46	550.292	1262.21	268.751	594.478	1249.71	196.506	601.889	1250.85	330.553	715.466	1119.54	127.148	716.97	1125.36	384.031	614.787	1065.07	257.97	615.846	844.855	-18.938	369.14	860.387	35.556	383.103	860.194	103.874	303.505	866.217	76.6958	215.658	849.428	93.4874	573.436	872.997	518.285	496.526	1059.67	360.947	535.362	1096.4	408.446	507.282	1138.11	340.746	521.372	1197.13	276.397
348	3.47	550.375	1262.36	268.87	594.596	1249.83	196.619	601.974	1250.96	330.624	715.53	1119.54	127.086	717.141	1125.27	384.009	614.923	1065.08	257.946	615.876	844.895	-18.9486	369.101	860.444	35.5544	383.091	860.209	103.854	303.52	866.24	76.6786	215.623	849.471	93.474	573.616	872.583	517.534	497.777	1059.6	360.346	535.918	1096.31	408.279	508.331	1137.99	340.33	521.898	1196.9	276.134
349	3.48	550.523	1262.48	269.005	594.827	1249.94	196.7	602.169	1251.03	330.711	715.595	1119.56	127.068	717.342	1125.16	384.035	615.007	1065.06	257.932	615.891	844.96	-18.9667	369.104	860.448	35.5554	383.11	860.215	103.854	303.521	866.262	76.6773	215.634	849.488	93.4788	573.799	872.156	516.921	498.586	1059.51	359.936	536.517	1096.18	408.165	509.078	1137.85	340.043	522.434	1196.64	275.894
350	3.49	550.752	1262.56	269.135	595.059	1250.04	196.786	602.503	1251.02	330.789	715.714	1119.58	127.049	717.466	1125.07	384.06	615.126	1065.04	257.912	615.904	845.026	-19.0053	369.138	860.432	35.5709	383.126	860.211	103.848	303.543	866.264	76.6953	215.69	849.461	93.4931	574.035	871.745	516.432	499.259	1059.31	359.613	537.138	1095.98	408.058	509.78	1137.72	339.846	522.945	1196.44	275.737
351	3.5	550.959	1262.63	269.247	595.247	1250.1	196.864	602.773	1251	330.852	715.779	1119.56	127.018	717.587	1124.98	384.076	615.245	1065.01	257.865	615.891	845.058	-19.0636	369.128	860.418	35.5821	383.133	860.182	103.856	303.524	866.242	76.7015	215.668	849.443	93.5263	574.324	871.345	515.99	500.01	1059.02	359.317	537.721	1095.71	407.961	510.466	1137.53	339.712	523.406	1196.25	275.646
352	3.51	551.176	1262.69	269.324	595.455	1250.17	196.925	602.899	1251.01	330.933	715.807	1119.55	126.983	717.643	1124.88	384.082	615.39	1064.94	257.816	615.856	845.081	-19.1076	369.109	860.373	35.5843	383.136	860.131	103.831	303.517	866.213	76.698	215.588	849.399	93.549	574.536	870.958	515.609	500.736	1058.73	359.021	538.208	1095.44	407.927	511.038	1137.33	339.604	523.839	1196.04	275.607
353	3.52	551.445	1262.74	269.374	595.736	1250.24	196.934	603.148	1251.06	331.017	715.893	1119.57	126.999	717.729	1124.8	384.134	615.475	1064.9	257.811	615.823	845.122	-19.1478	369.134	860.323	35.5828	383.175	860.063	103.84	303.551	866.18	76.7216	215.59	849.357	93.5668	574.783	870.63	515.286	501.441	1058.46	358.763	538.497	1095.21	407.947	511.553	1137.13	339.54	524.256	1195.83	275.614
354	3.53	551.677	1262.84	269.407	595.933	1250.36	196.965	603.409	1251.16	331.081	715.987	1119.6	127.038	717.849	1124.76	384.164	615.623	1064.86	257.845	615.786	845.157	-19.1712	369.186	860.325	35.6076	383.24	860.028	103.84	303.589	866.162	76.7435	215.63	849.335	93.5985	575.081	870.344	514.969	502.086	1058.26	358.552	538.653	1095.05	408.005	511.964	1136.97	339.502	524.6	1195.72	275.693
355	3.54	551.866	1262.97	269.407	596.106	1250.48	196.943	603.586	1251.26	331.117	716.042	1119.63	127.058	717.991	1124.75	384.18	615.693	1064.86	257.881	615.793	845.226	-19.1629	369.166	860.335	35.6138	383.257	860.037	103.837	303.579	866.173	76.7203	215.601	849.344	93.6038	575.324	870.128	514.646	502.658	1058.13	358.339	538.737	1094.99	408.073	512.257	1136.9	339.463	524.763	1195.75	275.832
356	3.55	552.03	1263.14	269.384	596.256	1250.64	196.923	603.568	1251.43	331.148	716.042	1119.65	127.082	718.001	1124.71	384.181	615.63	1064.94	257.914	615.783	845.3	-19.1589	369.122	860.362	35.6165	383.207	860.073	103.835	303.564	866.201	76.6995	215.583	849.365	93.5879	575.465	869.996	514.406	503.104	1058.12	358.181	538.866	1094.95	408.166	512.59	1136.89	339.476	524.877	1195.89	276.071
357	3.56	552.171	1263.34	269.351	596.493	1250.8	196.931	603.725	1251.53	331.112	716.061	1119.68	127.09	718.023	1124.67	384.209	615.611	1065.06	257.922	615.753	845.385	-19.116	369.104	860.407	35.627	383.198	860.106	103.842	303.569	866.217	76.7084	215.581	849.404	93.5958	575.609	869.889	514.208	503.494	1058.2	358.112	539.069	1094.96	408.304	513.03	1136.92	339.576	525.153	1196.04	276.411
358	3.57	552.313	1263.49	269.33	596.69	1250.93	196.931	603.835	1251.59	331.12	716.097	1119.71	127.091	718.067	1124.63	384.252	615.604	1065.15	257.916	615.732	845.445	-19.0693	369.136	860.417	35.6276	383.164	860.13	103.863	303.567	866.232	76.7131	215.574	849.471	93.6166	575.725	869.792	514.024	503.787	1058.34	358.103	539.309	1094.97	408.441	513.552	1136.97	339.725	525.468	1196.19	276.796
359	3.58	552.444	1263.57	269.297	596.827	1251.01	196.913	603.934	1251.64	331.123	716.096	1119.7	127.102	718.076	1124.58	384.295	615.577	1065.23	257.907	615.7	845.472	-19.0178	369.118	860.422	35.6179	383.097	860.144	103.864	303.548	866.225	76.7014	215.548	849.507	93.6099	575.678	869.685	513.862	503.973	1058.49	358.122	539.542	1094.98	408.541	514.083	1137.03	339.859	525.707	1196.34	277.131
360	3.59	552.546	1263.62	269.295	596.955	1251.08	196.903	603.819	1251.73	331.177	716.083	1119.69	127.138	718.066	1124.53	384.355	615.677	1065.18	257.992	615.672	845.47	-18.9868	369.105	860.406	35.6101	383.042	860.137	103.861	303.535	866.212	76.6967	215.517	849.529	93.5637	575.544	869.56	513.734	504.138	1058.65	358.146	539.826	1095.03	408.648	514.568	1137.11	340.005	525.986	1196.44	277.415
361	3.6	552.668	1263.64	269.311	597.056	1251.1	196.914	603.89	1251.75	331.239	716.125	1119.7	127.21	718.073	1124.49	384.431	615.922	1065.04	258.082	615.713	845.469	-18.9998	369.129	860.363	35.6077	383.051	860.111	103.872	303.545	866.201	76.7	215.512	849.531	93.5126	575.469	869.504	513.651	504.358	1058.75	358.166	540.114	1095.11	408.753	515.103	1137.14	340.121	526.272	1196.49	277.619
362	3.61	552.804	1263.64	269.321	597.152	1251.1	196.942	604.03	1251.74	331.262	716.188	1119.71	127.253	718.09	1124.46	384.496	616.137	1064.87	258.151	615.714	845.424	-18.9938	369.163	860.314	35.6033	383.157	860.075	103.844	303.571	866.193	76.7103	215.501	849.497	93.5081	575.384	869.446	513.586	504.559	1058.8	358.172	540.389	1095.16	408.844	515.568	1137.14	340.159	526.518	1196.48	277.735
363	3.62	552.883	1263.64	269.329	597.196	1251.11	196.954	604.058	1251.76	331.282	716.2	1119.71	127.29	718.108	1124.43	384.534	616.158	1064.8	258.184	615.738	845.385	-18.97	369.168	860.315	35.592	383.218	860.069	103.8	303.573	866.207	76.6891	215.478	849.491	93.4932	575.307	869.409	513.54	504.651	1058.85	358.178	540.543	1095.18	408.862	515.813	1137.16	340.14	526.669	1196.46	277.769
364	3.63	552.902	1263.66	269.388	597.229	1251.13	196.976	604.047	1251.8	331.352	716.212	1119.7	127.32	718.151	1124.42	384.599	616.085	1064.79	258.202	615.778	845.37	-18.9034	369.152	860.316	35.6011	383.239	860.067	103.796	303.572	866.225	76.6714	215.447	849.48	93.4836	575.247	869.389	513.526	504.599	1058.92	358.218	540.6	1095.18	408.857	515.904	1137.19	340.115	526.735	1196.43	277.758
365	3.64	552.927	1263.69	269.487	597.205	1251.17	197.08	604.057	1251.81	331.427	716.275	1119.7	127.37	718.191	1124.43	384.659	616.099	1064.82	258.267	615.757	845.353	-18.7611	369.154	860.345	35.6351	383.182	860.072	103.855	303.543	866.239	76.6825	215.459	849.502	93.5024	575.227	869.405	513.573	504.477	1058.99	358.287	540.64	1095.17	408.858	515.903	1137.23	340.133	526.757	1196.4	277.762
366	3.65	552.865	1263.71	269.619	597.094	1251.22	197.244	604.08	1251.79	331.553	716.309	1119.7	127.423	718.176	1124.41	384.701	616.024	1064.94	258.33	615.844	845.386	-18.6432	369.156	860.378	35.6786	383.076	860.1	103.95	303.549	866.233	76.7063	215.423	849.556	93.5417	575.218	869.433	513.623	504.256	1059.02	358.408	540.648	1095.12	408.821	515.764	1137.26	340.192	526.673	1196.38	277.783
367	3.66	552.757	1263.71	269.758	597.021	1251.23	197.357	603.944	1251.78	331.731	716.296	1119.68	127.459	718.17	1124.36	384.769	615.896	1065.11	258.362	615.975	845.421	-18.5443	369.141	860.417	35.7298	382.977	860.127	104.013	303.547	866.216	76.7198	215.368	849.569	93.5829	575.173	869.44	513.687	503.934	1059	358.539	540.54	1095.05	408.769	515.51	1137.24	340.267	526.471	1196.35	277.807
368	3.67	552.71	1263.64	269.885	596.992	1251.19	197.451	603.915	1251.67	331.864	716.313	1119.66	127.487	718.163	1124.32	384.834	615.791	1065.2	258.349	616.015	845.424	-18.4791	369.169	860.435	35.7481	382.936	860.145	104.041	303.525	866.209	76.7202	215.364	849.566	93.5969	575.2	869.407	513.801	503.546	1058.87	358.693	540.357	1094.92	408.727	515.23	1137.12	340.317	526.273	1196.28	277.847
369	3.68	552.771	1263.5	269.978	596.967	1251.13	197.549	603.965	1251.57	331.997	716.379	1119.65	127.527	718.157	1124.3	384.897	615.911	1065.1	258.365	616.047	845.382	-18.4109	369.201	860.394	35.7492	382.973	860.103	104.04	303.527	866.199	76.7244	215.428	849.513	93.61	575.3	869.346	513.961	503.085	1058.67	358.905	540.169	1094.74	408.708	514.872	1136.94	340.389	526.117	1196.15	277.89
370	3.69	552.737	1263.35	270.047	596.92	1251.03	197.622	603.847	1251.54	332.124	716.448	1119.65	127.552	718.129	1124.29	384.935	616.115	1064.93	258.395	616.074	845.303	-18.359	369.265	860.343	35.7115	383.069	860.052	103.998	303.549	866.194	76.7061	215.454	849.439	93.6104	575.492	869.288	514.106	502.391	1058.5	359.21	539.808	1094.52	408.693	514.334	1136.74	340.512	525.878	1196	277.994
371	3.7	552.592	1263.22	270.094	596.898	1250.93	197.63	603.63	1251.54	332.219	716.495	1119.64	127.57	718.144	1124.28	384.966	616.274	1064.75	258.415	616.092	845.227	-18.3458	369.274	860.332	35.667	383.148	860.033	103.926	303.544	866.201	76.6777	215.445	849.378	93.5762	575.694	869.206	514.217	501.465	1058.36	359.627	539.38	1094.26	408.728	513.504	1136.61	340.712	525.338	1195.83	278.2
372	3.71	552.493	1263.08	270.102	596.845	1250.83	197.637	603.411	1251.51	332.287	716.579	1119.64	127.581	718.1	1124.26	384.978	616.39	1064.63	258.397	616.117	845.182	-18.3126	369.281	860.337	35.6354	383.211	860.034	103.86	303.559	866.204	76.647	215.434	849.352	93.5338	575.977	869.093	514.35	500.552	1058.09	360.14	538.926	1093.92	408.834	512.393	1136.49	341.062	524.327	1195.67	278.546
373	3.72	552.377	1262.96	270.123	596.793	1250.77	197.679	603.306	1251.44	332.329	716.669	1119.63	127.577	718.066	1124.29	385.013	616.414	1064.6	258.336	616.144	845.176	-18.2597	369.314	860.313	35.618	383.226	860.056	103.816	303.564	866.224	76.6313	215.453	849.339	93.5231	576.398	868.939	514.541	499.547	1057.68	360.738	538.344	1093.48	409.017	511.23	1136.21	341.551	522.726	1195.51	278.978
374	3.73	552.167	1262.85	270.177	596.679	1250.73	197.77	603.048	1251.39	332.411	716.726	1119.6	127.584	718.028	1124.27	385.066	616.378	1064.64	258.283	616.188	845.193	-18.1989	369.287	860.336	35.636	383.157	860.067	103.849	303.567	866.222	76.6325	215.466	849.348	93.5496	576.859	868.676	514.715	498.08	1057.22	361.538	537.68	1092.96	409.22	509.878	1135.75	342.175	520.55	1195.27	279.531
375	3.74	551.899	1262.76	270.268	596.483	1250.71	197.918	602.824	1251.26	332.479	716.74	1119.59	127.604	717.924	1124.28	385.28	616.304	1064.8	258.264	616.269	845.261	-18.1428	369.26	860.366	35.7129	383.055	860.072	103.939	303.554	866.226	76.6587	215.442	849.4	93.5926	577.511	868.316	514.904	496.43	1056.72	362.58	537.19	1092.49	409.454	507.912	1135.3	343.018	517.561	1194.92	280.305
376	3.75	551.726	1262.65	270.355	596.36	1250.69	198.003	602.732	1251.11	332.514	716.808	1119.58	127.616	717.762	1124.34	385.732	616.154	1064.97	258.216	616.311	845.298	-18.073	369.271	860.385	35.7538	382.976	860.064	104.022	303.546	866.218	76.7026	215.428	849.438	93.6542	578.456	867.836	515.119	494.655	1056.09	363.949	536.726	1091.95	409.719	505.708	1134.73	343.959	514.028	1194.36	281.128
377	3.76	551.698	1262.5	270.372	596.324	1250.6	198.026	602.698	1250.95	332.506	716.894	1119.57	127.626	717.683	1124.35	385.88	616.219	1065.01	258.164	616.355	845.318	-18.0444	369.259	860.391	35.7585	382.981	860.043	104.065	303.549	866.193	76.7191	215.423	849.431	93.6959	579.552	867.243	515.405	492.375	1055.18	365.552	535.995	1091.14	409.968	503.115	1133.84	345.11	509.864	1193.53	281.97
378	3.77	551.725	1262.32	270.326	596.336	1250.49	197.981	602.574	1250.85	332.487	716.971	1119.58	127.613	717.576	1124.31	385.875	616.42	1064.91	258.121	616.398	845.287	-18.0185	369.24	860.368	35.7269	382.998	860.039	104.05	303.56	866.181	76.7097	215.422	849.383	93.6878	580.62	866.638	515.734	489.93	1054.17	367.293	534.996	1090.08	410.149	500.34	1132.68	346.256	505.16	1192.38	282.804
379	3.78	551.695	1262.17	270.222	596.302	1250.42	197.918	602.369	1250.82	332.443	717.063	1119.59	127.59	717.445	1124.24	385.753	616.501	1064.79	258.036	616.425	845.242	-17.9811	369.244	860.336	35.6964	383.025	860.058	103.982	303.519	866.204	76.6792	215.42	849.358	93.6583	581.969	865.915	516.032	487.341	1052.84	369.24	534.008	1088.91	410.174	496.892	1131.33	347.456	499.627	1191.03	283.704
380	3.79	551.576	1262.09	270.098	596.27	1250.36	197.844	602.199	1250.82	332.357	717.147	1119.61	127.579	717.403	1124.26	385.62	616.538	1064.7	257.933	616.398	845.208	-17.9563	369.253	860.341	35.7036	383.049	860.072	103.924	303.506	866.229	76.6533	215.396	849.347	93.6484	583.515	865.126	516.388	484.261	1051.54	371.382	532.731	1087.55	410.067	492.805	1129.99	348.906	493.501	1189.28	284.666
381	3.8	551.463	1262.05	269.949	596.251	1250.33	197.72	602.008	1250.87	332.288	717.196	1119.62	127.571	717.435	1124.31	385.503	616.562	1064.69	257.847	616.395	845.209	-17.9237	369.289	860.357	35.662	383.107	860.08	103.888	303.529	866.251	76.6335	215.408	849.344	93.643	585.268	864.38	516.785	480.739	1049.98	373.701	531.34	1085.95	409.912	488.524	1128.16	350.384	486.661	1187	285.698
382	3.81	551.383	1262.05	269.815	596.242	1250.31	197.609	601.898	1250.88	332.167	717.253	1119.61	127.576	717.419	1124.32	385.407	616.477	1064.75	257.756	616.44	845.215	-17.8848	369.258	860.377	35.6452	383.083	860.092	103.892	303.522	866.27	76.6239	215.42	849.375	93.6615	587.35	863.536	517.139	477.102	1047.99	376.247	529.735	1084.03	409.561	484.628	1125.66	351.824	478.93	1184.3	286.986
383	3.82	551.379	1262.04	269.681	596.266	1250.28	197.499	601.983	1250.83	331.992	717.269	1119.6	127.561	717.393	1124.29	385.347	616.433	1064.77	257.741	616.51	845.228	-17.8472	369.255	860.378	35.6783	383.038	860.101	103.945	303.498	866.27	76.6378	215.411	849.4	93.6785	589.393	862.662	517.442	473.387	1045.71	379.088	527.771	1081.76	408.944	480.089	1123.14	353.505	470.721	1181.27	287.99
384	3.83	551.392	1262.03	269.545	596.349	1250.27	197.36	602.145	1250.77	331.771	717.259	1119.58	127.547	717.421	1124.28	385.389	616.33	1064.8	257.741	616.536	845.231	-17.8263	369.278	860.379	35.7015	383.019	860.097	103.999	303.509	866.254	76.6535	215.431	849.402	93.7268	591.714	861.754	517.766	469.304	1043.24	382.172	525.569	1079.23	408.264	474.678	1120.54	355.282	462.465	1177.41	289.119
385	3.84	551.418	1262	269.349	596.408	1250.23	197.221	602.524	1250.67	331.478	717.257	1119.55	127.503	717.463	1124.28	385.425	616.179	1064.79	257.736	616.525	845.178	-17.8112	369.276	860.361	35.7272	383.005	860.087	104.007	303.525	866.23	76.674	215.426	849.382	93.7555	593.989	860.852	518.116	464.83	1040.43	385.351	523.031	1076.6	407.649	469.337	1117.28	356.757	453.757	1173.11	290.134
386	3.85	551.484	1261.99	269.115	596.473	1250.15	197.041	602.757	1250.62	331.188	717.236	1119.53	127.441	717.503	1124.27	385.434	616.152	1064.71	257.737	616.518	845.127	-17.8069	369.281	860.327	35.7222	382.99	860.084	103.985	303.522	866.214	76.6658	215.391	849.341	93.7485	596.201	859.941	518.432	460.42	1037.35	388.626	520.04	1073.64	406.878	463.602	1113.49	358.135	444.562	1168.29	291.298
387	3.86	551.509	1261.98	268.892	596.546	1250.09	196.84	602.777	1250.7	330.958	717.209	1119.52	127.395	717.625	1124.27	385.448	616.862	1064.7	258.004	616.507	845.072	-17.8336	369.302	860.343	35.709	383.044	860.062	103.967	303.523	866.208	76.6569	215.404	849.271	93.7421	598.654	859.014	518.819	456.212	1033.84	392.04	516.964	1070.39	405.977	457.638	1109.34	359.674	434.88	1162.84	292.766
388	3.87	551.56	1261.99	268.629	596.63	1250.04	196.622	602.718	1250.79	330.727	717.199	1119.5	127.366	717.776	1124.29	385.452	618.399	1064.54	258.632	616.477	844.994	-17.8428	369.288	860.316	35.6984	383.067	860.04	103.97	303.521	866.204	76.6647	215.409	849.236	93.7555	601.072	858.133	519.212	451.619	1029.95	395.551	513.615	1066.75	404.938	451.439	1104.81	361.451	424.62	1156.93	294.421
389	3.88	551.657	1261.98	268.331	596.76	1249.99	196.319	602.652	1250.89	330.496	717.189	1119.5	127.3	717.879	1124.31	385.454	617.89	1064.05	258.482	616.469	844.911	-17.8545	369.305	860.275	35.6844	383.063	860.026	103.958	303.529	866.197	76.6541	215.397	849.238	93.7501	603.606	857.224	519.376	447.181	1025.7	398.989	509.719	1062.84	403.878	444.737	1099.94	363.379	414.007	1150.42	296.47
390	3.89	551.756	1261.98	268.05	596.933	1249.9	195.973	602.701	1250.94	330.31	717.165	1119.48	127.224	718.004	1124.3	385.472	616.807	1064.12	257.978	616.457	844.847	-17.8673	369.316	860.278	35.697	383.063	860.024	103.937	303.527	866.184	76.6555	215.399	849.234	93.745	606.223	856.434	519.566	442.82	1021.08	402.557	505.562	1058.33	402.779	437.858	1094.65	365.324	403.145	1143.29	299.041
391	3.9	551.808	1261.99	267.794	597.126	1249.8	195.677	602.81	1250.97	330.104	717.156	1119.44	127.175	718.157	1124.29	385.51	617.527	1064.06	258.289	616.441	844.812	-17.862	369.279	860.286	35.7274	383.032	860.037	103.971	303.524	866.191	76.6648	215.401	849.213	93.768	608.804	855.654	519.867	438.37	1016.26	406.08	501.312	1053.65	401.693	430.99	1088.92	367.465	392.071	1135.69	301.672
392	3.91	551.889	1262.02	267.569	597.255	1249.72	195.425	602.884	1251.04	329.951	717.137	1119.4	127.143	718.278	1124.28	385.554	619.468	1063.61	259.207	616.475	844.798	-17.8702	369.247	860.298	35.7602	382.992	860.047	104.014	303.511	866.189	76.6946	215.422	849.213	93.8057	611.117	854.871	520.122	434.197	1011.14	409.571	495.969	1048.59	400.362	424.261	1082.83	369.684	380.749	1127.53	304.909
393	3.92	551.97	1262.06	267.325	597.351	1249.65	195.2	602.846	1251.14	329.754	717.118	1119.36	127.081	718.396	1124.27	385.576	618.566	1063.74	258.848	616.503	844.816	-17.875	369.234	860.31	35.7781	382.961	860.046	104.049	303.491	866.198	76.6997	215.406	849.237	93.8565	613.256	854.195	520.276	430.147	1005.77	413.15	490.307	1043.09	398.977	417.379	1076.35	372.012	369.248	1119.05	308.562
394	3.93	552.047	1262.11	267.027	597.415	1249.6	194.96	602.692	1251.3	329.527	717.121	1119.34	127.005	718.486	1124.28	385.578	618.308	1063.81	258.728	616.519	844.842	-17.8846	369.235	860.324	35.7855	382.956	860.056	104.057	303.475	866.224	76.7104	215.393	849.254	93.8796	615.685	853.622	520.402	426.19	1000.22	416.683	486.144	1037.86	398.233	410.717	1069.84	374.366	358.128	1110.21	312.589
395	3.94	552.097	1262.14	266.735	597.507	1249.55	194.706	602.504	1251.47	329.332	717.139	1119.33	126.945	718.524	1124.31	385.588	618.262	1063.82	258.655	616.497	844.824	-17.9017	369.206	860.354	35.7919	382.937	860.083	104.035	303.492	866.236	76.7032	215.373	849.269	93.8825	618.049	853.111	520.564	422.221	994.626	420.417	480.513	1031.86	397.522	404.507	1063.46	376.849	347.774	1100.55	316.674
396	3.95	552.24	1262.14	266.409	597.535	1249.52	194.459	602.386	1251.65	329.107	717.152	1119.33	126.876	718.536	1124.34	385.609	618.288	1063.81	258.579	616.473	844.738	-17.9571	369.247	860.332	35.7408	382.956	860.101	103.997	303.483	866.251	76.7019	215.358	849.246	93.8739	620.006	852.69	520.628	417.572	989.322	424.468	475.08	1026.19	396.874	397.931	1056.26	379.18	337.383	1090.31	321.185
397	3.96	552.369	1262.12	266.058	597.542	1249.48	194.193	602.392	1251.79	328.849	717.182	1119.34	126.779	718.498	1124.35	385.63	618.368	1063.76	258.462	616.445	844.647	-18.0193	369.235	860.307	35.6829	383.037	860.091	103.905	303.467	866.255	76.6701	215.36	849.194	93.8545	621.667	852.117	520.636	414.248	983.682	428.128	470.887	1020.96	397.215	390.994	1048.34	381.528	327.044	1079.73	326.01
398	3.97	552.443	1262.14	265.727	597.6	1249.42	193.962	602.616	1251.88	328.518	717.238	1119.34	126.742	718.388	1124.36	385.643	618.439	1063.7	258.349	616.412	844.612	-18.0566	369.278	860.271	35.6303	383.088	860.071	103.839	303.483	866.237	76.6343	215.4	849.142	93.8333	623.086	851.451	520.67	412.108	977.819	431.504	464.858	1014.8	397.218	384.614	1040.57	384.078	317.823	1069.07	330.774
399	3.98	552.518	1262.21	265.412	597.649	1249.4	193.733	603.059	1251.91	328.117	717.283	1119.31	126.73	718.24	1124.39	385.666	618.487	1063.67	258.28	616.406	844.601	-18.0612	369.319	860.237	35.5873	383.1	860.055	103.827	303.489	866.22	76.6309	215.425	849.128	93.838	624.457	850.877	520.741	409.522	971.96	434.985	458.987	1008.53	397.351	378.53	1032.85	386.768	309.781	1058.56	335.485
400	3.99	552.554	1262.33	265.105	597.71	1249.38	193.543	603.346	1251.93	327.774	717.299	1119.29	126.715	718.066	1124.4	385.673	618.476	1063.65	258.245	616.394	844.588	-18.0478	369.331	860.232	35.6129	383.085	860.05	103.871	303.477	866.205	76.6575	215.45	849.157	93.8832	625.844	850.374	520.743	406.973	966.028	438.474	454.884	1002.84	398.281	373.03	1025.2	389.547	302.333	1048.19	340.149
401	4	552.549	1262.49	264.761	597.747	1249.41	193.372	603.507	1251.99	327.467	717.294	1119.26	126.67	717.904	1124.41	385.682	618.396	1063.67	258.198	616.455	844.613	-18.0204	369.29	860.243	35.6552	382.99	860.068	103.93	303.47	866.2	76.6736	215.432	849.203	93.9217	627.183	849.886	520.732	404.031	960.416	442.19	450.448	996.839	399.259	367.714	1017.52	392.437	294.463	1037.86	345.046
402	4.01	552.609	1262.63	264.399	597.824	1249.44	193.141	603.443	1252.15	327.158	717.344	1119.24	126.622	717.751	1124.44	385.685	618.289	1063.7	258.128	616.503	844.598	-17.9992	369.261	860.27	35.6675	382.933	860.073	103.954	303.474	866.2	76.6646	215.407	849.248	93.936	628.522	849.367	520.718	400.629	955.239	446.163	445.376	990.14	400.092	362.402	1009.79	395.433	287.247	1028.06	350.05
403	4.02	552.705	1262.74	264.044	597.956	1249.48	192.811	603.231	1252.4	326.933	717.618	1119.22	126.683	717.601	1124.45	385.71	618.177	1063.76	258.055	616.551	844.56	-17.9571	369.284	860.285	35.6567	382.935	860.101	103.941	303.485	866.21	76.6511	215.432	849.255	93.9388	629.715	848.937	520.678	398.194	949.624	449.591	441.307	983.604	401.453	357.66	1002.05	398.485	280.969	1018.41	355.043
404	4.03	552.796	1262.83	263.703	598.223	1249.48	192.407	603.001	1252.66	326.708	718.18	1119.19	126.801	717.44	1124.45	385.754	618.103	1063.78	257.945	616.613	844.514	-17.9272	369.297	860.301	35.6191	382.992	860.121	103.878	303.513	866.208	76.626	215.437	849.239	93.9255	630.67	848.679	520.648	396.001	943.743	452.79	436.662	977.093	402.668	354.122	994.358	402.094	275.01	1008.85	360.074
405	4.04	552.872	1262.9	263.398	598.521	1249.44	192.009	602.945	1252.88	326.441	718.3	1119.18	126.81	717.194	1124.42	385.837	618.005	1063.79	257.86	616.609	844.439	-17.9232	369.259	860.307	35.6117	383.038	860.12	103.83	303.504	866.218	76.6042	215.451	849.207	93.8973	631.551	848.425	520.656	394.326	937.834	455.799	432.25	970.937	403.938	351.665	986.723	406.115	269.458	999.266	365.174
406	4.05	553.004	1262.92	263.098	598.832	1249.4	191.621	603.055	1253.01	326.143	717.561	1119.1	126.524	716.909	1124.4	385.957	617.895	1063.79	257.801	616.581	844.376	-17.9292	369.254	860.274	35.5975	383.057	860.102	103.822	303.512	866.211	76.6003	215.479	849.172	93.8781	632.402	848.193	520.693	392.661	932.027	458.532	428.791	964.916	405.314	347.354	979.395	409.308	264.167	989.547	370.428
407	4.06	553.172	1262.93	262.798	599.036	1249.36	191.322	602.937	1253.19	325.87	716.394	1119.01	126.091	716.62	1124.36	386.117	617.849	1063.74	257.763	616.614	844.361	-17.8865	369.293	860.233	35.572	383.102	860.064	103.817	303.532	866.192	76.6053	215.527	849.12	93.897	633.137	847.992	520.802	391.004	926.411	461.187	425.899	958.722	406.594	342.236	971.893	411.861	259.253	979.638	375.632
408	4.07	553.265	1262.99	262.513	599.178	1249.36	191.055	602.962	1253.32	325.632	717.189	1119.2	126.491	716.3	1124.3	386.249	617.789	1063.67	257.745	616.632	844.375	-17.8641	369.328	860.222	35.5624	383.117	860.034	103.814	303.509	866.188	76.6131	215.528	849.059	93.9336	633.707	847.808	520.964	389.51	920.926	463.788	422.561	952.991	408.201	338.459	964.55	414.94	254.836	969.831	380.604
409	4.08	553.318	1263.09	262.203	599.32	1249.36	190.817	602.992	1253.42	325.404	717.315	1119.23	126.621	715.975	1124.26	386.329	617.716	1063.61	257.73	616.639	844.401	-17.8486	369.276	860.231	35.6001	383.059	860.031	103.818	303.494	866.177	76.6123	215.505	849.035	93.9715	634.198	847.706	521.222	388.308	915.666	466.436	419.478	947.448	409.833	335.072	957.428	417.894	250.904	960.273	385.337
410	4.09	553.305	1263.23	261.871	599.361	1249.38	190.638	602.931	1253.54	325.218	717.293	1119.25	126.727	715.804	1124.24	386.387	617.685	1063.57	257.714	616.689	844.427	-17.7989	369.275	860.226	35.5847	383.023	860.054	103.842	303.495	866.173	76.6117	215.506	849.033	93.9831	634.609	847.647	521.517	387.091	910.772	469.094	416.617	941.915	411.2	332.253	950.421	420.674	247.353	950.984	389.765
411	4.1	553.25	1263.36	261.549	599.423	1249.37	190.478	602.759	1253.7	325.035	717.263	1119.28	126.784	715.656	1124.2	386.437	617.626	1063.58	257.689	616.722	844.437	-17.7723	369.301	860.247	35.5971	383.062	860.094	103.836	303.495	866.202	76.6191	215.499	849.056	94.0031	634.975	847.624	521.786	386.1	906.307	471.699	413.92	936.299	412.499	329.665	943.78	423.192	244.265	942.164	393.912
412	4.11	553.167	1263.48	261.261	599.464	1249.39	190.333	602.533	1253.85	324.891	717.241	1119.31	126.84	715.458	1124.17	386.499	617.529	1063.63	257.657	616.742	844.454	-17.7346	369.297	860.287	35.6244	383.026	860.119	103.867	303.489	866.218	76.6374	215.502	849.087	94.0342	635.335	847.592	522.013	385.292	902.204	474.307	411.332	930.714	413.616	327.432	937.361	425.44	241.651	933.817	397.881
413	4.12	553.081	1263.58	261.022	599.485	1249.39	190.218	602.28	1253.98	324.797	717.224	1119.34	126.875	715.26	1124.14	386.598	617.43	1063.64	257.643	616.752	844.509	-17.728	369.29	860.331	35.6484	383.002	860.148	103.909	303.5	866.236	76.6379	215.495	849.138	94.0524	635.71	847.506	522.226	384.805	898.454	476.739	409.171	925.256	414.596	325.653	931.048	427.643	239.404	925.944	401.875
414	4.13	553.034	1263.62	260.786	599.504	1249.37	190.104	602.178	1254.06	324.645	717.201	1119.34	126.929	715.059	1124.1	386.724	617.34	1063.62	257.629	616.77	844.518	-17.7013	369.288	860.361	35.6426	382.994	860.159	103.898	303.509	866.242	76.6316	215.492	849.146	94.0579	636.025	847.342	522.374	384.464	894.945	478.88	407.165	920.167	415.688	324.083	925.132	429.733	237.426	918.404	405.828
415	4.14	552.954	1263.61	260.588	599.524	1249.33	189.978	601.943	1254.11	324.502	717.146	1119.34	126.979	714.797	1124.05	386.847	617.244	1063.53	257.603	616.807	844.531	-17.659	369.309	860.346	35.6365	383.014	860.123	103.864	303.511	866.219	76.623	215.535	849.124	94.0587	636.302	847.126	522.444	384.255	891.698	480.924	405.627	915.46	416.596	322.636	919.676	431.889	235.81	911.252	409.685
416	4.15	552.842	1263.62	260.44	599.513	1249.28	189.912	601.782	1254.11	324.413	717.088	1119.36	127.03	714.473	1123.98	386.982	617.102	1063.45	257.586	616.77	844.506	-17.6609	369.34	860.296	35.6322	383.005	860.094	103.859	303.494	866.204	76.6248	215.532	849.076	94.0705	636.595	846.813	522.451	384.204	888.583	482.669	404.038	911.253	417.631	321.419	914.557	434.061	234.512	904.589	413.406
417	4.16	552.742	1263.61	260.329	599.435	1249.27	189.871	601.583	1254.15	324.357	716.993	1119.38	127.1	714.17	1123.92	387.1	616.965	1063.35	257.594	616.713	844.459	-17.6693	369.335	860.256	35.6182	383.025	860.035	103.86	303.504	866.165	76.6468	215.501	849.019	94.0764	637.003	846.423	522.406	384.285	885.475	484.234	402.878	907.558	418.49	320.547	909.787	436.139	233.167	898.563	416.879
418	4.17	552.627	1263.62	260.216	599.374	1249.26	189.803	601.252	1254.27	324.308	716.877	1119.41	127.147	713.924	1123.87	387.183	616.9	1063.25	257.572	616.684	844.425	-17.6758	369.34	860.213	35.6188	383.082	860.005	103.831	303.524	866.139	76.6481	215.506	848.973	94.0602	637.43	845.99	522.31	384.402	882.58	485.752	401.772	904.188	419.423	319.884	905.359	438.111	232.289	893.046	420.211
419	4.18	552.495	1263.66	260.123	599.317	1249.25	189.78	600.966	1254.34	324.285	716.783	1119.46	127.195	713.794	1123.83	387.262	616.808	1063.18	257.567	616.694	844.438	-17.6828	369.359	860.2	35.6014	383.117	860.017	103.792	303.545	866.134	76.6284	215.558	848.949	94.0364	637.858	845.619	522.185	384.435	879.899	487.055	400.976	900.976	420.439	319.429	901.178	439.986	232.583	887.863	423.438
420	4.19	552.343	1263.73	260.093	599.227	1249.26	189.781	600.685	1254.43	324.291	716.697	1119.5	127.228	713.715	1123.81	387.364	616.703	1063.18	257.62	616.701	844.471	-17.6384	369.35	860.245	35.6055	383.085	860.042	103.817	303.532	866.167	76.625	215.55	848.952	94.0529	638.3	845.338	522.053	384.634	877.204	488.171	400.577	897.903	421.285	319.259	897.363	441.666	232.487	883.31	425.956
421	4.2	552.189	1263.79	260.139	599.137	1249.3	189.827	600.473	1254.51	324.352	716.607	1119.55	127.29	713.648	1123.81	387.5	616.565	1063.23	257.711	616.705	844.51	-17.6294	369.323	860.305	35.6734	383.011	860.087	103.885	303.506	866.194	76.6471	215.515	849.032	94.0963	638.811	845.127	521.919	384.861	874.697	489.301	400.057	894.916	422.172	318.828	894.025	443.103	232.219	879.328	427.989
422	4.21	552.028	1263.8	260.198	599.015	1249.29	189.903	600.379	1254.46	324.408	716.545	1119.58	127.345	713.585	1123.78	387.596	616.416	1063.27	257.802	616.745	844.573	-17.5863	369.307	860.355	35.6985	382.945	860.101	103.954	303.491	866.209	76.6754	215.503	849.072	94.1403	639.288	844.974	521.76	384.981	872.377	490.336	399.425	891.996	423.034	318.486	890.823	444.233	231.896	875.836	429.544
423	4.22	551.893	1263.73	260.289	598.972	1249.25	189.974	600.461	1254.3	324.463	716.493	1119.62	127.392	713.536	1123.71	387.673	616.42	1063.22	257.883	616.759	844.656	-17.5784	369.317	860.37	35.7148	382.921	860.078	103.999	303.512	866.189	76.6864	215.497	849.062	94.1684	639.677	844.769	521.613	385.016	870.146	491.148	398.77	889.044	423.521	318.341	887.698	445.149	231.656	872.532	430.83
424	4.23	551.84	1263.57	260.451	598.943	1249.18	190.074	600.527	1254.1	324.592	716.428	1119.65	127.439	713.493	1123.63	387.769	616.475	1063.13	257.981	616.765	844.694	-17.5777	369.359	860.348	35.7511	382.969	860.051	104.023	303.535	866.16	76.7135	215.499	849.037	94.2077	640.023	844.598	521.498	384.989	868.178	491.878	398.434	886.082	423.846	318.059	884.872	445.931	231.485	869.504	432.014
425	4.24	551.778	1263.39	260.645	598.84	1249.11	190.225	600.588	1253.91	324.714	716.36	1119.67	127.517	713.472	1123.57	387.897	616.455	1063.06	258.081	616.718	844.719	-17.5743	369.28	860.336	35.8054	383.02	860.012	104.059	303.538	866.154	76.7512	215.511	848.979	94.2382	640.355	844.467	521.407	385.104	866.428	492.551	398.342	883.558	424.038	317.815	882.237	446.633	231.359	866.482	433.15
426	4.25	551.605	1263.23	260.827	598.641	1249.04	190.391	600.458	1253.8	324.853	716.357	1119.71	127.596	713.411	1123.5	388.034	616.411	1063	258.116	616.684	844.759	-17.5496	369.266	860.335	35.8001	383.005	860	104.082	303.512	866.148	76.7552	215.513	848.95	94.2441	640.554	844.337	521.341	385.187	864.855	493.033	397.996	881.439	424.182	317.74	879.715	447.179	231.303	863.659	434.252
427	4.26	551.486	1263.06	261.006	598.421	1248.98	190.564	600.275	1253.72	325.026	716.387	1119.75	127.673	713.389	1123.44	388.155	616.39	1062.96	258.126	616.682	844.773	-17.5285	369.295	860.346	35.7845	383.047	859.987	104.044	303.526	866.148	76.7456	215.54	848.918	94.2344	640.704	844.226	521.335	385.369	863.471	493.344	397.735	879.663	424.329	317.845	877.497	447.567	231.38	860.981	435.153
428	4.27	551.411	1262.94	261.229	598.259	1248.95	190.752	600.204	1253.58	325.237	716.441	1119.79	127.755	713.4	1123.41	388.246	616.432	1062.95	258.171	616.687	844.805	-17.5197	369.318	860.366	35.7781	383.076	859.996	104.016	303.546	866.17	76.7514	215.589	848.893	94.2331	640.879	844.136	521.396	385.674	862.24	493.548	397.69	877.995	424.406	318.034	875.4	447.896	231.622	858.469	435.876
429	4.28	551.28	1262.89	261.504	598.046	1248.98	190.987	600.006	1253.52	325.468	716.509	1119.83	127.842	713.449	1123.37	388.317	616.397	1062.98	258.245	616.718	844.836	-17.4888	369.347	860.392	35.8171	383.028	860.033	104.05	303.536	866.188	76.7565	215.573	848.928	94.2655	641.009	844.006	521.479	385.843	861.075	493.664	397.696	876.859	424.364	318.15	873.611	448.129	231.774	856.145	436.284
430	4.29	551.074	1262.87	261.774	597.823	1248.99	191.249	599.792	1253.44	325.703	716.513	1119.86	127.9	713.509	1123.34	388.382	616.326	1063.03	258.323	616.784	844.895	-17.4172	369.357	860.423	35.8295	382.952	860.051	104.065	303.551	866.2	76.7516	215.518	848.971	94.2947	641.05	843.856	521.566	385.967	859.936	493.727	397.732	875.853	424.333	318.139	871.966	448.218	232.014	854.195	436.423
431	4.3	550.923	1262.82	262.05	597.62	1248.99	191.52	599.594	1253.31	325.919	716.516	1119.85	127.946	713.59	1123.31	388.426	616.343	1063.02	258.419	616.814	844.936	-17.338	369.358	860.447	35.8362	382.965	860.037	104.082	303.546	866.205	76.7583	215.511	848.975	94.3096	641.091	843.712	521.692	386.13	858.97	493.746	397.714	874.656	424.283	318.29	870.476	447.939	232.258	852.645	435.968
432	4.31	550.894	1262.71	262.334	597.482	1248.97	191.814	599.753	1253.06	326.064	716.512	1119.82	127.975	713.679	1123.27	388.46	616.476	1062.96	258.527	616.817	844.9	-17.2707	369.351	860.414	35.8642	382.999	860.01	104.13	303.547	866.174	76.7703	215.563	848.931	94.3258	641.091	843.614	521.832	386.145	858.305	493.679	397.942	873.285	424.039	318.522	869.457	447.33	232.425	851.759	434.926
433	4.32	550.877	1262.57	262.6	597.362	1248.96	192.111	599.922	1252.78	326.242	716.531	1119.79	128.017	713.744	1123.24	388.484	616.602	1062.9	258.607	616.817	844.875	-17.227	369.367	860.349	35.8694	382.979	859.988	104.138	303.554	866.122	76.7822	215.588	848.881	94.3339	641.078	843.604	521.975	385.937	857.948	493.635	398.178	872.211	423.692	318.696	868.808	446.738	232.565	851.469	433.792
434	4.33	550.821	1262.41	262.821	597.301	1248.95	192.391	599.807	1252.65	326.475	716.561	1119.78	128.063	713.786	1123.23	388.489	616.637	1062.88	258.656	616.851	844.847	-17.2074	369.358	860.345	35.8849	383.017	859.951	104.14	303.539	866.103	76.7913	215.567	848.849	94.3458	641.002	843.673	522.154	385.521	857.78	493.665	398.316	871.404	423.378	318.805	868.338	446.312	232.722	851.398	432.9
435	4.34	550.761	1262.28	263.04	597.305	1248.94	192.641	599.788	1252.53	326.688	716.575	1119.77	128.086	713.902	1123.25	388.495	616.752	1062.88	258.707	616.886	844.854	-17.1737	369.378	860.355	35.8883	383.077	859.915	104.157	303.551	866.101	76.7942	215.586	848.818	94.3521	640.957	843.835	522.389	385.427	857.519	493.541	398.344	870.817	423.126	318.871	868.015	446.008	232.754	851.353	432.279
436	4.35	550.734	1262.19	263.269	597.323	1249.01	192.889	599.957	1252.33	326.846	716.631	1119.77	128.077	714.009	1123.28	388.479	616.878	1062.9	258.741	616.894	844.837	-17.1235	369.408	860.369	35.9035	383.107	859.913	104.147	303.564	866.113	76.7856	215.622	848.789	94.3365	640.939	844.041	522.663	385.442	857.238	493.377	398.393	870.46	422.976	318.925	867.851	445.851	232.712	851.272	432.032
437	4.36	550.717	1262.11	263.456	597.368	1249.05	193.104	599.978	1252.17	327.027	716.742	1119.77	128.077	714.125	1123.3	388.459	616.945	1062.95	258.738	616.914	844.816	-17.0813	369.408	860.358	35.8901	383.102	859.941	104.133	303.573	866.12	76.7659	215.632	848.804	94.32	640.87	844.25	522.913	385.488	857.018	493.266	398.41	870.285	422.877	318.971	867.809	445.811	232.647	851.243	432.101
438	4.37	550.685	1262.06	263.65	597.456	1249.08	193.293	599.705	1252.08	327.297	716.833	1119.76	128.088	714.214	1123.34	388.435	617.055	1062.98	258.733	616.918	844.796	-17.011	369.413	860.388	35.8666	383.067	859.966	104.123	303.573	866.127	76.7592	215.63	848.835	94.3039	640.742	844.407	523.104	385.537	856.884	493.233	398.371	870.133	422.796	318.99	867.794	445.819	232.563	851.288	432.291
439	4.38	550.653	1262.02	263.894	597.498	1249.13	193.481	599.358	1252.01	327.666	716.961	1119.76	128.078	714.321	1123.35	388.422	617.186	1063.03	258.763	616.962	844.793	-16.9504	369.412	860.435	35.8988	383.052	860.012	104.166	303.566	866.151	76.7695	215.615	848.871	94.3297	640.675	844.522	523.256	385.587	856.767	493.254	398.454	869.805	422.782	319.018	867.762	445.866	232.484	851.302	432.487
440	4.39	550.648	1261.95	264.142	597.566	1249.16	193.691	599.244	1251.84	327.973	717.087	1119.71	128.082	714.444	1123.37	388.4	617.372	1063.01	258.815	617.072	844.815	-16.8504	369.405	860.473	35.9275	383.043	860.031	104.215	303.562	866.156	76.7846	215.631	848.906	94.3531	640.671	844.655	523.428	385.648	856.591	493.305	398.548	869.416	422.786	319.084	867.668	445.929	232.415	851.203	432.596
441	4.4	550.65	1261.87	264.377	597.613	1249.2	193.878	599.11	1251.69	328.257	717.182	1119.65	128.084	714.54	1123.36	388.369	617.491	1063.02	258.82	617.084	844.774	-16.7745	369.414	860.457	35.9248	383.045	860.023	104.218	303.578	866.126	76.8063	215.635	848.906	94.3565	640.636	844.818	523.569	385.74	856.146	493.182	398.524	869.064	422.79	319.118	867.527	445.941	232.331	851.048	432.583
442	4.41	550.698	1261.77	264.568	597.68	1249.25	194.04	599.077	1251.55	328.455	717.262	1119.61	128.072	714.661	1123.34	388.341	617.649	1063.01	258.802	617.114	844.676	-16.7314	369.456	860.417	35.867	383.01	860.003	104.204	303.577	866.115	76.7922	215.628	848.87	94.342	640.547	844.997	523.734	385.905	855.39	492.858	398.482	868.771	422.794	319.131	867.385	445.921	232.258	850.92	432.479
443	4.42	550.802	1261.68	264.768	597.84	1249.29	194.196	599.113	1251.38	328.627	717.325	1119.56	128.046	714.79	1123.36	388.307	617.821	1063	258.778	617.145	844.575	-16.671	369.466	860.412	35.8418	383.026	860.008	104.182	303.566	866.12	76.7804	215.627	848.83	94.344	640.535	845.198	523.954	385.936	854.984	492.769	398.468	868.542	422.822	319.192	867.253	445.899	232.246	850.839	432.324
444	4.43	550.899	1261.61	264.951	597.974	1249.39	194.356	599.126	1251.3	328.828	717.453	1119.53	128.014	714.94	1123.36	388.276	617.927	1063.02	258.754	617.171	844.492	-16.6052	369.487	860.394	35.8418	383.092	860.005	104.159	303.584	866.115	76.7708	215.667	848.776	94.3384	640.706	845.462	524.224	385.961	854.715	492.775	398.411	868.373	422.861	319.241	867.162	445.872	232.262	850.762	432.22
445	4.44	550.971	1261.58	265.113	598.132	1249.52	194.508	599.183	1251.23	328.984	717.545	1119.49	127.983	715.039	1123.33	388.269	618.015	1063.06	258.673	617.193	844.396	-16.5593	369.528	860.387	35.8325	383.128	860	104.145	303.601	866.123	76.7626	215.685	848.765	94.3318	640.879	845.656	524.492	385.966	854.485	492.836	398.369	868.206	422.904	319.294	867.091	445.876	232.245	850.722	432.178
446	4.45	550.995	1261.61	265.271	598.259	1249.63	194.671	599.246	1251.14	329.118	717.621	1119.44	127.919	715.108	1123.27	388.263	618.078	1063.11	258.59	617.213	844.321	-16.5304	369.506	860.384	35.8437	383.078	860.031	104.14	303.587	866.136	76.7629	215.689	848.787	94.3201	641.025	845.782	524.745	385.964	854.236	492.94	398.348	868.036	422.957	319.345	867.042	445.941	232.231	850.688	432.175
447	4.46	551.07	1261.65	265.461	598.338	1249.77	194.842	599.535	1250.96	329.273	717.682	1119.4	127.841	715.153	1123.2	388.261	618.161	1063.15	258.547	617.282	844.279	-16.4641	369.51	860.409	35.8474	383.041	860.083	104.162	303.55	866.142	76.7746	215.682	848.839	94.3428	641.194	845.864	524.99	385.962	853.946	493.093	398.389	867.909	423.054	319.428	866.983	446.068	232.232	850.656	432.218
448	4.47	551.189	1261.71	265.705	598.473	1249.91	195.01	599.897	1250.73	329.434	717.754	1119.37	127.791	715.215	1123.08	388.293	618.279	1063.18	258.523	617.365	844.232	-16.39	369.502	860.442	35.8814	383.029	860.103	104.208	303.555	866.132	76.7959	215.714	848.89	94.4059	641.322	845.87	525.224	385.906	853.604	493.269	398.368	867.793	423.195	319.555	866.919	446.248	232.254	850.622	432.291
449	4.48	551.271	1261.78	265.915	598.576	1250.05	195.173	600.135	1250.54	329.579	717.842	1119.34	127.726	715.199	1122.91	388.339	618.31	1063.22	258.47	617.438	844.183	-16.3346	369.504	860.446	35.8857	383.001	860.108	104.214	303.565	866.126	76.8041	215.733	848.923	94.4657	641.38	845.806	525.402	385.758	853.247	493.438	398.342	867.697	423.37	319.684	866.84	446.439	232.249	850.57	432.367
450	4.49	551.4	1261.8	266.061	598.709	1250.15	195.314	600.304	1250.38	329.734	717.868	1119.26	127.666	715.14	1122.72	388.401	618.347	1063.25	258.409	617.484	844.081	-16.3156	369.472	860.428	35.9172	383.03	860.072	104.223	303.564	866.095	76.7946	215.717	848.911	94.4842	641.441	845.666	525.562	385.671	852.888	493.578	398.37	867.604	423.536	319.787	866.74	446.619	232.268	850.498	432.437
451	4.5	551.659	1261.75	266.162	598.887	1250.26	195.428	600.558	1250.26	329.842	717.908	1119.22	127.607	715.129	1122.53	388.468	618.412	1063.26	258.321	617.505	843.96	-16.3204	369.542	860.394	35.8835	383.083	860.031	104.184	303.584	866.075	76.7817	215.769	848.816	94.4465	641.517	845.518	525.699	385.684	852.487	493.727	398.385	867.506	423.693	319.904	866.621	446.773	232.32	850.417	432.492
452	4.51	551.922	1261.7	266.238	599.054	1250.36	195.513	600.71	1250.2	329.957	718.006	1119.21	127.559	715.146	1122.36	388.523	618.439	1063.26	258.235	617.484	843.85	-16.3345	369.613	860.315	35.8113	383.161	859.992	104.123	303.635	866.054	76.7615	215.822	848.721	94.4308	641.565	845.366	525.803	385.781	852.069	493.889	398.433	867.422	423.854	320.053	866.498	446.891	232.412	850.324	432.526
[truncated: 301 more rows]

## Sheet: Trial02
PathFileType	4	(X/Y/Z)	Trial02.trc
DataRate	CameraRate	NumFrames	NumMarkers	Units	OrigDataRate	OrigDataStartFrame	OrigNumFrames
100	100	642	16	mm	100	1	642
[truncated: 644 more rows]

## Sheet: Trial03
PathFileType	4	(X/Y/Z)	Trial03.trc
DataRate	CameraRate	NumFrames	NumMarkers	Units	OrigDataRate	OrigDataStartFrame	OrigNumFrames
100	100	557	16	mm	100	1	557
[truncated: 559 more rows]
