# Supplementary material for: Upper-Limb Kinematic Variables are correlated with Fugl-Meyer Assessment Sub Scales During a Hand-to-Mouth Functional Task in Post-Stroke Individuals
Source: Research Square preprint supplement (doi:10.21203/rs.3.rs-8270137/v1), 2025-12-16
Supplement: Supplementary file 25 [file Additional file 4.xls]

## Sheet: Static
PathFileType	4	(X/Y/Z)	Static.trc
DataRate	CameraRate	NumFrames	NumMarkers	Units	OrigDataRate	OrigDataStartFrame	OrigNumFrames
100	100	623	17	mm	100	1	623
Frame#	Time	nasion			r zyg pr			l zyg pr			r should			l should			sternum			r elbow			r ulna			r radius			r hand			r finger			l elbow			l ulna			l radius			l hand			l finger
		X1	Y1	Z1	X2	Y2	Z2	X3	Y3	Z3	X4	Y4	Z4	X5	Y5	Z5	X6	Y6	Z6	X7	Y7	Z7	X8	Y8	Z8	X9	Y9	Z9	X10	Y10	Z10	X11	Y11	Z11	X12	Y12	Z12	X13	Y13	Z13	X14	Y14	Z14	X15	Y15	Z15	X16	Y16	Z16
1	0	692.554	1397.68	169.639	737.446	1375.58	96.0504	727.983	1363.81	244.028	802.187	1170.16	8.70842	776.132	1191.36	329.396	701.191	1153.2	154.372	804.219	859.393	-163.581	519.13	885.741	-144.892	533.796	898.803	-61.4425	437.956	905.232	-77.4895	345.594	881.153	-70.5374	768.173	853.466	487.363	484.32	868.414	499.445	487.294	888.416	416.666	399.733	924.533	435.354	304.285	884.83	413.507
2	0.01	692.872	1397.72	169.704	737.378	1375.73	96.156	728.108	1363.78	244.129	802.147	1170.15	8.679	776.074	1191.42	329.347	701.216	1153.15	154.35	804.177	859.383	-163.61	519.052	885.759	-144.884	533.633	898.8	-61.3916	437.854	905.279	-77.4458	345.527	881.188	-70.518	768.14	853.538	487.361	484.389	868.434	499.458	487.25	888.454	416.656	399.781	924.552	435.295	304.205	884.849	413.491
3	0.02	693.1	1397.78	169.819	737.321	1375.84	96.2539	728.204	1363.75	244.241	802.098	1170.12	8.63883	776.013	1191.46	329.315	701.273	1153.12	154.3	804.156	859.376	-163.606	519.028	885.749	-144.897	533.584	898.803	-61.3974	437.868	905.292	-77.4556	345.506	881.194	-70.5277	768.102	853.619	487.366	484.369	868.45	499.446	487.239	888.492	416.645	399.58	924.657	435.295	304.138	884.855	413.477
4	0.03	693.309	1397.83	169.943	737.389	1375.95	96.3318	728.316	1363.7	244.354	802.114	1170.09	8.60286	775.957	1191.49	329.296	701.323	1153.13	154.318	804.189	859.382	-163.603	519.05	885.711	-144.903	533.591	898.77	-61.3917	437.876	905.291	-77.4547	345.534	881.172	-70.5549	768.104	853.702	487.385	484.303	868.444	499.44	487.276	888.49	416.653	399.442	924.699	435.327	304.117	884.853	413.487
5	0.04	693.569	1397.82	170.064	737.394	1376.05	96.4196	728.433	1363.64	244.484	802.165	1170.08	8.58049	775.927	1191.53	329.278	701.39	1153.16	154.325	804.219	859.397	-163.611	519.061	885.695	-144.889	533.571	898.763	-61.3796	437.871	905.284	-77.4542	345.529	881.166	-70.5362	768.118	853.788	487.41	484.238	868.421	499.425	487.248	888.495	416.636	399.566	924.63	435.293	304.111	884.847	413.496
6	0.05	693.593	1397.86	170.213	737.378	1376.13	96.5248	728.555	1363.6	244.603	802.183	1170.08	8.56702	775.915	1191.58	329.254	701.438	1153.21	154.272	804.175	859.365	-163.643	519.039	885.717	-144.873	533.59	898.785	-61.3846	437.883	905.28	-77.4555	345.515	881.17	-70.5272	768.096	853.847	487.411	484.21	868.395	499.424	487.2	888.513	416.627	399.642	924.609	435.248	304.094	884.839	413.49
7	0.06	693.445	1397.96	170.397	737.382	1376.23	96.6229	728.636	1363.56	244.692	802.226	1170.09	8.551	775.917	1191.63	329.222	701.454	1153.25	154.206	804.124	859.333	-163.672	519.01	885.732	-144.891	533.519	898.806	-61.3635	437.874	905.285	-77.4691	345.536	881.169	-70.55	768.062	853.902	487.428	484.267	868.425	499.414	487.213	888.524	416.625	399.572	924.644	435.241	304.067	884.832	413.494
8	0.07	693.458	1398.04	170.586	737.447	1376.33	96.6865	728.745	1363.52	244.805	802.332	1170.12	8.52967	775.954	1191.69	329.184	701.462	1153.29	154.173	804.092	859.357	-163.698	519.006	885.755	-144.909	533.554	898.829	-61.3793	437.89	905.299	-77.4681	345.531	881.185	-70.5387	768.069	853.981	487.442	484.346	868.489	499.417	487.25	888.552	416.639	399.576	924.642	435.198	304.097	884.826	413.504
9	0.08	693.384	1398.12	170.812	737.498	1376.42	96.7686	728.874	1363.48	244.935	802.451	1170.17	8.53178	775.998	1191.76	329.16	701.477	1153.35	154.155	804.074	859.365	-163.732	519.003	885.793	-144.912	533.578	898.879	-61.3878	437.871	905.317	-77.4494	345.507	881.21	-70.517	768.101	854.076	487.444	484.385	868.53	499.409	487.314	888.576	416.655	399.659	924.596	435.171	304.119	884.831	413.499
10	0.09	693.357	1398.14	170.988	737.491	1376.49	96.8649	729.009	1363.42	245.066	802.543	1170.21	8.53651	776.034	1191.82	329.137	701.541	1153.39	154.113	804.053	859.412	-163.783	518.976	885.841	-144.895	533.574	898.91	-61.404	437.852	905.347	-77.45	345.454	881.222	-70.5022	768.074	854.156	487.445	484.414	868.554	499.409	487.315	888.599	416.638	399.656	924.6	435.18	304.111	884.827	413.493
11	0.1	693.42	1398.11	171.203	737.48	1376.54	96.9685	729.132	1363.35	245.184	802.606	1170.23	8.51918	776.059	1191.86	329.1	701.593	1153.43	154.084	804.016	859.463	-163.812	518.947	885.858	-144.886	533.587	898.908	-61.4025	437.843	905.338	-77.4275	345.478	881.208	-70.5053	768.071	854.25	487.46	484.424	868.565	499.425	487.303	888.617	416.646	399.596	924.623	435.186	304.074	884.822	413.482
12	0.11	693.384	1398.15	171.513	737.458	1376.6	97.1192	729.263	1363.25	245.299	802.703	1170.23	8.49339	776.126	1191.89	329.07	701.729	1153.4	154.1	803.992	859.513	-163.834	518.959	885.818	-144.877	533.593	898.863	-61.4158	437.861	905.293	-77.4151	345.511	881.166	-70.4862	768.103	854.339	487.484	484.435	868.567	499.432	487.306	888.612	416.662	399.659	924.571	435.185	304.063	884.815	413.474
13	0.12	693.139	1398.27	171.862	737.418	1376.68	97.3077	729.378	1363.16	245.416	802.803	1170.22	8.47552	776.153	1191.91	329.032	701.863	1153.34	154.079	803.972	859.565	-163.878	518.97	885.789	-144.872	533.599	898.817	-61.425	437.867	905.249	-77.4358	345.561	881.115	-70.5143	768.137	854.433	487.508	484.409	868.594	499.422	487.261	888.621	416.649	399.617	924.586	435.185	304.072	884.803	413.476
14	0.13	692.932	1398.33	172.168	737.396	1376.75	97.5016	729.477	1363.06	245.505	802.866	1170.23	8.45048	776.173	1191.91	328.971	701.912	1153.29	154.02	803.918	859.589	-163.94	518.962	885.77	-144.89	533.566	898.77	-61.4372	437.877	905.213	-77.4621	345.562	881.082	-70.5503	768.162	854.507	487.544	484.398	868.624	499.401	487.244	888.642	416.633	399.443	924.657	435.175	304.055	884.803	413.463
15	0.14	692.961	1398.36	172.408	737.404	1376.83	97.6729	729.616	1362.98	245.6	802.943	1170.23	8.42686	776.225	1191.93	328.901	701.952	1153.28	153.942	803.903	859.616	-163.994	518.971	885.747	-144.938	533.643	898.737	-61.4919	437.903	905.206	-77.4917	345.599	881.067	-70.5805	768.18	854.559	487.579	484.425	868.645	499.397	487.26	888.648	416.604	399.458	924.648	435.16	304.082	884.807	413.453
16	0.15	693.071	1398.39	172.658	737.392	1376.91	97.8847	729.834	1362.89	245.746	803.041	1170.25	8.40975	776.311	1191.96	328.857	701.903	1153.31	153.911	803.94	859.652	-164.021	518.973	885.776	-144.954	533.639	898.801	-61.4853	437.947	905.216	-77.5162	345.598	881.119	-70.5696	768.22	854.622	487.607	484.472	868.71	499.427	487.281	888.65	416.597	399.49	924.667	435.145	304.101	884.823	413.452
17	0.16	693.162	1398.38	172.873	737.359	1377.03	98.1252	730.054	1362.75	245.927	803.142	1170.32	8.40575	776.367	1192.01	328.846	701.871	1153.32	153.894	803.939	859.678	-164.042	518.954	885.84	-144.926	533.604	898.917	-61.4725	437.891	905.272	-77.4869	345.544	881.163	-70.5356	768.273	854.677	487.638	484.539	868.762	499.441	487.29	888.659	416.635	399.564	924.637	435.166	304.101	884.838	413.469
18	0.17	693.426	1398.29	173.075	737.326	1377.13	98.3649	730.258	1362.6	246.13	803.212	1170.36	8.40521	776.389	1192.04	328.823	701.849	1153.31	153.892	803.917	859.706	-164.075	518.901	885.918	-144.912	533.644	899.001	-61.4677	437.866	905.319	-77.4711	345.484	881.226	-70.5183	768.321	854.715	487.666	484.564	868.765	499.448	487.301	888.691	416.654	399.682	924.589	435.184	304.132	884.841	413.489
19	0.18	693.868	1398.14	173.251	737.313	1377.18	98.5751	730.457	1362.44	246.309	803.28	1170.39	8.40398	776.422	1192.05	328.792	701.851	1153.3	153.853	803.909	859.703	-164.092	518.891	885.951	-144.918	533.675	899.029	-61.4823	437.817	905.338	-77.4426	345.493	881.253	-70.516	768.343	854.733	487.683	484.542	868.743	499.448	487.334	888.72	416.66	399.721	924.574	435.129	304.155	884.831	413.493
20	0.19	694.292	1398.01	173.523	737.329	1377.25	98.8127	730.673	1362.27	246.479	803.363	1170.38	8.398	776.466	1192.05	328.742	701.909	1153.26	153.797	803.932	859.71	-164.105	518.908	885.938	-144.947	533.717	899.03	-61.5159	437.848	905.344	-77.4368	345.531	881.246	-70.5224	768.376	854.755	487.696	484.561	868.729	499.43	487.333	888.706	416.662	399.786	924.512	435.118	304.164	884.812	413.492
21	0.2	694.548	1397.94	173.846	737.242	1377.33	99.0664	730.876	1362.14	246.65	803.415	1170.36	8.36761	776.497	1192.02	328.706	701.959	1153.2	153.762	803.928	859.706	-164.102	518.89	885.931	-144.922	533.686	899.009	-61.4892	437.855	905.324	-77.4506	345.543	881.237	-70.5088	768.354	854.746	487.679	484.513	868.689	499.415	487.314	888.696	416.673	399.817	924.493	435.138	304.162	884.796	413.493
22	0.21	694.713	1397.93	174.164	737.177	1377.42	99.2942	731.069	1362.04	246.822	803.447	1170.34	8.34386	776.54	1191.99	328.683	702.008	1153.16	153.751	803.903	859.696	-164.12	518.876	885.914	-144.899	533.609	898.992	-61.4434	437.809	905.311	-77.4345	345.5	881.225	-70.4981	768.35	854.764	487.662	484.542	868.707	499.422	487.34	888.658	416.653	399.743	924.509	435.184	304.143	884.801	413.496
23	0.22	694.714	1398.02	174.487	737.255	1377.46	99.4844	731.219	1361.94	246.951	803.489	1170.31	8.33155	776.58	1191.98	328.652	702.035	1153.1	153.74	803.903	859.706	-164.135	518.905	885.863	-144.904	533.605	898.959	-61.4464	437.838	905.281	-77.4486	345.495	881.209	-70.5185	768.327	854.753	487.643	484.556	868.74	499.431	487.322	888.671	416.633	399.661	924.552	435.175	304.153	884.795	413.496
24	0.23	694.838	1398.08	174.733	737.306	1377.55	99.6219	731.345	1361.86	247.053	803.521	1170.29	8.30015	776.598	1191.95	328.593	702.167	1152.94	153.671	803.876	859.727	-164.123	518.96	885.822	-144.942	533.643	898.893	-61.4855	437.898	905.277	-77.4622	345.56	881.162	-70.5501	768.306	854.743	487.603	484.575	868.771	499.422	487.31	888.692	416.618	399.612	924.61	435.157	304.133	884.799	413.472
25	0.24	694.763	1398.19	174.98	737.335	1377.66	99.782	731.499	1361.79	247.163	803.557	1170.31	8.26601	776.59	1191.93	328.55	702.294	1152.82	153.608	803.872	859.745	-164.139	518.927	885.817	-144.96	533.674	898.852	-61.5138	437.892	905.268	-77.4583	345.639	881.129	-70.5867	768.277	854.74	487.572	484.593	868.785	499.401	487.244	888.686	416.577	399.553	924.642	435.141	304.117	884.792	413.453
26	0.25	694.649	1398.34	175.204	737.401	1377.71	99.9097	731.587	1361.76	247.293	803.598	1170.34	8.26427	776.558	1191.93	328.558	702.286	1152.83	153.6	803.871	859.773	-164.171	518.914	885.838	-144.951	533.654	898.878	-61.5103	437.902	905.253	-77.4685	345.596	881.143	-70.5573	768.25	854.714	487.548	484.555	868.758	499.391	487.217	888.694	416.594	399.433	924.687	435.143	304.092	884.791	413.456
27	0.26	694.743	1398.4	175.356	737.539	1377.78	100.007	731.703	1361.75	247.426	803.616	1170.37	8.30356	776.543	1191.93	328.58	702.09	1152.94	153.661	803.855	859.789	-164.191	518.916	885.865	-144.917	533.611	898.95	-61.4684	437.887	905.253	-77.4444	345.508	881.177	-70.492	768.228	854.684	487.526	484.5	868.721	499.406	487.218	888.69	416.61	399.464	924.689	435.152	304.071	884.801	413.475
28	0.27	694.872	1398.41	175.472	737.692	1377.82	100.067	731.805	1361.74	247.55	803.669	1170.42	8.33347	776.519	1191.91	328.598	701.98	1153.02	153.699	803.811	859.8	-164.209	518.914	885.878	-144.887	533.666	898.991	-61.4555	437.849	905.251	-77.4128	345.489	881.199	-70.4748	768.215	854.652	487.477	484.498	868.695	499.373	487.202	888.688	416.593	399.588	924.619	435.132	304.08	884.815	413.475
29	0.28	694.894	1398.49	175.564	737.832	1377.87	100.13	731.918	1361.75	247.627	803.698	1170.47	8.33336	776.515	1191.88	328.598	701.957	1153.01	153.697	803.801	859.833	-164.258	518.911	885.902	-144.897	533.699	899.004	-61.4704	437.831	905.255	-77.411	345.507	881.181	-70.4933	768.198	854.594	487.434	484.46	868.649	499.354	487.241	888.678	416.597	399.701	924.534	435.105	304.086	884.817	413.469
30	0.29	694.87	1398.6	175.641	737.92	1377.94	100.197	731.971	1361.76	247.705	803.663	1170.49	8.33957	776.478	1191.87	328.622	701.864	1153.06	153.739	803.822	859.863	-164.303	518.882	885.928	-144.902	533.646	899.022	-61.4501	437.82	905.278	-77.4134	345.476	881.184	-70.483	768.167	854.516	487.391	484.479	868.648	499.359	487.326	888.649	416.613	399.745	924.473	435.144	304.089	884.825	413.475
31	0.3	694.866	1398.68	175.69	737.945	1377.98	100.25	731.988	1361.75	247.76	803.627	1170.49	8.34787	776.441	1191.84	328.64	701.862	1153.06	153.74	803.801	859.891	-164.293	518.878	885.931	-144.898	533.636	899.029	-61.4504	437.855	905.279	-77.42	345.474	881.184	-70.472	768.162	854.463	487.375	484.495	868.692	499.358	487.383	888.62	416.63	399.816	924.475	435.159	304.073	884.842	413.478
32	0.31	694.94	1398.74	175.663	737.988	1378.01	100.293	732.02	1361.73	247.771	803.593	1170.49	8.3521	776.443	1191.79	328.615	702.006	1152.99	153.69	803.803	859.958	-164.312	518.895	885.919	-144.941	533.663	898.987	-61.4773	437.873	905.258	-77.4326	345.54	881.172	-70.5077	768.179	854.438	487.366	484.512	868.704	499.367	487.434	888.598	416.615	399.767	924.511	435.172	304.081	884.842	413.452
33	0.32	694.939	1398.76	175.664	738.057	1378.02	100.296	732.124	1361.72	247.759	803.581	1170.48	8.35831	776.432	1191.73	328.609	702.17	1152.85	153.635	803.841	860.001	-164.353	518.902	885.904	-144.974	533.686	898.942	-61.5172	437.892	905.238	-77.4515	345.591	881.148	-70.5533	768.16	854.39	487.333	484.499	868.663	499.34	487.403	888.573	416.601	399.813	924.511	435.135	304.127	884.827	413.431
34	0.33	695.058	1398.73	175.662	738.134	1378	100.302	732.152	1361.71	247.786	803.563	1170.49	8.39218	776.38	1191.68	328.646	702.145	1152.81	153.688	803.847	860.039	-164.357	518.868	885.894	-144.947	533.613	898.947	-61.4804	437.881	905.236	-77.4415	345.566	881.15	-70.5494	768.144	854.338	487.327	484.474	868.61	499.348	487.362	888.555	416.598	399.807	924.516	435.111	304.127	884.809	413.441
35	0.34	695.036	1398.68	175.684	738.109	1377.95	100.344	732.16	1361.72	247.834	803.549	1170.51	8.45633	776.354	1191.66	328.717	701.99	1152.88	153.802	803.872	860.085	-164.343	518.868	885.9	-144.911	533.597	898.969	-61.4304	437.875	905.248	-77.4104	345.531	881.143	-70.5005	768.143	854.301	487.346	484.456	868.567	499.361	487.359	888.535	416.594	399.73	924.548	435.147	304.118	884.805	413.472
36	0.35	695.052	1398.62	175.652	738.161	1377.91	100.309	732.132	1361.76	247.848	803.537	1170.54	8.50011	776.344	1191.63	328.768	701.886	1152.96	153.887	803.886	860.097	-164.349	518.851	885.909	-144.893	533.596	898.986	-61.4215	437.838	905.233	-77.3933	345.503	881.14	-70.4721	768.142	854.276	487.346	484.408	868.528	499.365	487.31	888.541	416.584	399.7	924.564	435.163	304.084	884.809	413.479
37	0.36	695.041	1398.62	175.646	738.184	1377.88	100.284	732.056	1361.8	247.844	803.516	1170.57	8.52099	776.314	1191.6	328.802	701.833	1152.98	153.931	803.863	860.104	-164.35	518.818	885.926	-144.878	533.592	899.016	-61.4322	437.811	905.224	-77.3996	345.458	881.164	-70.4676	768.139	854.229	487.335	484.402	868.523	499.348	487.3	888.557	416.581	399.627	924.595	435.171	304.055	884.82	413.469
38	0.37	695.049	1398.61	175.63	738.101	1377.87	100.307	731.999	1361.82	247.851	803.461	1170.59	8.55727	776.294	1191.57	328.841	701.784	1153.02	153.989	803.793	860.002	-164.47	518.778	885.961	-144.864	533.631	899.054	-61.4437	437.832	905.231	-77.3977	345.419	881.194	-70.4601	768.116	854.165	487.355	484.376	868.52	499.348	487.303	888.57	416.597	399.566	924.612	435.219	304.065	884.825	413.487
39	0.38	694.972	1398.6	175.631	738.073	1377.85	100.311	731.975	1361.83	247.87	803.426	1170.6	8.6137	776.317	1191.53	328.88	701.703	1153.08	154.043	803.741	859.871	-164.604	518.763	885.979	-144.842	533.611	899.067	-61.4137	437.817	905.247	-77.39	345.384	881.216	-70.439	768.097	854.104	487.398	484.358	868.513	499.372	487.257	888.579	416.622	399.561	924.633	435.225	304.086	884.83	413.487
40	0.39	694.902	1398.59	175.599	738.019	1377.83	100.3	731.929	1361.85	247.847	803.399	1170.59	8.63317	776.311	1191.48	328.888	701.659	1153.11	154.062	803.805	860.049	-164.329	518.774	885.976	-144.858	533.568	899.057	-61.3937	437.789	905.263	-77.3896	345.421	881.222	-70.4564	768.11	854.025	487.414	484.403	868.531	499.397	487.288	888.548	416.599	399.594	924.622	435.209	304.095	884.843	413.481
41	0.4	694.862	1398.54	175.579	737.939	1377.78	100.261	731.826	1361.83	247.828	803.354	1170.58	8.63131	776.326	1191.42	328.887	701.64	1153.12	154.07	803.791	860.079	-164.238	518.804	885.95	-144.875	533.54	899.036	-61.4037	437.777	905.264	-77.4057	345.436	881.209	-70.4928	768.124	853.959	487.405	484.485	868.552	499.395	487.308	888.532	416.59	399.682	924.586	435.195	304.143	884.824	413.472
42	0.41	694.809	1398.48	175.517	737.899	1377.73	100.208	731.691	1361.78	247.825	803.3	1170.57	8.65342	776.322	1191.37	328.909	701.635	1153.15	154.109	803.773	860.058	-164.186	518.816	885.94	-144.863	533.474	899.001	-61.3708	437.789	905.27	-77.392	345.428	881.179	-70.4789	768.109	853.851	487.405	484.466	868.529	499.41	487.367	888.475	416.607	399.74	924.509	435.221	304.176	884.803	413.489
43	0.42	694.775	1398.34	175.43	737.822	1377.65	100.187	731.519	1361.77	247.833	803.26	1170.57	8.71849	776.308	1191.31	328.952	701.627	1153.17	154.145	803.771	860.044	-164.115	518.814	885.939	-144.823	533.447	898.985	-61.3286	437.799	905.267	-77.3854	345.439	881.159	-70.4608	768.106	853.759	487.423	484.376	868.477	499.41	487.362	888.457	416.641	399.709	924.499	435.223	304.159	884.813	413.506
44	0.43	694.791	1398.14	175.362	737.741	1377.55	100.191	731.315	1361.75	247.83	803.209	1170.58	8.75787	776.301	1191.27	328.989	701.63	1153.17	154.203	803.785	860.046	-164.077	518.817	885.915	-144.793	533.487	898.991	-61.3289	437.791	905.244	-77.3929	345.411	881.16	-70.4428	768.112	853.678	487.425	484.332	868.446	499.418	487.384	888.461	416.651	399.716	924.53	435.243	304.153	884.83	413.506
45	0.44	694.611	1397.96	175.317	737.658	1377.45	100.142	731.127	1361.71	247.824	803.178	1170.58	8.77855	776.315	1191.24	329.022	701.606	1153.16	154.25	803.774	860.034	-164.042	518.821	885.907	-144.778	533.444	898.986	-61.3013	437.78	905.213	-77.4035	345.398	881.151	-70.4462	768.11	853.595	487.4	484.272	868.389	499.413	487.396	888.442	416.65	399.772	924.495	435.262	304.151	884.828	413.507
46	0.45	694.49	1397.76	175.264	737.52	1377.39	100.143	730.935	1361.66	247.824	803.153	1170.59	8.81583	776.324	1191.21	329.065	701.604	1153.15	154.288	803.801	860.037	-163.995	518.839	885.875	-144.77	533.437	898.971	-61.2809	437.768	905.223	-77.3962	345.372	881.155	-70.4312	768.1	853.507	487.382	484.27	868.367	499.417	487.347	888.447	416.648	399.779	924.493	435.246	304.16	884.842	413.509
47	0.46	694.246	1397.62	175.265	737.456	1377.32	100.129	730.748	1361.63	247.838	803.135	1170.6	8.86056	776.351	1191.17	329.109	701.612	1153.14	154.333	803.857	860.06	-163.936	518.842	885.862	-144.734	533.457	898.982	-61.2582	437.762	905.222	-77.3707	345.35	881.161	-70.4159	768.117	853.42	487.36	484.345	868.386	499.414	487.32	888.443	416.646	399.808	924.49	435.234	304.152	884.86	413.515
48	0.47	694.09	1397.41	175.188	737.322	1377.24	100.106	730.509	1361.58	247.83	803.105	1170.6	8.88775	776.392	1191.12	329.143	701.616	1153.14	154.36	803.866	860.073	-163.901	518.854	885.851	-144.735	533.426	898.974	-61.252	437.749	905.247	-77.3546	345.372	881.172	-70.4417	768.164	853.329	487.323	484.356	868.376	499.412	487.343	888.433	416.641	399.704	924.587	435.247	304.152	884.867	413.508
49	0.48	693.977	1397.16	175.059	737.263	1377.15	100.043	730.288	1361.52	247.797	803.093	1170.58	8.88911	776.406	1191.06	329.159	701.674	1153.1	154.369	803.878	860.078	-163.869	518.881	885.834	-144.788	533.404	898.946	-61.2637	437.748	905.253	-77.3575	345.406	881.159	-70.4891	768.198	853.237	487.292	484.338	868.366	499.38	487.385	888.409	416.616	399.71	924.612	435.234	304.183	884.871	413.495
50	0.49	693.607	1397.03	175.035	737.134	1377.07	100.042	730.075	1361.44	247.799	803.108	1170.57	8.90856	776.407	1191.01	329.174	701.689	1153.06	154.386	803.88	860.085	-163.849	518.884	885.835	-144.802	533.411	898.928	-61.2703	437.79	905.226	-77.3814	345.42	881.153	-70.5116	768.213	853.147	487.274	484.326	868.362	499.37	487.409	888.395	416.621	399.733	924.58	435.24	304.205	884.869	413.498
51	0.5	693.275	1396.89	175.037	736.979	1376.99	100.076	729.937	1361.37	247.853	803.132	1170.58	8.97354	776.446	1190.99	329.231	701.646	1153.08	154.45	803.909	860.097	-163.834	518.882	885.833	-144.757	533.414	898.947	-61.2523	437.809	905.231	-77.3979	345.381	881.179	-70.4667	768.276	853.047	487.233	484.339	868.327	499.397	487.375	888.39	416.634	399.767	924.582	435.223	304.213	884.852	413.51
52	0.51	693.18	1396.71	175.026	736.874	1376.9	100.059	729.775	1361.29	247.894	803.143	1170.6	9.04031	776.482	1190.95	329.271	701.602	1153.11	154.502	803.913	860.115	-163.839	518.873	885.86	-144.725	533.43	898.981	-61.2411	437.747	905.257	-77.3765	345.324	881.189	-70.4334	768.318	852.936	487.185	484.305	868.301	499.386	487.354	888.383	416.61	399.844	924.544	435.24	304.226	884.839	413.524
53	0.52	692.938	1396.57	174.994	736.708	1376.83	100.044	729.616	1361.21	247.928	803.145	1170.62	9.07477	776.492	1190.92	329.3	701.612	1153.07	154.516	803.925	860.125	-163.838	518.85	885.898	-144.727	533.461	899.003	-61.2495	437.713	905.261	-77.3622	345.303	881.202	-70.4573	768.352	852.841	487.158	484.255	868.264	499.372	487.39	888.358	416.609	399.949	924.449	435.243	304.241	884.826	413.517
54	0.53	692.618	1396.49	175.012	736.553	1376.77	100.074	729.482	1361.15	247.972	803.172	1170.61	9.09988	776.505	1190.89	329.32	701.612	1153.04	154.536	803.971	860.145	-163.824	518.855	885.9	-144.751	533.497	899.025	-61.2705	437.732	905.253	-77.3792	345.352	881.194	-70.4838	768.397	852.741	487.155	484.273	868.253	499.363	487.453	888.324	416.619	399.949	924.438	435.23	304.278	884.81	413.516
55	0.54	692.412	1396.44	175.079	736.388	1376.72	100.114	729.352	1361.09	248.005	803.22	1170.62	9.13562	776.531	1190.86	329.355	701.657	1153.01	154.581	803.987	860.17	-163.824	518.863	885.903	-144.727	533.495	899.026	-61.2714	437.743	905.247	-77.3641	345.402	881.174	-70.483	768.44	852.667	487.142	484.327	868.247	499.36	487.48	888.338	416.617	399.87	924.501	435.213	304.34	884.805	413.518
56	0.55	692.267	1396.39	175.106	736.216	1376.68	100.159	729.194	1361.04	248.034	803.237	1170.63	9.17196	776.559	1190.83	329.391	701.659	1152.97	154.61	803.965	860.206	-163.83	518.875	885.905	-144.732	533.433	899.001	-61.2318	437.753	905.226	-77.3633	345.4	881.175	-70.4536	768.469	852.611	487.134	484.317	868.262	499.363	487.463	888.373	416.625	399.886	924.523	435.22	304.341	884.824	413.532
57	0.56	692.066	1396.34	175.102	736.096	1376.61	100.148	729.047	1361	248.052	803.193	1170.63	9.17147	776.545	1190.78	329.4	701.65	1152.94	154.6	803.95	860.208	-163.845	518.904	885.882	-144.775	533.363	898.968	-61.2198	437.751	905.22	-77.3918	345.401	881.149	-70.4814	768.476	852.572	487.148	484.281	868.242	499.382	487.406	888.351	416.607	399.84	924.536	435.219	304.308	884.844	413.513
58	0.57	691.899	1396.29	175.125	736.014	1376.53	100.12	728.861	1360.96	248.09	803.146	1170.61	9.16515	776.518	1190.74	329.401	701.668	1152.93	154.604	803.933	860.213	-163.848	518.912	885.854	-144.812	533.377	898.96	-61.2626	437.779	905.182	-77.4329	345.438	881.112	-70.5237	768.431	852.523	487.165	484.25	868.232	499.386	487.369	888.334	416.599	399.752	924.606	435.219	304.309	884.851	413.498
59	0.58	691.922	1396.14	175.159	735.854	1376.45	100.165	728.726	1360.92	248.126	803.125	1170.61	9.19215	776.5	1190.72	329.421	701.69	1152.88	154.647	803.941	860.246	-163.841	518.885	885.855	-144.79	533.432	898.968	-61.2762	437.796	905.173	-77.443	345.435	881.108	-70.5037	768.417	852.497	487.184	484.197	868.204	499.402	487.336	888.332	416.598	399.777	924.619	435.224	304.296	884.859	413.506
60	0.59	691.752	1396.03	175.261	735.657	1376.36	100.231	728.569	1360.89	248.178	803.093	1170.62	9.24864	776.468	1190.71	329.46	701.676	1152.86	154.711	803.893	860.157	-163.949	518.877	885.849	-144.74	533.43	898.974	-61.268	437.766	905.198	-77.4097	345.379	881.132	-70.4681	768.407	852.463	487.203	484.186	868.191	499.43	487.346	888.32	416.611	399.736	924.583	435.279	304.245	884.877	413.522
61	0.6	691.419	1395.98	175.35	735.468	1376.3	100.275	728.465	1360.85	248.22	803.033	1170.63	9.27012	776.445	1190.7	329.48	701.653	1152.84	154.756	803.741	859.893	-164.241	518.847	885.846	-144.728	533.408	898.991	-61.2634	437.732	905.215	-77.4034	345.308	881.146	-70.436	768.388	852.452	487.235	484.175	868.159	499.439	487.363	888.324	416.642	399.671	924.59	435.319	304.223	884.877	413.527
62	0.61	691.201	1395.92	175.372	735.322	1376.24	100.287	728.418	1360.8	248.242	803.016	1170.62	9.27067	776.467	1190.66	329.5	701.659	1152.81	154.782	803.782	859.934	-164.182	518.854	885.829	-144.729	533.437	898.988	-61.2747	437.733	905.212	-77.4153	345.355	881.128	-70.4553	768.407	852.432	487.278	484.179	868.139	499.431	487.396	888.331	416.661	399.738	924.546	435.298	304.259	884.867	413.523
63	0.62	691.107	1395.89	175.425	735.231	1376.2	100.321	728.358	1360.78	248.265	803.002	1170.61	9.30284	776.492	1190.65	329.513	701.678	1152.8	154.791	803.902	860.165	-163.855	518.889	885.83	-144.733	533.407	898.983	-61.232	437.747	905.21	-77.3703	345.386	881.116	-70.4695	768.418	852.384	487.339	484.205	868.153	499.437	487.42	888.315	416.676	399.872	924.496	435.333	304.311	884.855	413.534
64	0.63	690.942	1395.88	175.461	735.074	1376.15	100.368	728.273	1360.76	248.293	802.962	1170.61	9.3294	776.5	1190.64	329.528	701.593	1152.82	154.833	803.927	860.224	-163.751	518.881	885.843	-144.725	533.389	899.005	-61.1962	437.747	905.22	-77.3488	345.35	881.157	-70.4543	768.403	852.348	487.372	484.24	868.173	499.463	487.469	888.302	416.699	399.929	924.495	435.354	304.309	884.856	413.527
65	0.64	690.736	1395.87	175.478	734.885	1376.14	100.393	728.175	1360.73	248.295	802.917	1170.6	9.33054	776.477	1190.62	329.528	701.496	1152.85	154.84	803.939	860.225	-163.73	518.875	885.854	-144.744	533.388	899.029	-61.2156	437.721	905.237	-77.3609	345.351	881.181	-70.4746	768.393	852.302	487.379	484.24	868.176	499.448	487.461	888.27	416.683	400.047	924.436	435.296	304.314	884.863	413.514
66	0.65	690.632	1395.84	175.475	734.826	1376.13	100.346	728.1	1360.7	248.286	802.904	1170.58	9.30553	776.462	1190.6	329.516	701.553	1152.82	154.804	803.939	860.224	-163.717	518.894	885.834	-144.771	533.379	899.017	-61.2377	437.755	905.224	-77.4155	345.381	881.153	-70.5106	768.397	852.266	487.377	484.297	868.183	499.436	487.461	888.251	416.66	400.106	924.427	435.242	304.335	884.867	413.501
67	0.66	690.635	1395.78	175.488	734.771	1376.1	100.354	728.071	1360.66	248.279	802.871	1170.58	9.30182	776.458	1190.58	329.508	701.608	1152.78	154.808	803.916	860.212	-163.728	518.889	885.834	-144.771	533.319	898.995	-61.2271	437.744	905.223	-77.4208	345.387	881.142	-70.5255	768.427	852.265	487.374	484.296	868.178	499.463	487.511	888.257	416.661	400.132	924.405	435.262	304.341	884.854	413.503
68	0.67	690.606	1395.72	175.487	734.64	1376.05	100.402	728.026	1360.64	248.303	802.82	1170.57	9.29365	776.438	1190.57	329.518	701.602	1152.76	154.818	803.944	860.217	-163.732	518.859	885.85	-144.728	533.318	898.988	-61.2081	437.695	905.24	-77.3894	345.347	881.164	-70.4979	768.446	852.259	487.367	484.265	868.165	499.471	487.447	888.256	416.658	400.037	924.422	435.315	304.327	884.849	413.513
69	0.68	690.571	1395.65	175.479	734.549	1376	100.419	727.95	1360.62	248.309	802.781	1170.57	9.29001	776.406	1190.58	329.536	701.602	1152.73	154.837	804.012	860.233	-163.742	518.846	885.851	-144.697	533.331	898.995	-61.1937	437.704	905.239	-77.3695	345.342	881.171	-70.4652	768.488	852.257	487.346	484.247	868.13	499.448	487.585	887.984	416.91	399.929	924.482	435.319	304.313	884.841	413.529
70	0.69	690.495	1395.62	175.467	734.469	1375.99	100.43	727.922	1360.61	248.299	802.73	1170.57	9.29414	776.386	1190.57	329.534	701.556	1152.7	154.855	804.024	860.232	-163.758	518.859	885.84	-144.704	533.352	898.977	-61.1979	437.692	905.231	-77.3501	345.317	881.171	-70.4408	768.5	852.227	487.314	484.197	868.096	499.436	487.824	887.611	417.202	399.893	924.51	435.279	304.321	884.833	413.539
71	0.7	690.485	1395.59	175.448	734.378	1375.98	100.409	727.879	1360.63	248.297	802.688	1170.55	9.28343	776.363	1190.56	329.549	701.559	1152.7	154.873	804.015	860.225	-163.748	518.892	885.803	-144.702	533.371	898.942	-61.1903	437.721	905.215	-77.3608	345.302	881.169	-70.4294	768.487	852.196	487.264	484.178	868.076	499.417	487.513	888.075	416.777	399.92	924.474	435.315	304.356	884.835	413.544
72	0.71	690.338	1395.65	175.433	734.368	1375.97	100.354	727.795	1360.67	248.275	802.669	1170.54	9.27598	776.332	1190.55	329.557	701.519	1152.7	154.88	803.949	860.196	-163.78	518.904	885.792	-144.708	533.353	898.953	-61.1858	437.717	905.214	-77.3711	345.306	881.166	-70.4373	768.482	852.158	487.222	484.192	868.099	499.428	487.4	888.194	416.665	399.811	924.519	435.354	304.361	884.845	413.548
73	0.72	690.174	1395.7	175.337	734.38	1375.95	100.282	727.739	1360.68	248.224	802.632	1170.54	9.25568	776.31	1190.53	329.537	701.467	1152.7	154.866	803.912	860.19	-163.788	518.883	885.81	-144.753	533.343	898.959	-61.2178	437.721	905.242	-77.394	345.33	881.156	-70.4696	768.495	852.106	487.201	484.229	868.091	499.414	487.369	888.234	416.64	399.836	924.548	435.3	304.351	884.837	413.534
74	0.73	690.173	1395.68	175.21	734.378	1375.93	100.219	727.672	1360.68	248.16	802.593	1170.53	9.22719	776.272	1190.5	329.522	701.436	1152.72	154.847	803.902	860.177	-163.788	518.862	885.813	-144.789	533.345	898.968	-61.2542	437.745	905.234	-77.4279	345.343	881.152	-70.5054	768.5	852.055	487.161	484.229	868.085	499.406	487.437	888.237	416.639	399.935	924.525	435.258	304.346	884.829	413.518
75	0.74	690.347	1395.6	175.126	734.347	1375.91	100.136	727.657	1360.7	248.114	802.585	1170.5	9.20537	776.248	1190.48	329.523	701.485	1152.7	154.818	803.889	860.168	-163.804	518.876	885.795	-144.806	533.363	898.953	-61.2668	437.783	905.208	-77.4587	345.386	881.123	-70.5152	768.518	852.017	487.134	484.237	868.084	499.395	487.434	888.209	416.621	400.015	924.463	435.27	304.346	884.83	413.506
76	0.75	690.229	1395.57	175.07	734.279	1375.87	100.108	727.612	1360.73	248.085	802.606	1170.49	9.20363	776.25	1190.47	329.539	701.502	1152.68	154.84	803.874	860.172	-163.812	518.917	885.784	-144.805	533.367	898.965	-61.2765	437.758	905.202	-77.4315	345.381	881.114	-70.4958	768.527	851.967	487.119	484.225	868.07	499.366	487.457	888.216	416.632	400.078	924.428	435.308	304.369	884.839	413.499
77	0.76	690.069	1395.52	174.965	734.26	1375.81	100.085	727.551	1360.74	248.058	802.611	1170.5	9.22099	776.233	1190.46	329.547	701.492	1152.67	154.873	803.882	860.185	-163.81	518.899	885.807	-144.768	533.364	898.974	-61.2508	437.712	905.222	-77.3905	345.342	881.131	-70.4668	768.521	851.921	487.091	484.252	868.057	499.367	487.648	887.925	416.909	400.099	924.394	435.312	304.374	884.829	413.503
78	0.77	689.966	1395.43	174.848	734.255	1375.76	100.042	727.452	1360.75	248.004	802.598	1170.52	9.23571	776.223	1190.47	329.555	701.462	1152.68	154.871	803.857	860.09	-163.953	518.856	885.825	-144.749	533.412	898.999	-61.2638	437.686	905.214	-77.3869	345.289	881.165	-70.4357	768.512	851.909	487.072	484.213	868.028	499.383	487.866	887.588	417.238	400.002	924.425	435.276	304.337	884.838	413.516
79	0.78	689.906	1395.36	174.684	734.22	1375.73	100.002	727.394	1360.78	247.957	802.622	1170.53	9.24864	776.238	1190.47	329.553	701.433	1152.71	154.888	803.806	859.887	-164.24	518.864	885.824	-144.746	533.447	899.025	-61.2765	437.704	905.245	-77.4004	345.278	881.176	-70.4248	768.515	851.908	487.053	484.215	868.053	499.373	487.698	887.798	417.034	399.882	924.491	435.262	304.29	884.859	413.511
80	0.79	689.827	1395.31	174.562	734.197	1375.7	99.9557	727.336	1360.8	247.883	802.662	1170.54	9.25643	776.262	1190.47	329.546	701.468	1152.71	154.889	803.805	859.947	-164.195	518.862	885.818	-144.751	533.408	899.002	-61.2705	437.731	905.234	-77.3983	345.314	881.174	-70.4556	768.51	851.923	487.036	484.23	868.083	499.376	488.037	887.277	417.453	399.819	924.55	435.285	304.301	884.879	413.519
81	0.8	689.784	1395.27	174.458	734.168	1375.68	99.9012	727.253	1360.79	247.798	802.681	1170.54	9.262	776.274	1190.45	329.53	701.529	1152.7	154.89	803.857	860.167	-163.949	518.855	885.804	-144.754	533.349	898.989	-61.2516	437.698	905.225	-77.4089	345.326	881.154	-70.4688	768.494	851.937	487.017	484.213	868.097	499.376	487.907	887.427	417.3	399.755	924.625	435.307	304.285	884.894	413.529
82	0.81	689.782	1395.22	174.343	734.203	1375.67	99.8032	727.193	1360.79	247.738	802.724	1170.55	9.24768	776.323	1190.44	329.512	701.595	1152.69	154.858	803.884	860.228	-163.892	518.851	885.808	-144.761	533.343	898.976	-61.2541	437.718	905.235	-77.4392	345.321	881.147	-70.4724	768.513	851.96	487.001	484.183	868.095	499.371	487.498	888.042	416.762	399.74	924.635	435.264	304.298	884.887	413.522
83	0.82	689.842	1395.12	174.197	734.177	1375.62	99.7329	727.212	1360.78	247.676	802.787	1170.53	9.21598	776.369	1190.42	329.494	701.603	1152.66	154.81	803.908	860.249	-163.881	518.871	885.805	-144.786	533.367	898.97	-61.2841	437.736	905.223	-77.4353	345.357	881.145	-70.5103	768.541	851.958	487.001	484.14	868.078	499.369	487.397	888.189	416.635	399.674	924.639	435.246	304.303	884.869	413.509
84	0.83	689.951	1394.99	174.114	734.134	1375.57	99.7018	727.162	1360.75	247.632	802.831	1170.53	9.20637	776.396	1190.41	329.478	701.655	1152.63	154.802	803.908	860.247	-163.875	518.872	885.814	-144.793	533.342	898.999	-61.2755	437.72	905.221	-77.4324	345.344	881.155	-70.5129	768.539	851.951	487.019	484.2	868.093	499.373	487.615	887.94	416.859	399.704	924.636	435.255	304.313	884.865	413.5
85	0.84	689.921	1394.93	174.064	734.094	1375.54	99.6739	727.133	1360.72	247.616	802.853	1170.54	9.21745	776.448	1190.43	329.482	701.633	1152.64	154.805	803.85	860.113	-163.988	518.81	885.857	-144.761	533.378	899.031	-61.277	437.69	905.248	-77.406	345.287	881.179	-70.4699	768.528	851.933	487.029	484.207	868.054	499.375	488.038	887.296	417.398	399.829	924.539	435.286	304.315	884.847	413.514
86	0.85	689.908	1394.87	174.022	734.08	1375.53	99.6453	727.148	1360.7	247.589	802.911	1170.54	9.21743	776.472	1190.44	329.484	701.649	1152.65	154.777	803.792	859.966	-164.11	518.802	885.875	-144.731	533.416	899.038	-61.2741	437.687	905.269	-77.3825	345.266	881.187	-70.4428	768.556	851.938	487.042	484.228	868.038	499.377	487.964	887.427	417.306	400.002	924.437	435.288	304.36	884.826	413.53
87	0.86	689.904	1394.83	174.026	734.08	1375.51	99.609	727.165	1360.69	247.554	802.972	1170.51	9.19167	776.511	1190.44	329.472	701.648	1152.66	154.772	803.908	860.119	-163.897	518.837	885.86	-144.741	533.432	899.036	-61.2762	437.7	905.259	-77.395	345.286	881.171	-70.4601	768.595	851.955	487.055	484.28	868.039	499.379	487.594	888.019	416.789	400.129	924.35	435.281	304.4	884.808	413.538
88	0.87	689.84	1394.87	174.036	734.082	1375.53	99.5832	727.168	1360.67	247.529	802.99	1170.48	9.15923	776.556	1190.44	329.452	701.671	1152.66	154.77	803.92	860.134	-163.851	518.866	885.826	-144.769	533.433	899.016	-61.28	437.705	905.235	-77.4069	345.317	881.165	-70.4748	768.593	851.973	487.064	484.304	868.061	499.38	487.736	887.88	416.914	400.105	924.35	435.306	304.44	884.8	413.537
89	0.88	689.819	1394.92	174.015	734.122	1375.54	99.5326	727.182	1360.67	247.51	802.967	1170.45	9.11954	776.581	1190.45	329.423	701.745	1152.66	154.754	803.889	860.111	-163.859	518.88	885.79	-144.783	533.389	898.995	-61.2819	437.727	905.23	-77.4243	345.347	881.154	-70.5066	768.574	851.987	487.058	484.329	868.101	499.386	487.963	887.574	417.22	400.096	924.396	435.323	304.455	884.802	413.524
90	0.89	689.892	1394.9	173.991	734.124	1375.53	99.4931	727.223	1360.69	247.49	802.956	1170.41	9.07627	776.577	1190.46	329.377	701.736	1152.66	154.742	803.915	860.094	-163.834	518.924	885.763	-144.823	533.363	898.983	-61.3045	437.794	905.23	-77.4528	345.4	881.142	-70.5454	768.567	852.021	487.041	484.362	868.139	499.387	487.643	888.075	416.755	400.063	924.455	435.284	304.444	884.823	413.523
91	0.9	689.921	1394.92	173.925	734.167	1375.51	99.4648	727.206	1360.7	247.439	802.956	1170.41	9.04544	776.592	1190.47	329.356	701.712	1152.63	154.702	803.935	860.09	-163.824	518.959	885.731	-144.827	533.399	898.957	-61.3206	437.806	905.217	-77.4555	345.432	881.116	-70.5493	768.576	852.088	487.043	484.361	868.169	499.392	487.551	888.212	416.617	399.968	924.52	435.239	304.383	884.858	413.513
92	0.91	689.912	1394.94	173.892	734.216	1375.5	99.4321	727.187	1360.73	247.404	802.948	1170.4	9.03229	776.587	1190.5	329.346	701.692	1152.62	154.705	803.949	860.076	-163.802	518.933	885.726	-144.805	533.399	898.951	-61.3184	437.761	905.211	-77.4568	345.414	881.128	-70.5368	768.564	852.137	487.047	484.314	868.202	499.396	487.502	888.254	416.586	399.919	924.538	435.233	304.324	884.881	413.51
93	0.92	689.923	1394.94	173.907	734.207	1375.5	99.4007	727.194	1360.76	247.386	802.931	1170.4	9.03926	776.577	1190.53	329.348	701.698	1152.62	154.748	803.909	860.031	-163.83	518.931	885.728	-144.778	533.423	898.974	-61.3149	437.726	905.232	-77.4496	345.397	881.14	-70.5123	768.538	852.154	487.028	484.309	868.196	499.392	487.48	888.293	416.607	399.815	924.589	435.277	304.33	884.89	413.518
94	0.93	689.923	1394.9	173.889	734.207	1375.5	99.3765	727.238	1360.77	247.358	802.907	1170.4	9.04629	776.59	1190.54	329.344	701.746	1152.6	154.736	803.901	860.009	-163.852	518.928	885.719	-144.753	533.426	898.966	-61.2966	437.715	905.228	-77.4303	345.37	881.143	-70.4999	768.524	852.151	487.024	484.29	868.182	499.396	487.477	888.295	416.612	399.893	924.559	435.279	304.349	884.893	413.523
95	0.94	689.929	1394.93	173.82	734.235	1375.48	99.3403	727.278	1360.78	247.322	802.876	1170.38	9.03432	776.584	1190.52	329.341	701.702	1152.6	154.724	803.903	859.982	-163.844	518.939	885.7	-144.753	533.408	898.951	-61.2908	437.734	905.218	-77.4247	345.385	881.125	-70.4966	768.536	852.151	487.032	484.26	868.138	499.369	487.443	888.279	416.6	399.943	924.51	435.255	304.342	884.874	413.513
96	0.95	690.003	1395.01	173.768	734.221	1375.47	99.3327	727.332	1360.81	247.293	802.872	1170.37	9.03466	776.562	1190.49	329.32	701.656	1152.62	154.726	803.896	859.96	-163.827	518.927	885.698	-144.762	533.436	898.943	-61.3068	437.709	905.218	-77.3896	345.395	881.129	-70.4803	768.538	852.113	487.037	484.294	868.153	499.37	487.426	888.258	416.588	399.993	924.476	435.273	304.364	884.858	413.516
97	0.96	690.05	1395.04	173.738	734.349	1375.48	99.2686	727.4	1360.83	247.259	802.896	1170.36	9.02172	776.573	1190.47	329.308	701.738	1152.59	154.713	803.902	859.956	-163.822	518.958	885.681	-144.766	533.414	898.931	-61.2934	437.746	905.211	-77.3779	345.354	881.127	-70.4671	768.548	852.078	487.031	484.31	868.156	499.4	487.516	888.225	416.62	400.084	924.442	435.287	304.403	884.835	413.54
98	0.97	690.006	1395.11	173.705	734.395	1375.5	99.236	727.455	1360.83	247.206	802.889	1170.35	8.99546	776.564	1190.46	329.309	701.78	1152.58	154.677	803.877	859.951	-163.838	518.924	885.687	-144.767	533.352	898.918	-61.262	437.728	905.228	-77.3905	345.326	881.142	-70.4797	768.572	852.046	487.017	484.358	868.148	499.393	487.54	888.2	416.642	400.108	924.415	435.291	304.421	884.816	413.538
99	0.98	690.042	1395.15	173.625	734.411	1375.53	99.1906	727.422	1360.85	247.155	802.848	1170.36	8.99246	776.545	1190.46	329.305	701.72	1152.58	154.657	803.9	859.985	-163.837	518.877	885.711	-144.789	533.337	898.938	-61.2808	437.707	905.246	-77.4218	345.33	881.135	-70.4958	768.59	852.039	486.997	484.355	868.141	499.365	487.477	888.188	416.603	400.104	924.392	435.301	304.417	884.812	413.53
100	0.99	690.076	1395.21	173.559	734.487	1375.53	99.1171	727.391	1360.9	247.094	802.847	1170.37	8.98111	776.531	1190.45	329.288	701.69	1152.59	154.651	803.914	860.009	-163.839	518.847	885.736	-144.81	533.338	898.963	-61.2995	437.693	905.249	-77.4281	345.318	881.148	-70.4986	768.588	852.044	486.975	484.36	868.157	499.365	487.447	888.199	416.574	400.098	924.418	435.295	304.397	884.815	413.514
101	1	690.16	1395.25	173.502	734.562	1375.54	99.0843	727.417	1360.95	247.066	802.825	1170.38	8.98611	776.528	1190.46	329.283	701.649	1152.59	154.651	803.904	860.023	-163.862	518.852	885.754	-144.803	533.354	898.983	-61.3174	437.692	905.249	-77.431	345.289	881.163	-70.4899	768.603	852.067	486.943	484.366	868.161	499.377	487.448	888.212	416.553	400.151	924.401	435.268	304.383	884.834	413.522
102	1.01	690.129	1395.34	173.5	734.598	1375.55	99.0909	727.347	1361.01	247.037	802.793	1170.42	9.00486	776.505	1190.48	329.281	701.605	1152.6	154.65	803.885	860.041	-163.902	518.838	885.789	-144.78	533.348	899.009	-61.298	437.657	905.262	-77.4087	345.249	881.194	-70.4695	768.607	852.092	486.926	484.329	868.154	499.374	487.439	888.248	416.565	399.984	924.506	435.239	304.341	884.855	413.531
103	1.02	690.122	1395.39	173.488	734.577	1375.56	99.1027	727.31	1361.06	247.019	802.764	1170.46	9.00718	776.467	1190.49	329.284	701.512	1152.64	154.67	803.843	860.052	-163.93	518.805	885.823	-144.759	533.368	899.046	-61.2923	437.645	905.279	-77.4153	345.202	881.22	-70.4413	768.594	852.117	486.913	484.28	868.155	499.37	487.601	888.012	416.808	399.844	924.578	435.252	304.3	884.878	413.535
104	1.03	690.173	1395.39	173.463	734.617	1375.6	99.0873	727.334	1361.08	247.029	802.772	1170.46	8.9987	776.481	1190.49	329.298	701.531	1152.66	154.686	803.845	860.071	-163.955	518.823	885.817	-144.764	533.365	899.054	-61.2939	437.693	905.281	-77.4172	345.234	881.219	-70.4434	768.614	852.129	486.903	484.261	868.164	499.378	487.808	887.666	417.119	399.838	924.553	435.258	304.32	884.898	413.529
105	1.04	690.38	1395.41	173.453	734.663	1375.6	99.0894	727.382	1361.09	247.036	802.789	1170.44	8.9972	776.496	1190.5	329.292	701.62	1152.63	154.683	803.81	860.09	-163.988	518.846	885.798	-144.782	533.385	899.037	-61.3054	437.707	905.267	-77.4226	345.276	881.19	-70.4636	768.642	852.123	486.873	484.261	868.158	499.348	487.525	888.129	416.721	399.926	924.523	435.274	304.359	884.897	413.53
106	1.05	690.503	1395.41	173.429	734.683	1375.59	99.0967	727.433	1361.08	247.031	802.787	1170.42	8.97434	776.481	1190.48	329.277	701.654	1152.61	154.657	803.787	860.091	-164	518.858	885.771	-144.801	533.368	899.006	-61.3066	437.692	905.246	-77.4208	345.28	881.159	-70.4692	768.61	852.08	486.842	484.283	868.171	499.357	487.433	888.224	416.623	399.988	924.508	435.266	304.359	884.879	413.525
107	1.06	690.346	1395.46	173.468	734.724	1375.6	99.0859	727.493	1361.05	247.047	802.778	1170.37	8.94742	776.46	1190.44	329.252	701.679	1152.58	154.635	803.779	860.093	-163.989	518.827	885.749	-144.817	533.36	898.972	-61.3328	437.708	905.198	-77.4523	345.29	881.125	-70.4918	768.572	852.023	486.839	484.34	868.15	499.364	487.636	887.935	416.846	400.05	924.446	435.303	304.366	884.842	413.525
108	1.07	690.394	1395.47	173.52	734.761	1375.59	99.0847	727.575	1361.02	247.067	802.802	1170.35	8.93628	776.488	1190.42	329.244	701.716	1152.55	154.639	803.758	860.042	-164.014	518.86	885.715	-144.832	533.353	898.929	-61.3266	437.71	905.179	-77.4753	345.384	881.079	-70.5424	768.593	851.988	486.836	484.366	868.108	499.346	488	887.538	417.147	400.089	924.374	435.344	304.432	884.805	413.513
109	1.08	690.485	1395.43	173.554	734.719	1375.61	99.1565	727.608	1360.99	247.097	802.84	1170.34	8.94976	776.504	1190.4	329.243	701.69	1152.54	154.658	803.777	860.033	-164.032	518.871	885.729	-144.817	533.399	898.927	-61.327	437.718	905.201	-77.4623	345.37	881.093	-70.5244	768.63	851.989	486.806	484.406	868.102	499.353	487.687	888.006	416.745	400.125	924.374	435.325	304.47	884.797	413.515
110	1.09	690.401	1395.44	173.585	734.678	1375.61	99.2137	727.605	1360.98	247.124	802.841	1170.35	8.97744	776.508	1190.42	329.258	701.605	1152.6	154.67	803.8	860.036	-164.027	518.834	885.75	-144.799	533.392	898.954	-61.3272	437.651	905.212	-77.4327	345.312	881.117	-70.4976	768.646	852.007	486.819	484.386	868.077	499.347	487.543	888.143	416.631	400.12	924.354	435.296	304.422	884.796	413.513
111	1.1	690.25	1395.5	173.607	734.63	1375.64	99.2395	727.584	1360.99	247.121	802.824	1170.39	8.99209	776.506	1190.44	329.273	701.621	1152.64	154.655	803.775	860.036	-164.026	518.806	885.798	-144.804	533.401	899.004	-61.3433	437.603	905.226	-77.4119	345.256	881.154	-70.469	768.626	852.001	486.84	484.359	868.087	499.329	487.713	887.916	416.853	400	924.414	435.276	304.386	884.812	413.519
112	1.11	690.26	1395.47	173.642	734.609	1375.64	99.2644	727.593	1360.99	247.146	802.837	1170.43	9.00223	776.522	1190.47	329.29	701.611	1152.69	154.684	803.791	860.044	-163.994	518.807	885.839	-144.795	533.417	899.039	-61.3378	437.644	905.25	-77.4085	345.241	881.181	-70.4561	768.621	852.01	486.847	484.354	868.126	499.321	487.93	887.614	417.18	399.958	924.479	435.263	304.375	884.85	413.52
113	1.12	690.424	1395.4	173.655	734.649	1375.66	99.2726	727.617	1361.01	247.168	802.855	1170.44	9.01611	776.532	1190.49	329.301	701.578	1152.72	154.723	803.846	860.077	-163.957	518.808	885.839	-144.775	533.417	899.055	-61.3227	437.663	905.258	-77.4118	345.253	881.204	-70.4493	768.64	852.056	486.858	484.363	868.157	499.341	487.595	888.118	416.76	399.922	924.534	435.273	304.366	884.883	413.526
114	1.13	690.453	1395.4	173.685	734.57	1375.68	99.3322	727.6	1361.01	247.183	802.858	1170.43	9.02268	776.507	1190.48	329.295	701.6	1152.71	154.725	803.831	860.094	-163.935	518.798	885.828	-144.769	533.408	899.054	-61.3216	437.655	905.271	-77.4103	345.256	881.199	-70.4487	768.628	852.079	486.862	484.296	868.167	499.348	487.676	887.969	416.887	399.883	924.545	435.289	304.324	884.906	413.521
115	1.14	690.377	1395.34	173.715	734.559	1375.67	99.3358	727.607	1360.98	247.21	802.852	1170.41	9.00683	776.51	1190.45	329.286	701.68	1152.65	154.686	803.822	860.075	-163.928	518.819	885.798	-144.806	533.37	899.026	-61.3208	437.67	905.246	-77.4268	345.298	881.154	-70.504	768.594	852.065	486.888	484.242	868.151	499.346	487.83	887.635	417.135	399.813	924.567	435.27	304.298	884.904	413.499
116	1.15	690.443	1395.29	173.722	734.604	1375.64	99.3286	727.662	1360.95	247.244	802.882	1170.38	9.00192	776.537	1190.42	329.277	701.744	1152.58	154.695	803.853	860.081	-163.915	518.842	885.752	-144.8	533.305	898.992	-61.2865	437.716	905.224	-77.4362	345.349	881.126	-70.5307	768.6	852.058	486.89	484.243	868.12	499.344	487.706	887.821	416.949	399.844	924.553	435.252	304.337	884.878	413.497
117	1.16	690.454	1395.25	173.711	734.648	1375.62	99.3487	727.645	1360.93	247.236	802.895	1170.37	9.014	776.553	1190.39	329.286	701.788	1152.57	154.698	803.882	860.067	-163.901	518.853	885.738	-144.79	533.286	898.954	-61.2488	437.698	905.22	-77.4232	345.348	881.114	-70.5075	768.625	852.03	486.888	484.273	868.089	499.367	488.063	887.294	417.407	399.862	924.522	435.284	304.34	884.85	413.507
118	1.17	690.377	1395.22	173.718	734.599	1375.62	99.3503	727.612	1360.91	247.254	802.872	1170.38	9.02882	776.576	1190.38	329.304	701.765	1152.6	154.703	803.883	860.038	-163.905	518.834	885.747	-144.777	533.311	898.965	-61.2614	437.672	905.223	-77.4315	345.291	881.14	-70.4866	768.605	851.976	486.898	484.278	868.068	499.39	488.192	887.161	417.553	399.897	924.485	435.324	304.349	884.835	413.51
119	1.18	690.218	1395.22	173.743	734.565	1375.59	99.3602	727.588	1360.9	247.291	802.879	1170.39	9.05414	776.571	1190.4	329.334	701.679	1152.64	154.738	803.863	860.037	-163.891	518.798	885.784	-144.767	533.328	899.012	-61.2853	437.645	905.245	-77.4293	345.239	881.167	-70.476	768.586	851.945	486.921	484.274	868.061	499.378	488.046	887.403	417.356	400.005	924.448	435.298	304.383	884.838	413.51
120	1.19	690.19	1395.22	173.767	734.607	1375.58	99.397	727.614	1360.9	247.314	802.901	1170.39	9.09125	776.59	1190.4	329.364	701.698	1152.66	154.792	803.89	860.05	-163.838	518.812	885.802	-144.739	533.339	899.036	-61.2788	437.668	905.265	-77.3993	345.222	881.176	-70.4424	768.622	851.929	486.939	484.306	868.066	499.385	487.814	887.711	417.06	400.073	924.404	435.289	304.412	884.831	413.541
121	1.2	690.174	1395.22	173.769	734.668	1375.59	99.3984	727.652	1360.89	247.335	802.948	1170.4	9.11726	776.625	1190.4	329.385	701.763	1152.66	154.821	803.868	860.048	-163.814	518.859	885.793	-144.738	533.401	899.038	-61.2749	437.705	905.258	-77.4053	345.246	881.152	-70.4462	768.631	851.908	486.933	484.377	868.103	499.374	487.932	887.515	417.258	400.072	924.414	435.346	304.462	884.829	413.551
122	1.21	690.294	1395.19	173.745	734.661	1375.58	99.3909	727.637	1360.89	247.34	802.944	1170.38	9.1194	776.629	1190.37	329.376	701.79	1152.63	154.795	803.84	860.06	-163.839	518.857	885.789	-144.775	533.419	899.027	-61.2945	437.727	905.235	-77.4442	345.273	881.14	-70.4813	768.612	851.874	486.913	484.384	868.128	499.372	487.802	887.755	417.024	400.018	924.454	435.322	304.458	884.843	413.541
123	1.22	690.274	1395.17	173.729	734.635	1375.57	99.3766	727.595	1360.9	247.33	802.935	1170.36	9.09805	776.632	1190.35	329.38	701.777	1152.62	154.794	803.845	860.078	-163.862	518.875	885.765	-144.793	533.398	898.994	-61.3081	437.677	905.225	-77.4504	345.3	881.144	-70.5189	768.618	851.86	486.895	484.349	868.116	499.358	488.137	887.232	417.431	400.05	924.423	435.274	304.423	884.862	413.533
124	1.23	690.243	1395.13	173.759	734.679	1375.53	99.3975	727.572	1360.89	247.333	802.949	1170.38	9.10733	776.637	1190.33	329.38	701.789	1152.6	154.811	803.852	860.096	-163.879	518.886	885.741	-144.787	533.393	898.982	-61.2861	437.656	905.212	-77.4358	345.324	881.124	-70.5082	768.623	851.828	486.87	484.352	868.122	499.348	487.96	887.384	417.265	400.014	924.463	435.245	304.397	884.882	413.523
125	1.24	690.359	1395.1	173.766	734.713	1375.51	99.4153	727.572	1360.88	247.333	802.98	1170.39	9.13333	776.658	1190.31	329.389	701.854	1152.58	154.831	803.884	860.103	-163.879	518.89	885.734	-144.776	533.405	898.983	-61.2895	437.732	905.22	-77.4577	345.348	881.104	-70.5021	768.618	851.798	486.87	484.375	868.147	499.357	487.611	888.003	416.752	399.886	924.549	435.282	304.38	884.888	413.512
126	1.25	690.263	1395.1	173.806	734.58	1375.53	99.4627	727.505	1360.88	247.339	802.958	1170.41	9.15523	776.661	1190.31	329.399	701.886	1152.57	154.846	803.89	860.112	-163.887	518.878	885.764	-144.782	533.407	899.018	-61.301	437.749	905.21	-77.4654	345.303	881.124	-70.5039	768.623	851.794	486.863	484.337	868.138	499.365	487.659	887.867	416.883	399.865	924.567	435.288	304.36	884.883	413.513
127	1.26	690.215	1395.07	173.844	734.552	1375.52	99.4798	727.472	1360.88	247.361	802.936	1170.41	9.16757	776.66	1190.31	329.407	701.803	1152.61	154.863	803.855	860.115	-163.903	518.844	885.801	-144.778	533.325	899.028	-61.2742	437.72	905.194	-77.4854	345.257	881.142	-70.4918	768.604	851.763	486.833	484.288	868.105	499.351	487.811	887.565	417.152	399.83	924.552	435.282	304.346	884.88	413.526
128	1.27	690.311	1394.99	173.89	734.558	1375.5	99.5487	727.516	1360.87	247.402	802.964	1170.41	9.19515	776.681	1190.31	329.435	701.76	1152.64	154.915	803.834	860.11	-163.895	518.858	885.79	-144.747	533.337	899.037	-61.2438	437.707	905.206	-77.4514	345.284	881.143	-70.4795	768.593	851.718	486.804	484.308	868.086	499.353	487.57	888.057	416.749	399.984	924.47	435.297	304.401	884.879	413.525
129	1.28	690.367	1394.91	173.927	734.554	1375.5	99.6532	727.565	1360.84	247.433	803.007	1170.41	9.21673	776.71	1190.31	329.46	701.836	1152.61	154.93	803.876	860.137	-163.868	518.857	885.809	-144.733	533.391	899.051	-61.2426	437.709	905.197	-77.4321	345.28	881.16	-70.4651	768.649	851.722	486.811	484.308	868.062	499.36	487.566	888.173	416.649	400.125	924.45	435.292	304.45	884.88	413.54
130	1.29	690.363	1394.9	173.968	734.553	1375.51	99.665	727.569	1360.83	247.47	803	1170.41	9.21372	776.719	1190.29	329.455	701.856	1152.57	154.932	803.843	860.132	-163.89	518.815	885.825	-144.739	533.356	899.04	-61.261	437.65	905.214	-77.4178	345.231	881.162	-70.4674	768.67	851.719	486.808	484.29	868.027	499.364	487.737	887.908	416.878	400.173	924.427	435.314	304.462	884.844	413.538
131	1.3	690.332	1394.91	173.989	734.525	1375.52	99.6669	727.579	1360.8	247.467	802.966	1170.4	9.19172	776.697	1190.28	329.455	701.824	1152.58	154.915	803.83	860.13	-163.89	518.799	885.821	-144.76	533.304	899.025	-61.2658	437.613	905.236	-77.4216	345.244	881.153	-70.4958	768.636	851.713	486.812	484.267	868.03	499.364	487.971	887.555	417.171	400.061	924.433	435.307	304.457	884.833	413.537
132	1.31	690.369	1394.9	173.995	734.472	1375.54	99.7201	727.606	1360.79	247.487	802.956	1170.39	9.18773	776.7	1190.28	329.448	701.855	1152.58	154.902	803.856	860.142	-163.878	518.799	885.805	-144.769	533.306	899.023	-61.2713	437.647	905.22	-77.4378	345.281	881.142	-70.5034	768.659	851.72	486.827	484.297	868.05	499.354	487.839	887.741	416.975	400.131	924.389	435.33	304.472	884.833	413.521
133	1.32	690.44	1394.88	174.016	734.441	1375.58	99.7513	727.601	1360.78	247.492	802.926	1170.39	9.18551	776.702	1190.27	329.447	701.826	1152.62	154.928	803.877	860.13	-163.86	518.803	885.8	-144.767	533.312	899.036	-61.273	437.679	905.208	-77.4419	345.315	881.135	-70.5089	768.667	851.723	486.832	484.318	868.069	499.355	488.165	887.232	417.448	400.156	924.409	435.303	304.466	884.837	413.525
134	1.33	690.377	1394.87	174.027	734.451	1375.58	99.728	727.562	1360.8	247.478	802.883	1170.39	9.16611	776.679	1190.28	329.451	701.781	1152.68	154.905	803.859	860.122	-163.851	518.772	885.817	-144.764	533.278	899.054	-61.2673	437.644	905.219	-77.4498	345.246	881.16	-70.5002	768.672	851.751	486.852	484.332	868.094	499.361	488.039	887.388	417.312	400.016	924.486	435.259	304.452	884.856	413.523
135	1.34	690.28	1394.87	174.044	734.432	1375.59	99.7103	727.539	1360.8	247.476	802.851	1170.4	9.14765	776.679	1190.29	329.421	701.749	1152.69	154.872	803.867	860.125	-163.851	518.777	885.83	-144.786	533.288	899.06	-61.277	437.632	905.23	-77.4597	345.209	881.167	-70.487	768.646	851.761	486.867	484.318	868.085	499.36	487.79	887.723	417.033	399.9	924.537	435.268	304.408	884.867	413.523
136	1.35	690.277	1394.86	174.085	734.442	1375.6	99.7411	727.58	1360.8	247.504	802.842	1170.41	9.15791	776.693	1190.32	329.424	701.77	1152.67	154.898	803.871	860.129	-163.849	518.823	885.813	-144.783	533.342	899.075	-61.2835	437.62	905.233	-77.4415	345.252	881.16	-70.4845	768.625	851.775	486.854	484.311	868.11	499.364	487.908	887.535	417.211	399.936	924.549	435.29	304.382	884.879	413.545
137	1.36	690.426	1394.85	174.103	734.459	1375.59	99.7659	727.647	1360.81	247.527	802.831	1170.42	9.17991	776.701	1190.35	329.452	701.818	1152.67	154.93	803.89	860.135	-163.838	518.845	885.797	-144.726	533.362	899.092	-61.2503	437.618	905.237	-77.3963	345.251	881.188	-70.4427	768.638	851.793	486.849	484.33	868.146	499.369	487.567	888.079	416.777	399.937	924.574	435.291	304.382	884.898	413.562
138	1.37	690.517	1394.83	174.072	734.46	1375.56	99.7821	727.655	1360.83	247.536	802.803	1170.41	9.17597	776.67	1190.36	329.454	701.79	1152.69	154.949	803.843	860.108	-163.834	518.833	885.795	-144.713	533.321	899.088	-61.2249	437.628	905.239	-77.3795	345.215	881.189	-70.4294	768.643	851.802	486.868	484.301	868.119	499.383	487.673	887.949	416.909	399.864	924.599	435.316	304.383	884.911	413.56
139	1.38	690.532	1394.84	174.018	734.482	1375.56	99.7333	727.671	1360.84	247.518	802.794	1170.38	9.14087	776.638	1190.35	329.426	701.804	1152.65	154.907	803.834	860.087	-163.842	518.844	885.767	-144.761	533.324	899.049	-61.2668	437.629	905.216	-77.4205	345.255	881.141	-70.4852	768.626	851.785	486.875	484.29	868.085	499.394	487.886	887.607	417.171	399.807	924.649	435.287	304.369	884.902	413.534
140	1.39	690.575	1394.87	173.99	734.502	1375.57	99.7044	727.673	1360.83	247.488	802.798	1170.34	9.10682	776.62	1190.32	329.406	701.842	1152.62	154.887	803.793	860.058	-163.86	518.868	885.749	-144.786	533.353	899.023	-61.2964	437.688	905.186	-77.4592	345.3	881.1	-70.5142	768.617	851.772	486.874	484.296	868.063	499.377	487.793	887.772	416.986	399.901	924.584	435.3	304.394	884.891	413.517
141	1.4	690.525	1394.93	173.998	734.547	1375.57	99.6772	727.697	1360.84	247.479	802.776	1170.32	9.10681	776.613	1190.32	329.423	701.822	1152.6	154.892	803.77	860.043	-163.846	518.853	885.744	-144.766	533.293	898.997	-61.2541	437.707	905.162	-77.4581	345.304	881.077	-70.4865	768.615	851.784	486.875	484.289	868.035	499.384	488.119	887.248	417.427	400	924.49	435.328	304.4	884.87	413.53
142	1.41	690.51	1394.9	173.957	734.53	1375.57	99.6087	727.715	1360.83	247.449	802.732	1170.3	9.11667	776.583	1190.31	329.425	701.716	1152.61	154.917	803.787	860.034	-163.837	518.826	885.745	-144.768	533.257	898.988	-61.2503	437.64	905.167	-77.4557	345.311	881.074	-70.4985	768.59	851.762	486.879	484.323	868.039	499.395	488.242	887.109	417.566	400.055	924.456	435.308	304.42	884.836	413.544
143	1.42	690.495	1394.85	173.889	734.532	1375.56	99.522	727.714	1360.84	247.39	802.725	1170.29	9.10249	776.557	1190.3	329.4	701.681	1152.62	154.882	803.816	860.028	-163.862	518.828	885.737	-144.786	533.274	898.982	-61.2878	437.632	905.177	-77.4436	345.289	881.089	-70.5374	768.571	851.723	486.873	484.312	868.04	499.368	488.279	887.028	417.596	400.125	924.389	435.285	304.452	884.821	413.526
144	1.43	690.451	1394.9	173.852	734.535	1375.56	99.4928	727.716	1360.87	247.35	802.747	1170.31	9.10851	776.575	1190.31	329.399	701.691	1152.61	154.891	803.805	860.026	-163.88	518.827	885.733	-144.787	533.289	898.99	-61.3025	437.65	905.168	-77.4464	345.276	881.093	-70.5218	768.599	851.732	486.867	484.373	868.043	499.345	488.093	887.288	417.353	400.107	924.384	435.296	304.444	884.824	413.511
145	1.44	690.467	1394.92	173.807	734.508	1375.56	99.4791	727.756	1360.91	247.348	802.76	1170.35	9.14252	776.604	1190.32	329.42	701.736	1152.62	154.899	803.812	860.038	-163.883	518.826	885.767	-144.742	533.337	899.039	-61.2701	437.646	905.176	-77.4458	345.27	881.105	-70.4699	768.636	851.734	486.852	484.39	868.061	499.355	487.862	887.671	417.025	400.204	924.372	435.337	304.456	884.836	413.54
146	1.45	690.386	1394.98	173.78	734.574	1375.54	99.4273	727.717	1360.95	247.326	802.745	1170.39	9.16205	776.609	1190.34	329.43	701.726	1152.66	154.9	803.836	860.072	-163.865	518.777	885.836	-144.731	533.345	899.103	-61.2538	437.667	905.226	-77.4451	345.215	881.164	-70.454	768.631	851.743	486.844	484.332	868.065	499.358	487.948	887.534	417.218	400.153	924.413	435.314	304.44	884.872	413.556
147	1.46	690.397	1395.01	173.706	734.578	1375.54	99.3789	727.63	1361	247.268	802.737	1170.43	9.15432	776.591	1190.36	329.423	701.646	1152.72	154.878	803.832	860.122	-163.876	518.723	885.883	-144.749	533.318	899.135	-61.2518	437.63	905.246	-77.4456	345.182	881.203	-70.4488	768.608	851.75	486.833	484.314	868.115	499.344	487.763	887.797	417.021	399.868	924.597	435.285	304.398	884.893	413.563
148	1.47	690.344	1395.05	173.628	734.686	1375.54	99.3042	727.602	1361.02	247.214	802.779	1170.45	9.13121	776.6	1190.35	329.405	701.686	1152.7	154.87	803.82	860.162	-163.89	518.722	885.898	-144.767	533.299	899.151	-61.2815	437.641	905.248	-77.4491	345.188	881.183	-70.4485	768.634	851.79	486.818	484.311	868.138	499.345	487.85	887.582	417.185	399.714	924.679	435.298	304.358	884.907	413.543
149	1.48	690.456	1395.01	173.581	734.712	1375.52	99.2913	727.583	1361.02	247.17	802.802	1170.44	9.13309	776.6	1190.33	329.392	701.833	1152.64	154.851	803.828	860.182	-163.903	518.729	885.889	-144.759	533.332	899.123	-61.2962	437.633	905.246	-77.4545	345.227	881.145	-70.4678	768.684	851.822	486.796	484.301	868.138	499.38	487.491	888.085	416.707	399.651	924.694	435.301	304.352	884.912	413.528
150	1.49	690.52	1394.97	173.572	734.657	1375.5	99.2738	727.589	1361	247.141	802.808	1170.43	9.13511	776.599	1190.33	329.381	701.862	1152.61	154.852	803.796	860.182	-163.933	518.721	885.87	-144.766	533.297	899.108	-61.2677	437.586	905.235	-77.4364	345.193	881.138	-70.4792	768.698	851.812	486.786	484.29	868.107	499.388	487.61	887.915	416.865	399.716	924.633	435.294	304.37	884.885	413.529
151	1.5	690.468	1394.93	173.582	734.668	1375.49	99.2402	727.594	1360.97	247.121	802.815	1170.41	9.11148	776.586	1190.32	329.367	701.767	1152.63	154.854	803.759	860.161	-163.954	518.687	885.844	-144.774	533.221	899.102	-61.2314	437.543	905.226	-77.424	345.165	881.168	-70.4719	768.66	851.783	486.758	484.275	868.077	499.353	488.004	887.293	417.386	399.809	924.568	435.3	304.352	884.874	413.531
152	1.51	690.49	1394.86	173.579	734.688	1375.47	99.2422	727.662	1360.92	247.116	802.881	1170.39	9.10374	776.606	1190.28	329.36	701.85	1152.59	154.86	803.778	860.15	-163.957	518.721	885.827	-144.773	533.246	899.073	-61.2487	437.555	905.214	-77.4246	345.183	881.155	-70.4607	768.642	851.743	486.723	484.276	868.038	499.335	488.175	887.097	417.504	399.912	924.509	435.308	304.403	884.86	413.535
153	1.52	690.514	1394.82	173.584	734.715	1375.48	99.2494	727.733	1360.88	247.139	802.939	1170.37	9.10001	776.65	1190.26	329.365	701.951	1152.55	154.846	803.794	860.129	-163.95	518.791	885.809	-144.771	533.328	899.057	-61.2652	437.628	905.208	-77.4287	345.239	881.125	-70.4688	768.625	851.693	486.702	484.283	868.01	499.359	488.304	887.03	417.552	400.028	924.45	435.343	304.459	884.838	413.533
154	1.53	690.549	1394.8	173.58	734.745	1375.47	99.2601	727.77	1360.87	247.155	802.973	1170.37	9.09802	776.69	1190.26	329.362	701.941	1152.62	154.839	803.77	860.086	-163.959	518.79	885.825	-144.766	533.344	899.076	-61.271	437.665	905.216	-77.4268	345.238	881.143	-70.4639	768.65	851.675	486.708	484.31	868.023	499.359	488.321	887.012	417.579	400.118	924.405	435.317	304.475	884.836	413.541
155	1.54	690.556	1394.84	173.578	734.82	1375.46	99.2418	727.776	1360.87	247.15	802.981	1170.39	9.0694	776.709	1190.29	329.344	701.818	1152.7	154.815	803.752	860.045	-163.969	518.746	885.862	-144.776	533.311	899.135	-61.2859	437.614	905.237	-77.4498	345.237	881.159	-70.4955	768.669	851.682	486.686	484.36	868.039	499.348	488.149	887.336	417.333	400.14	924.424	435.294	304.47	884.843	413.537
156	1.55	690.558	1394.87	173.568	734.862	1375.49	99.2219	727.797	1360.86	247.141	802.999	1170.41	9.03111	776.731	1190.31	329.326	701.837	1152.74	154.784	803.741	860.025	-163.983	518.777	885.858	-144.802	533.371	899.17	-61.3245	437.623	905.237	-77.4636	345.234	881.161	-70.5029	768.676	851.689	486.654	484.366	868.103	499.324	487.7	888.026	416.776	400.151	924.45	435.274	304.485	884.865	413.526
157	1.56	690.43	1394.92	173.598	734.874	1375.52	99.2342	727.839	1360.83	247.152	803.02	1170.42	9.02524	776.746	1190.32	329.308	701.888	1152.76	154.769	803.72	860.016	-163.988	518.792	885.859	-144.809	533.422	899.16	-61.3607	437.633	905.24	-77.4577	345.23	881.173	-70.4893	768.675	851.704	486.654	484.366	868.132	499.333	487.564	888.227	416.648	400.113	924.443	435.24	304.451	884.893	413.532
158	1.57	690.395	1394.9	173.638	734.814	1375.51	99.2462	727.848	1360.84	247.154	803	1170.41	9.00004	776.736	1190.34	329.296	701.889	1152.76	154.767	803.731	860.017	-163.987	518.79	885.82	-144.81	533.411	899.122	-61.358	437.614	905.215	-77.4703	345.219	881.172	-70.4851	768.668	851.736	486.667	484.38	868.122	499.315	487.658	887.978	416.824	400.038	924.493	435.228	304.394	884.902	413.53
159	1.58	690.415	1394.87	173.663	734.747	1375.5	99.2499	727.886	1360.82	247.138	802.965	1170.38	8.9589	776.729	1190.32	329.26	701.863	1152.75	154.765	803.742	860.008	-163.994	518.783	885.789	-144.823	533.392	899.094	-61.3652	437.61	905.206	-77.4802	345.189	881.167	-70.4777	768.66	851.777	486.659	484.355	868.13	499.314	487.823	887.629	417.107	399.929	924.587	435.215	304.353	884.896	413.511
160	1.59	690.597	1394.77	173.657	734.74	1375.47	99.2505	727.978	1360.78	247.11	802.947	1170.34	8.91468	776.741	1190.29	329.234	701.91	1152.69	154.772	803.769	860.007	-164.011	518.808	885.753	-144.829	533.374	899.042	-61.3585	437.66	905.184	-77.5078	345.248	881.12	-70.4945	768.653	851.814	486.655	484.335	868.126	499.328	487.73	887.806	416.91	399.868	924.598	435.232	304.348	884.889	413.508
161	1.6	690.775	1394.73	173.692	734.781	1375.43	99.2504	728.079	1360.78	247.097	802.957	1170.3	8.91756	776.755	1190.29	329.238	701.942	1152.64	154.8	803.76	860.001	-164.002	518.827	885.717	-144.795	533.375	899.003	-61.3095	437.693	905.159	-77.5054	345.315	881.088	-70.5086	768.692	851.851	486.675	484.339	868.106	499.355	487.936	887.523	417.106	399.874	924.551	435.284	304.388	884.875	413.535
162	1.61	690.777	1394.78	173.726	734.77	1375.46	99.2798	728.163	1360.76	247.079	802.965	1170.27	8.92485	776.771	1190.3	329.233	701.982	1152.64	154.81	803.778	859.993	-163.986	518.827	885.721	-144.765	533.372	899.005	-61.2699	437.702	905.157	-77.4734	345.292	881.089	-70.4982	768.734	851.873	486.715	484.39	868.106	499.355	487.853	887.736	416.973	400.057	924.45	435.291	304.448	884.845	413.555
163	1.62	690.735	1394.83	173.697	734.745	1375.49	99.2564	728.249	1360.77	247.035	802.944	1170.28	8.90354	776.785	1190.33	329.22	701.972	1152.67	154.776	803.807	859.986	-163.982	518.785	885.752	-144.765	533.302	899.027	-61.2685	437.666	905.177	-77.4518	345.236	881.103	-70.487	768.747	851.886	486.703	484.457	868.121	499.326	488.218	887.212	417.42	400.14	924.405	435.278	304.504	884.818	413.53
164	1.63	690.767	1394.88	173.643	734.808	1375.52	99.1907	728.314	1360.81	246.99	802.938	1170.32	8.88618	776.804	1190.37	329.229	701.855	1152.76	154.753	803.8	859.974	-163.982	518.747	885.785	-144.777	533.362	899.065	-61.3193	437.662	905.192	-77.4667	345.21	881.143	-70.4795	768.746	851.897	486.708	484.516	868.127	499.31	488.133	887.367	417.303	400.243	924.351	435.282	304.544	884.812	413.518
165	1.64	690.935	1394.92	173.542	734.919	1375.52	99.1258	728.386	1360.85	246.954	802.948	1170.34	8.90766	776.821	1190.39	329.245	701.892	1152.79	154.738	803.771	859.974	-163.99	518.75	885.818	-144.768	533.452	899.099	-61.3619	437.645	905.21	-77.4554	345.18	881.187	-70.464	768.739	851.885	486.721	484.524	868.133	499.337	487.713	888	416.792	400.26	924.341	435.294	304.563	884.805	413.524
166	1.65	690.922	1394.99	173.48	734.992	1375.51	99.0363	728.427	1360.89	246.91	802.928	1170.38	8.90624	776.819	1190.44	329.242	701.924	1152.81	154.742	803.747	859.971	-164.001	518.761	885.827	-144.752	533.437	899.15	-61.3556	437.607	905.231	-77.4344	345.166	881.196	-70.4687	768.733	851.901	486.72	484.496	868.127	499.34	487.609	888.178	416.623	400.209	924.364	435.295	304.541	884.828	413.528
167	1.66	690.799	1395.07	173.454	734.979	1375.51	99.0054	728.428	1360.94	246.838	802.905	1170.4	8.88839	776.79	1190.47	329.229	701.936	1152.82	154.739	803.753	859.998	-164.016	518.748	885.849	-144.764	533.382	899.188	-61.3353	437.567	905.258	-77.4459	345.133	881.216	-70.4605	768.718	851.952	486.7	484.467	868.156	499.327	487.593	888.23	416.578	400.126	924.438	435.268	304.512	884.852	413.524
168	1.67	690.78	1395.12	173.415	735.018	1375.49	98.9571	728.427	1360.99	246.763	802.856	1170.41	8.87707	776.754	1190.48	329.218	701.921	1152.83	154.738	803.752	860.01	-164.029	518.734	885.846	-144.769	533.356	899.153	-61.3245	437.572	905.248	-77.4597	345.168	881.191	-70.469	768.701	852.009	486.716	484.382	868.156	499.324	487.701	887.984	416.808	399.976	924.52	435.29	304.437	884.876	413.514
169	1.68	690.895	1395.16	173.357	735.074	1375.5	98.9263	728.431	1361.04	246.708	802.845	1170.39	8.86364	776.714	1190.48	329.21	701.907	1152.86	154.738	803.758	860.044	-164.029	518.743	885.815	-144.779	533.343	899.117	-61.2982	437.581	905.243	-77.442	345.214	881.175	-70.4901	768.686	852.054	486.729	484.37	868.191	499.33	487.852	887.647	417.091	399.787	924.643	435.304	304.385	884.889	413.527
170	1.69	690.955	1395.24	173.325	735.11	1375.52	98.8992	728.448	1361.09	246.651	802.822	1170.39	8.84284	776.696	1190.48	329.201	701.858	1152.89	154.724	803.736	860.063	-164.057	518.766	885.795	-144.79	533.292	899.1	-61.2951	437.601	905.237	-77.4257	345.241	881.162	-70.5011	768.705	852.117	486.712	484.377	868.215	499.328	487.735	887.847	416.907	399.719	924.709	435.279	304.351	884.907	413.533
171	1.7	690.868	1395.31	173.302	735.196	1375.51	98.825	728.462	1361.11	246.577	802.787	1170.38	8.80451	776.676	1190.49	329.18	701.84	1152.91	154.691	803.714	860.06	-164.111	518.733	885.805	-144.831	533.241	899.089	-61.3194	437.606	905.215	-77.4468	345.242	881.141	-70.5154	768.683	852.123	486.694	484.378	868.254	499.312	488.04	887.346	417.327	399.676	924.713	435.235	304.334	884.914	413.509
172	1.71	690.823	1395.36	173.256	735.249	1375.5	98.7843	728.482	1361.1	246.53	802.751	1170.36	8.77338	776.667	1190.49	329.157	701.88	1152.89	154.687	803.67	860.023	-164.146	518.709	885.807	-144.85	533.206	899.077	-61.3255	437.588	905.191	-77.4668	345.222	881.127	-70.5088	768.668	852.122	486.677	484.381	868.251	499.313	487.933	887.503	417.211	399.712	924.662	435.223	304.355	884.894	413.502
173	1.72	690.879	1395.34	173.226	735.297	1375.47	98.7478	728.546	1361.1	246.523	802.753	1170.35	8.76941	776.679	1190.51	329.16	701.862	1152.92	154.698	803.635	859.997	-164.173	518.733	885.8	-144.851	533.25	899.074	-61.3292	437.581	905.165	-77.475	345.212	881.134	-70.5003	768.641	852.11	486.68	484.397	868.195	499.324	487.586	888.074	416.711	399.812	924.582	435.242	304.395	884.875	413.522
174	1.73	690.955	1395.33	173.226	735.318	1375.47	98.747	728.623	1361.09	246.537	802.782	1170.34	8.7821	776.692	1190.53	329.176	701.835	1152.96	154.691	803.586	859.956	-164.182	518.721	885.804	-144.826	533.282	899.094	-61.3212	437.597	905.169	-77.468	345.199	881.134	-70.4769	768.66	852.09	486.708	484.4	868.142	499.32	487.716	887.909	416.851	399.896	924.491	435.287	304.428	884.847	413.533
175	1.74	691	1395.32	173.23	735.344	1375.46	98.7291	728.651	1361.08	246.545	802.815	1170.35	8.79579	776.704	1190.57	329.181	701.805	1152.97	154.695	803.601	859.942	-164.174	518.68	885.819	-144.786	533.285	899.112	-61.3251	437.587	905.187	-77.474	345.152	881.143	-70.442	768.698	852.099	486.717	484.385	868.111	499.307	487.927	887.611	417.166	399.992	924.418	435.275	304.433	884.81	413.535
176	1.75	691.074	1395.32	173.237	735.316	1375.48	98.7385	728.663	1361.07	246.543	802.822	1170.35	8.78467	776.711	1190.57	329.172	701.805	1152.98	154.701	803.629	859.941	-164.201	518.679	885.823	-144.768	533.347	899.116	-61.318	437.576	905.187	-77.4623	345.163	881.152	-70.435	768.735	852.135	486.703	484.405	868.081	499.305	487.608	888.066	416.737	400.114	924.355	435.273	304.442	884.798	413.54
177	1.76	691.154	1395.33	173.247	735.316	1375.52	98.7766	728.711	1361.05	246.54	802.827	1170.35	8.76674	776.736	1190.57	329.143	701.889	1152.96	154.695	803.652	859.942	-164.203	518.748	885.81	-144.784	533.362	899.105	-61.3168	437.631	905.189	-77.464	345.24	881.15	-70.4617	768.734	852.168	486.71	484.509	868.119	499.315	487.568	888.172	416.61	400.233	924.293	435.305	304.491	884.79	413.537
178	1.77	691.098	1395.37	173.253	735.344	1375.54	98.7815	728.759	1361.04	246.536	802.814	1170.35	8.73407	776.723	1190.58	329.118	701.932	1152.98	154.65	803.625	859.935	-164.194	518.757	885.804	-144.812	533.338	899.08	-61.3264	437.636	905.193	-77.4812	345.269	881.136	-70.4776	768.701	852.219	486.728	484.538	868.175	499.318	487.605	888.233	416.566	400.135	924.371	435.306	304.504	884.809	413.52
179	1.78	691.018	1395.46	173.25	735.309	1375.57	98.7704	728.752	1361.07	246.496	802.785	1170.37	8.67714	776.684	1190.63	329.096	701.925	1153.01	154.594	803.628	859.962	-164.202	518.716	885.815	-144.844	533.244	899.07	-61.3107	437.56	905.195	-77.481	345.202	881.154	-70.4774	768.688	852.283	486.726	484.529	868.246	499.31	487.737	888.005	416.813	399.997	924.503	435.262	304.454	884.848	413.506
180	1.79	690.967	1395.48	173.259	735.301	1375.59	98.7371	728.751	1361.08	246.481	802.755	1170.39	8.64075	776.651	1190.67	329.078	701.865	1153.07	154.572	803.654	859.981	-164.195	518.688	885.825	-144.853	533.267	899.087	-61.3374	437.594	905.201	-77.4851	345.149	881.182	-70.4799	768.674	852.343	486.731	484.522	868.288	499.305	487.893	887.688	417.096	399.913	924.585	435.211	304.391	884.886	413.494
181	1.8	691.095	1395.43	173.272	735.292	1375.57	98.7444	728.783	1361.08	246.498	802.747	1170.41	8.63471	776.662	1190.71	329.079	701.881	1153.11	154.567	803.668	859.997	-164.191	518.7	885.829	-144.847	533.325	899.064	-61.3625	437.615	905.205	-77.4731	345.167	881.179	-70.4781	768.643	852.397	486.747	484.495	868.311	499.313	487.574	888.188	416.688	399.831	924.631	435.242	304.364	884.915	413.493
182	1.81	691.272	1395.34	173.308	735.239	1375.55	98.7831	728.812	1361.07	246.531	802.752	1170.41	8.6381	776.628	1190.74	329.082	701.907	1153.13	154.57	803.695	859.996	-164.191	518.698	885.827	-144.827	533.332	899.039	-61.3593	437.602	905.216	-77.4503	345.16	881.183	-70.463	768.63	852.447	486.782	484.46	868.302	499.325	487.482	888.311	416.596	399.789	924.656	435.25	304.357	884.908	413.503
183	1.82	691.205	1395.3	173.336	735.202	1375.55	98.8167	728.818	1361.05	246.572	802.735	1170.4	8.63486	776.61	1190.75	329.097	701.827	1153.14	154.599	803.667	859.969	-164.195	518.681	885.826	-144.792	533.298	899.018	-61.3284	437.575	905.234	-77.4082	345.107	881.193	-70.4326	768.616	852.466	486.767	484.393	868.257	499.291	487.615	888.033	416.812	399.874	924.549	435.27	304.339	884.891	413.513
184	1.83	691.215	1395.23	173.389	735.156	1375.54	98.8608	728.849	1361.03	246.605	802.749	1170.37	8.64453	776.646	1190.75	329.1	701.839	1153.12	154.61	803.656	859.929	-164.184	518.691	885.798	-144.769	533.258	898.973	-61.2933	437.597	905.215	-77.3811	345.13	881.184	-70.4149	768.632	852.476	486.76	484.393	868.24	499.303	487.857	887.675	417.115	399.971	924.459	435.307	304.359	884.859	413.521
185	1.84	691.255	1395.2	173.389	735.162	1375.52	98.8858	728.901	1360.97	246.637	802.766	1170.33	8.6378	776.699	1190.74	329.093	701.912	1153.09	154.599	803.659	859.902	-164.179	518.748	885.746	-144.77	533.259	898.888	-61.2844	437.641	905.221	-77.3669	345.179	881.174	-70.4013	768.681	852.474	486.758	484.44	868.224	499.311	487.617	888.115	416.691	400.093	924.384	435.297	304.435	884.822	413.519
186	1.85	691.205	1395.19	173.396	735.149	1375.52	98.8853	728.894	1360.93	246.641	802.777	1170.3	8.59638	776.706	1190.71	329.079	701.925	1153.11	154.607	803.649	859.857	-164.179	518.771	885.697	-144.791	533.286	898.808	-61.2995	437.688	905.209	-77.4023	345.21	881.15	-70.428	768.673	852.444	486.759	484.475	868.218	499.315	487.568	888.205	416.599	400.066	924.399	435.242	304.453	884.811	413.511
187	1.86	691.138	1395.18	173.426	735.109	1375.54	98.8675	728.87	1360.89	246.649	802.75	1170.27	8.55751	776.672	1190.69	329.055	701.933	1153.14	154.579	803.657	859.813	-164.196	518.778	885.651	-144.825	533.31	898.722	-61.3433	437.688	905.223	-77.3943	345.243	881.136	-70.4551	768.653	852.411	486.764	484.453	868.219	499.316	487.545	888.241	416.577	400.133	924.368	435.246	304.46	884.801	413.506
188	1.87	691.154	1395.19	173.454	735.081	1375.53	98.8774	728.866	1360.88	246.667	802.738	1170.28	8.53723	776.688	1190.7	329.059	701.917	1153.18	154.548	803.66	859.774	-164.197	518.828	885.601	-144.844	533.341	898.64	-61.3805	437.725	905.247	-77.3675	345.276	881.135	-70.4639	768.646	852.409	486.75	484.478	868.26	499.305	487.557	888.274	416.565	400.218	924.34	435.23	304.46	884.823	413.511
189	1.88	691.16	1395.18	173.462	735.089	1375.5	98.8818	728.812	1360.9	246.682	802.718	1170.28	8.51786	776.714	1190.71	329.062	701.927	1153.2	154.54	803.674	859.771	-164.202	518.889	885.53	-144.844	533.38	898.539	-61.3824	437.792	905.258	-77.3393	345.328	881.146	-70.4406	768.637	852.435	486.743	484.51	868.292	499.307	487.557	888.293	416.557	400.084	924.433	435.223	304.437	884.844	413.521
190	1.89	691.102	1395.11	173.484	735.06	1375.48	98.8936	728.772	1360.9	246.688	802.691	1170.3	8.50982	776.702	1190.74	329.066	701.895	1153.23	154.545	803.69	859.789	-164.211	518.913	885.476	-144.845	533.389	898.431	-61.3729	437.815	905.296	-77.3114	345.336	881.16	-70.4229	768.622	852.446	486.745	484.513	868.291	499.336	487.691	888.043	416.79	399.923	924.534	435.2	304.378	884.855	413.516
191	1.9	691.02	1395.08	173.509	735.03	1375.49	98.8963	728.727	1360.89	246.697	802.672	1170.34	8.50771	776.681	1190.77	329.071	701.903	1153.22	154.556	803.698	859.796	-164.193	518.935	885.419	-144.852	533.383	898.322	-61.3688	437.834	905.363	-77.274	345.307	881.179	-70.409	768.602	852.437	486.716	484.521	868.287	499.316	488.028	887.448	417.324	399.81	924.591	435.212	304.342	884.881	413.502
192	1.91	691.09	1395.05	173.514	734.994	1375.48	98.9356	728.729	1360.88	246.736	802.665	1170.35	8.51262	776.688	1190.78	329.089	701.878	1153.22	154.575	803.765	859.798	-164.179	518.991	885.322	-144.86	533.501	898.2	-61.4151	437.85	905.431	-77.218	345.337	881.179	-70.4099	768.578	852.43	486.711	484.521	868.283	499.295	487.891	887.605	417.213	399.799	924.603	435.225	304.359	884.887	413.51
193	1.92	691.096	1395.06	173.551	734.948	1375.5	99.003	728.706	1360.87	246.765	802.656	1170.34	8.49806	776.701	1190.77	329.12	701.898	1153.24	154.57	803.86	859.786	-164.156	519.049	885.213	-144.851	533.596	898.055	-61.4337	437.941	905.47	-77.186	345.404	881.174	-70.4002	768.618	852.442	486.706	484.484	868.3	499.302	487.542	888.181	416.692	399.824	924.581	435.251	304.394	884.879	413.536
194	1.93	690.967	1395.07	173.608	734.918	1375.5	99.0396	728.671	1360.85	246.783	802.625	1170.31	8.48615	776.715	1190.76	329.128	701.956	1153.23	154.561	803.922	859.764	-164.123	519.095	885.12	-144.864	533.715	897.872	-61.4817	438.036	905.516	-77.1844	345.487	881.181	-70.4125	768.661	852.447	486.698	484.527	868.339	499.289	487.485	888.301	416.574	399.832	924.591	435.241	304.407	884.868	413.534
195	1.94	690.822	1395.1	173.606	734.88	1375.51	99.0161	728.653	1360.83	246.805	802.605	1170.28	8.45606	776.723	1190.73	329.105	701.938	1153.23	154.566	803.951	859.721	-164.117	519.133	885.031	-144.899	533.868	897.681	-61.5784	438.107	905.581	-77.1672	345.546	881.177	-70.4511	768.692	852.416	486.694	484.511	868.321	499.294	487.531	888.285	416.546	399.928	924.531	435.222	304.42	884.864	413.498
196	1.95	690.873	1395.1	173.598	734.895	1375.52	99.0118	728.659	1360.8	246.836	802.593	1170.26	8.44599	776.721	1190.72	329.112	701.94	1153.24	154.574	803.998	859.698	-164.095	519.168	884.936	-144.931	534.008	897.49	-61.6431	438.145	905.653	-77.1378	345.577	881.186	-70.4819	768.7	852.368	486.695	484.469	868.261	499.304	487.752	887.976	416.803	400.11	924.433	435.226	304.444	884.846	413.499
197	1.96	690.922	1395.04	173.622	734.912	1375.51	99.0452	728.665	1360.76	246.867	802.562	1170.25	8.44405	776.74	1190.71	329.129	701.985	1153.22	154.572	804.071	859.666	-164.079	519.217	884.847	-144.944	534.167	897.317	-61.6775	438.261	905.699	-77.1212	345.6	881.188	-70.4462	768.715	852.354	486.718	484.492	868.202	499.321	487.973	887.582	417.106	400.147	924.341	435.257	304.491	884.808	413.504
198	1.97	690.901	1394.98	173.698	734.837	1375.5	99.1021	728.665	1360.73	246.902	802.525	1170.23	8.4409	776.743	1190.7	329.13	701.976	1153.24	154.581	804.106	859.636	-164.043	519.23	884.795	-144.943	534.264	897.189	-61.7013	438.361	905.722	-77.0974	345.617	881.208	-70.4203	768.71	852.348	486.707	484.486	868.172	499.32	487.845	887.789	416.943	400.209	924.306	435.271	304.507	884.806	413.517
199	1.98	690.883	1394.9	173.765	734.79	1375.49	99.1412	728.641	1360.71	246.943	802.512	1170.25	8.46002	776.7	1190.71	329.137	701.922	1153.26	154.609	804.158	859.614	-163.993	519.25	884.754	-144.931	534.28	897.066	-61.6904	438.426	905.756	-77.0834	345.646	881.212	-70.4386	768.701	852.346	486.691	484.447	868.15	499.312	488.188	887.287	417.414	400.254	924.27	435.274	304.493	884.822	413.506
200	1.99	690.949	1394.88	173.807	734.76	1375.48	99.1887	728.629	1360.7	246.995	802.463	1170.28	8.46517	776.683	1190.74	329.154	701.867	1153.29	154.632	804.202	859.568	-163.944	519.285	884.722	-144.919	534.28	896.968	-61.6364	438.448	905.8	-77.0605	345.658	881.215	-70.4246	768.724	852.349	486.692	484.447	868.152	499.3	488.074	887.444	417.273	400.152	924.343	435.254	304.482	884.821	413.514
201	2	690.975	1394.9	173.847	734.701	1375.5	99.2662	728.63	1360.73	247.062	802.442	1170.31	8.46722	776.707	1190.77	329.173	701.857	1153.33	154.645	804.261	859.547	-163.919	519.33	884.712	-144.915	534.324	896.922	-61.6156	438.515	905.857	-77.0547	345.679	881.238	-70.4031	768.751	852.383	486.703	484.439	868.197	499.31	487.66	888.078	416.752	400.133	924.392	435.242	304.458	884.853	413.522
202	2.01	690.851	1394.96	173.916	734.649	1375.54	99.2961	728.592	1360.75	247.094	802.439	1170.33	8.45605	776.708	1190.8	329.171	701.78	1153.4	154.644	804.31	859.542	-163.897	519.37	884.711	-144.935	534.38	896.894	-61.6493	438.623	905.882	-77.1102	345.714	881.242	-70.4047	768.72	852.404	486.707	484.443	868.232	499.309	487.519	888.273	416.631	400.056	924.475	435.233	304.452	884.887	413.52
203	2.02	690.771	1395.01	173.972	734.611	1375.55	99.2995	728.515	1360.74	247.103	802.4	1170.35	8.42768	776.686	1190.81	329.16	701.789	1153.41	154.622	804.312	859.504	-163.872	519.347	884.704	-144.952	534.429	896.851	-61.6819	438.592	905.902	-77.1182	345.725	881.249	-70.4057	768.662	852.411	486.713	484.481	868.291	499.311	487.462	888.341	416.597	399.892	924.613	435.212	304.397	884.914	413.515
204	2.03	690.821	1395.01	174.001	734.58	1375.59	99.2976	728.531	1360.74	247.125	802.345	1170.34	8.39811	776.669	1190.8	329.134	701.826	1153.38	154.616	804.286	859.474	-163.871	519.358	884.664	-144.954	534.494	896.799	-61.7306	438.591	905.88	-77.1286	345.735	881.218	-70.414	768.633	852.426	486.717	484.457	868.302	499.332	487.465	888.346	416.555	399.755	924.689	435.22	304.355	884.925	413.51
205	2.04	690.855	1394.94	174.031	734.573	1375.59	99.3417	728.597	1360.7	247.178	802.325	1170.32	8.3632	776.643	1190.76	329.12	701.837	1153.36	154.606	804.289	859.438	-163.852	519.363	884.609	-144.952	534.58	896.768	-61.7781	438.639	905.816	-77.1496	345.771	881.177	-70.4144	768.621	852.419	486.704	484.463	868.269	499.329	487.623	888.013	416.761	399.723	924.684	435.224	304.356	884.905	413.504
206	2.05	690.975	1394.86	174.083	734.509	1375.56	99.3892	728.621	1360.67	247.203	802.326	1170.31	8.35308	776.645	1190.75	329.116	701.801	1153.34	154.605	804.33	859.41	-163.819	519.392	884.561	-144.939	534.672	896.72	-61.7888	438.674	905.797	-77.1604	345.782	881.169	-70.4397	768.608	852.412	486.691	484.432	868.247	499.323	487.841	887.633	417.052	399.807	924.617	435.224	304.387	884.861	413.495
207	2.06	690.953	1394.84	174.119	734.497	1375.51	99.3851	728.576	1360.63	247.22	802.313	1170.31	8.37262	776.642	1190.76	329.13	701.766	1153.33	154.608	804.347	859.387	-163.785	519.396	884.529	-144.921	534.64	896.695	-61.7687	438.621	905.815	-77.1071	345.77	881.157	-70.4077	768.612	852.406	486.714	484.415	868.211	499.34	487.542	888.108	416.663	399.854	924.573	435.28	304.393	884.832	413.497
208	2.07	690.955	1394.83	174.12	734.51	1375.5	99.3771	728.563	1360.64	247.259	802.305	1170.33	8.40538	776.623	1190.78	329.163	701.745	1153.33	154.619	804.324	859.345	-163.743	519.398	884.52	-144.907	534.541	896.716	-61.7321	438.573	905.833	-77.0839	345.716	881.166	-70.3751	768.597	852.382	486.721	484.412	868.183	499.353	487.479	888.223	416.572	399.995	924.462	435.294	304.407	884.807	413.511
209	2.08	690.971	1394.83	174.13	734.419	1375.52	99.4307	728.578	1360.65	247.288	802.303	1170.35	8.42573	776.618	1190.82	329.187	701.706	1153.37	154.633	804.366	859.3	-163.694	519.403	884.529	-144.898	534.487	896.755	-61.6902	438.58	905.865	-77.0807	345.722	881.178	-70.3815	768.601	852.381	486.716	484.445	868.176	499.344	487.445	888.247	416.577	400.048	924.407	435.287	304.454	884.805	413.526
210	2.09	690.675	1394.95	174.17	734.342	1375.54	99.4326	728.539	1360.66	247.295	802.28	1170.36	8.45528	776.602	1190.86	329.213	701.676	1153.41	154.637	804.434	859.265	-163.675	519.411	884.546	-144.877	534.465	896.789	-61.6837	438.594	905.891	-77.0711	345.735	881.208	-70.3785	768.653	852.416	486.709	484.481	868.195	499.318	487.485	888.271	416.593	400.094	924.377	435.3	304.425	884.829	413.538
211	2.1	690.601	1394.98	174.127	734.319	1375.55	99.4024	728.494	1360.69	247.292	802.266	1170.4	8.47312	776.6	1190.9	329.241	701.643	1153.45	154.619	804.437	859.259	-163.647	519.403	884.576	-144.874	534.393	896.809	-61.643	438.602	905.938	-77.078	345.712	881.235	-70.385	768.656	852.455	486.721	484.515	868.252	499.327	487.499	888.288	416.595	400.15	924.363	435.306	304.409	884.847	413.534
212	2.11	690.654	1394.97	174.095	734.29	1375.57	99.3863	728.473	1360.73	247.277	802.243	1170.42	8.45864	776.57	1190.91	329.235	701.629	1153.46	154.632	804.43	859.272	-163.623	519.405	884.577	-144.894	534.408	896.801	-61.6457	438.603	905.952	-77.1065	345.723	881.254	-70.4166	768.623	852.475	486.72	484.521	868.244	499.332	487.512	888.296	416.585	400.097	924.455	435.266	304.412	884.867	413.534
213	2.12	690.669	1394.95	174.059	734.279	1375.56	99.3837	728.443	1360.75	247.238	802.21	1170.41	8.4414	776.542	1190.88	329.215	701.697	1153.42	154.64	804.434	859.297	-163.606	519.441	884.554	-144.914	534.5	896.783	-61.7107	438.624	905.928	-77.1475	345.738	881.241	-70.4187	768.615	852.495	486.737	484.484	868.231	499.325	487.659	888.034	416.791	399.973	924.525	435.248	304.393	884.865	413.513
214	2.13	690.619	1394.93	174.064	734.273	1375.55	99.3851	728.422	1360.74	247.226	802.189	1170.4	8.43706	776.552	1190.87	329.218	701.692	1153.4	154.658	804.455	859.313	-163.616	519.424	884.544	-144.911	534.488	896.759	-61.7293	438.611	905.917	-77.1586	345.744	881.226	-70.399	768.632	852.511	486.761	484.452	868.244	499.32	487.834	887.679	417.057	399.906	924.578	435.226	304.376	884.869	413.482
215	2.14	690.574	1394.89	174.05	734.299	1375.52	99.3672	728.377	1360.74	247.224	802.203	1170.39	8.45033	776.543	1190.85	329.224	701.658	1153.4	154.653	804.486	859.365	-163.621	519.405	884.545	-144.91	534.464	896.748	-61.7147	438.583	905.923	-77.1521	345.734	881.233	-70.3872	768.626	852.502	486.787	484.409	868.238	499.333	487.505	888.132	416.638	399.877	924.585	435.213	304.367	884.87	413.484
216	2.15	690.578	1394.84	174.016	734.259	1375.5	99.3684	728.326	1360.74	247.22	802.227	1170.4	8.42959	776.544	1190.83	329.229	701.65	1153.41	154.647	804.429	859.369	-163.634	519.395	884.547	-144.933	534.465	896.761	-61.7452	438.6	905.896	-77.175	345.728	881.216	-70.4172	768.608	852.475	486.782	484.382	868.232	499.321	487.446	888.239	416.546	399.872	924.592	435.201	304.35	884.869	413.484
217	2.16	690.589	1394.8	173.993	734.248	1375.49	99.3433	728.28	1360.73	247.234	802.245	1170.41	8.42978	776.568	1190.83	329.237	701.686	1153.42	154.631	804.401	859.375	-163.647	519.382	884.563	-144.943	534.445	896.776	-61.7409	438.583	905.905	-77.1656	345.736	881.217	-70.4171	768.609	852.456	486.776	484.402	868.221	499.326	487.453	888.256	416.539	399.929	924.569	435.214	304.367	884.851	413.483
218	2.17	690.619	1394.79	173.999	734.251	1375.5	99.3695	728.291	1360.71	247.274	802.3	1170.44	8.4524	776.633	1190.84	329.257	701.63	1153.45	154.653	804.467	859.406	-163.641	519.368	884.588	-144.928	534.438	896.798	-61.7174	438.569	905.945	-77.173	345.715	881.232	-70.393	768.646	852.432	486.763	484.444	868.222	499.311	487.469	888.262	416.555	400.026	924.504	435.235	304.412	884.844	413.488
219	2.18	690.439	1394.81	174.05	734.205	1375.51	99.4395	728.29	1360.71	247.324	802.367	1170.47	8.47846	776.674	1190.83	329.295	701.619	1153.48	154.683	804.499	859.412	-163.643	519.388	884.614	-144.906	534.416	896.84	-61.6999	438.645	905.959	-77.1908	345.716	881.243	-70.3764	768.669	852.395	486.748	484.496	868.209	499.298	487.547	888.278	416.573	400.076	924.448	435.295	304.434	884.844	413.516
220	2.19	690.457	1394.78	174.101	734.184	1375.51	99.4973	728.306	1360.71	247.364	802.392	1170.49	8.50231	776.684	1190.84	329.323	701.654	1153.5	154.703	804.474	859.386	-163.655	519.398	884.62	-144.903	534.42	896.86	-61.678	438.671	905.966	-77.2081	345.753	881.232	-70.3658	768.651	852.355	486.748	484.493	868.204	499.33	487.592	888.271	416.597	400.094	924.424	435.317	304.456	884.836	413.539
221	2.2	690.562	1394.71	174.129	734.212	1375.48	99.4906	728.304	1360.69	247.38	802.404	1170.48	8.49746	776.71	1190.81	329.307	701.67	1153.49	154.7	804.434	859.371	-163.651	519.41	884.61	-144.93	534.432	896.854	-61.7032	438.63	905.955	-77.2168	345.77	881.217	-70.4048	768.619	852.316	486.736	484.496	868.185	499.343	487.538	888.263	416.57	400.073	924.45	435.277	304.466	884.823	413.537
222	2.21	690.608	1394.69	174.115	734.214	1375.44	99.5022	728.279	1360.66	247.395	802.415	1170.47	8.48273	776.734	1190.78	329.29	701.748	1153.47	154.681	804.433	859.347	-163.666	519.437	884.585	-144.942	534.454	896.828	-61.7415	438.64	905.943	-77.2185	345.771	881.203	-70.4209	768.634	852.299	486.712	484.486	868.189	499.331	487.558	888.266	416.56	400	924.479	435.266	304.444	884.838	413.53
223	2.22	690.64	1394.65	174.158	734.198	1375.45	99.5177	728.246	1360.66	247.424	802.42	1170.48	8.48945	776.765	1190.76	329.306	701.789	1153.47	154.671	804.412	859.307	-163.667	519.441	884.557	-144.945	534.502	896.778	-61.746	438.634	905.931	-77.1973	345.773	881.191	-70.4034	768.657	852.292	486.695	484.481	868.208	499.319	487.725	888.008	416.807	399.933	924.484	435.27	304.411	884.846	413.516
224	2.23	690.627	1394.65	174.228	734.209	1375.47	99.5602	728.232	1360.66	247.461	802.429	1170.48	8.49439	776.779	1190.75	329.318	701.755	1153.49	154.692	804.399	859.307	-163.639	519.435	884.53	-144.951	534.46	896.764	-61.7299	438.594	905.919	-77.1745	345.733	881.203	-70.3782	768.639	852.28	486.675	484.435	868.215	499.338	488.041	887.386	417.339	399.904	924.529	435.287	304.366	884.86	413.514
225	2.24	690.523	1394.69	174.286	734.219	1375.46	99.6269	728.281	1360.65	247.503	802.42	1170.48	8.48148	776.786	1190.74	329.297	701.755	1153.48	154.693	804.434	859.324	-163.623	519.45	884.515	-144.959	534.489	896.755	-61.7479	438.627	905.915	-77.2019	345.789	881.202	-70.4042	768.65	852.286	486.668	484.377	868.218	499.333	487.942	887.512	417.226	399.789	924.624	435.286	304.36	884.873	413.498
226	2.25	690.553	1394.66	174.332	734.235	1375.48	99.6596	728.333	1360.65	247.53	802.431	1170.49	8.47577	776.838	1190.74	329.296	701.815	1153.46	154.696	804.477	859.308	-163.617	519.474	884.496	-144.961	534.594	896.747	-61.7873	438.731	905.926	-77.2518	345.877	881.196	-70.4353	768.663	852.306	486.652	484.409	868.249	499.31	487.568	888.128	416.723	399.67	924.698	435.258	304.376	884.89	413.485
227	2.26	690.606	1394.71	174.416	734.249	1375.52	99.6867	728.397	1360.65	247.566	802.433	1170.49	8.47663	776.884	1190.75	329.306	701.858	1153.46	154.713	804.544	859.305	-163.579	519.489	884.507	-144.949	534.651	896.741	-61.787	438.711	905.954	-77.2305	345.865	881.213	-70.4207	768.691	852.338	486.676	484.411	868.263	499.282	487.48	888.286	416.594	399.669	924.695	435.241	304.38	884.901	413.499
228	2.27	690.779	1394.75	174.474	734.308	1375.54	99.7346	728.444	1360.64	247.61	802.43	1170.48	8.4903	776.892	1190.75	329.319	701.827	1153.49	154.754	804.612	859.315	-163.516	519.506	884.514	-144.942	534.6	896.743	-61.7591	438.67	905.985	-77.2226	345.825	881.242	-70.388	768.705	852.324	486.698	484.464	868.271	499.291	487.462	888.329	416.567	399.775	924.632	435.231	304.374	884.905	413.517
229	2.28	690.856	1394.78	174.533	734.317	1375.54	99.783	728.528	1360.65	247.638	802.479	1170.47	8.49654	776.901	1190.76	329.317	701.805	1153.51	154.746	804.649	859.263	-163.508	519.511	884.515	-144.95	534.567	896.737	-61.7447	438.775	905.985	-77.2826	345.844	881.245	-70.4085	768.733	852.311	486.681	484.514	868.259	499.31	487.688	888.036	416.795	399.894	924.566	435.222	304.43	884.877	413.505
230	2.29	690.942	1394.78	174.549	734.297	1375.54	99.8205	728.578	1360.64	247.643	802.494	1170.44	8.49868	776.931	1190.75	329.325	701.836	1153.47	154.724	804.68	859.196	-163.497	519.521	884.51	-144.952	534.574	896.723	-61.7493	438.8	905.983	-77.3106	345.851	881.222	-70.4112	768.75	852.287	486.673	484.479	868.22	499.312	487.948	887.672	417.122	400.025	924.481	435.213	304.457	884.851	413.501
231	2.3	691.024	1394.75	174.543	734.357	1375.54	99.7917	728.61	1360.64	247.637	802.49	1170.4	8.50536	776.937	1190.74	329.332	701.864	1153.44	154.736	804.715	859.141	-163.491	519.531	884.5	-144.95	534.596	896.729	-61.7589	438.77	905.992	-77.3093	345.836	881.21	-70.3959	768.744	852.237	486.668	484.476	868.17	499.324	487.816	887.818	416.956	400.067	924.422	435.235	304.484	884.816	413.515
232	2.31	691.068	1394.78	174.587	734.374	1375.54	99.7902	728.696	1360.65	247.632	802.49	1170.38	8.52488	776.949	1190.73	329.334	701.853	1153.45	154.756	804.743	859.104	-163.466	519.519	884.495	-144.945	534.554	896.719	-61.743	438.77	905.985	-77.2827	345.863	881.203	-70.3758	768.761	852.222	486.663	484.483	868.154	499.339	487.974	887.574	417.171	400.151	924.387	435.277	304.51	884.797	413.528
233	2.32	691.112	1394.88	174.59	734.383	1375.55	99.7744	728.724	1360.67	247.605	802.478	1170.36	8.50726	776.943	1190.69	329.334	701.812	1153.44	154.766	804.736	859.072	-163.455	519.493	884.476	-144.953	534.61	896.691	-61.7644	438.779	905.964	-77.3106	345.868	881.214	-70.3845	768.773	852.215	486.661	484.492	868.156	499.324	487.609	888.078	416.705	400.091	924.447	435.283	304.522	884.812	413.51
234	2.33	691.144	1394.96	174.554	734.39	1375.58	99.7533	728.767	1360.69	247.567	802.451	1170.34	8.49532	776.934	1190.66	329.317	701.773	1153.46	154.785	804.737	859.061	-163.428	519.504	884.441	-144.959	534.651	896.692	-61.7863	438.815	905.954	-77.3514	345.901	881.205	-70.4171	768.776	852.222	486.655	484.49	868.197	499.328	487.586	888.205	416.592	400.008	924.469	435.292	304.5	884.831	413.496
235	2.34	690.992	1395.1	174.551	734.432	1375.6	99.7476	728.814	1360.75	247.56	802.42	1170.34	8.51206	776.951	1190.66	329.31	701.798	1153.46	154.798	804.754	859.04	-163.377	519.514	884.434	-144.957	534.63	896.718	-61.7691	438.831	905.948	-77.3633	345.885	881.21	-70.4069	768.759	852.218	486.647	484.491	868.215	499.349	487.566	888.281	416.581	399.963	924.479	435.317	304.469	884.865	413.509
236	2.35	691.109	1395.16	174.55	734.484	1375.62	99.7184	728.83	1360.82	247.557	802.402	1170.36	8.53877	776.954	1190.67	329.316	701.839	1153.47	154.816	804.756	859.034	-163.359	519.522	884.449	-144.938	534.637	896.743	-61.7632	438.827	905.944	-77.3528	345.827	881.226	-70.3893	768.711	852.19	486.649	484.464	868.227	499.345	487.5	888.307	416.585	399.909	924.543	435.32	304.427	884.882	413.514
237	2.36	691.243	1395.19	174.499	734.597	1375.61	99.6542	728.824	1360.89	247.521	802.374	1170.35	8.54846	776.942	1190.68	329.319	701.807	1153.5	154.807	804.737	859.044	-163.339	519.514	884.479	-144.945	534.587	896.801	-61.7593	438.809	905.928	-77.3724	345.824	881.234	-70.3891	768.689	852.166	486.633	484.439	868.249	499.343	487.474	888.336	416.581	399.827	924.615	435.303	304.404	884.895	413.522
238	2.37	691.42	1395.15	174.423	734.681	1375.6	99.5613	728.846	1360.92	247.467	802.365	1170.35	8.54812	776.921	1190.67	329.304	701.781	1153.49	154.771	804.7	859.015	-163.341	519.505	884.503	-144.966	534.61	896.836	-61.804	438.788	905.923	-77.3818	345.84	881.224	-70.4089	768.688	852.168	486.62	484.445	868.232	499.336	487.477	888.345	416.567	399.857	924.599	435.261	304.384	884.897	413.517
239	2.38	691.531	1395.17	174.369	734.683	1375.59	99.5278	728.852	1360.94	247.432	802.351	1170.31	8.55423	776.902	1190.65	329.293	701.778	1153.46	154.8	804.66	858.991	-163.377	519.503	884.511	-144.975	534.614	896.878	-61.8438	438.754	905.921	-77.3865	345.894	881.195	-70.4382	768.684	852.139	486.602	484.4	868.187	499.336	487.485	888.326	416.543	399.958	924.536	435.257	304.395	884.882	413.517
240	2.39	691.523	1395.21	174.35	734.657	1375.62	99.56	728.889	1360.95	247.421	802.332	1170.29	8.56629	776.911	1190.63	329.303	701.753	1153.47	154.824	804.658	858.985	-163.392	519.5	884.525	-144.987	534.604	896.919	-61.8535	438.753	905.885	-77.396	345.896	881.188	-70.443	768.698	852.121	486.609	484.423	868.174	499.347	487.506	888.308	416.572	399.991	924.532	435.268	304.425	884.858	413.527
241	2.4	691.547	1395.22	174.32	734.663	1375.64	99.5447	728.902	1360.95	247.386	802.323	1170.26	8.57918	776.9	1190.6	329.312	701.782	1153.44	154.806	804.675	858.969	-163.411	519.483	884.526	-145.012	534.529	896.951	-61.8572	438.679	905.874	-77.3733	345.852	881.183	-70.4367	768.706	852.09	486.624	484.43	868.179	499.353	487.487	888.268	416.567	400.027	924.489	435.293	304.438	884.843	413.536
242	2.41	691.55	1395.27	174.273	734.745	1375.63	99.486	728.914	1360.95	247.343	802.328	1170.23	8.57296	776.898	1190.58	329.306	701.827	1153.41	154.772	804.647	858.986	-163.453	519.468	884.531	-145.043	534.504	896.984	-61.8823	438.682	905.865	-77.3874	345.88	881.18	-70.4767	768.705	852.069	486.616	484.447	868.145	499.344	487.501	888.228	416.568	400.055	924.446	435.284	304.474	884.835	413.531
243	2.42	691.666	1395.26	174.215	734.831	1375.61	99.4354	728.96	1360.98	247.316	802.356	1170.24	8.57009	776.909	1190.57	329.305	701.896	1153.39	154.776	804.584	859.017	-163.476	519.463	884.546	-145.059	534.531	897.023	-61.9204	438.706	905.86	-77.4065	345.935	881.177	-70.4937	768.738	852.07	486.614	484.473	868.151	499.348	487.559	888.239	416.58	400.075	924.437	435.288	304.498	884.842	413.53
244	2.43	691.625	1395.29	174.204	734.798	1375.62	99.4675	728.924	1361.02	247.291	802.359	1170.25	8.59404	776.907	1190.59	329.32	701.86	1153.39	154.798	804.573	859.071	-163.496	519.45	884.558	-145.042	534.504	897.073	-61.8866	438.622	905.896	-77.3746	345.916	881.184	-70.4608	768.747	852.065	486.63	484.511	868.168	499.367	487.565	888.273	416.59	400.043	924.461	435.281	304.486	884.857	413.542
245	2.44	691.508	1395.3	174.212	734.777	1375.63	99.4668	728.856	1361.05	247.251	802.334	1170.27	8.61696	776.892	1190.61	329.321	701.806	1153.39	154.81	804.547	859.113	-163.525	519.422	884.575	-145.044	534.427	897.117	-61.8466	438.587	905.895	-77.358	345.811	881.208	-70.4099	768.741	852.076	486.631	484.452	868.157	499.36	487.518	888.297	416.596	400.034	924.48	435.273	304.443	884.873	413.541
246	2.45	691.575	1395.25	174.145	734.752	1375.62	99.4552	728.842	1361.06	247.198	802.33	1170.27	8.60205	776.875	1190.59	329.299	701.816	1153.38	154.799	804.551	859.137	-163.536	519.412	884.577	-145.067	534.448	897.122	-61.8958	438.634	905.872	-77.4044	345.776	881.216	-70.4218	768.738	852.1	486.62	484.381	868.137	499.356	487.481	888.293	416.592	399.962	924.544	435.258	304.425	884.883	413.513
247	2.46	691.636	1395.23	174.097	734.788	1375.63	99.4253	728.85	1361.08	247.166	802.327	1170.26	8.58926	776.861	1190.57	329.276	701.801	1153.37	154.792	804.55	859.166	-163.54	519.428	884.57	-145.089	534.443	897.115	-61.9041	438.69	905.863	-77.4231	345.805	881.218	-70.4351	768.749	852.119	486.589	484.353	868.143	499.35	487.443	888.301	416.556	399.851	924.602	435.285	304.393	884.899	413.499
248	2.47	691.692	1395.19	174.052	734.826	1375.62	99.3869	728.828	1361.08	247.143	802.325	1170.25	8.59741	776.878	1190.56	329.276	701.794	1153.37	154.787	804.593	859.195	-163.56	519.452	884.572	-145.078	534.452	897.099	-61.8768	438.679	905.876	-77.4075	345.785	881.22	-70.4037	768.748	852.13	486.586	484.389	868.18	499.355	487.449	888.315	416.554	399.822	924.604	435.298	304.355	884.915	413.502
249	2.48	691.609	1395.21	174.032	734.816	1375.63	99.3676	728.819	1361.07	247.14	802.315	1170.25	8.60141	776.89	1190.56	329.276	701.786	1153.37	154.777	804.63	859.186	-163.542	519.437	884.585	-145.056	534.434	897.1	-61.8602	438.636	905.892	-77.4073	345.823	881.219	-70.4108	768.765	852.131	486.583	484.395	868.18	499.349	487.482	888.315	416.562	399.804	924.595	435.296	304.367	884.909	413.512
250	2.49	691.465	1395.28	174.042	734.817	1375.63	99.3511	728.858	1361.09	247.133	802.312	1170.23	8.59605	776.922	1190.56	329.262	701.741	1153.4	154.772	804.622	859.147	-163.544	519.431	884.594	-145.065	534.428	897.09	-61.8777	438.666	905.906	-77.4261	345.859	881.219	-70.4541	768.771	852.096	486.569	484.404	868.193	499.326	487.478	888.293	416.543	399.782	924.598	435.269	304.418	884.893	413.51
251	2.5	691.475	1395.31	174.065	734.854	1375.62	99.3263	728.894	1361.08	247.136	802.341	1170.18	8.58152	776.963	1190.54	329.26	701.781	1153.39	154.774	804.628	859.083	-163.57	519.452	884.579	-145.082	534.526	897.065	-61.9158	438.689	905.9	-77.4419	345.89	881.216	-70.4764	768.772	852.031	486.543	484.468	868.202	499.317	487.551	888.26	416.556	399.83	924.59	435.261	304.458	884.876	413.51
252	2.51	691.432	1395.3	174.113	734.799	1375.61	99.3516	728.939	1361.07	247.133	802.364	1170.15	8.57477	776.988	1190.5	329.279	701.847	1153.38	154.793	804.659	859.011	-163.567	519.477	884.551	-145.059	534.565	897.03	-61.9076	438.738	905.873	-77.4507	345.896	881.209	-70.4657	768.792	851.993	486.517	484.504	868.189	499.323	487.776	887.952	416.832	400.057	924.473	435.288	304.498	884.859	413.526
253	2.52	691.419	1395.29	174.119	734.797	1375.58	99.3558	728.978	1361.05	247.154	802.362	1170.13	8.58006	777.023	1190.49	329.291	701.834	1153.37	154.822	804.661	858.952	-163.555	519.49	884.538	-145.039	534.544	897.021	-61.887	438.744	905.898	-77.4502	345.876	881.204	-70.4552	768.792	851.936	486.519	484.553	868.161	499.33	488.215	887.301	417.411	400.244	924.365	435.286	304.54	884.845	413.536
254	2.53	691.528	1395.22	174.064	734.815	1375.55	99.3267	728.995	1361.02	247.16	802.377	1170.1	8.5884	777.022	1190.46	329.27	701.867	1153.34	154.81	804.701	858.896	-163.533	519.468	884.527	-145.038	534.577	896.998	-61.9195	438.763	905.888	-77.4655	345.859	881.191	-70.4906	768.781	851.894	486.521	484.513	868.103	499.325	488.318	887.114	417.55	400.292	924.323	435.29	304.558	884.827	413.531
255	2.54	691.609	1395.13	174.02	734.803	1375.51	99.2979	729.006	1361.03	247.162	802.368	1170.09	8.58491	777.002	1190.44	329.248	701.91	1153.31	154.8	804.7	858.824	-163.496	519.516	884.488	-145.037	534.599	896.973	-61.9318	438.825	905.854	-77.4909	345.874	881.149	-70.5064	768.788	851.889	486.513	484.492	868.093	499.307	488.132	887.354	417.309	400.3	924.328	435.296	304.545	884.821	413.517
256	2.55	691.62	1395.1	174.03	734.804	1375.5	99.2671	729.011	1361.07	247.179	802.369	1170.08	8.58552	777.012	1190.44	329.249	701.896	1153.3	154.822	804.729	858.787	-163.459	519.537	884.472	-145.033	534.608	896.945	-61.899	438.847	905.854	-77.5016	345.9	881.143	-70.4864	768.781	851.884	486.492	484.474	868.099	499.308	487.726	888.004	416.763	400.195	924.371	435.292	304.511	884.834	413.519
257	2.56	691.468	1395.15	174.048	734.754	1375.52	99.2738	728.938	1361.09	247.128	802.339	1170.08	8.59953	777.011	1190.46	329.258	701.871	1153.33	154.827	804.767	858.776	-163.411	519.506	884.482	-145.01	534.552	896.935	-61.8575	438.775	905.877	-77.4616	345.873	881.168	-70.4634	768.76	851.882	486.477	484.453	868.113	499.331	487.754	887.893	416.86	400.068	924.446	435.278	304.46	884.853	413.526
258	2.57	691.369	1395.23	174.034	734.738	1375.55	99.2614	728.835	1361.11	247.11	802.353	1170.1	8.59544	777.006	1190.47	329.256	701.852	1153.35	154.801	804.755	858.788	-163.359	519.501	884.489	-145.007	534.534	896.93	-61.8488	438.698	905.891	-77.4262	345.851	881.188	-70.4805	768.75	851.896	486.471	484.474	868.154	499.329	487.924	887.588	417.111	399.922	924.545	435.282	304.413	884.878	413.528
259	2.58	691.509	1395.25	174.009	734.811	1375.58	99.2183	728.828	1361.14	247.116	802.354	1170.09	8.5726	777.014	1190.45	329.226	701.876	1153.31	154.793	804.754	858.809	-163.343	519.534	884.48	-145.025	534.633	896.915	-61.8882	438.79	905.883	-77.4814	345.91	881.179	-70.523	768.766	851.924	486.464	484.432	868.168	499.334	487.806	887.842	416.938	399.779	924.649	435.285	304.413	884.902	413.515
260	2.59	691.573	1395.25	173.999	734.867	1375.58	99.1996	728.845	1361.14	247.111	802.356	1170.09	8.57231	777.02	1190.44	329.206	701.917	1153.28	154.786	804.763	858.826	-163.339	519.564	884.464	-145.046	534.688	896.89	-61.9035	438.898	905.87	-77.5176	345.934	881.18	-70.5242	768.779	851.938	486.456	484.427	868.183	499.365	487.927	887.628	417.128	399.795	924.647	435.295	304.411	884.917	413.503
261	2.6	691.438	1395.32	173.998	734.821	1375.58	99.2291	728.833	1361.13	247.126	802.327	1170.09	8.59233	777.006	1190.42	329.218	701.908	1153.28	154.773	804.764	858.832	-163.308	519.53	884.47	-145.019	534.655	896.887	-61.8796	438.885	905.898	-77.5127	345.886	881.209	-70.49	768.779	851.938	486.453	484.461	868.173	499.345	487.622	888.129	416.724	399.826	924.61	435.322	304.427	884.907	413.524
262	2.61	691.488	1395.29	173.987	734.726	1375.61	99.2463	728.841	1361.14	247.122	802.308	1170.09	8.60791	776.977	1190.42	329.217	701.885	1153.25	154.758	804.745	858.829	-163.302	519.518	884.463	-145.024	534.589	896.893	-61.8605	438.818	905.916	-77.4904	345.849	881.221	-70.4987	768.761	851.918	486.462	484.426	868.149	499.328	487.733	887.947	416.863	399.865	924.575	435.318	304.427	884.895	413.537
263	2.62	691.581	1395.24	173.948	734.755	1375.6	99.2231	728.86	1361.14	247.115	802.348	1170.1	8.6222	776.985	1190.43	329.235	701.893	1153.23	154.771	804.781	858.845	-163.297	519.526	884.473	-145.03	534.606	896.871	-61.8748	438.861	905.925	-77.4953	345.86	881.231	-70.5065	768.755	851.893	486.471	484.441	868.143	499.321	487.928	887.605	417.141	399.958	924.524	435.303	304.478	884.866	413.523
264	2.63	691.593	1395.23	173.951	734.854	1375.58	99.1985	728.919	1361.12	247.117	802.383	1170.1	8.64549	776.996	1190.42	329.26	701.875	1153.24	154.788	804.831	858.847	-163.329	519.542	884.476	-145.038	534.652	896.868	-61.8918	438.885	905.947	-77.4894	345.837	881.242	-70.4811	768.783	851.868	486.449	484.485	868.133	499.309	487.663	888.06	416.716	400.156	924.408	435.301	304.504	884.846	413.518
265	2.64	691.455	1395.28	174.002	734.816	1375.59	99.2241	728.946	1361.13	247.14	802.376	1170.09	8.65219	777.005	1190.41	329.272	701.791	1153.24	154.821	804.864	858.831	-163.346	519.517	884.481	-145.02	534.583	896.859	-61.8459	438.806	905.979	-77.4416	345.823	881.264	-70.4748	768.79	851.825	486.441	484.424	868.084	499.318	487.793	887.873	416.875	400.238	924.332	435.315	304.511	884.829	413.522
266	2.65	691.318	1395.32	174.019	734.734	1375.61	99.2313	728.9	1361.12	247.156	802.386	1170.1	8.65679	776.997	1190.4	329.269	701.791	1153.25	154.836	804.87	858.819	-163.358	519.505	884.462	-145.001	534.591	896.844	-61.8573	438.805	905.989	-77.4107	345.855	881.263	-70.4655	768.767	851.783	486.448	484.422	868.047	499.316	488.207	887.278	417.447	400.213	924.363	435.311	304.519	884.827	413.533
267	2.66	691.413	1395.31	174.026	734.741	1375.62	99.2387	728.914	1361.12	247.141	802.399	1170.09	8.65102	776.992	1190.37	329.253	701.858	1153.22	154.841	804.875	858.838	-163.359	519.534	884.438	-145.014	534.703	896.79	-61.9021	438.896	905.977	-77.4514	345.887	881.24	-70.4594	768.788	851.782	486.443	484.474	868.054	499.295	488.122	887.408	417.296	400.205	924.373	435.296	304.544	884.834	413.528
268	2.67	691.552	1395.27	174.017	734.794	1375.6	99.2318	728.905	1361.12	247.11	802.366	1170.06	8.63407	776.971	1190.33	329.229	701.885	1153.17	154.837	804.879	858.843	-163.382	519.56	884.403	-145.027	534.778	896.73	-61.9132	438.993	905.957	-77.5036	345.964	881.213	-70.4847	768.802	851.798	486.422	484.462	868.07	499.305	487.722	888.005	416.754	400.129	924.435	435.289	304.52	884.837	413.522
269	2.68	691.462	1395.31	174.007	734.765	1375.59	99.241	728.884	1361.14	247.101	802.335	1170.06	8.63718	776.965	1190.33	329.215	701.888	1153.16	154.828	804.858	858.817	-163.398	519.566	884.375	-145.039	534.83	896.689	-61.9325	439.06	905.956	-77.5213	345.979	881.19	-70.5032	768.797	851.808	486.407	484.418	868.078	499.315	487.782	887.889	416.865	400.067	924.475	435.273	304.472	884.859	413.509
270	2.69	691.396	1395.34	174.008	734.766	1375.59	99.2243	728.886	1361.16	247.122	802.323	1170.06	8.65005	776.974	1190.33	329.22	701.858	1153.2	154.827	804.832	858.808	-163.397	519.578	884.354	-145.046	534.85	896.646	-61.9487	439.079	905.982	-77.5022	346	881.184	-70.4977	768.767	851.795	486.407	484.424	868.094	499.318	488.1	887.294	417.355	399.941	924.549	435.284	304.441	884.883	413.51
271	2.7	691.516	1395.33	174.022	734.816	1375.6	99.2225	728.882	1361.18	247.122	802.316	1170.05	8.65203	776.976	1190.33	329.224	701.82	1153.23	154.835	804.841	858.779	-163.373	519.604	884.35	-145.057	534.895	896.59	-61.9605	439.115	906.007	-77.4851	345.987	881.196	-70.4821	768.762	851.793	486.411	484.424	868.116	499.316	488.16	887.15	417.468	399.908	924.59	435.338	304.434	884.884	413.509
272	2.71	691.535	1395.34	174.041	734.861	1375.6	99.2227	728.915	1361.17	247.119	802.319	1170.05	8.66016	776.984	1190.33	329.212	701.834	1153.21	154.835	804.9	858.752	-163.343	519.62	884.348	-145.064	534.911	896.544	-61.9539	439.159	906.002	-77.4837	346.021	881.193	-70.4951	768.765	851.763	486.41	484.371	868.112	499.313	488.173	887.103	417.515	399.873	924.587	435.291	304.459	884.884	413.503
273	2.72	691.441	1395.38	174.057	734.867	1375.62	99.2219	728.927	1361.16	247.151	802.316	1170.06	8.66308	776.98	1190.34	329.207	701.766	1153.24	154.814	804.989	858.716	-163.303	519.598	884.337	-145.064	534.919	896.512	-61.9505	439.094	906.052	-77.4444	346.078	881.195	-70.5143	768.769	851.752	486.42	484.377	868.097	499.316	488.034	887.358	417.301	399.954	924.499	435.249	304.498	884.874	413.499
274	2.73	691.438	1395.44	174.103	734.835	1375.62	99.2332	728.931	1361.15	247.203	802.296	1170.07	8.67962	777.006	1190.35	329.232	701.775	1153.25	154.822	805.034	858.654	-163.276	519.61	884.314	-145.041	534.906	896.469	-61.9203	439.083	906.086	-77.3867	346.058	881.207	-70.498	768.779	851.742	486.449	484.458	868.082	499.336	487.846	887.703	417.023	400.069	924.425	435.288	304.526	884.855	413.528
275	2.74	691.527	1395.43	174.116	734.853	1375.62	99.2534	728.998	1361.14	247.239	802.31	1170.07	8.69244	777.04	1190.35	329.243	701.84	1153.25	154.834	805.086	858.606	-163.238	519.646	884.276	-145.022	534.943	896.422	-61.9107	439.183	906.094	-77.3631	346.09	881.211	-70.4632	768.805	851.739	486.451	484.511	868.08	499.336	488.033	887.489	417.211	400.21	924.386	435.298	304.546	884.835	413.547
276	2.75	691.626	1395.37	174.126	734.893	1375.62	99.2502	729.033	1361.15	247.234	802.316	1170.07	8.69584	777.029	1190.33	329.225	701.861	1153.22	154.825	805.15	858.567	-163.176	519.7	884.213	-145.006	535.015	896.378	-61.9195	439.324	906.105	-77.3645	346.159	881.198	-70.4495	768.81	851.748	486.441	484.502	868.075	499.331	487.917	887.738	416.994	400.285	924.352	435.287	304.579	884.832	413.539
277	2.76	691.483	1395.42	174.161	734.86	1375.64	99.252	729.007	1361.16	247.238	802.313	1170.04	8.67366	776.995	1190.32	329.231	701.835	1153.21	154.835	805.182	858.514	-163.115	519.723	884.158	-145.001	535.05	896.312	-61.9109	439.401	906.1	-77.3618	346.196	881.167	-70.4459	768.8	851.762	486.448	484.435	868.025	499.336	488.035	887.499	417.182	400.193	924.355	435.305	304.551	884.84	413.541
278	2.77	691.47	1395.44	174.185	734.819	1375.66	99.2798	728.997	1361.18	247.246	802.288	1170.03	8.66639	776.976	1190.31	329.247	701.848	1153.19	154.858	805.205	858.474	-163.071	519.748	884.116	-145.004	535.078	896.262	-61.8986	439.413	906.132	-77.3212	346.184	881.188	-70.4062	768.787	851.771	486.465	484.436	868.053	499.352	487.632	888.017	416.732	400.097	924.408	435.343	304.503	884.855	413.538
279	2.78	691.547	1395.41	174.17	734.819	1375.66	99.2798	728.971	1361.21	247.223	802.228	1170.04	8.655	776.975	1190.29	329.255	701.886	1153.16	154.854	805.213	858.432	-163.038	519.816	884.062	-144.996	535.111	896.202	-61.8851	439.483	906.185	-77.2825	346.234	881.184	-70.3975	768.789	851.807	486.448	484.395	868.08	499.365	487.659	887.881	416.839	399.971	924.495	435.364	304.478	884.873	413.531
280	2.79	691.602	1395.38	174.113	734.886	1375.66	99.2275	728.909	1361.23	247.195	802.187	1170.03	8.64566	776.979	1190.29	329.247	701.902	1153.14	154.832	805.273	858.404	-162.994	519.868	884.01	-145.003	535.161	896.135	-61.9089	439.559	906.208	-77.2873	346.294	881.176	-70.3896	768.816	851.834	486.436	484.365	868.127	499.356	487.945	887.274	417.327	399.915	924.557	435.356	304.423	884.898	413.51
281	2.8	691.531	1395.38	174.107	734.839	1375.64	99.2208	728.922	1361.25	247.188	802.138	1170.03	8.64607	776.96	1190.31	329.241	701.886	1153.15	154.842	805.306	858.328	-162.971	519.902	883.973	-145.006	535.253	896.073	-61.9522	439.674	906.239	-77.2924	346.375	881.175	-70.397	768.778	851.807	486.445	484.357	868.118	499.364	488.037	887.132	417.455	399.806	924.612	435.351	304.393	884.906	413.493
282	2.81	691.453	1395.42	174.139	734.74	1375.66	99.24	728.968	1361.27	247.219	802.107	1170.05	8.67084	776.968	1190.32	329.264	701.836	1153.19	154.887	805.375	858.244	-162.951	519.929	883.951	-144.981	535.296	896.001	-61.9156	439.788	906.305	-77.2489	346.404	881.181	-70.375	768.732	851.751	486.449	484.363	868.092	499.341	488.1	887.119	417.51	399.781	924.612	435.33	304.415	884.906	413.511
283	2.82	691.455	1395.44	174.144	734.78	1375.66	99.2426	729.027	1361.28	247.262	802.122	1170.06	8.67908	776.989	1190.33	329.298	701.834	1153.23	154.941	805.441	858.106	-162.907	519.982	883.919	-144.952	535.336	895.918	-61.8679	439.88	906.408	-77.1813	346.487	881.182	-70.3144	768.78	851.719	486.439	484.403	868.088	499.337	488.004	887.418	417.297	399.751	924.634	435.341	304.475	884.896	413.532
284	2.83	691.585	1395.44	174.1	734.84	1375.65	99.2235	729.089	1361.27	247.278	802.141	1170.06	8.67826	777.028	1190.32	329.31	701.879	1153.26	154.951	805.533	857.965	-162.856	520.079	883.873	-144.953	535.343	895.843	-61.8147	439.993	906.49	-77.1212	346.594	881.187	-70.2901	768.818	851.685	486.441	484.49	868.095	499.331	487.851	887.741	417.011	399.874	924.586	435.333	304.539	884.871	413.525
285	2.84	691.598	1395.44	174.081	734.872	1375.65	99.1911	729.12	1361.25	247.284	802.16	1170.04	8.66118	777.079	1190.27	329.305	701.923	1153.28	154.963	805.63	857.806	-162.816	520.179	883.809	-144.958	535.415	895.756	-61.8171	440.105	906.521	-77.0623	346.732	881.189	-70.3141	768.834	851.632	486.418	484.524	868.081	499.317	488.024	887.506	417.175	400.093	924.481	435.297	304.592	884.858	413.506
286	2.85	691.576	1395.47	174.109	734.842	1375.66	99.1992	729.143	1361.24	247.328	802.151	1170.03	8.65088	777.1	1190.23	329.309	701.988	1153.31	154.983	805.721	857.671	-162.77	520.264	883.745	-144.955	535.5	895.65	-61.8151	440.254	906.548	-77.0024	346.894	881.185	-70.2996	768.832	851.565	486.405	484.531	868.051	499.316	487.754	888.02	416.738	400.334	924.346	435.285	304.627	884.853	413.511
287	2.86	691.644	1395.44	174.14	734.926	1375.65	99.2005	729.123	1361.23	247.369	802.15	1170.03	8.66811	777.132	1190.2	329.32	702.039	1153.32	155.023	805.818	857.59	-162.746	520.359	883.682	-144.919	535.602	895.526	-61.7649	440.38	906.58	-76.9101	346.978	881.15	-70.2334	768.834	851.522	486.382	484.535	868.05	499.324	487.84	887.839	416.902	400.334	924.345	435.334	304.635	884.853	413.512
288	2.87	691.714	1395.38	174.165	734.98	1375.64	99.2084	729.14	1361.2	247.389	802.145	1170.01	8.66891	777.153	1190.17	329.336	702.06	1153.31	155.036	805.95	857.525	-162.675	520.484	883.593	-144.905	535.713	895.363	-61.7335	440.517	906.606	-76.8313	347.094	881.12	-70.1863	768.819	851.495	486.36	484.524	868.036	499.319	487.992	887.472	417.162	400.379	924.291	435.358	304.595	884.853	413.498
289	2.88	691.79	1395.33	174.19	734.963	1375.63	99.2325	729.134	1361.2	247.431	802.118	1169.99	8.66136	777.166	1190.15	329.329	702.097	1153.3	155.065	806.048	857.448	-162.592	520.611	883.488	-144.908	535.822	895.141	-61.7102	440.642	906.634	-76.7621	347.219	881.112	-70.144	768.828	851.482	486.355	484.477	868.007	499.313	487.652	887.966	416.713	400.31	924.317	435.312	304.566	884.841	413.492
290	2.89	691.703	1395.33	174.274	734.957	1375.63	99.2946	729.124	1361.2	247.521	802.08	1169.96	8.67641	777.189	1190.13	329.35	702.14	1153.3	155.118	805.963	857.148	-162.685	520.704	883.405	-144.859	535.86	894.907	-61.6394	440.802	906.696	-76.665	347.314	881.102	-70.0673	768.816	851.473	486.344	484.457	868.01	499.314	487.596	888.116	416.593	400.139	924.419	435.302	304.537	884.853	413.514
291	2.9	691.719	1395.3	174.38	735.026	1375.63	99.3952	729.116	1361.18	247.61	802.064	1169.95	8.69616	777.213	1190.1	329.388	702.228	1153.29	155.206	805.673	856.596	-162.946	520.84	883.328	-144.823	535.91	894.681	-61.5544	440.995	906.766	-76.5833	347.469	881.083	-69.9999	768.807	851.447	486.332	484.426	868.004	499.317	487.747	887.887	416.833	400.087	924.462	435.359	304.511	884.873	413.541
292	2.91	691.905	1395.28	174.458	735.037	1375.65	99.5023	729.143	1361.18	247.683	802.049	1169.94	8.69954	777.25	1190.09	329.405	702.278	1153.31	155.237	805.881	856.608	-162.763	520.982	883.246	-144.816	535.991	894.486	-61.5	441.126	906.845	-76.5071	347.602	881.082	-69.9773	768.812	851.428	486.324	484.419	868.015	499.321	487.988	887.531	417.117	400.053	924.512	435.364	304.508	884.898	413.529
293	2.92	691.895	1395.31	174.581	735.01	1375.69	99.5717	729.174	1361.17	247.769	802.029	1169.94	8.69082	777.282	1190.08	329.415	702.266	1153.34	155.244	806.242	856.748	-162.448	521.1	883.179	-144.81	535.973	894.316	-61.437	441.224	906.958	-76.4599	347.757	881.076	-69.9908	768.829	851.416	486.304	484.444	868.028	499.324	487.834	887.737	416.926	400.067	924.528	435.348	304.55	884.901	413.522
294	2.93	691.785	1395.38	174.693	735.038	1375.73	99.6311	729.23	1361.12	247.883	802.018	1169.93	8.70277	777.299	1190.07	329.421	702.24	1153.38	155.26	806.065	856.246	-162.582	521.195	883.114	-144.823	535.992	894.199	-61.3995	441.317	907.047	-76.4349	347.87	881.102	-69.988	768.83	851.397	486.289	484.463	868.04	499.34	488.149	887.197	417.387	400.111	924.498	435.337	304.571	884.909	413.515
295	2.94	691.652	1395.47	174.884	735.07	1375.76	99.7091	729.297	1361.1	248.005	802.005	1169.91	8.71297	777.331	1190.07	329.448	702.251	1153.42	155.281	806.056	856.007	-162.478	521.314	883.051	-144.806	536.072	894.117	-61.404	441.396	907.165	-76.4079	347.997	881.137	-69.9542	768.842	851.373	486.295	484.506	868.034	499.337	488.304	887.071	417.569	400.191	924.456	435.362	304.605	884.919	413.525
296	2.95	691.674	1395.42	175.01	735.09	1375.79	99.7803	729.362	1361.07	248.093	801.992	1169.88	8.71088	777.351	1190.05	329.45	702.292	1153.46	155.265	806.15	855.87	-162.36	521.424	882.966	-144.817	536.164	894.016	-61.4264	441.539	907.273	-76.4016	348.146	881.146	-69.9466	768.861	851.338	486.292	484.558	868.012	499.349	488.368	887.051	417.598	400.272	924.458	435.31	304.649	884.905	413.514
297	2.96	691.747	1395.37	175.093	735.137	1375.81	99.8654	729.418	1361.03	248.171	801.986	1169.84	8.69915	777.363	1190.01	329.437	702.319	1153.45	155.265	806.238	855.733	-162.23	521.534	882.852	-144.833	536.162	893.793	-61.4164	441.629	907.363	-76.37	348.257	881.123	-69.9707	768.883	851.325	486.302	484.495	867.947	499.331	488.352	887.005	417.583	400.254	924.439	435.31	304.641	884.88	413.503
298	2.97	691.84	1395.36	175.228	735.126	1375.8	99.9597	729.468	1360.98	248.266	801.94	1169.81	8.69754	777.385	1189.99	329.446	702.372	1153.44	155.302	806.374	855.636	-162.092	521.68	882.713	-144.824	536.21	893.472	-61.3944	441.736	907.391	-76.3278	348.409	881.091	-69.9466	768.871	851.311	486.305	484.447	867.923	499.316	488.347	886.975	417.562	400.225	924.434	435.321	304.646	884.865	413.52
299	2.98	691.859	1395.35	175.425	735.167	1375.8	100.065	729.532	1360.97	248.385	801.932	1169.77	8.71526	777.402	1189.96	329.487	702.453	1153.44	155.375	806.542	855.545	-161.968	521.829	882.571	-144.791	536.312	893.269	-61.3306	441.886	907.428	-76.2735	348.584	881.066	-69.8594	768.872	851.319	486.322	484.424	867.907	499.332	488.206	887.251	417.334	400.247	924.396	435.369	304.642	884.854	413.54
300	2.99	691.926	1395.34	175.542	735.171	1375.81	100.163	729.64	1360.96	248.492	801.926	1169.73	8.72087	777.412	1189.94	329.512	702.558	1153.4	155.427	806.689	855.459	-161.868	521.958	882.448	-144.775	536.444	893.098	-61.3353	442.043	907.48	-76.2562	348.735	881.043	-69.8155	768.891	851.323	486.327	484.462	867.922	499.341	487.824	887.897	416.787	400.182	924.436	435.41	304.623	884.856	413.546
301	3	692.004	1395.33	175.603	735.138	1375.83	100.189	729.696	1360.94	248.571	801.885	1169.7	8.70626	777.398	1189.92	329.506	702.583	1153.44	155.45	806.81	855.389	-161.792	522.09	882.342	-144.79	536.58	892.933	-61.3795	442.211	907.539	-76.2608	348.867	881.019	-69.8357	768.864	851.294	486.316	484.444	867.943	499.353	487.828	887.789	416.891	400.208	924.427	435.391	304.624	884.868	413.526
302	3.01	691.898	1395.39	175.713	735.205	1375.83	100.193	729.73	1360.95	248.651	801.848	1169.69	8.69682	777.388	1189.91	329.516	702.545	1153.47	155.472	806.939	855.312	-161.708	522.207	882.264	-144.81	536.695	892.785	-61.4013	442.377	907.625	-76.2489	349.035	881.017	-69.8396	768.846	851.284	486.318	484.402	867.953	499.364	488.019	887.486	417.154	400.211	924.414	435.387	304.611	884.886	413.505
303	3.02	691.803	1395.42	175.84	735.27	1375.83	100.221	729.761	1360.96	248.74	801.817	1169.67	8.72513	777.391	1189.93	329.554	702.567	1153.52	155.538	807.084	855.231	-161.621	522.291	882.201	-144.807	536.798	892.673	-61.3881	442.545	907.726	-76.2181	349.125	881.047	-69.7853	768.835	851.261	486.338	484.433	867.983	499.376	487.699	887.977	416.748	400.125	924.46	435.414	304.586	884.897	413.521
304	3.03	691.805	1395.38	175.898	735.304	1375.82	100.249	729.791	1360.97	248.828	801.778	1169.65	8.75472	777.403	1189.95	329.594	702.566	1153.56	155.571	807.189	855.162	-161.577	522.371	882.135	-144.796	536.918	892.551	-61.407	442.661	907.807	-76.2048	349.179	881.052	-69.7194	768.836	851.227	486.346	484.495	867.988	499.353	487.768	887.821	416.919	400.167	924.434	435.435	304.586	884.899	413.525
305	3.04	691.786	1395.38	175.932	735.327	1375.83	100.248	729.797	1360.97	248.877	801.726	1169.62	8.74184	777.369	1189.92	329.606	702.571	1153.55	155.587	807.315	855.094	-161.555	522.433	882.065	-144.803	536.932	892.48	-61.3959	442.737	907.87	-76.203	349.28	881.06	-69.7289	768.81	851.187	486.344	484.454	867.892	499.333	488.022	887.474	417.187	400.137	924.453	435.386	304.622	884.891	413.531
306	3.05	691.794	1395.37	175.966	735.336	1375.81	100.288	729.833	1360.93	248.923	801.675	1169.57	8.73359	777.346	1189.86	329.626	702.653	1153.55	155.638	807.434	855.029	-161.512	522.509	881.997	-144.81	536.904	892.46	-61.349	442.906	907.909	-76.2199	349.46	881.039	-69.755	768.783	851.146	486.375	484.398	867.829	499.335	487.963	887.654	417.014	400.194	924.429	435.354	304.652	884.87	413.528
307	3.06	691.701	1395.41	176.062	735.305	1375.83	100.365	729.875	1360.91	249.015	801.633	1169.52	8.7445	777.338	1189.82	329.672	702.765	1153.53	155.713	807.543	854.973	-161.484	522.578	881.944	-144.814	537.047	892.38	-61.3564	443.033	907.948	-76.1849	349.564	881.026	-69.7112	768.805	851.129	486.418	484.399	867.834	499.352	488.321	887.09	417.489	400.286	924.356	435.405	304.663	884.856	413.534
308	3.07	691.636	1395.4	176.108	735.24	1375.85	100.439	729.867	1360.91	249.072	801.57	1169.49	8.73973	777.322	1189.8	329.704	702.769	1153.55	155.744	807.761	855.105	-161.308	522.627	881.884	-144.835	537.129	892.3	-61.385	443.046	907.984	-76.1779	349.639	881.028	-69.6965	768.791	851.101	486.44	484.39	867.839	499.368	488.372	886.924	417.616	400.399	924.334	435.411	304.669	884.858	413.538
309	3.08	691.578	1395.39	176.13	735.232	1375.87	100.462	729.812	1360.89	249.094	801.48	1169.46	8.73257	777.296	1189.76	329.695	702.805	1153.56	155.743	808.009	855.296	-161.095	522.675	881.827	-144.904	537.234	892.265	-61.5044	443.041	908.028	-76.2202	349.698	881.027	-69.724	768.755	851.062	486.461	484.385	867.831	499.352	488.37	886.848	417.617	400.438	924.333	435.401	304.641	884.867	413.514
310	3.09	691.487	1395.4	176.191	735.228	1375.9	100.486	729.76	1360.87	249.135	801.431	1169.44	8.7389	777.295	1189.75	329.703	702.864	1153.56	155.766	807.982	855.164	-161.223	522.718	881.792	-144.94	537.331	892.246	-61.5966	443.076	908.068	-76.2801	349.766	881.035	-69.7625	768.727	851.039	486.48	484.412	867.838	499.34	488.373	886.827	417.597	400.357	924.419	435.357	304.656	884.877	413.493
311	3.1	691.45	1395.39	176.292	735.156	1375.91	100.587	729.752	1360.86	249.225	801.39	1169.42	8.77628	777.283	1189.75	329.756	702.863	1153.57	155.859	808.115	855.296	-161.065	522.73	881.786	-144.937	537.368	892.293	-61.6124	443.109	908.134	-76.2762	349.781	881.047	-69.7316	768.726	851.041	486.481	484.4	867.863	499.35	488.198	887.143	417.375	400.353	924.418	435.402	304.68	884.877	413.504
312	3.11	691.364	1395.35	176.389	735.057	1375.92	100.68	729.699	1360.83	249.309	801.313	1169.43	8.81341	777.257	1189.75	329.813	702.443	1153.89	156.027	807.873	854.945	-161.338	522.701	881.78	-144.948	537.325	892.366	-61.5811	443.102	908.199	-76.2698	349.779	881.078	-69.7077	768.746	851.043	486.494	484.356	867.858	499.38	487.938	887.559	417.068	400.22	924.442	435.475	304.623	884.9	413.528
313	3.12	691.29	1395.27	176.451	735.016	1375.9	100.718	729.631	1360.8	249.374	801.239	1169.43	8.84237	777.234	1189.73	329.831	701.487	1154.59	156.351	807.836	854.847	-161.402	522.691	881.769	-144.984	537.225	892.404	-61.5727	443.102	908.222	-76.3058	349.768	881.085	-69.7213	768.725	851.031	486.496	484.289	867.831	499.384	488.173	887.102	417.478	400.138	924.472	435.46	304.592	884.9	413.527
314	3.13	691.325	1395.15	176.513	734.981	1375.88	100.776	729.583	1360.75	249.425	801.236	1169.4	8.84266	777.22	1189.7	329.838	701.7	1154.44	156.312	807.822	854.818	-161.407	522.69	881.734	-145.009	537.297	892.383	-61.6607	443.116	908.244	-76.3431	349.82	881.074	-69.7497	768.738	851.029	486.486	484.264	867.814	499.38	488.239	886.967	417.585	400.096	924.483	435.457	304.597	884.898	413.515
315	3.14	691.359	1395.09	176.6	734.886	1375.86	100.871	729.584	1360.7	249.491	801.2	1169.37	8.8594	777.222	1189.67	329.88	702.226	1154.08	156.195	807.833	854.791	-161.382	522.705	881.695	-144.999	537.389	892.38	-61.7141	443.122	908.272	-76.3338	349.856	881.058	-69.729	768.723	851.015	486.476	484.251	867.781	499.383	488.264	886.945	417.629	400.124	924.474	435.502	304.607	884.9	413.534
316	3.15	691.158	1395.11	176.741	734.78	1375.88	100.996	729.561	1360.68	249.559	801.165	1169.37	8.87949	777.209	1189.65	329.917	701.95	1154.32	156.355	807.848	854.773	-161.367	522.708	881.672	-144.99	537.346	892.386	-61.673	443.098	908.287	-76.3161	349.851	881.039	-69.7199	768.719	850.984	486.475	484.298	867.772	499.394	488.278	886.91	417.657	400.156	924.5	435.528	304.623	884.902	413.568
317	3.16	691.116	1395.07	176.793	734.717	1375.86	101.034	729.514	1360.63	249.598	801.139	1169.37	8.88232	777.206	1189.61	329.914	702.767	1153.77	156.101	807.844	854.742	-161.349	522.72	881.649	-145.031	537.375	892.35	-61.7076	443.102	908.288	-76.3504	349.822	881.031	-69.7546	768.712	850.929	486.463	484.312	867.773	499.387	488.314	886.875	417.651	400.211	924.509	435.481	304.639	884.892	413.573
318	3.17	690.995	1394.98	176.829	734.651	1375.84	101.038	729.473	1360.58	249.631	801.134	1169.34	8.85597	777.19	1189.59	329.901	702.978	1153.62	156.044	807.868	854.715	-161.336	522.726	881.643	-145.074	537.449	892.306	-61.8029	443.131	908.29	-76.3986	349.848	881.016	-69.8167	768.717	850.895	486.453	484.3	867.755	499.376	488.345	886.821	417.631	400.228	924.468	435.458	304.638	884.885	413.531
319	3.18	690.907	1394.93	176.906	734.588	1375.84	101.092	729.419	1360.53	249.689	801.084	1169.33	8.86928	777.198	1189.58	329.915	702.589	1153.94	156.201	807.884	854.684	-161.302	522.751	881.636	-145.082	537.437	892.325	-61.793	443.178	908.295	-76.4436	349.875	881.018	-69.8225	768.709	850.858	486.449	484.357	867.752	499.379	488.346	886.788	417.619	400.287	924.434	435.459	304.656	884.887	413.517
320	3.19	690.774	1394.85	176.97	734.509	1375.81	101.159	729.327	1360.5	249.755	801.037	1169.35	8.90177	777.2	1189.58	329.952	702.052	1154.37	156.406	807.893	854.66	-161.258	522.726	881.658	-145.058	537.355	892.39	-61.7207	443.11	908.304	-76.4154	349.869	881.013	-69.784	768.711	850.824	486.45	484.419	867.766	499.379	488.361	886.772	417.641	400.282	924.426	435.491	304.669	884.881	413.526
321	3.2	690.696	1394.74	177.019	734.382	1375.77	101.197	729.247	1360.48	249.803	801.018	1169.36	8.92625	777.165	1189.59	329.975	702.772	1153.81	156.187	807.886	854.627	-161.212	522.712	881.668	-145.046	537.235	892.414	-61.6574	443.08	908.305	-76.3915	349.864	881.012	-69.7933	768.733	850.826	486.453	484.388	867.744	499.377	488.396	886.781	417.668	400.305	924.388	435.476	304.66	884.868	413.537
322	3.21	690.687	1394.59	177.033	734.267	1375.72	101.226	729.151	1360.42	249.835	801.018	1169.37	8.9449	777.156	1189.56	329.993	703.03	1153.66	156.151	807.934	854.629	-161.195	522.728	881.644	-145.038	537.204	892.392	-61.6432	443.124	908.295	-76.4033	349.885	881.008	-69.8108	768.734	850.826	486.447	484.366	867.725	499.387	488.394	886.777	417.656	400.341	924.379	435.444	304.661	884.869	413.529
323	3.22	690.696	1394.48	177.061	734.169	1375.7	101.271	729.071	1360.38	249.874	801.033	1169.38	8.95522	777.152	1189.55	330.012	703.151	1153.6	156.179	807.913	854.622	-161.165	522.738	881.612	-145.028	537.284	892.36	-61.6304	443.164	908.304	-76.3884	349.927	880.985	-69.8006	768.72	850.821	486.426	484.341	867.688	499.361	488.335	886.815	417.637	400.327	924.399	435.464	304.676	884.866	413.531
324	3.23	690.691	1394.4	177.079	734.03	1375.72	101.345	728.992	1360.35	249.907	801.033	1169.38	8.98397	777.167	1189.57	330.041	703.227	1153.58	156.215	807.913	854.627	-161.145	522.743	881.608	-145.004	537.312	892.35	-61.6161	443.138	908.308	-76.3796	349.895	880.986	-69.7498	768.718	850.826	486.439	484.288	867.675	499.368	488.317	886.846	417.652	400.4	924.371	435.496	304.66	884.881	413.557
325	3.24	690.507	1394.32	177.093	733.899	1375.72	101.372	728.847	1360.3	249.923	800.999	1169.4	9.00505	777.151	1189.57	330.059	703.284	1153.58	156.206	807.932	854.652	-161.132	522.765	881.622	-145.007	537.325	892.353	-61.6391	443.103	908.308	-76.3927	349.869	881.001	-69.749	768.748	850.847	486.457	484.288	867.701	499.373	488.323	886.84	417.653	400.285	924.483	435.478	304.629	884.907	413.555
326	3.25	690.414	1394.25	177.103	733.872	1375.7	101.359	728.738	1360.27	249.918	800.976	1169.4	9.01804	777.106	1189.55	330.048	702.786	1153.94	156.322	807.947	854.662	-161.104	522.775	881.618	-145.033	537.301	892.353	-61.6735	443.101	908.316	-76.4353	349.863	881.01	-69.7998	768.744	850.848	486.455	484.246	867.71	499.373	488.261	886.824	417.618	400.166	924.527	435.422	304.607	884.923	413.524
327	3.26	690.392	1394.2	177.105	733.83	1375.69	101.36	728.659	1360.25	249.944	801.001	1169.41	9.0128	777.097	1189.54	330.039	701.733	1154.71	156.643	807.927	854.655	-161.065	522.776	881.598	-145.055	537.313	892.355	-61.712	443.105	908.313	-76.4761	349.866	881.015	-69.8114	768.731	850.844	486.45	484.262	867.726	499.388	488.279	886.807	417.608	400.219	924.46	435.399	304.594	884.927	413.52
328	3.27	690.405	1394.09	177.1	733.678	1375.68	101.39	728.562	1360.21	249.961	800.993	1169.42	9.02941	777.089	1189.54	330.057	701.927	1154.56	156.613	807.928	854.627	-161.02	522.736	881.594	-145.064	537.325	892.394	-61.7202	443.104	908.325	-76.5001	349.857	881.028	-69.8057	768.705	850.828	486.466	484.245	867.705	499.383	488.311	886.804	417.613	400.28	924.453	435.438	304.6	884.904	413.533
329	3.28	690.353	1393.97	177.126	733.584	1375.65	101.401	728.452	1360.18	249.989	800.98	1169.42	9.06974	777.086	1189.54	330.083	702.882	1153.87	156.328	807.944	854.598	-160.969	522.726	881.605	-145.05	537.298	892.424	-61.6955	443.121	908.344	-76.5329	349.856	881.033	-69.8168	768.733	850.842	486.491	484.22	867.682	499.378	488.313	886.766	417.636	400.302	924.398	435.462	304.6	884.895	413.543
330	3.29	690.323	1393.89	177.151	733.537	1375.61	101.396	728.392	1360.13	250.009	800.968	1169.42	9.08159	777.09	1189.52	330.086	703.135	1153.7	156.255	807.946	854.555	-160.929	522.702	881.616	-145.04	537.224	892.442	-61.6578	443.107	908.334	-76.5165	349.813	881.028	-69.8288	768.72	850.819	486.506	484.27	867.67	499.38	488.268	886.731	417.646	400.343	924.332	435.485	304.622	884.876	413.539
331	3.3	690.329	1393.81	177.158	733.505	1375.6	101.375	728.361	1360.1	250.011	800.978	1169.43	9.09253	777.112	1189.52	330.098	703.244	1153.63	156.256	808.003	854.529	-160.925	522.708	881.615	-145.037	537.229	892.439	-61.6603	443.108	908.343	-76.4914	349.827	881.036	-69.8375	768.702	850.795	486.523	484.273	867.652	499.388	488.321	886.734	417.672	400.392	924.303	435.489	304.675	884.848	413.543
332	3.31	690.21	1393.81	177.144	733.393	1375.6	101.4	728.323	1360.08	250.008	800.996	1169.43	9.12329	777.113	1189.52	330.102	703.328	1153.61	156.281	808.026	854.525	-160.899	522.771	881.617	-145.049	537.295	892.449	-61.6685	443.115	908.356	-76.4882	349.889	881.018	-69.8428	768.722	850.781	486.552	484.292	867.634	499.404	488.392	886.737	417.702	400.414	924.305	435.51	304.742	884.844	413.553
333	3.32	690.157	1393.8	177.153	733.293	1375.59	101.409	728.196	1360.08	250.006	800.999	1169.45	9.15266	777.083	1189.51	330.102	703.302	1153.62	156.292	807.977	854.553	-160.881	522.768	881.634	-145.04	537.248	892.498	-61.6547	443.081	908.36	-76.5014	349.862	881.022	-69.8344	768.709	850.78	486.567	484.368	867.659	499.438	488.343	886.74	417.682	400.374	924.371	435.501	304.729	884.857	413.571
334	3.33	690.033	1393.78	177.144	733.284	1375.59	101.366	728.05	1360.08	249.994	800.99	1169.46	9.14787	777.061	1189.51	330.082	703.259	1153.64	156.251	807.93	854.573	-160.861	522.768	881.631	-145.053	537.237	892.514	-61.675	443.074	908.351	-76.5228	349.829	881.03	-69.8561	768.693	850.798	486.569	484.373	867.713	499.448	488.266	886.786	417.668	400.293	924.436	435.512	304.703	884.888	413.562
335	3.34	689.887	1393.75	177.122	733.242	1375.55	101.3	727.936	1360.08	249.95	800.983	1169.48	9.13068	777.034	1189.52	330.053	703.241	1153.65	156.251	807.89	854.626	-160.894	522.795	881.62	-145.093	537.245	892.504	-61.7093	443.066	908.367	-76.5607	349.855	881.029	-69.8967	768.664	850.8	486.567	484.346	867.761	499.43	488.236	886.806	417.617	400.257	924.459	435.495	304.662	884.921	413.535
336	3.35	689.825	1393.69	177.116	733.181	1375.5	101.271	727.87	1360.08	249.92	800.974	1169.49	9.13396	776.995	1189.52	330.04	703.291	1153.63	156.262	807.877	854.68	-160.931	522.774	881.612	-145.1	537.269	892.502	-61.7401	443.08	908.348	-76.5935	349.835	881.019	-69.896	768.625	850.811	486.574	484.257	867.76	499.39	488.242	886.826	417.581	400.208	924.497	435.512	304.623	884.924	413.524
337	3.36	689.805	1393.64	177.114	733.127	1375.47	101.288	727.825	1360.06	249.94	800.983	1169.5	9.1646	776.996	1189.53	330.046	703.346	1153.62	156.269	807.882	854.682	-160.912	522.765	881.597	-145.07	537.236	892.516	-61.6925	443.087	908.329	-76.5748	349.762	881.005	-69.8563	768.622	850.819	486.566	484.194	867.735	499.411	488.257	886.83	417.602	400.073	924.526	435.551	304.593	884.921	413.536
338	3.37	689.766	1393.58	177.11	733.127	1375.44	101.258	727.788	1360.05	249.943	800.981	1169.51	9.18306	777.012	1189.54	330.055	703.348	1153.6	156.281	807.847	854.675	-160.908	522.741	881.586	-145.052	537.229	892.533	-61.656	443.07	908.303	-76.5643	349.769	880.975	-69.8615	768.649	850.832	486.57	484.165	867.723	499.408	488.225	886.807	417.604	400.077	924.492	435.547	304.572	884.901	413.544
339	3.38	689.78	1393.55	177.123	733.028	1375.4	101.254	727.779	1360.05	249.934	801.005	1169.53	9.1879	777.028	1189.54	330.042	703.349	1153.59	156.279	807.841	854.658	-160.911	522.749	881.588	-145.072	537.239	892.553	-61.6595	443.084	908.29	-76.5781	349.829	880.962	-69.8947	768.668	850.834	486.565	484.143	867.708	499.392	488.246	886.809	417.609	400.217	924.381	435.535	304.597	884.889	413.547
340	3.39	689.686	1393.55	177.144	732.975	1375.43	101.262	727.819	1360.06	249.942	801.03	1169.54	9.19101	777.058	1189.54	330.042	702.887	1153.94	156.406	807.845	854.642	-160.894	522.755	881.611	-145.077	537.24	892.589	-61.6622	443.068	908.315	-76.595	349.845	880.976	-69.8854	768.687	850.821	486.561	484.162	867.659	499.378	488.33	886.801	417.668	400.309	924.343	435.532	304.653	884.873	413.558
341	3.4	689.545	1393.62	177.123	732.967	1375.47	101.271	727.796	1360.06	249.937	801.081	1169.56	9.19699	777.097	1189.54	330.031	702.294	1154.38	156.571	807.885	854.633	-160.876	522.754	881.626	-145.081	537.184	892.625	-61.651	443.01	908.352	-76.5937	349.831	880.987	-69.8628	768.678	850.817	486.56	484.239	867.656	499.372	488.195	887.077	417.477	400.389	924.349	435.535	304.676	884.868	413.566
342	3.41	689.452	1393.74	177.09	732.998	1375.5	101.242	727.8	1360.07	249.912	801.126	1169.55	9.18513	777.112	1189.55	329.992	702.542	1154.21	156.45	807.947	854.625	-160.868	522.737	881.653	-145.093	537.17	892.653	-61.6773	442.981	908.373	-76.6335	349.79	881.014	-69.8798	768.712	850.833	486.545	484.322	867.672	499.364	488.005	887.446	417.158	400.403	924.36	435.481	304.706	884.868	413.555
343	3.42	689.539	1393.75	177.049	733.057	1375.51	101.172	727.843	1360.06	249.837	801.151	1169.54	9.1371	777.137	1189.55	329.939	702.2	1154.49	156.521	807.954	854.629	-160.901	522.75	881.663	-145.13	537.245	892.634	-61.7503	443.002	908.377	-76.6988	349.787	881.013	-69.9406	768.718	850.837	486.523	484.355	867.669	499.371	488.309	886.932	417.537	400.473	924.315	435.469	304.742	884.853	413.533
344	3.43	689.595	1393.73	177.047	733.087	1375.52	101.137	727.93	1360.06	249.808	801.156	1169.53	9.09634	777.151	1189.54	329.921	703.055	1153.88	156.249	807.957	854.66	-160.938	522.76	881.679	-145.145	537.271	892.637	-61.7722	443.014	908.372	-76.7219	349.804	881.011	-69.9567	768.713	850.862	486.518	484.356	867.659	499.372	488.359	886.789	417.625	400.47	924.33	435.476	304.747	884.843	413.524
345	3.44	689.848	1393.66	177.063	733.12	1375.52	101.139	727.97	1360.09	249.814	801.166	1169.55	9.10682	777.161	1189.56	329.922	702.858	1154.05	156.341	807.917	854.672	-160.921	522.738	881.678	-145.128	537.258	892.675	-61.7646	442.97	908.347	-76.7054	349.783	880.989	-69.9253	768.741	850.901	486.522	484.363	867.665	499.391	488.318	886.788	417.64	400.31	924.403	435.499	304.692	884.856	413.534
346	3.45	689.89	1393.66	177.074	733.125	1375.51	101.146	728.028	1360.12	249.793	801.166	1169.57	9.10704	777.142	1189.6	329.906	702.413	1154.42	156.508	807.85	854.684	-160.925	522.739	881.656	-145.108	537.247	892.71	-61.7474	442.928	908.32	-76.6709	349.767	880.97	-69.917	768.734	850.932	486.511	484.298	867.695	499.388	488.301	886.823	417.638	400.161	924.466	435.508	304.653	884.861	413.54
347	3.46	689.865	1393.69	177.079	733.178	1375.52	101.132	728.088	1360.17	249.759	801.192	1169.58	9.07307	777.133	1189.64	329.886	702.756	1154.22	156.402	807.845	854.712	-160.956	522.733	881.665	-145.112	537.264	892.762	-61.7272	442.962	908.309	-76.7002	349.796	880.976	-69.9415	768.725	850.965	486.495	484.243	867.718	499.387	488.298	886.862	417.626	400.132	924.464	435.475	304.664	884.87	413.539
348	3.47	689.951	1393.76	177.057	733.211	1375.55	101.108	728.161	1360.23	249.733	801.195	1169.58	9.06201	777.131	1189.66	329.873	702.48	1154.48	156.484	807.849	854.696	-160.961	522.735	881.679	-145.113	537.294	892.798	-61.714	442.971	908.332	-76.7132	349.774	880.981	-69.9172	768.705	850.978	486.491	484.246	867.736	499.384	488.28	886.872	417.664	400.175	924.457	435.492	304.657	884.885	413.55
349	3.48	689.978	1393.88	177.036	733.199	1375.55	101.096	728.218	1360.29	249.707	801.188	1169.59	9.06475	777.146	1189.7	329.871	703.121	1153.96	156.261	807.851	854.673	-160.955	522.769	881.684	-145.095	537.274	892.838	-61.6841	442.996	908.365	-76.7076	349.758	880.994	-69.8812	768.749	850.995	486.486	484.295	867.757	499.404	488.33	886.855	417.702	400.151	924.516	435.523	304.645	884.891	413.578
350	3.49	689.875	1393.97	177.006	733.23	1375.55	101.066	728.264	1360.32	249.664	801.173	1169.58	9.05262	777.135	1189.69	329.844	703.28	1153.83	156.183	807.854	854.663	-160.971	522.772	881.693	-145.103	537.249	892.838	-61.7193	442.992	908.354	-76.7278	349.793	880.993	-69.8942	768.762	850.992	486.48	484.352	867.759	499.402	488.184	887.115	417.431	400.228	924.456	435.535	304.658	884.887	413.564
351	3.5	689.782	1394.06	176.979	733.333	1375.56	100.96	728.302	1360.34	249.569	801.167	1169.56	9.01186	777.125	1189.67	329.794	703.411	1153.76	156.12	807.873	854.662	-160.975	522.737	881.693	-145.144	537.278	892.82	-61.7993	442.982	908.339	-76.7544	349.788	880.988	-69.9544	768.742	850.968	486.468	484.315	867.74	499.398	487.981	887.487	417.102	400.293	924.397	435.489	304.678	884.877	413.533
352	3.51	689.811	1394.11	176.958	733.402	1375.56	100.888	728.337	1360.37	249.52	801.169	1169.54	8.96653	777.123	1189.65	329.762	703.441	1153.73	156.1	807.85	854.637	-160.982	522.73	881.688	-145.181	537.29	892.784	-61.8563	442.966	908.339	-76.785	349.759	880.964	-69.987	768.726	850.949	486.444	484.301	867.724	499.397	488.278	886.945	417.505	400.347	924.356	435.458	304.686	884.853	413.53
353	3.52	689.863	1394.19	176.949	733.384	1375.55	100.899	728.407	1360.43	249.499	801.185	1169.54	8.9668	777.114	1189.64	329.754	703.41	1153.76	156.101	807.858	854.635	-160.999	522.736	881.692	-145.174	537.302	892.801	-61.8495	442.977	908.292	-76.8071	349.746	880.955	-69.9802	768.697	850.933	486.447	484.332	867.733	499.396	488.371	886.832	417.619	400.319	924.351	435.451	304.697	884.841	413.546
354	3.53	689.8	1394.26	176.93	733.416	1375.56	100.865	728.423	1360.48	249.458	801.186	1169.57	8.98166	777.107	1189.64	329.757	703.356	1153.82	156.088	807.825	854.648	-160.997	522.703	881.693	-145.147	537.228	892.832	-61.7818	442.933	908.285	-76.7905	349.698	880.949	-69.9503	768.705	850.935	486.459	484.357	867.738	499.386	488.368	886.834	417.663	400.293	924.364	435.484	304.664	884.852	413.555
355	3.54	689.779	1394.3	176.896	733.488	1375.55	100.829	728.428	1360.51	249.401	801.226	1169.58	8.97043	777.109	1189.65	329.745	703.33	1153.89	156.086	807.778	854.666	-161.003	522.665	881.715	-145.161	537.181	892.884	-61.7646	442.934	908.324	-76.7886	349.662	880.945	-69.9481	768.724	850.956	486.461	484.323	867.75	499.362	488.31	886.828	417.653	400.225	924.397	435.48	304.618	884.871	413.539
356	3.55	689.881	1394.31	176.858	733.58	1375.57	100.81	728.501	1360.56	249.37	801.272	1169.6	8.96022	777.141	1189.66	329.732	703.438	1153.89	156.078	807.799	854.715	-161.045	522.706	881.741	-145.176	537.245	892.901	-61.8005	442.971	908.328	-76.7979	349.726	880.95	-69.9835	768.721	850.989	486.447	484.303	867.791	499.373	488.299	886.852	417.617	400.204	924.446	435.485	304.618	884.88	413.526
357	3.56	690.068	1394.33	176.829	733.681	1375.61	100.81	728.615	1360.6	249.357	801.331	1169.64	8.9673	777.168	1189.67	329.726	703.517	1153.92	156.091	807.795	854.758	-161.066	522.733	881.777	-145.156	537.278	892.949	-61.7888	442.992	908.331	-76.8159	349.769	880.957	-69.9783	768.743	851.021	486.436	484.317	867.812	499.401	488.284	886.869	417.609	400.114	924.516	435.485	304.644	884.884	413.532
358	3.57	690.112	1394.43	176.832	733.696	1375.65	100.808	728.706	1360.65	249.348	801.369	1169.68	8.98021	777.185	1189.69	329.738	703.535	1153.99	156.106	807.771	854.814	-161.107	522.686	881.814	-145.135	537.225	892.976	-61.7774	442.935	908.354	-76.7913	349.713	880.982	-69.927	768.746	851.033	486.422	484.32	867.814	499.407	488.265	886.917	417.625	400.062	924.573	435.496	304.615	884.91	413.545
359	3.58	690.146	1394.45	176.784	733.781	1375.65	100.775	728.764	1360.68	249.342	801.389	1169.69	8.96131	777.203	1189.69	329.731	703.553	1154.04	156.101	807.739	854.826	-161.143	522.611	881.848	-145.127	537.14	892.934	-61.7986	442.872	908.374	-76.7906	349.657	880.99	-69.9113	768.764	851.044	486.397	484.313	867.8	499.388	488.219	886.935	417.613	400.055	924.565	435.458	304.598	884.926	413.551
360	3.59	690.333	1394.41	176.747	734.045	1375.64	100.712	728.87	1360.67	249.33	801.47	1169.7	8.93272	777.239	1189.67	329.711	703.638	1154.08	156.078	807.742	854.823	-161.154	522.632	881.846	-145.143	537.14	892.961	-61.7999	442.916	908.369	-76.8268	349.666	880.991	-69.9432	768.775	851.048	486.373	484.301	867.801	499.385	488.094	887.192	417.34	400.096	924.519	435.446	304.626	884.911	413.533
361	3.6	690.389	1394.42	176.722	734.162	1375.64	100.7	729.002	1360.64	249.356	801.541	1169.69	8.92214	777.288	1189.66	329.707	703.819	1154.11	156.063	807.73	854.831	-161.167	522.677	881.836	-145.164	537.228	892.884	-61.8271	442.939	908.333	-76.8313	349.715	880.956	-69.9369	768.763	851.03	486.359	484.305	867.795	499.378	487.9	887.506	417.03	400.173	924.482	435.463	304.67	884.884	413.537
362	3.61	690.541	1394.38	176.698	734.208	1375.64	100.685	729.062	1360.61	249.386	801.604	1169.69	8.94083	777.328	1189.65	329.703	704.045	1154.22	156.096	807.707	854.802	-161.149	522.646	881.834	-145.154	537.213	892.861	-61.8438	442.864	908.333	-76.8073	349.656	880.956	-69.9318	768.78	851.012	486.353	484.318	867.747	499.359	488.203	887.006	417.477	400.291	924.367	435.467	304.691	884.851	413.541
363	3.62	690.543	1394.4	176.748	734.202	1375.66	100.713	729.135	1360.6	249.395	801.675	1169.7	8.92691	777.354	1189.65	329.687	704.352	1154.49	156.12	807.707	854.799	-161.154	522.604	881.845	-145.148	537.169	892.918	-61.8289	442.845	908.337	-76.7991	349.62	880.958	-69.9196	768.811	851.008	486.341	484.326	867.718	499.339	488.303	886.857	417.591	400.374	924.31	435.459	304.709	884.83	413.538
364	3.63	690.523	1394.45	176.79	734.232	1375.69	100.723	729.248	1360.6	249.412	801.77	1169.71	8.91443	777.404	1189.64	329.666	704.825	1154.88	156.155	807.768	854.796	-161.17	522.628	881.847	-145.173	537.216	892.995	-61.8362	442.89	908.318	-76.8345	349.654	880.954	-69.9295	768.851	851.034	486.338	484.383	867.738	499.335	488.357	886.83	417.641	400.455	924.3	435.445	304.736	884.824	413.527
365	3.64	690.531	1394.56	176.801	734.361	1375.74	100.682	729.347	1360.63	249.443	801.828	1169.73	8.92402	777.465	1189.65	329.666	705.33	1155.21	156.208	807.787	854.811	-161.171	522.66	881.855	-145.185	537.182	893.002	-61.8017	442.918	908.309	-76.8615	349.713	880.954	-69.9485	768.836	851.039	486.352	484.419	867.789	499.335	488.385	886.824	417.663	400.426	924.336	435.422	304.73	884.854	413.53
366	3.65	690.55	1394.63	176.806	734.406	1375.77	100.645	729.402	1360.66	249.462	801.856	1169.74	8.90777	777.479	1189.68	329.65	705.556	1155.48	156.285	807.756	854.796	-161.165	522.623	881.852	-145.194	537.1	893.034	-61.7837	442.924	908.305	-76.8713	349.708	880.971	-69.9723	768.813	851.042	486.343	484.448	867.821	499.357	488.399	886.866	417.659	400.349	924.379	435.413	304.699	884.874	413.525
367	3.66	690.536	1394.68	176.82	734.4	1375.79	100.626	729.452	1360.69	249.479	801.875	1169.77	8.89349	777.502	1189.72	329.633	705.692	1155.64	156.332	807.73	854.811	-161.201	522.626	881.842	-145.209	537.091	893.061	-61.8225	442.898	908.31	-76.8942	349.661	880.958	-69.9751	768.803	851.062	486.34	484.392	867.829	499.365	488.346	886.896	417.616	400.256	924.451	435.378	304.665	884.882	413.516
368	3.67	690.681	1394.69	176.839	734.44	1375.78	100.642	729.519	1360.72	249.509	801.907	1169.78	8.87418	777.509	1189.75	329.639	705.837	1155.74	156.368	807.679	854.837	-161.207	522.656	881.841	-145.218	537.166	893.003	-61.8749	442.92	908.292	-76.9193	349.689	880.937	-69.9822	768.792	851.086	486.344	484.383	867.846	499.354	488.302	886.905	417.595	400.137	924.529	435.374	304.627	884.905	413.508
369	3.68	690.827	1394.66	176.857	734.433	1375.76	100.669	729.566	1360.74	249.518	801.9	1169.78	8.86525	777.509	1189.78	329.644	705.922	1155.85	156.392	807.671	854.826	-161.194	522.673	881.843	-145.205	537.274	892.9	-61.9361	442.916	908.273	-76.9251	349.725	880.929	-69.9748	768.806	851.107	486.367	484.342	867.856	499.373	488.281	886.932	417.607	400.088	924.541	435.411	304.614	884.896	413.52
370	3.69	690.959	1394.65	176.867	734.421	1375.74	100.647	729.612	1360.77	249.532	801.92	1169.82	8.86193	777.527	1189.81	329.656	705.982	1155.92	156.415	807.668	854.827	-161.2	522.667	881.839	-145.185	537.256	892.905	-61.9295	442.889	908.264	-76.9041	349.731	880.916	-69.9569	768.821	851.14	486.368	484.345	867.868	499.379	488.256	886.962	417.599	400.115	924.505	435.425	304.618	884.897	413.531
371	3.7	690.93	1394.69	176.879	734.354	1375.72	100.652	729.65	1360.78	249.542	801.923	1169.83	8.87058	777.555	1189.82	329.655	706.098	1155.93	156.455	807.661	854.843	-161.205	522.671	881.836	-145.161	537.22	892.894	-61.8947	442.884	908.256	-76.8794	349.708	880.921	-69.929	768.814	851.151	486.357	484.336	867.836	499.356	488.255	886.969	417.622	400.163	924.498	435.418	304.63	884.894	413.546
372	3.71	690.973	1394.69	176.866	734.329	1375.74	100.654	729.685	1360.78	249.542	801.92	1169.82	8.87537	777.583	1189.83	329.666	706.162	1155.88	156.46	807.678	854.852	-161.204	522.702	881.838	-145.163	537.212	892.915	-61.8566	442.908	908.227	-76.8916	349.704	880.92	-69.9296	768.783	851.144	486.379	484.307	867.813	499.37	488.295	886.934	417.623	400.22	924.425	435.442	304.66	884.877	413.553
373	3.72	690.942	1394.71	176.847	734.367	1375.73	100.562	729.704	1360.78	249.525	801.926	1169.81	8.86273	777.604	1189.81	329.669	706.15	1155.79	156.461	807.658	854.845	-161.183	522.718	881.823	-145.179	537.232	893.011	-61.8351	442.947	908.194	-76.9101	349.716	880.904	-69.9526	768.777	851.141	486.418	484.358	867.812	499.385	488.15	887.183	417.357	400.226	924.423	435.45	304.694	884.873	413.535
374	3.73	690.826	1394.73	176.814	734.306	1375.73	100.524	729.722	1360.79	249.482	801.937	1169.83	8.85031	777.602	1189.78	329.659	706.167	1155.72	156.445	807.664	854.887	-161.199	522.689	881.818	-145.196	537.256	893.024	-61.8506	442.913	908.232	-76.9189	349.685	880.899	-69.9583	768.787	851.124	486.442	484.435	867.821	499.377	487.977	887.512	417.07	400.25	924.41	435.439	304.737	884.862	413.525
375	3.74	690.845	1394.75	176.783	734.203	1375.74	100.52	729.697	1360.82	249.457	801.932	1169.84	8.85075	777.59	1189.77	329.671	705.972	1155.73	156.475	807.696	854.905	-161.226	522.636	881.85	-145.189	537.176	893.059	-61.8197	442.841	908.276	-76.9031	349.667	880.921	-69.9595	768.786	851.122	486.443	484.47	867.84	499.375	488.144	887.313	417.26	400.343	924.376	435.507	304.739	884.858	413.541
376	3.75	690.837	1394.75	176.733	734.194	1375.73	100.462	729.662	1360.84	249.439	801.867	1169.87	8.86057	777.576	1189.78	329.687	705.788	1155.7	156.478	807.659	854.909	-161.218	522.614	881.885	-145.174	537.099	893.067	-61.8047	442.824	908.273	-76.8824	349.622	880.953	-69.9141	768.795	851.132	486.469	484.44	867.828	499.384	488.005	887.556	417.062	400.399	924.326	435.516	304.736	884.856	413.552
377	3.76	690.812	1394.74	176.651	734.21	1375.68	100.397	729.618	1360.85	249.37	801.829	1169.89	8.87028	777.56	1189.79	329.692	705.759	1155.62	156.448	807.625	854.951	-161.226	522.644	881.903	-145.191	537.104	893.014	-61.8565	442.835	908.294	-76.8831	349.604	880.97	-69.9152	768.79	851.128	486.491	484.426	867.827	499.414	488.233	887.033	417.479	400.449	924.311	435.444	304.716	884.847	413.544
378	3.77	690.731	1394.74	176.583	734.157	1375.65	100.349	729.538	1360.87	249.312	801.805	1169.91	8.87968	777.524	1189.82	329.693	705.698	1155.58	156.424	807.573	854.986	-161.247	522.62	881.94	-145.198	537.088	892.997	-61.8636	442.812	908.33	-76.8872	349.578	880.998	-69.9412	768.776	851.129	486.486	484.404	867.831	499.401	488.275	886.907	417.578	400.39	924.359	435.429	304.72	884.861	413.533
379	3.78	690.57	1394.75	176.56	734.124	1375.61	100.327	729.427	1360.89	249.281	801.757	1169.94	8.91733	777.508	1189.83	329.728	705.561	1155.58	156.439	807.543	855.001	-161.268	522.552	881.965	-145.155	537.044	893.022	-61.8341	442.8	908.343	-76.8862	349.515	880.993	-69.8886	768.774	851.123	486.472	484.387	867.819	499.386	488.315	886.91	417.645	400.341	924.377	435.46	304.724	884.88	413.542
380	3.79	690.471	1394.73	176.537	734.081	1375.6	100.298	729.318	1360.89	249.241	801.703	1169.95	8.96516	777.471	1189.82	329.735	705.456	1155.55	156.449	807.488	855.015	-161.273	522.548	881.973	-145.127	537.024	893.035	-61.7974	442.746	908.336	-76.837	349.483	880.996	-69.8511	768.762	851.112	486.479	484.393	867.832	499.379	488.27	886.932	417.662	400.192	924.473	435.437	304.704	884.9	413.553
381	3.8	690.278	1394.75	176.477	734.052	1375.59	100.255	729.258	1360.87	249.178	801.687	1169.93	8.9491	777.424	1189.77	329.707	705.492	1155.48	156.424	807.526	855.043	-161.304	522.595	881.946	-145.154	537.051	893.047	-61.8103	442.745	908.294	-76.8252	349.529	880.976	-69.8718	768.78	851.114	486.485	484.365	867.826	499.377	488.309	886.939	417.654	400.2	924.495	435.41	304.707	884.9	413.549
382	3.81	690.17	1394.74	176.412	734.03	1375.56	100.23	729.185	1360.84	249.134	801.655	1169.9	8.9183	777.378	1189.75	329.696	705.547	1155.4	156.389	807.558	855.054	-161.339	522.624	881.91	-145.19	537.099	893.078	-61.8334	442.798	908.245	-76.8899	349.575	880.924	-69.9287	768.776	851.095	486.455	484.348	867.805	499.377	488.359	886.897	417.611	400.297	924.428	435.409	304.717	884.882	413.526
383	3.82	690.253	1394.71	176.368	734.016	1375.55	100.202	729.114	1360.84	249.107	801.599	1169.88	8.91143	777.332	1189.73	329.685	705.576	1155.35	156.38	807.579	855.045	-161.351	522.608	881.888	-145.196	537.075	893.053	-61.832	442.808	908.223	-76.9252	349.562	880.899	-69.9264	768.766	851.075	486.429	484.38	867.805	499.375	488.337	886.862	417.605	400.394	924.327	435.466	304.702	884.876	413.529
384	3.83	690.152	1394.72	176.352	734.037	1375.53	100.178	729.047	1360.83	249.067	801.561	1169.88	8.92633	777.303	1189.73	329.672	705.582	1155.34	156.375	807.588	855.05	-161.352	522.587	881.889	-145.185	537.056	893.091	-61.7865	442.822	908.198	-76.9409	349.533	880.885	-69.9162	768.758	851.063	486.43	484.373	867.782	499.371	488.354	886.85	417.617	400.394	924.3	435.446	304.696	884.86	413.53
385	3.84	690.132	1394.68	176.302	734.019	1375.53	100.174	728.984	1360.82	249.046	801.538	1169.89	8.92927	777.259	1189.75	329.654	705.548	1155.36	156.358	807.542	855.058	-161.357	522.579	881.897	-145.185	537.077	893.073	-61.8207	442.82	908.188	-76.9604	349.523	880.878	-69.9141	768.748	851.065	486.434	484.315	867.754	499.372	488.373	886.861	417.638	400.357	924.325	435.447	304.689	884.846	413.541
386	3.85	690.246	1394.6	176.256	733.963	1375.51	100.165	728.917	1360.82	249.028	801.535	1169.92	8.92252	777.212	1189.77	329.641	705.482	1155.37	156.347	807.504	855.037	-161.362	522.582	881.916	-145.195	537.104	893.007	-61.8679	442.742	908.243	-76.9342	349.513	880.873	-69.9025	768.747	851.076	486.418	484.297	867.75	499.371	488.376	886.848	417.638	400.34	924.321	435.485	304.68	884.843	413.543
387	3.86	690.314	1394.58	176.235	733.898	1375.53	100.166	728.875	1360.83	249.027	801.53	1169.93	8.92837	777.181	1189.81	329.647	705.408	1155.4	156.359	807.489	855.015	-161.347	522.565	881.939	-145.201	537.11	893.005	-61.8695	442.729	908.273	-76.9191	349.504	880.883	-69.8935	768.743	851.078	486.412	484.351	867.758	499.369	488.356	886.847	417.656	400.382	924.282	435.501	304.68	884.846	413.54
388	3.87	690.092	1394.62	176.25	733.892	1375.55	100.147	728.837	1360.84	249.015	801.529	1169.96	8.94006	777.163	1189.85	329.657	705.366	1155.47	156.35	807.443	855.008	-161.328	522.57	881.952	-145.176	537.104	893.022	-61.8802	442.74	908.276	-76.9201	349.49	880.896	-69.8721	768.745	851.088	486.426	484.324	867.777	499.377	488.329	886.85	417.661	400.41	924.258	435.495	304.694	884.859	413.546
389	3.88	689.935	1394.69	176.267	733.848	1375.57	100.12	728.822	1360.86	249.009	801.512	1169.98	8.93743	777.143	1189.87	329.641	705.337	1155.5	156.323	807.441	855.001	-161.286	522.566	881.969	-145.173	537.075	893.054	-61.8922	442.733	908.281	-76.919	349.453	880.916	-69.8506	768.76	851.112	486.436	484.333	867.789	499.363	488.319	886.863	417.653	400.353	924.3	435.451	304.659	884.875	413.548
390	3.89	689.883	1394.71	176.287	733.756	1375.6	100.144	728.782	1360.86	249.011	801.516	1170	8.92833	777.102	1189.9	329.623	705.303	1155.48	156.315	807.459	855.038	-161.274	522.533	881.992	-145.167	537.039	893.06	-61.8584	442.737	908.311	-76.9292	349.445	880.918	-69.8394	768.752	851.138	486.425	484.38	867.822	499.372	488.135	887.184	417.413	400.331	924.366	435.448	304.636	884.889	413.527
391	3.9	689.837	1394.67	176.281	733.712	1375.62	100.142	728.752	1360.87	249	801.516	1170	8.92564	777.072	1189.89	329.599	705.316	1155.48	156.282	807.482	855.081	-161.279	522.544	881.98	-145.168	537.058	893.1	-61.8208	442.739	908.299	-76.9266	349.469	880.924	-69.8439	768.742	851.161	486.423	484.356	867.856	499.375	487.933	887.56	417.091	400.242	924.426	435.463	304.619	884.895	413.512
392	3.91	689.756	1394.61	176.262	733.658	1375.64	100.128	728.703	1360.87	248.973	801.494	1169.99	8.90845	777.042	1189.88	329.584	705.373	1155.43	156.259	807.494	855.09	-161.279	522.543	881.961	-145.178	536.993	893.183	-61.7829	442.743	908.266	-76.9611	349.492	880.918	-69.8644	768.748	851.193	486.44	484.306	867.856	499.376	488.151	887.054	417.47	400.158	924.497	435.439	304.6	884.893	413.513
393	3.92	689.683	1394.54	176.206	733.529	1375.62	100.157	728.645	1360.85	248.938	801.48	1169.98	8.90391	776.995	1189.87	329.571	705.417	1155.38	156.234	807.475	855.079	-161.255	522.529	881.948	-145.181	536.94	893.175	-61.7702	442.716	908.245	-76.9521	349.451	880.913	-69.8749	768.748	851.208	486.453	484.241	867.839	499.381	488.103	886.924	417.522	400.143	924.513	435.457	304.557	884.879	413.505
394	3.93	689.698	1394.44	176.151	733.46	1375.61	100.155	728.641	1360.81	248.924	801.477	1169.98	8.90019	776.975	1189.86	329.555	705.45	1155.37	156.219	807.485	855.075	-161.256	522.542	881.924	-145.188	536.921	893.19	-61.7513	442.733	908.227	-76.961	349.425	880.895	-69.8841	768.753	851.207	486.458	484.245	867.805	499.392	488.132	886.87	417.514	400.247	924.45	435.455	304.574	884.851	413.5
395	3.94	689.785	1394.37	176.108	733.46	1375.6	100.13	728.642	1360.81	248.917	801.487	1169.99	8.9163	776.996	1189.85	329.559	705.48	1155.4	156.223	807.486	855.077	-161.226	522.576	881.911	-145.187	536.988	893.174	-61.7876	442.731	908.222	-76.9425	349.442	880.881	-69.8951	768.752	851.186	486.46	484.282	867.775	499.382	488.222	886.864	417.579	400.23	924.432	435.476	304.636	884.842	413.5
396	3.95	689.653	1394.37	176.064	733.424	1375.57	100.119	728.607	1360.84	248.926	801.502	1170.01	8.95974	777.021	1189.85	329.589	705.432	1155.48	156.259	807.536	855.053	-161.199	522.547	881.944	-145.151	536.997	893.089	-61.8059	442.66	908.25	-76.8856	349.392	880.891	-69.8364	768.747	851.164	486.481	484.281	867.746	499.391	488.226	886.844	417.62	400.186	924.407	435.516	304.637	884.85	413.521
397	3.96	689.546	1394.35	176.003	733.349	1375.58	100.081	728.563	1360.85	248.899	801.498	1170.02	8.98104	777.032	1189.85	329.602	705.416	1155.53	156.29	807.508	855.02	-161.17	522.52	881.986	-145.112	536.99	893.072	-61.8214	442.625	908.292	-76.8642	349.368	880.913	-69.8296	768.754	851.152	486.487	484.327	867.753	499.393	488.309	886.844	417.668	400.265	924.357	435.491	304.652	884.853	413.551
398	3.97	689.492	1394.38	175.907	733.358	1375.58	100.017	728.583	1360.85	248.859	801.51	1170.02	8.96231	777.032	1189.84	329.586	705.497	1155.55	156.273	807.501	855.001	-161.195	522.543	881.991	-145.135	536.996	893.083	-61.8235	442.668	908.294	-76.8969	349.425	880.92	-69.8696	768.746	851.153	486.48	484.377	867.787	499.396	488.402	886.855	417.693	400.426	924.3	435.457	304.704	884.856	413.544
399	3.98	689.551	1394.35	175.81	733.336	1375.58	99.987	728.552	1360.86	248.805	801.56	1170.03	8.92771	777.074	1189.84	329.563	705.553	1155.58	156.25	807.49	855.009	-161.224	522.554	881.985	-145.146	537.016	893.082	-61.8421	442.693	908.303	-76.9098	349.432	880.925	-69.8649	768.768	851.154	486.471	484.426	867.806	499.394	488.404	886.848	417.684	400.45	924.336	435.441	304.756	884.848	413.523
400	3.99	689.5	1394.36	175.762	733.31	1375.59	99.9726	728.476	1360.87	248.769	801.583	1170.03	8.92237	777.101	1189.83	329.551	705.583	1155.6	156.259	807.461	855.017	-161.215	522.53	881.993	-145.162	537.014	893.07	-61.8465	442.688	908.312	-76.9298	349.444	880.911	-69.8643	768.762	851.143	486.45	484.443	867.806	499.385	488.381	886.869	417.677	400.402	924.388	435.421	304.725	884.857	413.531
401	4	689.441	1394.34	175.698	733.295	1375.58	99.9524	728.432	1360.9	248.74	801.584	1170.03	8.93054	777.085	1189.82	329.543	705.618	1155.63	156.262	807.439	855.04	-161.24	522.51	881.991	-145.173	536.993	893.072	-61.8468	442.711	908.272	-76.9566	349.42	880.885	-69.8876	768.748	851.13	486.425	484.384	867.812	499.383	488.362	886.853	417.637	400.333	924.41	435.431	304.678	884.859	413.536
402	4.01	689.509	1394.3	175.643	733.293	1375.56	99.912	728.42	1360.91	248.72	801.606	1170.03	8.91301	777.095	1189.81	329.535	705.787	1155.64	156.243	807.43	855.078	-161.289	522.544	881.978	-145.201	537.049	893.07	-61.866	442.782	908.179	-76.9869	349.411	880.876	-69.9159	768.747	851.127	486.387	484.344	867.81	499.38	488.327	886.84	417.586	400.268	924.424	435.416	304.644	884.868	413.514
403	4.02	689.665	1394.21	175.566	733.371	1375.54	99.8895	728.374	1360.91	248.688	801.636	1170.04	8.89948	777.132	1189.8	329.534	705.943	1155.62	156.229	807.416	855.101	-161.303	522.57	881.954	-145.216	537.063	893.055	-61.8698	442.774	908.173	-77.012	349.416	880.851	-69.9267	768.764	851.144	486.36	484.356	867.816	499.38	488.254	886.852	417.558	400.194	924.451	435.401	304.621	884.873	413.514
404	4.03	689.665	1394.18	175.522	733.383	1375.55	99.894	728.362	1360.92	248.671	801.679	1170.06	8.90279	777.156	1189.8	329.54	706.037	1155.66	156.241	807.415	855.108	-161.296	522.543	881.976	-145.184	537.075	893.047	-61.8713	442.731	908.222	-76.9816	349.386	880.845	-69.891	768.8	851.149	486.36	484.363	867.826	499.376	488.217	886.865	417.578	400.146	924.479	435.435	304.606	884.87	413.517
405	4.04	689.433	1394.28	175.562	733.343	1375.58	99.8827	728.361	1360.92	248.671	801.753	1170.11	8.91625	777.2	1189.82	329.558	706.093	1155.72	156.268	807.367	855.094	-161.275	522.496	882.003	-145.166	537.006	893.082	-61.8336	442.7	908.243	-76.95	349.375	880.865	-69.8594	768.816	851.161	486.348	484.402	867.81	499.361	488.293	886.885	417.615	400.229	924.427	435.457	304.629	884.879	413.542
406	4.05	689.421	1394.3	175.546	733.347	1375.59	99.867	728.406	1360.93	248.663	801.776	1170.13	8.92756	777.227	1189.83	329.561	706.143	1155.75	156.276	807.376	855.101	-161.305	522.477	882.026	-145.146	536.98	893.106	-61.8151	442.703	908.257	-76.9291	349.382	880.875	-69.858	768.835	851.165	486.3	484.433	867.818	499.34	488.379	886.883	417.631	400.235	924.428	435.441	304.655	884.881	413.556
407	4.06	689.521	1394.25	175.5	733.417	1375.59	99.8579	728.469	1360.94	248.655	801.814	1170.14	8.92507	777.282	1189.82	329.559	706.173	1155.76	156.279	807.396	855.117	-161.318	522.493	882.03	-145.141	536.998	893.121	-61.8154	442.701	908.284	-76.9153	349.386	880.911	-69.8508	768.851	851.154	486.276	484.454	867.788	499.355	488.418	886.879	417.673	400.362	924.394	435.436	304.718	884.861	413.553
408	4.07	689.517	1394.26	175.465	733.447	1375.59	99.8573	728.479	1360.93	248.639	801.858	1170.13	8.92085	777.312	1189.8	329.539	706.245	1155.75	156.258	807.411	855.121	-161.316	522.51	882.024	-145.162	536.989	893.151	-61.8312	442.694	908.269	-76.9322	349.391	880.92	-69.8717	768.86	851.155	486.296	484.413	867.757	499.366	488.415	886.861	417.663	400.451	924.356	435.434	304.745	884.847	413.55
409	4.08	689.517	1394.28	175.439	733.424	1375.58	99.8568	728.489	1360.92	248.625	801.884	1170.13	8.90467	777.325	1189.79	329.527	706.307	1155.75	156.209	807.458	855.123	-161.319	522.521	882.018	-145.174	537.004	893.145	-61.8545	442.67	908.267	-76.9411	349.397	880.892	-69.8779	768.898	851.16	486.305	484.365	867.76	499.369	488.408	886.833	417.629	400.536	924.28	435.435	304.763	884.831	413.533
410	4.09	689.668	1394.26	175.396	733.422	1375.6	99.8402	728.507	1360.95	248.614	801.923	1170.13	8.87889	777.349	1189.8	329.527	706.213	1155.78	156.21	807.426	855.113	-161.326	522.523	882.013	-145.175	537.002	893.139	-61.8712	442.64	908.265	-76.9338	349.393	880.872	-69.874	768.905	851.159	486.292	484.442	867.768	499.355	488.357	886.829	417.601	400.449	924.311	435.427	304.739	884.825	413.527
411	4.1	689.876	1394.24	175.369	733.499	1375.59	99.82	728.553	1360.98	248.6	801.953	1170.12	8.85415	777.362	1189.8	329.517	706.27	1155.76	156.195	807.406	855.115	-161.333	522.506	882.001	-145.187	536.989	893.138	-61.8705	442.656	908.237	-76.96	349.386	880.857	-69.8814	768.864	851.162	486.284	484.468	867.771	499.344	488.32	886.832	417.597	400.356	924.302	435.448	304.701	884.839	413.526
412	4.11	689.873	1394.34	175.401	733.478	1375.61	99.8213	728.619	1361	248.594	801.959	1170.11	8.82842	777.375	1189.82	329.505	706.378	1155.7	156.152	807.423	855.127	-161.334	522.531	881.992	-145.207	536.999	893.135	-61.8653	442.724	908.215	-77.0174	349.413	880.845	-69.8705	768.85	851.177	486.301	484.413	867.781	499.345	488.133	887.138	417.35	400.303	924.359	435.42	304.682	884.856	413.529
413	4.12	689.713	1394.46	175.476	733.497	1375.67	99.832	728.669	1361.05	248.597	801.983	1170.11	8.81363	777.378	1189.83	329.498	706.337	1155.69	156.124	807.419	855.128	-161.325	522.536	882.01	-145.198	536.988	893.144	-61.8543	442.7	908.237	-76.9953	349.421	880.871	-69.8685	768.852	851.201	486.323	484.375	867.826	499.353	487.917	887.542	417.046	400.185	924.448	435.396	304.667	884.882	413.534
414	4.13	689.801	1394.54	175.518	733.598	1375.7	99.817	728.742	1361.1	248.609	802.019	1170.14	8.80619	777.374	1189.84	329.495	706.182	1155.73	156.143	807.414	855.114	-161.323	522.521	882.027	-145.179	536.992	893.17	-61.8552	442.658	908.266	-76.9738	349.415	880.881	-69.8888	768.847	851.223	486.319	484.415	867.866	499.351	488.194	887.085	417.457	400.129	924.487	435.386	304.651	884.902	413.527
415	4.14	690.018	1394.61	175.532	733.681	1375.7	99.8052	728.822	1361.12	248.604	802.045	1170.17	8.79227	777.381	1189.86	329.485	706.177	1155.7	156.12	807.439	855.094	-161.333	522.536	882.03	-145.187	537.047	893.151	-61.8582	442.668	908.28	-76.9684	349.423	880.896	-69.8924	768.838	851.222	486.33	484.444	867.889	499.36	488.273	886.974	417.557	400.193	924.425	435.429	304.662	884.908	413.533
416	4.15	690.363	1394.61	175.48	733.697	1375.69	99.8274	728.882	1361.14	248.594	802.025	1170.16	8.77564	777.387	1189.89	329.475	706.16	1155.63	156.087	807.419	855.064	-161.304	522.552	882.034	-145.21	537.07	893.117	-61.8826	442.696	908.262	-76.9811	349.387	880.904	-69.8739	768.846	851.223	486.352	484.412	867.888	499.37	488.325	886.962	417.621	400.225	924.392	435.461	304.667	884.895	413.548
417	4.16	690.429	1394.68	175.493	733.733	1375.68	99.8391	728.978	1361.16	248.583	801.984	1170.13	8.7602	777.363	1189.91	329.48	705.958	1155.55	156.092	807.419	855.021	-161.291	522.529	882.032	-145.204	537.041	893.1	-61.882	442.647	908.264	-76.9595	349.392	880.876	-69.8803	768.836	851.211	486.369	484.363	867.865	499.371	488.325	886.939	417.653	400.239	924.371	435.461	304.658	884.877	413.55
418	4.17	690.593	1394.71	175.518	733.8	1375.7	99.8268	729.089	1361.17	248.581	801.967	1170.1	8.74533	777.327	1189.9	329.475	705.798	1155.46	156.08	807.458	855.01	-161.307	522.545	882.013	-145.186	537.056	893.091	-61.8738	442.659	908.238	-76.9638	349.347	880.841	-69.8544	768.818	851.189	486.369	484.375	867.852	499.366	488.345	886.915	417.664	400.239	924.389	435.459	304.684	884.852	413.547
419	4.18	690.916	1394.75	175.477	733.865	1375.72	99.811	729.187	1361.19	248.572	801.957	1170.06	8.73771	777.33	1189.88	329.458	705.662	1155.37	156.068	807.499	854.989	-161.324	522.582	881.98	-145.185	537.061	893.095	-61.8742	442.7	908.202	-76.9926	349.397	880.821	-69.8619	768.804	851.184	486.365	484.388	867.85	499.391	488.433	886.871	417.649	400.361	924.295	435.474	304.729	884.828	413.545
420	4.19	691.103	1394.78	175.419	733.932	1375.73	99.7941	729.234	1361.19	248.538	801.924	1170.04	8.72223	777.294	1189.84	329.428	705.557	1155.22	156.014	807.482	854.991	-161.322	522.544	881.966	-145.208	537.043	893.131	-61.8714	442.692	908.182	-76.9928	349.395	880.814	-69.8864	768.826	851.202	486.366	484.406	867.834	499.386	488.442	886.816	417.63	400.43	924.248	435.452	304.726	884.817	413.534
421	4.2	691.118	1394.84	175.378	733.992	1375.76	99.7819	729.25	1361.23	248.506	801.864	1170.05	8.70757	777.265	1189.84	329.413	705.329	1155.11	155.972	807.467	855.009	-161.334	522.5	881.959	-145.203	537.001	893.203	-61.8557	442.684	908.191	-77.011	349.368	880.82	-69.8785	768.85	851.22	486.369	484.448	867.836	499.367	488.42	886.816	417.611	400.467	924.258	435.432	304.718	884.812	413.526
422	4.21	691.073	1394.97	175.465	734.068	1375.8	99.7999	729.332	1361.29	248.525	801.869	1170.08	8.70912	777.271	1189.86	329.435	705.059	1154.97	155.968	807.458	855.018	-161.327	522.494	881.999	-145.189	536.987	893.167	-61.8397	442.674	908.22	-77.001	349.334	880.851	-69.8542	768.822	851.231	486.376	484.467	867.851	499.35	488.405	886.876	417.632	400.334	924.354	435.435	304.699	884.829	413.529
423	4.22	691.175	1395.06	175.473	734.131	1375.87	99.8393	729.391	1361.35	248.537	801.868	1170.13	8.72807	777.245	1189.89	329.464	704.701	1154.87	155.984	807.407	855.044	-161.312	522.482	882.045	-145.18	536.972	893.192	-61.8135	442.649	908.267	-76.9652	349.31	880.887	-69.8527	768.813	851.238	486.371	484.474	867.902	499.356	488.335	886.921	417.624	400.285	924.393	435.435	304.657	884.861	413.536
424	4.23	691.215	1395.13	175.464	734.172	1375.92	99.853	729.414	1361.4	248.523	801.835	1170.17	8.73074	777.217	1189.92	329.468	704.372	1154.79	155.947	807.339	855.079	-161.317	522.435	882.096	-145.186	536.959	893.206	-61.8504	442.62	908.326	-76.9687	349.31	880.902	-69.8483	768.813	851.263	486.375	484.437	867.892	499.348	488.3	886.947	417.61	400.131	924.482	435.412	304.609	884.909	413.526
425	4.24	691.219	1395.21	175.454	734.241	1375.93	99.848	729.431	1361.42	248.505	801.848	1170.21	8.7115	777.189	1189.94	329.471	704.15	1154.72	155.887	807.275	855.12	-161.342	522.404	882.132	-145.207	536.895	893.225	-61.8657	442.599	908.334	-76.9841	349.262	880.924	-69.8414	768.783	851.27	486.361	484.394	867.891	499.348	488.295	886.97	417.588	400.103	924.519	435.378	304.599	884.936	413.51
426	4.25	691.385	1395.21	175.471	734.341	1375.93	99.8656	729.458	1361.44	248.523	801.865	1170.25	8.72483	777.195	1189.96	329.484	704.106	1154.64	155.857	807.249	855.144	-161.349	522.413	882.147	-145.182	536.872	893.238	-61.8347	442.563	908.351	-76.9619	349.246	880.917	-69.8199	768.798	851.275	486.344	484.367	867.889	499.377	488.114	887.279	417.363	400.031	924.538	435.396	304.59	884.94	413.52
427	4.26	691.531	1395.17	175.523	734.433	1375.92	99.9395	729.556	1361.41	248.553	801.872	1170.25	8.74446	777.226	1189.94	329.481	704.07	1154.54	155.865	807.268	855.171	-161.371	522.405	882.145	-145.158	536.873	893.247	-61.8199	442.55	908.32	-76.9184	349.233	880.902	-69.8024	768.839	851.273	486.332	484.386	867.872	499.379	487.904	887.62	417.053	400.066	924.515	435.41	304.556	884.913	413.534
428	4.27	691.617	1395.12	175.565	734.425	1375.92	100.009	729.637	1361.38	248.563	801.896	1170.22	8.73936	777.261	1189.9	329.469	704.007	1154.45	155.874	807.29	855.192	-161.396	522.406	882.132	-145.164	536.856	893.255	-61.812	442.533	908.287	-76.9321	349.229	880.887	-69.8116	768.855	851.253	486.321	484.387	867.852	499.356	488.217	887.094	417.458	400.162	924.437	435.406	304.596	884.877	413.526
429	4.28	691.55	1395.15	175.631	734.461	1375.91	100.049	729.738	1361.33	248.575	801.939	1170.19	8.72538	777.274	1189.84	329.457	703.933	1154.39	155.867	807.318	855.21	-161.433	522.401	882.106	-145.182	536.846	893.264	-61.8015	442.553	908.244	-76.955	349.272	880.864	-69.8229	768.856	851.22	486.291	484.36	867.842	499.337	488.346	886.916	417.565	400.201	924.387	435.451	304.639	884.854	413.526
430	4.29	691.689	1395.15	175.669	734.568	1375.92	100.099	729.815	1361.32	248.614	801.995	1170.18	8.73795	777.325	1189.8	329.476	703.932	1154.33	155.9	807.329	855.198	-161.438	522.42	882.091	-145.181	536.827	893.27	-61.7705	442.56	908.214	-76.9428	349.263	880.849	-69.798	768.865	851.198	486.285	484.404	867.853	499.352	488.39	886.855	417.598	400.333	924.328	435.499	304.667	884.834	413.536
431	4.3	691.737	1395.21	175.739	734.74	1375.91	100.095	729.878	1361.32	248.661	802.039	1170.18	8.74095	777.376	1189.8	329.486	703.97	1154.29	155.929	807.283	855.187	-161.436	522.409	882.113	-145.17	536.909	893.226	-61.7871	442.563	908.244	-76.9311	349.249	880.843	-69.7734	768.882	851.191	486.296	484.419	867.848	499.37	488.383	886.827	417.604	400.41	924.278	435.507	304.689	884.826	413.541
432	4.31	691.755	1395.24	175.749	734.831	1375.93	100.091	729.9	1361.32	248.68	802.084	1170.2	8.72442	777.406	1189.79	329.473	703.907	1154.28	155.888	807.311	855.196	-161.483	522.412	882.11	-145.215	536.945	893.217	-61.8534	442.564	908.234	-76.9647	349.293	880.828	-69.8145	768.841	851.168	486.284	484.417	867.833	499.358	488.351	886.85	417.583	400.367	924.334	435.439	304.684	884.842	413.532
433	4.32	691.762	1395.25	175.774	734.924	1375.95	100.11	729.961	1361.36	248.703	802.112	1170.22	8.70774	777.439	1189.8	329.469	703.882	1154.25	155.869	807.287	855.199	-161.505	522.422	882.116	-145.238	536.97	893.217	-61.8911	442.546	908.249	-76.9962	349.305	880.833	-69.8577	768.798	851.147	486.261	484.407	867.864	499.343	488.314	886.899	417.589	400.295	924.387	435.401	304.668	884.875	413.515
434	4.33	691.85	1395.26	175.844	735.038	1375.95	100.157	730.035	1361.39	248.761	802.158	1170.27	8.721	777.471	1189.83	329.488	703.831	1154.27	155.873	807.258	855.188	-161.488	522.422	882.152	-145.197	537.004	893.218	-61.8923	442.551	908.26	-76.9614	349.319	880.849	-69.8477	768.816	851.152	486.264	484.436	867.902	499.352	488.275	886.948	417.605	400.179	924.478	435.421	304.663	884.906	413.533
435	4.34	691.885	1395.27	175.934	735.154	1375.94	100.188	730.111	1361.42	248.83	802.177	1170.31	8.72885	777.498	1189.87	329.508	703.763	1154.28	155.895	807.257	855.175	-161.463	522.437	882.169	-145.186	537.018	893.228	-61.8735	442.592	908.268	-76.9411	349.342	880.852	-69.8269	768.826	851.172	486.276	484.469	867.907	499.355	488.218	886.986	417.609	400.133	924.536	435.398	304.644	884.927	413.557
436	4.35	691.952	1395.26	175.963	735.19	1375.96	100.211	730.169	1361.41	248.865	802.197	1170.32	8.70744	777.531	1189.89	329.495	703.748	1154.29	155.876	807.269	855.174	-161.452	522.454	882.157	-145.209	537.026	893.209	-61.8885	442.575	908.274	-76.9788	349.339	880.859	-69.8597	768.824	851.171	486.282	484.453	867.9	499.361	488.231	887.002	417.608	400.159	924.513	435.359	304.655	884.936	413.539
437	4.36	691.969	1395.28	175.998	735.242	1375.98	100.224	730.229	1361.38	248.907	802.21	1170.29	8.67333	777.537	1189.88	329.481	703.751	1154.23	155.868	807.289	855.174	-161.453	522.447	882.133	-145.226	537.044	893.183	-61.9234	442.612	908.255	-77.0241	349.345	880.858	-69.8813	768.826	851.169	486.269	484.429	867.905	499.365	488.259	886.991	417.604	400.235	924.463	435.382	304.662	884.911	413.525
438	4.37	692.026	1395.31	176.073	735.305	1376	100.263	730.333	1361.35	248.962	802.238	1170.25	8.67226	777.576	1189.86	329.482	703.788	1154.13	155.897	807.315	855.164	-161.429	522.481	882.097	-145.207	537.035	893.195	-61.9051	442.642	908.208	-77.0207	349.356	880.841	-69.8671	768.858	851.203	486.292	484.447	867.925	499.389	488.158	887.232	417.365	400.339	924.384	435.426	304.691	884.884	413.534
439	4.38	692.058	1395.35	176.153	735.363	1376.03	100.303	730.438	1361.33	249.005	802.288	1170.22	8.66951	777.613	1189.83	329.481	703.853	1154.07	155.901	807.332	855.133	-161.409	522.505	882.075	-145.204	537.009	893.226	-61.8625	442.666	908.147	-77.0236	349.343	880.839	-69.8513	768.905	851.229	486.305	484.478	867.889	499.374	488.011	887.557	417.077	400.393	924.363	435.451	304.728	884.853	413.543
440	4.39	691.958	1395.41	176.222	735.335	1376.07	100.342	730.546	1361.3	249.024	802.296	1170.21	8.65531	777.626	1189.81	329.461	703.784	1154.06	155.884	807.361	855.128	-161.422	522.477	882.07	-145.218	536.99	893.235	-61.8616	442.667	908.099	-77.0682	349.329	880.83	-69.8554	768.911	851.211	486.295	484.505	867.877	499.362	488.39	887.051	417.498	400.462	924.313	435.441	304.731	884.838	413.525
441	4.4	692.072	1395.38	176.208	735.364	1376.07	100.357	730.662	1361.26	249.053	802.294	1170.2	8.65239	777.636	1189.8	329.447	703.733	1154.04	155.853	807.367	855.129	-161.422	522.44	882.088	-145.214	536.973	893.23	-61.8739	442.658	908.122	-77.0857	349.297	880.835	-69.8708	768.896	851.192	486.278	484.561	867.887	499.356	488.485	886.921	417.605	400.528	924.234	435.431	304.739	884.828	413.516
442	4.41	692.318	1395.34	176.167	735.439	1376.08	100.362	730.759	1361.28	249.103	802.306	1170.21	8.69139	777.655	1189.82	329.484	703.763	1154.03	155.879	807.363	855.142	-161.415	522.45	882.097	-145.188	536.95	893.253	-61.8692	442.618	908.185	-77.0268	349.252	880.862	-69.84	768.917	851.205	486.303	484.533	867.865	499.363	488.472	886.877	417.62	400.533	924.231	435.419	304.741	884.816	413.524
443	4.42	692.324	1395.37	176.229	735.466	1376.1	100.389	730.847	1361.32	249.143	802.308	1170.25	8.7365	777.655	1189.85	329.538	703.773	1154.02	155.932	807.349	855.135	-161.393	522.43	882.115	-145.137	536.906	893.256	-61.8272	442.574	908.251	-76.9647	349.244	880.878	-69.7774	768.909	851.228	486.344	484.462	867.836	499.36	488.432	886.878	417.646	400.433	924.268	435.416	304.72	884.83	413.537
444	4.43	692.321	1395.45	176.268	735.479	1376.11	100.389	730.859	1361.36	249.169	802.302	1170.29	8.75962	777.633	1189.88	329.564	703.723	1154.05	155.959	807.297	855.131	-161.358	522.392	882.16	-145.123	536.891	893.338	-61.7856	442.551	908.265	-76.9465	349.209	880.889	-69.7666	768.875	851.233	486.347	484.402	867.854	499.357	488.388	886.944	417.661	400.276	924.33	435.417	304.698	884.863	413.55
445	4.44	692.369	1395.5	176.24	735.545	1376.14	100.376	730.811	1361.39	249.167	802.297	1170.32	8.76384	777.634	1189.89	329.55	703.706	1154.05	155.929	807.232	855.172	-161.373	522.376	882.203	-145.139	536.897	893.453	-61.7685	442.548	908.269	-76.9579	349.202	880.895	-69.784	768.844	851.232	486.349	484.37	867.874	499.35	488.322	886.971	417.622	400.214	924.403	435.424	304.67	884.899	413.536
446	4.45	692.441	1395.56	176.242	735.634	1376.17	100.345	730.817	1361.42	249.154	802.293	1170.32	8.75013	777.683	1189.89	329.534	703.751	1154	155.918	807.205	855.199	-161.384	522.391	882.217	-145.144	536.881	893.331	-61.7903	442.547	908.263	-76.9626	349.229	880.886	-69.798	768.823	851.228	486.378	484.438	867.914	499.354	488.148	887.259	417.351	400.189	924.462	435.434	304.676	884.919	413.517
447	4.46	692.511	1395.6	176.244	735.687	1376.21	100.33	730.841	1361.43	249.151	802.294	1170.32	8.75399	777.692	1189.88	329.542	703.729	1153.97	155.932	807.197	855.214	-161.37	522.396	882.215	-145.144	536.882	893.308	-61.7915	442.556	908.26	-76.9742	349.22	880.877	-69.7916	768.841	851.235	486.384	484.473	867.951	499.363	487.953	887.601	417.055	400.189	924.506	435.394	304.659	884.926	413.512
448	4.47	692.509	1395.61	176.241	735.74	1376.23	100.298	730.848	1361.44	249.142	802.271	1170.32	8.75901	777.661	1189.86	329.529	703.669	1153.96	155.931	807.19	855.248	-161.377	522.403	882.202	-145.169	536.88	893.291	-61.8103	442.582	908.237	-77.0117	349.2	880.861	-69.7952	768.852	851.234	486.384	484.453	867.956	499.361	488.222	887.105	417.461	400.187	924.493	435.394	304.658	884.923	413.517
449	4.48	692.544	1395.63	176.241	735.831	1376.25	100.256	730.802	1361.45	249.149	802.236	1170.31	8.76547	777.631	1189.84	329.528	703.617	1153.96	155.917	807.172	855.261	-161.427	522.404	882.186	-145.193	536.856	893.294	-61.8299	442.559	908.215	-77.0129	349.212	880.84	-69.8198	768.846	851.203	486.354	484.468	867.947	499.368	488.286	886.959	417.564	400.196	924.477	435.392	304.664	884.898	413.526
450	4.49	692.611	1395.62	176.234	735.838	1376.22	100.282	730.845	1361.43	249.168	802.22	1170.3	8.80193	777.619	1189.81	329.535	703.624	1153.91	155.924	807.152	855.272	-161.471	522.427	882.156	-145.2	536.855	893.298	-61.8374	442.571	908.194	-77.0205	349.24	880.829	-69.8346	768.828	851.168	486.343	484.453	867.9	499.38	488.194	887.2	417.358	400.258	924.431	435.379	304.655	884.886	413.507
451	4.5	692.62	1395.61	176.25	735.813	1376.2	100.336	730.862	1361.43	249.198	802.247	1170.29	8.86728	777.635	1189.78	329.56	703.611	1153.86	155.965	807.171	855.275	-161.473	522.45	882.154	-145.174	536.889	893.27	-61.8255	442.593	908.151	-77.0143	349.293	880.806	-69.8227	768.824	851.139	486.338	484.437	867.855	499.377	487.976	887.554	417.069	400.328	924.324	435.416	304.69	884.861	413.514
452	4.51	692.572	1395.64	176.318	735.832	1376.21	100.374	730.849	1361.42	249.225	802.253	1170.3	8.91012	777.633	1189.8	329.599	703.584	1153.84	155.994	807.189	855.277	-161.459	522.398	882.179	-145.133	536.892	893.247	-61.8006	442.539	908.173	-76.9721	349.227	880.817	-69.7886	768.835	851.119	486.327	484.431	867.816	499.376	488.295	887.043	417.529	400.473	924.239	435.453	304.739	884.838	413.544
453	4.52	692.557	1395.68	176.36	735.832	1376.23	100.387	730.838	1361.42	249.247	802.244	1170.31	8.91015	777.593	1189.81	329.603	703.553	1153.84	156.009	807.152	855.292	-161.474	522.358	882.176	-145.136	536.873	893.241	-61.8154	442.497	908.185	-76.9672	349.156	880.823	-69.7728	768.853	851.129	486.306	484.419	867.776	499.372	488.429	886.899	417.641	400.474	924.224	435.469	304.698	884.835	413.547
454	4.53	692.557	1395.69	176.363	735.841	1376.24	100.362	730.857	1361.43	249.265	802.236	1170.31	8.8996	777.607	1189.8	329.596	703.552	1153.78	155.997	807.14	855.307	-161.496	522.385	882.165	-145.157	536.853	893.252	-61.8203	442.499	908.183	-76.9961	349.19	880.792	-69.7753	768.857	851.125	486.299	484.425	867.795	499.352	488.433	886.874	417.638	400.35	924.284	435.473	304.69	884.848	413.543
455	4.54	692.508	1395.73	176.383	735.867	1376.28	100.366	730.844	1361.45	249.277	802.233	1170.31	8.89284	777.619	1189.8	329.596	703.543	1153.79	155.968	807.128	855.327	-161.51	522.415	882.184	-145.176	536.879	893.27	-61.8257	442.527	908.186	-76.9757	349.257	880.772	-69.7843	768.84	851.112	486.307	484.44	867.834	499.359	488.447	886.879	417.643	400.278	924.374	435.47	304.719	884.868	413.54
456	4.55	692.52	1395.75	176.389	735.847	1376.33	100.389	730.756	1361.47	249.273	802.194	1170.32	8.8986	777.614	1189.82	329.609	703.461	1153.81	155.967	807.121	855.347	-161.515	522.388	882.21	-145.171	536.889	893.288	-61.827	442.496	908.192	-76.9566	349.236	880.811	-69.7769	768.832	851.118	486.349	484.439	867.85	499.373	488.364	886.911	417.632	400.197	924.471	435.448	304.689	884.887	413.542
457	4.56	692.598	1395.76	176.356	735.806	1376.36	100.391	730.706	1361.49	249.267	802.183	1170.33	8.89968	777.598	1189.83	329.609	703.412	1153.82	155.937	807.132	855.35	-161.512	522.347	882.242	-145.181	536.894	893.31	-61.8478	442.525	908.198	-76.9923	349.188	880.844	-69.7995	768.828	851.128	486.361	484.431	867.886	499.379	488.289	886.945	417.604	400.175	924.504	435.403	304.649	884.905	413.538
458	4.57	692.565	1395.77	176.364	735.839	1376.36	100.365	730.696	1361.48	249.262	802.194	1170.33	8.88605	777.598	1189.84	329.612	703.393	1153.82	155.93	807.143	855.361	-161.529	522.342	882.237	-145.199	536.896	893.302	-61.8723	442.533	908.195	-77.0195	349.209	880.836	-69.8329	768.837	851.154	486.341	484.419	867.907	499.356	488.253	886.975	417.56	400.205	924.521	435.338	304.64	884.913	413.524
459	4.58	692.508	1395.78	176.404	735.821	1376.34	100.402	730.681	1361.46	249.283	802.199	1170.33	8.90154	777.579	1189.84	329.617	703.42	1153.82	155.963	807.099	855.364	-161.504	522.355	882.23	-145.207	536.86	893.316	-61.8464	442.528	908.182	-77.0271	349.216	880.844	-69.8104	768.849	851.166	486.333	484.432	867.89	499.344	488.257	886.95	417.55	400.295	924.447	435.376	304.651	884.909	413.519
460	4.59	692.356	1395.81	176.435	735.751	1376.36	100.453	730.674	1361.46	249.32	802.174	1170.33	8.93796	777.562	1189.85	329.634	703.42	1153.81	155.991	807.071	855.35	-161.486	522.356	882.235	-145.152	536.82	893.317	-61.8169	442.525	908.207	-77.0053	349.157	880.849	-69.7614	768.864	851.159	486.367	484.44	867.879	499.358	488.285	886.924	417.589	400.262	924.436	435.437	304.659	884.897	413.55
461	4.6	692.39	1395.79	176.44	735.698	1376.34	100.479	730.673	1361.44	249.339	802.145	1170.32	8.96122	777.563	1189.84	329.635	703.368	1153.8	155.982	807.102	855.338	-161.459	522.351	882.232	-145.129	536.784	893.31	-61.7921	442.491	908.224	-76.9886	349.123	880.839	-69.734	768.867	851.158	486.368	484.385	867.838	499.368	488.313	886.894	417.607	400.297	924.395	435.433	304.682	884.874	413.561
462	4.61	692.43	1395.75	176.455	735.675	1376.31	100.472	730.695	1361.42	249.333	802.164	1170.31	8.94562	777.526	1189.82	329.615	703.389	1153.78	155.975	807.061	855.324	-161.467	522.362	882.216	-145.153	536.807	893.31	-61.791	442.478	908.219	-76.9944	349.161	880.804	-69.7558	768.854	851.14	486.342	484.412	867.814	499.371	488.398	886.884	417.632	400.446	924.289	435.413	304.72	884.847	413.547
463	4.62	692.375	1395.78	176.486	735.627	1376.32	100.502	730.686	1361.42	249.342	802.155	1170.29	8.93493	777.513	1189.81	329.619	703.406	1153.74	155.966	807.082	855.313	-161.472	522.372	882.208	-145.152	536.804	893.309	-61.7717	442.502	908.189	-76.9975	349.156	880.797	-69.7348	768.843	851.127	486.342	484.465	867.829	499.36	488.419	886.872	417.675	400.479	924.26	435.455	304.75	884.835	413.549
464	4.63	692.217	1395.81	176.526	735.609	1376.33	100.5	730.644	1361.41	249.343	802.133	1170.28	8.94683	777.504	1189.8	329.626	703.284	1153.74	155.964	807.089	855.299	-161.456	522.355	882.211	-145.132	536.819	893.307	-61.7675	442.502	908.17	-76.9886	349.125	880.81	-69.7007	768.813	851.123	486.373	484.434	867.816	499.37	488.44	886.857	417.68	400.446	924.261	435.49	304.727	884.835	413.552
465	4.64	692.211	1395.77	176.462	735.553	1376.3	100.475	730.624	1361.4	249.323	802.106	1170.29	8.94378	777.467	1189.8	329.606	703.204	1153.72	155.933	807.061	855.296	-161.455	522.33	882.206	-145.153	536.848	893.312	-61.7899	442.502	908.159	-76.9812	349.115	880.803	-69.7258	768.8	851.13	486.389	484.41	867.827	499.365	488.397	886.862	417.659	400.377	924.296	435.472	304.707	884.836	413.542
466	4.65	692.204	1395.74	176.399	735.552	1376.27	100.453	730.608	1361.4	249.298	802.1	1170.27	8.90546	777.439	1189.8	329.572	703.276	1153.66	155.914	807.107	855.317	-161.482	522.329	882.196	-145.177	536.831	893.301	-61.8024	442.5	908.156	-77.0087	349.13	880.775	-69.7714	768.802	851.15	486.375	484.404	867.849	499.365	488.363	886.869	417.61	400.333	924.36	435.422	304.691	884.845	413.517
467	4.66	692.198	1395.71	176.389	735.523	1376.26	100.449	730.558	1361.42	249.265	802.113	1170.28	8.88936	777.446	1189.8	329.55	703.336	1153.64	155.891	807.116	855.335	-161.496	522.36	882.183	-145.18	536.82	893.298	-61.8163	442.479	908.165	-77.0048	349.14	880.778	-69.7805	768.782	851.153	486.381	484.369	867.838	499.369	488.276	886.874	417.564	400.292	924.389	435.436	304.669	884.859	413.501
468	4.67	692.201	1395.68	176.378	735.445	1376.24	100.47	730.501	1361.43	249.275	802.092	1170.29	8.90504	777.437	1189.82	329.566	703.278	1153.64	155.894	807.096	855.337	-161.479	522.343	882.193	-145.165	536.833	893.293	-61.8131	442.43	908.176	-76.9734	349.14	880.815	-69.7812	768.768	851.171	486.41	484.309	867.831	499.373	488.235	886.882	417.579	400.165	924.419	435.444	304.634	884.891	413.521
469	4.68	692.068	1395.7	176.35	735.41	1376.24	100.451	730.428	1361.43	249.253	802.063	1170.32	8.90564	777.412	1189.84	329.562	702.711	1154	156.031	807.071	855.345	-161.494	522.326	882.229	-145.167	536.806	893.31	-61.8369	442.403	908.208	-76.9852	349.108	880.841	-69.7679	768.775	851.19	486.405	484.315	867.828	499.367	488.266	886.931	417.611	400.075	924.459	435.434	304.625	884.894	413.528
470	4.69	692.045	1395.72	176.34	735.449	1376.25	100.395	730.398	1361.43	249.229	802.066	1170.34	8.90306	777.411	1189.87	329.561	702.093	1154.43	156.183	807.02	855.337	-161.511	522.294	882.259	-145.153	536.786	893.33	-61.8379	442.419	908.237	-76.9884	349.076	880.858	-69.7671	768.78	851.187	486.376	484.39	867.837	499.35	488.285	886.962	417.627	400.069	924.486	435.419	304.643	884.901	413.513
471	4.7	691.967	1395.72	176.349	735.424	1376.28	100.387	730.39	1361.43	249.224	802.076	1170.34	8.91485	777.431	1189.88	329.56	702.812	1153.9	155.928	807.025	855.347	-161.492	522.314	882.288	-145.151	536.811	893.337	-61.8206	442.442	908.257	-76.9797	349.076	880.87	-69.7451	768.782	851.178	486.384	484.425	867.874	499.363	488.32	886.972	417.674	400.179	924.479	435.423	304.671	884.899	413.507
472	4.71	691.921	1395.7	176.321	735.376	1376.31	100.372	730.389	1361.43	249.216	802.095	1170.32	8.93137	777.451	1189.87	329.559	702.99	1153.75	155.844	807.058	855.361	-161.495	522.285	882.31	-145.155	536.774	893.361	-61.7962	442.444	908.245	-76.9764	349.072	880.867	-69.7497	768.775	851.159	486.388	484.445	867.866	499.392	488.399	886.937	417.682	400.232	924.475	435.43	304.708	884.885	413.529
473	4.72	691.954	1395.66	176.29	735.354	1376.27	100.388	730.373	1361.41	249.193	802.106	1170.3	8.92648	777.472	1189.85	329.543	703.029	1153.69	155.846	807.062	855.358	-161.508	522.264	882.297	-145.16	536.76	893.379	-61.7839	442.43	908.229	-76.9565	349.104	880.86	-69.7693	768.804	851.17	486.365	484.411	867.859	499.382	488.452	886.896	417.666	400.266	924.418	435.445	304.731	884.878	413.535
474	4.73	692.086	1395.6	176.238	735.344	1376.2	100.403	730.376	1361.37	249.169	802.122	1170.28	8.91186	777.485	1189.82	329.522	703.086	1153.62	155.829	807.04	855.351	-161.515	522.292	882.26	-145.172	536.774	893.366	-61.7942	442.445	908.199	-76.9744	349.12	880.85	-69.7801	768.829	851.179	486.33	484.477	867.836	499.362	488.443	886.862	417.655	400.301	924.376	435.471	304.72	884.854	413.53
475	4.74	692.128	1395.54	176.199	735.268	1376.15	100.399	730.377	1361.33	249.14	802.156	1170.25	8.89937	777.484	1189.79	329.503	703.139	1153.55	155.802	807.078	855.371	-161.533	522.307	882.225	-145.183	536.785	893.339	-61.8142	442.499	908.13	-77.0225	349.134	880.82	-69.7758	768.856	851.192	486.333	484.442	867.836	499.376	488.424	886.833	417.63	400.36	924.318	435.484	304.697	884.827	413.527
476	4.75	692.028	1395.51	176.194	735.152	1376.13	100.434	730.388	1361.31	249.145	802.166	1170.24	8.88374	777.493	1189.78	329.496	703.141	1153.52	155.796	807.136	855.379	-161.55	522.304	882.215	-145.175	536.772	893.351	-61.7974	442.522	908.094	-77.0331	349.13	880.814	-69.7612	768.872	851.189	486.335	484.355	867.816	499.361	488.25	887.134	417.37	400.351	924.317	435.486	304.696	884.812	413.546
477	4.76	691.896	1395.53	176.241	735.106	1376.12	100.428	730.371	1361.32	249.135	802.189	1170.26	8.87916	777.502	1189.8	329.502	703.11	1153.53	155.802	807.129	855.378	-161.564	522.284	882.242	-145.174	536.736	893.362	-61.7738	442.42	908.129	-76.9871	349.1	880.827	-69.7487	768.902	851.2	486.324	484.385	867.819	499.337	488.015	887.509	417.062	400.303	924.385	435.449	304.727	884.818	413.558
478	4.77	691.869	1395.55	176.226	735.147	1376.13	100.395	730.349	1361.35	249.095	802.171	1170.29	8.86774	777.515	1189.83	329.493	703.1	1153.56	155.774	807.111	855.38	-161.583	522.271	882.281	-145.168	536.764	893.359	-61.7802	442.377	908.184	-76.9562	349.066	880.841	-69.7401	768.906	851.221	486.289	484.415	867.856	499.354	488.255	887.083	417.486	400.278	924.399	435.441	304.692	884.848	413.545
479	4.78	691.864	1395.54	176.176	735.171	1376.13	100.344	730.342	1361.39	249.045	802.195	1170.31	8.84853	777.547	1189.88	329.472	703.052	1153.61	155.749	807.12	855.373	-161.6	522.316	882.303	-145.171	536.818	893.357	-61.8236	442.411	908.21	-76.9706	349.107	880.842	-69.7565	768.925	851.246	486.288	484.464	867.902	499.358	488.256	886.991	417.55	400.248	924.424	435.423	304.686	884.877	413.539
480	4.79	691.787	1395.56	176.155	735.211	1376.11	100.301	730.326	1361.41	249.001	802.226	1170.31	8.83122	777.581	1189.9	329.456	703.01	1153.63	155.714	807.117	855.369	-161.606	522.343	882.309	-145.172	536.838	893.36	-61.8214	442.446	908.233	-76.9828	349.18	880.832	-69.7713	768.929	851.255	486.308	484.479	867.936	499.366	488.122	887.261	417.311	400.158	924.489	435.408	304.68	884.895	413.551
481	4.8	691.753	1395.59	176.144	735.267	1376.11	100.255	730.277	1361.42	248.978	802.23	1170.31	8.8127	777.61	1189.92	329.444	702.968	1153.65	155.721	807.082	855.362	-161.6	522.317	882.294	-145.16	536.818	893.365	-61.821	442.447	908.223	-76.9879	349.15	880.835	-69.7481	768.906	851.257	486.291	484.468	867.927	499.369	487.944	887.632	417.036	400.153	924.468	435.422	304.671	884.911	413.553
482	4.81	691.909	1395.56	176.063	735.311	1376.1	100.21	730.272	1361.41	248.95	802.229	1170.29	8.7888	777.591	1189.92	329.426	702.952	1153.64	155.685	807.077	855.334	-161.599	522.302	882.267	-145.181	536.83	893.357	-61.8521	442.419	908.196	-76.9818	349.085	880.849	-69.7386	768.914	851.256	486.265	484.468	867.908	499.368	488.25	887.139	417.459	400.254	924.392	435.423	304.662	884.9	413.529
483	4.82	692.02	1395.54	176.042	735.311	1376.07	100.175	730.327	1361.39	248.912	802.235	1170.25	8.74696	777.577	1189.89	329.385	702.975	1153.61	155.619	807.062	855.293	-161.608	522.339	882.238	-145.222	536.887	893.325	-61.8736	442.427	908.185	-77.0168	349.133	880.795	-69.7677	768.896	851.242	486.25	484.462	867.906	499.373	488.378	886.987	417.563	400.278	924.371	435.4	304.678	884.868	413.511
484	4.83	692.105	1395.52	175.998	735.337	1376.05	100.151	730.399	1361.36	248.879	802.244	1170.22	8.71934	777.597	1189.87	329.357	702.947	1153.59	155.596	807.281	855.508	-161.419	522.343	882.215	-145.231	536.87	893.307	-61.8643	442.475	908.126	-77.0498	349.178	880.766	-69.782	768.88	851.244	486.256	484.436	867.881	499.369	488.416	886.931	417.593	400.302	924.336	435.415	304.727	884.834	413.526
485	4.84	692.035	1395.56	175.986	735.399	1376.07	100.144	730.415	1361.36	248.865	802.236	1170.2	8.71041	777.593	1189.87	329.353	702.898	1153.57	155.581	807.56	855.793	-161.18	522.318	882.205	-145.212	536.872	893.282	-61.858	442.512	908.113	-77.0415	349.174	880.769	-69.7804	768.888	851.255	486.272	484.469	867.86	499.36	488.41	886.916	417.623	400.305	924.319	435.444	304.736	884.815	413.534
486	4.85	692.142	1395.56	175.927	735.394	1376.08	100.133	730.44	1361.38	248.829	802.207	1170.2	8.68773	777.577	1189.9	329.357	702.858	1153.55	155.535	807.245	855.384	-161.503	522.282	882.219	-145.208	536.906	893.279	-61.8632	442.458	908.123	-77.0312	349.122	880.765	-69.7786	768.884	851.257	486.271	484.481	867.884	499.347	488.424	886.908	417.633	400.376	924.294	435.438	304.716	884.818	413.53
487	4.86	692.358	1395.58	175.878	735.392	1376.1	100.122	730.493	1361.42	248.776	802.205	1170.2	8.65999	777.583	1189.93	329.348	702.81	1153.54	155.507	807.167	855.289	-161.591	522.284	882.227	-145.215	536.903	893.289	-61.8654	442.456	908.135	-77.0285	349.124	880.78	-69.7924	768.868	851.279	486.276	484.52	867.917	499.362	488.361	886.936	417.618	400.361	924.319	435.445	304.743	884.831	413.524
488	4.87	692.372	1395.61	175.857	735.41	1376.13	100.098	730.508	1361.46	248.745	802.192	1170.2	8.66156	777.573	1189.96	329.352	702.78	1153.55	155.491	807.122	855.277	-161.593	522.286	882.235	-145.191	536.858	893.331	-61.8369	442.458	908.165	-76.9987	349.123	880.807	-69.7857	768.896	851.339	486.292	484.5	867.924	499.385	488.328	886.948	417.596	400.313	924.368	435.438	304.751	884.843	413.54
489	4.88	692.497	1395.62	175.818	735.378	1376.16	100.086	730.51	1361.51	248.705	802.158	1170.22	8.67897	777.521	1189.99	329.352	702.762	1153.57	155.508	807.081	855.272	-161.604	522.292	882.264	-145.168	536.836	893.354	-61.8306	442.47	908.176	-76.9979	349.085	880.83	-69.7477	768.9	851.374	486.287	484.481	867.922	499.394	488.345	886.968	417.595	400.295	924.417	435.421	304.718	884.862	413.55
490	4.89	692.693	1395.59	175.75	735.374	1376.16	100.071	730.516	1361.55	248.627	802.138	1170.23	8.66772	777.511	1190.01	329.334	702.695	1153.58	155.507	807.063	855.3	-161.614	522.276	882.292	-145.172	536.837	893.368	-61.8421	442.493	908.187	-77.0102	349.075	880.824	-69.7444	768.915	851.41	486.27	484.47	867.936	499.378	488.289	886.993	417.582	400.217	924.48	435.42	304.694	884.877	413.546
491	4.9	692.732	1395.57	175.678	735.399	1376.18	100.016	730.55	1361.57	248.565	802.135	1170.25	8.6653	777.494	1190.02	329.31	702.69	1153.57	155.474	807.065	855.31	-161.613	522.276	882.295	-145.187	536.802	893.379	-61.8428	442.476	908.192	-77.0182	349.086	880.833	-69.7632	768.899	851.43	486.262	484.467	867.962	499.369	488.238	887.023	417.544	400.221	924.451	435.424	304.648	884.886	413.526
492	4.91	692.731	1395.61	175.635	735.495	1376.21	99.9674	730.582	1361.58	248.528	802.14	1170.26	8.66937	777.5	1190	329.302	702.687	1153.56	155.474	807.042	855.32	-161.614	522.262	882.295	-145.207	536.784	893.375	-61.8426	442.425	908.215	-77.009	349.064	880.836	-69.7685	768.9	851.437	486.282	484.506	867.976	499.362	488.22	887.027	417.546	400.166	924.429	435.418	304.647	884.881	413.518
493	4.92	692.655	1395.66	175.632	735.543	1376.23	99.9587	730.602	1361.61	248.499	802.159	1170.26	8.66646	777.53	1190.01	329.293	702.693	1153.57	155.458	807.064	855.335	-161.631	522.241	882.308	-145.203	536.736	893.433	-61.8201	442.407	908.231	-77.0284	349.076	880.833	-69.7705	768.919	851.435	486.291	484.513	867.997	499.353	488.277	887.014	417.564	400.132	924.45	435.416	304.659	884.894	413.517
494	4.93	692.637	1395.71	175.61	735.566	1376.24	99.9558	730.652	1361.62	248.449	802.17	1170.26	8.65512	777.531	1190.01	329.294	702.638	1153.6	155.464	807.057	855.369	-161.673	522.222	882.318	-145.213	536.704	893.472	-61.8129	442.416	908.223	-77.0499	349.068	880.855	-69.7578	768.934	851.423	486.269	484.507	868.016	499.334	488.357	886.987	417.579	400.172	924.442	435.41	304.673	884.895	413.504
495	4.94	692.703	1395.75	175.557	735.712	1376.25	99.8709	730.681	1361.61	248.428	802.191	1170.25	8.64474	777.535	1190	329.282	702.572	1153.62	155.432	807.043	855.385	-161.693	522.22	882.335	-145.238	536.706	893.487	-61.8402	442.407	908.199	-77.0662	349.056	880.865	-69.7781	768.929	851.407	486.262	484.552	868.018	499.326	488.364	886.951	417.583	400.248	924.42	435.359	304.68	884.878	413.491
496	4.95	692.749	1395.75	175.516	735.841	1376.26	99.8363	730.71	1361.6	248.436	802.25	1170.25	8.64595	777.564	1189.96	329.281	702.639	1153.61	155.414	807.074	855.369	-161.702	522.212	882.366	-145.244	536.773	893.495	-61.8532	442.397	908.198	-77.0751	349.043	880.861	-69.7756	768.922	851.389	486.262	484.593	867.995	499.327	488.386	886.95	417.612	400.27	924.395	435.337	304.697	884.866	413.492
497	4.96	692.832	1395.72	175.526	735.825	1376.26	99.8751	730.796	1361.61	248.444	802.284	1170.26	8.66639	777.616	1189.95	329.287	702.709	1153.63	155.425	807.062	855.371	-161.746	522.185	882.382	-145.218	536.785	893.485	-61.8344	442.42	908.191	-77.0551	349.023	880.856	-69.7443	768.931	851.38	486.248	484.588	867.958	499.33	488.42	886.976	417.624	400.38	924.333	435.361	304.718	884.864	413.51
498	4.97	693.009	1395.69	175.529	735.88	1376.21	99.8912	730.839	1361.61	248.456	802.314	1170.28	8.67313	777.631	1189.98	329.293	702.714	1153.63	155.445	807.006	855.394	-161.772	522.183	882.39	-145.19	536.831	893.537	-61.8314	442.396	908.21	-77.0193	349.006	880.85	-69.7082	768.944	851.361	486.209	484.521	867.954	499.321	488.427	886.985	417.638	400.441	924.316	435.355	304.702	884.867	413.532
499	4.98	693.188	1395.65	175.512	736.026	1376.18	99.8695	730.827	1361.6	248.469	802.36	1170.3	8.67628	777.655	1189.98	329.292	702.682	1153.63	155.443	806.924	855.383	-161.768	522.193	882.366	-145.193	536.905	893.706	-61.8308	442.351	908.208	-76.9989	349	880.831	-69.7189	768.933	851.34	486.186	484.482	867.94	499.296	488.354	887.001	417.609	400.385	924.346	435.371	304.682	884.858	413.534
500	4.99	693.253	1395.63	175.54	736.124	1376.16	99.8816	730.841	1361.6	248.499	802.392	1170.32	8.67303	777.681	1189.95	329.289	702.713	1153.59	155.437	806.912	855.388	-161.777	522.216	882.341	-145.205	536.934	893.653	-61.8647	442.391	908.168	-77.028	349.025	880.825	-69.7595	768.934	851.334	486.188	484.459	867.932	499.299	488.302	887.007	417.578	400.216	924.429	435.357	304.657	884.844	413.514
501	5	693.244	1395.64	175.634	736.088	1376.2	99.951	730.885	1361.58	248.542	802.419	1170.31	8.69183	777.695	1189.95	329.301	702.758	1153.58	155.459	806.94	855.396	-161.776	522.256	882.323	-145.201	536.866	893.446	-61.864	442.396	908.143	-77.0178	349.079	880.802	-69.7472	768.952	851.34	486.179	484.411	867.953	499.307	488.262	887.005	417.558	400.142	924.453	435.376	304.651	884.86	413.515
502	5.01	693.172	1395.68	175.737	736.137	1376.24	100.016	730.947	1361.57	248.603	802.437	1170.32	8.6927	777.71	1189.94	329.301	702.737	1153.59	155.466	806.951	855.404	-161.781	522.238	882.324	-145.194	536.848	893.418	-61.8664	442.375	908.145	-77.0115	349.061	880.777	-69.7135	768.946	851.345	486.149	484.442	867.955	499.31	488.26	887.001	417.547	400.162	924.493	435.375	304.653	884.878	413.525
503	5.02	693.163	1395.72	175.81	736.195	1376.26	100.069	730.971	1361.56	248.633	802.448	1170.33	8.66333	777.72	1189.93	329.282	702.723	1153.6	155.42	806.955	855.427	-161.802	522.228	882.33	-145.213	536.86	893.424	-61.8782	442.423	908.139	-77.0467	349.039	880.786	-69.7499	768.955	851.356	486.141	484.491	867.988	499.332	488.24	887.011	417.526	400.217	924.494	435.358	304.644	884.894	413.515
504	5.03	693.192	1395.75	175.863	736.271	1376.31	100.091	731.065	1361.54	248.666	802.492	1170.31	8.65155	777.765	1189.92	329.261	702.802	1153.55	155.376	807.018	855.455	-161.799	522.247	882.331	-145.266	536.884	893.45	-61.9057	442.471	908.131	-77.0911	349.13	880.78	-69.8127	768.961	851.352	486.166	484.558	868.016	499.335	488.127	887.286	417.27	400.179	924.495	435.344	304.684	884.901	413.505
505	5.04	693.224	1395.75	175.923	736.295	1376.32	100.115	731.184	1361.51	248.722	802.524	1170.3	8.66498	777.835	1189.92	329.279	702.882	1153.54	155.396	807.038	855.446	-161.804	522.294	882.335	-145.262	536.899	893.453	-61.8939	442.494	908.128	-77.1	349.173	880.783	-69.8153	768.958	851.334	486.185	484.583	868.015	499.331	487.801	887.912	416.751	400.183	924.509	435.366	304.732	884.888	413.511
506	5.05	693.289	1395.76	175.98	736.349	1376.35	100.149	731.259	1361.51	248.788	802.525	1170.33	8.67124	777.845	1189.95	329.305	702.855	1153.6	155.427	807.205	855.675	-161.61	522.286	882.353	-145.231	536.859	893.468	-61.8772	442.454	908.169	-77.0886	349.11	880.807	-69.7782	768.959	851.326	486.18	484.575	867.996	499.328	487.879	887.774	416.877	400.295	924.467	435.363	304.746	884.885	413.525
507	5.06	693.246	1395.81	176.053	736.366	1376.37	100.181	731.29	1361.52	248.834	802.55	1170.35	8.68303	777.826	1189.98	329.32	702.8	1153.63	155.433	807.646	856.222	-161.211	522.218	882.383	-145.214	536.847	893.571	-61.8838	442.334	908.219	-77.0493	349.092	880.827	-69.761	768.959	851.335	486.179	484.568	867.973	499.335	488.068	887.466	417.17	400.343	924.389	435.358	304.735	884.88	413.524
508	5.07	693.168	1395.85	176.112	736.347	1376.4	100.222	731.32	1361.52	248.858	802.586	1170.35	8.70098	777.894	1189.98	329.325	702.796	1153.64	155.437	807.572	856.11	-161.268	522.224	882.403	-145.224	536.977	893.762	-61.8776	442.344	908.213	-77.0507	349.077	880.819	-69.745	768.976	851.337	486.194	484.575	867.961	499.329	487.794	887.968	416.759	400.384	924.319	435.368	304.76	884.869	413.526
509	5.08	693.251	1395.84	176.145	736.417	1376.4	100.234	731.386	1361.51	248.892	802.611	1170.34	8.72494	777.931	1189.98	329.345	702.809	1153.59	155.461	807.112	855.598	-161.64	522.241	882.395	-145.21	536.962	893.724	-61.8496	442.371	908.21	-77.035	349.073	880.826	-69.7228	769.007	851.358	486.232	484.582	867.963	499.338	487.925	887.799	416.918	400.457	924.272	435.394	304.79	884.843	413.538
510	5.09	693.253	1395.88	176.179	736.468	1376.43	100.261	731.421	1361.5	248.913	802.582	1170.33	8.7285	777.902	1189.98	329.347	702.818	1153.55	155.497	806.982	855.488	-161.746	522.206	882.389	-145.191	536.83	893.532	-61.8212	442.336	908.214	-76.9908	349.055	880.819	-69.713	768.985	851.36	486.221	484.542	867.96	499.358	488.351	887.19	417.461	400.39	924.288	435.413	304.775	884.844	413.543
511	5.1	693.223	1395.9	176.198	736.469	1376.45	100.267	731.413	1361.5	248.893	802.548	1170.32	8.72032	777.884	1189.97	329.326	702.811	1153.55	155.5	806.976	855.49	-161.794	522.179	882.39	-145.194	536.758	893.496	-61.8289	442.356	908.182	-76.9966	349.067	880.817	-69.7346	768.96	851.36	486.203	484.533	867.972	499.346	488.372	887.044	417.538	400.294	924.338	435.375	304.75	884.859	413.53
512	5.11	693.311	1395.87	176.191	736.456	1376.44	100.286	731.438	1361.51	248.892	802.518	1170.31	8.71333	777.878	1189.96	329.324	702.807	1153.53	155.491	806.984	855.508	-161.789	522.21	882.381	-145.229	536.734	893.497	-61.842	442.417	908.139	-77.0473	349.091	880.81	-69.7679	768.95	851.368	486.21	484.53	867.989	499.342	488.369	886.992	417.541	400.3	924.385	435.346	304.742	884.874	413.517
513	5.12	693.382	1395.87	176.193	736.459	1376.44	100.299	731.465	1361.53	248.896	802.488	1170.32	8.74166	777.888	1189.95	329.348	702.817	1153.52	155.532	806.986	855.519	-161.789	522.218	882.383	-145.222	536.765	893.473	-61.831	442.451	908.102	-77.056	349.08	880.804	-69.7536	768.935	851.368	486.228	484.482	868.004	499.353	488.19	887.291	417.324	400.277	924.44	435.361	304.697	884.892	413.511
514	5.13	693.372	1395.89	176.193	736.504	1376.46	100.272	731.468	1361.58	248.883	802.454	1170.36	8.77846	777.864	1189.96	329.372	702.851	1153.53	155.541	806.968	855.54	-161.795	522.18	882.405	-145.201	536.765	893.464	-61.8266	442.386	908.135	-77.0339	349.052	880.815	-69.7416	768.93	851.353	486.254	484.507	867.992	499.349	487.93	887.669	417.019	400.2	924.512	435.357	304.653	884.902	413.509
515	5.14	693.3	1395.93	176.188	736.541	1376.49	100.236	731.474	1361.6	248.858	802.419	1170.39	8.78331	777.831	1189.97	329.374	702.862	1153.54	155.519	806.962	855.58	-161.809	522.153	882.417	-145.212	536.758	893.474	-61.8412	442.365	908.164	-77.0475	349.04	880.831	-69.7469	768.916	851.338	486.249	484.585	868.006	499.342	488.168	887.183	417.412	400.156	924.512	435.348	304.656	884.901	413.501
516	5.15	693.353	1395.92	176.173	736.523	1376.48	100.22	731.485	1361.6	248.843	802.41	1170.4	8.7977	777.819	1189.96	329.384	702.82	1153.54	155.531	806.942	855.591	-161.848	522.157	882.413	-145.215	536.704	893.484	-61.8378	442.379	908.167	-77.0508	349.002	880.828	-69.7311	768.91	851.323	486.259	484.618	868.008	499.33	488.146	887.334	417.297	400.232	924.426	435.357	304.684	884.887	413.501
517	5.16	693.397	1395.93	176.179	736.552	1376.47	100.234	731.547	1361.59	248.86	802.418	1170.39	8.84956	777.838	1189.96	329.414	702.803	1153.52	155.58	806.868	855.573	-161.87	522.155	882.433	-145.201	536.683	893.488	-61.7984	442.381	908.147	-77.0304	348.999	880.821	-69.6976	768.92	851.307	486.288	484.553	867.962	499.335	488.041	887.623	417.051	400.382	924.363	435.341	304.735	884.848	413.526
518	5.17	693.422	1395.94	176.172	736.573	1376.45	100.253	731.609	1361.59	248.858	802.423	1170.4	8.86636	777.852	1189.96	329.434	702.836	1153.5	155.602	806.881	855.618	-161.88	522.173	882.434	-145.204	536.685	893.478	-61.7796	442.358	908.134	-77.0216	349.012	880.82	-69.7072	768.942	851.302	486.288	484.582	867.942	499.346	488.207	887.389	417.252	400.409	924.33	435.368	304.78	884.833	413.528
519	5.18	693.427	1395.95	176.14	736.59	1376.47	100.232	731.58	1361.6	248.849	802.434	1170.41	8.87051	777.83	1189.95	329.442	702.842	1153.48	155.624	807.122	855.907	-161.714	522.178	882.442	-145.213	536.683	893.497	-61.7972	442.377	908.145	-77.0495	349.002	880.815	-69.7005	768.928	851.286	486.292	484.596	867.909	499.345	488.057	887.62	417.055	400.481	924.277	435.366	304.784	884.833	413.521
520	5.19	693.561	1395.93	176.075	736.639	1376.48	100.203	731.515	1361.62	248.818	802.414	1170.42	8.87827	777.814	1189.96	329.458	702.801	1153.51	155.633	807.568	856.465	-161.325	522.157	882.462	-145.207	536.751	893.501	-61.8244	442.339	908.146	-77.0371	348.942	880.839	-69.6846	768.897	851.274	486.302	484.577	867.94	499.357	488.176	887.385	417.244	400.453	924.298	435.407	304.776	884.85	413.533
521	5.2	693.632	1395.93	176.076	736.644	1376.49	100.198	731.531	1361.64	248.82	802.388	1170.45	8.90087	777.836	1189.99	329.5	702.824	1153.52	155.639	807.685	856.642	-161.23	522.156	882.464	-145.189	536.745	893.523	-61.8209	442.36	908.139	-76.9968	348.946	880.845	-69.6789	768.888	851.281	486.324	484.568	867.961	499.368	487.827	887.939	416.813	400.427	924.302	435.453	304.759	884.861	413.542
522	5.21	693.606	1395.93	176.064	736.635	1376.49	100.192	731.545	1361.66	248.816	802.371	1170.47	8.90633	777.826	1190.02	329.52	702.859	1153.53	155.658	807.689	856.716	-161.232	522.148	882.485	-145.18	536.698	893.572	-61.8263	442.345	908.146	-76.9911	348.995	880.832	-69.6958	768.896	851.3	486.325	484.519	867.957	499.359	487.879	887.804	416.916	400.345	924.372	435.44	304.749	884.881	413.536
523	5.22	693.49	1395.95	176.046	736.572	1376.48	100.22	731.473	1361.69	248.793	802.342	1170.5	8.90107	777.801	1190.05	329.523	702.837	1153.52	155.655	807.669	856.744	-161.281	522.13	882.503	-145.19	536.715	893.644	-61.8306	442.302	908.145	-77.0077	348.979	880.845	-69.6987	768.872	851.327	486.316	484.458	867.956	499.345	488.16	887.21	417.404	400.279	924.392	435.394	304.692	884.911	413.532
524	5.23	693.538	1395.89	176.022	736.56	1376.46	100.243	731.414	1361.69	248.807	802.329	1170.5	8.89568	777.769	1190.06	329.54	702.818	1153.52	155.678	807.724	856.787	-161.295	522.099	882.494	-145.186	536.719	893.725	-61.8211	442.299	908.13	-77.0126	348.98	880.825	-69.6954	768.869	851.349	486.338	484.414	867.953	499.369	488.231	887.076	417.527	400.269	924.41	435.367	304.651	884.908	413.528
525	5.24	693.582	1395.85	176.04	736.542	1376.41	100.26	731.41	1361.66	248.835	802.333	1170.52	8.91239	777.785	1190.08	329.558	702.824	1153.53	155.697	807.75	856.839	-161.289	522.099	882.498	-145.17	536.666	893.589	-61.8105	442.331	908.13	-76.9829	348.966	880.821	-69.6707	768.874	851.374	486.371	484.412	867.955	499.377	488.12	887.307	417.333	400.13	924.466	435.383	304.648	884.891	413.536
526	5.25	693.392	1395.88	176.105	736.541	1376.39	100.252	731.374	1361.64	248.846	802.326	1170.53	8.90372	777.786	1190.11	329.575	702.826	1153.54	155.715	807.702	856.855	-161.31	522.102	882.494	-145.165	536.676	893.534	-61.7975	442.302	908.144	-76.9672	348.95	880.814	-69.6378	768.855	851.375	486.394	484.407	867.944	499.373	487.931	887.659	417.035	400.066	924.498	435.392	304.655	884.885	413.544
527	5.26	693.254	1395.9	176.158	736.481	1376.39	100.253	731.341	1361.62	248.839	802.308	1170.54	8.89889	777.757	1190.14	329.585	702.752	1153.62	155.713	807.693	856.867	-161.35	522.048	882.505	-145.166	536.627	893.55	-61.7891	442.256	908.139	-76.9459	348.921	880.819	-69.6242	768.853	851.374	486.39	484.435	867.961	499.352	488.201	887.164	417.464	400.189	924.456	435.396	304.629	884.882	413.545
528	5.27	693.257	1395.9	176.157	736.476	1376.41	100.233	731.362	1361.59	248.826	802.321	1170.54	8.88565	777.784	1190.15	329.576	702.705	1153.65	155.698	807.692	856.87	-161.356	522.078	882.501	-145.196	536.648	893.567	-61.7909	442.333	908.098	-76.9738	348.963	880.809	-69.6394	768.869	851.4	486.389	484.494	867.987	499.365	488.318	887.025	417.558	400.204	924.427	435.389	304.658	884.871	413.523
529	5.28	693.333	1395.86	176.126	736.439	1376.42	100.216	731.429	1361.55	248.83	802.356	1170.53	8.85172	777.828	1190.16	329.555	702.838	1153.64	155.66	807.686	856.858	-161.352	522.137	882.478	-145.229	536.682	893.557	-61.8143	442.424	908.072	-77.0244	349.026	880.792	-69.6826	768.878	851.408	486.411	484.584	868.02	499.377	488.234	887.285	417.347	400.273	924.375	435.389	304.734	884.863	413.505
530	5.29	693.31	1395.85	176.145	736.406	1376.39	100.207	731.432	1361.52	248.846	802.354	1170.55	8.83428	777.813	1190.18	329.539	702.871	1153.66	155.618	807.634	856.825	-161.387	522.093	882.491	-145.229	536.699	893.555	-61.8603	442.423	908.087	-77.0433	349.016	880.815	-69.6977	768.865	851.421	486.43	484.607	868.054	499.372	488.028	887.658	417.07	400.353	924.371	435.373	304.759	884.854	413.517
531	5.3	693.276	1395.86	176.164	736.337	1376.4	100.2	731.435	1361.52	248.839	802.346	1170.58	8.81	777.773	1190.22	329.537	702.796	1153.72	155.61	807.583	856.814	-161.448	522.045	882.52	-145.214	536.757	893.627	-61.8909	442.372	908.128	-77.0057	348.941	880.826	-69.6806	768.851	851.437	486.424	484.575	868.02	499.369	488.077	887.464	417.262	400.402	924.349	435.36	304.735	884.855	413.528
532	5.31	693.334	1395.8	176.121	736.327	1376.37	100.213	731.446	1361.5	248.833	802.357	1170.59	8.77048	777.771	1190.26	329.514	702.76	1153.76	155.607	807.576	856.813	-161.476	522.069	882.517	-145.228	536.895	893.807	-61.898	442.358	908.142	-76.983	348.932	880.81	-69.69	768.846	851.47	486.426	484.545	867.998	499.374	487.737	887.995	416.783	400.364	924.329	435.384	304.735	884.846	413.525
533	5.32	693.307	1395.79	176.126	736.342	1376.34	100.218	731.419	1361.5	248.856	802.369	1170.6	8.74078	777.771	1190.29	329.505	702.734	1153.78	155.592	807.598	856.827	-161.48	522.1	882.501	-145.237	536.909	893.765	-61.8966	442.343	908.117	-76.9699	348.969	880.782	-69.7005	768.822	851.509	486.442	484.51	868.029	499.386	487.868	887.851	416.913	400.318	924.345	435.425	304.74	884.842	413.524
534	5.33	693.34	1395.77	176.14	736.295	1376.33	100.23	731.391	1361.5	248.85	802.347	1170.61	8.71513	777.746	1190.32	329.502	702.672	1153.81	155.573	807.585	856.838	-161.488	522.058	882.5	-145.228	536.826	893.679	-61.8908	442.348	908.096	-76.9906	348.958	880.778	-69.69	768.823	851.562	486.468	484.473	868.044	499.381	488.238	887.275	417.443	400.313	924.371	435.421	304.687	884.855	413.528
535	5.34	693.296	1395.78	176.159	736.229	1376.32	100.23	731.366	1361.47	248.809	802.34	1170.62	8.66449	777.731	1190.35	329.48	702.677	1153.82	155.544	807.61	856.867	-161.509	522.022	882.504	-145.214	536.815	893.738	-61.8566	442.319	908.117	-76.9891	348.953	880.766	-69.6664	768.82	851.635	486.466	484.441	868.037	499.396	488.13	887.407	417.298	400.226	924.395	435.384	304.629	884.873	413.517
536	5.35	693.255	1395.77	176.135	736.215	1376.35	100.203	731.382	1361.47	248.763	802.366	1170.63	8.60883	777.762	1190.38	329.453	702.706	1153.86	155.532	807.611	856.885	-161.549	522.053	882.503	-145.224	536.73	893.6	-61.8461	442.316	908.091	-76.9722	348.968	880.785	-69.6536	768.82	851.685	486.452	484.487	868.063	499.383	487.789	888.013	416.796	400.122	924.448	435.41	304.644	884.883	413.509
537	5.36	693.255	1395.74	176.125	736.175	1376.35	100.2	731.378	1361.45	248.734	802.369	1170.62	8.57524	777.759	1190.41	329.435	702.717	1153.9	155.515	807.602	856.886	-161.575	522.036	882.507	-145.221	536.661	893.596	-61.84	442.296	908.101	-76.9676	348.958	880.81	-69.6425	768.842	851.739	486.466	484.529	868.098	499.367	487.889	887.896	416.938	400.158	924.484	435.395	304.624	884.884	413.517
538	5.37	693.196	1395.76	176.112	736.083	1376.36	100.186	731.329	1361.43	248.691	802.351	1170.62	8.53864	777.761	1190.46	329.422	702.702	1153.93	155.467	807.541	856.862	-161.592	521.977	882.517	-145.221	536.596	893.625	-61.8312	442.233	908.136	-76.9779	348.919	880.829	-69.6564	768.844	851.802	486.482	484.558	868.139	499.376	488.036	887.557	417.195	400.177	924.473	435.382	304.627	884.881	413.515
539	5.38	693.207	1395.75	176.07	736.056	1376.36	100.142	731.329	1361.43	248.64	802.354	1170.62	8.48267	777.756	1190.49	329.403	702.644	1153.94	155.424	807.516	856.858	-161.646	521.975	882.527	-145.235	536.584	893.643	-61.8516	442.248	908.143	-77.0022	348.871	880.842	-69.6622	768.869	851.858	486.468	484.543	868.14	499.373	487.702	888.026	416.759	400.174	924.45	435.373	304.661	884.869	413.502
540	5.39	693.153	1395.74	176.008	736.046	1376.34	100.122	731.365	1361.4	248.577	802.389	1170.61	8.44367	777.756	1190.51	329.354	702.633	1153.95	155.361	807.518	856.85	-161.655	521.985	882.523	-145.262	536.593	893.634	-61.8785	442.271	908.142	-77.017	348.887	880.84	-69.6626	768.906	851.902	486.454	484.57	868.151	499.362	487.657	888.144	416.633	400.27	924.375	435.359	304.675	884.854	413.499
541	5.4	693.195	1395.72	175.938	736.014	1376.33	100.115	731.378	1361.39	248.523	802.403	1170.6	8.43033	777.749	1190.53	329.337	702.654	1153.99	155.348	807.488	856.837	-161.662	521.994	882.52	-145.263	536.617	893.625	-61.8956	442.284	908.15	-76.9951	348.914	880.824	-69.6648	768.901	851.924	486.472	484.565	868.132	499.353	487.653	888.161	416.598	400.413	924.253	435.36	304.677	884.833	413.493
542	5.41	693.2	1395.7	175.912	735.916	1376.31	100.11	731.365	1361.4	248.477	802.383	1170.61	8.39717	777.752	1190.58	329.338	702.595	1154.05	155.353	807.469	856.831	-161.701	521.962	882.535	-145.256	536.673	893.715	-61.8841	442.263	908.16	-76.9715	348.883	880.844	-69.6336	768.897	851.962	486.474	484.538	868.118	499.367	487.845	887.901	416.873	400.4	924.249	435.339	304.67	884.828	413.507
543	5.42	693.216	1395.69	175.876	735.895	1376.31	100.049	731.381	1361.43	248.404	802.399	1170.63	8.35075	777.77	1190.62	329.311	702.565	1154.1	155.329	807.468	856.855	-161.742	521.954	882.55	-145.261	536.757	893.827	-61.9032	442.265	908.172	-76.9496	348.886	880.839	-69.6271	768.891	852.025	486.435	484.552	868.111	499.354	488.08	887.572	417.227	400.304	924.302	435.354	304.665	884.843	413.508
544	5.43	693.345	1395.64	175.802	735.912	1376.29	100	731.406	1361.44	248.311	802.381	1170.63	8.30236	777.781	1190.66	329.267	702.618	1154.09	155.277	807.453	856.851	-161.809	521.976	882.556	-145.255	536.718	893.692	-61.9254	442.293	908.183	-76.9678	348.875	880.84	-69.6328	768.879	852.083	486.404	484.58	868.129	499.356	487.753	888.072	416.783	400.168	924.425	435.364	304.663	884.851	413.507
545	5.44	693.44	1395.62	175.745	735.954	1376.29	99.9587	731.408	1361.45	248.206	802.361	1170.6	8.24244	777.76	1190.69	329.218	702.611	1154.11	155.246	807.427	856.809	-161.847	521.998	882.541	-145.272	536.751	893.738	-61.9436	442.299	908.161	-76.9854	348.908	880.834	-69.6364	768.856	852.147	486.411	484.553	868.168	499.39	487.624	888.224	416.654	400.085	924.506	435.365	304.646	884.861	413.533
546	5.45	693.351	1395.63	175.708	735.98	1376.26	99.8984	731.439	1361.47	248.122	802.331	1170.59	8.17515	777.757	1190.71	329.176	702.606	1154.14	155.192	807.408	856.789	-161.889	521.986	882.53	-145.286	536.761	893.81	-61.9235	442.29	908.121	-76.9969	348.954	880.817	-69.6657	768.866	852.223	486.42	484.553	868.197	499.367	487.603	888.282	416.613	400.116	924.502	435.341	304.62	884.877	413.531
547	5.46	693.416	1395.6	175.635	735.96	1376.22	99.8343	731.429	1361.48	248.052	802.306	1170.58	8.11	777.761	1190.74	329.14	702.633	1154.16	155.132	807.352	856.748	-161.962	521.965	882.532	-145.283	536.734	893.667	-61.9516	442.312	908.085	-77.0151	348.957	880.806	-69.682	768.837	852.271	486.396	484.564	868.216	499.349	487.558	888.318	416.608	400.076	924.52	435.321	304.608	884.891	413.517
548	5.47	693.624	1395.53	175.541	735.961	1376.2	99.7862	731.442	1361.47	247.982	802.316	1170.55	8.06339	777.773	1190.78	329.088	702.671	1154.14	155.077	807.332	856.72	-161.998	521.955	882.507	-145.303	536.793	893.602	-61.991	442.341	908.069	-77.013	348.929	880.78	-69.6735	768.823	852.333	486.376	484.576	868.236	499.358	487.553	888.327	416.6	400.045	924.513	435.332	304.595	884.879	413.491
549	5.48	693.694	1395.5	175.433	736.058	1376.21	99.6877	731.495	1361.45	247.893	802.317	1170.51	8.00464	777.796	1190.81	329.04	702.684	1154.16	155.016	807.278	856.67	-162.017	521.978	882.47	-145.329	536.814	893.568	-62.0184	442.322	908.052	-77.023	348.952	880.761	-69.6689	768.83	852.403	486.399	484.615	868.256	499.362	487.605	888.309	416.58	399.968	924.527	435.334	304.563	884.875	413.484
550	5.49	693.605	1395.52	175.378	736.096	1376.19	99.6095	731.525	1361.44	247.825	802.293	1170.48	7.95268	777.813	1190.83	328.999	702.614	1154.2	154.978	807.255	856.625	-162.018	521.981	882.462	-145.358	536.802	893.56	-62.032	442.316	908.076	-77.0418	348.921	880.784	-69.6955	768.823	852.46	486.4	484.619	868.269	499.365	487.583	888.303	416.583	400.068	924.456	435.323	304.592	884.849	413.482
551	5.5	693.475	1395.56	175.364	736.13	1376.19	99.557	731.579	1361.45	247.789	802.302	1170.46	7.9167	777.822	1190.89	328.967	702.527	1154.26	154.977	807.252	856.597	-162.03	521.931	882.488	-145.329	536.801	893.66	-62.0193	442.272	908.122	-77.003	348.892	880.804	-69.6918	768.865	852.551	486.394	484.683	868.285	499.359	487.565	888.294	416.602	400.135	924.397	435.304	304.621	884.827	413.497
552	5.51	693.536	1395.56	175.32	736.127	1376.22	99.535	731.604	1361.46	247.745	802.318	1170.45	7.87345	777.805	1190.96	328.938	702.513	1154.28	154.922	807.275	856.578	-162.039	521.905	882.507	-145.312	536.799	893.786	-61.9853	442.279	908.128	-77.0135	348.875	880.814	-69.6579	768.852	852.62	486.398	484.711	868.268	499.346	487.578	888.28	416.59	400.231	924.371	435.308	304.624	884.82	413.509
553	5.52	693.632	1395.56	175.226	736.129	1376.22	99.4942	731.635	1361.45	247.687	802.329	1170.45	7.8113	777.832	1190.99	328.865	702.528	1154.28	154.837	807.295	856.558	-162.036	521.933	882.511	-145.341	536.752	893.654	-61.9874	442.312	908.13	-77.0424	348.916	880.825	-69.6736	768.835	852.693	486.42	484.697	868.292	499.357	487.652	888.3	416.593	400.34	924.303	435.319	304.648	884.822	413.494
554	5.53	693.663	1395.59	175.176	736.155	1376.24	99.4176	731.655	1361.45	247.619	802.299	1170.44	7.73585	777.868	1191.05	328.799	702.516	1154.29	154.769	807.246	856.526	-162.04	521.937	882.507	-145.355	536.766	893.636	-62.0225	442.295	908.135	-77.0506	348.915	880.841	-69.6799	768.819	852.787	486.437	484.75	868.341	499.365	487.655	888.32	416.6	400.369	924.256	435.286	304.646	884.824	413.473
555	5.54	693.658	1395.61	175.11	736.139	1376.26	99.3553	731.665	1361.45	247.564	802.232	1170.44	7.67327	777.862	1191.12	328.764	702.431	1154.33	154.727	807.219	856.502	-162.078	521.886	882.513	-145.345	536.743	893.649	-62.0304	442.227	908.158	-77.0514	348.883	880.843	-69.6646	768.792	852.899	486.425	484.724	868.351	499.34	487.615	888.34	416.603	400.299	924.303	435.299	304.619	884.82	413.471
556	5.55	693.669	1395.63	175.039	736.165	1376.28	99.2967	731.715	1361.48	247.531	802.202	1170.44	7.6354	777.813	1191.19	328.742	702.393	1154.36	154.68	807.197	856.487	-162.105	521.859	882.522	-145.333	536.749	893.632	-62.0247	442.175	908.162	-77.0207	348.861	880.84	-69.637	768.744	853.026	486.419	484.669	868.382	499.328	487.556	888.375	416.591	400.255	924.336	435.293	304.586	884.846	413.479
557	5.56	693.753	1395.64	174.956	736.236	1376.26	99.2272	731.795	1361.53	247.466	802.178	1170.43	7.58986	777.809	1191.24	328.709	702.335	1154.38	154.629	807.186	856.458	-162.118	521.863	882.518	-145.34	536.735	893.631	-62.0531	442.179	908.185	-76.9871	348.854	880.844	-69.6499	768.727	853.138	486.422	484.653	868.398	499.337	487.509	888.406	416.577	400.198	924.398	435.299	304.568	884.845	413.481
558	5.57	693.881	1395.63	174.901	736.268	1376.28	99.1804	731.822	1361.56	247.402	802.158	1170.43	7.5408	777.827	1191.28	328.667	702.315	1154.39	154.588	807.219	856.478	-162.113	521.896	882.494	-145.353	536.715	893.64	-62.053	442.228	908.178	-77.0107	348.9	880.821	-69.6697	768.75	853.229	486.425	484.611	868.4	499.335	487.533	888.425	416.579	400.039	924.483	435.325	304.557	884.845	413.472
559	5.58	693.985	1395.64	174.861	736.187	1376.31	99.17	731.852	1361.56	247.362	802.131	1170.42	7.51771	777.827	1191.32	328.632	702.34	1154.4	154.593	807.199	856.48	-162.146	521.882	882.482	-145.364	536.691	893.658	-62.0248	442.217	908.188	-76.9934	348.875	880.817	-69.6531	768.738	853.305	486.401	484.625	868.4	499.34	487.569	888.438	416.568	400.002	924.529	435.333	304.57	884.851	413.478
560	5.59	694.105	1395.64	174.79	736.207	1376.32	99.1413	731.918	1361.59	247.324	802.117	1170.42	7.50934	777.809	1191.35	328.598	702.331	1154.42	154.577	807.176	856.442	-162.184	521.865	882.484	-145.351	536.668	893.669	-62.0056	442.219	908.179	-77.0008	348.847	880.819	-69.6525	768.712	853.369	486.4	484.691	868.428	499.332	487.528	888.442	416.56	400.031	924.522	435.331	304.552	884.851	413.493
561	5.6	694.087	1395.65	174.704	736.296	1376.29	99.0784	731.997	1361.6	247.267	802.12	1170.41	7.48154	777.823	1191.37	328.555	702.34	1154.44	154.546	807.156	856.439	-162.183	521.87	882.488	-145.362	536.687	893.674	-62.02	442.246	908.121	-77.0335	348.883	880.814	-69.6845	768.693	853.417	486.409	484.707	868.455	499.333	487.523	888.43	416.566	400.056	924.477	435.296	304.555	884.854	413.483
562	5.61	694.035	1395.68	174.644	736.389	1376.32	99.0268	732.066	1361.61	247.216	802.133	1170.41	7.46114	777.835	1191.36	328.522	702.36	1154.44	154.512	807.154	856.44	-162.184	521.878	882.478	-145.378	536.689	893.678	-62.0319	442.256	908.118	-77.0511	348.914	880.792	-69.7152	768.697	853.44	486.392	484.73	868.456	499.33	487.531	888.426	416.554	400.179	924.405	435.281	304.568	884.845	413.458
563	5.62	694.079	1395.71	174.609	736.451	1376.33	98.9797	732.146	1361.62	247.218	802.171	1170.43	7.44501	777.85	1191.37	328.5	702.362	1154.47	154.495	807.121	856.418	-162.196	521.854	882.505	-145.376	536.692	893.677	-62.0455	442.221	908.144	-77.0531	348.883	880.802	-69.6976	768.674	853.429	486.379	484.762	868.455	499.338	487.546	888.417	416.554	400.208	924.385	435.301	304.587	884.82	413.457
564	5.63	694.128	1395.73	174.596	736.521	1376.32	98.9698	732.183	1361.61	247.242	802.22	1170.45	7.453	777.86	1191.39	328.499	702.365	1154.5	154.486	807.061	856.422	-162.22	521.825	882.539	-145.36	536.73	893.788	-62.0326	442.207	908.183	-77.041	348.841	880.811	-69.6746	768.648	853.425	486.379	484.741	868.456	499.342	487.567	888.422	416.577	400.243	924.359	435.332	304.581	884.814	413.484
565	5.64	694.054	1395.74	174.603	736.617	1376.32	98.9357	732.225	1361.62	247.234	802.255	1170.47	7.45185	777.867	1191.41	328.496	702.279	1154.57	154.487	807.1	856.469	-162.245	521.813	882.56	-145.366	536.876	893.985	-62.0495	442.205	908.208	-77.0454	348.768	880.826	-69.6657	768.676	853.469	486.378	484.745	868.456	499.336	487.587	888.436	416.576	400.217	924.34	435.311	304.556	884.816	413.48
566	5.65	694.098	1395.73	174.604	736.699	1376.33	98.9164	732.289	1361.64	247.225	802.298	1170.5	7.44287	777.887	1191.42	328.474	702.266	1154.61	154.474	807.066	856.48	-162.261	521.796	882.574	-145.38	536.808	893.946	-62.0483	442.173	908.227	-77.0444	348.814	880.81	-69.675	768.678	853.498	486.371	484.69	868.45	499.313	487.53	888.435	416.566	400.114	924.391	435.265	304.513	884.814	413.472
567	5.66	694.321	1395.7	174.608	736.756	1376.34	98.9351	732.347	1361.63	247.224	802.343	1170.52	7.4389	777.909	1191.42	328.462	702.334	1154.59	154.452	807.057	856.519	-162.276	521.788	882.573	-145.382	536.723	893.868	-62.0435	442.174	908.217	-77.0171	348.839	880.79	-69.6717	768.656	853.535	486.353	484.636	868.452	499.323	487.5	888.449	416.565	400.131	924.423	435.279	304.479	884.837	413.484
568	5.67	694.415	1395.69	174.624	736.834	1376.34	98.963	732.379	1361.61	247.239	802.387	1170.54	7.43564	777.967	1191.42	328.461	702.431	1154.56	154.45	807.087	856.573	-162.303	521.798	882.57	-145.364	536.795	894.02	-62.0349	442.184	908.207	-77.0152	348.812	880.8	-69.6381	768.67	853.577	486.341	484.677	868.498	499.346	487.5	888.454	416.551	399.974	924.526	435.27	304.449	884.87	413.489
569	5.68	694.468	1395.71	174.676	736.977	1376.35	98.9739	732.399	1361.63	247.242	802.389	1170.55	7.42496	778.007	1191.42	328.443	702.447	1154.6	154.449	807.058	856.597	-162.308	521.817	882.565	-145.376	536.769	893.965	-62.0449	442.261	908.172	-77.0457	348.82	880.811	-69.6406	768.645	853.592	486.323	484.678	868.506	499.353	487.482	888.474	416.523	399.794	924.629	435.266	304.414	884.898	413.476
570	5.69	694.554	1395.69	174.687	737.03	1376.37	99.0018	732.448	1361.64	247.239	802.42	1170.56	7.41438	778.027	1191.42	328.43	702.476	1154.61	154.43	807.024	856.603	-162.322	521.804	882.558	-145.407	536.7	893.809	-62.0797	442.26	908.13	-77.0723	348.863	880.81	-69.6788	768.626	853.579	486.295	484.656	868.496	499.355	487.478	888.482	416.499	399.788	924.631	435.256	304.405	884.905	413.464
571	5.7	694.692	1395.66	174.715	737.093	1376.4	99.0319	732.538	1361.61	247.263	802.473	1170.56	7.41754	778.067	1191.41	328.418	702.534	1154.62	154.403	807.045	856.608	-162.32	521.799	882.565	-145.422	536.668	893.795	-62.0819	442.231	908.125	-77.0729	348.854	880.814	-69.6663	768.663	853.573	486.287	484.663	868.489	499.354	487.536	888.491	416.536	399.849	924.567	435.272	304.437	884.879	413.464
572	5.71	694.8	1395.66	174.827	737.154	1376.45	99.1002	732.638	1361.59	247.316	802.54	1170.57	7.45097	778.12	1191.4	328.434	702.538	1154.64	154.415	807.096	856.617	-162.306	521.799	882.585	-145.403	536.756	893.859	-62.0705	442.221	908.134	-77.0587	348.858	880.832	-69.6572	768.696	853.542	486.281	484.721	868.474	499.361	487.518	888.486	416.55	399.973	924.482	435.284	304.472	884.855	413.472
573	5.72	694.848	1395.66	174.87	737.191	1376.46	99.147	732.707	1361.56	247.363	802.586	1170.54	7.46478	778.159	1191.36	328.435	702.526	1154.65	154.416	807.124	856.622	-162.301	521.788	882.591	-145.404	536.839	894.032	-62.0733	442.194	908.178	-77.0463	348.88	880.828	-69.6808	768.745	853.465	486.283	484.726	868.44	499.356	487.523	888.441	416.547	400.115	924.39	435.302	304.514	884.814	413.489
574	5.73	694.97	1395.66	174.931	737.261	1376.49	99.1833	732.784	1361.54	247.419	802.626	1170.53	7.46975	778.202	1191.35	328.428	702.508	1154.67	154.422	807.126	856.602	-162.301	521.788	882.582	-145.407	536.785	893.988	-62.0753	442.177	908.176	-77.065	348.831	880.828	-69.6852	768.768	853.404	486.27	484.705	868.406	499.331	487.539	888.407	416.566	400.264	924.298	435.264	304.551	884.793	413.479
575	5.74	695.073	1395.68	175.036	737.32	1376.53	99.2519	732.907	1361.53	247.483	802.676	1170.52	7.48096	778.255	1191.36	328.435	702.531	1154.68	154.441	807.152	856.601	-162.273	521.834	882.577	-145.396	536.693	893.815	-62.0591	442.202	908.168	-77.0598	348.858	880.835	-69.6713	768.794	853.388	486.251	484.741	868.404	499.301	487.567	888.402	416.58	400.347	924.247	435.265	304.603	884.785	413.47
576	5.75	695.121	1395.7	175.091	737.407	1376.57	99.3133	732.959	1361.52	247.529	802.712	1170.5	7.51437	778.252	1191.36	328.451	702.601	1154.66	154.457	807.165	856.578	-162.273	521.855	882.575	-145.387	536.725	893.859	-62.0514	442.209	908.165	-77.0524	348.905	880.819	-69.662	768.806	853.382	486.263	484.778	868.438	499.324	487.54	888.391	416.574	400.28	924.319	435.283	304.616	884.781	413.49
577	5.76	695.076	1395.76	175.16	737.441	1376.62	99.3401	732.989	1361.55	247.561	802.702	1170.51	7.53781	778.218	1191.34	328.457	702.572	1154.67	154.458	807.151	856.56	-162.252	521.847	882.571	-145.396	536.823	893.96	-62.0678	442.238	908.161	-77.0853	348.884	880.831	-69.6712	768.758	853.365	486.269	484.769	868.465	499.345	487.511	888.395	416.56	400.102	924.434	435.253	304.574	884.801	413.492
578	5.77	695.12	1395.77	175.23	737.485	1376.63	99.3728	733.053	1361.58	247.587	802.682	1170.51	7.53569	778.221	1191.31	328.458	702.563	1154.67	154.459	807.14	856.567	-162.253	521.843	882.563	-145.414	536.718	893.821	-62.081	442.215	908.163	-77.1206	348.874	880.833	-69.7189	768.744	853.372	486.238	484.732	868.481	499.344	487.719	888.156	416.793	400.013	924.463	435.278	304.535	884.832	413.481
579	5.78	695.128	1395.82	175.277	737.53	1376.67	99.4296	733.116	1361.6	247.618	802.677	1170.51	7.54255	778.247	1191.3	328.467	702.607	1154.68	154.493	807.149	856.567	-162.242	521.859	882.547	-145.409	536.688	893.777	-62.0786	442.223	908.117	-77.1189	348.914	880.806	-69.7279	768.732	853.349	486.209	484.737	868.495	499.321	487.921	887.833	417.091	399.978	924.533	435.292	304.523	884.858	413.468
580	5.79	695.082	1395.87	175.367	737.581	1376.71	99.4697	733.167	1361.62	247.678	802.668	1170.51	7.57013	778.247	1191.27	328.504	702.674	1154.66	154.548	807.155	856.57	-162.207	521.865	882.539	-145.387	536.693	893.77	-62.0607	442.241	908.109	-77.0933	348.875	880.802	-69.7022	768.712	853.308	486.213	484.689	868.455	499.325	487.577	888.291	416.686	399.854	924.603	435.311	304.502	884.873	413.482
581	5.8	695.058	1395.89	175.416	737.607	1376.71	99.5135	733.184	1361.64	247.722	802.625	1170.5	7.59649	778.219	1191.24	328.536	702.684	1154.62	154.565	807.112	856.557	-162.173	521.859	882.546	-145.388	536.735	893.829	-62.056	442.194	908.119	-77.1061	348.836	880.798	-69.7096	768.688	853.246	486.233	484.602	868.405	499.343	487.645	888.129	416.822	399.767	924.652	435.315	304.447	884.875	413.485
582	5.81	695.031	1395.93	175.44	737.652	1376.71	99.5819	733.25	1361.67	247.77	802.598	1170.51	7.60834	778.185	1191.2	328.54	702.627	1154.6	154.621	807.116	856.566	-162.142	521.832	882.543	-145.393	536.826	894.007	-62.0598	442.201	908.123	-77.1127	348.824	880.786	-69.7204	768.685	853.171	486.234	484.558	868.399	499.357	487.888	887.818	417.127	399.9	924.559	435.304	304.439	884.875	413.479
583	5.82	694.975	1396	175.498	737.673	1376.77	99.6346	733.293	1361.67	247.836	802.629	1170.52	7.66448	778.174	1191.18	328.583	702.583	1154.62	154.665	807.166	856.591	-162.122	521.849	882.555	-145.376	536.872	894.072	-62.0465	442.197	908.137	-77.0665	348.795	880.794	-69.6786	768.72	853.085	486.226	484.599	868.401	499.355	487.607	888.262	416.713	400.01	924.49	435.307	304.485	884.864	413.489
584	5.83	694.857	1396.06	175.59	737.688	1376.81	99.7464	733.358	1361.68	247.932	802.639	1170.51	7.74386	778.184	1191.16	328.656	702.6	1154.65	154.714	807.212	856.611	-162.072	521.843	882.583	-145.324	536.907	894.113	-62.0171	442.199	908.165	-77.0259	348.783	880.814	-69.6424	768.754	852.987	486.258	484.672	868.392	499.368	487.586	888.352	416.627	400.126	924.431	435.296	304.546	884.851	413.506
585	5.84	694.721	1396.15	175.678	737.74	1376.87	99.8003	733.399	1361.68	247.997	802.626	1170.51	7.80024	778.173	1191.11	328.703	702.651	1154.62	154.733	807.229	856.595	-162.024	521.823	882.602	-145.315	536.903	894.124	-62.0174	442.183	908.202	-77.0438	348.782	880.861	-69.637	768.768	852.914	486.299	484.66	868.362	499.361	487.584	888.365	416.628	400.264	924.351	435.335	304.583	884.84	413.517
586	5.85	694.764	1396.15	175.699	737.769	1376.91	99.8378	733.436	1361.66	248.059	802.614	1170.5	7.81374	778.159	1191.05	328.703	702.698	1154.55	154.736	807.213	856.59	-162.026	521.815	882.594	-145.349	536.776	894.058	-62.027	442.12	908.205	-77.073	348.77	880.877	-69.6923	768.78	852.837	486.287	484.688	868.361	499.357	487.588	888.359	416.606	400.215	924.371	435.327	304.599	884.818	413.505
587	5.86	694.747	1396.15	175.776	737.859	1376.93	99.8998	733.475	1361.65	248.117	802.598	1170.48	7.83207	778.147	1191	328.703	702.693	1154.53	154.761	807.198	856.634	-162.02	521.827	882.598	-145.37	536.62	893.877	-62.0187	442.13	908.177	-77.0899	348.78	880.844	-69.7183	768.812	852.78	486.261	484.691	868.362	499.365	487.619	888.346	416.587	400.226	924.363	435.309	304.603	884.811	413.479
588	5.87	694.652	1396.19	175.912	737.893	1376.97	100.005	733.477	1361.63	248.2	802.596	1170.48	7.89659	778.147	1190.96	328.746	702.685	1154.52	154.82	807.232	856.683	-161.986	521.852	882.595	-145.348	536.542	893.834	-61.9843	442.172	908.154	-77.0835	348.763	880.838	-69.6857	768.808	852.733	486.299	484.696	868.359	499.378	487.545	888.324	416.562	400.231	924.332	435.337	304.587	884.815	413.473
589	5.88	694.391	1396.3	176.092	737.858	1377	100.116	733.415	1361.63	248.33	802.571	1170.51	7.94408	778.115	1190.94	328.792	702.675	1154.51	154.868	807.284	856.724	-161.968	521.786	882.621	-145.307	536.559	893.909	-61.9464	442.11	908.171	-77.0516	348.731	880.841	-69.6344	768.791	852.711	486.324	484.622	868.327	499.384	487.471	888.33	416.58	400.107	924.396	435.356	304.54	884.832	413.497
590	5.89	694.312	1396.32	176.2	737.843	1377.03	100.218	733.338	1361.63	248.435	802.528	1170.52	7.97677	778.071	1190.88	328.838	702.645	1154.49	154.899	807.279	856.755	-161.977	521.744	882.624	-145.29	536.729	894.077	-61.9549	442.081	908.17	-77.0268	348.719	880.828	-69.623	768.81	852.685	486.295	484.553	868.299	499.386	487.436	888.352	416.601	400.007	924.464	435.34	304.486	884.855	413.505
591	5.9	694.511	1396.29	176.257	737.881	1377.04	100.31	733.342	1361.61	248.527	802.54	1170.52	8.00814	778.061	1190.84	328.857	702.659	1154.46	154.92	807.255	856.771	-161.982	521.788	882.607	-145.299	536.726	894.025	-61.9774	442.125	908.136	-77.0367	348.791	880.806	-69.6518	768.863	852.63	486.261	484.566	868.278	499.373	487.445	888.358	416.592	400	924.502	435.366	304.498	884.862	413.496
592	5.91	694.423	1396.33	176.382	737.966	1377.08	100.381	733.388	1361.58	248.647	802.553	1170.52	8.03971	778.094	1190.79	328.872	702.679	1154.44	154.95	807.284	856.794	-161.968	521.849	882.61	-145.299	536.65	893.849	-61.9692	442.178	908.114	-77.0661	348.836	880.807	-69.6615	768.893	852.57	486.247	484.546	868.246	499.377	487.491	888.345	416.596	400.015	924.473	435.397	304.531	884.867	413.496
593	5.92	694.087	1396.46	176.575	737.933	1377.13	100.475	733.396	1361.56	248.787	802.566	1170.53	8.08407	778.083	1190.77	328.918	702.711	1154.42	154.975	807.286	856.792	-161.967	521.862	882.622	-145.298	536.677	893.904	-61.9529	442.162	908.139	-77.0415	348.776	880.817	-69.6273	768.898	852.49	486.253	484.512	868.213	499.383	487.511	888.342	416.608	400.12	924.429	435.408	304.536	884.88	413.513
594	5.93	693.986	1396.56	176.72	737.935	1377.16	100.56	733.371	1361.52	248.905	802.575	1170.55	8.11061	778.067	1190.74	328.958	702.687	1154.42	154.999	807.281	856.802	-161.989	521.832	882.636	-145.295	536.811	894.085	-61.9703	442.13	908.141	-77.0367	348.72	880.824	-69.6096	768.902	852.389	486.224	484.582	868.228	499.378	487.551	888.35	416.618	400.15	924.474	435.39	304.567	884.877	413.526
595	5.94	694.03	1396.58	176.815	737.976	1377.19	100.632	733.421	1361.49	249	802.604	1170.54	8.12477	778.075	1190.7	328.96	702.689	1154.43	155.034	807.265	856.805	-162.008	521.856	882.65	-145.333	536.893	894.122	-62.0134	442.154	908.15	-77.0617	348.746	880.83	-69.6556	768.911	852.311	486.19	484.615	868.246	499.376	487.615	888.332	416.618	400.189	924.476	435.345	304.591	884.866	413.505
596	5.95	694.133	1396.51	176.853	737.965	1377.18	100.687	733.412	1361.46	249.104	802.626	1170.53	8.15579	778.074	1190.66	328.961	702.693	1154.41	155.044	807.235	856.799	-161.985	521.905	882.632	-145.366	536.911	894.109	-62.0227	442.19	908.132	-77.0903	348.776	880.81	-69.69	768.928	852.234	486.171	484.615	868.234	499.357	487.618	888.28	416.586	400.297	924.39	435.34	304.618	884.849	413.489
597	5.96	694.154	1396.46	176.915	737.942	1377.2	100.777	733.354	1361.42	249.219	802.605	1170.52	8.20362	778.075	1190.62	328.998	702.682	1154.39	155.077	807.259	856.822	-161.967	521.883	882.618	-145.349	536.876	894.111	-62.0113	442.183	908.096	-77.0876	348.781	880.795	-69.6813	768.926	852.186	486.178	484.57	868.189	499.344	487.791	887.979	416.835	400.317	924.336	435.385	304.634	884.838	413.502
598	5.97	694.263	1396.38	176.964	737.856	1377.2	100.906	733.349	1361.37	249.325	802.59	1170.54	8.2508	778.049	1190.59	329.04	702.664	1154.38	155.15	807.259	856.84	-161.957	521.815	882.623	-145.314	536.86	894.119	-61.9812	442.154	908.086	-77.0734	348.773	880.786	-69.6624	768.949	852.151	486.179	484.516	868.168	499.364	487.992	887.634	417.178	400.263	924.35	435.396	304.624	884.829	413.519
599	5.98	694.359	1396.29	177.005	737.795	1377.21	100.999	733.352	1361.34	249.402	802.589	1170.54	8.2805	778.052	1190.56	329.059	702.699	1154.33	155.182	807.27	856.861	-161.936	521.848	882.601	-145.303	536.846	894.107	-61.9656	442.155	908.069	-77.0601	348.744	880.78	-69.6344	768.94	852.098	486.149	484.544	868.145	499.349	487.699	888.1	416.765	400.217	924.35	435.373	304.614	884.823	413.518
600	5.99	694.348	1396.26	177.08	737.789	1377.21	101.05	733.341	1361.3	249.468	802.576	1170.55	8.29916	778.073	1190.53	329.06	702.739	1154.28	155.208	807.301	856.888	-161.908	521.873	882.574	-145.319	536.802	894.08	-61.9738	442.173	908.063	-77.0745	348.761	880.759	-69.6658	768.91	852.063	486.139	484.503	868.126	499.342	487.804	887.903	416.878	400.152	924.361	435.383	304.601	884.823	413.514
601	6	694.42	1396.22	177.139	737.686	1377.24	101.157	733.33	1361.27	249.531	802.568	1170.57	8.32565	778.056	1190.5	329.083	702.734	1154.25	155.234	807.29	856.892	-161.872	521.865	882.589	-145.309	536.769	894.067	-61.9775	442.144	908.068	-77.0709	348.761	880.775	-69.6733	768.906	852.042	486.149	484.468	868.129	499.36	487.976	887.584	417.142	400.058	924.441	435.391	304.559	884.849	413.51
602	6.01	694.482	1396.16	177.175	737.593	1377.27	101.26	733.344	1361.26	249.624	802.571	1170.58	8.36113	778.037	1190.5	329.121	702.731	1154.24	155.28	807.294	856.905	-161.842	521.845	882.629	-145.275	536.796	894.091	-61.968	442.118	908.078	-77.0556	348.758	880.799	-69.6329	768.953	852.032	486.151	484.459	868.15	499.369	487.818	887.82	416.996	400.013	924.493	435.392	304.545	884.872	413.515
603	6.02	694.672	1396.11	177.205	737.611	1377.3	101.31	733.292	1361.24	249.699	802.571	1170.6	8.39217	778.034	1190.49	329.143	702.749	1154.24	155.296	807.354	856.949	-161.829	521.843	882.659	-145.266	536.803	894.137	-61.9623	442.132	908.077	-77.0472	348.711	880.821	-69.6176	768.976	852.026	486.152	484.486	868.17	499.383	488.072	887.307	417.427	400.036	924.539	435.396	304.521	884.888	413.521
604	6.03	694.835	1396.04	177.213	737.66	1377.31	101.327	733.245	1361.21	249.755	802.583	1170.61	8.40996	778.035	1190.47	329.158	702.768	1154.23	155.299	807.381	856.97	-161.797	521.819	882.679	-145.276	536.767	894.163	-61.9538	442.15	908.088	-77.0604	348.689	880.835	-69.6318	768.986	852.007	486.156	484.491	868.158	499.377	488.015	887.47	417.298	399.991	924.555	435.392	304.543	884.886	413.528
605	6.04	694.803	1396.02	177.22	737.652	1377.35	101.379	733.247	1361.17	249.815	802.607	1170.61	8.43122	778.042	1190.45	329.17	702.78	1154.23	155.307	807.366	856.974	-161.767	521.815	882.69	-145.289	536.76	894.184	-61.9545	442.143	908.107	-77.079	348.726	880.825	-69.6569	768.99	851.965	486.166	484.514	868.133	499.383	487.657	888.057	416.781	400.033	924.503	435.38	304.592	884.877	413.526
606	6.05	694.782	1396	177.281	737.604	1377.37	101.422	733.248	1361.16	249.882	802.608	1170.6	8.47248	778.046	1190.44	329.182	702.831	1154.18	155.33	807.377	856.968	-161.729	521.822	882.691	-145.275	536.791	894.209	-61.9677	442.113	908.141	-77.0764	348.744	880.817	-69.6501	768.972	851.921	486.167	484.516	868.101	499.391	487.751	887.895	416.899	400.2	924.41	435.388	304.609	884.858	413.525
607	6.06	694.803	1395.99	177.331	737.578	1377.38	101.466	733.182	1361.16	249.926	802.623	1170.61	8.50195	778.063	1190.42	329.198	702.755	1154.19	155.362	807.375	856.971	-161.732	521.798	882.697	-145.254	536.833	894.219	-61.9658	442.098	908.163	-77.0642	348.684	880.859	-69.6435	768.952	851.885	486.163	484.55	868.092	499.387	487.972	887.556	417.192	400.315	924.358	435.421	304.643	884.849	413.52
608	6.07	694.799	1396.01	177.366	737.552	1377.38	101.501	733.162	1361.13	249.956	802.636	1170.61	8.51635	778.052	1190.39	329.214	702.699	1154.17	155.371	807.394	856.991	-161.723	521.804	882.713	-145.262	536.808	894.213	-61.9569	442.113	908.148	-77.0636	348.677	880.876	-69.6533	768.964	851.84	486.151	484.544	868.072	499.369	487.899	887.762	417.025	400.324	924.333	435.408	304.638	884.844	413.517
609	6.08	694.74	1396.01	177.417	737.522	1377.41	101.551	733.193	1361.11	250.003	802.665	1170.6	8.51967	778.049	1190.35	329.22	702.718	1154.15	155.374	807.429	856.99	-161.697	521.822	882.7	-145.266	536.684	894.134	-61.9193	442.109	908.126	-77.0484	348.686	880.867	-69.6628	768.979	851.813	486.15	484.482	868.052	499.38	488.282	887.228	417.49	400.292	924.336	435.446	304.636	884.835	413.521
610	6.09	694.788	1395.99	177.46	737.426	1377.41	101.625	733.171	1361.08	250.023	802.668	1170.59	8.54726	778.063	1190.32	329.241	702.748	1154.11	155.379	807.431	857.018	-161.693	521.867	882.661	-145.262	536.609	894.019	-61.8681	442.15	908.093	-77.0663	348.719	880.834	-69.6553	768.928	851.763	486.151	484.503	868.057	499.4	488.342	887.083	417.607	400.279	924.349	435.488	304.637	884.847	413.532
611	6.1	694.839	1395.94	177.474	737.436	1377.39	101.652	733.127	1361.05	250.019	802.652	1170.58	8.56046	778.035	1190.29	329.237	702.793	1154.07	155.386	807.412	857.053	-161.687	521.891	882.637	-145.279	536.677	894.035	-61.9005	442.216	908.036	-77.094	348.753	880.801	-69.6567	768.921	851.74	486.166	484.509	868.062	499.379	488.186	887.328	417.379	400.255	924.392	435.466	304.638	884.851	413.521
612	6.11	694.907	1395.88	177.459	737.45	1377.37	101.685	733.116	1361.02	250.031	802.649	1170.58	8.55804	778.011	1190.26	329.217	702.861	1154.03	155.374	807.429	857.076	-161.694	521.877	882.625	-145.298	536.551	893.883	-61.8958	442.212	908.003	-77.1379	348.758	880.774	-69.6679	768.932	851.742	486.163	484.492	868.048	499.367	487.945	887.697	417.053	400.103	924.434	435.427	304.605	884.847	413.513
613	6.12	694.854	1395.88	177.518	737.433	1377.34	101.699	733.133	1361.02	250.059	802.638	1170.6	8.57006	778.02	1190.27	329.221	702.877	1154.01	155.401	807.401	857.062	-161.72	521.886	882.616	-145.293	536.586	893.92	-61.9143	442.184	908.031	-77.1197	348.753	880.762	-69.6797	768.917	851.73	486.148	484.433	868.031	499.367	487.99	887.497	417.189	400.132	924.442	435.412	304.582	884.854	413.51
614	6.13	694.916	1395.86	177.564	737.5	1377.31	101.699	733.164	1361.04	250.11	802.656	1170.62	8.61199	778.006	1190.27	329.247	702.832	1154.01	155.45	807.348	857.045	-161.738	521.883	882.634	-145.27	536.801	894.093	-61.9567	442.135	908.065	-77.0677	348.746	880.761	-69.6656	768.905	851.696	486.16	484.439	868.024	499.379	487.817	887.744	417.019	400.087	924.484	435.463	304.585	884.867	413.519
615	6.14	695.046	1395.85	177.566	737.505	1377.33	101.705	733.151	1361.05	250.137	802.693	1170.63	8.63461	777.997	1190.27	329.257	702.855	1154.03	155.447	807.353	857.058	-161.747	521.871	882.65	-145.272	536.867	894.156	-61.985	442.154	908.051	-77.0802	348.742	880.78	-69.6699	768.893	851.674	486.152	484.44	868.032	499.389	487.953	887.523	417.219	400.111	924.476	435.435	304.583	884.867	413.516
616	6.15	695.094	1395.85	177.548	737.532	1377.35	101.703	733.206	1361.05	250.131	802.715	1170.63	8.6227	778.046	1190.27	329.243	702.876	1154.04	155.426	807.404	857.085	-161.739	521.897	882.657	-145.299	536.884	894.198	-61.9883	442.168	908.085	-77.1068	348.765	880.786	-69.6923	768.923	851.665	486.139	484.448	868.036	499.371	487.642	888.045	416.769	400.143	924.475	435.385	304.616	884.864	413.514
617	6.16	695.034	1395.89	177.57	737.525	1377.35	101.728	733.26	1361.05	250.129	802.732	1170.62	8.62684	778.099	1190.26	329.249	702.879	1154.03	155.463	807.453	857.102	-161.733	521.903	882.662	-145.285	536.867	894.223	-61.9745	442.191	908.095	-77.1093	348.734	880.807	-69.6673	768.969	851.658	486.153	484.51	868.028	499.356	487.651	888.159	416.68	400.15	924.479	435.412	304.67	884.871	413.525
618	6.17	695.011	1395.91	177.605	737.57	1377.38	101.715	733.234	1361.05	250.14	802.763	1170.62	8.6516	778.094	1190.26	329.263	702.866	1154.02	155.473	807.436	857.085	-161.714	521.896	882.666	-145.265	536.852	894.228	-61.9559	442.185	908.095	-77.0894	348.748	880.815	-69.6555	768.953	851.65	486.169	484.569	868.018	499.36	487.703	888.186	416.681	400.32	924.397	435.424	304.682	884.875	413.546
619	6.18	695.121	1395.89	177.578	737.59	1377.41	101.687	733.255	1361.04	250.137	802.775	1170.6	8.64727	778.109	1190.25	329.244	702.84	1154.04	155.443	807.425	857.089	-161.683	521.897	882.678	-145.286	536.809	894.213	-61.9485	442.156	908.11	-77.1126	348.762	880.831	-69.6759	768.961	851.653	486.162	484.609	868.019	499.371	487.721	888.172	416.652	400.413	924.357	435.396	304.707	884.858	413.542
620	6.19	695.094	1395.9	177.526	737.653	1377.44	101.653	733.291	1361.03	250.101	802.779	1170.58	8.60285	778.137	1190.22	329.209	702.849	1154.04	155.402	807.44	857.098	-161.689	521.904	882.666	-145.319	536.746	894.208	-61.9605	442.183	908.091	-77.1656	348.764	880.826	-69.7071	768.991	851.683	486.154	484.601	868.031	499.384	487.745	888.167	416.62	400.444	924.319	435.372	304.706	884.848	413.519
621	6.2	695.024	1395.92	177.54	737.715	1377.45	101.653	733.363	1361.02	250.06	802.788	1170.56	8.58483	778.147	1190.22	329.195	702.926	1154.02	155.364	807.448	857.09	-161.712	521.902	882.654	-145.324	536.638	894.121	-61.9271	442.208	908.027	-77.1728	348.785	880.804	-69.7052	768.965	851.689	486.149	484.606	868.031	499.367	487.857	887.873	416.866	400.379	924.311	435.406	304.697	884.834	413.514
622	6.21	695.145	1395.9	177.544	737.678	1377.44	101.67	733.348	1361.04	250.069	802.778	1170.56	8.60449	778.147	1190.25	329.194	702.956	1153.99	155.376	807.446	857.083	-161.705	521.862	882.667	-145.291	536.59	894.027	-61.9042	442.203	908.036	-77.1557	348.761	880.798	-69.685	768.921	851.704	486.156	484.573	868.02	499.37	488.224	887.235	417.422	400.225	924.389	435.462	304.665	884.832	413.541
623	6.22	695.286	1395.83	177.52	737.554	1377.41	101.729	733.33	1361.06	250.055	802.77	1170.57	8.62931	778.144	1190.27	329.199	702.954	1153.93	155.402	807.449	857.088	-161.67	521.844	882.662	-145.266	536.764	894.175	-61.9253	442.178	908.09	-77.1197	348.701	880.794	-69.644	768.883	851.757	486.179	484.489	868.038	499.403	488.319	887.032	417.615	400.078	924.479	435.439	304.597	884.843	413.571
[truncated: 3 more columns]

## Sheet: Trial01
PathFileType	4	(X/Y/Z)	Trial01.trc
DataRate	CameraRate	NumFrames	NumMarkers	Units	OrigDataRate	OrigDataStartFrame	OrigNumFrames
100	100	675	16	mm	100	1	675
Frame#	Time	nasion			r zyg pr			l zyg pr			r should			l should			sternum			r elbow			r ulna			r radius			r hand			r finger			l elbow			l ulna			l radius			l hand			l finger
		X1	Y1	Z1	X2	Y2	Z2	X3	Y3	Z3	X4	Y4	Z4	X5	Y5	Z5	X6	Y6	Z6	X7	Y7	Z7	X8	Y8	Z8	X9	Y9	Z9	X10	Y10	Z10	X11	Y11	Z11	X12	Y12	Z12	X13	Y13	Z13	X14	Y14	Z14	X15	Y15	Z15	X16	Y16	Z16
1	0	721.335	1397.69	191.533	754.394	1382.82	110.013	761.668	1352.74	256.007	807.752	1164.03	1.81375	781.865	1189.94	322.496	710.675	1155.09	149.705	790.788	882.651	-203.626	502.261	892.152	-221.038	515.163	899.15	-136.585	422.432	908.928	-145.385	333.979	880.543	-128.991	752.837	858.69	485.522	472.628	883.192	526.624	470.301	905.271	444.231	376.667	924.37	461.725	286.826	885.429	437.633
2	0.01	721.526	1397.76	191.497	754.426	1382.84	109.994	761.627	1352.73	255.99	807.726	1164.01	1.80706	781.815	1189.95	322.5	710.788	1155.03	149.705	790.705	882.657	-203.498	502.266	892.158	-221.055	515.176	899.12	-136.598	422.341	908.961	-145.36	333.984	880.521	-128.971	752.788	858.672	485.515	472.67	883.179	526.656	470.292	905.249	444.238	376.745	924.337	461.747	286.849	885.439	437.636
3	0.02	721.874	1397.7	191.459	754.407	1382.86	110.001	761.634	1352.72	255.98	807.694	1163.99	1.80165	781.822	1189.94	322.504	710.825	1154.99	149.717	790.531	882.7	-203.249	502.262	892.133	-221.068	515.394	898.985	-136.616	422.368	908.932	-145.365	333.994	880.484	-128.962	752.792	858.697	485.511	472.619	883.168	526.677	470.267	905.203	444.238	376.766	924.303	461.766	286.88	885.42	437.652
4	0.03	722.141	1397.63	191.386	754.428	1382.88	109.964	761.65	1352.73	255.959	807.662	1163.95	1.80157	781.826	1189.93	322.514	710.882	1154.92	149.709	790.491	882.717	-203.183	502.282	892.068	-221.094	515.538	898.881	-136.616	422.407	908.884	-145.363	333.992	880.45	-128.955	752.82	858.734	485.52	472.576	883.144	526.681	470.277	905.12	444.217	376.771	924.245	461.799	286.856	885.382	437.646
5	0.04	722.207	1397.64	191.312	754.45	1382.86	109.907	761.628	1352.76	255.917	807.638	1163.91	1.79477	781.804	1189.92	322.504	710.906	1154.88	149.713	790.453	882.69	-203.155	502.319	892.019	-221.105	515.515	898.849	-136.609	422.407	908.86	-145.372	333.985	880.429	-128.966	752.837	858.729	485.525	472.593	883.118	526.666	470.26	905.055	444.188	376.756	924.257	461.813	286.858	885.354	437.637
6	0.05	722.07	1397.69	191.269	754.427	1382.88	109.86	761.644	1352.8	255.879	807.621	1163.88	1.79463	781.791	1189.92	322.503	710.913	1154.88	149.7	790.447	882.697	-203.139	502.32	892.017	-221.119	515.456	898.898	-136.61	422.456	908.857	-145.411	334.004	880.415	-128.983	752.857	858.737	485.53	472.613	883.143	526.647	470.261	905.037	444.17	376.786	924.306	461.802	286.845	885.357	437.631
7	0.06	722.092	1397.71	191.197	754.476	1382.89	109.787	761.668	1352.87	255.841	807.608	1163.9	1.82462	781.787	1189.93	322.523	710.862	1154.93	149.703	790.483	882.708	-203.12	502.289	892.068	-221.105	515.384	898.982	-136.608	422.416	908.899	-145.381	334.01	880.453	-128.989	752.871	858.732	485.548	472.666	883.178	526.655	470.3	905.076	444.178	376.803	924.324	461.802	286.865	885.373	437.642
8	0.07	722.148	1397.73	191.133	754.506	1382.88	109.702	761.683	1352.94	255.812	807.596	1163.97	1.85908	781.779	1189.95	322.539	710.793	1155.01	149.721	790.488	882.706	-203.103	502.229	892.131	-221.065	515.242	899.092	-136.592	422.285	908.97	-145.317	334.007	880.49	-128.99	752.836	858.703	485.55	472.664	883.23	526.653	470.292	905.149	444.208	376.83	924.372	461.784	286.871	885.402	437.635
9	0.08	722.282	1397.7	191.023	754.527	1382.9	109.638	761.676	1352.97	255.769	807.587	1164.01	1.88654	781.789	1189.97	322.546	710.744	1155.05	149.741	790.488	882.726	-203.109	502.191	892.176	-221.046	515.172	899.137	-136.58	422.315	908.994	-145.323	333.969	880.521	-128.988	752.85	858.714	485.567	472.717	883.228	526.659	470.291	905.206	444.233	376.812	924.38	461.791	286.888	885.429	437.648
10	0.09	722.37	1397.67	190.93	754.54	1382.89	109.606	761.656	1352.99	255.76	807.593	1164.02	1.90052	781.764	1189.98	322.545	710.758	1155.04	149.753	790.438	882.731	-203.138	502.21	892.165	-221.035	515.338	899.042	-136.606	422.324	909.004	-145.308	333.968	880.514	-128.978	752.829	858.711	485.565	472.712	883.215	526.67	470.329	905.229	444.253	376.823	924.371	461.83	286.92	885.435	437.665
11	0.1	722.344	1397.65	190.928	754.609	1382.85	109.573	761.637	1353.02	255.762	807.59	1164	1.9107	781.745	1189.96	322.555	710.798	1154.99	149.771	790.408	882.751	-203.134	502.217	892.142	-221.013	515.542	898.904	-136.602	422.33	908.981	-145.284	333.991	880.48	-128.959	752.812	858.695	485.56	472.691	883.186	526.693	470.335	905.202	444.277	376.838	924.341	461.875	286.912	885.416	437.683
12	0.11	722.424	1397.59	190.878	754.595	1382.81	109.581	761.569	1353.03	255.724	807.564	1163.95	1.89202	781.719	1189.92	322.555	710.821	1154.92	149.77	790.432	882.769	-203.123	502.269	892.087	-221.045	515.588	898.841	-136.589	422.386	908.91	-145.321	334.021	880.435	-128.955	752.812	858.697	485.585	472.64	883.149	526.701	470.31	905.107	444.243	376.834	924.276	461.881	286.869	885.384	437.686
13	0.12	722.451	1397.53	190.766	754.559	1382.78	109.528	761.481	1353.02	255.684	807.554	1163.91	1.87406	781.675	1189.89	322.538	710.858	1154.84	149.73	790.477	882.802	-203.141	502.316	892.032	-221.095	515.585	898.824	-136.6	422.466	908.844	-145.396	334.024	880.402	-128.97	752.822	858.698	485.591	472.59	883.137	526.684	470.308	905.059	444.21	376.769	924.242	461.877	286.823	885.36	437.67
14	0.13	722.328	1397.52	190.722	754.567	1382.76	109.458	761.413	1353.04	255.656	807.515	1163.91	1.8788	781.645	1189.88	322.529	710.789	1154.84	149.718	790.469	882.803	-203.166	502.322	892.013	-221.115	515.491	898.868	-136.62	422.404	908.847	-145.407	333.966	880.402	-128.992	752.802	858.68	485.586	472.545	883.131	526.679	470.301	905.053	444.192	376.732	924.273	461.857	286.803	885.357	437.649
15	0.14	722.24	1397.55	190.718	754.594	1382.76	109.451	761.388	1353.08	255.652	807.474	1163.95	1.90444	781.621	1189.89	322.545	710.668	1154.86	149.755	790.475	882.795	-203.159	502.284	892.037	-221.08	515.358	898.938	-136.599	422.33	908.881	-145.35	333.96	880.418	-128.98	752.796	858.665	485.601	472.578	883.146	526.703	470.277	905.095	444.225	376.75	924.329	461.834	286.807	885.385	437.662
16	0.15	722.148	1397.6	190.763	754.599	1382.8	109.451	761.343	1353.11	255.659	807.457	1163.98	1.92572	781.618	1189.89	322.564	710.661	1154.89	149.756	790.503	882.806	-203.136	502.253	892.084	-221.044	515.218	899.014	-136.56	422.407	908.903	-145.345	333.988	880.449	-128.984	752.814	858.65	485.602	472.6	883.154	526.708	470.272	905.135	444.241	376.789	924.353	461.83	286.821	885.409	437.675
17	0.16	722.084	1397.61	190.747	754.6	1382.81	109.43	761.361	1353.11	255.651	807.444	1163.98	1.93853	781.632	1189.89	322.562	710.649	1154.92	149.743	790.495	882.774	-203.154	502.237	892.111	-221.035	515.131	899.058	-136.545	422.396	908.926	-145.349	333.976	880.445	-129.006	752.805	858.616	485.587	472.606	883.161	526.673	470.299	905.174	444.24	376.815	924.339	461.819	286.827	885.402	437.664
18	0.17	722.284	1397.52	190.645	754.584	1382.8	109.397	761.336	1353.1	255.629	807.401	1163.97	1.95007	781.65	1189.88	322.556	710.667	1154.91	149.736	790.442	882.759	-203.152	502.242	892.104	-221.036	515.305	898.966	-136.577	422.35	908.922	-145.32	333.976	880.438	-129.009	752.804	858.598	485.586	472.584	883.148	526.667	470.31	905.173	444.24	376.86	924.283	461.819	286.852	885.399	437.654
19	0.18	722.351	1397.47	190.628	754.548	1382.8	109.412	761.315	1353.12	255.624	807.407	1163.94	1.92876	781.64	1189.87	322.563	710.763	1154.86	149.761	790.463	882.796	-203.154	502.276	892.071	-221.057	515.555	898.843	-136.622	422.378	908.914	-145.334	334.017	880.421	-129.009	752.776	858.572	485.603	472.618	883.119	526.681	470.305	905.111	444.235	376.829	924.269	461.822	286.892	885.382	437.663
20	0.19	722.413	1397.42	190.572	754.49	1382.79	109.422	761.322	1353.15	255.624	807.429	1163.94	1.92296	781.655	1189.88	322.578	710.749	1154.86	149.762	790.489	882.794	-203.143	502.301	892.06	-221.073	515.58	898.811	-136.648	422.407	908.891	-145.345	334.03	880.407	-129	752.824	858.576	485.621	472.606	883.104	526.668	470.31	905.077	444.216	376.801	924.278	461.823	286.897	885.375	437.664
21	0.2	722.336	1397.43	190.553	754.542	1382.8	109.379	761.283	1353.19	255.608	807.357	1163.97	1.96126	781.625	1189.89	322.589	710.647	1154.92	149.778	790.487	882.794	-203.154	502.257	892.085	-221.058	515.514	898.854	-136.65	422.327	908.904	-145.294	333.99	880.418	-128.985	752.845	858.598	485.608	472.568	883.133	526.667	470.309	905.097	444.23	376.798	924.273	461.788	286.873	885.39	437.665
22	0.21	722.357	1397.44	190.522	754.554	1382.82	109.312	761.267	1353.22	255.577	807.29	1163.97	1.99	781.567	1189.89	322.587	710.581	1154.93	149.796	790.464	882.804	-203.176	502.21	892.121	-221.05	515.44	898.897	-136.624	422.278	908.921	-145.269	333.966	880.433	-128.976	752.807	858.582	485.597	472.607	883.154	526.676	470.311	905.127	444.25	376.764	924.292	461.793	286.861	885.396	437.673
23	0.22	722.4	1397.45	190.47	754.47	1382.84	109.317	761.278	1353.28	255.568	807.284	1163.96	1.98664	781.554	1189.88	322.583	710.626	1154.9	149.785	790.457	882.838	-203.185	502.242	892.122	-221.071	515.428	898.925	-136.607	422.363	908.9	-145.346	333.947	880.46	-128.986	752.781	858.595	485.584	472.661	883.155	526.694	470.297	905.102	444.225	376.76	924.312	461.829	286.865	885.404	437.66
24	0.23	722.42	1397.47	190.372	754.387	1382.85	109.307	761.26	1353.33	255.529	807.274	1163.96	1.9774	781.572	1189.88	322.573	710.7	1154.88	149.764	790.494	882.861	-203.17	502.277	892.103	-221.097	515.3	898.978	-136.575	422.409	908.869	-145.389	333.954	880.454	-128.997	752.806	858.616	485.59	472.623	883.147	526.688	470.304	905.096	444.212	376.763	924.342	461.834	286.837	885.392	437.651
25	0.24	722.424	1397.49	190.304	754.397	1382.84	109.249	761.222	1353.37	255.497	807.273	1163.94	1.98428	781.564	1189.88	322.58	710.708	1154.88	149.77	790.507	882.867	-203.144	502.253	892.093	-221.087	515.239	898.996	-136.558	422.345	908.86	-145.353	333.961	880.449	-129.01	752.804	858.607	485.598	472.632	883.154	526.698	470.29	905.096	444.217	376.781	924.336	461.839	286.802	885.372	437.645
26	0.25	722.292	1397.51	190.27	754.43	1382.82	109.183	761.212	1353.41	255.471	807.292	1163.94	2.00284	781.552	1189.88	322.588	710.764	1154.85	149.775	790.491	882.85	-203.138	502.254	892.083	-221.07	515.36	898.936	-136.563	422.347	908.873	-145.339	333.944	880.446	-129.004	752.804	858.588	485.601	472.643	883.14	526.72	470.297	905.075	444.221	376.862	924.289	461.85	286.819	885.37	437.664
27	0.26	722.34	1397.47	190.216	754.407	1382.8	109.14	761.209	1353.45	255.428	807.322	1163.96	2.01968	781.549	1189.88	322.601	710.801	1154.83	149.799	790.524	882.843	-203.139	502.256	892.083	-221.045	515.57	898.81	-136.592	422.354	908.883	-145.302	333.949	880.429	-128.995	752.82	858.578	485.579	472.626	883.101	526.719	470.324	905.067	444.223	376.831	924.264	461.874	286.875	885.383	437.69
28	0.27	722.313	1397.46	190.125	754.425	1382.77	109.073	761.171	1353.51	255.364	807.321	1163.98	2.04024	781.524	1189.87	322.617	710.721	1154.87	149.84	790.52	882.834	-203.137	502.212	892.103	-220.999	515.61	898.752	-136.602	422.299	908.899	-145.264	333.953	880.429	-128.978	752.83	858.56	485.559	472.612	883.058	526.709	470.328	905.107	444.246	376.803	924.234	461.892	286.865	885.392	437.698
29	0.28	722.113	1397.53	190.038	754.458	1382.76	108.966	761.119	1353.56	255.274	807.284	1164.01	2.06028	781.48	1189.87	322.632	710.61	1154.91	149.82	790.488	882.832	-203.134	502.167	892.139	-220.967	515.543	898.773	-136.604	422.262	908.943	-145.254	333.933	880.428	-128.965	752.821	858.53	485.573	472.575	883.081	526.696	470.297	905.138	444.26	376.819	924.244	461.865	286.854	885.408	437.693
30	0.29	721.917	1397.61	189.969	754.526	1382.79	108.825	761.09	1353.62	255.181	807.294	1164.03	2.04416	781.495	1189.88	322.624	710.583	1154.94	149.806	790.478	882.825	-203.127	502.185	892.141	-221	515.378	898.874	-136.577	422.247	908.96	-145.269	333.903	880.462	-129.004	752.809	858.523	485.578	472.599	883.097	526.678	470.283	905.148	444.25	376.807	924.282	461.832	286.867	885.418	437.683
31	0.3	721.746	1397.71	189.881	754.569	1382.79	108.754	761.106	1353.68	255.1	807.285	1163.99	2.00852	781.513	1189.87	322.606	710.612	1154.93	149.795	790.505	882.817	-203.133	502.205	892.125	-221.034	515.312	898.948	-136.557	422.314	908.957	-145.309	333.934	880.473	-129.038	752.823	858.541	485.573	472.64	883.111	526.667	470.287	905.128	444.236	376.806	924.325	461.823	286.847	885.411	437.66
32	0.31	721.514	1397.83	189.807	754.632	1382.81	108.66	761.094	1353.74	255.025	807.274	1163.96	1.994	781.489	1189.86	322.595	710.649	1154.89	149.776	790.542	882.819	-203.139	502.23	892.1	-221.068	515.275	899.012	-136.56	422.295	908.935	-145.316	333.933	880.466	-129.026	752.829	858.547	485.582	472.692	883.132	526.677	470.273	905.108	444.217	376.791	924.359	461.82	286.828	885.389	437.641
33	0.32	721.307	1397.93	189.743	754.73	1382.8	108.565	761.107	1353.7	254.895	807.26	1163.94	1.99478	781.477	1189.85	322.596	710.694	1154.85	149.77	790.501	882.808	-203.121	502.302	892.077	-221.097	515.297	899.02	-136.569	422.376	908.892	-145.369	333.971	880.446	-129.018	752.834	858.547	485.598	472.676	883.152	526.684	470.307	905.094	444.204	376.841	924.376	461.848	286.837	885.373	437.654
34	0.33	721.299	1397.93	189.664	754.835	1382.77	108.508	761.164	1353.54	254.675	807.259	1163.92	2.00687	781.494	1189.85	322.596	710.726	1154.8	149.77	790.474	882.816	-203.109	502.33	892.049	-221.092	515.398	898.926	-136.567	422.41	908.867	-145.347	333.998	880.436	-129.006	752.839	858.549	485.604	472.659	883.144	526.714	470.297	905.063	444.209	376.865	924.305	461.842	286.88	885.366	437.678
35	0.34	721.515	1397.85	189.553	754.932	1382.72	108.455	761.224	1353.56	254.568	807.265	1163.92	2.03613	781.499	1189.85	322.606	710.714	1154.8	149.803	790.488	882.804	-203.116	502.279	892.052	-221.044	515.554	898.803	-136.573	422.38	908.861	-145.291	333.988	880.423	-128.988	752.831	858.542	485.596	472.69	883.107	526.717	470.256	905.065	444.228	376.823	924.302	461.831	286.886	885.375	437.691
36	0.35	721.604	1397.86	189.453	754.99	1382.71	108.375	761.244	1353.65	254.484	807.248	1163.93	2.04976	781.477	1189.84	322.614	710.661	1154.83	149.832	790.483	882.806	-203.138	502.238	892.072	-221.014	515.614	898.757	-136.57	422.34	908.859	-145.256	333.962	880.424	-128.992	752.799	858.543	485.61	472.639	883.082	526.726	470.244	905.095	444.265	376.814	924.292	461.863	286.876	885.375	437.702
37	0.36	721.43	1397.98	189.378	754.988	1382.73	108.314	761.243	1353.73	254.375	807.236	1163.94	2.04758	781.474	1189.84	322.592	710.62	1154.83	149.819	790.475	882.784	-203.123	502.241	892.075	-221.015	515.536	898.802	-136.569	422.388	908.872	-145.302	333.954	880.427	-128.991	752.77	858.537	485.627	472.568	883.092	526.724	470.249	905.114	444.288	376.783	924.279	461.871	286.883	885.376	437.705
38	0.37	721.31	1398.12	189.25	755.101	1382.76	108.194	761.283	1353.83	254.231	807.226	1163.94	2.01395	781.473	1189.84	322.567	710.612	1154.83	149.781	790.492	882.792	-203.125	502.245	892.074	-221.03	515.431	898.865	-136.574	422.398	908.891	-145.327	333.97	880.42	-128.994	752.772	858.534	485.631	472.588	883.118	526.697	470.249	905.094	444.262	376.776	924.303	461.861	286.873	885.38	437.694
39	0.38	721.391	1398.27	189.08	755.187	1382.79	108.116	761.393	1353.95	254.107	807.211	1163.93	1.99987	781.462	1189.84	322.554	710.612	1154.83	149.729	790.502	882.799	-203.143	502.243	892.087	-221.051	515.403	898.898	-136.577	422.338	908.919	-145.319	333.993	880.427	-129.004	752.82	858.558	485.626	472.579	883.144	526.681	470.247	905.068	444.223	376.818	924.323	461.84	286.875	885.386	437.68
40	0.39	721.577	1398.4	188.951	755.256	1382.82	108.066	761.488	1354.09	253.995	807.205	1163.94	1.9889	781.481	1189.87	322.549	710.578	1154.85	149.727	790.493	882.789	-203.143	502.259	892.089	-221.061	515.358	898.944	-136.571	422.381	908.915	-145.338	333.988	880.449	-129.01	752.86	858.571	485.62	472.595	883.152	526.678	470.264	905.071	444.209	376.841	924.335	461.835	286.868	885.394	437.667
41	0.4	721.763	1398.52	188.772	755.351	1382.85	108.011	761.551	1354.25	253.932	807.229	1163.96	1.9943	781.484	1189.88	322.553	710.532	1154.86	149.733	790.468	882.78	-203.128	502.265	892.096	-221.031	515.309	898.956	-136.551	422.416	908.898	-145.349	333.987	880.443	-129.022	752.846	858.597	485.621	472.6	883.17	526.706	470.286	905.097	444.22	376.848	924.321	461.822	286.866	885.404	437.681
42	0.41	722.076	1398.62	188.614	755.436	1382.87	107.964	761.644	1354.44	253.874	807.194	1163.97	2.00434	781.45	1189.88	322.547	710.541	1154.86	149.73	790.475	882.811	-203.118	502.245	892.095	-221.009	515.434	898.895	-136.566	422.385	908.911	-145.319	333.945	880.448	-129.01	752.821	858.618	485.609	472.611	883.181	526.699	470.279	905.13	444.255	376.813	924.314	461.82	286.848	885.415	437.695
43	0.42	722.396	1398.73	188.456	755.584	1382.87	107.881	761.766	1354.6	253.815	807.174	1163.97	1.99469	781.442	1189.89	322.531	710.597	1154.85	149.74	790.475	882.792	-203.116	502.265	892.074	-221.013	515.583	898.814	-136.591	422.367	908.9	-145.283	333.939	880.447	-128.996	752.807	858.637	485.578	472.598	883.185	526.688	470.264	905.123	444.245	376.799	924.318	461.832	286.843	885.411	437.683
44	0.43	722.615	1398.9	188.295	755.826	1382.9	107.723	761.902	1354.72	253.715	807.186	1163.96	1.98851	781.43	1189.9	322.519	710.652	1154.84	149.721	790.465	882.758	-203.1	502.279	892.051	-221.034	515.631	898.782	-136.591	422.41	908.879	-145.304	333.972	880.43	-129.007	752.803	858.637	485.558	472.59	883.173	526.681	470.257	905.076	444.215	376.818	924.303	461.832	286.852	885.399	437.676
45	0.44	722.718	1399.13	188.161	756.03	1382.94	107.569	762.056	1354.84	253.606	807.19	1163.94	1.96531	781.42	1189.9	322.498	710.587	1154.85	149.688	790.417	882.724	-203.093	502.27	892.047	-221.042	515.502	898.836	-136.584	422.376	908.867	-145.319	333.981	880.419	-129.023	752.79	858.624	485.546	472.57	883.17	526.678	470.269	905.058	444.205	376.812	924.292	461.814	286.834	885.379	437.667
46	0.45	722.917	1399.31	188.007	756.229	1382.98	107.437	762.231	1354.94	253.525	807.182	1163.92	1.95235	781.428	1189.91	322.489	710.518	1154.86	149.667	790.451	882.695	-203.093	502.259	892.056	-221.04	515.461	898.846	-136.586	422.33	908.877	-145.311	333.997	880.412	-129.024	752.784	858.619	485.516	472.595	883.159	526.674	470.255	905.079	444.211	376.859	924.278	461.813	286.82	885.373	437.659
47	0.46	723.153	1399.49	187.861	756.442	1383.02	107.311	762.396	1355.02	253.457	807.204	1163.93	1.93058	781.449	1189.93	322.458	710.544	1154.9	149.668	790.485	882.686	-203.113	502.242	892.068	-221.036	515.413	898.883	-136.562	422.325	908.905	-145.283	333.963	880.431	-129.008	752.842	858.661	485.496	472.648	883.135	526.67	470.257	905.093	444.229	376.841	924.29	461.829	286.848	885.379	437.657
48	0.47	723.474	1399.65	187.756	756.655	1383.05	107.177	762.544	1355.1	253.411	807.235	1163.94	1.91396	781.446	1189.95	322.446	710.575	1154.95	149.671	790.481	882.68	-203.116	502.244	892.076	-221.038	515.413	898.898	-136.568	422.334	908.901	-145.29	333.929	880.462	-129.002	752.884	858.686	485.493	472.701	883.121	526.67	470.287	905.099	444.233	376.822	924.303	461.832	286.882	885.384	437.664
49	0.48	723.767	1399.77	187.651	756.862	1383.1	107.054	762.626	1355.15	253.357	807.27	1163.93	1.90236	781.424	1189.96	322.435	710.525	1154.98	149.665	790.435	882.629	-203.117	502.232	892.08	-221.026	515.376	898.895	-136.561	422.275	908.899	-145.259	333.929	880.462	-128.984	752.884	858.712	485.493	472.643	883.134	526.685	470.292	905.102	444.241	376.82	924.334	461.85	286.876	885.389	437.685
50	0.49	724.007	1399.84	187.513	757.111	1383.1	106.942	762.68	1355.19	253.294	807.294	1163.9	1.87936	781.425	1189.97	322.427	710.545	1154.97	149.668	790.427	882.607	-203.133	502.22	892.072	-221.006	515.425	898.864	-136.556	422.257	908.899	-145.239	333.941	880.439	-128.963	752.888	858.753	485.468	472.655	883.138	526.695	470.283	905.078	444.229	376.816	924.302	461.861	286.874	885.388	437.691
51	0.5	724.429	1399.84	187.322	757.375	1383.1	106.804	762.732	1355.22	253.21	807.295	1163.87	1.84008	781.446	1189.98	322.393	710.62	1154.96	149.67	790.403	882.599	-203.137	502.236	892.037	-221.024	515.605	898.779	-136.583	422.379	908.877	-145.297	333.96	880.42	-128.977	752.905	858.786	485.452	472.669	883.125	526.682	470.288	905.068	444.211	376.797	924.275	461.849	286.875	885.37	437.679
52	0.51	724.731	1399.91	187.124	757.622	1383.11	106.655	762.798	1355.28	253.146	807.319	1163.85	1.80199	781.442	1189.99	322.365	710.639	1154.95	149.64	790.448	882.616	-203.157	502.247	892.02	-221.042	515.599	898.794	-136.595	422.373	908.876	-145.304	333.962	880.419	-128.982	752.897	858.825	485.457	472.692	883.143	526.679	470.303	905.059	444.191	376.762	924.296	461.844	286.869	885.353	437.657
53	0.52	724.866	1400.06	186.96	757.815	1383.13	106.539	762.827	1355.37	253.092	807.302	1163.85	1.7935	781.455	1190.01	322.35	710.643	1154.97	149.593	790.441	882.623	-203.154	502.241	892.051	-221.064	515.479	898.851	-136.59	422.307	908.895	-145.282	333.932	880.445	-128.991	752.894	858.873	485.491	472.632	883.165	526.67	470.261	905.08	444.18	376.791	924.309	461.804	286.83	885.366	437.647
54	0.53	725.072	1400.21	186.828	757.989	1383.17	106.455	762.882	1355.44	253.045	807.305	1163.86	1.80115	781.499	1190.02	322.334	710.591	1155.03	149.574	790.448	882.619	-203.161	502.232	892.093	-221.067	515.402	898.92	-136.597	422.297	908.93	-145.273	333.923	880.456	-129.008	752.9	858.89	485.5	472.611	883.208	526.672	470.256	905.122	444.2	376.821	924.32	461.806	286.828	885.384	437.651
55	0.54	725.277	1400.33	186.727	758.15	1383.23	106.376	762.962	1355.49	252.986	807.357	1163.89	1.79732	781.534	1190.04	322.325	710.59	1155.09	149.571	790.421	882.607	-203.179	502.214	892.111	-221.048	515.343	898.964	-136.587	422.329	908.926	-145.274	333.937	880.465	-128.999	752.925	858.92	485.471	472.62	883.236	526.669	470.267	905.148	444.21	376.837	924.371	461.813	286.851	885.399	437.646
56	0.55	725.598	1400.43	186.615	758.368	1383.23	106.292	763.057	1355.55	252.939	807.412	1163.89	1.77924	781.563	1190.04	322.322	710.604	1155.13	149.547	790.413	882.6	-203.22	502.218	892.126	-221.052	515.284	899.009	-136.577	422.337	908.955	-145.288	333.967	880.473	-128.988	752.91	858.924	485.439	472.653	883.238	526.662	470.287	905.136	444.197	376.83	924.382	461.796	286.852	885.409	437.647
57	0.56	725.969	1400.45	186.508	758.51	1383.23	106.276	763.362	1355.72	252.948	807.42	1163.87	1.76448	781.613	1190.04	322.319	710.607	1155.15	149.548	790.431	882.632	-203.227	502.251	892.118	-221.061	515.272	899.015	-136.58	422.326	908.942	-145.255	333.974	880.469	-128.981	752.876	858.894	485.449	472.673	883.248	526.67	470.311	905.125	444.205	376.826	924.369	461.811	286.867	885.402	437.662
58	0.57	726.329	1400.43	186.45	758.688	1383.23	106.254	763.96	1356.06	253.006	807.465	1163.87	1.76268	781.678	1190.02	322.334	710.746	1155.11	149.569	790.478	882.653	-203.203	502.285	892.089	-221.07	515.431	898.938	-136.591	422.365	908.893	-145.256	333.992	880.459	-128.974	752.854	858.884	485.46	472.707	883.232	526.692	470.292	905.12	444.202	376.844	924.324	461.838	286.866	885.394	437.681
59	0.58	726.497	1400.43	186.42	758.866	1383.21	106.226	764.197	1356.17	253	807.55	1163.89	1.76119	781.724	1190.02	322.324	710.807	1155.08	149.583	790.474	882.676	-203.212	502.285	892.076	-221.066	515.533	898.862	-136.586	422.389	908.855	-145.263	334.001	880.441	-128.977	752.867	858.882	485.445	472.703	883.218	526.695	470.285	905.122	444.189	376.877	924.284	461.847	286.853	885.375	437.686
60	0.59	726.582	1400.45	186.371	759.043	1383.2	106.15	764.33	1356.19	252.964	807.582	1163.89	1.77113	781.757	1190.02	322.321	710.786	1155.1	149.59	790.488	882.73	-203.239	502.234	892.084	-221.054	515.487	898.859	-136.598	422.334	908.863	-145.23	333.978	880.43	-128.984	752.895	858.896	485.428	472.659	883.197	526.677	470.287	905.117	444.179	376.792	924.293	461.833	286.834	885.379	437.671
61	0.6	726.622	1400.5	186.349	759.19	1383.22	106.087	764.403	1356.2	252.933	807.586	1163.89	1.77106	781.757	1190.01	322.315	710.779	1155.13	149.581	790.501	882.748	-203.246	502.187	892.101	-221.042	515.358	898.918	-136.601	422.296	908.874	-145.238	333.971	880.427	-128.986	752.898	858.891	485.413	472.585	883.203	526.659	470.269	905.115	444.177	376.736	924.319	461.8	286.798	885.386	437.651
62	0.61	726.772	1400.53	186.337	759.333	1383.22	106.063	764.473	1356.21	252.921	807.644	1163.9	1.75623	781.775	1189.99	322.313	710.853	1155.12	149.566	790.495	882.755	-203.252	502.198	892.095	-221.057	515.309	898.951	-136.594	422.274	908.866	-145.238	333.981	880.43	-128.989	752.91	858.877	485.398	472.559	883.22	526.659	470.237	905.102	444.175	376.734	924.334	461.783	286.777	885.378	437.645
63	0.62	726.906	1400.54	186.352	759.451	1383.24	106.089	764.612	1356.23	252.922	807.714	1163.9	1.74536	781.819	1189.98	322.3	710.931	1155.12	149.554	790.524	882.786	-203.254	502.193	892.105	-221.066	515.315	898.961	-136.584	422.309	908.859	-145.269	333.965	880.432	-128.997	752.915	858.85	485.35	472.593	883.227	526.659	470.229	905.099	444.147	376.824	924.29	461.785	286.787	885.373	437.637
64	0.63	727.041	1400.58	186.367	759.557	1383.27	106.083	764.73	1356.23	252.94	807.766	1163.9	1.73045	781.871	1189.98	322.308	710.98	1155.13	149.564	790.526	882.816	-203.279	502.216	892.113	-221.064	515.268	898.993	-136.581	422.331	908.876	-145.253	333.963	880.456	-128.994	752.955	858.827	485.299	472.613	883.23	526.653	470.242	905.112	444.147	376.815	924.307	461.791	286.827	885.377	437.635
65	0.64	727.119	1400.63	186.413	759.66	1383.28	106.106	764.829	1356.24	252.969	807.8	1163.91	1.74745	781.898	1189.97	322.332	711.034	1155.14	149.619	790.514	882.828	-203.301	502.216	892.117	-221.037	515.299	898.987	-136.569	422.309	908.864	-145.231	333.965	880.466	-128.969	752.965	858.793	485.283	472.656	883.213	526.665	470.256	905.095	444.158	376.834	924.331	461.838	286.874	885.385	437.659
66	0.65	727.3	1400.65	186.424	759.773	1383.28	106.097	764.944	1356.25	252.999	807.841	1163.93	1.78223	781.946	1189.96	322.36	711.043	1155.16	149.646	790.516	882.816	-203.291	502.228	892.136	-221.023	515.373	898.967	-136.566	422.367	908.875	-145.234	333.977	880.47	-128.956	752.974	858.758	485.274	472.732	883.191	526.67	470.277	905.082	444.167	376.899	924.324	461.853	286.905	885.381	437.687
67	0.66	727.587	1400.62	186.415	759.937	1383.29	106.056	765.053	1356.24	253	807.857	1163.93	1.7818	782.01	1189.95	322.371	711.035	1155.17	149.644	790.526	882.815	-203.293	502.243	892.136	-221.046	515.397	898.963	-136.574	422.367	908.881	-145.233	333.97	880.469	-128.979	753.019	858.752	485.259	472.753	883.168	526.665	470.313	905.106	444.178	376.924	924.305	461.837	286.929	885.39	437.676
68	0.67	727.638	1400.65	186.406	759.973	1383.33	106.06	765.112	1356.25	252.992	807.858	1163.95	1.7743	782.017	1189.95	322.371	711.027	1155.21	149.631	790.521	882.841	-203.304	502.226	892.133	-221.07	515.446	898.94	-136.605	422.387	908.878	-145.252	333.983	880.475	-128.991	753.049	858.749	485.244	472.756	883.157	526.641	470.311	905.11	444.16	376.901	924.302	461.82	286.922	885.402	437.652
69	0.68	727.479	1400.74	186.42	760.076	1383.37	106.036	765.149	1356.27	252.982	807.864	1163.96	1.77797	782.022	1189.96	322.372	711.064	1155.24	149.62	790.504	882.851	-203.315	502.227	892.16	-221.073	515.451	898.947	-136.618	422.336	908.892	-145.256	334.002	880.468	-128.995	753.044	858.75	485.263	472.728	883.178	526.633	470.313	905.12	444.166	376.904	924.31	461.802	286.925	885.408	437.658
70	0.69	727.487	1400.78	186.41	760.142	1383.37	106.022	765.165	1356.28	252.984	807.816	1163.96	1.78056	782.027	1189.96	322.389	711.114	1155.23	149.639	790.486	882.87	-203.316	502.219	892.167	-221.062	515.354	898.996	-136.592	422.262	908.896	-145.247	333.983	880.49	-128.98	753.004	858.744	485.286	472.719	883.208	526.647	470.326	905.132	444.166	376.865	924.334	461.798	286.902	885.402	437.663
71	0.7	727.561	1400.8	186.411	760.202	1383.34	106.004	765.17	1356.3	252.976	807.796	1163.96	1.79536	782.012	1189.96	322.406	711.123	1155.22	149.665	790.498	882.903	-203.334	502.219	892.159	-221.065	515.319	899.01	-136.586	422.297	908.883	-145.259	334.004	880.48	-128.975	752.965	858.741	485.293	472.74	883.205	526.649	470.324	905.118	444.151	376.851	924.354	461.797	286.882	885.404	437.658
72	0.71	727.647	1400.76	186.391	760.219	1383.32	106.007	765.196	1356.31	252.966	807.783	1163.96	1.81522	782.003	1189.96	322.42	711.126	1155.2	149.664	790.506	882.916	-203.345	502.245	892.128	-221.084	515.347	898.991	-136.595	422.299	908.894	-145.255	333.991	880.471	-128.986	752.99	858.752	485.303	472.745	883.183	526.644	470.322	905.093	444.149	376.835	924.352	461.789	286.886	885.402	437.652
73	0.72	727.715	1400.69	186.377	760.165	1383.29	106.013	765.189	1356.31	252.977	807.743	1163.96	1.8535	781.993	1189.96	322.452	711.159	1155.17	149.709	790.478	882.928	-203.325	502.24	892.116	-221.07	515.454	898.915	-136.596	422.291	908.861	-145.25	333.978	880.468	-128.972	752.983	858.764	485.323	472.688	883.165	526.652	470.33	905.099	444.183	376.817	924.302	461.791	286.86	885.39	437.663
74	0.73	727.735	1400.67	186.393	760.114	1383.29	106.032	765.227	1356.33	252.98	807.711	1163.96	1.90497	781.998	1189.97	322.497	711.147	1155.18	149.776	790.454	882.954	-203.296	502.191	892.134	-221.028	515.474	898.877	-136.561	422.316	908.858	-145.219	333.975	880.475	-128.94	752.947	858.743	485.353	472.663	883.167	526.681	470.307	905.088	444.214	376.815	924.307	461.809	286.859	885.394	437.685
75	0.74	727.708	1400.65	186.39	760.092	1383.29	106.01	765.232	1356.37	252.968	807.681	1163.97	1.93247	781.992	1189.96	322.526	711.122	1155.19	149.792	790.458	882.975	-203.273	502.188	892.139	-221.012	515.484	898.852	-136.558	422.257	908.86	-145.173	333.966	880.452	-128.941	752.93	858.728	485.39	472.632	883.182	526.681	470.277	905.077	444.222	376.83	924.318	461.841	286.882	885.371	437.69
76	0.75	727.614	1400.71	186.351	760.028	1383.25	105.982	765.2	1356.39	252.938	807.627	1163.98	1.94103	781.959	1189.95	322.536	711.069	1155.21	149.793	790.455	882.983	-203.274	502.212	892.132	-221.038	515.459	898.86	-136.59	422.281	908.868	-145.208	333.954	880.436	-128.957	752.911	858.718	485.401	472.674	883.182	526.679	470.244	905.087	444.211	376.803	924.316	461.832	286.904	885.361	437.674
77	0.76	727.497	1400.73	186.268	760.051	1383.24	105.91	765.146	1356.41	252.904	807.583	1164	1.95574	781.937	1189.97	322.546	711.007	1155.26	149.788	790.488	883.016	-203.273	502.209	892.152	-221.051	515.41	898.928	-136.605	422.237	908.884	-145.202	333.97	880.438	-128.965	752.9	858.716	485.428	472.672	883.16	526.674	470.26	905.096	444.183	376.787	924.319	461.784	286.872	885.372	437.646
78	0.77	727.347	1400.77	186.168	760.087	1383.23	105.822	765.077	1356.45	252.882	807.531	1164.03	1.98195	781.925	1189.98	322.563	711.026	1155.27	149.779	790.559	883.007	-203.379	502.231	892.164	-221.052	515.318	898.984	-136.603	422.232	908.875	-145.22	333.972	880.446	-128.963	752.872	858.699	485.46	472.639	883.178	526.671	470.26	905.124	444.193	376.817	924.31	461.792	286.85	885.386	437.644
79	0.78	727.075	1400.87	186.124	760.012	1383.22	105.808	765.049	1356.51	252.855	807.474	1164.05	2.0103	781.91	1189.99	322.592	711.014	1155.3	149.807	790.728	882.991	-203.654	502.212	892.186	-221.051	515.288	899.021	-136.59	422.268	908.873	-145.239	333.978	880.466	-128.955	752.848	858.67	485.472	472.693	883.185	526.66	470.285	905.144	444.225	376.819	924.344	461.813	286.859	885.401	437.653
80	0.79	727.071	1400.88	186.081	759.977	1383.21	105.772	765	1356.58	252.843	807.458	1164.08	2.04025	781.911	1190.01	322.614	711.065	1155.28	149.836	790.781	882.995	-203.746	502.187	892.225	-221.028	515.358	899.021	-136.584	422.246	908.879	-145.218	333.999	880.483	-128.956	752.818	858.665	485.481	472.7	883.218	526.674	470.315	905.154	444.252	376.855	924.355	461.85	286.882	885.412	437.661
81	0.8	727.024	1400.88	186.05	760.005	1383.15	105.705	764.935	1356.62	252.814	807.407	1164.09	2.06496	781.924	1190.02	322.644	711.092	1155.26	149.857	790.696	883.027	-203.646	502.216	892.208	-221.028	515.513	898.979	-136.584	422.275	908.876	-145.196	334.037	880.485	-128.953	752.823	858.683	485.517	472.648	883.226	526.7	470.321	905.14	444.252	376.889	924.315	461.825	286.896	885.407	437.67
82	0.81	726.869	1400.88	185.991	760.009	1383.09	105.657	764.84	1356.67	252.792	807.316	1164.06	2.08689	781.931	1190.04	322.684	711.115	1155.25	149.887	790.604	883.087	-203.516	502.264	892.178	-221.057	515.55	898.976	-136.587	422.358	908.864	-145.215	334.063	880.475	-128.948	752.851	858.703	485.555	472.647	883.209	526.702	470.34	905.119	444.235	376.836	924.327	461.831	286.881	885.402	437.667
83	0.82	726.621	1400.92	185.925	759.908	1383.06	105.621	764.731	1356.73	252.742	807.198	1164.05	2.09464	781.909	1190.05	322.705	711.087	1155.25	149.919	790.631	883.116	-203.641	502.279	892.169	-221.072	515.57	898.983	-136.59	422.329	908.838	-145.211	334.063	880.461	-128.956	752.828	858.687	485.556	472.651	883.187	526.701	470.327	905.103	444.23	376.847	924.342	461.821	286.888	885.394	437.677
84	0.83	726.255	1401	185.859	759.779	1382.99	105.56	764.641	1356.79	252.691	807.029	1164.02	2.09117	781.884	1190.07	322.739	711.058	1155.24	149.955	790.604	883.212	-203.567	502.257	892.177	-221.082	515.492	899.053	-136.603	422.291	908.857	-145.215	334.049	880.471	-128.972	752.843	858.72	485.561	472.634	883.146	526.683	470.303	905.092	444.234	376.829	924.355	461.806	286.859	885.385	437.67
85	0.84	725.905	1401.08	185.764	759.73	1382.91	105.468	764.502	1356.87	252.634	806.847	1163.98	2.07254	781.881	1190.1	322.792	711.014	1155.27	149.985	790.735	883.227	-203.843	502.237	892.178	-221.107	515.427	899.12	-136.636	422.29	908.897	-145.271	334.028	880.476	-128.999	752.855	858.758	485.581	472.625	883.132	526.705	470.288	905.101	444.24	376.785	924.343	461.81	286.834	885.393	437.662
86	0.85	725.509	1401.16	185.692	759.737	1382.83	105.345	764.366	1356.96	252.538	806.674	1163.97	2.03611	781.892	1190.14	322.844	710.984	1155.32	150	790.705	883.319	-203.98	502.221	892.181	-221.154	515.365	899.199	-136.675	422.298	908.945	-145.366	334.003	880.485	-129.031	752.851	858.784	485.623	472.61	883.141	526.719	470.265	905.127	444.236	376.788	924.307	461.824	286.828	885.4	437.653
87	0.86	725.364	1401.2	185.612	759.696	1382.76	105.226	764.227	1357.08	252.446	806.436	1163.97	2.01126	781.883	1190.19	322.905	710.982	1155.34	150.059	790.66	883.491	-204.076	502.183	892.173	-221.195	515.226	899.342	-136.708	422.235	909.051	-145.458	333.944	880.512	-129.123	752.838	858.82	485.64	472.606	883.141	526.702	470.276	905.159	444.256	376.801	924.3	461.836	286.852	885.391	437.664
88	0.87	725.422	1401.18	185.479	759.62	1382.7	105.151	764.117	1357.13	252.3	806.179	1164.01	2.00598	781.872	1190.26	322.976	710.993	1155.37	150.127	790.582	883.707	-204.164	502.149	892.187	-221.237	515.046	899.562	-136.747	422.267	909.148	-145.531	333.9	880.563	-129.285	752.853	858.901	485.687	472.6	883.147	526.702	470.285	905.175	444.286	376.825	924.301	461.855	286.888	885.38	437.672
89	0.88	725.656	1401.09	185.26	759.592	1382.6	105.049	764.018	1357.06	252.071	805.948	1164.02	2.00223	781.896	1190.34	323.062	711.018	1155.4	150.19	790.496	883.948	-204.229	502.141	892.192	-221.326	514.957	899.778	-136.826	422.359	909.254	-145.681	333.936	880.593	-129.485	752.877	858.984	485.749	472.604	883.168	526.715	470.296	905.193	444.315	376.871	924.282	461.85	286.88	885.391	437.662
90	0.89	725.905	1401.05	185.03	759.637	1382.52	104.905	763.867	1357.15	251.934	805.712	1164.05	1.97801	781.921	1190.42	323.114	710.986	1155.44	150.243	790.358	884.239	-204.321	502.086	892.267	-221.485	515.069	899.954	-137.006	422.414	909.373	-145.869	333.943	880.632	-129.739	752.887	859.09	485.831	472.628	883.203	526.71	470.327	905.214	444.321	376.876	924.27	461.82	286.847	885.408	437.645
91	0.9	726.201	1401	184.739	759.624	1382.44	104.751	763.706	1357.29	251.823	805.439	1164.11	1.90955	781.905	1190.51	323.172	710.939	1155.47	150.312	790.186	884.501	-204.447	501.962	892.502	-221.674	515.052	900.245	-137.102	422.379	909.508	-146.068	333.921	880.667	-130.08	752.898	859.194	485.908	472.607	883.241	526.71	470.319	905.214	444.299	376.792	924.313	461.77	286.834	885.422	437.624
92	0.91	726.301	1400.98	184.453	759.573	1382.37	104.622	763.531	1357.45	251.698	805.189	1164.19	1.83038	781.867	1190.61	323.234	710.905	1155.52	150.362	790.057	884.746	-204.588	501.842	892.832	-221.857	514.859	900.718	-137.163	422.245	909.678	-146.319	333.899	880.714	-130.532	752.877	859.284	485.972	472.573	883.289	526.72	470.302	905.231	444.303	376.79	924.323	461.762	286.838	885.423	437.614
93	0.92	726.24	1401.02	184.191	759.507	1382.3	104.538	763.329	1357.62	251.573	804.991	1164.3	1.78189	781.81	1190.72	323.314	710.807	1155.57	150.422	789.9	885.005	-204.764	501.705	893.209	-222.041	514.688	901.334	-137.285	422.046	909.912	-146.603	333.899	880.785	-131.148	752.859	859.377	486.029	472.577	883.325	526.734	470.306	905.257	444.33	376.792	924.327	461.772	286.857	885.421	437.614
94	0.93	726.193	1401.07	183.851	759.443	1382.21	104.406	763.12	1357.76	251.404	804.763	1164.4	1.75307	781.749	1190.85	323.392	710.762	1155.57	150.458	789.828	885.374	-204.938	501.49	893.644	-222.252	514.638	901.935	-137.476	421.747	910.251	-146.914	333.86	880.855	-131.913	752.844	859.485	486.094	472.574	883.314	526.747	470.288	905.291	444.363	376.786	924.317	461.801	286.871	885.417	437.616
95	0.94	726.11	1401.16	183.403	759.47	1382.16	104.199	762.922	1357.95	251.203	804.572	1164.51	1.80768	781.652	1190.97	323.491	710.693	1155.6	150.492	789.729	885.785	-205.101	501.225	894.171	-222.462	514.554	902.574	-137.718	421.407	910.72	-147.291	333.596	880.994	-132.648	752.791	859.569	486.165	472.564	883.316	526.766	470.308	905.31	444.376	376.805	924.315	461.783	286.852	885.408	437.593
96	0.95	726.02	1401.27	182.942	759.56	1382.09	103.936	762.703	1358.19	251.008	804.422	1164.63	1.95579	781.551	1191.09	323.61	710.565	1155.63	150.571	789.482	886.125	-205.259	500.938	894.796	-222.605	514.409	903.377	-137.946	421.017	911.312	-147.621	333.343	881.246	-133.391	752.772	859.682	486.273	472.531	883.331	526.778	470.359	905.335	444.409	376.786	924.296	461.802	286.837	885.418	437.594
97	0.96	725.801	1401.46	182.534	759.627	1382.02	103.669	762.497	1358.46	250.81	804.236	1164.74	2.12357	781.42	1191.24	323.747	710.427	1155.67	150.695	789.167	886.451	-205.39	500.566	895.559	-222.721	513.165	905.034	-137.606	420.52	912.057	-147.866	333.063	881.601	-134	752.719	859.785	486.393	472.546	883.337	526.809	470.381	905.383	444.454	376.788	924.268	461.835	286.865	885.43	437.627
98	0.97	725.345	1401.68	182.177	759.68	1381.94	103.346	762.233	1358.74	250.576	803.992	1164.83	2.30677	781.254	1191.37	323.86	710.262	1155.73	150.785	788.91	886.773	-205.477	500.179	896.414	-222.893	510.345	907.839	-136.63	420.016	912.931	-148.134	332.773	881.952	-134.365	752.689	859.874	486.531	472.543	883.36	526.817	470.375	905.434	444.501	376.769	924.284	461.829	286.871	885.434	437.645
99	0.98	724.704	1401.93	181.847	759.702	1381.86	102.978	761.907	1358.99	250.264	803.674	1164.91	2.48348	781.03	1191.47	323.923	710.099	1155.78	150.848	788.638	887.111	-205.627	499.935	897.297	-223.144	509.39	909.51	-136.619	419.579	913.996	-148.531	332.528	882.296	-134.732	752.669	859.959	486.638	472.505	883.366	526.823	470.344	905.444	444.502	376.758	924.316	461.789	286.815	885.425	437.625
100	0.99	724.464	1402.01	181.435	759.768	1381.74	102.53	761.583	1359.25	249.897	803.288	1164.99	2.65524	780.821	1191.53	323.975	709.975	1155.78	150.883	788.271	887.494	-205.816	499.685	898.275	-223.367	509.111	910.963	-136.935	418.934	915.228	-149.012	332.18	882.846	-135.214	752.713	860.073	486.74	472.46	883.375	526.816	470.331	905.428	444.473	376.752	924.309	461.752	286.773	885.409	437.583
101	1	724.637	1401.96	180.939	759.784	1381.58	102.088	761.271	1359.51	249.57	802.821	1165.05	2.8221	780.603	1191.6	324.048	709.793	1155.81	150.934	787.885	887.95	-206.027	499.245	899.309	-223.473	509.052	912.716	-137.315	418.245	916.672	-149.558	331.732	883.738	-135.778	752.769	860.178	486.841	472.44	883.359	526.815	470.332	905.419	444.464	376.732	924.298	461.749	286.775	885.402	437.56
102	1.01	724.844	1401.87	180.338	759.818	1381.41	101.631	760.913	1359.81	249.291	802.304	1165.1	3.00291	780.371	1191.68	324.142	709.531	1155.88	151.063	787.512	888.373	-206.282	498.736	900.242	-223.389	508.776	914.836	-137.558	417.558	918.517	-150.084	331.328	885.128	-136.417	752.773	860.25	486.925	472.398	883.356	526.826	470.306	905.423	444.475	376.702	924.313	461.741	286.762	885.398	437.55
103	1.02	724.67	1401.93	179.611	759.822	1381.24	101.221	760.487	1360.1	248.982	801.76	1165.15	3.19103	780.157	1191.76	324.245	709.098	1155.95	151.28	787.052	888.738	-206.56	498.285	901.115	-223.183	508.676	917.266	-137.827	416.773	920.745	-150.533	330.986	887.323	-137.108	752.812	860.335	487.006	472.4	883.36	526.853	470.349	905.451	444.498	376.737	924.282	461.741	286.752	885.402	437.54
104	1.03	724.43	1402.03	178.948	759.775	1381.11	100.86	760.081	1360.39	248.658	801.222	1165.23	3.38611	779.975	1191.85	324.359	708.71	1156.04	151.509	786.633	889.058	-206.798	497.878	902.155	-222.9	508.27	919.943	-137.923	416.121	923.13	-151.029	330.563	890.175	-137.643	752.874	860.408	487.078	472.429	883.329	526.852	470.394	905.476	444.516	376.773	924.272	461.732	286.764	885.407	437.538
105	1.04	724.054	1402.13	178.377	759.757	1381.01	100.478	759.649	1360.69	248.32	800.753	1165.32	3.57346	779.795	1191.92	324.477	708.439	1156.04	151.696	786.238	889.327	-206.972	497.429	903.439	-222.526	508.11	923.025	-138.096	415.587	926.016	-151.545	330.156	893.511	-137.873	752.947	860.477	487.186	472.416	883.335	526.852	470.41	905.461	444.536	376.784	924.288	461.736	286.789	885.412	437.548
106	1.05	723.289	1402.33	177.857	759.845	1380.87	99.9831	759.157	1361	247.966	800.298	1165.43	3.73986	779.594	1192.02	324.599	708.154	1156.08	151.835	785.727	889.543	-207.138	496.899	904.86	-222.007	508.14	926.375	-138.27	415.102	929.258	-151.963	329.712	897.222	-137.834	752.967	860.533	487.273	472.376	883.36	526.873	470.435	905.456	444.544	376.784	924.281	461.73	286.809	885.415	437.559
107	1.06	723.031	1402.33	177.262	759.896	1380.68	99.494	758.658	1361.32	247.565	799.926	1165.54	3.87283	779.37	1192.12	324.692	707.829	1156.1	151.913	785.157	889.759	-207.318	496.295	906.406	-221.309	508.186	930.009	-138.359	414.673	932.923	-152.208	329.225	901.405	-137.526	752.965	860.562	487.341	472.375	883.374	526.904	470.4	905.472	444.544	376.765	924.287	461.71	286.787	885.406	437.548
108	1.07	723.255	1402.22	176.479	759.908	1380.46	98.9236	758.201	1361.61	247.145	799.657	1165.65	3.96381	779.143	1192.19	324.743	707.481	1156.04	151.971	784.495	890.016	-207.375	495.658	908.279	-220.397	508.201	934.118	-138.305	414.106	937.086	-152.099	328.751	906.292	-136.872	752.973	860.607	487.416	472.364	883.376	526.885	470.361	905.47	444.528	376.709	924.312	461.721	286.765	885.393	437.531
109	1.08	723.171	1402.25	175.537	759.91	1380.2	98.3508	757.696	1361.88	246.659	799.469	1165.74	4.06732	778.884	1192.27	324.807	707.157	1155.98	152.03	783.677	890.345	-207.253	495.611	910.158	-218.941	508.37	938.68	-138.172	413.461	941.69	-151.79	328.25	911.955	-135.906	753.031	860.687	487.486	472.339	883.376	526.878	470.336	905.457	444.532	376.656	924.3	461.741	286.735	885.379	437.534
110	1.09	722.548	1402.38	174.735	759.777	1379.95	97.7879	757.12	1362.17	246.106	799.325	1165.81	4.15323	778.624	1192.34	324.86	706.845	1155.96	152.08	782.84	890.624	-207.314	495.984	912.21	-216.75	508.546	943.547	-137.898	412.906	946.71	-151.376	327.896	918.176	-134.837	753.04	860.745	487.546	472.273	883.366	526.912	470.324	905.462	444.558	376.587	924.293	461.743	286.727	885.373	437.546
111	1.1	721.807	1402.52	174.007	759.675	1379.67	97.1953	756.492	1362.47	245.484	799.198	1165.87	4.24275	778.374	1192.4	324.884	706.522	1155.95	152.142	781.946	890.853	-207.463	495.628	915.208	-215.006	508.578	948.727	-137.39	412.794	952.201	-150.694	327.756	924.953	-133.502	753.07	860.799	487.6	472.219	883.354	526.921	470.306	905.479	444.589	376.599	924.242	461.742	286.711	885.375	437.565
112	1.11	721.676	1402.43	173.161	759.532	1379.4	96.5945	755.912	1362.79	244.823	799.138	1165.95	4.34958	778.157	1192.46	324.904	706.336	1155.9	152.16	781.096	891.058	-207.699	495.152	918.844	-213.249	508.502	954.219	-136.589	412.986	958.276	-149.756	327.666	932.287	-131.631	753.077	860.844	487.625	472.216	883.32	526.93	470.309	905.47	444.595	376.574	924.25	461.764	286.715	885.372	437.578
113	1.12	721.95	1402.25	172.077	759.458	1379.12	95.9407	755.436	1363.11	244.176	799.106	1166.06	4.45932	777.965	1192.51	324.927	706.253	1155.84	152.148	780.244	891.354	-208.11	494.682	923.04	-211.369	508.863	960.128	-135.664	413.266	964.795	-148.403	327.752	940.094	-129.171	753.078	860.898	487.656	472.208	883.348	526.944	470.324	905.475	444.604	376.625	924.269	461.778	286.734	885.383	437.576
114	1.13	721.479	1402.36	170.955	759.5	1378.82	95.15	754.984	1363.49	243.483	799.085	1166.18	4.55845	777.797	1192.56	324.932	706.164	1155.79	152.087	779.225	891.899	-208.57	493.531	927.486	-209.59	509.642	965.925	-134.883	413.58	971.709	-146.777	327.969	948.515	-126.307	753.076	860.949	487.694	472.248	883.393	526.943	470.338	905.504	444.602	376.662	924.301	461.721	286.725	885.387	437.555
115	1.14	720.563	1402.56	169.953	759.68	1378.5	94.238	754.458	1363.92	242.712	799.081	1166.31	4.65041	777.668	1192.64	324.928	706.037	1155.81	152.021	777.947	892.526	-208.85	491.181	932.192	-207.963	510.295	972.034	-133.69	414.025	978.888	-144.826	328.284	957.607	-123.117	753.077	860.996	487.729	472.249	883.433	526.939	470.342	905.519	444.588	376.668	924.33	461.682	286.703	885.4	437.507
116	1.15	720.573	1402.41	168.704	759.817	1378.14	93.3392	753.929	1364.34	241.839	799.104	1166.49	4.74362	777.56	1192.73	324.902	705.905	1155.82	151.968	776.782	892.997	-209.415	489.666	937.421	-205.633	510.93	978.52	-132.256	414.739	986.497	-142.494	328.757	967.239	-119.639	753.1	861.073	487.755	472.196	883.442	526.926	470.313	905.541	444.562	376.624	924.333	461.622	286.681	885.41	437.475
117	1.16	720.752	1402.25	167.341	759.852	1377.75	92.4667	753.416	1364.77	240.907	799.18	1166.66	4.85114	777.472	1192.81	324.887	705.855	1155.8	151.922	775.276	893.559	-209.935	488.688	942.841	-203.032	511.695	985.13	-130.629	415.47	994.522	-139.968	329.628	977.184	-115.804	753.102	861.137	487.798	472.211	883.442	526.93	470.323	905.538	444.562	376.584	924.3	461.605	286.654	885.409	437.479
118	1.17	719.907	1402.38	166.154	759.834	1377.34	91.5626	752.874	1365.16	240.007	799.278	1166.79	4.98144	777.383	1192.86	324.872	705.871	1155.75	151.871	773.447	894.25	-210.417	488.028	948.491	-200.068	512.815	992.019	-129.036	416.421	1002.81	-137.327	330.523	987.598	-111.453	753.121	861.216	487.859	472.218	883.419	526.943	470.32	905.499	444.582	376.559	924.243	461.647	286.654	885.381	437.49
119	1.18	719.91	1402.17	164.717	759.95	1376.88	90.6307	752.33	1365.53	239.09	799.383	1166.91	5.13058	777.313	1192.92	324.828	705.873	1155.67	151.806	771.604	894.989	-210.883	487.208	954.445	-196.8	514.198	999.253	-127.3	417.703	1011.33	-134.51	331.64	998.391	-106.818	753.144	861.329	487.911	472.229	883.411	526.943	470.283	905.457	444.585	376.528	924.182	461.677	286.653	885.35	437.499
120	1.19	720.299	1401.91	163.228	760.292	1376.44	89.5988	751.706	1365.93	238.101	799.469	1167.07	5.2751	777.256	1193.01	324.771	705.887	1155.6	151.727	769.624	895.873	-211.383	486.564	960.494	-193.239	515.647	1006.68	-125.646	419.161	1020.16	-131.507	333.462	1009.28	-102.231	753.183	861.473	487.934	472.219	883.407	526.966	470.292	905.453	444.583	376.531	924.152	461.699	286.636	885.323	437.506
121	1.2	719.765	1401.97	161.826	760.694	1376.01	88.5502	751.089	1366.4	237.032	799.336	1167.47	5.42954	777.198	1193.09	324.725	705.843	1155.62	151.666	767.603	896.868	-211.916	486.154	966.659	-189.287	517.299	1014.51	-123.784	420.803	1029.23	-128.339	335.595	1020.57	-97.2955	753.156	861.589	487.95	472.23	883.42	526.973	470.293	905.479	444.593	376.52	924.168	461.713	286.632	885.319	437.516
122	1.21	719.782	1401.85	160.226	761.015	1375.54	87.4996	750.602	1366.89	235.983	799.28	1167.83	5.62064	777.149	1193.19	324.682	705.69	1155.72	151.576	765.606	898.007	-212.415	485.614	973.131	-185.154	519.281	1022.91	-121.961	422.433	1038.51	-124.965	337.767	1032.42	-92.1235	753.104	861.688	487.942	472.227	883.468	526.991	470.249	905.532	444.605	376.517	924.198	461.745	286.62	885.341	437.511
123	1.22	719.723	1401.8	158.83	761.292	1375.11	86.4345	750.261	1367.33	234.97	799.878	1167.73	5.77726	777.135	1193.29	324.607	705.625	1155.83	151.444	763.429	899.214	-212.973	485.242	979.778	-180.867	521.379	1031.21	-120.057	424.268	1047.96	-121.318	339.788	1044.03	-86.8164	753.147	861.839	487.95	472.268	883.494	526.981	470.232	905.627	444.612	376.566	924.233	461.702	286.606	885.388	437.494
124	1.23	719.212	1401.91	157.369	761.63	1374.66	85.2903	749.774	1367.78	233.835	800.19	1167.88	5.91508	777.123	1193.37	324.519	705.628	1155.94	151.318	760.89	900.347	-213.535	484.841	986.516	-176.268	523.386	1038.95	-118.003	426.654	1057.58	-117.653	342.931	1056.09	-81.368	753.194	861.977	487.931	472.281	883.545	526.948	470.242	905.685	444.596	376.587	924.296	461.67	286.589	885.409	437.477
125	1.24	719.293	1401.72	155.784	762.116	1374.2	84.1357	749.382	1368.25	232.654	800.417	1168.05	6.07008	777.152	1193.43	324.439	705.691	1155.98	151.199	758.061	901.511	-214.066	484.789	993.448	-171.468	525.79	1047.12	-116.143	429.413	1067.19	-113.92	347.806	1068.66	-75.4483	753.171	862.05	487.871	472.289	883.578	526.907	470.25	905.695	444.572	376.574	924.309	461.67	286.57	885.404	437.459
126	1.25	719.413	1401.5	154.408	762.581	1373.79	83.1414	748.988	1368.68	231.583	800.868	1168.19	5.83912	777.174	1193.46	324.353	705.741	1156.01	151.08	755.178	902.875	-214.704	484.929	1000.47	-166.357	528.097	1055.36	-114.042	432.256	1076.93	-109.967	352.51	1081.32	-69.4811	753.107	862.09	487.807	472.275	883.577	526.892	470.234	905.656	444.546	376.507	924.275	461.666	286.544	885.387	437.442
127	1.26	719.49	1401.36	152.849	762.92	1373.32	82.2019	748.583	1369.01	230.6	801.414	1168.3	5.49739	777.223	1193.47	324.274	705.96	1155.99	150.949	752.448	904.286	-215.408	485.301	1007.55	-160.924	531.252	1063.2	-112.068	435.463	1086.6	-105.891	357	1094.08	-62.8795	753.093	862.156	487.759	472.239	883.548	526.906	470.222	905.625	444.528	376.511	924.177	461.667	286.542	885.349	437.437
128	1.27	719.385	1401.27	151.446	763.218	1372.79	81.2302	748.16	1369.33	229.508	801.161	1168.43	6.29729	777.307	1193.47	324.191	706.232	1155.93	150.808	749.64	905.827	-216.047	485.834	1014.73	-155.4	534.125	1071.18	-109.685	439.081	1096.44	-101.881	361.966	1106.95	-56.428	753.082	862.208	487.688	472.262	883.525	526.911	470.196	905.589	444.512	376.52	924.146	461.696	286.548	885.312	437.441
129	1.28	719.625	1401.05	150.167	763.623	1372.36	80.2142	747.859	1369.7	228.386	801.265	1168.58	6.61612	777.403	1193.48	324.098	706.48	1155.95	150.669	746.385	907.638	-216.559	486.451	1022.21	-149.695	537.237	1079.07	-107.381	442.586	1106.26	-97.7764	367.318	1120.01	-50.0898	753.046	862.238	487.601	472.315	883.54	526.892	470.213	905.554	444.502	376.528	924.15	461.72	286.578	885.3	437.443
130	1.29	720.224	1400.78	148.698	764.131	1371.92	79.161	747.648	1370.03	227.4	801.421	1168.72	6.7966	777.515	1193.51	324.021	706.655	1156.02	150.527	742.975	909.415	-217.02	487.198	1029.75	-144.009	540.005	1086.43	-104.935	446.586	1116.06	-93.4427	373.299	1133.17	-43.9422	753.025	862.28	487.522	472.357	883.583	526.892	470.202	905.597	444.506	376.551	924.176	461.737	286.584	885.32	437.451
131	1.3	719.711	1400.91	147.427	764.632	1371.45	78.1528	747.519	1370.36	226.397	801.586	1168.86	6.95467	777.674	1193.55	323.944	706.807	1156.12	150.369	739.592	911.308	-217.597	488.045	1037.52	-138.225	542.714	1093.46	-102.444	451.391	1125.52	-88.5905	379.468	1146.41	-37.7624	753.024	862.313	487.454	472.428	883.621	526.885	470.22	905.68	444.523	376.519	924.223	461.73	286.591	885.347	437.473
132	1.31	719.671	1400.81	146.067	765.059	1370.99	77.2643	747.449	1370.71	225.291	801.778	1169	7.11291	777.899	1193.6	323.851	707.071	1156.19	150.181	736.052	913.403	-218.123	489.127	1045.31	-132.452	545.951	1100.8	-99.9483	456.524	1134.88	-83.5175	385.965	1158.76	-31.3978	753.005	862.335	487.387	472.438	883.636	526.856	470.229	905.717	444.499	376.532	924.221	461.718	286.595	885.378	437.468
133	1.32	720.416	1400.45	144.635	765.481	1370.54	76.4052	747.246	1371.07	224.265	801.952	1169.16	7.29601	778.146	1193.63	323.752	707.261	1156.27	150.05	732.27	915.625	-218.454	490.378	1053.2	-126.685	549.531	1108.23	-97.352	460.473	1144.75	-79.7847	392.122	1171.26	-25.8064	752.965	862.343	487.312	472.429	883.64	526.851	470.212	905.758	444.488	376.561	924.208	461.707	286.587	885.394	437.456
134	1.33	720.49	1400.4	143.549	765.93	1370.09	75.5175	747.076	1371.38	223.387	802.164	1169.33	7.54984	778.413	1193.65	323.671	707.533	1156.29	149.929	728.579	917.891	-218.922	491.789	1061.09	-120.939	553.222	1115.5	-94.7868	465.253	1154.11	-75.3828	399.585	1183.16	-19.3214	752.949	862.343	487.24	472.416	883.637	526.851	470.18	905.776	444.49	376.511	924.201	461.716	286.594	885.402	437.458
135	1.34	720.376	1400.36	142.343	766.362	1369.68	74.6472	746.968	1371.66	222.497	802.468	1169.53	7.87077	778.67	1193.65	323.608	707.812	1156.29	149.839	724.863	920.179	-219.311	493.473	1068.89	-115.152	556.716	1122.31	-92.274	470.578	1163.03	-70.7741	408.551	1194.7	-12.412	752.944	862.327	487.159	472.421	883.628	526.828	470.193	905.761	444.495	376.524	924.181	461.726	286.611	885.406	437.473
136	1.35	720.72	1400.11	141.01	766.833	1369.25	73.8128	746.864	1371.94	221.463	802.8	1169.77	8.19394	778.94	1193.61	323.533	708.125	1156.26	149.728	721.09	922.631	-219.41	495.227	1076.67	-109.286	560.411	1129.13	-89.8983	475.972	1171.86	-66.3644	417.021	1205.98	-6.34558	752.944	862.295	487.074	472.465	883.627	526.811	470.216	905.739	444.487	376.565	924.149	461.732	286.635	885.389	437.479
137	1.36	720.999	1399.9	139.977	767.275	1368.83	72.9776	746.858	1372.19	220.477	803.122	1170	8.5198	779.232	1193.57	323.416	708.314	1156.21	149.604	717.157	925.014	-219.638	497.378	1084.23	-103.437	564.289	1135.82	-87.3555	481.742	1180.29	-62.2375	425.461	1216.83	-0.61987	752.948	862.258	486.968	472.529	883.632	526.795	470.221	905.672	444.435	376.575	924.161	461.693	286.643	885.364	437.454
138	1.37	721.343	1399.76	139.005	767.667	1368.46	72.2088	746.963	1372.38	219.619	803.403	1170.23	8.83354	779.465	1193.54	323.307	708.449	1156.18	149.502	713.244	927.592	-219.843	499.823	1091.74	-97.6249	568.207	1142.24	-84.9461	487.577	1188.39	-57.9613	434.063	1227.35	4.94443	752.998	862.243	486.869	472.594	883.653	526.778	470.225	905.6	444.391	376.601	924.219	461.692	286.662	885.348	437.438
139	1.38	721.783	1399.69	137.811	768.078	1368.12	71.4947	746.985	1372.62	218.844	803.669	1170.51	9.21531	779.68	1193.55	323.249	708.411	1156.43	149.498	709.356	930.232	-219.936	502.495	1099.17	-91.7804	571.949	1148.52	-82.5144	493.215	1196.21	-53.358	442.882	1237.56	10.4988	753.057	862.252	486.808	472.659	883.66	526.761	470.253	905.593	444.361	376.625	924.24	461.695	286.69	885.342	437.429
140	1.39	721.826	1399.69	136.779	768.438	1367.73	70.7884	746.888	1372.94	218.066	803.898	1170.83	9.67458	779.869	1193.58	323.204	708.044	1156.98	149.592	705.31	933.005	-219.993	506.17	1106.08	-85.8388	576.11	1154.65	-79.9724	499.122	1203.9	-48.8989	451.924	1247.44	15.9955	753.094	862.265	486.743	472.691	883.668	526.754	470.263	905.607	444.345	376.623	924.223	461.666	286.706	885.347	437.439
141	1.4	721.616	1399.73	135.984	768.876	1367.38	70.1355	746.8	1373.26	217.273	804.075	1171.14	10.1559	780.007	1193.6	323.171	708.038	1157.1	149.566	701.154	935.973	-219.811	511.071	1112.41	-79.8905	580.3	1160.5	-77.2823	505.211	1211.43	-44.4462	461.124	1256.9	21.2968	753.088	862.244	486.659	472.719	883.642	526.746	470.284	905.622	444.362	376.644	924.199	461.658	286.744	885.373	437.451
142	1.41	721.824	1399.65	135.179	769.243	1367.08	69.54	746.875	1373.52	216.586	804.187	1171.41	10.6127	780.098	1193.63	323.143	708.087	1157.11	149.554	697.003	938.889	-219.673	515.067	1119.09	-74.2791	584.65	1166.17	-74.7362	511.59	1218.6	-40.0899	470.062	1266.02	26.7034	753.041	862.205	486.567	472.716	883.642	526.735	470.325	905.67	444.378	376.657	924.177	461.671	286.78	885.394	437.46
143	1.42	722.535	1399.48	134.252	769.568	1366.83	69.0152	747.062	1373.73	215.977	804.293	1171.59	11.0918	780.172	1193.63	323.139	708.157	1157.1	149.587	693.033	942.068	-219.523	518.811	1125.75	-69.0184	589.006	1171.41	-72.1983	518.209	1225.46	-35.699	478.912	1274.7	32.3296	753.008	862.201	486.518	472.663	883.634	526.742	470.338	905.706	444.41	376.635	924.177	461.701	286.798	885.411	437.477
144	1.43	723.339	1399.29	133.356	769.943	1366.58	68.5013	747.167	1373.98	215.351	804.513	1171.79	11.585	780.27	1193.62	323.157	708.318	1157.08	149.595	688.914	945.152	-219.347	522.65	1132.29	-63.9424	593.918	1176.47	-69.4924	524.97	1232.05	-31.2764	489.154	1282.37	37.4211	753.024	862.2	486.514	472.632	883.637	526.753	470.31	905.728	444.453	376.581	924.188	461.728	286.786	885.415	437.513
145	1.44	723.654	1399.3	132.697	770.248	1366.34	67.9942	747.222	1374.25	214.692	804.769	1172.02	12.0758	780.344	1193.58	323.163	708.34	1157.12	149.625	685.014	948.346	-219.218	526.732	1138.46	-59.1123	598.535	1181.17	-66.7976	532.051	1238.36	-27.1237	499.749	1289.81	41.8167	753.029	862.16	486.501	472.645	883.627	526.748	470.255	905.7	444.442	376.589	924.238	461.742	286.758	885.403	437.519
146	1.45	723.488	1399.48	132.212	770.414	1366.11	67.5322	747.343	1374.45	214.101	804.966	1172.23	12.5493	780.364	1193.54	323.16	708.338	1157.19	149.667	681.273	951.451	-218.826	530.697	1144.48	-54.5128	602.966	1185.49	-64.2254	538.852	1244.22	-22.9511	509.82	1296.51	46.4275	752.979	862.092	486.488	472.66	883.615	526.746	470.27	905.668	444.404	376.661	924.232	461.755	286.746	885.381	437.5
147	1.46	723.277	1399.68	131.726	770.692	1365.9	67.0832	747.393	1374.64	213.646	805.076	1172.39	13.0179	780.394	1193.5	323.183	708.213	1157.3	149.708	677.789	954.689	-218.425	534.566	1150.2	-50.1343	607.629	1189.53	-61.49	545.768	1249.66	-18.8552	519.664	1302.57	51.0117	752.992	862.038	486.493	472.724	883.601	526.74	470.285	905.613	444.349	376.665	924.272	461.765	286.743	885.367	437.467
148	1.47	723.08	1399.85	131.227	770.898	1365.72	66.7325	747.383	1374.83	213.261	805.112	1172.6	13.5327	780.45	1193.48	323.232	708.114	1157.38	149.75	674.341	957.959	-217.998	538.662	1155.69	-45.903	612.304	1193.35	-58.7815	552.692	1254.8	-14.8633	529.2	1308.15	55.6737	753.042	861.991	486.526	472.705	883.622	526.716	470.251	905.605	444.317	376.669	924.267	461.73	286.692	885.366	437.443
149	1.48	722.382	1400.28	130.907	771.11	1365.54	66.4381	747.395	1375.03	212.926	805.142	1172.87	14.0865	780.454	1193.47	323.289	708.213	1157.34	149.765	670.883	961.245	-217.62	542.862	1160.78	-41.7517	616.882	1196.94	-56.4035	559.328	1259.43	-10.9458	538.769	1313.17	60.1266	753.034	861.916	486.527	472.666	883.627	526.709	470.24	905.635	444.32	376.666	924.245	461.704	286.657	885.383	437.427
150	1.49	720.493	1401.2	130.993	771.265	1365.38	66.212	747.524	1375.23	212.698	805.239	1173.19	14.6501	780.451	1193.43	323.369	708.336	1157.27	149.847	667.631	964.584	-217.283	547.044	1165.46	-37.7188	621.199	1200.3	-54.1023	565.964	1263.82	-7.17847	548.105	1317.52	64.3223	752.996	861.823	486.532	472.654	883.59	526.717	470.287	905.661	444.366	376.702	924.215	461.719	286.723	885.398	437.454
151	1.5	720.121	1401.41	130.823	771.385	1365.29	66.0472	747.648	1375.42	212.511	805.341	1173.48	15.2576	780.46	1193.37	323.486	708.44	1157.19	149.963	664.585	967.783	-217.07	551.014	1169.85	-33.9081	625.586	1203.5	-51.8535	572.33	1267.76	-3.46134	556.953	1321.54	68.5392	752.991	861.745	486.586	472.659	883.561	526.749	470.318	905.637	444.418	376.669	924.221	461.734	286.773	885.394	437.489
152	1.51	720.247	1401.48	130.621	771.546	1365.19	65.9244	747.73	1375.57	212.323	805.418	1173.75	15.8511	780.432	1193.31	323.606	708.415	1157.17	150.105	661.692	970.916	-216.701	554.875	1173.98	-30.3315	629.904	1206.25	-49.5423	578.728	1271.28	-0.03532	565.461	1324.99	72.6007	753.051	861.695	486.67	472.609	883.535	526.762	470.333	905.62	444.429	376.613	924.219	461.723	286.749	885.406	437.5
153	1.52	720.357	1401.53	130.42	771.674	1365.1	65.8244	747.871	1375.69	212.163	805.477	1174	16.3631	780.418	1193.23	323.727	708.25	1156.99	150.257	659.143	974.024	-216.349	558.68	1177.73	-26.9103	633.663	1208.85	-47.373	584.579	1274.48	3.32181	573.646	1328	76.4343	753.053	861.602	486.713	472.59	883.528	526.774	470.317	905.583	444.43	376.647	924.206	461.724	286.755	885.41	437.485
154	1.53	720.57	1401.57	130.248	771.854	1365.05	65.754	748.089	1375.84	212.064	805.516	1174.24	16.8762	780.413	1193.15	323.856	708.128	1156.61	150.394	656.719	977.111	-215.977	562.31	1181.14	-23.6824	637.247	1211.3	-45.5274	590.297	1277.36	6.46416	581.474	1330.55	80.0125	753.009	861.491	486.73	472.589	883.536	526.795	470.319	905.561	444.429	376.668	924.222	461.72	286.776	885.399	437.49
155	1.54	720.9	1401.65	130.152	771.967	1365.04	65.7049	748.222	1375.97	211.981	805.529	1174.46	17.3586	780.396	1193.07	323.971	708.842	1156.47	150.284	653.993	979.884	-215.478	565.766	1184.33	-20.6776	640.733	1213.41	-43.6999	595.613	1279.92	9.52118	588.836	1332.78	83.4071	753.02	861.404	486.794	472.589	883.527	526.799	470.307	905.544	444.414	376.633	924.278	461.705	286.743	885.412	437.485
156	1.55	721.04	1401.75	130.072	772.007	1365.02	65.6807	748.324	1376.08	211.919	805.551	1174.65	17.8074	780.375	1193.01	324.068	708.981	1156.47	150.293	651.537	982.632	-215	569.185	1187.25	-17.8441	644.056	1215.35	-41.8952	600.634	1282.16	12.3136	595.726	1334.8	86.5781	753.009	861.274	486.834	472.565	883.515	526.778	470.306	905.554	444.397	376.66	924.303	461.704	286.688	885.415	437.451
157	1.56	721.201	1401.8	130.063	772.094	1364.98	65.6765	748.468	1376.17	211.944	805.607	1174.8	18.2416	780.399	1192.94	324.199	708.954	1156.51	150.402	649.344	985.334	-214.602	572.436	1189.84	-15.1019	647.215	1217.23	-40.2949	605.463	1284.25	14.8941	602.073	1336.52	89.5976	752.987	861.137	486.83	472.561	883.484	526.76	470.294	905.549	444.408	376.693	924.293	461.702	286.718	885.399	437.446
158	1.57	721.342	1401.84	130.164	772.194	1364.96	65.7528	748.678	1376.26	212.053	805.754	1174.95	18.717	780.453	1192.88	324.386	708.926	1156.55	150.598	647.318	987.857	-214.154	575.35	1192.2	-12.4514	650.23	1219.37	-39.1103	609.701	1286.19	17.4298	607.839	1337.9	92.4324	752.98	860.997	486.829	472.565	883.424	526.768	470.339	905.548	444.453	376.761	924.244	461.749	286.809	885.393	437.484
159	1.58	721.425	1401.88	130.329	772.269	1364.94	65.8644	748.786	1376.35	212.194	805.959	1175.15	19.2003	780.432	1192.83	324.563	708.995	1156.58	150.749	645.425	990.323	-213.644	577.853	1194.53	-10.0859	652.819	1221.34	-38.0208	613.4	1287.82	19.852	613.178	1339.25	95.0539	752.991	860.895	486.885	472.503	883.379	526.788	470.383	905.555	444.474	376.774	924.224	461.75	286.821	885.405	437.482
160	1.59	721.331	1401.94	130.583	772.248	1364.93	66.0162	748.855	1376.44	212.39	806.175	1175.37	19.6793	780.41	1192.79	324.73	708.926	1156.61	150.927	643.672	992.735	-213.204	580.242	1196.54	-7.82044	655.094	1222.74	-36.3511	616.772	1289.39	22.0919	618.179	1340.44	97.4096	752.977	860.794	486.931	472.431	883.342	526.788	470.384	905.555	444.483	376.67	924.199	461.734	286.816	885.421	437.477
161	1.6	721.319	1402	130.91	772.19	1364.95	66.2374	748.973	1376.49	212.621	806.398	1175.58	20.1291	780.412	1192.75	324.899	708.819	1156.68	151.176	641.947	995.048	-212.754	582.478	1198.37	-5.64861	657.218	1224.09	-35.1144	620.17	1290.79	24.0668	622.507	1341.41	99.7308	752.953	860.687	486.96	472.455	883.32	526.805	470.424	905.537	444.519	376.667	924.22	461.743	286.842	885.428	437.495
162	1.61	721.419	1402.08	131.186	772.291	1365.02	66.4165	749.147	1376.53	212.849	806.568	1175.76	20.5587	780.444	1192.69	325.049	708.904	1156.69	151.373	640.304	997.064	-212.322	584.474	1200.07	-3.78223	658.754	1225.14	-33.7024	623.328	1292.03	25.8983	626.651	1342.24	101.902	752.908	860.534	486.984	472.483	883.337	526.828	470.431	905.514	444.513	376.754	924.278	461.756	286.862	885.428	437.507
163	1.62	721.401	1402.14	131.485	772.366	1365.1	66.5802	749.262	1376.55	213.065	806.668	1175.92	20.9149	780.455	1192.62	325.171	708.927	1156.71	151.494	638.872	998.914	-211.819	586.129	1201.67	-2.03198	660.377	1226.49	-32.7388	625.863	1293.13	27.6792	630.638	1343	103.848	752.917	860.416	487.048	472.422	883.353	526.829	470.383	905.482	444.485	376.758	924.324	461.736	286.798	885.447	437.468
164	1.63	721.39	1402.18	131.769	772.402	1365.16	66.7365	749.354	1376.58	213.329	806.746	1176.07	21.244	780.433	1192.54	325.3	708.805	1156.76	151.628	637.827	1000.87	-211.336	587.515	1203.07	-0.58338	661.625	1227.55	-31.6246	628.073	1294.29	29.391	634.078	1343.53	105.669	752.875	860.268	487.075	472.39	883.354	526.799	470.322	905.445	444.453	376.676	924.346	461.716	286.722	885.454	437.416
165	1.64	721.296	1402.25	132.17	772.508	1365.22	66.9635	749.523	1376.6	213.665	806.917	1176.24	21.5907	780.434	1192.47	325.456	708.898	1156.78	151.811	636.708	1002.62	-210.92	588.928	1204.36	1.01888	663.132	1229.13	-31.1063	629.994	1295.12	31.03	636.888	1343.86	107.539	752.804	860.086	487.07	472.426	883.336	526.814	470.35	905.431	444.464	376.744	924.351	461.712	286.757	885.438	437.437
166	1.65	721.363	1402.3	132.585	772.548	1365.3	67.2499	749.744	1376.58	214.032	807.083	1176.36	21.9289	780.476	1192.36	325.602	709.047	1156.75	151.992	635.581	1004.21	-210.492	590.232	1205.49	2.42322	664.048	1229.96	-30.231	631.662	1295.87	32.5744	639.173	1344.13	109.28	752.801	859.935	487.102	472.46	883.277	526.816	470.414	905.404	444.491	376.832	924.324	461.752	286.818	885.424	437.472
167	1.66	721.51	1402.31	132.924	772.44	1365.43	67.6018	749.893	1376.53	214.342	807.201	1176.48	22.2011	780.475	1192.28	325.747	708.951	1156.78	152.094	634.204	1005.5	-210.075	591.414	1206.35	3.85522	664.738	1230.62	-29.2781	633.13	1296.72	34.0376	641.03	1344.51	110.911	752.824	859.788	487.155	472.387	883.207	526.812	470.429	905.394	444.5	376.756	924.28	461.761	286.814	885.404	437.477
168	1.67	721.763	1402.37	133.191	772.279	1365.58	67.9832	750.067	1376.52	214.635	807.333	1176.61	22.4679	780.474	1192.21	325.9	708.963	1156.79	152.221	633.304	1006.76	-209.581	592.322	1207.18	5.23902	665.845	1231.9	-28.7463	634.319	1297.4	35.34	642.68	1344.92	112.369	752.841	859.643	487.193	472.312	883.162	526.818	470.416	905.409	444.528	376.739	924.25	461.776	286.826	885.396	437.482
169	1.68	722.009	1402.51	133.512	772.202	1365.73	68.3286	750.39	1376.55	214.993	807.529	1176.74	22.7633	780.477	1192.14	326.061	709.062	1156.78	152.437	632.859	1008.15	-209.099	593.176	1208.02	6.48872	666.477	1232.8	-27.8954	635.306	1297.96	36.5515	644.137	1345.31	113.589	752.837	859.508	487.202	472.346	883.154	526.847	470.484	905.419	444.583	376.839	924.255	461.809	286.896	885.428	437.521
170	1.69	722.208	1402.67	133.946	772.131	1365.9	68.6062	750.674	1376.55	215.322	807.651	1176.87	23.0363	780.508	1192.06	326.189	709.084	1156.84	152.571	632.451	1009.28	-208.806	594.065	1208.71	7.81009	666.666	1233.4	-27.1698	636.11	1298.49	37.6839	645.4	1345.74	114.712	752.881	859.405	487.229	472.419	883.178	526.863	470.519	905.407	444.584	376.804	924.315	461.805	286.923	885.448	437.52
171	1.7	722.277	1402.84	134.389	772.086	1366.05	68.8357	750.791	1376.52	215.559	807.648	1176.97	23.2697	780.5	1191.98	326.249	708.992	1156.89	152.562	631.566	1010.26	-208.324	594.588	1209.3	8.941	666.821	1233.93	-26.5368	636.781	1299.06	38.6755	646.401	1346.07	115.71	752.901	859.313	487.255	472.37	883.151	526.827	470.457	905.395	444.517	376.754	924.351	461.736	286.848	885.457	437.447
172	1.71	722.303	1402.93	134.799	772.099	1366.16	69.1076	750.965	1376.5	215.845	807.663	1177.08	23.5112	780.484	1191.88	326.333	708.89	1156.89	152.63	630.466	1011.16	-207.797	594.902	1209.74	9.88216	667.159	1234.51	-25.8801	637.406	1299.51	39.579	647.26	1346.39	116.629	752.858	859.193	487.248	472.316	883.147	526.789	470.376	905.386	444.479	376.733	924.396	461.69	286.772	885.466	437.404
173	1.72	723.494	1402.52	135.038	772.211	1366.32	69.4352	751.228	1376.48	216.198	807.709	1177.2	23.8061	780.479	1191.77	326.446	709.021	1156.85	152.79	629.711	1011.98	-207.414	595.637	1209.95	10.9405	667.569	1235.13	-25.1551	637.904	1299.79	40.4544	648.057	1346.7	117.575	752.831	859.094	487.239	472.336	883.152	526.802	470.393	905.369	444.493	376.817	924.43	461.716	286.812	885.476	437.435
174	1.73	725.971	1401.6	134.963	772.389	1366.43	69.7018	751.449	1376.44	216.54	807.719	1177.31	24.0893	780.476	1191.67	326.546	709.212	1156.78	152.885	628.659	1012.74	-206.839	596.381	1210.07	12.0612	667.961	1235.64	-24.4993	638.307	1299.97	41.3335	648.9	1346.89	118.46	752.858	859.004	487.245	472.291	883.116	526.825	470.43	905.328	444.503	376.795	924.403	461.743	286.829	885.468	437.45
175	1.74	725.332	1401.92	135.556	772.471	1366.51	69.9878	751.641	1376.4	216.869	807.666	1177.36	24.3087	780.455	1191.55	326.623	709.254	1156.72	152.926	627.191	1013.5	-205.866	596.634	1210.3	12.9703	668.165	1236	-23.9974	638.588	1300.1	42.1781	649.654	1346.96	119.258	752.883	858.889	487.225	472.205	883.032	526.818	470.392	905.284	444.475	376.764	924.311	461.708	286.774	885.451	437.417
176	1.75	724.375	1402.46	136.207	772.543	1366.61	70.2762	751.942	1376.36	217.232	807.649	1177.42	24.5328	780.467	1191.45	326.706	709.248	1156.69	153.083	626.395	1014.05	-205.241	596.733	1210.54	13.7909	668.155	1236.25	-23.5822	638.851	1300.18	43.0212	650.344	1346.95	119.995	752.86	858.76	487.18	472.221	882.97	526.821	470.42	905.264	444.48	376.763	924.279	461.71	286.806	885.436	437.429
177	1.76	726.873	1401.69	136.101	772.683	1366.74	70.5982	752.292	1376.31	217.595	807.692	1177.5	24.7516	780.526	1191.39	326.821	709.381	1156.68	153.243	625.829	1014.56	-204.69	597.173	1210.62	14.6585	668.114	1236.37	-23.1802	639.185	1300.21	43.8107	650.951	1346.89	120.719	752.87	858.634	487.148	472.339	882.932	526.857	470.499	905.262	444.533	376.797	924.297	461.758	286.906	885.42	437.486
178	1.77	726.439	1402.02	136.379	772.814	1366.88	70.8549	752.553	1376.27	217.87	807.699	1177.58	24.9225	780.563	1191.34	326.901	709.384	1156.76	153.305	625.285	1014.97	-204.211	597.719	1210.65	15.476	668.154	1236.42	-22.7227	639.489	1300.23	44.4744	651.557	1346.83	121.339	752.884	858.492	487.133	472.371	882.906	526.864	470.505	905.281	444.539	376.886	924.282	461.768	286.92	885.423	437.497
179	1.78	724.082	1403.1	137.052	772.84	1367.01	71.0467	752.675	1376.26	218.054	807.653	1177.65	25.0177	780.534	1191.32	326.942	709.187	1156.89	153.335	625.015	1015.1	-203.975	598.062	1210.71	16.1968	668.312	1236.42	-22.2262	639.758	1300.26	45.0861	652.046	1346.81	121.851	752.903	858.384	487.116	472.321	882.908	526.827	470.484	905.283	444.498	376.894	924.329	461.718	286.86	885.452	437.459
180	1.79	723.71	1403.42	137.402	772.871	1367.12	71.2589	752.846	1376.27	218.228	807.64	1177.71	25.1072	780.499	1191.31	326.976	709.045	1157	153.426	624.659	1015.25	-203.652	598.423	1210.76	16.8377	668.548	1236.43	-21.7763	640.181	1300.26	45.6602	652.602	1346.77	122.331	752.9	858.301	487.094	472.355	882.95	526.814	470.48	905.307	444.483	376.894	924.385	461.698	286.858	885.479	437.451
181	1.8	723.763	1403.55	137.623	772.965	1367.2	71.4313	753.057	1376.3	218.405	807.666	1177.75	25.2168	780.521	1191.3	327.031	709.076	1157	153.508	624.358	1015.39	-203.309	598.729	1210.77	17.4032	668.866	1236.47	-21.3935	640.717	1300.24	46.1776	653.201	1346.74	122.782	752.846	858.218	487.08	472.411	882.988	526.836	470.513	905.335	444.505	376.928	924.425	461.708	286.905	885.505	437.464
182	1.81	723.84	1403.67	137.833	772.994	1367.24	71.5657	753.213	1376.31	218.545	807.628	1177.75	25.2803	780.511	1191.27	327.065	709.034	1157.02	153.535	623.932	1015.47	-202.931	598.91	1210.73	17.9361	669.159	1236.47	-21.0391	641.201	1300.16	46.6076	653.769	1346.68	123.191	752.825	858.179	487.084	472.351	882.971	526.817	470.501	905.303	444.491	376.88	924.41	461.7	286.854	885.5	437.444
183	1.82	723.851	1403.75	138.022	772.922	1367.26	71.6911	753.312	1376.3	218.639	807.545	1177.71	25.2993	780.475	1191.24	327.081	708.948	1157.02	153.558	623.401	1015.52	-202.53	599.216	1210.62	18.5153	669.414	1236.45	-20.7225	641.632	1300.08	46.9928	654.359	1346.6	123.548	752.845	858.173	487.088	472.237	882.933	526.787	470.43	905.24	444.444	376.808	924.353	461.686	286.814	885.475	437.419
184	1.83	724.934	1403.34	137.938	772.941	1367.29	71.8182	753.49	1376.27	218.75	807.517	1177.67	25.3427	780.478	1191.23	327.109	709.13	1156.94	153.593	623.06	1015.56	-202.155	599.753	1210.49	19.1736	669.677	1236.42	-20.4492	642.06	1300	47.3688	655.104	1346.52	123.923	752.843	858.168	487.076	472.226	882.917	526.808	470.421	905.207	444.446	376.821	924.324	461.697	286.824	885.459	437.439
185	1.84	726.354	1402.73	137.728	772.976	1367.31	71.907	753.652	1376.26	218.851	807.539	1177.65	25.3932	780.506	1191.23	327.134	709.206	1156.91	153.639	622.756	1015.57	-201.829	600.355	1210.38	19.7855	669.924	1236.37	-20.2465	642.494	1299.94	47.6829	655.995	1346.47	124.294	752.838	858.182	487.087	472.294	882.915	526.839	470.452	905.185	444.476	376.906	924.33	461.706	286.857	885.45	437.477
186	1.85	725.452	1403.11	137.971	772.99	1367.3	71.9002	753.681	1376.26	218.867	807.544	1177.64	25.4189	780.494	1191.25	327.126	709.142	1156.93	153.651	622.418	1015.57	-201.502	600.71	1210.37	20.2359	670.159	1236.31	-20.0784	642.966	1299.91	47.9315	656.786	1346.41	124.547	752.892	858.217	487.103	472.296	882.911	526.847	470.406	905.158	444.445	376.833	924.341	461.7	286.821	885.442	437.467
187	1.86	727.083	1402.3	137.483	772.95	1367.28	71.8585	753.668	1376.26	218.832	807.524	1177.63	25.4304	780.473	1191.29	327.097	709.047	1157	153.624	622.083	1015.55	-201.13	600.977	1210.44	20.5635	670.425	1236.24	-19.9361	643.43	1299.92	48.158	657.433	1346.42	124.693	752.91	858.281	487.121	472.299	882.911	526.826	470.392	905.19	444.426	376.796	924.336	461.697	286.791	885.441	437.426
188	1.87	727.526	1402.05	137.32	772.944	1367.27	71.8199	753.724	1376.25	218.825	807.557	1177.64	25.4707	780.478	1191.36	327.107	709.084	1157.05	153.617	621.827	1015.51	-200.677	601.336	1210.51	20.8294	670.68	1236.19	-19.8336	643.932	1299.91	48.3942	658.036	1346.5	124.79	752.919	858.348	487.147	472.355	882.943	526.829	470.43	905.235	444.437	376.837	924.339	461.704	286.835	885.447	437.423
189	1.88	727.693	1401.92	137.215	772.973	1367.23	71.753	753.738	1376.26	218.806	807.569	1177.66	25.5071	780.488	1191.43	327.132	709.025	1157.09	153.662	621.573	1015.46	-200.236	601.62	1210.58	21.0489	670.961	1236.14	-19.7306	644.482	1299.9	48.5645	658.599	1346.61	124.838	752.976	858.433	487.2	472.418	882.957	526.841	470.455	905.267	444.474	376.871	924.355	461.741	286.895	885.451	437.449
190	1.89	727.668	1401.81	137.107	772.86	1367.16	71.6861	753.65	1376.26	218.737	807.499	1177.64	25.5021	780.475	1191.5	327.116	708.942	1157.11	153.665	621.355	1015.39	-199.933	601.904	1210.64	21.2595	671.204	1236.08	-19.6427	644.989	1299.92	48.6447	659.283	1346.75	124.766	752.992	858.537	487.243	472.301	882.936	526.852	470.465	905.277	444.492	376.831	924.328	461.747	286.876	885.463	437.456
191	1.9	727.462	1401.73	136.999	772.752	1367.1	71.5495	753.58	1376.24	218.629	807.422	1177.6	25.4805	780.437	1191.53	327.07	708.954	1157.09	153.608	621.061	1015.28	-199.641	602.289	1210.67	21.4991	671.452	1236	-19.5821	645.498	1299.92	48.6683	660.004	1346.91	124.583	752.937	858.607	487.264	472.218	882.951	526.842	470.497	905.292	444.496	376.805	924.307	461.707	286.856	885.462	437.447
192	1.91	727.432	1401.62	136.885	772.645	1367.05	71.439	753.527	1376.23	218.548	807.373	1177.58	25.4929	780.422	1191.56	327.034	708.998	1157.06	153.608	620.6	1015.18	-199.245	602.839	1210.63	21.8309	671.698	1235.9	-19.4729	645.941	1299.88	48.7167	660.535	1347.05	124.473	752.899	858.666	487.281	472.24	882.986	526.839	470.492	905.298	444.514	376.794	924.307	461.694	286.868	885.46	437.457
193	1.92	727.367	1401.51	136.79	772.48	1366.96	71.3373	753.467	1376.24	218.448	807.322	1177.54	25.4964	780.432	1191.59	327.008	708.975	1157.07	153.609	620.21	1015.12	-198.916	603.299	1210.55	22.2153	671.924	1235.8	-19.3176	646.277	1299.84	48.7839	660.976	1347.16	124.385	752.892	858.738	487.322	472.261	883.017	526.846	470.48	905.29	444.526	376.837	924.301	461.708	286.855	885.459	437.458
194	1.93	727.164	1401.48	136.69	772.342	1366.86	71.156	753.365	1376.24	218.307	807.263	1177.52	25.477	780.414	1191.62	326.957	708.928	1157.09	153.537	619.953	1015.09	-198.758	603.613	1210.45	22.564	672.133	1235.69	-19.1688	646.537	1299.75	48.8509	661.223	1347.31	124.316	752.901	858.813	487.353	472.321	883.066	526.836	470.457	905.292	444.501	376.888	924.304	461.692	286.819	885.452	437.437
195	1.94	727.239	1401.36	136.514	772.223	1366.8	70.9218	753.228	1376.25	218.13	807.228	1177.51	25.4431	780.386	1191.65	326.871	708.972	1157.06	153.442	619.752	1015.09	-198.677	603.933	1210.31	22.9128	672.355	1235.56	-19.0004	646.763	1299.61	48.8962	661.362	1347.47	124.207	752.899	858.877	487.37	472.366	883.088	526.828	470.434	905.275	444.46	376.855	924.345	461.678	286.798	885.438	437.405
196	1.95	727.315	1401.24	136.379	772.151	1366.73	70.7072	753.143	1376.28	217.969	807.249	1177.5	25.4102	780.386	1191.7	326.806	709.023	1157.05	153.383	619.553	1015.11	-198.535	604.28	1210.15	23.3265	672.553	1235.43	-18.8193	646.947	1299.49	49.0198	661.428	1347.58	124.175	752.899	858.933	487.374	472.421	883.108	526.837	470.487	905.293	444.46	376.853	924.353	461.669	286.831	885.43	437.398
197	1.96	727.293	1401.15	136.287	771.998	1366.65	70.5606	753.066	1376.3	217.832	807.263	1177.47	25.3984	780.406	1191.76	326.752	709.062	1157.08	153.369	619.346	1015.15	-198.38	604.569	1210.01	23.7226	672.758	1235.35	-18.565	647.102	1299.37	49.1688	661.506	1347.67	124.225	752.939	859.016	487.394	472.411	883.109	526.841	470.496	905.328	444.487	376.872	924.353	461.667	286.88	885.415	437.417
198	1.97	727.134	1401.06	136.207	771.798	1366.56	70.4078	752.931	1376.31	217.653	807.249	1177.45	25.3728	780.394	1191.84	326.688	708.999	1157.12	153.346	619.095	1015.21	-198.283	604.701	1209.92	24.0406	672.957	1235.24	-18.2969	647.207	1299.24	49.3209	661.564	1347.7	124.303	752.943	859.082	487.396	472.352	883.1	526.844	470.482	905.334	444.485	376.881	924.316	461.685	286.893	885.416	437.425
199	1.98	726.942	1400.95	136.105	771.685	1366.45	70.263	752.812	1376.32	217.47	807.238	1177.43	25.3309	780.393	1191.9	326.623	709.003	1157.13	153.286	618.813	1015.34	-198.158	604.764	1209.89	24.2946	673.16	1235.16	-18.0558	647.274	1299.12	49.4613	661.571	1347.72	124.386	752.916	859.12	487.363	472.33	883.085	526.837	470.521	905.336	444.507	376.852	924.281	461.704	286.888	885.433	437.434
200	1.99	726.76	1400.88	136.022	771.538	1366.39	70.1019	752.682	1376.33	217.317	807.187	1177.39	25.3058	780.361	1191.96	326.575	709.081	1157.12	153.244	618.534	1015.47	-198.019	604.859	1209.83	24.5347	673.344	1235.1	-17.8355	647.362	1299.01	49.6217	661.639	1347.7	124.506	752.918	859.174	487.347	472.314	883.075	526.835	470.528	905.355	444.533	376.839	924.242	461.706	286.921	885.441	437.458
201	2	726.414	1400.86	135.967	771.378	1366.35	69.9713	752.548	1376.37	217.17	807.115	1177.34	25.2953	780.305	1192	326.513	709.072	1157.13	153.186	618.302	1015.58	-197.932	604.957	1209.76	24.7544	673.531	1235.02	-17.6023	647.438	1298.91	49.7498	661.715	1347.63	124.615	752.9	859.201	487.325	472.332	883.082	526.851	470.51	905.371	444.536	376.824	924.266	461.725	286.933	885.436	437.472
202	2.01	725.999	1400.91	135.866	771.213	1366.32	69.8635	752.395	1376.4	217	807.026	1177.3	25.2595	780.267	1192.03	326.429	709.047	1157.18	153.095	617.995	1015.65	-197.885	605.063	1209.67	24.9083	673.708	1234.93	-17.3908	647.489	1298.81	49.8297	661.766	1347.57	124.666	752.888	859.205	487.297	472.342	883.12	526.854	470.464	905.356	444.508	376.806	924.269	461.722	286.882	885.444	437.451
203	2.02	725.814	1400.92	135.697	771.102	1366.29	69.7279	752.252	1376.42	216.829	806.941	1177.27	25.236	780.221	1192.05	326.327	709.013	1157.18	152.971	617.745	1015.69	-197.89	605.19	1209.56	25.0162	673.82	1234.8	-17.299	647.578	1298.68	49.8512	661.857	1347.49	124.647	752.857	859.208	487.246	472.381	883.18	526.837	470.413	905.336	444.449	376.819	924.321	461.703	286.818	885.451	437.419
204	2.03	725.786	1400.91	135.558	771.102	1366.29	69.5836	752.168	1376.42	216.697	806.861	1177.25	25.2048	780.216	1192.06	326.246	709.023	1157.18	152.878	617.63	1015.69	-197.939	605.339	1209.43	25.1033	673.924	1234.64	-17.2467	647.644	1298.53	49.8314	661.936	1347.35	124.589	752.863	859.211	487.195	472.427	883.215	526.822	470.395	905.33	444.423	376.79	924.376	461.668	286.805	885.45	437.415
205	2.04	725.681	1400.93	135.497	770.996	1366.26	69.5272	752.125	1376.43	216.628	806.737	1177.2	25.1819	780.183	1192.06	326.197	708.996	1157.21	152.839	617.501	1015.64	-197.978	605.393	1209.31	25.1373	674.017	1234.48	-17.1688	647.708	1298.36	49.7878	661.999	1347.21	124.539	752.829	859.176	487.139	472.425	883.229	526.798	470.404	905.339	444.403	376.826	924.374	461.655	286.799	885.448	437.411
206	2.05	725.542	1400.92	135.476	770.833	1366.27	69.4979	752.069	1376.41	216.593	806.587	1177.13	25.1443	780.144	1192.06	326.167	708.971	1157.21	152.819	617.363	1015.54	-198.036	605.318	1209.21	25.1461	674.037	1234.27	-17.1301	647.701	1298.18	49.7408	661.947	1347.06	124.513	752.803	859.136	487.066	472.414	883.2	526.789	470.404	905.345	444.424	376.869	924.341	461.683	286.804	885.443	437.415
207	2.06	725.498	1400.84	135.474	770.737	1366.27	69.4932	752.052	1376.39	216.593	806.428	1177.09	25.1094	780.088	1192.04	326.135	708.967	1157.23	152.815	617.242	1015.34	-198.142	605.257	1209.03	25.1471	673.998	1234.03	-17.1896	647.656	1297.93	49.6728	661.843	1346.88	124.444	752.805	859.099	487.002	472.39	883.154	526.781	470.406	905.34	444.436	376.84	924.337	461.714	286.821	885.442	437.429
208	2.07	725.619	1400.72	135.512	770.64	1366.24	69.5118	752.05	1376.37	216.608	806.285	1177.04	25.0542	780.063	1192.02	326.105	709.001	1157.26	152.828	617.26	1015.01	-198.285	605.208	1208.76	25.0776	673.837	1233.77	-17.2919	647.56	1297.63	49.5642	661.711	1346.69	124.31	752.818	859.065	486.938	472.393	883.1	526.788	470.41	905.322	444.44	376.856	924.298	461.732	286.866	885.434	437.446
209	2.08	725.468	1400.7	135.578	770.54	1366.24	69.522	752.03	1376.33	216.624	806.153	1176.99	24.9932	780.045	1192.01	326.074	708.999	1157.24	152.809	617.359	1014.59	-198.445	605.031	1208.47	24.9437	673.615	1233.47	-17.4544	647.336	1297.33	49.4154	661.487	1346.45	124.124	752.808	859.023	486.889	472.404	883.084	526.785	470.433	905.313	444.44	376.8	924.28	461.735	286.883	885.43	437.463
210	2.09	725.173	1400.76	135.67	770.396	1366.29	69.556	751.962	1376.31	216.637	806.011	1176.98	24.9236	779.977	1191.99	326.042	708.965	1157.2	152.772	617.437	1014.21	-198.543	604.669	1208.16	24.7747	673.255	1233.06	-17.6252	646.976	1297.01	49.2803	661.075	1346.18	123.911	752.813	859.004	486.859	472.422	883.083	526.783	470.422	905.297	444.441	376.775	924.261	461.757	286.856	885.417	437.462
211	2.1	724.983	1400.79	135.719	770.225	1366.33	69.5928	751.887	1376.28	216.654	805.87	1176.98	24.8728	779.923	1191.96	326	708.853	1157.15	152.73	617.521	1013.85	-198.564	604.255	1207.78	24.5579	672.824	1232.6	-17.8352	646.485	1296.6	49.0706	660.464	1345.82	123.685	752.79	858.979	486.803	472.408	883.114	526.76	470.408	905.263	444.413	376.802	924.286	461.765	286.828	885.42	437.451
212	2.11	724.928	1400.75	135.758	770.125	1366.33	69.593	751.829	1376.24	216.703	805.736	1176.99	24.8372	779.924	1191.92	325.972	708.805	1157.05	152.682	618.008	1013.13	-198.813	603.895	1207.2	24.1815	672.383	1232.09	-18.1041	645.996	1296.15	48.6938	659.499	1345.4	123.375	752.755	858.938	486.762	472.436	883.144	526.756	470.452	905.259	444.386	376.854	924.341	461.763	286.851	885.441	437.451
213	2.12	724.789	1400.67	135.759	770.049	1366.32	69.626	751.729	1376.18	216.761	805.575	1177	24.8015	779.916	1191.88	325.958	708.771	1156.99	152.643	618.767	1012.04	-199.221	603.4	1206.42	23.5071	671.941	1231.43	-18.3905	645.361	1295.59	48.1452	658.364	1344.91	122.829	752.74	858.892	486.736	472.444	883.135	526.752	470.446	905.241	444.347	376.869	924.348	461.7	286.843	885.442	437.431
214	2.13	724.54	1400.62	135.81	769.867	1366.31	69.7199	751.624	1376.1	216.843	805.393	1176.98	24.7554	779.925	1191.83	325.984	708.664	1156.99	152.631	619.555	1010.72	-199.647	602.504	1205.59	22.6274	671.455	1230.55	-18.7027	644.359	1294.87	47.4897	656.903	1344.27	122.259	752.722	858.827	486.723	472.398	883.128	526.739	470.374	905.236	444.335	376.824	924.335	461.663	286.812	885.432	437.422
215	2.14	724.336	1400.52	135.886	769.708	1366.34	69.7741	751.458	1376.01	216.962	805.209	1176.88	24.6685	779.974	1191.76	326.048	708.684	1156.99	152.697	620.366	1009.33	-200.068	601.351	1204.69	21.7554	670.875	1229.64	-19.0668	643.167	1293.97	46.8007	655.122	1343.45	121.634	752.711	858.724	486.725	472.439	883.148	526.744	470.4	905.265	444.378	376.796	924.349	461.663	286.827	885.45	437.446
216	2.15	724.247	1400.34	135.953	769.521	1366.37	69.8842	751.238	1375.91	217.135	804.995	1176.72	24.5553	780.067	1191.68	326.124	708.725	1156.97	152.792	621.638	1007.87	-200.606	600.143	1203.58	20.8544	669.995	1228.74	-19.5582	641.786	1293.03	46.0631	653.06	1342.54	120.876	752.718	858.624	486.722	472.418	883.119	526.754	470.455	905.317	444.422	376.778	924.357	461.699	286.853	885.461	437.472
217	2.16	723.845	1400.16	136.042	769.298	1366.37	70.032	751.006	1375.8	217.343	804.703	1176.56	24.3916	780.149	1191.59	326.215	708.687	1156.91	152.853	623.145	1006.17	-201.23	598.674	1202.09	19.5054	668.706	1227.6	-20.1288	639.975	1291.8	45.0917	650.288	1341.47	119.976	752.737	858.52	486.724	472.389	883.08	526.75	470.436	905.318	444.421	376.793	924.334	461.739	286.876	885.457	437.468
218	2.17	723.462	1400.01	136.133	769.015	1366.41	70.1934	750.704	1375.7	217.577	804.36	1176.36	24.2015	780.248	1191.48	326.306	708.519	1156.88	152.919	624.872	1004.15	-202.179	596.817	1200.44	17.9108	667.297	1225.99	-20.836	637.796	1290.3	43.962	646.849	1340.09	118.847	752.741	858.413	486.721	472.423	883.031	526.754	470.425	905.292	444.407	376.817	924.356	461.725	286.864	885.465	437.449
219	2.18	723.376	1399.78	136.319	768.707	1366.46	70.3939	750.34	1375.59	217.836	804.009	1176.11	24.0061	780.349	1191.38	326.425	708.353	1156.82	153.06	627.696	1001.74	-203.777	594.801	1198.44	16.1592	666.068	1224.23	-21.6755	635.208	1288.64	42.762	642.978	1338.62	117.499	752.741	858.288	486.706	472.448	883.018	526.76	470.444	905.254	444.401	376.845	924.379	461.719	286.839	885.458	437.452
220	2.19	723.248	1399.6	136.631	768.512	1366.49	70.5991	749.951	1375.47	218.139	803.687	1175.84	23.7919	780.471	1191.29	326.564	708.336	1156.71	153.207	630.395	999.354	-204.97	592.648	1196.3	13.9851	664.373	1222.4	-22.5931	632.287	1286.66	41.27	638.418	1336.87	116.025	752.753	858.161	486.701	472.436	882.997	526.77	470.456	905.231	444.403	376.867	924.37	461.757	286.856	885.455	437.469
221	2.2	723.088	1399.41	137.07	768.309	1366.57	70.8339	749.511	1375.35	218.494	803.358	1175.57	23.5245	780.572	1191.2	326.707	708.205	1156.57	153.349	632.967	996.548	-206.099	589.792	1193.89	11.4266	662.465	1220.32	-23.5058	629.122	1284.47	39.5802	633.383	1334.87	114.329	752.742	858.002	486.699	472.391	882.955	526.782	470.457	905.215	444.415	376.907	924.381	461.779	286.871	885.455	437.469
222	2.21	722.757	1399.26	137.714	767.905	1366.69	71.2392	749.203	1375.18	218.928	802.979	1175.26	23.226	780.637	1191.12	326.842	708.179	1156.46	153.493	636.219	993.843	-207.229	586.745	1191.2	8.6336	660.306	1217.82	-24.6507	625.585	1282.09	37.6721	627.777	1332.43	112.434	752.71	857.846	486.685	472.387	882.883	526.775	470.48	905.177	444.415	376.887	924.387	461.781	286.895	885.451	437.465
223	2.22	722.16	1399.24	138.512	767.539	1366.81	71.717	749.181	1374.99	219.475	802.611	1174.91	22.9099	780.73	1191.06	326.976	708.161	1156.36	153.669	639.632	990.828	-208.529	583.542	1188.32	5.44288	657.803	1214.92	-25.7329	621.656	1279.39	35.5346	621.927	1329.76	110.182	752.721	857.706	486.68	472.402	882.815	526.781	470.499	905.155	444.431	376.917	924.382	461.776	286.942	885.448	437.471
224	2.23	721.445	1399.36	139.252	767.173	1366.9	72.2967	749.258	1374.77	220.13	802.218	1174.5	22.486	780.834	1191.04	327.126	708.009	1156.32	153.864	643.28	987.686	-209.761	580.086	1185.31	1.73298	655.362	1211.25	-26.4566	617.821	1276.46	33.0308	615.463	1326.96	107.77	752.772	857.588	486.717	472.403	882.794	526.812	470.565	905.163	444.473	376.937	924.365	461.772	287.001	885.462	437.491
225	2.24	721.091	1399.42	139.868	766.774	1367.09	72.9251	749.413	1374.58	220.798	801.807	1174.11	21.9406	780.91	1191.02	327.254	707.839	1156.34	154.05	647.159	984.396	-211	576.522	1182.18	-2.44839	652.938	1207.74	-27.3588	613.716	1273.36	30.3311	608.572	1323.99	105.074	752.823	857.476	486.766	472.465	882.762	526.808	470.62	905.178	444.496	377.009	924.338	461.746	287.055	885.487	437.486
226	2.25	721.012	1399.45	140.594	766.339	1367.36	73.5638	749.516	1374.44	221.418	801.536	1173.78	21.3668	780.957	1191.01	327.343	708.015	1156.41	154.157	651.476	980.901	-212.395	572.648	1178.96	-7.207	650.611	1203.9	-28.2861	609.434	1269.98	27.5554	601.386	1320.66	101.923	752.847	857.37	486.792	472.52	882.756	526.815	470.66	905.162	444.49	377.053	924.342	461.738	287.114	885.505	437.469
227	2.26	720.849	1399.55	141.642	765.967	1367.69	74.1995	749.595	1374.29	222.113	801.331	1173.42	20.7382	781	1190.98	327.428	707.959	1156.43	154.294	655.951	977.295	-213.648	568.506	1175.72	-12.5932	648.541	1199.42	-28.9805	605.368	1266.25	24.6197	593.936	1316.83	98.484	752.89	857.304	486.825	472.607	882.755	526.82	470.731	905.134	444.478	377.137	924.381	461.739	287.141	885.503	437.451
228	2.27	720.753	1399.69	142.74	765.653	1368.02	74.8554	749.599	1374.04	222.918	801.138	1172.93	20.0388	781.003	1190.93	327.499	707.896	1156.42	154.415	660.656	973.604	-214.924	563.878	1172.76	-18.5907	646.397	1194.36	-29.5829	601.425	1262.11	21.5817	586.016	1312.67	94.9036	752.948	857.264	486.895	472.644	882.732	526.824	470.753	905.104	444.467	377.173	924.416	461.682	287.142	885.489	437.416
229	2.28	721.007	1399.68	143.595	765.396	1368.36	75.4999	749.534	1373.76	223.757	800.918	1172.41	19.3349	780.992	1190.9	327.546	707.834	1156.38	154.503	665.69	969.774	-216.241	558.645	1169.97	-25.2138	644.17	1188.97	-30.245	596.951	1257.45	18.6356	577.804	1308.05	90.9812	752.985	857.251	486.961	472.646	882.722	526.839	470.736	905.075	444.46	377.176	924.429	461.667	287.116	885.487	437.389
230	2.29	720.736	1399.8	144.468	764.991	1368.71	76.2073	749.576	1373.53	224.562	800.726	1171.95	18.7129	780.964	1190.89	327.583	707.861	1156.28	154.604	670.846	965.919	-217.477	554.94	1166.04	-31.8342	641.144	1183.29	-30.455	592.167	1252.22	15.6712	569.078	1302.7	86.7842	753.024	857.268	487.023	472.67	882.727	526.846	470.767	905.053	444.468	377.117	924.456	461.686	287.126	885.485	437.362
231	2.3	720.265	1400.05	145.665	764.427	1369.09	76.9944	749.841	1373.29	225.339	800.688	1171.64	18.0893	780.936	1190.88	327.629	707.844	1156.22	154.718	676.098	961.925	-218.653	551.694	1161.41	-38.4178	636.91	1177.24	-30.3871	587.121	1246.51	12.6734	559.767	1296.79	82.4144	753.036	857.298	487.11	472.612	882.709	526.872	470.772	905.043	444.497	377.085	924.456	461.71	287.15	885.472	437.362
232	2.31	720.394	1400.17	146.842	763.983	1369.5	77.7267	750.177	1373	226.16	800.69	1171.23	17.2629	780.922	1190.89	327.677	707.77	1156.18	154.812	681.673	958.125	-219.927	548.649	1156.23	-45.0224	632.834	1170.77	-30.9046	581.28	1240.19	9.76912	550.053	1290.19	77.8738	753.088	857.376	487.228	472.543	882.697	526.895	470.766	905.055	444.532	377.12	924.412	461.73	287.185	885.458	437.38
233	2.32	721.027	1400.08	147.757	763.621	1369.88	78.4247	750.518	1372.69	226.974	800.492	1170.6	16.5885	780.906	1190.91	327.682	707.672	1156.18	154.88	687.498	954.023	-220.835	545.464	1150.59	-51.7083	628.228	1163.77	-31.6044	575.062	1233.5	6.62532	539.935	1282.87	73.1193	753.144	857.476	487.35	472.498	882.7	526.904	470.732	905.068	444.561	377.096	924.381	461.734	287.179	885.456	437.391
234	2.33	720.699	1400.23	148.855	763.328	1370.26	79.0864	750.868	1372.37	227.719	800.722	1170.56	16.114	780.858	1190.94	327.66	707.551	1156.2	154.924	693.542	950.198	-221.405	542.385	1144.45	-58.4287	623.535	1156.69	-32.9141	568.669	1226.29	3.28529	529.459	1274.85	68.0713	753.138	857.578	487.45	472.485	882.726	526.905	470.713	905.117	444.583	377.086	924.38	461.719	287.185	885.472	437.394
235	2.34	719.891	1400.65	150.029	763.068	1370.67	79.7834	751.313	1372.12	228.463	800.769	1170.38	15.4145	780.815	1191	327.621	707.578	1156.19	154.883	699.569	946.615	-221.913	539.371	1138.02	-65.2675	618.504	1149.23	-34.3208	561.943	1218.53	-0.05714	518.667	1266.16	62.939	753.154	857.707	487.577	472.442	882.766	526.929	470.712	905.128	444.587	377.086	924.399	461.725	287.157	885.476	437.394
236	2.35	720.124	1400.83	150.957	762.874	1371.1	80.4545	751.816	1371.89	229.225	800.87	1170.21	14.7698	780.774	1191.05	327.565	707.527	1156.2	154.819	705.908	943.06	-222.562	536.341	1131.48	-72.2809	613.06	1141.36	-35.5657	555.058	1210.13	-3.39734	507.693	1256.83	57.4805	753.208	857.901	487.736	472.435	882.819	526.956	470.704	905.133	444.593	377.107	924.406	461.716	287.147	885.472	437.377
237	2.36	720.862	1400.77	151.756	762.653	1371.53	81.0833	752.217	1371.65	229.905	801.017	1170.03	14.2347	780.682	1191.09	327.476	707.546	1156.11	154.732	712.207	939.859	-222.987	533.608	1124.69	-79.5007	607.456	1133.04	-37.2444	547.988	1201.28	-6.78183	496.635	1246.91	51.7958	753.234	858.092	487.84	472.448	882.864	526.947	470.693	905.14	444.598	377.108	924.414	461.708	287.131	885.465	437.367
238	2.37	721.206	1400.84	152.778	762.502	1371.88	81.651	752.575	1371.36	230.534	801.148	1169.83	13.7294	780.591	1191.13	327.382	707.442	1156.06	154.649	718.133	936.699	-223.161	530.862	1118.2	-87.0809	601.452	1124.31	-39.2253	540.656	1191.93	-10.2213	485.649	1236.32	45.7333	753.225	858.278	487.923	472.412	882.916	526.938	470.679	905.139	444.581	377.094	924.404	461.689	287.119	885.453	437.369
239	2.38	720.794	1401.17	153.872	762.46	1372.23	82.1462	752.868	1371.09	231.134	801.339	1169.64	13.2175	780.488	1191.18	327.303	707.362	1156.04	154.508	724.029	933.834	-223.148	527.961	1111.95	-94.8942	595.088	1114.82	-41.2249	533.177	1181.86	-13.835	474.763	1225.04	39.2117	753.193	858.436	487.996	472.402	882.942	526.954	470.689	905.134	444.575	377.033	924.407	461.692	287.11	885.443	437.374
240	2.39	720.814	1401.38	154.6	762.361	1372.62	82.6423	753.232	1370.83	231.697	801.655	1169.44	12.7094	780.404	1191.25	327.214	707.454	1155.99	154.321	729.743	930.956	-223.121	525.878	1104.97	-102.299	605	1111.02	-54.5159	525.69	1171.46	-18.0275	463.848	1213.13	32.2595	753.203	858.592	488.055	472.392	882.99	526.956	470.689	905.174	444.592	377.016	924.391	461.682	287.092	885.439	437.359
241	2.4	721.203	1401.42	155.171	762.227	1372.99	83.0924	753.629	1370.56	232.189	801.764	1169.28	12.5028	780.324	1191.31	327.113	707.53	1155.99	154.136	735.404	928.325	-222.856	523.871	1097.68	-109.392	633.45	1116.43	-78.2849	518.029	1160.62	-22.7353	452.685	1200.55	24.8458	753.222	858.739	488.069	472.376	883.02	526.935	470.697	905.205	444.59	377.022	924.373	461.674	287.062	885.427	437.327
242	2.41	721.637	1401.47	155.864	762.085	1373.3	83.4885	754.116	1370.29	232.689	801.724	1169.07	12.5597	780.203	1191.36	326.998	707.433	1156.08	153.907	740.874	925.848	-222.655	522.112	1089.98	-116.291				510.013	1149.14	-27.0592	441.671	1187.3	16.9977	753.158	858.836	488.036	472.375	883.046	526.925	470.648	905.211	444.577	376.978	924.377	461.649	287.018	885.424	437.308
243	2.42	721.824	1401.61	156.689	761.953	1373.56	83.8265	754.655	1370.06	233.132	802.342	1168.85	11.785	780.093	1191.41	326.892	707.418	1156.08	153.692	746.034	923.427	-222.502	520.373	1081.79	-122.935				501.994	1137.43	-31.9786	431.388	1173.84	8.77286	753.092	858.939	488.003	472.382	883.075	526.935	470.61	905.225	444.565	376.968	924.352	461.643	286.99	885.429	437.308
244	2.43	721.968	1401.73	157.435	761.845	1373.79	84.1037	755.182	1369.88	233.48	802.773	1168.76	10.9893	780.025	1191.47	326.767	707.35	1156.07	153.514	751.222	921.305	-222.19	518.609	1073.19	-129.382				493.825	1125.6	-37.9519	420.893	1159.66	-0.15101	753.089	859.05	487.959	472.361	883.086	526.941	470.589	905.257	444.566	376.939	924.323	461.635	286.971	885.426	437.299
245	2.44	721.911	1401.87	158.003	761.714	1373.98	84.3685	755.642	1369.72	233.734	803.004	1168.65	10.4657	779.947	1191.54	326.602	707.32	1156.01	153.302	756.071	919.262	-221.793	516.815	1064.27	-135.848				485.277	1113.66	-44.8048	410.694	1144.98	-9.80449	753.087	859.168	487.901	472.337	883.106	526.918	470.564	905.256	444.552	376.92	924.314	461.651	286.943	885.419	437.289
246	2.45	721.935	1401.95	158.383	761.646	1374.14	84.5571	756.082	1369.57	233.909	803.178	1168.55	9.99011	779.85	1191.61	326.423	707.298	1155.96	153.097	760.738	917.415	-221.464	515.064	1055.09	-142.332				478.169	1101.23	-51.1024	401.159	1129.99	-19.8146	753.027	859.265	487.82	472.319	883.112	526.897	470.527	905.244	444.546	376.908	924.31	461.651	286.901	885.407	437.29
247	2.46	722.295	1401.92	158.639	761.627	1374.28	84.6795	756.57	1369.43	234.038	803.368	1168.47	9.54311	779.744	1191.68	326.216	707.313	1155.83	152.885	765.007	915.651	-220.946	513.265	1045.64	-148.746				472.589	1088.93	-57.4282	392.204	1114.86	-29.9627	752.995	859.363	487.733	472.361	883.115	526.889	470.501	905.226	444.513	376.879	924.28	461.674	286.89	885.388	437.298
248	2.47	722.714	1401.92	158.824	761.616	1374.43	84.7551	757.064	1369.32	234.139	803.52	1168.4	9.17097	779.646	1191.76	326.01	707.254	1155.76	152.653	769.313	914.204	-220.484	511.536	1036.16	-155.267	549.735	1025.28	-79.8886	466.454	1076.72	-64.5821	384.002	1099.5	-40.3329	753.026	859.465	487.664	472.362	883.138	526.863	470.488	905.22	444.487	376.849	924.275	461.665	286.885	885.375	437.287
249	2.48	722.995	1402.01	158.937	761.543	1374.58	84.7642	757.518	1369.25	234.17	803.597	1168.36	8.84275	779.522	1191.87	325.781	707.28	1155.75	152.391	772.787	912.795	-220.124	510.187	1026.74	-161.888	547.222	1020.88	-82.0349	460.616	1064.76	-72.0693	376.627	1084.3	-50.7229	753.027	859.577	487.604	472.333	883.171	526.84	470.481	905.255	444.479	376.801	924.287	461.647	286.847	885.38	437.269
250	2.49	723.463	1402.03	159.014	761.485	1374.71	84.6944	757.911	1369.2	234.122	803.635	1168.31	8.51865	779.396	1191.97	325.528	707.422	1155.76	152.078	775.832	911.461	-219.837	509.17	1017.74	-168.294				455.425	1052.8	-79.657	370.067	1069.23	-61.1268	752.984	859.687	487.528	472.322	883.22	526.828	470.463	905.294	444.463	376.813	924.283	461.639	286.82	885.395	437.259
251	2.5	723.792	1402.1	159.045	761.464	1374.81	84.5706	758.348	1369.14	234.006	803.609	1168.23	8.16097	779.322	1192.07	325.238	707.517	1155.77	151.783	779.704	910.41	-219.046	508.318	1009.31	-174.407	536.013	997.447	-94.4666	450.635	1041.07	-87.2428	364.446	1054.22	-71.5426	752.995	859.849	487.452	472.427	883.285	526.818	470.456	905.327	444.441	376.818	924.301	461.6	286.795	885.403	437.243
252	2.51	723.892	1402.25	159.033	761.407	1374.93	84.4549	758.801	1369.08	233.826	803.548	1168.12	7.74875	779.259	1192.18	324.925	707.626	1155.74	151.475	782.945	909.209	-218.578	508.11	1000.95	-180.176	534.28	991.117	-98.0355	446.655	1029.48	-94.5224	359.533	1039.63	-81.6849	753.022	860.046	487.356	472.51	883.344	526.805	470.423	905.358	444.424	376.797	924.333	461.601	286.788	885.406	437.23
253	2.52	723.946	1402.39	159.005	761.435	1375.01	84.2528	759.233	1369.05	233.611	803.435	1167.97	7.27254	779.155	1192.29	324.591	707.719	1155.72	151.172	785.731	908.076	-218.201	508.76	992.356	-185.365	532.253	983.572	-102.273	443.572	1017.77	-101.286	355.479	1025.63	-91.7007	753.035	860.269	487.27	472.565	883.384	526.782	470.404	905.359	444.396	376.807	924.315	461.632	286.788	885.407	437.234
254	2.53	724.099	1402.46	158.97	761.462	1375.02	84.0046	759.601	1369.02	233.352	803.296	1167.8	6.79411	779.047	1192.42	324.227	707.852	1155.67	150.844	788.293	906.767	-217.997	509.07	984.475	-190.399	530.209	975.797	-106.512	440.731	1006.75	-108.028	352.307	1012.22	-101.555	753.007	860.522	487.163	472.599	883.434	526.773	470.39	905.362	444.372	376.78	924.299	461.624	286.79	885.393	437.252
255	2.54	724.167	1402.48	158.896	761.527	1375.02	83.6867	759.933	1368.98	233.073	803.134	1167.62	6.30185	778.945	1192.57	323.862	708.012	1155.58	150.468	790.477	905.488	-217.722	509.579	976.932	-195.372	528.761	968.453	-110.823	438.413	996.421	-114.718	349.943	999.211	-111.029	753.019	860.819	487.033	472.593	883.482	526.759	470.394	905.368	444.357	376.77	924.289	461.624	286.789	885.377	437.266
256	2.55	724.059	1402.55	158.763	761.573	1375.01	83.2863	760.241	1368.95	232.741	802.967	1167.45	5.79816	778.867	1192.75	323.451	708.147	1155.5	150.08	792.552	904.266	-217.27	510.225	969.52	-199.961	527.804	962.781	-114.441	436.709	986.912	-121.114	348.104	986.982	-120.09	753.068	861.126	486.925	472.589	883.484	526.739	470.347	905.366	444.313	376.703	924.246	461.615	286.771	885.365	437.265
257	2.56	723.822	1402.65	158.527	761.485	1375.01	82.8621	760.473	1368.93	232.362	802.722	1167.31	5.29144	778.783	1192.97	323.02	708.21	1155.46	149.683	794.422	903.152	-216.921	510.938	962.446	-204.292	527.211	956.969	-118.309	435.337	978.064	-127.215	346.896	975.557	-128.437	753.078	861.467	486.867	472.606	883.521	526.717	470.316	905.386	444.29	376.661	924.196	461.58	286.758	885.352	437.261
258	2.57	723.726	1402.77	158.207	761.31	1375.04	82.4087	760.667	1368.96	231.923	802.508	1167.18	4.82906	778.672	1193.2	322.588	708.169	1155.46	149.296	796.557	902.059	-216.737	511.791	955.662	-208.405	526.962	951.463	-122.124	434.455	970.087	-132.948	346.14	965.142	-135.798	753.104	861.871	486.791	472.619	883.572	526.711	470.284	905.427	444.305	376.597	924.212	461.604	286.734	885.343	437.268
259	2.58	724.057	1402.75	157.654	761.109	1375.11	81.8913	760.867	1369.04	231.398	802.388	1167.05	4.35025	778.602	1193.44	322.16	707.924	1155.51	148.904	798.659	901.037	-216.704	512.86	949.181	-212.183	526.62	946.46	-125.697	434.04	962.756	-138.224	345.831	955.766	-142.337	753.145	862.291	486.675	472.66	883.653	526.7	470.278	905.478	444.285	376.616	924.216	461.621	286.729	885.333	437.271
260	2.59	724.565	1402.69	157.012	760.89	1375.12	81.2937	761.055	1369.09	230.779	802.308	1166.94	3.82173	778.554	1193.69	321.679	707.562	1155.56	148.445	800.522	900.058	-216.487	513.924	943.452	-215.606	526.436	941.852	-128.877	433.831	956.034	-142.956	345.862	947.195	-148.239	753.196	862.669	486.542	472.779	883.747	526.674	470.277	905.521	444.24	376.684	924.194	461.649	286.708	885.333	437.256
261	2.6	725.075	1402.6	156.266	760.766	1375.04	80.5389	761.245	1369.16	230.095	802.177	1166.81	3.28014	778.491	1193.93	321.198	707.274	1155.57	147.96	802.133	898.975	-216.115	515.115	938.393	-218.614	526.408	937.539	-131.535	433.951	949.921	-147.123	346.107	939.466	-153.498	753.226	863.053	486.386	472.858	883.822	526.661	470.262	905.565	444.21	376.684	924.197	461.654	286.679	885.338	437.24
262	2.61	725.434	1402.5	155.528	760.685	1374.92	79.7853	761.388	1369.28	229.355	802.046	1166.67	2.78111	778.333	1194.15	320.728	707.021	1155.6	147.487	803.452	898.002	-215.604	516.442	934.06	-221.283	527.29	933.071	-134.307	434.168	944.316	-150.682	346.763	932.632	-158.228	753.255	863.434	486.205	472.919	883.863	526.635	470.223	905.645	444.191	376.624	924.196	461.644	286.655	885.34	437.222
263	2.62	724.812	1402.69	155.035	760.625	1374.8	79.0577	761.538	1369.44	228.597	801.973	1166.54	2.30008	778.131	1194.35	320.294	706.792	1155.64	147.056	804.687	896.989	-214.968	517.651	930.341	-223.466	529.634	928.199	-137.589	434.568	939.272	-153.777	347.416	926.741	-162.45	753.302	863.788	485.991	472.985	883.93	526.605	470.164	905.725	444.159	376.599	924.159	461.636	286.65	885.343	437.221
264	2.63	724.155	1402.86	154.405	760.399	1374.73	78.3539	761.6	1369.59	227.846	801.896	1166.45	1.85508	777.911	1194.53	319.88	706.606	1155.65	146.663	805.963	895.882	-214.531	518.87	926.95	-225.359	530.688	924.479	-139.637	435.157	934.759	-156.624	348.256	921.552	-166.338	753.351	864.104	485.788	472.974	883.993	526.577	470.122	905.763	444.112	376.531	924.126	461.615	286.624	885.337	437.205
265	2.64	724.032	1402.83	153.49	760.004	1374.6	77.6712	761.548	1369.67	227.153	801.868	1166.34	1.42837	777.659	1194.71	319.482	706.448	1155.69	146.309	807.133	895.059	-214.145	520.259	923.557	-227.074	531.52	921.301	-141.279	435.684	930.827	-159.056	348.984	917.038	-169.653	753.367	864.446	485.612	472.93	884.052	526.559	470.033	905.806	444.061	376.473	924.115	461.601	286.567	885.323	437.186
266	2.65	724.388	1402.63	152.594	759.784	1374.45	76.8147	761.466	1369.68	226.379	801.868	1166.21	0.99721	777.455	1194.88	319.07	706.412	1155.67	145.923	808.377	894.221	-213.836	521.5	920.208	-228.475	531.972	918.79	-142.503	436.153	927.379	-161.217	349.973	913.007	-172.587	753.38	864.787	485.425	472.947	884.098	526.515	469.97	905.874	444.032	376.453	924.11	461.625	286.529	885.312	437.181
267	2.66	724.662	1402.44	151.837	759.624	1374.33	75.9597	761.333	1369.7	225.548	801.869	1166.05	0.55708	777.294	1195.06	318.633	706.471	1155.61	145.484	809.492	893.426	-213.615	522.466	917.047	-229.647	532.822	916.379	-143.832	436.859	924.25	-163.188	350.82	909.243	-175.039	753.425	865.17	485.203	473.006	884.148	526.504	469.9	905.928	443.989	376.429	924.117	461.637	286.492	885.308	437.185
268	2.67	724.165	1402.47	151.345	759.425	1374.19	75.2756	761.246	1369.76	224.777	801.818	1165.87	0.14371	777.153	1195.24	318.225	706.618	1155.53	145.021	810.344	892.863	-213.478	523.188	914.035	-230.677	533.225	914.299	-144.816	437.581	921.342	-164.879	351.352	905.801	-176.894	753.412	865.549	484.998	473.019	884.195	526.494	469.824	905.995	443.96	376.431	924.13	461.7	286.44	885.296	437.195
269	2.68	723.527	1402.52	150.892	759.14	1374.01	74.6703	761.245	1369.83	224.096	801.769	1165.67	-0.23099	777.045	1195.41	317.87	706.683	1155.49	144.623	811.078	892.458	-213.367	523.945	911.093	-231.515	533.161	912.602	-145.457	438.031	918.689	-166.082	351.879	902.579	-178.261	753.401	865.907	484.855	473.042	884.228	526.476	469.743	906.071	443.947	376.402	924.094	461.697	286.412	885.299	437.212
270	2.69	723.306	1402.44	150.147	758.802	1373.83	74.0734	761.266	1369.93	223.542	801.759	1165.47	-0.54698	777.008	1195.55	317.527	706.688	1155.44	144.186	811.844	892.1	-213.374	524.664	908.361	-232.125	533.37	910.8	-146.099	438.543	916.041	-167.11	352.303	899.476	-179.182	753.403	866.253	484.737	473.06	884.266	526.465	469.711	906.128	443.912	376.355	924.087	461.711	286.394	885.308	437.221
271	2.7	723.075	1402.31	149.344	758.434	1373.63	73.5048	761.25	1370.02	223.039	801.74	1165.31	-0.81594	776.991	1195.68	317.172	706.713	1155.38	143.724	812.458	891.702	-213.485	525.152	905.841	-232.628	533.899	908.538	-146.749	438.921	913.388	-167.807	352.741	896.574	-179.587	753.354	866.521	484.592	473.052	884.309	526.433	469.657	906.188	443.864	376.331	924.07	461.7	286.372	885.314	437.203
272	2.71	723.178	1402.09	148.642	758.081	1373.43	72.9052	761.139	1370.08	222.46	801.708	1165.17	-1.04861	776.98	1195.8	316.842	706.67	1155.34	143.366	812.867	891.266	-213.578	525.579	903.521	-233.055	534.409	906.297	-147.314	439.287	910.9	-168.048	353.184	894.259	-179.215	753.263	866.711	484.447	473.053	884.329	526.393	469.535	906.221	443.803	376.264	924.046	461.691	286.34	885.302	437.18
273	2.72	723.368	1401.84	148.066	757.781	1373.26	72.3697	760.998	1370.13	221.843	801.638	1165.04	-1.29133	777.029	1195.88	316.533	706.721	1155.27	143.073	813.333	890.821	-213.665	525.869	901.51	-233.187	534.741	903.892	-147.554	439.945	908.729	-167.828	353.693	892.518	-178.394	753.235	866.865	484.342	473.038	884.35	526.353	469.512	906.224	443.751	376.237	924.032	461.669	286.306	885.284	437.159
274	2.73	723.235	1401.7	147.702	757.482	1373.07	71.9474	760.918	1370.16	221.329	801.563	1164.92	-1.52594	777.143	1195.93	316.236	706.8	1155.22	142.852	813.774	890.397	-213.661	526.118	900.101	-233.038	535.327	901.775	-147.428	440.527	907.557	-167.348	353.986	891.521	-177.644	753.261	867	484.282	473.064	884.359	526.337	469.509	906.228	443.716	376.234	924.035	461.681	286.316	885.278	437.143
275	2.74	722.825	1401.67	147.458	757.278	1372.89	71.4985	760.878	1370.15	220.888	801.473	1164.83	-1.77654	777.233	1195.98	315.986	706.87	1155.17	142.662	814.009	889.985	-213.602	526.334	899.458	-232.729	535.822	900.456	-147.073	440.898	907.392	-167.08	354.11	891.43	-177.517	753.196	867.063	484.183	473.087	884.346	526.294	469.471	906.222	443.653	376.225	924.035	461.654	286.29	885.266	437.111
276	2.75	722.311	1401.66	147.265	757.118	1372.74	71.0878	760.831	1370.12	220.541	801.322	1164.74	-2.02347	777.314	1196.03	315.765	706.895	1155.13	142.47	814.087	889.411	-213.453	526.512	899.426	-232.534	535.939	900.512	-146.767	441.044	907.826	-167.19	354.178	891.959	-177.902	753.148	867.122	484.081	473.088	884.367	526.24	469.449	906.214	443.587	376.247	924.039	461.623	286.285	885.278	437.084
277	2.76	721.841	1401.59	147.15	756.917	1372.59	70.7883	760.861	1370.08	220.286	801.221	1164.7	-2.21131	777.407	1196.06	315.579	706.951	1155.05	142.302	814.005	888.682	-213.158	526.677	899.536	-232.501	535.704	901.375	-146.638	440.959	908.345	-167.503	354.076	892.572	-178.388	753.19	867.198	484.004	473.13	884.415	526.249	469.494	906.247	443.561	376.274	924.072	461.608	286.321	885.302	437.089
278	2.77	721.461	1401.48	147.035	756.573	1372.47	70.6449	760.914	1370.04	220.1	801.164	1164.72	-2.35211	777.486	1196.08	315.439	706.987	1155.06	142.195	813.835	887.984	-212.795	526.775	899.32	-232.519	535.376	902.124	-146.65	440.717	908.712	-167.863	353.821	892.972	-178.909	753.221	867.246	483.932	473.176	884.431	526.271	469.528	906.287	443.574	376.301	924.115	461.618	286.381	885.327	437.135
279	2.78	721.202	1401.33	146.941	756.145	1372.4	70.5392	760.94	1370	219.971	801.094	1164.73	-2.46846	777.545	1196.1	315.324	707.019	1155.02	142.111	813.608	887.438	-212.508	526.669	898.728	-232.507	535.084	902.503	-146.705	440.429	908.841	-168.184	353.567	893.183	-179.293	753.202	867.271	483.864	473.224	884.43	526.264	469.553	906.265	443.605	376.294	924.076	461.654	286.414	885.342	437.175
280	2.79	720.97	1401.14	146.882	755.736	1372.34	70.4724	760.966	1369.95	219.849	801.043	1164.78	-2.56637	777.62	1196.08	315.224	707.169	1154.91	142.041	813.359	887.073	-212.344	526.421	898.037	-232.456	534.836	902.529	-146.725	440.213	908.72	-168.315	353.329	893.158	-179.427	753.166	867.267	483.796	473.206	884.426	526.255	469.552	906.232	443.62	376.34	924.024	461.667	286.423	885.331	437.189
281	2.8	720.768	1400.97	146.848	755.386	1372.29	70.4296	760.964	1369.88	219.732	801.014	1164.85	-2.63093	777.74	1196.05	315.166	707.274	1154.79	142.007	813.096	886.847	-212.215	526.153	897.561	-232.348	534.446	902.443	-146.592	440.072	908.464	-168.214	353.155	892.916	-179.334	753.159	867.267	483.757	473.187	884.414	526.26	469.528	906.242	443.617	376.301	923.997	461.649	286.416	885.327	437.182
282	2.81	720.506	1400.9	146.852	755.129	1372.22	70.3783	760.985	1369.81	219.64	800.961	1164.92	-2.6627	777.871	1196.01	315.148	707.276	1154.78	142.01	812.838	886.69	-212.115	525.932	897.356	-232.163	533.967	902.311	-146.261	439.969	908.153	-167.965	353.016	892.578	-179.141	753.133	867.256	483.742	473.185	884.425	526.277	469.484	906.238	443.608	376.209	924.028	461.67	286.376	885.314	437.176
283	2.82	720.247	1400.83	146.933	754.861	1372.14	70.3402	761.01	1369.87	219.645	800.89	1165	-2.67967	778.001	1195.96	315.165	707.309	1154.81	142.046	812.74	886.654	-212.115	525.724	897.289	-231.948	533.788	902.038	-145.91	439.778	907.933	-167.643	352.95	892.313	-178.995	753.118	867.233	483.724	473.168	884.414	526.27	469.414	906.26	443.618	376.217	924.058	461.715	286.336	885.309	437.18
284	2.83	720.025	1400.74	147.005	754.613	1372.03	70.3015	761.095	1370.05	219.733	800.876	1165.08	-2.68467	778.162	1195.89	315.193	707.452	1154.77	142.085	812.644	886.666	-212.155	525.644	897.219	-231.766	533.641	901.855	-145.6	439.643	907.815	-167.386	352.918	892.168	-178.965	753.104	867.149	483.718	473.174	884.402	526.253	469.391	906.267	443.581	376.227	924.046	461.69	286.331	885.299	437.143
285	2.84	720.064	1400.6	147.038	754.387	1371.93	70.3054	761.198	1370.1	219.753	800.896	1165.14	-2.63514	778.334	1195.8	315.253	707.562	1154.78	142.159	812.602	886.716	-212.225	525.622	897.153	-231.627	533.536	901.78	-145.366	439.587	907.783	-167.291	352.878	892.121	-178.988	753.119	867.045	483.714	473.18	884.377	526.237	469.446	906.23	443.526	376.275	924.024	461.65	286.369	885.282	437.104
286	2.85	720.03	1400.48	147.148	754.209	1371.87	70.3699	761.302	1370.12	219.791	800.9	1165.21	-2.54053	778.497	1195.74	315.335	707.619	1154.86	142.306	812.548	886.784	-212.294	525.624	897.033	-231.535	533.503	901.764	-145.254	439.525	907.789	-167.275	352.808	892.126	-179.037	753.17	866.933	483.714	473.231	884.357	526.238	469.531	906.174	443.528	376.343	924.072	461.663	286.449	885.301	437.124
287	2.86	720.217	1400.31	147.241	754.07	1371.78	70.3938	761.445	1370.1	219.838	800.915	1165.26	-2.44782	778.689	1195.65	315.43	707.57	1155.01	142.47	812.535	886.828	-212.386	525.613	896.832	-231.477	533.457	901.809	-145.224	439.482	907.846	-167.324	352.744	892.151	-179.105	753.183	866.77	483.698	473.297	884.348	526.239	469.613	906.162	443.562	376.4	924.106	461.64	286.508	885.342	437.133
288	2.87	720.405	1400.13	147.316	753.952	1371.68	70.4582	761.585	1370.07	219.905	800.946	1165.29	-2.36144	778.842	1195.54	315.532	707.616	1155.1	142.646	812.561	886.946	-212.455	525.667	896.518	-231.5	533.44	901.844	-145.286	439.567	907.927	-167.518	352.699	892.233	-179.224	753.202	866.594	483.695	473.322	884.354	526.242	469.713	906.144	443.592	376.439	924.112	461.641	286.561	885.371	437.135
289	2.88	720.686	1399.95	147.406	753.837	1371.59	70.5412	761.743	1369.95	219.949	801.003	1165.27	-2.26318	778.995	1195.42	315.641	707.621	1155.15	142.802	812.67	887.078	-212.52	525.828	896.143	-231.598	533.5	901.826	-145.412	439.72	908.008	-167.699	352.691	892.349	-179.378	753.196	866.434	483.712	473.312	884.334	526.256	469.769	906.124	443.617	376.489	924.122	461.652	286.577	885.377	437.154
290	2.89	721.001	1399.77	147.539	753.73	1371.52	70.6831	761.954	1369.82	219.997	801.06	1165.25	-2.16219	779.144	1195.32	315.742	707.663	1155.15	142.983	812.783	887.214	-212.57	525.952	895.813	-231.66	533.613	901.747	-145.506	439.849	908.09	-167.836	352.68	892.445	-179.459	753.195	866.277	483.752	473.305	884.304	526.295	469.789	906.145	443.661	376.53	924.156	461.731	286.607	885.37	437.206
291	2.9	721.327	1399.62	147.736	753.655	1371.48	70.8671	762.08	1369.87	220.217	801.131	1165.25	-2.07281	779.293	1195.22	315.845	707.771	1155.11	143.186	812.873	887.376	-212.603	526.075	895.562	-231.7	533.667	901.686	-145.539	439.964	908.155	-167.935	352.709	892.537	-179.521	753.179	866.16	483.789	473.309	884.277	526.324	469.741	906.182	443.711	376.497	924.223	461.813	286.606	885.37	437.247
292	2.91	721.633	1399.5	148	753.648	1371.47	71.0221	762.363	1369.84	220.41	801.225	1165.27	-1.97952	779.443	1195.13	315.959	707.844	1155.09	143.41	812.938	887.517	-212.581	526.231	895.392	-231.749	533.839	901.54	-145.576	440.112	908.206	-167.981	352.791	892.619	-179.578	753.181	866.114	483.827	473.304	884.264	526.346	469.736	906.246	443.769	376.516	924.208	461.865	286.614	885.369	437.291
293	2.92	721.601	1399.51	148.314	753.672	1371.46	71.1994	762.656	1369.79	220.598	801.296	1165.3	-1.87473	779.55	1195.06	316.049	707.953	1155.1	143.594	813.057	887.619	-212.545	526.37	895.267	-231.769	534.099	901.319	-145.628	440.27	908.208	-168.007	352.913	892.666	-179.573	753.199	866.141	483.871	473.294	884.25	526.369	469.692	906.37	443.822	376.501	924.257	461.906	286.606	885.379	437.341
294	2.93	721.336	1399.59	148.688	753.662	1371.47	71.4088	762.988	1369.74	220.788	801.379	1165.34	-1.7703	779.711	1195.02	316.103	708.095	1155.13	143.795	813.213	887.731	-212.526	526.511	895.177	-231.793	534.262	901.173	-145.629	440.429	908.212	-168.03	353.013	892.682	-179.541	753.241	866.239	483.944	473.289	884.226	526.385	469.691	906.487	443.864	376.522	924.308	461.957	286.605	885.402	437.374
295	2.94	720.994	1399.71	149.032	753.635	1371.5	71.6051	763.338	1369.69	220.979	801.448	1165.4	-1.65414	779.897	1195.02	316.14	708.187	1155.19	143.997	813.334	887.816	-212.472	526.675	895.103	-231.825	534.369	901.111	-145.651	440.544	908.231	-168.047	353.143	892.726	-179.541	753.268	866.379	484.027	473.317	884.213	526.389	469.712	906.616	443.911	376.579	924.326	462.045	286.668	885.428	437.429
296	2.95	720.845	1399.85	149.37	753.784	1371.53	71.7761	763.714	1369.65	221.16	801.489	1165.47	-1.51807	780.06	1195.05	316.193	708.101	1155.32	144.237	813.475	887.856	-212.356	526.756	895.05	-231.809	534.588	901.01	-145.733	440.615	908.281	-168.048	353.227	892.812	-179.536	753.344	866.624	484.148	473.31	884.228	526.396	469.779	906.813	443.987	376.64	924.395	462.109	286.721	885.458	437.492
297	2.96	720.968	1399.92	149.672	753.93	1371.55	71.9836	764.055	1369.63	221.318	801.503	1165.55	-1.38476	780.229	1195.1	316.24	708.005	1155.45	144.391	813.593	887.87	-212.197	526.816	894.982	-231.785	534.76	900.939	-145.841	440.632	908.343	-168.056	353.243	892.888	-179.554	753.427	866.939	484.314	473.288	884.215	526.439	469.799	906.997	444.07	376.722	924.448	462.174	286.765	885.493	437.565
298	2.97	721.011	1400.05	150.039	754.014	1371.63	72.1731	764.399	1369.61	221.484	801.494	1165.59	-1.25532	780.43	1195.16	316.259	708.025	1155.54	144.511	813.625	887.861	-212.044	526.88	894.902	-231.784	534.729	900.953	-145.854	440.683	908.376	-168.097	353.262	892.96	-179.631	753.514	867.319	484.523	473.257	884.243	526.498	469.784	907.213	444.159	376.744	924.48	462.297	286.822	885.545	437.659
299	2.98	721.134	1400.2	150.448	754.035	1371.7	72.4138	764.794	1369.62	221.651	801.478	1165.6	-1.11697	780.623	1195.23	316.264	708.004	1155.64	144.668	813.583	887.889	-211.87	526.929	894.835	-231.756	534.546	901.032	-145.744	440.679	908.422	-168.117	353.276	893.008	-179.683	753.602	867.756	484.776	473.222	884.273	526.57	469.727	907.458	444.278	376.7	924.573	462.445	286.881	885.595	437.787
300	2.99	721.328	1400.3	150.78	754.032	1371.76	72.661	765.159	1369.62	221.804	801.5	1165.61	-0.9804	780.816	1195.29	316.253	707.926	1155.75	144.827	813.574	887.918	-211.7	526.93	894.775	-231.708	534.443	901.094	-145.639	440.67	908.486	-168.118	353.262	893.053	-179.698	753.726	868.291	485.083	473.202	884.312	526.655	469.575	907.739	444.421	376.669	924.657	462.64	286.918	885.654	437.948
301	3	721.802	1400.32	150.982	754.114	1371.8	72.8257	765.511	1369.62	221.942	801.508	1165.62	-0.88803	781.022	1195.39	316.212	708.015	1155.79	144.896	813.578	887.964	-211.58	526.937	894.688	-231.665	534.456	901.074	-145.616	440.657	908.53	-168.131	353.231	893.075	-179.746	753.783	868.984	485.515	473.11	884.377	526.738	469.412	908.028	444.57	376.634	924.768	462.809	286.914	885.714	438.09
302	3.01	722.514	1400.25	151.127	754.23	1371.87	72.9715	765.859	1369.61	222.082	801.543	1165.61	-0.81627	781.252	1195.48	316.153	708.138	1155.78	144.97	813.537	888.031	-211.504	526.978	894.567	-231.632	534.541	900.965	-145.584	440.635	908.546	-168.142	353.208	893.088	-179.809	753.643	869.836	486.048	473.017	884.45	526.826	469.319	908.311	444.761	376.573	924.986	462.874	286.935	885.779	438.258
303	3.02	723.202	1400.17	151.262	754.342	1371.91	73.1574	766.261	1369.6	222.211	801.551	1165.62	-0.71196	781.514	1195.61	316.057	708.252	1155.8	145.058	813.471	888.103	-211.417	526.977	894.48	-231.55	534.562	900.885	-145.497	440.679	908.539	-168.135	353.188	893.065	-179.774	753.51	870.747	486.608	473.014	884.528	526.859	469.184	908.614	444.985	376.513	925.149	463.161	286.947	885.859	438.425
304	3.03	723.973	1400.08	151.353	754.497	1371.99	73.2948	766.654	1369.61	222.313	801.57	1165.66	-0.59739	781.821	1195.79	315.909	708.259	1155.88	145.141	813.392	888.184	-211.399	526.928	894.464	-231.475	534.583	900.824	-145.451	440.654	908.528	-168.061	353.146	893.011	-179.687	753.441	871.594	487.076	473.155	884.63	526.835	469.004	908.928	445.198	376.376	925.322	463.561	286.91	885.939	438.576
305	3.04	724.505	1400.11	151.429	754.675	1372.05	73.3884	767.006	1369.6	222.388	801.623	1165.73	-0.51234	782.173	1196	315.69	708.306	1155.99	145.158	813.321	888.297	-211.405	526.876	894.498	-231.454	534.594	900.737	-145.469	440.622	908.516	-168.033	353.083	892.963	-179.642	753.344	872.596	487.582	473.019	884.764	526.923	468.898	909.309	445.415	375.982	925.655	464.069	286.919	886.039	438.707
306	3.05	724.735	1400.2	151.514	754.818	1372.08	73.5044	767.36	1369.59	222.446	801.646	1165.78	-0.43597	782.565	1196.21	315.423	708.422	1156.07	145.131	813.259	888.439	-211.447	526.811	894.542	-231.488	534.567	900.711	-145.525	440.606	908.509	-168.069	353.05	892.921	-179.626	753.394	873.757	488.071	472.732	884.907	527.137	468.813	909.874	445.748	375.843	925.889	464.693	286.912	886.173	438.813
307	3.06	725.079	1400.29	151.596	754.965	1372.16	73.6272	767.774	1369.57	222.49	801.712	1165.87	-0.31948	782.974	1196.42	315.184	708.383	1156.2	145.177	813.227	888.585	-211.521	526.714	894.592	-231.521	534.439	900.75	-145.518	440.566	908.534	-168.057	352.998	892.903	-179.592	753.564	874.89	488.56	472.416	885.005	527.513	468.815	910.589	446.265	376.025	925.927	465.341	286.924	886.362	438.981
308	3.07	725.256	1400.45	151.711	755.185	1372.26	73.7024	768.165	1369.56	222.532	801.824	1165.96	-0.21086	783.358	1196.67	314.964	708.338	1156.36	145.207	813.196	888.763	-211.572	526.609	894.654	-231.547	534.283	900.801	-145.529	440.523	908.568	-168.052	352.959	892.923	-179.532	753.798	875.993	489.057	472.36	885.063	527.835	468.852	911.35	446.925	376.006	926.123	465.828	286.929	886.681	439.207
309	3.08	725.32	1400.63	151.803	755.396	1372.3	73.7425	768.476	1369.58	222.549	801.875	1166.03	-0.15306	783.667	1196.91	314.733	708.366	1156.49	145.189	813.125	888.897	-211.668	526.574	894.686	-231.618	534.177	900.86	-145.577	440.462	908.594	-168.085	352.936	892.913	-179.528	753.886	877.069	489.503	472.407	885.086	528.214	468.619	912.048	447.599	375.721	926.468	466.469	286.956	887.174	439.457
310	3.09	725.441	1400.75	151.873	755.577	1372.36	73.823	768.817	1369.6	222.566	801.887	1166.07	-0.12721	783.837	1197.12	314.5	708.596	1156.54	145.101	813.064	889.034	-211.759	526.533	894.721	-231.699	534.161	900.857	-145.643	440.419	908.606	-168.125	352.891	892.891	-179.539	753.787	878.1	490.007	472.455	885.08	528.657	468.371	912.781	448.271	375.46	926.909	467.491	287.044	887.803	439.743
311	3.1	725.802	1400.81	151.904	755.706	1372.4	73.9166	769.174	1369.61	222.57	801.883	1166.11	-0.13141	783.932	1197.3	314.296	708.783	1156.59	145.048	813.076	889.232	-211.835	526.481	894.758	-231.719	534.211	900.803	-145.686	440.428	908.636	-168.139	352.844	892.888	-179.532	753.674	878.951	490.538	472.518	885.032	529.155	468.286	913.766	449.012	375.514	927.369	468.637	287.17	888.581	439.957
312	3.11	726.19	1400.82	151.961	755.867	1372.41	73.9962	769.501	1369.62	222.55	801.879	1166.17	-0.14024	783.989	1197.46	314.096	708.851	1156.68	145	813.105	889.454	-212.026	526.415	894.797	-231.706	534.245	900.748	-145.707	440.402	908.665	-168.105	352.82	892.883	-179.515	753.646	879.653	491.054	472.452	884.979	529.694	468.13	915.062	449.893	375.487	928.007	469.632	287.274	889.478	440.112
313	3.12	726.395	1400.88	152.015	756.065	1372.38	74.029	769.779	1369.62	222.509	801.812	1166.22	-0.14519	783.989	1197.57	313.888	708.817	1156.75	144.972	813.078	889.644	-212.26	526.297	894.821	-231.683	534.188	900.708	-145.711	440.321	908.668	-168.09	352.779	892.859	-179.485	753.539	880.404	491.6	472.363	884.96	530.186	467.799	916.275	450.823	374.635	928.971	470.879	287.139	890.429	440.528
314	3.13	726.606	1400.91	152.078	756.207	1372.38	74.0483	770.011	1369.61	222.459	801.748	1166.27	-0.16853	783.95	1197.63	313.706	708.794	1156.78	144.93	813.042	889.831	-212.458	526.21	894.835	-231.68	534.171	900.639	-145.705	440.301	908.662	-168.096	352.738	892.79	-179.446	753.465	881.261	492.129	472.247	884.96	530.635	467.496	917.686	451.964	374.172	929.787	472.366	287.036	891.465	441.125
315	3.14	726.889	1400.93	152.145	756.356	1372.37	74.1165	770.275	1369.6	222.421	801.723	1166.32	-0.18756	783.961	1197.66	313.547	708.931	1156.78	144.861	813.131	890.073	-212.65	526.17	894.846	-231.681	534.249	900.565	-145.692	440.3	908.621	-168.073	352.687	892.707	-179.406	753.373	882.091	492.661	472.084	884.962	531.075	467.196	919.29	453.219	374.457	930.206	474.08	287.009	892.588	441.997
316	3.15	726.991	1401.03	152.216	756.51	1372.35	74.1504	770.53	1369.61	222.41	801.703	1166.41	-0.1776	783.962	1197.67	313.397	709.026	1156.78	144.828	813.101	890.307	-212.814	526.09	894.919	-231.657	534.178	900.551	-145.655	440.247	908.597	-168.048	352.631	892.627	-179.365	753.242	882.752	493.236	471.883	884.99	531.577	466.81	920.987	454.558	373.814	931.118	475.908	286.786	893.97	443.142
317	3.16	727.184	1401.16	152.257	756.635	1372.37	74.1503	770.728	1369.64	222.392	801.636	1166.51	-0.17698	783.962	1197.69	313.256	708.983	1156.82	144.82	812.898	890.518	-213.001	525.933	895.031	-231.632	534.025	900.606	-145.609	440.137	908.586	-167.991	352.567	892.557	-179.322	753.131	883.317	493.842	471.634	885.077	532.159	466.478	922.924	456.034	373.489	932.076	477.737	286.453	895.53	443.958
318	3.17	727.457	1401.23	152.293	756.786	1372.38	74.1582	770.913	1369.66	222.379	801.578	1166.63	-0.18364	783.996	1197.7	313.103	708.975	1156.85	144.793	812.747	890.748	-213.161	525.79	895.142	-231.61	533.889	900.657	-145.596	440.068	908.572	-167.967	352.539	892.463	-179.273	752.986	883.952	494.491	471.44	885.207	532.704	466.161	924.991	457.588	373.301	933.13	479.67	286.039	897.288	444.33
319	3.18	727.82	1401.29	152.309	756.939	1372.36	74.1792	771.075	1369.66	222.357	801.549	1166.75	-0.17834	784.07	1197.7	312.953	709.006	1156.86	144.75	812.674	890.998	-213.257	525.715	895.211	-231.624	533.78	900.659	-145.614	440.017	908.537	-167.959	352.51	892.369	-179.22	752.734	884.675	495.094	471.28	885.381	532.983	465.781	927.62	459.218	372.866	934.449	481.832	285.504	899.423	445.488
320	3.19	728.063	1401.31	152.325	757.041	1372.37	74.1951	771.235	1369.66	222.352	801.502	1166.85	-0.16363	784.122	1197.69	312.809	709.028	1156.85	144.713	812.593	891.2	-213.309	525.585	895.28	-231.622	533.611	900.701	-145.615	439.897	908.541	-167.948	352.401	892.307	-179.172	752.459	885.381	495.589	471.061	885.616	533.07	465.407	930.705	460.909	372.384	935.756	484.113	285.238	901.752	447.079
321	3.2	728.096	1401.35	152.39	757.134	1372.37	74.2087	771.333	1369.66	222.371	801.424	1166.96	-0.14175	784.138	1197.69	312.674	708.942	1156.89	144.709	812.479	891.406	-213.358	525.418	895.365	-231.587	533.445	900.775	-145.625	439.793	908.555	-167.94	352.248	892.274	-179.098	752.223	886.017	496.126	470.769	885.975	532.995	464.955	933.849	462.624	371.615	937.175	486.141	284.763	904.499	448.52
322	3.21	728.081	1401.38	152.51	757.221	1372.37	74.2556	771.397	1369.66	222.415	801.372	1167.05	-0.11462	784.187	1197.72	312.534	708.898	1156.91	144.706	812.421	891.63	-213.427	525.31	895.434	-231.568	533.355	900.796	-145.627	439.702	908.561	-167.897	352.172	892.227	-179.058	751.973	886.645	496.754	470.453	886.452	532.712	464.65	936.905	464.422	371.302	939.081	488.067	284.214	907.672	449.596
323	3.22	728.06	1401.39	152.74	757.301	1372.37	74.3359	771.491	1369.66	222.518	801.346	1167.13	-0.06629	784.293	1197.72	312.429	708.957	1156.9	144.723	812.313	891.84	-213.433	525.238	895.487	-231.545	533.311	900.77	-145.58	439.662	908.554	-167.862	352.101	892.175	-178.993	751.678	887.256	497.429	470.078	887.273	532.534	464.557	940.201	466.12	371.152	941.225	489.863	283.811	911.371	450.455
324	3.23	728.113	1401.38	152.973	757.34	1372.39	74.4363	771.573	1369.67	222.642	801.326	1167.2	0.01189	784.419	1197.72	312.36	708.916	1156.95	144.779	812.139	892.005	-213.394	525.168	895.536	-231.503	533.299	900.705	-145.543	439.592	908.545	-167.789	351.975	892.121	-178.878	751.325	887.992	498.212	469.763	888.557	532.388	464.399	943.72	467.788	370.389	943.69	491.545	283.532	915.487	451.104
325	3.24	728.109	1401.39	153.202	757.413	1372.39	74.536	771.645	1369.66	222.796	801.324	1167.25	0.06995	784.529	1197.74	312.305	708.876	1156.99	144.857	812.076	892.154	-213.367	525.081	895.57	-231.474	533.285	900.667	-145.504	439.544	908.52	-167.765	351.859	892.077	-178.792	751.023	888.78	498.905	469.467	890.083	532.279	464.158	947.221	469.406	370.068	946.508	493.198	283.446	919.889	451.723
326	3.25	728.055	1401.42	153.498	757.446	1372.39	74.6645	771.677	1369.66	222.977	801.334	1167.31	0.11242	784.667	1197.75	312.246	708.918	1157.03	144.932	811.999	892.275	-213.369	525.012	895.624	-231.461	533.356	900.598	-145.53	439.444	908.525	-167.749	351.746	892.007	-178.734	750.724	889.487	499.519	468.886	891.755	531.991	463.901	950.831	470.935	369.749	949.372	494.731	283.398	924.513	452.359
327	3.26	727.973	1401.44	153.782	757.36	1372.43	74.9013	771.686	1369.67	223.175	801.347	1167.36	0.16556	784.859	1197.78	312.197	708.978	1157.04	145.001	811.897	892.39	-213.359	524.963	895.681	-231.457	533.34	900.552	-145.556	439.45	908.518	-167.752	351.639	891.962	-178.683	750.176	890.161	500.23	468.136	893.497	531.617	463.73	954.563	472.541	369.314	952.378	495.988	283.26	929.458	452.641
328	3.27	727.755	1401.48	154.103	757.201	1372.48	75.1788	771.735	1369.66	223.397	801.371	1167.39	0.23202	785.076	1197.81	312.151	708.893	1157.11	145.118	811.806	892.496	-213.316	524.908	895.712	-231.465	533.266	900.542	-145.571	439.379	908.532	-167.738	351.559	891.911	-178.656	749.38	890.899	501.072	467.364	895.464	531.137	463.44	958.386	474.048	368.69	955.615	497.206	282.77	934.73	452.552
329	3.28	727.498	1401.56	154.409	757.086	1372.55	75.3916	771.721	1369.66	223.591	801.389	1167.43	0.28442	785.298	1197.87	312.089	708.866	1157.19	145.185	811.753	892.608	-213.313	524.872	895.746	-231.51	533.15	900.574	-145.609	439.347	908.535	-167.782	351.451	891.897	-178.678	748.597	891.747	501.948	466.429	897.396	530.577	463.019	962.265	475.484	367.989	959.021	498.282	282.141	940.235	452.353
330	3.29	727.276	1401.63	154.696	756.936	1372.61	75.6107	771.727	1369.65	223.789	801.373	1167.47	0.344	785.581	1197.93	312.031	708.801	1157.26	145.26	811.779	892.736	-213.313	524.844	895.782	-231.546	533.092	900.576	-145.666	439.333	908.555	-167.814	351.421	891.886	-178.692	747.856	892.48	502.692	465.503	899.687	530.002	462.704	966.225	476.798	367.658	962.466	499.128	282.037	945.599	452.204
331	3.3	727.197	1401.66	154.958	756.785	1372.67	75.8753	771.816	1369.65	224.015	801.381	1167.5	0.4356	785.838	1198.01	312.025	708.66	1157.38	145.408	811.814	892.872	-213.289	524.845	895.808	-231.551	533.101	900.549	-145.68	439.284	908.606	-167.805	351.423	891.903	-178.708	746.97	893.289	503.514	464.718	901.949	529.346	462.458	970.243	478.079	367.232	965.946	499.847	281.923	950.94	451.93
332	3.31	727.397	1401.6	155.132	756.636	1372.73	76.1508	771.919	1369.66	224.258	801.4	1167.53	0.54871	786.051	1198.09	312.04	708.503	1157.51	145.604	811.802	892.971	-213.256	524.84	895.837	-231.545	533.057	900.562	-145.667	439.273	908.673	-167.778	351.431	891.915	-178.704	746.033	894.237	504.534	463.561	904.426	528.535	462.17	974.207	479.245	366.523	969.577	500.417	281.626	956.463	451.369
333	3.32	727.599	1401.53	155.288	756.471	1372.78	76.4331	772.033	1369.65	224.497	801.416	1167.59	0.70182	786.268	1198.14	312.076	708.394	1157.61	145.765	811.807	893.073	-213.219	524.831	895.854	-231.54	533.001	900.552	-145.665	439.295	908.743	-167.778	351.411	891.929	-178.701	745.235	895.102	505.467	462.504	906.969	527.594	461.831	978.02	480.244	365.712	973.476	500.864	281.364	962.199	450.551
334	3.33	727.678	1401.45	155.427	756.322	1372.81	76.7247	772.138	1369.64	224.731	801.43	1167.63	0.86253	786.506	1198.21	312.102	708.418	1157.65	145.909	811.82	893.172	-213.184	524.828	895.857	-231.548	533.054	900.499	-145.699	439.274	908.812	-167.788	351.378	891.928	-178.694	744.335	896.082	506.399	461.437	909.534	526.702	461.585	981.912	481.095	365.247	977.613	501.091	281.328	968.117	449.649
335	3.34	727.579	1401.4	155.669	756.241	1372.88	77.0278	772.263	1369.63	224.967	801.444	1167.69	1.02623	786.745	1198.25	312.13	708.508	1157.65	146.062	811.861	893.278	-213.127	524.872	895.843	-231.577	533.163	900.431	-145.721	439.338	908.805	-167.837	351.376	891.88	-178.657	743.158	897.022	507.397	460.184	912.381	525.756	461.335	985.842	481.741	364.899	981.941	501.14	281.268	974.36	448.599
336	3.35	727.312	1401.41	156.113	756.078	1372.92	77.3755	772.404	1369.62	225.222	801.418	1167.76	1.20574	786.999	1198.29	312.17	708.563	1157.68	146.253	811.9	893.344	-213.022	524.895	895.847	-231.574	533.204	900.398	-145.723	439.357	908.797	-167.843	351.346	891.817	-178.605	742.011	897.815	508.358	458.825	915.602	524.839	461.165	989.797	482.216	364.771	986.365	500.915	281.325	980.914	447.433
337	3.36	726.999	1401.41	156.675	755.953	1372.96	77.7143	772.493	1369.59	225.5	801.358	1167.86	1.4109	787.234	1198.31	312.236	708.505	1157.75	146.478	811.838	893.355	-212.878	524.857	895.897	-231.545	533.224	900.35	-145.715	439.298	908.793	-167.826	351.192	891.776	-178.525	740.727	898.733	509.26	457.113	918.988	523.926	461.034	993.779	482.48	364.728	990.951	500.477	281.042	987.686	446.241
338	3.37	726.796	1401.41	157.235	755.955	1372.97	77.9978	772.592	1369.54	225.826	801.305	1167.95	1.60617	787.488	1198.33	312.309	708.496	1157.81	146.692	811.826	893.421	-212.685	524.849	895.966	-231.537	533.248	900.262	-145.726	439.246	908.818	-167.8	351.084	891.72	-178.446	739.32	899.584	510.091	455.817	922.449	522.44	460.879	997.802	482.578	364.327	995.728	500.105	280.612	994.662	444.993
339	3.38	726.907	1401.39	157.845	755.993	1372.99	78.3057	772.711	1369.47	226.194	801.241	1168.04	1.79469	787.76	1198.35	312.387	708.508	1157.87	146.915	811.788	893.428	-212.476	524.859	896.013	-231.517	533.227	900.189	-145.677	439.224	908.841	-167.775	351.038	891.649	-178.418	737.88	900.389	510.909	455.126	925.871	520.177	460.711	1001.92	482.561	363.788	1000.68	499.714	280.672	1001.45	443.889
340	3.39	727.1	1401.42	158.449	755.925	1373.05	78.7299	772.876	1369.39	226.622	801.204	1168.13	1.99072	788.047	1198.35	312.465	708.509	1157.93	147.152	811.769	893.441	-212.297	524.858	896.049	-231.469	533.217	900.155	-145.586	439.193	908.862	-167.737	350.962	891.594	-178.358	736.223	901.274	511.755	453.858	929.48	518.563	460.427	1006.16	482.483	363.315	1005.88	499.286	280.714	1008.2	442.741
341	3.4	727.412	1401.37	158.88	755.782	1373.1	79.2746	773.057	1369.32	227.099	801.14	1168.24	2.19721	788.307	1198.34	312.523	708.488	1158.01	147.398	811.733	893.478	-212.058	524.813	896.079	-231.418	533.067	900.222	-145.476	439.123	908.878	-167.714	350.87	891.593	-178.327	734.562	902.114	512.402	452.254	933.279	517.281	460.077	1010.48	482.332	363.039	1011.16	498.697	280.821	1015.1	441.516
342	3.41	727.922	1401.2	159.254	755.652	1373.2	79.8251	773.276	1369.27	227.569	801.11	1168.36	2.3869	788.548	1198.34	312.563	708.468	1158.1	147.634	811.676	893.525	-211.828	524.781	896.099	-231.368	532.907	900.299	-145.414	439.099	908.906	-167.702	350.791	891.599	-178.334	732.846	903.024	512.962	450.77	937.262	515.884	459.794	1014.87	482.067	362.537	1016.4	497.866	280.835	1022.16	440.154
343	3.42	728.047	1401.16	159.725	755.628	1373.28	80.3307	773.509	1369.2	228.025	801.105	1168.5	2.5539	788.78	1198.34	312.593	708.477	1158.2	147.891	811.654	893.564	-211.602	524.777	896.095	-231.341	532.898	900.292	-145.401	439.067	908.945	-167.716	350.75	891.587	-178.335	730.849	903.774	513.719	449.679	941.365	514.264	459.776	1019.3	481.731	362.201	1021.65	496.917	281.052	1029.34	438.649
344	3.43	727.517	1401.25	160.412	755.552	1373.34	80.8972	773.707	1369.13	228.471	801.119	1168.64	2.73698	788.972	1198.34	312.64	708.547	1158.32	148.172	811.651	893.629	-211.387	524.776	896.111	-231.32	532.883	900.274	-145.383	439.047	909.01	-167.712	350.691	891.601	-178.359	728.843	904.624	514.402	448.289	945.396	512.486	459.868	1023.85	481.368	361.987	1027.2	496.044	281.377	1036.71	437.03
345	3.44	726.962	1401.34	161.202	755.4	1373.41	81.4554	773.889	1369.04	228.923	801.112	1168.79	2.90761	789.13	1198.33	312.712	708.649	1158.49	148.467	811.663	893.689	-211.149	524.778	896.125	-231.296	532.779	900.304	-145.308	439.033	909.065	-167.725	350.619	891.624	-178.356	727.081	905.568	514.851	446.609	949.544	510.876	459.923	1028.53	480.989	361.603	1032.74	494.988	281.734	1044.32	435.299
346	3.45	726.895	1401.33	161.936	755.473	1373.48	81.8889	774.051	1368.96	229.402	801.082	1168.94	3.08388	789.301	1198.31	312.77	708.711	1158.66	148.794	811.697	893.737	-210.912	524.775	896.126	-231.263	532.705	900.309	-145.247	439.01	909.095	-167.724	350.536	891.626	-178.362	725.193	906.522	515.384	444.698	953.925	509.169	459.648	1033.27	480.699	361.15	1038.28	493.764	282.231	1052.06	433.343
347	3.46	727.216	1401.24	162.554	755.528	1373.58	82.3762	774.271	1368.88	229.915	801.079	1169.09	3.28399	789.506	1198.3	312.832	708.831	1158.77	149.081	811.788	893.817	-210.673	524.819	896.101	-231.234	532.773	900.246	-145.232	438.982	909.108	-167.744	350.556	891.626	-178.419	723.074	907.529	515.984	443.092	958.263	507.315	459.191	1038.19	480.542	360.994	1043.91	492.456	282.826	1059.81	431.288
348	3.47	727.902	1401.04	163.104	755.354	1373.74	83.0172	774.536	1368.77	230.485	801.088	1169.23	3.48301	789.741	1198.27	312.902	709.036	1158.81	149.338	811.885	893.905	-210.401	524.893	896.076	-231.216	532.87	900.153	-145.236	439.028	909.131	-167.783	350.606	891.616	-178.48	720.903	908.32	516.493	441.387	962.603	505.343	459.352	1043.15	480.142	361.024	1049.58	491	283.644	1067.6	429.174
349	3.48	728.229	1400.91	163.823	755.127	1373.89	83.7048	774.771	1368.65	231.108	801.034	1169.39	3.69955	789.97	1198.24	313	709.205	1158.86	149.611	811.977	893.993	-210.2	524.951	896.055	-231.178	532.913	900.086	-145.207	439.06	909.165	-167.802	350.626	891.628	-178.506	718.62	909.29	516.911	439.641	967.005	503.332	459.33	1047.93	479.6	361.273	1055.33	489.373	284.647	1075.55	426.875
350	3.49	727.914	1400.95	164.656	754.884	1374.01	84.4124	774.886	1368.57	231.741	800.947	1169.56	3.93341	790.198	1198.23	313.118	709.349	1158.93	149.868	812.009	894.049	-210.036	524.968	896.062	-231.162	532.857	900.066	-145.158	439.034	909.198	-167.798	350.608	891.661	-178.549	716.357	910.209	517.227	438.281	971.636	501.017	459.152	1052.68	478.992	361.101	1061.25	487.764	285.78	1083.65	424.423
351	3.5	727.441	1401.05	165.445	754.738	1374.09	85.057	775.043	1368.49	232.3	800.867	1169.74	4.1619	790.444	1198.21	313.227	709.468	1158.98	150.082	812.111	894.127	-209.856	524.983	896.086	-231.138	532.925	900.011	-145.14	439.028	909.227	-167.797	350.608	891.704	-178.61	714.177	911.25	517.651	437.159	976.443	498.467	458.908	1057.25	477.978	361.147	1067.22	485.816	287.13	1091.86	421.812
352	3.51	727.185	1401.1	166.148	754.722	1374.14	85.5766	775.313	1368.42	232.812	800.771	1169.9	4.40103	790.689	1198.2	313.34	709.562	1159.05	150.305	812.188	894.18	-209.654	524.98	896.116	-231.122	532.97	899.96	-145.133	439.008	909.263	-167.786	350.603	891.733	-178.62	712.024	912.309	518.307	436.503	981.325	495.635	458.602	1061.62	476.32	361.311	1073.31	483.784	288.592	1100.09	419.045
353	3.52	727.372	1401	166.712	754.688	1374.17	86.1005	775.489	1368.35	233.286	800.669	1170.05	4.65244	790.908	1198.19	313.446	709.643	1159.09	150.536	812.272	894.214	-209.557	524.97	896.144	-231.089	532.955	899.909	-145.125	438.983	909.312	-167.765	350.513	891.74	-178.579	709.96	913.463	518.921	436.116	986.444	492.515	458.821	1066.42	475	361.753	1079.52	481.488	290.214	1108.36	416.081
354	3.53	727.78	1400.84	167.303	754.448	1374.3	86.7418	775.62	1368.27	233.788	800.557	1170.15	4.90352	791.11	1198.19	313.542	709.735	1159.12	150.786	812.434	894.253	-209.562	524.966	896.185	-231.054	532.834	899.909	-145.073	438.975	909.337	-167.767	350.475	891.724	-178.557	708.05	914.75	519.506	435.447	991.613	489.681	459.116	1071.37	473.532	362.298	1085.82	479.112	292.067	1116.72	412.916
355	3.54	727.918	1400.76	168.087	754.196	1374.47	87.3874	775.809	1368.22	234.362	800.513	1170.24	5.15542	791.332	1198.18	313.632	709.832	1159.16	151.078	812.497	894.351	-209.427	524.962	896.225	-231.02	532.739	899.903	-145.012	438.955	909.357	-167.747	350.465	891.698	-178.54	706.192	916.025	520.074	434.44	996.885	486.873	459.471	1076.26	471.871	363.03	1092.2	476.332	294.293	1124.92	409.448
356	3.55	727.881	1400.77	168.922	753.968	1374.61	88.0476	775.979	1368.17	234.932	800.508	1170.31	5.36967	791.557	1198.18	313.712	709.971	1159.22	151.413	812.534	894.42	-209.27	525.007	896.224	-231.003	532.745	899.865	-144.987	438.991	909.338	-167.745	350.405	891.699	-178.504	704.441	917.292	520.805	433.576	1002.17	484.217	460.168	1081.22	470.05	364.149	1098.77	473.412	296.764	1133.01	405.734
357	3.56	727.459	1400.82	169.707	753.739	1374.7	88.6748	776.145	1368.09	235.501	800.506	1170.39	5.57167	791.783	1198.21	313.798	710.176	1159.28	151.699	812.604	894.52	-209.058	525.046	896.217	-230.984	532.724	899.863	-144.95	439.031	909.378	-167.777	350.428	891.691	-178.496	702.527	918.342	521.915	433.025	1007.58	481.572	461.014	1086.22	468.091	365.161	1105.25	470.298	299.144	1140.99	401.844
358	3.57	727.182	1400.81	170.255	753.55	1374.76	89.1627	776.266	1368.04	236.002	800.47	1170.45	5.78476	791.991	1198.24	313.89	710.294	1159.37	151.963	812.671	894.649	-208.84	525.039	896.227	-230.983	532.717	899.844	-144.951	439.009	909.411	-167.812	350.439	891.707	-178.531	700.488	919.611	522.356	432.511	1011.39	479.797	462.086	1091.23	466.004	366.372	1111.9	467.053	301.758	1148.99	397.725
359	3.58	727.309	1400.76	170.66	753.47	1374.79	89.5386	776.405	1367.99	236.429	800.481	1170.53	5.97434	792.21	1198.29	313.974	710.506	1159.44	152.212	812.705	894.727	-208.667	525.072	896.22	-231.008	532.715	899.854	-144.969	439.019	909.462	-167.848	350.425	891.724	-178.57	697.998	920.556	522.182				463.041	1096.15	463.814	368.057	1118.64	463.783	305.054	1156.85	393.347
360	3.59	727.357	1400.72	171.131	753.426	1374.83	89.9548	776.523	1367.96	236.819	800.515	1170.65	6.16461	792.451	1198.35	314.046	710.721	1159.49	152.46	812.743	894.784	-208.502	525.111	896.215	-231.026	532.676	899.873	-144.995	438.995	909.516	-167.874	350.454	891.733	-178.625	695.144	922.112	522.749	431.44	1025.98	472.515	464.103	1101.05	461.508	369.717	1125.32	460.286	308.769	1164.79	388.775
361	3.6	727.321	1400.68	171.685	753.275	1374.88	90.4491	776.502	1367.92	237.212	800.562	1170.79	6.35679	792.706	1198.43	314.11	710.837	1159.57	152.721	812.612	894.823	-208.129	525.144	896.218	-231.031	532.665	899.85	-145.027	438.982	909.561	-167.895	350.448	891.736	-178.656	692.707	923.532	523.107	431.213	1030.2	470.326	465.62	1105.95	459.007	371.418	1131.83	456.497	312.436	1172.48	384.041
362	3.61	727.138	1400.64	172.299	753.08	1374.91	90.9577	776.413	1367.88	237.608	800.586	1170.93	6.54384	792.939	1198.49	314.162	710.841	1159.66	152.959	812.237	894.827	-207.524	525.122	896.25	-231.027	532.641	899.826	-145.043	438.957	909.629	-167.895	350.409	891.733	-178.639	690.441	924.96	523.465	431.024	1035.29	467.574	467.038	1110.72	456.343	373.393	1138.27	452.663	316.24	1179.83	379.255
363	3.62	726.929	1400.61	172.951	752.803	1374.93	91.5036	776.373	1367.84	238.049	800.599	1171.06	6.72611	793.127	1198.54	314.187	710.807	1159.72	153.194	812.11	894.837	-207.175	525.135	896.266	-231.018	532.567	899.819	-145.019	438.906	909.704	-167.897	350.352	891.719	-178.597	687.772	926.401	523.808	431.423	1040.42	464.759	468.491	1115.41	453.669	375.857	1144.61	448.721	320.139	1187.09	374.288
364	3.63	726.638	1400.64	173.561	752.437	1374.95	92.0566	776.291	1367.83	238.519	800.623	1171.19	6.9082	793.356	1198.6	314.204	710.756	1159.79	153.436	812.078	894.875	-206.908	525.187	896.276	-230.993	532.521	899.796	-144.983	438.925	909.756	-167.898	350.296	891.703	-178.587	685.105	927.836	524.116	432.31	1045.42	461.517	469.946	1120.03	450.928	378.166	1150.97	444.561	324.242	1194.08	369.263
365	3.64	726.643	1400.54	174.043	752.088	1374.99	92.5854	776.225	1367.79	239	800.619	1171.31	7.09544	793.586	1198.64	314.212	710.758	1159.8	153.646	812.031	894.873	-206.626	525.262	896.253	-230.96	532.521	899.762	-144.916	438.973	909.752	-167.893	350.276	891.684	-178.562	682.816	929.368	524.339	432.878	1050.56	458.34	471.661	1124.64	448.273	379.986	1157.08	440.487	328.547	1200.86	364.128
366	3.65	726.963	1400.34	174.348	751.918	1375.01	92.9803	776.147	1367.73	239.448	800.606	1171.4	7.27271	793.836	1198.67	314.192	710.825	1159.79	153.849	811.907	894.831	-206.336	525.3	896.225	-230.931	532.522	899.734	-144.874	439.006	909.703	-167.872	350.275	891.663	-178.514	680.488	931.085	524.663	433.682	1055.71	455.285	473.247	1129.1	445.488	382.361	1162.91	436.319	332.855	1207.53	358.831
367	3.66	727.056	1400.18	174.629	751.902	1375.04	93.205	776.04	1367.66	239.818	800.571	1171.49	7.43121	794.088	1198.73	314.131	710.914	1159.79	154.001	811.856	894.791	-206.079	525.32	896.214	-230.913	532.548	899.693	-144.874	439.035	909.694	-167.874	350.241	891.661	-178.468	678.165	932.805	525.002	434.234	1060.84	452.047	474.959	1133.42	442.629	384.873	1168.72	432.168	337.244	1213.94	353.527
368	3.67	726.71	1400.17	175.012	751.763	1375.07	93.4562	775.949	1367.6	240.124	800.534	1171.58	7.56943	794.344	1198.81	314.043	710.896	1159.83	154.154	811.855	894.761	-205.832	525.326	896.216	-230.928	532.551	899.681	-144.88	439.003	909.718	-167.898	350.225	891.659	-178.457	675.976	934.418	525.321	434.416	1065.92	448.613	476.704	1137.64	439.642	387.294	1174.51	427.776	341.752	1220.08	348.324
369	3.68	725.944	1400.25	175.54	751.489	1375.08	93.7988	775.847	1367.54	240.412	800.479	1171.69	7.71894	794.62	1198.91	313.962	710.819	1159.96	154.334	811.905	894.759	-205.609	525.334	896.215	-230.934	532.514	899.699	-144.889	438.978	909.767	-167.919	350.208	891.656	-178.446	673.534	936.319	525.645	434.929	1070.91	445.298	478.715	1141.82	436.701	389.896	1180.07	423.375	346.435	1226.02	343.08
370	3.69	725.11	1400.37	176.093	751.162	1375.1	94.2137	775.748	1367.49	240.74	800.425	1171.8	7.90127	794.902	1199.03	313.879	710.644	1160.15	154.582	811.995	894.745	-205.392	525.328	896.238	-230.926	532.452	899.731	-144.893	438.969	909.849	-167.92	350.182	891.658	-178.415	671.08	938.135	525.92	435.491	1075.92	442.104	480.746	1145.91	433.677	392.768	1185.54	418.923	351.205	1231.83	337.717
371	3.7	724.569	1400.39	176.585	750.777	1375.1	94.6556	775.594	1367.44	241.08	800.394	1171.92	8.05395	795.201	1199.17	313.763	710.544	1160.28	154.821	812.096	894.709	-205.17	525.372	896.283	-230.925	532.443	899.735	-144.901	438.915	909.948	-167.903	350.142	891.649	-178.385	668.874	939.876	526.019	436.01	1080.95	438.668	482.868	1149.92	430.654	395.607	1190.75	414.347	356.031	1237.49	332.408
372	3.71	724.212	1400.31	177.144	750.387	1375.09	95.0721	775.432	1367.38	241.427	800.369	1172.05	8.18667	795.562	1199.31	313.644	710.533	1160.37	155.063	812.18	894.631	-204.949	525.413	896.306	-230.907	532.486	899.72	-144.895	438.926	910.034	-167.888	350.155	891.64	-178.372	666.661	941.703	526.029	437.646	1085.42	434.831	484.895	1153.86	427.547	398.68	1195.99	409.788	360.933	1243.03	327.206
373	3.72	723.923	1400.2	177.685	749.97	1375.1	95.4946	775.306	1367.32	241.819	800.31	1172.15	8.3048	795.92	1199.44	313.54	710.581	1160.43	155.304	812.209	894.543	-204.737	525.465	896.323	-230.878	532.541	899.689	-144.887	438.927	910.072	-167.882	350.175	891.601	-178.339	664.464	943.66	526.093	439.024	1089.86	431.227	487.078	1157.73	424.439	401.815	1201.17	405.166	365.918	1248.47	321.995
374	3.73	723.894	1400.01	178.04	749.503	1375.11	95.9372	775.093	1367.25	242.197	800.194	1172.25	8.41792	796.179	1199.52	313.415	710.482	1160.48	155.524	812.247	894.478	-204.538	525.497	896.314	-230.862	532.551	899.679	-144.869	438.964	910.081	-167.887	350.116	891.557	-178.302	662.17	945.68	526.146	440.142	1094.54	427.605	489.269	1161.46	421.234	405.054	1206.24	400.598	371.034	1253.83	316.66
375	3.74	724.008	1399.75	178.237	749.075	1375.09	96.327	774.78	1367.18	242.532	800.059	1172.35	8.50965	796.43	1199.57	313.233	710.415	1160.46	155.708	812.279	894.413	-204.356	525.499	896.267	-230.866	532.489	899.696	-144.852	438.956	910.066	-167.935	350.056	891.507	-178.297	659.983	947.551	526.141	441.097	1099.23	423.805	491.677	1165.21	418.059	408.58	1211.17	395.908	376.498	1259.06	311.319
376	3.75	723.884	1399.5	178.459	748.676	1375.03	96.6673	774.487	1367.11	242.844	799.908	1172.43	8.57573	796.729	1199.62	313.018	710.492	1160.3	155.897	812.312	894.335	-204.153	525.559	896.218	-230.907	532.388	899.725	-144.839	438.929	910.056	-167.989	350.057	891.435	-178.299	657.713	949.487	526.091	442.455	1103.76	420.027	494.053	1168.97	414.838	412.068	1216.15	391.099	382.578	1264.26	306.223
377	3.76	723.521	1399.33	178.758	748.316	1374.95	96.8933	774.193	1367.05	243.14	799.774	1172.54	8.63694	797.012	1199.69	312.801	710.738	1160.03	156.155	812.382	894.28	-203.931	525.568	896.187	-230.909	532.369	899.701	-144.847	438.937	910.021	-168.033	349.987	891.347	-178.275	655.241	951.651	526.012	444.185	1108.23	416.417	496.758	1172.71	411.638	415.829	1221.05	386.347	389.066	1269.45	301.522
378	3.77	722.907	1399.16	179.083	747.987	1374.88	97.0611	773.887	1367	243.398	799.63	1172.67	8.70019	797.242	1199.8	312.572	710.564	1160.06	156.309	812.384	894.202	-203.689	525.557	896.178	-230.894	532.353	899.695	-144.848	438.883	910.003	-168.03	349.828	891.252	-178.19	652.785	953.776	525.914	445.491	1112.91	412.728	499.45	1176.42	408.345	419.753	1225.84	381.723	394.524	1274.31	296.33
379	3.78	722.367	1398.97	179.389	747.598	1374.81	97.2782	773.617	1366.96	243.635	799.505	1172.79	8.76574	797.454	1199.92	312.329	710.234	1160.22	156.401	812.311	894.088	-203.414	525.547	896.191	-230.877	532.341	899.695	-144.847	438.856	910.015	-168.017	349.76	891.177	-178.142	650.549	955.64	525.764	446.931	1117.78	409.018	502.258	1180.14	405.169	424.34	1230.73	376.9	399.781	1279.19	290.622
380	3.79	721.807	1398.82	179.765	747.214	1374.75	97.5189	773.285	1366.93	243.856	799.429	1172.92	8.84647	797.726	1200.07	312.073	710.101	1160.34	156.555	812.249	893.954	-203.115	525.575	896.202	-230.828	532.28	899.719	-144.796	438.839	910.058	-167.98	349.749	891.139	-178.101	648.323	957.597	525.476	449.03	1122.38	405.486	505.095	1183.76	401.978	428.915	1235.56	371.984	405.877	1284.07	285.308
381	3.8	721.204	1398.7	180.112	746.834	1374.7	97.7247	772.894	1366.9	244.06	799.334	1173.04	8.9407	798.07	1200.25	311.836	709.917	1160.5	156.676	812.2	893.822	-202.808	525.632	896.207	-230.739	532.285	899.698	-144.746	438.835	910.104	-167.931	349.728	891.135	-178.075	645.996	959.856	525.129	450.964	1127.06	401.897	508.162	1187.35	398.895	433.316	1240.56	367.478	412.302	1288.95	280.163
382	3.81	720.556	1398.62	180.395	746.324	1374.66	97.964	772.436	1366.91	244.255	799.216	1173.15	9.0146	798.417	1200.46	311.556	709.977	1160.55	156.812	812.096	893.673	-202.515	525.645	896.224	-230.69	532.218	899.714	-144.689	438.819	910.178	-167.903	349.71	891.136	-178.073	643.632	962.095	524.804	452.76	1132.05	398.305	511.269	1190.97	395.813	438.159	1245.4	362.742	419.079	1293.76	275.196
383	3.82	719.86	1398.62	180.583	745.816	1374.61	98.1436	771.913	1366.93	244.41	799.099	1173.25	9.06028	798.76	1200.67	311.256	709.996	1160.57	156.875	812.073	893.553	-202.251	525.649	896.245	-230.677	532.247	899.689	-144.66	438.849	910.205	-167.921	349.736	891.157	-178.095	641.208	964.191	524.506	454.776	1136.96	394.933	514.583	1194.59	392.76	442.565	1250.27	358.22	426.132	1298.57	270.448
384	3.83	719.336	1398.57	180.641	745.426	1374.52	98.2269	771.403	1366.95	244.542	799.004	1173.33	9.11066	799.08	1200.84	310.954	710.005	1160.57	156.901	812.09	893.458	-202.025	525.659	896.244	-230.636	532.276	899.655	-144.654	438.88	910.204	-167.937	349.709	891.161	-178.117	638.823	966.43	524.166	457.098	1141.9	391.405	518.234	1198.26	389.842	447.898	1255.2	353.683	433.414	1303.4	266.053
[truncated: 291 more rows]

## Sheet: Trial02
PathFileType	4	(X/Y/Z)	Trial02.trc
DataRate	CameraRate	NumFrames	NumMarkers	Units	OrigDataRate	OrigDataStartFrame	OrigNumFrames
100	100	650	16	mm	100	1	650
[truncated: 652 more rows]

## Sheet: Trial03
PathFileType	4	(X/Y/Z)	Trial03.trc
[truncated: 633 more rows]
