# Supplementary material for: Upper-Limb Kinematic Variables are correlated with Fugl-Meyer Assessment Sub Scales During a Hand-to-Mouth Functional Task in Post-Stroke Individuals
Source: Research Square preprint supplement (doi:10.21203/rs.3.rs-8270137/v1), 2025-12-16
Supplement: Supplementary file 28 [file Additional file 5.xls]

## Sheet: Static
PathFileType	4	(X/Y/Z)	Static.trc
DataRate	CameraRate	NumFrames	NumMarkers	Units	OrigDataRate	OrigDataStartFrame	OrigNumFrames
100	100	747	17	mm	100	1	747
Frame#	Time	nasion			r zyg pr			l zyg pr			r should			l should			sternum			r elbow			r ulna			r radius			r hand			r finger			l elbow			l ulna			l radius			l hand			l finger
		X1	Y1	Z1	X2	Y2	Z2	X3	Y3	Z3	X4	Y4	Z4	X5	Y5	Z5	X6	Y6	Z6	X7	Y7	Z7	X8	Y8	Z8	X9	Y9	Z9	X10	Y10	Z10	X11	Y11	Z11	X12	Y12	Z12	X13	Y13	Z13	X14	Y14	Z14	X15	Y15	Z15	X16	Y16	Z16
1	0	504.981	1239.82	150.145	551.095	1238.99	78.0747	556.596	1233	215.72	628.245	1039.62	-17.3347	639.045	1048.86	296.72	565.779	1012.99	153.099	640.095	671.501	-120.028	364.102	701.66	-106.09	373.477	711.888	-31.4148	278.686	718.873	-53.7286	177.141	688.244	-36.7326	666.673	673.41	393.946	398.728	699.825	425.114	390.097	709.844	351.824	295.981	720.166	385.08	199.971	691.46	376.407
2	0.01	504.948	1239.81	150.184	551.132	1239.01	78.0653	556.596	1232.95	215.762	628.282	1039.73	-17.2516	639.038	1048.87	296.711	565.741	1013.03	153.1	640.084	671.533	-120.008	364.121	701.658	-106.101	373.471	711.926	-31.4211	278.669	718.897	-53.7444	177.188	688.257	-36.7471	666.623	673.357	393.933	398.779	699.831	425.109	390.082	709.859	351.817	296.04	720.166	385.069	200.419	691.155	376.385
3	0.02	504.966	1239.75	150.206	551.164	1238.96	78.0748	556.5	1232.9	215.851	628.282	1039.76	-17.224	639.062	1048.87	296.719	565.772	1013.02	153.11	640.12	671.555	-119.99	364.132	701.651	-106.107	373.457	711.933	-31.4232	278.682	718.898	-53.7571	177.213	688.254	-36.7842	666.614	673.327	393.937	398.786	699.823	425.117	390.123	709.853	351.821	296.069	720.161	385.06	201.009	690.748	376.367
4	0.03	505.065	1239.64	150.19	551.188	1238.88	78.0917	556.504	1232.84	215.891	628.26	1039.76	-17.1608	639.078	1048.84	296.724	565.804	1012.97	153.123	640.113	671.551	-119.966	364.144	701.651	-106.084	373.419	711.927	-31.4132	278.697	718.868	-53.7585	177.23	688.246	-36.7861	666.553	673.286	393.927	398.787	699.81	425.132	390.164	709.825	351.814	296.113	720.129	385.066	200.715	690.939	376.38
5	0.04	505.236	1239.47	150.193	551.226	1238.77	78.0963	556.594	1232.76	215.922	628.262	1039.71	-17.1455	639.089	1048.82	296.727	565.852	1012.89	153.13	640.084	671.548	-119.987	364.161	701.623	-106.063	373.416	711.9	-31.4078	278.726	718.828	-53.7769	177.253	688.228	-36.7977	666.524	673.276	393.908	398.774	699.781	425.145	390.138	709.822	351.832	296.162	720.095	385.057	201.111	690.645	376.358
6	0.05	505.262	1239.29	150.221	551.242	1238.63	78.0952	556.717	1232.67	215.954	628.271	1039.65	-17.1497	639.096	1048.77	296.742	565.88	1012.82	153.159	640.104	671.556	-119.991	364.151	701.591	-106.055	373.398	711.862	-31.3893	278.752	718.804	-53.794	177.276	688.196	-36.8249	666.523	673.253	393.885	398.795	699.763	425.143	390.225	709.761	351.843	296.178	720.062	385.058	200.343	691.164	376.37
7	0.06	505.27	1239.09	150.252	551.22	1238.5	78.1205	556.763	1232.59	215.984	628.224	1039.69	-17.1053	639.072	1048.73	296.77	565.867	1012.77	153.186	640.103	671.55	-119.966	364.156	701.566	-106.059	373.36	711.849	-31.3655	278.745	718.804	-53.7927	177.292	688.17	-36.8367	666.517	673.213	393.875	398.742	699.747	425.143	390.169	709.756	351.837	296.166	720.053	385.074	200.558	690.988	376.375
8	0.07	505.262	1238.9	150.278	551.202	1238.36	78.1284	556.833	1232.49	215.975	628.188	1039.7	-17.0746	639.049	1048.73	296.795	565.833	1012.75	153.207	640.082	671.543	-119.957	364.172	701.583	-106.092	373.359	711.86	-31.3617	278.705	718.803	-53.7743	177.263	688.151	-36.835	666.514	673.172	393.848	398.724	699.744	425.131	390.111	709.77	351.845	296.173	720.049	385.08	201.026	690.637	376.37
9	0.08	505.265	1238.69	150.292	551.163	1238.21	78.1287	556.98	1232.38	215.935	628.167	1039.71	-17.0384	639.033	1048.73	296.815	565.775	1012.79	153.235	640.078	671.557	-119.963	364.178	701.605	-106.093	373.366	711.868	-31.3652	278.695	718.817	-53.7598	177.203	688.177	-36.8049	666.519	673.171	393.803	398.738	699.75	425.12	390.113	709.787	351.843	296.137	720.06	385.079	200.271	691.179	376.403
10	0.09	505.345	1238.42	150.261	551.127	1238.04	78.1272	557.178	1232.26	215.87	628.169	1039.74	-17.0211	639.034	1048.74	296.831	565.671	1012.83	153.256	640.112	671.583	-119.958	364.174	701.614	-106.08	373.354	711.87	-31.3652	278.7	718.835	-53.7621	177.177	688.237	-36.8022	666.528	673.173	393.782	398.763	699.764	425.129	390.129	709.801	351.815	296.103	720.085	385.063	200.522	691.03	376.39
11	0.1	505.497	1238.07	150.212	551.049	1237.86	78.1279	557.274	1232.12	215.847	628.148	1039.77	-17.0044	639.048	1048.74	296.853	565.648	1012.84	153.255	640.112	671.601	-119.944	364.165	701.628	-106.081	373.393	711.885	-31.3885	278.69	718.857	-53.7773	177.173	688.252	-36.8184	666.509	673.151	393.766	398.785	699.773	425.135	390.168	709.804	351.817	296.123	720.103	385.048	201.026	690.688	376.357
12	0.11	505.568	1237.71	150.202	550.978	1237.65	78.1252	557.29	1231.93	215.858	628.144	1039.8	-16.9597	639.088	1048.74	296.875	565.708	1012.85	153.28	640.114	671.628	-119.945	364.166	701.644	-106.083	373.379	711.897	-31.3882	278.702	718.871	-53.7912	177.222	688.26	-36.8248	666.528	673.131	393.759	398.787	699.77	425.13	390.159	709.803	351.831	296.119	720.133	385.037	200.741	690.917	376.355
13	0.12	505.533	1237.33	150.241	550.908	1237.4	78.138	557.26	1231.76	215.884	628.216	1039.83	-16.9036	639.13	1048.73	296.901	565.776	1012.86	153.319	640.106	671.646	-119.951	364.183	701.642	-106.081	373.375	711.895	-31.3762	278.715	718.865	-53.7728	177.199	688.274	-36.8068	666.541	673.083	393.718	398.816	699.764	425.135	390.145	709.803	351.836	296.13	720.126	385.045	201.107	690.662	376.355
14	0.13	505.441	1236.95	150.227	550.798	1237.16	78.1286	557.187	1231.56	215.896	628.274	1039.85	-16.8756	639.159	1048.71	296.919	565.765	1012.88	153.353	640.11	671.638	-119.95	364.182	701.649	-106.07	373.379	711.885	-31.3653	278.697	718.866	-53.7614	177.157	688.26	-36.7979	666.551	673.059	393.694	398.816	699.746	425.133	390.172	709.808	351.835	296.121	720.129	385.067	200.296	691.226	376.388
15	0.14	505.337	1236.61	150.188	550.729	1236.91	78.1011	557.063	1231.4	215.91	628.329	1039.87	-16.8651	639.198	1048.68	296.93	565.796	1012.87	153.357	640.146	671.666	-119.918	364.177	701.639	-106.058	373.37	711.893	-31.3697	278.688	718.848	-53.7746	177.191	688.242	-36.7973	666.539	673.03	393.705	398.773	699.731	425.13	390.203	709.773	351.814	296.129	720.103	385.064	200.061	691.363	376.391
16	0.15	505.303	1236.31	150.18	550.664	1236.67	78.0753	556.973	1231.21	215.935	628.401	1039.87	-16.8296	639.255	1048.66	296.941	565.9	1012.84	153.354	640.169	671.708	-119.893	364.194	701.624	-106.062	373.364	711.88	-31.3593	278.717	718.83	-53.7786	177.237	688.214	-36.8271	666.534	673.006	393.727	398.77	699.73	425.131	390.213	709.769	351.825	296.142	720.082	385.064	200.042	691.377	376.389
17	0.16	505.312	1236.03	150.212	550.537	1236.46	78.0851	556.947	1231.07	215.959	628.52	1039.89	-16.793	639.336	1048.64	296.954	566.013	1012.81	153.346	640.173	671.728	-119.896	364.19	701.624	-106.061	373.351	711.865	-31.3497	278.718	718.827	-53.7739	177.242	688.193	-36.8399	666.497	672.952	393.741	398.804	699.722	425.15	390.217	709.776	351.864	296.164	720.077	385.072	200.058	691.365	376.394
18	0.17	505.245	1235.77	150.23	550.427	1236.25	78.099	556.727	1230.96	215.984	628.568	1039.89	-16.8085	639.396	1048.63	296.967	566.121	1012.79	153.341	640.202	671.729	-119.881	364.168	701.639	-106.067	373.366	711.871	-31.3415	278.711	718.819	-53.7741	177.266	688.187	-36.8398	666.473	672.911	393.744	398.792	699.722	425.158	390.223	709.742	351.856	296.169	720.07	385.084	200.067	691.358	376.39
19	0.18	505.193	1235.53	150.232	550.316	1236.09	78.1237	556.408	1230.88	216.051	628.666	1039.89	-16.7899	639.471	1048.62	296.975	566.204	1012.77	153.346	640.203	671.714	-119.872	364.155	701.644	-106.074	373.378	711.878	-31.3427	278.729	718.821	-53.7884	177.291	688.19	-36.8571	666.513	672.907	393.766	398.786	699.702	425.151	390.244	709.749	351.853	296.179	720.071	385.093	200.076	691.355	376.388
20	0.19	505.178	1235.33	150.272	550.182	1235.96	78.1581	556.207	1230.78	216.087	628.787	1039.88	-16.7588	639.538	1048.61	296.985	566.277	1012.76	153.363	640.226	671.717	-119.87	364.195	701.652	-106.052	373.382	711.88	-31.3549	278.727	718.828	-53.7825	177.285	688.186	-36.8397	666.558	672.889	393.777	398.794	699.705	425.139	390.212	709.786	351.873	296.19	720.084	385.108	200.519	691.056	376.385
21	0.2	505.122	1235.18	150.321	550.004	1235.86	78.2078	556.168	1230.68	216.097	628.871	1039.89	-16.7512	639.594	1048.62	296.995	566.316	1012.74	153.387	640.245	671.717	-119.847	364.214	701.659	-106.032	373.393	711.878	-31.3436	278.72	718.842	-53.756	177.246	688.22	-36.7984	666.595	672.901	393.741	398.837	699.731	425.155	390.269	709.766	351.875	296.183	720.085	385.124	201.057	690.685	376.393
22	0.21	505.016	1235.1	150.344	549.808	1235.82	78.2564	556.36	1230.59	216.076	628.948	1039.9	-16.7506	639.629	1048.61	296.99	566.307	1012.74	153.418	640.278	671.697	-119.814	364.228	701.657	-106.041	373.396	711.882	-31.3323	278.724	718.843	-53.749	177.246	688.227	-36.803	666.563	672.88	393.724	398.841	699.728	425.155	390.347	709.746	351.859	296.138	720.098	385.118	200.316	691.228	376.429
23	0.22	504.887	1235.08	150.353	549.662	1235.77	78.2576	556.357	1230.57	216.065	628.96	1039.87	-16.7648	639.612	1048.6	296.975	566.319	1012.72	153.393	640.296	671.678	-119.785	364.175	701.64	-106.051	373.388	711.889	-31.3429	278.732	718.839	-53.767	177.317	688.208	-36.856	666.541	672.85	393.702	398.778	699.709	425.151	390.322	709.748	351.838	296.129	720.105	385.084	200.544	691.051	376.397
24	0.23	504.83	1235.07	150.339	549.531	1235.77	78.2627	556.298	1230.56	216.072	628.969	1039.84	-16.7763	639.607	1048.6	296.959	566.319	1012.7	153.364	640.303	671.648	-119.758	364.177	701.644	-106.06	373.38	711.888	-31.3489	278.714	718.854	-53.7831	177.28	688.239	-36.8699	666.556	672.844	393.658	398.782	699.702	425.146	390.272	709.783	351.834	296.155	720.101	385.061	201.041	690.696	376.366
25	0.24	504.802	1235.1	150.367	549.43	1235.79	78.2977	556.24	1230.58	216.089	628.976	1039.81	-16.7923	639.607	1048.59	296.949	566.289	1012.65	153.353	640.347	671.631	-119.71	364.213	701.655	-106.045	373.399	711.879	-31.3478	278.761	718.845	-53.8056	177.262	688.27	-36.8482	666.591	672.851	393.606	398.823	699.721	425.133	390.231	709.802	351.853	296.169	720.107	385.067	200.758	690.923	376.38
26	0.25	504.73	1235.2	150.397	549.335	1235.85	78.3178	556.2	1230.63	216.116	628.984	1039.8	-16.7998	639.591	1048.59	296.942	566.219	1012.63	153.34	640.38	671.599	-119.687	364.237	701.655	-106.056	373.408	711.878	-31.3504	278.775	718.838	-53.8207	177.277	688.265	-36.8514	666.583	672.835	393.569	398.809	699.729	425.127	390.188	709.802	351.849	296.183	720.114	385.049	201.562	690.361	376.351
27	0.26	504.668	1235.31	150.418	549.242	1235.93	78.3413	556.167	1230.68	216.116	628.881	1039.78	-16.8105	639.531	1048.57	296.94	566.192	1012.56	153.331	640.395	671.565	-119.653	364.252	701.646	-106.049	373.408	711.871	-31.3485	278.76	718.848	-53.8178	177.296	688.252	-36.872	666.572	672.789	393.539	398.811	699.716	425.127	390.196	709.782	351.847	296.192	720.109	385.043	201.337	690.528	376.367
28	0.27	504.719	1235.43	150.451	549.179	1236.03	78.3777	556.194	1230.76	216.142	628.755	1039.74	-16.7941	639.45	1048.56	296.953	566.143	1012.5	153.362	640.425	671.532	-119.605	364.254	701.634	-106.021	373.396	711.861	-31.3111	278.765	718.835	-53.7884	177.311	688.234	-36.8731	666.594	672.779	393.522	398.867	699.703	425.158	390.18	709.792	351.846	296.198	720.079	385.068	200.867	690.868	376.402
29	0.28	504.743	1235.57	150.486	549.165	1236.11	78.4155	556.274	1230.85	216.176	628.665	1039.72	-16.7925	639.367	1048.54	296.969	566.134	1012.44	153.38	640.442	671.508	-119.563	364.268	701.615	-105.995	373.415	711.842	-31.277	278.801	718.815	-53.7701	177.332	688.213	-36.8625	666.583	672.763	393.513	398.888	699.672	425.168	390.294	709.75	351.846	296.246	720.051	385.113	201.216	690.627	376.41
30	0.29	504.721	1235.73	150.492	549.141	1236.23	78.4227	556.364	1230.98	216.179	628.523	1039.69	-16.8228	639.261	1048.53	296.957	566.053	1012.38	153.386	640.477	671.504	-119.538	364.274	701.598	-105.985	373.417	711.826	-31.2706	278.815	718.807	-53.7824	177.354	688.195	-36.8602	666.569	672.765	393.504	398.882	699.655	425.146	390.439	709.664	351.845	296.248	720.035	385.104	200.845	690.871	376.42
31	0.3	504.65	1235.92	150.488	549.098	1236.37	78.415	556.401	1231.09	216.177	628.364	1039.7	-16.839	639.125	1048.52	296.945	565.867	1012.39	153.413	640.474	671.488	-119.545	364.262	701.601	-105.999	373.393	711.812	-31.2757	278.776	718.812	-53.7864	177.36	688.18	-36.8879	666.562	672.774	393.487	398.836	699.65	425.126	390.473	709.616	351.829	296.202	720.039	385.096	201.137	690.617	376.393
32	0.31	504.642	1236.09	150.478	549.092	1236.51	78.4159	556.352	1231.22	216.187	628.19	1039.71	-16.8315	639.002	1048.54	296.955	565.759	1012.41	153.404	640.481	671.504	-119.551	364.264	701.614	-106.004	373.371	711.809	-31.2795	278.758	718.817	-53.7781	177.303	688.187	-36.8743	666.571	672.817	393.477	398.804	699.654	425.125	390.274	709.726	351.837	296.184	720.057	385.092	200.352	691.177	376.416
33	0.32	504.653	1236.24	150.462	549.123	1236.64	78.4123	556.284	1231.37	216.159	628.04	1039.71	-16.7925	638.932	1048.55	296.959	565.69	1012.42	153.369	640.468	671.539	-119.539	364.286	701.609	-106.009	373.394	711.823	-31.2876	278.755	718.836	-53.7844	177.276	688.207	-36.8402	666.614	672.861	393.492	398.835	699.677	425.125	390.2	709.756	351.842	296.173	720.085	385.088	200.15	691.337	376.413
34	0.33	504.583	1236.43	150.44	549.123	1236.76	78.4166	556.29	1231.47	216.158	627.913	1039.73	-16.7883	638.836	1048.56	296.942	565.59	1012.44	153.333	640.461	671.566	-119.54	364.272	701.616	-106.026	373.381	711.85	-31.3142	278.717	718.858	-53.7894	177.263	688.221	-36.8462	666.519	672.854	393.52	398.798	699.708	425.117	390.176	709.795	351.835	296.161	720.103	385.075	200.078	691.389	376.39
35	0.34	504.545	1236.59	150.44	549.115	1236.86	78.4051	556.273	1231.58	216.159	627.794	1039.77	-16.7955	638.724	1048.58	296.95	565.504	1012.46	153.324	640.433	671.59	-119.583	364.225	701.639	-106.036	373.355	711.88	-31.3233	278.659	718.874	-53.7865	177.195	688.243	-36.8386	666.49	672.86	393.541	398.779	699.721	425.12	390.208	709.805	351.818	296.128	720.127	385.072	200.013	691.415	376.39
36	0.35	504.599	1236.69	150.434	549.133	1236.93	78.4078	556.271	1231.63	216.157	627.701	1039.78	-16.7885	638.638	1048.58	296.968	565.379	1012.49	153.35	640.395	671.612	-119.613	364.213	701.659	-106.045	373.366	711.898	-31.3438	278.653	718.886	-53.7776	177.198	688.251	-36.8626	666.479	672.87	393.589	398.756	699.733	425.118	390.29	709.769	351.826	296.099	720.151	385.091	199.997	691.429	376.39
37	0.36	504.651	1236.73	150.446	549.198	1236.96	78.3982	556.29	1231.68	216.163	627.615	1039.82	-16.7733	638.597	1048.57	296.994	565.364	1012.49	153.39	640.377	671.65	-119.655	364.23	701.657	-106.032	373.369	711.899	-31.3365	278.695	718.871	-53.7686	177.235	688.25	-36.832	666.446	672.866	393.655	398.789	699.745	425.136	390.339	709.771	351.872	296.137	720.142	385.11	200.456	691.108	376.381
38	0.37	504.602	1236.73	150.428	549.189	1236.96	78.3792	556.257	1231.71	216.156	627.57	1039.84	-16.7691	638.544	1048.54	296.996	565.399	1012.45	153.383	640.329	671.659	-119.714	364.192	701.641	-106.031	373.356	711.9	-31.3247	278.7	718.865	-53.7687	177.2	688.229	-36.8149	666.501	672.89	393.701	398.77	699.729	425.136	390.315	709.755	351.878	296.147	720.109	385.112	201.443	690.387	376.359
39	0.38	504.588	1236.69	150.366	549.181	1236.94	78.3276	556.16	1231.71	216.131	627.48	1039.81	-16.7685	638.495	1048.5	296.986	565.442	1012.4	153.346	640.249	671.649	-119.784	364.173	701.621	-106.054	373.31	711.883	-31.3379	278.719	718.839	-53.7947	177.197	688.218	-36.8347	666.504	672.868	393.708	398.727	699.698	425.132	390.281	709.723	351.855	296.104	720.096	385.104	201.665	690.169	376.336
40	0.39	504.672	1236.65	150.3	549.22	1236.9	78.2748	556.143	1231.73	216.101	627.497	1039.8	-16.7511	638.489	1048.47	296.982	565.536	1012.33	153.325	640.227	671.668	-119.819	364.181	701.601	-106.05	373.322	711.867	-31.3551	278.761	718.807	-53.8202	177.24	688.198	-36.8677	666.51	672.845	393.748	398.718	699.679	425.154	390.261	709.701	351.866	296.142	720.052	385.117	201.728	690.096	376.319
41	0.4	504.71	1236.66	150.267	549.26	1236.88	78.2458	556.177	1231.74	216.084	627.586	1039.82	-16.7421	638.532	1048.45	296.999	565.655	1012.28	153.335	640.206	671.681	-119.854	364.18	701.581	-106.05	373.351	711.841	-31.3501	278.75	718.786	-53.7984	177.275	688.16	-36.8592	666.523	672.846	393.788	398.764	699.678	425.176	390.326	709.68	351.879	296.195	720.038	385.119	201.778	690.075	376.327
42	0.41	504.624	1236.7	150.251	549.255	1236.9	78.2178	556.115	1231.76	216.054	627.613	1039.83	-16.7318	638.555	1048.45	296.999	565.608	1012.32	153.366	640.198	671.7	-119.899	364.187	701.588	-106.07	373.377	711.836	-31.3572	278.721	718.798	-53.7768	177.288	688.147	-36.8349	666.53	672.828	393.795	398.767	699.701	425.174	390.265	709.698	351.882	296.173	720.049	385.106	201.756	690.094	376.334
43	0.42	504.547	1236.72	150.225	549.257	1236.92	78.1804	556.071	1231.8	216.002	627.652	1039.84	-16.7281	638.601	1048.47	296.993	565.546	1012.37	153.376	640.147	671.706	-119.94	364.163	701.621	-106.08	373.413	711.868	-31.3939	278.709	718.822	-53.7836	177.27	688.19	-36.8417	666.483	672.807	393.792	398.753	699.717	425.169	390.174	709.748	351.873	296.14	720.078	385.099	201.317	690.435	376.338
44	0.43	504.501	1236.76	150.192	549.232	1236.94	78.1681	556.021	1231.81	215.997	627.737	1039.86	-16.734	638.686	1048.49	297.011	565.567	1012.42	153.396	640.104	671.696	-119.946	364.168	701.654	-106.084	373.458	711.902	-31.4059	278.704	718.866	-53.7798	177.222	688.239	-36.8379	666.462	672.814	393.763	398.785	699.724	425.176	390.172	709.774	351.866	296.137	720.117	385.088	200.366	691.163	376.39
45	0.44	504.46	1236.81	150.194	549.196	1236.96	78.1819	555.938	1231.84	215.983	627.837	1039.88	-16.7152	638.738	1048.51	297.041	565.495	1012.5	153.454	640.122	671.708	-119.94	364.195	701.675	-106.079	373.44	711.932	-31.3876	278.683	718.904	-53.7435	177.259	688.253	-36.8196	666.463	672.801	393.735	398.82	699.733	425.173	390.2	709.778	351.892	296.096	720.158	385.104	200.105	691.38	376.422
46	0.45	504.362	1236.83	150.186	549.132	1236.97	78.1897	555.869	1231.84	215.967	627.872	1039.87	-16.699	638.749	1048.51	297.049	565.47	1012.52	153.455	640.182	671.71	-119.909	364.179	701.685	-106.068	373.422	711.929	-31.375	278.658	718.912	-53.7276	177.263	688.26	-36.819	666.523	672.801	393.705	398.811	699.724	425.167	390.158	709.801	351.885	296.047	720.181	385.099	200.022	691.438	376.428
47	0.46	504.296	1236.82	150.146	549.111	1236.95	78.1474	555.844	1231.81	215.925	627.848	1039.85	-16.7125	638.77	1048.49	297.038	565.525	1012.47	153.441	640.205	671.7	-119.887	364.173	701.673	-106.087	373.399	711.915	-31.3774	278.67	718.886	-53.7502	177.232	688.254	-36.8386	666.481	672.759	393.628	398.791	699.699	425.139	390.167	709.822	351.877	296.075	720.17	385.085	200.45	691.14	376.393
48	0.47	504.318	1236.74	150.11	549.151	1236.88	78.1022	555.839	1231.77	215.92	627.857	1039.83	-16.6985	638.787	1048.46	297.038	565.649	1012.38	153.426	640.213	671.679	-119.849	364.178	701.633	-106.086	373.375	711.889	-31.3711	278.718	718.835	-53.8021	177.27	688.211	-36.8781	666.488	672.737	393.585	398.811	699.675	425.132	390.188	709.777	351.867	296.136	720.109	385.072	201.031	690.704	376.36
49	0.48	504.365	1236.66	150.12	549.198	1236.82	78.0965	555.863	1231.74	215.941	627.947	1039.82	-16.6929	638.838	1048.43	297.049	565.791	1012.3	153.405	640.316	671.659	-119.769	364.219	701.611	-106.073	373.392	711.848	-31.3444	278.789	718.793	-53.829	177.332	688.162	-36.8951	666.594	672.734	393.556	398.801	699.657	425.125	390.204	709.756	351.872	296.177	720.068	385.067	200.346	691.163	376.391
50	0.49	504.417	1236.62	150.14	549.206	1236.8	78.0932	555.899	1231.75	215.958	628.028	1039.8	-16.7028	638.866	1048.42	297.044	565.892	1012.26	153.382	640.386	671.648	-119.687	364.242	701.6	-106.068	373.378	711.821	-31.3188	278.807	718.772	-53.834	177.321	688.148	-36.8922	666.626	672.723	393.494	398.797	699.664	425.113	390.248	709.711	351.858	296.207	720.053	385.052	200.593	690.961	376.377
51	0.5	504.445	1236.63	150.149	549.158	1236.82	78.1099	555.917	1231.74	215.962	628.033	1039.79	-16.6972	638.862	1048.43	297.034	565.892	1012.28	153.376	640.381	671.618	-119.644	364.261	701.611	-106.056	373.367	711.82	-31.3083	278.783	718.789	-53.8252	177.304	688.152	-36.9	666.58	672.697	393.455	398.796	699.676	425.115	390.179	709.755	351.849	296.182	720.047	385.053	201.504	690.315	376.327
52	0.51	504.451	1236.66	150.195	549.125	1236.85	78.1499	555.957	1231.74	215.985	628.079	1039.8	-16.6865	638.906	1048.46	297.05	565.854	1012.34	153.415	640.404	671.603	-119.615	364.274	701.633	-106.022	373.349	711.83	-31.3041	278.756	718.828	-53.7947	177.312	688.183	-36.8959	666.581	672.702	393.425	398.81	699.67	425.124	390.227	709.763	351.822	296.167	720.053	385.08	201.747	690.172	376.337
53	0.52	504.448	1236.7	150.254	549.187	1236.87	78.1855	555.998	1231.78	216.008	628.128	1039.79	-16.6642	638.942	1048.5	297.069	565.839	1012.39	153.453	640.473	671.61	-119.544	364.275	701.651	-105.995	373.387	711.851	-31.2842	278.765	718.851	-53.7637	177.317	688.194	-36.8673	666.639	672.742	393.429	398.836	699.68	425.126	390.339	709.719	351.83	296.21	720.082	385.095	201.394	690.48	376.374
54	0.53	504.436	1236.75	150.279	549.173	1236.9	78.2213	556.041	1231.8	216.023	628.143	1039.77	-16.6654	638.964	1048.52	297.065	565.822	1012.43	153.463	640.534	671.592	-119.496	364.286	701.651	-105.992	373.42	711.866	-31.2797	278.747	718.876	-53.7458	177.319	688.235	-36.8484	666.62	672.743	393.434	398.842	699.669	425.117	390.326	709.708	351.829	296.222	720.112	385.099	200.45	691.195	376.418
55	0.54	504.4	1236.8	150.305	549.133	1236.94	78.2522	556.069	1231.82	216.025	628.137	1039.74	-16.6956	638.949	1048.53	297.059	565.749	1012.48	153.466	640.551	671.573	-119.494	364.25	701.65	-106.002	373.397	711.874	-31.2836	278.703	718.895	-53.7404	177.238	688.246	-36.8224	666.561	672.744	393.432	398.807	699.68	425.123	390.37	709.693	351.838	296.165	720.139	385.109	200.16	691.379	376.428
56	0.55	504.422	1236.86	150.341	549.1	1236.98	78.2913	556.082	1231.84	216.039	628.152	1039.74	-16.7094	638.942	1048.54	297.064	565.721	1012.48	153.462	640.521	671.557	-119.478	364.25	701.662	-105.989	373.363	711.861	-31.2821	278.68	718.903	-53.7283	177.199	688.259	-36.8205	666.502	672.741	393.444	398.743	699.682	425.129	390.312	709.726	351.838	296.139	720.147	385.116	200.063	691.43	376.421
57	0.56	504.483	1236.86	150.368	549.135	1237	78.3226	556.13	1231.89	216.053	628.195	1039.74	-16.7048	638.952	1048.53	297.059	565.824	1012.42	153.427	640.567	671.566	-119.438	364.265	701.658	-105.981	373.394	711.842	-31.2757	278.704	718.883	-53.749	177.217	688.245	-36.8335	666.502	672.745	393.514	398.791	699.698	425.145	390.259	709.757	351.856	296.156	720.125	385.101	200.488	691.111	376.399
58	0.57	504.532	1236.86	150.368	549.186	1237.02	78.3254	556.18	1231.92	216.06	628.219	1039.74	-16.7196	638.945	1048.51	297.029	565.921	1012.34	153.377	640.592	671.569	-119.423	364.263	701.64	-105.984	373.393	711.831	-31.2876	278.742	718.848	-53.7832	177.294	688.234	-36.8764	666.538	672.78	393.584	398.799	699.707	425.154	390.181	709.756	351.85	296.154	720.109	385.064	201.43	690.397	376.343
59	0.58	504.583	1236.9	150.401	549.217	1237.04	78.3037	556.216	1231.96	216.062	628.249	1039.73	-16.7412	638.928	1048.48	297.002	565.991	1012.27	153.326	640.554	671.55	-119.454	364.255	701.635	-106.014	373.34	711.838	-31.3069	278.752	718.809	-53.8224	177.32	688.188	-36.9324	666.493	672.773	393.607	398.796	699.706	425.149	390.218	709.769	351.838	296.142	720.112	385.047	201.669	690.199	376.312
60	0.59	504.68	1236.95	150.437	549.225	1237.08	78.3236	556.289	1232.02	216.092	628.28	1039.71	-16.7382	638.907	1048.47	296.998	566.038	1012.22	153.309	640.531	671.531	-119.471	364.271	701.636	-106.025	373.335	711.823	-31.3093	278.791	718.777	-53.8524	177.361	688.159	-36.9584	666.517	672.76	393.62	398.837	699.701	425.139	390.243	709.775	351.869	296.17	720.074	385.058	201.761	690.124	376.308
61	0.6	504.726	1237.03	150.463	549.279	1237.14	78.3674	556.35	1232.04	216.108	628.326	1039.73	-16.7299	638.905	1048.47	297.019	566.022	1012.23	153.329	640.555	671.535	-119.456	364.323	701.625	-106.007	373.355	711.817	-31.303	278.813	718.789	-53.8475	177.374	688.171	-36.9419	666.559	672.765	393.658	398.825	699.698	425.138	390.175	709.787	351.886	296.188	720.057	385.075	201.804	690.111	376.317
62	0.61	504.685	1237.16	150.505	549.321	1237.22	78.4151	556.365	1232.09	216.123	628.313	1039.72	-16.7305	638.883	1048.48	297.037	565.951	1012.26	153.358	640.56	671.534	-119.472	364.299	701.627	-106.011	373.385	711.847	-31.2987	278.794	718.812	-53.8246	177.318	688.202	-36.8952	666.561	672.772	393.702	398.802	699.693	425.145	390.168	709.782	351.887	296.198	720.064	385.071	201.811	690.123	376.324
63	0.62	504.549	1237.38	150.568	549.253	1237.31	78.448	556.416	1232.12	216.118	628.246	1039.71	-16.7617	638.852	1048.5	297.039	565.822	1012.34	153.404	640.515	671.524	-119.519	364.263	701.638	-106.015	373.382	711.89	-31.3115	278.739	718.843	-53.7932	177.237	688.256	-36.8567	666.546	672.777	393.698	398.78	699.685	425.138	390.301	709.722	351.858	296.175	720.09	385.079	201.803	690.144	376.345
64	0.63	504.434	1237.6	150.664	549.206	1237.39	78.4958	556.417	1232.16	216.104	628.206	1039.72	-16.7632	638.833	1048.52	297.053	565.756	1012.38	153.441	640.465	671.522	-119.55	364.267	701.641	-106.013	373.38	711.885	-31.3154	278.704	718.875	-53.7575	177.229	688.268	-36.8268	666.542	672.782	393.703	398.777	699.666	425.147	390.263	709.73	351.853	296.173	720.114	385.108	201.372	690.48	376.378
65	0.64	504.471	1237.72	150.702	549.237	1237.44	78.5477	556.416	1232.2	216.108	628.133	1039.7	-16.7199	638.827	1048.52	297.073	565.768	1012.37	153.459	640.478	671.553	-119.54	364.237	701.632	-105.985	373.406	711.89	-31.308	278.703	718.886	-53.7361	177.257	688.259	-36.8132	666.527	672.791	393.725	398.759	699.667	425.157	390.258	709.721	351.884	296.146	720.123	385.13	200.391	691.195	376.425
66	0.65	504.54	1237.73	150.7	549.307	1237.47	78.5496	556.418	1232.26	216.105	628.099	1039.72	-16.7024	638.812	1048.51	297.068	565.776	1012.35	153.442	640.474	671.568	-119.575	364.228	701.636	-105.978	373.422	711.88	-31.3025	278.714	718.876	-53.7469	177.259	688.248	-36.8155	666.525	672.806	393.721	398.748	699.674	425.155	390.15	709.755	351.907	296.116	720.123	385.116	200.115	691.382	376.43
67	0.66	504.619	1237.7	150.667	549.372	1237.48	78.5132	556.427	1232.31	216.106	628.046	1039.74	-16.7183	638.795	1048.49	297.053	565.859	1012.28	153.392	640.416	671.575	-119.613	364.231	701.637	-106.009	373.39	711.851	-31.3077	278.742	718.841	-53.7923	177.309	688.232	-36.8666	666.463	672.784	393.695	398.742	699.68	425.153	390.192	709.758	351.881	296.118	720.119	385.07	200.069	691.401	376.403
68	0.67	504.643	1237.68	150.648	549.459	1237.47	78.4809	556.444	1232.36	216.105	628.032	1039.76	-16.7179	638.8	1048.47	297.035	566.039	1012.18	153.346	640.409	671.589	-119.611	364.283	701.616	-106.048	373.372	711.833	-31.3104	278.789	718.802	-53.8377	177.332	688.188	-36.9052	666.497	672.815	393.672	398.765	699.696	425.155	390.221	709.759	351.844	296.129	720.098	385.063	200.075	691.366	376.374
69	0.68	504.689	1237.69	150.655	549.517	1237.5	78.4852	556.43	1232.39	216.102	628.027	1039.75	-16.706	638.82	1048.46	297.025	566.074	1012.17	153.319	640.46	671.621	-119.593	364.31	701.617	-106.069	373.403	711.829	-31.3144	278.819	718.792	-53.8501	177.359	688.174	-36.9418	666.529	672.827	393.654	398.787	699.706	425.15	390.185	709.784	351.827	296.112	720.1	385.064	200.053	691.358	376.36
70	0.69	504.678	1237.82	150.678	549.487	1237.57	78.5134	556.451	1232.42	216.092	628.006	1039.77	-16.6895	638.81	1048.46	297.038	565.984	1012.22	153.33	640.449	671.635	-119.602	364.272	701.628	-106.045	373.386	711.852	-31.3106	278.786	718.816	-53.8172	177.308	688.195	-36.9184	666.529	672.802	393.622	398.77	699.709	425.139	390.097	709.806	351.849	296.134	720.099	385.063	200.472	691.063	376.356
71	0.7	504.595	1237.97	150.727	549.432	1237.63	78.5396	556.471	1232.44	216.099	627.987	1039.78	-16.7088	638.804	1048.48	297.04	565.842	1012.3	153.372	640.399	671.607	-119.625	364.225	701.64	-106.021	373.357	711.872	-31.3214	278.715	718.851	-53.778	177.214	688.242	-36.8409	666.489	672.749	393.574	398.788	699.706	425.134	390.179	709.754	351.842	296.127	720.113	385.077	201.428	690.386	376.336
72	0.71	504.572	1238.05	150.74	549.414	1237.68	78.5747	556.447	1232.47	216.105	627.994	1039.77	-16.73	638.804	1048.49	297.03	565.814	1012.32	153.403	640.341	671.587	-119.65	364.204	701.643	-106.021	373.367	711.873	-31.3172	278.69	718.861	-53.7619	177.201	688.252	-36.8374	666.448	672.694	393.542	398.767	699.679	425.117	390.16	709.746	351.829	296.106	720.118	385.106	201.692	690.217	376.345
73	0.72	504.609	1238.09	150.738	549.442	1237.7	78.6003	556.457	1232.51	216.098	627.98	1039.73	-16.714	638.812	1048.48	297.035	565.816	1012.31	153.395	640.368	671.593	-119.63	364.219	701.644	-106.034	373.376	711.858	-31.315	278.701	718.854	-53.7631	177.228	688.227	-36.8439	666.498	672.703	393.524	398.769	699.679	425.116	390.095	709.749	351.842	296.138	720.096	385.108	201.753	690.181	376.353
74	0.73	504.577	1238.1	150.767	549.454	1237.72	78.6199	556.469	1232.5	216.089	628.004	1039.74	-16.712	638.84	1048.47	297.04	565.79	1012.3	153.391	640.431	671.6	-119.607	364.23	701.629	-106.035	373.404	711.856	-31.3189	278.724	718.841	-53.7672	177.284	688.212	-36.857	666.563	672.719	393.502	398.785	699.672	425.131	390.168	709.748	351.86	296.211	720.078	385.11	201.781	690.167	376.354
75	0.74	504.58	1238.12	150.787	549.451	1237.73	78.6306	556.493	1232.51	216.087	628.047	1039.73	-16.724	638.858	1048.47	297.04	565.799	1012.32	153.415	640.392	671.574	-119.621	364.242	701.628	-106.028	373.41	711.875	-31.3261	278.727	718.839	-53.7729	177.277	688.226	-36.877	666.552	672.713	393.486	398.816	699.662	425.123	390.243	709.743	351.847	296.223	720.083	385.103	201.363	690.463	376.371
76	0.75	504.602	1238.16	150.808	549.442	1237.75	78.6324	556.497	1232.54	216.086	628.036	1039.73	-16.727	638.878	1048.48	297.062	565.819	1012.34	153.427	640.377	671.559	-119.638	364.266	701.638	-106.033	373.387	711.88	-31.3373	278.727	718.853	-53.7807	177.289	688.227	-36.8905	666.542	672.709	393.457	398.853	699.679	425.113	390.295	709.708	351.836	296.176	720.097	385.087	200.408	691.171	376.406
77	0.76	504.566	1238.2	150.828	549.456	1237.77	78.6399	556.505	1232.57	216.085	628.031	1039.74	-16.7033	638.908	1048.5	297.092	565.823	1012.36	153.431	640.419	671.58	-119.622	364.265	701.643	-106.034	373.435	711.877	-31.3446	278.726	718.849	-53.767	177.353	688.231	-36.9039	666.591	672.747	393.466	398.831	699.689	425.119	390.333	709.672	351.82	296.156	720.119	385.074	200.589	691.034	376.398
78	0.77	504.562	1238.23	150.856	549.483	1237.78	78.6716	556.466	1232.58	216.1	628.072	1039.74	-16.7039	638.916	1048.5	297.103	565.863	1012.36	153.426	640.423	671.592	-119.614	364.255	701.637	-106.019	373.432	711.875	-31.3224	278.731	718.841	-53.7678	177.354	688.218	-36.881	666.598	672.776	393.452	398.799	699.686	425.104	390.213	709.713	351.828	296.124	720.134	385.074	201.052	690.703	376.386
79	0.78	504.629	1238.22	150.871	549.46	1237.79	78.6782	556.426	1232.57	216.115	628.117	1039.74	-16.7168	638.908	1048.5	297.107	565.869	1012.36	153.409	640.437	671.607	-119.595	364.226	701.634	-106.02	373.397	711.863	-31.3149	278.732	718.841	-53.7738	177.33	688.214	-36.8828	666.532	672.759	393.462	398.799	699.676	425.107	390.137	709.754	351.83	296.128	720.127	385.073	200.285	691.237	376.408
80	0.79	504.677	1238.2	150.894	549.474	1237.76	78.6728	556.5	1232.58	216.115	628.131	1039.73	-16.7316	638.909	1048.49	297.096	565.886	1012.34	153.409	640.459	671.628	-119.565	364.229	701.621	-106.026	373.386	711.841	-31.3232	278.746	718.825	-53.7903	177.293	688.191	-36.878	666.527	672.754	393.481	398.795	699.686	425.116	390.187	709.746	351.841	296.141	720.103	385.073	200.562	691.039	376.382
81	0.8	504.685	1238.18	150.906	549.481	1237.76	78.6898	556.538	1232.6	216.123	628.169	1039.75	-16.7336	638.916	1048.48	297.08	565.933	1012.32	153.397	640.495	671.643	-119.543	364.254	701.614	-106.022	373.367	711.836	-31.3067	278.778	718.805	-53.813	177.322	688.151	-36.9156	666.525	672.738	393.504	398.779	699.677	425.124	390.205	709.727	351.846	296.16	720.092	385.064	201.077	690.664	376.345
82	0.81	504.663	1238.23	150.927	549.476	1237.78	78.7073	556.532	1232.6	216.139	628.246	1039.8	-16.737	638.912	1048.47	297.087	565.953	1012.33	153.389	640.51	671.65	-119.52	364.273	701.627	-106.013	373.376	711.842	-31.2931	278.776	718.803	-53.809	177.31	688.18	-36.8982	666.52	672.727	393.543	398.777	699.676	425.122	390.217	709.716	351.838	296.194	720.087	385.047	200.777	690.867	376.362
83	0.82	504.638	1238.3	150.94	549.45	1237.81	78.7296	556.541	1232.61	216.141	628.317	1039.82	-16.7349	638.913	1048.49	297.104	565.9	1012.39	153.404	640.528	671.667	-119.5	364.245	701.652	-106.016	373.376	711.874	-31.2906	278.728	718.83	-53.7849	177.303	688.221	-36.8838	666.478	672.704	393.57	398.763	699.686	425.121	390.263	709.731	351.846	296.178	720.085	385.077	201.547	690.318	376.354
84	0.83	504.597	1238.34	150.933	549.452	1237.85	78.7546	556.567	1232.64	216.141	628.363	1039.83	-16.7507	638.935	1048.5	297.102	565.852	1012.45	153.4	640.523	671.654	-119.497	364.255	701.672	-106.042	373.378	711.889	-31.2992	278.723	718.856	-53.7747	177.271	688.264	-36.8604	666.47	672.713	393.607	398.779	699.695	425.125	390.263	709.768	351.847	296.131	720.118	385.086	201.718	690.195	376.351
85	0.84	504.557	1238.39	150.938	549.5	1237.89	78.766	556.587	1232.65	216.135	628.407	1039.85	-16.7686	638.969	1048.51	297.099	565.86	1012.48	153.394	640.527	671.657	-119.488	364.259	701.678	-106.033	373.403	711.884	-31.3148	278.736	718.868	-53.7781	177.277	688.282	-36.8716	666.475	672.723	393.633	398.806	699.717	425.139	390.316	709.754	351.838	296.131	720.124	385.078	201.749	690.179	376.356
86	0.85	504.592	1238.4	150.94	549.56	1237.9	78.7683	556.582	1232.65	216.119	628.473	1039.86	-16.7602	638.994	1048.5	297.1	565.87	1012.51	153.402	640.511	671.651	-119.488	364.244	701.671	-105.997	373.421	711.89	-31.3151	278.748	718.869	-53.7847	177.327	688.27	-36.8971	666.49	672.732	393.645	398.78	699.724	425.152	390.232	709.754	351.855	296.152	720.121	385.093	201.331	690.49	376.36
87	0.86	504.634	1238.38	150.97	549.587	1237.9	78.7662	556.582	1232.62	216.143	628.503	1039.85	-16.7609	639.007	1048.48	297.097	565.941	1012.5	153.427	640.458	671.625	-119.503	364.233	701.675	-106.003	373.387	711.894	-31.2964	278.725	718.869	-53.7751	177.299	688.265	-36.9056	666.448	672.719	393.651	398.794	699.713	425.149	390.111	709.775	351.872	296.135	720.134	385.093	200.814	690.874	376.376
88	0.87	504.695	1238.36	150.962	549.581	1237.9	78.7783	556.494	1232.62	216.182	628.515	1039.83	-16.7771	639.022	1048.47	297.09	565.987	1012.46	153.419	640.468	671.641	-119.514	364.23	701.665	-106.006	373.371	711.877	-31.2869	278.743	718.842	-53.7889	177.274	688.249	-36.9023	666.413	672.708	393.64	398.781	699.687	425.139	390.139	709.743	351.849	296.135	720.131	385.08	201.095	690.646	376.371
89	0.88	504.75	1238.33	150.949	549.654	1237.9	78.775	556.4	1232.61	216.213	628.519	1039.79	-16.752	639.055	1048.46	297.092	566.062	1012.44	153.395	640.505	671.652	-119.511	364.258	701.636	-106.007	373.388	711.846	-31.2941	278.768	718.824	-53.8152	177.333	688.2	-36.9189	666.423	672.706	393.641	398.735	699.677	425.14	390.236	709.681	351.843	296.125	720.108	385.082	200.283	691.205	376.394
90	0.89	504.781	1238.34	150.974	549.725	1237.91	78.777	556.485	1232.62	216.204	628.567	1039.79	-16.7443	639.079	1048.45	297.095	566.112	1012.4	153.385	640.493	671.641	-119.502	364.312	701.601	-106.012	373.409	711.832	-31.3049	278.765	718.813	-53.8087	177.336	688.19	-36.9039	666.44	672.713	393.646	398.721	699.686	425.132	390.3	709.681	351.871	296.087	720.12	385.084	200.073	691.338	376.399
91	0.9	504.767	1238.4	151.013	549.742	1237.94	78.7947	556.495	1232.63	216.225	628.61	1039.79	-16.7632	639.098	1048.45	297.098	566.104	1012.43	153.412	640.432	671.618	-119.509	364.283	701.617	-106.019	373.377	711.834	-31.292	278.77	718.816	-53.7991	177.282	688.209	-36.8802	666.437	672.67	393.623	398.753	699.684	425.118	390.211	709.722	351.876	296.096	720.119	385.09	200.037	691.362	376.407
92	0.91	504.776	1238.47	151.005	549.822	1237.98	78.7911	556.67	1232.65	216.177	628.646	1039.79	-16.7741	639.13	1048.45	297.094	566.072	1012.45	153.414	640.435	671.604	-119.525	364.269	701.626	-106.027	373.372	711.851	-31.3076	278.777	718.817	-53.8059	177.304	688.219	-36.8886	666.495	672.659	393.546	398.782	699.679	425.116	390.233	709.732	351.844	296.136	720.116	385.083	200.03	691.374	376.396
93	0.92	504.84	1238.53	150.97	549.9	1238.02	78.7818	556.758	1232.66	216.168	628.682	1039.8	-16.7776	639.166	1048.46	297.088	566.176	1012.45	153.376	640.492	671.612	-119.508	364.299	701.642	-106.06	373.409	711.863	-31.322	278.803	718.811	-53.8473	177.341	688.23	-36.9346	666.544	672.669	393.49	398.793	699.675	425.12	390.248	709.75	351.822	296.19	720.096	385.061	200.493	691.055	376.355
94	0.93	504.901	1238.58	150.976	549.964	1238.07	78.7852	556.828	1232.65	216.185	628.736	1039.81	-16.7874	639.191	1048.46	297.1	566.235	1012.49	153.36	640.52	671.613	-119.493	364.285	701.656	-106.05	373.419	711.876	-31.3166	278.769	718.836	-53.8376	177.352	688.227	-36.9411	666.53	672.634	393.462	398.806	699.674	425.128	390.136	709.789	351.829	296.208	720.1	385.056	201.483	690.373	376.337
95	0.94	504.878	1238.64	151.001	549.998	1238.13	78.8208	556.821	1232.66	216.189	628.74	1039.83	-16.8004	639.223	1048.47	297.113	566.178	1012.56	153.391	640.531	671.613	-119.465	364.254	701.676	-106.028	373.397	711.893	-31.3134	278.738	718.861	-53.8116	177.307	688.246	-36.9091	666.512	672.608	393.425	398.838	699.677	425.11	390.151	709.787	351.835	296.193	720.12	385.07	201.737	690.223	376.349
96	0.95	504.892	1238.7	151.029	550.045	1238.18	78.847	556.887	1232.67	216.173	628.776	1039.83	-16.823	639.237	1048.48	297.116	566.072	1012.63	153.408	640.562	671.626	-119.444	364.242	701.677	-106.009	373.395	711.905	-31.3221	278.731	718.884	-53.8044	177.284	688.262	-36.8974	666.504	672.581	393.399	398.852	699.676	425.087	390.154	709.772	351.837	296.169	720.112	385.068	201.784	690.192	376.341
97	0.96	504.929	1238.72	151.066	550.092	1238.21	78.8753	556.91	1232.69	216.173	628.811	1039.83	-16.8082	639.241	1048.47	297.125	566.081	1012.66	153.416	640.575	671.626	-119.427	364.276	701.678	-106.013	373.383	711.9	-31.3101	278.717	718.889	-53.7997	177.246	688.254	-36.8874	666.558	672.599	393.368	398.802	699.671	425.091	390.07	709.766	351.822	296.156	720.122	385.065	201.344	690.492	376.36
98	0.97	505.042	1238.73	151.082	550.178	1238.23	78.8919	556.843	1232.73	216.219	628.817	1039.84	-16.7789	639.26	1048.47	297.148	566.142	1012.64	153.425	640.601	671.637	-119.393	364.267	701.67	-106.012	373.371	711.881	-31.3028	278.717	718.87	-53.7871	177.251	688.227	-36.8967	666.551	672.595	393.353	398.764	699.666	425.091	390.106	709.765	351.822	296.121	720.122	385.082	200.788	690.874	376.391
99	0.98	505.135	1238.73	151.102	550.248	1238.26	78.9057	556.765	1232.77	216.281	628.852	1039.85	-16.7682	639.281	1048.47	297.156	566.236	1012.59	153.417	640.596	671.665	-119.383	364.262	701.655	-106.008	373.331	711.854	-31.2825	278.738	718.849	-53.7853	177.287	688.23	-36.9046	666.544	672.607	393.337	398.768	699.66	425.081	390.135	709.763	351.839	296.139	720.119	385.093	201.103	690.635	376.368
100	0.99	505.233	1238.74	151.101	550.386	1238.26	78.8897	556.745	1232.79	216.289	628.893	1039.86	-16.7614	639.321	1048.46	297.154	566.356	1012.56	153.418	640.605	671.674	-119.368	364.261	701.663	-106.014	373.34	711.835	-31.2719	278.765	718.823	-53.8144	177.335	688.208	-36.9257	666.565	672.636	393.316	398.768	699.655	425.086	390.218	709.733	351.835	296.151	720.112	385.077	200.312	691.18	376.377
101	1	505.34	1238.78	151.11	550.495	1238.27	78.8826	556.834	1232.81	216.277	628.904	1039.87	-16.7523	639.351	1048.45	297.167	566.43	1012.54	153.417	640.604	671.687	-119.346	364.293	701.647	-106.011	373.347	711.829	-31.2792	278.789	718.809	-53.8422	177.339	688.191	-36.9258	666.546	672.625	393.302	398.795	699.672	425.111	390.27	709.72	351.802	296.154	720.104	385.076	200.535	691.003	376.364
102	1.01	505.346	1238.83	151.126	550.538	1238.32	78.8978	556.986	1232.83	216.278	628.951	1039.88	-16.7448	639.379	1048.47	297.184	566.396	1012.57	153.427	640.62	671.704	-119.322	364.302	701.645	-106.007	373.373	711.843	-31.2824	278.774	718.815	-53.8335	177.297	688.208	-36.9151	666.515	672.608	393.305	398.788	699.676	425.114	390.298	709.718	351.798	296.121	720.111	385.082	201.016	690.678	376.365
103	1.02	505.332	1238.92	151.161	550.611	1238.4	78.9207	556.922	1232.88	216.315	628.993	1039.87	-16.7475	639.383	1048.49	297.201	566.372	1012.63	153.456	640.652	671.706	-119.307	364.269	701.667	-105.994	373.405	711.854	-31.2734	278.754	718.844	-53.8017	177.287	688.234	-36.9014	666.555	672.619	393.304	398.781	699.678	425.097	390.263	709.737	351.83	296.117	720.123	385.096	200.701	690.924	376.39
104	1.03	505.316	1239.01	151.188	550.682	1238.48	78.9346	556.938	1232.9	216.301	629.037	1039.88	-16.7403	639.389	1048.49	297.213	566.27	1012.69	153.48	640.665	671.702	-119.306	364.249	701.682	-105.98	373.382	711.874	-31.2627	278.699	718.878	-53.7698	177.238	688.258	-36.8694	666.596	672.608	393.299	398.778	699.673	425.09	390.146	709.778	351.832	296.138	720.123	385.094	201.49	690.364	376.361
105	1.04	505.334	1239.07	151.201	550.747	1238.54	78.9479	556.942	1232.9	216.324	629.075	1039.87	-16.7256	639.391	1048.48	297.221	566.278	1012.68	153.482	640.633	671.664	-119.293	364.26	701.685	-105.976	373.375	711.893	-31.2695	278.702	718.877	-53.7798	177.228	688.264	-36.875	666.544	672.55	393.332	398.78	699.652	425.103	390.125	709.773	351.826	296.161	720.108	385.084	201.694	690.214	376.361
106	1.05	505.469	1239.09	151.194	550.856	1238.57	78.9496	557.003	1232.92	216.359	629.109	1039.87	-16.6972	639.405	1048.45	297.229	566.413	1012.61	153.453	640.629	671.647	-119.287	364.282	701.673	-105.972	373.38	711.888	-31.2839	278.761	718.853	-53.8192	177.274	688.231	-36.9171	666.5	672.509	393.36	398.801	699.639	425.099	390.27	709.727	351.824	296.209	720.086	385.083	201.768	690.173	376.359
107	1.06	505.569	1239.09	151.23	551.008	1238.58	78.9434	557.053	1232.95	216.368	629.151	1039.86	-16.7113	639.424	1048.42	297.228	566.552	1012.56	153.441	640.658	671.676	-119.271	364.285	701.677	-105.97	373.394	711.876	-31.2832	278.795	718.828	-53.833	177.343	688.217	-36.9378	666.497	672.507	393.36	398.842	699.64	425.102	390.273	709.722	351.826	296.218	720.078	385.09	201.364	690.471	376.37
108	1.07	505.612	1239.11	151.249	551.1	1238.59	78.9536	557.246	1232.96	216.363	629.211	1039.86	-16.73	639.451	1048.39	297.225	566.596	1012.53	153.457	640.643	671.674	-119.262	364.288	701.67	-105.983	373.408	711.862	-31.2766	278.799	718.815	-53.8261	177.374	688.209	-36.9403	666.501	672.481	393.351	398.862	699.652	425.112	390.231	709.737	351.842	296.19	720.076	385.075	200.819	690.848	376.38
109	1.08	505.607	1239.15	151.248	551.189	1238.59	78.9458	557.436	1232.98	216.336	629.269	1039.87	-16.7204	639.487	1048.38	297.23	566.612	1012.52	153.425	640.63	671.662	-119.257	364.32	701.653	-106.012	373.393	711.849	-31.2816	278.791	718.82	-53.8321	177.387	688.211	-36.9656	666.506	672.479	393.352	398.834	699.657	425.108	390.254	709.714	351.799	296.191	720.09	385.066	201.113	690.628	376.362
110	1.09	505.665	1239.19	151.232	551.244	1238.62	78.955	557.421	1233	216.366	629.3	1039.87	-16.7235	639.496	1048.37	297.214	566.631	1012.52	153.391	640.639	671.66	-119.268	364.308	701.651	-106.035	373.387	711.857	-31.2913	278.797	718.831	-53.8471	177.333	688.224	-36.9597	666.472	672.48	393.372	398.808	699.656	425.104	390.193	709.726	351.789	296.187	720.117	385.049	200.325	691.196	376.364
111	1.1	505.763	1239.21	151.267	551.332	1238.67	78.981	557.481	1233	216.37	629.333	1039.85	-16.719	639.53	1048.38	297.216	566.636	1012.54	153.407	640.664	671.64	-119.279	364.309	701.665	-106.038	373.384	711.859	-31.2953	278.781	718.839	-53.8233	177.303	688.233	-36.937	666.462	672.466	393.347	398.792	699.658	425.095	390.162	709.759	351.803	296.111	720.142	385.06	200.113	691.344	376.384
112	1.11	505.796	1239.26	151.295	551.433	1238.71	78.9975	557.503	1233.02	216.375	629.424	1039.87	-16.7144	639.56	1048.39	297.221	566.615	1012.56	153.435	640.7	671.642	-119.266	364.312	701.664	-106.016	373.392	711.872	-31.2802	278.742	718.855	-53.8009	177.303	688.235	-36.897	666.493	672.468	393.345	398.794	699.655	425.095	390.128	709.773	351.832	296.088	720.136	385.078	200.045	691.404	376.407
113	1.12	505.862	1239.27	151.279	551.51	1238.74	78.9951	557.565	1233.02	216.404	629.489	1039.86	-16.7082	639.602	1048.39	297.232	566.667	1012.56	153.454	640.708	671.647	-119.257	364.298	701.655	-105.993	373.389	711.868	-31.2685	278.754	718.853	-53.8061	177.308	688.228	-36.8941	666.504	672.456	393.333	398.795	699.643	425.092	390.19	709.747	351.85	296.141	720.135	385.074	200.032	691.412	376.413
114	1.13	505.973	1239.26	151.279	551.611	1238.75	78.9882	557.544	1233.01	216.431	629.511	1039.84	-16.7155	639.635	1048.38	297.24	566.797	1012.55	153.439	640.68	671.619	-119.237	364.301	701.646	-105.995	373.383	711.852	-31.2769	278.765	718.843	-53.821	177.304	688.213	-36.908	666.497	672.438	393.311	398.777	699.644	425.102	390.193	709.742	351.834	296.15	720.118	385.073	200.481	691.083	376.405
115	1.14	506.028	1239.25	151.304	551.682	1238.74	78.9923	557.567	1233.02	216.435	629.561	1039.82	-16.7138	639.662	1048.37	297.24	566.832	1012.55	153.438	640.633	671.591	-119.213	364.324	701.644	-105.997	373.378	711.855	-31.2727	278.768	718.839	-53.8274	177.318	688.218	-36.9435	666.483	672.413	393.272	398.764	699.631	425.092	390.132	709.757	351.844	296.186	720.085	385.084	201.445	690.396	376.37
116	1.15	506.044	1239.26	151.318	551.731	1238.76	78.9989	557.755	1233.02	216.371	629.639	1039.82	-16.7161	639.709	1048.37	297.247	566.855	1012.57	153.446	640.682	671.592	-119.18	364.343	701.644	-105.986	373.389	711.874	-31.2687	278.768	718.834	-53.8263	177.292	688.198	-36.9288	666.54	672.417	393.228	398.782	699.64	425.104	390.12	709.761	351.822	296.208	720.074	385.083	201.699	690.214	376.355
117	1.16	506.052	1239.27	151.328	551.811	1238.76	78.9962	557.928	1232.98	216.334	629.693	1039.82	-16.6975	639.769	1048.38	297.254	566.957	1012.59	153.437	640.71	671.555	-119.125	364.34	701.644	-105.978	373.373	711.871	-31.2494	278.769	718.833	-53.825	177.306	688.201	-36.9204	666.531	672.418	393.211	398.843	699.644	425.087	390.269	709.719	351.802	296.2	720.082	385.077	201.796	690.148	376.352
118	1.17	506.054	1239.28	151.321	551.868	1238.74	78.9756	557.86	1233.03	216.389	629.717	1039.82	-16.7169	639.818	1048.4	297.243	567.06	1012.63	153.413	640.666	671.511	-119.073	364.319	701.658	-105.978	373.359	711.852	-31.2585	278.776	718.837	-53.8398	177.287	688.223	-36.9365	666.48	672.391	393.215	398.832	699.647	425.081	390.185	709.754	351.807	296.202	720.093	385.055	201.806	690.148	376.354
119	1.18	506.152	1239.24	151.329	551.926	1238.74	78.9807	557.9	1233.02	216.394	629.764	1039.81	-16.7082	639.873	1048.41	297.233	567.097	1012.67	153.404	640.651	671.511	-119.052	364.333	701.672	-105.975	373.37	711.854	-31.2608	278.777	718.84	-53.8436	177.297	688.216	-36.9605	666.515	672.406	393.203	398.807	699.648	425.083	390.128	709.779	351.804	296.184	720.094	385.062	201.372	690.46	376.352
120	1.19	506.182	1239.21	151.368	551.977	1238.75	78.9807	557.981	1233	216.369	629.835	1039.84	-16.7154	639.953	1048.44	297.239	567.178	1012.71	153.42	640.677	671.527	-119.02	364.328	701.682	-105.972	373.379	711.864	-31.2585	278.769	718.832	-53.8332	177.289	688.227	-36.9478	666.563	672.437	393.175	398.815	699.65	425.066	390.059	709.785	351.806	296.161	720.115	385.075	200.824	690.854	376.368
121	1.2	506.183	1239.22	151.374	551.991	1238.74	78.9983	558.184	1233	216.369	629.881	1039.85	-16.7174	640.021	1048.46	297.254	567.241	1012.77	153.457	640.681	671.548	-118.963	364.336	701.672	-105.973	373.378	711.859	-31.2505	278.772	718.836	-53.8297	177.279	688.208	-36.9288	666.564	672.463	393.184	398.822	699.642	425.051	390.169	709.744	351.815	296.15	720.127	385.076	201.128	690.64	376.371
122	1.21	506.18	1239.21	151.41	552.009	1238.74	79.0161	558.226	1233.01	216.395	629.927	1039.86	-16.7176	640.065	1048.48	297.264	567.254	1012.83	153.474	640.662	671.533	-118.898	364.328	701.652	-105.959	373.356	711.865	-31.2391	278.741	718.854	-53.8151	177.257	688.235	-36.9197	666.5	672.472	393.18	398.822	699.642	425.069	390.207	709.729	351.822	296.146	720.133	385.085	200.735	690.9	376.393
123	1.22	506.27	1239.22	151.45	552.018	1238.76	79.0356	558.385	1233.02	216.351	630.008	1039.88	-16.7126	640.153	1048.5	297.271	567.297	1012.88	153.469	640.637	671.523	-118.861	364.34	701.656	-105.944	373.363	711.88	-31.2273	278.749	718.852	-53.8165	177.251	688.248	-36.906	666.467	672.476	393.161	398.818	699.656	425.089	390.208	709.736	351.822	296.15	720.123	385.091	201.069	690.671	376.394
124	1.23	506.352	1239.24	151.46	552.083	1238.77	79.0314	558.461	1233.07	216.347	630.094	1039.92	-16.7198	640.265	1048.54	297.278	567.387	1012.95	153.461	640.634	671.545	-118.823	364.359	701.677	-105.936	373.37	711.884	-31.223	278.754	718.865	-53.8239	177.27	688.218	-36.8949	666.552	672.54	393.16	398.829	699.664	425.095	390.23	709.724	351.836	296.136	720.12	385.093	200.28	691.231	376.415
125	1.24	506.37	1239.28	151.481	552.125	1238.78	79.0332	558.497	1233.16	216.374	630.136	1039.96	-16.7324	640.369	1048.57	297.275	567.486	1012.99	153.45	640.615	671.56	-118.774	364.355	701.676	-105.941	373.361	711.887	-31.2325	278.752	718.856	-53.8314	177.32	688.199	-36.9217	666.57	672.581	393.155	398.82	699.685	425.095	390.26	709.726	351.848	296.127	720.115	385.103	200.493	691.054	376.401
126	1.25	506.414	1239.33	151.491	552.119	1238.81	79.0389	558.43	1233.27	216.425	630.205	1039.99	-16.7612	640.455	1048.61	297.262	567.511	1013.06	153.425	640.589	671.575	-118.723	364.355	701.686	-105.961	373.359	711.891	-31.2451	278.748	718.845	-53.8339	177.323	688.199	-36.9529	666.564	672.609	393.157	398.779	699.695	425.082	390.282	709.741	351.811	296.114	720.119	385.104	201.434	690.373	376.36
127	1.26	506.468	1239.42	151.518	552.136	1238.85	79.0377	558.548	1233.31	216.419	630.321	1040.03	-16.798	640.545	1048.65	297.248	567.577	1013.12	153.394	640.557	671.592	-118.679	364.34	701.71	-105.976	373.351	711.896	-31.2475	278.753	718.852	-53.8395	177.292	688.196	-36.9426	666.534	672.641	393.162	398.785	699.687	425.082	390.215	709.762	351.792	296.124	720.115	385.094	201.67	690.193	376.344
128	1.27	506.469	1239.53	151.569	552.131	1238.93	79.055	558.69	1233.41	216.393	630.462	1040.1	-16.8602	640.656	1048.7	297.235	567.645	1013.19	153.396	640.562	671.639	-118.645	364.307	701.725	-105.958	373.348	711.902	-31.2479	278.703	718.882	-53.8338	177.242	688.203	-36.9094	666.533	672.689	393.152	398.795	699.698	425.085	390.206	709.769	351.807	296.158	720.087	385.099	201.732	690.164	376.355
129	1.28	506.478	1239.68	151.602	552.139	1239.01	79.074	558.567	1233.54	216.409	630.596	1040.17	-16.912	640.752	1048.75	297.212	567.703	1013.27	153.389	640.587	671.709	-118.588	364.302	701.71	-105.963	373.336	711.928	-31.2473	278.687	718.887	-53.8257	177.193	688.228	-36.8932	666.541	672.743	393.143	398.766	699.696	425.079	390.16	709.788	351.8	296.132	720.082	385.12	201.726	690.161	376.377
130	1.29	506.525	1239.79	151.618	552.138	1239.07	79.0954	558.638	1233.61	216.42	630.724	1040.23	-16.9375	640.865	1048.79	297.185	567.82	1013.3	153.347	640.55	671.753	-118.508	364.295	701.698	-105.955	373.304	711.943	-31.2461	278.71	718.877	-53.837	177.209	688.226	-36.9021	666.563	672.808	393.145	398.756	699.693	425.085	390.17	709.762	351.792	296.126	720.082	385.134	201.724	690.154	376.368
131	1.3	506.572	1239.89	151.652	552.217	1239.11	79.0894	558.803	1233.66	216.404	630.842	1040.31	-16.9925	641.002	1048.82	297.137	567.983	1013.32	153.293	640.546	671.802	-118.476	364.3	701.694	-105.933	373.315	711.944	-31.2498	278.72	718.871	-53.8456	177.262	688.198	-36.9544	666.583	672.861	393.161	398.772	699.706	425.083	390.188	709.764	351.811	296.152	720.09	385.125	201.306	690.451	376.38
132	1.31	506.678	1239.97	151.661	552.298	1239.16	79.0696	558.825	1233.76	216.417	631.006	1040.38	-17.0935	641.158	1048.86	297.087	568.092	1013.35	153.257	640.567	671.867	-118.451	364.35	701.7	-105.953	373.324	711.954	-31.2562	278.714	718.857	-53.8565	177.269	688.187	-36.9553	666.628	672.904	393.154	398.812	699.711	425.089	390.168	709.766	351.826	296.133	720.116	385.125	200.336	691.145	376.413
133	1.32	506.78	1240.08	151.636	552.399	1239.23	79.0512	558.938	1233.85	216.399	631.162	1040.45	-17.1638	641.28	1048.91	297.039	568.17	1013.37	153.216	640.587	671.913	-118.442	364.341	701.714	-105.974	373.318	711.974	-31.2639	278.725	718.848	-53.8724	177.243	688.21	-36.9437	666.665	672.953	393.119	398.85	699.713	425.08	390.164	709.785	351.808	296.126	720.119	385.098	200.545	691.015	376.398
134	1.33	506.9	1240.26	151.596	552.51	1239.33	79.0128	559.014	1234.01	216.392	631.232	1040.49	-17.2444	641.389	1048.94	296.999	568.263	1013.36	153.15	640.575	671.917	-118.424	364.337	701.705	-105.998	373.307	711.987	-31.2811	278.754	718.852	-53.8987	177.245	688.214	-36.9555	666.657	672.99	393.1	398.833	699.739	425.067	390.128	709.816	351.783	296.118	720.12	385.078	201.026	690.678	376.363
135	1.34	507.094	1240.44	151.535	552.565	1239.43	79.012	559.064	1234.12	216.383	631.285	1040.51	-17.321	641.476	1048.96	296.949	568.351	1013.35	153.081	640.559	671.919	-118.399	364.315	701.691	-105.996	373.311	711.991	-31.3006	278.748	718.857	-53.9081	177.287	688.193	-36.9778	666.634	673.021	393.075	398.827	699.754	425.057	390.082	709.82	351.774	296.105	720.134	385.096	200.261	691.224	376.382
136	1.35	507.348	1240.61	151.474	552.645	1239.56	79.0039	559.155	1234.23	216.334	631.358	1040.51	-17.3883	641.544	1048.98	296.895	568.394	1013.34	153.035	640.553	671.909	-118.398	364.321	701.667	-105.971	373.31	711.986	-31.3002	278.736	718.862	-53.8986	177.271	688.2	-36.9635	666.654	673.06	393.01	398.817	699.738	425.057	390.214	709.775	351.764	296.096	720.129	385.105	200.502	691.061	376.397
137	1.36	507.62	1240.78	151.391	552.817	1239.7	78.9814	559.386	1234.3	216.275	631.47	1040.49	-17.4555	641.648	1048.99	296.835	568.415	1013.34	152.996	640.59	671.871	-118.391	364.326	701.666	-105.971	373.297	711.972	-31.296	278.735	718.864	-53.8892	177.294	688.187	-36.9735	666.723	673.113	392.973	398.817	699.715	425.058	390.281	709.73	351.768	296.151	720.1	385.118	201.012	690.694	376.396
138	1.37	507.852	1240.94	151.317	553.001	1239.83	78.9516	559.621	1234.36	216.238	631.503	1040.45	-17.5209	641.72	1048.98	296.776	568.459	1013.31	152.967	640.62	671.815	-118.377	364.307	701.664	-105.982	373.319	711.973	-31.2923	278.776	718.845	-53.9138	177.306	688.18	-36.9806	666.734	673.112	392.93	398.834	699.709	425.042	390.316	709.715	351.764	296.181	720.084	385.117	200.744	690.897	376.427
139	1.38	508.011	1241.14	151.267	553.168	1240	78.9252	559.617	1234.55	216.233	631.511	1040.4	-17.5905	641.771	1048.98	296.722	568.462	1013.31	152.938	640.606	671.749	-118.367	364.326	701.671	-106.005	373.332	711.978	-31.2946	278.797	718.847	-53.9075	177.288	688.196	-36.9743	666.706	673.092	392.865	398.839	699.719	425.047	390.276	709.742	351.779	296.218	720.075	385.127	201.567	690.326	376.403
140	1.39	508.176	1241.4	151.224	553.329	1240.15	78.88	559.805	1234.65	216.187	631.523	1040.36	-17.6668	641.806	1049	296.649	568.472	1013.32	152.869	640.625	671.666	-118.369	364.336	701.662	-106.007	373.344	711.985	-31.3026	278.769	718.868	-53.9001	177.289	688.216	-36.9701	666.739	673.107	392.787	398.896	699.734	425.041	390.204	709.77	351.777	296.223	720.077	385.129	201.348	690.506	376.415
141	1.4	508.335	1241.7	151.184	553.491	1240.31	78.8283	559.949	1234.72	216.112	631.53	1040.33	-17.7541	641.85	1049.03	296.58	568.452	1013.35	152.801	640.62	671.601	-118.387	364.33	701.66	-106.022	373.359	711.998	-31.3171	278.754	718.884	-53.9224	177.3	688.227	-36.9855	666.786	673.156	392.706	398.934	699.745	425.008	390.286	709.758	351.722	296.206	720.083	385.112	200.833	690.865	376.424
142	1.41	508.6	1241.92	151.131	553.646	1240.49	78.793	559.972	1234.94	216.06	631.508	1040.29	-17.8489	641.874	1049.06	296.534	568.424	1013.38	152.731	640.612	671.54	-118.379	364.31	701.669	-106.021	373.378	712.011	-31.3339	278.767	718.877	-53.946	177.275	688.23	-36.9852	666.792	673.185	392.615	398.916	699.748	424.996	390.19	709.787	351.678	296.177	720.11	385.095	201.119	690.645	376.408
143	1.42	508.837	1242.13	151.138	553.778	1240.64	78.7873	560.118	1235.08	215.992	631.477	1040.26	-17.9184	641.866	1049.09	296.486	568.45	1013.39	152.67	640.581	671.478	-118.346	364.325	701.66	-106.018	373.36	712.015	-31.3453	278.777	718.87	-53.9562	177.28	688.206	-36.9828	666.79	673.204	392.506	398.91	699.741	424.993	390.16	709.82	351.686	296.162	720.125	385.075	200.322	691.227	376.423
144	1.43	509.147	1242.29	151.147	553.925	1240.81	78.8068	560.412	1235.18	215.927	631.466	1040.25	-17.9741	641.858	1049.11	296.441	568.51	1013.37	152.636	640.55	671.462	-118.343	364.307	701.644	-106.005	373.329	711.993	-31.3352	278.753	718.863	-53.9527	177.257	688.188	-36.975	666.79	673.265	392.398	398.868	699.746	424.989	390.164	709.765	351.706	296.165	720.119	385.1	200.118	691.367	376.441
145	1.44	509.432	1242.52	151.143	554.107	1240.97	78.7865	560.827	1235.24	215.848	631.458	1040.24	-18.0266	641.875	1049.12	296.402	568.587	1013.35	152.605	640.574	671.468	-118.326	364.309	701.629	-105.991	373.297	711.978	-31.3161	278.766	718.845	-53.954	177.266	688.161	-36.986	666.785	673.341	392.321	398.824	699.746	424.965	390.245	709.693	351.704	296.145	720.113	385.115	200.047	691.38	376.453
146	1.45	509.6	1242.81	151.15	554.308	1241.11	78.7473	561.093	1235.35	215.828	631.466	1040.26	-18.0448	641.896	1049.13	296.376	568.684	1013.33	152.557	640.575	671.476	-118.31	364.314	701.619	-105.992	373.295	711.964	-31.3076	278.78	718.825	-53.9403	177.263	688.143	-36.9804	666.758	673.365	392.279	398.784	699.743	424.956	390.372	709.672	351.687	296.119	720.103	385.093	200.021	691.376	376.45
147	1.46	509.737	1243.08	151.135	554.471	1241.28	78.7095	561.269	1235.45	215.79	631.448	1040.26	-18.0702	641.894	1049.16	296.342	568.677	1013.35	152.527	640.53	671.476	-118.328	364.302	701.62	-105.998	373.314	711.965	-31.3184	278.784	718.833	-53.9339	177.268	688.151	-36.9668	666.732	673.378	392.267	398.779	699.757	424.959	390.392	709.668	351.688	296.115	720.119	385.096	200.028	691.389	376.449
148	1.47	509.794	1243.36	151.132	554.639	1241.47	78.6648	561.473	1235.56	215.756	631.423	1040.25	-18.1178	641.898	1049.19	296.311	568.622	1013.4	152.517	640.548	671.47	-118.34	364.273	701.632	-105.999	373.323	711.993	-31.3239	278.745	718.879	-53.9123	177.26	688.159	-36.9541	666.748	673.404	392.273	398.831	699.755	424.958	390.292	709.704	351.689	296.112	720.13	385.125	200	691.417	376.467
149	1.48	509.817	1243.64	151.112	554.744	1241.66	78.6213	561.631	1235.68	215.736	631.464	1040.25	-18.1466	641.914	1049.2	296.29	568.589	1013.45	152.501	640.567	671.479	-118.38	364.286	701.65	-105.991	373.338	712.033	-31.3436	278.686	718.91	-53.887	177.201	688.192	-36.9346	666.755	673.424	392.294	398.914	699.779	424.969	390.205	709.761	351.699	296.136	720.113	385.14	200.442	691.115	376.452
150	1.49	509.95	1243.85	151.055	554.861	1241.81	78.5651	561.772	1235.8	215.711	631.524	1040.26	-18.1604	641.934	1049.21	296.26	568.571	1013.49	152.461	640.547	671.463	-118.387	364.294	701.659	-106.004	373.35	712.045	-31.346	278.709	718.904	-53.9168	177.25	688.215	-36.9558	666.768	673.427	392.341	398.919	699.785	424.966	390.249	709.764	351.696	296.169	720.102	385.12	201.054	690.707	376.414
151	1.5	510.049	1244.02	150.962	555.023	1241.92	78.4952	561.804	1235.95	215.709	631.559	1040.27	-18.1966	641.944	1049.2	296.224	568.597	1013.49	152.413	640.554	671.456	-118.418	364.281	701.652	-106.035	373.328	712.039	-31.3671	278.769	718.885	-53.9727	177.327	688.201	-37.0025	666.779	673.408	392.41	398.916	699.779	424.964	390.361	709.718	351.677	296.195	720.101	385.096	200.769	690.899	376.409
152	1.51	510.062	1244.19	150.918	555.154	1242.02	78.4243	561.744	1236.1	215.708	631.556	1040.25	-18.2142	641.952	1049.19	296.196	568.605	1013.49	152.396	640.59	671.486	-118.449	364.284	701.638	-106.062	373.314	712.043	-31.3868	278.782	718.868	-53.9747	177.285	688.202	-36.9959	666.769	673.409	392.451	398.924	699.781	424.966	390.319	709.738	351.688	296.226	720.079	385.092	201.549	690.318	376.369
153	1.52	510.103	1244.31	150.91	555.275	1242.11	78.3876	561.952	1236.15	215.659	631.569	1040.23	-18.2127	641.939	1049.17	296.194	568.593	1013.47	152.404	640.648	671.516	-118.485	364.285	701.632	-106.044	373.325	712.036	-31.3911	278.761	718.868	-53.948	177.277	688.21	-36.9902	666.803	673.431	392.496	398.916	699.768	424.968	390.23	709.764	351.71	296.197	720.088	385.083	201.305	690.486	376.388
154	1.53	510.167	1244.39	150.87	555.42	1242.14	78.3366	561.855	1236.26	215.712	631.537	1040.23	-18.2118	641.917	1049.15	296.201	568.655	1013.44	152.411	640.659	671.525	-118.507	364.295	701.595	-106.021	373.372	712.022	-31.3977	278.746	718.86	-53.9517	177.29	688.196	-36.991	666.816	673.413	392.55	398.877	699.762	424.979	390.263	709.726	351.717	296.19	720.084	385.077	200.389	691.155	376.43
155	1.54	510.19	1244.45	150.774	555.559	1242.15	78.2474	561.862	1236.33	215.677	631.531	1040.23	-18.2285	641.901	1049.14	296.196	568.642	1013.44	152.403	640.629	671.537	-118.53	364.326	701.588	-106.01	373.377	712.017	-31.3956	278.762	718.855	-53.9534	177.296	688.173	-36.9732	666.768	673.411	392.585	398.851	699.775	424.997	390.236	709.727	351.711	296.193	720.06	385.085	200.151	691.329	376.433
156	1.55	510.293	1244.47	150.69	555.714	1242.14	78.1514	561.935	1236.36	215.617	631.541	1040.23	-18.2176	641.861	1049.12	296.178	568.687	1013.43	152.388	640.64	671.558	-118.556	364.331	701.589	-106.027	373.362	712.019	-31.3925	278.779	718.843	-53.9499	177.282	688.156	-36.9868	666.747	673.406	392.619	398.869	699.782	425.008	390.164	709.749	351.743	296.186	720.051	385.108	200.091	691.365	376.438
157	1.56	510.352	1244.49	150.584	555.848	1242.14	78.0704	561.967	1236.38	215.552	631.501	1040.23	-18.2241	641.825	1049.11	296.179	568.798	1013.43	152.358	640.611	671.532	-118.579	364.324	701.578	-106.029	373.366	712.004	-31.3801	278.794	718.847	-53.9498	177.317	688.158	-37.0036	666.74	673.377	392.633	398.864	699.776	425.007	390.218	709.735	351.736	296.182	720.068	385.115	200.077	691.373	376.432
158	1.57	510.367	1244.54	150.444	555.985	1242.13	77.971	562.059	1236.43	215.489	631.491	1040.23	-18.2386	641.836	1049.11	296.173	568.891	1013.44	152.335	640.604	671.503	-118.577	364.299	701.603	-106.043	373.37	712.016	-31.3846	278.81	718.844	-53.9637	177.324	688.178	-36.9875	666.743	673.383	392.62	398.885	699.783	425.009	390.271	709.738	351.693	296.181	720.08	385.087	200.068	691.385	376.432
159	1.58	510.325	1244.61	150.321	556.124	1242.13	77.8846	562.141	1236.52	215.409	631.479	1040.22	-18.248	641.851	1049.12	296.158	568.894	1013.49	152.31	640.583	671.488	-118.567	364.298	701.615	-106.057	373.378	712.03	-31.3947	278.795	718.855	-53.9736	177.323	688.196	-36.9931	666.773	673.406	392.582	398.882	699.787	424.988	390.255	709.743	351.677	296.18	720.104	385.058	200.515	691.087	376.419
160	1.59	510.306	1244.68	150.275	556.201	1242.16	77.8445	562.293	1236.53	215.309	631.465	1040.22	-18.2483	641.868	1049.14	296.165	568.919	1013.56	152.299	640.588	671.479	-118.555	364.288	701.635	-106.034	373.386	712.048	-31.3949	278.752	718.886	-53.9396	177.276	688.22	-36.98	666.763	673.397	392.54	398.87	699.786	424.974	390.316	709.745	351.702	296.173	720.125	385.078	201.493	690.398	376.382
161	1.6	510.311	1244.75	150.253	556.252	1242.2	77.8316	562.616	1236.51	215.208	631.526	1040.24	-18.2343	641.91	1049.17	296.193	568.948	1013.6	152.307	640.604	671.486	-118.516	364.283	701.649	-106.006	373.354	712.061	-31.3608	278.699	718.922	-53.8977	177.23	688.221	-36.9404	666.783	673.389	392.544	398.876	699.795	424.991	390.285	709.748	351.715	296.132	720.147	385.127	201.712	690.242	376.401
162	1.61	510.306	1244.82	150.214	556.27	1242.21	77.7921	562.732	1236.54	215.174	631.558	1040.23	-18.2214	641.973	1049.18	296.206	569.036	1013.61	152.312	640.587	671.489	-118.486	364.27	701.635	-105.999	373.357	712.055	-31.3519	278.695	718.928	-53.8766	177.225	688.215	-36.937	666.762	673.399	392.507	398.866	699.795	425.003	390.261	709.746	351.686	296.147	720.117	385.118	201.754	690.188	376.416
163	1.62	510.403	1244.85	150.176	556.297	1242.2	77.7475	562.775	1236.61	215.147	631.635	1040.24	-18.2198	642.056	1049.17	296.184	569.101	1013.61	152.302	640.56	671.481	-118.477	364.283	701.623	-106.017	373.35	712.027	-31.3613	278.733	718.898	-53.9126	177.251	688.203	-36.9618	666.749	673.423	392.471	398.846	699.787	424.991	390.184	709.783	351.684	296.163	720.083	385.091	201.774	690.16	376.391
164	1.63	510.454	1244.88	150.159	556.335	1242.18	77.7084	562.816	1236.71	215.119	631.722	1040.25	-18.2142	642.121	1049.16	296.159	569.124	1013.63	152.297	640.561	671.503	-118.448	364.305	701.609	-106.023	373.351	712.022	-31.356	278.768	718.858	-53.9429	177.298	688.175	-37.0038	666.752	673.412	392.457	398.858	699.783	424.983	390.171	709.78	351.693	296.163	720.076	385.081	201.792	690.123	376.369
165	1.64	510.441	1244.95	150.167	556.377	1242.17	77.6921	562.854	1236.81	215.098	631.783	1040.28	-18.1898	642.19	1049.16	296.161	569.175	1013.64	152.288	640.585	671.521	-118.406	364.34	701.599	-106.031	373.357	712.013	-31.3465	278.801	718.827	-53.9627	177.317	688.156	-37.0169	666.764	673.413	392.443	398.841	699.792	424.984	390.161	709.778	351.711	296.16	720.096	385.086	201.354	690.424	376.369
166	1.65	510.421	1245.03	150.163	556.371	1242.21	77.6902	562.917	1236.88	215.079	631.832	1040.28	-18.1892	642.249	1049.18	296.174	569.185	1013.66	152.293	640.608	671.523	-118.391	364.323	701.627	-106.034	373.357	712.007	-31.3493	278.793	718.831	-53.9792	177.304	688.175	-37.0371	666.785	673.433	392.394	398.856	699.787	424.985	390.224	709.763	351.701	296.155	720.106	385.087	200.38	691.121	376.395
167	1.66	510.374	1245.11	150.152	556.306	1242.26	77.7029	562.903	1236.93	215.063	631.878	1040.27	-18.2115	642.276	1049.2	296.184	569.181	1013.67	152.287	640.622	671.522	-118.382	364.295	701.638	-106.045	373.359	712.023	-31.3819	278.77	718.857	-53.9812	177.255	688.195	-37.0386	666.786	673.426	392.35	398.864	699.792	424.962	390.271	709.752	351.668	296.14	720.124	385.07	200.131	691.332	376.424
168	1.67	510.366	1245.18	150.155	556.23	1242.31	77.7214	562.884	1236.95	215.056	631.894	1040.26	-18.2245	642.296	1049.22	296.204	569.192	1013.67	152.304	640.597	671.487	-118.343	364.296	701.645	-106.047	373.344	712.05	-31.3801	278.73	718.894	-53.952	177.27	688.198	-37.0285	666.786	673.393	392.342	398.875	699.775	424.957	390.161	709.791	351.676	296.123	720.13	385.084	200.055	691.415	376.453
169	1.68	510.311	1245.21	150.178	556.181	1242.35	77.733	562.88	1236.94	215.08	631.929	1040.24	-18.2087	642.328	1049.22	296.232	569.227	1013.65	152.316	640.638	671.456	-118.307	364.309	701.651	-106.017	373.343	712.067	-31.3404	278.711	718.918	-53.9288	177.258	688.227	-36.9888	666.8	673.372	392.34	398.914	699.754	424.974	390.111	709.798	351.715	296.144	720.138	385.098	200.058	691.435	376.473
170	1.69	510.272	1245.2	150.183	556.195	1242.33	77.7116	562.857	1236.89	215.068	631.973	1040.2	-18.2098	642.363	1049.21	296.228	569.279	1013.59	152.321	640.667	671.446	-118.282	364.317	701.636	-105.987	373.363	712.056	-31.3438	278.733	718.92	-53.9342	177.281	688.218	-36.9693	666.818	673.364	392.309	398.948	699.739	424.985	390.171	709.754	351.729	296.172	720.123	385.105	200.536	691.113	376.467
171	1.7	510.261	1245.17	150.15	556.17	1242.3	77.6797	562.824	1236.87	215.054	631.996	1040.19	-18.2222	642.346	1049.19	296.211	569.249	1013.56	152.323	640.659	671.418	-118.279	364.323	701.623	-105.996	373.402	712.038	-31.3574	278.761	718.899	-53.951	177.316	688.193	-36.9837	666.818	673.374	392.282	398.936	699.736	424.986	390.295	709.713	351.722	296.22	720.089	385.123	201.545	690.384	376.421
172	1.71	510.299	1245.16	150.095	556.172	1242.29	77.6422	562.768	1236.87	215.084	632.015	1040.18	-18.2112	642.325	1049.16	296.208	569.233	1013.54	152.326	640.631	671.388	-118.248	364.323	701.609	-106.008	373.407	712.025	-31.3522	278.803	718.863	-53.9631	177.323	688.177	-36.999	666.808	673.366	392.288	398.926	699.733	424.964	390.343	709.678	351.697	296.216	720.063	385.114	201.358	690.495	376.417
173	1.72	510.237	1245.22	150.037	556.135	1242.3	77.6153	562.777	1236.92	215.094	632.06	1040.17	-18.2098	642.32	1049.16	296.208	569.196	1013.54	152.319	640.638	671.371	-118.204	364.303	701.614	-105.996	373.374	712.016	-31.3267	278.811	718.853	-53.9591	177.344	688.173	-37.0207	666.802	673.343	392.293	398.943	699.731	424.966	390.356	709.684	351.679	296.195	720.043	385.101	200.874	690.821	376.432
174	1.73	510.147	1245.32	149.996	556.057	1242.33	77.5951	562.719	1237.01	215.073	632.034	1040.16	-18.2356	642.281	1049.16	296.191	569.133	1013.56	152.306	640.659	671.363	-118.174	364.305	701.625	-106.013	373.344	712.019	-31.3373	278.792	718.853	-53.9843	177.338	688.147	-37.0499	666.77	673.336	392.289	398.932	699.76	424.959	390.453	709.666	351.651	296.176	720.043	385.086	201.574	690.293	376.387
175	1.74	510.055	1245.44	149.986	555.998	1242.39	77.5799	562.602	1237.1	215.028	631.978	1040.18	-18.2775	642.218	1049.16	296.166	569.069	1013.57	152.282	640.659	671.34	-118.167	364.297	701.628	-106.04	373.32	712.033	-31.3626	278.79	718.85	-54.0187	177.309	688.158	-37.0361	666.767	673.355	392.279	398.911	699.776	424.941	390.371	709.698	351.634	296.165	720.067	385.074	201.713	690.172	376.363
176	1.75	510.031	1245.55	150.017	555.917	1242.48	77.5997	562.519	1237.2	215.031	631.909	1040.19	-18.2935	642.155	1049.17	296.161	568.992	1013.58	152.267	640.643	671.338	-118.156	364.323	701.638	-106.044	373.314	712.051	-31.3605	278.772	718.861	-54.0166	177.328	688.192	-37.0591	666.785	673.359	392.292	398.903	699.779	424.947	390.253	709.732	351.661	296.165	720.099	385.069	201.768	690.155	376.37
177	1.76	510.047	1245.63	150.03	555.836	1242.56	77.6344	562.462	1237.26	215.041	631.855	1040.21	-18.2907	642.128	1049.2	296.162	568.938	1013.6	152.257	640.67	671.371	-118.151	364.347	701.636	-106.026	373.358	712.032	-31.3631	278.76	718.883	-53.9978	177.315	688.199	-37.0501	666.824	673.405	392.309	398.903	699.782	424.958	390.21	709.763	351.699	296.159	720.113	385.066	201.784	690.15	376.373
178	1.77	510.072	1245.68	150.046	555.762	1242.63	77.6475	562.335	1237.32	215.067	631.806	1040.23	-18.2985	642.086	1049.22	296.174	568.945	1013.58	152.262	640.672	671.384	-118.17	364.333	701.639	-105.997	373.373	712.03	-31.3771	278.756	718.891	-53.9882	177.284	688.195	-37.0279	666.778	673.398	392.3	398.893	699.777	424.951	390.205	709.758	351.689	296.176	720.115	385.083	201.365	690.467	376.406
179	1.78	510.031	1245.74	150.047	555.679	1242.68	77.6599	562.096	1237.39	215.12	631.744	1040.22	-18.3103	642.02	1049.23	296.185	568.962	1013.54	152.297	640.647	671.394	-118.209	364.32	701.632	-105.996	373.344	712.025	-31.3595	278.754	718.898	-53.9773	177.288	688.196	-37.0098	666.772	673.418	392.284	398.892	699.762	424.948	390.251	709.715	351.684	296.153	720.103	385.11	200.395	691.172	376.464
180	1.79	509.95	1245.77	150.048	555.626	1242.69	77.6724	562.064	1237.37	215.124	631.693	1040.22	-18.2724	641.952	1049.23	296.202	568.952	1013.5	152.317	640.622	671.417	-118.224	364.312	701.616	-105.998	373.337	712.036	-31.3375	278.749	718.895	-53.9525	177.287	688.207	-37.0025	666.814	673.431	392.318	398.857	699.747	424.956	390.273	709.705	351.712	296.152	720.098	385.127	200.131	691.364	376.478
181	1.8	509.823	1245.8	150.051	555.541	1242.69	77.6924	562.183	1237.33	215.069	631.659	1040.25	-18.235	641.904	1049.22	296.21	568.893	1013.5	152.318	640.631	671.431	-118.225	364.308	701.617	-105.989	373.339	712.037	-31.3402	278.737	718.891	-53.9342	177.293	688.217	-36.9991	666.84	673.438	392.355	398.863	699.756	424.965	390.256	709.721	351.717	296.158	720.105	385.126	200.055	691.411	376.465
182	1.81	509.734	1245.77	150.052	555.47	1242.67	77.6716	562.116	1237.3	215.055	631.608	1040.25	-18.2442	641.853	1049.2	296.205	568.845	1013.5	152.315	640.635	671.432	-118.244	364.309	701.608	-105.999	373.317	712.035	-31.3454	278.73	718.893	-53.9422	177.264	688.2	-36.9866	666.844	673.456	392.356	398.865	699.76	424.962	390.277	709.721	351.712	296.151	720.105	385.118	200.484	691.087	376.433
183	1.82	509.742	1245.71	150.012	555.419	1242.63	77.6385	561.98	1237.32	215.044	631.527	1040.27	-18.2654	641.811	1049.19	296.196	568.861	1013.49	152.299	640.622	671.453	-118.282	364.324	701.608	-106.035	373.31	712.027	-31.3584	278.76	718.876	-53.9849	177.267	688.16	-37.0305	666.81	673.446	392.342	398.882	699.764	424.956	390.34	709.701	351.682	296.152	720.087	385.095	201.026	690.667	376.396
184	1.83	509.702	1245.66	149.998	555.35	1242.59	77.6234	561.672	1237.4	215.083	631.507	1040.27	-18.2748	641.773	1049.17	296.199	568.849	1013.48	152.3	640.623	671.479	-118.318	364.321	701.594	-106.036	373.327	712.033	-31.3707	278.762	718.867	-54.0071	177.267	688.147	-37.047	666.77	673.417	392.343	398.863	699.767	424.961	390.323	709.73	351.683	296.177	720.092	385.087	200.731	690.861	376.409
185	1.84	509.609	1245.62	150.022	555.269	1242.54	77.6257	561.586	1237.36	215.099	631.522	1040.29	-18.2595	641.761	1049.15	296.225	568.822	1013.48	152.306	640.617	671.498	-118.314	364.305	701.608	-106.027	373.33	712.039	-31.3764	278.745	718.863	-53.9959	177.253	688.171	-37.0087	666.743	673.394	392.382	398.839	699.754	424.976	390.228	709.746	351.69	296.191	720.088	385.088	201.083	690.602	376.404
186	1.85	509.531	1245.6	150.03	555.144	1242.53	77.6519	561.857	1237.25	215.055	631.527	1040.29	-18.2468	641.769	1049.16	296.251	568.839	1013.48	152.343	640.635	671.517	-118.333	364.291	701.628	-106.016	373.343	712.034	-31.3713	278.757	718.868	-53.984	177.238	688.181	-36.9933	666.731	673.379	392.392	398.826	699.752	424.973	390.236	709.73	351.69	296.186	720.092	385.086	200.75	690.855	376.422
187	1.86	509.448	1245.62	150.044	555.009	1242.54	77.683	561.745	1237.26	215.069	631.524	1040.28	-18.2336	641.794	1049.16	296.272	568.857	1013.47	152.379	640.655	671.552	-118.371	364.285	701.628	-106.028	373.319	712.037	-31.3525	278.746	718.892	-53.9588	177.262	688.203	-36.9869	666.743	673.379	392.391	398.859	699.744	424.959	390.244	709.726	351.683	296.176	720.09	385.101	201.527	690.32	376.401
188	1.87	509.393	1245.62	150.037	554.866	1242.56	77.6948	561.498	1237.27	215.097	631.524	1040.27	-18.2106	641.799	1049.16	296.291	568.804	1013.5	152.397	640.631	671.557	-118.383	364.29	701.639	-106.028	373.344	712.049	-31.3679	278.735	718.907	-53.9522	177.229	688.224	-36.9799	666.733	673.368	392.397	398.886	699.744	424.962	390.187	709.768	351.716	296.18	720.09	385.119	201.286	690.519	376.403
189	1.88	509.32	1245.62	150.037	554.724	1242.55	77.7045	561.604	1237.18	215.073	631.529	1040.26	-18.1959	641.785	1049.17	296.309	568.723	1013.51	152.401	640.614	671.556	-118.391	364.281	701.65	-106.043	373.369	712.054	-31.3848	278.722	718.923	-53.9611	177.224	688.234	-36.9811	666.734	673.337	392.399	398.862	699.751	424.964	390.13	709.815	351.734	296.152	720.109	385.124	200.784	690.885	376.417
190	1.89	509.242	1245.61	150.04	554.62	1242.53	77.6942	561.598	1237.17	215.063	631.522	1040.28	-18.1841	641.775	1049.17	296.323	568.707	1013.49	152.429	640.61	671.551	-118.406	364.288	701.661	-106.044	373.35	712.073	-31.3843	278.714	718.923	-53.9528	177.237	688.222	-36.989	666.761	673.341	392.37	398.877	699.753	424.964	390.102	709.824	351.732	296.147	720.115	385.113	201.114	690.652	376.421
191	1.9	509.208	1245.56	150.014	554.578	1242.49	77.67	561.547	1237.14	215.04	631.535	1040.28	-18.1836	641.763	1049.16	296.326	568.758	1013.46	152.426	640.655	671.562	-118.406	364.289	701.651	-106.055	373.321	712.063	-31.3772	278.763	718.887	-53.982	177.278	688.182	-37.0237	666.734	673.32	392.363	398.904	699.75	424.974	390.183	709.795	351.717	296.181	720.133	385.096	200.353	691.205	376.426
192	1.91	509.161	1245.5	149.978	554.551	1242.44	77.6344	561.512	1237.09	215.033	631.516	1040.27	-18.1706	641.74	1049.14	296.328	568.77	1013.42	152.402	640.646	671.533	-118.372	364.28	701.634	-106.05	373.337	712.048	-31.3705	278.784	718.867	-54.0029	177.306	688.166	-37.0477	666.749	673.303	392.349	398.926	699.743	424.982	390.208	709.788	351.708	296.193	720.108	385.08	200.59	691.037	376.406
193	1.92	509.089	1245.43	149.974	554.475	1242.39	77.6504	561.374	1237.01	215.034	631.487	1040.26	-18.1693	641.704	1049.11	296.347	568.742	1013.37	152.427	640.619	671.486	-118.318	364.289	701.619	-106.04	373.312	712.03	-31.3448	278.78	718.857	-53.9913	177.308	688.169	-37.0508	666.739	673.265	392.338	398.89	699.724	424.976	390.269	709.732	351.701	296.185	720.08	385.085	201.077	690.666	376.422
194	1.93	509.07	1245.36	149.988	554.396	1242.33	77.675	561.228	1236.86	215.049	631.485	1040.23	-18.1375	641.67	1049.1	296.376	568.734	1013.34	152.495	640.622	671.442	-118.3	364.291	701.619	-106.003	373.269	712.013	-31.3184	278.764	718.856	-53.9589	177.265	688.191	-37.0044	666.765	673.26	392.3	398.913	699.701	424.963	390.297	709.716	351.718	296.174	720.065	385.108	200.316	691.192	376.47
195	1.94	509.023	1245.26	150.006	554.368	1242.29	77.6596	561.131	1236.74	215.07	631.515	1040.21	-18.11	641.661	1049.08	296.391	568.771	1013.3	152.522	640.621	671.42	-118.281	364.305	701.615	-105.998	373.269	711.996	-31.3317	278.767	718.846	-53.9412	177.254	688.183	-36.9752	666.769	673.255	392.283	398.932	699.678	424.966	390.222	709.702	351.743	296.216	720.055	385.113	200.594	691.001	376.468
196	1.95	509.015	1245.18	149.989	554.357	1242.23	77.6311	561.065	1236.7	215.077	631.507	1040.18	-18.1076	641.654	1049.07	296.397	568.807	1013.28	152.496	640.63	671.378	-118.246	364.309	701.61	-106.012	373.308	711.984	-31.3461	278.772	718.853	-53.961	177.287	688.167	-36.9929	666.789	673.256	392.308	398.925	699.673	424.967	390.179	709.705	351.709	296.22	720.044	385.106	201.506	690.341	376.423
197	1.96	508.919	1245.18	149.978	554.335	1242.21	77.6098	560.972	1236.67	215.099	631.499	1040.17	-18.1138	641.638	1049.07	296.392	568.772	1013.27	152.484	640.606	671.336	-118.195	364.312	701.626	-106.01	373.332	711.997	-31.3642	278.763	718.867	-53.9861	177.285	688.187	-37.0351	666.753	673.222	392.333	398.918	699.694	424.962	390.113	709.753	351.7	296.205	720.058	385.101	201.716	690.186	376.398
198	1.97	508.879	1245.16	149.98	554.295	1242.23	77.6134	560.893	1236.65	215.106	631.521	1040.19	-18.0986	641.645	1049.09	296.398	568.718	1013.27	152.509	640.601	671.331	-118.156	364.34	701.644	-106.014	373.35	712.013	-31.3601	278.756	718.887	-53.9875	177.274	688.187	-37.0405	666.699	673.186	392.33	398.879	699.716	424.985	390.085	709.789	351.704	296.195	720.096	385.127	201.785	690.155	376.39
199	1.98	508.855	1245.19	149.963	554.215	1242.28	77.6361	560.872	1236.66	215.116	631.548	1040.19	-18.1048	641.646	1049.11	296.398	568.697	1013.29	152.514	640.594	671.329	-118.114	364.372	701.65	-106.025	373.347	712.029	-31.3505	278.768	718.892	-53.9917	177.282	688.191	-37.0242	666.694	673.194	392.344	398.897	699.734	424.984	390.154	709.8	351.718	296.162	720.124	385.13	201.359	690.468	376.407
200	1.99	508.782	1245.24	149.953	554.143	1242.32	77.6454	560.812	1236.67	215.105	631.537	1040.19	-18.1035	641.641	1049.12	296.392	568.683	1013.29	152.491	640.63	671.317	-118.063	364.361	701.663	-106.027	373.342	712.04	-31.343	278.752	718.9	-54.0035	177.279	688.22	-37.0405	666.745	673.243	392.376	398.879	699.741	424.975	390.178	709.802	351.7	296.133	720.136	385.11	200.367	691.173	376.439
201	2	508.75	1245.26	149.949	554.1	1242.35	77.6505	560.772	1236.66	215.078	631.559	1040.2	-18.0964	641.661	1049.12	296.391	568.654	1013.28	152.499	640.648	671.321	-118.021	364.328	701.66	-106.02	373.35	712.054	-31.3511	278.745	718.915	-54.0003	177.304	688.211	-37.0619	666.767	673.283	392.401	398.856	699.737	424.961	390.132	709.801	351.699	296.128	720.131	385.105	200.112	691.359	376.436
202	2.01	508.774	1245.3	149.914	554.095	1242.38	77.6365	560.716	1236.67	215.074	631.618	1040.2	-18.0999	641.668	1049.14	296.399	568.666	1013.24	152.53	640.647	671.308	-118.003	364.328	701.636	-105.99	373.366	712.049	-31.3459	278.767	718.913	-54.0022	177.344	688.191	-37.0691	666.762	673.311	392.389	398.905	699.736	424.972	390.09	709.801	351.703	296.146	720.126	385.118	200.066	691.402	376.441
203	2.02	508.717	1245.31	149.902	554.069	1242.42	77.623	560.624	1236.7	215.069	631.613	1040.21	-18.1095	641.643	1049.14	296.396	568.69	1013.2	152.535	640.641	671.296	-117.978	364.337	701.629	-105.991	373.359	712.034	-31.34	278.779	718.895	-53.9979	177.341	688.194	-37.0725	666.778	673.332	392.395	398.903	699.758	424.975	390.123	709.761	351.694	296.153	720.128	385.129	200.534	691.086	376.435
204	2.03	508.669	1245.35	149.857	554.029	1242.46	77.6065	560.591	1236.74	215.057	631.583	1040.22	-18.0992	641.624	1049.13	296.385	568.69	1013.18	152.525	640.644	671.291	-117.944	364.353	701.622	-105.996	373.34	712.033	-31.3419	278.769	718.887	-54.0035	177.319	688.2	-37.0602	666.782	673.347	392.431	398.878	699.762	424.986	390.157	709.763	351.717	296.151	720.109	385.118	201.065	690.698	376.414
205	2.04	508.683	1245.38	149.824	554.032	1242.48	77.5869	560.562	1236.77	215.058	631.605	1040.22	-18.1078	641.639	1049.14	296.365	568.728	1013.18	152.518	640.659	671.288	-117.915	364.358	701.621	-105.987	373.342	712.033	-31.3436	278.757	718.891	-54.0083	177.339	688.174	-37.0626	666.752	673.339	392.463	398.911	699.75	424.994	390.148	709.748	351.745	296.207	720.074	385.108	200.76	690.903	376.413
206	2.05	508.692	1245.41	149.809	554.038	1242.51	77.565	560.523	1236.81	215.03	631.635	1040.21	-18.1343	641.682	1049.15	296.351	568.779	1013.16	152.513	640.677	671.301	-117.902	364.369	701.624	-105.993	373.317	712.023	-31.3266	278.762	718.89	-54.0028	177.307	688.169	-37.0617	666.749	673.334	392.458	398.952	699.754	425.002	390.196	709.763	351.741	296.264	720.061	385.121	201.558	690.326	376.391
207	2.06	508.641	1245.44	149.804	554.036	1242.55	77.5495	560.544	1236.83	214.985	631.701	1040.23	-18.1659	641.708	1049.16	296.336	568.777	1013.15	152.502	640.705	671.305	-117.898	364.368	701.631	-106.011	373.334	712.029	-31.332	278.759	718.892	-54.0058	177.298	688.17	-37.0596	666.776	673.341	392.459	398.963	699.749	424.994	390.389	709.725	351.704	296.268	720.042	385.109	201.777	690.179	376.386
208	2.07	508.59	1245.48	149.773	554.058	1242.57	77.5113	560.506	1236.85	214.949	631.714	1040.23	-18.1922	641.745	1049.17	296.32	568.732	1013.18	152.488	640.708	671.292	-117.895	364.354	701.623	-106.017	373.357	712.043	-31.3479	278.758	718.889	-54.0188	177.312	688.171	-37.0609	666.793	673.343	392.429	398.954	699.731	424.975	390.35	709.71	351.699	296.214	720.054	385.098	201.827	690.135	376.379
209	2.08	508.603	1245.51	149.741	554.069	1242.6	77.4947	560.458	1236.81	214.93	631.72	1040.23	-18.1956	641.81	1049.19	296.302	568.783	1013.18	152.481	640.691	671.276	-117.91	364.347	701.61	-106.012	373.341	712.055	-31.3427	278.781	718.883	-54.0245	177.26	688.196	-37.0348	666.777	673.358	392.38	398.945	699.728	424.972	390.234	709.741	351.728	296.212	720.067	385.108	201.832	690.132	376.38
210	2.09	508.628	1245.54	149.722	554.069	1242.63	77.4871	560.451	1236.82	214.923	631.725	1040.21	-18.1957	641.859	1049.21	296.283	568.88	1013.15	152.471	640.692	671.275	-117.929	364.342	701.613	-106.011	373.33	712.042	-31.3475	278.784	718.878	-54.0118	177.281	688.191	-37.057	666.755	673.346	392.336	398.957	699.73	424.974	390.253	709.757	351.733	296.224	720.059	385.126	201.416	690.434	376.416
211	2.1	508.633	1245.56	149.702	554.091	1242.65	77.4512	560.43	1236.86	214.918	631.739	1040.2	-18.2193	641.901	1049.22	296.26	568.911	1013.14	152.46	640.652	671.258	-117.959	364.356	701.605	-106.026	373.327	712.03	-31.3657	278.798	718.866	-54.0171	177.339	688.163	-37.0722	666.746	673.363	392.305	398.933	699.749	424.969	390.355	709.735	351.703	296.216	720.071	385.128	200.431	691.13	376.455
212	2.11	508.634	1245.58	149.673	554.098	1242.68	77.4079	560.375	1236.93	214.888	631.739	1040.19	-18.2283	641.953	1049.24	296.241	568.935	1013.16	152.423	640.627	671.261	-117.977	364.349	701.617	-106.044	373.346	712.033	-31.3927	278.785	718.873	-54.0433	177.284	688.165	-37.064	666.774	673.422	392.278	398.903	699.773	424.959	390.287	709.744	351.687	296.176	720.094	385.106	200.164	691.326	376.45
213	2.12	508.617	1245.62	149.644	554.079	1242.7	77.3945	560.316	1236.94	214.872	631.769	1040.17	-18.2451	642.002	1049.26	296.23	568.958	1013.19	152.413	640.634	671.249	-117.98	364.342	701.624	-106.04	373.335	712.046	-31.387	278.759	718.901	-54.0384	177.259	688.194	-37.0465	666.789	673.443	392.259	398.887	699.781	424.959	390.234	709.745	351.694	296.142	720.104	385.082	200.059	691.404	376.453
214	2.13	508.614	1245.65	149.642	554.04	1242.72	77.3943	560.34	1236.95	214.881	631.788	1040.15	-18.2545	642.043	1049.28	296.219	568.986	1013.22	152.417	640.634	671.227	-117.976	364.334	701.633	-106.017	373.299	712.065	-31.3627	278.742	718.921	-54.0225	177.23	688.244	-37.0162	666.765	673.43	392.228	398.91	699.79	424.96	390.271	709.745	351.688	296.139	720.119	385.096	200.033	691.441	376.462
215	2.14	508.62	1245.66	149.617	554.067	1242.72	77.3629	560.421	1236.94	214.865	631.842	1040.15	-18.2618	642.104	1049.29	296.193	569.005	1013.24	152.392	640.647	671.224	-117.975	364.334	701.644	-106.025	373.321	712.076	-31.3677	278.767	718.921	-54.0265	177.241	688.257	-37.0327	666.767	673.423	392.205	398.94	699.794	424.964	390.206	709.787	351.686	296.183	720.121	385.096	200.066	691.446	376.449
216	2.15	508.639	1245.63	149.596	554.124	1242.7	77.331	560.456	1236.91	214.856	631.889	1040.12	-18.2965	642.151	1049.28	296.166	569.043	1013.25	152.353	640.666	671.202	-117.977	364.356	701.64	-106.047	373.358	712.069	-31.3823	278.782	718.921	-54.0391	177.272	688.244	-37.038	666.763	673.411	392.196	398.935	699.783	424.948	390.299	709.762	351.687	296.217	720.113	385.096	200.538	691.117	376.422
217	2.16	508.635	1245.58	149.603	554.127	1242.68	77.3356	560.457	1236.85	214.844	631.937	1040.09	-18.2856	642.158	1049.27	296.142	569.075	1013.25	152.344	640.648	671.166	-117.99	364.35	701.628	-106.03	373.331	712.05	-31.3621	278.76	718.916	-54.0138	177.306	688.224	-37.0552	666.773	673.416	392.18	398.909	699.773	424.939	390.292	709.734	351.677	296.212	720.088	385.122	201.078	690.722	376.431
218	2.17	508.663	1245.5	149.618	554.141	1242.63	77.3434	560.495	1236.77	214.833	631.99	1040.06	-18.2707	642.21	1049.26	296.13	569.146	1013.24	152.362	640.628	671.135	-117.991	364.348	701.601	-106.003	373.327	712.028	-31.3488	278.763	718.892	-53.9944	177.332	688.19	-37.0454	666.776	673.413	392.157	398.927	699.735	424.957	390.288	709.706	351.678	296.229	720.061	385.141	200.802	690.906	376.485
219	2.18	508.708	1245.41	149.617	554.153	1242.57	77.3305	560.496	1236.68	214.829	632.001	1040.02	-18.3002	642.273	1049.25	296.113	569.171	1013.24	152.371	640.644	671.109	-117.996	364.369	701.572	-105.995	373.36	712.021	-31.3517	278.819	718.864	-54.0093	177.331	688.169	-37.0347	666.808	673.423	392.149	398.966	699.713	424.97	390.393	709.644	351.669	296.271	720.022	385.139	201.621	690.317	376.445
220	2.19	508.696	1245.35	149.619	554.172	1242.52	77.2916	560.491	1236.63	214.82	632.026	1040	-18.3168	642.328	1049.25	296.094	569.204	1013.24	152.371	640.683	671.098	-117.994	364.355	701.571	-105.996	373.376	712.003	-31.3451	278.822	718.856	-54.0177	177.333	688.165	-37.0531	666.759	673.416	392.132	398.97	699.713	424.95	390.364	709.67	351.661	296.251	720.026	385.118	201.798	690.174	376.413
221	2.2	508.679	1245.32	149.627	554.159	1242.49	77.2936	560.524	1236.57	214.828	632.047	1039.99	-18.31	642.354	1049.26	296.073	569.219	1013.28	152.335	640.674	671.086	-118.008	364.339	701.575	-106.001	373.367	711.991	-31.3434	278.812	718.86	-54.0192	177.338	688.167	-37.065	666.74	673.408	392.145	398.941	699.734	424.954	390.312	709.699	351.674	296.222	720.053	385.116	201.42	690.441	376.425
222	2.21	508.652	1245.29	149.626	554.175	1242.45	77.282	560.58	1236.55	214.853	632.045	1039.96	-18.2968	642.364	1049.29	296.049	569.213	1013.34	152.287	640.651	671.074	-118.024	364.376	701.592	-106.019	373.382	712.012	-31.378	278.805	718.879	-54.0111	177.347	688.185	-37.0863	666.738	673.408	392.175	398.916	699.778	424.966	390.196	709.739	351.683	296.195	720.1	385.11	200.468	691.143	376.446
223	2.22	508.682	1245.27	149.619	554.159	1242.44	77.2791	560.584	1236.56	214.816	632.048	1039.92	-18.3255	642.391	1049.31	296.029	569.149	1013.42	152.246	640.664	671.07	-118.036	364.37	701.627	-106.029	373.367	712.024	-31.383	278.795	718.908	-54.005	177.354	688.224	-37.0952	666.765	673.44	392.185	398.925	699.801	424.944	390.146	709.785	351.662	296.176	720.122	385.092	200.191	691.359	376.444
224	2.23	508.68	1245.27	149.601	554.166	1242.43	77.2521	560.587	1236.55	214.776	632.098	1039.9	-18.3479	642.396	1049.33	296.004	569.135	1013.48	152.229	640.683	671.029	-118.046	364.332	701.639	-106.018	373.357	712.033	-31.3812	278.78	718.951	-54.007	177.335	688.244	-37.0791	666.791	673.454	392.206	398.923	699.797	424.929	390.225	709.784	351.644	296.208	720.12	385.083	200.574	691.109	376.427
225	2.24	508.698	1245.25	149.583	554.198	1242.41	77.2103	560.604	1236.5	214.775	632.111	1039.83	-18.3415	642.361	1049.33	295.987	569.119	1013.51	152.229	640.671	670.974	-118.056	364.33	701.628	-106.017	373.37	712.041	-31.3863	278.77	718.954	-53.996	177.339	688.253	-37.0889	666.796	673.457	392.229	398.923	699.801	424.929	390.246	709.764	351.654	296.195	720.125	385.076	201.099	690.748	376.433
226	2.25	508.703	1245.22	149.591	554.166	1242.4	77.2253	560.609	1236.43	214.795	632.128	1039.75	-18.3112	642.314	1049.32	295.998	569.149	1013.48	152.253	640.648	670.897	-118.077	364.354	701.618	-106.016	373.383	712.027	-31.3713	278.784	718.942	-53.9817	177.363	688.232	-37.0762	666.783	673.43	392.236	398.949	699.787	424.957	390.217	709.765	351.676	296.218	720.112	385.1	200.369	691.268	376.484
227	2.26	508.711	1245.17	149.635	554.201	1242.34	77.2256	560.605	1236.4	214.793	632.162	1039.68	-18.3173	642.253	1049.29	296.013	569.185	1013.44	152.265	640.647	670.827	-118.084	364.375	701.587	-106.012	373.37	711.997	-31.3344	278.813	718.908	-53.9792	177.356	688.187	-37.04	666.809	673.447	392.232	398.958	699.754	424.97	390.286	709.731	351.687	296.259	720.068	385.127	200.651	691.037	376.473
228	2.27	508.76	1245.11	149.615	554.27	1242.26	77.1834	560.582	1236.34	214.768	632.17	1039.62	-18.3185	642.211	1049.26	296.008	569.141	1013.42	152.245	640.676	670.789	-118.064	364.393	701.552	-106.023	373.378	711.969	-31.3458	278.842	718.869	-54.0006	177.388	688.157	-37.0457	666.838	673.45	392.26	398.961	699.737	424.97	390.314	709.715	351.676	296.269	720.043	385.117	201.158	690.647	376.435
229	2.28	508.765	1245.06	149.573	554.306	1242.2	77.1394	560.572	1236.33	214.745	632.106	1039.55	-18.3248	642.13	1049.23	295.98	569.105	1013.4	152.219	640.677	670.751	-118.048	364.405	701.538	-106.033	373.395	711.939	-31.3768	278.885	718.84	-54.0335	177.372	688.132	-37.0603	666.818	673.436	392.294	398.941	699.735	424.963	390.324	709.693	351.688	296.268	720.022	385.091	200.854	690.831	376.432
230	2.29	508.739	1245.04	149.574	554.284	1242.19	77.1292	560.568	1236.34	214.765	632.035	1039.51	-18.3364	642.032	1049.22	295.972	569.014	1013.41	152.226	640.655	670.693	-118.032	364.386	701.543	-106.035	373.384	711.936	-31.3764	278.866	718.852	-54.0449	177.374	688.142	-37.1001	666.814	673.463	392.317	398.949	699.756	424.967	390.352	709.685	351.671	296.234	720.022	385.092	201.607	690.267	376.385
231	2.3	508.743	1245.07	149.567	554.211	1242.2	77.1339	560.575	1236.36	214.772	632.004	1039.48	-18.3269	641.938	1049.23	295.977	568.935	1013.42	152.215	640.655	670.646	-118.003	364.394	701.548	-106.042	373.363	711.96	-31.3718	278.833	718.879	-54.0182	177.381	688.176	-37.0969	666.813	673.484	392.348	398.958	699.777	424.974	390.409	709.681	351.674	296.224	720.048	385.099	201.311	690.474	376.408
232	2.31	508.719	1245.09	149.56	554.165	1242.22	77.1389	560.576	1236.37	214.741	631.928	1039.47	-18.3213	641.84	1049.24	295.98	568.838	1013.42	152.236	640.63	670.615	-117.97	364.383	701.566	-106.03	373.367	711.979	-31.3664	278.813	718.903	-53.9982	177.337	688.21	-37.0637	666.811	673.489	392.38	398.941	699.784	424.997	390.32	709.717	351.685	296.185	720.08	385.106	200.782	690.867	376.442
233	2.32	508.668	1245.1	149.55	554.155	1242.22	77.1172	560.584	1236.37	214.73	631.825	1039.43	-18.3308	641.741	1049.25	295.984	568.822	1013.4	152.251	640.588	670.592	-117.951	364.376	701.569	-106.02	373.401	711.986	-31.3664	278.826	718.918	-53.9969	177.306	688.229	-37.0528	666.798	673.481	392.402	398.893	699.793	424.999	390.249	709.743	351.699	296.153	720.116	385.117	201.096	690.67	376.428
234	2.33	508.631	1245.1	149.558	554.131	1242.19	77.1021	560.538	1236.37	214.702	631.782	1039.39	-18.3387	641.666	1049.26	295.993	568.813	1013.38	152.244	640.558	670.543	-117.893	364.378	701.575	-106.003	373.375	711.996	-31.3541	278.821	718.93	-53.9951	177.294	688.253	-37.0402	666.821	673.492	392.427	398.84	699.777	424.983	390.177	709.76	351.7	296.152	720.138	385.124	200.33	691.242	376.46
235	2.34	508.65	1245.09	149.547	554.11	1242.17	77.0983	560.508	1236.36	214.684	631.724	1039.34	-18.3486	641.604	1049.24	295.995	568.722	1013.36	152.247	640.559	670.503	-117.875	364.405	701.565	-105.993	373.366	711.995	-31.3589	278.808	718.938	-53.9829	177.298	688.247	-37.0265	666.806	673.495	392.449	398.838	699.766	424.981	390.247	709.726	351.702	296.149	720.133	385.123	200.134	691.385	376.483
236	2.35	508.662	1245.06	149.537	554.104	1242.15	77.0791	560.501	1236.37	214.676	631.654	1039.3	-18.3789	641.534	1049.22	295.993	568.638	1013.33	152.244	640.547	670.454	-117.852	364.4	701.562	-105.98	373.385	711.978	-31.3564	278.803	718.915	-53.986	177.35	688.226	-37.08	666.804	673.485	392.469	398.878	699.783	424.987	390.322	709.696	351.709	296.167	720.108	385.122	200.502	691.084	376.467
237	2.36	508.633	1245.05	149.526	554.057	1242.11	77.0333	560.532	1236.37	214.671	631.582	1039.3	-18.4004	641.457	1049.19	295.973	568.577	1013.33	152.226	640.563	670.414	-117.833	364.411	701.554	-105.986	373.367	711.956	-31.349	278.802	718.897	-53.9974	177.344	688.216	-37.1073	666.783	673.456	392.506	398.896	699.774	424.983	390.251	709.706	351.712	296.176	720.095	385.114	201.495	690.362	376.414
238	2.37	508.604	1245.04	149.511	553.997	1242.09	76.9998	560.518	1236.35	214.692	631.51	1039.29	-18.4041	641.392	1049.16	295.965	568.497	1013.32	152.201	640.58	670.401	-117.817	364.41	701.549	-106.022	373.354	711.951	-31.3594	278.83	718.891	-54.0292	177.343	688.192	-37.1175	666.722	673.415	392.517	398.915	699.777	424.988	390.14	709.758	351.717	296.21	720.076	385.116	201.735	690.174	376.387
239	2.38	508.64	1245.02	149.473	553.981	1242.06	76.9643	560.493	1236.34	214.672	631.47	1039.28	-18.4199	641.327	1049.13	295.952	568.461	1013.27	152.179	640.579	670.387	-117.797	364.38	701.55	-106.03	373.367	711.958	-31.3686	278.835	718.885	-54.0421	177.354	688.172	-37.1228	666.754	673.425	392.538	398.911	699.767	424.987	390.193	709.753	351.696	296.2	720.07	385.102	201.382	690.431	376.384
240	2.39	508.614	1245	149.441	554.002	1242.02	76.9351	560.454	1236.35	214.641	631.419	1039.25	-18.436	641.282	1049.13	295.932	568.43	1013.25	152.171	640.565	670.373	-117.796	364.377	701.555	-106.03	373.368	711.961	-31.374	278.855	718.888	-54.0516	177.359	688.154	-37.1185	666.803	673.445	392.521	398.926	699.763	424.984	390.373	709.684	351.654	296.154	720.068	385.066	200.429	691.125	376.402
241	2.4	508.578	1244.99	149.452	553.922	1242.04	76.9549	560.451	1236.36	214.627	631.363	1039.23	-18.4445	641.229	1049.14	295.929	568.404	1013.24	152.192	640.554	670.357	-117.814	364.384	701.563	-106.013	373.392	711.962	-31.3835	278.839	718.895	-54.029	177.353	688.187	-37.0934	666.808	673.434	392.503	398.91	699.748	424.986	390.311	709.701	351.66	296.183	720.076	385.076	200.187	691.316	376.43
242	2.41	508.527	1245.01	149.486	553.815	1242.06	76.9971	560.459	1236.36	214.635	631.357	1039.23	-18.439	641.192	1049.15	295.952	568.346	1013.23	152.223	640.558	670.353	-117.821	364.383	701.578	-105.99	373.381	711.973	-31.3552	278.796	718.92	-53.9865	177.304	688.205	-37.0411	666.776	673.42	392.487	398.89	699.742	424.995	390.231	709.708	351.673	296.208	720.101	385.118	200.553	691.064	376.463
243	2.42	508.523	1244.98	149.51	553.77	1242.05	77.0144	560.437	1236.34	214.632	631.312	1039.21	-18.4316	641.19	1049.16	295.961	568.338	1013.2	152.241	640.554	670.341	-117.848	364.394	701.559	-105.975	373.418	711.956	-31.3285	278.793	718.921	-53.9577	177.316	688.205	-37.0246	666.775	673.429	392.466	398.872	699.735	424.993	390.268	709.677	351.708	296.206	720.101	385.14	201.51	690.386	376.452
244	2.43	508.511	1244.89	149.502	553.741	1241.99	76.9882	560.393	1236.32	214.597	631.285	1039.17	-18.4442	641.179	1049.15	295.931	568.365	1013.16	152.224	640.571	670.344	-117.893	364.392	701.536	-106	373.419	711.933	-31.3373	278.819	718.906	-53.9703	177.331	688.205	-37.0481	666.77	673.436	392.446	398.836	699.725	424.978	390.289	709.67	351.72	296.197	720.089	385.137	201.73	690.215	376.435
245	2.44	508.448	1244.86	149.466	553.706	1241.93	76.9442	560.357	1236.31	214.585	631.231	1039.14	-18.4808	641.147	1049.12	295.889	568.324	1013.15	152.199	640.581	670.336	-117.919	364.39	701.523	-106.007	373.396	711.926	-31.3551	278.83	718.887	-53.9928	177.336	688.19	-37.0634	666.785	673.434	392.425	398.861	699.751	424.97	390.291	709.675	351.724	296.202	720.09	385.121	201.791	690.154	376.406
246	2.45	508.414	1244.82	149.434	553.709	1241.87	76.9036	560.321	1236.28	214.576	631.213	1039.15	-18.4989	641.135	1049.09	295.85	568.299	1013.11	152.161	640.587	670.325	-117.947	364.385	701.507	-106.024	373.387	711.924	-31.3705	278.824	718.878	-54.0025	177.346	688.172	-37.09	666.808	673.439	392.418	398.862	699.763	424.968	390.173	709.745	351.714	296.206	720.067	385.108	201.376	690.434	376.396
247	2.46	508.387	1244.76	149.412	553.698	1241.82	76.864	560.334	1236.28	214.569	631.248	1039.13	-18.5129	641.146	1049.09	295.814	568.264	1013.07	152.121	640.584	670.307	-117.983	364.415	701.507	-106.039	373.38	711.926	-31.376	278.829	718.877	-54.0134	177.315	688.179	-37.087	666.816	673.444	392.405	398.892	699.768	424.962	390.098	709.787	351.713	296.199	720.05	385.105	200.858	690.806	376.398
248	2.47	508.352	1244.74	149.371	553.694	1241.79	76.8211	560.331	1236.25	214.562	631.282	1039.11	-18.5478	641.173	1049.09	295.794	568.272	1013.07	152.091	640.592	670.286	-118.01	364.4	701.514	-106.044	373.405	711.947	-31.3976	278.854	718.887	-54.0419	177.31	688.18	-37.0988	666.801	673.423	392.371	398.948	699.782	424.951	390.141	709.805	351.673	296.207	720.061	385.079	201.162	690.603	376.38
249	2.48	508.284	1244.71	149.347	553.664	1241.76	76.7959	560.333	1236.21	214.537	631.276	1039.07	-18.5815	641.188	1049.09	295.776	568.252	1013.07	152.086	640.581	670.253	-118.013	364.364	701.527	-106.053	373.373	711.958	-31.4071	278.847	718.904	-54.049	177.336	688.197	-37.0924	666.829	673.412	392.355	398.944	699.779	424.952	390.196	709.787	351.657	296.23	720.07	385.079	200.374	691.193	376.411
250	2.49	508.29	1244.64	149.331	553.599	1241.73	76.8175	560.269	1236.14	214.549	631.269	1039.05	-18.5916	641.218	1049.09	295.761	568.33	1013.06	152.102	640.562	670.226	-118.025	364.387	701.529	-106.064	373.447	711.969	-31.4286	278.831	718.924	-54.0264	177.352	688.229	-37.0896	666.85	673.402	392.355	398.924	699.768	424.951	390.229	709.742	351.673	296.236	720.086	385.092	200.182	691.364	376.447
251	2.5	508.271	1244.57	149.371	553.56	1241.67	76.8465	560.259	1236.11	214.53	631.281	1039.01	-18.5766	641.285	1049.1	295.767	568.379	1013.06	152.125	640.571	670.205	-118.047	364.399	701.541	-106.029	373.489	711.982	-31.4264	278.821	718.933	-53.9873	177.365	688.243	-37.0643	666.856	673.408	392.339	398.936	699.764	424.955	390.264	709.708	351.671	296.259	720.079	385.115	200.162	691.406	376.482
252	2.51	508.25	1244.51	149.387	553.553	1241.62	76.8425	560.285	1236.07	214.516	631.323	1038.97	-18.5796	641.31	1049.09	295.759	568.439	1013.04	152.119	640.583	670.197	-118.061	364.392	701.534	-106.006	373.465	711.967	-31.4069	278.846	718.925	-53.9698	177.364	688.221	-37.0269	666.844	673.405	392.323	398.925	699.755	424.967	390.248	709.698	351.681	296.268	720.066	385.128	200.583	691.109	376.49
253	2.52	508.283	1244.38	149.343	553.557	1241.53	76.7864	560.26	1236.05	214.497	631.367	1038.94	-18.598	641.321	1049.07	295.727	568.471	1013.01	152.095	640.588	670.195	-118.065	364.39	701.497	-106.012	373.436	711.94	-31.3904	278.854	718.906	-53.9808	177.352	688.198	-37.0369	666.818	673.38	392.325	398.889	699.737	424.958	390.222	709.684	351.699	296.238	720.075	385.13	201.124	690.706	376.463
254	2.53	508.303	1244.28	149.295	553.592	1241.45	76.7304	560.246	1236.02	214.483	631.381	1038.92	-18.627	641.358	1049.04	295.675	568.525	1012.96	152.062	640.553	670.149	-118.05	364.396	701.468	-106.036	373.436	711.923	-31.4065	278.876	718.879	-54.0209	177.357	688.173	-37.0646	666.805	673.371	392.293	398.899	699.738	424.95	390.296	709.646	351.703	296.219	720.081	385.106	200.403	691.196	376.468
255	2.54	508.286	1244.21	149.269	553.638	1241.4	76.6959	560.258	1236.01	214.456	631.433	1038.9	-18.6433	641.411	1049.03	295.64	568.58	1012.93	152.024	640.573	670.134	-118.035	364.377	701.48	-106.05	373.426	711.916	-31.4142	278.889	718.86	-54.0463	177.408	688.16	-37.0874	666.833	673.383	392.272	398.92	699.752	424.954	390.287	709.678	351.694	296.205	720.073	385.077	200.208	691.317	376.46
256	2.55	508.273	1244.17	149.243	553.626	1241.36	76.6813	560.156	1236.01	214.458	631.508	1038.88	-18.6653	641.466	1049.03	295.627	568.6	1012.95	151.998	640.596	670.116	-118.032	364.395	701.478	-106.058	373.435	711.924	-31.4099	278.875	718.873	-54.0473	177.424	688.172	-37.102	666.858	673.385	392.272	398.968	699.761	424.948	390.305	709.698	351.643	296.221	720.065	385.065	200.582	691.049	376.431
257	2.56	508.28	1244.13	149.23	553.605	1241.33	76.6629	560.065	1236.01	214.468	631.566	1038.85	-18.685	641.501	1049.04	295.598	568.623	1012.98	151.984	640.593	670.087	-118.026	364.403	701.501	-106.059	373.443	711.929	-31.4071	278.868	718.892	-54.0445	177.412	688.187	-37.1114	666.85	673.354	392.252	398.984	699.765	424.932	390.327	709.718	351.623	296.198	720.073	385.073	201.115	690.673	376.414
258	2.57	508.292	1244.1	149.219	553.609	1241.3	76.6408	560.185	1235.96	214.413	631.617	1038.79	-18.7043	641.547	1049.05	295.586	568.639	1013.02	151.992	640.583	670.049	-118.013	364.39	701.508	-106.049	373.438	711.931	-31.4058	278.88	718.904	-54.036	177.408	688.195	-37.0867	666.867	673.352	392.243	398.983	699.761	424.937	390.435	709.653	351.62	296.197	720.075	385.072	200.394	691.215	376.464
259	2.58	508.341	1244.05	149.202	553.636	1241.26	76.6218	560.011	1235.99	214.43	631.65	1038.74	-18.7186	641.593	1049.08	295.584	568.695	1013.05	151.995	640.576	670.025	-117.992	364.402	701.515	-106.036	373.436	711.946	-31.3905	278.873	718.919	-54.0184	177.389	688.218	-37.074	666.85	673.363	392.223	398.976	699.757	424.955	390.435	709.646	351.636	296.257	720.081	385.089	200.678	691.053	376.469
260	2.59	508.357	1244.02	149.197	553.621	1241.23	76.596	560.003	1235.99	214.421	631.7	1038.78	-18.6982	641.627	1049.1	295.577	568.719	1013.09	151.995	640.581	670.032	-117.981	364.424	701.509	-106.031	373.454	711.956	-31.383	278.847	718.937	-54.0045	177.384	688.238	-37.081	666.8	673.357	392.194	398.975	699.774	424.956	390.348	709.679	351.647	296.276	720.093	385.108	201.181	690.716	376.439
261	2.6	508.318	1244	149.177	553.622	1241.21	76.5625	560.01	1236	214.376	631.762	1038.74	-18.7472	641.656	1049.11	295.56	568.733	1013.1	151.971	640.569	670.008	-117.948	364.414	701.501	-106.032	373.466	711.953	-31.4011	278.849	718.935	-54.0007	177.385	688.23	-37.0983	666.805	673.38	392.209	398.983	699.769	424.952	390.266	709.702	351.633	296.217	720.115	385.103	200.855	690.944	376.452
262	2.61	508.323	1243.99	149.146	553.694	1241.19	76.519	559.96	1235.99	214.347	631.75	1038.73	-18.752	641.664	1049.1	295.537	568.768	1013.06	151.934	640.57	669.999	-117.905	364.397	701.515	-106.039	373.46	711.943	-31.4011	278.855	718.91	-54.0028	177.415	688.221	-37.1174	666.824	673.388	392.227	398.957	699.776	424.943	390.201	709.743	351.63	296.213	720.123	385.077	201.619	690.375	376.418
263	2.62	508.442	1243.95	149.113	553.795	1241.18	76.4683	560.051	1236.02	214.31	631.759	1038.76	-18.7084	641.693	1049.09	295.518	568.83	1013	151.914	640.558	669.984	-117.904	364.395	701.511	-106.035	373.447	711.938	-31.3942	278.891	718.89	-54.0301	177.402	688.203	-37.1268	666.818	673.393	392.216	398.974	699.792	424.938	390.21	709.735	351.647	296.227	720.095	385.07	201.808	690.219	376.402
264	2.63	508.509	1243.93	149.072	553.875	1241.15	76.4285	560.143	1236.02	214.285	631.774	1038.71	-18.7547	641.733	1049.08	295.493	568.935	1012.94	151.879	640.55	669.963	-117.883	364.422	701.504	-106.037	373.436	711.93	-31.396	278.923	718.873	-54.0581	177.438	688.208	-37.137	666.825	673.394	392.21	398.982	699.784	424.946	390.328	709.689	351.635	296.235	720.061	385.082	201.89	690.166	376.385
265	2.64	508.549	1243.92	149.049	553.917	1241.13	76.376	560.177	1236.01	214.259	631.789	1038.58	-18.8091	641.747	1049.07	295.476	568.975	1012.91	151.862	640.54	669.931	-117.86	364.433	701.482	-106.041	373.46	711.916	-31.4119	278.918	718.873	-54.0611	177.439	688.216	-37.1321	666.788	673.384	392.203	398.973	699.774	424.955	390.446	709.636	351.631	296.264	720.037	385.077	201.905	690.141	376.394
266	2.65	508.56	1243.93	149.057	553.956	1241.11	76.3539	560.186	1236	214.219	631.813	1038.58	-18.7878	641.755	1049.08	295.471	568.938	1012.94	151.893	640.565	669.908	-117.842	364.406	701.478	-106.018	373.472	711.913	-31.3981	278.907	718.877	-54.0521	177.401	688.228	-37.1003	666.783	673.368	392.215	398.981	699.745	424.954	390.468	709.606	351.634	296.263	720.037	385.098	201.473	690.438	376.417
267	2.66	508.511	1243.97	149.049	554.027	1241.12	76.3239	560.36	1235.97	214.16	631.829	1038.63	-18.7281	641.759	1049.1	295.465	568.919	1012.97	151.919	640.547	669.884	-117.826	364.4	701.485	-105.996	373.461	711.914	-31.3948	278.894	718.894	-54.0182	177.395	688.234	-37.0827	666.785	673.385	392.229	398.98	699.743	424.945	390.492	709.569	351.635	296.234	720.056	385.107	200.494	691.14	376.461
268	2.67	508.54	1244.01	149.017	554.086	1241.14	76.2838	560.672	1235.93	214.066	631.868	1038.63	-18.7173	641.75	1049.11	295.453	568.924	1012.99	151.918	640.549	669.855	-117.832	364.433	701.492	-106.011	373.447	711.926	-31.3942	278.88	718.91	-54.0027	177.376	688.234	-37.0716	666.815	673.432	392.246	398.961	699.739	424.951	390.405	709.623	351.648	296.227	720.071	385.106	200.253	691.341	376.477
269	2.68	508.547	1244.06	148.992	554.117	1241.16	76.2395	560.738	1235.95	214.041	631.855	1038.62	-18.769	641.745	1049.14	295.441	568.877	1013.04	151.887	640.569	669.832	-117.83	364.408	701.496	-105.991	373.449	711.934	-31.4043	278.869	718.923	-54.0057	177.378	688.239	-37.0817	666.88	673.464	392.278	398.969	699.74	424.961	390.377	709.638	351.633	296.244	720.086	385.091	200.174	691.402	376.474
270	2.69	508.599	1244.14	148.95	554.185	1241.17	76.1997	560.754	1235.98	214.008	631.826	1038.58	-18.8112	641.73	1049.16	295.438	568.819	1013.08	151.866	640.56	669.816	-117.814	364.394	701.517	-105.989	373.447	711.949	-31.4093	278.869	718.931	-54.0136	177.4	688.24	-37.085	666.885	673.471	392.279	398.981	699.781	424.966	390.317	709.703	351.659	296.244	720.102	385.086	200.132	691.428	376.476
271	2.7	508.621	1244.17	148.903	554.274	1241.19	76.1436	560.821	1236	213.966	631.821	1038.57	-18.8354	641.722	1049.17	295.423	568.864	1013.07	151.847	640.535	669.795	-117.792	364.404	701.548	-106.012	373.449	711.957	-31.4172	278.887	718.93	-54.0289	177.413	688.252	-37.11	666.833	673.453	392.29	398.974	699.801	424.957	390.169	709.764	351.674	296.217	720.11	385.069	200.097	691.442	376.456
272	2.71	508.686	1244.19	148.826	554.365	1241.2	76.0668	560.877	1236.02	213.924	631.82	1038.51	-18.8876	641.712	1049.17	295.39	568.937	1013	151.763	640.523	669.777	-117.761	364.421	701.532	-106.031	373.442	711.954	-31.4126	278.896	718.917	-54.0521	177.419	688.259	-37.1341	666.838	673.474	392.312	398.996	699.821	424.948	390.233	709.751	351.644	296.212	720.105	385.045	200.53	691.119	376.421
273	2.72	508.806	1244.18	148.751	554.435	1241.2	76.002	560.929	1236.05	213.884	631.836	1038.52	-18.8889	641.726	1049.15	295.361	568.937	1012.98	151.723	640.515	669.764	-117.762	364.435	701.5	-106.04	373.443	711.935	-31.4286	278.908	718.902	-54.0655	177.426	688.247	-37.1369	666.864	673.51	392.324	398.982	699.838	424.957	390.304	709.733	351.624	296.218	720.093	385.035	201.098	690.705	376.401
274	2.73	508.932	1244.19	148.728	554.482	1241.2	75.973	560.93	1236.06	213.835	631.835	1038.54	-18.868	641.749	1049.14	295.351	568.979	1012.94	151.718	640.503	669.733	-117.763	364.413	701.481	-106.025	373.468	711.904	-31.4215	278.92	718.879	-54.0588	177.396	688.221	-37.1181	666.846	673.482	392.345	398.978	699.828	424.967	390.295	709.713	351.628	296.223	720.066	385.057	200.813	690.9	376.42
275	2.74	508.995	1244.2	148.708	554.555	1241.21	75.9537	561.035	1236.05	213.786	631.865	1038.46	-18.8995	641.767	1049.14	295.349	569.035	1012.92	151.735	640.482	669.698	-117.779	364.442	701.472	-106.023	373.475	711.9	-31.4183	278.927	718.874	-54.0523	177.424	688.193	-37.1131	666.841	673.481	392.351	398.97	699.791	424.978	390.323	709.669	351.66	296.259	720.035	385.088	201.642	690.312	376.401
276	2.75	509.092	1244.2	148.675	554.642	1241.21	75.9207	561.076	1236.04	213.751	631.866	1038.45	-18.9118	641.791	1049.16	295.335	569.019	1012.95	151.768	640.514	669.698	-117.8	364.45	701.461	-106.014	373.471	711.895	-31.3974	278.932	718.872	-54.0309	177.443	688.194	-37.1096	666.855	673.48	392.351	398.979	699.769	424.975	390.389	709.62	351.67	296.279	720.042	385.097	201.428	690.479	376.43
277	2.76	509.142	1244.22	148.619	554.673	1241.21	75.8872	561.051	1236.05	213.717	631.816	1038.45	-18.8742	641.774	1049.16	295.32	568.976	1012.97	151.762	640.534	669.701	-117.785	364.412	701.469	-105.991	373.482	711.905	-31.389	278.92	718.888	-54.0157	177.419	688.19	-37.0775	666.877	673.488	392.366	398.973	699.761	424.963	390.385	709.596	351.655	296.279	720.038	385.098	200.925	690.842	376.463
278	2.77	509.171	1244.25	148.581	554.688	1241.23	75.8586	561.059	1236.09	213.672	631.836	1038.43	-18.8857	641.775	1049.17	295.307	568.953	1012.97	151.738	640.526	669.688	-117.768	364.408	701.48	-105.989	373.495	711.915	-31.4011	278.895	718.897	-54.0129	177.465	688.191	-37.0941	666.877	673.51	392.358	398.948	699.782	424.971	390.41	709.595	351.644	296.253	720.044	385.094	201.666	690.338	376.436
279	2.78	509.201	1244.27	148.541	554.758	1241.26	75.7858	561.112	1236.12	213.623	631.869	1038.46	-18.9066	641.767	1049.18	295.289	568.95	1012.97	151.711	640.507	669.68	-117.784	364.397	701.492	-106.002	373.475	711.92	-31.411	278.883	718.907	-54.0123	177.49	688.213	-37.1232	666.867	673.527	392.35	398.982	699.81	424.969	390.36	709.64	351.637	296.272	720.056	385.1	201.429	690.531	376.438
280	2.79	509.254	1244.28	148.494	554.837	1241.28	75.7243	561.172	1236.17	213.564	631.869	1038.47	-18.9647	641.754	1049.18	295.284	568.922	1012.98	151.69	640.512	669.683	-117.799	364.388	701.501	-106.012	373.481	711.916	-31.4242	278.897	718.922	-54.0187	177.468	688.235	-37.1293	666.891	673.561	392.346	398.985	699.824	424.949	390.34	709.668	351.633	296.238	720.082	385.084	200.482	691.19	376.452
281	2.8	509.312	1244.29	148.449	554.849	1241.29	75.6892	561.2	1236.22	213.524	631.829	1038.48	-18.9597	641.743	1049.18	295.284	568.878	1012.96	151.68	640.536	669.691	-117.797	364.409	701.493	-106.011	373.459	711.933	-31.4198	278.88	718.924	-54.0366	177.441	688.249	-37.1227	666.883	673.559	392.323	398.947	699.822	424.946	390.232	709.7	351.65	296.187	720.113	385.071	200.222	691.359	376.448
282	2.81	509.517	1244.26	148.368	554.878	1241.29	75.652	561.228	1236.25	213.511	631.838	1038.42	-19.003	641.743	1049.17	295.283	568.913	1012.9	151.665	640.535	669.68	-117.812	364.412	701.485	-106.021	373.429	711.937	-31.4049	278.883	718.9	-54.0499	177.429	688.237	-37.1256	666.814	673.513	392.291	398.959	699.821	424.94	390.185	709.733	351.652	296.191	720.098	385.061	200.17	691.383	376.439
283	2.82	509.622	1244.24	148.303	554.936	1241.27	75.5905	561.277	1236.25	213.456	631.86	1038.38	-19.0186	641.757	1049.16	295.268	568.971	1012.87	151.633	640.513	669.637	-117.835	364.42	701.491	-106.038	373.439	711.923	-31.4174	278.891	718.897	-54.0723	177.417	688.212	-37.1199	666.787	673.495	392.263	398.976	699.809	424.94	390.303	709.688	351.618	296.241	720.08	385.043	200.172	691.37	376.433
284	2.83	509.607	1244.25	148.248	554.957	1241.27	75.5511	561.289	1236.25	213.416	631.848	1038.35	-19.0526	641.761	1049.16	295.247	568.938	1012.86	151.616	640.519	669.615	-117.827	364.415	701.48	-106.06	373.448	711.914	-31.4296	278.893	718.904	-54.0833	177.437	688.215	-37.1478	666.819	673.507	392.251	398.958	699.79	424.917	390.425	709.646	351.572	296.258	720.067	385.039	200.155	691.377	376.419
285	2.84	509.592	1244.25	148.232	554.962	1241.27	75.541	561.307	1236.25	213.377	631.819	1038.38	-19.016	641.758	1049.16	295.256	568.905	1012.87	151.647	640.54	669.621	-117.801	364.412	701.487	-106.042	373.425	711.913	-31.4007	278.896	718.908	-54.0684	177.451	688.219	-37.1525	666.861	673.515	392.27	398.953	699.783	424.908	390.356	709.681	351.608	296.267	720.066	385.052	200.175	691.37	376.433
286	2.85	509.628	1244.25	148.222	554.978	1241.26	75.5297	561.337	1236.25	213.356	631.869	1038.42	-18.9973	641.786	1049.17	295.264	568.892	1012.9	151.684	640.536	669.626	-117.801	364.431	701.481	-106.015	373.446	711.924	-31.3896	278.874	718.911	-54.0356	177.451	688.216	-37.1283	666.842	673.491	392.261	398.999	699.794	424.932	390.288	709.719	351.655	296.271	720.057	385.075	200.201	691.38	376.465
287	2.86	509.712	1244.23	148.175	554.996	1241.24	75.4903	561.368	1236.23	213.352	631.911	1038.39	-19.0449	641.811	1049.17	295.253	568.939	1012.92	151.667	640.548	669.631	-117.811	364.426	701.48	-106.012	373.473	711.922	-31.4094	278.9	718.909	-54.0388	177.426	688.217	-37.1131	666.881	673.508	392.268	399.021	699.784	424.942	390.25	709.715	351.657	296.268	720.051	385.068	200.215	691.39	376.482
288	2.87	509.736	1244.22	148.124	555.018	1241.21	75.4545	561.359	1236.25	213.309	631.93	1038.39	-19.0732	641.82	1049.16	295.225	568.941	1012.94	151.626	640.574	669.637	-117.801	364.416	701.472	-106.021	373.483	711.912	-31.4093	278.916	718.899	-54.0527	177.412	688.228	-37.1046	666.893	673.516	392.285	399.007	699.784	424.93	390.297	709.679	351.624	296.256	720.054	385.04	200.194	691.391	376.473
289	2.88	509.762	1244.2	148.081	555.04	1241.2	75.4315	561.324	1236.26	213.261	631.955	1038.42	-19.0874	641.846	1049.16	295.201	568.959	1012.93	151.605	640.565	669.644	-117.792	364.424	701.469	-106.037	373.511	711.91	-31.4139	278.93	718.902	-54.0492	177.429	688.23	-37.111	666.856	673.502	392.293	398.981	699.797	424.939	390.348	709.623	351.607	296.242	720.071	385.051	200.182	691.403	376.471
290	2.89	509.789	1244.19	148.082	555.052	1241.17	75.4349	561.32	1236.23	213.266	631.942	1038.45	-19.0424	641.867	1049.17	295.199	569.01	1012.91	151.632	640.529	669.638	-117.805	364.44	701.463	-106.016	373.517	711.907	-31.408	278.918	718.915	-54.0233	177.424	688.232	-37.1084	666.798	673.5	392.29	398.969	699.793	424.959	390.401	709.607	351.621	296.228	720.072	385.082	200.615	691.088	376.465
291	2.9	509.799	1244.16	148.085	555.04	1241.16	75.4186	561.319	1236.23	213.267	631.934	1038.43	-19.0616	641.894	1049.17	295.186	569.032	1012.9	151.63	640.485	669.619	-117.826	364.445	701.45	-106.028	373.5	711.906	-31.4112	278.901	718.909	-54.0256	177.394	688.241	-37.093	666.795	673.507	392.294	398.95	699.795	424.952	390.409	709.611	351.647	296.234	720.081	385.094	201.165	690.708	376.444
292	2.91	509.749	1244.13	148.068	555.041	1241.13	75.3846	561.363	1236.21	213.241	631.926	1038.43	-19.0744	641.935	1049.17	295.163	569.025	1012.88	151.586	640.481	669.614	-117.818	364.425	701.46	-106.046	373.473	711.908	-31.4295	278.913	718.898	-54.0454	177.371	688.23	-37.1059	666.839	673.534	392.322	398.902	699.808	424.932	390.301	709.666	351.664	296.226	720.09	385.087	200.849	690.919	376.44
293	2.92	509.774	1244.1	148.026	555.083	1241.1	75.3707	561.404	1236.21	213.228	631.955	1038.37	-19.1275	641.971	1049.16	295.125	569.03	1012.88	151.554	640.548	669.62	-117.812	364.415	701.465	-106.063	373.491	711.916	-31.4589	278.907	718.894	-54.0651	177.406	688.213	-37.1156	666.858	673.539	392.33	398.907	699.822	424.933	390.266	709.701	351.66	296.251	720.069	385.061	201.618	690.35	376.397
294	2.93	509.821	1244.07	147.989	555.117	1241.1	75.3491	561.409	1236.19	213.207	632.029	1038.34	-19.1665	642.012	1049.17	295.1	569.081	1012.88	151.537	640.548	669.586	-117.839	364.426	701.459	-106.061	373.514	711.922	-31.4646	278.914	718.902	-54.0683	177.402	688.217	-37.1241	666.825	673.52	392.317	398.925	699.824	424.952	390.275	709.688	351.629	296.258	720.066	385.052	201.381	690.516	376.404
295	2.94	509.794	1244.08	147.997	555.08	1241.1	75.339	561.423	1236.15	213.205	632.067	1038.34	-19.1624	642.022	1049.18	295.085	569.066	1012.88	151.533	640.524	669.545	-117.853	364.423	701.453	-106.073	373.479	711.93	-31.452	278.877	718.922	-54.0676	177.369	688.251	-37.117	666.835	673.525	392.299	398.93	699.828	424.945	390.255	709.714	351.629	296.242	720.058	385.072	200.898	690.874	376.416
296	2.95	509.746	1244.08	148.011	555.048	1241.1	75.3506	561.46	1236.14	213.187	632.09	1038.36	-19.1807	642.05	1049.19	295.059	569.008	1012.92	151.504	640.548	669.511	-117.861	364.397	701.482	-106.082	373.477	711.941	-31.448	278.877	718.925	-54.0746	177.388	688.254	-37.1384	666.861	673.541	392.283	398.949	699.808	424.921	390.188	709.738	351.641	296.253	720.063	385.056	201.652	690.34	376.382
297	2.96	509.747	1244.05	148.023	555.059	1241.09	75.3654	561.514	1236.12	213.189	632.153	1038.3	-19.2221	642.098	1049.19	295.047	569.03	1012.93	151.498	640.556	669.476	-117.839	364.418	701.478	-106.052	373.482	711.955	-31.4463	278.901	718.921	-54.0757	177.445	688.255	-37.1359	666.888	673.56	392.27	399.015	699.793	424.928	390.227	709.719	351.626	296.28	720.073	385.068	201.858	690.202	376.386
298	2.97	509.734	1244.04	148.058	555.056	1241.07	75.3897	561.52	1236.1	213.208	632.17	1038.28	-19.1995	642.129	1049.21	295.043	569.059	1012.93	151.522	640.573	669.451	-117.826	364.451	701.474	-106.047	373.506	711.948	-31.4336	278.904	718.928	-54.0503	177.452	688.265	-37.1292	666.86	673.552	392.259	399.044	699.804	424.936	390.28	709.716	351.62	296.287	720.078	385.1	201.502	690.475	376.421
299	2.98	509.71	1244.03	148.085	555.044	1241.07	75.3978	561.497	1236.07	213.202	632.161	1038.25	-19.1972	642.138	1049.21	295.016	569.047	1012.92	151.529	640.576	669.465	-117.828	364.44	701.459	-106.04	373.473	711.94	-31.42	278.895	718.93	-54.0278	177.467	688.239	-37.1287	666.833	673.546	392.24	398.994	699.811	424.944	390.34	709.683	351.628	296.288	720.069	385.097	200.525	691.161	376.474
300	2.99	509.741	1243.99	148.061	555.043	1241.05	75.3818	561.483	1236.04	213.174	632.119	1038.26	-19.2171	642.141	1049.21	294.982	569.03	1012.89	151.478	640.563	669.476	-117.817	364.426	701.444	-106.027	373.458	711.936	-31.4119	278.914	718.917	-54.0395	177.429	688.237	-37.1118	666.812	673.562	392.235	398.963	699.802	424.941	390.339	709.659	351.636	296.265	720.052	385.079	200.269	691.329	376.474
301	3	509.774	1243.96	148.056	555.061	1241.04	75.3685	561.475	1236.02	213.184	632.089	1038.27	-19.2139	642.173	1049.21	294.966	569.067	1012.87	151.464	640.534	669.442	-117.795	364.422	701.438	-106.007	373.493	711.914	-31.4221	278.907	718.905	-54.0336	177.454	688.211	-37.1122	666.849	673.588	392.253	398.95	699.806	424.948	390.354	709.638	351.637	296.268	720.069	385.076	200.196	691.372	376.479
302	3.01	509.741	1243.97	148.07	555.034	1241.02	75.3588	561.433	1236.05	213.183	632.105	1038.2	-19.2648	642.187	1049.21	294.958	569.109	1012.87	151.486	640.505	669.411	-117.767	364.44	701.432	-106.015	373.51	711.905	-31.4233	278.902	718.902	-54.0389	177.493	688.203	-37.1166	666.845	673.585	392.246	398.962	699.825	424.949	390.357	709.656	351.654	296.255	720.072	385.079	200.184	691.387	376.49
303	3.02	509.75	1243.93	148.054	555.014	1241.01	75.324	561.408	1236.07	213.167	632.125	1038.21	-19.275	642.176	1049.22	294.945	569.088	1012.87	151.469	640.49	669.396	-117.753	364.451	701.448	-106.021	373.51	711.913	-31.4163	278.9	718.903	-54.0493	177.414	688.222	-37.0954	666.809	673.566	392.213	398.972	699.828	424.94	390.262	709.691	351.651	296.228	720.077	385.07	200.193	691.395	376.472
304	3.03	509.749	1243.91	148.02	554.996	1241.01	75.2955	561.513	1236.07	213.132	632.156	1038.22	-19.2852	642.193	1049.23	294.929	569.076	1012.87	151.425	640.507	669.368	-117.747	364.448	701.449	-106.029	373.517	711.911	-31.4428	278.912	718.908	-54.0728	177.383	688.248	-37.135	666.795	673.564	392.198	398.985	699.832	424.916	390.28	709.694	351.616	296.218	720.071	385.054	200.176	691.404	376.445
305	3.04	509.77	1243.92	147.978	555.006	1241.01	75.2838	561.677	1236.08	213.088	632.156	1038.24	-19.2738	642.218	1049.23	294.92	569.075	1012.88	151.418	640.539	669.369	-117.729	364.488	701.453	-106.043	373.525	711.913	-31.4528	278.93	718.902	-54.0705	177.44	688.243	-37.1618	666.834	673.584	392.217	399.006	699.841	424.923	390.424	709.651	351.594	296.262	720.064	385.06	200.623	691.092	376.427
306	3.05	509.817	1243.93	147.974	554.986	1241	75.274	561.656	1236.09	213.065	632.157	1038.3	-19.2507	642.202	1049.24	294.937	569.072	1012.89	151.424	640.526	669.355	-117.734	364.473	701.472	-106.035	373.488	711.925	-31.4443	278.913	718.919	-54.0558	177.456	688.256	-37.1419	666.834	673.591	392.218	399.008	699.844	424.921	390.384	709.664	351.615	296.275	720.075	385.076	201.157	690.714	376.439
307	3.06	509.796	1243.96	147.958	554.939	1241	75.2464	561.53	1236.11	213.048	632.128	1038.25	-19.3012	642.169	1049.24	294.946	569.042	1012.92	151.433	640.472	669.32	-117.734	364.41	701.498	-106.036	373.497	711.935	-31.4558	278.887	718.934	-54.0536	177.416	688.272	-37.1479	666.816	673.59	392.218	398.989	699.842	424.915	390.22	709.715	351.638	296.26	720.085	385.092	200.846	690.937	376.46
308	3.07	509.791	1243.95	147.905	554.928	1240.99	75.2257	561.53	1236.13	213.017	632.065	1038.22	-19.3135	642.15	1049.24	294.924	569.012	1012.92	151.408	640.471	669.335	-117.724	364.402	701.497	-106.046	373.49	711.938	-31.4648	278.892	718.93	-54.07	177.415	688.248	-37.1418	666.82	673.603	392.21	398.97	699.828	424.906	390.22	709.71	351.613	296.257	720.081	385.067	201.175	690.676	376.432
309	3.08	509.8	1243.92	147.894	554.954	1240.96	75.211	561.625	1236.11	212.996	632.088	1038.24	-19.2996	642.133	1049.23	294.918	569.04	1012.89	151.39	640.52	669.368	-117.737	364.433	701.459	-106.026	373.503	711.919	-31.4474	278.917	718.915	-54.0786	177.422	688.244	-37.1292	666.85	673.614	392.21	398.957	699.821	424.908	390.362	709.664	351.595	296.26	720.074	385.057	200.412	691.226	376.454
310	3.09	509.769	1243.89	147.894	554.944	1240.94	75.2107	561.618	1236.09	212.971	632.065	1038.29	-19.2374	642.102	1049.23	294.93	569.049	1012.87	151.399	640.515	669.37	-117.751	364.425	701.449	-106.032	373.49	711.927	-31.4418	278.921	718.917	-54.0618	177.425	688.232	-37.118	666.834	673.601	392.223	398.95	699.818	424.919	390.369	709.663	351.608	296.236	720.075	385.07	200.647	691.053	376.449
311	3.1	509.808	1243.89	147.866	554.914	1240.93	75.1708	561.597	1236.1	212.965	632.024	1038.28	-19.2516	642.061	1049.23	294.94	569.064	1012.86	151.401	640.506	669.385	-117.764	364.431	701.448	-106.049	373.488	711.926	-31.4449	278.922	718.912	-54.064	177.402	688.218	-37.1159	666.798	673.601	392.233	398.924	699.812	424.924	390.293	709.673	351.624	296.236	720.085	385.07	201.112	690.69	376.429
312	3.11	509.892	1243.87	147.841	554.929	1240.91	75.1569	561.609	1236.1	212.955	632.037	1038.22	-19.3043	642.051	1049.23	294.934	569.112	1012.83	151.385	640.512	669.391	-117.782	364.454	701.434	-106.046	373.482	711.924	-31.4379	278.923	718.898	-54.0774	177.425	688.201	-37.1394	666.797	673.61	392.225	398.958	699.816	424.93	390.217	709.7	351.647	296.24	720.095	385.049	200.375	691.21	376.453
313	3.12	509.91	1243.85	147.842	554.968	1240.9	75.1444	561.64	1236.1	212.923	632.055	1038.22	-19.3075	642.053	1049.23	294.922	569.129	1012.8	151.374	640.527	669.387	-117.789	364.464	701.429	-106.036	373.506	711.92	-31.4511	278.952	718.884	-54.0767	177.42	688.201	-37.1281	666.83	673.628	392.219	398.974	699.817	424.928	390.31	709.681	351.637	296.249	720.077	385.054	200.236	691.339	376.465
314	3.13	509.951	1243.86	147.815	554.96	1240.9	75.1299	561.67	1236.08	212.942	632.015	1038.26	-19.2794	642.061	1049.25	294.917	569.065	1012.82	151.368	640.502	669.368	-117.762	364.461	701.426	-106.022	373.513	711.919	-31.4569	278.94	718.883	-54.0743	177.461	688.202	-37.138	666.861	673.638	392.232	398.967	699.821	424.921	390.365	709.657	351.637	296.242	720.067	385.066	200.18	691.359	376.479
315	3.14	509.901	1243.89	147.82	554.933	1240.91	75.1176	561.61	1236.06	212.927	632.028	1038.21	-19.3369	642.053	1049.25	294.911	568.99	1012.87	151.361	640.511	669.348	-117.769	364.454	701.433	-106.049	373.508	711.925	-31.4562	278.914	718.906	-54.0682	177.427	688.217	-37.1376	666.846	673.619	392.239	398.968	699.822	424.915	390.316	709.685	351.653	296.232	720.082	385.083	200.565	691.075	376.456
316	3.15	509.857	1243.9	147.828	554.915	1240.91	75.1002	561.578	1236.05	212.882	632.014	1038.2	-19.34	642.052	1049.26	294.895	568.962	1012.9	151.371	640.528	669.323	-117.794	364.421	701.441	-106.045	373.497	711.925	-31.4672	278.888	718.922	-54.0602	177.41	688.228	-37.1299	666.813	673.621	392.262	398.982	699.824	424.918	390.22	709.709	351.644	296.234	720.071	385.074	201.566	690.385	376.404
317	3.16	509.893	1243.87	147.801	554.893	1240.89	75.0924	561.661	1236.05	212.857	632	1038.2	-19.3113	642.079	1049.27	294.888	568.968	1012.9	151.366	640.534	669.309	-117.807	364.416	701.453	-106.037	373.527	711.932	-31.4595	278.898	718.923	-54.063	177.45	688.222	-37.1198	666.837	673.646	392.277	398.999	699.836	424.919	390.19	709.71	351.628	296.236	720.059	385.067	201.834	690.206	376.402
318	3.17	509.855	1243.85	147.76	554.909	1240.88	75.0585	561.606	1236.06	212.854	631.97	1038.22	-19.3069	642.079	1049.27	294.871	568.979	1012.89	151.321	640.51	669.283	-117.783	364.437	701.457	-106.059	373.524	711.926	-31.4506	278.9	718.918	-54.0692	177.47	688.222	-37.1506	666.847	673.658	392.285	398.968	699.843	424.919	390.227	709.707	351.63	296.245	720.056	385.058	201.452	690.469	376.423
319	3.18	509.841	1243.82	147.726	554.903	1240.87	75.0441	561.528	1236.08	212.834	631.951	1038.21	-19.3229	642.059	1049.27	294.856	568.995	1012.89	151.302	640.482	669.273	-117.765	364.419	701.442	-106.092	373.533	711.931	-31.4652	278.89	718.935	-54.0832	177.437	688.236	-37.1563	666.84	673.663	392.311	398.943	699.852	424.907	390.157	709.744	351.64	296.217	720.064	385.046	200.911	690.853	376.418
320	3.19	509.847	1243.8	147.738	554.873	1240.86	75.0396	561.566	1236.07	212.843	631.995	1038.24	-19.3296	642.035	1049.29	294.856	569.005	1012.89	151.314	640.499	669.29	-117.777	364.408	701.442	-106.089	373.531	711.932	-31.4541	278.887	718.933	-54.0803	177.425	688.239	-37.1409	666.833	673.697	392.314	398.982	699.871	424.932	390.216	709.742	351.629	296.187	720.096	385.043	201.198	690.66	376.415
321	3.2	509.874	1243.79	147.748	554.867	1240.84	75.043	561.604	1236.04	212.859	632.03	1038.19	-19.381	642.044	1049.3	294.857	569.045	1012.89	151.32	640.515	669.303	-117.751	364.453	701.443	-106.049	373.527	711.929	-31.4429	278.917	718.92	-54.0667	177.45	688.235	-37.1269	666.852	673.714	392.301	398.98	699.864	424.941	390.381	709.655	351.61	296.226	720.095	385.044	200.391	691.231	376.462
322	3.21	509.911	1243.76	147.737	554.872	1240.81	75.0468	561.581	1236.03	212.86	632.015	1038.21	-19.3895	642.04	1049.3	294.854	569.065	1012.89	151.322	640.496	669.282	-117.708	364.475	701.448	-106.033	373.54	711.921	-31.4578	278.94	718.906	-54.0746	177.456	688.224	-37.1345	666.831	673.696	392.308	398.95	699.866	424.95	390.428	709.633	351.616	296.242	720.103	385.056	200.18	691.377	376.463
323	3.22	509.952	1243.72	147.714	554.85	1240.77	75.0364	561.598	1236	212.853	632.022	1038.24	-19.3519	642.057	1049.3	294.851	569.046	1012.9	151.314	640.471	669.258	-117.697	364.441	701.446	-106.033	373.525	711.91	-31.4513	278.921	718.9	-54.0742	177.416	688.237	-37.1245	666.825	673.684	392.316	398.919	699.867	424.949	390.417	709.634	351.609	296.209	720.092	385.066	200.145	691.391	376.47
324	3.23	509.976	1243.69	147.701	554.823	1240.74	75.0266	561.615	1235.94	212.848	632.019	1038.24	-19.3258	642.074	1049.29	294.845	569.025	1012.91	151.326	640.469	669.233	-117.685	364.423	701.432	-106.031	373.523	711.915	-31.4446	278.922	718.89	-54.0662	177.416	688.226	-37.1395	666.845	673.704	392.291	398.932	699.86	424.942	390.513	709.615	351.606	296.218	720.076	385.065	200.612	691.068	376.46
325	3.24	509.973	1243.66	147.702	554.81	1240.7	75.0251	561.591	1235.9	212.855	632.042	1038.21	-19.3307	642.085	1049.29	294.832	569.058	1012.9	151.326	640.459	669.202	-117.7	364.445	701.422	-106.039	373.49	711.908	-31.4323	278.93	718.895	-54.0719	177.462	688.215	-37.1352	666.824	673.701	392.288	398.948	699.844	424.943	390.469	709.616	351.611	296.226	720.054	385.081	201.162	690.68	376.445
326	3.25	509.923	1243.63	147.709	554.775	1240.67	75.0229	561.618	1235.92	212.855	632.06	1038.18	-19.3546	642.095	1049.29	294.826	569.052	1012.92	151.308	640.451	669.178	-117.686	364.456	701.409	-106.017	373.46	711.913	-31.4301	278.914	718.904	-54.0765	177.482	688.223	-37.1346	666.825	673.693	392.286	398.944	699.835	424.935	390.365	709.631	351.603	296.213	720.068	385.078	200.846	690.9	376.445
327	3.26	509.848	1243.62	147.723	554.731	1240.65	75.0187	561.634	1235.91	212.837	632.059	1038.18	-19.3559	642.103	1049.3	294.823	569.006	1012.96	151.314	640.488	669.167	-117.664	364.439	701.44	-106.012	373.457	711.924	-31.4266	278.892	718.922	-54.0676	177.397	688.232	-37.1064	666.839	673.692	392.278	398.949	699.836	424.924	390.305	709.681	351.618	296.19	720.078	385.085	201.195	690.65	376.434
328	3.27	509.881	1243.58	147.715	554.741	1240.61	75.0135	561.641	1235.9	212.828	632.125	1038.13	-19.4018	642.112	1049.3	294.815	569.049	1012.93	151.29	640.489	669.169	-117.656	364.427	701.459	-106.016	373.487	711.925	-31.4374	278.907	718.93	-54.0754	177.409	688.232	-37.13	666.839	673.691	392.263	399.005	699.844	424.928	390.316	709.69	351.613	296.219	720.07	385.076	200.438	691.214	376.471
329	3.28	510.01	1243.49	147.692	554.773	1240.58	74.9947	561.689	1235.92	212.817	632.144	1038.11	-19.4115	642.175	1049.3	294.786	569.127	1012.91	151.258	640.481	669.172	-117.652	364.44	701.453	-106.038	373.516	711.923	-31.4545	278.93	718.914	-54.0831	177.437	688.255	-37.1498	666.838	673.691	392.251	399.009	699.85	424.931	390.37	709.666	351.6	296.24	720.076	385.061	200.718	691.028	376.445
330	3.29	510.043	1243.44	147.657	554.755	1240.55	74.9837	561.728	1235.91	212.81	632.184	1038.13	-19.4211	642.198	1049.31	294.785	569.109	1012.92	151.248	640.505	669.178	-117.645	364.448	701.443	-106.041	373.48	711.922	-31.4476	278.939	718.91	-54.097	177.431	688.248	-37.1592	666.861	673.694	392.256	399.003	699.865	424.921	390.337	709.66	351.591	296.227	720.083	385.044	201.201	690.675	376.402
331	3.3	509.959	1243.44	147.669	554.707	1240.53	75.0008	561.804	1235.87	212.82	632.16	1038.2	-19.3653	642.19	1049.32	294.789	569.104	1012.95	151.228	640.486	669.166	-117.647	364.436	701.465	-106.038	373.488	711.926	-31.4561	278.929	718.924	-54.0921	177.461	688.24	-37.1663	666.883	673.69	392.257	398.978	699.874	424.901	390.234	709.699	351.613	296.198	720.093	385.043	200.418	691.227	376.416
332	3.31	509.886	1243.41	147.725	554.673	1240.49	74.9982	561.787	1235.83	212.837	632.213	1038.2	-19.3788	642.195	1049.32	294.778	569.114	1012.97	151.238	640.474	669.168	-117.662	364.413	701.478	-106.03	373.495	711.948	-31.4659	278.922	718.95	-54.0809	177.455	688.24	-37.1628	666.85	673.688	392.239	398.933	699.884	424.909	390.239	709.71	351.619	296.222	720.105	385.049	200.211	691.38	376.447
333	3.32	509.927	1243.34	147.74	554.645	1240.45	75.0081	561.715	1235.81	212.848	632.275	1038.16	-19.4368	642.203	1049.32	294.775	569.068	1013	151.265	640.486	669.18	-117.65	364.432	701.471	-106.038	373.524	711.949	-31.4773	278.908	718.957	-54.0702	177.441	688.231	-37.1481	666.859	673.711	392.229	398.954	699.876	424.905	390.239	709.685	351.608	296.251	720.114	385.043	200.162	691.424	376.475
334	3.33	509.897	1243.26	147.741	554.624	1240.4	75.0132	561.774	1235.78	212.835	632.232	1038.15	-19.4268	642.218	1049.32	294.777	569.025	1013.02	151.277	640.507	669.177	-117.647	364.428	701.452	-106.026	373.529	711.933	-31.4613	278.894	718.943	-54.0612	177.419	688.251	-37.1385	666.856	673.689	392.236	398.963	699.868	424.907	390.248	709.672	351.6	296.233	720.102	385.048	200.141	691.423	376.471
335	3.34	509.932	1243.18	147.768	554.627	1240.33	75.0116	561.829	1235.74	212.848	632.192	1038.2	-19.3671	642.229	1049.31	294.773	569.084	1012.98	151.27	640.519	669.164	-117.661	364.434	701.436	-106.022	373.522	711.922	-31.446	278.899	718.93	-54.0575	177.401	688.246	-37.133	666.821	673.67	392.246	398.945	699.839	424.921	390.315	709.651	351.599	296.241	720.072	385.072	200.585	691.086	376.453
336	3.35	510.023	1243.08	147.789	554.625	1240.26	75.0119	561.823	1235.68	212.896	632.219	1038.21	-19.3519	642.25	1049.3	294.768	569.18	1012.91	151.26	640.501	669.143	-117.662	364.424	701.418	-106.004	373.501	711.904	-31.4204	278.94	718.894	-54.0546	177.421	688.186	-37.1225	666.821	673.671	392.254	398.972	699.833	424.934	390.471	709.629	351.617	296.252	720.062	385.076	201.164	690.675	376.444
337	3.36	510.025	1242.95	147.784	554.628	1240.18	74.9975	561.81	1235.63	212.897	632.247	1038.19	-19.3888	642.282	1049.3	294.746	569.218	1012.9	151.226	640.521	669.14	-117.679	364.425	701.414	-105.999	373.483	711.887	-31.4236	278.968	718.875	-54.0698	177.445	688.177	-37.1415	666.833	673.657	392.238	398.996	699.84	424.927	390.481	709.617	351.625	296.249	720.051	385.062	200.877	690.886	376.445
338	3.37	509.983	1242.85	147.768	554.582	1240.13	74.9841	561.862	1235.6	212.898	632.262	1038.13	-19.4354	642.279	1049.29	294.736	569.202	1012.91	151.192	640.545	669.158	-117.702	364.442	701.425	-106.018	373.484	711.902	-31.4516	278.949	718.882	-54.0895	177.463	688.185	-37.1578	666.829	673.65	392.242	398.991	699.859	424.911	390.423	709.628	351.609	296.205	720.05	385.057	201.205	690.632	376.416
339	3.38	509.893	1242.78	147.799	554.542	1240.09	75.0117	561.853	1235.58	212.87	632.212	1038.15	-19.4068	642.278	1049.3	294.743	569.125	1012.98	151.216	640.516	669.164	-117.672	364.438	701.434	-106.032	373.477	711.926	-31.4496	278.94	718.908	-54.0919	177.424	688.22	-37.1419	666.838	673.672	392.261	398.96	699.883	424.927	390.285	709.662	351.594	296.201	720.062	385.047	200.397	691.205	376.441
340	3.39	509.864	1242.69	147.818	554.525	1240.05	75.0307	561.839	1235.54	212.896	632.217	1038.14	-19.4271	642.27	1049.31	294.745	569.048	1013.05	151.258	640.508	669.181	-117.668	364.442	701.452	-106.04	373.505	711.933	-31.4514	278.917	718.932	-54.0621	177.404	688.244	-37.1379	666.87	673.728	392.261	398.93	699.891	424.939	390.18	709.702	351.611	296.227	720.075	385.062	200.641	691.053	376.449
341	3.4	509.847	1242.57	147.823	554.5	1239.99	75.0078	561.877	1235.48	212.912	632.235	1038.18	-19.4115	642.279	1049.32	294.734	569.051	1013.08	151.263	640.48	669.18	-117.695	364.428	701.446	-106.038	373.486	711.942	-31.4578	278.904	718.931	-54.0609	177.398	688.259	-37.1334	666.851	673.716	392.251	398.915	699.889	424.929	390.281	709.695	351.607	296.207	720.105	385.046	201.131	690.722	376.439
342	3.41	509.855	1242.41	147.788	554.5	1239.92	74.9772	561.896	1235.42	212.879	632.274	1038.19	-19.4374	642.288	1049.32	294.729	569.064	1013.06	151.244	640.458	669.181	-117.711	364.431	701.454	-106.045	373.508	711.941	-31.4849	278.901	718.918	-54.081	177.423	688.26	-37.1647	666.85	673.711	392.25	398.908	699.887	424.908	390.379	709.643	351.582	296.17	720.125	385.028	200.824	690.946	376.437
343	3.42	509.833	1242.27	147.771	554.51	1239.83	74.9837	561.88	1235.36	212.898	632.267	1038.19	-19.4203	642.296	1049.32	294.734	569.089	1013.06	151.227	640.473	669.188	-117.699	364.436	701.453	-106.037	373.549	711.935	-31.4918	278.908	718.913	-54.074	177.446	688.241	-37.1444	666.804	673.683	392.235	398.915	699.888	424.907	390.308	709.678	351.579	296.203	720.107	385.037	201.177	690.678	376.427
344	3.43	509.756	1242.1	147.791	554.505	1239.74	74.9751	561.939	1235.28	212.912	632.275	1038.16	-19.4338	642.306	1049.31	294.744	569.145	1013.05	151.247	640.501	669.207	-117.698	364.423	701.453	-106.037	373.51	711.929	-31.4634	278.922	718.909	-54.0652	177.418	688.245	-37.1037	666.775	673.677	392.238	398.938	699.865	424.922	390.322	709.705	351.603	296.241	720.096	385.06	200.428	691.22	376.46
345	3.44	509.67	1241.9	147.838	554.446	1239.61	74.9697	561.937	1235.2	212.904	632.261	1038.16	-19.4064	642.297	1049.3	294.746	569.198	1013.01	151.255	640.498	669.204	-117.699	364.425	701.461	-106.047	373.507	711.922	-31.4672	278.945	718.901	-54.0731	177.443	688.223	-37.1286	666.815	673.679	392.234	398.983	699.861	424.932	390.388	709.665	351.598	296.26	720.069	385.067	200.254	691.345	376.463
346	3.45	509.584	1241.72	147.803	554.435	1239.48	74.9631	561.925	1235.15	212.859	632.254	1038.2	-19.3728	642.296	1049.3	294.747	569.207	1012.98	151.245	640.515	669.201	-117.696	364.439	701.453	-106.07	373.513	711.928	-31.4865	278.967	718.897	-54.1019	177.497	688.201	-37.1711	666.811	673.66	392.211	398.991	699.872	424.925	390.423	709.626	351.58	296.286	720.037	385.051	200.666	691.055	376.439
347	3.46	509.538	1241.58	147.797	554.408	1239.36	74.954	561.911	1235.08	212.838	632.253	1038.23	-19.3434	642.312	1049.29	294.749	569.137	1013	151.253	640.508	669.172	-117.691	364.446	701.452	-106.056	373.476	711.939	-31.4726	278.948	718.902	-54.0945	177.497	688.203	-37.1646	666.806	673.67	392.217	398.98	699.865	424.91	390.392	709.649	351.589	296.28	720.045	385.061	201.17	690.665	376.422
348	3.47	509.519	1241.41	147.797	554.366	1239.24	74.9293	561.902	1235	212.827	632.247	1038.22	-19.3638	642.296	1049.29	294.755	569.096	1013.04	151.263	640.497	669.195	-117.688	364.413	701.454	-106.033	373.477	711.931	-31.4595	278.901	718.913	-54.08	177.469	688.2	-37.154	666.797	673.671	392.217	398.946	699.858	424.912	390.354	709.667	351.604	296.279	720.065	385.088	200.838	690.904	376.439
349	3.48	509.445	1241.26	147.776	554.317	1239.09	74.9191	561.902	1234.89	212.81	632.26	1038.16	-19.4221	642.284	1049.3	294.749	569.126	1013.04	151.26	640.492	669.216	-117.69	364.42	701.454	-106.033	373.499	711.934	-31.4623	278.881	718.926	-54.0728	177.413	688.221	-37.1381	666.833	673.68	392.23	398.94	699.851	424.914	390.381	709.652	351.597	296.26	720.078	385.09	201.642	690.35	376.413
350	3.49	509.357	1241.09	147.771	554.315	1238.94	74.8944	561.912	1234.78	212.803	632.261	1038.18	-19.4052	642.304	1049.3	294.736	569.097	1013.07	151.272	640.508	669.213	-117.69	364.429	701.445	-106.034	373.498	711.934	-31.4474	278.875	718.932	-54.0658	177.394	688.248	-37.1317	666.845	673.67	392.222	398.938	699.851	424.92	390.417	709.639	351.585	296.23	720.069	385.073	201.4	690.52	376.423
351	3.5	509.295	1240.9	147.789	554.312	1238.79	74.8698	561.901	1234.69	212.811	632.251	1038.21	-19.3581	642.31	1049.3	294.746	569.053	1013.08	151.294	640.499	669.209	-117.669	364.422	701.438	-106.026	373.466	711.942	-31.4439	278.89	718.938	-54.0701	177.422	688.261	-37.1386	666.847	673.678	392.23	398.944	699.862	424.925	390.265	709.66	351.602	296.198	720.073	385.062	200.881	690.878	376.444
352	3.51	509.258	1240.73	147.812	554.291	1238.63	74.851	561.929	1234.58	212.809	632.276	1038.2	-19.3478	642.317	1049.3	294.763	569.042	1013.08	151.304	640.489	669.206	-117.66	364.414	701.435	-106.023	373.464	711.941	-31.4381	278.895	718.948	-54.0664	177.43	688.246	-37.1309	666.873	673.682	392.231	398.965	699.866	424.926	390.205	709.689	351.64	296.183	720.086	385.077	201.19	690.667	376.436
353	3.52	509.276	1240.56	147.768	554.265	1238.46	74.8212	561.914	1234.49	212.789	632.319	1038.16	-19.4049	642.314	1049.3	294.766	569.067	1013.07	151.296	640.476	669.201	-117.669	364.424	701.441	-106.025	373.467	711.938	-31.4313	278.902	718.937	-54.0681	177.42	688.228	-37.145	666.819	673.667	392.221	398.983	699.878	424.936	390.167	709.738	351.659	296.207	720.089	385.078	200.851	690.919	376.462
354	3.53	509.29	1240.41	147.688	554.213	1238.3	74.7685	561.846	1234.42	212.736	632.286	1038.16	-19.4095	642.308	1049.31	294.769	569.078	1013.06	151.292	640.476	669.181	-117.682	364.436	701.457	-106.029	373.461	711.944	-31.4393	278.904	718.917	-54.0821	177.452	688.204	-37.1631	666.808	673.651	392.229	398.994	699.872	424.924	390.211	709.731	351.618	296.218	720.084	385.064	201.19	690.65	376.422
355	3.54	509.235	1240.25	147.596	554.222	1238.17	74.7164	561.816	1234.4	212.701	632.257	1038.22	-19.3459	642.301	1049.31	294.77	569.06	1013.06	151.298	640.493	669.177	-117.689	364.438	701.453	-106.045	373.486	711.928	-31.4672	278.916	718.894	-54.1103	177.434	688.209	-37.1666	666.805	673.645	392.229	398.995	699.868	424.899	390.224	709.715	351.582	296.216	720.085	385.045	200.409	691.192	376.414
356	3.55	509.232	1240.12	147.565	554.2	1238.05	74.699	561.797	1234.38	212.694	632.229	1038.19	-19.3226	642.307	1049.3	294.788	569.121	1013.02	151.301	640.49	669.188	-117.669	364.444	701.442	-106.03	373.501	711.914	-31.4591	278.908	718.904	-54.093	177.443	688.214	-37.151	666.808	673.661	392.215	398.981	699.86	424.898	390.265	709.698	351.591	296.252	720.077	385.049	200.662	691.023	376.41
357	3.56	509.095	1240.07	147.566	554.139	1237.96	74.6866	561.672	1234.34	212.692	632.252	1038.13	-19.3099	642.314	1049.29	294.823	569.111	1013.05	151.343	640.482	669.199	-117.674	364.439	701.437	-106.002	373.49	711.903	-31.4345	278.895	718.915	-54.05	177.441	688.217	-37.1427	666.816	673.656	392.209	398.98	699.85	424.92	390.376	709.642	351.597	296.239	720.082	385.072	201.159	690.676	376.424
358	3.57	508.937	1240.04	147.53	554.042	1237.89	74.6911	561.61	1234.33	212.655	632.253	1038.19	-19.2585	642.313	1049.3	294.843	569.094	1013.07	151.379	640.462	669.197	-117.661	364.417	701.43	-105.986	373.496	711.903	-31.4434	278.913	718.922	-54.0466	177.397	688.231	-37.1045	666.854	673.664	392.231	398.97	699.831	424.919	390.356	709.633	351.607	296.213	720.085	385.092	200.839	690.904	376.456
359	3.58	508.858	1240.01	147.501	553.98	1237.82	74.6692	561.505	1234.31	212.642	632.294	1038.23	-19.2482	642.333	1049.3	294.844	569.134	1013.07	151.384	640.438	669.205	-117.623	364.409	701.44	-106.002	373.498	711.902	-31.4478	278.916	718.93	-54.0611	177.4	688.227	-37.1076	666.863	673.655	392.25	398.911	699.833	424.918	390.337	709.635	351.61	296.214	720.077	385.087	201.202	690.652	376.437
360	3.59	508.806	1239.98	147.461	553.933	1237.78	74.6405	561.441	1234.33	212.609	632.345	1038.25	-19.2287	642.354	1049.3	294.847	569.152	1013.09	151.392	640.461	669.215	-117.619	364.413	701.466	-106.012	373.505	711.911	-31.4507	278.934	718.931	-54.0627	177.413	688.234	-37.1322	666.82	673.629	392.263	398.926	699.823	424.92	390.313	709.651	351.639	296.246	720.067	385.096	200.461	691.206	376.476
361	3.6	508.705	1239.98	147.448	553.863	1237.74	74.6322	561.359	1234.29	212.615	632.372	1038.24	-19.2329	642.364	1049.3	294.855	569.13	1013.12	151.405	640.484	669.226	-117.622	364.435	701.487	-105.99	373.527	711.934	-31.4294	278.932	718.93	-54.0519	177.466	688.224	-37.1416	666.865	673.656	392.288	398.965	699.847	424.929	390.272	709.681	351.655	296.269	720.065	385.093	200.702	691.043	376.482
362	3.61	508.622	1239.98	147.417	553.782	1237.74	74.6276	561.236	1234.31	212.596	632.352	1038.22	-19.2768	642.361	1049.29	294.85	569.104	1013.11	151.401	640.53	669.264	-117.626	364.45	701.488	-106.002	373.52	711.944	-31.4215	278.896	718.929	-54.0438	177.466	688.222	-37.1368	666.87	673.65	392.3	398.997	699.849	424.925	390.232	709.713	351.66	296.239	720.09	385.076	201.161	690.692	376.442
363	3.62	508.596	1239.95	147.363	553.702	1237.73	74.5824	561.075	1234.36	212.544	632.341	1038.24	-19.3046	642.349	1049.29	294.838	569.081	1013.09	151.367	640.542	669.256	-117.617	364.432	701.472	-106.018	373.474	711.934	-31.4362	278.896	718.919	-54.0603	177.414	688.229	-37.128	666.828	673.631	392.301	398.991	699.838	424.922	390.125	709.75	351.652	296.229	720.1	385.044	200.382	691.227	376.45
364	3.63	508.561	1239.92	147.324	553.675	1237.71	74.5553	561.002	1234.38	212.523	632.366	1038.18	-19.3438	642.356	1049.28	294.831	569.09	1013.06	151.337	640.535	669.26	-117.622	364.434	701.455	-106.035	373.433	711.921	-31.4292	278.916	718.899	-54.0794	177.422	688.239	-37.1419	666.827	673.629	392.311	398.978	699.837	424.909	390.135	709.724	351.63	296.236	720.081	385.048	200.204	691.352	376.453
365	3.64	508.504	1239.91	147.312	553.618	1237.69	74.5586	560.954	1234.38	212.525	632.389	1038.17	-19.3396	642.362	1049.28	294.827	569.116	1013.02	151.332	640.532	669.241	-117.65	364.452	701.442	-106.033	373.427	711.913	-31.427	278.916	718.896	-54.0863	177.462	688.235	-37.1606	666.825	673.64	392.312	398.972	699.844	424.908	390.256	709.677	351.614	296.238	720.067	385.049	200.162	691.365	376.46
366	3.65	508.472	1239.89	147.295	553.584	1237.7	74.551	560.926	1234.35	212.534	632.355	1038.2	-19.3105	642.353	1049.28	294.809	569.141	1012.98	151.322	640.541	669.206	-117.661	364.457	701.437	-106.035	373.453	711.905	-31.4499	278.915	718.892	-54.1027	177.517	688.198	-37.1826	666.837	673.649	392.292	398.963	699.834	424.918	390.32	709.646	351.599	296.224	720.08	385.04	200.61	691.053	376.432
367	3.66	508.405	1239.9	147.304	553.572	1237.73	74.5373	560.896	1234.32	212.547	632.336	1038.18	-19.3128	642.333	1049.29	294.799	569.126	1012.99	151.334	640.542	669.206	-117.66	364.442	701.438	-106.032	373.474	711.908	-31.4437	278.912	718.897	-54.1082	177.496	688.204	-37.1835	666.855	673.669	392.295	398.946	699.836	424.916	390.26	709.683	351.608	296.227	720.087	385.034	201.14	690.686	376.405
368	3.67	508.393	1239.94	147.324	553.514	1237.77	74.5709	560.835	1234.34	212.556	632.342	1038.12	-19.3457	642.326	1049.3	294.803	569.073	1013.04	151.36	640.507	669.165	-117.64	364.439	701.45	-106.006	373.479	711.917	-31.4442	278.919	718.913	-54.0759	177.487	688.221	-37.1563	666.869	673.692	392.301	398.956	699.846	424.93	390.235	709.701	351.65	296.242	720.074	385.06	200.839	690.925	376.43
369	3.68	508.385	1239.98	147.343	553.461	1237.81	74.602	560.83	1234.35	212.555	632.329	1038.09	-19.3645	642.299	1049.31	294.805	569.086	1013.03	151.345	640.507	669.145	-117.63	364.442	701.46	-106.009	373.482	711.932	-31.4486	278.926	718.928	-54.0568	177.463	688.249	-37.1236	666.845	673.68	392.284	398.945	699.858	424.947	390.308	709.676	351.641	296.249	720.088	385.069	201.634	690.376	376.42
370	3.69	508.353	1240.03	147.319	553.445	1237.85	74.5861	560.769	1234.36	212.573	632.342	1038.12	-19.384	642.313	1049.32	294.774	569.078	1013.02	151.308	640.52	669.125	-117.654	364.453	701.457	-106.027	373.491	711.935	-31.4819	278.938	718.933	-54.0763	177.45	688.249	-37.1484	666.806	673.664	392.251	398.944	699.866	424.937	390.337	709.648	351.61	296.241	720.097	385.055	201.835	690.232	376.413
371	3.7	508.31	1240.06	147.308	553.418	1237.89	74.5795	560.704	1234.34	212.545	632.342	1038.13	-19.3928	642.301	1049.32	294.748	569.07	1013.01	151.267	640.526	669.105	-117.667	364.473	701.449	-106.026	373.502	711.917	-31.4828	278.916	718.935	-54.0706	177.464	688.243	-37.1573	666.788	673.668	392.242	398.973	699.864	424.921	390.328	709.661	351.639	296.236	720.088	385.051	201.468	690.494	376.424
372	3.71	508.378	1240.02	147.352	553.412	1237.9	74.6074	560.75	1234.31	212.577	632.303	1038.11	-19.418	642.28	1049.31	294.743	569.067	1012.98	151.274	640.522	669.107	-117.657	364.47	701.428	-106.013	373.505	711.905	-31.46	278.925	718.932	-54.0694	177.439	688.229	-37.1368	666.832	673.692	392.243	398.994	699.854	424.92	390.302	709.692	351.656	296.236	720.066	385.067	200.515	691.169	376.477
373	3.72	508.397	1240	147.37	553.412	1237.9	74.6102	560.785	1234.31	212.594	632.253	1038.15	-19.3956	642.281	1049.29	294.72	569.101	1012.94	151.245	640.528	669.111	-117.631	364.471	701.417	-106.028	373.512	711.895	-31.463	278.953	718.916	-54.0913	177.442	688.216	-37.1479	666.854	673.7	392.248	399.021	699.839	424.928	390.325	709.694	351.631	296.253	720.067	385.07	200.285	691.318	376.474
374	3.73	508.397	1240.01	147.353	553.412	1237.91	74.5877	560.738	1234.31	212.581	632.227	1038.17	-19.3944	642.274	1049.29	294.689	569.115	1012.92	151.196	640.538	669.111	-117.622	364.443	701.406	-106.046	373.522	711.899	-31.4839	278.934	718.902	-54.1125	177.423	688.209	-37.172	666.847	673.703	392.24	399.011	699.843	424.908	390.319	709.687	351.597	296.252	720.075	385.046	200.197	691.354	376.436
375	3.74	508.354	1240.04	147.365	553.349	1237.94	74.5929	560.748	1234.32	212.578	632.198	1038.16	-19.4306	642.241	1049.31	294.673	569.066	1012.92	151.182	640.521	669.102	-117.642	364.419	701.434	-106.053	373.486	711.918	-31.4889	278.896	718.909	-54.113	177.387	688.206	-37.1844	666.805	673.69	392.221	398.962	699.856	424.887	390.256	709.685	351.581	296.19	720.085	385.042	200.145	691.379	376.431
376	3.75	508.344	1240.06	147.409	553.264	1237.98	74.6395	560.79	1234.33	212.6	632.235	1038.11	-19.4852	642.227	1049.32	294.684	569.035	1012.95	151.192	640.518	669.12	-117.658	364.421	701.457	-106.05	373.467	711.93	-31.4548	278.891	718.927	-54.0827	177.383	688.225	-37.1689	666.818	673.702	392.212	398.956	699.875	424.904	390.29	709.68	351.603	296.205	720.088	385.068	200.135	691.408	376.456
377	3.76	508.335	1240.1	147.46	553.225	1238.01	74.6625	560.802	1234.35	212.614	632.245	1038.1	-19.5055	642.229	1049.34	294.692	569.01	1012.98	151.206	640.497	669.122	-117.648	364.443	701.469	-106.026	373.472	711.938	-31.4423	278.894	718.954	-54.0661	177.423	688.246	-37.1481	666.849	673.721	392.221	398.956	699.888	424.922	390.301	709.701	351.607	296.225	720.108	385.072	200.153	691.427	376.475
378	3.77	508.347	1240.12	147.445	553.229	1238.01	74.6519	560.774	1234.37	212.602	632.183	1038.11	-19.5177	642.22	1049.34	294.678	568.99	1012.98	151.188	640.509	669.117	-117.661	364.413	701.469	-106.029	373.468	711.949	-31.4746	278.906	718.956	-54.0856	177.437	688.26	-37.1525	666.858	673.727	392.247	398.967	699.883	424.908	390.316	709.674	351.577	296.22	720.111	385.052	200.116	691.432	376.458
379	3.78	508.322	1240.1	147.395	553.229	1237.99	74.6142	560.755	1234.37	212.582	632.14	1038.1	-19.525	642.208	1049.33	294.656	568.979	1012.97	151.175	640.489	669.115	-117.684	364.414	701.453	-106.045	373.454	711.953	-31.4875	278.918	718.949	-54.1087	177.42	688.255	-37.158	666.842	673.728	392.238	398.964	699.868	424.912	390.272	709.683	351.555	296.212	720.094	385.038	200.102	691.432	376.442
380	3.79	508.37	1240.09	147.397	553.225	1237.97	74.5956	560.739	1234.4	212.578	632.163	1038.09	-19.518	642.216	1049.33	294.671	568.993	1012.95	151.169	640.493	669.119	-117.695	364.423	701.442	-106.042	373.49	711.947	-31.4842	278.942	718.945	-54.1009	177.446	688.224	-37.1641	666.817	673.74	392.224	398.958	699.845	424.915	390.297	709.686	351.596	296.241	720.077	385.049	200.575	691.1	376.446
381	3.8	508.322	1240.11	147.417	553.19	1237.95	74.6145	560.701	1234.39	212.56	632.144	1038.09	-19.5017	642.201	1049.33	294.695	568.97	1012.94	151.189	640.514	669.111	-117.703	364.428	701.435	-106.04	373.488	711.926	-31.477	278.919	718.94	-54.0807	177.453	688.202	-37.1456	666.835	673.73	392.246	398.943	699.838	424.916	390.312	709.672	351.619	296.241	720.062	385.068	201.57	690.388	376.435
382	3.81	508.279	1240.08	147.408	553.147	1237.93	74.6075	560.695	1234.36	212.559	632.113	1038.1	-19.4903	642.181	1049.31	294.695	568.953	1012.93	151.183	640.47	669.103	-117.713	364.419	701.411	-106.036	373.464	711.911	-31.4593	278.895	718.928	-54.0822	177.44	688.206	-37.1302	666.859	673.706	392.245	398.921	699.833	424.915	390.35	709.638	351.588	296.262	720.032	385.077	201.818	690.198	376.415
383	3.82	508.287	1240.02	147.369	553.157	1237.91	74.5619	560.653	1234.38	212.551	632.075	1038.16	-19.4466	642.177	1049.31	294.677	569.034	1012.88	151.152	640.459	669.129	-117.735	364.416	701.402	-106.055	373.491	711.914	-31.4844	278.915	718.901	-54.1052	177.45	688.205	-37.1695	666.829	673.669	392.229	398.899	699.831	424.894	390.45	709.58	351.556	296.281	720.009	385.075	201.896	690.138	376.392
384	3.83	508.308	1240.01	147.338	553.17	1237.89	74.5271	560.623	1234.41	212.538	632.113	1038.19	-19.4342	642.198	1049.3	294.676	569.137	1012.83	151.146	640.496	669.14	-117.757	364.462	701.393	-106.071	373.512	711.909	-31.4858	278.962	718.888	-54.1222	177.441	688.185	-37.1624	666.851	673.7	392.221	398.962	699.845	424.903	390.488	709.582	351.575	296.267	720.007	385.071	201.949	690.113	376.39
385	3.84	508.249	1240.05	147.32	553.138	1237.89	74.5164	560.529	1234.41	212.516	632.123	1038.16	-19.4354	642.21	1049.31	294.685	569.109	1012.87	151.154	640.525	669.154	-117.757	364.462	701.408	-106.071	373.505	711.921	-31.4658	278.969	718.898	-54.1103	177.448	688.187	-37.1529	666.853	673.713	392.234	398.987	699.872	424.918	390.379	709.664	351.605	296.226	720.05	385.058	201.94	690.131	376.402
386	3.85	508.113	1240.09	147.291	553.078	1237.91	74.5075	560.449	1234.43	212.47	632.153	1038.12	-19.5027	642.203	1049.33	294.69	569.017	1012.94	151.168	640.498	669.178	-117.751	364.435	701.43	-106.068	373.497	711.936	-31.477	278.928	718.933	-54.0954	177.473	688.213	-37.1758	666.806	673.712	392.229	398.947	699.904	424.912	390.179	709.75	351.629	296.226	720.091	385.053	201.473	690.472	376.415
387	3.86	508.095	1240.09	147.25	553.033	1237.92	74.4834	560.423	1234.45	212.404	632.158	1038.13	-19.5292	642.208	1049.34	294.679	568.974	1013	151.16	640.494	669.187	-117.742	364.435	701.441	-106.088	373.509	711.951	-31.5056	278.92	718.957	-54.0997	177.519	688.237	-37.1944	666.829	673.716	392.236	398.943	699.905	424.89	390.165	709.749	351.598	296.213	720.112	385.052	200.488	691.195	376.447
388	3.87	508.031	1240.08	147.217	553.02	1237.92	74.4693	560.388	1234.44	212.404	632.171	1038.13	-19.5313	642.196	1049.36	294.667	568.952	1013.03	151.17	640.504	669.169	-117.736	364.394	701.453	-106.072	373.525	711.963	-31.5164	278.917	718.962	-54.0949	177.468	688.258	-37.1695	666.836	673.712	392.229	398.971	699.902	424.894	390.221	709.708	351.571	296.219	720.121	385.044	200.649	691.08	376.443
389	3.88	507.921	1240.09	147.215	553.004	1237.9	74.4695	560.327	1234.44	212.423	632.17	1038.08	-19.5323	642.183	1049.37	294.681	568.919	1013.03	151.2	640.495	669.12	-117.724	364.377	701.451	-106.04	373.491	711.976	-31.5086	278.883	718.961	-54.0786	177.419	688.258	-37.1389	666.844	673.733	392.238	398.948	699.89	424.899	390.23	709.703	351.59	296.233	720.125	385.054	201.531	690.413	376.416
390	3.89	507.921	1240.05	147.194	553	1237.86	74.4744	560.253	1234.42	212.379	632.14	1038.08	-19.4738	642.201	1049.36	294.692	568.926	1012.99	151.206	640.488	669.084	-117.7	364.396	701.427	-106.043	373.469	711.946	-31.4795	278.869	718.951	-54.08	177.419	688.226	-37.1329	666.902	673.771	392.254	398.949	699.871	424.906	390.165	709.717	351.617	296.24	720.11	385.067	201.347	690.53	376.421
391	3.9	508.051	1239.94	147.157	553.023	1237.8	74.4553	560.218	1234.38	212.354	632.169	1038.13	-19.4205	642.213	1049.34	294.684	569.081	1012.88	151.193	640.51	669.063	-117.702	364.434	701.409	-106.063	373.47	711.911	-31.465	278.906	718.914	-54.0954	177.425	688.216	-37.1544	666.876	673.768	392.257	398.975	699.855	424.922	390.233	709.678	351.626	296.265	720.056	385.08	200.912	690.853	376.439
392	3.91	508.082	1239.87	147.138	553.025	1237.75	74.4292	560.277	1234.37	212.339	632.168	1038.13	-19.421	642.209	1049.33	294.665	569.169	1012.83	151.15	640.52	669.045	-117.69	364.459	701.392	-106.068	373.494	711.892	-31.4877	278.937	718.89	-54.1054	177.434	688.204	-37.1845	666.858	673.757	392.252	399.009	699.846	424.932	390.413	709.631	351.6	296.248	720.027	385.067	201.235	690.609	376.42
393	3.92	508.027	1239.87	147.113	553.03	1237.75	74.397	560.304	1234.36	212.305	632.16	1038.11	-19.3977	642.198	1049.33	294.673	569.175	1012.83	151.105	640.504	669.033	-117.651	364.442	701.405	-106.055	373.498	711.896	-31.4918	278.918	718.891	-54.1039	177.495	688.182	-37.2162	666.859	673.757	392.275	399.019	699.845	424.941	390.477	709.61	351.587	296.262	720.036	385.06	200.446	691.159	376.444
394	3.93	507.961	1239.91	147.109	553.018	1237.76	74.3905	560.225	1234.37	212.332	632.156	1038.1	-19.3718	642.2	1049.35	294.688	569.119	1012.89	151.131	640.514	669.029	-117.599	364.413	701.425	-106.029	373.503	711.917	-31.4651	278.902	718.921	-54.0938	177.482	688.216	-37.1802	666.874	673.773	392.294	399.026	699.853	424.922	390.375	709.659	351.626	296.249	720.043	385.07	200.676	691.016	376.452
395	3.94	507.865	1239.96	147.13	552.973	1237.77	74.4089	560.24	1234.37	212.325	632.197	1038.1	-19.4012	642.193	1049.37	294.692	569.019	1012.97	151.182	640.49	669.018	-117.578	364.416	701.443	-106.024	373.502	711.944	-31.4622	278.895	718.961	-54.0773	177.488	688.24	-37.1617	666.864	673.781	392.304	399.014	699.872	424.925	390.356	709.677	351.631	296.239	720.063	385.084	201.172	690.705	376.448
396	3.95	507.796	1239.97	147.13	552.912	1237.79	74.4228	560.22	1234.36	212.271	632.217	1038.09	-19.4432	642.168	1049.4	294.691	568.963	1013.02	151.199	640.445	669.005	-117.563	364.424	701.472	-106.023	373.485	711.956	-31.4478	278.882	718.977	-54.0716	177.467	688.258	-37.1576	666.842	673.787	392.312	398.964	699.872	424.919	390.394	709.654	351.603	296.238	720.092	385.071	200.418	691.256	376.488
397	3.96	507.751	1239.97	147.087	552.894	1237.79	74.4154	560.07	1234.38	212.235	632.193	1038.1	-19.4446	642.169	1049.4	294.691	569	1012.99	151.175	640.433	668.988	-117.511	364.438	701.467	-106.04	373.498	711.948	-31.45	278.891	718.966	-54.0836	177.469	688.267	-37.1752	666.872	673.807	392.349	398.949	699.874	424.929	390.316	709.647	351.615	296.226	720.109	385.054	200.219	691.386	376.481
398	3.97	507.829	1239.91	147.058	552.945	1237.77	74.3841	560.067	1234.4	212.249	632.241	1038.04	-19.48	642.171	1049.38	294.686	569.044	1012.94	151.163	640.479	668.988	-117.492	364.479	701.439	-106.035	373.496	711.924	-31.4438	278.931	718.947	-54.1078	177.474	688.245	-37.1658	666.875	673.814	392.343	398.943	699.872	424.917	390.275	709.658	351.604	296.22	720.118	385.04	200.614	691.089	376.44
399	3.98	507.9	1239.88	147.039	552.975	1237.75	74.352	560.112	1234.41	212.261	632.27	1037.99	-19.4867	642.166	1049.37	294.677	569.075	1012.89	151.167	640.502	668.983	-117.51	364.475	701.442	-106.035	373.501	711.898	-31.4424	278.951	718.926	-54.1205	177.437	688.232	-37.163	666.838	673.81	392.329	398.916	699.878	424.91	390.313	709.67	351.601	296.19	720.112	385.044	201.156	690.677	376.416
400	3.99	507.857	1239.89	147.02	552.95	1237.73	74.329	560.08	1234.4	212.249	632.211	1038.02	-19.4578	642.137	1049.36	294.68	569.083	1012.87	151.162	640.516	668.976	-117.505	364.445	701.43	-106.042	373.489	711.897	-31.4566	278.927	718.928	-54.1197	177.416	688.218	-37.1735	666.846	673.824	392.346	398.922	699.891	424.925	390.382	709.678	351.61	296.176	720.093	385.055	200.437	691.185	376.438
401	4	507.814	1239.89	146.979	552.947	1237.73	74.3032	559.943	1234.42	212.173	632.197	1038.06	-19.4307	642.127	1049.37	294.681	569.074	1012.88	151.139	640.511	668.967	-117.5	364.425	701.434	-106.049	373.467	711.904	-31.4653	278.93	718.914	-54.1339	177.413	688.204	-37.1754	666.88	673.823	392.381	398.939	699.895	424.934	390.369	709.706	351.615	296.183	720.087	385.058	200.683	691.008	376.411
402	4.01	507.813	1239.9	146.962	552.947	1237.73	74.2931	559.9	1234.46	212.163	632.261	1038	-19.4799	642.127	1049.37	294.689	569.072	1012.9	151.14	640.543	668.967	-117.521	364.459	701.444	-106.045	373.497	711.911	-31.4751	278.958	718.921	-54.1335	177.454	688.213	-37.1915	666.913	673.812	392.39	398.994	699.879	424.914	390.306	709.728	351.602	296.247	720.06	385.059	201.165	690.665	376.402
403	4.02	507.784	1239.93	146.959	552.94	1237.74	74.3163	559.98	1234.46	212.147	632.266	1038.01	-19.4764	642.111	1049.36	294.7	569.028	1012.93	151.16	640.532	668.966	-117.54	364.449	701.451	-106.049	373.502	711.92	-31.4749	278.95	718.939	-54.1235	177.44	688.219	-37.1806	666.932	673.813	392.37	399.012	699.86	424.905	390.234	709.728	351.613	296.25	720.066	385.06	200.414	691.21	376.456
404	4.03	507.699	1239.98	146.984	552.89	1237.73	74.3496	559.947	1234.45	212.126	632.188	1038	-19.4642	642.091	1049.37	294.726	568.958	1012.99	151.182	640.487	668.954	-117.545	364.418	701.458	-106.031	373.455	711.928	-31.4636	278.93	718.954	-54.0933	177.441	688.244	-37.1594	666.898	673.788	392.362	398.984	699.836	424.917	390.272	709.683	351.631	296.236	720.085	385.069	200.652	691.049	376.46
405	4.04	507.696	1239.96	146.985	552.866	1237.71	74.357	559.822	1234.39	212.124	632.153	1038.01	-19.4371	642.085	1049.37	294.74	568.975	1012.97	151.19	640.522	668.99	-117.563	364.419	701.447	-106.011	373.475	711.931	-31.4509	278.906	718.952	-54.0783	177.459	688.216	-37.1855	666.869	673.784	392.37	398.958	699.824	424.93	390.38	709.629	351.624	296.259	720.085	385.077	201.599	690.374	376.429
406	4.05	507.726	1239.9	146.976	552.885	1237.68	74.3539	559.841	1234.35	212.114	632.146	1038.07	-19.3894	642.084	1049.35	294.741	569.028	1012.91	151.195	640.55	669.026	-117.573	364.451	701.414	-105.992	373.522	711.908	-31.4543	278.929	718.931	-54.0733	177.461	688.184	-37.1663	666.856	673.767	392.36	398.966	699.822	424.925	390.45	709.599	351.615	296.289	720.066	385.086	201.403	690.502	376.443
407	4.06	507.749	1239.87	146.944	552.852	1237.64	74.3593	559.839	1234.32	212.094	632.087	1038.06	-19.3798	642.077	1049.34	294.729	569.039	1012.88	151.198	640.524	669.048	-117.588	364.471	701.401	-106.024	373.512	711.897	-31.461	278.933	718.917	-54.083	177.469	688.193	-37.1641	666.845	673.761	392.345	398.978	699.827	424.916	390.453	709.599	351.629	296.277	720.068	385.083	200.491	691.149	376.482
408	4.07	507.737	1239.86	146.905	552.797	1237.63	74.3496	559.69	1234.32	212.081	632.053	1038.04	-19.3955	642.053	1049.34	294.721	569.04	1012.85	151.177	640.513	669.072	-117.616	364.43	701.405	-106.049	373.488	711.903	-31.4685	278.901	718.924	-54.1027	177.453	688.199	-37.1819	666.864	673.787	392.337	398.931	699.827	424.907	390.383	709.628	351.627	296.219	720.065	385.059	200.23	691.325	376.457
409	4.08	507.719	1239.88	146.871	552.783	1237.63	74.3308	559.543	1234.35	212.062	631.993	1038.11	-19.3554	642.041	1049.34	294.722	569.039	1012.83	151.141	640.523	669.092	-117.622	364.439	701.409	-106.059	373.479	711.922	-31.4797	278.923	718.907	-54.1307	177.478	688.192	-37.2013	666.86	673.792	392.335	398.928	699.852	424.931	390.351	709.657	351.621	296.174	720.087	385.059	200.124	691.385	376.435
410	4.09	507.676	1239.92	146.837	552.805	1237.63	74.3286	559.481	1234.38	212.045	632.026	1038.13	-19.3858	642.045	1049.35	294.715	569.026	1012.84	151.148	640.517	669.099	-117.637	364.449	701.419	-106.054	373.462	711.939	-31.484	278.936	718.916	-54.1437	177.484	688.213	-37.1933	666.868	673.805	392.342	398.961	699.886	424.932	390.321	709.714	351.619	296.213	720.097	385.055	200.132	691.402	376.438
411	4.1	507.646	1239.92	146.842	552.794	1237.64	74.3257	559.498	1234.4	212.02	632.025	1038.12	-19.4191	642.049	1049.35	294.704	569.007	1012.86	151.153	640.497	669.11	-117.678	364.432	701.461	-106.047	373.485	711.947	-31.4943	278.958	718.935	-54.1565	177.487	688.227	-37.1895	666.871	673.803	392.327	398.994	699.905	424.903	390.351	709.713	351.595	296.246	720.101	385.033	200.155	691.404	376.438
412	4.11	507.585	1239.93	146.842	552.762	1237.65	74.3247	559.486	1234.39	211.991	631.984	1038.14	-19.3873	642.043	1049.35	294.706	568.963	1012.9	151.146	640.486	669.106	-117.69	364.434	701.468	-106.068	373.529	711.95	-31.5116	278.934	718.955	-54.1411	177.466	688.254	-37.2023	666.88	673.783	392.331	398.988	699.877	424.897	390.254	709.725	351.59	296.244	720.092	385.034	200.171	691.408	376.447
413	4.12	507.506	1239.95	146.868	552.738	1237.66	74.3371	559.49	1234.39	212.022	631.978	1038.09	-19.4036	642.027	1049.35	294.729	568.939	1012.91	151.162	640.505	669.096	-117.697	364.435	701.458	-106.048	373.508	711.95	-31.4945	278.891	718.967	-54.1108	177.441	688.263	-37.1889	666.878	673.761	392.337	398.978	699.859	424.92	390.226	709.696	351.591	296.236	720.093	385.061	200.582	691.101	376.441
414	4.13	507.566	1239.93	146.882	552.727	1237.66	74.3629	559.598	1234.37	212.06	631.996	1038.1	-19.3934	642.034	1049.35	294.737	568.938	1012.91	151.204	640.547	669.112	-117.701	364.427	701.453	-106.036	373.498	711.949	-31.4813	278.892	718.964	-54.0871	177.417	688.262	-37.1477	666.881	673.767	392.335	398.974	699.853	424.92	390.309	709.649	351.589	296.228	720.08	385.101	201.583	690.396	376.416
415	4.14	507.62	1239.88	146.924	552.742	1237.65	74.3695	559.717	1234.41	212.087	631.98	1038.13	-19.3668	642.039	1049.35	294.734	568.958	1012.88	151.203	640.544	669.116	-117.719	364.415	701.426	-106.033	373.52	711.934	-31.4796	278.899	718.948	-54.0735	177.422	688.244	-37.1386	666.884	673.768	392.322	398.973	699.838	424.925	390.38	709.625	351.616	296.263	720.057	385.104	201.842	690.223	376.411
416	4.15	507.673	1239.83	146.934	552.755	1237.63	74.3605	559.737	1234.39	212.107	631.97	1038.13	-19.3685	642.006	1049.33	294.736	568.968	1012.83	151.182	640.508	669.121	-117.727	364.414	701.405	-106.033	373.523	711.908	-31.4826	278.924	718.918	-54.0838	177.394	688.221	-37.1554	666.845	673.758	392.311	398.94	699.831	424.943	390.367	709.624	351.615	296.257	720.039	385.093	201.422	690.462	376.424
417	4.16	507.684	1239.8	146.921	552.758	1237.61	74.3524	559.752	1234.38	212.129	631.951	1038.14	-19.3371	641.965	1049.32	294.736	568.952	1012.79	151.164	640.475	669.125	-117.717	364.433	701.403	-106.054	373.467	711.903	-31.474	278.92	718.91	-54.0934	177.379	688.195	-37.1403	666.852	673.776	392.322	398.975	699.843	424.954	390.437	709.622	351.619	296.235	720.049	385.086	200.887	690.815	376.435
418	4.17	507.711	1239.76	146.953	552.791	1237.6	74.3425	559.796	1234.37	212.138	631.946	1038.16	-19.3259	641.969	1049.31	294.723	569.014	1012.76	151.157	640.528	669.155	-117.746	364.468	701.399	-106.053	373.466	711.903	-31.484	278.933	718.898	-54.0992	177.421	688.183	-37.1399	666.875	673.786	392.329	398.956	699.848	424.933	390.368	709.647	351.641	296.225	720.057	385.053	201.19	690.606	376.408
419	4.18	507.704	1239.74	146.943	552.796	1237.61	74.3513	559.732	1234.37	212.134	631.964	1038.14	-19.3519	641.985	1049.32	294.712	569.037	1012.76	151.142	640.507	669.147	-117.758	364.472	701.406	-106.059	373.495	711.908	-31.4962	278.927	718.905	-54.1158	177.443	688.203	-37.1605	666.882	673.798	392.333	398.939	699.863	424.911	390.249	709.678	351.622	296.233	720.065	385.05	200.422	691.18	376.429
420	4.19	507.602	1239.8	146.948	552.732	1237.62	74.3714	559.652	1234.4	212.132	631.914	1038.11	-19.3967	641.953	1049.31	294.712	568.975	1012.81	151.151	640.487	669.141	-117.753	364.411	701.436	-106.077	373.501	711.921	-31.5028	278.889	718.925	-54.1139	177.422	688.224	-37.1684	666.842	673.781	392.34	398.956	699.863	424.917	390.251	709.692	351.609	296.217	720.089	385.038	200.197	691.342	376.442
421	4.2	507.542	1239.83	146.965	552.658	1237.64	74.4086	559.613	1234.39	212.142	631.922	1038.14	-19.3897	641.925	1049.32	294.729	568.956	1012.82	151.17	640.52	669.147	-117.739	364.379	701.446	-106.071	373.522	711.942	-31.5003	278.892	718.949	-54.1033	177.42	688.232	-37.1706	666.833	673.768	392.348	398.945	699.869	424.91	390.318	709.668	351.617	296.19	720.104	385.029	200.129	691.397	376.446
422	4.21	507.571	1239.83	147.006	552.657	1237.65	74.4417	559.66	1234.36	212.164	631.978	1038.11	-19.418	641.955	1049.33	294.732	568.93	1012.85	151.188	640.561	669.167	-117.746	364.408	701.443	-106.048	373.535	711.942	-31.488	278.9	718.96	-54.0906	177.477	688.239	-37.1902	666.845	673.754	392.365	398.952	699.862	424.905	390.283	709.68	351.63	296.217	720.089	385.044	200.145	691.411	376.446
423	4.22	507.563	1239.84	147.05	552.66	1237.64	74.4563	559.707	1234.34	212.174	631.972	1038.12	-19.4071	641.965	1049.33	294.739	568.872	1012.86	151.192	640.544	669.155	-117.768	364.44	701.45	-106.046	373.532	711.943	-31.4962	278.897	718.961	-54.0766	177.48	688.221	-37.1919	666.878	673.772	392.394	398.969	699.854	424.897	390.31	709.665	351.628	296.244	720.082	385.054	200.583	691.094	376.446
424	4.23	507.514	1239.83	147.07	552.603	1237.64	74.4849	559.671	1234.34	212.197	631.924	1038.09	-19.3985	641.932	1049.33	294.737	568.889	1012.82	151.175	640.508	669.152	-117.76	364.435	701.451	-106.068	373.532	711.942	-31.5111	278.904	718.944	-54.1013	177.437	688.214	-37.1895	666.897	673.791	392.418	398.96	699.85	424.914	390.268	709.672	351.629	296.235	720.066	385.078	201.114	690.691	376.417
425	4.24	507.51	1239.8	147.06	552.572	1237.64	74.4869	559.617	1234.33	212.213	631.888	1038.1	-19.3844	641.918	1049.32	294.744	568.88	1012.76	151.183	640.49	669.144	-117.755	364.417	701.434	-106.091	373.526	711.943	-31.509	278.927	718.925	-54.1325	177.44	688.235	-37.1943	666.904	673.783	392.43	398.942	699.842	424.926	390.207	709.691	351.621	296.225	720.074	385.081	200.832	690.894	376.413
426	4.25	507.532	1239.78	147.067	552.582	1237.63	74.4787	559.572	1234.32	212.238	631.855	1038.12	-19.3438	641.901	1049.31	294.746	568.883	1012.73	151.172	640.497	669.128	-117.767	364.43	701.43	-106.097	373.542	711.942	-31.5064	278.931	718.913	-54.132	177.466	688.231	-37.1933	666.93	673.774	392.437	398.965	699.848	424.916	390.193	709.71	351.632	296.238	720.068	385.064	201.22	690.63	376.396
427	4.26	507.509	1239.76	147.094	552.545	1237.63	74.4967	559.586	1234.33	212.247	631.825	1038.06	-19.3674	641.861	1049.3	294.774	568.903	1012.72	151.188	640.535	669.155	-117.775	364.429	701.43	-106.086	373.495	711.939	-31.4895	278.921	718.914	-54.1207	177.467	688.224	-37.1802	666.939	673.783	392.435	398.988	699.855	424.914	390.198	709.714	351.638	296.23	720.07	385.058	200.398	691.187	376.436
428	4.27	507.464	1239.77	147.141	552.476	1237.62	74.5321	559.532	1234.34	212.245	631.75	1038.08	-19.3111	641.813	1049.31	294.813	568.889	1012.71	151.223	640.534	669.179	-117.796	364.41	701.417	-106.069	373.464	711.93	-31.4875	278.916	718.912	-54.1203	177.474	688.222	-37.1847	666.89	673.773	392.434	398.957	699.85	424.929	390.292	709.689	351.63	296.203	720.074	385.066	200.619	691.018	376.439
429	4.28	507.509	1239.77	147.161	552.443	1237.61	74.5582	559.469	1234.33	212.273	631.688	1038.12	-19.2444	641.758	1049.3	294.846	568.899	1012.66	151.261	640.519	669.217	-117.818	364.389	701.398	-106.062	373.484	711.918	-31.5052	278.925	718.912	-54.1232	177.473	688.196	-37.1634	666.864	673.79	392.433	398.916	699.864	424.955	390.423	709.658	351.639	296.204	720.072	385.079	201.112	690.662	376.424
430	4.29	507.49	1239.77	147.204	552.391	1237.58	74.6034	559.482	1234.34	212.325	631.653	1038.16	-19.2235	641.71	1049.31	294.884	568.905	1012.64	151.305	640.508	669.253	-117.841	364.421	701.379	-106.058	373.515	711.917	-31.4963	278.922	718.913	-54.1049	177.447	688.181	-37.1365	666.862	673.813	392.445	398.891	699.851	424.958	390.396	709.64	351.667	296.209	720.08	385.077	200.387	691.196	376.447
431	4.3	507.516	1239.75	147.209	552.359	1237.57	74.6247	559.41	1234.35	212.307	631.641	1038.17	-19.1865	641.698	1049.31	294.915	568.904	1012.61	151.324	640.526	669.312	-117.866	364.409	701.384	-106.033	373.508	711.911	-31.4725	278.918	718.91	-54.0906	177.406	688.196	-37.1264	666.912	673.835	392.459	398.887	699.825	424.961	390.463	709.591	351.649	296.232	720.071	385.081	200.212	691.332	376.458
432	4.31	507.447	1239.78	147.172	552.336	1237.59	74.5952	559.239	1234.37	212.274	631.595	1038.18	-19.1786	641.656	1049.3	294.934	568.837	1012.62	151.315	640.512	669.344	-117.886	364.405	701.403	-106.053	373.533	711.912	-31.4978	278.917	718.919	-54.1054	177.416	688.208	-37.146	666.92	673.827	392.477	398.88	699.815	424.943	390.507	709.599	351.614	296.244	720.067	385.066	200.154	691.377	376.461
433	4.32	507.321	1239.84	147.157	552.251	1237.61	74.5916	559.142	1234.43	212.25	631.544	1038.18	-19.2115	641.601	1049.31	294.953	568.761	1012.68	151.329	640.511	669.371	-117.901	364.408	701.433	-106.086	373.553	711.941	-31.5304	278.906	718.942	-54.1172	177.422	688.233	-37.1765	666.923	673.816	392.501	398.948	699.829	424.923	390.378	709.658	351.615	296.238	720.083	385.057	200.131	691.401	376.425
434	4.33	507.224	1239.85	147.169	552.201	1237.61	74.6054	559.117	1234.48	212.254	631.491	1038.24	-19.1892	641.545	1049.3	294.983	568.721	1012.71	151.342	640.525	669.394	-117.93	364.409	701.464	-106.098	373.504	711.978	-31.525	278.9	718.964	-54.1087	177.404	688.271	-37.1569	666.919	673.792	392.524	398.992	699.849	424.937	390.174	709.773	351.655	296.236	720.103	385.069	200.565	691.105	376.405
435	4.34	507.23	1239.83	147.169	552.138	1237.59	74.6294	559.1	1234.45	212.269	631.495	1038.31	-19.1324	641.495	1049.29	295.006	568.738	1012.69	151.338	640.539	669.43	-117.964	364.425	701.473	-106.096	373.49	711.989	-31.5249	278.915	718.968	-54.1103	177.431	688.263	-37.1601	666.958	673.785	392.569	398.996	699.858	424.944	390.251	709.783	351.67	296.237	720.104	385.06	201.556	690.396	376.381
436	4.35	507.211	1239.78	147.15	552.115	1237.57	74.6357	559.07	1234.41	212.273	631.448	1038.32	-19.1481	641.466	1049.27	295.004	568.734	1012.67	151.32	640.55	669.497	-118.005	364.417	701.45	-106.098	373.515	711.983	-31.5497	278.922	718.951	-54.132	177.471	688.237	-37.2013	666.917	673.767	392.625	398.983	699.853	424.95	390.331	709.733	351.64	296.246	720.096	385.023	201.795	690.198	376.359
437	4.36	507.196	1239.71	147.142	552.049	1237.54	74.6649	558.967	1234.37	212.303	631.417	1038.28	-19.175	641.419	1049.24	295.016	568.735	1012.63	151.338	640.55	669.551	-118.051	364.404	701.422	-106.103	373.52	711.957	-31.5389	278.896	718.937	-54.1299	177.453	688.235	-37.1961	666.864	673.735	392.664	398.954	699.827	424.962	390.316	709.692	351.642	296.238	720.066	385.048	201.403	690.456	376.371
438	4.37	507.187	1239.66	147.199	551.978	1237.53	74.7263	558.944	1234.31	212.371	631.388	1038.29	-19.134	641.39	1049.22	295.048	568.775	1012.59	151.379	640.582	669.626	-118.11	364.404	701.408	-106.081	373.544	711.926	-31.5182	278.892	718.936	-54.0921	177.434	688.231	-37.1617	666.877	673.735	392.693	398.939	699.815	424.978	390.268	709.687	351.685	296.253	720.041	385.087	200.466	691.137	376.436
439	4.38	507.226	1239.57	147.274	551.909	1237.49	74.793	558.913	1234.24	212.427	631.377	1038.34	-19.0661	641.387	1049.22	295.08	568.76	1012.57	151.443	640.586	669.672	-118.187	364.38	701.417	-106.054	373.535	711.92	-31.4978	278.884	718.93	-54.0598	177.439	688.201	-37.1091	666.913	673.752	392.711	398.94	699.806	424.995	390.264	709.651	351.699	296.217	720.053	385.083	200.659	690.983	376.456
440	4.39	507.236	1239.5	147.3	551.861	1237.46	74.8214	558.772	1234.21	212.463	631.332	1038.34	-19.0747	641.346	1049.22	295.09	568.731	1012.56	151.449	640.544	669.705	-118.248	364.338	701.407	-106.07	373.49	711.914	-31.4943	278.88	718.908	-54.0688	177.403	688.201	-37.0959	666.926	673.765	392.736	398.887	699.819	424.981	390.298	709.629	351.706	296.206	720.06	385.069	201.091	690.645	376.416
441	4.4	507.176	1239.42	147.279	551.779	1237.43	74.8445	558.676	1234.18	212.513	631.278	1038.4	-19.0435	641.31	1049.2	295.09	568.751	1012.52	151.412	640.507	669.716	-118.303	364.356	701.393	-106.101	373.501	711.915	-31.519	278.891	718.898	-54.0849	177.408	688.183	-37.1246	666.893	673.777	392.765	398.841	699.819	424.984	390.306	709.631	351.665	296.186	720.07	385.062	200.321	691.179	376.425
442	4.41	507.199	1239.35	147.286	551.738	1237.42	74.8706	558.655	1234.13	212.57	631.284	1038.43	-19.0237	641.326	1049.2	295.089	568.766	1012.49	151.406	640.526	669.744	-118.36	364.341	701.403	-106.108	373.527	711.927	-31.5422	278.934	718.895	-54.0909	177.45	688.199	-37.1542	666.898	673.788	392.77	398.857	699.829	424.983	390.291	709.665	351.661	296.189	720.092	385.053	200.608	691.006	376.402
443	4.42	507.142	1239.36	147.353	551.651	1237.44	74.926	558.621	1234.1	212.59	631.293	1038.44	-19.0124	641.315	1049.22	295.093	568.719	1012.53	151.434	640.531	669.763	-118.418	364.356	701.425	-106.114	373.534	711.962	-31.5512	278.927	718.906	-54.0782	177.465	688.215	-37.1487	666.913	673.799	392.756	398.91	699.874	424.988	390.266	709.703	351.669	296.208	720.09	385.059	201.119	690.684	376.39
444	4.43	507.005	1239.4	147.413	551.53	1237.45	74.9782	558.51	1234.09	212.605	631.252	1038.45	-19.0428	641.271	1049.22	295.093	568.638	1012.59	151.436	640.485	669.764	-118.466	364.344	701.456	-106.136	373.505	711.981	-31.5665	278.892	718.934	-54.0861	177.445	688.23	-37.136	666.888	673.781	392.753	398.878	699.878	424.978	390.173	709.722	351.661	296.188	720.092	385.046	200.774	690.917	376.408
445	4.44	506.957	1239.38	147.46	551.423	1237.46	75.0319	558.487	1234.05	212.675	631.195	1038.47	-19.058	641.263	1049.23	295.099	568.594	1012.62	151.405	640.473	669.78	-118.51	364.318	701.477	-106.148	373.492	711.996	-31.5831	278.893	718.954	-54.0939	177.432	688.27	-37.1111	666.909	673.784	392.739	398.866	699.871	424.953	390.206	709.743	351.654	296.188	720.106	385.039	201.565	690.343	376.366
446	4.45	506.947	1239.34	147.552	551.351	1237.45	75.1087	558.481	1233.98	212.763	631.19	1038.48	-19.054	641.284	1049.24	295.122	568.562	1012.64	151.434	640.524	669.817	-118.536	364.32	701.474	-106.132	373.519	712.002	-31.5752	278.887	718.968	-54.0717	177.425	688.279	-37.0943	666.912	673.785	392.722	398.909	699.854	424.95	390.247	709.771	351.665	296.222	720.092	385.046	201.377	690.513	376.389
447	4.46	506.908	1239.28	147.653	551.269	1237.43	75.1847	558.446	1233.91	212.846	631.157	1038.5	-19.0287	641.263	1049.24	295.142	568.524	1012.64	151.487	640.525	669.835	-118.561	364.315	701.47	-106.108	373.551	711.996	-31.5614	278.873	718.968	-54.046	177.445	688.261	-37.0872	666.934	673.779	392.705	398.921	699.838	424.967	390.232	709.74	351.677	296.236	720.081	385.082	200.873	690.871	376.435
448	4.47	506.858	1239.18	147.723	551.153	1237.39	75.2358	558.367	1233.87	212.913	631.075	1038.52	-19.0139	641.223	1049.22	295.132	568.483	1012.59	151.482	640.509	669.857	-118.586	364.303	701.452	-106.126	373.53	711.972	-31.5706	278.865	718.942	-54.0579	177.42	688.253	-37.0954	666.896	673.757	392.714	398.874	699.817	424.961	390.172	709.727	351.679	296.231	720.075	385.08	201.169	690.629	376.407
449	4.48	506.872	1239.07	147.762	551.074	1237.36	75.269	558.282	1233.84	212.967	630.986	1038.52	-19.0156	641.204	1049.2	295.11	568.568	1012.51	151.449	640.499	669.874	-118.616	364.302	701.421	-106.157	373.551	711.947	-31.5966	278.907	718.904	-54.099	177.425	688.201	-37.123	666.854	673.748	392.703	398.859	699.804	424.96	390.212	709.686	351.66	296.22	720.059	385.05	200.811	690.857	376.391
450	4.49	506.917	1238.98	147.835	551.048	1237.34	75.3089	558.296	1233.84	213.033	630.967	1038.55	-19.0079	641.202	1049.18	295.124	568.631	1012.45	151.449	640.496	669.903	-118.654	364.329	701.403	-106.163	373.542	711.938	-31.5953	278.923	718.888	-54.1058	177.439	688.16	-37.115	666.861	673.773	392.698	398.916	699.831	424.982	390.35	709.67	351.684	296.217	720.066	385.054	201.587	690.307	376.352
451	4.5	506.846	1238.97	147.951	550.971	1237.32	75.3806	558.276	1233.82	213.104	630.931	1038.57	-18.9993	641.161	1049.18	295.16	568.576	1012.44	151.504	640.517	669.946	-118.702	364.335	701.415	-106.148	373.49	711.931	-31.5467	278.916	718.894	-54.0791	177.453	688.156	-37.078	666.871	673.774	392.716	398.939	699.838	424.999	390.275	709.699	351.701	296.206	720.077	385.07	201.335	690.491	376.375
452	4.51	506.591	1238.99	148.079	550.87	1237.3	75.4214	558.274	1233.8	213.149	630.886	1038.6	-18.9849	641.126	1049.19	295.19	568.485	1012.49	151.557	640.503	669.967	-118.738	364.292	701.43	-106.13	373.475	711.934	-31.5361	278.883	718.91	-54.0555	177.416	688.182	-37.0773	666.889	673.78	392.723	398.865	699.824	424.98	390.187	709.711	351.688	296.18	720.085	385.064	200.403	691.165	376.415
453	4.52	506.482	1239	148.157	550.819	1237.28	75.4444	558.227	1233.78	213.182	630.827	1038.61	-18.9541	641.106	1049.19	295.216	568.435	1012.5	151.596	640.515	669.995	-118.782	364.283	701.413	-106.122	373.473	711.939	-31.5471	278.869	718.928	-54.0422	177.385	688.199	-37.0659	666.902	673.777	392.723	398.824	699.815	424.95	390.369	709.641	351.672	296.198	720.088	385.06	200.176	691.341	376.427
454	4.53	506.446	1239.01	148.232	550.777	1237.26	75.4741	558.295	1233.75	213.21	630.783	1038.64	-18.9252	641.077	1049.2	295.246	568.396	1012.5	151.659	640.547	670.04	-118.828	364.331	701.411	-106.1	373.485	711.933	-31.5352	278.885	718.936	-54.0203	177.389	688.201	-37.0473	666.896	673.769	392.735	398.844	699.807	424.965	390.397	709.645	351.691	296.242	720.076	385.099	200.13	691.379	376.457
455	4.54	506.334	1239.01	148.319	550.722	1237.25	75.5053	558.384	1233.73	213.185	630.74	1038.66	-18.8868	641.032	1049.21	295.279	568.286	1012.51	151.714	640.562	670.071	-118.889	364.303	701.443	-106.091	373.503	711.952	-31.5258	278.875	718.942	-54.0097	177.381	688.216	-37.039	666.898	673.764	392.756	398.89	699.814	424.987	390.243	709.696	351.727	296.271	720.078	385.109	200.591	691.074	376.458
456	4.55	506.24	1238.99	148.346	550.644	1237.26	75.5207	558.293	1233.72	213.19	630.663	1038.68	-18.8651	640.984	1049.21	295.295	568.214	1012.49	151.7	640.54	670.122	-118.937	364.267	701.462	-106.12	373.51	711.972	-31.5458	278.853	718.948	-54.0202	177.387	688.252	-37.0591	666.855	673.735	392.763	398.901	699.805	424.969	390.134	709.738	351.729	296.263	720.071	385.086	201.551	690.366	376.391
457	4.56	506.095	1238.96	148.371	550.583	1237.26	75.5236	558.15	1233.72	213.25	630.622	1038.72	-18.8812	640.921	1049.18	295.3	568.158	1012.49	151.674	640.48	670.145	-119.01	364.282	701.466	-106.15	373.491	711.98	-31.5774	278.863	718.939	-54.0485	177.417	688.254	-37.0868	666.856	673.748	392.784	398.906	699.813	424.958	390.227	709.71	351.683	296.23	720.084	385.043	201.761	690.19	376.364
458	4.57	505.992	1238.97	148.417	550.548	1237.25	75.5378	557.869	1233.75	213.378	630.583	1038.77	-18.8631	640.876	1049.17	295.321	568.129	1012.49	151.679	640.46	670.193	-119.06	364.3	701.465	-106.157	373.51	711.985	-31.5746	278.878	718.922	-54.0547	177.453	688.254	-37.1113	666.894	673.758	392.825	398.927	699.851	424.989	390.242	709.72	351.655	296.222	720.092	385.026	201.806	690.153	376.351
459	4.58	505.989	1238.93	148.43	550.489	1237.24	75.5581	557.7	1233.76	213.424	630.497	1038.83	-18.8477	640.814	1049.16	295.352	568.131	1012.48	151.708	640.465	670.255	-119.086	364.325	701.462	-106.166	373.524	711.988	-31.5883	278.891	718.911	-54.0517	177.449	688.248	-37.1053	666.898	673.754	392.867	398.914	699.867	425.003	390.273	709.742	351.67	296.198	720.094	385.025	201.366	690.458	376.361
460	4.59	505.929	1238.89	148.422	550.429	1237.23	75.5863	557.543	1233.74	213.466	630.413	1038.86	-18.8526	640.756	1049.15	295.371	568.078	1012.46	151.724	640.443	670.301	-119.157	364.282	701.459	-106.178	373.496	711.974	-31.5796	278.874	718.909	-54.0549	177.453	688.24	-37.1051	666.868	673.734	392.899	398.901	699.857	424.982	390.274	709.749	351.697	296.161	720.106	385.023	200.376	691.155	376.387
461	4.6	505.832	1238.87	148.461	550.385	1237.2	75.617	557.411	1233.71	213.488	630.387	1038.88	-18.8176	640.701	1049.15	295.389	568.072	1012.41	151.751	640.418	670.362	-119.218	364.259	701.451	-106.174	373.527	711.964	-31.5696	278.852	718.918	-54.0488	177.395	688.219	-37.0789	666.85	673.742	392.917	398.871	699.851	424.988	390.313	709.706	351.71	296.15	720.106	385.024	200.561	691.023	376.383
462	4.61	505.73	1238.84	148.526	550.324	1237.16	75.6731	557.372	1233.67	213.54	630.341	1038.9	-18.7783	640.679	1049.15	295.419	568.155	1012.35	151.787	640.392	670.39	-119.266	364.277	701.438	-106.157	373.589	711.948	-31.5822	278.876	718.911	-54.0404	177.404	688.204	-37.0664	666.864	673.762	392.955	398.841	699.833	425.02	390.369	709.648	351.714	296.188	720.066	385.056	201.085	690.66	376.386
463	4.62	505.582	1238.85	148.59	550.247	1237.13	75.7271	557.303	1233.61	213.582	630.28	1038.91	-18.76	640.654	1049.16	295.45	568.124	1012.36	151.833	640.397	670.435	-119.305	364.269	701.436	-106.154	373.575	711.926	-31.5766	278.895	718.9	-54.0261	177.414	688.207	-37.0621	666.893	673.788	392.987	398.775	699.813	425.02	390.355	709.638	351.725	296.184	720.064	385.088	200.795	690.879	376.406
464	4.63	505.436	1238.86	148.651	550.108	1237.13	75.7933	557.384	1233.57	213.594	630.228	1038.94	-18.7438	640.612	1049.17	295.476	567.956	1012.44	151.892	640.385	670.471	-119.356	364.246	701.436	-106.139	373.525	711.939	-31.5662	278.856	718.911	-53.9897	177.39	688.21	-37.05	666.847	673.79	393.01	398.741	699.795	425.011	390.318	709.651	351.716	296.153	720.095	385.102	201.106	690.643	376.403
465	4.64	505.353	1238.85	148.7	550.017	1237.14	75.8344	557.484	1233.54	213.58	630.172	1038.95	-18.7254	640.559	1049.18	295.508	567.809	1012.5	151.939	640.335	670.486	-119.428	364.224	701.449	-106.144	373.505	711.958	-31.568	278.831	718.933	-53.9695	177.368	688.21	-37.0227	666.804	673.763	393.038	398.804	699.8	425.009	390.295	709.677	351.723	296.142	720.097	385.104	200.324	691.203	376.434
466	4.65	505.251	1238.84	148.721	549.956	1237.15	75.8487	557.159	1233.59	213.682	630.134	1038.96	-18.6942	640.529	1049.18	295.534	567.78	1012.51	151.934	640.35	670.518	-119.454	364.236	701.471	-106.173	373.54	711.969	-31.5801	278.836	718.94	-53.9848	177.436	688.199	-37.0348	666.797	673.738	393.066	398.862	699.822	425.016	390.205	709.727	351.742	296.175	720.096	385.094	200.562	691.036	376.428
467	4.66	505.179	1238.82	148.724	549.894	1237.16	75.8617	557.014	1233.61	213.717	630.103	1038.99	-18.6678	640.489	1049.18	295.542	567.737	1012.5	151.931	640.379	670.561	-119.46	364.23	701.486	-106.184	373.521	711.983	-31.5775	278.861	718.931	-54.0096	177.43	688.216	-37.0343	666.814	673.736	393.111	398.878	699.84	425.025	390.16	709.788	351.745	296.177	720.104	385.072	201.051	690.68	376.385
468	4.67	505.082	1238.82	148.741	549.784	1237.16	75.9132	556.959	1233.58	213.766	630.05	1039.02	-18.6776	640.445	1049.18	295.561	567.687	1012.5	151.934	640.357	670.569	-119.493	364.228	701.489	-106.198	373.54	711.989	-31.6016	278.837	718.938	-54.0128	177.388	688.231	-37.0376	666.822	673.752	393.132	398.868	699.845	425.011	390.192	709.795	351.715	296.138	720.109	385.048	200.714	690.901	376.374
469	4.68	504.983	1238.78	148.784	549.722	1237.14	75.9572	556.903	1233.57	213.808	629.99	1039.06	-18.6736	640.397	1049.17	295.58	567.648	1012.5	151.952	640.33	670.571	-119.52	364.225	701.49	-106.182	373.523	711.996	-31.6015	278.839	718.936	-54.0248	177.376	688.23	-37.0501	666.777	673.749	393.126	398.846	699.854	425.008	390.209	709.77	351.717	296.137	720.1	385.035	201.519	690.321	376.34
470	4.69	504.897	1238.74	148.847	549.672	1237.11	75.9884	556.894	1233.55	213.831	629.915	1039.07	-18.6334	640.352	1049.16	295.603	567.63	1012.48	151.982	640.326	670.611	-119.516	364.23	701.489	-106.182	373.496	711.994	-31.5878	278.846	718.927	-54.0311	177.405	688.218	-37.0447	666.788	673.756	393.179	398.815	699.841	425.016	390.176	709.777	351.741	296.153	720.082	385.048	201.727	690.177	376.339
471	4.7	504.78	1238.73	148.898	549.564	1237.08	76.0599	556.948	1233.51	213.874	629.888	1039.1	-18.5824	640.326	1049.16	295.636	567.577	1012.47	152.022	640.338	670.655	-119.509	364.241	701.48	-106.173	373.509	711.972	-31.5566	278.836	718.933	-54.0057	177.38	688.216	-37.0302	666.82	673.786	393.214	398.786	699.831	425.023	390.205	709.764	351.746	296.161	720.09	385.056	201.78	690.142	376.35
472	4.71	504.677	1238.71	148.99	549.446	1237.04	76.1458	556.731	1233.52	213.986	629.799	1039.13	-18.5547	640.293	1049.16	295.668	567.552	1012.49	152.076	640.349	670.717	-119.531	364.258	701.481	-106.165	373.506	711.961	-31.5463	278.835	718.92	-53.9713	177.359	688.228	-37.0133	666.791	673.776	393.22	398.791	699.836	425.03	390.257	709.736	351.749	296.139	720.1	385.059	201.35	690.455	376.364
473	4.72	504.601	1238.67	149.058	549.35	1237.03	76.1993	556.604	1233.48	214.025	629.737	1039.17	-18.5424	640.231	1049.15	295.69	567.536	1012.47	152.101	640.335	670.758	-119.571	364.246	701.479	-106.151	373.501	711.961	-31.5498	278.832	718.908	-53.9746	177.375	688.201	-36.9962	666.765	673.773	393.232	398.782	699.847	425.038	390.318	709.704	351.745	296.124	720.095	385.057	200.361	691.149	376.397
474	4.73	504.531	1238.6	149.072	549.301	1236.99	76.2081	556.536	1233.44	214.052	629.668	1039.19	-18.5218	640.191	1049.14	295.707	567.522	1012.44	152.098	640.326	670.802	-119.589	364.244	701.476	-106.15	373.514	711.955	-31.5766	278.86	718.896	-54.0101	177.397	688.17	-37.0138	666.762	673.763	393.276	398.787	699.818	425.048	390.287	709.69	351.742	296.131	720.096	385.053	200.117	691.319	376.398
475	4.74	504.432	1238.56	149.144	549.209	1236.97	76.256	556.446	1233.44	214.106	629.617	1039.21	-18.4902	640.162	1049.14	295.742	567.47	1012.44	152.113	640.336	670.846	-119.593	364.237	701.481	-106.143	373.522	711.956	-31.5681	278.869	718.901	-54.0045	177.427	688.172	-37.0168	666.771	673.769	393.296	398.785	699.81	425.043	390.2	709.731	351.761	296.152	720.095	385.055	200.07	691.367	376.394
476	4.75	504.309	1238.58	149.223	549.096	1236.97	76.3299	556.341	1233.44	214.196	629.596	1039.24	-18.4535	640.125	1049.16	295.767	567.422	1012.46	152.148	640.353	670.903	-119.628	364.245	701.482	-106.139	373.509	711.955	-31.5386	278.861	718.917	-53.9652	177.424	688.196	-36.9817	666.782	673.779	393.316	398.796	699.822	425.054	390.218	709.756	351.779	296.182	720.103	385.075	200.063	691.395	376.41
477	4.76	504.206	1238.57	149.251	549.004	1236.98	76.3672	556.298	1233.42	214.204	629.574	1039.28	-18.4132	640.079	1049.15	295.784	567.408	1012.47	152.156	640.316	670.917	-119.672	364.213	701.5	-106.124	373.512	711.973	-31.5558	278.852	718.923	-53.9668	177.394	688.201	-36.9726	666.742	673.762	393.319	398.783	699.823	425.059	390.256	709.726	351.761	296.183	720.109	385.076	200.464	691.088	376.403
478	4.77	504.103	1238.56	149.245	548.921	1236.95	76.3923	556.303	1233.34	214.225	629.492	1039.31	-18.401	640.045	1049.15	295.793	567.375	1012.47	152.148	640.251	670.918	-119.704	364.206	701.504	-106.158	373.494	711.98	-31.572	278.858	718.921	-53.9878	177.413	688.188	-37.0216	666.714	673.734	393.319	398.767	699.815	425.041	390.245	709.715	351.748	296.187	720.101	385.073	201.003	690.69	376.378
479	4.78	504.01	1238.51	149.261	548.841	1236.93	76.436	556.111	1233.34	214.271	629.447	1039.34	-18.3926	640.027	1049.13	295.8	567.338	1012.47	152.153	640.258	670.95	-119.748	364.187	701.501	-106.194	373.496	711.98	-31.5934	278.855	718.927	-53.9975	177.393	688.213	-37.0306	666.772	673.747	393.347	398.779	699.804	425.034	390.196	709.733	351.771	296.174	720.083	385.059	200.722	690.889	376.368
480	4.79	503.961	1238.48	149.291	548.76	1236.93	76.4891	556.016	1233.34	214.32	629.445	1039.38	-18.3729	640.01	1049.13	295.819	567.304	1012.47	152.187	640.245	670.977	-119.802	364.192	701.509	-106.177	373.521	711.992	-31.5796	278.827	718.936	-53.9755	177.386	688.224	-37.0132	666.754	673.729	393.365	398.805	699.805	425.041	390.202	709.738	351.773	296.197	720.069	385.064	201.544	690.31	376.343
481	4.8	503.906	1238.45	149.277	548.654	1236.93	76.5375	555.968	1233.35	214.343	629.394	1039.42	-18.345	639.96	1049.14	295.826	567.197	1012.51	152.218	640.213	670.996	-119.841	364.176	701.52	-106.18	373.505	711.993	-31.5784	278.825	718.928	-53.9745	177.36	688.227	-36.9965	666.745	673.721	393.358	398.803	699.819	425.042	390.104	709.785	351.785	296.21	720.079	385.077	201.271	690.482	376.354
482	4.81	503.86	1238.4	149.272	548.562	1236.91	76.5763	555.979	1233.31	214.337	629.32	1039.46	-18.3247	639.922	1049.14	295.835	567.13	1012.52	152.21	640.187	671.023	-119.871	364.158	701.539	-106.207	373.464	711.996	-31.588	278.834	718.93	-53.9939	177.351	688.213	-37.011	666.707	673.687	393.395	398.815	699.837	425.042	390.161	709.804	351.765	296.173	720.098	385.067	200.768	690.823	376.372
483	4.82	503.849	1238.32	149.259	548.537	1236.9	76.58	555.978	1233.25	214.318	629.228	1039.49	-18.3148	639.891	1049.14	295.844	567.142	1012.5	152.192	640.161	671.056	-119.917	364.144	701.511	-106.214	373.478	712	-31.6226	278.839	718.928	-54.0226	177.362	688.185	-37.003	666.719	673.712	393.436	398.794	699.834	425.038	390.128	709.826	351.753	296.143	720.115	385.032	201.087	690.598	376.339
484	4.83	503.804	1238.29	149.303	548.499	1236.89	76.5994	555.803	1233.28	214.363	629.178	1039.54	-18.2978	639.844	1049.14	295.852	567.083	1012.51	152.217	640.148	671.103	-119.935	364.161	701.498	-106.223	373.51	712.003	-31.6279	278.857	718.922	-54.0245	177.373	688.19	-36.9933	666.725	673.739	393.45	398.791	699.836	425.04	390.224	709.767	351.767	296.129	720.124	385.027	200.29	691.178	376.356
485	4.84	503.64	1238.3	149.37	548.392	1236.89	76.6656	555.699	1233.28	214.432	629.135	1039.55	-18.2784	639.798	1049.15	295.875	567.005	1012.53	152.265	640.134	671.157	-119.946	364.149	701.497	-106.209	373.532	712.003	-31.6173	278.827	718.927	-53.9771	177.358	688.193	-36.9795	666.655	673.712	393.462	398.77	699.824	425.048	390.2	709.736	351.758	296.097	720.122	385.048	200.048	691.345	376.387
486	4.85	503.642	1238.21	149.425	548.285	1236.86	76.7385	555.575	1233.22	214.481	629.062	1039.58	-18.2613	639.751	1049.14	295.91	566.996	1012.53	152.295	640.109	671.199	-119.985	364.137	701.481	-106.194	373.498	711.995	-31.5982	278.803	718.919	-53.9477	177.321	688.184	-36.9434	666.669	673.732	393.482	398.769	699.813	425.053	390.215	709.697	351.753	296.113	720.107	385.067	199.995	691.378	376.404
487	4.86	503.655	1238.1	149.455	548.227	1236.82	76.7803	555.403	1233.14	214.507	629.051	1039.61	-18.2353	639.724	1049.13	295.915	567.035	1012.52	152.301	640.069	671.216	-120.039	364.143	701.466	-106.193	373.567	711.981	-31.6011	278.834	718.912	-53.9569	177.354	688.158	-36.9345	666.691	673.75	393.536	398.764	699.799	425.061	390.29	709.656	351.749	296.126	720.086	385.083	200.473	691.047	376.39
488	4.87	503.562	1238.05	149.49	548.195	1236.8	76.8008	555.292	1233.13	214.519	629.026	1039.62	-18.2385	639.689	1049.13	295.913	567.063	1012.49	152.294	640.074	671.251	-120.088	364.151	701.463	-106.197	373.614	711.973	-31.6141	278.855	718.901	-53.9525	177.371	688.149	-36.919	666.714	673.765	393.554	398.732	699.792	425.072	390.192	709.716	351.777	296.171	720.06	385.096	201.462	690.336	376.352
489	4.88	503.495	1238.01	149.482	548.087	1236.81	76.8528	555.183	1233.1	214.537	628.98	1039.63	-18.2432	639.639	1049.13	295.916	566.893	1012.55	152.308	640.053	671.268	-120.136	364.131	701.466	-106.2	373.57	711.981	-31.6228	278.815	718.923	-53.959	177.336	688.173	-36.9085	666.726	673.77	393.558	398.737	699.793	425.082	390.172	709.732	351.793	296.15	720.064	385.096	201.677	690.155	376.358
490	4.89	503.362	1238.02	149.445	547.996	1236.81	76.8665	555.119	1233.11	214.538	628.944	1039.65	-18.2388	639.594	1049.14	295.917	566.768	1012.62	152.31	640.043	671.296	-120.185	364.112	701.495	-106.225	373.504	712.004	-31.6291	278.771	718.945	-53.9579	177.304	688.219	-36.9297	666.708	673.744	393.572	398.748	699.806	425.081	390.085	709.774	351.8	296.145	720.071	385.075	201.706	690.117	376.358
491	4.9	503.247	1238	149.417	547.951	1236.82	76.8652	555.073	1233.14	214.551	628.923	1039.7	-18.2325	639.59	1049.16	295.911	566.768	1012.65	152.277	640.011	671.312	-120.227	364.118	701.515	-106.255	373.471	712.016	-31.6376	278.79	718.937	-53.9812	177.337	688.223	-36.9923	666.647	673.747	393.591	398.764	699.859	425.079	390.031	709.829	351.794	296.164	720.092	385.036	201.73	690.121	376.336
492	4.91	503.224	1237.93	149.407	547.88	1236.83	76.8795	555.035	1233.14	214.575	628.886	1039.75	-18.2459	639.572	1049.16	295.911	566.739	1012.66	152.248	639.984	671.335	-120.267	364.113	701.532	-106.264	373.491	712.032	-31.6532	278.82	718.93	-53.9981	177.374	688.22	-37.0018	666.643	673.747	393.626	398.8	699.871	425.065	390.033	709.845	351.768	296.157	720.117	385.022	201.714	690.12	376.314
493	4.92	503.125	1237.91	149.43	547.792	1236.83	76.9185	554.978	1233.13	214.614	628.854	1039.77	-18.2645	639.522	1049.17	295.914	566.622	1012.72	152.265	639.972	671.377	-120.315	364.124	701.534	-106.275	373.489	712.045	-31.6597	278.797	718.938	-53.9949	177.364	688.21	-36.9925	666.646	673.755	393.645	398.806	699.864	425.054	390.024	709.85	351.767	296.127	720.106	385.028	201.249	690.44	376.328
494	4.93	503.09	1237.86	149.455	547.709	1236.8	76.961	554.907	1233.09	214.613	628.821	1039.78	-18.2663	639.464	1049.18	295.915	566.581	1012.73	152.256	639.934	671.407	-120.356	364.134	701.524	-106.278	373.495	712.054	-31.6741	278.796	718.926	-54.0012	177.333	688.208	-36.9709	666.653	673.791	393.659	398.781	699.858	425.048	390.078	709.82	351.751	296.086	720.113	385.03	200.285	691.149	376.356
495	4.94	503.121	1237.79	149.481	547.646	1236.78	76.9898	554.879	1233.05	214.604	628.773	1039.8	-18.2487	639.425	1049.17	295.917	566.593	1012.71	152.259	639.905	671.439	-120.392	364.134	701.495	-106.268	373.496	712.036	-31.6661	278.821	718.913	-54.0106	177.366	688.171	-36.9621	666.676	673.833	393.69	398.738	699.839	425.043	390.117	709.779	351.748	296.085	720.137	385.031	200.043	691.314	376.374
496	4.95	503.093	1237.73	149.508	547.56	1236.75	77.0517	554.815	1233.02	214.651	628.722	1039.82	-18.2529	639.367	1049.18	295.923	566.537	1012.71	152.295	639.884	671.483	-120.452	364.11	701.47	-106.258	373.531	712.014	-31.664	278.818	718.921	-53.9827	177.403	688.156	-36.9514	666.659	673.821	393.708	398.697	699.836	425.054	390.134	709.756	351.784	296.091	720.119	385.052	199.98	691.347	376.403
497	4.96	503.032	1237.7	149.561	547.507	1236.73	77.0844	554.761	1232.98	214.685	628.692	1039.85	-18.2364	639.336	1049.18	295.926	566.474	1012.73	152.307	639.83	671.512	-120.525	364.083	701.47	-106.236	373.515	712.018	-31.6551	278.824	718.913	-53.9711	177.364	688.144	-36.9397	666.619	673.799	393.707	398.695	699.838	425.069	390.164	709.725	351.793	296.068	720.097	385.06	199.966	691.361	376.396
498	4.97	503.017	1237.63	149.623	547.448	1236.72	77.1029	554.737	1232.97	214.702	628.629	1039.86	-18.2301	639.308	1049.18	295.926	566.429	1012.73	152.322	639.802	671.529	-120.559	364.054	701.471	-106.235	373.523	712.013	-31.6749	278.847	718.896	-53.9813	177.352	688.159	-36.9452	666.59	673.806	393.731	398.695	699.828	425.089	390.201	709.724	351.772	296.076	720.088	385.053	199.96	691.355	376.39
499	4.98	502.931	1237.63	149.649	547.339	1236.73	77.1298	554.699	1232.96	214.717	628.563	1039.87	-18.2214	639.263	1049.19	295.936	566.365	1012.73	152.334	639.773	671.53	-120.583	364.058	701.463	-106.246	373.541	712.014	-31.6749	278.83	718.901	-53.9745	177.378	688.168	-36.9204	666.599	673.83	393.762	398.72	699.83	425.105	390.282	709.696	351.761	296.083	720.092	385.068	199.969	691.343	376.396
500	4.99	502.806	1237.66	149.706	547.251	1236.75	77.1682	554.641	1232.96	214.717	628.516	1039.86	-18.2063	639.233	1049.21	295.947	566.275	1012.75	152.36	639.783	671.554	-120.626	364.051	701.471	-106.251	373.553	712.017	-31.673	278.791	718.924	-53.9526	177.364	688.179	-36.9084	666.623	673.843	393.776	398.743	699.828	425.104	390.141	709.751	351.782	296.078	720.078	385.095	200.401	691.028	376.394
501	5	502.745	1237.67	149.711	547.201	1236.76	77.1883	554.558	1232.98	214.775	628.481	1039.88	-18.2156	639.193	1049.23	295.966	566.201	1012.77	152.38	639.803	671.589	-120.684	364.068	701.466	-106.264	373.554	712.028	-31.691	278.783	718.927	-53.9484	177.278	688.187	-36.8911	666.62	673.86	393.787	398.722	699.821	425.101	390.111	709.775	351.803	296.097	720.072	385.104	201.382	690.319	376.355
502	5.01	502.769	1237.64	149.676	547.142	1236.74	77.1992	554.463	1232.99	214.77	628.429	1039.9	-18.2172	639.142	1049.25	295.98	566.176	1012.78	152.366	639.774	671.619	-120.722	364.048	701.471	-106.272	373.527	712.036	-31.7008	278.813	718.92	-53.9823	177.287	688.197	-36.9156	666.627	673.899	393.815	398.724	699.843	425.09	390.049	709.784	351.781	296.117	720.075	385.078	201.637	690.151	376.337
503	5.02	502.707	1237.65	149.657	547.056	1236.74	77.2072	554.413	1233.01	214.756	628.342	1039.91	-18.2199	639.071	1049.26	295.988	566.055	1012.79	152.36	639.752	671.665	-120.744	364.016	701.492	-106.288	373.502	712.051	-31.7023	278.81	718.925	-54.0018	177.305	688.18	-36.9209	666.62	673.928	393.822	398.698	699.852	425.064	390.004	709.814	351.772	296.106	720.086	385.048	201.674	690.107	376.32
504	5.03	502.666	1237.64	149.643	546.957	1236.74	77.2332	554.386	1233.03	214.774	628.254	1039.95	-18.2106	639.002	1049.28	296	565.932	1012.83	152.366	639.742	671.729	-120.782	364.033	701.509	-106.294	373.487	712.055	-31.7133	278.787	718.937	-53.9897	177.3	688.194	-36.923	666.627	673.963	393.846	398.671	699.871	425.048	389.945	709.855	351.779	296.079	720.093	385.025	201.668	690.111	376.314
505	5.04	502.515	1237.66	149.674	546.85	1236.75	77.2716	554.331	1233.04	214.803	628.206	1040.01	-18.2034	638.955	1049.31	296.012	565.836	1012.87	152.386	639.748	671.799	-120.808	364.059	701.517	-106.296	373.469	712.08	-31.7061	278.782	718.956	-53.9757	177.254	688.212	-36.9108	666.655	673.988	393.891	398.684	699.889	425.066	389.974	709.848	351.778	296.089	720.113	385.029	201.655	690.139	376.319
506	5.05	502.476	1237.67	149.689	546.771	1236.75	77.2935	554.299	1233.04	214.808	628.162	1040.04	-18.1996	638.917	1049.33	296.025	565.844	1012.87	152.387	639.751	671.884	-120.835	364.049	701.539	-106.298	373.495	712.073	-31.7039	278.761	718.958	-53.9699	177.23	688.232	-36.8944	666.619	673.99	393.956	398.703	699.894	425.082	390.128	709.818	351.777	296.09	720.121	385.033	201.615	690.147	376.327
507	5.06	502.487	1237.66	149.69	546.725	1236.73	77.2953	554.238	1233.06	214.811	628.104	1040.06	-18.1969	638.86	1049.32	296.037	565.803	1012.88	152.388	639.736	671.937	-120.862	364.061	701.539	-106.296	373.502	712.075	-31.7297	278.753	718.954	-53.9867	177.274	688.23	-36.9083	666.559	673.975	393.997	398.684	699.892	425.088	390.097	709.823	351.755	296.035	720.144	385.021	201.624	690.131	376.315
508	5.07	502.47	1237.66	149.704	546.693	1236.7	77.3053	554.191	1233.06	214.829	628.074	1040.08	-18.1797	638.829	1049.31	296.041	565.768	1012.89	152.392	639.718	671.986	-120.897	364.068	701.531	-106.287	373.49	712.082	-31.7111	278.77	718.96	-53.9842	177.305	688.223	-36.8895	666.553	673.975	394.039	398.657	699.887	425.098	390.177	709.789	351.776	296.049	720.151	385.043	201.218	690.437	376.335
509	5.08	502.421	1237.69	149.798	546.651	1236.67	77.3469	554.198	1233.06	214.859	628.044	1040.09	-18.147	638.803	1049.29	296.065	565.695	1012.91	152.434	639.728	672.038	-120.94	364.035	701.521	-106.263	373.492	712.076	-31.6799	278.743	718.963	-53.9337	177.288	688.2	-36.8553	666.582	673.99	394.061	398.688	699.871	425.109	390.3	709.727	351.803	296.043	720.132	385.076	200.254	691.13	376.392
510	5.09	502.422	1237.65	149.849	546.571	1236.65	77.3798	554.161	1233.04	214.879	628	1040.09	-18.1648	638.758	1049.27	296.081	565.57	1012.94	152.488	639.721	672.077	-121.02	363.991	701.496	-106.256	373.465	712.055	-31.6713	278.705	718.948	-53.9011	177.246	688.184	-36.831	666.588	673.973	394.088	398.701	699.853	425.115	390.328	709.696	351.81	296.073	720.108	385.11	200.429	690.981	376.409
511	5.1	502.482	1237.58	149.831	546.527	1236.63	77.3731	554.13	1233.02	214.89	627.935	1040.07	-18.1767	638.732	1049.25	296.077	565.542	1012.93	152.47	639.732	672.131	-121.097	363.966	701.478	-106.274	373.466	712.037	-31.6913	278.71	718.934	-53.9177	177.244	688.164	-36.8546	666.534	673.93	394.129	398.673	699.838	425.128	390.292	709.685	351.783	296.081	720.077	385.103	201.34	690.301	376.37
512	5.11	502.491	1237.56	149.816	546.509	1236.61	77.3743	554.081	1233.02	214.876	627.903	1040.08	-18.1498	638.725	1049.24	296.074	565.6	1012.91	152.443	639.766	672.213	-121.161	363.972	701.471	-106.292	373.525	712.032	-31.7123	278.779	718.9	-53.9449	177.268	688.149	-36.8764	666.57	673.971	394.144	398.64	699.833	425.136	390.237	709.717	351.799	296.13	720.055	385.11	201.604	690.108	376.339
513	5.12	502.456	1237.57	149.824	546.465	1236.61	77.4048	554.118	1233.06	214.878	627.904	1040.12	-18.1509	638.714	1049.25	296.077	565.54	1012.93	152.468	639.749	672.257	-121.234	363.979	701.468	-106.293	373.521	712.029	-31.6967	278.775	718.894	-53.9387	177.27	688.143	-36.8644	666.601	674.004	394.166	398.679	699.814	425.138	390.24	709.737	351.856	296.126	720.047	385.111	201.66	690.056	376.343
514	5.13	502.385	1237.58	149.81	546.421	1236.64	77.3983	554.172	1233.07	214.877	627.875	1040.15	-18.1767	638.691	1049.27	296.074	565.434	1012.96	152.465	639.729	672.284	-121.308	363.995	701.495	-106.316	373.48	712.048	-31.7142	278.762	718.906	-53.9581	177.271	688.132	-36.8848	666.598	674.025	394.192	398.686	699.83	425.126	390.183	709.768	351.852	296.085	720.069	385.089	201.647	690.06	376.341
515	5.14	502.353	1237.64	149.775	546.434	1236.66	77.3605	554.165	1233.09	214.879	627.807	1040.17	-18.1731	638.656	1049.31	296.06	565.423	1013	152.406	639.706	672.333	-121.381	364.012	701.517	-106.365	373.486	712.071	-31.7604	278.768	718.916	-53.9939	177.249	688.149	-36.9289	666.569	674.007	394.201	398.653	699.851	425.116	390.066	709.825	351.808	296.071	720.087	385.05	201.217	690.387	376.332
516	5.15	502.288	1237.7	149.777	546.436	1236.68	77.349	554.148	1233.12	214.855	627.762	1040.2	-18.1722	638.631	1049.35	296.052	565.391	1013.06	152.399	639.694	672.383	-121.447	364.001	701.54	-106.372	373.496	712.094	-31.7634	278.747	718.943	-53.9929	177.309	688.182	-36.9493	666.57	674.027	394.23	398.646	699.875	425.105	390.015	709.85	351.809	296.052	720.098	385.044	200.686	690.804	376.331
517	5.16	502.215	1237.8	149.85	546.411	1236.7	77.3733	554.155	1233.13	214.873	627.726	1040.22	-18.1629	638.598	1049.39	296.069	565.29	1013.14	152.457	639.656	672.437	-121.513	363.98	701.561	-106.356	373.497	712.118	-31.7615	278.722	718.984	-53.9434	177.297	688.208	-36.9299	666.575	674.094	394.242	398.676	699.907	425.108	390.006	709.879	351.835	296.027	720.132	385.073	201.394	690.304	376.332
518	5.17	502.184	1237.81	149.874	546.403	1236.72	77.3847	554.091	1233.14	214.861	627.699	1040.24	-18.1631	638.574	1049.41	296.077	565.209	1013.19	152.479	639.611	672.474	-121.587	363.965	701.548	-106.348	373.487	712.116	-31.7716	278.707	718.997	-53.9154	177.213	688.233	-36.895	666.573	674.115	394.224	398.666	699.912	425.11	389.992	709.877	351.838	296.011	720.143	385.081	201.133	690.5	376.357
519	5.18	502.299	1237.75	149.842	546.417	1236.72	77.3702	554.125	1233.13	214.848	627.672	1040.24	-18.1763	638.559	1049.4	296.062	565.238	1013.18	152.46	639.604	672.497	-121.646	363.938	701.525	-106.356	373.502	712.094	-31.7854	278.721	718.98	-53.9389	177.21	688.201	-36.8871	666.549	674.108	394.25	398.622	699.899	425.103	390.036	709.829	351.824	296.028	720.13	385.071	200.649	690.843	376.363
520	5.19	502.415	1237.73	149.827	546.422	1236.72	77.3683	554.223	1233.13	214.843	627.63	1040.22	-18.1853	638.53	1049.39	296.044	565.276	1013.14	152.45	639.638	672.54	-121.684	363.945	701.499	-106.363	373.532	712.091	-31.7807	278.744	718.955	-53.9539	177.251	688.151	-36.8862	666.552	674.148	394.294	398.622	699.885	425.102	390.128	709.791	351.818	296.09	720.098	385.059	201.395	690.283	376.344
521	5.2	502.402	1237.73	149.855	546.445	1236.72	77.3823	554.232	1233.13	214.877	627.612	1040.22	-18.1937	638.49	1049.39	296.043	565.28	1013.11	152.466	639.628	672.564	-121.71	363.946	701.474	-106.344	373.553	712.078	-31.7636	278.757	718.935	-53.9397	177.241	688.129	-36.8576	666.594	674.175	394.314	398.635	699.865	425.115	390.232	709.75	351.82	296.11	720.066	385.087	201.577	690.128	376.352
522	5.21	502.355	1237.76	149.882	546.425	1236.74	77.3921	554.191	1233.16	214.883	627.537	1040.22	-18.1876	638.448	1049.4	296.042	565.178	1013.14	152.481	639.592	672.581	-121.771	363.915	701.472	-106.337	373.512	712.06	-31.7481	278.76	718.922	-53.934	177.206	688.133	-36.8384	666.553	674.177	394.327	398.586	699.854	425.126	390.224	709.735	351.844	296.088	720.06	385.117	201.584	690.082	376.36
523	5.22	502.406	1237.78	149.814	546.438	1236.76	77.357	554.104	1233.18	214.853	627.484	1040.24	-18.2122	638.413	1049.42	296.032	565.183	1013.14	152.436	639.583	672.617	-121.82	363.908	701.482	-106.353	373.483	712.06	-31.7564	278.746	718.915	-53.9393	177.234	688.136	-36.8789	666.53	674.206	394.314	398.575	699.86	425.118	390.199	709.754	351.86	296.051	720.058	385.121	201.589	690.056	376.353
524	5.23	502.39	1237.82	149.783	546.453	1236.78	77.3297	554.115	1233.2	214.829	627.481	1040.27	-18.2147	638.4	1049.45	296.013	565.245	1013.16	152.396	639.563	672.641	-121.845	363.896	701.509	-106.362	373.494	712.061	-31.7651	278.761	718.921	-53.952	177.258	688.118	-36.9009	666.483	674.19	394.334	398.612	699.862	425.12	390.141	709.779	351.823	296.031	720.069	385.108	201.595	690.059	376.348
525	5.24	502.362	1237.88	149.77	546.432	1236.82	77.3124	554.102	1233.22	214.811	627.463	1040.29	-18.2179	638.393	1049.48	295.999	565.176	1013.21	152.384	639.549	672.651	-121.888	363.885	701.517	-106.368	373.492	712.1	-31.7862	278.739	718.946	-53.9482	177.289	688.11	-36.8978	666.412	674.167	394.341	398.634	699.887	425.137	390.108	709.816	351.841	296.014	720.087	385.08	201.614	690.075	376.354
526	5.25	502.27	1237.97	149.756	546.441	1236.87	77.28	554.056	1233.23	214.792	627.426	1040.3	-18.2493	638.349	1049.51	295.984	565.071	1013.29	152.363	639.586	672.696	-121.931	363.881	701.532	-106.362	373.5	712.124	-31.8052	278.7	718.969	-53.9473	177.243	688.141	-36.8845	666.4	674.214	394.368	398.598	699.901	425.135	390.079	709.831	351.822	295.971	720.132	385.085	201.17	690.412	376.35
527	5.26	502.171	1238.07	149.727	546.423	1236.9	77.2586	553.996	1233.24	214.776	627.401	1040.3	-18.284	638.286	1049.54	295.959	565.003	1013.36	152.35	639.57	672.713	-121.974	363.866	701.541	-106.379	373.481	712.137	-31.8213	278.668	718.989	-53.9451	177.17	688.175	-36.8491	666.447	674.255	394.376	398.583	699.883	425.105	390.102	709.835	351.803	295.937	720.153	385.078	200.615	690.822	376.36
528	5.27	502.154	1238.13	149.709	546.421	1236.93	77.2451	553.988	1233.26	214.768	627.435	1040.34	-18.3095	638.234	1049.55	295.945	564.99	1013.38	152.344	639.554	672.709	-122.001	363.896	701.523	-106.407	373.501	712.131	-31.8315	278.704	718.985	-53.9655	177.16	688.184	-36.8462	666.454	674.26	394.398	398.618	699.892	425.096	390.076	709.835	351.83	295.96	720.152	385.056	200.906	690.599	376.358
529	5.28	502.2	1238.13	149.704	546.431	1236.93	77.2353	554.038	1233.27	214.76	627.461	1040.36	-18.3344	638.206	1049.56	295.932	565.008	1013.38	152.315	639.563	672.709	-122.041	363.914	701.495	-106.407	373.52	712.128	-31.83	278.759	718.963	-53.9733	177.205	688.154	-36.8705	666.457	674.266	394.427	398.636	699.894	425.103	390.089	709.823	351.838	296.035	720.132	385.055	200.137	691.149	376.377
530	5.29	502.205	1238.14	149.696	546.443	1236.94	77.2093	554.092	1233.27	214.732	627.462	1040.36	-18.3826	638.17	1049.56	295.908	564.948	1013.41	152.303	639.563	672.727	-122.08	363.883	701.507	-106.412	373.524	712.13	-31.8429	278.758	718.943	-53.9626	177.215	688.143	-36.8798	666.503	674.32	394.44	398.618	699.895	425.09	390.111	709.828	351.818	296.03	720.117	385.047	200.355	690.966	376.361
531	5.3	502.205	1238.14	149.683	546.46	1236.94	77.1812	554.05	1233.29	214.714	627.448	1040.36	-18.4095	638.106	1049.58	295.893	564.897	1013.43	152.301	639.547	672.771	-122.115	363.891	701.503	-106.431	373.499	712.121	-31.8442	278.764	718.938	-53.9796	177.227	688.127	-36.8845	666.502	674.372	394.471	398.609	699.896	425.1	390.199	709.778	351.791	296.02	720.098	385.047	201.275	690.285	376.321
532	5.31	502.251	1238.12	149.681	546.472	1236.95	77.1591	554.025	1233.29	214.729	627.405	1040.38	-18.4196	638.045	1049.61	295.881	564.932	1013.42	152.28	639.549	672.807	-122.126	363.884	701.486	-106.422	373.514	712.119	-31.8497	278.763	718.931	-53.984	177.242	688.101	-36.8969	666.461	674.4	394.511	398.602	699.916	425.119	390.233	709.762	351.796	295.99	720.085	385.053	201.515	690.11	376.332
533	5.32	502.289	1238.1	149.663	546.45	1236.97	77.1634	553.99	1233.29	214.745	627.364	1040.38	-18.4374	638.003	1049.63	295.868	564.973	1013.42	152.247	639.551	672.833	-122.154	363.867	701.473	-106.4	373.551	712.108	-31.8398	278.748	718.926	-53.9682	177.207	688.104	-36.8856	666.459	674.424	394.562	398.574	699.929	425.126	390.184	709.768	351.814	295.998	720.084	385.061	201.586	690.072	376.339
534	5.33	502.259	1238.13	149.677	546.423	1236.98	77.1734	553.96	1233.29	214.711	627.349	1040.39	-18.439	637.962	1049.68	295.868	564.934	1013.45	152.245	639.576	672.854	-122.198	363.847	701.483	-106.387	373.561	712.109	-31.8207	278.729	718.945	-53.939	177.238	688.099	-36.8625	666.417	674.445	394.586	398.592	699.934	425.133	390.193	709.746	351.813	296.026	720.072	385.068	201.586	690.086	376.348
535	5.34	502.123	1238.21	149.696	546.386	1236.98	77.1563	553.893	1233.3	214.677	627.308	1040.38	-18.4494	637.896	1049.72	295.85	564.778	1013.53	152.265	639.551	672.865	-122.24	363.84	701.484	-106.379	373.535	712.126	-31.8184	278.679	718.964	-53.9187	177.169	688.117	-36.8211	666.47	674.529	394.635	398.582	699.908	425.131	390.151	709.727	351.806	296.021	720.084	385.065	201.553	690.095	376.352
536	5.35	502.046	1238.24	149.67	546.339	1237.01	77.1291	553.84	1233.31	214.657	627.252	1040.39	-18.4628	637.836	1049.75	295.835	564.717	1013.57	152.233	639.497	672.867	-122.27	363.813	701.478	-106.403	373.498	712.133	-31.8341	278.657	718.977	-53.9181	177.122	688.149	-36.8174	666.435	674.549	394.694	398.538	699.9	425.127	390.236	709.71	351.803	296.043	720.087	385.078	201.538	690.085	376.342
537	5.36	502.061	1238.24	149.618	546.329	1237	77.1127	553.772	1233.31	214.63	627.236	1040.39	-18.4809	637.798	1049.77	295.818	564.792	1013.56	152.176	639.499	672.882	-122.305	363.809	701.475	-106.406	373.503	712.136	-31.8595	278.686	718.97	-53.9398	177.134	688.138	-36.855	666.397	674.545	394.726	398.533	699.927	425.14	390.158	709.805	351.844	296.051	720.075	385.075	201.533	690.073	376.34
538	5.37	502.062	1238.23	149.547	546.324	1237.01	77.074	553.716	1233.32	214.614	627.238	1040.41	-18.5222	637.773	1049.8	295.781	564.765	1013.58	152.129	639.526	672.896	-122.351	363.801	701.484	-106.427	373.499	712.146	-31.8717	278.69	718.96	-53.9631	177.16	688.119	-36.8821	666.395	674.577	394.763	398.55	699.958	425.146	390.023	709.862	351.88	296.008	720.068	385.059	201.547	690.061	376.334
539	5.38	502.015	1238.25	149.476	546.277	1237.03	77.0077	553.656	1233.32	214.569	627.254	1040.42	-18.5493	637.724	1049.83	295.743	564.694	1013.59	152.079	639.516	672.902	-122.366	363.817	701.487	-106.458	373.499	712.154	-31.8942	278.696	718.953	-53.9883	177.152	688.106	-36.8945	666.368	674.597	394.791	398.573	699.954	425.129	390.046	709.86	351.842	295.974	720.086	385.039	201.542	690.06	376.32
540	5.39	501.909	1238.28	149.445	546.246	1237.05	76.9638	553.615	1233.34	214.503	627.272	1040.45	-18.5764	637.664	1049.85	295.713	564.651	1013.65	152.022	639.499	672.902	-122.374	363.803	701.494	-106.48	373.499	712.177	-31.9145	278.718	718.965	-54.0081	177.153	688.12	-36.9194	666.341	674.624	394.829	398.609	699.96	425.125	390.02	709.893	351.806	295.976	720.112	385.014	201.114	690.377	376.319
541	5.4	501.861	1238.3	149.45	546.204	1237.06	76.9346	553.615	1233.33	214.474	627.254	1040.45	-18.5864	637.602	1049.89	295.698	564.602	1013.73	152.017	639.487	672.93	-122.408	363.77	701.516	-106.463	373.479	712.192	-31.9195	278.721	718.991	-54.0037	177.157	688.154	-36.9193	666.335	674.659	394.838	398.63	699.992	425.127	390.029	709.874	351.82	295.962	720.131	385.024	200.591	690.785	376.336
542	5.41	501.785	1238.31	149.483	546.126	1237.07	76.9405	553.568	1233.32	214.457	627.242	1040.46	-18.5965	637.542	1049.93	295.695	564.508	1013.79	152.054	639.505	672.956	-122.441	363.765	701.529	-106.448	373.468	712.182	-31.8985	278.69	719.012	-53.9703	177.114	688.179	-36.8784	666.317	674.7	394.856	398.607	700.002	425.132	390.038	709.836	351.839	295.959	720.148	385.065	200.878	690.594	376.359
543	5.42	501.725	1238.25	149.485	546.061	1237.03	76.9414	553.535	1233.31	214.446	627.201	1040.45	-18.599	637.472	1049.94	295.696	564.463	1013.81	152.061	639.501	672.946	-122.457	363.765	701.522	-106.429	373.462	712.169	-31.875	278.657	719.007	-53.9404	177.128	688.164	-36.8611	666.286	674.72	394.878	398.59	699.991	425.141	390.204	709.757	351.834	295.943	720.144	385.096	200.049	691.166	376.414
544	5.43	501.811	1238.12	149.442	546.037	1236.98	76.8956	553.41	1233.28	214.407	627.127	1040.43	-18.6022	637.408	1049.94	295.672	564.509	1013.77	152.019	639.486	672.953	-122.47	363.782	701.491	-106.434	373.509	712.156	-31.906	278.69	718.975	-53.9583	177.162	688.113	-36.8571	666.274	674.753	394.906	398.526	699.955	425.15	390.279	709.712	351.833	295.975	720.108	385.082	200.313	690.963	376.396
545	5.44	501.839	1238.03	149.43	546.016	1236.94	76.8734	553.294	1233.27	214.395	627.102	1040.42	-18.6145	637.345	1049.95	295.656	564.464	1013.75	152.014	639.527	672.976	-122.515	363.803	701.451	-106.451	373.5	712.148	-31.898	278.736	718.949	-53.972	177.159	688.075	-36.8705	666.284	674.781	394.915	398.511	699.941	425.148	390.106	709.761	351.843	295.998	720.09	385.091	200.83	690.586	376.374
546	5.45	501.802	1237.99	149.407	545.925	1236.91	76.8766	553.235	1233.28	214.388	627.085	1040.44	-18.6307	637.272	1049.96	295.642	564.423	1013.75	152.033	639.545	673.012	-122.547	363.804	701.42	-106.454	373.502	712.131	-31.8826	278.718	718.934	-53.9479	177.109	688.072	-36.8323	666.277	674.811	394.931	398.532	699.947	425.158	390.121	709.75	351.859	295.966	720.092	385.114	200.506	690.791	376.39
547	5.46	501.719	1237.97	149.362	545.824	1236.91	76.8398	553.148	1233.29	214.356	627.052	1040.48	-18.6361	637.198	1049.99	295.623	564.328	1013.78	151.999	639.534	673.027	-122.549	363.768	701.425	-106.451	373.516	712.125	-31.8931	278.682	718.933	-53.9607	177.095	688.091	-36.8055	666.269	674.849	394.97	398.516	699.953	425.158	390.189	709.733	351.836	295.935	720.071	385.103	201.265	690.22	376.35
548	5.47	501.724	1237.97	149.272	545.772	1236.92	76.7836	553.069	1233.31	214.307	627.053	1040.51	-18.6582	637.132	1050.02	295.588	564.235	1013.85	151.927	639.532	673.049	-122.552	363.747	701.45	-106.468	373.538	712.15	-31.9486	278.68	718.938	-53.9944	177.107	688.116	-36.8644	666.241	674.874	394.99	398.522	699.979	425.152	390.117	709.784	351.806	295.939	720.077	385.061	201.466	690.081	376.32
549	5.48	501.607	1238	149.24	545.687	1236.95	76.757	553.033	1233.32	214.292	627.058	1040.54	-18.6534	637.096	1050.07	295.572	564.161	1013.92	151.908	639.549	673.077	-122.568	363.759	701.475	-106.488	373.517	712.179	-31.9518	278.669	718.966	-53.9876	177.144	688.115	-36.8897	666.278	674.923	395.02	398.542	700.01	425.155	390.019	709.833	351.821	295.941	720.096	385.037	201.508	690.061	376.302
550	5.49	501.439	1238.05	149.261	545.584	1236.97	76.7338	552.944	1233.33	214.28	627.02	1040.58	-18.66	637.043	1050.11	295.567	564.031	1014	151.912	639.576	673.121	-122.595	363.73	701.516	-106.488	373.521	712.21	-31.9416	278.633	718.998	-53.9512	177.073	688.154	-36.8503	666.331	674.985	395.032	398.556	700.03	425.152	389.879	709.899	351.834	295.921	720.118	385.063	201.502	690.079	376.314
551	5.5	501.309	1238.07	149.261	545.509	1236.98	76.6935	552.87	1233.32	214.259	626.982	1040.6	-18.6968	636.928	1050.17	295.546	563.906	1014.06	151.894	639.588	673.16	-122.65	363.699	701.539	-106.499	373.49	712.239	-31.9594	278.602	719.024	-53.9453	177.014	688.191	-36.8409	666.304	675.026	395.027	398.563	700.043	425.145	389.901	709.91	351.841	295.925	720.123	385.061	201.488	690.105	376.325
552	5.51	501.209	1238.07	149.264	545.426	1236.97	76.6497	552.806	1233.3	214.227	626.91	1040.62	-18.7422	636.832	1050.19	295.515	563.84	1014.11	151.845	639.577	673.185	-122.682	363.709	701.529	-106.521	373.463	712.248	-31.98	278.617	719.021	-53.9768	177.057	688.175	-36.851	666.258	675.044	395.051	398.523	700.044	425.136	389.993	709.878	351.817	295.937	720.147	385.028	201.459	690.119	376.328
553	5.52	501.173	1238.02	149.244	545.353	1236.95	76.6455	552.759	1233.28	214.219	626.836	1040.62	-18.7466	636.769	1050.2	295.504	563.808	1014.11	151.815	639.578	673.202	-122.694	363.699	701.512	-106.515	373.493	712.24	-31.9878	278.647	719.009	-53.9839	177.057	688.167	-36.8595	666.266	675.07	395.081	398.489	700.046	425.129	390.053	709.864	351.819	295.928	720.135	385.038	201.47	690.111	376.323
554	5.53	501.127	1237.96	149.249	545.273	1236.91	76.6695	552.713	1233.27	214.211	626.801	1040.63	-18.7355	636.704	1050.21	295.497	563.771	1014.08	151.834	639.614	673.251	-122.72	363.697	701.496	-106.496	373.486	712.227	-31.9578	278.648	719	-53.9764	177.047	688.165	-36.8332	666.29	675.098	395.089	398.488	700.047	425.148	390.084	709.864	351.843	295.959	720.109	385.069	201.054	690.383	376.337
555	5.54	501.095	1237.86	149.255	545.193	1236.89	76.6647	552.678	1233.24	214.217	626.738	1040.63	-18.7347	636.627	1050.22	295.483	563.714	1014.08	151.822	639.6	673.281	-122.746	363.695	701.468	-106.482	373.466	712.21	-31.9397	278.663	718.985	-53.9752	177.052	688.161	-36.8177	666.295	675.122	395.093	398.46	700.032	425.139	390.127	709.809	351.837	295.964	720.098	385.074	200.065	691.059	376.378
556	5.55	501.062	1237.81	149.235	545.123	1236.87	76.6323	552.61	1233.22	214.196	626.655	1040.63	-18.7466	636.532	1050.21	295.455	563.68	1014.06	151.793	639.603	673.292	-122.772	363.693	701.449	-106.505	373.465	712.197	-31.9516	278.656	718.96	-53.985	177.043	688.126	-36.8094	666.269	675.15	395.121	398.486	700.001	425.161	390.105	709.778	351.805	295.91	720.083	385.071	200.269	690.897	376.373
557	5.56	501.073	1237.74	149.217	545.051	1236.85	76.619	552.55	1233.18	214.179	626.586	1040.62	-18.758	636.446	1050.21	295.425	563.674	1014.04	151.754	639.609	673.309	-122.809	363.711	701.435	-106.526	373.457	712.181	-31.9502	278.705	718.923	-54.0067	177.124	688.068	-36.8555	666.259	675.173	395.143	398.494	699.976	425.163	390.088	709.765	351.82	295.932	720.067	385.053	201.205	690.225	376.341
558	5.57	501.02	1237.7	149.219	544.989	1236.85	76.6039	552.52	1233.16	214.185	626.529	1040.63	-18.7692	636.389	1050.23	295.41	563.644	1014.05	151.738	639.604	673.34	-122.838	363.703	701.432	-106.53	373.505	712.181	-31.9776	278.743	718.922	-54.0091	177.168	688.06	-36.8823	666.285	675.192	395.167	398.512	699.968	425.159	390.177	709.755	351.829	295.988	720.059	385.059	201.018	690.371	376.362
559	5.58	500.845	1237.74	149.259	544.903	1236.86	76.5818	552.447	1233.13	214.185	626.435	1040.62	-18.7825	636.284	1050.27	295.406	563.45	1014.12	151.735	639.581	673.361	-122.889	363.675	701.443	-106.529	373.491	712.197	-31.9908	278.695	718.953	-53.9803	177.149	688.083	-36.8648	666.257	675.174	395.185	398.527	699.982	425.166	390.114	709.786	351.846	295.961	720.091	385.065	200.506	690.729	376.391
560	5.59	500.582	1237.82	149.278	544.806	1236.86	76.5474	552.359	1233.13	214.165	626.334	1040.65	-18.7888	636.152	1050.29	295.396	563.234	1014.2	151.755	639.557	673.398	-122.966	363.653	701.46	-106.53	373.437	712.224	-31.99	278.617	718.983	-53.9619	177.078	688.104	-36.8299	666.215	675.182	395.189	398.514	699.995	425.155	390.044	709.826	351.84	295.915	720.108	385.07	200.771	690.534	376.366
561	5.6	500.378	1237.88	149.292	544.721	1236.85	76.524	552.322	1233.14	214.145	626.265	1040.68	-18.81	636.056	1050.33	295.381	563.182	1014.24	151.718	639.565	673.445	-123.019	363.656	701.471	-106.544	373.466	712.25	-32.0187	278.609	719.005	-53.9612	177.012	688.133	-36.8117	666.196	675.219	395.202	398.487	700.018	425.152	390.064	709.869	351.837	295.906	720.118	385.066	199.956	691.12	376.401
562	5.61	500.282	1237.92	149.315	544.643	1236.86	76.5171	552.224	1233.18	214.151	626.209	1040.74	-18.8283	635.967	1050.37	295.357	563.079	1014.27	151.689	639.582	673.492	-123.048	363.641	701.49	-106.566	373.514	712.258	-32.0369	278.637	719.016	-53.9665	176.999	688.156	-36.8161	666.264	675.304	395.211	398.501	700.048	425.159	390.004	709.893	351.841	295.859	720.155	385.062	200.221	690.964	376.397
563	5.62	500.161	1237.9	149.31	544.539	1236.87	76.4972	552.112	1233.19	214.175	626.132	1040.78	-18.849	635.841	1050.39	295.331	562.903	1014.31	151.662	639.568	673.517	-123.094	363.614	701.499	-106.565	373.488	712.265	-32.0382	278.619	719.023	-53.964	176.991	688.167	-36.8265	666.235	675.328	395.231	398.483	700.075	425.148	389.929	709.924	351.851	295.79	720.178	385.063	201.123	690.312	376.35
564	5.63	500.084	1237.82	149.295	544.445	1236.86	76.4765	551.992	1233.18	214.17	626.043	1040.81	-18.8437	635.749	1050.39	295.287	562.767	1014.33	151.63	639.56	673.55	-123.143	363.638	701.486	-106.585	373.472	712.277	-32.0722	278.634	718.991	-53.9973	177.012	688.154	-36.857	666.188	675.337	395.253	398.455	700.093	425.144	389.921	709.929	351.841	295.768	720.169	385.053	201.343	690.134	376.319
565	5.64	500.079	1237.71	149.29	544.406	1236.84	76.454	551.939	1233.17	214.175	625.936	1040.82	-18.8427	635.692	1050.38	295.238	562.739	1014.29	151.588	639.587	673.609	-123.184	363.657	701.453	-106.607	373.514	712.252	-32.1004	278.688	718.959	-54.0291	177.116	688.099	-36.915	666.178	675.364	395.277	398.459	700.097	425.154	389.964	709.922	351.855	295.859	720.132	385.04	201.432	690.071	376.306
566	5.65	500.044	1237.65	149.296	544.313	1236.81	76.4478	551.83	1233.16	214.172	625.837	1040.81	-18.8515	635.618	1050.37	295.208	562.678	1014.26	151.583	639.595	673.64	-123.259	363.672	701.434	-106.617	373.534	712.216	-32.0922	278.687	718.946	-54.0239	177.141	688.059	-36.9062	666.187	675.397	395.261	398.463	700.092	425.162	390.112	709.852	351.861	295.895	720.091	385.048	201.444	690.044	376.317
567	5.66	499.865	1237.64	149.328	544.158	1236.79	76.4566	551.726	1233.12	214.177	625.692	1040.79	-18.861	635.474	1050.39	295.213	562.485	1014.28	151.616	639.549	673.642	-123.326	363.632	701.427	-106.622	373.476	712.21	-32.0536	278.642	718.955	-54.0036	177.09	688.058	-36.8639	666.205	675.439	395.282	398.439	700.061	425.162	390.14	709.799	351.86	295.872	720.073	385.054	201.413	690.029	376.319
568	5.67	499.688	1237.62	149.369	544.047	1236.76	76.4484	551.644	1233.07	214.181	625.536	1040.76	-18.874	635.373	1050.41	295.225	562.324	1014.29	151.631	639.563	673.675	-123.368	363.579	701.422	-106.596	373.465	712.221	-32.0539	278.624	718.967	-53.9876	177.065	688.059	-36.8294	666.232	675.483	395.299	398.411	700.042	425.172	390.051	709.806	351.844	295.843	720.082	385.071	201.413	690.023	376.325
569	5.68	499.533	1237.64	149.411	543.946	1236.75	76.4677	551.645	1233.03	214.181	625.439	1040.75	-18.8856	635.312	1050.44	295.227	562.25	1014.29	151.642	639.598	673.711	-123.41	363.586	701.419	-106.592	373.482	712.224	-32.0576	278.64	718.973	-53.9727	177.07	688.061	-36.8004	666.26	675.514	395.295	398.419	700.021	425.183	390.129	709.769	351.849	295.881	720.073	385.075	201.441	690.017	376.334
570	5.69	499.463	1237.66	149.414	543.824	1236.76	76.4732	551.746	1232.99	214.159	625.365	1040.78	-18.9041	635.217	1050.47	295.234	562.149	1014.32	151.646	639.585	673.727	-123.466	363.562	701.431	-106.581	373.465	712.251	-32.0483	278.641	718.976	-53.9559	177.034	688.094	-36.7645	666.238	675.52	395.32	398.434	700.016	425.183	390.059	709.794	351.872	295.887	720.054	385.103	201.451	690.019	376.355
571	5.7	499.292	1237.68	149.41	543.659	1236.78	76.449	551.684	1233.01	214.161	625.245	1040.8	-18.9373	635.095	1050.5	295.221	561.984	1014.39	151.641	639.576	673.763	-123.525	363.517	701.448	-106.589	373.43	712.272	-32.0571	278.61	719.002	-53.9602	176.962	688.137	-36.7462	666.225	675.544	395.327	398.474	700.031	425.168	389.963	709.859	351.867	295.922	720.057	385.097	201.46	690.023	376.352
572	5.71	499.106	1237.71	149.381	543.538	1236.79	76.4064	551.769	1232.97	214.113	625.133	1040.82	-18.9549	634.998	1050.52	295.191	561.893	1014.44	151.582	639.59	673.814	-123.567	363.539	701.455	-106.646	373.469	712.282	-32.1023	278.588	719.03	-53.9947	176.975	688.144	-36.7752	666.235	675.559	395.339	398.492	700.05	425.148	389.891	709.895	351.837	295.905	720.09	385.058	201.469	690.036	376.32
573	5.72	498.954	1237.69	149.376	543.423	1236.81	76.3769	551.687	1232.97	214.091	625.014	1040.84	-18.9699	634.913	1050.54	295.168	561.76	1014.5	151.515	639.579	673.828	-123.601	363.552	701.471	-106.681	373.473	712.308	-32.1265	278.584	719.037	-54.0055	176.986	688.14	-36.7913	666.237	675.573	395.359	398.483	700.08	425.14	389.875	709.932	351.832	295.875	720.117	385.044	201.455	690.033	376.309
574	5.73	498.757	1237.68	149.415	543.278	1236.8	76.3804	551.635	1232.99	214.1	624.937	1040.9	-19.0005	634.823	1050.56	295.157	561.643	1014.54	151.499	639.53	673.859	-123.66	363.513	701.48	-106.688	373.434	712.321	-32.1293	278.577	719.032	-53.9975	176.958	688.13	-36.7867	666.239	675.604	395.369	398.49	700.109	425.145	389.827	709.996	351.848	295.829	720.129	385.046	201.41	690.035	376.312
575	5.74	498.598	1237.63	149.421	543.134	1236.78	76.3876	551.558	1232.98	214.098	624.848	1040.92	-19.017	634.734	1050.58	295.128	561.584	1014.57	151.464	639.493	673.886	-123.699	363.505	701.489	-106.692	373.423	712.325	-32.1504	278.556	719.024	-54.0002	176.947	688.113	-36.8047	666.187	675.625	395.391	398.478	700.115	425.144	389.84	709.989	351.848	295.781	720.133	385.049	201.389	690.031	376.306
576	5.75	498.541	1237.55	149.416	543.057	1236.74	76.3761	551.49	1232.95	214.086	624.762	1040.93	-19.0367	634.665	1050.58	295.107	561.484	1014.6	151.454	639.454	673.915	-123.74	363.518	701.489	-106.695	373.418	712.31	-32.1579	278.577	719.008	-54.0271	176.986	688.088	-36.8229	666.181	675.68	395.421	398.443	700.105	425.154	389.818	709.961	351.839	295.788	720.122	385.042	201.386	690.02	376.289
577	5.76	498.431	1237.49	149.452	542.953	1236.69	76.3943	551.432	1232.92	214.129	624.699	1040.95	-19.0497	634.617	1050.57	295.11	561.424	1014.59	151.458	639.423	673.967	-123.776	363.515	701.455	-106.701	373.433	712.285	-32.1607	278.599	718.989	-54.0198	176.998	688.058	-36.8086	666.185	675.721	395.45	398.412	700.089	425.171	389.934	709.889	351.831	295.769	720.11	385.061	201.369	690.015	376.3
578	5.77	498.35	1237.45	149.508	542.847	1236.66	76.447	551.342	1232.88	214.121	624.605	1040.98	-19.051	634.556	1050.56	295.119	561.426	1014.58	151.469	639.405	674.005	-123.81	363.515	701.431	-106.668	373.457	712.274	-32.1407	278.587	718.988	-53.9771	176.984	688.047	-36.7752	666.152	675.732	395.503	398.415	700.086	425.185	390.019	709.855	351.838	295.782	720.091	385.085	201.346	690.01	376.332
579	5.78	498.297	1237.4	149.525	542.764	1236.64	76.4706	551.253	1232.84	214.136	624.561	1041.01	-19.0541	634.494	1050.57	295.119	561.414	1014.57	151.47	639.369	674.015	-123.843	363.499	701.427	-106.665	373.445	712.287	-32.1196	278.593	718.999	-53.9668	176.974	688.045	-36.7478	666.121	675.739	395.532	398.405	700.088	425.194	390.075	709.832	351.896	295.798	720.079	385.112	201.369	690.007	376.35
580	5.79	498.159	1237.37	149.514	542.713	1236.63	76.4612	551.193	1232.81	214.127	624.516	1041.02	-19.0752	634.473	1050.58	295.098	561.355	1014.6	151.445	639.344	674.023	-123.88	363.513	701.413	-106.682	373.472	712.288	-32.1394	278.596	718.997	-53.9777	177.007	688.037	-36.7673	666.116	675.775	395.574	398.398	700.108	425.185	390.043	709.843	351.892	295.829	720.093	385.113	201.394	690.006	376.338
581	5.8	497.972	1237.38	149.53	542.651	1236.61	76.4538	551.129	1232.78	214.131	624.458	1041.03	-19.1052	634.433	1050.59	295.092	561.253	1014.64	151.405	639.325	674.035	-123.927	363.475	701.424	-106.713	373.499	712.297	-32.1709	278.584	719.002	-53.9788	176.966	688.071	-36.7584	666.108	675.816	395.607	398.375	700.099	425.186	390.074	709.842	351.895	295.838	720.101	385.101	201.389	690.02	376.341
582	5.81	497.883	1237.34	149.525	542.547	1236.61	76.4531	551.042	1232.73	214.163	624.424	1041.04	-19.1179	634.386	1050.62	295.072	561.173	1014.68	151.391	639.281	674.056	-123.958	363.467	701.438	-106.722	373.461	712.314	-32.1627	278.573	719.02	-53.972	176.931	688.084	-36.7358	666.1	675.816	395.616	398.365	700.103	425.188	389.982	709.884	351.908	295.817	720.109	385.11	201.366	690.034	376.358
583	5.82	497.796	1237.3	149.524	542.429	1236.61	76.4724	550.962	1232.7	214.142	624.403	1041.06	-19.1421	634.348	1050.64	295.058	561.099	1014.7	151.359	639.275	674.086	-124.003	363.476	701.423	-106.719	373.476	712.32	-32.1831	278.571	719.024	-53.9656	176.949	688.079	-36.7547	666.091	675.85	395.617	398.372	700.122	425.187	389.979	709.877	351.874	295.805	720.115	385.116	201.361	690.039	376.345
584	5.83	497.662	1237.26	149.51	542.356	1236.6	76.4734	550.911	1232.7	214.112	624.37	1041.09	-19.1604	634.308	1050.64	295.041	561.049	1014.71	151.325	639.326	674.137	-124.036	363.474	701.415	-106.732	373.468	712.32	-32.1991	278.574	719.028	-53.9787	176.935	688.077	-36.7563	666.127	675.906	395.642	398.349	700.119	425.175	390.011	709.891	351.862	295.798	720.107	385.092	201.349	690.041	376.32
585	5.84	497.54	1237.25	149.52	542.299	1236.59	76.454	550.854	1232.67	214.119	624.306	1041.12	-19.2077	634.264	1050.65	295.01	560.966	1014.75	151.289	639.271	674.13	-124.085	363.452	701.419	-106.747	373.436	712.332	-32.2148	278.571	719.032	-54.004	176.947	688.095	-36.8079	666.129	675.901	395.639	398.368	700.114	425.169	389.905	709.921	351.839	295.797	720.117	385.055	201.346	690.03	376.307
586	5.85	497.479	1237.23	149.527	542.225	1236.6	76.4689	550.815	1232.68	214.132	624.244	1041.13	-19.2371	634.215	1050.66	294.993	560.952	1014.76	151.271	639.242	674.145	-124.147	363.45	701.427	-106.771	373.433	712.336	-32.2338	278.582	719.018	-54.0216	176.965	688.09	-36.8372	666.115	675.896	395.618	398.408	700.131	425.176	389.802	709.966	351.852	295.802	720.143	385.033	201.371	690.025	376.305
587	5.86	497.449	1237.21	149.525	542.17	1236.61	76.4873	550.778	1232.69	214.139	624.232	1041.16	-19.2527	634.178	1050.66	294.981	560.906	1014.8	151.259	639.27	674.205	-124.205	363.429	701.445	-106.761	373.402	712.341	-32.2123	278.551	719.031	-54.003	176.926	688.093	-36.8088	666.121	675.948	395.628	398.415	700.154	425.17	389.821	709.99	351.866	295.765	720.152	385.038	201.346	690.025	376.31
588	5.87	497.406	1237.2	149.528	542.083	1236.61	76.5007	550.723	1232.66	214.127	624.218	1041.17	-19.2672	634.157	1050.66	294.966	560.863	1014.82	151.214	639.297	674.233	-124.228	363.432	701.444	-106.776	373.414	712.352	-32.2212	278.558	719.032	-54.0125	176.929	688.084	-36.8122	666.126	675.951	395.624	398.375	700.164	425.152	389.951	709.942	351.845	295.777	720.142	385.023	200.89	690.354	376.323
589	5.88	497.377	1237.2	149.553	542.049	1236.6	76.4984	550.692	1232.65	214.128	624.166	1041.16	-19.2687	634.139	1050.66	294.954	560.829	1014.83	151.179	639.283	674.231	-124.227	363.431	701.428	-106.791	373.421	712.351	-32.2484	278.583	719.03	-54.0322	176.952	688.074	-36.8229	666.092	675.932	395.624	398.385	700.143	425.143	390.024	709.888	351.808	295.804	720.147	385.022	200.358	690.742	376.339
590	5.89	497.342	1237.2	149.586	542.025	1236.62	76.507	550.716	1232.62	214.134	624.133	1041.16	-19.2623	634.105	1050.67	294.971	560.823	1014.83	151.205	639.273	674.235	-124.265	363.426	701.428	-106.787	373.43	712.347	-32.2302	278.573	719.033	-54.0095	176.932	688.088	-36.7889	666.066	675.924	395.612	398.447	700.133	425.185	390.055	709.88	351.823	295.839	720.125	385.061	201.143	690.197	376.338
591	5.9	497.335	1237.2	149.612	541.963	1236.62	76.5435	550.703	1232.62	214.146	624.115	1041.14	-19.2731	634.069	1050.67	294.99	560.792	1014.85	151.242	639.285	674.239	-124.297	363.406	701.434	-106.765	373.425	712.335	-32.1932	278.535	719.048	-53.9505	176.904	688.088	-36.7296	666.111	675.95	395.584	398.445	700.108	425.201	390.08	709.849	351.858	295.824	720.114	385.097	201.337	690.06	376.358
592	5.91	497.306	1237.2	149.618	541.931	1236.61	76.5584	550.71	1232.62	214.154	624.065	1041.16	-19.2748	634.021	1050.67	295	560.765	1014.83	151.234	639.312	674.272	-124.318	363.398	701.426	-106.738	373.424	712.34	-32.1909	278.52	719.05	-53.9322	176.865	688.09	-36.686	666.159	675.962	395.587	398.374	700.074	425.17	390.097	709.808	351.853	295.797	720.113	385.102	201.382	690.006	376.352
593	5.92	497.324	1237.2	149.587	541.934	1236.61	76.5475	550.682	1232.62	214.153	623.963	1041.15	-19.2741	633.976	1050.67	295.002	560.744	1014.81	151.205	639.27	674.291	-124.341	363.432	701.433	-106.745	373.448	712.315	-32.2022	278.739	719.304	-54.0575	176.903	688.073	-36.7297	666.1	675.948	395.59	398.336	700.07	425.161	390.162	709.767	351.85	295.818	720.09	385.114	201.406	689.995	376.347
594	5.93	497.333	1237.18	149.585	541.925	1236.61	76.5302	550.607	1232.64	214.163	623.905	1041.16	-19.2799	633.907	1050.66	295.003	560.728	1014.81	151.189	639.204	674.293	-124.376	363.465	701.454	-106.776	373.472	712.296	-32.213	279.009	719.622	-54.1984	176.92	688.042	-36.7555	666.079	675.945	395.565	398.336	700.077	425.176	390.173	709.775	351.85	295.831	720.086	385.127	201.359	689.998	376.348
595	5.94	497.307	1237.22	149.596	541.893	1236.62	76.5249	550.556	1232.65	214.176	623.864	1041.2	-19.2871	633.849	1050.67	295.004	560.691	1014.84	151.177	639.19	674.325	-124.387	363.434	701.384	-106.797	373.476	712.301	-32.2398	278.701	719.148	-54.0534	176.941	688.027	-36.757	666.096	675.966	395.561	398.348	700.098	425.166	390.092	709.814	351.864	295.767	720.119	385.117	201.329	690.008	376.344
596	5.95	497.208	1237.26	149.563	541.869	1236.64	76.5011	550.513	1232.7	214.165	623.786	1041.23	-19.2947	633.785	1050.69	295.002	560.628	1014.88	151.145	639.223	674.374	-124.383	363.421	701.367	-106.812	373.478	712.326	-32.2734	278.602	719.049	-54.0133	176.989	688.021	-36.7839	666.085	675.991	395.564	398.347	700.137	425.166	389.893	709.887	351.874	295.73	720.132	385.088	201.33	690.02	376.318
597	5.96	497.205	1237.31	149.485	541.851	1236.69	76.4652	550.474	1232.74	214.165	623.762	1041.25	-19.3248	633.735	1050.71	294.996	560.554	1014.94	151.107	639.221	674.413	-124.384	363.4	701.383	-106.841	373.439	712.353	-32.2697	278.578	719.03	-54.0229	176.952	688.062	-36.8039	666.048	675.988	395.573	398.368	700.165	425.17	389.861	709.908	351.853	295.732	720.144	385.043	201.324	690.039	376.303
598	5.97	497.157	1237.38	149.457	541.831	1236.75	76.4391	550.486	1232.79	214.155	623.748	1041.27	-19.3341	633.686	1050.74	295.007	560.499	1015	151.087	639.198	674.41	-124.395	363.373	701.439	-106.853	373.437	712.372	-32.2882	278.551	719.05	-54.0295	176.899	688.114	-36.7912	666.016	675.972	395.578	398.366	700.187	425.165	389.887	709.932	351.83	295.746	720.156	385.041	201.295	690.07	376.311
599	5.98	497.155	1237.44	149.476	541.783	1236.81	76.4629	550.459	1232.8	214.141	623.691	1041.26	-19.3352	633.636	1050.76	295.023	560.437	1015.04	151.088	639.198	674.408	-124.4	363.349	701.465	-106.832	373.42	712.406	-32.2862	278.524	719.092	-54.0112	176.894	688.144	-36.7763	666.019	675.982	395.564	398.331	700.189	425.166	389.897	709.949	351.825	295.71	720.178	385.07	200.84	690.394	376.341
600	5.99	497.137	1237.47	149.524	541.799	1236.83	76.4896	550.499	1232.8	214.168	623.68	1041.26	-19.3365	633.599	1050.76	295.041	560.402	1015.07	151.076	639.213	674.408	-124.406	363.43	701.474	-106.797	373.448	712.419	-32.2815	278.604	719.093	-53.9418	176.873	688.133	-36.763	666.059	676.017	395.57	398.331	700.17	425.154	389.886	709.964	351.841	295.718	720.183	385.086	200.278	690.786	376.372
601	6	497.157	1237.49	149.526	541.823	1236.83	76.5111	550.529	1232.79	214.186	623.675	1041.26	-19.3146	633.579	1050.75	295.059	560.427	1015.04	151.099	639.201	674.4	-124.406	363.545	701.499	-106.768	373.469	712.387	-32.2518	278.784	719.031	-53.8309	176.821	688.122	-36.7026	666.045	676.004	395.56	398.368	700.146	425.168	389.945	709.924	351.858	295.741	720.158	385.105	201.062	690.211	376.355
602	6.01	497.212	1237.48	149.542	541.862	1236.84	76.519	550.499	1232.76	214.224	623.669	1041.23	-19.3151	633.564	1050.72	295.061	560.492	1014.99	151.122	639.164	674.377	-124.425	363.571	701.499	-106.77	373.425	712.36	-32.2223	278.822	718.982	-53.8259	176.842	688.081	-36.7083	666.053	675.988	395.579	398.384	700.103	425.175	389.989	709.888	351.867	295.776	720.112	385.119	201.283	690.043	376.362
603	6.02	497.273	1237.46	149.564	541.903	1236.85	76.5323	550.522	1232.77	214.228	623.668	1041.22	-19.3056	633.564	1050.69	295.064	560.519	1014.95	151.133	639.196	674.398	-124.418	363.546	701.495	-106.76	373.413	712.338	-32.2338	278.843	718.954	-53.8376	176.865	688.044	-36.7262	666.094	675.983	395.584	398.394	700.071	425.183	390.07	709.832	351.856	295.797	720.054	385.109	201.331	689.989	376.354
604	6.03	497.348	1237.45	149.577	541.92	1236.85	76.5312	550.568	1232.79	214.206	623.692	1041.24	-19.3061	633.554	1050.67	295.07	560.506	1014.95	151.138	639.244	674.42	-124.407	363.541	701.466	-106.743	373.424	712.324	-32.2448	278.848	718.937	-53.8408	176.855	688.024	-36.7116	666.152	676.006	395.575	398.388	700.067	425.184	390.122	709.79	351.854	295.753	720.054	385.114	200.917	690.27	376.355
605	6.04	497.368	1237.49	149.578	541.914	1236.86	76.5474	550.584	1232.79	214.218	623.696	1041.26	-19.2995	633.53	1050.68	295.081	560.503	1014.96	151.148	639.24	674.419	-124.399	363.485	701.445	-106.755	373.437	712.33	-32.2446	278.764	718.962	-53.8718	176.882	688.013	-36.73	666.098	675.995	395.58	398.381	700.071	425.203	390.17	709.776	351.869	295.732	720.085	385.13	200.385	690.657	376.377
606	6.05	497.362	1237.55	149.598	541.892	1236.91	76.5693	550.569	1232.82	214.261	623.64	1041.28	-19.2683	633.502	1050.71	295.096	560.498	1015	151.148	639.217	674.424	-124.393	363.406	701.412	-106.772	373.459	712.337	-32.2589	278.602	719.017	-53.9541	176.913	688.017	-36.7469	666.007	675.964	395.588	398.387	700.1	425.218	390.143	709.817	351.875	295.711	720.109	385.143	201.092	690.162	376.356
607	6.06	497.348	1237.63	149.617	541.877	1236.95	76.5835	550.563	1232.85	214.272	623.619	1041.28	-19.2722	633.482	1050.72	295.089	560.427	1015.05	151.11	639.212	674.422	-124.384	363.398	701.416	-106.804	373.439	712.351	-32.2584	278.549	719.056	-53.9905	176.904	688.036	-36.7465	666.029	675.996	395.585	398.379	700.115	425.185	389.964	709.9	351.891	295.706	720.139	385.114	201.237	690.062	376.346
608	6.07	497.271	1237.73	149.637	541.889	1237	76.5781	550.533	1232.86	214.262	623.657	1041.27	-19.2929	633.447	1050.73	295.085	560.367	1015.09	151.1	639.226	674.417	-124.352	363.394	701.422	-106.805	373.396	712.37	-32.2602	278.543	719.066	-54.0019	176.854	688.06	-36.721	666.036	675.994	395.58	398.353	700.121	425.144	389.818	709.954	351.862	295.708	720.168	385.082	201.271	690.051	376.318
609	6.08	497.312	1237.79	149.635	541.912	1237.03	76.5819	550.54	1232.87	214.309	623.641	1041.27	-19.3011	633.429	1050.74	295.101	560.355	1015.1	151.101	639.204	674.401	-124.319	363.407	701.444	-106.81	373.455	712.383	-32.2812	278.547	719.073	-54.017	176.82	688.089	-36.7347	666.013	675.96	395.575	398.365	700.149	425.146	389.785	709.98	351.85	295.724	720.168	385.088	201.278	690.048	376.314
610	6.09	497.349	1237.81	149.645	541.905	1237.04	76.6204	550.568	1232.88	214.374	623.587	1041.25	-19.2526	633.421	1050.73	295.129	560.37	1015.1	151.105	639.172	674.373	-124.286	363.419	701.452	-106.819	373.457	712.391	-32.2817	278.554	719.073	-54.0214	176.829	688.088	-36.7469	665.987	675.927	395.568	398.355	700.145	425.16	389.809	709.976	351.871	295.727	720.152	385.08	201.277	690.043	376.335
611	6.1	497.39	1237.81	149.672	541.937	1237.04	76.6554	550.587	1232.91	214.404	623.615	1041.26	-19.245	633.409	1050.73	295.147	560.38	1015.12	151.132	639.176	674.367	-124.253	363.417	701.437	-106.804	373.421	712.375	-32.2655	278.548	719.084	-54.0082	176.802	688.096	-36.7538	665.988	675.899	395.562	398.317	700.142	425.177	389.788	709.986	351.887	295.736	720.147	385.084	201.264	690.05	376.338
612	6.11	497.438	1237.83	149.712	541.969	1237.04	76.6894	550.631	1232.9	214.444	623.687	1041.25	-19.2489	633.415	1050.71	295.16	560.382	1015.11	151.166	639.179	674.368	-124.215	363.404	701.424	-106.809	373.422	712.354	-32.2396	278.536	719.075	-54.0127	176.826	688.085	-36.7448	666.029	675.888	395.556	398.31	700.144	425.194	389.77	709.968	351.888	295.756	720.135	385.107	201.257	690.025	376.326
613	6.12	497.49	1237.82	149.748	542.009	1237.04	76.7077	550.683	1232.9	214.449	623.736	1041.25	-19.2152	633.431	1050.68	295.186	560.43	1015.09	151.189	639.182	674.359	-124.18	363.395	701.424	-106.8	373.446	712.345	-32.2433	278.584	719.045	-54.028	176.889	688.051	-36.7698	666.052	675.869	395.564	398.346	700.135	425.197	389.958	709.918	351.872	295.751	720.093	385.107	201.287	690.005	376.322
614	6.13	497.569	1237.78	149.773	542.03	1237.04	76.7388	550.705	1232.91	214.476	623.754	1041.24	-19.1711	633.459	1050.64	295.216	560.48	1015.06	151.203	639.191	674.342	-124.163	363.474	701.427	-106.796	373.41	712.323	-32.2244	278.665	719.024	-53.9893	176.904	688.018	-36.7858	666.052	675.849	395.583	398.33	700.117	425.2	390.047	709.88	351.885	295.722	720.1	385.099	201.294	689.999	376.33
615	6.14	497.6	1237.78	149.805	542.06	1237.04	76.7907	550.738	1232.91	214.499	623.762	1041.22	-19.1598	633.47	1050.62	295.244	560.503	1015.06	151.225	639.247	674.356	-124.138	363.594	701.477	-106.772	373.376	712.322	-32.2026	278.772	718.99	-53.8677	176.871	688.017	-36.7765	666.069	675.813	395.565	398.293	700.088	425.185	390.074	709.835	351.867	295.675	720.125	385.113	201.29	689.993	376.343
616	6.15	497.591	1237.83	149.845	542.095	1237.05	76.8405	550.726	1232.92	214.545	623.779	1041.23	-19.1145	633.491	1050.59	295.277	560.534	1015.04	151.269	639.274	674.369	-124.075	363.6	701.506	-106.714	373.402	712.327	-32.1878	278.895	719.278	-53.9507	176.853	688.058	-36.7371	666.06	675.761	395.545	398.272	700.073	425.181	390.029	709.807	351.864	295.695	720.124	385.141	201.29	689.991	376.353
617	6.16	497.669	1237.87	149.884	542.127	1237.07	76.891	550.713	1232.95	214.567	623.781	1041.24	-19.067	633.542	1050.58	295.32	560.548	1015.03	151.318	639.258	674.372	-124.027	363.547	701.492	-106.698	373.431	712.324	-32.1763	279	719.652	-54.1403	176.883	688.053	-36.7363	666.064	675.739	395.547	398.314	700.054	425.192	389.96	709.822	351.861	295.725	720.133	385.172	200.863	690.31	376.38
618	6.17	497.736	1237.88	149.898	542.146	1237.07	76.9301	550.761	1232.96	214.593	623.817	1041.25	-19.0173	633.585	1050.56	295.33	560.569	1015.03	151.333	639.245	674.35	-124.009	363.443	701.428	-106.696	373.408	712.348	-32.1754	278.678	719.207	-54.0181	176.879	688.055	-36.7673	666.052	675.701	395.525	398.346	700.031	425.196	389.922	709.859	351.875	295.725	720.127	385.147	199.88	691.032	376.417
619	6.18	497.733	1237.92	149.9	542.174	1237.11	76.9506	550.798	1232.96	214.629	623.849	1041.24	-18.9907	633.618	1050.54	295.34	560.567	1015.04	151.346	639.258	674.348	-124.005	363.421	701.445	-106.695	373.398	712.358	-32.187	278.581	719.091	-53.9836	176.859	688.056	-36.7754	666.052	675.631	395.483	398.35	700.04	425.191	389.805	709.911	351.89	295.703	720.142	385.138	199.626	691.22	376.41
620	6.19	497.68	1237.99	149.918	542.209	1237.13	76.9819	550.787	1232.99	214.668	623.899	1041.23	-19.0035	633.634	1050.51	295.345	560.558	1015.06	151.353	639.28	674.356	-123.977	363.399	701.468	-106.697	373.386	712.365	-32.1909	278.56	719.064	-53.991	176.834	688.074	-36.7835	666.073	675.578	395.449	398.357	700.052	425.184	389.779	709.933	351.88	295.68	720.174	385.132	199.968	690.945	376.388
621	6.2	497.758	1238	149.948	542.269	1237.14	76.991	550.847	1233	214.707	623.947	1041.25	-18.9759	633.673	1050.48	295.35	560.606	1015.05	151.364	639.319	674.372	-123.953	363.419	701.473	-106.712	373.408	712.358	-32.1909	278.562	719.062	-54.0141	176.858	688.095	-36.8141	666.07	675.525	395.439	398.343	700.052	425.17	389.846	709.936	351.858	295.734	720.167	385.092	200.967	690.239	376.348
622	6.21	497.865	1238.01	149.95	542.357	1237.15	76.996	550.86	1233.01	214.73	624.004	1041.26	-18.9229	633.717	1050.45	295.363	560.662	1015.05	151.386	639.337	674.376	-123.931	363.448	701.464	-106.725	373.413	712.345	-32.2087	278.578	719.057	-54.0333	176.944	688.077	-36.8521	666.054	675.455	395.414	398.344	700.057	425.167	389.791	709.979	351.86	295.782	720.131	385.076	201.241	690.075	376.326
623	6.22	497.874	1238.03	149.976	542.424	1237.18	77.034	550.885	1233.03	214.747	624.043	1041.26	-18.8956	633.751	1050.43	295.4	560.686	1015.05	151.426	639.361	674.365	-123.912	363.472	701.453	-106.732	373.391	712.35	-32.194	278.608	719.036	-54.0386	176.974	688.048	-36.868	666.086	675.424	395.389	398.384	700.048	425.161	389.742	709.993	351.846	295.787	720.127	385.094	201.322	690.029	376.324
624	6.23	497.891	1238.1	150.017	542.441	1237.22	77.1024	550.929	1233.06	214.801	624.064	1041.25	-18.8634	633.776	1050.4	295.437	560.733	1015.02	151.473	639.342	674.37	-123.893	363.447	701.471	-106.709	373.409	712.367	-32.1696	278.577	719.053	-53.9992	176.906	688.055	-36.8023	666.115	675.386	395.337	398.37	700.04	425.169	389.847	709.946	351.859	295.776	720.135	385.105	201.334	690.016	376.347
625	6.24	497.996	1238.15	150.068	542.487	1237.23	77.1621	550.999	1233.07	214.821	624.097	1041.24	-18.8349	633.786	1050.37	295.481	560.808	1014.98	151.511	639.347	674.383	-123.893	363.452	701.458	-106.711	373.442	712.349	-32.1626	278.561	719.066	-53.9631	176.866	688.06	-36.7701	666.071	675.324	395.3	398.343	700.018	425.182	390.045	709.859	351.851	295.805	720.133	385.117	201.325	690.031	376.355
626	6.25	498.075	1238.2	150.123	542.552	1237.24	77.2083	551.032	1233.09	214.865	624.119	1041.23	-18.777	633.811	1050.33	295.503	560.891	1014.94	151.541	639.314	674.38	-123.873	363.475	701.445	-106.699	373.452	712.317	-32.1559	278.576	719.056	-53.9776	176.874	688.082	-36.7614	666.046	675.271	395.293	398.353	700.005	425.193	390.066	709.802	351.843	295.789	720.136	385.131	201.341	690.041	376.368
627	6.26	498.145	1238.23	150.193	542.618	1237.26	77.2866	551.089	1233.1	214.937	624.17	1041.24	-18.7298	633.84	1050.31	295.525	560.979	1014.89	151.59	639.319	674.416	-123.856	363.453	701.452	-106.677	373.432	712.295	-32.1233	278.565	719.049	-53.9582	176.897	688.074	-36.7402	666.071	675.251	395.265	398.338	699.998	425.201	389.912	709.832	351.86	295.806	720.139	385.162	201.337	690.042	376.389
628	6.27	498.206	1238.27	150.253	542.667	1237.28	77.3647	551.169	1233.13	214.971	624.23	1041.25	-18.6789	633.861	1050.27	295.559	561.011	1014.88	151.671	639.353	674.438	-123.849	363.479	701.433	-106.657	373.427	712.285	-32.0838	278.574	719.04	-53.9385	176.897	688.056	-36.7362	666.105	675.241	395.246	398.34	699.996	425.206	389.906	709.862	351.904	295.783	720.134	385.174	201.315	690.035	376.391
629	6.28	498.245	1238.32	150.295	542.753	1237.31	77.4033	551.163	1233.16	214.998	624.217	1041.25	-18.6495	633.889	1050.23	295.575	560.998	1014.87	151.696	639.329	674.425	-123.838	363.499	701.433	-106.665	373.454	712.298	-32.1074	278.598	719.036	-53.9543	176.95	688.022	-36.798	666.091	675.173	395.229	398.391	699.998	425.206	389.918	709.883	351.894	295.716	720.127	385.168	201.314	690.019	376.376
630	6.29	498.289	1238.35	150.294	542.853	1237.34	77.4039	551.145	1233.2	215.046	624.196	1041.24	-18.6179	633.914	1050.21	295.585	560.971	1014.88	151.696	639.297	674.404	-123.84	363.503	701.421	-106.703	373.463	712.311	-32.1668	278.63	719.019	-53.9992	176.99	688.007	-36.8551	666.08	675.115	395.225	398.35	700	425.187	389.988	709.862	351.868	295.723	720.137	385.114	201.321	690.01	376.355
631	6.3	498.291	1238.43	150.335	542.899	1237.39	77.4351	551.23	1233.23	215.093	624.188	1041.23	-18.5996	633.936	1050.18	295.598	560.945	1014.88	151.713	639.309	674.399	-123.853	363.498	701.432	-106.699	373.453	712.304	-32.1609	278.621	719.024	-54.0092	176.952	688.006	-36.8419	666.091	675.078	395.205	398.324	700.008	425.173	389.993	709.879	351.875	295.732	720.153	385.103	200.86	690.33	376.37
632	6.31	498.236	1238.57	150.421	542.919	1237.46	77.5228	551.318	1233.25	215.118	624.185	1041.21	-18.5571	633.948	1050.16	295.633	560.972	1014.85	151.766	639.336	674.392	-123.835	363.485	701.457	-106.679	373.408	712.307	-32.1224	278.579	719.044	-53.9766	176.948	688.019	-36.8271	666.121	675.042	395.195	398.341	700.002	425.163	389.844	709.928	351.87	295.683	720.186	385.133	200.311	690.72	376.401
633	6.32	498.212	1238.66	150.476	542.952	1237.51	77.598	551.391	1233.28	215.154	624.175	1041.21	-18.512	633.958	1050.14	295.67	560.994	1014.82	151.809	639.312	674.373	-123.833	363.461	701.472	-106.684	373.395	712.323	-32.1278	278.557	719.051	-53.9782	176.902	688.063	-36.8084	666.131	675.007	395.188	398.344	699.973	425.162	389.738	709.942	351.888	295.727	720.173	385.134	201.085	690.196	376.373
634	6.33	498.258	1238.72	150.53	543.025	1237.55	77.6365	551.452	1233.32	215.206	624.127	1041.21	-18.4483	633.949	1050.1	295.71	561.028	1014.79	151.845	639.314	674.373	-123.823	363.474	701.474	-106.676	373.388	712.315	-32.1314	278.58	719.042	-53.9857	176.882	688.053	-36.8091	666.116	674.956	395.168	398.349	699.951	425.174	389.746	709.943	351.911	295.729	720.179	385.146	201.272	690.072	376.357
635	6.34	498.294	1238.8	150.601	543.075	1237.58	77.6739	551.484	1233.35	215.262	624.146	1041.21	-18.3978	633.961	1050.07	295.757	561.12	1014.75	151.877	639.342	674.4	-123.8	363.466	701.472	-106.657	373.41	712.311	-32.1294	278.597	719.036	-53.9785	176.915	688.037	-36.8356	666.095	674.913	395.149	398.352	699.963	425.186	389.817	709.926	351.911	295.745	720.15	385.144	201.303	690.032	376.347
636	6.35	498.361	1238.86	150.656	543.114	1237.59	77.7235	551.484	1233.38	215.338	624.13	1041.22	-18.3538	633.989	1050.04	295.796	561.191	1014.7	151.914	639.36	674.42	-123.781	363.47	701.489	-106.658	373.429	712.31	-32.1081	278.592	719.046	-53.9731	176.939	688.047	-36.8154	666.098	674.873	395.141	398.368	699.962	425.182	389.917	709.884	351.873	295.752	720.132	385.146	201.34	690.032	376.36
637	6.36	498.381	1238.9	150.712	543.14	1237.63	77.7881	551.493	1233.4	215.383	624.148	1041.23	-18.3143	634.015	1049.99	295.838	561.226	1014.69	151.958	639.367	674.434	-123.742	363.499	701.491	-106.653	373.407	712.311	-32.0809	278.57	719.06	-53.9591	176.915	688.065	-36.7863	666.07	674.795	395.157	398.418	699.946	425.197	389.882	709.897	351.884	295.773	720.121	385.16	201.339	690.045	376.376
638	6.37	498.402	1238.95	150.76	543.19	1237.65	77.8546	551.562	1233.4	215.395	624.182	1041.27	-18.2773	634.051	1049.96	295.878	561.24	1014.67	152.009	639.387	674.447	-123.694	363.529	701.484	-106.636	373.368	712.299	-32.049	278.555	719.066	-53.9467	176.875	688.08	-36.7649	666.063	674.738	395.147	398.431	699.935	425.205	389.814	709.921	351.908	295.785	720.134	385.174	201.328	690.049	376.383
639	6.38	498.429	1238.98	150.789	543.217	1237.67	77.9125	551.573	1233.4	215.426	624.216	1041.27	-18.2373	634.104	1049.92	295.908	561.291	1014.66	152.034	639.425	674.466	-123.687	363.51	701.487	-106.623	373.361	712.301	-32.0354	278.573	719.061	-53.9437	176.891	688.067	-36.7821	666.078	674.708	395.115	398.449	699.936	425.205	389.867	709.906	351.893	295.778	720.144	385.171	201.334	690.035	376.387
640	6.39	498.44	1238.99	150.804	543.245	1237.68	77.9434	551.572	1233.42	215.452	624.213	1041.25	-18.2021	634.142	1049.9	295.924	561.306	1014.66	152.064	639.415	674.461	-123.677	363.504	701.498	-106.621	373.373	712.294	-32.0335	278.597	719.066	-53.9499	176.89	688.078	-36.7783	666.073	674.656	395.085	398.406	699.938	425.204	389.924	709.877	351.862	295.77	720.148	385.169	201.327	690.037	376.384
641	6.4	498.469	1238.97	150.849	543.269	1237.67	77.9742	551.564	1233.42	215.489	624.244	1041.24	-18.1739	634.173	1049.85	295.946	561.352	1014.63	152.094	639.438	674.474	-123.66	363.56	701.526	-106.621	373.383	712.295	-32.0369	278.639	719.034	-53.9133	176.874	688.053	-36.7729	666.06	674.595	395.088	398.367	699.922	425.192	389.948	709.851	351.85	295.747	720.139	385.167	201.319	690.034	376.379
642	6.41	498.492	1238.96	150.889	543.311	1237.66	78.0037	551.596	1233.39	215.509	624.3	1041.25	-18.1547	634.213	1049.81	295.968	561.426	1014.61	152.11	639.43	674.481	-123.648	363.618	701.542	-106.614	373.391	712.285	-32.0284	278.695	719.012	-53.8545	176.888	688.023	-36.773	666.075	674.56	395.075	398.36	699.921	425.183	389.978	709.847	351.871	295.712	720.134	385.166	201.305	690.027	376.381
643	6.42	498.55	1238.95	150.897	543.353	1237.65	78.0336	551.651	1233.38	215.533	624.354	1041.27	-18.1074	634.278	1049.77	295.986	561.46	1014.6	152.13	639.431	674.462	-123.638	363.54	701.497	-106.611	373.369	712.267	-32.0151	278.611	719.04	-53.922	176.941	688.018	-36.8381	666.043	674.496	395.069	398.39	699.926	425.192	389.855	709.915	351.912	295.745	720.122	385.181	201.299	690.037	376.38
644	6.43	498.596	1238.96	150.914	543.408	1237.64	78.0681	551.625	1233.34	215.547	624.405	1041.26	-18.0955	634.349	1049.74	296.006	561.487	1014.59	152.16	639.444	674.444	-123.63	363.539	701.479	-106.616	373.371	712.255	-32.0361	278.622	719.03	-53.9588	176.927	688.038	-36.8588	666.012	674.435	395.052	398.435	699.925	425.182	389.825	709.915	351.919	295.759	720.133	385.157	201.297	690.047	376.374
645	6.44	498.617	1238.97	150.937	543.41	1237.64	78.1064	551.641	1233.31	215.551	624.454	1041.23	-18.0778	634.439	1049.72	296.023	561.502	1014.58	152.159	639.437	674.422	-123.616	363.55	701.482	-106.621	373.347	712.276	-32.0377	278.615	719.033	-53.9779	176.927	688.043	-36.8621	666.021	674.386	395.046	398.432	699.915	425.172	389.813	709.93	351.901	295.719	720.143	385.134	201.312	690.043	376.373
646	6.45	498.664	1238.96	150.941	543.46	1237.65	78.1313	551.633	1233.29	215.571	624.513	1041.22	-18.0667	634.515	1049.69	296.022	561.548	1014.56	152.167	639.466	674.407	-123.604	363.559	701.501	-106.636	373.352	712.291	-32.0461	278.604	719.041	-53.9807	176.935	688.04	-36.8725	666.051	674.351	395.011	398.429	699.915	425.164	389.804	709.936	351.882	295.749	720.144	385.133	201.319	690.037	376.368
647	6.46	498.682	1238.94	150.974	543.516	1237.63	78.168	551.662	1233.28	215.589	624.589	1041.21	-18.0448	634.623	1049.66	296.043	561.645	1014.53	152.202	639.498	674.381	-123.601	363.581	701.514	-106.646	373.426	712.281	-32.0549	278.625	719.057	-53.9827	176.949	688.045	-36.8503	666.055	674.302	394.983	398.433	699.912	425.171	389.975	709.872	351.881	295.784	720.142	385.14	201.366	690.037	376.358
648	6.47	498.729	1238.9	151.028	543.512	1237.61	78.2366	551.708	1233.26	215.615	624.641	1041.2	-18.0063	634.702	1049.62	296.081	561.711	1014.5	152.261	639.52	674.367	-123.587	363.587	701.517	-106.624	373.471	712.277	-32.0559	278.61	719.068	-53.9614	176.911	688.058	-36.8119	666.034	674.244	394.948	398.446	699.879	425.172	390.034	709.835	351.908	295.813	720.153	385.151	201.387	690.057	376.388
649	6.48	498.764	1238.86	151.103	543.515	1237.58	78.2931	551.717	1233.25	215.638	624.658	1041.17	-17.9762	634.756	1049.58	296.111	561.788	1014.46	152.314	639.512	674.336	-123.559	363.569	701.5	-106.599	373.459	712.269	-32.0339	278.592	719.061	-53.934	176.888	688.048	-36.8057	666.048	674.227	394.918	398.471	699.868	425.197	389.893	709.85	351.948	295.785	720.141	385.186	201.401	690.038	376.401
650	6.49	498.907	1238.8	151.124	543.583	1237.55	78.3201	551.761	1233.23	215.687	624.684	1041.15	-17.9273	634.862	1049.54	296.126	561.921	1014.4	152.335	639.544	674.329	-123.531	363.583	701.482	-106.584	373.471	712.233	-32.009	278.637	719.028	-53.9415	176.953	688.008	-36.8276	666.144	674.24	394.863	398.451	699.838	425.219	390.032	709.794	351.934	295.797	720.107	385.189	201.411	690.029	376.399
651	6.5	499	1238.77	151.164	543.681	1237.52	78.3157	551.756	1233.22	215.734	624.68	1041.13	-17.921	634.948	1049.51	296.145	562.001	1014.35	152.356	639.525	674.309	-123.501	363.589	701.462	-106.572	373.478	712.214	-31.9824	278.654	719.016	-53.9587	176.984	688.002	-36.8429	666.157	674.211	394.818	398.428	699.817	425.205	390.207	709.734	351.903	295.857	720.091	385.189	201.399	690.026	376.396
652	6.51	498.949	1238.78	151.204	543.658	1237.53	78.3559	551.792	1233.22	215.765	624.707	1041.12	-17.9171	634.997	1049.48	296.167	562.007	1014.34	152.378	639.525	674.299	-123.462	363.574	701.469	-106.564	373.435	712.226	-31.971	278.617	719.027	-53.9501	176.968	688.017	-36.8374	666.146	674.198	394.79	398.429	699.835	425.196	390.075	709.772	351.885	295.817	720.116	385.184	201.375	690.039	376.399
653	6.52	498.922	1238.8	151.207	543.648	1237.57	78.386	551.818	1233.22	215.759	624.733	1041.13	-17.9179	635.051	1049.46	296.183	561.953	1014.39	152.398	639.538	674.281	-123.396	363.559	701.502	-106.55	373.408	712.233	-31.9713	278.581	719.057	-53.9474	176.928	688.045	-36.8217	666.138	674.168	394.741	398.409	699.861	425.187	390.043	709.82	351.876	295.765	720.163	385.187	201.368	690.067	376.399
654	6.53	498.873	1238.87	151.233	543.663	1237.6	78.4011	551.853	1233.25	215.762	624.783	1041.15	-17.9015	635.136	1049.47	296.183	561.945	1014.42	152.397	639.542	674.259	-123.331	363.573	701.525	-106.543	373.391	712.258	-31.9718	278.59	719.069	-53.964	176.917	688.066	-36.8419	666.147	674.14	394.689	398.405	699.888	425.167	389.992	709.858	351.874	295.743	720.19	385.172	201.384	690.087	376.395
655	6.54	498.862	1238.91	151.27	543.679	1237.63	78.415	551.858	1233.28	215.803	624.823	1041.16	-17.8986	635.173	1049.45	296.184	561.958	1014.44	152.394	639.53	674.236	-123.316	363.594	701.549	-106.547	373.388	712.272	-31.9778	278.591	719.089	-53.9759	176.955	688.077	-36.8833	666.132	674.106	394.651	398.461	699.933	425.153	389.9	709.903	351.874	295.749	720.196	385.147	201.369	690.11	376.394
656	6.55	498.865	1238.93	151.288	543.689	1237.65	78.4236	551.916	1233.3	215.84	624.86	1041.13	-17.8842	635.21	1049.42	296.205	561.94	1014.43	152.398	639.525	674.187	-123.269	363.605	701.552	-106.558	373.384	712.271	-31.989	278.577	719.093	-53.9862	176.892	688.119	-36.8592	666.126	674.059	394.609	398.455	699.921	425.15	389.838	709.925	351.844	295.704	720.205	385.145	201.343	690.117	376.4
657	6.56	498.901	1238.92	151.314	543.741	1237.65	78.4448	552.055	1233.29	215.839	624.886	1041.11	-17.8641	635.292	1049.38	296.228	561.962	1014.4	152.403	639.549	674.152	-123.207	363.624	701.542	-106.562	373.388	712.249	-31.9877	278.572	719.081	-53.9845	176.88	688.115	-36.8399	666.145	674.028	394.568	398.417	699.867	425.143	389.789	709.921	351.826	295.691	720.193	385.153	201.347	690.092	376.386
658	6.57	498.976	1238.87	151.386	543.829	1237.62	78.4661	552.136	1233.29	215.86	624.892	1041.07	-17.8344	635.352	1049.33	296.247	562.068	1014.33	152.45	639.604	674.103	-123.149	363.642	701.493	-106.535	373.425	712.218	-31.9746	278.593	719.051	-53.9661	176.946	688.056	-36.8712	666.18	673.986	394.525	398.447	699.821	425.153	389.818	709.864	351.862	295.75	720.149	385.168	201.383	690.058	376.385
659	6.58	499.154	1238.79	151.467	543.893	1237.58	78.5045	552.24	1233.29	215.932	624.889	1041.03	-17.7954	635.381	1049.29	296.281	562.167	1014.27	152.517	639.613	674.049	-123.115	363.644	701.468	-106.508	373.442	712.188	-31.9456	278.62	719.02	-53.9426	176.956	687.989	-36.8628	666.178	673.921	394.487	398.467	699.797	425.164	389.962	709.791	351.881	295.815	720.092	385.19	201.412	690.03	376.407
660	6.59	499.264	1238.76	151.493	543.959	1237.56	78.5075	552.328	1233.28	215.968	624.91	1041.01	-17.7635	635.405	1049.24	296.313	562.237	1014.2	152.554	639.588	673.995	-123.083	363.63	701.45	-106.504	373.44	712.164	-31.9209	278.663	718.988	-53.9563	176.99	687.962	-36.8928	666.188	673.877	394.442	398.457	699.783	425.173	390.038	709.779	351.901	295.841	720.073	385.206	201.412	690.009	376.424
661	6.6	499.361	1238.76	151.472	544.007	1237.58	78.4996	552.319	1233.29	215.957	624.909	1040.99	-17.7587	635.433	1049.21	296.32	562.27	1014.16	152.557	639.589	673.974	-123.036	363.654	701.439	-106.52	373.443	712.159	-31.9223	278.708	718.975	-54.0046	177.039	687.956	-36.9207	666.223	673.881	394.413	398.439	699.775	425.168	389.95	709.811	351.902	295.867	720.096	385.177	201.006	690.312	376.422
662	6.61	499.418	1238.8	151.496	544.073	1237.62	78.4912	552.361	1233.34	215.955	624.922	1041.01	-17.7569	635.44	1049.2	296.322	562.261	1014.17	152.545	639.626	673.983	-122.994	363.667	701.46	-106.522	373.437	712.172	-31.9206	278.702	718.993	-54.0086	177.003	687.982	-36.8985	666.213	673.869	394.41	398.435	699.792	425.157	390.016	709.781	351.876	295.865	720.123	385.166	200.051	691.031	376.444
663	6.62	499.347	1238.91	151.517	544.101	1237.68	78.5156	552.395	1233.38	215.971	624.949	1041.03	-17.7446	635.431	1049.22	296.348	562.275	1014.2	152.569	639.629	673.969	-122.941	363.629	701.501	-106.513	373.435	712.188	-31.92	278.639	719.033	-53.973	176.974	688.019	-36.8811	666.179	673.855	394.393	398.44	699.797	425.158	390.092	709.782	351.863	295.829	720.147	385.171	199.781	691.26	376.465
664	6.63	499.289	1238.99	151.558	544.098	1237.75	78.5387	552.427	1233.41	215.979	624.961	1041.04	-17.724	635.412	1049.24	296.386	562.275	1014.21	152.583	639.624	673.951	-122.889	363.645	701.523	-106.493	373.394	712.228	-31.9058	278.591	719.09	-53.9516	176.941	688.095	-36.8766	666.144	673.819	394.382	398.461	699.821	425.147	390.031	709.822	351.86	295.798	720.177	385.179	200.112	691.02	376.459
665	6.64	499.296	1239.05	151.57	544.137	1237.81	78.5459	552.453	1233.43	215.998	624.949	1041.04	-17.7133	635.429	1049.24	296.401	562.23	1014.21	152.591	639.642	673.954	-122.848	363.656	701.541	-106.475	373.379	712.245	-31.9156	278.603	719.104	-53.9554	176.945	688.126	-36.8739	666.191	673.803	394.381	398.463	699.822	425.146	389.853	709.877	351.879	295.779	720.202	385.191	200.632	690.642	376.424
666	6.65	499.32	1239.08	151.576	544.186	1237.83	78.5593	552.518	1233.42	215.97	624.932	1041.03	-17.7084	635.471	1049.21	296.422	562.224	1014.2	152.606	639.655	673.949	-122.8	363.7	701.544	-106.481	373.369	712.254	-31.9074	278.602	719.095	-53.9551	176.935	688.11	-36.8668	666.202	673.782	394.384	398.435	699.821	425.156	389.927	709.875	351.888	295.786	720.2	385.183	200.336	690.859	376.443
667	6.66	499.396	1239.08	151.576	544.251	1237.83	78.572	552.559	1233.44	215.986	624.927	1041	-17.6807	635.484	1049.18	296.438	562.249	1014.18	152.619	639.64	673.916	-122.768	363.713	701.531	-106.478	373.363	712.24	-31.8957	278.595	719.084	-53.9575	176.93	688.089	-36.8628	666.177	673.757	394.361	398.433	699.805	425.158	389.961	709.868	351.899	295.777	720.159	385.172	201.139	690.272	376.423
668	6.67	499.445	1239.07	151.587	544.286	1237.82	78.5655	552.533	1233.47	216.014	624.914	1040.98	-17.6442	635.46	1049.15	296.445	562.256	1014.15	152.616	639.603	673.873	-122.729	363.675	701.524	-106.472	373.379	712.231	-31.9044	278.614	719.064	-53.9825	176.926	688.062	-36.865	666.159	673.736	394.366	398.465	699.791	425.165	389.934	709.86	351.896	295.797	720.121	385.175	201.308	690.107	376.404
669	6.68	499.501	1239.07	151.561	544.316	1237.82	78.5711	552.528	1233.48	216.03	624.919	1040.98	-17.6272	635.466	1049.1	296.451	562.226	1014.12	152.6	639.607	673.85	-122.699	363.676	701.52	-106.477	373.368	712.214	-31.9104	278.635	719.039	-54.0092	176.943	688.061	-36.9072	666.178	673.745	394.378	398.467	699.804	425.171	389.824	709.896	351.904	295.782	720.117	385.178	201.337	690.063	376.386
670	6.69	499.576	1239.06	151.579	544.391	1237.8	78.5622	552.636	1233.5	216.023	624.939	1040.99	-17.6277	635.494	1049.06	296.461	562.282	1014.08	152.62	639.626	673.854	-122.68	363.675	701.507	-106.483	373.372	712.198	-31.9019	278.65	719.015	-54.0156	176.917	688.031	-36.9218	666.167	673.734	394.377	398.45	699.82	425.187	389.843	709.913	351.895	295.798	720.112	385.168	201.364	690.049	376.373
671	6.7	499.729	1239.05	151.636	544.442	1237.8	78.6036	552.753	1233.5	216.05	624.94	1040.98	-17.6147	635.532	1049.06	296.475	562.367	1014.05	152.654	639.65	673.841	-122.665	363.668	701.504	-106.448	373.357	712.203	-31.8944	278.655	719.032	-54.0144	176.93	688.003	-36.9229	666.141	673.692	394.344	398.441	699.818	425.197	389.927	709.873	351.895	295.805	720.105	385.171	201.384	690.048	376.391
672	6.71	499.691	1239.07	151.702	544.453	1237.85	78.6434	552.789	1233.49	216.071	624.926	1040.96	-17.5908	635.533	1049.06	296.513	562.403	1014.04	152.686	639.65	673.806	-122.622	363.676	701.497	-106.425	373.364	712.205	-31.8991	278.617	719.054	-53.9851	176.942	688.023	-36.9157	666.135	673.649	394.322	398.455	699.794	425.171	389.946	709.852	351.918	295.802	720.13	385.179	201.4	690.06	376.396
673	6.72	499.662	1239.1	151.769	544.466	1237.88	78.686	552.808	1233.5	216.087	624.918	1040.94	-17.5745	635.539	1049.05	296.557	562.433	1014.02	152.719	639.675	673.79	-122.575	363.686	701.489	-106.419	373.415	712.186	-31.8955	278.59	719.072	-53.951	176.863	688.082	-36.8494	666.122	673.609	394.339	398.44	699.772	425.171	389.957	709.833	351.924	295.765	720.161	385.203	201.374	690.087	376.41
674	6.73	499.793	1239.08	151.848	544.53	1237.88	78.7231	552.939	1233.5	216.12	624.925	1040.92	-17.5555	635.575	1049.04	296.592	562.518	1013.97	152.768	639.66	673.763	-122.55	363.703	701.487	-106.427	373.416	712.166	-31.8641	278.609	719.074	-53.9311	176.919	688.069	-36.8331	666.154	673.594	394.312	398.43	699.763	425.187	390.124	709.773	351.915	295.802	720.166	385.219	201.4	690.094	376.432
675	6.74	499.967	1239.04	151.89	544.599	1237.89	78.7345	553.109	1233.52	216.178	624.945	1040.91	-17.5343	635.62	1049.01	296.593	562.586	1013.92	152.796	639.635	673.747	-122.546	363.711	701.468	-106.428	373.429	712.162	-31.8509	278.636	719.061	-53.9233	176.989	688.046	-36.8531	666.128	673.569	394.279	398.456	699.76	425.193	390.154	709.738	351.904	295.851	720.141	385.209	201.446	690.086	376.44
676	6.75	499.97	1239.05	151.906	544.629	1237.88	78.7403	553.113	1233.52	216.206	624.968	1040.91	-17.5309	635.651	1048.98	296.601	562.577	1013.94	152.798	639.609	673.709	-122.506	363.72	701.482	-106.425	373.422	712.158	-31.8623	278.652	719.05	-53.9503	176.965	688.041	-36.8635	666.143	673.534	394.24	398.452	699.769	425.183	390.061	709.756	351.908	295.886	720.127	385.188	201.447	690.083	376.424
677	6.76	499.898	1239.11	151.89	544.616	1237.87	78.7407	553.099	1233.52	216.209	625.002	1040.92	-17.5219	635.697	1048.96	296.612	562.55	1013.96	152.779	639.582	673.661	-122.462	363.716	701.506	-106.427	373.373	712.172	-31.8665	278.643	719.052	-53.9849	176.975	688.016	-36.889	666.142	673.477	394.202	398.454	699.766	425.169	389.992	709.793	351.908	295.864	720.128	385.164	201.433	690.067	376.41
678	6.77	499.943	1239.13	151.888	544.674	1237.87	78.7367	553.143	1233.54	216.193	625.07	1040.94	-17.5191	635.748	1048.93	296.6	562.567	1013.96	152.765	639.61	673.649	-122.424	363.734	701.525	-106.458	373.357	712.185	-31.8688	278.642	719.053	-54.0202	177.054	687.998	-36.9705	666.147	673.427	394.165	398.511	699.78	425.164	389.998	709.844	351.876	295.867	720.118	385.145	201.454	690.047	376.386
679	6.78	499.978	1239.14	151.891	544.68	1237.89	78.7464	553.263	1233.56	216.186	625.097	1040.94	-17.5075	635.794	1048.91	296.589	562.633	1013.95	152.77	639.625	673.639	-122.41	363.757	701.54	-106.489	373.34	712.205	-31.8753	278.673	719.05	-54.0366	177.05	688.01	-37.0062	666.139	673.407	394.123	398.563	699.79	425.155	390.064	709.869	351.831	295.883	720.118	385.118	201.014	690.357	376.39
680	6.79	499.953	1239.16	151.923	544.681	1237.91	78.7783	553.283	1233.57	216.215	625.101	1040.94	-17.4867	635.828	1048.9	296.617	562.619	1013.95	152.783	639.618	673.616	-122.373	363.768	701.552	-106.48	373.322	712.215	-31.8534	278.662	719.064	-54.021	177.022	688.04	-36.9952	666.162	673.4	394.11	398.574	699.779	425.148	389.955	709.928	351.869	295.85	720.128	385.134	200.453	690.747	376.41
681	6.8	499.922	1239.16	151.992	544.675	1237.92	78.8361	553.259	1233.55	216.289	625.116	1040.95	-17.4484	635.847	1048.89	296.674	562.613	1013.94	152.825	639.593	673.599	-122.309	363.77	701.579	-106.449	373.324	712.221	-31.8337	278.619	719.088	-53.9798	176.994	688.065	-36.9381	666.194	673.4	394.103	398.558	699.78	425.152	389.835	709.943	351.888	295.79	720.143	385.174	201.179	690.233	376.398
682	6.81	500.069	1239.11	152.076	544.689	1237.94	78.9167	553.303	1233.54	216.339	625.112	1040.94	-17.4175	635.878	1048.88	296.72	562.673	1013.91	152.9	639.57	673.608	-122.288	363.773	701.56	-106.404	373.346	712.207	-31.8107	278.596	719.092	-53.9258	176.985	688.071	-36.91	666.165	673.37	394.057	398.531	699.764	425.17	389.925	709.862	351.889	295.782	720.155	385.196	201.366	690.127	376.42
683	6.82	500.196	1239.04	152.161	544.74	1237.92	78.9566	553.351	1233.54	216.395	625.081	1040.93	-17.411	635.91	1048.85	296.758	562.804	1013.83	152.946	639.55	673.634	-122.26	363.775	701.516	-106.365	373.393	712.18	-31.8065	278.614	719.077	-53.9106	177.02	688.071	-36.8893	666.102	673.313	394.007	398.513	699.741	425.179	390.088	709.77	351.912	295.793	720.152	385.226	201.405	690.1	376.438
684	6.83	500.231	1238.96	152.184	544.781	1237.87	78.9746	553.286	1233.51	216.429	625.064	1040.91	-17.3742	635.942	1048.81	296.777	562.875	1013.77	152.972	639.547	673.635	-122.202	363.744	701.501	-106.358	373.435	712.149	-31.7989	278.628	719.058	-53.9224	177.004	688.048	-36.8814	666.088	673.288	393.989	398.476	699.729	425.183	390.15	709.734	351.908	295.789	720.15	385.219	201.403	690.092	376.436
685	6.84	500.239	1238.92	152.182	544.814	1237.83	78.9803	553.244	1233.5	216.465	625.099	1040.89	-17.3274	635.967	1048.77	296.796	562.898	1013.73	152.985	639.545	673.644	-122.135	363.747	701.502	-106.366	373.418	712.142	-31.7992	278.646	719.036	-53.9513	176.996	688.005	-36.9027	666.129	673.297	393.99	398.434	699.707	425.175	390.197	709.704	351.895	295.794	720.139	385.21	201.396	690.091	376.426
686	6.85	500.288	1238.92	152.189	544.834	1237.82	78.9814	553.301	1233.52	216.496	625.148	1040.9	-17.3039	636.002	1048.74	296.805	562.932	1013.73	152.985	639.535	673.633	-122.106	363.78	701.522	-106.385	373.406	712.144	-31.7961	278.673	719.018	-53.982	177.02	687.983	-36.9424	666.138	673.281	393.956	398.455	699.726	425.155	390.101	709.728	351.898	295.841	720.112	385.194	201.403	690.083	376.413
687	6.86	500.365	1238.93	152.201	544.89	1237.82	78.9769	553.352	1233.53	216.505	625.167	1040.92	-17.3105	636.036	1048.72	296.815	562.971	1013.73	153.002	639.534	673.592	-122.081	363.816	701.52	-106.411	373.379	712.158	-31.7861	278.686	719.025	-53.9865	177.044	687.973	-36.97	666.135	673.211	393.91	398.488	699.725	425.138	389.978	709.794	351.872	295.857	720.104	385.18	201.412	690.058	376.403
688	6.87	500.345	1238.96	152.193	544.883	1237.83	78.9834	553.362	1233.52	216.523	625.202	1040.93	-17.2747	636.093	1048.7	296.839	562.958	1013.73	152.997	639.566	673.578	-122.038	363.807	701.536	-106.401	373.341	712.174	-31.7776	278.677	719.033	-53.9958	177.028	688.015	-36.9719	666.141	673.143	393.861	398.498	699.712	425.14	390.088	709.79	351.852	295.856	720.099	385.17	201.414	690.056	376.407
689	6.88	500.322	1238.99	152.203	544.881	1237.87	78.995	553.375	1233.49	216.534	625.199	1040.91	-17.249	636.167	1048.69	296.865	562.951	1013.73	153.007	639.536	673.547	-121.986	363.805	701.538	-106.38	373.368	712.187	-31.7933	278.655	719.049	-53.9867	177.057	688.038	-36.9945	666.163	673.077	393.855	398.503	699.698	425.126	389.928	709.858	351.895	295.9	720.094	385.17	201.42	690.079	376.403
690	6.89	500.379	1239.02	152.274	544.89	1237.89	79.0341	553.435	1233.47	216.569	625.237	1040.92	-17.2172	636.213	1048.67	296.881	562.96	1013.73	153.046	639.53	673.514	-121.968	363.805	701.562	-106.385	373.393	712.183	-31.7939	278.648	719.073	-53.9761	177.075	688.049	-36.9999	666.189	673.031	393.825	398.513	699.705	425.125	389.935	709.838	351.906	295.927	720.109	385.181	201.448	690.079	376.406
691	6.9	500.43	1239.04	152.317	544.89	1237.89	79.0763	553.496	1233.48	216.62	625.267	1040.93	-17.196	636.231	1048.64	296.896	562.982	1013.72	153.074	639.56	673.511	-121.936	363.809	701.585	-106.383	373.383	712.183	-31.7883	278.653	719.09	-53.9589	177.019	688.093	-36.9492	666.164	673.008	393.793	398.565	699.693	425.141	389.957	709.833	351.882	295.906	720.126	385.197	201.469	690.077	376.419
692	6.91	500.424	1239.03	152.348	544.908	1237.88	79.0994	553.51	1233.48	216.681	625.272	1040.92	-17.1739	636.245	1048.62	296.913	563.015	1013.7	153.087	639.554	673.497	-121.893	363.801	701.583	-106.36	373.403	712.178	-31.7929	278.636	719.086	-53.9398	177.009	688.101	-36.9488	666.168	672.987	393.776	398.562	699.692	425.15	389.889	709.871	351.88	295.826	720.143	385.209	201.459	690.082	376.426
693	6.92	500.357	1239.01	152.392	544.916	1237.89	79.1196	553.538	1233.47	216.708	625.254	1040.91	-17.1528	636.256	1048.6	296.93	563.026	1013.68	153.106	639.563	673.496	-121.861	363.821	701.557	-106.36	373.396	712.165	-31.7729	278.64	719.076	-53.9539	176.981	688.078	-36.9439	666.178	672.989	393.762	398.57	699.711	425.158	389.896	709.852	351.875	295.821	720.16	385.201	201.458	690.085	376.419
694	6.93	500.418	1239	152.426	544.932	1237.89	79.1412	553.578	1233.49	216.739	625.233	1040.9	-17.1498	636.24	1048.57	296.953	563.047	1013.65	153.133	639.556	673.494	-121.83	363.839	701.554	-106.375	373.363	712.151	-31.7593	278.644	719.067	-53.9645	177.033	688.029	-36.9553	666.119	672.941	393.751	398.574	699.724	425.161	389.867	709.868	351.89	295.821	720.156	385.189	201.466	690.077	376.41
695	6.94	500.539	1238.96	152.457	544.956	1237.86	79.1734	553.556	1233.49	216.803	625.228	1040.9	-17.1212	636.236	1048.55	296.979	563.072	1013.59	153.154	639.535	673.475	-121.786	363.851	701.558	-106.375	373.341	712.149	-31.7457	278.675	719.034	-53.9716	177.03	688.005	-36.9538	666.126	672.927	393.742	398.58	699.713	425.164	389.928	709.836	351.882	295.801	720.147	385.186	201.435	690.069	376.405
696	6.95	500.575	1238.93	152.478	544.957	1237.84	79.1959	553.561	1233.5	216.835	625.224	1040.88	-17.0909	636.25	1048.52	297.013	563.096	1013.54	153.172	639.572	673.472	-121.733	363.86	701.545	-106.37	373.316	712.151	-31.7249	278.707	719.002	-53.9887	177.021	687.993	-36.953	666.151	672.908	393.725	398.581	699.691	425.17	390.035	709.789	351.878	295.825	720.122	385.181	201.411	690.072	376.401
697	6.96	500.627	1238.91	152.508	544.964	1237.84	79.2183	553.618	1233.5	216.883	625.216	1040.85	-17.0315	636.244	1048.5	297.053	563.072	1013.52	153.221	639.589	673.451	-121.699	363.855	701.518	-106.355	373.338	712.134	-31.7106	278.718	718.999	-53.9753	177.024	687.989	-36.9643	666.143	672.893	393.71	398.556	699.667	425.183	390.018	709.778	351.908	295.863	720.105	385.201	201.438	690.066	376.418
698	6.97	500.615	1238.93	152.579	544.955	1237.86	79.2703	553.586	1233.48	216.95	625.199	1040.83	-17.0052	636.244	1048.49	297.106	563.11	1013.48	153.263	639.583	673.424	-121.676	363.846	701.522	-106.345	373.357	712.118	-31.6975	278.678	719.012	-53.9436	177.01	687.999	-36.9382	666.134	672.865	393.699	398.57	699.648	425.179	390.063	709.755	351.915	295.85	720.105	385.242	201.477	690.066	376.433
699	6.98	500.563	1238.98	152.614	544.967	1237.89	79.2972	553.623	1233.47	216.982	625.226	1040.83	-16.9981	636.257	1048.49	297.139	563.127	1013.46	153.288	639.59	673.413	-121.626	363.816	701.531	-106.331	373.348	712.123	-31.6946	278.655	719.032	-53.9355	176.985	688.025	-36.9087	666.173	672.849	393.677	398.538	699.632	425.179	390.111	709.745	351.893	295.872	720.095	385.253	201.479	690.073	376.451
700	6.99	500.538	1239.03	152.616	544.961	1237.9	79.2968	553.684	1233.5	216.969	625.213	1040.83	-16.98	636.269	1048.47	297.155	563.121	1013.46	153.291	639.638	673.412	-121.58	363.822	701.563	-106.331	373.341	712.139	-31.692	278.665	719.039	-53.9492	176.997	688.043	-36.9129	666.181	672.823	393.646	398.553	699.623	425.182	390.127	709.73	351.887	295.938	720.092	385.221	201.487	690.083	376.436
701	7	500.469	1239.09	152.634	544.939	1237.93	79.2965	553.556	1233.53	216.965	625.186	1040.85	-16.9565	636.267	1048.47	297.165	563.08	1013.47	153.299	639.654	673.407	-121.517	363.829	701.59	-106.323	373.35	712.158	-31.7133	278.665	719.058	-53.9629	176.957	688.076	-36.9187	666.175	672.776	393.677	398.56	699.643	425.166	389.992	709.811	351.907	295.935	720.12	385.187	201.499	690.076	376.416
702	7.01	500.474	1239.12	152.642	544.949	1237.94	79.2912	553.512	1233.55	216.994	625.202	1040.88	-16.9335	636.259	1048.46	297.179	563.046	1013.49	153.294	639.651	673.424	-121.468	363.834	701.594	-106.342	373.307	712.173	-31.713	278.655	719.079	-53.9743	176.897	688.097	-36.9331	666.191	672.756	393.687	398.557	699.671	425.164	389.903	709.886	351.914	295.905	720.151	385.186	201.488	690.079	376.406
703	7.02	500.515	1239.12	152.618	544.983	1237.93	79.2793	553.545	1233.58	217.013	625.213	1040.92	-16.9124	636.257	1048.43	297.194	563.096	1013.49	153.282	639.655	673.43	-121.436	363.846	701.595	-106.352	373.287	712.189	-31.7163	278.656	719.086	-53.995	176.915	688.111	-36.9632	666.169	672.714	393.676	398.58	699.694	425.156	389.832	709.929	351.921	295.862	720.166	385.184	201.462	690.098	376.392
704	7.03	500.589	1239.08	152.61	545.015	1237.9	79.2869	553.576	1233.58	217.009	625.226	1040.94	-16.9091	636.273	1048.41	297.197	563.12	1013.48	153.301	639.678	673.462	-121.4	363.892	701.582	-106.362	373.309	712.166	-31.7315	278.677	719.068	-54.005	176.992	688.083	-37.0155	666.158	672.728	393.689	398.585	699.697	425.161	389.851	709.921	351.921	295.835	720.166	385.163	201.441	690.093	376.382
705	7.04	500.667	1238.99	152.615	545.024	1237.85	79.3125	553.542	1233.56	217.048	625.244	1040.92	-16.8883	636.275	1048.38	297.217	563.141	1013.45	153.334	639.692	673.486	-121.361	363.89	701.581	-106.336	373.283	712.141	-31.6951	278.696	719.048	-53.9997	177.066	688.032	-37.0296	666.129	672.72	393.705	398.568	699.682	425.166	389.937	709.883	351.919	295.797	720.17	385.163	201.42	690.082	376.387
706	7.05	500.693	1238.93	152.657	545.025	1237.82	79.3534	553.585	1233.53	217.095	625.231	1040.89	-16.8676	636.292	1048.34	297.246	563.198	1013.4	153.393	639.686	673.475	-121.337	363.885	701.547	-106.301	373.284	712.118	-31.6634	278.71	719.031	-53.9761	177.059	688.009	-37.0045	666.058	672.655	393.715	398.568	699.65	425.169	390.013	709.82	351.938	295.811	720.161	385.201	200.998	690.388	376.427
707	7.06	500.692	1238.91	152.689	545.05	1237.8	79.3933	553.661	1233.49	217.13	625.269	1040.88	-16.8297	636.335	1048.33	297.267	563.299	1013.35	153.432	639.679	673.449	-121.333	363.896	701.523	-106.278	373.334	712.095	-31.6418	278.713	719.027	-53.9523	177.057	688.009	-36.9774	666.043	672.621	393.711	398.576	699.616	425.171	390.126	709.739	351.943	295.841	720.136	385.236	200.498	690.765	376.464
708	7.07	500.661	1238.91	152.72	545.046	1237.8	79.4264	553.659	1233.45	217.163	625.291	1040.87	-16.793	636.378	1048.32	297.288	563.316	1013.33	153.456	639.712	673.451	-121.3	363.909	701.529	-106.26	373.303	712.096	-31.6144	278.661	719.036	-53.9228	177.043	688.014	-36.9473	666.122	672.638	393.704	398.587	699.616	425.19	390.237	709.688	351.941	295.859	720.125	385.268	201.227	690.245	376.465
709	7.08	500.613	1238.92	152.731	545.046	1237.79	79.449	553.661	1233.43	217.173	625.325	1040.86	-16.7752	636.417	1048.3	297.3	563.306	1013.33	153.457	639.739	673.442	-121.254	363.894	701.542	-106.265	373.307	712.103	-31.6188	278.624	719.054	-53.8995	176.966	688.027	-36.9091	666.162	672.633	393.707	398.594	699.607	425.203	390.204	709.681	351.939	295.812	720.109	385.276	201.394	690.114	376.463
710	7.09	500.618	1238.92	152.735	545.072	1237.81	79.447	553.657	1233.42	217.181	625.364	1040.86	-16.7834	636.455	1048.29	297.3	563.349	1013.32	153.454	639.704	673.399	-121.239	363.912	701.549	-106.265	373.353	712.12	-31.6493	278.661	719.05	-53.9279	176.962	688.043	-36.9266	666.118	672.553	393.687	398.651	699.604	425.199	390.098	709.734	351.941	295.831	720.116	385.234	201.452	690.089	376.437
711	7.1	500.668	1238.91	152.72	545.114	1237.81	79.4313	553.741	1233.41	217.154	625.423	1040.88	-16.7824	636.528	1048.29	297.293	563.353	1013.33	153.453	639.698	673.376	-121.251	363.935	701.567	-106.272	373.343	712.124	-31.6506	278.676	719.035	-53.9612	177.03	688.052	-36.9639	666.161	672.545	393.645	398.67	699.612	425.201	390.023	709.782	351.921	295.907	720.115	385.205	201.499	690.08	376.426
712	7.11	500.666	1238.9	152.695	545.148	1237.79	79.4095	553.742	1233.42	217.159	625.467	1040.89	-16.7742	636.563	1048.27	297.298	563.362	1013.33	153.451	639.725	673.366	-121.221	363.93	701.575	-106.297	373.286	712.135	-31.6475	278.675	719.042	-53.9772	177.035	688.034	-37.0016	666.167	672.55	393.633	398.636	699.635	425.2	389.924	709.856	351.923	295.92	720.122	385.18	201.503	690.079	376.419
713	7.12	500.685	1238.89	152.686	545.169	1237.79	79.4015	553.695	1233.41	217.183	625.469	1040.86	-16.7784	636.577	1048.26	297.303	563.377	1013.32	153.449	639.759	673.362	-121.177	363.929	701.572	-106.314	373.287	712.14	-31.6692	278.7	719.04	-53.9934	176.99	688.041	-37.0183	666.173	672.54	393.626	398.617	699.644	425.182	389.917	709.865	351.903	295.929	720.133	385.177	201.497	690.086	376.406
714	7.13	500.733	1238.89	152.693	545.199	1237.78	79.4016	553.704	1233.4	217.197	625.496	1040.85	-16.7926	636.613	1048.25	297.3	563.426	1013.31	153.449	639.765	673.353	-121.148	363.944	701.577	-106.343	373.306	712.13	-31.6775	278.704	719.045	-54.0106	177.042	688.021	-37.0741	666.161	672.505	393.605	398.586	699.637	425.171	389.95	709.862	351.895	295.917	720.136	385.166	201.514	690.083	376.383
715	7.14	500.76	1238.88	152.73	545.201	1237.79	79.4473	553.748	1233.4	217.221	625.53	1040.83	-16.7748	636.665	1048.24	297.299	563.464	1013.29	153.466	639.779	673.336	-121.124	363.964	701.574	-106.335	373.36	712.127	-31.6614	278.706	719.05	-53.9897	177.069	688.022	-37.0626	666.18	672.488	393.571	398.593	699.642	425.166	390.012	709.828	351.892	295.879	720.138	385.185	201.523	690.091	376.388
716	7.15	500.783	1238.87	152.763	545.223	1237.81	79.4702	553.788	1233.41	217.231	625.554	1040.82	-16.7519	636.693	1048.24	297.306	563.438	1013.28	153.488	639.767	673.306	-121.073	363.933	701.584	-106.289	373.36	712.139	-31.6433	278.679	719.063	-53.9644	177.005	688.064	-37.0206	666.227	672.497	393.543	398.604	699.639	425.175	390.031	709.798	351.87	295.844	720.163	385.214	201.482	690.112	376.414
717	7.16	500.797	1238.86	152.782	545.278	1237.8	79.4785	553.789	1233.41	217.22	625.561	1040.82	-16.7408	636.709	1048.23	297.318	563.491	1013.27	153.482	639.76	673.277	-121.017	363.922	701.575	-106.273	373.339	712.132	-31.632	278.66	719.062	-53.9534	176.971	688.089	-36.9968	666.192	672.487	393.499	398.547	699.625	425.175	390.002	709.796	351.907	295.818	720.175	385.238	201.454	690.117	376.431
718	7.17	500.859	1238.86	152.782	545.296	1237.79	79.5014	553.87	1233.4	217.208	625.62	1040.82	-16.7359	636.747	1048.22	297.323	563.565	1013.26	153.472	639.769	673.268	-120.992	363.949	701.563	-106.275	373.339	712.115	-31.6236	278.685	719.053	-53.9665	176.993	688.053	-37.0018	666.211	672.474	393.473	398.557	699.612	425.176	389.958	709.807	351.953	295.842	720.172	385.235	201.475	690.106	376.436
719	7.18	500.906	1238.87	152.798	545.336	1237.77	79.5048	553.998	1233.41	217.183	625.657	1040.79	-16.7296	636.807	1048.21	297.31	563.596	1013.25	153.482	639.803	673.254	-120.956	363.96	701.559	-106.27	373.345	712.098	-31.6184	278.704	719.042	-53.9832	177.028	688.014	-36.9966	666.251	672.468	393.448	398.609	699.6	425.167	389.974	709.797	351.94	295.912	720.151	385.214	201.079	690.406	376.444
720	7.19	500.914	1238.88	152.791	545.389	1237.78	79.4936	554.036	1233.4	217.188	625.671	1040.76	-16.7413	636.852	1048.2	297.307	563.654	1013.21	153.496	639.828	673.238	-120.89	363.975	701.547	-106.265	373.349	712.088	-31.6145	278.712	719.032	-53.9771	177.05	687.996	-37.0084	666.258	672.434	393.425	398.629	699.579	425.162	390.024	709.76	351.897	295.924	720.122	385.196	200.532	690.781	376.461
721	7.2	500.945	1238.9	152.796	545.423	1237.79	79.4845	554.086	1233.4	217.208	625.676	1040.74	-16.7153	636.883	1048.2	297.309	563.651	1013.2	153.529	639.841	673.222	-120.86	363.975	701.534	-106.242	373.317	712.08	-31.599	278.694	719.031	-53.9524	177.036	688.035	-36.986	666.274	672.423	393.395	398.663	699.563	425.163	390.071	709.729	351.89	295.925	720.109	385.2	201.277	690.255	376.447
722	7.21	500.951	1238.93	152.809	545.461	1237.81	79.4934	554.105	1233.42	217.215	625.698	1040.74	-16.7003	636.895	1048.2	297.316	563.668	1013.2	153.532	639.829	673.194	-120.837	363.969	701.533	-106.231	373.312	712.066	-31.5752	278.685	719.025	-53.9334	177.027	688.031	-36.9771	666.293	672.405	393.375	398.667	699.567	425.152	390.045	709.751	351.93	295.95	720.095	385.215	201.468	690.127	376.449
723	7.22	501.006	1238.96	152.8	545.527	1237.82	79.4772	554.149	1233.46	217.19	625.729	1040.74	-16.7166	636.892	1048.19	297.323	563.638	1013.21	153.543	639.88	673.165	-120.795	363.971	701.538	-106.256	373.318	712.064	-31.5846	278.701	719.03	-53.9534	177.044	688.013	-37.007	666.269	672.381	393.346	398.683	699.563	425.136	390.071	709.747	351.922	295.935	720.106	385.219	201.515	690.083	376.443
724	7.23	501.064	1238.98	152.743	545.619	1237.85	79.4097	554.179	1233.49	217.144	625.735	1040.74	-16.738	636.916	1048.19	297.302	563.642	1013.21	153.522	639.89	673.166	-120.759	363.983	701.547	-106.279	373.314	712.077	-31.6119	278.719	719.025	-53.9983	177.059	688.021	-37.039	666.289	672.377	393.358	398.654	699.587	425.138	390.204	709.726	351.88	295.94	720.112	385.187	201.532	690.08	376.426
725	7.24	501.089	1239.02	152.691	545.668	1237.88	79.3747	554.218	1233.51	217.084	625.749	1040.74	-16.7487	636.928	1048.2	297.28	563.646	1013.22	153.482	639.882	673.158	-120.728	363.97	701.558	-106.277	373.318	712.094	-31.6345	278.733	719.026	-54.0162	177.054	688.034	-37.0514	666.29	672.388	393.342	398.647	699.613	425.134	390.121	709.792	351.852	295.931	720.126	385.156	201.524	690.087	376.403
726	7.25	501.117	1239.06	152.682	545.716	1237.93	79.3508	554.308	1233.56	217.055	625.751	1040.75	-16.7543	636.937	1048.22	297.284	563.644	1013.25	153.474	639.907	673.162	-120.713	363.99	701.579	-106.287	373.321	712.113	-31.652	278.703	719.043	-54.0027	177.048	688.056	-37.052	666.282	672.398	393.318	398.653	699.631	425.144	389.93	709.852	351.865	295.896	720.149	385.145	201.523	690.103	376.406
727	7.26	501.103	1239.12	152.683	545.785	1237.97	79.3321	554.434	1233.59	217.023	625.758	1040.78	-16.747	636.951	1048.24	297.28	563.686	1013.26	153.484	639.895	673.14	-120.678	364	701.594	-106.294	373.336	712.126	-31.6417	278.7	719.059	-53.9884	177.059	688.078	-37.0291	666.291	672.414	393.324	398.647	699.646	425.14	389.917	709.867	351.899	295.943	720.165	385.158	201.525	690.13	376.416
728	7.27	501.202	1239.13	152.636	545.834	1237.99	79.3161	554.41	1233.59	217.024	625.751	1040.77	-16.7573	636.966	1048.23	297.281	563.707	1013.25	153.476	639.885	673.122	-120.636	363.992	701.615	-106.284	373.362	712.132	-31.6373	278.721	719.071	-53.9951	177.073	688.068	-37.0442	666.26	672.401	393.315	398.667	699.637	425.152	389.977	709.847	351.868	295.919	720.177	385.169	201.537	690.131	376.419
729	7.28	501.172	1239.17	152.618	545.884	1237.99	79.2897	554.433	1233.58	216.997	625.796	1040.74	-16.7562	636.974	1048.23	297.282	563.703	1013.23	153.476	639.916	673.112	-120.635	364.009	701.601	-106.278	373.339	712.108	-31.6228	278.706	719.062	-53.9852	177.066	688.062	-37.0639	666.258	672.387	393.323	398.629	699.616	425.129	389.998	709.827	351.855	295.898	720.164	385.187	201.545	690.124	376.418
730	7.29	501.182	1239.15	152.615	545.923	1237.99	79.2972	554.562	1233.59	216.965	625.816	1040.73	-16.7588	636.989	1048.21	297.278	563.741	1013.18	153.488	639.946	673.096	-120.623	363.991	701.573	-106.248	373.323	712.082	-31.5834	278.691	719.056	-53.9594	177.059	688.044	-37.0355	666.243	672.383	393.322	398.593	699.593	425.132	390.006	709.777	351.882	295.884	720.158	385.192	201.521	690.105	376.421
731	7.3	501.378	1239.09	152.575	545.991	1237.97	79.2804	554.617	1233.61	216.92	625.83	1040.71	-16.7579	636.995	1048.19	297.276	563.791	1013.14	153.506	639.92	673.066	-120.597	363.987	701.563	-106.233	373.334	712.065	-31.5825	278.702	719.027	-53.9573	177.065	688.032	-37.0298	666.297	672.43	393.347	398.602	699.565	425.147	390.077	709.714	351.892	295.894	720.126	385.205	201.515	690.084	376.431
732	7.31	501.548	1239.06	152.493	546.063	1237.96	79.2477	554.644	1233.59	216.893	625.832	1040.68	-16.755	637.001	1048.18	297.274	563.802	1013.11	153.503	639.916	673.053	-120.573	363.994	701.536	-106.232	373.321	712.05	-31.5845	278.724	719.013	-53.969	177.065	688.009	-37.0465	666.308	672.421	393.371	398.593	699.552	425.152	390.067	709.712	351.917	295.936	720.086	385.221	201.535	690.066	376.43
733	7.32	501.635	1239.06	152.438	546.112	1237.95	79.2197	554.673	1233.58	216.876	625.848	1040.65	-16.7499	637.006	1048.15	297.266	563.833	1013.08	153.494	639.96	673.046	-120.562	363.986	701.533	-106.236	373.298	712.047	-31.5675	278.72	719.001	-53.9815	177.043	687.975	-37.0398	666.258	672.38	393.364	398.577	699.559	425.154	390.018	709.721	351.923	295.936	720.07	385.218	201.534	690.048	376.428
734	7.33	501.617	1239.1	152.414	546.172	1237.97	79.1895	554.695	1233.57	216.861	625.887	1040.65	-16.7652	637.009	1048.15	297.258	563.839	1013.1	153.488	639.986	673.012	-120.528	363.967	701.535	-106.232	373.314	712.058	-31.5738	278.718	719.005	-53.9832	177.042	687.971	-37.0255	666.273	672.372	393.341	398.615	699.581	425.148	390.048	709.733	351.905	295.88	720.086	385.211	201.53	690.054	376.429
735	7.34	501.668	1239.14	152.339	546.2	1238.02	79.1676	554.726	1233.62	216.852	625.924	1040.66	-16.7849	637.007	1048.17	297.255	563.795	1013.14	153.467	639.997	672.977	-120.468	364.001	701.556	-106.242	373.322	712.075	-31.5844	278.71	719.035	-53.9771	177.037	688.018	-37.0219	666.285	672.366	393.359	398.615	699.586	425.14	390.066	709.782	351.92	295.91	720.113	385.194	201.544	690.075	376.424
736	7.35	501.713	1239.19	152.304	546.215	1238.08	79.155	554.739	1233.65	216.818	625.947	1040.68	-16.798	637.024	1048.19	297.249	563.753	1013.19	153.459	639.983	672.955	-120.434	364.008	701.594	-106.239	373.297	712.115	-31.6017	278.69	719.059	-53.9762	177.009	688.068	-37.0371	666.249	672.367	393.345	398.64	699.593	425.136	389.99	709.835	351.907	295.904	720.146	385.181	201.535	690.097	376.422
737	7.36	501.728	1239.25	152.267	546.249	1238.11	79.133	554.718	1233.67	216.769	625.984	1040.68	-16.8262	637.057	1048.21	297.234	563.742	1013.22	153.445	639.996	672.925	-120.414	364.015	701.614	-106.242	373.281	712.126	-31.6082	278.686	719.07	-53.9883	177.02	688.082	-37.0486	666.277	672.388	393.31	398.65	699.62	425.134	389.979	709.858	351.875	295.867	720.183	385.193	201.516	690.12	376.422
738	7.37	501.847	1239.24	152.193	546.331	1238.1	79.0815	554.746	1233.68	216.743	626.017	1040.66	-16.8311	637.091	1048.22	297.224	563.781	1013.22	153.441	640.004	672.879	-120.375	364.012	701.603	-106.247	373.294	712.124	-31.6169	278.723	719.064	-54.0125	177.051	688.079	-37.0793	666.274	672.385	393.299	398.659	699.637	425.137	390.061	709.801	351.849	295.883	720.185	385.175	201.078	690.434	376.424
739	7.38	502.073	1239.21	152.119	546.382	1238.09	79.0606	554.806	1233.66	216.751	626.025	1040.62	-16.8336	637.104	1048.22	297.213	563.826	1013.19	153.441	640.006	672.825	-120.325	364.016	701.581	-106.249	373.284	712.117	-31.6106	278.736	719.053	-54.0126	177.067	688.082	-37.087	666.303	672.376	393.277	398.668	699.63	425.132	390.027	709.781	351.857	295.936	720.16	385.16	200.538	690.819	376.443
740	7.39	502.148	1239.18	152.109	546.397	1238.07	79.0611	554.829	1233.65	216.74	626.025	1040.58	-16.8492	637.115	1048.21	297.212	563.831	1013.15	153.451	640.017	672.779	-120.284	364.002	701.572	-106.242	373.291	712.08	-31.586	278.743	719.043	-53.9999	177.055	688.078	-37.0751	666.309	672.386	393.266	398.662	699.608	425.122	390.041	709.773	351.867	295.908	720.149	385.179	201.276	690.284	376.431
741	7.4	502.186	1239.15	152.094	546.39	1238.05	79.0584	554.837	1233.65	216.714	626.052	1040.57	-16.8453	637.127	1048.19	297.219	563.804	1013.14	153.469	640.023	672.72	-120.25	364.004	701.54	-106.204	373.325	712.053	-31.5724	278.741	719.025	-53.9939	177.07	688.044	-37.0834	666.294	672.377	393.249	398.668	699.593	425.136	390.108	709.76	351.846	295.936	720.119	385.176	201.476	690.133	376.434
742	7.41	502.319	1239.12	152.018	546.479	1238.03	79.0246	554.842	1233.64	216.706	626.106	1040.55	-16.8385	637.168	1048.18	297.205	563.84	1013.12	153.466	640.088	672.703	-120.184	364.035	701.515	-106.193	373.36	712.039	-31.5734	278.745	719.009	-54.0034	177.076	688.01	-37.082	666.303	672.364	393.262	398.646	699.59	425.134	390.147	709.739	351.837	295.993	720.095	385.168	201.539	690.088	376.424
743	7.42	502.411	1239.13	151.972	546.528	1238.02	79.0195	554.827	1233.64	216.692	626.11	1040.54	-16.8525	637.206	1048.18	297.192	563.919	1013.09	153.457	640.142	672.699	-120.124	364.043	701.518	-106.188	373.382	712.034	-31.5608	278.75	719.001	-54.0028	177.133	687.968	-37.108	666.316	672.352	393.263	398.627	699.586	425.134	390.08	709.71	351.843	296.009	720.086	385.171	201.528	690.082	376.422
744	7.43	502.379	1239.15	151.993	546.508	1238.03	79.0274	554.853	1233.65	216.69	626.1	1040.54	-16.8586	637.2	1048.19	297.2	563.934	1013.09	153.461	640.129	672.664	-120.078	364.03	701.548	-106.18	373.335	712.044	-31.5388	278.737	719.005	-53.9962	177.085	687.995	-37.0887	666.32	672.362	393.253	398.639	699.593	425.131	390.093	709.704	351.861	295.98	720.074	385.194	201.53	690.094	376.433
745	7.44	502.335	1239.18	152.005	546.512	1238.05	79.0142	554.905	1233.68	216.682	626.126	1040.53	-16.868	637.218	1048.19	297.204	563.929	1013.1	153.465	640.146	672.635	-120.049	364.034	701.559	-106.185	373.315	712.056	-31.538	278.735	719.018	-53.9843	177.089	688.021	-37.0872	666.294	672.364	393.239	398.68	699.609	425.146	390.051	709.739	351.891	295.983	720.081	385.215	201.538	690.103	376.445
746	7.45	502.384	1239.18	151.96	546.524	1238.04	79.0079	554.883	1233.68	216.633	626.161	1040.54	-16.8564	637.24	1048.19	297.194	563.927	1013.11	153.443	640.2	672.634	-119.994	364.063	701.56	-106.186	373.317	712.067	-31.5398	278.749	719.016	-53.9957	177.087	688.024	-37.0733	666.268	672.354	393.243	398.695	699.601	425.136	390.051	709.79	351.889	295.97	720.096	385.203	201.538	690.098	376.442
747	7.46	502.481	1239.17	151.899	546.534	1238.03	79.0007	554.848	1233.67	216.586	626.189	1040.52	-16.8599	637.281	1048.2	297.191	563.868	1013.12	153.419	640.262	672.642	-119.945	364.068	701.547	-106.189	373.265	712.074	-31.5288	278.754	719.011	-54.0069	177.084	688.032	-37.0652	666.321	672.391	393.237	398.749	699.598	425.121	390.053	709.793	351.868	295.932	720.098	385.208	201.529	690.092	376.428
[truncated: 3 more columns]

## Sheet: Trial01
PathFileType	4	(X/Y/Z)	Trial01.trc
DataRate	CameraRate	NumFrames	NumMarkers	Units	OrigDataRate	OrigDataStartFrame	OrigNumFrames
100	100	969	16	mm	100	1	969
Frame#	Time	l ulna			r finger			r ulna			nasion			l elbow			l should			r hand			r zyg pr			l radius			r radius			r should			sternum			r elbow			l zyg pr			l hand			l finger
		X1	Y1	Z1	X2	Y2	Z2	X3	Y3	Z3	X4	Y4	Z4	X5	Y5	Z5	X6	Y6	Z6	X7	Y7	Z7	X8	Y8	Z8	X9	Y9	Z9	X10	Y10	Z10	X11	Y11	Z11	X12	Y12	Z12	X13	Y13	Z13	X14	Y14	Z14	X15	Y15	Z15	X16	Y16	Z16
1	0	354.788	701.053	429.346	156.65	686.376	-48.2962	342.949	701.548	-118.474	520.74	1241.95	155.944	622.52	670.063	397.217	641.279	1044.32	305.657	259.603	727.121	-69.8678	572.165	1237.95	88.0918	348.703	704.869	356.383	348.575	715.461	-44.3935	633.612	1037.34	-6.57604	570.621	1011.77	159.125	621.004	674	-118.51	564.881	1233.17	226.952	251.905	722.893	386.899	158.826	689.318	368.044
2	0.01	354.82	701.061	429.38	156.582	686.391	-48.236	342.903	701.634	-118.507	520.976	1241.91	156.032	622.537	670.088	397.273	641.371	1044.32	305.702	259.511	727.293	-69.9201	572.253	1237.95	88.1628	347.56	705.487	357.013	348.612	715.656	-44.4789	633.552	1037.35	-6.41806	570.722	1011.68	159.214	620.864	674.197	-118.86	564.456	1233.18	227.2	251.94	722.864	386.918	158.921	689.303	368.019
3	0.02	354.847	701.046	429.406	156.511	686.413	-48.1483	342.85	701.77	-118.55	521.015	1241.93	156.166	622.538	670.097	397.305	641.459	1044.34	305.768	259.39	727.495	-69.9485	572.284	1237.94	88.2526	347.4	705.659	357.211	348.631	715.867	-44.5613	633.475	1037.41	-6.22668	570.71	1011.64	159.288	620.711	674.368	-119.158	563.303	1233.26	227.679	251.986	722.875	386.951	158.949	689.278	368.037
4	0.03	354.883	701.027	429.434	156.368	686.467	-48.0009	342.715	701.907	-118.535	520.837	1242	156.364	622.558	670.116	397.358	641.526	1044.36	305.863	259.209	727.711	-69.9272	572.295	1237.96	88.3779	347.417	705.688	357.308	348.669	716.083	-44.6336	633.376	1037.43	-6.07495	570.628	1011.65	159.39	620.623	674.546	-119.387	562.996	1233.29	227.904	251.963	722.887	386.986	158.944	689.268	368.056
5	0.04	354.891	701.016	429.441	156.264	686.505	-47.8993	342.64	702.06	-118.588	520.71	1242.05	156.505	622.609	670.162	397.386	641.595	1044.38	305.963	259.045	727.933	-69.9061	572.287	1237.97	88.4925	347.5	705.684	357.377	348.705	716.318	-44.7225	633.324	1037.44	-5.93946	570.566	1011.65	159.51	620.524	674.705	-119.58	562.877	1233.3	228.032	251.938	722.892	387	158.98	689.254	368.063
6	0.05	354.877	701.006	429.447	156.275	686.502	-47.9085	342.562	702.212	-118.661	520.665	1242	156.597	622.649	670.216	397.43	641.684	1044.39	306.028	258.939	728.162	-69.9454	572.293	1237.93	88.5548	347.527	705.698	357.392	348.779	716.557	-44.8316	633.23	1037.46	-5.81152	570.659	1011.57	159.58	620.387	674.839	-119.716	562.865	1233.36	228.134	251.929	722.867	386.96	159.02	689.228	368.049
7	0.06	354.845	701.015	429.451	156.216	686.512	-47.8854	342.465	702.375	-118.739	520.713	1241.94	156.644	622.608	670.222	397.463	641.748	1044.39	306.089	258.574	728.198	-69.9719	572.325	1237.88	88.6015	347.43	705.706	357.367	348.778	716.839	-44.9147	633.147	1037.48	-5.65572	570.791	1011.47	159.629	620.24	674.951	-119.832	562.792	1233.38	228.248	251.919	722.831	386.915	159.003	689.236	368.03
8	0.07	354.824	701.05	429.445	156.123	686.567	-47.8074	342.359	702.574	-118.77	520.591	1241.94	156.767	622.609	670.254	397.469	641.818	1044.42	306.166	257.807	727.979	-69.9232	572.291	1237.84	88.7066	347.426	705.752	357.369	348.741	717.204	-44.9848	633.047	1037.5	-5.51244	570.733	1011.45	159.711	620.11	675.068	-119.912	562.812	1233.38	228.375	251.888	722.822	386.916	158.914	689.29	368.018
9	0.08	354.834	701.093	429.435	156.039	686.692	-47.7084	342.23	702.845	-118.776	520.39	1241.98	156.932	622.614	670.284	397.48	641.88	1044.45	306.244	257.439	728.207	-69.9222	572.244	1237.82	88.8149	347.433	705.796	357.38	348.681	717.656	-45.0333	633.004	1037.57	-5.37578	570.576	1011.5	159.835	619.971	675.213	-119.99	562.814	1233.39	228.47	251.878	722.847	386.936	158.883	689.334	367.999
10	0.09	354.797	701.117	429.438	155.9	686.94	-47.6007	342.129	703.195	-118.809	520.288	1241.99	157.06	622.581	670.286	397.481	641.929	1044.47	306.32	257.51	728.806	-70.007	572.214	1237.8	88.9207	347.387	705.795	357.362	348.519	718.183	-45.0848	632.951	1037.61	-5.21499	570.509	1011.52	159.934	619.766	675.354	-120.057	563.353	1233.39	228.374	251.881	722.895	386.956	158.847	689.36	367.992
11	0.1	354.778	701.111	429.462	155.751	687.29	-47.536	342.003	703.627	-118.862	520.237	1241.97	157.175	622.523	670.241	397.464	641.95	1044.47	306.393	257.943	729.754	-70.1712	572.142	1237.76	89.0403	347.243	705.851	357.382	348.246	718.785	-45.112	632.892	1037.65	-5.06928	570.386	1011.52	160.033	619.535	675.521	-120.136	564.045	1233.3	228.227	251.839	722.913	386.959	158.817	689.377	367.981
12	0.11	354.766	701.092	429.466	155.636	687.726	-47.4592	341.815	704.127	-118.894	520.186	1241.94	157.295	622.506	670.207	397.466	641.998	1044.45	306.469	257.955	730.378	-70.3016	572.064	1237.73	89.1583	347.254	705.787	357.404	347.999	719.425	-45.0936	632.878	1037.71	-4.87196	570.331	1011.5	160.146	619.332	675.705	-120.243	563.62	1233.26	228.457	251.865	722.907	386.968	158.834	689.37	367.979
13	0.12	354.787	701.068	429.481	155.554	688.19	-47.389	341.635	704.657	-118.89	520.128	1241.89	157.441	622.543	670.156	397.481	642.07	1044.42	306.561	257.838	731.002	-70.4037	572.024	1237.67	89.2916	347.437	705.715	357.417	347.866	720.086	-45.1073	632.909	1037.77	-4.68279	570.32	1011.45	160.266	619.152	675.944	-120.354	564.074	1233.16	228.431	251.922	722.903	386.998	158.904	689.334	368.006
14	0.13	354.858	701.026	429.495	155.433	688.703	-47.3279	341.369	705.192	-118.867	520.17	1241.82	157.584	622.577	670.108	397.492	642.101	1044.36	306.649	257.616	731.622	-70.4675	571.982	1237.61	89.43	347.586	705.689	357.441	347.807	720.708	-45.1756	632.911	1037.83	-4.49583	570.294	1011.4	160.395	618.949	676.211	-120.453	563.595	1233.09	228.721	251.933	722.867	387.003	158.96	689.296	368.035
15	0.14	354.879	700.974	429.502	155.298	689.214	-47.3347	341.051	705.74	-118.846	520.274	1241.7	157.731	622.566	670.038	397.511	642.131	1044.28	306.739	257.339	732.24	-70.5239	571.92	1237.55	89.5863	347.523	705.691	357.438	347.751	721.35	-45.2965	632.89	1037.91	-4.29902	570.321	1011.31	160.497	618.694	676.483	-120.565	564.633	1232.92	228.487	251.912	722.83	387.006	159.015	689.254	368.053
16	0.15	354.863	700.937	429.503	155.182	689.778	-47.3354	340.809	706.313	-118.854	520.348	1241.6	157.884	622.558	669.978	397.516	642.174	1044.23	306.825	256.957	732.894	-70.5396	571.883	1237.5	89.7311	347.535	705.675	357.46	347.641	722.083	-45.4113	632.907	1038.02	-4.10416	570.384	1011.23	160.582	618.446	676.758	-120.67	564.833	1232.82	228.57	251.93	722.812	386.992	159.046	689.235	368.041
17	0.16	354.888	700.937	429.508	155.021	690.505	-47.2883	340.475	706.937	-118.885	520.369	1241.51	158.065	622.596	669.955	397.511	642.231	1044.18	306.917	256.558	733.643	-70.4829	571.855	1237.48	89.9239	347.561	705.675	357.483	347.393	722.92	-45.4494	632.931	1038.14	-3.8998	570.353	1011.24	160.706	618.142	677.051	-120.796	564.811	1232.8	228.745	251.951	722.823	386.993	159.038	689.235	368.028
18	0.17	354.918	700.953	429.519	154.638	691.465	-47.131	339.96	707.603	-118.842	520.322	1241.48	158.245	622.605	669.928	397.525	642.271	1044.14	307.018	256.205	734.503	-70.4785	571.803	1237.47	90.1214	347.578	705.713	357.469	347.013	723.841	-45.4069	632.899	1038.27	-3.70231	570.256	1011.27	160.849	617.65	677.337	-120.969	564.82	1232.77	228.915	251.94	722.844	387.014	159.001	689.274	368.044
19	0.18	354.916	700.961	429.508	154.17	692.583	-46.9511	339.501	708.324	-118.832	520.297	1241.42	158.404	622.555	669.854	397.542	642.31	1044.1	307.109	255.824	735.47	-70.5117	571.719	1237.49	90.3109	346.954	706.226	357.199	346.625	724.725	-45.3481	632.874	1038.4	-3.53152	570.151	1011.3	160.988	616.964	677.565	-121.22	564.734	1232.74	229.115	251.953	722.871	386.995	158.998	689.299	368.02
20	0.19	354.869	700.973	429.51	153.846	693.763	-46.7106	339.13	709.1	-118.756	520.298	1241.35	158.559	622.561	669.792	397.551	642.378	1044.03	307.183	255.389	736.496	-70.4996	571.652	1237.5	90.4825	346.087	706.91	356.848	346.26	725.638	-45.3292	632.867	1038.54	-3.36182	570.078	1011.29	161.098	616.253	677.771	-121.516	564.584	1232.68	229.302	251.958	722.87	386.962	158.962	689.327	367.989
21	0.2	354.844	700.972	429.516	153.559	695.02	-46.3203	338.679	709.987	-118.591	520.294	1241.29	158.744	622.62	669.753	397.536	642.444	1043.97	307.259	254.866	737.547	-70.3624	571.618	1237.49	90.7034	347.181	706.13	357.342	345.811	726.721	-45.3497	632.919	1038.66	-3.2099	570.032	1011.3	161.247	615.556	678.028	-121.795	564.527	1232.59	229.505	251.932	722.88	386.976	158.94	689.35	367.984
22	0.21	354.882	700.973	429.516	153.144	696.325	-45.7804	338.09	710.934	-118.451	520.27	1241.22	158.926	622.625	669.674	397.531	642.516	1043.88	307.353	254.265	738.651	-70.1023	571.537	1237.48	90.9255	347.462	705.922	357.479	345.301	727.95	-45.2876	632.988	1038.79	-3.06356	569.996	1011.32	161.399	614.899	678.308	-122.017	564.013	1232.57	229.873	251.902	722.893	386.998	158.95	689.339	367.994
23	0.22	354.903	700.982	429.524	152.657	697.621	-45.1868	337.431	711.893	-118.386	520.364	1241.09	159.058	622.634	669.566	397.53	642.586	1043.77	307.441	253.59	739.863	-69.7997	571.478	1237.44	91.1001	346.879	706.351	357.219	344.857	729.085	-45.1075	633.052	1038.92	-2.91866	570.029	1011.26	161.509	614.191	678.612	-122.178	562.894	1232.6	230.449	251.904	722.878	387.004	158.971	689.334	367.981
24	0.23	354.913	700.963	429.53	152.124	699.103	-44.3774	336.85	712.871	-118.224	520.438	1240.94	159.177	622.613	669.452	397.522	642.701	1043.65	307.519	252.928	741.093	-69.3661	571.481	1237.37	91.2963	346.179	706.953	356.88	344.354	730.229	-44.8469	633.133	1039.06	-2.75825	570.121	1011.19	161.633	613.437	678.969	-122.321	562.579	1232.56	230.751	251.945	722.859	386.982	159.044	689.299	367.978
25	0.24	354.922	700.937	429.545	151.559	700.624	-43.4825	336.249	714.051	-117.844	520.407	1240.83	159.346	622.618	669.364	397.496	642.846	1043.54	307.59	252.336	742.397	-68.8153	571.425	1237.32	91.5229	347.23	706.116	357.409	343.791	731.477	-44.5573	633.229	1039.18	-2.58455	570.238	1011.12	161.808	612.657	679.404	-122.506	562.458	1232.5	230.968	251.957	722.838	386.992	159.068	689.287	367.993
26	0.25	354.948	700.919	429.563	150.83	702.263	-42.4354	335.406	715.468	-117.371	520.442	1240.72	159.524	622.654	669.281	397.464	643.01	1043.43	307.675	251.672	743.93	-68.1976	571.361	1237.3	91.7629	347.506	705.904	357.563	343.239	732.85	-44.2143	633.333	1039.31	-2.40435	570.274	1011.09	162.003	611.715	679.812	-122.792	562.486	1232.45	231.22	251.971	722.833	387.006	159.069	689.292	368.006
27	0.26	354.943	700.892	429.593	150.2	704.101	-41.4008	334.517	716.796	-116.864	520.474	1240.63	159.722	622.608	669.16	397.451	643.14	1043.33	307.774	250.985	745.548	-67.5143	571.292	1237.28	91.9919	347.582	705.888	357.625	342.633	734.253	-43.7599	633.352	1039.43	-2.22833	570.272	1011.07	162.225	610.607	680.111	-123.144	562.533	1232.37	231.486	251.961	722.839	387.035	159.088	689.282	368.016
28	0.27	354.922	700.888	429.618	149.644	706.046	-40.4695	333.577	718.246	-116.294	520.407	1240.55	159.956	622.566	669.09	397.445	643.268	1043.23	307.856	250.36	747.178	-66.8289	571.209	1237.26	92.2207	347.54	705.858	357.612	342.071	735.633	-43.334	633.295	1039.53	-2.05578	570.259	1011.05	162.443	609.441	680.335	-123.453	562.552	1232.28	231.762	251.975	722.871	387.068	159.059	689.299	368.031
29	0.28	354.93	700.874	429.611	149.032	708.33	-39.4128	332.482	719.826	-115.767	520.241	1240.46	160.243	622.589	669.01	397.393	643.399	1043.15	307.938	249.651	749.015	-66.0609	571.165	1237.25	92.4473	347.526	705.857	357.639	341.569	737.158	-42.9511	633.28	1039.64	-1.90949	570.244	1011.04	162.658	608.317	680.704	-123.701	562.559	1232.2	232.037	251.998	722.901	387.091	159.042	689.328	368.057
30	0.29	354.939	700.875	429.599	148.361	710.599	-38.2578	331.498	721.396	-115.311	519.982	1240.4	160.602	622.657	668.903	397.34	643.528	1043.08	308.015	248.945	750.956	-65.2732	571.141	1237.22	92.653	347.581	705.887	357.629	341.046	738.871	-42.5549	633.278	1039.77	-1.75264	570.277	1011.01	162.844	607.294	681.265	-123.986	563.042	1232.11	232.074	252.036	722.919	387.109	159.05	689.34	368.062
31	0.3	354.951	700.874	429.607	147.556	713.146	-37.0754	330.671	723.188	-114.937	519.739	1240.3	160.94	622.646	668.791	397.312	643.664	1042.99	308.079	248.177	752.997	-64.4842	571.089	1237.18	92.8345	347.665	705.88	357.638	340.442	740.604	-42.0773	633.206	1039.9	-1.57248	570.291	1010.96	162.996	606.268	681.805	-124.268	564.154	1231.97	231.846	252.035	722.899	387.091	159.057	689.339	368.042
32	0.31	354.991	700.852	429.616	146.719	715.757	-35.8963	329.854	725.014	-114.467	519.531	1240.2	161.237	622.63	668.67	397.253	643.8	1042.91	308.143	247.281	755.231	-63.7183	571.024	1237.15	93.0204	347.763	705.852	357.625	339.782	742.502	-41.5372	633.116	1040.08	-1.38006	570.268	1010.91	163.137	604.948	682.205	-124.56	564.418	1231.88	231.943	252.047	722.863	387.055	159.092	689.332	367.994
33	0.32	355.025	700.858	429.592	145.979	718.498	-34.6594	328.892	726.876	-113.827	519.223	1240.17	161.576	622.664	668.611	397.209	643.945	1042.84	308.217	246.291	757.57	-62.8894	570.983	1237.13	93.2479	347.852	705.871	357.592	339.058	744.61	-40.9746	633.06	1040.26	-1.18966	570.334	1010.86	163.287	603.578	682.628	-124.904	564.501	1231.8	232.122	252.047	722.824	387.026	159.13	689.329	367.977
34	0.33	355.069	700.851	429.599	145.298	721.561	-33.3806	327.867	728.941	-113.033	519.124	1240.16	161.881	622.7	668.54	397.166	644.073	1042.79	308.291	245.577	760.03	-62.0101	570.903	1237.15	93.4919	347.839	705.851	357.555	338.335	746.74	-40.424	632.994	1040.41	-0.98051	570.35	1010.82	163.473	602.313	683.214	-125.271	564.5	1231.74	232.339	252.049	722.828	387.035	159.153	689.334	367.971
35	0.34	355.1	700.822	429.621	144.61	724.742	-31.9688	326.635	731.161	-112.378	519.102	1240.11	162.175	622.656	668.451	397.133	644.149	1042.73	308.375	244.646	762.691	-61.0739	570.792	1237.17	93.733	347.831	705.835	357.575	337.546	749.099	-39.9353	632.876	1040.62	-0.69846	570.326	1010.83	163.657	600.979	683.877	-125.54	564.39	1231.67	232.576	252.035	722.851	387.088	159.134	689.321	367.986
36	0.35	355.103	700.801	429.622	143.855	728.037	-30.5343	325.409	733.517	-111.704	519.136	1240.05	162.445	622.619	668.372	397.107	644.224	1042.68	308.465	243.806	765.477	-60.1822	570.632	1237.17	94.0083	347.872	705.812	357.565	336.806	751.525	-39.4442	632.779	1040.82	-0.39477	570.302	1010.83	163.825	599.454	684.411	-125.803	564.28	1231.6	232.825	252.02	722.849	387.111	159.135	689.321	368
37	0.36	355.084	700.797	429.619	143.029	731.531	-29.0319	324.119	736	-111.043	519.185	1239.99	162.738	622.612	668.307	397.046	644.326	1042.63	308.566	243.005	768.395	-59.2544	570.518	1237.16	94.2984	347.95	705.827	357.558	335.983	754.21	-38.7982	632.74	1041.05	-0.10873	570.333	1010.8	163.976	597.836	684.971	-126.255	564.244	1231.54	233.051	252.054	722.862	387.131	159.164	689.312	368.02
38	0.37	355.05	700.789	429.636	142.2	735.246	-27.4123	323.092	738.699	-110.269	519.224	1239.94	163	622.609	668.262	396.993	644.428	1042.58	308.684	242.127	771.507	-58.2678	570.384	1237.16	94.6151	347.974	705.813	357.588	335.147	756.989	-38.0243	632.744	1041.31	0.18274	570.363	1010.78	164.116	596.099	685.658	-126.659	564.143	1231.52	233.309	252.086	722.879	387.152	159.226	689.289	368.047
39	0.38	355.026	700.772	429.648	141.508	739.167	-25.8113	322.144	741.383	-109.585	519.244	1239.87	163.199	622.563	668.175	396.975	644.477	1042.49	308.811	241.27	774.847	-57.2071	570.228	1237.17	94.9407	347.969	705.839	357.612	334.503	759.873	-37.4298	632.765	1041.56	0.51381	570.384	1010.77	164.254	594.457	686.387	-126.919	563.989	1231.47	233.55	252.054	722.893	387.18	159.214	689.293	368.051
40	0.39	355.046	700.751	429.672	140.741	743.304	-24.1415	320.986	744.357	-108.916	519.286	1239.8	163.37	622.559	668.091	396.967	644.537	1042.41	308.94	240.463	778.378	-56.0994	570.104	1237.16	95.2368	347.931	705.869	357.613	333.711	762.969	-36.7879	632.792	1041.8	0.79988	570.398	1010.72	164.376	592.715	687.113	-127.369	563.894	1231.44	233.791	252.054	722.889	387.19	159.188	689.297	368.046
41	0.4	355.092	700.758	429.686	139.977	747.663	-22.3136	319.626	747.49	-108.181	519.353	1239.74	163.537	622.606	668.04	396.95	644.647	1042.33	309.063	239.649	782.064	-54.9876	570.048	1237.14	95.4814	347.967	705.885	357.608	332.875	766.166	-36.1309	632.865	1042.08	1.12623	570.477	1010.67	164.479	590.688	687.872	-127.915	563.846	1231.4	234.035	252.066	722.876	387.159	159.221	689.293	368.033
42	0.41	355.11	700.761	429.665	139.205	752.231	-20.4909	318.261	750.544	-107.255	519.383	1239.71	163.734	622.622	667.974	396.935	644.762	1042.26	309.185	238.853	785.934	-53.8928	570.001	1237.14	95.7333	348.057	705.887	357.621	332.236	769.442	-35.5336	632.983	1042.34	1.46291	570.492	1010.64	164.633	588.72	688.525	-128.684	563.912	1231.32	234.299	252.073	722.851	387.138	159.217	689.319	368.025
43	0.42	355.122	700.743	429.671	138.423	757.043	-18.5747	316.856	753.81	-106.213	519.381	1239.64	163.917	622.606	667.89	396.952	644.837	1042.19	309.338	238.052	790.042	-52.6965	569.939	1237.14	95.9865	348.134	705.898	357.631	331.573	772.972	-34.9144	633.1	1042.63	1.81059	570.397	1010.67	164.819	586.633	688.941	-129.811	563.882	1231.22	234.614	252.064	722.841	387.138	159.197	689.323	368.004
44	0.43	355.136	700.729	429.687	137.9	761.927	-16.7333	315.51	757.389	-105.343	519.335	1239.57	164.105	622.559	667.787	396.955	644.908	1042.12	309.485	237.336	794.364	-51.5243	569.875	1237.15	96.2068	348.075	705.887	357.619	330.789	776.709	-34.1908	633.249	1042.92	2.15628	570.333	1010.72	165.001	584.524	689.728	-130.686	563.318	1231.18	235.05	252.067	722.853	387.14	159.181	689.33	367.984
45	0.44	355.14	700.717	429.681	137.392	767.165	-14.791	314.339	761.184	-104.529	519.28	1239.52	164.324	622.558	667.703	396.962	644.981	1042.06	309.636	236.546	798.883	-50.3434	569.876	1237.16	96.3981	348.075	705.871	357.625	330.029	780.545	-33.4078	633.378	1043.18	2.49954	570.312	1010.72	165.203	582.417	690.66	-131.39	562.707	1231.14	235.517	252.079	722.89	387.164	159.182	689.34	367.988
46	0.45	355.145	700.725	429.692	136.887	772.695	-12.6879	313.159	765.045	-103.637	519.122	1239.49	164.596	622.613	667.68	396.995	645.045	1042	309.811	235.791	803.558	-49.047	569.917	1237.14	96.607	348.081	705.888	357.666	329.355	784.502	-32.6332	633.496	1043.41	2.8263	570.227	1010.77	165.42	580.19	691.71	-131.902	563.705	1230.99	235.473	252.061	722.917	387.193	159.183	689.335	368.021
47	0.46	355.137	700.7	429.708	136.306	778.273	-10.6047	311.843	768.898	-102.716	518.843	1239.45	164.912	622.644	667.636	397.061	645.086	1041.95	309.99	235.164	808.276	-47.81	569.935	1237.09	96.8171	348.108	705.894	357.728	328.704	788.6	-31.922	633.623	1043.66	3.16955	570.178	1010.79	165.635	577.751	692.794	-132.557	563.983	1230.88	235.615	252.06	722.903	387.214	159.153	689.342	368.037
48	0.47	355.115	700.686	429.732	135.689	784.122	-8.37866	310.498	772.871	-101.913	518.763	1239.37	165.187	622.581	667.547	397.098	645.145	1041.88	310.143	234.554	813.173	-46.5078	569.962	1237.02	97.0218	348.115	705.895	357.791	328.109	792.825	-31.2187	633.796	1043.94	3.5396	570.177	1010.75	165.834	575.373	693.948	-133.256	564.007	1230.83	235.8	252.05	722.875	387.2	159.165	689.349	368.022
49	0.48	355.089	700.681	429.748	135.181	790.177	-6.01072	309.233	777.065	-100.976	518.684	1239.25	165.461	622.581	667.504	397.116	645.258	1041.8	310.288	233.931	818.257	-45.1452	569.97	1236.94	97.252	348.18	705.894	357.809	327.566	797.166	-30.4466	634.058	1044.25	3.92179	570.331	1010.65	166.007	572.928	695.193	-133.903	564.037	1230.79	235.982	252.067	722.855	387.18	159.24	689.318	368.023
50	0.49	355.123	700.678	429.767	134.791	796.46	-3.69749	307.921	781.385	-99.767	518.446	1239.17	165.792	622.64	667.446	397.159	645.371	1041.71	310.445	233.27	823.517	-43.7116	570.008	1236.85	97.5024	348.191	705.907	357.852	326.979	801.614	-29.538	634.379	1044.55	4.3425	570.417	1010.58	166.225	570.373	696.437	-134.604	564.017	1230.74	236.16	252.071	722.829	387.176	159.278	689.285	368.031
51	0.5	355.12	700.654	429.798	134.595	802.814	-1.35004	306.651	785.862	-98.7634	518.249	1239.11	166.087	622.658	667.394	397.232	645.451	1041.63	310.595	232.716	828.889	-42.2669	569.996	1236.79	97.7254	348.173	705.913	357.876	326.423	806.208	-28.6938	634.693	1044.81	4.70609	570.481	1010.56	166.443	567.886	697.866	-135.225	563.948	1230.63	236.355	252.055	722.817	387.189	159.296	689.294	368.031
52	0.51	355.096	700.641	429.806	134.515	809.554	1.12503	305.42	790.475	-97.7326	518.177	1239.03	166.308	622.637	667.309	397.307	645.526	1041.55	310.739	232.273	834.431	-40.8456	569.961	1236.74	97.9325	348.167	705.923	357.895	326.076	810.989	-27.882	635.052	1045.07	5.01542	570.544	1010.58	166.647	565.287	699.314	-135.886	563.834	1230.54	236.539	252.079	722.827	387.183	159.3	689.304	368.009
53	0.52	355.065	700.633	429.807	134.378	816.409	3.64126	304.222	795.249	-96.4916	517.983	1238.96	166.522	622.645	667.241	397.352	645.616	1041.48	310.887	231.919	840.173	-39.312	569.877	1236.71	98.163	348.133	705.922	357.912	325.889	815.95	-27.0483	635.47	1045.37	5.33877	570.548	1010.61	166.905	562.697	700.86	-136.636	563.712	1230.48	236.736	252.114	722.88	387.196	159.281	689.325	368.019
54	0.53	355.055	700.632	429.84	134.472	823.274	6.16713	303.093	800.232	-95.3536	517.895	1238.91	166.706	622.639	667.152	397.414	645.714	1041.4	311.03	231.78	846.069	-37.7822	569.749	1236.68	98.3858	348.092	705.929	357.961	325.799	820.912	-26.3564	635.91	1045.7	5.70384	570.586	1010.63	167.148	560.034	702.425	-137.471	563.493	1230.43	236.935	252.128	722.91	387.219	159.25	689.342	368.034
55	0.54	355.062	700.609	429.856	134.71	830.406	8.78289	301.861	805.455	-94.4009	517.904	1238.82	166.851	622.625	667.055	397.526	645.78	1041.35	311.158	231.853	852.222	-35.837	569.697	1236.64	98.5376	348.178	705.894	358	325.884	825.844	-25.8244	636.315	1046.02	6.09621	570.696	1010.61	167.334	557.242	703.965	-138.253	563.406	1230.37	237.115	252.122	722.914	387.218	159.281	689.335	368.005
56	0.55	355.065	700.611	429.86	135.128	837.696	11.5273	300.705	810.684	-93.537	517.955	1238.7	166.944	622.577	666.934	397.61	645.859	1041.26	311.269	232.142	858.826	-33.2174	569.681	1236.6	98.665	348.21	705.89	358.026	325.899	830.919	-25.1843	636.606	1046.31	6.46128	570.853	1010.57	167.477	554.319	705.53	-138.952	563.277	1230.32	237.304	252.091	722.882	387.201	159.308	689.333	367.973
57	0.56	355.069	700.61	429.883	135.527	845.126	14.2732	300.212	815.499	-92.0946	517.999	1238.61	167.035	622.579	666.81	397.67	646.03	1041.04	311.41	231.087	865.752	-31.6257	569.62	1236.58	98.8124	348.173	705.901	358.034	325.672	836.052	-24.319	636.853	1046.59	6.79901	570.934	1010.54	167.641	551.3	707.179	-139.693	563.224	1230.25	237.482	252.082	722.859	387.181	159.313	689.335	367.973
58	0.57	355.067	700.598	429.921	135.78	852.747	17.0783	299.301	820.623	-90.6001	517.987	1238.52	167.145	622.587	666.687	397.743	646.144	1040.89	311.532	228.594	873.361	-30.3918	569.537	1236.56	98.9723	348.257	705.813	358.051	325.448	841.377	-23.2516	637.084	1046.92	7.1622	570.99	1010.55	167.812	548.435	709.017	-140.349	563.132	1230.18	237.664	252.094	722.851	387.186	159.279	689.36	367.982
59	0.58	355.113	700.6	429.954	136.409	860.317	20.0907	298.316	826.065	-89.181	517.954	1238.45	167.26	622.539	666.558	397.836	646.246	1040.77	311.629	229.312	879.541	-28.6191	569.484	1236.54	99.1147	348.315	705.78	358.079	325.496	847.176	-22.1925	637.299	1047.31	7.60222	571.008	1010.6	168	545.498	710.822	-141.234	563.05	1230.09	237.87	252.102	722.866	387.189	159.272	689.364	367.971
60	0.59	355.105	700.571	429.944	137.228	868.021	23.1673	297.573	831.598	-87.7632	518	1238.34	167.352	622.495	666.398	397.912	646.343	1040.65	311.715	231.461	885.205	-26.5605	569.439	1236.5	99.2466	348.302	705.81	358.087	325.756	852.439	-21.2714	637.571	1047.64	8.05386	571.009	1010.63	168.182	542.629	712.746	-142.06	562.883	1230.04	238.033	252.102	722.876	387.195	159.307	689.338	367.977
61	0.6	355.081	700.527	429.948	138.4	875.745	26.3346	296.833	837.148	-86.2929	518.019	1238.23	167.436	622.466	666.263	397.964	646.442	1040.55	311.803	231.65	892.005	-24.8135	569.407	1236.46	99.3646	348.341	705.812	358.079	326.122	857.926	-20.2249	637.875	1047.97	8.48466	571.025	1010.62	168.346	539.68	714.792	-142.857	562.766	1229.93	238.161	252.097	722.864	387.223	159.282	689.319	367.995
62	0.61	355.072	700.504	429.974	139.645	883.638	29.6846	296.288	842.782	-84.7439	518.07	1238.12	167.543	622.444	666.15	398.001	646.555	1040.44	311.911	231.374	899.408	-23.2547	569.391	1236.43	99.4899	348.43	705.825	358.145	327.004	864.033	-19.2101	638.177	1048.28	8.91912	571.082	1010.62	168.511	536.653	716.818	-143.523	562.629	1229.82	238.308	252.127	722.852	387.256	159.352	689.294	368.018
63	0.62	355.058	700.48	430.006	141.187	891.527	33.0279	295.863	848.467	-83.1696	518.101	1238.04	167.639	622.424	666.012	398.031	646.643	1040.32	312.02	233.711	905.513	-21.5676	569.343	1236.38	99.6141	348.531	705.812	358.224	327.367	869.351	-18.1878	638.476	1048.61	9.38798	571.172	1010.61	168.668	533.547	718.788	-144.188	562.466	1229.76	238.423	252.185	722.845	387.282	159.394	689.279	368.038
64	0.63	355.046	700.458	430.032	142.949	899.515	36.4741	295.386	854.135	-81.5787	518.102	1237.95	167.691	622.377	665.869	398.042	646.749	1040.22	312.12	235.264	911.89	-19.495	569.302	1236.31	99.6859	348.556	705.773	358.225	327.555	874.888	-16.9163	638.905	1048.99	9.84308	571.204	1010.6	168.823	530.3	720.781	-144.93	562.377	1229.68	238.493	252.152	722.832	387.266	159.365	689.289	368.051
65	0.64	355.039	700.463	430.025	144.881	907.498	40.0475	294.946	859.864	-79.9192	518.103	1237.87	167.692	622.354	665.754	398.057	646.859	1040.12	312.205	236.497	918.61	-17.2982	569.297	1236.26	99.7346	348.456	705.784	358.194	328.969	881.258	-16.0775	639.364	1049.39	10.2362	571.208	1010.63	168.961	527.367	723.017	-145.551	562.285	1229.68	238.55	252.121	722.816	387.241	159.353	689.307	368.022
66	0.65	355.047	700.485	430.021	146.974	915.464	43.6265	294.679	865.543	-78.1193	518.079	1237.84	167.725	622.359	665.683	398.085	646.98	1040.04	312.306	238.402	924.898	-15.0976	569.309	1236.25	99.7971	348.41	705.818	358.207	329.897	886.77	-15.0809	639.746	1049.76	10.5983	571.232	1010.69	169.096	524.356	725.29	-146.234	562.196	1229.7	238.594	252.102	722.842	387.241	159.345	689.337	368.002
67	0.66	355.053	700.514	430.035	149.27	923.58	47.0888	294.505	871.208	-76.4125	518.058	1237.83	167.765	622.345	665.587	398.094	647.086	1039.98	312.422	239.944	931.61	-13.0468	569.281	1236.24	99.8617	348.31	705.856	358.2	330.392	892.098	-13.8318	640.054	1050.1	10.9836	571.208	1010.77	169.262	521.218	727.482	-146.887	562.166	1229.71	238.652	252.105	722.884	387.265	159.324	689.364	368.002
68	0.67	355.061	700.505	430.033	151.829	931.79	50.6127	294.439	876.984	-74.5548	518.03	1237.77	167.765	622.294	665.475	398.074	647.156	1039.9	312.513	241.642	938.485	-11.0385	569.226	1236.2	99.9108	348.27	705.87	358.167	331.877	897.923	-12.9074	640.288	1050.41	11.3765	571.157	1010.83	169.411	518.116	729.808	-147.405	561.545	1229.75	238.859	252.073	722.894	387.266	159.288	689.379	368.001
69	0.68	355.039	700.492	430.016	154.483	940.025	54.3245	294.487	882.773	-72.7246	517.983	1237.73	167.718	622.289	665.351	398.064	647.271	1039.81	312.601	243.444	945.347	-9.06645	569.221	1236.16	99.9209	348.294	705.865	358.126	333.629	903.871	-11.9273	640.571	1050.7	11.7514	571.213	1010.84	169.522	515.053	732.135	-147.892	560.266	1229.85	239.271	252.086	722.884	387.243	159.29	689.378	367.986
70	0.69	355.059	700.465	430.019	157.383	948.264	58.0415	294.714	888.533	-70.8364	517.919	1237.7	167.715	622.328	665.23	398.053	647.412	1039.71	312.707	245.356	952.184	-7.01908	569.245	1236.11	99.9394	348.261	705.879	358.134	335.666	909.83	-11.0595	640.948	1050.98	12.1417	571.285	1010.83	169.646	512.143	734.375	-148.285	559.925	1229.86	239.389	252.13	722.874	387.263	159.342	689.36	367.984
71	0.7	355.066	700.437	430.052	160.363	956.425	61.7266	294.961	894.253	-68.8514	517.903	1237.65	167.739	622.358	665.1	398.046	647.483	1039.62	312.821	247.449	959.007	-4.9379	569.251	1236.05	99.9887	348.298	705.872	358.174	337.891	915.785	-10.2003	641.32	1051.26	12.5695	571.295	1010.85	169.818	509.351	736.666	-148.729	560.284	1229.79	239.273	252.155	722.878	387.297	159.341	689.347	368.022
72	0.71	355.084	700.399	430.054	163.629	964.437	65.4366	295.291	899.921	-66.9403	517.863	1237.58	167.776	622.348	664.996	398.015	647.552	1039.55	312.926	249.693	965.82	-2.8235	569.2	1235.98	100.039	348.419	705.848	358.205	340.446	921.764	-9.34062	641.692	1051.55	12.9995	571.316	1010.84	169.975	506.605	738.976	-149.152	560.832	1229.73	239.088	252.15	722.879	387.313	159.369	689.322	368.053
73	0.72	355.111	700.379	430.044	167.101	972.523	69.1073	295.565	905.815	-65.1412	517.904	1237.49	167.748	622.361	664.901	397.978	647.616	1039.46	312.993	252.14	972.54	-0.72134	569.21	1235.89	100.068	348.476	705.827	358.192	342.074	925.712	-8.55352	642.017	1051.88	13.4485	571.404	1010.8	170.057	503.843	741.29	-149.623	559.852	1229.82	239.386	252.137	722.852	387.298	159.364	689.313	368.043
74	0.73	355.14	700.377	430.038	170.725	980.442	72.859	295.228	911.998	-63.608	517.945	1237.43	167.707	622.416	664.83	397.943	647.706	1039.39	313.046	254.709	979.188	1.28122	569.28	1235.8	100.038	348.491	705.818	358.177				642.368	1052.23	13.8767	571.496	1010.78	170.133	500.635	743.717	-149.829	559.631	1229.81	239.469	252.126	722.802	387.257	159.403	689.306	368.032
75	0.74	355.114	700.389	430.047	174.544	988.424	76.6327	295.283	917.823	-61.5935	517.92	1237.39	167.693	622.425	664.764	397.929	647.782	1039.35	313.106	257.313	985.713	3.47684	569.284	1235.74	100.031	348.542	705.802	358.193	343.572	940.889	-3.95411	642.762	1052.55	14.2393	571.615	1010.74	170.223	496.791	745.946	-149.531	560.104	1229.75	239.324	252.138	722.783	387.243	159.435	689.301	368.034
76	0.75	355.131	700.387	430.04	178.509	996.344	80.3213	296.275	923.314	-59.5276	517.865	1237.38	167.687	622.414	664.719	397.931	647.813	1039.31	313.144	259.736	992.215	6.03318	569.247	1235.71	100.035	348.555	705.801	358.177	344.558	944.222	-2.60717	643.193	1052.87	14.6079	571.658	1010.75	170.304	493.737	748.355	-149.545	561.239	1229.67	238.912	252.12	722.798	387.251	159.403	689.315	368.025
77	0.76	355.144	700.384	430.02	182.691	1004.13	83.9391	297.482	928.653	-57.3646	517.828	1237.39	167.659	622.361	664.671	397.928	647.846	1039.28	313.185	262.356	998.658	8.29136	569.271	1235.71	100.03	348.512	705.812	358.161	346.105	948.479	-0.99327	643.597	1053.17	14.9771	571.675	1010.79	170.383	490.795	750.857	-149.517	560.932	1229.73	238.996	252.134	722.815	387.243	159.382	689.339	368.012
78	0.77	355.144	700.394	430.03	187.127	1011.69	87.431	298.628	933.981	-55.1276	517.805	1237.4	167.636	622.356	664.649	397.971	647.907	1039.28	313.247	265.192	1005.03	10.4275	569.275	1235.73	100.021	348.451	705.827	358.153	347.984	953.155	0.50777	643.998	1053.45	15.3619	571.674	1010.87	170.482	487.682	753.301	-149.491	559.723	1229.8	239.39	252.15	722.873	387.278	159.375	689.349	368.001
79	0.78	355.125	700.41	430.046	191.561	1019.22	90.9708	299.779	939.327	-52.8101	517.748	1237.42	167.624	622.343	664.611	398.015	647.958	1039.28	313.305	268.105	1011.32	12.6603	569.256	1235.75	100.012	348.53	705.81	358.197	350.1	958.079	1.81027	644.421	1053.73	15.7408	571.706	1010.94	170.593	484.735	755.86	-149.435	559.922	1229.79	239.287	252.165	722.921	387.31	159.366	689.355	368.02
80	0.79	355.1	700.433	430.048	196.014	1026.71	94.5083	301.041	944.676	-50.4642	517.715	1237.42	167.59	622.356	664.568	398.033	648.004	1039.26	313.331	271.144	1017.44	14.8901	569.27	1235.74	99.9943	348.53	705.805	358.198	352.353	963.096	3.02058	644.844	1053.96	16.101	571.765	1010.97	170.665	481.947	758.333	-149.36	561.1	1229.71	238.879	252.174	722.932	387.297	159.368	689.367	368.021
81	0.8	355.109	700.443	430.047	200.693	1033.92	98.0305	302.484	949.906	-48.2372	517.719	1237.39	167.543	622.351	664.564	398.06	648.073	1039.23	313.327	274.163	1023.44	17.0475	569.324	1235.69	99.9526	348.471	705.819	358.179	354.739	968.085	4.20898	645.267	1054.15	16.4274	571.859	1010.97	170.702	479.261	760.895	-149.256	561.377	1229.69	238.781	252.153	722.9	387.268	159.394	689.357	367.99
82	0.81	355.142	700.424	430.045	205.59	1040.9	101.482	303.684	954.992	-46.0333	517.74	1237.35	167.483	622.295	664.542	398.124	648.122	1039.2	313.326	277.3	1029.3	19.1738	569.345	1235.63	99.9061	348.446	705.811	358.192	357.184	973.037	5.31699	645.624	1054.33	16.7256	571.973	1010.94	170.75	476.32	763.321	-149.127	561.393	1229.68	238.751	252.169	722.852	387.236	159.399	689.347	367.974
83	0.82	355.128	700.422	430.057	210.571	1047.77	104.941	304.922	960.049	-43.7623	517.738	1237.33	167.467	622.267	664.53	398.178	648.164	1039.18	313.342	280.608	1035.03	21.2626	569.325	1235.59	99.8899	348.415	705.81	358.198	359.581	977.904	6.34384	645.944	1054.54	17.0251	572.093	1010.91	170.802	473.314	765.817	-148.964	561.392	1229.67	238.725	252.166	722.816	387.232	159.414	689.339	367.985
84	0.83	355.089	700.426	430.066	215.589	1054.55	108.419	306.266	965.036	-41.509	517.73	1237.29	167.441	622.22	664.537	398.249	648.198	1039.17	313.354	283.912	1040.6	23.3992	569.31	1235.57	99.8688	348.486	705.802	358.24	362.121	982.699	7.34894	646.26	1054.74	17.3177	572.149	1010.89	170.846	470.485	768.422	-148.762	561.399	1229.68	238.722	252.133	722.809	387.232	159.422	689.323	367.989
85	0.84	355.074	700.417	430.06	220.699	1061.19	111.748	307.487	969.955	-39.2927	517.769	1237.29	167.399	622.22	664.578	398.282	648.228	1039.18	313.366	287.255	1046.08	25.4655	569.311	1235.56	99.8398	348.532	705.771	358.241	364.785	987.358	8.28272	646.576	1054.95	17.5802	572.218	1010.88	170.858	467.82	770.928	-148.46	560.806	1229.71	238.88	252.133	722.818	387.231	159.388	689.327	368.001
86	0.85	355.065	700.408	430.056	225.83	1067.6	115.079	308.954	974.806	-37.139	517.74	1237.32	167.385	622.211	664.618	398.33	648.248	1039.21	313.401	290.604	1051.48	27.4985	569.297	1235.58	99.8284	348.56	705.778	358.242	367.409	991.878	9.20051	646.949	1055.19	17.8452	572.253	1010.89	170.906	465.054	773.345	-148.287	560.084	1229.77	239.072	252.139	722.849	387.237	159.383	689.326	368.003
87	0.86	355.051	700.402	430.058	231.023	1073.87	118.309	310.54	979.541	-35.0099	517.682	1237.36	167.383	622.221	664.665	398.4	648.263	1039.23	313.432	294.002	1056.76	29.482	569.286	1235.61	99.8076	348.593	705.772	358.274	369.968	996.295	10.1874	647.355	1055.43	18.1706	572.264	1010.92	171.006	461.921	775.562	-148.426	560.496	1229.76	238.933	252.151	722.872	387.245	159.392	689.324	368.026
88	0.87	355.09	700.414	430.066	236.328	1079.97	121.485	312.226	984.197	-32.7982	517.631	1237.4	167.365	622.202	664.668	398.445	648.276	1039.26	313.441	297.47	1061.94	31.4998	569.308	1235.62	99.7689	348.633	705.756	358.291	372.588	1000.58	11.1461	647.769	1055.68	18.5137	572.402	1010.92	171.063	459.276	778.085	-148.16	559.5	1229.86	239.253	252.169	722.874	387.243	159.381	689.347	368.043
89	0.88	355.101	700.438	430.067	241.715	1085.91	124.635	313.874	988.796	-30.707	517.508	1237.46	167.309	622.185	664.705	398.484	648.307	1039.28	313.433	300.952	1066.93	33.4761	569.332	1235.6	99.7047	348.652	705.753	358.299	375.26	1004.78	11.9795	648.138	1055.92	18.8252	572.453	1010.94	171.072	456.72	780.653	-147.884	559.26	1229.92	239.275	252.151	722.847	387.216	159.396	689.354	368.014
90	0.89	355.112	700.447	430.049	247.284	1091.6	127.664	315.73	993.102	-28.7738	517.456	1237.51	167.24	622.196	664.711	398.542	648.359	1039.3	313.417	304.605	1071.72	35.2479	569.337	1235.59	99.6457	348.596	705.75	358.281	377.84	1008.84	12.8721	648.492	1056.16	19.0989	572.501	1010.98	171.046	454.172	783.127	-147.472	559.22	1230	239.216	252.153	722.817	387.2	159.399	689.353	367.981
91	0.9	355.121	700.451	430.057	252.747	1097.2	130.631	317.853	997.077	-26.7668	517.447	1237.56	167.177	622.181	664.74	398.594	648.384	1039.31	313.414	308.208	1076.42	37.0565	569.367	1235.59	99.5954	348.611	705.722	358.267	380.455	1012.76	13.7696	648.855	1056.39	19.3889	572.566	1011.02	171.047	451.968	785.679	-147.084	559.837	1230.04	238.977	252.182	722.81	387.186	159.402	689.361	367.962
92	0.91	355.139	700.456	430.076	258.507	1102.62	133.341	319.542	1001.03	-24.3107	517.42	1237.59	167.104	622.199	664.789	398.654	648.416	1039.32	313.42	311.719	1081.1	38.9126	569.384	1235.59	99.5506	348.598	705.724	358.252	383.234	1016.64	14.4733	649.214	1056.61	19.6787	572.638	1011.04	171.072	449.739	788.132	-146.654	560.571	1230.06	238.72	252.204	722.817	387.195	159.417	689.355	367.962
93	0.92	355.107	700.442	430.058	264.158	1107.9	136.046	321.342	1005.12	-22.178	517.387	1237.62	167.048	622.202	664.8	398.733	648.431	1039.34	313.411	315.323	1085.53	40.768	569.374	1235.58	99.5058	348.618	705.707	358.275	385.899	1020.52	15.1999	649.483	1056.79	19.9464	572.711	1011.05	171.076	447.475	790.572	-146.167	560.204	1230.13	238.795	252.205	722.8	387.17	159.428	689.337	367.965
94	0.93	355.085	700.446	430.043	269.75	1112.79	138.792	323.21	1009.19	-20.094	517.403	1237.62	167.033	622.174	664.834	398.809	648.447	1039.34	313.393	318.934	1089.79	42.5598	569.405	1235.57	99.4571	348.593	705.712	358.267	388.52	1024.19	15.9484	649.682	1056.97	20.2188	572.811	1011.03	171.085	445.346	793.009	-145.647	561.174	1230.14	238.401	252.186	722.797	387.133	159.43	689.328	367.955
95	0.94	355.05	700.43	430.069	275.305	1117.64	141.482	325.095	1013.22	-18.1152	517.425	1237.64	167.039	622.201	664.892	398.868	648.479	1039.35	313.4	322.434	1094.01	44.3294	569.41	1235.57	99.4352	348.574	705.73	358.337	391.102	1027.61	16.6684	649.852	1057.17	20.5221	572.872	1011.03	171.116	443.247	795.361	-145.07	561.387	1230.18	238.305	252.189	722.815	387.152	159.435	689.327	367.959
96	0.95	355.028	700.439	430.092	280.771	1122.24	144.117	327.018	1017.15	-16.2066	517.437	1237.66	167.05	622.218	664.948	398.925	648.522	1039.38	313.431	326.057	1098.06	46.1101	569.379	1235.57	99.4345	348.601	705.716	358.413	393.662	1031.1	17.3376	650.034	1057.35	20.8444	572.947	1011.07	171.199	441.145	797.92	-144.567	561.448	1230.22	238.264	252.175	722.836	387.19	159.439	689.321	367.994
97	0.96	355.022	700.451	430.089	286.377	1126.71	146.557	329.016	1020.92	-14.3369	517.435	1237.71	167.068	622.247	665.035	398.973	648.56	1039.41	313.442	329.763	1102	47.8444	569.343	1235.59	99.4184	348.619	705.719	358.391	396.503	1034.45	18.0226	650.232	1057.54	21.1562	573.041	1011.06	171.457	439.07	800.431	-144.162	561.486	1230.28	238.225	252.161	722.838	387.191	159.461	689.302	368
98	0.97	354.996	700.464	430.101	291.982	1131	148.797	331	1024.69	-12.558	517.375	1237.78	167.061	622.265	665.063	399.021	648.57	1039.43	313.42	333.42	1105.82	49.4537	569.348	1235.61	99.3614	348.632	705.696	358.377	398.971	1037.59	18.7949	650.455	1057.7	21.4511	573.097	1010.95	171.687	436.71	802.977	-143.655	561.484	1230.33	238.178	252.156	722.819	387.171	159.447	689.315	367.986
99	0.98	354.993	700.485	430.126	297.406	1135.09	151.127	332.906	1028.35	-10.764	517.423	1237.81	167.034	622.251	665.074	399.04	648.585	1039.44	313.404	337.111	1109.49	51.0689	569.358	1235.62	99.3345	348.599	705.728	358.432	401.646	1040.62	19.4603	650.722	1057.83	21.7371	573.19	1010.91	171.511	434.064	805.811	-143.019	561.533	1230.38	238.165	252.154	722.824	387.183	159.438	689.336	368
100	0.99	355.041	700.502	430.141	302.866	1139.01	153.378	334.962	1031.89	-8.99443	517.433	1237.85	167.037	622.24	665.082	399.055	648.639	1039.46	313.391	340.782	1113.06	52.6784	569.39	1235.65	99.3078	348.553	705.75	358.416	404.222	1043.54	20.2596	651.061	1057.99	22.0149	573.721	1011	171.228	431.74	808.412	-142.443	561.63	1230.45	238.13	252.149	722.831	387.199	159.423	689.355	368.014
101	1	355.031	700.488	430.106	308.177	1142.87	155.516	336.933	1035.41	-7.40816	517.376	1237.94	167.014	622.27	665.107	399.062	648.818	1039.57	313.341	344.573	1116.47	54.2338	569.4	1235.65	99.2594	348.561	705.758	358.388	406.82	1046.32	20.8956	651.363	1058.16	22.2378	573.471	1011.33	171.325	429.554	810.886	-141.965	561.7	1230.52	238.08	252.161	722.817	387.174	159.404	689.369	367.995
102	1.01	355.021	700.483	430.073	313.634	1146.45	157.481	339.165	1038.76	-5.81202	517.354	1238.02	166.952	622.275	665.14	399.038	649.025	1039.75	313.306	348.225	1119.78	55.7647	569.405	1235.67	99.1946	348.506	705.754	358.338	409.484	1049.01	21.5301	651.633	1058.33	22.4294	571.19	1012.14	171.974	427.612	813.348	-141.475	561.773	1230.58	238.06	252.162	722.804	387.12	159.394	689.364	367.944
103	1.02	355.06	700.489	430.085	318.888	1149.83	159.439	341.348	1042.02	-4.31595	517.368	1238.07	166.953	622.231	665.143	399.042	648.904	1039.77	313.373	351.89	1122.92	57.2925	569.406	1235.7	99.1779	348.546	705.718	358.356	411.9	1051.54	22.2381	651.903	1058.5	22.6528	570.878	1012.3	172.02	425.7	815.765	-140.95	561.8	1230.64	238.037	252.127	722.804	387.116	159.398	689.348	367.94
104	1.03	355.078	700.487	430.1	324.03	1152.99	161.499	343.48	1045.25	-2.7191	517.429	1238.14	166.984	622.219	665.138	399.072	648.913	1039.79	313.397	355.655	1125.92	58.7728	569.385	1235.74	99.1961	348.603	705.724	358.376	414.489	1054.02	22.8542	652.198	1058.68	22.881	570.93	1012.35	172.059	423.831	818.241	-140.404	561.884	1230.71	238.053	252.148	722.8	387.149	159.441	689.345	367.972
105	1.04	355.096	700.485	430.102	329.376	1155.96	163.413	345.466	1048.45	-1.16694	517.483	1238.21	166.995	622.295	665.179	399.057	648.948	1039.81	313.399	359.383	1128.84	60.2069	569.417	1235.77	99.1704	348.625	705.73	358.356	417.169	1056.38	23.3442	652.441	1058.84	23.0707	571.006	1012.39	172.078	422.11	820.532	-139.886	561.963	1230.8	238.05	252.172	722.808	387.14	159.436	689.361	367.968
106	1.05	355.059	700.479	430.081	334.765	1158.86	165.199	347.612	1051.38	0.28663	517.471	1238.27	166.992	622.277	665.182	399.044	648.986	1039.81	313.366	362.933	1131.64	61.5476	569.475	1235.8	99.1212	348.577	705.717	358.3	419.621	1058.76	23.8342	652.682	1059.03	23.2501	571.06	1012.41	172.051	420.405	822.931	-139.487	561.991	1230.86	238.033	252.175	722.806	387.111	159.415	689.366	367.947
107	1.06	355.057	700.488	430.09	340.032	1161.58	167.05	349.799	1054.17	1.61832	517.537	1238.33	166.989	622.302	665.219	399.035	649.012	1039.82	313.35	366.434	1134.27	62.882	569.513	1235.83	99.0955	348.555	705.723	358.302	422.08	1061.12	24.3233	652.942	1059.21	23.4489	571.237	1012.4	172.032	418.627	825.287	-139.087	562.147	1230.92	238.041	252.208	722.805	387.116	159.425	689.358	367.949
108	1.07	355.069	700.508	430.098	345.179	1164.15	168.838	351.987	1056.89	3.0212	517.682	1238.4	167.012	622.36	665.281	399.026	649.059	1039.84	313.35	369.918	1136.81	64.2923	569.521	1235.88	99.1058	348.626	705.726	358.333	424.567	1063.2	24.7521	653.13	1059.38	23.6811	571.4	1012.41	172.066	416.7	827.394	-138.668	562.249	1230.97	238.034	252.223	722.802	387.132	159.463	689.352	367.978
109	1.08	355.038	700.515	430.104	350.212	1166.42	170.56	354.066	1059.7	4.39577	517.721	1238.51	167.06	622.358	665.297	398.991	649.108	1039.84	313.339	373.435	1139.26	65.6186	569.516	1235.95	99.1311	348.709	705.717	358.348	427.144	1065.39	25.1024	653.281	1059.53	23.9064	571.493	1012.43	172.093	414.373	829.311	-138.385	562.358	1231.03	238.006	252.224	722.829	387.154	159.461	689.362	367.99
110	1.09	355.022	700.502	430.086	355.333	1168.63	172.131	356.119	1062.32	5.71474	517.686	1238.59	167.081	622.298	665.309	398.966	649.109	1039.85	313.309	376.873	1141.55	66.9167	569.496	1236.01	99.1425	348.698	705.709	358.348	429.411	1067.43	25.5118	653.489	1059.68	24.1521	571.488	1012.45	172.09	412.595	831.478	-137.936	562.435	1231.13	237.97	252.203	722.84	387.16	159.438	689.357	367.995
111	1.1	355.007	700.491	430.074	360.092	1170.59	173.769	358.269	1064.81	6.88037	517.722	1238.67	167.084	622.337	665.341	399.005	649.131	1039.85	313.313	380.413	1143.68	68.1733	569.524	1236.05	99.1264	348.623	705.725	358.351	431.875	1069.32	25.924	653.831	1059.81	24.522	571.592	1012.43	172.077	411.129	833.706	-137.526	562.53	1231.24	237.941	252.164	722.809	387.154	159.444	689.337	367.99
112	1.11	355.032	700.481	430.082	364.929	1172.41	175.345	360.456	1067.26	8.04546	517.85	1238.72	167.102	622.36	665.365	399.015	649.172	1039.87	313.312	383.864	1145.8	69.3316	569.612	1236.07	99.0989	348.628	705.712	358.346	434.313	1071.07	26.2827	654.285	1059.95	24.9238	571.64	1012.45	172.088	409.684	835.882	-137.11	562.645	1231.32	237.939	252.184	722.792	387.133	159.473	689.317	367.99
113	1.12	355.076	700.5	430.073	369.711	1174.22	176.834	362.597	1069.62	9.23052	517.908	1238.82	167.116	622.386	665.401	398.999	649.222	1039.89	313.288	387.288	1147.85	70.5847	569.643	1236.13	99.0893	348.641	705.704	358.312	436.7	1072.83	26.6815	654.649	1060.16	25.2164	571.68	1012.51	172.079	408.316	838.09	-136.799	562.744	1231.39	237.928	252.188	722.785	387.122	159.474	689.325	367.971
114	1.13	355.074	700.515	430.056	374.639	1175.9	178.136	364.656	1071.96	10.2843	517.964	1238.93	167.096	622.404	665.417	399.006	649.228	1039.89	313.26	390.783	1149.75	71.7674	569.689	1236.19	99.0594	348.565	705.739	358.266	439.063	1074.59	27.0237	654.844	1060.37	25.4356	571.585	1012.61	172.063	406.985	840.216	-136.414	562.802	1231.5	237.917	252.161	722.789	387.111	159.462	689.335	367.941
115	1.14	355.058	700.534	430.057	379.214	1177.49	179.605	366.781	1074.34	11.2951	518.014	1239.05	167.082	622.369	665.412	399.027	649.223	1039.89	313.248	394.218	1151.54	72.8447	569.74	1236.26	99.0293	348.483	705.766	358.262	441.384	1076.18	27.3729	655.003	1060.51	25.6861	571.455	1012.7	172.067	405.65	842.354	-136.075	562.902	1231.62	237.9	252.133	722.785	387.091	159.464	689.357	367.919
116	1.15	355.096	700.54	430.054	383.803	1178.97	180.907	369.193	1076.45	12.2294	518.045	1239.18	167.109	622.362	665.417	399.062	649.227	1039.9	313.238	397.783	1153.25	73.9106	569.797	1236.34	99.0246	348.503	705.749	358.271	443.775	1077.61	27.7941	655.132	1060.63	25.8931	571.429	1012.78	172.087	404.501	844.406	-135.764	563.08	1231.71	237.896	252.185	722.803	387.087	159.472	689.365	367.927
117	1.16	355.064	700.532	430.047	388.431	1180.48	182.043	371.415	1078.55	13.1551	518.077	1239.32	167.155	622.419	665.432	399.087	649.236	1039.9	313.216	401.302	1154.8	75.0073	569.819	1236.41	99.0338	348.565	705.74	358.277	446.024	1078.77	28.2005	655.274	1060.74	26.0517	571.484	1012.78	172.094	403.396	846.469	-135.393	563.17	1231.79	237.909	252.181	722.824	387.097	159.428	689.387	367.93
118	1.17	355.004	700.521	430.039	392.917	1181.86	183.087	373.454	1080.65	14.1802	518.198	1239.42	167.141	622.347	665.401	399.096	649.22	1039.88	313.194	404.65	1156.3	76.0519	569.858	1236.47	99.0209	348.604	705.726	358.278	448.355	1079.9	28.6506	655.409	1060.82	26.2189	571.599	1012.74	172.073	402.292	848.452	-135.078	562.72	1231.9	238.037	252.173	722.828	387.093	159.381	689.385	367.928
119	1.18	355.005	700.505	430.053	396.788	1182.99	184.387	375.62	1082.59	15.0064	518.353	1239.5	167.126	622.297	665.383	399.125	649.187	1039.86	313.202	408.052	1157.64	77.064	569.975	1236.53	99.0001	348.685	705.707	358.344	450.468	1080.92	29.0756	655.591	1060.94	26.3966	571.709	1012.67	172.051	401.161	850.383	-134.766	562.143	1232.03	238.24	252.171	722.835	387.106	159.407	689.365	367.953
120	1.19	355.042	700.487	430.078	400.952	1184.16	185.539	377.912	1084.43	15.7714	518.574	1239.6	167.115	622.31	665.392	399.162	649.195	1039.84	313.23	411.363	1158.91	78.0157	570.096	1236.57	99.004	348.659	705.708	358.367	452.781	1082	29.541	655.848	1061.03	26.589	571.827	1012.62	172.086	400.185	852.266	-134.398	563.105	1232.02	238.007	252.203	722.816	387.115	159.463	689.333	367.984
121	1.2	355.03	700.483	430.089	404.98	1185.16	186.524	380.097	1086.24	16.5861	518.789	1239.69	167.109	622.298	665.405	399.185	649.195	1039.84	313.232	414.569	1160.17	79.0383	570.195	1236.62	98.9889	348.696	705.688	358.37	455.015	1083.03	29.9739	656.096	1061.16	26.7756	571.885	1012.61	172.105	399.189	854.176	-134.006	563.453	1232.07	237.934	252.209	722.786	387.125	159.484	689.318	368.01
122	1.21	354.999	700.495	430.065	408.838	1186.17	187.468	381.968	1088.09	17.4747	518.943	1239.8	167.073	622.331	665.44	399.216	649.188	1039.85	313.196	417.739	1161.37	79.9326	570.294	1236.69	98.9486	348.721	705.658	358.377	457.111	1084.01	30.4114	656.35	1061.26	26.9397	571.944	1012.65	172.06	398.25	855.932	-133.6	563.539	1232.15	237.903	252.178	722.766	387.103	159.465	689.314	367.987
123	1.22	354.998	700.512	430.056	412.366	1187.08	188.543	384.021	1089.7	18.2085	519.186	1239.93	166.998	622.283	665.452	399.248	649.16	1039.87	313.16	420.758	1162.45	80.7507	570.434	1236.78	98.8879	348.622	705.67	358.352	459.126	1084.96	30.8397	656.636	1061.38	27.1108	571.933	1012.73	172.02	397.358	857.777	-133.309	563.07	1232.28	238.051	252.183	722.757	387.07	159.487	689.309	367.955
124	1.23	354.998	700.548	430.046	415.972	1187.86	189.531	386.12	1091.3	18.8692	519.405	1240.1	166.963	622.288	665.488	399.298	649.199	1039.91	313.141	423.627	1163.55	81.6494	570.59	1236.86	98.8634	348.563	705.667	358.323	460.981	1085.87	31.1728	656.892	1061.49	27.3013	571.865	1012.84	172.017	396.577	859.542	-132.932	562.517	1232.41	238.25	252.187	722.782	387.063	159.474	689.334	367.953
125	1.24	355.003	700.572	430.042	419.576	1188.59	190.452	388.182	1092.8	19.5912	519.482	1240.33	166.944	622.284	665.497	399.333	649.237	1039.94	313.13	426.383	1164.56	82.5469	570.721	1236.96	98.8662	348.531	705.703	358.299	463.005	1086.79	31.5266	657.168	1061.59	27.487	572.141	1012.65	171.899	395.702	861.207	-132.533	563.488	1232.39	237.943	252.164	722.806	387.066	159.431	689.366	367.947
126	1.25	355.016	700.571	430.027	422.919	1189.23	191.329	389.923	1094.27	20.4018	519.498	1240.55	166.898	622.292	665.53	399.354	649.232	1039.96	313.107	429.168	1165.44	83.3985	569.969	1237.09	98.4624	348.548	705.696	358.295	464.911	1087.63	31.8486	657.467	1061.71	27.6749	572.869	1012.07	171.581	394.907	862.902	-132.23	563.773	1232.43	237.816	252.159	722.835	387.048	159.407	689.387	367.91
127	1.26	355.003	700.576	430.045	426.216	1189.82	192.194	391.641	1095.71	21.1005	519.62	1240.71	166.829	622.369	665.589	399.404	649.212	1039.96	313.095	431.927	1166.33	84.162	568.289	1237.21	97.6113	348.545	705.678	358.32	466.673	1088.37	32.1198	657.731	1061.82	27.8623	573.312	1011.92	171.422	394.253	864.584	-131.968	563.934	1232.49	237.765	252.146	722.836	387.039	159.416	689.379	367.899
128	1.27	355.006	700.58	430.056	429.452	1190.39	193.18	393.561	1097	21.7207	519.873	1240.83	166.762	622.356	665.596	399.467	649.009	1039.79	313.114	434.591	1167.08	85.0809	568.419	1237.2	97.5245	348.582	705.673	358.313	468.625	1089.14	32.4213	657.949	1061.9	28.0046	573.937	1011.84	171.273	393.486	866.113	-131.57	564.035	1232.56	237.739	252.147	722.843	387.059	159.423	689.373	367.926
129	1.28	354.986	700.581	430.044	432.384	1190.67	194.074	395.396	1098.33	22.4016	520.049	1240.95	166.731	622.35	665.612	399.501	648.621	1039.39	313.125	437.23	1167.75	85.8928	568.985	1237.17	97.6052	347.958	706.195	358.008	470.535	1089.85	32.7004	658.185	1061.98	28.1525	574.409	1011.76	171.171	392.805	867.573	-131.24	563.571	1232.66	237.888	252.177	722.837	387.066	159.417	689.373	367.941
130	1.29	354.984	700.54	430.013	436.487	1190.94	195.233	397.216	1099.57	23.0797	520.226	1241.08	166.686	622.318	665.619	399.525	648.695	1039.36	313.084	440.002	1168.39	86.626	569.846	1237.21	97.8716	346.626	707.336	357.296	472.279	1090.35	32.9792	658.41	1062.1	28.2869	574.665	1011.7	171.117	392.204	869.131	-130.976	562.279	1232.82	238.33	252.185	722.796	387.049	159.443	689.346	367.932
131	1.3	354.962	700.542	430.027	440.949	1191.35	196.713	398.98	1100.58	23.7208	520.424	1241.16	166.584	622.289	665.62	399.576	648.886	1039.44	313.054	442.608	1168.98	87.2902	570.791	1237.42	98.2678	346.913	707.122	357.449	474.112	1090.82	33.3312	658.666	1062.21	28.3944	574.819	1011.64	171.07	391.596	870.588	-130.692	562.013	1232.89	238.414	252.166	722.769	387.016	159.467	689.317	367.923
132	1.31	354.952	700.551	430.051	443.949	1191.73	197.578	400.909	1101.68	24.245	520.62	1241.3	166.513	622.311	665.628	399.66	649.037	1039.52	313.064	445.168	1169.44	88.1209	571.136	1237.54	98.3518	347.611	706.559	357.832	475.902	1091.26	33.6616	658.939	1062.33	28.566	574.976	1011.6	171.057	390.991	871.96	-130.434	561.995	1232.96	238.416	252.16	722.746	387.018	159.474	689.31	367.907
133	1.32	355.023	700.538	430.054	446.348	1192.16	198.214	402.723	1102.76	24.7456	520.802	1241.51	166.491	622.333	665.625	399.696	649.159	1039.6	313.081	447.671	1169.88	88.8896	571.308	1237.64	98.359	346.656	707.372	357.241	477.552	1091.59	33.9212	659.175	1062.42	28.6809	575.016	1011.66	171.088	390.323	873.389	-130.138	562.115	1233	238.365	252.192	722.746	387.03	159.468	689.318	367.907
134	1.33	355.016	700.536	430.055	448.52	1192.32	198.674	404.529	1103.72	25.2202	520.943	1241.75	166.453	622.314	665.612	399.718	649.215	1039.65	313.091	450.175	1170.24	89.6223	571.696	1237.63	98.3822	346.428	707.563	357.069	479.237	1091.95	34.1831	659.443	1062.54	28.7603	574.969	1011.73	171.124	389.723	874.762	-129.846	562.157	1233.07	238.328	252.233	722.781	387.032	159.45	689.333	367.924
135	1.34	355.007	700.534	430.063	450.936	1192.08	199.059	406.156	1104.74	25.8467	521.074	1241.94	166.403	622.294	665.612	399.779	649.238	1039.68	313.119	452.547	1170.51	90.2934	572.403	1237.48	98.4704	346.262	707.66	357.049	480.905	1092.31	34.4744	659.473	1062.47	28.858	574.986	1011.77	171.148	389.178	876.055	-129.589	562.179	1233.15	238.324	252.226	722.823	387.05	159.436	689.333	367.936
136	1.35	355.011	700.538	430.068	453.755	1191.83	199.654	407.521	1105.73	26.4705	521.232	1242.12	166.369	622.253	665.602	399.839	649.27	1039.69	313.143	454.911	1170.74	91.0253	572.699	1237.56	98.533	346.204	707.699	357.069	482.383	1092.61	34.7423	659.093	1062.09	28.9525	575.058	1011.79	171.167	388.649	877.354	-129.343	562.234	1233.22	238.334	252.24	722.844	387.055	159.467	689.34	367.943
137	1.36	354.989	700.558	430.089	456.556	1191.62	200.302	409.064	1106.56	26.9419	521.354	1242.29	166.33	622.23	665.586	399.845	649.304	1039.7	313.162	457.08	1170.92	91.8281	572.85	1237.73	98.5308	346.22	707.696	357.077	483.679	1092.87	34.9562	659.137	1062.02	29.0604	575.125	1011.82	171.167	388.115	878.581	-129.117	562.313	1233.28	238.33	252.24	722.836	387.043	159.476	689.342	367.945
138	1.37	354.99	700.559	430.064	458.955	1191.48	201.015	410.779	1107.28	27.2851	521.41	1242.46	166.274	622.207	665.591	399.867	649.31	1039.69	313.158	459.176	1171.06	92.5493	572.939	1237.92	98.5083	346.097	707.738	357.059	485.13	1093.22	35.206	659.265	1062.03	29.1696	575.113	1011.83	171.178	387.561	879.739	-128.987	562.425	1233.4	238.296	252.232	722.817	387.017	159.417	689.368	367.929
139	1.38	354.981	700.56	430.07	461.181	1191.12	201.802	412.299	1107.98	27.6505	521.475	1242.61	166.227	622.191	665.594	399.91	649.307	1039.69	313.151	461.324	1171.2	93.1749	573.016	1238.08	98.4746	345.944	707.797	357.037	486.579	1093.55	35.4763	659.337	1062.04	29.3337	575.129	1011.82	171.139	387.006	880.878	-128.822	562.614	1233.56	238.264	252.16	722.79	386.991	159.391	689.363	367.903
140	1.39	354.99	700.579	430.082	463.687	1190.62	202.662	413.627	1108.67	28.1475	521.602	1242.73	166.185	622.207	665.609	399.953	649.32	1039.68	313.16	463.441	1171.24	93.845	573.152	1238.17	98.445	346.005	707.777	357.029	487.919	1093.84	35.684	659.499	1062.07	29.4786	575.217	1011.81	171.107	386.577	882.008	-128.682	562.783	1233.71	238.242	252.121	722.775	386.987	159.435	689.343	367.891
141	1.4	355.025	700.588	430.061	465.84	1190.24	203.48	415.028	1109.43	28.7172	521.767	1242.88	166.195	622.252	665.625	399.964	649.342	1039.69	313.183	465.387	1171.22	94.6084	573.343	1238.26	98.4306	346.018	707.772	357.025	489.078	1094	35.7863	659.699	1062.12	29.589	575.264	1011.82	171.125	386.171	883.127	-128.576	562.904	1233.84	238.242	252.153	722.775	386.986	159.46	689.346	367.898
142	1.41	355.025	700.559	430.064	468.012	1189.81	204.285	416.32	1110.02	29.3105	521.856	1243	166.224	622.258	665.651	399.999	649.327	1039.7	313.229	467.183	1171.19	95.4178	573.496	1238.35	98.4428	345.971	707.789	357.036	490.367	1094.14	35.9203	659.825	1062.16	29.6631	575.218	1011.88	171.157	385.594	884.242	-128.416	563.008	1233.94	238.247	252.189	722.807	387.005	159.422	689.362	367.914
143	1.42	354.983	700.542	430.083	470.214	1189.2	205.014	417.499	1110.48	29.8067	521.949	1243.1	166.259	622.233	665.671	400.041	649.308	1039.71	313.262	469.092	1171.13	96.1595	573.621	1238.46	98.4662	346.184	707.707	357.041	491.8	1094.3	36.139	659.92	1062.14	29.7566	575.161	1011.93	171.205	384.994	885.255	-128.202	563.088	1234.03	238.256	252.173	722.825	387.042	159.414	689.355	367.936
144	1.43	354.953	700.527	430.106	472.403	1188.57	205.758	418.804	1110.97	30.2079	522.113	1243.2	166.275	622.225	665.686	400.067	649.341	1039.7	313.287	471.029	1171.02	96.7346	573.782	1238.54	98.5039	346.278	707.677	357.055	493.212	1094.41	36.3288	660.075	1062.18	29.8718	575.219	1011.93	171.264	384.562	886.175	-128.027	563.27	1234.07	238.26	252.195	722.811	387.059	159.469	689.33	367.966
145	1.44	354.987	700.513	430.102	474.602	1188.06	206.389	420.285	1111.53	30.5743	522.253	1243.28	166.32	622.247	665.717	400.074	649.41	1039.69	313.297	472.901	1170.93	97.2912	574.044	1238.61	98.5308	346.261	707.684	357.08	494.468	1094.5	36.4287	660.176	1062.21	29.9218	575.366	1011.89	171.267	384.192	887.135	-127.885	563.509	1234.15	238.26	252.25	722.783	387.061	159.513	689.307	367.981
146	1.45	354.959	700.512	430.096	476.92	1187.32	206.83	421.639	1112.05	30.9208	522.349	1243.37	166.331	622.293	665.75	400.074	649.427	1039.67	313.289	474.726	1170.85	97.8593	574.233	1238.67	98.5383	346.239	707.692	357.096	495.551	1094.51	36.52	660.279	1062.22	29.9851	575.442	1011.87	171.24	383.687	888.16	-127.753	563.664	1234.28	238.238	252.235	722.768	387.029	159.523	689.298	367.968
147	1.46	354.947	700.518	430.108	479.17	1186.58	207.341	422.924	1112.56	31.2551	522.416	1243.48	166.335	622.244	665.726	400.108	649.409	1039.67	313.273	476.461	1170.7	98.3561	574.371	1238.75	98.5218	346.182	707.722	357.128	496.682	1094.51	36.646	660.288	1062.24	30.0667	575.456	1011.87	171.22	383.174	889.105	-127.615	563.712	1234.44	238.245	252.189	722.748	387.003	159.513	689.309	367.956
148	1.47	354.933	700.55	430.097	481.171	1186.11	207.788	424.123	1112.99	31.6222	522.493	1243.61	166.323	622.238	665.749	400.137	649.417	1039.68	313.259	478.288	1170.5	98.8705	574.546	1238.81	98.507	346.112	707.741	357.115	497.8	1094.56	36.7341	660.341	1062.27	30.1466	575.503	1011.88	171.186	382.683	889.916	-127.416	563.791	1234.59	238.241	252.183	722.761	386.997	159.463	689.338	367.916
149	1.48	354.954	700.581	430.082	483.231	1185.58	208.184	425.228	1113.36	32.0408	522.624	1243.7	166.306	622.285	665.78	400.123	649.442	1039.7	313.244	479.999	1170.35	99.385	574.732	1238.88	98.4888	345.911	707.814	357.058	498.987	1094.66	36.7735	660.43	1062.28	30.1894	575.507	1011.93	171.158	382.339	890.647	-127.209	563.9	1234.69	238.218	252.201	722.776	386.984	159.445	689.367	367.875
150	1.49	354.989	700.598	430.06	485.402	1185.07	208.74	426.202	1113.72	32.4436	522.623	1243.82	166.316	622.261	665.746	400.138	649.463	1039.72	313.234	481.446	1170.24	99.7922	574.865	1238.94	98.5297	345.747	707.87	357.019	500.291	1094.8	36.7843	660.486	1062.3	30.242	575.473	1011.99	171.161	381.944	891.441	-126.981	564.04	1234.75	238.187	252.185	722.805	386.974	159.429	689.389	367.874
151	1.5	355.009	700.596	430.059	487.269	1184.77	209.227	427.197	1114.08	32.7987	522.685	1243.93	166.336	622.267	665.728	400.149	649.483	1039.71	313.238	482.882	1170.15	100.132	574.971	1239	98.5711	345.758	707.87	357.036	501.335	1094.86	36.815	660.505	1062.29	30.295	575.471	1012.05	171.175	381.535	892.251	-126.741	564.091	1234.8	238.234	252.195	722.824	386.992	159.42	689.394	367.897
152	1.51	355.023	700.573	430.067	488.889	1184.25	209.556	428.295	1114.44	33.0822	522.791	1243.98	166.372	622.247	665.738	400.14	649.529	1039.7	313.249	484.451	1170.05	100.522	575.108	1239.06	98.6167	345.871	707.831	357.083	502.09	1094.86	36.822	660.563	1062.33	30.3286	575.539	1012.07	171.184	381.114	893.04	-126.463	564.829	1234.74	238.054	252.235	722.824	387.011	159.453	689.37	367.933
153	1.52	355.032	700.57	430.085	490.905	1183.71	209.891	429.492	1114.76	33.3981	522.891	1244.02	166.412	622.256	665.741	400.12	649.599	1039.69	313.251	486.037	1169.95	100.842	575.239	1239.08	98.6629	346.16	707.735	357.088	502.939	1094.87	36.8324	660.64	1062.35	30.3658	575.643	1012.04	171.204	380.752	893.74	-126.149	565.762	1234.66	237.815	252.253	722.825	387.022	159.484	689.361	367.946
154	1.53	355.03	700.559	430.089	493.003	1183.3	210.092	430.619	1115.03	33.6951	522.985	1243.98	166.414	622.266	665.713	400.13	649.623	1039.66	313.238	487.571	1169.84	101.058	575.301	1239.07	98.6907	346.251	707.702	357.062	503.933	1094.87	36.893	660.622	1062.34	30.4053	575.69	1012.02	171.215	380.451	894.319	-125.873	564.763	1234.74	238.147	252.212	722.793	387.019	159.47	689.354	367.947
155	1.54	354.982	700.557	430.098	494.904	1183.14	210.281	431.687	1115.29	33.9412	523.011	1243.96	166.387	622.256	665.697	400.127	649.644	1039.64	313.21	489.124	1169.71	101.272	575.35	1239.04	98.6671	346.2	707.737	357.062	504.911	1094.84	37.0222	660.655	1062.33	30.4505	575.695	1011.99	171.19	380.096	894.89	-125.609	564.472	1234.77	238.198	252.186	722.776	387.021	159.46	689.339	367.949
156	1.55	354.979	700.568	430.087	496.749	1183.14	210.537	432.851	1115.62	34.1956	523.018	1243.95	166.37	622.309	665.73	400.104	649.698	1039.63	313.199	490.674	1169.61	101.513	575.425	1239.02	98.6272	346.164	707.756	357.056	505.969	1094.79	37.1288	660.704	1062.36	30.5023	575.713	1011.98	171.183	379.651	895.461	-125.317	564.361	1234.79	238.248	252.206	722.787	387.028	159.487	689.333	367.931
157	1.56	354.974	700.576	430.097	498.487	1182.76	210.73	433.989	1115.99	34.4758	523.057	1243.94	166.347	622.288	665.744	400.06	649.749	1039.63	313.205	492.203	1169.59	101.76	575.438	1239	98.6332	346.107	707.764	357.062	507.078	1094.73	37.1706	660.72	1062.36	30.5252	575.778	1011.96	171.184	379.192	896.035	-124.98	564.378	1234.79	238.283	252.173	722.794	387.028	159.458	689.341	367.93
158	1.57	354.96	700.572	430.105	500.38	1182.42	210.853	434.936	1116.29	34.7931	523.066	1243.91	166.323	622.232	665.727	400.029	649.794	1039.64	313.199	493.702	1169.59	101.907	575.44	1238.98	98.6155	346.172	707.729	357.055	508.08	1094.67	37.1662	660.758	1062.37	30.5658	575.818	1011.96	171.178	378.771	896.618	-124.608	564.388	1234.77	238.263	252.184	722.792	387.027	159.44	689.349	367.935
159	1.58	354.974	700.573	430.092	502.284	1182.31	210.873	435.817	1116.52	35.0829	523.089	1243.84	166.276	622.192	665.705	399.995	649.826	1039.64	313.178	495.122	1169.64	101.934	575.437	1238.95	98.5584	346.782	707.217	357.424	508.887	1094.6	37.1984	660.768	1062.37	30.617	575.816	1011.97	171.148	378.398	897.173	-124.217	564.276	1234.73	238.194	252.211	722.781	387.018	159.442	689.351	367.92
160	1.59	354.955	700.558	430.087	503.765	1182.35	210.995	436.768	1116.75	35.3289	522.986	1243.77	166.251	622.235	665.679	399.955	649.89	1039.65	313.163	496.605	1169.71	102.045	575.406	1238.92	98.5155	347.542	706.56	357.894	509.664	1094.53	37.2085	660.867	1062.4	30.6592	575.81	1012	171.122	378.07	897.707	-123.796	564.208	1234.64	238.171	252.218	722.803	387.017	159.464	689.353	367.916
161	1.6	354.955	700.539	430.086	504.654	1182.12	211.091	437.856	1117.06	35.5218	522.91	1243.69	166.247	622.285	665.653	399.924	649.972	1039.66	313.162	498.084	1169.75	102.255	575.343	1238.88	98.5323	346.556	707.419	357.302	510.59	1094.58	37.1932	660.959	1062.42	30.6972	575.827	1012.04	171.108	377.739	898.27	-123.35	564.228	1234.56	238.163	252.215	722.825	387.04	159.468	689.354	367.933
162	1.61	354.975	700.549	430.082	504.693	1181.76	211.215	438.934	1117.4	35.6683	522.853	1243.6	166.232	622.28	665.623	399.919	650.024	1039.66	313.147	499.426	1169.81	102.447	575.274	1238.8	98.5121	346.237	707.662	357.124	511.5	1094.68	37.2002	661.043	1062.43	30.6967	575.828	1012.05	171.085	377.419	898.804	-122.927	564.299	1234.47	238.097	252.223	722.832	387.059	159.488	689.358	367.948
163	1.62	355.014	700.576	430.065	504.194	1181.24	211.323	440.002	1117.75	35.746	522.825	1243.51	166.18	622.27	665.634	399.87	650.076	1039.66	313.113	500.508	1169.89	102.524	575.225	1238.7	98.422	346.694	707.231	357.371	512.384	1094.78	37.1991	661.11	1062.43	30.7074	575.791	1012.04	171.05	377.067	899.336	-122.561	564.26	1234.38	238.055	252.192	722.813	387.025	159.49	689.364	367.918
164	1.63	355.061	700.584	430.057	503.677	1180.7	211.458	440.935	1118.12	35.7801	522.738	1243.39	166.142	622.322	665.705	399.849	650.111	1039.67	313.081	501.482	1170.02	102.535	575.138	1238.6	98.36	347.534	706.563	357.758	513.303	1094.93	37.1788	661.174	1062.42	30.7312	575.79	1012.03	170.996	376.715	899.828	-122.251	564.245	1234.32	238.023	252.146	722.799	386.995	159.46	689.368	367.888
165	1.64	355.069	700.592	430.053	503.43	1180.12	211.498	441.731	1118.54	35.7996	522.662	1243.23	166.124	622.398	665.747	399.831	650.167	1039.68	313.079	502.503	1170.15	102.546	575.062	1238.49	98.3402	346.508	707.44	357.149	514.16	1095.1	37.1532	661.259	1062.41	30.7483	575.807	1012.04	170.959	376.395	900.288	-121.923	564.313	1234.22	237.988	252.162	722.795	386.988	159.463	689.363	367.9
166	1.65	355.034	700.59	430.057	503.482	1179.63	211.469	442.415	1118.91	35.8473	522.708	1243.07	166.116	622.401	665.785	399.816	650.218	1039.7	313.083	503.532	1170.33	102.624	574.965	1238.37	98.3203	346.472	707.574	357.005	514.953	1095.28	37.1479	661.344	1062.43	30.7704	575.824	1012.02	170.956	376.115	900.711	-121.547	564.357	1234.07	237.957	252.227	722.787	387.002	159.488	689.355	367.931
167	1.66	355.022	700.569	430.063	503.549	1179.52	211.521	443.01	1119.24	35.9239	522.684	1242.94	166.108	622.4	665.806	399.828	650.221	1039.71	313.098	504.342	1170.53	102.742	574.804	1238.26	98.3004	346.353	707.659	357.012	515.564	1095.41	37.1716	661.386	1062.45	30.8062	575.812	1012	170.947	375.926	901.066	-121.224	564.447	1233.95	237.926	252.215	722.785	387.025	159.505	689.349	367.948
168	1.67	354.997	700.54	430.076	503.553	1179.52	211.609	443.509	1119.55	35.9695	522.6	1242.82	166.094	622.399	665.821	399.848	650.224	1039.71	313.104	504.977	1170.75	102.853	574.648	1238.16	98.2804	346.391	707.65	357.011	516.04	1095.55	37.1303	661.472	1062.48	30.8259	575.802	1011.97	170.932	375.76	901.405	-120.962	564.416	1233.86	237.917	252.154	722.771	387.023	159.489	689.329	367.957
169	1.68	355	700.534	430.064	503.564	1179.53	211.661	443.992	1119.88	35.95	522.529	1242.69	166.091	622.399	665.837	399.845	650.257	1039.72	313.11	505.502	1171	102.972	574.488	1238.04	98.2675	346.35	707.665	357.038	516.455	1095.74	37.0521	661.549	1062.51	30.838	575.836	1011.96	170.909	375.605	901.748	-120.681	564.376	1233.78	237.879	252.202	722.772	387.014	159.491	689.327	367.975
170	1.69	355.027	700.536	430.049	503.595	1179.62	211.772	444.462	1120.22	35.878	522.482	1242.59	166.08	622.399	665.862	399.843	650.302	1039.75	313.12	505.916	1171.26	103.071	574.38	1237.92	98.2401	346.311	707.674	357.059	516.769	1095.93	36.9793	661.653	1062.55	30.8762	575.747	1012	170.912	375.465	902.128	-120.413	564.303	1233.75	237.848	252.261	722.781	387.011	159.497	689.333	367.967
171	1.7	355.005	700.543	430.055	503.605	1179.88	211.916	444.813	1120.58	35.7601	522.343	1242.51	166.052	622.361	665.861	399.89	650.285	1039.77	313.112	506.224	1171.51	103.158	574.245	1237.81	98.1943	346.209	707.717	357.047	517.002	1096.1	36.9466	661.718	1062.55	30.9343	575.639	1012.05	170.874	375.248	902.5	-120.174	564.219	1233.7	237.797	252.249	722.786	387.015	159.463	689.351	367.946
172	1.71	354.99	700.576	430.064	503.517	1179.88	211.963	445.151	1120.95	35.6696	522.261	1242.42	166.019	622.331	665.875	399.941	650.243	1039.78	313.114	506.496	1171.74	103.225	574.095	1237.71	98.1345	345.95	707.812	357.048	517.234	1096.32	36.943	661.82	1062.58	30.9912	575.579	1012.05	170.784	375.054	902.862	-119.972	564.153	1233.69	237.759	252.211	722.793	387.002	159.444	689.367	367.917
173	1.72	355.035	700.599	430.063	503.375	1179.68	211.965	445.581	1121.34	35.5817	522.255	1242.29	165.98	622.328	665.91	399.993	650.222	1039.8	313.113	506.741	1171.9	103.324	573.99	1237.61	98.0962	345.873	707.854	357.073	517.537	1096.56	36.9367	661.894	1062.57	31.0219	575.572	1012.01	170.724	374.936	903.215	-119.781	564.102	1233.66	237.714	252.225	722.796	386.984	159.485	689.374	367.89
174	1.73	355.06	700.602	430.062	503.218	1179.76	212.11	445.949	1121.74	35.5985	522.226	1242.17	165.959	622.358	665.96	400.085	650.212	1039.81	313.13	507.017	1172.03	103.435	573.866	1237.53	98.0736	345.908	707.834	357.037	517.843	1096.8	36.9449	662.001	1062.61	31.0676	575.578	1011.97	170.681	374.79	903.572	-119.561	564.087	1233.62	237.668	252.235	722.802	386.986	159.51	689.381	367.888
175	1.74	355.021	700.601	430.072	503.077	1179.95	212.264	446.231	1122.14	35.6602	522.104	1242.09	165.961	622.335	666.004	400.164	650.179	1039.85	313.152	507.257	1172.17	103.547	573.674	1237.48	98.0797	346.077	707.76	357.005	518.11	1097.03	36.9547	662.083	1062.63	31.1067	575.467	1011.99	170.67	374.613	903.937	-119.349	563.943	1233.57	237.65	252.231	722.819	386.993	159.489	689.374	367.893
176	1.75	354.981	700.582	430.079	502.88	1179.95	212.322	446.527	1122.52	35.6715	521.954	1242.05	165.99	622.304	666.049	400.219	650.116	1039.87	313.174	507.475	1172.3	103.652	573.488	1237.42	98.072	346.249	707.692	357.013	518.327	1097.24	36.9453	662.104	1062.63	31.1719	575.378	1012.01	170.679	374.404	904.305	-119.113	563.871	1233.48	237.655	252.178	722.83	387.003	159.461	689.361	367.905
177	1.76	354.953	700.577	430.107	502.721	1179.88	212.366	446.847	1122.88	35.6631	521.905	1241.98	166.021	622.296	666.099	400.254	650.104	1039.89	313.202	507.738	1172.43	103.788	573.352	1237.36	98.0668	346.278	707.69	357.058	518.555	1097.47	36.916	662.145	1062.62	31.1906	575.398	1011.99	170.664	374.239	904.636	-118.899	563.831	1233.38	237.651	252.181	722.823	387.007	159.44	689.378	367.928
178	1.77	354.933	700.592	430.112	502.562	1179.78	212.381	447.136	1123.16	35.6428	521.939	1241.86	166.036	622.338	666.134	400.32	650.11	1039.91	313.231	508.008	1172.56	103.951	573.223	1237.3	98.0903	346.249	707.699	357.088	518.823	1097.69	36.8925	662.336	1062.71	31.2948	575.408	1011.95	170.665	374.162	904.927	-118.72	563.754	1233.34	237.645	252.204	722.813	387.018	159.459	689.377	367.943
179	1.78	354.921	700.592	430.124	502.353	1179.68	212.361	447.363	1123.38	35.593	521.879	1241.72	166.022	622.335	666.144	400.366	650.065	1039.92	313.222	508.276	1172.69	104.076	573.104	1237.25	98.0921	346.283	707.691	357.074	519.043	1097.88	36.8563	662.534	1062.8	31.4673	575.369	1011.92	170.636	374.063	905.187	-118.578	563.79	1233.3	237.594	252.211	722.818	387.025	159.46	689.377	367.947
180	1.79	354.921	700.586	430.135	502.128	1179.46	212.308	447.58	1123.72	35.6128	521.764	1241.61	166.013	622.327	666.184	400.397	650.035	1039.92	313.184	508.458	1172.82	104.171	572.999	1237.22	98.0732	346.298	707.694	357.068	519.215	1098.08	36.7981	662.315	1062.62	31.3271	575.294	1011.91	170.571	373.947	905.43	-118.484	563.737	1233.26	237.583	252.215	722.794	386.994	159.481	689.358	367.927
181	1.8	354.977	700.598	430.127	501.984	1179.23	212.263	447.714	1123.96	35.6397	521.693	1241.5	166.058	622.308	666.181	400.42	650.037	1039.93	313.17	508.66	1172.95	104.269	572.869	1237.19	98.0902	346.324	707.689	357.055	519.408	1098.29	36.7624	662.292	1062.57	31.2859	575.266	1011.89	170.533	373.848	905.665	-118.383	563.766	1233.23	237.593	252.218	722.78	386.99	159.517	689.343	367.916
182	1.81	355.003	700.599	430.122	501.967	1179.34	212.32	447.838	1124.17	35.6719	521.729	1241.42	166.107	622.338	666.194	400.442	650.032	1039.95	313.181	508.857	1173.07	104.379	572.794	1237.15	98.1337	346.249	707.721	357.06	519.618	1098.47	36.7349	662.303	1062.54	31.2831	575.215	1011.89	170.542	373.748	905.891	-118.263	563.815	1233.18	237.589	252.247	722.774	386.995	159.535	689.353	367.927
183	1.82	354.978	700.587	430.129	501.843	1179.38	212.315	447.941	1124.33	35.6747	521.685	1241.35	166.161	622.333	666.216	400.465	650.002	1039.95	313.178	509.011	1173.18	104.453	572.686	1237.12	98.1658	346.021	707.814	357.058	519.749	1098.61	36.7174	662.332	1062.52	31.2875	575.143	1011.88	170.521	373.626	906.104	-118.186	563.706	1233.11	237.579	252.247	722.767	387.002	159.552	689.336	367.933
184	1.83	354.953	700.573	430.126	501.699	1179.4	212.296	448.043	1124.46	35.6701	521.648	1241.32	166.176	622.32	666.219	400.479	649.974	1039.96	313.157	509.158	1173.26	104.506	572.59	1237.1	98.1779	345.902	707.854	357.064	519.843	1098.71	36.6841	662.343	1062.51	31.303	575.131	1011.86	170.485	373.538	906.29	-118.156	563.639	1233.1	237.614	252.215	722.764	386.991	159.533	689.332	367.915
185	1.84	354.948	700.564	430.131	501.492	1179.46	212.25	448.138	1124.58	35.661	521.612	1241.3	166.207	622.302	666.223	400.459	649.957	1039.98	313.139	509.272	1173.34	104.558	572.488	1237.11	98.205	346.104	707.757	357.084	519.912	1098.8	36.6575	662.354	1062.51	31.2928	575.1	1011.85	170.456	373.474	906.461	-118.109	563.648	1233.08	237.646	252.208	722.786	386.978	159.484	689.355	367.888
186	1.85	354.948	700.569	430.132	501.343	1179.53	212.203	448.216	1124.68	35.664	521.589	1241.28	166.231	622.313	666.247	400.462	649.936	1039.99	313.132	509.385	1173.44	104.581	572.446	1237.11	98.2242	346.198	707.72	357.099	520.033	1098.89	36.6577	662.371	1062.51	31.2633	575.049	1011.85	170.417	373.403	906.575	-118.074	563.619	1233.07	237.647	252.2	722.807	386.979	159.476	689.371	367.89
187	1.86	354.953	700.594	430.129	501.175	1179.57	212.123	448.283	1124.78	35.6545	521.54	1241.27	166.262	622.337	666.297	400.491	649.915	1040	313.123	509.476	1173.53	104.58	572.444	1237.12	98.24	346.118	707.753	357.102	520.08	1098.98	36.6412	662.336	1062.49	31.2703	574.959	1011.87	170.375	373.366	906.664	-118.045	563.549	1233.04	237.645	252.217	722.816	386.991	159.46	689.386	367.888
188	1.87	354.934	700.611	430.124	501.073	1179.64	212.079	448.298	1124.85	35.6358	521.534	1241.26	166.296	622.352	666.311	400.485	649.888	1040.01	313.112	509.498	1173.62	104.56	572.408	1237.14	98.2551	345.989	707.816	357.07	520.091	1099.05	36.6103	662.301	1062.49	31.2551	574.893	1011.9	170.345	373.315	906.734	-118.034	563.505	1233.04	237.659	252.238	722.815	386.989	159.461	689.386	367.881
189	1.88	354.952	700.613	430.123	501.039	1179.71	212.029	448.309	1124.91	35.663	521.558	1241.26	166.341	622.343	666.291	400.467	649.892	1040.01	313.105	509.543	1173.73	104.527	572.362	1237.17	98.2879	346.094	707.789	357.063	520.101	1099.14	36.5843	662.306	1062.5	31.2285	574.9	1011.88	170.342	373.289	906.776	-118.001	563.529	1233.02	237.698	252.219	722.815	386.986	159.497	689.38	367.893
190	1.89	354.984	700.61	430.125	500.962	1179.75	211.962	448.325	1124.95	35.6802	521.547	1241.29	166.385	622.374	666.272	400.468	649.904	1040	313.108	509.606	1173.81	104.484	572.362	1237.2	98.309	346.272	707.73	357.056	520.081	1099.22	36.5553	662.314	1062.49	31.2298	574.896	1011.84	170.347	373.301	906.788	-117.951	563.569	1232.97	237.734	252.236	722.813	386.983	159.544	689.358	367.914
191	1.9	354.984	700.589	430.123	500.88	1179.86	211.863	448.309	1124.96	35.6537	521.528	1241.28	166.406	622.362	666.242	400.443	649.89	1039.99	313.1	509.609	1173.86	104.404	572.379	1237.22	98.3048	346.39	707.67	357.013	520.029	1099.28	36.523	662.303	1062.49	31.2494	574.862	1011.81	170.338	373.301	906.758	-117.922	563.551	1232.94	237.744	252.244	722.804	386.998	159.548	689.337	367.924
192	1.91	354.987	700.583	430.125	500.908	1179.98	211.805	448.251	1124.98	35.6208	521.501	1241.28	166.417	622.344	666.23	400.42	649.856	1039.98	313.107	509.571	1173.9	104.307	572.381	1237.25	98.3308	346.39	707.662	357.018	519.947	1099.25	36.4892	662.238	1062.48	31.2629	574.817	1011.8	170.352	373.242	906.695	-117.891	563.51	1232.94	237.766	252.252	722.791	387	159.524	689.325	367.925
193	1.92	354.992	700.576	430.121	500.974	1180.07	211.737	448.193	1124.95	35.5857	521.567	1241.3	166.429	622.34	666.233	400.388	649.85	1039.97	313.129	509.566	1173.94	104.21	572.379	1237.28	98.352	346.387	707.648	357.019	519.872	1099.18	36.4592	662.191	1062.49	31.2819	574.838	1011.78	170.375	373.223	906.601	-117.875	563.52	1232.94	237.777	252.253	722.784	387.006	159.517	689.329	367.924
194	1.93	354.97	700.57	430.105	501.025	1180.16	211.663	448.164	1124.9	35.5507	521.572	1241.34	166.432	622.399	666.247	400.344	649.871	1039.97	313.138	509.567	1173.93	104.101	572.385	1237.3	98.3809	346.281	707.694	357.077	519.823	1099.11	36.4437	662.137	1062.51	31.3187	574.831	1011.79	170.423	373.279	906.477	-117.882	563.542	1232.92	237.794	252.241	722.779	387.006	159.532	689.325	367.938
195	1.94	354.99	700.584	430.101	501.085	1180.25	211.598	448.061	1124.84	35.5036	521.543	1241.41	166.418	622.37	666.223	400.298	649.879	1039.96	313.154	509.545	1173.9	103.96	572.412	1237.32	98.3965	346.137	707.752	357.103	519.734	1098.98	36.4493	662.111	1062.53	31.3822	574.776	1011.81	170.441	373.303	906.351	-117.92	563.537	1232.92	237.831	252.236	722.773	387.019	159.508	689.348	367.929
196	1.95	354.992	700.591	430.089	501.156	1180.35	211.516	447.945	1124.74	35.4305	521.497	1241.46	166.379	622.326	666.18	400.28	649.85	1039.95	313.152	509.428	1173.86	103.795	572.453	1237.36	98.3729	345.958	707.817	357.083	519.574	1098.84	36.4251	662.027	1062.52	31.4319	574.715	1011.83	170.446	373.326	906.208	-118.007	563.506	1232.93	237.809	252.183	722.772	387.007	159.479	689.372	367.898
197	1.96	354.979	700.599	430.079	501.205	1180.44	211.442	447.812	1124.61	35.359	521.517	1241.49	166.349	622.334	666.176	400.235	649.847	1039.96	313.163	509.309	1173.78	103.652	572.506	1237.39	98.3455	345.972	707.815	357.062	519.391	1098.67	36.3785	661.927	1062.5	31.4651	574.675	1011.85	170.459	373.402	906.032	-118.137	563.463	1232.94	237.795	252.202	722.795	386.995	159.458	689.399	367.887
198	1.97	355.03	700.611	430.094	501.284	1180.51	211.388	447.661	1124.43	35.3157	521.569	1241.54	166.347	622.361	666.17	400.213	649.868	1039.96	313.198	509.172	1173.66	103.554	572.558	1237.41	98.358	346.023	707.802	357.066	519.198	1098.49	36.3569	661.837	1062.49	31.4986	574.741	1011.84	170.511	373.548	905.811	-118.283	563.498	1232.94	237.822	252.25	722.817	387.014	159.472	689.419	367.893
199	1.98	354.997	700.613	430.101	501.368	1180.55	211.332	447.469	1124.23	35.2867	521.572	1241.61	166.366	622.391	666.127	400.202	649.878	1039.94	313.254	508.897	1173.52	103.484	572.588	1237.44	98.3839	346.023	707.812	357.109	518.963	1098.3	36.362	661.757	1062.48	31.5869	574.776	1011.84	170.603	373.69	905.553	-118.44	563.462	1232.91	237.861	252.26	722.84	387.034	159.473	689.402	367.918
200	1.99	354.983	700.554	430.099	501.417	1180.61	211.265	447.208	1124	35.2382	521.606	1241.64	166.354	622.347	666.057	400.161	649.889	1039.91	313.301	508.588	1173.31	103.393	572.636	1237.46	98.3798	346.182	707.751	357.105	518.672	1098.08	36.3644	661.645	1062.43	31.6863	574.774	1011.85	170.684	373.774	905.272	-118.65	563.4	1232.92	237.884	252.252	722.813	387.025	159.47	689.373	367.928
201	2	355.017	700.523	430.097	501.493	1180.67	211.22	446.914	1123.71	35.1774	521.72	1241.58	166.325	622.348	665.99	400.117	649.927	1039.86	313.332	508.292	1173.06	103.28	572.699	1237.44	98.3587	346.281	707.708	357.071	518.383	1097.87	36.3539	661.579	1062.39	31.7339	574.924	1011.79	170.732	373.925	904.924	-118.937	563.393	1232.9	237.88	252.298	722.784	387.007	159.536	689.345	367.928
202	2.01	355.027	700.506	430.104	501.678	1180.76	211.155	446.451	1123.36	35.1218	521.751	1241.58	166.31	622.368	665.908	400.056	649.982	1039.81	313.359	507.902	1172.82	103.201	572.775	1237.45	98.3668	346.332	707.69	357.049	517.992	1097.64	36.3582	661.575	1062.38	31.778	575.088	1011.74	170.782	374.238	904.485	-119.271	563.419	1232.89	237.905	252.316	722.756	387.006	159.61	689.312	367.939
203	2.02	355.021	700.517	430.121	501.924	1180.88	211.066	445.793	1122.95	35.0471	521.735	1241.62	166.303	622.357	665.849	400.05	650.016	1039.78	313.413	507.41	1172.6	103.153	572.844	1237.48	98.3876	346.309	707.705	357.063	517.498	1097.36	36.4607	661.53	1062.33	31.8447	575.101	1011.76	170.855	374.592	903.991	-119.633	563.345	1232.89	237.94	252.291	722.757	387.024	159.603	689.307	367.956
204	2.03	355.003	700.535	430.135	502.149	1181.07	210.97	445.032	1122.58	34.9244	521.677	1241.63	166.269	622.367	665.798	400.04	650.033	1039.77	313.467	506.808	1172.37	103.078	572.88	1237.51	98.3751	346.248	707.74	357.097	516.875	1097.02	36.5994	661.482	1062.28	31.8949	575.095	1011.79	170.924	375.025	903.429	-120.049	563.292	1232.91	237.966	252.282	722.781	387.04	159.566	689.324	367.944
205	2.04	355.015	700.554	430.135	502.29	1181.37	210.87	444.271	1122.2	34.7618	521.651	1241.68	166.226	622.363	665.753	399.987	650.074	1039.76	313.508	506.121	1172.09	102.918	572.954	1237.55	98.3704	346.189	707.764	357.111	516.134	1096.66	36.7935	661.444	1062.26	31.9478	575.15	1011.83	170.999	375.54	902.81	-120.528	563.214	1232.95	237.984	252.255	722.798	387.043	159.551	689.364	367.918
206	2.05	355.044	700.564	430.132	502.263	1181.71	210.747	443.378	1121.75	34.6752	521.639	1241.78	166.197	622.355	665.721	399.959	650.144	1039.75	313.586	505.223	1171.77	102.722	573.028	1237.58	98.3904	346.749	707.257	357.489	515.268	1096.18	37.1353	661.369	1062.21	31.9666	575.196	1011.87	171.102	376.111	902.135	-121.015	563.155	1232.97	238.009	252.262	722.828	387.066	159.552	689.385	367.931
207	2.06	355.016	700.565	430.143	502.087	1181.93	210.532	442.285	1121.22	34.6195	521.653	1241.81	166.151	622.358	665.667	399.911	650.212	1039.73	313.661	504.09	1171.36	102.523	573.082	1237.58	98.4001	347.515	706.607	357.968	514.239	1095.58	37.5024	661.31	1062.14	32.005	575.181	1011.93	171.232	376.604	901.414	-121.511	563.037	1232.97	238.061	252.235	722.831	387.073	159.54	689.395	367.937
208	2.07	354.988	700.533	430.136	501.743	1182.26	210.297	441.263	1120.61	34.4212	521.633	1241.8	166.135	622.408	665.64	399.859	650.279	1039.68	313.721	502.811	1170.89	102.319	573.131	1237.56	98.4148	347.082	706.971	357.685	513.165	1094.95	37.7409	661.253	1062.07	32.0093	575.263	1011.91	171.322	377.206	900.564	-122.078	562.945	1232.96	238.104	252.226	722.834	387.085	159.527	689.394	367.939
209	2.08	355.023	700.511	430.133	501.106	1182.62	210.039	440.416	1119.96	34.0862	521.681	1241.75	166.118	622.435	665.559	399.837	650.354	1039.61	313.784	501.534	1170.35	102.161	573.202	1237.55	98.4254	347.63	706.518	357.98	512.139	1094.35	37.8788	661.184	1061.99	32.0082	575.406	1011.86	171.417	377.872	899.563	-122.702	562.862	1232.94	238.17	252.275	722.831	387.079	159.543	689.387	367.934
210	2.09	355.042	700.499	430.158	499.845	1182.97	209.797	439.49	1119.07	33.6715	521.72	1241.66	166.106	622.437	665.467	399.809	650.438	1039.53	313.866	500.123	1169.83	101.892	573.248	1237.52	98.4725	346.521	707.465	357.357	511.134	1093.74	37.9431	661.133	1061.93	32.0039	575.567	1011.8	171.492	378.553	898.453	-123.363	562.716	1232.95	238.248	252.296	722.815	387.086	159.579	689.379	367.935
211	2.1	355.046	700.469	430.173	498.04	1183.22	209.495	438.431	1118.02	33.2844	521.683	1241.6	166.14	622.435	665.362	399.802	650.523	1039.46	313.957	498.401	1169.33	101.459	573.263	1237.49	98.5494	346.891	707.168	357.56	510.002	1092.98	38.0611	661.086	1061.87	31.9928	575.676	1011.78	171.585	379.345	897.196	-124.081	562.6	1232.93	238.312	252.265	722.803	387.1	159.588	689.361	367.944
212	2.11	355.045	700.442	430.18	496.325	1183.56	209.072	437.112	1117.04	32.964	521.638	1241.53	166.176	622.446	665.21	399.797	650.583	1039.38	314.034	496.577	1168.75	101.043	573.311	1237.45	98.6039	348.314	706.009	358.306	508.806	1092.16	38.3015	661.047	1061.82	31.9772	575.78	1011.78	171.687	380.277	895.783	-124.85	562.545	1232.88	238.39	252.266	722.778	387.102	159.609	689.353	367.94
213	2.12	355.073	700.412	430.178	494.001	1184.01	208.508	435.546	1115.92	32.6248	521.676	1241.4	166.173	622.397	665.071	399.773	650.639	1039.27	314.121	494.608	1168.17	100.706	573.406	1237.42	98.6598	348.695	705.717	358.471	507.571	1091.32	38.5255	660.958	1061.75	31.9255	575.918	1011.8	171.762	381.242	894.291	-125.585	562.469	1232.87	238.474	252.315	722.783	387.101	159.627	689.342	367.939
214	2.13	355.107	700.409	430.203	491.26	1184	207.866	434.011	1114.61	32.1498	521.719	1241.31	166.218	622.353	664.937	399.744	650.693	1039.15	314.236	492.336	1167.56	100.34	573.472	1237.39	98.7436	348.792	705.667	358.504	506.151	1090.34	38.6307	660.846	1061.65	31.8625	576.007	1011.84	171.867	382.257	892.53	-126.301	562.4	1232.83	238.545	252.361	722.777	387.118	159.668	689.332	367.961
215	2.14	355.101	700.389	430.225	488.314	1184.11	207.42	432.537	1113.38	31.5154	521.713	1241.21	166.271	622.31	664.795	399.743	650.749	1039.04	314.367	489.937	1166.79	99.962	573.527	1237.34	98.8619	348.779	705.676	358.53	504.5	1089.23	38.7612	660.746	1061.54	31.7802	576.056	1011.91	171.977	383.282	890.667	-126.987	562.984	1232.75	238.399	252.34	722.792	387.135	159.673	689.333	367.97
216	2.15	355.072	700.385	430.214	485.025	1184.38	206.878	430.923	1112.05	30.7784	521.73	1241.13	166.323	622.21	664.622	399.718	650.761	1038.94	314.478	487.359	1165.94	99.5303	573.607	1237.31	98.949	348.774	705.69	358.514	502.897	1088.1	38.922	660.637	1061.44	31.6586	576.11	1011.98	172.072	384.42	888.767	-127.73	564.508	1232.63	237.941	252.324	722.826	387.151	159.648	689.353	367.967
217	2.16	355.07	700.374	430.201	481.386	1184.56	206.105	429.069	1110.6	30.0267	521.704	1241.02	166.382	622.138	664.461	399.672	650.76	1038.83	314.582	484.609	1165.1	99.0156	573.658	1237.27	99.042	348.773	705.681	358.49	501.267	1086.98	39.1377	660.503	1061.34	31.4987	576.072	1012.04	172.165	385.622	886.631	-128.394	564.831	1232.53	237.879	252.331	722.856	387.158	159.612	689.377	367.963
218	2.17	355.053	700.375	430.178	477.479	1184.91	205.256	427.127	1109.08	29.2434	521.754	1240.92	166.434	622.11	664.335	399.654	650.756	1038.73	314.687	481.747	1164.13	98.4312	573.698	1237.2	99.1658	348.733	705.664	358.479	499.222	1085.68	39.4708	660.601	1061.39	31.3348	576.124	1012.06	172.25	386.927	884.412	-129.012	564.922	1232.45	237.894	252.286	722.861	387.14	159.563	689.397	367.937
219	2.18	355.058	700.38	430.19	473.174	1185.36	204.401	425.19	1107.44	28.2953	521.769	1240.83	166.503	622.054	664.22	399.658	650.764	1038.63	314.807	478.745	1163.03	97.8272	573.772	1237.17	99.281	348.696	705.683	358.472	496.922	1084.24	39.8091	660.975	1061.63	31.2079	576.182	1012.06	172.362	388.305	882.018	-129.695	564.94	1232.38	237.955	252.252	722.857	387.138	159.548	689.394	367.913
220	2.19	355.047	700.38	430.19	468.656	1185.48	203.518	423.053	1105.69	27.3069	521.835	1240.71	166.569	622.013	664.118	399.649	650.76	1038.53	314.929	475.305	1161.85	97.2311	573.825	1237.11	99.4054	348.64	705.69	358.488	494.709	1082.75	40.0936	660.893	1061.49	31.0973	576.275	1012.04	172.484	389.759	879.434	-130.389	564.876	1232.32	238.042	252.239	722.834	387.141	159.535	689.393	367.91
221	2.2	355.05	700.364	430.192	464.095	1185.23	202.418	420.952	1103.81	26.1909	522.01	1240.55	166.634	621.966	663.993	399.627	650.776	1038.41	315.063	471.878	1160.58	96.5745	574.037	1237.01	99.5209	348.653	705.69	358.523	492.377	1081.11	40.4166	660.647	1061.2	30.9734	576.426	1012	172.618	391.222	876.792	-131.108	564.849	1232.24	238.133	252.216	722.802	387.125	159.54	689.377	367.924
222	2.21	355.079	700.328	430.2	458.58	1184.9	201.215	418.606	1101.85	25.0416	522.226	1240.43	166.685	621.966	663.909	399.613	650.846	1038.29	315.18	468.21	1159.2	95.7831	574.512	1236.67	99.5465	348.687	705.702	358.504	489.784	1079.39	40.6497	660.412	1060.95	30.8318	576.703	1011.92	172.741	392.817	874.015	-131.866	564.844	1232.17	238.213	252.24	722.773	387.106	159.596	689.349	367.916
223	2.22	355.067	700.31	430.2	452.964	1184.47	199.896	415.96	1099.72	23.9314	522.29	1240.37	166.791	621.954	663.836	399.581	650.841	1038.18	315.322	464.134	1157.82	94.9114	574.872	1236.2	99.4135	348.686	705.706	358.514	487.11	1077.71	40.8629	660.169	1060.69	30.6933	576.789	1011.92	172.909	394.454	871.128	-132.567	564.908	1232.14	238.299	252.275	722.782	387.118	159.643	689.332	367.918
224	2.23	355.085	700.297	430.215	447.298	1183.94	198.571	413.302	1097.55	22.7295	522.246	1240.41	166.949	621.93	663.753	399.549	650.667	1038	315.478	459.941	1156.33	94.1086	574.557	1236.01	99.2179	348.732	705.676	358.528	484.282	1076.02	40.8706	659.886	1060.46	30.5418	576.631	1012.03	173.141	396.198	868.15	-133.313	564.962	1232.08	238.406	252.276	722.841	387.183	159.627	689.338	367.956
225	2.24	355.118	700.28	430.255	441.252	1183.45	197.21	410.862	1095.11	21.1944	522.184	1240.44	167.102	621.884	663.685	399.52	650.679	1037.97	315.661	455.542	1154.69	93.2013	574.054	1236.3	99.3014	348.763	705.674	358.522	481.298	1074.2	40.8669	659.592	1060.26	30.3703	576.413	1012.11	173.394	398.013	865.044	-134.058	565.035	1232.05	238.516	252.309	722.872	387.22	159.621	689.341	367.999
226	2.25	355.133	700.271	430.289	434.812	1182.46	195.788	408.206	1092.52	19.6135	522.253	1240.44	167.176	621.889	663.658	399.514	651.101	1038.29	315.815	450.943	1152.96	92.1746	574.157	1236.87	99.8457	348.742	705.708	358.523	478.222	1072.36	40.8259	659.329	1060.09	30.1903	576.01	1012.07	173.66	399.904	861.928	-134.836	565.145	1232.06	238.655	252.322	722.875	387.244	159.629	689.345	367.997
227	2.26	355.116	700.247	430.283	428.552	1181.23	194.376	404.937	1090	18.2388	522.426	1240.38	167.21	621.912	663.613	399.54	651.265	1038.36	315.942	446.236	1151.06	91.0853	574.614	1236.9	100.151	348.702	705.735	358.564	474.979	1070.44	40.6953	659.052	1059.91	29.9911	575.299	1012.27	174.036	401.909	858.652	-135.646	565.209	1232.06	238.793	252.31	722.85	387.25	159.624	689.36	367.991
228	2.27	355.09	700.248	430.309	421.987	1179.92	192.719	401.605	1087.27	16.8979	522.546	1240.34	167.282	621.901	663.556	399.564	651.363	1038.35	316.067	441.333	1149.02	89.9048	574.794	1236.86	100.297	348.729	705.714	358.605	471.551	1068.41	40.4862	658.767	1059.75	29.7716	574.41	1012.97	174.513	403.922	855.37	-136.404	565.271	1232.06	238.968	252.287	722.828	387.232	159.63	689.361	367.986
229	2.28	355.118	700.246	430.331	415.012	1178.44	190.835	397.86	1084.39	15.6151	522.579	1240.34	167.392	621.916	663.517	399.565	651.435	1038.33	316.185	436.252	1146.84	88.6534	574.91	1236.84	100.404	348.756	705.696	358.608	468.103	1066.41	40.1891	658.46	1059.58	29.5254	574.122	1013.15	174.769	406.123	852.084	-137.178	565.48	1232.08	239.127	252.301	722.817	387.231	159.655	689.379	367.964
230	2.29	355.114	700.233	430.359	407.763	1176.79	188.846	394.23	1081.34	14.1589	522.587	1240.34	167.488	621.915	663.472	399.59	651.52	1038.32	316.303	430.985	1144.45	87.2772	575.025	1236.86	100.494	348.703	705.714	358.647	464.396	1064.13	39.9453	658.091	1059.34	29.2327	573.933	1013.23	174.994	408.354	848.641	-138.048	565.578	1232.11	239.306	252.321	722.835	387.256	159.643	689.407	367.944
231	2.3	355.067	700.246	430.385	400.509	1174.92	186.752	390.674	1078.18	12.556	522.595	1240.38	167.593	621.909	663.428	399.643	651.573	1038.29	316.423	425.608	1141.94	85.7736	575.11	1236.86	100.602	348.615	705.761	358.696	460.748	1061.76	39.6582	657.69	1059.09	28.9436	573.781	1013.27	175.168	410.758	845.242	-139.038	565.692	1232.13	239.491	252.29	722.836	387.272	159.622	689.428	367.933
232	2.31	355.047	700.223	430.409	392.638	1172.58	184.647	386.947	1074.84	10.9325	522.597	1240.44	167.731	621.875	663.371	399.672	651.599	1038.24	316.534	420.019	1139.28	84.2454	575.155	1236.86	100.706	348.619	705.743	358.728	456.819	1059.21	39.2806	657.251	1058.85	28.6326	573.83	1013.22	175.288	413.262	841.774	-139.933	565.871	1232.1	239.687	252.275	722.837	387.268	159.614	689.409	367.917
233	2.32	355.059	700.203	430.435	384.908	1170.08	182.166	383.404	1071.29	9.02657	522.636	1240.43	167.882	621.879	663.338	399.725	651.666	1038.2	316.65	414.207	1136.43	82.6435	575.229	1236.87	100.81	348.662	705.713	358.75	452.701	1056.55	38.7827	656.906	1058.59	28.3203	574.02	1013.09	175.377	416.217	838.385	-140.715	566.071	1232.08	239.859	252.305	722.84	387.288	159.663	689.393	367.929
234	2.33	355.047	700.189	430.477	376.975	1167.32	179.706	379.846	1067.61	6.96322	522.692	1240.43	168.037	621.908	663.289	399.783	651.699	1038.16	316.782	408.523	1133.42	80.947	575.258	1236.87	100.928	348.588	705.758	358.776	448.653	1053.7	38.2633	656.571	1058.27	28.0353	574.071	1013.01	175.479	419.715	835.349	-141.655	566.245	1232.07	240.046	252.325	722.836	387.302	159.718	689.361	367.959
235	2.34	355.05	700.169	430.524	368.839	1164.3	177.005	376.231	1063.79	4.85911	522.813	1240.42	168.185	621.859	663.223	399.818	651.721	1038.11	316.919	402.806	1130.16	79.1543	575.287	1236.85	101.069	348.487	705.816	358.821	444.524	1050.75	37.6518	656.077	1057.89	27.6901	574.035	1012.95	175.597	422.677	831.965	-142.622	566.35	1232.07	240.238	252.316	722.834	387.318	159.731	689.34	367.98
236	2.35	355.088	700.165	430.55	360.606	1161.06	174.093	372.708	1059.8	2.62795	522.971	1240.44	168.356	621.824	663.177	399.85	651.768	1038.08	317.04	396.961	1126.76	77.0837	575.354	1236.85	101.194	348.477	705.824	358.832	440.378	1047.74	36.8941	655.518	1057.65	27.3119	574.128	1012.85	175.683	425.573	828.493	-143.532	566.401	1232.12	240.383	252.314	722.83	387.322	159.744	689.342	367.979
237	2.36	355.098	700.158	430.576	352.199	1157.58	170.987	368.91	1055.7	0.46108	523.128	1240.42	168.54	621.864	663.173	399.881	651.82	1038.04	317.125	390.979	1123.23	74.9049	575.432	1236.88	101.299	348.503	705.817	358.829	436.134	1044.61	35.9516	655.191	1057.41	27.0115	574.28	1012.75	175.742	428.522	824.944	-144.473	566.514	1232.12	240.526	252.356	722.838	387.324	159.773	689.348	367.973
238	2.37	355.076	700.157	430.61	343.945	1153.88	167.585	365.034	1051.37	-1.84446	523.109	1240.45	168.717	621.862	663.163	399.904	651.987	1038.08	317.167	384.934	1119.53	72.574	575.429	1236.91	101.447	348.494	705.826	358.825	431.708	1041.4	34.9674	654.863	1057.16	26.7052	574.272	1012.71	175.768	431.518	821.368	-145.435	566.548	1232.12	240.629	252.333	722.848	387.34	159.73	689.373	367.974
239	2.38	355.068	700.16	430.615	335.751	1150.15	163.939	361.342	1046.72	-4.36518	523.079	1240.5	168.887	621.85	663.134	399.953	652.175	1038.09	317.185	378.725	1115.67	69.9044	575.456	1236.97	101.576	348.457	705.844	358.839	427.36	1038.06	33.7722	654.521	1056.96	26.3213	575.233	1012.48	175.49	435.128	817.64	-146.407	566.557	1232.13	240.772	252.296	722.857	387.367	159.723	689.392	367.962
240	2.39	355.071	700.155	430.623	327.336	1146.3	160.126	357.476	1041.89	-6.90402	523.181	1240.49	169.049	621.858	663.099	399.99	651.83	1037.8	317.268	372.548	1111.68	67.0415	575.499	1237.01	101.671	348.447	705.866	358.841	422.809	1034.54	32.426	654.188	1056.79	25.8975	577.193	1011.86	174.887	439.151	813.671	-147.453	566.55	1232.12	240.903	252.354	722.856	387.353	159.722	689.415	367.944
241	2.4	355.064	700.156	430.593	318.84	1142.06	156.117	353.399	1036.9	-9.39431	523.3	1240.44	169.17	621.915	663.116	400.043	651.718	1037.67	317.304	366.256	1107.46	63.9028	575.551	1237.03	101.766	348.466	705.874	358.834	418.411	1031.12	30.8153	653.806	1056.62	25.4161	576.913	1011.49	174.937	442.208	810.157	-148.288	566.585	1232.12	240.981	252.394	722.863	387.328	159.721	689.432	367.927
242	2.41	355.027	700.156	430.59	310.639	1137.5	151.883	349.492	1031.68	-12.1448	523.303	1240.42	169.317	621.949	663.109	400.065	651.661	1037.62	317.343	359.885	1103.13	60.6011	575.531	1237.05	101.866	348.484	705.874	358.834	414.059	1027.58	29.0781	653.431	1056.4	24.9041	576.685	1011.36	174.959	445.274	806.618	-148.882	566.577	1232.09	241.075	252.352	722.878	387.33	159.728	689.417	367.913
243	2.42	355.043	700.153	430.622	302.488	1132.88	147.493	345.527	1026.3	-14.9753	523.146	1240.48	169.502	621.97	663.059	400.091	651.609	1037.59	317.396	353.473	1098.58	57.1257	575.509	1237.1	102.002	348.541	705.845	358.839	409.535	1024.02	27.1773	653.067	1056.15	24.4646	576.561	1011.35	174.98	448.367	803.163	-149.414	566.601	1232.04	241.205	252.322	722.858	387.354	159.729	689.403	367.92
244	2.43	355.116	700.128	430.644	294.306	1127.97	142.952	341.7	1020.81	-17.9054	523.13	1240.49	169.667	621.993	663.031	400.118	651.574	1037.56	317.445	347.048	1093.87	53.4577	575.501	1237.12	102.138	348.539	705.832	358.851	405.013	1020.22	25.2265	652.702	1055.83	24.0628	576.556	1011.29	174.99	451.604	799.864	-149.94	566.622	1232.01	241.327	252.375	722.847	387.362	159.744	689.4	367.946
245	2.44	355.109	700.12	430.641	286.149	1122.89	138.205	338.026	1015.3	-20.9407	523.187	1240.47	169.792	622.005	663.014	400.113	651.531	1037.52	317.47	340.761	1088.99	49.7766	575.532	1237.13	102.248	348.504	705.829	358.855	400.584	1016.32	23.1648	652.303	1055.42	23.6549	576.573	1011.19	174.976	455.239	796.889	-150.174	566.63	1231.98	241.433	252.36	722.84	387.352	159.74	689.391	367.959
246	2.45	355.068	700.102	430.629	277.845	1117.65	133.065	334.418	1009.63	-24.0735	523.263	1240.42	169.871	622	662.999	400.12	651.452	1037.47	317.475	334.595	1083.92	45.9741	575.556	1237.12	102.328	348.575	705.781	358.84	396.105	1012.18	21.0759	651.927	1055.11	23.2499	576.57	1011.07	174.952	458.725	793.828	-150.508	566.623	1231.94	241.495	252.312	722.828	387.335	159.706	689.38	367.962
247	2.46	355.05	700.085	430.648	269.453	1112.01	127.809	330.938	1004	-27.2697	523.314	1240.38	169.954	621.956	662.973	400.123	651.364	1037.43	317.49	328.606	1078.62	42.0806	575.585	1237.11	102.409	348.482	705.825	358.85	391.559	1007.86	19.1198	651.651	1054.93	22.8764	576.559	1010.97	174.909	462.093	790.689	-150.847	566.635	1231.9	241.572	252.319	722.836	387.335	159.716	689.375	367.961
248	2.47	355.025	700.092	430.657	261.145	1106.24	122.325	327.637	998.345	-30.5795	523.338	1240.39	170.041	621.984	662.974	400.12	651.322	1037.4	317.501	322.719	1073.27	38.1162	575.616	1237.12	102.494	348.476	705.832	358.848	387.142	1003.43	17.0542	651.262	1054.68	22.504	576.54	1010.91	174.88	465.49	787.61	-151.221	566.037	1231.94	241.826	252.332	722.836	387.355	159.737	689.373	367.984
249	2.48	355.039	700.088	430.633	252.853	1100.21	116.676	324.705	992.646	-34.0671	523.297	1240.4	170.129	622.004	662.951	400.093	651.272	1037.37	317.494	316.983	1067.69	34.1628	575.613	1237.14	102.586	348.524	705.807	358.839	382.849	998.712	14.9523	650.837	1054.43	22.1012	576.439	1010.88	174.864	468.861	784.464	-151.561	564.662	1232.04	242.313	252.287	722.847	387.372	159.712	689.377	368.002
250	2.49	355.038	700.098	430.599	244.801	1093.83	110.752	321.833	986.771	-37.7157	523.308	1240.39	170.17	621.966	662.913	400.067	651.202	1037.34	317.477	311.463	1061.91	30.0043	575.588	1237.18	102.629	348.504	705.82	358.845	378.626	993.823	12.7344	650.403	1054.17	21.6666	576.372	1010.82	174.78	472.346	781.379	-151.904	564.288	1232.05	242.444	252.258	722.85	387.371	159.703	689.359	367.992
251	2.5	355.034	700.128	430.622	237.004	1087.19	104.605	318.929	980.737	-41.4168	523.317	1240.39	170.165	621.879	662.861	400.014	651.153	1037.31	317.453	306.054	1055.89	25.6693	575.639	1237.21	102.64	348.479	705.842	358.834	374.326	988.759	10.4029	649.967	1053.9	21.2274	576.32	1010.75	174.707	475.993	778.434	-152.224	564.79	1232.02	242.28	252.309	722.858	387.365	159.707	689.365	367.965
252	2.51	355.057	700.133	430.651	229.329	1080.37	98.4404	316.192	974.646	-45.0932	523.288	1240.41	170.178	621.845	662.809	399.973	651.135	1037.29	317.443	300.724	1049.78	21.2953	575.666	1237.24	102.662	348.506	705.83	358.842	370.051	983.501	8.0262	649.688	1053.64	20.8088	576.274	1010.71	174.647	479.504	775.526	-152.653	565.528	1231.96	242.048	252.348	722.845	387.36	159.723	689.389	367.958
253	2.52	355.094	700.145	430.619	221.774	1073.32	92.3706	313.389	968.439	-48.8168	523.172	1240.46	170.221	621.872	662.762	399.922	651.124	1037.29	317.445	295.658	1043.44	16.7008	575.625	1237.27	102.707	348.488	705.853	358.856	366.025	978.17	5.48765	649.515	1053.41	20.4283	576.154	1010.75	174.614	483.001	772.793	-153.092	564.447	1232.05	242.405	252.337	722.847	387.37	159.7	689.424	367.953
254	2.53	355.12	700.141	430.58	214.648	1066.13	86.1248	310.506	962.131	-52.7144	523.051	1240.48	170.233	621.874	662.719	399.873	651.09	1037.28	317.442	290.712	1036.87	11.9928	575.6	1237.28	102.735	348.511	705.841	358.844	362.069	972.773	2.80624	649.351	1053.17	20.0779	576.026	1010.75	174.528	486.424	770.003	-153.427	564.85	1231.97	242.301	252.349	722.86	387.377	159.699	689.438	367.948
255	2.54	355.155	700.111	430.572	207.689	1058.56	79.8819	307.688	955.796	-56.7041	523.059	1240.46	170.23	621.853	662.68	399.831	651.069	1037.27	317.424	285.653	1030.15	7.96152	575.589	1237.28	102.738	348.566	705.811	358.822	357.973	967.221	0.18224	649.058	1052.86	19.7057	575.968	1010.68	174.451	490.056	767.387	-153.694	565.549	1231.86	242.06	252.415	722.851	387.367	159.732	689.418	367.934
256	2.55	355.154	700.095	430.576	201.104	1050.59	73.7337	305.445	949.426	-60.5491	523.063	1240.4	170.245	621.869	662.679	399.771	651.034	1037.28	317.416	281.145	1023.11	4.3254	575.577	1237.24	102.762	348.629	705.77	358.808	353.918	961.447	-2.35354	648.67	1052.5	19.3153	575.94	1010.58	174.416	493.575	764.752	-154.108	564.38	1231.93	242.387	252.423	722.841	387.355	159.784	689.39	367.943
257	2.56	355.13	700.087	430.563	194.712	1042.58	67.3887	303.954	943.012	-64.0171	523.007	1240.35	170.256	621.888	662.681	399.711	650.986	1037.28	317.436	276.351	1016.07	0.10858	575.511	1237.23	102.819	348.664	705.734	358.801	350.326	955.579	-4.99959	648.268	1052.14	18.9109	575.865	1010.51	174.4	497.089	762.264	-154.598	564.131	1231.91	242.478	252.351	722.842	387.359	159.779	689.368	367.965
258	2.57	355.117	700.066	430.567	188.2	1034.19	60.9257	302.268	936.575	-67.7161	522.923	1240.31	170.282	621.855	662.678	399.644	650.935	1037.27	317.454	271.588	1008.91	-4.31653	575.448	1237.21	102.846	348.637	705.733	358.815	346.862	949.684	-7.66925	647.839	1051.8	18.5175	575.798	1010.42	174.381	500.528	759.761	-155.03	564.65	1231.79	242.302	252.322	722.828	387.376	159.74	689.358	367.98
259	2.58	355.098	700.055	430.59	181.851	1025.63	54.4756	300.44	930.389	-71.42	522.915	1240.22	170.271	621.787	662.665	399.579	650.88	1037.26	317.454	267.175	1001.81	-8.78582	575.412	1237.17	102.826	348.666	705.73	358.802	343.468	943.774	-10.2558	647.382	1051.48	18.1505	575.78	1010.32	174.349	504.122	757.451	-155.39	565.355	1231.66	242.054	252.332	722.8	387.374	159.756	689.34	367.978
[truncated: 710 more rows]

## Sheet: Trial02
PathFileType	4	(X/Y/Z)	Trial02.trc
DataRate	CameraRate	NumFrames	NumMarkers	Units	OrigDataRate	OrigDataStartFrame	OrigNumFrames
100	100	976	16	mm	100	1	976
[truncated: 978 more rows]

## Sheet: Trial03
PathFileType	4	(X/Y/Z)	Trial03.trc
[truncated: 1,130 more rows]

## Sheet: Trial04
PathFileType	4	(X/Y/Z)	Trial04.trc
[truncated: 1,052 more rows]
