# Supplementary material for: Upper-Limb Kinematic Variables are correlated with Fugl-Meyer Assessment Sub Scales During a Hand-to-Mouth Functional Task in Post-Stroke Individuals
Source: Research Square preprint supplement (doi:10.21203/rs.3.rs-8270137/v1), 2025-12-16
Supplement: Supplementary file 31 [file Additional file 6.xls]

## Sheet: Static
PathFileType	4	(X/Y/Z)	Static.trc
DataRate	CameraRate	NumFrames	NumMarkers	Units	OrigDataRate	OrigDataStartFrame	OrigNumFrames
100	100	688	17	mm	100	1	688
Frame#	Time	nasion			r zyg pr			l zyg pr			r should			l should			sternum			r elbow			r ulna			r radius			r hand			r finger			l elbow			l ulna			l radius			l hand			l finger
		X1	Y1	Z1	X2	Y2	Z2	X3	Y3	Z3	X4	Y4	Z4	X5	Y5	Z5	X6	Y6	Z6	X7	Y7	Z7	X8	Y8	Z8	X9	Y9	Z9	X10	Y10	Z10	X11	Y11	Z11	X12	Y12	Z12	X13	Y13	Z13	X14	Y14	Z14	X15	Y15	Z15	X16	Y16	Z16
1	0	630.58	1341.19	145.004	667.237	1330.35	76.221	677.762	1343.33	206.934	745.996	1154.38	-5.36825	778.921	1172.71	310.446	686.838	1128.86	163.742	738.765	794.195	-90.5156	469.88	849.439	-36.7951	491.667	850.57	36.6043	399.396	845.742	13.1445	303.734	821.536	5.32707	775.368	804.897	414.316	508.969	826.168	433.256	514.904	849.772	362.641	426.077	849.038	394.257	320.561	821.441	368.775
2	0.01	630.734	1341.1	145.035	667.294	1330.31	76.1976	677.762	1343.31	206.925	745.996	1154.17	-5.44113	778.966	1172.72	310.446	686.939	1128.84	163.741	738.905	793.991	-90.4194	469.987	849.176	-36.781	491.783	850.43	36.595	399.533	845.657	13.0868	303.783	821.518	5.29098	775.34	804.925	414.322	508.991	826.149	433.254	514.915	849.769	362.673	426.152	848.983	394.257	320.635	821.367	368.753
3	0.02	630.834	1341.04	145.055	667.341	1330.28	76.1809	677.798	1343.3	206.906	745.988	1154	-5.49174	778.983	1172.73	310.438	686.935	1128.84	163.722	739.029	793.786	-90.3147	470.065	848.964	-36.7807	491.896	850.339	36.5831	399.637	845.587	13.0539	303.814	821.492	5.28891	775.361	804.958	414.362	508.967	826.134	433.252	514.944	849.757	362.675	426.176	848.958	394.243	320.661	821.317	368.715
4	0.03	630.868	1340.98	145.052	667.399	1330.25	76.1572	677.835	1343.31	206.888	745.992	1153.88	-5.54499	778.992	1172.76	310.404	686.839	1128.87	163.737	739.13	793.62	-90.2114	470.131	848.77	-36.7746	491.974	850.254	36.5982	399.631	845.646	13.1017	303.845	821.499	5.27025	775.377	804.989	414.384	508.942	826.139	433.25	514.88	849.844	362.759	426.18	848.929	394.226	320.642	821.295	368.685
5	0.04	630.808	1340.99	145.07	667.394	1330.24	76.1462	677.877	1343.32	206.889	745.974	1153.77	-5.5912	779.034	1172.79	310.338	686.848	1128.88	163.715	739.221	793.434	-90.124	470.191	848.602	-36.7733	491.984	850.192	36.629	399.577	845.737	13.1732	303.871	821.514	5.24461	775.4	805.037	414.383	508.974	826.162	433.257	514.721	849.939	362.842	426.167	848.944	394.223	320.639	821.301	368.676
6	0.05	630.808	1341.02	145.09	667.349	1330.27	76.1594	677.937	1343.34	206.87	745.968	1153.68	-5.64922	779.039	1172.81	310.358	686.939	1128.84	163.679	739.3	793.237	-90.0155	470.242	848.446	-36.7645	492.014	850.125	36.6613	399.732	845.566	13.0683	303.873	821.545	5.23064	775.376	805.057	414.39	508.999	826.167	433.254	514.831	849.8	362.707	426.158	848.961	394.221	320.623	821.322	368.68
7	0.06	630.895	1341.05	145.087	667.329	1330.28	76.1619	677.989	1343.35	206.855	745.974	1153.58	-5.71743	779.04	1172.8	310.347	686.96	1128.82	163.683	739.428	793.048	-89.9178	470.334	848.302	-36.7349	492.03	850.04	36.7089	399.754	845.583	13.1181	303.896	821.592	5.2407	775.387	805.074	414.401	508.965	826.15	433.247	514.834	849.764	362.647	426.17	848.975	394.226	320.613	821.346	368.695
8	0.07	630.946	1341.12	145.078	667.332	1330.3	76.158	678.071	1343.37	206.848	746.01	1153.48	-5.76662	779.044	1172.76	310.351	686.931	1128.8	163.694	739.567	792.899	-89.8501	470.433	848.167	-36.7136	492.071	849.949	36.7195	399.773	845.635	13.1667	303.94	821.612	5.25239	775.423	805.071	414.413	508.955	826.143	433.241	514.923	849.773	362.659	426.172	848.993	394.233	320.639	821.367	368.707
9	0.08	630.91	1341.15	145.089	667.293	1330.32	76.1574	678.176	1343.4	206.838	746.016	1153.38	-5.8133	779.051	1172.74	310.318	686.827	1128.81	163.682	739.696	792.784	-89.7906	470.475	848.058	-36.7011	492.133	849.856	36.6945	399.951	845.465	13.0446	303.965	821.633	5.23926	775.412	805.038	414.406	508.994	826.146	433.244	514.982	849.783	362.66	426.194	848.994	394.234	320.646	821.381	368.72
10	0.09	630.91	1341.16	145.075	667.291	1330.35	76.1392	678.232	1343.41	206.812	746.032	1153.3	-5.88841	779.112	1172.73	310.28	686.847	1128.82	163.662	739.724	792.606	-89.7366	470.529	847.957	-36.7043	492.168	849.806	36.6861	399.957	845.483	13.06	304.027	821.644	5.21682	775.403	805.002	414.403	509.025	826.154	433.243	514.926	849.836	362.722	426.214	848.996	394.242	320.664	821.384	368.729
11	0.1	630.966	1341.17	145.061	667.315	1330.34	76.0961	678.275	1343.42	206.771	746.065	1153.23	-5.97728	779.176	1172.72	310.259	686.699	1128.87	163.656	739.756	792.451	-89.6812	470.615	847.85	-36.7225	492.233	849.774	36.6737	399.948	845.627	13.1251	304.078	821.656	5.18636	775.406	804.98	414.413	509.022	826.154	433.214	514.815	849.931	362.809	426.225	849.001	394.232	320.687	821.393	368.717
12	0.11	630.999	1341.16	145.025	667.334	1330.31	76.0548	678.329	1343.42	206.737	746.085	1153.15	-6.051	779.233	1172.73	310.221	686.718	1128.85	163.643	739.807	792.318	-89.6416	470.683	847.736	-36.7442	492.272	849.74	36.6628	399.983	845.627	13.145	304.086	821.657	5.17108	775.434	804.998	414.421	509.018	826.175	433.207	514.937	849.817	362.687	426.274	848.981	394.209	320.691	821.378	368.696
13	0.12	631.094	1341.08	144.997	667.356	1330.27	75.99	678.401	1343.39	206.712	746.106	1153.06	-6.1241	779.272	1172.75	310.185	686.789	1128.84	163.641	739.824	792.196	-89.6112	470.726	847.594	-36.7576	492.262	849.704	36.6606	400.059	845.542	13.0739	304.075	821.638	5.15945	775.411	805.008	414.406	509.03	826.173	433.226	514.865	849.84	362.726	426.273	848.959	394.195	320.706	821.338	368.68
14	0.13	631.15	1341.03	144.982	667.403	1330.23	75.9216	678.431	1343.36	206.664	746.136	1152.97	-6.20825	779.272	1172.74	310.146	686.894	1128.77	163.596	739.831	792.062	-89.5971	470.776	847.456	-36.7898	492.288	849.623	36.6459	400.121	845.419	12.9867	304.116	821.597	5.14219	775.393	805.035	414.402	509.057	826.167	433.221	514.672	849.955	362.872	426.284	848.918	394.167	320.722	821.312	368.661
15	0.14	631.208	1340.98	144.97	667.441	1330.19	75.8849	678.475	1343.35	206.624	746.164	1152.88	-6.29022	779.276	1172.73	310.099	686.951	1128.68	163.549	739.852	791.955	-89.5802	470.815	847.336	-36.8104	492.324	849.551	36.6488	400.118	845.483	13.0396	304.128	821.595	5.14356	775.424	805.091	414.417	509.038	826.172	433.225	514.616	849.979	362.905	426.295	848.895	394.156	320.723	821.284	368.64
16	0.15	631.199	1340.97	144.962	667.404	1330.18	75.8764	678.482	1343.35	206.617	746.143	1152.81	-6.3322	779.237	1172.74	310.082	686.877	1128.71	163.578	739.864	791.889	-89.5446	470.866	847.225	-36.7977	492.356	849.47	36.6307	400.169	845.421	13.0206	304.109	821.598	5.15712	775.413	805.145	414.424	509.027	826.177	433.227	514.602	849.979	362.914	426.253	848.903	394.179	320.72	821.287	368.668
17	0.16	631.147	1340.99	144.959	667.388	1330.17	75.8632	678.471	1343.36	206.613	746.116	1152.74	-6.38575	779.237	1172.77	310.053	686.815	1128.73	163.578	739.866	791.806	-89.5136	470.878	847.147	-36.7825	492.334	849.417	36.64	400.244	845.331	12.9843	304.091	821.602	5.17058	775.36	805.187	414.431	509.011	826.19	433.24	514.608	849.986	362.929	426.215	848.913	394.198	320.692	821.311	368.69
18	0.17	631.211	1340.98	144.917	667.396	1330.16	75.8345	678.52	1343.37	206.583	746.131	1152.66	-6.46563	779.247	1172.79	310.009	686.819	1128.72	163.554	739.91	791.724	-89.4975	470.927	847.064	-36.8005	492.388	849.389	36.6385	400.223	845.448	13.0544	304.104	821.63	5.17113	775.354	805.232	414.454	508.988	826.192	433.256	514.541	849.999	362.925	426.217	848.922	394.187	320.68	821.34	368.687
19	0.18	631.238	1340.98	144.857	667.404	1330.18	75.7874	678.569	1343.36	206.549	746.146	1152.6	-6.54903	779.259	1172.79	309.971	686.873	1128.71	163.522	739.948	791.652	-89.4775	471.006	846.983	-36.8247	492.465	849.354	36.6278	400.214	845.492	13.0696	304.141	821.644	5.16808	775.381	805.28	414.459	508.977	826.194	433.241	514.494	850.006	362.905	426.226	848.937	394.181	320.686	821.359	368.68
20	0.19	631.134	1341.05	144.841	667.384	1330.22	75.7435	678.594	1343.38	206.526	746.166	1152.53	-6.60577	779.276	1172.8	309.935	686.874	1128.72	163.465	740.031	791.577	-89.4357	471.046	846.935	-36.8259	492.474	849.312	36.6157	400.298	845.476	13.0353	304.179	821.673	5.16883	775.416	805.312	414.469	509	826.198	433.244	514.619	849.97	362.832	426.226	848.962	394.209	320.673	821.371	368.7
21	0.2	631.147	1341.1	144.785	667.326	1330.25	75.6864	678.6	1343.39	206.492	746.145	1152.47	-6.6831	779.319	1172.83	309.915	686.9	1128.71	163.423	740.067	791.477	-89.3947	471.061	846.906	-36.8388	492.541	849.272	36.5778	400.381	845.401	12.9865	304.174	821.713	5.15385	775.411	805.31	414.472	509.054	826.208	433.242	514.812	849.911	362.759	426.247	848.979	394.223	320.666	821.396	368.695
22	0.21	631.186	1341.11	144.722	667.347	1330.26	75.5953	678.626	1343.38	206.421	746.172	1152.39	-6.77408	779.354	1172.82	309.846	686.844	1128.75	163.385	740.124	791.356	-89.3684	471.132	846.851	-36.889	492.604	849.257	36.5522	400.511	845.266	12.8528	304.183	821.733	5.12096	775.436	805.307	414.46	509.13	826.235	433.227	514.665	850.03	362.853	426.252	848.993	394.202	320.705	821.405	368.682
23	0.22	631.268	1341.08	144.628	667.359	1330.24	75.5083	678.627	1343.36	206.354	746.187	1152.3	-6.87684	779.358	1172.8	309.803	686.796	1128.77	163.333	740.188	791.252	-89.3378	471.185	846.771	-36.9257	492.645	849.225	36.5241	400.53	845.213	12.8272	304.219	821.737	5.10117	775.458	805.316	414.45	509.132	826.256	433.196	514.644	850.05	362.844	426.27	848.982	394.172	320.699	821.395	368.673
24	0.23	631.264	1341.05	144.556	667.31	1330.22	75.4504	678.63	1343.37	206.288	746.158	1152.19	-6.96592	779.356	1172.79	309.764	686.71	1128.76	163.289	740.185	791.132	-89.3051	471.219	846.686	-36.9349	492.642	849.181	36.5115	400.529	845.189	12.8369	304.224	821.725	5.09547	775.455	805.321	414.44	509.076	826.231	433.188	514.604	850.039	362.831	426.275	848.974	394.16	320.682	821.372	368.663
25	0.24	631.267	1341.02	144.525	667.283	1330.19	75.3768	678.648	1343.37	206.259	746.127	1152.08	-7.0567	779.337	1172.79	309.733	686.755	1128.72	163.27	740.133	791.001	-89.2623	471.28	846.604	-36.9357	492.603	849.153	36.5656	400.539	845.177	12.8293	304.223	821.71	5.10185	775.418	805.311	414.419	509.07	826.246	433.197	514.599	850.026	362.832	426.255	848.95	394.146	320.685	821.352	368.644
26	0.25	631.455	1340.94	144.46	667.294	1330.18	75.3264	678.646	1343.33	206.211	746.123	1151.95	-7.13417	779.333	1172.76	309.68	686.85	1128.66	163.232	740.099	790.87	-89.2358	471.321	846.518	-36.9163	492.627	849.075	36.6083	400.588	845.151	12.8541	304.241	821.68	5.1204	775.416	805.341	414.411	509.071	826.241	433.202	514.581	849.999	362.832	426.271	848.912	394.14	320.712	821.326	368.647
27	0.26	631.56	1340.88	144.393	667.334	1330.14	75.2583	678.662	1343.31	206.16	746.134	1151.83	-7.19521	779.335	1172.75	309.65	686.986	1128.61	163.174	740.123	790.768	-89.2167	471.374	846.433	-36.895	492.656	849.004	36.6369	400.603	845.113	12.8884	304.273	821.657	5.13937	775.421	805.363	414.401	509.062	826.225	433.213	514.582	849.994	362.844	426.261	848.879	394.142	320.705	821.313	368.65
28	0.27	631.504	1340.87	144.377	667.313	1330.1	75.2106	678.638	1343.28	206.112	746.136	1151.72	-7.27114	779.337	1172.75	309.603	686.949	1128.57	163.146	740.105	790.649	-89.1864	471.406	846.338	-36.9042	492.708	848.945	36.6393	400.625	845.143	12.9337	304.279	821.644	5.13462	775.399	805.38	414.395	509.029	826.22	433.219	514.642	849.929	362.764	426.237	848.869	394.149	320.692	821.295	368.646
29	0.28	631.526	1340.86	144.339	667.266	1330.08	75.1428	678.643	1343.28	206.064	746.098	1151.62	-7.34976	779.368	1172.75	309.532	687.058	1128.51	163.05	740.115	790.538	-89.1235	471.438	846.253	-36.9105	492.757	848.881	36.6047	400.604	845.203	12.9396	304.284	821.634	5.11925	775.377	805.383	414.393	509.045	826.22	433.227	514.763	849.85	362.663	426.242	848.877	394.148	320.714	821.278	368.632
30	0.29	631.483	1340.88	144.277	667.211	1330.09	75.0724	678.691	1343.27	206.01	746.117	1151.55	-7.43062	779.435	1172.76	309.467	687.266	1128.44	162.937	740.195	790.451	-89.0655	471.46	846.192	-36.891	492.817	848.829	36.5667	400.683	845.096	12.8643	304.317	821.633	5.09624	775.402	805.397	414.381	509.076	826.226	433.212	514.592	849.951	362.761	426.265	848.905	394.15	320.717	821.311	368.637
31	0.3	631.294	1340.94	144.243	667.183	1330.11	75.0041	678.743	1343.26	205.951	746.119	1151.47	-7.5033	779.505	1172.77	309.399	687.278	1128.43	162.841	740.278	790.339	-88.9899	471.464	846.146	-36.8695	492.895	848.787	36.5435	400.744	845.061	12.8422	304.332	821.652	5.07983	775.418	805.403	414.39	509.101	826.226	433.205	514.656	849.918	362.71	426.281	848.933	394.151	320.712	821.362	368.64
32	0.31	631.234	1340.96	144.213	667.127	1330.13	74.9529	678.767	1343.26	205.906	746.113	1151.38	-7.57895	779.492	1172.78	309.35	687.098	1128.52	162.806	740.36	790.225	-88.9126	471.477	846.097	-36.8654	492.927	848.734	36.5529	400.772	845.062	12.8324	304.337	821.671	5.07925	775.435	805.425	414.416	509.125	826.238	433.21	514.804	849.848	362.645	426.297	848.951	394.152	320.74	821.39	368.643
33	0.32	631.274	1340.95	144.178	667.047	1330.14	74.9208	678.778	1343.27	205.888	746.132	1151.28	-7.65388	779.503	1172.78	309.293	687.158	1128.53	162.734	740.451	790.099	-88.8671	471.499	846.032	-36.8643	492.964	848.667	36.5341	400.755	845.077	12.839	304.352	821.69	5.07565	775.411	805.433	414.425	509.142	826.256	433.216	514.769	849.884	362.692	426.308	848.955	394.153	320.754	821.405	368.634
34	0.33	631.251	1340.94	144.134	666.98	1330.13	74.8621	678.754	1343.25	205.835	746.122	1151.18	-7.73197	779.529	1172.79	309.245	687.295	1128.47	162.618	740.527	789.953	-88.8127	471.539	845.919	-36.8835	493.04	848.601	36.523	400.809	845.09	12.8182	304.337	821.707	5.06457	775.407	805.46	414.437	509.169	826.274	433.227	514.868	849.844	362.645	426.312	848.941	394.146	320.739	821.395	368.603
35	0.34	631.136	1340.92	144.112	666.955	1330.1	74.8092	678.759	1343.23	205.768	746.11	1151.08	-7.80484	779.513	1172.81	309.163	687.395	1128.39	162.475	740.608	789.805	-88.7292	471.604	845.788	-36.9091	493.117	848.528	36.518	400.829	845.088	12.7935	304.336	821.721	5.05715	775.447	805.511	414.457	509.156	826.284	433.21	514.711	849.959	362.782	426.305	848.934	394.119	320.745	821.364	368.558
36	0.35	630.989	1340.88	144.108	666.897	1330.06	74.7875	678.732	1343.2	205.725	746.076	1150.97	-7.88195	779.519	1172.83	309.119	687.329	1128.4	162.435	740.657	789.667	-88.6689	471.621	845.643	-36.8936	493.151	848.452	36.5181	400.821	845.077	12.8198	304.337	821.741	5.05306	775.468	805.564	414.491	509.159	826.299	433.222	514.712	849.937	362.73	426.301	848.936	394.111	320.739	821.357	368.544
37	0.36	630.97	1340.81	144.097	666.817	1330.02	74.7393	678.667	1343.16	205.685	746.037	1150.84	-7.96575	779.51	1172.84	309.089	687.264	1128.39	162.394	740.688	789.479	-88.6649	471.64	845.511	-36.8694	493.152	848.394	36.5341	400.898	845.037	12.8028	304.314	821.749	5.06325	775.461	805.613	414.516	509.166	826.319	433.238	514.786	849.864	362.651	426.257	848.936	394.125	320.71	821.353	368.534
38	0.37	631.022	1340.71	144.057	666.763	1329.99	74.6914	678.661	1343.11	205.651	746.013	1150.7	-8.05626	779.447	1172.84	309.071	687.615	1128.21	162.192	740.752	789.317	-88.6235	471.665	845.378	-36.871	493.18	848.288	36.5262	400.973	845	12.7851	304.325	821.726	5.05279	775.446	805.646	414.526	509.126	826.31	433.221	514.637	849.953	362.782	426.229	848.909	394.123	320.676	821.344	368.534
39	0.38	630.995	1340.63	144.008	666.751	1329.95	74.644	678.632	1343.07	205.622	745.999	1150.58	-8.15453	779.427	1172.83	309.025	687.699	1128.12	162.099	740.825	789.173	-88.5436	471.738	845.231	-36.8812	493.246	848.174	36.5212	401.049	844.957	12.7673	304.348	821.701	5.04295	775.448	805.673	414.54	509.082	826.284	433.213	514.611	849.962	362.821	426.247	848.879	394.116	320.646	821.332	368.535
40	0.39	630.875	1340.58	144.009	666.687	1329.94	74.616	678.59	1343.06	205.607	745.985	1150.45	-8.23708	779.397	1172.83	308.995	687.555	1128.1	162.045	740.91	789.024	-88.4678	471.809	845.087	-36.8706	493.296	848.074	36.5375	401.079	844.909	12.767	304.336	821.702	5.06471	775.468	805.688	414.551	509.046	826.239	433.217	514.555	849.915	362.826	426.255	848.867	394.113	320.639	821.321	368.547
41	0.4	630.765	1340.58	144.022	666.628	1329.93	74.6193	678.569	1343.05	205.598	745.951	1150.32	-8.29672	779.396	1172.82	308.973	687.61	1128.06	161.937	741.037	788.886	-88.3641	471.857	844.985	-36.8341	493.372	847.984	36.5536	401.11	844.896	12.8056	304.371	821.719	5.07642	775.476	805.667	414.56	509.043	826.219	433.21	514.556	849.897	362.821	426.25	848.888	394.136	320.675	821.35	368.593
42	0.41	630.695	1340.61	144.018	666.564	1329.93	74.6162	678.556	1343.05	205.599	745.909	1150.21	-8.37577	779.36	1172.8	308.932	687.767	1127.98	161.816	741.148	788.724	-88.2676	471.878	844.901	-36.7846	493.468	847.889	36.5684	401.162	844.914	12.8811	304.41	821.741	5.07994	775.463	805.635	414.568	509.057	826.222	433.21	514.551	849.869	362.801	426.255	848.913	394.154	320.709	821.384	368.619
43	0.42	630.661	1340.59	144.015	666.502	1329.94	74.5889	678.508	1343.03	205.576	745.877	1150.11	-8.48044	779.331	1172.75	308.916	687.647	1127.98	161.729	741.227	788.521	-88.1833	471.906	844.822	-36.7583	493.532	847.786	36.5761	401.192	844.912	12.8967	304.461	821.749	5.05368	775.466	805.607	414.566	509.063	826.242	433.196	514.547	849.855	362.774	426.257	848.943	394.147	320.695	821.412	368.603
44	0.43	630.572	1340.61	144.009	666.438	1329.95	74.5845	678.496	1343.02	205.531	745.862	1150	-8.57791	779.316	1172.76	308.89	687.451	1128.06	161.677	741.263	788.282	-88.1234	471.961	844.726	-36.747	493.638	847.733	36.5726	401.25	844.908	12.8884	304.494	821.761	5.03094	775.484	805.607	414.57	509.12	826.268	433.188	514.593	849.874	362.781	426.287	848.969	394.136	320.695	821.416	368.592
45	0.44	630.318	1340.63	144.032	666.391	1329.94	74.5742	678.457	1343	205.511	745.848	1149.89	-8.68568	779.3	1172.79	308.837	687.502	1128.03	161.551	741.194	788.001	-88.0775	471.989	844.631	-36.7454	493.728	847.694	36.5481	401.259	844.895	12.8866	304.513	821.767	5.01298	775.471	805.608	414.571	509.152	826.277	433.212	514.597	849.883	362.776	426.31	848.974	394.123	320.694	821.413	368.588
46	0.45	630.177	1340.57	144.036	666.337	1329.91	74.5478	678.398	1342.96	205.498	745.806	1149.78	-8.79451	779.273	1172.8	308.81	687.673	1127.95	161.411	741.105	787.695	-88.0306	472.039	844.518	-36.7559	493.771	847.646	36.5349	401.28	844.882	12.876	304.53	821.768	4.99707	775.438	805.598	414.57	509.142	826.277	433.205	514.582	849.9	362.771	426.301	848.958	394.1	320.702	821.389	368.562
47	0.46	630.164	1340.48	143.984	666.291	1329.88	74.5111	678.352	1342.92	205.461	745.738	1149.66	-8.91119	779.152	1172.78	308.759	687.638	1127.89	161.321	740.984	787.373	-88.0086	472.115	844.389	-36.7778	493.83	847.577	36.5093	401.326	844.85	12.8263	304.534	821.751	4.97699	775.412	805.629	414.6	509.103	826.301	433.178	514.582	849.926	362.766	426.306	848.929	394.057	320.709	821.363	368.518
48	0.47	630.18	1340.42	143.98	666.243	1329.87	74.4997	678.262	1342.85	205.436	745.67	1149.54	-9.01137	779.109	1172.78	308.701	687.722	1127.81	161.227	740.946	787.149	-87.9587	472.15	844.264	-36.766	493.862	847.519	36.5211	401.403	844.795	12.7793	304.533	821.728	4.96747	775.394	805.663	414.615	509.099	826.312	433.179	514.591	849.94	362.773	426.298	848.904	394.039	320.693	821.33	368.487
49	0.48	630.133	1340.37	144.008	666.195	1329.84	74.5168	678.195	1342.78	205.433	745.62	1149.42	-9.08351	779.095	1172.8	308.689	687.639	1127.8	161.244	740.953	787.005	-87.8785	472.145	844.155	-36.7208	493.811	847.49	36.5939	401.432	844.758	12.7698	304.537	821.712	4.98495	775.417	805.697	414.652	509.077	826.292	433.181	514.576	849.901	362.776	426.287	848.888	394.046	320.695	821.305	368.498
50	0.49	630.118	1340.32	144.038	666.109	1329.83	74.5619	678.184	1342.75	205.444	745.591	1149.32	-9.12997	779.095	1172.77	308.67	687.78	1127.7	161.169	741.005	786.889	-87.7854	472.148	844.064	-36.664	493.789	847.442	36.6387	401.422	844.753	12.8247	304.534	821.7	5.01693	775.451	805.728	414.691	509.069	826.26	433.193	514.561	849.874	362.798	426.291	848.863	394.068	320.71	821.3	368.526
51	0.5	630.087	1340.28	144.067	666.043	1329.82	74.5993	678.165	1342.72	205.475	745.573	1149.23	-9.16967	779.065	1172.74	308.652	687.912	1127.6	161.097	741.122	786.798	-87.7085	472.169	843.987	-36.6445	493.835	847.37	36.6512	401.419	844.745	12.8709	304.552	821.695	5.04282	775.482	805.757	414.706	509.076	826.239	433.222	514.579	849.864	362.8	426.273	848.854	394.088	320.704	821.309	368.548
52	0.51	630.033	1340.26	144.088	666.01	1329.82	74.6009	678.155	1342.73	205.486	745.555	1149.16	-9.20853	779.067	1172.73	308.626	687.975	1127.54	161.056	741.198	786.738	-87.6481	472.16	843.945	-36.6335	493.799	847.353	36.6822	401.419	844.763	12.8818	304.559	821.698	5.06385	775.491	805.77	414.71	509.068	826.231	433.244	514.539	849.827	362.797	426.288	848.862	394.114	320.737	821.329	368.563
53	0.52	629.982	1340.27	144.103	665.958	1329.82	74.6054	678.125	1342.74	205.481	745.551	1149.11	-9.22618	779.039	1172.74	308.597	687.929	1127.55	161.066	741.238	786.69	-87.5921	472.159	843.957	-36.6169	493.791	847.36	36.6948	401.421	844.794	12.9091	304.538	821.707	5.06515	775.506	805.782	414.701	509.037	826.228	433.225	514.571	849.831	362.801	426.294	848.895	394.129	320.738	821.362	368.586
54	0.53	629.945	1340.3	144.089	665.89	1329.85	74.606	678.09	1342.74	205.477	745.54	1149.08	-9.26115	778.995	1172.75	308.565	687.842	1127.59	160.988	741.286	786.655	-87.5735	472.171	844.004	-36.6148	493.803	847.376	36.6892	401.425	844.825	12.9101	304.548	821.744	5.05683	775.532	805.774	414.711	509.074	826.227	433.219	514.62	849.847	362.784	426.292	848.924	394.129	320.73	821.397	368.595
55	0.54	629.822	1340.33	144.074	665.818	1329.86	74.5917	678.022	1342.73	205.454	745.501	1149.05	-9.31497	778.903	1172.75	308.519	687.719	1127.62	160.947	741.296	786.608	-87.569	472.173	844.023	-36.6524	493.817	847.389	36.6574	401.394	844.853	12.9177	304.537	821.795	5.04876	775.545	805.781	414.702	509.069	826.233	433.194	514.683	849.808	362.7	426.291	848.944	394.115	320.695	821.426	368.577
56	0.55	629.73	1340.3	144.025	665.76	1329.85	74.5605	677.967	1342.73	205.42	745.494	1149.01	-9.35567	778.853	1172.73	308.489	687.527	1127.67	160.905	741.266	786.535	-87.6143	472.156	844.02	-36.6972	493.813	847.419	36.6224	401.38	844.846	12.8975	304.528	821.814	5.02441	775.506	805.759	414.678	509.053	826.249	433.152	514.805	849.766	362.587	426.28	848.941	394.093	320.691	821.415	368.561
57	0.56	629.67	1340.26	144.006	665.729	1329.82	74.531	677.908	1342.69	205.379	745.485	1148.95	-9.3937	778.801	1172.72	308.461	687.523	1127.64	160.85	741.171	786.458	-87.7101	472.143	844.022	-36.731	493.79	847.453	36.5901	401.468	844.814	12.8208	304.555	821.806	4.99443	775.494	805.726	414.663	509.11	826.294	433.149	514.639	849.84	362.67	426.268	848.927	394.064	320.68	821.383	368.528
58	0.57	629.724	1340.19	143.984	665.707	1329.77	74.5021	677.831	1342.61	205.326	745.436	1148.89	-9.43865	778.749	1172.73	308.457	687.66	1127.55	160.796	741.105	786.422	-87.8364	472.169	843.984	-36.7701	493.836	847.445	36.5399	401.484	844.798	12.7764	304.584	821.799	4.96805	775.491	805.719	414.659	509.114	826.3	433.147	514.598	849.884	362.685	426.267	848.897	394.034	320.654	821.325	368.488
59	0.58	629.719	1340.13	143.945	665.708	1329.74	74.4743	677.749	1342.55	205.285	745.395	1148.82	-9.45897	778.75	1172.76	308.454	687.645	1127.54	160.82	741.108	786.385	-87.9509	472.196	843.946	-36.8054	493.916	847.399	36.5061	401.526	844.767	12.7608	304.599	821.773	4.97984	775.469	805.712	414.65	509.106	826.294	433.154	514.572	849.901	362.704	426.273	848.86	394.023	320.668	821.287	368.477
60	0.59	629.643	1340.12	143.949	665.651	1329.74	74.4825	677.684	1342.52	205.265	745.365	1148.77	-9.45992	778.644	1172.76	308.445	687.579	1127.53	160.878	741.038	786.33	-88.0626	472.196	843.921	-36.8223	493.941	847.361	36.4981	401.557	844.755	12.757	304.597	821.763	4.99976	775.439	805.722	414.646	509.08	826.297	433.173	514.568	849.89	362.735	426.257	848.848	394.038	320.657	821.303	368.508
61	0.6	629.612	1340.12	143.973	665.548	1329.75	74.5091	677.679	1342.56	205.304	745.317	1148.74	-9.44825	778.582	1172.76	308.431	687.559	1127.47	160.869	740.992	786.302	-88.1632	472.174	843.891	-36.8111	493.941	847.336	36.4843	401.512	844.78	12.7857	304.618	821.744	5.02305	775.424	805.749	414.654	509.062	826.272	433.185	514.531	849.865	362.74	426.25	848.856	394.065	320.676	821.317	368.536
62	0.61	629.589	1340.15	143.972	665.48	1329.76	74.5091	677.679	1342.61	205.319	745.248	1148.72	-9.44442	778.575	1172.75	308.376	687.649	1127.4	160.825	740.994	786.303	-88.2188	472.19	843.859	-36.8077	493.939	847.306	36.4594	401.458	844.782	12.8227	304.614	821.736	5.04198	775.441	805.784	414.666	509.08	826.269	433.185	514.541	849.851	362.74	426.263	848.883	394.079	320.698	821.355	368.557
63	0.62	629.534	1340.19	143.987	665.466	1329.75	74.5	677.64	1342.64	205.322	745.171	1148.7	-9.43783	778.505	1172.73	308.328	687.586	1127.34	160.844	741.032	786.286	-88.2628	472.192	843.837	-36.7973	493.95	847.252	36.4489	401.458	844.78	12.8227	304.606	821.737	5.04466	775.438	805.823	414.686	509.101	826.268	433.194	514.586	849.863	362.762	426.285	848.919	394.101	320.735	821.402	368.579
64	0.63	629.444	1340.23	143.986	665.403	1329.76	74.5118	677.587	1342.68	205.334	745.103	1148.66	-9.41912	778.454	1172.75	308.29	687.285	1127.41	160.934	741.053	786.262	-88.2934	472.19	843.801	-36.8023	493.924	847.23	36.4523	401.459	844.794	12.811	304.62	821.738	5.05462	775.437	805.869	414.713	509.119	826.271	433.233	514.703	849.829	362.741	426.284	848.933	394.13	320.756	821.412	368.62
65	0.64	629.401	1340.24	143.979	665.335	1329.78	74.5168	677.532	1342.68	205.307	745.031	1148.63	-9.41991	778.455	1172.79	308.269	687.102	1127.46	160.959	741.072	786.243	-88.3266	472.222	843.757	-36.8162	493.904	847.219	36.4596	401.491	844.784	12.8026	304.639	821.75	5.05414	775.398	805.911	414.756	509.12	826.274	433.25	514.869	849.764	362.682	426.293	848.925	394.142	320.728	821.403	368.624
66	0.65	629.404	1340.21	143.923	665.319	1329.76	74.4658	677.502	1342.63	205.241	744.978	1148.6	-9.45595	778.409	1172.81	308.192	687.034	1127.45	160.92	741.068	786.21	-88.3851	472.274	843.727	-36.8734	493.972	847.214	36.4171	401.541	844.772	12.7642	304.656	821.747	5.01908	775.388	805.947	414.777	509.12	826.295	433.236	514.679	849.842	362.767	426.321	848.893	394.111	320.733	821.362	368.57
67	0.66	629.395	1340.18	143.871	665.313	1329.74	74.3968	677.42	1342.56	205.172	744.904	1148.56	-9.48806	778.374	1172.85	308.103	687.087	1127.41	160.892	741.037	786.157	-88.4174	472.325	843.701	-36.9286	494.025	847.23	36.3697	401.607	844.752	12.7188	304.68	821.752	4.97348	775.442	806	414.803	509.104	826.306	433.212	514.617	849.9	362.772	426.332	848.869	394.067	320.734	821.321	368.527
68	0.67	629.309	1340.18	143.843	665.254	1329.74	74.3784	677.34	1342.54	205.131	744.836	1148.53	-9.49023	778.301	1172.87	308.087	687.07	1127.41	160.844	741.042	786.129	-88.4288	472.325	843.694	-36.9285	493.992	847.269	36.3755	401.627	844.753	12.6821	304.66	821.786	4.97445	775.482	806.045	414.833	509.105	826.332	433.203	514.601	849.938	362.764	426.322	848.885	394.055	320.709	821.315	368.491
69	0.68	629.179	1340.21	143.849	665.129	1329.75	74.4072	677.276	1342.55	205.104	744.764	1148.51	-9.48004	778.268	1172.87	308.08	686.884	1127.47	160.864	741.034	786.108	-88.4518	472.309	843.722	-36.9123	493.978	847.308	36.3961	401.564	844.785	12.7298	304.644	821.818	4.9915	775.477	806.052	414.834	509.126	826.364	433.215	514.566	849.961	362.76	426.316	848.913	394.065	320.697	821.339	368.491
70	0.69	629.142	1340.21	143.816	665.061	1329.74	74.3921	677.189	1342.56	205.068	744.699	1148.5	-9.49354	778.267	1172.88	308.095	686.858	1127.45	160.893	741.041	786.075	-88.4741	472.291	843.751	-36.9194	493.984	847.342	36.3913	401.52	844.818	12.7653	304.648	821.847	4.99364	775.492	806.059	414.827	509.135	826.377	433.211	514.512	849.951	362.736	426.311	848.935	394.063	320.69	821.361	368.492
71	0.7	629.07	1340.18	143.783	665.018	1329.7	74.3569	677.147	1342.55	205.048	744.638	1148.48	-9.50266	778.308	1172.88	308.098	686.91	1127.36	160.878	741.043	786.047	-88.4935	472.292	843.737	-36.9333	493.943	847.359	36.3888	401.533	844.84	12.7536	304.657	821.851	4.98183	775.533	806.051	414.803	509.153	826.375	433.191	514.563	849.923	362.725	426.308	848.933	394.058	320.684	821.38	368.474
72	0.71	628.988	1340.15	143.791	664.944	1329.65	74.3541	677.084	1342.54	205.043	744.583	1148.44	-9.49458	778.293	1172.86	308.093	686.765	1127.32	160.913	741.059	786.034	-88.4971	472.291	843.712	-36.924	493.965	847.319	36.3785	401.49	844.844	12.7436	304.616	821.834	4.99814	775.523	806.02	414.763	509.139	826.339	433.193	514.601	849.893	362.741	426.289	848.937	394.079	320.685	821.404	368.483
73	0.72	628.969	1340.11	143.79	664.867	1329.6	74.3719	677.086	1342.51	205.052	744.524	1148.39	-9.4836	778.231	1172.85	308.111	686.761	1127.24	161.01	741.084	786.008	-88.5179	472.279	843.687	-36.8997	493.947	847.289	36.418	401.49	844.834	12.7611	304.628	821.808	5.02822	775.505	805.977	414.725	509.144	826.317	433.206	514.636	849.88	362.779	426.304	848.929	394.093	320.704	821.404	368.526
74	0.73	629.035	1340.09	143.786	664.779	1329.54	74.3875	677.052	1342.47	205.06	744.473	1148.33	-9.49261	778.256	1172.81	308.076	686.772	1127.2	161.002	741.099	785.978	-88.5397	472.285	843.668	-36.8818	493.975	847.261	36.4341	401.538	844.81	12.7776	304.654	821.779	5.05612	775.508	805.953	414.688	509.171	826.309	433.217	514.735	849.815	362.727	426.312	848.911	394.104	320.735	821.395	368.563
75	0.74	629.094	1340.15	143.787	664.713	1329.48	74.3816	676.953	1342.41	205.037	744.435	1148.27	-9.51483	778.284	1172.8	308.028	686.952	1127.08	160.946	741.093	785.92	-88.5773	472.304	843.636	-36.8886	494.003	847.241	36.4183	401.56	844.796	12.7688	304.676	821.749	5.05126	775.484	805.954	414.653	509.169	826.305	433.211	514.836	849.75	362.639	426.293	848.904	394.107	320.741	821.386	368.566
76	0.75	628.987	1340.18	143.817	664.621	1329.45	74.3713	676.868	1342.35	205.009	744.359	1148.2	-9.54718	778.236	1172.82	308.018	686.956	1127.07	160.956	741.06	785.838	-88.6091	472.325	843.606	-36.9005	494.047	847.241	36.3942	401.591	844.79	12.7609	304.697	821.745	5.04285	775.457	805.958	414.651	509.125	826.297	433.206	514.636	849.836	362.746	426.295	848.89	394.099	320.733	821.352	368.548
77	0.76	628.905	1340.11	143.791	664.595	1329.41	74.3234	676.796	1342.3	204.972	744.28	1148.14	-9.58892	778.181	1172.83	307.999	686.769	1127.15	160.948	741.059	785.773	-88.6289	472.344	843.618	-36.9234	494.052	847.245	36.3797	401.605	844.793	12.7661	304.668	821.766	5.02318	775.456	805.986	414.658	509.132	826.325	433.2	514.602	849.881	362.754	426.307	848.893	394.077	320.758	821.343	368.511
78	0.77	628.819	1339.94	143.732	664.569	1329.38	74.2819	676.698	1342.29	204.927	744.198	1148.1	-9.64963	778.16	1172.88	307.954	686.639	1127.21	160.904	741.055	785.719	-88.662	472.374	843.662	-36.9464	494.091	847.253	36.3383	401.637	844.802	12.7398	304.693	821.789	4.97646	775.426	805.995	414.637	509.178	826.375	433.185	514.632	849.95	362.751	426.329	848.928	394.047	320.741	821.371	368.487
79	0.78	628.63	1340.04	143.726	664.468	1329.38	74.2565	676.603	1342.31	204.893	744.136	1148.08	-9.69181	778.137	1172.91	307.899	686.515	1127.28	160.893	741.055	785.677	-88.6886	472.357	843.68	-36.9477	494.166	847.26	36.282	401.639	844.836	12.7157	304.707	821.823	4.95007	775.418	806.014	414.631	509.203	826.401	433.175	514.734	849.939	362.663	426.317	848.963	394.04	320.725	821.393	368.474
80	0.79	628.47	1340.26	143.764	664.389	1329.4	74.2147	676.538	1342.31	204.862	744.092	1148.05	-9.7338	778.106	1172.92	307.855	686.405	1127.32	160.892	741.025	785.635	-88.7125	472.373	843.675	-36.9703	494.219	847.264	36.2554	401.599	844.86	12.7127	304.703	821.835	4.94494	775.363	806.011	414.653	509.181	826.412	433.17	514.842	849.894	362.571	426.307	848.984	394.035	320.705	821.414	368.466
81	0.8	628.4	1340.2	143.737	664.337	1329.38	74.1677	676.542	1342.31	204.836	744.02	1148.01	-9.7534	778.061	1172.94	307.847	686.242	1127.33	160.869	741.047	785.621	-88.7443	472.359	843.681	-36.9675	494.215	847.25	36.2622	401.615	844.856	12.7077	304.708	821.835	4.95195	775.366	806.038	414.689	509.181	826.414	433.188	514.629	849.984	362.668	426.318	848.973	394.039	320.706	821.42	368.469
82	0.81	628.524	1340.01	143.679	664.218	1329.35	74.1714	676.502	1342.31	204.812	743.947	1147.96	-9.76523	778.063	1172.95	307.825	686.334	1127.24	160.868	741.058	785.593	-88.7999	472.316	843.672	-36.951	494.213	847.226	36.278	401.598	844.862	12.779	304.7	821.819	4.9722	775.421	806.082	414.711	509.175	826.398	433.193	514.541	849.973	362.694	426.325	848.946	394.052	320.721	821.411	368.493
83	0.82	628.527	1339.99	143.688	664.14	1329.3	74.1475	676.422	1342.26	204.772	743.869	1147.88	-9.77826	777.98	1172.95	307.817	686.481	1127.12	160.827	741.05	785.564	-88.8394	472.266	843.653	-36.9143	494.177	847.221	36.3341	401.548	844.846	12.8282	304.683	821.797	4.99808	775.472	806.118	414.733	509.147	826.361	433.188	514.516	849.932	362.717	426.308	848.916	394.059	320.738	821.37	368.505
84	0.83	628.54	1339.76	143.629	664.116	1329.25	74.1111	676.397	1342.19	204.708	743.797	1147.81	-9.80431	777.896	1172.93	307.816	686.39	1127.08	160.844	741.064	785.543	-88.8846	472.275	843.646	-36.9	494.122	847.206	36.3668	401.6	844.828	12.8196	304.688	821.775	5.01565	775.488	806.148	414.742	509.174	826.34	433.201	514.521	849.921	362.725	426.318	848.873	394.053	320.743	821.328	368.507
85	0.84	628.541	1339.66	143.577	664.114	1329.19	74.0298	676.347	1342.15	204.625	743.743	1147.73	-9.83482	777.832	1172.93	307.812	686.154	1127.1	160.861	741.053	785.506	-88.9255	472.262	843.654	-36.9144	494.06	847.219	36.37	401.593	844.838	12.8365	304.707	821.751	5.01471	775.492	806.165	414.759	509.122	826.314	433.214	514.54	849.892	362.742	426.325	848.841	394.054	320.748	821.298	368.495
86	0.85	628.468	1339.69	143.523	664.042	1329.16	73.9366	676.27	1342.14	204.545	743.706	1147.69	-9.88363	777.743	1172.96	307.802	686.275	1127	160.765	741.039	785.493	-88.9827	472.227	843.72	-36.932	494.057	847.259	36.3676	401.573	844.851	12.8243	304.712	821.748	5.03192	775.53	806.203	414.776	509.101	826.315	433.208	514.568	849.901	362.744	426.337	848.847	394.044	320.739	821.291	368.496
87	0.86	628.331	1339.84	143.46	663.939	1329.17	73.8805	676.192	1342.18	204.479	743.673	1147.7	-9.91358	777.685	1172.97	307.793	686.356	1126.96	160.704	741.036	785.524	-89.0356	472.174	843.838	-36.9192	494.045	847.294	36.3504	401.574	844.881	12.8436	304.684	821.782	5.05315	775.531	806.254	414.782	509.109	826.338	433.183	514.565	849.905	362.733	426.312	848.888	394.042	320.719	821.334	368.501
88	0.87	628.101	1340	143.439	663.827	1329.22	73.8339	676.094	1342.26	204.462	743.623	1147.69	-9.91012	777.574	1172.98	307.781	686.264	1127.02	160.67	741.019	785.529	-89.0683	472.107	843.983	-36.8897	494.005	847.359	36.3429	401.529	844.951	12.8864	304.643	821.811	5.07729	775.517	806.281	414.799	509.073	826.349	433.17	514.634	849.874	362.664	426.287	848.949	394.053	320.683	821.42	368.527
89	0.88	628.036	1339.96	143.35	663.725	1329.24	73.7554	675.99	1342.3	204.415	743.56	1147.67	-9.91841	777.514	1173.01	307.728	686.078	1127.09	160.637	740.951	785.501	-89.1043	472.06	844.103	-36.8802	493.998	847.401	36.3401	401.508	844.993	12.8886	304.638	821.841	5.07619	775.484	806.284	414.82	509.102	826.363	433.177	514.873	849.781	362.514	426.261	848.985	394.067	320.673	821.475	368.556
90	0.89	628.028	1339.96	143.254	663.681	1329.21	73.6609	675.902	1342.27	204.299	743.549	1147.63	-9.9541	777.466	1173	307.647	686.061	1127.09	160.626	740.9	785.481	-89.1761	472.029	844.179	-36.8926	494.023	847.418	36.3059	401.517	845.007	12.8925	304.647	821.841	5.07263	775.502	806.299	414.819	509.158	826.359	433.163	514.873	849.807	362.541	426.288	848.97	394.052	320.667	821.479	368.538
91	0.9	627.967	1339.79	143.129	663.702	1329.13	73.539	675.789	1342.19	204.157	743.518	1147.57	-10.0116	777.431	1173.02	307.592	686.062	1127.07	160.61	740.86	785.46	-89.2886	472.043	844.198	-36.939	494.033	847.437	36.2801	401.511	845	12.8933	304.691	821.817	5.07012	775.509	806.319	414.828	509.169	826.372	433.155	514.644	849.938	362.683	426.328	848.938	394.025	320.676	821.427	368.505
92	0.91	627.865	1339.71	143.043	663.676	1329.02	73.415	675.671	1342.14	204.034	743.453	1147.49	-10.0568	777.333	1173.01	307.606	685.969	1127.1	160.621	740.778	785.421	-89.3956	472.061	844.192	-36.981	493.993	847.458	36.2825	401.484	845.011	12.9071	304.694	821.802	5.06024	775.446	806.325	414.84	509.16	826.387	433.175	514.589	849.983	362.725	426.319	848.909	394	320.685	821.368	368.476
93	0.92	627.896	1339.61	142.936	663.629	1328.93	73.2976	675.6	1342.12	203.94	743.382	1147.43	-10.0788	777.323	1173.04	307.606	685.976	1127.08	160.623	740.706	785.385	-89.4991	472.039	844.189	-36.9866	493.996	847.445	36.2831	401.474	844.995	12.9183	304.728	821.76	5.04098	775.4	806.329	414.851	509.145	826.39	433.197	514.568	849.989	362.747	426.313	848.884	393.988	320.666	821.331	368.454
94	0.93	627.889	1339.54	142.803	663.588	1328.86	73.2022	675.44	1342.11	203.82	743.338	1147.4	-10.1077	777.287	1173.03	307.543	685.994	1127.04	160.582	740.65	785.369	-89.6037	472.019	844.172	-36.9826	494.056	847.407	36.2368	401.492	844.965	12.9139	304.741	821.746	5.03137	775.425	806.374	414.862	509.158	826.41	433.2	514.569	849.989	362.752	426.309	848.88	393.985	320.65	821.34	368.452
95	0.94	627.799	1339.48	142.686	663.537	1328.8	73.1158	675.295	1342.12	203.698	743.281	1147.37	-10.1433	777.208	1173.04	307.561	685.932	1127.01	160.543	740.648	785.384	-89.6774	472.03	844.144	-37.0015	494.098	847.373	36.213	401.543	844.951	12.8933	304.736	821.73	5.02682	775.437	806.404	414.873	509.128	826.41	433.174	514.517	849.991	362.728	426.28	848.892	393.984	320.653	821.336	368.454
96	0.95	627.674	1339.44	142.591	663.434	1328.77	73.0591	675.236	1342.13	203.629	743.237	1147.36	-10.1436	777.129	1173.02	307.563	685.92	1126.95	160.535	740.637	785.368	-89.693	472.006	844.165	-36.9724	494.081	847.338	36.2125	401.524	844.957	12.9102	304.715	821.731	5.06915	775.43	806.42	414.879	509.083	826.383	433.177	514.479	849.987	362.725	426.26	848.917	394.011	320.65	821.362	368.479
97	0.96	627.514	1339.45	142.571	663.326	1328.76	73.0562	675.162	1342.12	203.588	743.22	1147.36	-10.1162	777.117	1173	307.537	685.975	1126.88	160.566	740.619	785.367	-89.6932	471.959	844.185	-36.9162	494.031	847.338	36.2576	401.494	844.957	12.9527	304.709	821.721	5.12315	775.418	806.413	414.882	509.081	826.379	433.21	514.601	849.92	362.688	426.27	848.94	394.07	320.673	821.426	368.541
98	0.97	627.408	1339.44	142.546	663.266	1328.75	73.0427	675.127	1342.12	203.539	743.236	1147.35	-10.1215	777.14	1172.99	307.452	685.934	1126.86	160.565	740.655	785.365	-89.7187	471.942	844.206	-36.8849	494.019	847.332	36.2728	401.524	844.951	12.9657	304.715	821.724	5.15194	775.422	806.402	414.87	509.103	826.366	433.213	514.766	849.831	362.61	426.29	848.943	394.103	320.728	821.441	368.588
99	0.98	627.41	1339.4	142.424	663.229	1328.71	72.9742	675.061	1342.11	203.433	743.214	1147.3	-10.1707	777.115	1173	307.413	685.847	1126.86	160.554	740.661	785.323	-89.7227	471.944	844.201	-36.8841	494.005	847.334	36.2729	401.592	844.935	12.9539	304.725	821.732	5.13249	775.451	806.429	414.862	509.104	826.35	433.183	514.598	849.895	362.709	426.291	848.92	394.08	320.728	821.441	368.589
100	0.99	627.395	1339.34	142.268	663.179	1328.66	72.8835	674.957	1342.1	203.33	743.159	1147.22	-10.238	777.034	1173.01	307.384	685.899	1126.82	160.486	740.657	785.265	-89.733	471.939	844.193	-36.9229	494.008	847.34	36.2577	401.569	844.954	12.9393	304.706	821.733	5.11036	775.474	806.464	414.862	509.088	826.355	433.163	514.503	849.898	362.703	426.277	848.893	394.036	320.706	821.391	368.546
101	1	627.321	1339.31	142.157	663.138	1328.62	72.7992	674.917	1342.1	203.249	743.119	1147.16	-10.2918	777.042	1173.02	307.343	685.881	1126.85	160.488	740.68	785.197	-89.745	471.923	844.186	-36.9548	493.975	847.378	36.2677	401.491	845.004	12.9453	304.679	821.766	5.11035	775.486	806.483	414.85	509.134	826.417	433.171	514.516	849.924	362.7	426.276	848.878	394.01	320.698	821.34	368.491
102	1.01	627.306	1339.28	142.032	663.106	1328.62	72.729	674.869	1342.11	203.159	743.094	1147.11	-10.3354	777.095	1173.08	307.277	685.829	1126.95	160.498	740.637	785.116	-89.754	471.932	844.193	-36.959	493.989	847.422	36.264	401.469	845.033	12.9305	304.683	821.8	5.10286	775.516	806.515	414.849	509.164	826.446	433.161	514.571	849.978	362.689	426.294	848.884	393.988	320.693	821.328	368.462
103	1.02	627.216	1339.27	141.875	663.084	1328.63	72.6432	674.8	1342.12	203.069	743.04	1147.07	-10.3954	777.063	1173.1	307.249	685.832	1126.97	160.435	740.618	785.049	-89.7603	471.92	844.195	-36.9648	494.017	847.439	36.232	401.445	845.04	12.9391	304.677	821.807	5.06786	775.494	806.529	414.826	509.188	826.452	433.12	514.556	850.002	362.642	426.296	848.887	393.954	320.668	821.318	368.443
104	1.03	627.183	1339.25	141.735	663.097	1328.61	72.5546	674.743	1342.12	202.999	743.009	1147.02	-10.4465	777.063	1173.1	307.229	685.751	1126.98	160.376	740.593	784.962	-89.7771	471.928	844.173	-36.9826	494.054	847.426	36.2044	401.433	845.056	12.9217	304.677	821.814	5.023	775.481	806.539	414.833	509.192	826.455	433.112	514.511	849.98	362.618	426.279	848.876	393.933	320.653	821.314	368.421
105	1.04	627.155	1339.25	141.702	663.1	1328.59	72.5042	674.73	1342.11	202.939	743.031	1146.97	-10.4593	777.083	1173.12	307.204	685.703	1126.92	160.392	740.598	784.911	-89.7627	471.961	844.141	-36.9712	494.072	847.391	36.2224	401.498	845.055	12.9033	304.689	821.798	5.03911	775.494	806.559	414.867	509.169	826.437	433.122	514.52	849.976	362.645	426.3	848.871	393.943	320.689	821.327	368.455
106	1.05	627.08	1339.29	141.732	663.039	1328.59	72.4943	674.769	1342.12	202.913	743.085	1146.94	-10.4571	777.054	1173.14	307.22	685.71	1126.88	160.417	740.653	784.91	-89.702	471.991	844.12	-36.9322	494.034	847.358	36.2731	401.553	845.036	12.943	304.681	821.799	5.10643	775.479	806.57	414.859	509.153	826.407	433.137	514.487	849.96	362.687	426.324	848.883	393.987	320.713	821.362	368.518
107	1.06	626.975	1339.33	141.731	662.967	1328.6	72.4805	674.744	1342.13	202.889	743.108	1146.91	-10.4656	777.006	1173.13	307.146	685.753	1126.82	160.403	740.744	784.93	-89.6447	471.969	844.087	-36.8788	494.014	847.323	36.2964	401.538	845.019	12.9642	304.673	821.791	5.14127	775.471	806.603	414.858	509.132	826.389	433.163	514.505	849.963	362.723	426.31	848.915	394.046	320.708	821.405	368.579
108	1.07	626.955	1339.32	141.669	662.978	1328.57	72.4317	674.719	1342.14	202.833	743.108	1146.85	-10.4885	776.951	1173.12	307.123	685.796	1126.78	160.345	740.781	784.886	-89.6118	471.968	844.034	-36.8536	494.018	847.284	36.2993	401.536	845.01	12.9728	304.69	821.774	5.14769	775.477	806.62	414.875	509.113	826.402	433.188	514.5	849.959	362.734	426.282	848.931	394.064	320.702	821.435	368.596
109	1.08	627.009	1339.29	141.596	663.02	1328.53	72.3522	674.74	1342.15	202.77	743.104	1146.79	-10.5251	776.953	1173.11	307.095	685.699	1126.81	160.346	740.74	784.794	-89.6094	472.005	843.97	-36.8802	494.05	847.253	36.2934	401.555	845.003	12.9501	304.693	821.763	5.12362	775.451	806.619	414.897	509.101	826.399	433.191	514.453	849.935	362.733	426.288	848.91	394.039	320.7	821.413	368.566
110	1.09	627.06	1339.24	141.517	663.023	1328.48	72.251	674.718	1342.15	202.707	743.121	1146.71	-10.5729	776.969	1173.14	307.064	685.621	1126.82	160.352	740.718	784.678	-89.6486	472.034	843.922	-36.9322	494.109	847.242	36.2493	401.563	844.988	12.9275	304.691	821.755	5.10199	775.45	806.634	414.911	509.092	826.399	433.17	514.471	849.955	362.719	426.296	848.892	394.012	320.71	821.383	368.534
111	1.1	626.978	1339.23	141.408	663.039	1328.45	72.1468	674.686	1342.16	202.636	743.139	1146.64	-10.6213	776.934	1173.16	307.054	685.523	1126.85	160.318	740.654	784.552	-89.7021	472.053	843.861	-36.9681	494.109	847.233	36.2194	401.53	844.994	12.9112	304.7	821.762	5.07138	775.43	806.619	414.905	509.104	826.41	433.168	514.468	849.981	362.699	426.284	848.896	393.991	320.7	821.354	368.5
112	1.11	626.914	1339.24	141.326	663.051	1328.44	72.0551	674.661	1342.19	202.579	743.122	1146.58	-10.6649	776.895	1173.19	307.064	685.453	1126.89	160.297	740.583	784.443	-89.7595	472.046	843.809	-36.9802	494.108	847.22	36.1845	401.49	845.002	12.9042	304.695	821.754	5.03363	775.405	806.611	414.901	509.1	826.406	433.146	514.468	849.98	362.684	426.265	848.89	393.975	320.669	821.348	368.473
113	1.12	626.93	1339.25	141.236	663.074	1328.42	71.9895	674.677	1342.2	202.519	743.183	1146.52	-10.6876	776.893	1173.18	306.972	685.428	1126.92	160.303	740.544	784.338	-89.7905	472.035	843.779	-36.9844	494.132	847.2	36.1613	401.545	844.977	12.8786	304.718	821.75	5.01664	775.409	806.624	414.914	509.126	826.416	433.141	514.5	849.983	362.681	426.267	848.879	393.965	320.67	821.342	368.467
114	1.13	626.924	1339.28	141.173	663.115	1328.42	71.9249	674.735	1342.22	202.472	743.256	1146.46	-10.6948	776.886	1173.18	306.954	685.515	1126.87	160.262	740.566	784.278	-89.8036	472.083	843.75	-36.9895	494.129	847.192	36.1872	401.577	844.976	12.8498	304.741	821.747	5.02427	775.442	806.648	414.932	509.154	826.406	433.146	514.493	849.977	362.703	426.275	848.878	393.972	320.673	821.342	368.486
115	1.14	626.839	1339.35	141.11	663.148	1328.42	71.8678	674.737	1342.25	202.398	743.287	1146.41	-10.7095	776.894	1173.23	306.937	685.438	1126.87	160.225	740.595	784.268	-89.7714	472.09	843.742	-36.9962	494.118	847.187	36.175	401.536	845.014	12.8617	304.71	821.757	5.02696	775.456	806.67	414.941	509.121	826.397	433.136	514.483	849.961	362.705	426.264	848.883	393.976	320.673	821.345	368.478
116	1.15	626.795	1339.42	141.034	663.152	1328.45	71.8179	674.736	1342.26	202.333	743.357	1146.36	-10.7305	776.93	1173.24	306.893	685.438	1126.89	160.221	740.601	784.222	-89.7663	472.065	843.748	-36.9719	494.103	847.19	36.1829	401.554	845.015	12.8763	304.68	821.788	5.02214	775.483	806.7	414.95	509.138	826.412	433.129	514.471	849.954	362.666	426.259	848.908	393.982	320.665	821.38	368.476
117	1.16	626.824	1339.46	140.947	663.179	1328.48	71.7807	674.772	1342.28	202.293	743.449	1146.32	-10.7387	776.972	1173.26	306.853	685.432	1126.91	160.227	740.631	784.193	-89.7631	472.074	843.757	-36.9517	494.119	847.186	36.1899	401.568	845.021	12.8874	304.686	821.832	5.02355	775.478	806.733	414.952	509.168	826.441	433.156	514.481	849.982	362.664	426.274	848.933	393.988	320.667	821.418	368.501
118	1.17	626.857	1339.47	140.879	663.234	1328.49	71.7276	674.808	1342.3	202.24	743.532	1146.24	-10.7544	776.971	1173.3	306.857	685.293	1126.97	160.235	740.64	784.142	-89.7726	472.099	843.755	-36.9495	494.125	847.173	36.193	401.567	845.033	12.8823	304.691	821.858	5.02333	775.503	806.773	414.973	509.186	826.451	433.174	514.537	850	362.687	426.28	848.934	393.993	320.69	821.421	368.515
119	1.18	627.011	1339.42	140.765	663.31	1328.47	71.6263	674.801	1342.3	202.184	743.586	1146.17	-10.7693	776.943	1173.31	306.836	685.311	1126.97	160.23	740.594	784.045	-89.8105	472.129	843.716	-36.9798	494.155	847.14	36.1783	401.566	845.023	12.8744	304.71	821.834	5.00252	775.546	806.796	414.982	509.136	826.435	433.148	514.518	849.994	362.686	426.276	848.925	393.979	320.687	821.402	368.487
120	1.19	627.189	1339.36	140.667	663.407	1328.44	71.5467	674.812	1342.29	202.133	743.654	1146.1	-10.7939	776.928	1173.32	306.805	685.518	1126.84	160.15	740.551	783.961	-89.8356	472.141	843.659	-37.0043	494.161	847.12	36.1725	401.574	844.997	12.8578	304.695	821.808	4.99326	775.567	806.823	414.995	509.108	826.417	433.122	514.471	849.969	362.667	426.285	848.903	393.976	320.697	821.36	368.471
121	1.2	627.292	1339.32	140.64	663.489	1328.39	71.4897	674.838	1342.29	202.105	743.74	1146.02	-10.806	776.939	1173.33	306.804	685.676	1126.7	160.106	740.579	783.915	-89.8418	472.13	843.596	-36.9771	494.146	847.104	36.1886	401.602	844.985	12.8709	304.698	821.802	5.00495	775.571	806.841	415.015	509.117	826.373	433.132	514.478	849.945	362.677	426.297	848.867	393.979	320.737	821.332	368.494
122	1.21	627.397	1339.28	140.595	663.549	1328.35	71.4338	674.87	1342.3	202.08	743.838	1145.97	-10.8058	776.889	1173.32	306.791	685.695	1126.64	160.128	740.552	783.831	-89.86	472.127	843.56	-36.9616	494.163	847.07	36.2129	401.611	844.987	12.8824	304.723	821.784	5.01379	775.583	806.845	415.026	509.104	826.351	433.176	514.521	849.915	362.721	426.323	848.838	393.997	320.751	821.332	368.539
123	1.22	627.513	1339.27	140.493	663.66	1328.3	71.3276	674.873	1342.28	202.007	743.885	1145.91	-10.8254	776.865	1173.28	306.782	685.528	1126.68	160.128	740.45	783.705	-89.9136	472.18	843.514	-36.9858	494.166	847.047	36.218	401.618	844.98	12.8796	304.725	821.755	4.99636	775.565	806.864	415.057	509.084	826.361	433.187	514.533	849.919	362.737	426.328	848.83	393.995	320.746	821.312	368.537
124	1.23	627.54	1339.27	140.394	663.762	1328.3	71.2209	674.879	1342.28	201.936	743.912	1145.88	-10.8556	776.875	1173.3	306.74	685.472	1126.74	160.087	740.417	783.621	-89.9683	472.234	843.48	-37.0423	494.198	847.057	36.1853	401.612	844.98	12.8448	304.775	821.759	4.94909	775.532	806.872	415.068	509.068	826.386	433.154	514.522	849.937	362.719	426.321	848.837	393.963	320.755	821.291	368.494
125	1.24	627.52	1339.33	140.296	663.806	1328.34	71.1488	674.898	1342.32	201.889	743.935	1145.86	-10.8858	776.887	1173.36	306.693	685.588	1126.8	160.017	740.39	783.576	-89.9807	472.238	843.507	-37.076	494.207	847.088	36.1574	401.616	845.003	12.8207	304.775	821.794	4.90532	775.484	806.861	415.072	509.117	826.409	433.14	514.498	849.953	362.686	426.322	848.863	393.947	320.753	821.31	368.466
126	1.25	627.453	1339.42	140.205	663.788	1328.38	71.0969	674.88	1342.38	201.847	743.954	1145.84	-10.9046	776.867	1173.37	306.677	685.461	1126.95	160.023	740.388	783.562	-89.9739	472.199	843.558	-37.0658	494.228	847.101	36.1269	401.59	845.037	12.8152	304.71	821.841	4.90773	775.471	806.865	415.081	509.172	826.444	433.157	514.496	849.992	362.671	426.298	848.926	393.961	320.7	821.365	368.472
127	1.26	627.489	1339.49	140.138	663.796	1328.41	71.0589	674.853	1342.42	201.795	743.991	1145.81	-10.9161	776.75	1173.34	306.583	685.26	1127.1	160.024	740.413	783.551	-89.9656	472.163	843.595	-37.0506	494.254	847.095	36.0844	401.602	845.037	12.809	304.664	821.868	4.90905	775.482	806.887	415.113	509.166	826.458	433.158	514.46	850.01	362.648	426.27	848.968	393.972	320.64	821.427	368.48
128	1.27	627.599	1339.5	140.095	663.866	1328.39	70.987	674.921	1342.46	201.737	744.047	1145.78	-10.9312	776.619	1173.28	306.455	685.186	1127.11	160.006	740.41	783.524	-89.9819	472.192	843.585	-37.0621	494.276	847.057	36.0679	401.619	845.046	12.7933	304.697	821.856	4.90394	775.467	806.904	415.108	509.153	826.453	433.147	514.468	850.006	362.626	426.265	848.964	393.969	320.628	821.433	368.48
129	1.28	627.771	1339.47	140.048	663.993	1328.34	70.9135	674.957	1342.45	201.683	744.102	1145.73	-10.9387	776.701	1173.32	306.485	685.367	1126.94	159.995	740.364	783.456	-90.0172	472.214	843.549	-37.0635	494.29	847.036	36.0835	401.64	845.032	12.7928	304.755	821.814	4.90004	775.459	806.923	415.116	509.159	826.426	433.141	514.499	849.962	362.649	426.265	848.937	393.974	320.66	821.4	368.482
130	1.29	627.922	1339.43	139.986	664.058	1328.3	70.8645	674.942	1342.43	201.66	744.154	1145.67	-10.9365	776.413	1173.25	306.33	685.537	1126.81	160.012	740.286	783.394	-90.0114	472.195	843.535	-37.0604	494.224	847.044	36.1132	401.594	844.999	12.8137	304.769	821.773	4.91927	775.445	806.92	415.124	509.128	826.403	433.148	514.489	849.906	362.691	426.237	848.919	393.999	320.674	821.367	368.511
131	1.3	628.016	1339.41	139.927	664.094	1328.29	70.8218	674.951	1342.42	201.633	744.206	1145.62	-10.9343	776.481	1173.27	306.375	685.509	1126.75	160.009	740.197	783.33	-90.0416	472.166	843.551	-37.0381	494.159	847.052	36.1544	401.581	844.989	12.8439	304.747	821.757	4.95797	775.495	806.947	415.132	509.086	826.38	433.164	514.505	849.897	362.704	426.241	848.906	394.024	320.666	821.348	368.539
132	1.31	628.112	1339.4	139.83	664.145	1328.28	70.7646	674.944	1342.42	201.563	744.248	1145.6	-10.9521	776.81	1173.36	306.55	685.411	1126.8	160.02	740.068	783.235	-90.1068	472.131	843.576	-37.0227	494.147	847.083	36.1599	401.623	844.991	12.8196	304.707	821.771	4.98446	775.493	806.976	415.135	509.079	826.385	433.152	514.479	849.919	362.709	426.267	848.901	394.014	320.643	821.353	368.527
133	1.32	628.15	1339.41	139.756	664.196	1328.29	70.6966	674.982	1342.44	201.484	744.275	1145.58	-10.9763	776.751	1173.37	306.484	685.289	1126.9	160.003	740.001	783.196	-90.1488	472.095	843.61	-37.0295	494.137	847.122	36.1585	401.607	845.005	12.8147	304.709	821.774	4.96693	775.491	806.984	415.131	509.11	826.414	433.144	514.47	849.921	362.694	426.286	848.884	393.992	320.654	821.343	368.506
134	1.33	628.319	1339.35	139.64	664.239	1328.29	70.6234	674.992	1342.45	201.411	744.302	1145.57	-10.9861	776.523	1173.33	306.387	685.271	1126.93	159.981	739.937	783.148	-90.1555	472.076	843.656	-37.0497	494.11	847.165	36.1698	401.566	845.045	12.8426	304.721	821.772	4.94811	775.508	807.015	415.151	509.115	826.44	433.148	514.467	849.954	362.671	426.279	848.881	393.966	320.679	821.333	368.485
135	1.34	628.363	1339.36	139.556	664.298	1328.32	70.5716	674.989	1342.47	201.345	744.331	1145.56	-10.9999	776.617	1173.4	306.523	685.298	1126.95	159.965	739.912	783.134	-90.1569	472.064	843.716	-37.0461	494.067	847.216	36.1792	401.492	845.084	12.8753	304.682	821.809	4.96011	775.536	807.037	415.164	509.13	826.455	433.165	514.426	849.96	362.666	426.259	848.901	393.952	320.677	821.34	368.483
136	1.35	628.286	1339.45	139.516	664.361	1328.35	70.5176	675.009	1342.49	201.311	744.374	1145.53	-11.0099	776.841	1173.46	306.628	685.386	1126.95	159.911	739.937	783.143	-90.1462	472.044	843.788	-37.0384	494.076	847.257	36.1711	401.473	845.09	12.8708	304.675	821.827	4.97278	775.586	807.065	415.167	509.151	826.439	433.163	514.389	849.942	362.654	426.254	848.932	393.973	320.67	821.376	368.506
137	1.36	628.264	1339.51	139.502	664.408	1328.35	70.4797	675.044	1342.52	201.273	744.404	1145.5	-11.0056	776.811	1173.48	306.622	685.549	1126.9	159.88	739.919	783.116	-90.1449	471.994	843.853	-37.0238	494.062	847.285	36.1644	401.491	845.105	12.8654	304.672	821.81	4.98918	775.59	807.066	415.173	509.128	826.414	433.134	514.449	849.949	362.656	426.278	848.936	393.989	320.689	821.392	368.513
138	1.37	628.365	1339.5	139.446	664.422	1328.36	70.4482	675.06	1342.53	201.234	744.431	1145.47	-11.016	776.696	1173.47	306.552	685.535	1126.89	159.899	739.852	783.066	-90.1612	471.966	843.918	-36.9999	494.028	847.32	36.1803	401.462	845.126	12.8865	304.674	821.811	5.00183	775.577	807.072	415.176	509.117	826.404	433.119	514.501	849.947	362.679	426.299	848.924	393.995	320.677	821.388	368.527
139	1.38	628.388	1339.51	139.386	664.429	1328.33	70.4114	675.062	1342.52	201.192	744.473	1145.44	-11.0428	776.844	1173.48	306.584	685.499	1126.87	159.875	739.789	783.004	-90.1748	471.955	843.946	-36.9943	494.028	847.355	36.1891	401.446	845.149	12.8776	304.628	821.826	4.99948	775.583	807.077	415.203	509.088	826.402	433.124	514.452	849.921	362.66	426.311	848.926	393.99	320.654	821.397	368.528
140	1.39	628.355	1339.53	139.348	664.464	1328.32	70.3614	675.05	1342.53	201.135	744.508	1145.41	-11.0717	776.813	1173.45	306.475	685.404	1126.9	159.855	739.725	782.962	-90.2168	471.953	843.97	-37.0126	494.047	847.356	36.1749	401.436	845.156	12.868	304.626	821.832	4.99456	775.578	807.058	415.184	509.119	826.431	433.107	514.394	849.925	362.603	426.316	848.921	393.969	320.668	821.376	368.522
141	1.4	628.395	1339.52	139.288	664.508	1328.31	70.3014	675.06	1342.53	201.075	744.551	1145.38	-11.0915	776.715	1173.44	306.449	685.35	1126.93	159.849	739.674	782.928	-90.2615	471.989	843.965	-37.0349	494.064	847.369	36.1648	401.447	845.172	12.8727	304.62	821.828	4.99181	775.606	807.059	415.183	509.12	826.429	433.101	514.411	849.948	362.602	426.311	848.918	393.956	320.675	821.339	368.508
142	1.41	628.435	1339.48	139.228	664.555	1328.28	70.2341	675.041	1342.54	201.033	744.583	1145.34	-11.0885	776.723	1173.44	306.5	685.34	1126.93	159.845	739.679	782.897	-90.2997	472.009	843.944	-37.0494	494.098	847.357	36.1348	401.468	845.173	12.842	304.633	821.791	4.98731	775.576	807.042	415.209	509.105	826.426	433.105	514.45	849.942	362.62	426.316	848.909	393.954	320.66	821.317	368.492
143	1.42	628.48	1339.47	139.169	664.621	1328.26	70.1816	675.01	1342.55	200.999	744.594	1145.31	-11.0938	776.628	1173.41	306.442	685.343	1126.85	159.869	739.679	782.884	-90.3502	472.005	843.923	-37.0461	494.084	847.336	36.1415	401.482	845.156	12.8143	304.651	821.761	4.98495	775.556	807.035	415.206	509.106	826.421	433.094	514.46	849.916	362.623	426.32	848.91	393.956	320.658	821.334	368.497
144	1.43	628.55	1339.46	139.148	664.655	1328.25	70.1721	675.004	1342.56	200.972	744.632	1145.28	-11.0989	776.722	1173.41	306.432	685.328	1126.82	159.899	739.667	782.855	-90.3876	471.983	843.904	-37.0225	494.073	847.31	36.1598	401.456	845.144	12.8326	304.645	821.739	5.01938	775.578	807.051	415.183	509.078	826.401	433.084	514.424	849.895	362.626	426.297	848.929	393.983	320.686	821.356	368.528
145	1.44	628.52	1339.47	139.147	664.693	1328.24	70.1639	674.999	1342.56	200.984	744.669	1145.24	-11.0917	776.52	1173.36	306.326	685.458	1126.75	159.89	739.663	782.841	-90.3892	471.946	843.899	-36.9952	494.085	847.288	36.1493	401.46	845.131	12.8551	304.638	821.721	5.04406	775.54	807.034	415.161	509.096	826.389	433.111	514.448	849.893	362.657	426.284	848.929	394.02	320.707	821.376	368.562
146	1.45	628.514	1339.48	139.112	664.694	1328.22	70.1466	674.981	1342.56	200.966	744.698	1145.21	-11.084	776.494	1173.33	306.301	685.44	1126.76	159.882	739.631	782.799	-90.3911	471.941	843.896	-36.984	494.072	847.282	36.151	401.446	845.121	12.8612	304.652	821.697	5.04138	775.513	807.025	415.167	509.102	826.378	433.124	514.435	849.886	362.664	426.28	848.911	394.025	320.69	821.371	368.579
147	1.46	628.546	1339.47	139.05	664.719	1328.2	70.0903	674.957	1342.53	200.9	744.718	1145.17	-11.1098	776.729	1173.41	306.526	685.42	1126.78	159.864	739.587	782.747	-90.4336	471.965	843.887	-37.0218	494.049	847.291	36.1508	401.431	845.122	12.8637	304.661	821.697	5.02692	775.518	807.035	415.169	509.075	826.371	433.116	514.329	849.852	362.633	426.272	848.889	393.996	320.662	821.348	368.555
148	1.47	628.607	1339.41	138.965	664.758	1328.19	70.0297	674.951	1342.51	200.834	744.777	1145.15	-11.1389	776.772	1173.44	306.543	685.336	1126.86	159.818	739.537	782.712	-90.4859	471.983	843.904	-37.0445	494.068	847.325	36.1497	401.416	845.158	12.8647	304.667	821.717	5.00016	775.53	807.031	415.151	509.093	826.387	433.096	514.348	849.882	362.61	426.27	848.876	393.957	320.66	821.317	368.509
149	1.48	628.631	1339.37	138.911	664.779	1328.18	69.9861	674.982	1342.51	200.785	744.836	1145.13	-11.1513	776.693	1173.45	306.468	685.353	1126.92	159.763	739.525	782.674	-90.498	471.97	843.962	-37.0661	494.089	847.358	36.1277	401.403	845.198	12.8481	304.681	821.735	4.97417	775.536	807.043	415.157	509.12	826.407	433.077	514.396	849.917	362.6	426.287	848.884	393.946	320.662	821.307	368.476
150	1.49	628.546	1339.38	138.868	664.786	1328.21	69.9518	674.969	1342.53	200.758	744.897	1145.11	-11.1547	776.564	1173.45	306.446	685.251	1127.01	159.767	739.536	782.658	-90.4732	471.93	844.043	-37.0853	494.054	847.4	36.1279	401.416	845.213	12.8272	304.652	821.771	4.9704	775.562	807.061	415.194	509.115	826.43	433.088	514.403	849.964	362.596	426.282	848.915	393.93	320.621	821.341	368.465
151	1.5	628.458	1339.44	138.849	664.758	1328.26	69.9273	674.927	1342.55	200.746	744.955	1145.12	-11.153	776.733	1173.49	306.507	685.071	1127.04	159.791	739.518	782.666	-90.4575	471.916	844.103	-37.0804	494.015	847.439	36.1344	401.447	845.244	12.807	304.587	821.828	4.98504	775.551	807.068	415.192	509.106	826.44	433.094	514.416	849.977	362.589	426.26	848.958	393.939	320.593	821.395	368.464
152	1.51	628.385	1339.52	138.856	664.789	1328.29	69.9031	674.922	1342.56	200.736	745.022	1145.12	-11.1535	776.819	1173.51	306.518	685.16	1126.94	159.751	739.514	782.717	-90.4532	471.887	844.148	-37.0422	494.028	847.442	36.1225	401.471	845.265	12.7959	304.577	821.841	5.01579	775.55	807.081	415.169	509.125	826.445	433.079	514.425	849.984	362.587	426.257	848.987	393.954	320.635	821.424	368.5
153	1.52	628.382	1339.55	138.837	664.829	1328.28	69.8862	674.917	1342.55	200.718	745.073	1145.1	-11.1537	776.746	1173.5	306.491	685.399	1126.83	159.705	739.505	782.723	-90.4647	471.855	844.157	-37.0215	494.034	847.409	36.1256	401.469	845.26	12.8219	304.599	821.821	5.04336	775.543	807.093	415.178	509.122	826.436	433.094	514.428	849.953	362.594	426.269	848.976	393.97	320.667	821.421	368.533
154	1.53	628.461	1339.5	138.785	664.81	1328.25	69.8783	674.889	1342.53	200.691	745.109	1145.06	-11.1547	776.592	1173.49	306.447	685.437	1126.77	159.707	739.501	782.676	-90.4796	471.882	844.121	-37.0074	494.024	847.404	36.1474	401.458	845.243	12.8568	304.612	821.804	5.07029	775.545	807.107	415.21	509.103	826.408	433.112	514.408	849.926	362.605	426.289	848.947	393.973	320.661	821.398	368.536
155	1.54	628.484	1339.43	138.723	664.795	1328.19	69.8441	674.858	1342.51	200.649	745.13	1145.01	-11.1744	776.722	1173.49	306.523	685.427	1126.67	159.737	739.516	782.636	-90.5286	471.88	844.064	-37.0053	494.001	847.383	36.1713	401.431	845.226	12.887	304.606	821.77	5.07621	775.556	807.119	415.224	509.087	826.389	433.123	514.387	849.916	362.628	426.293	848.898	393.97	320.669	821.357	368.519
156	1.55	628.539	1339.32	138.66	664.824	1328.14	69.8118	674.835	1342.49	200.6	745.155	1144.95	-11.2021	776.615	1173.47	306.471	685.515	1126.63	159.686	739.49	782.589	-90.5911	471.872	844.025	-37.025	493.988	847.361	36.1711	401.405	845.223	12.9125	304.599	821.746	5.06332	775.574	807.135	415.214	509.136	826.397	433.138	514.378	849.913	362.628	426.307	848.859	393.953	320.669	821.312	368.499
157	1.56	628.55	1339.27	138.594	664.853	1328.09	69.7579	674.836	1342.47	200.535	745.162	1144.89	-11.2197	776.477	1173.46	306.394	685.508	1126.67	159.656	739.455	782.51	-90.6313	471.877	843.98	-37.0543	494.011	847.34	36.1546	401.403	845.22	12.899	304.61	821.743	5.04826	775.579	807.133	415.219	509.134	826.398	433.123	514.398	849.909	362.64	426.312	848.828	393.928	320.688	821.291	368.489
158	1.57	628.54	1339.3	138.5	664.879	1328.08	69.6767	674.797	1342.47	200.458	745.157	1144.84	-11.2594	776.653	1173.49	306.483	685.299	1126.78	159.642	739.447	782.445	-90.661	471.91	843.943	-37.0837	494.005	847.328	36.1285	401.42	845.235	12.8468	304.621	821.743	5.02796	775.562	807.134	415.242	509.094	826.403	433.101	514.373	849.918	362.631	426.294	848.84	393.918	320.646	821.262	368.459
159	1.58	628.501	1339.35	138.428	664.87	1328.08	69.6406	674.789	1342.5	200.405	745.177	1144.82	-11.2829	776.681	1173.52	306.489	685.166	1126.84	159.663	739.47	782.409	-90.6837	471.927	843.949	-37.0909	494.029	847.318	36.1006	401.421	845.23	12.8201	304.629	821.745	5.01809	775.57	807.142	415.25	509.114	826.424	433.112	514.365	849.908	362.608	426.296	848.872	393.912	320.642	821.289	368.462
160	1.59	628.477	1339.43	138.395	664.855	1328.11	69.6274	674.812	1342.53	200.371	745.214	1144.8	-11.2638	776.58	1173.52	306.416	685.209	1126.79	159.637	739.463	782.38	-90.7122	471.93	843.962	-37.0869	494.047	847.302	36.0857	401.443	845.221	12.836	304.638	821.753	5.01753	775.573	807.136	415.25	509.134	826.422	433.116	514.441	849.925	362.635	426.302	848.916	393.941	320.675	821.341	368.51
161	1.6	628.475	1339.51	138.35	664.85	1328.14	69.5832	674.822	1342.56	200.329	745.266	1144.8	-11.2611	776.476	1173.5	306.349	685.244	1126.71	159.633	739.466	782.366	-90.6997	471.932	843.989	-37.0917	494.11	847.282	36.0818	401.461	845.214	12.8448	304.656	821.754	5.02352	775.562	807.132	415.264	509.136	826.414	433.119	514.464	849.935	362.646	426.317	848.942	393.962	320.698	821.393	368.539
162	1.61	628.434	1339.58	138.291	664.859	1328.14	69.5296	674.785	1342.58	200.266	745.282	1144.79	-11.2546	776.619	1173.52	306.468	685.146	1126.73	159.638	739.48	782.36	-90.6761	471.943	843.988	-37.0999	494.108	847.268	36.0569	401.506	845.199	12.8079	304.645	821.765	5.0115	775.534	807.123	415.294	509.126	826.419	433.122	514.416	849.928	362.619	426.306	848.961	393.967	320.685	821.421	368.519
163	1.62	628.329	1339.61	138.234	664.855	1328.13	69.498	674.709	1342.59	200.229	745.271	1144.78	-11.2572	776.593	1173.53	306.494	685.129	1126.73	159.639	739.473	782.351	-90.6736	471.91	844.014	-37.0824	494.108	847.275	36.0485	401.513	845.196	12.7924	304.611	821.769	5.01788	775.531	807.141	415.313	509.125	826.429	433.115	514.385	849.939	362.622	426.269	848.987	393.977	320.676	821.433	368.519
164	1.63	628.282	1339.56	138.224	664.845	1328.1	69.4889	674.695	1342.59	200.213	745.277	1144.77	-11.2527	776.583	1173.55	306.496	685.267	1126.67	159.623	739.438	782.365	-90.6922	471.9	844.029	-37.0541	494.097	847.32	36.0776	401.48	845.212	12.8451	304.606	821.772	5.04098	775.551	807.153	415.307	509.111	826.451	433.119	514.461	849.958	362.654	426.269	848.988	393.979	320.662	821.414	368.522
165	1.64	628.349	1339.41	138.123	664.856	1328.05	69.4799	674.682	1342.56	200.159	745.297	1144.76	-11.2463	776.571	1173.57	306.481	685.374	1126.63	159.615	739.403	782.376	-90.6912	471.919	844.029	-37.0667	494.09	847.328	36.0915	401.47	845.235	12.8742	304.629	821.77	5.0437	775.565	807.168	415.313	509.09	826.455	433.116	514.468	849.99	362.669	426.266	848.958	393.968	320.64	821.381	368.506
166	1.65	628.416	1339.24	138.028	664.865	1327.97	69.4289	674.637	1342.53	200.119	745.304	1144.72	-11.2798	776.47	1173.54	306.416	685.356	1126.56	159.603	739.37	782.372	-90.718	471.884	844.019	-37.0869	494.031	847.332	36.1082	401.43	845.255	12.8712	304.592	821.757	5.03335	775.539	807.169	415.329	509.087	826.448	433.125	514.4	849.965	362.642	426.236	848.907	393.946	320.602	821.341	368.47
167	1.66	628.447	1339.11	137.994	664.881	1327.92	69.391	674.643	1342.5	200.091	745.342	1144.7	-11.2985	776.375	1173.5	306.341	685.305	1126.55	159.604	739.326	782.354	-90.7384	471.875	844.031	-37.092	493.995	847.35	36.1309	401.399	845.27	12.8796	304.575	821.745	5.03775	775.522	807.174	415.314	509.081	826.429	433.12	514.375	849.948	362.628	426.247	848.863	393.93	320.617	821.309	368.479
168	1.67	628.465	1339.07	137.993	664.875	1327.9	69.4041	674.663	1342.47	200.099	745.412	1144.68	-11.2954	776.531	1173.52	306.423	685.43	1126.49	159.597	739.278	782.338	-90.7558	471.884	844.061	-37.075	494.027	847.362	36.1389	401.41	845.277	12.9048	304.588	821.741	5.0685	775.532	807.176	415.282	509.089	826.434	433.138	514.424	849.943	362.638	426.271	848.857	393.925	320.669	821.295	368.497
169	1.68	628.484	1339.05	137.997	664.86	1327.9	69.4114	674.634	1342.46	200.094	745.481	1144.69	-11.2862	776.625	1173.51	306.449	685.519	1126.47	159.565	739.291	782.345	-90.7202	471.868	844.098	-37.0545	494.016	847.368	36.1623	401.429	845.284	12.9086	304.607	821.744	5.08097	775.56	807.17	415.273	509.1	826.435	433.141	514.432	849.934	362.647	426.279	848.87	393.942	320.679	821.311	368.517
170	1.69	628.378	1339.1	137.981	664.778	1327.93	69.4378	674.6	1342.45	200.088	745.505	1144.71	-11.2825	776.69	1173.49	306.464	685.518	1126.45	159.539	739.28	782.348	-90.666	471.812	844.175	-37.0239	493.981	847.384	36.1713	401.389	845.305	12.9155	304.572	821.754	5.08651	775.521	807.126	415.258	509.084	826.411	433.11	514.376	849.913	362.629	426.258	848.9	393.957	320.637	821.356	368.522
171	1.7	628.287	1339.17	137.999	664.788	1327.97	69.4527	674.558	1342.46	200.097	745.541	1144.73	-11.2833	776.753	1173.49	306.465	685.529	1126.48	159.512	739.271	782.381	-90.6559	471.791	844.24	-37.0165	493.949	847.395	36.1692	401.357	845.326	12.9092	304.546	821.764	5.09318	775.543	807.112	415.217	509.099	826.41	433.1	514.343	849.902	362.614	426.269	848.944	393.96	320.636	821.418	368.543
172	1.71	628.26	1339.18	138.011	664.829	1328	69.4496	674.571	1342.46	200.099	745.587	1144.75	-11.289	776.77	1173.49	306.455	685.536	1126.53	159.529	739.246	782.383	-90.6829	471.815	844.303	-37.0205	493.973	847.442	36.1592	401.403	845.344	12.9003	304.537	821.79	5.09566	775.555	807.098	415.173	509.145	826.419	433.096	514.408	849.905	362.605	426.287	848.973	393.972	320.667	821.433	368.546
173	1.72	628.278	1339.15	138.005	664.841	1327.99	69.4291	674.582	1342.45	200.094	745.623	1144.75	-11.2929	776.785	1173.47	306.455	685.522	1126.62	159.514	739.271	782.364	-90.6927	471.825	844.364	-37.0358	494.041	847.451	36.1417	401.423	845.351	12.9067	304.554	821.799	5.09819	775.545	807.08	415.147	509.15	826.428	433.074	514.433	849.93	362.57	426.273	848.979	393.973	320.677	821.446	368.527
174	1.73	628.399	1339.21	137.967	664.851	1327.95	69.3944	674.624	1342.44	200.068	745.659	1144.74	-11.3234	776.745	1173.45	306.385	685.324	1126.74	159.541	739.244	782.351	-90.7325	471.808	844.388	-37.0586	494.067	847.473	36.1233	401.418	845.373	12.9177	304.549	821.789	5.08454	775.55	807.055	415.138	509.147	826.445	433.065	514.416	849.95	362.542	426.259	848.972	393.944	320.643	821.423	368.486
175	1.74	628.594	1339.29	137.931	664.956	1327.9	69.3426	674.722	1342.44	200.046	745.697	1144.72	-11.3382	776.57	1173.4	306.273	685.26	1126.77	159.567	739.177	782.339	-90.8218	471.851	844.398	-37.0693	494.081	847.516	36.1189	401.389	845.38	12.9366	304.574	821.762	5.08355	775.554	807.033	415.101	509.144	826.46	433.068	514.485	849.964	362.579	426.296	848.941	393.913	320.638	821.373	368.451
176	1.75	628.602	1339.08	137.927	665.024	1327.89	69.3342	674.773	1342.42	200.043	745.708	1144.71	-11.3415	776.599	1173.39	306.302	685.524	1126.67	159.55	739.108	782.331	-90.8877	471.885	844.441	-37.0783	494.076	847.525	36.1285	401.411	845.379	12.9402	304.616	821.719	5.10511	775.545	807.018	415.072	509.18	826.462	433.082	514.538	849.966	362.612	426.347	848.899	393.907	320.678	821.312	368.458
177	1.76	628.591	1339.02	137.938	665.039	1327.88	69.3656	674.78	1342.41	200.059	745.712	1144.71	-11.3177	776.778	1173.44	306.43	685.655	1126.56	159.561	739.038	782.35	-90.9089	471.847	844.503	-37.0552	494.052	847.524	36.1352	401.431	845.376	12.927	304.623	821.688	5.12023	775.523	807.004	415.081	509.176	826.433	433.076	514.486	849.937	362.583	426.316	848.895	393.914	320.703	821.305	368.493
178	1.77	628.569	1339.06	137.989	665.042	1327.91	69.4015	674.808	1342.43	200.084	745.711	1144.72	-11.2831	776.87	1173.43	306.466	685.709	1126.48	159.561	738.991	782.39	-90.9225	471.833	844.561	-37.0312	494.019	847.542	36.1609	401.403	845.389	12.9359	304.594	821.687	5.13668	775.537	806.997	415.083	509.111	826.383	433.066	514.459	849.927	362.586	426.292	848.899	393.93	320.714	821.326	368.502
179	1.78	628.56	1339.13	138.046	665.073	1327.95	69.4403	674.892	1342.47	200.134	745.731	1144.74	-11.2522	776.865	1173.41	306.487	685.643	1126.49	159.62	738.933	782.427	-90.9488	471.789	844.625	-36.9866	493.982	847.561	36.1954	401.384	845.401	12.9645	304.58	821.685	5.17066	775.54	806.991	415.075	509.064	826.361	433.09	514.434	849.893	362.625	426.293	848.91	393.965	320.709	821.366	368.539
180	1.79	628.59	1339.2	138.087	665.111	1327.98	69.4772	674.892	1342.47	200.168	745.732	1144.75	-11.2285	776.842	1173.38	306.482	685.598	1126.52	159.623	738.879	782.457	-90.9696	471.749	844.683	-36.9693	493.946	847.588	36.205	401.366	845.429	12.9903	304.562	821.689	5.19079	775.536	806.986	415.087	509.068	826.366	433.104	514.427	849.876	362.622	426.289	848.927	393.986	320.689	821.399	368.569
181	1.8	628.595	1339.32	138.114	665.152	1328.01	69.4743	674.898	1342.47	200.174	745.721	1144.75	-11.2308	776.821	1173.38	306.481	685.689	1126.52	159.623	738.86	782.485	-91.0157	471.718	844.722	-36.9728	493.924	847.628	36.2195	401.331	845.459	13.0015	304.565	821.691	5.175	775.521	806.981	415.107	509.086	826.379	433.079	514.38	849.868	362.599	426.294	848.921	393.97	320.665	821.383	368.552
182	1.81	628.663	1339.34	138.087	665.224	1328.06	69.4713	674.931	1342.51	200.181	745.701	1144.76	-11.2355	776.834	1173.39	306.486	685.689	1126.52	159.581	738.848	782.518	-91.068	471.703	844.761	-36.9742	493.901	847.649	36.212	401.301	845.491	13.0099	304.548	821.713	5.16135	775.502	806.973	415.13	509.099	826.402	433.072	514.349	849.853	362.591	426.301	848.927	393.944	320.651	821.381	368.527
183	1.82	628.646	1339.42	138.12	665.249	1328.12	69.5011	674.993	1342.53	200.232	745.676	1144.78	-11.2195	776.867	1173.41	306.471	685.614	1126.58	159.582	738.804	782.527	-91.0797	471.692	844.812	-36.9546	493.876	847.677	36.2139	401.289	845.522	13.0305	304.527	821.746	5.16564	775.515	806.98	415.132	509.118	826.43	433.085	514.367	849.872	362.583	426.314	848.942	393.956	320.654	821.389	368.532
184	1.83	628.684	1339.45	138.177	665.265	1328.16	69.5365	674.968	1342.55	200.272	745.673	1144.78	-11.1995	776.876	1173.41	306.442	685.56	1126.67	159.624	738.798	782.557	-91.0874	471.669	844.857	-36.9227	493.891	847.7	36.2335	401.317	845.556	13.0098	304.528	821.763	5.187	775.527	807.008	415.144	509.097	826.427	433.095	514.419	849.919	362.611	426.29	848.947	393.965	320.645	821.382	368.527
185	1.84	628.748	1339.47	138.177	665.326	1328.17	69.543	674.998	1342.56	200.269	745.653	1144.78	-11.1815	776.874	1173.42	306.477	685.587	1126.64	159.632	738.789	782.574	-91.1093	471.672	844.87	-36.9254	493.901	847.699	36.2509	401.31	845.586	13.0037	304.52	821.776	5.18686	775.543	807.017	415.179	509.074	826.435	433.09	514.439	849.931	362.608	426.266	848.941	393.951	320.634	821.381	368.512
186	1.85	628.784	1339.43	138.209	665.349	1328.18	69.5534	675.042	1342.55	200.286	745.632	1144.79	-11.1817	776.853	1173.41	306.464	685.606	1126.64	159.665	738.784	782.58	-91.1122	471.69	844.865	-36.9465	493.919	847.689	36.2533	401.308	845.587	13.0023	304.511	821.774	5.17098	775.571	807.023	415.178	509.09	826.433	433.083	514.417	849.919	362.579	426.268	848.927	393.927	320.637	821.375	368.497
187	1.86	628.843	1339.42	138.289	665.351	1328.18	69.5931	675.092	1342.54	200.337	745.633	1144.79	-11.1638	776.718	1173.35	306.416	685.664	1126.58	159.681	738.751	782.578	-91.1319	471.67	844.848	-36.9292	493.903	847.67	36.2534	401.309	845.573	13.0038	304.515	821.749	5.17671	775.566	806.993	415.133	509.095	826.399	433.072	514.396	849.905	362.598	426.27	848.908	393.93	320.623	821.374	368.51
188	1.87	628.783	1339.5	138.395	665.33	1328.19	69.6443	675.091	1342.55	200.428	745.619	1144.8	-11.1226	776.594	1173.28	306.274	685.559	1126.61	159.698	738.756	782.572	-91.1326	471.683	844.839	-36.9087	493.887	847.648	36.2598	401.349	845.567	13.0234	304.512	821.73	5.18764	775.543	806.965	415.119	509.092	826.394	433.08	514.412	849.887	362.598	426.264	848.917	393.941	320.646	821.365	368.516
189	1.88	628.814	1339.54	138.455	665.345	1328.19	69.6907	675.07	1342.55	200.487	745.606	1144.79	-11.1161	776.816	1173.33	306.467	685.511	1126.66	159.739	738.768	782.572	-91.1234	471.692	844.826	-36.9148	493.914	847.627	36.2656	401.357	845.566	13.0228	304.526	821.716	5.196	775.568	806.947	415.111	509.084	826.383	433.081	514.46	849.891	362.583	426.276	848.922	393.948	320.663	821.363	368.521
190	1.89	628.761	1339.57	138.521	665.356	1328.19	69.7253	675.091	1342.53	200.544	745.625	1144.8	-11.1053	776.87	1173.3	306.561	685.644	1126.61	159.76	738.816	782.583	-91.101	471.704	844.808	-36.9248	493.92	847.603	36.2741	401.329	845.558	13.0201	304.534	821.71	5.17826	775.581	806.905	415.078	509.114	826.366	433.075	514.451	849.878	362.578	426.298	848.916	393.947	320.674	821.361	368.546
191	1.9	628.737	1339.57	138.606	665.335	1328.19	69.7758	675.115	1342.52	200.621	745.641	1144.81	-11.0741	776.901	1173.27	306.528	685.675	1126.58	159.808	738.852	782.596	-91.083	471.711	844.799	-36.9142	493.927	847.575	36.2912	401.375	845.563	13.027	304.558	821.71	5.18096	775.543	806.863	415.065	509.152	826.36	433.079	514.452	849.841	362.588	426.314	848.916	393.966	320.694	821.361	368.581
192	1.91	628.778	1339.57	138.667	665.336	1328.18	69.8346	675.16	1342.51	200.694	745.635	1144.81	-11.0514	776.961	1173.25	306.525	685.675	1126.58	159.79	738.841	782.576	-91.0666	471.708	844.785	-36.8883	493.981	847.555	36.2841	401.424	845.569	13.0191	304.578	821.708	5.17938	775.527	806.807	415.041	509.174	826.339	433.074	514.451	849.801	362.601	426.334	848.918	393.978	320.683	821.363	368.588
193	1.92	628.799	1339.52	138.737	665.331	1328.17	69.8772	675.181	1342.48	200.736	745.61	1144.81	-11.0349	777.003	1173.26	306.544	685.629	1126.6	159.803	738.839	782.566	-91.0525	471.733	844.787	-36.8891	494.023	847.541	36.2552	401.381	845.57	13.0245	304.586	821.688	5.18105	775.51	806.763	415.012	509.123	826.309	433.059	514.499	849.802	362.589	426.335	848.917	393.981	320.691	821.349	368.579
194	1.93	628.757	1339.5	138.796	665.336	1328.17	69.9058	675.18	1342.44	200.773	745.592	1144.81	-11.0291	776.821	1173.21	306.487	685.748	1126.57	159.806	738.855	782.573	-91.0706	471.76	844.793	-36.8968	494.027	847.558	36.2424	401.339	845.57	13.0347	304.59	821.678	5.16523	775.526	806.761	414.993	509.082	826.302	433.034	514.487	849.8	362.569	426.344	848.917	393.975	320.695	821.344	368.567
195	1.94	628.832	1339.45	138.837	665.306	1328.16	69.9374	675.142	1342.42	200.835	745.59	1144.81	-11.0256	776.482	1173.12	306.312	685.745	1126.56	159.774	738.811	782.566	-91.0884	471.77	844.811	-36.9148	494.023	847.56	36.2294	401.327	845.575	13.0282	304.604	821.673	5.15214	775.5	806.748	414.983	509.078	826.311	433.036	514.464	849.826	362.571	426.338	848.914	393.956	320.686	821.335	368.554
196	1.95	628.796	1339.41	138.887	665.283	1328.16	69.974	675.14	1342.43	200.885	745.574	1144.83	-11.0029	776.511	1173.15	306.363	685.561	1126.68	159.824	738.762	782.576	-91.1	471.761	844.821	-36.9094	494.035	847.544	36.2174	401.39	845.578	13.0154	304.59	821.68	5.1376	775.475	806.736	414.98	509.074	826.346	433.063	514.417	849.846	362.572	426.308	848.918	393.948	320.668	821.334	368.533
197	1.96	628.786	1339.41	138.923	665.249	1328.17	70.0302	675.105	1342.44	200.914	745.549	1144.87	-10.9669	776.646	1173.22	306.495	685.543	1126.71	159.907	738.756	782.631	-91.1102	471.724	844.836	-36.8892	494.036	847.537	36.2259	401.394	845.607	13.0513	304.577	821.687	5.14864	775.487	806.746	415.007	509.081	826.354	433.076	514.413	849.867	362.583	426.272	848.939	393.945	320.635	821.364	368.536
198	1.97	628.783	1339.42	138.945	665.226	1328.16	70.0853	675.049	1342.44	200.953	745.524	1144.9	-10.9276	776.54	1173.22	306.49	685.658	1126.69	159.906	738.769	782.698	-91.1252	471.724	844.87	-36.8835	494.007	847.561	36.2399	401.366	845.632	13.0614	304.582	821.69	5.1617	775.482	806.769	415.011	509.06	826.353	433.054	514.429	849.914	362.592	426.247	848.96	393.94	320.589	821.396	368.544
199	1.98	628.773	1339.37	138.993	665.234	1328.15	70.116	675.072	1342.43	201.003	745.5	1144.91	-10.8918	776.752	1173.3	306.692	685.752	1126.65	159.899	738.718	782.735	-91.1592	471.714	844.888	-36.8933	494.016	847.587	36.2552	401.371	845.632	13.0546	304.548	821.707	5.15861	775.47	806.784	415.023	509.038	826.368	433.037	514.428	849.906	362.603	426.261	848.951	393.941	320.618	821.384	368.547
200	1.99	628.824	1339.32	139.055	665.213	1328.14	70.1405	675.112	1342.41	201.052	745.515	1144.93	-10.8476	776.821	1173.31	306.759	685.725	1126.61	159.917	738.69	782.757	-91.2008	471.691	844.913	-36.8852	493.967	847.596	36.3004	401.392	845.642	13.0645	304.519	821.721	5.1693	775.469	806.78	415.035	509.048	826.367	433.06	514.44	849.888	362.628	426.29	848.945	393.94	320.656	821.359	368.563
201	2	628.79	1339.29	139.097	665.178	1328.13	70.1926	675.119	1342.39	201.087	745.49	1144.95	-10.8072	776.808	1173.29	306.815	685.717	1126.61	159.963	738.706	782.796	-91.2339	471.676	844.936	-36.8759	493.896	847.611	36.3251	401.395	845.651	13.0805	304.511	821.7	5.19995	775.486	806.78	415.042	509.037	826.355	433.076	514.414	849.872	362.629	426.294	848.934	393.959	320.661	821.362	368.586
202	2.01	628.731	1339.27	139.135	665.147	1328.11	70.2606	675.094	1342.38	201.12	745.446	1144.96	-10.7796	776.773	1173.26	306.85	685.726	1126.64	159.983	738.691	782.831	-91.2666	471.661	844.948	-36.8528	493.89	847.604	36.3275	401.407	845.667	13.0686	304.495	821.687	5.20861	775.52	806.786	415.033	509.033	826.326	433.047	514.434	849.842	362.626	426.293	848.921	393.974	320.669	821.364	368.598
203	2.02	628.778	1339.25	139.162	665.128	1328.08	70.2885	675.104	1342.36	201.146	745.406	1144.98	-10.7601	776.717	1173.23	306.906	685.707	1126.62	159.975	738.69	782.883	-91.3077	471.624	844.955	-36.8447	493.911	847.59	36.3261	401.365	845.688	13.0745	304.478	821.686	5.20506	775.522	806.774	415.024	509.025	826.3	433.047	514.45	849.806	362.625	426.298	848.91	393.968	320.691	821.361	368.593
204	2.03	628.796	1339.24	139.206	665.08	1328.07	70.3138	675.114	1342.34	201.196	745.383	1145	-10.7356	776.729	1173.23	306.928	685.835	1126.58	159.955	738.694	782.914	-91.3603	471.61	844.958	-36.8576	493.951	847.566	36.3022	401.351	845.699	13.0822	304.487	821.691	5.20298	775.507	806.754	415.03	509.043	826.282	433.052	514.46	849.787	362.636	426.309	848.906	393.965	320.689	821.354	368.586
205	2.04	628.759	1339.24	139.211	665.041	1328.07	70.3326	675.104	1342.34	201.216	745.34	1145.03	-10.7239	776.713	1173.24	306.94	685.802	1126.66	159.996	738.698	782.957	-91.3819	471.594	844.949	-36.8645	493.961	847.571	36.2933	401.305	845.694	13.0942	304.487	821.72	5.20318	775.508	806.743	415.011	509.078	826.276	433.026	514.44	849.806	362.602	426.29	848.917	393.961	320.7	821.352	368.578
206	2.05	628.726	1339.23	139.234	665.015	1328.08	70.3493	675.071	1342.35	201.221	745.29	1145.08	-10.7164	776.737	1173.27	306.937	685.695	1126.79	160.014	738.705	783.003	-91.4111	471.588	844.944	-36.8705	493.935	847.584	36.2864	401.307	845.7	13.0871	304.479	821.724	5.20012	775.497	806.739	414.981	509.059	826.279	433.011	514.419	849.826	362.585	426.287	848.938	393.954	320.674	821.362	368.562
207	2.06	628.691	1339.22	139.249	665.024	1328.06	70.3754	675.094	1342.37	201.252	745.266	1145.11	-10.7145	776.752	1173.28	306.962	685.746	1126.86	160.01	738.688	783.017	-91.4605	471.62	844.928	-36.8854	493.957	847.562	36.2456	401.403	845.703	13.0317	304.481	821.709	5.18126	775.512	806.735	414.961	509.075	826.311	433.012	514.456	849.844	362.585	426.309	848.951	393.96	320.645	821.377	368.565
208	2.07	628.702	1339.17	139.255	665.037	1328.04	70.3788	675.126	1342.36	201.267	745.222	1145.13	-10.7072	776.713	1173.27	306.978	685.718	1126.92	160.028	738.68	783.065	-91.5091	471.646	844.916	-36.9009	493.99	847.536	36.2129	401.407	845.684	13.0346	304.517	821.708	5.17097	775.494	806.721	414.951	509.102	826.328	433.029	514.506	849.862	362.598	426.31	848.956	393.949	320.627	821.396	368.559
209	2.08	628.701	1339.14	139.283	665.019	1328.03	70.4039	675.103	1342.33	201.28	745.183	1145.15	-10.707	776.704	1173.29	306.976	685.521	1127	160.073	738.685	783.089	-91.5429	471.668	844.847	-36.9072	494.065	847.505	36.1754	401.406	845.639	13.0387	304.544	821.695	5.16235	775.497	806.714	414.937	509.092	826.331	433.03	514.497	849.843	362.584	426.284	848.954	393.946	320.614	821.384	368.548
210	2.09	628.689	1339.09	139.306	665.036	1327.99	70.4163	675.068	1342.32	201.293	745.148	1145.16	-10.7051	776.685	1173.26	306.995	685.544	1126.98	160.06	738.72	783.109	-91.5826	471.702	844.805	-36.9252	494.1	847.47	36.1683	401.417	845.609	13.0168	304.534	821.667	5.15591	775.509	806.694	414.919	509.071	826.307	433.022	514.478	849.823	362.57	426.275	848.927	393.937	320.634	821.351	368.543
211	2.1	628.754	1339.05	139.31	665.051	1327.93	70.4015	675.086	1342.28	201.324	745.14	1145.18	-10.6966	776.663	1173.23	307.014	685.667	1126.88	160.015	738.729	783.114	-91.6221	471.737	844.776	-36.9286	494.051	847.447	36.2064	401.415	845.603	13.0275	304.529	821.648	5.15693	775.493	806.664	414.907	509.045	826.262	433.036	514.476	849.813	362.599	426.295	848.892	393.939	320.649	821.321	368.542
212	2.11	628.69	1339.07	139.356	665.008	1327.92	70.4345	675.106	1342.25	201.355	745.098	1145.2	-10.681	776.631	1173.23	307.031	685.627	1126.87	160.054	738.734	783.149	-91.6291	471.706	844.767	-36.9058	494.042	847.439	36.2283	401.431	845.609	13.0459	304.531	821.63	5.15865	775.476	806.65	414.905	509.057	826.24	433.061	514.468	849.787	362.612	426.304	848.881	393.965	320.697	821.307	368.553
213	2.12	628.701	1339.08	139.384	664.947	1327.94	70.4858	675.075	1342.24	201.364	745.067	1145.23	-10.6668	776.63	1173.24	307.045	685.513	1126.94	160.039	738.734	783.21	-91.6209	471.667	844.779	-36.8829	494.03	847.447	36.2388	401.44	845.632	13.0532	304.524	821.636	5.17698	775.471	806.658	414.903	509.054	826.25	433.057	514.446	849.777	362.614	426.296	848.876	393.976	320.68	821.312	368.565
214	2.13	628.678	1339.1	139.401	664.938	1327.97	70.4927	675.052	1342.24	201.364	745.04	1145.26	-10.6734	776.578	1173.24	307.075	685.516	1126.97	160.015	738.724	783.244	-91.6391	471.645	844.796	-36.8788	494.011	847.475	36.2523	401.447	845.657	13.0418	304.511	821.648	5.18641	775.47	806.646	414.906	509.045	826.268	433.049	514.423	849.764	362.592	426.298	848.896	393.976	320.679	821.341	368.574
215	2.14	628.664	1339.12	139.401	664.977	1327.99	70.486	675.041	1342.26	201.381	745.011	1145.28	-10.6675	776.526	1173.24	307.096	685.548	1127.01	160.009	738.687	783.28	-91.6336	471.621	844.816	-36.8705	494.008	847.51	36.2468	401.434	845.69	13.0587	304.51	821.662	5.19065	775.464	806.654	414.916	509.058	826.284	433.055	514.415	849.809	362.599	426.29	848.928	393.978	320.69	821.356	368.586
216	2.15	628.634	1339.15	139.412	664.965	1328.02	70.508	675.018	1342.27	201.412	744.963	1145.31	-10.6593	776.534	1173.27	307.079	685.599	1127.05	160.01	738.65	783.31	-91.6371	471.594	844.839	-36.8507	493.99	847.539	36.256	401.398	845.74	13.0624	304.498	821.688	5.20336	775.453	806.675	414.916	509.037	826.302	433.046	514.44	849.837	362.598	426.287	848.957	393.988	320.682	821.363	368.581
217	2.16	628.563	1339.17	139.428	664.94	1328.03	70.5301	675.02	1342.28	201.428	744.918	1145.33	-10.6652	776.547	1173.29	307.083	685.412	1127.18	160.05	738.635	783.334	-91.6511	471.548	844.85	-36.8294	493.942	847.57	36.2761	401.405	845.741	13.0688	304.454	821.709	5.20038	775.469	806.697	414.92	509.007	826.301	433.036	514.411	849.843	362.613	426.285	848.975	394.001	320.651	821.359	368.587
218	2.17	628.61	1339.14	139.411	664.936	1328.03	70.5288	674.999	1342.29	201.421	744.861	1145.35	-10.6876	776.557	1173.3	307.091	685.29	1127.3	160.066	738.618	783.341	-91.6761	471.542	844.845	-36.8379	493.924	847.586	36.2991	401.391	845.728	13.0825	304.453	821.723	5.19466	775.488	806.72	414.917	509.009	826.309	433.039	514.359	849.839	362.597	426.266	848.971	393.99	320.604	821.381	368.577
219	2.18	628.641	1339.09	139.399	664.952	1328.01	70.5198	675.004	1342.26	201.399	744.817	1145.34	-10.7061	776.537	1173.31	307.094	685.369	1127.25	160.022	738.609	783.345	-91.7074	471.517	844.82	-36.8484	493.959	847.565	36.2807	401.4	845.707	13.0679	304.483	821.71	5.18209	775.475	806.714	414.92	509.028	826.316	433.018	514.4	849.855	362.579	426.261	848.963	393.969	320.611	821.368	368.558
220	2.19	628.672	1339.05	139.405	664.948	1327.98	70.511	675.031	1342.24	201.381	744.762	1145.34	-10.7192	776.521	1173.33	307.083	685.476	1127.27	159.968	738.609	783.352	-91.7402	471.51	844.777	-36.8394	493.955	847.552	36.2616	401.385	845.68	13.0308	304.476	821.688	5.15546	775.468	806.704	414.933	509.023	826.301	432.992	514.398	849.842	362.56	426.251	848.943	393.942	320.579	821.353	368.549
221	2.2	628.698	1339.03	139.422	664.935	1327.95	70.5121	675.07	1342.23	201.379	744.701	1145.34	-10.7393	776.533	1173.34	307.09	685.468	1127.3	159.991	738.606	783.352	-91.7868	471.527	844.736	-36.8438	493.948	847.542	36.2696	401.359	845.672	13.0503	304.457	821.687	5.15559	775.485	806.715	414.924	508.996	826.284	432.98	514.366	849.811	362.556	426.238	848.924	393.933	320.568	821.333	368.538
222	2.21	628.73	1338.99	139.431	664.891	1327.94	70.5221	675.101	1342.23	201.382	744.663	1145.33	-10.7366	776.56	1173.35	307.092	685.326	1127.39	160.012	738.634	783.351	-91.7866	471.53	844.699	-36.8393	493.955	847.532	36.2886	401.384	845.666	13.0703	304.456	821.68	5.15545	775.484	806.715	414.931	509.006	826.294	433.001	514.403	849.802	362.581	426.252	848.908	393.947	320.605	821.308	368.564
223	2.22	628.777	1338.99	139.406	664.922	1327.93	70.5155	675.071	1342.23	201.397	744.636	1145.32	-10.7326	776.536	1173.33	307.078	685.268	1127.39	160.009	738.66	783.349	-91.7902	471.55	844.672	-36.8329	493.991	847.51	36.2852	401.394	845.649	13.0666	304.47	821.68	5.16772	775.513	806.717	414.942	509.035	826.297	433.027	514.44	849.807	362.581	426.269	848.908	393.948	320.645	821.301	368.594
224	2.23	628.836	1339	139.387	664.964	1327.92	70.4933	675.083	1342.23	201.392	744.595	1145.31	-10.7439	776.497	1173.32	307.072	685.311	1127.4	160.006	738.655	783.321	-91.8198	471.593	844.646	-36.8352	494.017	847.478	36.2558	401.428	845.642	13.0483	304.493	821.667	5.15984	775.473	806.692	414.933	509.063	826.29	433.031	514.45	849.807	362.575	426.292	848.921	393.959	320.679	821.33	368.615
225	2.24	628.717	1339.12	139.44	664.971	1327.93	70.4983	675.113	1342.25	201.394	744.549	1145.32	-10.7353	776.522	1173.33	307.079	685.406	1127.36	160	738.694	783.351	-91.8246	471.58	844.62	-36.829	494.006	847.461	36.2465	401.435	845.652	13.0628	304.506	821.644	5.15941	775.452	806.693	414.919	509.062	826.266	433.028	514.439	849.8	362.594	426.292	848.938	393.971	320.666	821.348	368.633
226	2.25	628.636	1339.2	139.458	664.959	1327.94	70.5156	675.135	1342.26	201.38	744.514	1145.31	-10.7187	776.503	1173.34	307.111	685.502	1127.33	159.999	738.697	783.359	-91.8199	471.533	844.602	-36.7905	494.027	847.427	36.2579	401.432	845.68	13.0817	304.505	821.639	5.16518	775.479	806.713	414.937	509.077	826.26	433.029	514.451	849.803	362.585	426.288	848.954	393.998	320.656	821.373	368.679
227	2.26	628.685	1339.15	139.441	664.967	1327.93	70.5075	675.136	1342.26	201.372	744.492	1145.32	-10.7365	776.494	1173.36	307.126	685.636	1127.29	160.021	738.658	783.35	-91.8278	471.514	844.579	-36.7748	494.043	847.391	36.2557	401.418	845.68	13.0835	304.487	821.645	5.16671	775.46	806.711	414.926	509.057	826.265	433.027	514.497	849.81	362.579	426.283	848.958	393.998	320.671	821.384	368.681
228	2.27	628.716	1339.09	139.378	664.975	1327.92	70.4559	675.126	1342.26	201.336	744.478	1145.31	-10.7743	776.349	1173.3	306.995	685.579	1127.36	160.017	738.645	783.349	-91.8741	471.523	844.546	-36.8018	493.986	847.413	36.2485	401.412	845.667	13.0699	304.464	821.649	5.13851	775.42	806.698	414.886	509.053	826.285	433.025	514.466	849.828	362.57	426.283	848.952	393.973	320.665	821.364	368.639
229	2.28	628.722	1339	139.308	665	1327.87	70.4007	675.097	1342.25	201.295	744.46	1145.31	-10.809	776.164	1173.24	306.859	685.366	1127.48	160.019	738.639	783.332	-91.9149	471.537	844.534	-36.822	493.972	847.432	36.2503	401.383	845.628	13.0485	304.458	821.645	5.11066	775.43	806.711	414.874	509.034	826.293	433.001	514.41	849.833	362.551	426.292	848.929	393.935	320.645	821.332	368.608
230	2.29	628.759	1338.95	139.253	665.012	1327.83	70.3686	675.067	1342.22	201.246	744.439	1145.32	-10.8191	776.437	1173.36	306.978	685.248	1127.58	159.995	738.618	783.329	-91.9269	471.558	844.51	-36.8312	494.04	847.442	36.2142	401.352	845.63	13.0306	304.482	821.644	5.0934	775.469	806.734	414.873	509.023	826.289	432.995	514.392	849.814	362.54	426.294	848.904	393.914	320.629	821.311	368.59
231	2.3	628.805	1338.93	139.242	665.002	1327.83	70.3566	675.089	1342.23	201.219	744.44	1145.33	-10.8282	776.523	1173.43	306.992	685.313	1127.61	159.982	738.653	783.363	-91.946	471.562	844.498	-36.8427	494.041	847.429	36.226	401.369	845.615	13.0254	304.472	821.664	5.09184	775.483	806.752	414.885	509.04	826.307	432.999	514.399	849.813	362.524	426.293	848.906	393.915	320.645	821.288	368.568
232	2.31	628.807	1338.97	139.244	664.986	1327.85	70.3732	675.116	1342.25	201.234	744.397	1145.35	-10.83	776.516	1173.45	306.995	685.433	1127.6	159.983	738.649	783.38	-91.9647	471.529	844.497	-36.8119	494.024	847.435	36.2408	401.396	845.613	13.0281	304.447	821.686	5.11035	775.484	806.773	414.885	509.076	826.31	432.999	514.394	849.819	362.523	426.291	848.928	393.932	320.647	821.296	368.573
233	2.32	628.76	1339.05	139.245	664.996	1327.87	70.3891	675.087	1342.26	201.237	744.351	1145.37	-10.825	776.323	1173.39	306.954	685.464	1127.55	159.972	738.653	783.411	-91.9517	471.514	844.49	-36.7921	494	847.455	36.2597	401.414	845.617	13.0197	304.419	821.694	5.12892	775.493	806.809	414.894	509.058	826.306	432.997	514.369	849.846	362.536	426.274	848.959	393.952	320.662	821.319	368.595
234	2.33	628.71	1339.09	139.253	665.02	1327.89	70.3803	675.102	1342.27	201.227	744.329	1145.38	-10.8106	776.167	1173.32	306.883	685.412	1127.52	159.961	738.676	783.433	-91.9434	471.525	844.467	-36.7932	493.982	847.442	36.2889	401.448	845.638	13.0073	304.405	821.718	5.12272	775.504	806.827	414.911	509.053	826.289	433.004	514.389	849.864	362.566	426.271	848.974	393.968	320.643	821.353	368.605
235	2.34	628.676	1339.1	139.264	665.034	1327.89	70.3626	675.123	1342.28	201.204	744.314	1145.38	-10.8183	776.413	1173.42	306.994	685.42	1127.54	159.934	738.737	783.462	-91.9547	471.526	844.443	-36.8068	493.973	847.401	36.3033	401.479	845.656	13.0148	304.407	821.705	5.12494	775.521	806.835	414.909	509.044	826.262	433.003	514.384	849.844	362.562	426.281	848.963	393.976	320.666	821.365	368.609
236	2.35	628.659	1339.11	139.257	665.021	1327.9	70.3527	675.14	1342.28	201.197	744.286	1145.37	-10.8327	776.442	1173.44	307.016	685.329	1127.6	159.963	738.738	783.461	-91.9676	471.488	844.424	-36.7854	493.969	847.382	36.3076	401.482	845.667	13.0191	304.403	821.686	5.12406	775.501	806.832	414.898	509.012	826.241	433.001	514.403	849.815	362.567	426.275	848.94	393.983	320.66	821.369	368.614
237	2.36	628.662	1339.13	139.255	665.03	1327.87	70.3405	675.121	1342.26	201.173	744.243	1145.36	-10.8396	776.46	1173.47	307.017	685.317	1127.64	159.966	738.695	783.424	-91.9785	471.474	844.382	-36.7731	493.99	847.373	36.2936	401.424	845.666	13.035	304.416	821.684	5.12478	775.483	806.818	414.902	508.997	826.238	433.002	514.43	849.817	362.595	426.289	848.925	393.998	320.648	821.36	368.623
238	2.37	628.768	1339.08	139.25	665.081	1327.82	70.325	675.168	1342.23	201.155	744.265	1145.35	-10.8465	776.48	1173.47	307.027	685.456	1127.63	159.977	738.711	783.423	-92.0034	471.516	844.34	-36.7817	494.049	847.342	36.2974	401.428	845.612	13.0416	304.431	821.672	5.12705	775.511	806.841	414.941	509.018	826.257	433.029	514.459	849.815	362.619	426.298	848.903	393.988	320.671	821.327	368.615
239	2.38	628.879	1339.01	139.202	665.153	1327.8	70.2946	675.209	1342.22	201.136	744.253	1145.35	-10.8638	776.501	1173.49	307.021	685.51	1127.65	159.964	738.741	783.436	-92.0378	471.594	844.29	-36.8276	494.115	847.319	36.2709	401.482	845.589	13.0434	304.442	821.668	5.11357	775.514	806.855	414.959	509.074	826.292	433.053	514.48	849.814	362.619	426.309	848.883	393.971	320.692	821.295	368.586
240	2.39	628.893	1339.03	139.154	665.193	1327.79	70.2639	675.196	1342.25	201.112	744.247	1145.36	-10.8978	776.528	1173.52	307.008	685.427	1127.74	159.971	738.718	783.443	-92.0639	471.604	844.275	-36.8455	494.134	847.314	36.2364	401.491	845.585	13.0452	304.462	821.649	5.08228	775.489	806.855	414.963	509.069	826.312	433.045	514.458	849.844	362.607	426.294	848.902	393.966	320.677	821.294	368.556
241	2.4	628.849	1339.07	139.15	665.185	1327.83	70.2414	675.176	1342.29	201.089	744.206	1145.38	-10.9104	776.494	1173.53	307.035	685.274	1127.85	159.991	738.73	783.458	-92.0795	471.603	844.288	-36.8477	494.148	847.324	36.1934	401.457	845.601	13.0272	304.486	821.658	5.06504	775.464	806.868	414.977	509.043	826.325	433.029	514.418	849.892	362.596	426.264	848.94	393.954	320.638	821.345	368.559
242	2.41	628.842	1339.1	139.134	665.201	1327.85	70.2419	675.186	1342.31	201.084	744.179	1145.4	-10.9031	776.489	1173.54	307.054	685.242	1127.92	159.972	738.757	783.503	-92.0928	471.603	844.321	-36.8509	494.17	847.309	36.1758	401.514	845.611	13.0049	304.482	821.665	5.06219	775.473	806.89	414.998	509.044	826.331	433.022	514.401	849.912	362.577	426.259	848.989	393.954	320.617	821.367	368.558
243	2.42	628.802	1339.16	139.159	665.216	1327.86	70.2426	675.215	1342.32	201.09	744.175	1145.41	-10.9176	776.468	1173.52	307.007	685.262	1127.91	159.965	738.777	783.532	-92.1032	471.577	844.335	-36.8411	494.178	847.284	36.1746	401.559	845.615	12.9732	304.459	821.675	5.04941	775.45	806.892	414.994	509.028	826.342	433.025	514.41	849.92	362.581	426.255	849.021	393.969	320.622	821.394	368.559
244	2.43	628.77	1339.2	139.17	665.224	1327.88	70.2348	675.209	1342.33	201.1	744.146	1145.41	-10.9404	776.529	1173.54	306.978	685.202	1127.93	159.968	738.777	783.534	-92.1302	471.566	844.33	-36.8383	494.135	847.279	36.1799	401.522	845.621	12.9911	304.434	821.688	5.04255	775.44	806.897	414.996	509.003	826.332	433.009	514.424	849.915	362.604	426.251	849.012	393.97	320.616	821.418	368.575
245	2.44	628.794	1339.21	139.17	665.244	1327.88	70.2431	675.233	1342.32	201.111	744.142	1145.4	-10.9505	776.38	1173.51	306.901	685.127	1127.97	159.971	738.804	783.552	-92.1607	471.548	844.308	-36.8416	494.114	847.278	36.1776	401.462	845.636	13.0105	304.439	821.666	5.04014	775.485	806.919	415.03	509.008	826.329	433.002	514.402	849.887	362.617	426.249	848.985	393.957	320.6	821.402	368.569
246	2.45	628.863	1339.15	139.184	665.248	1327.86	70.2523	675.254	1342.29	201.123	744.099	1145.38	-10.9481	776.187	1173.48	306.803	685.161	1127.98	159.955	738.783	783.54	-92.1836	471.533	844.277	-36.8497	494.077	847.281	36.1989	401.442	845.62	13.0148	304.421	821.652	5.0527	775.482	806.938	415.061	508.98	826.302	433.01	514.392	849.878	362.623	426.265	848.944	393.954	320.63	821.361	368.577
247	2.46	628.883	1339.12	139.225	665.216	1327.85	70.2712	675.292	1342.25	201.13	744.067	1145.36	-10.9412	776.38	1173.56	306.952	685.199	1127.96	159.945	738.745	783.515	-92.1962	471.521	844.262	-36.8616	494.044	847.281	36.2129	401.398	845.609	13.0551	304.385	821.639	5.07148	775.54	806.984	415.081	509.019	826.281	433.034	514.408	849.848	362.639	426.297	848.902	393.96	320.66	821.309	368.572
248	2.47	628.957	1339.11	139.227	665.218	1327.85	70.274	675.345	1342.25	201.132	744.04	1145.35	-10.944	776.453	1173.61	307.015	685.209	1127.97	159.949	738.739	783.502	-92.2275	471.548	844.252	-36.8505	494.006	847.305	36.2416	401.343	845.617	13.0646	304.406	821.633	5.07689	775.591	807.025	415.094	509.069	826.278	433.037	514.434	849.823	362.631	426.327	848.868	393.957	320.694	821.278	368.577
249	2.48	629.026	1339.1	139.2	665.263	1327.86	70.2561	675.35	1342.25	201.131	743.985	1145.36	-10.9543	776.454	1173.66	307.084	685.183	1127.97	159.975	738.757	783.506	-92.2358	471.563	844.259	-36.8617	494.012	847.331	36.2428	401.348	845.633	13.0475	304.4	821.659	5.08107	775.602	807.055	415.115	509.057	826.292	433.031	514.457	849.818	362.63	426.334	848.878	393.947	320.703	821.273	368.58
250	2.49	628.947	1339.16	139.198	665.22	1327.91	70.2797	675.35	1342.27	201.133	743.911	1145.37	-10.9391	776.436	1173.69	307.113	685.194	1127.99	159.989	738.762	783.545	-92.229	471.515	844.299	-36.8466	494.014	847.343	36.237	401.374	845.644	13.0257	304.391	821.69	5.07747	775.578	807.08	415.149	509.055	826.308	433.011	514.435	849.811	362.614	426.314	848.913	393.961	320.667	821.304	368.583
251	2.5	628.831	1339.27	139.225	665.203	1327.94	70.2945	675.356	1342.33	201.139	743.862	1145.41	-10.9294	776.44	1173.74	307.104	685.188	1128.04	159.977	738.747	783.579	-92.2455	471.486	844.333	-36.8289	493.994	847.375	36.2332	401.43	845.658	13.0153	304.388	821.705	5.07607	775.559	807.115	415.165	509.065	826.322	433.02	514.455	849.833	362.62	426.288	848.955	393.981	320.666	821.348	368.577
252	2.51	628.837	1339.37	139.227	665.171	1327.97	70.2982	675.328	1342.38	201.138	743.801	1145.46	-10.93	776.44	1173.77	307.084	685.152	1128.06	159.948	738.779	783.628	-92.2873	471.48	844.349	-36.8405	493.978	847.392	36.2278	401.438	845.682	12.9956	304.42	821.697	5.06597	775.561	807.151	415.187	509.052	826.325	433.024	514.475	849.888	362.621	426.267	848.985	393.968	320.67	821.375	368.567
253	2.52	628.896	1339.34	139.213	665.185	1327.96	70.2882	675.296	1342.4	201.139	743.752	1145.5	-10.9276	776.405	1173.76	307.067	685.169	1128.09	159.931	738.831	783.695	-92.3016	471.499	844.333	-36.8671	494.018	847.381	36.2121	401.42	845.703	12.9757	304.42	821.703	5.0518	775.57	807.179	415.231	509.041	826.336	433.028	514.451	849.913	362.634	426.272	849	393.944	320.632	821.393	368.551
254	2.53	628.879	1339.27	139.214	665.187	1327.92	70.311	675.286	1342.39	201.157	743.713	1145.52	-10.913	776.402	1173.8	307.141	685.139	1128.16	159.998	738.8	783.734	-92.3099	471.522	844.306	-36.87	494.035	847.369	36.2087	401.404	845.695	12.9854	304.395	821.707	5.0529	775.554	807.166	415.266	509.001	826.34	433.048	514.421	849.938	362.665	426.267	849.005	393.953	320.629	821.386	368.56
255	2.54	628.909	1339.18	139.228	665.173	1327.88	70.3316	675.276	1342.37	201.169	743.667	1145.54	-10.8952	776.383	1173.8	307.194	685.098	1128.2	160.014	738.792	783.77	-92.3474	471.535	844.283	-36.8615	494.015	847.361	36.2113	401.385	845.684	13.0128	304.379	821.705	5.04759	775.518	807.148	415.265	509.016	826.352	433.06	514.423	849.938	362.695	426.282	848.984	393.966	320.627	821.368	368.559
256	2.55	628.917	1339.1	139.23	665.179	1327.84	70.3375	675.241	1342.35	201.173	743.636	1145.55	-10.895	776.42	1173.79	307.201	685.156	1128.18	159.988	738.841	783.809	-92.3791	471.52	844.252	-36.8837	494.048	847.348	36.1901	401.367	845.679	12.9942	304.383	821.697	5.03692	775.503	807.134	415.268	509.071	826.369	433.067	514.416	849.948	362.697	426.288	848.977	393.967	320.632	821.354	368.554
257	2.56	628.881	1339.08	139.276	665.124	1327.82	70.3692	675.197	1342.31	201.193	743.596	1145.55	-10.8866	776.421	1173.76	307.209	685.202	1128.16	159.989	738.821	783.799	-92.3811	471.5	844.231	-36.8854	494.091	847.332	36.1572	401.357	845.686	12.9733	304.391	821.686	5.00855	775.509	807.115	415.272	509.089	826.351	433.084	514.391	849.914	362.676	426.268	848.973	393.962	320.641	821.347	368.551
258	2.57	628.835	1339.07	139.321	665.092	1327.79	70.3981	675.172	1342.27	201.258	743.562	1145.55	-10.875	776.44	1173.73	307.242	685.125	1128.18	160.027	738.808	783.786	-92.4031	471.511	844.217	-36.88	494.11	847.323	36.1341	401.416	845.68	12.9655	304.391	821.706	4.99952	775.514	807.087	415.268	509.071	826.337	433.091	514.363	849.89	362.681	426.271	848.964	393.974	320.653	821.349	368.567
259	2.58	628.851	1339	139.393	665.068	1327.78	70.4602	675.211	1342.25	201.333	743.574	1145.54	-10.8528	776.466	1173.69	307.272	685.124	1128.17	160.068	738.866	783.801	-92.4345	471.527	844.19	-36.8792	494.123	847.282	36.1505	401.483	845.667	12.961	304.393	821.688	5.01844	775.513	807.044	415.234	509.068	826.319	433.095	514.414	849.887	362.722	426.302	848.953	393.985	320.671	821.338	368.597
260	2.59	628.887	1338.96	139.449	665.038	1327.77	70.5187	675.212	1342.23	201.386	743.565	1145.54	-10.8508	776.458	1173.66	307.287	685.178	1128.14	160.094	738.905	783.839	-92.4466	471.55	844.153	-36.8834	494.105	847.249	36.1496	401.491	845.651	12.9749	304.407	821.648	5.03849	775.519	807.005	415.203	509.077	826.304	433.111	514.43	849.853	362.713	426.315	848.953	393.994	320.665	821.346	368.617
261	2.6	628.833	1338.98	139.5	665.007	1327.74	70.5658	675.177	1342.19	201.448	743.521	1145.53	-10.8355	776.448	1173.63	307.315	685.306	1128.08	160.099	738.931	783.859	-92.4687	471.528	844.126	-36.8937	494.107	847.224	36.1457	401.486	845.629	12.9776	304.41	821.638	5.03138	775.506	806.962	415.182	509.048	826.285	433.103	514.442	849.849	362.712	426.288	848.952	393.998	320.665	821.366	368.628
262	2.61	628.77	1338.93	139.551	664.981	1327.73	70.6282	675.19	1342.15	201.511	743.488	1145.53	-10.8159	776.496	1173.64	307.357	685.298	1128.09	160.116	738.939	783.848	-92.4659	471.525	844.098	-36.89	494.12	847.194	36.1399	401.469	845.643	12.9939	304.414	821.638	5.02545	775.521	806.953	415.168	508.991	826.276	433.085	514.446	849.884	362.712	426.286	848.942	393.995	320.657	821.361	368.615
263	2.62	628.771	1338.88	139.608	664.963	1327.74	70.6855	675.208	1342.15	201.565	743.451	1145.54	-10.7972	776.564	1173.65	307.377	685.229	1128.13	160.124	738.923	783.842	-92.489	471.572	844.071	-36.9026	494.145	847.177	36.1332	401.489	845.643	12.9871	304.419	821.66	5.01821	775.54	806.961	415.154	508.999	826.291	433.084	514.456	849.9	362.684	426.298	848.947	393.979	320.666	821.334	368.604
264	2.63	628.78	1338.88	139.647	664.915	1327.73	70.7378	675.2	1342.14	201.601	743.412	1145.56	-10.8027	776.569	1173.63	307.384	685.192	1128.19	160.133	738.937	783.849	-92.5114	471.608	844.057	-36.9426	494.153	847.202	36.1154	401.493	845.649	12.968	304.395	821.68	5.00654	775.532	806.956	415.123	509.017	826.311	433.066	514.456	849.919	362.674	426.297	848.954	393.948	320.663	821.322	368.576
265	2.64	628.808	1338.87	139.67	664.872	1327.74	70.8032	675.218	1342.13	201.665	743.35	1145.58	-10.7956	776.561	1173.6	307.387	685.153	1128.23	160.15	738.935	783.85	-92.5209	471.61	844.026	-36.9603	494.179	847.197	36.0922	401.477	845.653	12.9482	304.397	821.7	4.98208	775.548	806.951	415.117	509.059	826.325	433.067	514.469	849.919	362.672	426.291	848.969	393.934	320.631	821.34	368.551
266	2.65	628.829	1338.83	139.717	664.879	1327.76	70.8503	675.249	1342.12	201.731	743.314	1145.58	-10.7742	776.594	1173.6	307.423	685.119	1128.27	160.174	738.992	783.887	-92.5277	471.604	844.015	-36.9709	494.196	847.178	36.0661	401.444	845.655	12.9455	304.408	821.713	4.97105	775.599	806.947	415.134	509.097	826.319	433.066	514.501	849.913	362.683	426.322	848.978	393.939	320.638	821.359	368.546
267	2.66	628.789	1338.86	139.834	664.87	1327.78	70.9241	675.267	1342.1	201.797	743.276	1145.59	-10.7538	776.66	1173.6	307.458	685.145	1128.27	160.164	739.124	783.939	-92.5355	471.622	844.005	-36.9904	494.245	847.15	36.0459	401.494	845.663	12.9088	304.417	821.717	4.96921	775.61	806.935	415.146	509.091	826.303	433.057	514.516	849.885	362.683	426.341	848.978	393.938	320.675	821.367	368.545
268	2.67	628.592	1338.93	139.982	664.814	1327.8	71.0217	675.278	1342.1	201.883	743.21	1145.59	-10.7328	776.691	1173.58	307.491	685.208	1128.27	160.167	739.184	783.953	-92.56	471.622	843.993	-37.0068	494.207	847.115	36.0529	401.51	845.704	12.9109	304.402	821.724	4.96453	775.592	806.901	415.13	509.056	826.264	433.051	514.556	849.858	362.684	426.341	848.991	393.958	320.682	821.379	368.561
269	2.68	628.434	1338.98	140.109	664.734	1327.83	71.1179	675.319	1342.1	201.969	743.128	1145.58	-10.6914	776.658	1173.54	307.536	685.183	1128.31	160.21	739.179	783.956	-92.5947	471.615	843.983	-36.9894	494.172	847.083	36.0745	401.481	845.722	12.9476	304.379	821.734	4.96175	775.599	806.878	415.119	509.053	826.244	433.058	514.564	849.851	362.69	426.32	848.999	393.981	320.663	821.389	368.586
270	2.69	628.472	1338.98	140.216	664.674	1327.83	71.2205	675.354	1342.11	202.049	743.076	1145.59	-10.6569	776.669	1173.54	307.584	685.217	1128.3	160.248	739.231	783.993	-92.6243	471.619	843.953	-36.9853	494.178	847.055	36.0749	401.529	845.73	12.9347	304.391	821.73	4.97728	775.571	806.855	415.123	509.071	826.246	433.082	514.589	849.847	362.732	426.346	848.987	394.006	320.697	821.392	368.603
271	2.7	628.359	1338.99	140.341	664.67	1327.81	71.3255	675.361	1342.09	202.14	743.02	1145.59	-10.6219	776.684	1173.5	307.628	685.309	1128.27	160.269	739.232	783.998	-92.654	471.628	843.9	-36.9817	494.181	847.012	36.0832	401.562	845.709	12.9131	304.404	821.71	4.99665	775.537	806.838	415.136	509.082	826.244	433.104	514.571	849.834	362.75	426.344	848.961	394.023	320.714	821.372	368.615
272	2.71	628.272	1338.96	140.432	664.666	1327.79	71.4018	675.323	1342.06	202.191	742.931	1145.58	-10.6102	776.653	1173.51	307.672	685.361	1128.22	160.267	739.188	783.978	-92.7005	471.639	843.823	-36.998	494.176	846.983	36.0777	401.576	845.667	12.9053	304.413	821.672	4.99405	775.525	806.823	415.134	509.03	826.238	433.1	514.524	849.835	362.759	426.323	848.934	394.02	320.68	821.34	368.608
273	2.72	628.366	1338.88	140.451	664.665	1327.77	71.4501	675.285	1342.06	202.208	742.858	1145.58	-10.6034	776.575	1173.51	307.691	685.285	1128.27	160.283	739.19	783.998	-92.7646	471.664	843.743	-37.0325	494.167	846.949	36.0563	401.565	845.624	12.9125	304.427	821.651	4.96099	775.501	806.804	415.133	508.979	826.246	433.087	514.465	849.833	362.76	426.308	848.923	393.986	320.668	821.317	368.585
274	2.73	628.451	1338.84	140.479	664.68	1327.77	71.4975	675.288	1342.05	202.238	742.786	1145.58	-10.5871	776.545	1173.52	307.734	685.226	1128.3	160.291	739.185	783.983	-92.8162	471.728	843.684	-37.0776	494.205	846.889	36.0149	401.564	845.603	12.8954	304.468	821.633	4.9268	775.453	806.797	415.138	508.967	826.252	433.089	514.453	849.832	362.745	426.314	848.917	393.954	320.661	821.302	368.561
275	2.74	628.351	1338.85	140.574	664.661	1327.78	71.5655	675.27	1342.07	202.292	742.707	1145.58	-10.5616	776.511	1173.51	307.767	685.119	1128.29	160.306	739.182	783.97	-92.8226	471.745	843.634	-37.0906	494.292	846.85	35.972	401.592	845.577	12.875	304.447	821.649	4.91669	775.439	806.781	415.141	508.936	826.249	433.085	514.419	849.87	362.736	426.289	848.936	393.953	320.614	821.31	368.544
276	2.75	628.136	1338.98	140.685	664.575	1327.82	71.6656	675.243	1342.11	202.367	742.635	1145.58	-10.5327	776.491	1173.51	307.78	685.098	1128.31	160.319	739.231	783.987	-92.8146	471.729	843.603	-37.0848	494.307	846.797	35.9555	401.575	845.575	12.8815	304.43	821.657	4.92059	775.463	806.76	415.152	508.915	826.253	433.078	514.392	849.879	362.72	426.257	848.981	393.961	320.593	821.355	368.551
277	2.76	627.974	1339.1	140.77	664.427	1327.89	71.7907	675.231	1342.11	202.439	742.553	1145.57	-10.5146	776.474	1173.49	307.821	685.155	1128.29	160.321	739.29	783.981	-92.8029	471.728	843.585	-37.0823	494.294	846.756	35.9565	401.61	845.605	12.8643	304.418	821.689	4.92381	775.457	806.745	415.131	508.945	826.245	433.08	514.372	849.837	362.707	426.253	849.014	393.98	320.587	821.405	368.58
278	2.77	627.724	1339.19	140.902	664.362	1327.93	71.8855	675.182	1342.07	202.489	742.51	1145.57	-10.4778	776.451	1173.45	307.872	685.091	1128.28	160.374	739.367	783.965	-92.7811	471.769	843.527	-37.0845	494.3	846.718	35.9505	401.63	845.65	12.8587	304.408	821.713	4.91685	775.463	806.723	415.144	508.964	826.228	433.086	514.395	849.791	362.719	426.265	849.027	394.002	320.617	821.413	368.603
279	2.78	627.711	1339.19	140.986	664.302	1327.93	71.983	675.17	1342.06	202.553	742.486	1145.56	-10.4367	776.425	1173.42	307.903	685.096	1128.3	160.403	739.465	783.956	-92.7551	471.851	843.454	-37.0881	494.316	846.687	35.9523	401.659	845.639	12.8563	304.409	821.736	4.91879	775.486	806.719	415.168	508.993	826.214	433.104	514.477	849.793	362.726	426.296	849.012	394.004	320.645	821.402	368.618
280	2.79	627.692	1339.09	141.066	664.265	1327.93	72.0549	675.165	1342.03	202.614	742.455	1145.55	-10.4233	776.432	1173.42	307.936	685.107	1128.33	160.416	739.528	783.943	-92.7287	471.892	843.361	-37.103	494.325	846.649	35.9586	401.699	845.595	12.8409	304.432	821.743	4.92003	775.505	806.698	415.174	509.002	826.211	433.111	514.54	849.81	362.749	426.342	848.987	394	320.693	821.369	368.613
281	2.8	627.667	1338.98	141.125	664.264	1327.9	72.0877	675.149	1342	202.647	742.423	1145.54	-10.4145	776.411	1173.4	307.981	685.055	1128.35	160.448	739.563	783.925	-92.7247	471.924	843.264	-37.1349	494.323	846.598	35.9562	401.702	845.58	12.8405	304.437	821.737	4.90409	775.547	806.685	415.192	509.034	826.207	433.108	514.557	849.817	362.76	426.373	848.956	393.984	320.723	821.323	368.587
282	2.81	627.674	1338.91	141.151	664.213	1327.86	72.142	675.065	1341.95	202.678	742.376	1145.54	-10.3973	776.403	1173.39	308.014	685.054	1128.33	160.486	739.578	783.899	-92.6999	471.96	843.174	-37.1448	494.359	846.554	35.9472	401.698	845.56	12.8355	304.432	821.726	4.8916	775.571	806.698	415.22	509.021	826.184	433.093	514.549	849.81	362.76	426.369	848.941	393.971	320.739	821.286	368.583
283	2.82	627.556	1338.89	141.227	664.071	1327.83	72.2394	674.958	1341.91	202.721	742.328	1145.53	-10.3827	776.368	1173.39	308.037	684.962	1128.32	160.527	739.602	783.887	-92.6575	471.956	843.107	-37.1322	494.349	846.504	35.9539	401.7	845.571	12.8152	304.409	821.739	4.87001	775.598	806.716	415.238	508.984	826.167	433.071	514.506	849.794	362.748	426.34	848.94	393.956	320.687	821.312	368.573
284	2.83	627.454	1338.84	141.313	663.955	1327.83	72.3375	674.893	1341.88	202.776	742.275	1145.52	-10.3724	776.346	1173.37	308.074	684.938	1128.34	160.542	739.599	783.869	-92.6305	471.964	843.065	-37.1149	494.305	846.466	35.9817	401.722	845.557	12.8054	304.398	821.751	4.88266	775.617	806.716	415.238	508.971	826.161	433.06	514.498	849.769	362.779	426.319	848.945	393.961	320.654	821.335	368.57
285	2.84	627.355	1338.81	141.412	663.865	1327.81	72.4177	674.824	1341.86	202.855	742.218	1145.52	-10.3513	776.297	1173.36	308.098	684.975	1128.3	160.576	739.628	783.855	-92.6144	471.985	843.011	-37.0942	494.309	846.411	35.9761	401.723	845.556	12.8107	304.394	821.741	4.91164	775.619	806.712	415.252	508.962	826.16	433.093	514.487	849.753	362.791	426.317	848.955	393.982	320.671	821.34	368.591
286	2.85	627.208	1338.83	141.493	663.769	1327.78	72.4905	674.77	1341.82	202.929	742.181	1145.52	-10.3275	776.265	1173.35	308.146	684.908	1128.29	160.621	739.665	783.827	-92.5896	472.011	842.934	-37.0965	494.322	846.345	35.9805	401.731	845.532	12.8081	304.428	821.721	4.90974	775.593	806.696	415.272	508.96	826.159	433.106	514.507	849.75	362.842	426.305	848.965	394.005	320.662	821.356	368.618
287	2.86	627.24	1338.76	141.495	663.696	1327.75	72.5483	674.693	1341.79	202.988	742.136	1145.5	-10.3235	776.238	1173.36	308.176	684.814	1128.32	160.629	739.71	783.798	-92.5832	472.055	842.861	-37.1121	494.34	846.307	35.9639	401.792	845.511	12.7811	304.453	821.729	4.8908	775.583	806.689	415.281	508.953	826.159	433.112	514.514	849.755	362.864	426.315	848.968	393.997	320.652	821.35	368.603
288	2.87	627.205	1338.73	141.52	663.644	1327.74	72.5618	674.593	1341.77	203.023	742.101	1145.47	-10.3173	776.22	1173.35	308.184	684.7	1128.37	160.63	739.752	783.781	-92.6006	472.093	842.808	-37.1406	494.403	846.278	35.9019	401.844	845.517	12.7441	304.458	821.75	4.86278	775.565	806.659	415.267	508.951	826.178	433.114	514.516	849.762	362.845	426.336	848.983	393.979	320.669	821.362	368.585
289	2.88	627.121	1338.75	141.548	663.557	1327.75	72.5838	674.511	1341.76	203.056	742.05	1145.46	-10.3157	776.192	1173.35	308.205	684.605	1128.39	160.637	739.814	783.787	-92.5758	472.129	842.769	-37.1667	494.457	846.257	35.8437	401.833	845.555	12.744	304.464	821.771	4.84035	775.528	806.612	415.262	508.977	826.191	433.108	514.542	849.784	362.815	426.33	849.013	393.973	320.631	821.393	368.575
290	2.89	627.045	1338.74	141.575	663.452	1327.74	72.6213	674.44	1341.73	203.114	742.005	1145.45	-10.3026	776.197	1173.35	308.216	684.513	1128.43	160.667	739.877	783.766	-92.5759	472.112	842.719	-37.1632	494.489	846.23	35.8256	401.824	845.564	12.7459	304.457	821.791	4.81427	775.534	806.602	415.287	508.998	826.211	433.097	514.53	849.792	362.781	426.319	849.031	393.979	320.638	821.399	368.582
291	2.9	627	1338.68	141.614	663.383	1327.69	72.6513	674.376	1341.7	203.159	741.931	1145.43	-10.2813	776.145	1173.34	308.239	684.448	1128.42	160.745	739.903	783.744	-92.5969	472.099	842.637	-37.1863	494.463	846.153	35.8439	401.844	845.528	12.7096	304.449	821.777	4.79924	775.545	806.587	415.288	509.011	826.206	433.099	514.525	849.767	362.788	426.333	849.021	393.979	320.658	821.382	368.588
292	2.91	627.046	1338.57	141.64	663.339	1327.64	72.6593	674.333	1341.67	203.176	741.851	1145.43	-10.283	776.075	1173.3	308.276	684.374	1128.42	160.805	739.923	783.736	-92.6169	472.175	842.499	-37.2095	494.441	846.062	35.8357	401.868	845.478	12.6872	304.461	821.757	4.78944	775.514	806.566	415.281	509.005	826.19	433.102	514.508	849.737	362.81	426.353	848.977	393.979	320.69	821.34	368.577
293	2.92	627.132	1338.45	141.664	663.305	1327.56	72.6809	674.251	1341.64	203.197	741.769	1145.43	-10.267	776.006	1173.27	308.308	684.465	1128.37	160.764	739.954	783.729	-92.6367	472.237	842.328	-37.2321	494.426	845.945	35.8401	401.924	845.433	12.6768	304.512	821.713	4.78592	775.495	806.55	415.281	508.955	826.148	433.103	514.461	849.698	362.817	426.359	848.929	393.977	320.674	821.304	368.578
294	2.93	627.084	1338.4	141.73	663.237	1327.52	72.728	674.186	1341.62	203.251	741.669	1145.42	-10.2483	775.987	1173.26	308.313	684.558	1128.26	160.767	739.981	783.715	-92.661	472.3	842.193	-37.2468	494.391	845.835	35.8595	401.984	845.413	12.6604	304.547	821.677	4.76795	775.526	806.572	415.315	508.9	826.114	433.103	514.416	849.69	362.846	426.342	848.902	393.976	320.667	821.292	368.578
295	2.94	627.032	1338.41	141.81	663.138	1327.53	72.7763	674.14	1341.62	203.316	741.572	1145.42	-10.2327	775.916	1173.25	308.322	684.507	1128.24	160.856	740.048	783.736	-92.6931	472.356	842.098	-37.2412	494.4	845.766	35.8762	402.038	845.405	12.6455	304.514	821.714	4.79694	775.544	806.578	415.338	508.897	826.112	433.136	514.416	849.693	362.894	426.335	848.921	393.989	320.692	821.312	368.592
296	2.95	626.89	1338.48	141.901	663.006	1327.55	72.8408	674.051	1341.6	203.367	741.464	1145.43	-10.2236	775.848	1173.25	308.351	684.388	1128.3	160.899	740.08	783.746	-92.7091	472.385	842.022	-37.2466	494.446	845.681	35.869	402.03	845.428	12.664	304.479	821.753	4.82261	775.547	806.564	415.322	508.929	826.125	433.153	514.451	849.724	362.879	426.325	848.975	394.021	320.666	821.356	368.62
297	2.96	626.748	1338.51	141.946	662.864	1327.59	72.8968	673.891	1341.59	203.42	741.373	1145.46	-10.2239	775.865	1173.28	308.37	684.133	1128.4	160.914	740.121	783.74	-92.7181	472.387	841.953	-37.2478	494.473	845.621	35.8575	402.007	845.451	12.6498	304.449	821.811	4.81427	775.577	806.566	415.32	508.962	826.134	433.139	514.603	849.675	362.802	426.313	849.015	394.019	320.637	821.411	368.63
298	2.97	626.663	1338.52	141.94	662.746	1327.62	72.9266	673.789	1341.57	203.47	741.295	1145.46	-10.2271	775.859	1173.26	308.353	684.098	1128.4	160.878	740.216	783.732	-92.7317	472.44	841.829	-37.2706	494.506	845.519	35.8022	402.037	845.452	12.5932	304.454	821.858	4.76928	775.601	806.567	415.31	508.984	826.142	433.116	514.795	849.597	362.719	426.331	849.033	393.987	320.647	821.418	368.59
299	2.98	626.561	1338.47	141.966	662.669	1327.61	72.9376	673.747	1341.53	203.491	741.229	1145.43	-10.2437	775.794	1173.23	308.355	684.032	1128.42	160.891	740.34	783.715	-92.7332	472.527	841.689	-37.313	494.532	845.421	35.7672	402.095	845.434	12.5175	304.468	821.865	4.71408	775.604	806.522	415.295	508.977	826.135	433.094	514.643	849.68	362.799	426.368	849.01	393.957	320.65	821.39	368.565
300	2.99	626.45	1338.39	142.032	662.556	1327.6	72.9764	673.641	1341.46	203.539	741.127	1145.4	-10.2615	775.763	1173.2	308.328	683.773	1128.45	160.975	740.395	783.67	-92.7558	472.576	841.554	-37.3441	494.506	845.327	35.7874	402.136	845.42	12.4824	304.48	821.864	4.68902	775.595	806.498	415.275	508.968	826.119	433.082	514.574	849.684	362.817	426.373	848.978	393.947	320.671	821.35	368.553
301	3	626.382	1338.32	142.099	662.422	1327.56	73.0287	673.519	1341.41	203.613	741.035	1145.38	-10.2644	775.752	1173.17	308.322	683.771	1128.4	161.016	740.458	783.629	-92.7429	472.618	841.417	-37.3689	494.544	845.213	35.7895	402.11	845.392	12.5022	304.514	821.847	4.68647	775.612	806.484	415.249	508.953	826.098	433.085	514.535	849.648	362.799	426.378	848.962	393.956	320.7	821.331	368.561
302	3.01	626.379	1338.21	142.166	662.321	1327.49	73.0753	673.43	1341.35	203.685	740.954	1145.34	-10.2583	775.682	1173.13	308.33	683.761	1128.33	161.065	740.509	783.58	-92.74	472.668	841.28	-37.3884	494.605	845.107	35.7691	402.171	845.349	12.4911	304.541	821.82	4.67898	775.624	806.463	415.235	508.972	826.081	433.08	514.554	849.621	362.794	426.402	848.934	393.96	320.736	821.303	368.592
303	3.02	626.391	1338.04	142.222	662.239	1327.44	73.1158	673.314	1341.29	203.755	740.877	1145.31	-10.2622	775.618	1173.1	308.306	683.841	1128.22	161.079	740.576	783.524	-92.7475	472.707	841.142	-37.3982	494.656	844.983	35.7642	402.259	845.305	12.455	304.551	821.798	4.66256	775.628	806.455	415.216	508.949	826.058	433.078	514.572	849.603	362.815	426.409	848.92	393.967	320.748	821.299	368.603
304	3.03	626.277	1337.98	142.279	662.139	1327.4	73.1362	673.184	1341.24	203.824	740.782	1145.28	-10.274	775.611	1173.12	308.36	683.833	1128.13	161.043	740.607	783.478	-92.7274	472.772	840.999	-37.3989	494.7	844.88	35.7636	402.308	845.284	12.4233	304.542	821.802	4.65599	775.641	806.453	415.21	508.921	826.059	433.087	514.555	849.593	362.838	426.398	848.92	393.966	320.72	821.303	368.597
305	3.04	626.205	1337.93	142.309	662.05	1327.35	73.1467	673.054	1341.2	203.865	740.681	1145.27	-10.2847	775.591	1173.14	308.346	683.715	1128.17	161.046	740.651	783.452	-92.7028	472.833	840.874	-37.4141	494.743	844.81	35.7456	402.383	845.275	12.3838	304.588	821.784	4.64169	775.612	806.444	415.206	508.932	826.081	433.097	514.532	849.634	362.819	426.372	848.929	393.951	320.672	821.312	368.6
306	3.05	626.109	1337.86	142.345	661.945	1327.31	73.1684	672.95	1341.17	203.906	740.634	1145.27	-10.3038	775.527	1173.13	308.304	683.727	1128.17	161.051	740.722	783.416	-92.6821	472.922	840.775	-37.4547	494.827	844.74	35.7149	402.422	845.257	12.365	304.605	821.797	4.63093	775.547	806.423	415.186	508.923	826.106	433.092	514.569	849.669	362.798	426.39	848.94	393.95	320.679	821.328	368.594
307	3.06	626.026	1337.82	142.385	661.801	1327.28	73.1776	672.782	1341.13	203.942	740.559	1145.24	-10.3228	775.514	1173.1	308.245	683.659	1128.16	161.087	740.768	783.376	-92.6532	472.973	840.707	-37.4742	494.908	844.679	35.6654	402.417	845.228	12.3349	304.608	821.807	4.61834	775.502	806.4	415.16	508.92	826.113	433.076	514.497	849.661	362.773	426.362	848.973	393.962	320.681	821.371	368.59
308	3.07	625.888	1337.83	142.412	661.615	1327.25	73.2234	672.65	1341.09	203.971	740.489	1145.22	-10.3109	775.494	1173.09	308.238	683.579	1128.14	161.099	740.829	783.361	-92.6011	472.956	840.654	-37.4574	494.95	844.628	35.6237	402.397	845.218	12.2989	304.604	821.806	4.5969	775.513	806.377	415.149	508.948	826.108	433.067	514.461	849.64	362.774	426.317	848.999	393.982	320.671	821.394	368.617
309	3.08	625.774	1337.83	142.442	661.485	1327.22	73.254	672.6	1341.06	204	740.427	1145.18	-10.3147	775.473	1173.09	308.288	683.609	1128.09	161.045	740.883	783.328	-92.5547	472.975	840.584	-37.456	494.985	844.601	35.611	402.467	845.198	12.2687	304.622	821.8	4.58357	775.539	806.383	415.154	508.934	826.085	433.05	514.463	849.604	362.769	426.306	849.01	393.988	320.663	821.415	368.63
310	3.09	625.782	1337.73	142.442	661.42	1327.17	73.2594	672.576	1341.03	204.01	740.377	1145.15	-10.3072	775.481	1173.1	308.318	683.724	1128.06	161.03	740.898	783.265	-92.5511	472.995	840.517	-37.4563	494.986	844.566	35.635	402.507	845.17	12.2736	304.624	821.816	4.59099	775.581	806.394	415.152	508.939	826.076	433.04	514.507	849.607	362.792	426.339	848.994	393.99	320.682	821.396	368.625
311	3.1	625.759	1337.61	142.447	661.335	1327.1	73.2426	672.528	1340.96	204.005	740.355	1145.1	-10.3228	775.463	1173.1	308.302	683.541	1128.08	161.073	740.909	783.206	-92.5702	473.014	840.418	-37.4609	495.022	844.514	35.6564	402.467	845.171	12.2873	304.604	821.802	4.57946	775.568	806.384	415.155	508.949	826.072	433.059	514.536	849.61	362.823	426.351	848.964	393.981	320.68	821.345	368.611
312	3.11	625.706	1337.53	142.417	661.302	1327.02	73.1945	672.444	1340.91	203.994	740.318	1145.07	-10.3417	775.435	1173.11	308.312	683.311	1128.16	161.139	740.922	783.161	-92.5706	473.056	840.337	-37.4907	495.038	844.506	35.6486	402.443	845.17	12.2923	304.627	821.787	4.53467	775.564	806.398	415.162	508.946	826.091	433.072	514.607	849.62	362.86	426.373	848.925	393.959	320.695	821.277	368.58
313	3.12	625.666	1337.48	142.35	661.245	1326.98	73.1582	672.368	1340.89	203.972	740.253	1145.03	-10.3582	775.399	1173.12	308.315	683.27	1128.21	161.138	740.976	783.128	-92.5724	473.111	840.285	-37.528	495.021	844.501	35.6549	402.506	845.147	12.2318	304.648	821.799	4.50364	775.591	806.42	415.175	508.946	826.105	433.077	514.617	849.647	362.852	426.39	848.91	393.934	320.689	821.258	368.553
314	3.13	625.613	1337.49	142.331	661.155	1326.97	73.1623	672.307	1340.89	203.953	740.189	1145.02	-10.3645	775.352	1173.13	308.303	683.411	1128.19	161.102	741.047	783.12	-92.5617	473.088	840.24	-37.5162	495.026	844.488	35.6358	402.495	845.165	12.2324	304.638	821.829	4.49492	775.597	806.457	415.197	508.966	826.119	433.082	514.547	849.654	362.81	426.367	848.937	393.934	320.665	821.297	368.562
315	3.14	625.519	1337.5	142.308	661.033	1327.01	73.187	672.257	1340.91	203.935	740.136	1145.03	-10.3602	775.314	1173.16	308.288	683.4	1128.15	161.093	741.086	783.128	-92.511	473.051	840.211	-37.4942	495.02	844.457	35.6332	402.416	845.198	12.2549	304.583	821.857	4.51996	775.597	806.483	415.217	508.959	826.109	433.069	514.514	849.647	362.8	426.336	848.964	393.957	320.639	821.354	368.581
316	3.15	625.462	1337.55	142.315	660.986	1327.04	73.187	672.224	1340.94	203.931	740.097	1145.04	-10.3498	775.285	1173.2	308.288	683.159	1128.13	161.115	741.115	783.124	-92.4425	473.054	840.186	-37.4817	495.041	844.407	35.6437	402.479	845.167	12.2273	304.528	821.88	4.562	775.632	806.515	415.235	508.926	826.093	433.074	514.531	849.638	362.809	426.345	849.001	393.971	320.665	821.401	368.616
317	3.16	625.398	1337.55	142.318	660.953	1327.06	73.1983	672.171	1340.93	203.96	740.049	1145.01	-10.3397	775.238	1173.2	308.29	683.129	1128.05	161.14	741.159	783.102	-92.4325	473.068	840.129	-37.4668	495.061	844.349	35.6489	402.538	845.159	12.232	304.483	821.892	4.58935	775.642	806.532	415.253	508.906	826.072	433.083	514.547	849.624	362.842	426.349	849.015	393.977	320.677	821.418	368.649
318	3.17	625.434	1337.51	142.304	660.922	1327.04	73.1982	672.15	1340.91	203.968	739.996	1144.97	-10.3545	775.195	1173.19	308.264	683.185	1127.96	161.11	741.183	783.06	-92.4261	473.073	840.061	-37.4558	495.063	844.291	35.6667	402.54	845.151	12.2541	304.503	821.861	4.60688	775.606	806.535	415.259	508.923	826.056	433.09	514.562	849.618	362.863	426.365	848.996	393.986	320.682	821.392	368.657
319	3.18	625.39	1337.44	142.276	660.915	1327	73.1646	672.124	1340.86	203.938	739.97	1144.91	-10.3912	775.187	1173.16	308.192	683.129	1127.92	161.15	741.19	782.991	-92.4352	473.101	839.979	-37.485	495.105	844.249	35.6567	402.643	845.127	12.1931	304.561	821.817	4.57066	775.613	806.544	415.272	508.915	826.054	433.086	514.576	849.601	362.844	426.394	848.971	393.967	320.711	821.349	368.636
320	3.19	625.341	1337.42	142.247	660.927	1326.95	73.1184	672.102	1340.84	203.904	739.947	1144.85	-10.4405	775.155	1173.16	308.18	683.16	1127.95	161.138	741.22	782.92	-92.4445	473.136	839.911	-37.5151	495.142	844.223	35.6239	402.736	845.123	12.1404	304.597	821.8	4.50771	775.619	806.56	415.276	508.895	826.063	433.08	514.545	849.576	362.826	426.445	848.932	393.93	320.733	821.301	368.591
321	3.2	625.284	1337.43	142.229	660.909	1326.94	73.1043	672.075	1340.84	203.895	739.919	1144.8	-10.4713	775.082	1173.18	308.201	683.044	1128.05	161.095	741.264	782.865	-92.4156	473.151	839.851	-37.5172	495.185	844.189	35.5963	402.724	845.098	12.1157	304.619	821.798	4.4752	775.626	806.566	415.305	508.9	826.073	433.083	514.535	849.58	362.819	426.43	848.924	393.912	320.74	821.281	368.586
322	3.21	625.186	1337.43	142.212	660.829	1326.96	73.1028	672.026	1340.82	203.892	739.886	1144.77	-10.4936	775.096	1173.2	308.203	682.903	1128.14	161.101	741.294	782.794	-92.3845	473.193	839.788	-37.5287	495.245	844.146	35.5599	402.647	845.085	12.1276	304.649	821.798	4.44373	775.634	806.564	415.316	508.963	826.089	433.073	514.545	849.597	362.801	426.395	848.95	393.904	320.731	821.284	368.569
323	3.22	625.096	1337.44	142.191	660.74	1326.97	73.0901	671.983	1340.82	203.863	739.865	1144.74	-10.5162	775.078	1173.2	308.178	682.951	1128.14	160.991	741.365	782.751	-92.3652	473.226	839.729	-37.5526	495.333	844.088	35.5096	402.758	845.099	12.0529	304.673	821.812	4.40704	775.635	806.557	415.302	509.002	826.114	433.069	514.525	849.617	362.78	426.385	848.966	393.894	320.693	821.305	368.551
324	3.23	625.054	1337.46	142.182	660.699	1326.98	73.0759	671.93	1340.83	203.859	739.84	1144.72	-10.5276	775.071	1173.18	308.165	683.009	1128.07	160.959	741.434	782.735	-92.3338	473.263	839.656	-37.5674	495.387	844.03	35.4736	402.833	845.094	12	304.633	821.82	4.41844	775.599	806.526	415.301	508.99	826.104	433.087	514.489	849.594	362.787	426.372	848.988	393.896	320.662	821.341	368.556
325	3.24	624.978	1337.46	142.203	660.661	1326.98	73.094	671.875	1340.84	203.88	739.796	1144.7	-10.5243	775.06	1173.17	308.169	682.981	1128.01	160.985	741.483	782.712	-92.2933	473.24	839.598	-37.5396	495.368	843.967	35.5012	402.829	845.104	11.9947	304.597	821.824	4.44799	775.587	806.506	415.287	508.956	826.084	433.091	514.466	849.567	362.806	426.356	849.011	393.924	320.652	821.385	368.597
326	3.25	624.906	1337.42	142.211	660.62	1326.96	73.1015	671.825	1340.82	203.889	739.783	1144.67	-10.5237	775.024	1173.15	308.179	683.028	1127.92	161.009	741.558	782.699	-92.244	473.244	839.504	-37.5217	495.389	843.889	35.5323	402.896	845.085	11.9899	304.551	821.842	4.47995	775.576	806.488	415.259	508.966	826.085	433.075	514.506	849.56	362.83	426.372	849.017	393.952	320.672	821.401	368.625
327	3.26	624.852	1337.4	142.21	660.56	1326.92	73.1053	671.807	1340.81	203.856	739.788	1144.63	-10.5425	774.991	1173.14	308.169	682.905	1127.87	161.035	741.614	782.662	-92.221	473.299	839.405	-37.5434	495.447	843.784	35.5358	403.035	845.071	11.8984	304.597	821.826	4.47157	775.579	806.47	415.229	508.972	826.078	433.087	514.509	849.544	362.839	426.383	849.008	393.945	320.685	821.38	368.615
328	3.27	624.841	1337.37	142.178	660.522	1326.9	73.0884	671.779	1340.81	203.835	739.766	1144.58	-10.5563	774.962	1173.13	308.156	682.643	1127.93	161.131	741.661	782.598	-92.2032	473.342	839.289	-37.5478	495.486	843.737	35.5338	403.087	845.069	11.8688	304.637	821.804	4.45582	775.615	806.481	415.202	508.935	826.074	433.095	514.533	849.563	362.815	426.393	848.997	393.933	320.687	821.368	368.603
329	3.28	624.794	1337.32	142.171	660.514	1326.87	73.0684	671.716	1340.79	203.817	739.735	1144.54	-10.5662	774.943	1173.14	308.158	682.757	1127.87	161.065	741.749	782.571	-92.1265	473.365	839.172	-37.5491	495.514	843.69	35.5235	403.067	845.047	11.8813	304.666	821.8	4.44465	775.651	806.497	415.194	508.935	826.054	433.076	514.538	849.565	362.8	426.381	848.98	393.933	320.685	821.354	368.606
330	3.29	624.78	1337.28	142.15	660.505	1326.84	73.0454	671.649	1340.77	203.779	739.742	1144.51	-10.5842	774.968	1173.15	308.148	682.997	1127.76	160.948	741.834	782.522	-92.12	473.413	839.093	-37.5842	495.529	843.646	35.4853	403.19	844.993	11.8237	304.678	821.798	4.41563	775.658	806.479	415.181	508.955	826.035	433.065	514.526	849.552	362.796	426.385	848.958	393.916	320.692	821.34	368.587
331	3.3	624.755	1337.25	142.068	660.496	1326.81	73.0124	671.583	1340.74	203.697	739.745	1144.47	-10.6093	774.978	1173.15	308.131	683.03	1127.71	160.875	741.906	782.496	-92.1364	473.457	839.004	-37.6403	495.576	843.604	35.4266	403.29	844.985	11.7483	304.708	821.786	4.35261	775.665	806.479	415.146	508.952	826.042	433.039	514.488	849.542	362.78	426.411	848.942	393.902	320.686	821.316	368.563
332	3.31	624.662	1337.27	142.047	660.443	1326.8	72.9908	671.508	1340.72	203.67	739.723	1144.43	-10.6346	774.95	1173.15	308.119	682.979	1127.69	160.873	741.934	782.457	-92.1195	473.48	838.939	-37.6541	495.603	843.569	35.404	403.279	845.017	11.718	304.701	821.801	4.32966	775.676	806.49	415.139	508.946	826.051	433.03	514.511	849.531	362.778	426.423	848.946	393.908	320.708	821.303	368.564
333	3.32	624.534	1337.28	142.055	660.39	1326.82	72.9942	671.488	1340.72	203.687	739.724	1144.4	-10.6347	774.936	1173.15	308.12	682.731	1127.72	160.966	741.98	782.419	-92.0601	473.483	838.897	-37.6562	495.591	843.531	35.4269	403.309	845.044	11.6849	304.634	821.834	4.35844	775.696	806.503	415.149	508.934	826.048	433.046	514.565	849.541	362.787	426.419	848.961	393.933	320.71	821.333	368.59
334	3.33	624.491	1337.27	142.031	660.364	1326.83	72.9968	671.481	1340.72	203.683	739.737	1144.38	-10.6332	774.917	1173.16	308.097	682.685	1127.67	161.014	742.05	782.383	-92.0147	473.522	838.868	-37.6531	495.589	843.493	35.4207	403.422	845.057	11.6099	304.634	821.847	4.35247	775.674	806.5	415.137	508.918	826.046	433.054	514.578	849.536	362.789	426.44	848.975	393.956	320.722	821.352	368.617
335	3.34	624.418	1337.27	142.017	660.354	1326.83	72.9801	671.414	1340.73	203.638	739.722	1144.35	-10.648	774.888	1173.15	308.073	682.748	1127.65	160.959	742.105	782.373	-91.9943	473.538	838.82	-37.6639	495.653	843.475	35.367	403.489	845.061	11.5689	304.644	821.866	4.32535	775.681	806.514	415.151	508.922	826.039	433.033	514.59	849.542	362.785	426.423	848.984	393.949	320.725	821.373	368.625
336	3.35	624.386	1337.27	141.972	660.303	1326.82	72.9673	671.369	1340.73	203.617	739.681	1144.29	-10.6627	774.869	1173.14	308.053	682.735	1127.61	160.871	742.146	782.328	-91.96	473.528	838.766	-37.679	495.662	843.467	35.3471	403.539	845.055	11.5434	304.655	821.86	4.29633	775.69	806.507	415.173	508.943	826.035	433.037	514.545	849.543	362.76	426.398	848.998	393.929	320.695	821.374	368.612
337	3.36	624.297	1337.29	141.961	660.242	1326.81	72.9346	671.336	1340.72	203.594	739.642	1144.25	-10.6894	774.828	1173.14	308.024	682.66	1127.55	160.878	742.132	782.263	-91.958	473.566	838.693	-37.7079	495.682	843.444	35.3386	403.534	845.032	11.5436	304.72	821.834	4.27579	775.688	806.509	415.189	508.994	826.05	433.062	514.542	849.552	362.757	426.413	848.994	393.92	320.709	821.342	368.58
338	3.37	624.396	1337.27	141.888	660.23	1326.8	72.8958	671.317	1340.7	203.571	739.624	1144.22	-10.7197	774.789	1173.12	308.01	682.643	1127.54	160.946	742.122	782.195	-91.9815	473.602	838.625	-37.7348	495.703	843.411	35.3188	403.47	845.009	11.537	304.76	821.815	4.24902	775.651	806.513	415.2	509.007	826.068	433.088	514.492	849.567	362.761	426.425	848.986	393.906	320.711	821.344	368.562
339	3.38	624.318	1337.28	141.861	660.215	1326.77	72.8573	671.254	1340.7	203.541	739.578	1144.16	-10.739	774.752	1173.11	308.001	682.821	1127.43	160.868	742.141	782.141	-91.9957	473.634	838.556	-37.7677	495.774	843.359	35.2647	403.494	845.005	11.522	304.79	821.805	4.20943	775.653	806.514	415.224	508.949	826.064	433.071	514.525	849.573	362.797	426.418	848.969	393.891	320.688	821.346	368.558
340	3.39	624.224	1337.24	141.872	660.171	1326.75	72.8397	671.173	1340.7	203.497	739.535	1144.1	-10.7493	774.696	1173.1	308	682.881	1127.32	160.81	742.156	782.065	-91.9853	473.652	838.488	-37.7986	495.766	843.334	35.2411	403.538	845.013	11.4938	304.8	821.794	4.183	775.631	806.498	415.233	508.917	826.066	433.052	514.545	849.561	362.818	426.405	848.944	393.887	320.674	821.333	368.55
341	3.4	624.227	1337.2	141.867	660.095	1326.74	72.8524	671.113	1340.7	203.478	739.5	1144.05	-10.7498	774.692	1173.07	307.989	682.903	1127.2	160.804	742.203	782.033	-91.9539	473.653	838.439	-37.8025	495.772	843.288	35.2326	403.57	845.015	11.5004	304.786	821.778	4.19629	775.607	806.484	415.232	508.909	826.032	433.065	514.553	849.534	362.833	426.405	848.932	393.918	320.697	821.333	368.577
342	3.41	624.132	1337.19	141.866	660.021	1326.73	72.8741	671.053	1340.69	203.473	739.492	1144.02	-10.7372	774.645	1173.06	307.98	682.874	1127.11	160.832	742.261	782.021	-91.9009	473.662	838.409	-37.7915	495.8	843.244	35.2359	403.612	844.999	11.5264	304.771	821.781	4.23312	775.603	806.476	415.239	508.902	826	433.092	514.589	849.486	362.851	426.411	848.938	393.957	320.763	821.337	368.618
343	3.42	624.014	1337.21	141.827	659.965	1326.72	72.8494	670.96	1340.67	203.447	739.46	1143.98	-10.7341	774.62	1173.06	307.992	682.846	1127.07	160.881	742.308	781.997	-91.8468	473.673	838.392	-37.7935	495.762	843.242	35.246	403.604	844.999	11.5194	304.762	821.782	4.23537	775.636	806.499	415.25	508.927	825.98	433.096	514.583	849.456	362.845	426.408	848.941	393.966	320.773	821.323	368.629
344	3.43	624.036	1337.19	141.766	659.895	1326.7	72.8146	670.891	1340.67	203.411	739.432	1143.93	-10.7516	774.584	1173.04	307.977	682.814	1127.04	160.852	742.329	781.961	-91.8397	473.702	838.393	-37.8178	495.749	843.271	35.2248	403.615	845.011	11.4945	304.78	821.795	4.20773	775.656	806.503	415.259	508.936	825.981	433.073	514.588	849.456	362.825	426.422	848.953	393.954	320.744	821.331	368.613
345	3.44	624.013	1337.17	141.721	659.853	1326.72	72.7801	670.841	1340.66	203.38	739.449	1143.91	-10.7552	774.578	1173.06	307.952	682.696	1127.06	160.871	742.356	781.932	-91.8448	473.741	838.404	-37.8443	495.792	843.317	35.2175	403.626	845.025	11.4576	304.782	821.837	4.18062	775.671	806.496	415.25	508.941	826.009	433.081	514.608	849.498	362.814	426.45	848.971	393.942	320.743	821.348	368.58
346	3.45	623.831	1337.16	141.709	659.777	1326.71	72.7713	670.756	1340.65	203.354	739.439	1143.9	-10.7533	774.607	1173.06	307.924	682.697	1127.05	160.817	742.381	781.902	-91.8078	473.72	838.407	-37.8589	495.832	843.318	35.1821	403.611	845.055	11.4441	304.746	821.875	4.18249	775.669	806.487	415.228	508.953	826.052	433.077	514.61	849.514	362.796	426.444	849.002	393.939	320.719	821.371	368.57
347	3.46	623.671	1337.13	141.693	659.692	1326.68	72.7626	670.649	1340.61	203.311	739.43	1143.89	-10.7514	774.608	1173.03	307.899	682.7	1127.04	160.751	742.377	781.853	-91.7973	473.702	838.391	-37.8816	495.829	843.316	35.1513	403.637	845.07	11.4089	304.738	821.892	4.15393	775.653	806.481	415.221	508.968	826.063	433.054	514.597	849.528	362.779	426.42	849.009	393.927	320.682	821.38	368.557
348	3.47	623.675	1337.04	141.638	659.644	1326.63	72.763	670.574	1340.56	203.298	739.435	1143.84	-10.773	774.598	1172.99	307.9	682.743	1126.95	160.735	742.38	781.828	-91.829	473.721	838.355	-37.9032	495.793	843.299	35.1486	403.643	845.058	11.3816	304.793	821.861	4.11737	775.639	806.457	415.194	508.96	826.037	433.036	514.586	849.513	362.772	426.418	848.974	393.899	320.684	821.36	368.553
349	3.48	623.615	1336.92	141.671	659.619	1326.56	72.7731	670.56	1340.51	203.334	739.447	1143.78	-10.7832	774.613	1172.99	307.89	682.792	1126.88	160.776	742.42	781.816	-91.8602	473.766	838.28	-37.9191	495.809	843.274	35.1468	403.646	845.02	11.3707	304.851	821.827	4.10271	775.647	806.455	415.159	508.955	826.026	433.04	514.586	849.51	362.782	426.422	848.941	393.905	320.721	821.314	368.544
350	3.49	623.474	1336.82	141.755	659.569	1326.5	72.7969	670.519	1340.47	203.371	739.458	1143.72	-10.7632	774.604	1173	307.898	682.833	1126.86	160.816	742.408	781.787	-91.8708	473.783	838.24	-37.9177	495.849	843.257	35.1356	403.703	845.003	11.3713	304.844	821.821	4.11574	775.653	806.444	415.142	508.928	826.019	433.053	514.51	849.5	362.784	426.412	848.94	393.923	320.73	821.283	368.559
351	3.5	623.286	1336.78	141.813	659.496	1326.48	72.8123	670.418	1340.45	203.395	739.466	1143.7	-10.767	774.617	1172.98	307.872	682.872	1126.8	160.761	742.445	781.771	-91.8666	473.789	838.221	-37.9307	495.848	843.231	35.1204	403.703	845.016	11.3742	304.812	821.828	4.11856	775.658	806.426	415.135	508.873	826.011	433.047	514.484	849.485	362.765	426.388	848.947	393.928	320.705	821.298	368.558
352	3.51	623.111	1336.79	141.883	659.413	1326.49	72.8581	670.383	1340.44	203.449	739.513	1143.7	-10.7762	774.66	1172.94	307.849	682.919	1126.71	160.737	742.461	781.751	-91.8448	473.796	838.207	-37.9355	495.869	843.206	35.083	403.686	845.026	11.3528	304.793	821.849	4.13207	775.668	806.397	415.113	508.886	826.009	433.048	514.474	849.488	362.743	426.39	848.972	393.93	320.675	821.349	368.562
353	3.52	622.968	1336.81	141.965	659.357	1326.5	72.9024	670.371	1340.43	203.509	739.54	1143.66	-10.767	774.66	1172.9	307.841	682.885	1126.7	160.75	742.504	781.742	-91.8094	473.794	838.198	-37.9331	495.888	843.202	35.0656	403.697	845.025	11.3346	304.829	821.869	4.12133	775.66	806.356	415.08	508.914	826.011	433.054	514.535	849.502	362.743	426.402	849.001	393.95	320.684	821.375	368.588
354	3.53	622.858	1336.81	142.05	659.34	1326.51	72.9244	670.379	1340.42	203.552	739.55	1143.61	-10.7602	774.683	1172.87	307.834	682.867	1126.69	160.74	742.525	781.688	-91.7939	473.818	838.148	-37.9538	495.899	843.183	35.0629	403.721	845.031	11.3127	304.892	821.867	4.09686	775.65	806.321	415.06	508.946	826.022	433.072	514.596	849.508	362.77	426.416	849.003	393.964	320.714	821.379	368.617
355	3.54	622.898	1336.76	142.081	659.348	1326.51	72.9345	670.417	1340.41	203.593	739.583	1143.55	-10.7914	774.712	1172.84	307.826	682.93	1126.64	160.724	742.565	781.631	-91.8069	473.872	838.083	-38	495.953	843.142	35.0278	403.779	845.026	11.2784	304.918	821.845	4.06355	775.675	806.298	415.042	508.957	826.013	433.063	514.61	849.49	362.772	426.448	848.982	393.961	320.731	821.352	368.599
356	3.55	622.942	1336.72	142.102	659.331	1326.49	72.9408	670.442	1340.39	203.615	739.585	1143.47	-10.8218	774.741	1172.81	307.811	683.069	1126.53	160.692	742.638	781.562	-91.804	473.952	838.01	-38.0707	495.997	843.11	34.9816	403.807	845.012	11.2596	304.945	821.817	4.0368	775.667	806.251	415.017	508.943	825.996	433.054	514.641	849.476	362.764	426.483	848.947	393.925	320.767	821.314	368.592
357	3.56	623.012	1336.73	142.098	659.305	1326.5	72.9586	670.434	1340.37	203.62	739.569	1143.4	-10.8313	774.727	1172.76	307.815	683.133	1126.43	160.666	742.597	781.461	-91.8052	474.008	837.951	-38.115	496.019	843.088	34.9554	403.804	845.008	11.2384	304.962	821.808	4.00496	775.653	806.212	415	508.945	825.999	433.043	514.637	849.439	362.757	426.486	848.927	393.905	320.791	821.287	368.579
358	3.57	622.945	1336.77	142.132	659.298	1326.52	72.9726	670.451	1340.38	203.636	739.549	1143.35	-10.8392	774.713	1172.75	307.806	683.115	1126.35	160.613	742.603	781.402	-91.763	474.045	837.932	-38.1654	496.047	843.078	34.934	403.804	844.986	11.2072	304.982	821.811	3.98127	775.627	806.183	414.994	508.988	826.001	433.038	514.605	849.422	362.727	426.465	848.927	393.898	320.762	821.29	368.561
359	3.58	622.838	1336.83	142.19	659.283	1326.55	73.0048	670.478	1340.41	203.661	739.547	1143.32	-10.8442	774.689	1172.75	307.79	683.022	1126.34	160.619	742.649	781.393	-91.7142	474.059	837.948	-38.1876	496.045	843.087	34.9297	403.811	845.014	11.1896	305.003	821.833	3.97334	775.664	806.187	414.992	508.976	825.997	433.017	514.587	849.426	362.705	426.451	848.957	393.892	320.733	821.321	368.557
360	3.59	622.732	1336.92	142.283	659.258	1326.61	73.0346	670.487	1340.45	203.705	739.56	1143.32	-10.8371	774.684	1172.74	307.765	682.907	1126.39	160.663	742.696	781.407	-91.6548	474.036	837.966	-38.1537	496.022	843.107	34.9358	403.81	845.035	11.1837	304.993	821.864	3.99176	775.681	806.192	414.985	508.953	826.002	433.024	514.597	849.458	362.694	426.445	849.003	393.913	320.713	821.379	368.573
361	3.6	622.761	1336.96	142.361	659.243	1326.65	73.0613	670.49	1340.47	203.746	739.577	1143.3	-10.8204	774.708	1172.74	307.761	682.956	1126.36	160.668	742.686	781.384	-91.6128	474.019	837.995	-38.1207	496.033	843.096	34.9333	403.805	845.079	11.1955	304.968	821.873	4.00965	775.65	806.186	414.979	508.953	826.008	433.027	514.594	849.459	362.689	426.441	849.019	393.936	320.704	821.407	368.582
362	3.61	622.867	1336.94	142.375	659.237	1326.66	73.0726	670.491	1340.47	203.771	739.601	1143.28	-10.8238	774.699	1172.75	307.766	682.942	1126.32	160.692	742.704	781.368	-91.592	474.043	837.983	-38.1331	496.014	843.077	34.9328	403.83	845.072	11.186	304.952	821.886	4.00715	775.634	806.193	414.994	508.939	825.992	433.031	514.612	849.451	362.711	426.429	849.007	393.941	320.709	821.399	368.594
363	3.62	622.918	1336.91	142.367	659.268	1326.68	73.078	670.499	1340.47	203.782	739.598	1143.24	-10.8112	774.688	1172.73	307.787	682.984	1126.26	160.69	742.746	781.354	-91.5541	474.087	837.933	-38.1563	496.02	843.067	34.9401	403.884	845.051	11.1843	304.987	821.864	4.00249	775.674	806.209	414.983	508.914	825.989	433.039	514.578	849.436	362.707	426.437	848.98	393.931	320.724	821.377	368.596
364	3.63	622.914	1336.9	142.373	659.28	1326.69	73.1009	670.505	1340.45	203.816	739.609	1143.21	-10.794	774.681	1172.72	307.806	683.042	1126.22	160.674	742.772	781.337	-91.5073	474.102	837.886	-38.1606	496.023	843.083	34.9513	403.842	845.075	11.2237	305.006	821.853	3.9975	775.692	806.204	414.972	508.908	825.976	433.043	514.526	849.414	362.715	426.441	848.947	393.931	320.73	821.352	368.596
365	3.64	622.854	1336.92	142.408	659.255	1326.69	73.1488	670.493	1340.45	203.855	739.609	1143.17	-10.7857	774.669	1172.71	307.825	683.04	1126.15	160.672	742.77	781.291	-91.4553	474.095	837.877	-38.1432	496.007	843.094	34.959	403.799	845.106	11.2556	304.99	821.856	4.01666	775.701	806.204	414.985	508.927	825.962	433.047	514.546	849.414	362.724	426.417	848.943	393.943	320.722	821.342	368.606
366	3.65	622.821	1336.9	142.438	659.212	1326.68	73.1714	670.504	1340.43	203.877	739.634	1143.12	-10.7816	774.654	1172.69	307.831	683.076	1126.07	160.654	742.745	781.243	-91.426	474.093	837.869	-38.1559	496.035	843.077	34.9365	403.847	845.063	11.1885	304.994	821.853	4.00963	775.681	806.18	414.976	508.935	825.964	433.044	514.55	849.419	362.728	426.397	848.929	393.943	320.711	821.337	368.603
367	3.66	622.805	1336.86	142.443	659.239	1326.67	73.1509	670.515	1340.41	203.856	739.634	1143.06	-10.797	774.676	1172.69	307.839	683.088	1126.04	160.638	742.735	781.173	-91.4449	474.105	837.855	-38.2018	496.073	843.068	34.9144	403.827	845.05	11.1677	305.005	821.853	3.9848	775.684	806.167	414.982	508.928	825.967	433.02	514.569	849.419	362.706	426.42	848.9	393.925	320.71	821.297	368.59
368	3.67	622.865	1336.84	142.423	659.29	1326.64	73.1198	670.513	1340.39	203.842	739.676	1143.03	-10.8215	774.709	1172.69	307.815	683.214	1126	160.615	742.739	781.106	-91.4807	474.149	837.817	-38.2568	496.08	843.035	34.8863	403.836	845.048	11.1455	305.067	821.848	3.95282	775.681	806.138	414.969	508.941	825.974	433.009	514.544	849.389	362.671	426.454	848.893	393.898	320.726	821.269	368.557
369	3.68	622.892	1336.86	142.449	659.336	1326.64	73.1044	670.561	1340.41	203.873	739.733	1143.01	-10.8343	774.726	1172.67	307.819	683.157	1126.05	160.639	742.776	781.088	-91.495	474.165	837.817	-38.2537	496.109	843.023	34.8501	403.865	845.051	11.1327	305.098	821.848	3.93702	775.682	806.114	414.96	508.985	825.989	433.035	514.593	849.401	362.674	426.486	848.919	393.892	320.747	821.284	368.558
370	3.69	622.963	1336.89	142.455	659.338	1326.65	73.1256	670.587	1340.43	203.906	739.775	1142.99	-10.8193	774.743	1172.67	307.824	683.219	1126.06	160.633	742.814	781.084	-91.4542	474.195	837.857	-38.2423	496.139	843.048	34.8677	403.919	845.04	11.1173	305.108	821.857	3.95344	775.69	806.11	414.961	509.002	826.008	433.048	514.627	849.426	362.695	426.487	848.953	393.896	320.747	821.321	368.574
371	3.7	622.893	1336.94	142.474	659.308	1326.7	73.1472	670.567	1340.44	203.919	739.809	1143	-10.8027	774.754	1172.69	307.818	683.237	1126.02	160.597	742.847	781.095	-91.4115	474.214	837.947	-38.24	496.208	843.075	34.8215	403.948	845.083	11.1205	305.097	821.894	3.99334	775.671	806.099	414.972	509.005	826.043	433.024	514.635	849.474	362.683	426.459	849.014	393.899	320.717	821.403	368.581
372	3.71	622.858	1336.99	142.487	659.301	1326.72	73.1715	670.529	1340.48	203.926	739.836	1143.02	-10.7948	774.78	1172.68	307.826	683.254	1125.96	160.602	742.813	781.107	-91.41	474.155	838.057	-38.2396	496.244	843.071	34.7707	404	845.116	11.0851	305.062	821.938	4.00513	775.611	806.078	414.962	508.97	826.049	433.005	514.6	849.485	362.663	426.432	849.066	393.909	320.696	821.464	368.593
373	3.72	622.822	1336.97	142.513	659.28	1326.73	73.1914	670.518	1340.48	203.933	739.871	1143.02	-10.78	774.788	1172.65	307.83	683.219	1125.94	160.586	742.761	781.114	-91.4092	474.094	838.118	-38.2141	496.215	843.095	34.7811	403.972	845.123	11.1075	305.058	821.942	4.0245	775.598	806.078	414.95	508.928	826.048	433.014	514.57	849.484	362.672	426.422	849.077	393.922	320.706	821.489	368.602
374	3.73	622.76	1336.97	142.607	659.277	1326.72	73.2156	670.549	1340.46	203.981	739.911	1142.98	-10.7642	774.801	1172.6	307.852	683.38	1125.89	160.572	742.661	781.05	-91.4677	474.066	838.158	-38.1771	496.175	843.11	34.82	403.983	845.124	11.1262	305.062	821.915	4.0576	775.603	806.055	414.939	508.96	826.043	433.032	514.551	849.454	362.681	426.42	849.05	393.925	320.719	821.466	368.606
375	3.74	622.817	1336.89	142.647	659.36	1326.67	73.21	670.656	1340.47	204.037	739.947	1142.9	-10.7794	774.799	1172.56	307.85	683.521	1125.84	160.577	742.593	780.966	-91.5473	474.115	838.113	-38.1949	496.157	843.116	34.8488	403.941	845.1	11.1674	305.093	821.825	4.06681	775.632	806.026	414.94	508.966	826.002	433.045	514.589	849.416	362.687	426.469	848.962	393.917	320.787	821.375	368.604
376	3.75	623.005	1336.77	142.645	659.416	1326.63	73.2152	670.746	1340.48	204.094	739.995	1142.82	-10.808	774.796	1172.53	307.85	683.552	1125.83	160.574	742.505	780.849	-91.629	474.158	838.049	-38.2453	496.133	843.101	34.8688	403.842	845.113	11.2507	305.132	821.737	4.07368	775.68	806.005	414.933	508.94	825.966	433.051	514.628	849.387	362.711	426.481	848.868	393.889	320.798	821.265	368.568
377	3.76	623.114	1336.73	142.662	659.438	1326.63	73.2195	670.776	1340.42	204.09	740.04	1142.77	-10.8247	774.84	1172.51	307.857	683.522	1125.82	160.572	742.39	780.747	-91.691	474.171	838.028	-38.2724	496.074	843.121	34.8829	403.73	845.207	11.3364	305.117	821.711	4.07404	775.687	805.986	414.915	508.939	825.92	433.055	514.625	849.378	362.739	426.52	848.817	393.885	320.807	821.193	368.556
378	3.77	623.013	1336.8	142.713	659.436	1326.67	73.2431	670.865	1340.47	204.151	740.076	1142.75	-10.8094	774.924	1172.53	307.856	683.564	1125.8	160.551	742.452	780.78	-91.6438	474.149	838.062	-38.2551	496.1	843.123	34.8752	403.794	845.192	11.3283	305.072	821.751	4.11291	775.698	805.965	414.91	509.003	825.917	433.056	514.638	849.363	362.735	426.536	848.835	393.898	320.846	821.186	368.559
379	3.78	623.085	1336.91	142.72	659.466	1326.75	73.2759	670.902	1340.4	204.154	740.119	1142.77	-10.7938	774.968	1172.54	307.844	683.557	1125.83	160.582	742.514	780.832	-91.5866	474.097	838.143	-38.2202	496.153	843.133	34.855	403.932	845.128	11.2392	305.053	821.807	4.11676	775.727	805.968	414.905	508.995	825.921	433.027	514.622	849.351	362.711	426.524	848.897	393.91	320.837	821.25	368.588
380	3.79	623.165	1337.04	142.732	659.502	1326.85	73.3077	670.907	1340.43	204.18	740.175	1142.8	-10.7914	774.987	1172.56	307.839	683.496	1125.86	160.598	742.559	780.888	-91.585	474.087	838.241	-38.2073	496.172	843.142	34.8284	403.95	845.152	11.1927	305.033	821.897	4.13117	775.713	805.964	414.888	508.955	825.94	433.005	514.638	849.383	362.7	426.498	848.985	393.931	320.798	821.351	368.615
381	3.8	623.151	1337.15	142.763	659.496	1326.92	73.3367	670.913	1340.47	204.202	740.231	1142.82	-10.7909	775.021	1172.57	307.814	683.544	1125.87	160.559	742.553	780.89	-91.5788	474.072	838.304	-38.1945	496.158	843.169	34.8143	403.979	845.175	11.1661	305.026	821.948	4.12916	775.69	805.958	414.864	508.953	825.972	433.014	514.674	849.425	362.714	426.469	849.068	393.945	320.762	821.435	368.645
382	3.81	623.19	1337.17	142.787	659.561	1326.97	73.3431	670.966	1340.51	204.24	740.251	1142.81	-10.8045	775	1172.55	307.799	683.58	1125.88	160.538	742.539	780.855	-91.571	474.077	838.296	-38.2141	496.188	843.181	34.8043	403.955	845.202	11.1588	305.025	821.986	4.11675	775.673	805.964	414.838	508.954	826.002	433.011	514.642	849.456	362.691	426.465	849.096	393.933	320.72	821.467	368.637
383	3.82	623.345	1337.15	142.764	659.63	1326.99	73.338	671.006	1340.5	204.254	740.319	1142.75	-10.8381	774.999	1172.56	307.776	683.58	1125.89	160.525	742.513	780.782	-91.5875	474.118	838.258	-38.2693	496.263	843.147	34.7707	403.933	845.24	11.1644	305.098	821.966	4.08675	775.683	805.969	414.83	508.94	826.008	433.007	514.59	849.465	362.645	426.467	849.07	393.914	320.713	821.448	368.615
384	3.83	623.429	1337.12	142.791	659.683	1326.99	73.3404	671.051	1340.46	204.267	740.338	1142.68	-10.8716	775.02	1172.54	307.767	683.415	1125.94	160.549	742.488	780.671	-91.6052	474.184	838.173	-38.3175	496.287	843.112	34.7562	403.908	845.244	11.2084	305.115	821.913	4.06682	775.705	805.971	414.82	508.936	826	433.007	514.573	849.442	362.644	426.461	849.038	393.907	320.711	821.411	368.604
385	3.84	623.474	1337.1	142.83	659.747	1326.99	73.3677	671.124	1340.42	204.305	740.344	1142.59	-10.8851	775.016	1172.51	307.782	683.497	1125.85	160.568	742.473	780.571	-91.6258	474.216	838.091	-38.3368	496.25	843.107	34.7643	403.994	845.158	11.1633	305.137	821.86	4.06574	775.672	805.916	414.801	508.966	825.997	433.025	514.603	849.406	362.663	426.463	848.994	393.911	320.726	821.354	368.604
386	3.85	623.613	1337.06	142.877	659.809	1326.98	73.4074	671.205	1340.4	204.342	740.384	1142.52	-10.8904	775.039	1172.48	307.807	683.652	1125.8	160.583	742.38	780.418	-91.6454	474.228	838.029	-38.3386	496.185	843.096	34.7905	403.927	845.18	11.2052	305.187	821.833	4.08029	775.689	805.86	414.778	508.982	825.96	433.036	514.602	849.363	362.686	426.469	848.946	393.924	320.738	821.298	368.613
387	3.86	623.806	1337.04	142.897	659.879	1326.98	73.4078	671.272	1340.37	204.369	740.45	1142.45	-10.9145	775.066	1172.46	307.806	683.724	1125.78	160.569	742.317	780.267	-91.644	474.241	837.975	-38.3527	496.222	843.049	34.7849	403.84	845.268	11.2542	305.207	821.79	4.09056	775.713	805.819	414.767	508.989	825.937	433.032	514.608	849.326	362.687	426.493	848.908	393.924	320.783	821.252	368.606
388	3.87	623.854	1337.04	142.891	659.912	1327.01	73.4149	671.317	1340.35	204.396	740.494	1142.41	-10.9431	775.069	1172.46	307.767	683.824	1125.7	160.537	742.34	780.196	-91.6117	474.268	837.953	-38.3883	496.272	843.031	34.7478	403.853	845.261	11.2345	305.23	821.776	4.06248	775.689	805.775	414.752	508.967	825.911	433.011	514.584	849.305	362.67	426.515	848.898	393.912	320.798	821.252	368.594
389	3.88	623.827	1337.13	142.92	659.933	1327.05	73.4352	671.379	1340.37	204.414	740.548	1142.41	-10.9606	775.069	1172.44	307.751	683.852	1125.68	160.486	742.427	780.215	-91.5546	474.269	837.984	-38.3874	496.268	843.037	34.7344	403.899	845.245	11.1864	305.243	821.819	4.04949	775.696	805.765	414.741	508.984	825.904	433.004	514.609	849.31	362.66	426.54	848.933	393.919	320.806	821.284	368.605
390	3.89	623.801	1337.24	142.969	659.909	1327.11	73.4741	671.418	1340.4	204.456	740.604	1142.41	-10.9645	775.085	1172.44	307.747	683.765	1125.7	160.51	742.534	780.265	-91.4697	474.245	838.035	-38.3395	496.273	843.038	34.7298	403.944	845.214	11.1521	305.21	821.87	4.07416	775.706	805.77	414.755	509.022	825.944	433.021	514.669	849.343	362.673	426.527	848.989	393.945	320.803	821.336	368.636
391	3.9	623.653	1337.31	143.032	659.914	1327.16	73.5173	671.412	1340.43	204.503	740.646	1142.41	-10.9565	775.149	1172.45	307.756	683.668	1125.77	160.534	742.611	780.308	-91.3551	474.242	838.074	-38.3087	496.301	843.03	34.7159	403.875	845.299	11.1944	305.181	821.918	4.09707	775.694	805.781	414.768	509.027	825.964	433.03	514.624	849.346	362.669	426.484	849.037	393.959	320.776	821.404	368.674
392	3.91	623.613	1337.33	143.087	659.917	1327.2	73.5392	671.452	1340.45	204.528	740.682	1142.4	-10.9555	775.203	1172.47	307.736	683.699	1125.79	160.505	742.671	780.331	-91.2994	474.213	838.082	-38.2864	496.323	843.025	34.7227	403.957	845.269	11.1387	305.189	821.936	4.09943	775.693	805.804	414.776	509.003	825.976	433.014	514.632	849.376	362.655	426.461	849.066	393.959	320.732	821.444	368.679
393	3.92	623.829	1337.24	143.113	659.926	1327.22	73.573	671.513	1340.46	204.549	740.719	1142.37	-10.9814	775.199	1172.49	307.72	683.796	1125.75	160.516	742.66	780.282	-91.3073	474.236	838.059	-38.2891	496.306	843.03	34.7355	404.065	845.201	11.0675	305.193	821.936	4.09685	775.687	805.826	414.782	509.021	825.993	433.019	514.662	849.401	362.652	426.461	849.066	393.959	320.718	821.449	368.673
394	3.93	623.96	1337.2	143.142	659.976	1327.19	73.5746	671.583	1340.45	204.564	740.768	1142.32	-11.0129	775.214	1172.5	307.737	683.75	1125.81	160.527	742.539	780.127	-91.3671	474.268	838.017	-38.317	496.289	843.044	34.7565	404.028	845.241	11.1141	305.197	821.929	4.08454	775.701	805.85	414.78	509.022	826.007	433.011	514.636	849.399	362.646	426.443	849.041	393.937	320.742	821.399	368.646
395	3.94	623.955	1337.19	143.117	660.015	1327.16	73.5531	671.605	1340.41	204.546	740.793	1142.26	-11.0578	775.241	1172.5	307.734	683.769	1125.78	160.482	742.446	779.948	-91.4453	474.315	837.952	-38.3723	496.299	843.042	34.7298	403.912	845.348	11.1855	305.222	821.896	4.0352	775.712	805.863	414.78	509.008	826.008	432.988	514.595	849.404	362.612	426.454	848.996	393.89	320.71	821.334	368.58
396	3.95	624.098	1337.15	143.066	660.061	1327.14	73.528	671.637	1340.35	204.521	740.872	1142.2	-11.1104	775.255	1172.5	307.698	683.762	1125.78	160.464	742.412	779.814	-91.5262	474.366	837.91	-38.4322	496.332	843.058	34.6843	403.921	845.374	11.1723	305.264	821.859	3.98326	775.729	805.856	414.793	509.058	826.018	432.977	514.607	849.405	362.601	426.499	848.949	393.839	320.73	821.26	368.522
397	3.96	624.175	1337.11	143.115	660.067	1327.15	73.5637	671.736	1340.32	204.553	740.952	1142.16	-11.1362	775.313	1172.49	307.673	683.788	1125.76	160.461	742.408	779.753	-91.5501	474.368	837.9	-38.4312	496.311	843.05	34.6888	403.898	845.391	11.1694	305.268	821.869	3.98711	775.732	805.831	414.772	509.07	826.006	432.995	514.627	849.373	362.606	426.531	848.921	393.842	320.792	821.253	368.545
398	3.97	624.119	1337.12	143.235	660.054	1327.19	73.6561	671.757	1340.32	204.626	740.979	1142.13	-11.1248	775.32	1172.46	307.664	683.975	1125.69	160.447	742.495	779.818	-91.4518	474.355	837.911	-38.3605	496.304	843.034	34.7483	403.926	845.348	11.1724	305.236	821.892	4.0343	775.74	805.816	414.77	509.052	825.966	433.002	514.646	849.352	362.639	426.527	848.943	393.904	320.795	821.307	368.623
399	3.98	624.053	1337.14	143.327	659.996	1327.25	73.7398	671.769	1340.33	204.707	741	1142.11	-11.0905	775.303	1172.43	307.693	683.994	1125.67	160.443	742.584	779.89	-91.3434	474.343	837.917	-38.2987	496.312	843	34.7756	404.083	845.236	11.0996	305.219	821.926	4.10342	775.761	805.815	414.778	509.023	825.921	433.014	514.638	849.332	362.673	426.519	848.973	393.963	320.782	821.356	368.682
400	3.99	624.068	1337.13	143.426	659.999	1327.27	73.7662	671.803	1340.31	204.731	741.031	1142.08	-11.0946	775.312	1172.42	307.688	684.004	1125.6	160.445	742.652	779.908	-91.3131	474.369	837.89	-38.3014	496.342	842.956	34.7549	404.19	845.181	11.0591	305.277	821.928	4.10844	775.77	805.829	414.777	508.969	825.903	433.016	514.639	849.319	362.672	426.524	848.973	393.966	320.806	821.353	368.691
401	4	624.208	1337.08	143.457	660.061	1327.26	73.7775	671.861	1340.29	204.756	741.059	1142.04	-11.1265	775.336	1172.43	307.672	684.09	1125.59	160.458	742.622	779.821	-91.3816	474.395	837.85	-38.3137	496.323	842.942	34.7653	404.17	845.206	11.0925	305.325	821.903	4.10318	775.73	805.826	414.765	508.967	825.921	433.01	514.668	849.311	362.682	426.544	848.969	393.964	320.854	821.341	368.698
402	4.01	624.226	1337.06	143.49	660.084	1327.26	73.787	671.878	1340.29	204.789	741.068	1142	-11.1467	775.354	1172.44	307.679	684.054	1125.61	160.47	742.601	779.734	-91.4452	474.415	837.832	-38.3243	496.318	842.933	34.7611	404.088	845.268	11.1501	305.327	821.888	4.11172	775.688	805.815	414.745	508.974	825.948	433.017	514.679	849.328	362.691	426.533	848.98	393.973	320.827	821.353	368.686
403	4.02	624.133	1337.09	143.488	660.087	1327.26	73.7961	671.875	1340.3	204.804	741.047	1141.97	-11.16	775.361	1172.46	307.649	683.887	1125.68	160.491	742.599	779.66	-91.4708	474.43	837.83	-38.3475	496.394	842.922	34.7133	404.158	845.268	11.1186	305.295	821.918	4.09725	775.69	805.812	414.742	508.989	825.967	433.009	514.645	849.372	362.662	426.496	849.006	393.95	320.787	821.354	368.661
404	4.03	624.089	1337.12	143.464	660.049	1327.27	73.7919	671.871	1340.3	204.789	741.065	1141.95	-11.1917	775.417	1172.48	307.606	683.905	1125.73	160.463	742.587	779.596	-91.4953	474.432	837.817	-38.3939	496.456	842.912	34.6626	404.08	845.383	11.129	305.312	821.932	4.03917	775.699	805.816	414.731	509.029	826.009	432.986	514.607	849.405	362.599	426.476	849.018	393.904	320.74	821.373	368.619
405	4.04	624.05	1337.12	143.476	660.036	1327.28	73.7732	671.859	1340.28	204.785	741.074	1141.93	-11.2257	775.414	1172.47	307.586	683.925	1125.74	160.436	742.536	779.527	-91.5303	474.462	837.799	-38.439	496.47	842.928	34.6315	404.113	845.405	11.0618	305.357	821.926	3.99086	775.685	805.805	414.714	509.047	826.033	432.957	514.619	849.408	362.573	426.455	849.022	393.881	320.707	821.379	368.581
406	4.05	624.068	1337.11	143.525	660.038	1327.29	73.8168	671.894	1340.28	204.812	741.082	1141.89	-11.2339	775.407	1172.45	307.598	683.848	1125.78	160.457	742.557	779.497	-91.5315	474.493	837.769	-38.4419	496.5	842.921	34.6168	404.17	845.403	11.038	305.359	821.928	3.98797	775.673	805.781	414.706	509.043	826.026	432.956	514.631	849.392	362.583	426.446	849.019	393.891	320.699	821.39	368.594
407	4.06	624.094	1337.08	143.599	660.015	1327.3	73.8806	671.906	1340.26	204.844	741.122	1141.86	-11.2241	775.413	1172.43	307.616	683.923	1125.73	160.463	742.622	779.478	-91.4839	474.517	837.743	-38.4225	496.472	842.911	34.6333	404.153	845.409	11.0687	305.326	821.934	4.02117	775.685	805.742	414.693	509.036	826.009	432.989	514.658	849.369	362.601	426.465	849.014	393.912	320.708	821.389	368.615
408	4.07	624.165	1337.03	143.676	660.038	1327.29	73.9091	671.967	1340.23	204.885	741.181	1141.81	-11.2181	775.429	1172.43	307.62	683.908	1125.72	160.446	742.665	779.428	-91.4888	474.531	837.693	-38.4235	496.431	842.884	34.6554	404.139	845.435	11.0919	305.357	821.903	4.04387	775.732	805.723	414.678	509.038	825.981	433.002	514.688	849.349	362.636	426.488	848.977	393.921	320.76	821.333	368.624
409	4.08	624.325	1336.97	143.71	660.089	1327.29	73.9254	672.06	1340.19	204.924	741.223	1141.75	-11.2248	775.442	1172.41	307.618	684.044	1125.59	160.428	742.682	779.375	-91.5059	474.542	837.648	-38.4199	496.449	842.861	34.6463	404.115	845.417	11.1032	305.408	821.87	4.0478	775.744	805.704	414.677	509.043	825.929	433.001	514.682	849.288	362.65	426.54	848.932	393.917	320.825	821.293	368.648
410	4.09	624.39	1336.95	143.746	660.082	1327.32	73.9692	672.079	1340.18	204.956	741.232	1141.73	-11.2216	775.462	1172.4	307.634	684.157	1125.49	160.418	742.646	779.343	-91.5099	474.537	837.629	-38.4179	496.471	842.848	34.6591	404.102	845.413	11.112	305.424	821.874	4.06021	775.717	805.686	414.663	509.052	825.901	433.001	514.68	849.273	362.649	426.557	848.924	393.94	320.846	821.302	368.678
411	4.1	624.289	1336.98	143.789	660.024	1327.37	74.0415	672.033	1340.19	205	741.205	1141.7	-11.205	775.45	1172.4	307.656	684.163	1125.51	160.433	742.75	779.392	-91.4433	474.515	837.627	-38.3976	496.469	842.861	34.6781	404.092	845.443	11.1436	305.395	821.915	4.07615	775.718	805.688	414.669	509.039	825.906	433	514.673	849.284	362.638	426.539	848.944	393.956	320.839	821.32	368.701
412	4.11	624.167	1337.03	143.812	659.972	1327.41	74.0698	672.019	1340.21	205.034	741.179	1141.7	-11.2071	775.423	1172.41	307.648	684.15	1125.54	160.42	742.802	779.396	-91.4129	474.523	837.644	-38.4004	496.487	842.866	34.6563	404.093	845.454	11.133	305.387	821.941	4.0645	775.749	805.721	414.679	509.008	825.948	432.99	514.669	849.328	362.646	426.532	848.971	393.953	320.816	821.355	368.685
413	4.12	624.235	1337.04	143.804	660.003	1327.42	74.0482	672.015	1340.21	205.022	741.185	1141.68	-11.2433	775.429	1172.42	307.641	684.158	1125.57	160.398	742.767	779.33	-91.4555	474.553	837.633	-38.449	496.49	842.89	34.6319	404.164	845.475	11.0688	305.42	821.938	4.03063	775.741	805.753	414.689	508.988	825.966	432.988	514.664	849.36	362.635	426.542	848.987	393.934	320.809	821.355	368.655
414	4.13	624.251	1337.03	143.815	660.019	1327.43	74.0375	672.036	1340.23	205.006	741.185	1141.66	-11.2779	775.44	1172.42	307.629	684.111	1125.57	160.375	742.711	779.257	-91.5089	474.6	837.612	-38.4882	496.521	842.872	34.6121	404.208	845.49	11.0405	305.468	821.927	3.99387	775.708	805.759	414.684	508.991	825.985	433.003	514.695	849.386	362.629	426.544	848.996	393.917	320.817	821.342	368.626
415	4.14	624.21	1337.01	143.85	659.991	1327.44	74.0657	672.027	1340.23	205.022	741.174	1141.62	-11.2862	775.459	1172.41	307.62	683.948	1125.61	160.412	742.715	779.232	-91.5206	474.6	837.579	-38.4843	496.556	842.826	34.5994	404.19	845.5	11.0595	305.448	821.942	4.00944	775.664	805.744	414.659	508.994	825.995	433.01	514.696	849.381	362.634	426.502	849.001	393.911	320.797	821.364	368.61
416	4.15	624.175	1337.03	143.874	659.973	1327.47	74.1012	672.001	1340.22	205.054	741.157	1141.59	-11.273	775.449	1172.42	307.63	684.031	1125.56	160.399	742.768	779.217	-91.4915	474.584	837.555	-38.452	496.554	842.814	34.6091	404.157	845.509	11.0794	305.431	821.946	4.03612	775.674	805.73	414.663	509.001	825.985	433.005	514.614	849.347	362.614	426.497	849	393.925	320.762	821.381	368.617
417	4.16	624.195	1337.04	143.898	659.976	1327.48	74.1395	672.066	1340.2	205.069	741.183	1141.55	-11.285	775.477	1172.43	307.643	684.13	1125.51	160.418	742.762	779.172	-91.5112	474.601	837.51	-38.4532	496.56	842.801	34.605	404.217	845.463	11.0422	305.462	821.947	4.03247	775.699	805.729	414.652	509.031	825.971	433.009	514.649	849.34	362.621	426.509	849.003	393.941	320.766	821.372	368.631
418	4.17	624.187	1337.04	143.893	659.964	1327.48	74.1558	672.092	1340.18	205.076	741.209	1141.52	-11.3027	775.484	1172.42	307.618	684.146	1125.54	160.44	742.738	779.101	-91.5615	474.64	837.466	-38.4896	496.589	842.768	34.5838	404.276	845.394	10.9846	305.462	821.947	4.02558	775.727	805.71	414.64	509.041	825.962	433.007	514.737	849.359	362.655	426.522	848.991	393.932	320.768	821.349	368.623
419	4.18	624.166	1337.05	143.876	659.952	1327.48	74.147	672.066	1340.16	205.077	741.224	1141.46	-11.3057	775.489	1172.41	307.612	684.011	1125.62	160.453	742.733	779.026	-91.5721	474.654	837.431	-38.5205	496.636	842.774	34.5492	404.263	845.453	10.9791	305.445	821.938	4.00506	775.734	805.669	414.644	509.034	825.942	432.985	514.765	849.348	362.634	426.509	848.978	393.92	320.747	821.321	368.582
420	4.19	624.132	1337.07	143.883	659.987	1327.47	74.1249	672.087	1340.15	205.084	741.244	1141.42	-11.3208	775.483	1172.38	307.611	684.027	1125.6	160.432	742.759	778.953	-91.5834	474.673	837.409	-38.5585	496.675	842.764	34.51	404.295	845.478	10.9627	305.454	821.92	3.99472	775.696	805.639	414.623	509.031	825.952	432.97	514.697	849.341	362.606	426.513	848.974	393.916	320.738	821.313	368.575
421	4.2	624.234	1337.03	143.888	660.015	1327.47	74.1302	672.065	1340.13	205.088	741.244	1141.4	-11.3388	775.513	1172.38	307.6	684.16	1125.51	160.395	742.747	778.886	-91.6254	474.717	837.374	-38.5722	496.687	842.748	34.4964	404.314	845.494	10.9486	305.485	821.916	3.98201	775.674	805.63	414.62	509.059	825.963	432.964	514.654	849.321	362.6	426.517	848.975	393.913	320.773	821.313	368.585
422	4.21	624.247	1336.99	143.927	660.021	1327.48	74.1552	672.07	1340.12	205.098	741.253	1141.35	-11.3416	775.505	1172.37	307.607	684.208	1125.45	160.388	742.747	778.856	-91.6321	474.737	837.343	-38.5586	496.674	842.734	34.5072	404.325	845.459	10.9676	305.506	821.924	4.0016	775.67	805.617	414.631	509.054	825.94	432.965	514.664	849.306	362.606	426.507	848.973	393.935	320.8	821.32	368.63
423	4.22	624.198	1336.99	144.012	660.008	1327.49	74.2228	672.106	1340.14	205.157	741.251	1141.31	-11.3324	775.506	1172.35	307.633	684.224	1125.45	160.432	742.802	778.874	-91.5886	474.752	837.298	-38.5134	496.637	842.692	34.5269	404.316	845.42	10.9924	305.515	821.92	4.05522	775.678	805.617	414.633	508.991	825.918	432.98	514.638	849.27	362.633	426.512	848.965	393.968	320.823	821.334	368.677
424	4.23	624.253	1336.98	144.044	659.997	1327.49	74.278	672.122	1340.13	205.184	741.263	1141.28	-11.3376	775.482	1172.33	307.623	684.224	1125.45	160.466	742.842	778.863	-91.5756	474.77	837.279	-38.5046	496.667	842.655	34.5213	404.331	845.408	10.9976	305.548	821.9	4.08352	775.693	805.646	414.639	508.94	825.891	433.019	514.641	849.262	362.635	426.507	848.96	393.973	320.829	821.333	368.697
425	4.24	624.336	1336.92	144.052	660.02	1327.51	74.2836	672.135	1340.11	205.185	741.266	1141.26	-11.3649	775.508	1172.33	307.608	684.289	1125.43	160.426	742.864	778.812	-91.612	474.808	837.264	-38.5378	496.722	842.629	34.4807	404.335	845.401	10.9854	305.561	821.905	4.07342	775.685	805.646	414.643	508.904	825.882	433.014	514.667	849.289	362.648	426.517	848.961	393.961	320.807	821.339	368.683
426	4.25	624.387	1336.92	144.023	660.027	1327.53	74.2626	672.142	1340.1	205.164	741.269	1141.23	-11.3849	775.532	1172.35	307.596	684.341	1125.43	160.397	742.894	778.757	-91.6341	474.802	837.279	-38.5813	496.738	842.639	34.4551	404.38	845.421	10.9463	305.587	821.917	4.06613	775.729	805.663	414.631	508.935	825.922	432.995	514.661	849.318	362.65	426.509	848.981	393.936	320.794	821.358	368.661
427	4.26	624.296	1336.99	144.023	660.053	1327.55	74.2578	672.122	1340.12	205.168	741.303	1141.21	-11.4057	775.566	1172.38	307.58	684.293	1125.46	160.444	742.923	778.706	-91.6186	474.811	837.29	-38.6015	496.767	842.658	34.4361	404.403	845.485	10.942	305.611	821.935	4.0699	775.766	805.685	414.638	508.967	825.958	432.986	514.634	849.326	362.614	426.51	849.011	393.922	320.776	821.372	368.635
428	4.27	624.233	1337.03	144.013	660.054	1327.57	74.2636	672.139	1340.13	205.167	741.325	1141.19	-11.4291	775.633	1172.43	307.519	684.163	1125.53	160.447	742.923	778.654	-91.6246	474.863	837.279	-38.6482	496.801	842.675	34.4236	404.473	845.558	10.9124	305.599	821.969	4.05386	775.747	805.695	414.653	509.028	826.003	432.995	514.693	849.348	362.591	426.535	849.034	393.91	320.774	821.364	368.615
429	4.28	624.247	1337.02	143.999	660.088	1327.59	74.2445	672.215	1340.11	205.162	741.349	1141.14	-11.4748	775.676	1172.44	307.467	684.103	1125.54	160.393	742.918	778.604	-91.6542	474.902	837.279	-38.6867	496.809	842.677	34.3921	404.485	845.587	10.8808	305.596	821.975	4.06786	775.729	805.666	414.65	509.033	826.007	432.976	514.682	849.344	362.574	426.546	849.027	393.885	320.79	821.351	368.596
430	4.29	624.256	1337.02	144.023	660.132	1327.59	74.2408	672.252	1340.11	205.163	741.378	1141.09	-11.5068	775.683	1172.42	307.497	684.09	1125.51	160.396	742.92	778.55	-91.6816	474.918	837.268	-38.7097	496.868	842.643	34.3494	404.535	845.569	10.8589	305.612	821.964	4.09722	775.73	805.659	414.653	509.054	825.985	432.943	514.684	849.333	362.587	426.549	848.999	393.874	320.785	821.333	368.583
431	4.3	624.338	1337.01	144.045	660.136	1327.61	74.2652	672.28	1340.1	205.198	741.404	1141.05	-11.4948	775.68	1172.4	307.513	684.089	1125.5	160.4	742.975	778.535	-91.6855	474.923	837.23	-38.6927	496.844	842.59	34.3766	404.56	845.544	10.8766	305.658	821.922	4.20222	775.792	805.68	414.682	509.021	825.949	432.959	514.696	849.318	362.615	426.565	848.965	393.892	320.816	821.318	368.602
432	4.31	624.449	1336.96	144.088	660.128	1327.62	74.3336	672.279	1340.07	205.234	741.426	1140.99	-11.4754	775.668	1172.35	307.541	684.174	1125.48	160.42	743.054	778.532	-91.6769	474.934	837.196	-38.6575	496.828	842.561	34.4082	404.524	845.513	10.9456	305.637	821.887	4.39195	775.841	805.695	414.688	509.007	825.915	433.006	514.695	849.277	362.633	426.558	848.952	393.938	320.845	821.327	368.649
433	4.32	624.494	1336.95	144.115	660.131	1327.62	74.382	672.297	1340.05	205.254	741.418	1140.92	-11.4849	775.662	1172.33	307.545	684.228	1125.46	160.432	743.082	778.498	-91.6904	474.96	837.174	-38.6233	496.871	842.515	34.4226	404.504	845.492	10.9988	305.614	821.878	4.48948	775.822	805.693	414.679	509.05	825.902	433.026	514.682	849.258	362.665	426.554	848.94	393.967	320.849	821.32	368.681
434	4.33	624.604	1336.95	144.083	660.175	1327.63	74.382	672.325	1340.04	205.249	741.436	1140.89	-11.4948	775.692	1172.36	307.559	684.352	1125.39	160.419	743.112	778.459	-91.7074	474.985	837.131	-38.622	496.861	842.489	34.4113	404.565	845.48	10.9878	305.672	821.871	4.48193	775.799	805.688	414.683	509.029	825.883	433.013	514.671	849.243	362.661	426.567	848.936	393.965	320.845	821.313	368.689
435	4.34	624.678	1336.92	144.044	660.209	1327.63	74.3417	672.324	1340.04	205.235	741.452	1140.86	-11.5352	775.707	1172.36	307.546	684.495	1125.34	160.356	743.142	778.409	-91.7067	474.987	837.121	-38.6476	496.89	842.478	34.381	404.607	845.519	10.9741	305.716	821.88	4.45808	775.761	805.673	414.674	508.999	825.886	433.004	514.696	849.252	362.638	426.554	848.958	393.959	320.851	821.337	368.69
436	4.35	624.527	1336.96	144.041	660.236	1327.64	74.2895	672.339	1340.05	205.214	741.452	1140.84	-11.5765	775.711	1172.35	307.519	684.426	1125.42	160.351	743.148	778.365	-91.7226	475.026	837.118	-38.7011	496.92	842.475	34.3595	404.626	845.54	10.9498	305.709	821.891	4.4927	775.73	805.639	414.667	509.02	825.911	432.991	514.701	849.268	362.615	426.545	848.977	393.93	320.822	821.357	368.668
437	4.36	624.521	1337.01	144.003	660.304	1327.63	74.2538	672.354	1340.05	205.175	741.483	1140.8	-11.6004	775.731	1172.36	307.497	684.291	1125.46	160.359	743.155	778.333	-91.7397	475.074	837.109	-38.7259	496.98	842.453	34.3292	404.682	845.527	10.9441	305.714	821.892	4.55381	775.748	805.643	414.658	509.033	825.946	432.985	514.719	849.297	362.606	426.521	849.002	393.898	320.798	821.363	368.63
438	4.37	624.6	1337	143.968	660.358	1327.62	74.2427	672.372	1340.05	205.174	741.531	1140.77	-11.6061	775.764	1172.38	307.479	684.319	1125.42	160.347	743.189	778.308	-91.7592	475.11	837.086	-38.735	497.028	842.448	34.2903	404.741	845.541	10.9436	305.761	821.899	4.57229	775.756	805.644	414.647	509.043	825.962	432.975	514.731	849.303	362.583	426.524	849.004	393.894	320.796	821.358	368.62
439	4.38	624.677	1336.98	143.942	660.386	1327.63	74.233	672.373	1340.03	205.181	741.543	1140.74	-11.623	775.782	1172.38	307.496	684.371	1125.38	160.329	743.204	778.273	-91.7585	475.165	837.046	-38.7604	497.01	842.426	34.2889	404.78	845.546	10.9193	305.752	821.889	4.6077	775.733	805.635	414.66	509.046	825.949	432.97	514.711	849.302	362.599	426.517	848.991	393.903	320.781	821.357	368.633
440	4.39	624.735	1336.97	143.95	660.399	1327.64	74.2319	672.396	1340.02	205.181	741.545	1140.7	-11.6407	775.809	1172.36	307.506	684.413	1125.38	160.309	743.223	778.239	-91.7588	475.178	837.016	-38.7654	497.005	842.4	34.2824	404.795	845.536	10.9292	305.799	821.871	4.62094	775.746	805.642	414.666	509.052	825.919	433	514.691	849.276	362.61	426.527	848.985	393.914	320.796	821.358	368.659
441	4.4	624.788	1336.94	143.937	660.436	1327.63	74.2321	672.404	1340.01	205.167	741.566	1140.65	-11.6446	775.809	1172.33	307.483	684.443	1125.4	160.321	743.248	778.201	-91.7444	475.171	837.008	-38.7578	497.028	842.383	34.288	404.836	845.53	10.9306	305.841	821.873	4.62235	775.733	805.654	414.669	509.069	825.919	433.008	514.737	849.287	362.629	426.542	848.981	393.913	320.817	821.341	368.658
442	4.41	624.846	1336.92	143.907	660.462	1327.65	74.2471	672.41	1340.01	205.155	741.589	1140.62	-11.6498	775.819	1172.33	307.467	684.306	1125.48	160.362	743.296	778.179	-91.7285	475.2	836.988	-38.7532	497.042	842.39	34.2923	404.854	845.548	10.9291	305.836	821.885	4.64215	775.735	805.66	414.676	509.09	825.948	433.01	514.711	849.294	362.619	426.549	848.99	393.921	320.834	821.345	368.658
443	4.42	624.74	1336.96	143.914	660.456	1327.68	74.2298	672.398	1340.01	205.149	741.597	1140.6	-11.6603	775.803	1172.33	307.479	684.188	1125.54	160.382	743.308	778.143	-91.7073	475.191	836.98	-38.7592	497.044	842.415	34.2781	404.849	845.587	10.9195	305.84	821.907	4.64207	775.769	805.657	414.686	509.075	825.951	433.011	514.683	849.295	362.63	426.545	849.014	393.924	320.829	821.355	368.653
444	4.43	624.599	1337	143.927	660.472	1327.66	74.2071	672.414	1340	205.143	741.603	1140.58	-11.6847	775.82	1172.34	307.457	684.24	1125.5	160.374	743.263	778.074	-91.7185	475.151	836.981	-38.7751	497.034	842.414	34.2758	404.861	845.585	10.899	305.816	821.927	4.63411	775.756	805.643	414.688	509.078	825.949	433.019	514.734	849.305	362.632	426.567	848.998	393.924	320.831	821.362	368.642
445	4.44	624.675	1336.96	143.935	660.523	1327.66	74.1963	672.45	1339.98	205.154	741.618	1140.54	-11.7137	775.85	1172.34	307.441	684.362	1125.43	160.346	743.291	778.04	-91.7221	475.161	836.973	-38.7788	497.068	842.397	34.2735	404.86	845.568	10.9111	305.834	821.909	4.64449	775.791	805.66	414.683	509.061	825.945	433.01	514.792	849.312	362.652	426.58	848.984	393.916	320.846	821.368	368.651
446	4.45	624.867	1336.91	143.919	660.56	1327.67	74.2097	672.471	1339.97	205.174	741.63	1140.5	-11.711	775.876	1172.32	307.453	684.468	1125.38	160.328	743.331	778.004	-91.7083	475.193	836.946	-38.766	497.086	842.375	34.2701	404.871	845.559	10.9217	305.858	821.89	4.65969	775.86	805.681	414.701	509.091	825.92	433.008	514.83	849.278	362.671	426.577	848.977	393.93	320.86	821.351	368.668
447	4.46	624.935	1336.88	143.912	660.562	1327.66	74.2348	672.454	1339.95	205.178	741.62	1140.46	-11.7096	775.873	1172.31	307.448	684.483	1125.32	160.332	743.316	777.988	-91.7017	475.211	836.917	-38.7839	497.056	842.373	34.2779	404.904	845.515	10.8939	305.863	821.884	4.6826	775.865	805.702	414.73	509.049	825.904	433.027	514.789	849.252	362.668	426.569	848.95	393.935	320.864	821.311	368.66
448	4.47	625.006	1336.84	143.893	660.596	1327.63	74.2146	672.507	1339.92	205.169	741.596	1140.42	-11.7314	775.871	1172.29	307.428	684.548	1125.28	160.321	743.301	777.968	-91.7179	475.236	836.875	-38.8167	497.058	842.376	34.2675	404.979	845.429	10.8041	305.874	821.853	4.70662	775.832	805.712	414.739	508.992	825.89	433.033	514.77	849.232	362.67	426.598	848.923	393.929	320.879	821.307	368.65
449	4.48	624.933	1336.85	143.907	660.654	1327.61	74.1817	672.53	1339.92	205.143	741.602	1140.39	-11.7496	775.877	1172.3	307.4	684.602	1125.25	160.308	743.338	777.936	-91.7458	475.248	836.888	-38.8495	497.132	842.4	34.2232	404.962	845.497	10.8228	305.877	821.834	4.76551	775.792	805.716	414.711	509.015	825.902	433.034	514.787	849.242	362.665	426.62	848.926	393.924	320.862	821.315	368.639
450	4.49	624.847	1336.88	143.865	660.63	1327.63	74.1716	672.507	1339.95	205.114	741.589	1140.37	-11.7608	775.905	1172.33	307.354	684.526	1125.31	160.308	743.354	777.917	-91.7665	475.248	836.942	-38.8732	497.149	842.45	34.1867	404.909	845.669	10.8768	305.876	821.847	4.8268	775.787	805.725	414.73	509.032	825.92	433.034	514.788	849.256	362.655	426.596	848.965	393.913	320.832	821.336	368.633
451	4.5	624.754	1336.97	143.826	660.576	1327.68	74.1648	672.488	1339.96	205.09	741.547	1140.35	-11.7818	775.972	1172.38	307.277	684.382	1125.36	160.32	743.348	777.888	-91.768	475.246	836.983	-38.8901	497.165	842.498	34.1637	404.951	845.71	10.787	305.886	821.881	4.81158	775.796	805.71	414.727	509.019	825.936	433.016	514.78	849.285	362.634	426.546	849.015	393.907	320.815	821.38	368.628
452	4.51	624.717	1337.02	143.817	660.601	1327.71	74.1374	672.482	1339.98	205.088	741.542	1140.34	-11.8054	775.985	1172.39	307.276	684.351	1125.41	160.31	743.357	777.856	-91.7795	475.258	837.024	-38.926	497.201	842.522	34.1305	404.983	845.632	10.6942	305.889	821.896	4.79803	775.797	805.705	414.715	509.033	825.96	433.012	514.78	849.311	362.618	426.542	849.039	393.916	320.814	821.392	368.62
453	4.52	624.76	1337.01	143.833	660.657	1327.71	74.1237	672.502	1339.99	205.086	741.572	1140.31	-11.8106	776	1172.37	307.308	684.388	1125.39	160.313	743.368	777.846	-91.7929	475.256	837.029	-38.9426	497.21	842.522	34.1269	405.04	845.611	10.6713	305.916	821.893	4.80467	775.803	805.695	414.712	509.084	825.993	433.02	514.802	849.298	362.627	426.587	849.035	393.927	320.838	821.376	368.63
454	4.53	624.846	1336.97	143.846	660.646	1327.71	74.1463	672.533	1339.96	205.099	741.584	1140.27	-11.816	776.023	1172.36	307.289	684.509	1125.35	160.329	743.396	777.842	-91.8073	475.256	837.011	-38.9347	497.228	842.513	34.1243	405.051	845.678	10.7155	305.947	821.86	4.82593	775.787	805.684	414.693	509.088	825.969	433.015	514.811	849.299	362.642	426.611	849.012	393.942	320.841	821.356	368.642
455	4.54	624.956	1336.92	143.817	660.649	1327.68	74.1486	672.52	1339.94	205.105	741.59	1140.22	-11.8162	776.004	1172.35	307.316	684.508	1125.34	160.338	743.383	777.815	-91.8416	475.254	836.979	-38.9408	497.2	842.469	34.1325	405.012	845.795	10.8073	305.947	821.838	4.82895	775.748	805.671	414.692	509.075	825.946	433.017	514.757	849.262	362.649	426.614	848.961	393.935	320.848	821.331	368.653
456	4.55	625.087	1336.86	143.832	660.672	1327.67	74.1476	672.537	1339.92	205.112	741.584	1140.19	-11.81	776.034	1172.34	307.263	684.584	1125.28	160.335	743.354	777.776	-91.8915	475.285	836.921	-38.9524	497.218	842.429	34.1136	405.022	845.732	10.8017	305.969	821.818	4.81678	775.75	805.67	414.698	509.064	825.923	433.011	514.7	849.214	362.639	426.601	848.936	393.936	320.893	821.311	368.656
457	4.56	625.039	1336.86	143.864	660.696	1327.67	74.1521	672.569	1339.91	205.123	741.587	1140.18	-11.8212	776.075	1172.32	307.244	684.709	1125.21	160.315	743.311	777.75	-91.9292	475.296	836.898	-38.959	497.256	842.422	34.1085	405.078	845.574	10.7323	305.99	821.81	4.84177	775.779	805.686	414.68	509.061	825.909	433.013	514.736	849.197	362.654	426.585	848.933	393.95	320.905	821.312	368.665
458	4.57	624.895	1336.89	143.882	660.661	1327.67	74.1757	672.542	1339.91	205.12	741.59	1140.17	-11.8518	776.06	1172.33	307.226	684.627	1125.22	160.335	743.316	777.738	-91.9449	475.27	836.92	-38.9453	497.232	842.44	34.105	405.094	845.545	10.7212	305.976	821.829	4.86802	775.778	805.681	414.668	509.042	825.89	433.012	514.751	849.177	362.654	426.572	848.943	393.95	320.883	821.324	368.672
459	4.58	624.903	1336.92	143.825	660.643	1327.7	74.1604	672.524	1339.91	205.107	741.592	1140.16	-11.88	776.048	1172.34	307.2	684.571	1125.24	160.324	743.328	777.729	-91.9561	475.294	836.927	-38.9763	497.211	842.458	34.0879	405.09	845.639	10.7351	305.968	821.855	4.85125	775.793	805.681	414.67	509.04	825.898	433.019	514.74	849.185	362.637	426.568	848.971	393.94	320.849	821.346	368.651
460	4.59	624.991	1336.95	143.772	660.684	1327.75	74.1291	672.536	1339.91	205.073	741.588	1140.14	-11.9165	776.079	1172.35	307.192	684.593	1125.27	160.302	743.334	777.719	-91.9752	475.314	836.936	-39.0188	497.254	842.474	34.0381	405.058	845.764	10.7505	305.982	821.887	4.8326	775.809	805.692	414.671	509.08	825.932	433.022	514.83	849.24	362.656	426.571	848.998	393.92	320.845	821.369	368.628
461	4.6	625.003	1336.96	143.766	660.684	1327.78	74.1244	672.524	1339.91	205.071	741.581	1140.12	-11.9522	776.114	1172.37	307.163	684.463	1125.31	160.286	743.364	777.701	-91.9784	475.305	836.964	-39.0229	497.304	842.459	33.9963	405.125	845.645	10.6563	305.978	821.91	4.84342	775.829	805.706	414.671	509.079	825.958	433.027	514.839	849.271	362.637	426.567	849.016	393.908	320.834	821.37	368.616
462	4.61	624.937	1337.02	143.789	660.641	1327.8	74.131	672.51	1339.89	205.07	741.547	1140.08	-11.9755	776.127	1172.36	307.138	684.43	1125.31	160.296	743.369	777.648	-91.9733	475.296	836.971	-39.0178	497.283	842.463	34.0139	405.125	845.622	10.6406	305.958	821.913	4.85872	775.81	805.704	414.669	509.094	825.952	433.017	514.778	849.237	362.611	426.562	849.018	393.912	320.838	821.381	368.623
463	4.62	624.933	1337.04	143.798	660.627	1327.84	74.1282	672.506	1339.88	205.08	741.509	1140.02	-11.986	776.138	1172.36	307.12	684.503	1125.27	160.264	743.389	777.593	-91.9779	475.307	836.952	-39.0177	497.247	842.45	34.0247	405.12	845.62	10.6539	305.969	821.91	4.86171	775.791	805.707	414.669	509.132	825.929	433.03	514.741	849.213	362.633	426.58	849.005	393.929	320.848	821.387	368.627
464	4.63	625.044	1336.96	143.768	660.654	1327.82	74.1212	672.531	1339.85	205.094	741.482	1139.93	-12.0123	776.155	1172.38	307.099	684.514	1125.26	160.287	743.39	777.531	-91.9853	475.324	836.914	-39.0197	497.239	842.418	34.0486	405.102	845.604	10.6856	305.995	821.886	4.86086	775.8	805.728	414.677	509.132	825.92	433.051	514.8	849.209	362.657	426.597	848.965	393.927	320.871	821.354	368.626
465	4.64	625.123	1336.91	143.7	660.73	1327.78	74.0587	672.587	1339.88	205.09	741.449	1139.85	-12.0441	776.213	1172.38	307.05	684.488	1125.27	160.273	743.388	777.472	-91.9942	475.372	836.863	-39.0487	497.251	842.408	34.05	405.115	845.583	10.7014	306.022	821.874	4.86669	775.828	805.752	414.68	509.135	825.927	433.052	514.839	849.218	362.657	426.62	848.933	393.914	320.894	821.304	368.625
466	4.65	625.067	1336.94	143.665	660.772	1327.78	74.0001	672.685	1340	205.104	741.434	1139.79	-12.0877	776.237	1172.39	307.022	684.358	1125.29	160.26	743.401	777.426	-91.9913	475.403	836.822	-39.0703	497.274	842.39	34.0306	405.153	845.589	10.6945	306.03	821.865	4.86062	775.841	805.798	414.708	509.16	825.927	433.038	514.854	849.229	362.634	426.644	848.937	393.892	320.902	821.286	368.591
467	4.66	625.004	1337	143.639	660.732	1327.81	73.979	672.643	1339.99	205.062	741.403	1139.76	-12.0991	776.252	1172.43	306.998	684.335	1125.33	160.256	743.395	777.375	-91.9791	475.398	836.823	-39.0587	497.282	842.387	34.0139	405.18	845.591	10.6643	306.008	821.86	4.85794	775.845	805.835	414.737	509.153	825.922	433.035	514.83	849.244	362.642	426.659	848.957	393.906	320.897	821.299	368.581
468	4.67	624.953	1337.08	143.638	660.663	1327.85	73.9899	672.544	1339.92	205.015	741.387	1139.74	-12.0974	776.23	1172.44	306.987	684.452	1125.3	160.26	743.373	777.353	-91.9692	475.373	836.834	-39.01	497.294	842.389	34.006	405.142	845.595	10.6901	305.98	821.868	4.9013	775.816	805.874	414.766	509.13	825.938	433.042	514.813	849.251	362.673	426.627	848.997	393.936	320.894	821.353	368.621
469	4.68	624.914	1337.09	143.654	660.643	1327.86	73.9742	672.519	1339.93	204.989	741.374	1139.73	-12.0953	776.239	1172.43	306.978	684.504	1125.27	160.276	743.392	777.374	-91.9706	475.347	836.835	-38.9817	497.308	842.373	34.0249	405.168	845.577	10.7201	306.009	821.872	4.91427	775.8	805.911	414.778	509.111	825.954	433.051	514.771	849.261	362.679	426.596	849.02	393.958	320.882	821.382	368.64
470	4.69	625.055	1337.04	143.593	660.675	1327.83	73.9292	672.527	1339.94	204.963	741.369	1139.68	-12.1143	776.212	1172.42	306.981	684.552	1125.22	160.283	743.41	777.374	-91.9836	475.381	836.81	-38.9908	497.294	842.319	34.0379	405.171	845.544	10.7371	306.047	821.849	4.90516	775.767	805.926	414.771	509.079	825.948	433.066	514.745	849.26	362.671	426.592	849.018	393.961	320.874	821.382	368.637
471	4.7	625.182	1336.99	143.531	660.713	1327.8	73.902	672.532	1339.94	204.941	741.324	1139.63	-12.1346	776.218	1172.42	306.999	684.508	1125.19	160.296	743.375	777.319	-91.9803	475.408	836.769	-38.9989	497.273	842.293	34.0573	405.184	845.525	10.7175	306.02	821.84	4.91802	775.731	805.944	414.771	509.042	825.936	433.074	514.772	849.257	362.69	426.596	849.014	393.969	320.884	821.381	368.636
472	4.71	625.138	1336.99	143.505	660.708	1327.76	73.8609	672.504	1339.91	204.896	741.296	1139.58	-12.1406	776.274	1172.42	307.002	684.534	1125.18	160.299	743.329	777.27	-91.9617	475.403	836.749	-38.9892	497.289	842.292	34.0664	405.179	845.592	10.7531	306.004	821.849	4.95323	775.764	805.967	414.798	509.058	825.938	433.087	514.766	849.249	362.702	426.564	849.005	393.975	320.882	821.356	368.632
473	4.72	625.2	1337	143.435	660.765	1327.72	73.7884	672.527	1339.9	204.823	741.334	1139.53	-12.1909	776.354	1172.44	306.951	684.657	1125.17	160.261	743.306	777.195	-91.9596	475.413	836.734	-39.0169	497.335	842.272	34.0343	405.193	845.687	10.7813	306.037	821.854	4.94067	775.804	805.953	414.793	509.083	825.958	433.07	514.797	849.235	362.68	426.565	848.993	393.946	320.872	821.347	368.623
474	4.73	625.339	1336.99	143.301	660.831	1327.68	73.6868	672.563	1339.89	204.761	741.36	1139.46	-12.2434	776.373	1172.44	306.906	684.52	1125.22	160.269	743.315	777.131	-91.9818	475.428	836.738	-39.088	497.3	842.275	34.0335	405.155	845.678	10.7434	306.062	821.862	4.88035	775.802	805.933	414.778	509.095	825.993	433.05	514.794	849.257	362.649	426.598	848.98	393.913	320.878	821.334	368.588
475	4.74	625.313	1337.02	143.229	660.851	1327.68	73.621	672.566	1339.9	204.712	741.364	1139.4	-12.2707	776.4	1172.44	306.872	684.427	1125.25	160.276	743.288	777.056	-91.9733	475.434	836.751	-39.1022	497.301	842.285	34.0278	405.084	845.836	10.7845	306.029	821.883	4.85754	775.818	805.914	414.783	509.111	825.987	433.035	514.808	849.286	362.631	426.608	848.993	393.887	320.863	821.339	368.58
476	4.75	625.324	1337.05	143.199	660.889	1327.7	73.5971	672.59	1339.91	204.699	741.366	1139.34	-12.2831	776.466	1172.48	306.874	684.456	1125.24	160.27	743.302	777.003	-91.9417	475.423	836.764	-39.0689	497.295	842.305	34.039	405.14	845.792	10.7568	306.006	821.899	4.88763	775.85	805.93	414.786	509.147	825.961	433.048	514.817	849.263	362.65	426.613	849.014	393.897	320.864	821.368	368.615
477	4.76	625.41	1337.06	143.151	660.994	1327.74	73.5593	672.651	1339.92	204.672	741.394	1139.29	-12.3095	776.535	1172.46	306.846	684.53	1125.2	160.255	743.304	776.952	-91.9264	475.438	836.765	-39.0456	497.323	842.285	34.0366	405.192	845.64	10.7228	306.026	821.905	4.90091	775.851	805.951	414.778	509.216	825.956	433.056	514.863	849.234	362.662	426.635	849.013	393.91	320.894	821.376	368.638
478	4.77	625.612	1337.06	143.108	661.097	1327.75	73.5323	672.717	1339.91	204.626	741.44	1139.24	-12.3307	776.623	1172.46	306.813	684.641	1125.17	160.232	743.332	776.909	-91.922	475.452	836.746	-39.0353	497.324	842.243	34.0362	405.209	845.579	10.7278	306.04	821.894	4.91742	775.862	805.958	414.779	509.214	825.948	433.047	514.902	849.219	362.665	426.644	848.997	393.926	320.926	821.377	368.65
479	4.78	625.752	1337.05	143.057	661.155	1327.76	73.5026	672.793	1339.93	204.586	741.421	1139.18	-12.3614	776.647	1172.47	306.803	684.695	1125.13	160.218	743.321	776.864	-91.9048	475.44	836.724	-39.016	497.267	842.214	34.0647	405.214	845.548	10.7548	306.042	821.891	4.92221	775.866	805.996	414.812	509.144	825.944	433.068	514.898	849.212	362.686	426.641	849	393.94	320.966	821.372	368.674
480	4.79	625.847	1337.07	143.012	661.192	1327.77	73.4835	672.838	1339.97	204.536	741.42	1139.12	-12.3896	776.609	1172.48	306.802	684.725	1125.12	160.229	743.303	776.82	-91.8636	475.474	836.694	-38.9966	497.263	842.21	34.0853	405.218	845.529	10.7763	306.036	821.88	4.93167	775.843	806.041	414.834	509.106	825.938	433.069	514.876	849.224	362.69	426.64	849.002	393.951	320.986	821.373	368.676
481	4.8	625.96	1337.11	142.922	661.266	1327.81	73.4421	672.86	1339.99	204.457	741.422	1139.08	-12.4276	776.641	1172.48	306.754	684.697	1125.17	160.232	743.309	776.765	-91.8492	475.516	836.675	-38.9939	497.288	842.189	34.0895	405.229	845.526	10.7777	306.067	821.868	4.93647	775.826	806.086	414.854	509.101	825.952	433.056	514.827	849.235	362.679	426.629	849.009	393.952	320.954	821.395	368.67
482	4.81	625.976	1337.17	142.822	661.332	1327.85	73.3736	672.844	1340.01	204.347	741.393	1139.03	-12.4863	776.698	1172.51	306.714	684.61	1125.19	160.23	743.269	776.666	-91.8422	475.514	836.661	-39.0086	497.298	842.188	34.0621	405.215	845.557	10.7468	306.041	821.886	4.91795	775.818	806.128	414.866	509.124	825.984	433.063	514.809	849.258	362.666	426.593	849.039	393.94	320.884	821.413	368.633
483	4.82	625.96	1337.24	142.768	661.387	1327.87	73.294	672.886	1340.06	204.277	741.363	1138.95	-12.5411	776.727	1172.53	306.691	684.549	1125.23	160.246	743.219	776.581	-91.8212	475.516	836.644	-39.0157	497.264	842.195	34.0785	405.164	845.573	10.7338	306.021	821.907	4.9078	775.798	806.156	414.883	509.126	826.019	433.081	514.791	849.285	362.657	426.588	849.03	393.925	320.841	821.389	368.586
484	4.83	626.044	1337.29	142.705	661.461	1327.87	73.2424	672.997	1340.08	204.183	741.366	1138.85	-12.5852	776.759	1172.56	306.668	684.612	1125.23	160.19	743.234	776.506	-91.8082	475.56	836.602	-39.0265	497.268	842.183	34.0898	405.19	845.647	10.7407	306.044	821.9	4.90663	775.823	806.175	414.909	509.142	826.021	433.099	514.811	849.287	362.683	426.617	849.002	393.908	320.879	821.343	368.573
485	4.84	626.132	1337.31	142.637	661.566	1327.87	73.219	673.111	1340.09	204.086	741.377	1138.75	-12.6501	776.801	1172.56	306.635	684.771	1125.21	160.155	743.209	776.379	-91.7923	475.586	836.564	-39.0291	497.351	842.125	34.0778	405.235	845.714	10.8123	306.054	821.901	4.89895	775.869	806.198	414.912	509.156	826.009	433.099	514.863	849.289	362.696	426.665	848.98	393.913	320.943	821.319	368.582
486	4.85	626.138	1337.38	142.577	661.653	1327.89	73.1831	673.177	1340.11	204.006	741.363	1138.65	-12.7143	776.847	1172.56	306.607	684.745	1125.23	160.161	743.173	776.258	-91.7862	475.598	836.525	-39.0434	497.348	842.089	34.0672	405.294	845.574	10.7666	306.037	821.901	4.90925	775.859	806.202	414.921	509.171	825.994	433.104	514.852	849.27	362.697	426.677	848.962	393.914	320.953	821.32	368.583
487	4.86	626.167	1337.48	142.529	661.688	1327.92	73.1306	673.244	1340.15	203.929	741.355	1138.57	-12.7667	776.86	1172.56	306.577	684.69	1125.22	160.157	743.187	776.172	-91.7608	475.587	836.515	-39.0344	497.324	842.067	34.0766	405.307	845.535	10.7428	306.061	821.889	4.88117	775.84	806.195	414.942	509.164	825.987	433.122	514.835	849.243	362.695	426.662	848.97	393.921	320.956	821.34	368.602
488	4.87	626.18	1337.56	142.473	661.742	1327.97	73.1049	673.377	1340.21	203.855	741.353	1138.49	-12.819	776.926	1172.57	306.539	684.623	1125.25	160.161	743.211	776.078	-91.7166	475.611	836.524	-39.0303	497.321	842.069	34.0885	405.311	845.529	10.7394	306.04	821.905	4.88577	775.846	806.195	414.958	509.182	825.983	433.137	514.864	849.254	362.71	426.682	848.996	393.938	320.935	821.374	368.612
489	4.88	626.185	1337.63	142.409	661.781	1328	73.0642	673.424	1340.24	203.767	741.321	1138.41	-12.8787	776.959	1172.59	306.507	684.694	1125.23	160.102	743.189	775.967	-91.68	475.608	836.502	-39.0409	497.375	842.063	34.0527	405.299	845.527	10.7281	306.049	821.914	4.87895	775.861	806.217	414.944	509.193	825.982	433.117	514.876	849.257	362.702	426.68	849.01	393.933	320.932	821.384	368.603
490	4.89	626.246	1337.64	142.296	661.801	1328.02	73.0032	673.475	1340.27	203.643	741.247	1138.31	-12.9797	776.949	1172.62	306.469	684.675	1125.22	160.071	743.111	775.849	-91.6892	475.597	836.484	-39.0616	497.373	842.042	34.0188	405.269	845.531	10.7114	306.054	821.924	4.84838	775.84	806.229	414.938	509.171	825.995	433.088	514.87	849.255	362.664	426.673	849.017	393.919	320.931	821.385	368.572
491	4.9	626.33	1337.63	142.22	661.861	1328.02	72.9439	673.58	1340.31	203.555	741.218	1138.24	-13.0344	776.935	1172.62	306.449	684.688	1125.2	160.055	743.13	775.781	-91.6827	475.621	836.463	-39.0825	497.351	842.014	34.0278	405.255	845.542	10.724	306.07	821.933	4.85194	775.827	806.27	414.946	509.145	826.007	433.091	514.861	849.263	362.66	426.667	849.018	393.908	320.946	821.383	368.566
492	4.91	626.485	1337.61	142.192	661.942	1328.02	72.9358	673.668	1340.36	203.506	741.227	1138.16	-13.0668	776.939	1172.6	306.417	684.686	1125.22	160.1	743.107	775.7	-91.6603	475.629	836.435	-39.0368	497.317	842.007	34.0828	405.316	845.527	10.7586	306.095	821.917	4.90275	775.839	806.312	414.959	509.177	825.996	433.126	514.902	849.273	362.712	426.659	849.017	393.922	320.945	821.401	368.6
493	4.92	626.58	1337.63	142.165	661.975	1328.01	72.9239	673.729	1340.39	203.443	741.21	1138.09	-13.1189	776.937	1172.61	306.401	684.772	1125.19	160.086	743.034	775.617	-91.6697	475.639	836.419	-39.0034	497.322	842.01	34.1011	405.286	845.519	10.7752	306.055	821.912	4.94981	775.862	806.351	414.968	509.178	826.002	433.136	514.925	849.261	362.722	426.651	849.011	393.936	320.944	821.406	368.627
494	4.93	626.592	1337.63	142.091	662.015	1327.99	72.834	673.825	1340.42	203.346	741.165	1138.03	-13.1962	776.96	1172.63	306.378	684.822	1125.15	160.055	743.042	775.591	-91.6725	475.625	836.407	-39.0382	497.307	842.007	34.0711	405.29	845.519	10.75	306.05	821.909	4.91403	775.832	806.369	414.95	509.142	826.014	433.122	514.894	849.244	362.704	426.64	849.005	393.918	320.937	821.39	368.598
495	4.94	626.552	1337.65	142.002	662.096	1327.97	72.7276	673.89	1340.49	203.25	741.155	1137.98	-13.2645	776.986	1172.64	306.333	684.822	1125.18	160.034	743.096	775.576	-91.686	475.647	836.399	-39.0737	497.345	842.004	34.0372	405.282	845.523	10.7712	306.092	821.913	4.88702	775.813	806.372	414.944	509.127	826.031	433.11	514.82	849.245	362.678	426.657	848.998	393.9	320.921	821.363	368.568
496	4.95	626.518	1337.67	141.936	662.088	1327.99	72.677	673.903	1340.51	203.183	741.144	1137.95	-13.2941	777.029	1172.65	306.326	684.673	1125.27	160.046	743.06	775.521	-91.6876	475.65	836.4	-39.0593	497.35	842.006	34.0508	405.27	845.538	10.7816	306.056	821.913	4.9156	775.838	806.385	414.944	509.142	826.043	433.128	514.791	849.253	362.677	426.662	848.999	393.902	320.919	821.362	368.58
497	4.96	626.406	1337.69	141.897	662.086	1328	72.6148	673.917	1340.51	203.132	741.124	1137.93	-13.329	777.069	1172.67	306.312	684.593	1125.3	160.028	743.02	775.463	-91.6772	475.625	836.415	-39.0328	497.343	842.019	34.0586	405.235	845.541	10.7811	305.988	821.922	4.94412	775.827	806.383	414.943	509.151	826.03	433.114	514.816	849.25	362.67	426.638	849.003	393.907	320.897	821.388	368.585
498	4.97	626.38	1337.7	141.778	662.138	1327.98	72.5108	673.969	1340.54	203.049	741.123	1137.91	-13.3869	777.072	1172.69	306.273	684.399	1125.37	160.008	743.033	775.453	-91.7082	475.615	836.391	-39.0646	497.327	842.012	34.0422	405.203	845.549	10.7396	305.996	821.932	4.89103	775.81	806.362	414.913	509.145	826.017	433.084	514.793	849.273	362.643	426.667	848.988	393.88	320.921	821.373	368.568
499	4.98	626.426	1337.66	141.678	662.235	1327.95	72.3963	673.964	1340.55	202.97	741.121	1137.9	-13.4295	777.064	1172.7	306.256	684.406	1125.35	160.004	743.039	775.447	-91.7528	475.618	836.363	-39.0818	497.311	841.998	34.0271	405.215	845.531	10.7475	306.02	821.916	4.87687	775.824	806.352	414.89	509.154	826.026	433.096	514.797	849.282	362.627	426.692	848.971	393.865	320.929	821.344	368.558
500	4.99	626.466	1337.67	141.63	662.271	1327.94	72.3642	673.998	1340.57	202.932	741.124	1137.88	-13.4374	777.063	1172.7	306.246	684.616	1125.31	159.98	743.008	775.423	-91.7602	475.649	836.349	-39.0774	497.339	841.979	34.0273	405.232	845.515	10.7821	306.031	821.902	4.90664	775.836	806.352	414.871	509.178	826.044	433.097	514.838	849.282	362.639	426.687	848.985	393.889	320.952	821.341	368.581
501	5	626.461	1337.72	141.615	662.298	1327.95	72.3385	674.039	1340.62	202.896	741.113	1137.88	-13.4518	777.054	1172.67	306.242	684.631	1125.33	159.998	743.015	775.428	-91.7593	475.611	836.37	-39.0611	497.339	841.966	34.0401	405.282	845.568	10.8078	306.036	821.906	4.93545	775.851	806.372	414.85	509.195	826.054	433.1	514.844	849.276	362.656	426.669	849.016	393.919	320.945	821.365	368.609
502	5.01	626.466	1337.75	141.546	662.311	1327.97	72.2917	674.084	1340.64	202.847	741.098	1137.87	-13.4791	777.033	1172.66	306.242	684.733	1125.29	159.937	743.037	775.433	-91.7852	475.569	836.371	-39.0709	497.367	841.951	34.0137	405.278	845.639	10.8202	306.036	821.918	4.92371	775.783	806.357	414.82	509.202	826.047	433.095	514.8	849.242	362.632	426.664	849.026	393.926	320.947	821.399	368.607
503	5.02	626.496	1337.76	141.479	662.327	1327.98	72.2257	674.132	1340.64	202.802	741.102	1137.85	-13.5033	776.992	1172.63	306.293	684.732	1125.3	159.92	743.022	775.405	-91.7937	475.589	836.354	-39.1013	497.38	841.918	33.9834	405.315	845.516	10.7524	306.042	821.921	4.9052	775.762	806.348	414.806	509.179	826.047	433.061	514.806	849.239	362.621	426.655	849.017	393.918	320.937	821.411	368.603
504	5.03	626.532	1337.73	141.426	662.395	1327.95	72.1618	674.155	1340.66	202.764	741.086	1137.83	-13.5214	777.064	1172.64	306.254	684.78	1125.3	159.904	743.024	775.384	-91.8037	475.619	836.327	-39.1002	497.394	841.908	33.9778	405.309	845.496	10.7333	306.059	821.914	4.89941	775.82	806.377	414.796	509.151	826.038	433.039	514.842	849.245	362.616	426.653	849.007	393.904	320.949	821.394	368.594
505	5.04	626.515	1337.71	141.376	662.438	1327.93	72.1032	674.183	1340.67	202.737	741.084	1137.81	-13.5629	777.105	1172.67	306.22	684.716	1125.29	159.911	743.059	775.354	-91.8442	475.623	836.316	-39.1144	497.385	841.907	33.9828	405.288	845.495	10.7225	306.069	821.896	4.89447	775.798	806.353	414.772	509.156	826.038	433.035	514.828	849.246	362.58	426.663	849	393.892	320.921	821.374	368.584
506	5.05	626.476	1337.72	141.334	662.428	1327.93	72.0777	674.208	1340.67	202.705	741.075	1137.8	-13.5952	777.094	1172.67	306.202	684.674	1125.31	159.922	743.035	775.291	-91.8913	475.616	836.286	-39.1317	497.314	841.922	33.9978	405.26	845.511	10.7337	306.036	821.896	4.88649	775.765	806.322	414.744	509.136	826.029	433.033	514.794	849.236	362.561	426.649	848.991	393.87	320.904	821.336	368.564
507	5.06	626.514	1337.7	141.302	662.444	1327.93	72.0329	674.223	1340.68	202.698	741.083	1137.79	-13.603	777.061	1172.67	306.179	684.721	1125.3	159.899	742.985	775.225	-91.8948	475.629	836.251	-39.1573	497.317	841.928	33.9828	405.237	845.496	10.7459	306.029	821.883	4.88265	775.761	806.306	414.739	509.158	826.041	433.029	514.82	849.219	362.574	426.64	848.973	393.866	320.93	821.302	368.565
508	5.07	626.518	1337.71	141.297	662.482	1327.94	72.0135	674.264	1340.68	202.696	741.097	1137.78	-13.5962	777.059	1172.68	306.176	684.665	1125.33	159.906	743.048	775.243	-91.8758	475.657	836.231	-39.1319	497.382	841.924	33.954	405.263	845.571	10.7712	306.045	821.89	4.89236	775.8	806.33	414.752	509.189	826.038	433.028	514.866	849.229	362.6	426.659	848.968	393.869	320.976	821.304	368.587
509	5.08	626.514	1337.75	141.287	662.487	1327.95	72.012	674.234	1340.67	202.681	741.083	1137.79	-13.5985	777.059	1172.7	306.254	684.655	1125.31	159.929	743.048	775.266	-91.8229	475.672	836.238	-39.1149	497.373	841.919	33.9662	405.229	845.678	10.8057	306.039	821.903	4.90235	775.835	806.36	414.763	509.157	826.033	433.035	514.881	849.239	362.6	426.663	848.981	393.885	320.978	821.328	368.599
510	5.09	626.492	1337.79	141.277	662.464	1327.97	72.0253	674.208	1340.68	202.661	741.053	1137.8	-13.6028	777.043	1172.68	306.297	684.66	1125.31	159.898	743.032	775.285	-91.7801	475.637	836.265	-39.1102	497.315	841.93	33.9961	405.213	845.645	10.7969	306.005	821.934	4.9312	775.838	806.367	414.761	509.168	826.03	433.039	514.92	849.263	362.607	426.67	849.003	393.894	320.954	821.373	368.607
511	5.1	626.529	1337.81	141.271	662.482	1328	71.9987	674.223	1340.71	202.65	741.016	1137.81	-13.5986	777.035	1172.7	306.249	684.575	1125.38	159.914	743.031	775.294	-91.7656	475.638	836.268	-39.102	497.32	841.923	33.9974	405.211	845.692	10.8147	305.979	821.958	4.93077	775.822	806.367	414.769	509.18	826.025	433.033	514.852	849.264	362.593	426.663	849.018	393.903	320.945	821.38	368.626
512	5.11	626.592	1337.82	141.235	662.503	1328	71.9745	674.245	1340.74	202.631	740.99	1137.82	-13.6084	776.975	1172.7	306.278	684.577	1125.42	159.921	743.063	775.275	-91.7772	475.666	836.257	-39.1061	497.333	841.925	33.9847	405.271	845.572	10.7486	306.016	821.954	4.90483	775.816	806.383	414.779	509.165	826.029	433.029	514.814	849.26	362.597	426.657	849.019	393.9	320.929	821.365	368.623
513	5.12	626.551	1337.81	141.214	662.517	1327.97	71.9478	674.261	1340.75	202.613	740.964	1137.82	-13.6027	776.995	1172.71	306.23	684.659	1125.38	159.897	743.076	775.277	-91.7901	475.668	836.236	-39.1029	497.308	841.931	33.979	405.277	845.531	10.739	305.996	821.948	4.89484	775.815	806.395	414.772	509.136	826.028	433.027	514.8	849.246	362.573	426.631	849.015	393.89	320.934	821.36	368.603
514	5.13	626.562	1337.77	141.194	662.513	1327.95	71.9278	674.258	1340.73	202.594	740.912	1137.83	-13.6066	777.016	1172.71	306.217	684.618	1125.38	159.941	743.064	775.298	-91.8047	475.625	836.208	-39.1075	497.304	841.915	33.9794	405.227	845.508	10.7376	305.979	821.923	4.88821	775.8	806.399	414.762	509.143	826.025	433.008	514.806	849.214	362.57	426.614	849	393.883	320.903	821.35	368.58
515	5.14	626.584	1337.76	141.184	662.562	1327.94	71.9082	674.281	1340.74	202.592	740.892	1137.83	-13.6122	777.023	1172.71	306.207	684.655	1125.38	159.931	743.075	775.318	-91.8285	475.635	836.186	-39.1223	497.314	841.895	33.9903	405.24	845.493	10.7416	306.025	821.914	4.88775	775.801	806.402	414.792	509.143	826.021	433.001	514.841	849.209	362.588	426.631	848.987	393.876	320.898	821.355	368.588
516	5.15	626.631	1337.78	141.195	662.604	1327.93	71.9088	674.296	1340.77	202.599	740.871	1137.85	-13.6077	777.039	1172.73	306.215	684.732	1125.39	159.922	743.075	775.331	-91.8276	475.678	836.166	-39.1058	497.337	841.894	33.994	405.278	845.484	10.7468	306.053	821.912	4.90171	775.807	806.401	414.797	509.182	826.038	433.023	514.873	849.249	362.615	426.643	848.994	393.881	320.91	821.368	368.608
517	5.16	626.581	1337.82	141.221	662.588	1327.93	71.9141	674.301	1340.79	202.599	740.835	1137.86	-13.5887	777.057	1172.75	306.223	684.701	1125.45	159.925	743.005	775.319	-91.823	475.66	836.189	-39.0892	497.308	841.905	34.0026	405.275	845.547	10.768	306.031	821.922	4.92976	775.786	806.41	414.787	509.2	826.052	433.035	514.868	849.275	362.592	426.64	849.016	393.88	320.921	821.388	368.634
518	5.17	626.624	1337.83	141.2	662.591	1327.94	71.8969	674.328	1340.79	202.588	740.823	1137.88	-13.5901	777.042	1172.74	306.229	684.676	1125.48	159.941	743.017	775.348	-91.83	475.623	836.222	-39.1019	497.329	841.926	33.9923	405.237	845.636	10.7978	306.048	821.919	4.91227	775.719	806.397	414.771	509.173	826.064	433.025	514.815	849.257	362.555	426.637	849.02	393.878	320.922	821.396	368.626
519	5.18	626.652	1337.81	141.166	662.597	1327.93	71.8662	674.362	1340.78	202.579	740.808	1137.9	-13.5989	777.042	1172.73	306.253	684.839	1125.43	159.932	743.035	775.393	-91.8528	475.603	836.252	-39.118	497.351	841.945	33.9785	405.225	845.552	10.7484	306.039	821.909	4.88052	775.736	806.386	414.761	509.212	826.063	433.01	514.793	849.251	362.549	426.662	849.009	393.873	320.926	821.383	368.598
520	5.19	626.645	1337.8	141.159	662.602	1327.9	71.8804	674.413	1340.78	202.572	740.779	1137.89	-13.5916	777.086	1172.75	306.266	684.829	1125.42	159.933	742.998	775.374	-91.8613	475.596	836.238	-39.1171	497.341	841.936	33.971	405.258	845.505	10.7436	306.004	821.918	4.88154	775.763	806.369	414.76	509.206	826.049	433.005	514.821	849.251	362.58	426.684	848.977	393.866	320.927	821.365	368.596
521	5.2	626.651	1337.8	141.161	662.589	1327.9	71.9121	674.411	1340.77	202.567	740.75	1137.89	-13.562	777.109	1172.77	306.272	684.708	1125.46	159.964	742.955	775.367	-91.8726	475.582	836.246	-39.1025	497.272	841.935	34.0117	405.285	845.486	10.7347	305.987	821.914	4.90712	775.803	806.368	414.745	509.195	826.046	433.018	514.837	849.215	362.568	426.695	848.971	393.874	320.954	821.35	368.598
522	5.21	626.594	1337.8	141.184	662.585	1327.88	71.9258	674.385	1340.76	202.565	740.712	1137.9	-13.5479	777.101	1172.76	306.283	684.603	1125.55	160.011	742.934	775.387	-91.8819	475.563	836.267	-39.1092	497.246	841.956	34.0309	405.277	845.501	10.7297	305.962	821.906	4.92836	775.81	806.367	414.741	509.192	826.047	433.008	514.79	849.211	362.551	426.694	848.98	393.879	320.966	821.335	368.589
523	5.22	626.597	1337.78	141.182	662.586	1327.88	71.9383	674.398	1340.77	202.585	740.683	1137.92	-13.5457	777.081	1172.75	306.289	684.708	1125.52	160.011	742.956	775.432	-91.8999	475.547	836.272	-39.09	497.282	841.961	33.9916	405.26	845.517	10.7205	305.968	821.91	4.92146	775.818	806.372	414.756	509.173	826.027	433	514.792	849.236	362.558	426.679	848.999	393.874	320.948	821.339	368.597
524	5.23	626.604	1337.76	141.183	662.588	1327.88	71.9449	674.395	1340.77	202.606	740.665	1137.94	-13.5309	777.113	1172.76	306.295	684.903	1125.45	159.988	742.975	775.471	-91.9016	475.569	836.275	-39.0999	497.286	841.967	33.9821	405.252	845.523	10.7243	305.976	821.901	4.92891	775.841	806.396	414.774	509.182	826.01	432.997	514.858	849.222	362.581	426.669	849.004	393.881	320.937	821.36	368.607
525	5.24	626.589	1337.74	141.212	662.591	1327.88	71.9558	674.41	1340.76	202.61	740.649	1137.97	-13.505	777.153	1172.77	306.314	684.904	1125.48	160.021	742.975	775.51	-91.9039	475.566	836.271	-39.0966	497.298	841.962	34.0005	405.244	845.519	10.7487	305.977	821.909	4.95552	775.821	806.393	414.747	509.166	826.025	432.998	514.852	849.235	362.576	426.686	849.005	393.89	320.922	821.368	368.592
526	5.25	626.594	1337.75	141.251	662.577	1327.88	71.9755	674.416	1340.77	202.64	740.608	1138.01	-13.491	777.147	1172.78	306.315	684.723	1125.56	160.104	742.934	775.544	-91.9591	475.541	836.293	-39.0951	497.275	841.982	34.0198	405.246	845.521	10.7743	305.949	821.924	4.97616	775.812	806.397	414.734	509.159	826.042	433.004	514.81	849.249	362.564	426.672	849.019	393.893	320.922	821.382	368.582
527	5.26	626.626	1337.76	141.276	662.583	1327.88	71.9929	674.349	1340.76	202.643	740.561	1138.04	-13.4857	777.117	1172.77	306.343	684.707	1125.64	160.086	742.909	775.583	-92.0201	475.501	836.307	-39.0913	497.26	841.989	33.9984	405.215	845.522	10.7748	305.962	821.927	4.95924	775.783	806.392	414.732	509.141	826.046	433.008	514.78	849.254	362.564	426.641	849.015	393.899	320.902	821.385	368.586
528	5.27	626.657	1337.73	141.294	662.595	1327.86	72.009	674.327	1340.76	202.668	740.527	1138.06	-13.4945	777.123	1172.77	306.376	684.769	1125.63	160.07	742.853	775.599	-92.0552	475.542	836.292	-39.1031	497.263	841.982	34.0012	405.234	845.514	10.7627	305.99	821.921	4.95211	775.775	806.396	414.736	509.133	826.044	433.004	514.772	849.25	362.57	426.625	849.013	393.89	320.905	821.375	368.588
529	5.28	626.669	1337.74	141.307	662.6	1327.84	72.0394	674.331	1340.76	202.684	740.511	1138.07	-13.485	777.122	1172.76	306.388	684.793	1125.65	160.06	742.857	775.615	-92.0761	475.53	836.291	-39.1079	497.268	841.982	34.0017	405.226	845.506	10.7496	305.992	821.906	4.95108	775.773	806.385	414.741	509.112	826.022	433.011	514.765	849.223	362.552	426.629	849.003	393.867	320.931	821.357	368.591
530	5.29	626.657	1337.73	141.321	662.576	1327.84	72.0608	674.336	1340.74	202.699	740.466	1138.09	-13.4752	777.12	1172.76	306.415	684.814	1125.68	160.067	742.852	775.646	-92.1029	475.506	836.289	-39.0984	497.254	841.984	33.9934	405.184	845.478	10.7634	305.953	821.896	4.95524	775.763	806.348	414.72	509.106	826.004	433.009	514.707	849.209	362.549	426.628	848.984	393.865	320.928	821.341	368.599
531	5.3	626.685	1337.72	141.324	662.567	1327.85	72.0868	674.328	1340.73	202.712	740.414	1138.11	-13.4579	777.121	1172.76	306.443	684.8	1125.69	160.072	742.854	775.655	-92.1278	475.483	836.283	-39.1037	497.296	841.995	33.9646	405.193	845.497	10.7478	305.928	821.898	4.95737	775.768	806.315	414.696	509.124	825.993	432.999	514.681	849.215	362.541	426.642	848.98	393.865	320.905	821.336	368.596
532	5.31	626.739	1337.71	141.357	662.613	1327.87	72.0998	674.39	1340.73	202.727	740.434	1138.14	-13.4591	777.144	1172.77	306.443	684.769	1125.76	160.094	742.863	775.677	-92.1421	475.517	836.286	-39.1315	497.317	841.992	33.9464	405.236	845.503	10.7491	305.961	821.892	4.95815	775.742	806.287	414.689	509.144	825.999	432.993	514.811	849.246	362.556	426.673	848.977	393.867	320.941	821.333	368.605
533	5.32	626.768	1337.76	141.407	662.633	1327.9	72.1262	674.442	1340.74	202.736	740.417	1138.18	-13.4514	777.175	1172.77	306.44	684.804	1125.81	160.069	742.888	775.72	-92.1418	475.534	836.324	-39.138	497.279	842.006	33.9623	405.269	845.512	10.738	305.997	821.898	4.94709	775.742	806.278	414.684	509.174	826.011	432.982	514.849	849.255	362.572	426.704	848.994	393.882	320.956	821.354	368.611
534	5.33	626.702	1337.81	141.398	662.621	1327.95	72.1323	674.446	1340.75	202.759	740.384	1138.22	-13.4267	777.188	1172.76	306.417	684.671	1125.93	160.099	742.898	775.775	-92.1343	475.505	836.38	-39.1194	497.297	842.025	33.9433	405.217	845.607	10.7651	305.97	821.933	4.93995	775.726	806.252	414.664	509.178	826.014	432.979	514.817	849.25	362.548	426.673	849.039	393.88	320.903	821.402	368.619
535	5.34	626.663	1337.85	141.412	662.612	1327.98	72.1521	674.46	1340.76	202.769	740.359	1138.29	-13.4125	777.174	1172.77	306.423	684.71	1125.96	160.071	742.936	775.846	-92.1328	475.491	836.412	-39.0995	497.298	842.023	33.9333	405.149	845.784	10.8201	305.935	821.939	4.93537	775.738	806.268	414.665	509.158	826.019	432.971	514.785	849.231	362.519	426.636	849.076	393.882	320.858	821.432	368.605
536	5.35	626.73	1337.88	141.459	662.616	1327.99	72.1837	674.455	1340.78	202.77	740.333	1138.33	-13.4104	777.182	1172.77	306.434	684.785	1125.96	160.077	742.936	775.906	-92.1565	475.462	836.432	-39.0997	497.277	842.043	33.9478	405.165	845.748	10.8057	305.942	821.919	4.94133	775.737	806.284	414.661	509.177	826.033	432.977	514.793	849.236	362.547	426.63	849.083	393.866	320.869	821.426	368.601
537	5.36	626.801	1337.86	141.464	662.665	1327.98	72.2069	674.459	1340.79	202.782	740.279	1138.37	-13.4011	777.18	1172.76	306.439	684.78	1125.97	160.107	742.874	775.939	-92.1683	475.439	836.447	-39.1056	497.28	842.051	33.95	405.181	845.585	10.7738	305.951	821.897	4.97105	775.764	806.308	414.676	509.179	826.033	432.977	514.797	849.231	362.543	426.615	849.08	393.868	320.862	821.421	368.597
538	5.37	626.796	1337.82	141.491	662.712	1327.96	72.2209	674.458	1340.79	202.786	740.25	1138.4	-13.4071	777.158	1172.76	306.456	684.778	1126	160.123	742.801	775.961	-92.2064	475.441	836.419	-39.1211	497.266	842.037	33.9466	405.134	845.61	10.8089	305.915	821.877	4.98494	775.771	806.308	414.691	509.147	826.021	432.981	514.747	849.201	362.524	426.588	849.036	393.876	320.828	821.398	368.592
539	5.38	626.857	1337.8	141.493	662.747	1327.94	72.2171	674.479	1340.78	202.792	740.225	1138.42	-13.4233	777.175	1172.76	306.46	684.867	1126	160.119	742.828	775.997	-92.2932	475.43	836.387	-39.1433	497.25	842.023	33.9516	405.138	845.653	10.8384	305.916	821.866	4.98743	775.732	806.303	414.678	509.154	826.009	432.984	514.733	849.193	362.542	426.596	848.987	393.86	320.85	821.334	368.591
540	5.39	626.975	1337.75	141.485	662.839	1327.92	72.2181	674.538	1340.76	202.799	740.229	1138.43	-13.4267	777.201	1172.76	306.498	684.938	1126.03	160.128	742.854	776.022	-92.3823	475.478	836.356	-39.1867	497.274	842.044	33.9238	405.221	845.55	10.7703	305.955	821.856	4.98426	775.738	806.321	414.67	509.166	826.007	432.986	514.786	849.198	362.573	426.629	848.959	393.849	320.906	821.297	368.583
541	5.4	627.038	1337.75	141.489	662.902	1327.94	72.2106	674.588	1340.77	202.815	740.243	1138.49	-13.4041	777.25	1172.77	306.503	684.936	1126.11	160.138	742.848	776.049	-92.4357	475.509	836.392	-39.2127	497.315	842.057	33.904	405.231	845.556	10.7542	305.988	821.869	4.98082	775.792	806.346	414.687	509.162	825.998	432.979	514.8	849.207	362.564	426.672	848.938	393.841	320.927	821.289	368.563
542	5.41	627.061	1337.82	141.485	662.924	1328	72.2343	674.651	1340.78	202.829	740.24	1138.56	-13.3758	777.279	1172.79	306.494	684.91	1126.21	160.129	742.931	776.167	-92.4486	475.478	836.464	-39.2144	497.32	842.084	33.8946	405.243	845.636	10.7654	305.993	821.892	4.99325	775.778	806.325	414.689	509.16	826.021	432.963	514.783	849.207	362.542	426.681	848.968	393.853	320.937	821.326	368.555
543	5.42	627.031	1337.96	141.526	662.944	1328.06	72.2744	674.719	1340.82	202.839	740.234	1138.64	-13.3391	777.297	1172.82	306.487	684.897	1126.3	160.14	742.961	776.27	-92.4431	475.435	836.569	-39.196	497.279	842.119	33.8816	405.222	845.815	10.8123	305.962	821.914	5.01173	775.785	806.309	414.69	509.152	826.031	432.97	514.814	849.229	362.543	426.697	849.02	393.88	320.938	821.39	368.594
544	5.43	627.02	1338.12	141.577	662.932	1328.13	72.312	674.783	1340.86	202.865	740.251	1138.73	-13.3112	777.3	1172.83	306.494	684.815	1126.39	160.146	743.008	776.378	-92.4457	475.38	836.664	-39.1699	497.276	842.148	33.8902	405.161	845.792	10.7921	305.932	821.93	5.0337	775.797	806.32	414.693	509.196	826.025	432.992	514.875	849.259	362.552	426.704	849.061	393.906	320.92	821.444	368.638
545	5.44	626.976	1338.2	141.603	662.948	1328.16	72.3417	674.807	1340.86	202.867	740.255	1138.79	-13.2923	777.333	1172.83	306.507	684.761	1126.45	160.167	743.001	776.44	-92.4666	475.32	836.713	-39.1665	497.233	842.162	33.904	405.161	845.658	10.7279	305.888	821.94	5.03145	775.795	806.324	414.691	509.206	826.036	432.996	514.841	849.264	362.536	426.675	849.094	393.897	320.884	821.469	368.644
546	5.45	627.062	1338.15	141.605	662.996	1328.14	72.3491	674.797	1340.86	202.865	740.24	1138.81	-13.3081	777.335	1172.83	306.529	684.842	1126.45	160.16	742.978	776.487	-92.5017	475.301	836.709	-39.1778	497.204	842.151	33.8876	405.155	845.618	10.724	305.882	821.925	5.01864	775.762	806.312	414.68	509.148	826.024	432.963	514.783	849.256	362.516	426.638	849.074	393.885	320.892	821.447	368.615
547	5.46	627.175	1338.05	141.613	663.08	1328.1	72.3468	674.799	1340.84	202.874	740.209	1138.81	-13.3402	777.354	1172.82	306.529	684.924	1126.46	160.125	742.936	776.501	-92.598	475.32	836.658	-39.1978	497.258	842.133	33.849	405.157	845.586	10.7341	305.884	821.898	5.02866	775.759	806.313	414.687	509.129	826.024	432.963	514.754	849.251	362.519	426.644	849.03	393.861	320.906	821.396	368.59
548	5.47	627.273	1337.96	141.632	663.163	1328.06	72.3397	674.863	1340.84	202.899	740.193	1138.8	-13.3546	777.369	1172.81	306.54	685.093	1126.45	160.091	742.872	776.476	-92.6957	475.338	836.601	-39.2188	497.266	842.13	33.8523	405.189	845.57	10.7299	305.923	821.88	5.03105	775.761	806.333	414.687	509.132	826.022	432.977	514.782	849.259	362.519	426.636	849.001	393.846	320.889	821.352	368.573
549	5.48	627.331	1337.92	141.633	663.225	1328.06	72.3485	674.893	1340.85	202.908	740.217	1138.81	-13.3774	777.402	1172.82	306.529	685.009	1126.57	160.104	742.813	776.468	-92.7262	475.376	836.589	-39.2357	497.268	842.131	33.8602	405.199	845.639	10.7466	305.934	821.877	5.02312	775.75	806.343	414.698	509.104	826.034	432.974	514.783	849.279	362.52	426.609	848.99	393.83	320.871	821.316	368.55
550	5.49	627.363	1337.91	141.636	663.271	1328.09	72.3556	674.935	1340.86	202.918	740.225	1138.83	-13.4031	777.45	1172.84	306.517	684.836	1126.71	160.11	742.808	776.478	-92.7207	475.365	836.61	-39.27	497.276	842.147	33.824	405.186	845.743	10.7758	305.931	821.884	5.00589	775.745	806.329	414.684	509.146	826.052	432.979	514.778	849.282	362.526	426.592	849.003	393.817	320.837	821.333	368.551
551	5.5	627.39	1338	141.657	663.283	1328.15	72.3799	675	1340.85	202.926	740.244	1138.88	-13.4143	777.466	1172.83	306.51	684.881	1126.72	160.064	742.852	776.52	-92.6988	475.333	836.639	-39.2809	497.302	842.149	33.7899	405.159	845.698	10.7657	305.905	821.894	5.00118	775.731	806.307	414.662	509.144	826.049	432.962	514.839	849.28	362.533	426.597	849.025	393.821	320.848	821.358	368.547
552	5.51	627.374	1338.16	141.73	663.308	1328.23	72.4259	675.087	1340.84	202.968	740.266	1138.93	-13.4122	777.445	1172.82	306.496	684.97	1126.71	160.059	742.915	776.565	-92.6759	475.308	836.67	-39.2593	497.303	842.136	33.7931	405.086	845.823	10.8204	305.907	821.895	5.00571	775.711	806.274	414.654	509.142	826.036	432.966	514.848	849.242	362.542	426.624	849.041	393.849	320.878	821.378	368.58
553	5.52	627.351	1338.26	141.832	663.322	1328.28	72.4916	675.202	1340.85	203.034	740.259	1138.94	-13.3826	777.431	1172.81	306.498	684.867	1126.75	160.095	742.941	776.556	-92.6389	475.306	836.68	-39.2204	497.261	842.127	33.8274	405.102	845.765	10.8229	305.936	821.896	5.04819	775.753	806.273	414.657	509.146	825.99	432.967	514.852	849.214	362.557	426.637	849.035	393.878	320.909	821.397	368.637
554	5.53	627.392	1338.29	141.912	663.372	1328.31	72.5461	675.314	1340.85	203.083	740.259	1138.94	-13.365	777.488	1172.81	306.533	684.941	1126.71	160.106	742.988	776.572	-92.6205	475.326	836.66	-39.1791	497.241	842.115	33.8499	405.152	845.593	10.7688	305.925	821.895	5.09124	775.817	806.3	414.66	509.163	825.963	432.977	514.813	849.181	362.544	426.67	849.004	393.901	320.945	821.402	368.684
555	5.54	627.529	1338.27	141.911	663.453	1328.31	72.5459	675.355	1340.84	203.096	740.242	1138.92	-13.3883	777.498	1172.83	306.547	685.037	1126.69	160.099	742.975	776.534	-92.6591	475.334	836.62	-39.2118	497.258	842.092	33.8405	405.145	845.553	10.756	305.945	821.872	5.06268	775.821	806.304	414.663	509.161	825.963	432.983	514.847	849.18	362.552	426.699	848.967	393.882	321.009	821.357	368.674
556	5.55	627.646	1338.24	141.829	663.526	1328.3	72.5021	675.335	1340.85	203.069	740.207	1138.88	-13.4315	777.487	1172.85	306.539	685.074	1126.77	160.058	742.95	776.497	-92.6997	475.354	836.582	-39.2737	497.282	842.095	33.7956	405.184	845.559	10.7473	305.979	821.863	5.01915	775.815	806.337	414.699	509.169	825.994	432.966	514.815	849.178	362.545	426.718	848.946	393.84	321.019	821.301	368.61
557	5.56	627.691	1338.23	141.777	663.59	1328.32	72.4618	675.316	1340.87	203.04	740.175	1138.9	-13.459	777.482	1172.88	306.522	684.872	1126.98	160.061	742.939	776.473	-92.7154	475.384	836.578	-39.2969	497.34	842.113	33.7822	405.207	845.586	10.7172	305.985	821.874	4.99588	775.792	806.383	414.749	509.179	826.041	432.946	514.807	849.213	362.522	426.698	848.966	393.798	320.981	821.301	368.571
558	5.57	627.608	1338.27	141.81	663.571	1328.36	72.4814	675.312	1340.94	203.031	740.15	1138.95	-13.4463	777.478	1172.94	306.525	684.751	1127.2	160.07	742.945	776.518	-92.7094	475.383	836.629	-39.2821	497.312	842.136	33.8112	405.161	845.619	10.6988	305.971	821.903	5.00238	775.815	806.442	414.787	509.2	826.068	432.969	514.82	849.271	362.53	426.683	849.015	393.791	320.907	821.338	368.56
559	5.58	627.56	1338.38	141.839	663.537	1328.41	72.5121	675.299	1340.99	203.047	740.142	1139.02	-13.4126	777.435	1172.96	306.537	684.726	1127.3	160.067	742.924	776.577	-92.6862	475.332	836.691	-39.26	497.249	842.151	33.8239	405.137	845.626	10.7145	305.931	821.933	5.04017	775.785	806.479	414.809	509.19	826.064	432.985	514.832	849.302	362.535	426.644	849.061	393.813	320.871	821.393	368.571
560	5.59	627.572	1338.41	141.842	663.544	1328.42	72.5261	675.324	1341.01	203.054	740.142	1139.06	-13.3876	777.38	1172.94	306.579	684.745	1127.25	160.081	742.925	776.654	-92.6734	475.29	836.722	-39.2447	497.259	842.16	33.8166	405.137	845.62	10.7257	305.913	821.936	5.06155	775.759	806.489	414.82	509.175	826.055	433.005	514.786	849.311	362.539	426.634	849.066	393.835	320.873	821.429	368.593
561	5.6	627.627	1338.38	141.861	663.608	1328.41	72.541	675.364	1341.01	203.073	740.157	1139.08	-13.3568	777.358	1172.92	306.601	684.711	1127.22	160.097	742.948	776.71	-92.6758	475.284	836.706	-39.221	497.279	842.138	33.8264	405.175	845.58	10.7202	305.931	821.917	5.06927	775.775	806.499	414.846	509.135	826.042	433.01	514.745	849.295	362.565	426.632	849.048	393.847	320.863	821.426	368.609
562	5.61	627.696	1338.4	141.888	663.666	1328.38	72.5823	675.401	1341	203.109	740.181	1139.1	-13.3162	777.388	1172.92	306.619	684.789	1127.18	160.131	742.95	776.735	-92.6742	475.285	836.671	-39.1727	497.237	842.106	33.8777	405.169	845.548	10.7538	305.959	821.898	5.07849	775.806	806.504	414.876	509.105	826.02	433.01	514.735	849.279	362.588	426.64	849.035	393.864	320.899	821.407	368.629
563	5.62	627.706	1338.39	141.904	663.695	1328.35	72.6126	675.409	1340.98	203.128	740.2	1139.13	-13.2817	777.363	1172.91	306.66	684.76	1127.16	160.182	742.961	776.765	-92.6609	475.262	836.671	-39.1421	497.205	842.094	33.9151	405.171	845.604	10.815	305.907	821.892	5.10153	775.849	806.489	414.9	509.103	825.998	433.024	514.799	849.267	362.613	426.66	849.015	393.895	320.928	821.374	368.66
564	5.63	627.7	1338.35	141.918	663.728	1328.32	72.6072	675.414	1340.97	203.128	740.194	1139.16	-13.2759	777.333	1172.89	306.698	684.886	1127.16	160.158	742.972	776.775	-92.683	475.262	836.689	-39.1647	497.245	842.124	33.8788	405.107	845.711	10.8567	305.912	821.886	5.09947	775.825	806.451	414.922	509.137	825.995	433.024	514.801	849.248	362.599	426.646	849.003	393.895	320.934	821.357	368.654
565	5.64	627.753	1338.25	141.859	663.78	1328.28	72.5817	675.39	1340.95	203.125	740.195	1139.18	-13.302	777.376	1172.86	306.719	685.042	1127.28	160.114	742.933	776.755	-92.7177	475.305	836.676	-39.2196	497.276	842.15	33.8376	405.161	845.624	10.759	305.94	821.869	5.06727	775.814	806.432	414.927	509.122	826.016	433.009	514.773	849.256	362.581	426.65	848.985	393.855	320.929	821.324	368.611
566	5.65	627.756	1338.23	141.824	663.812	1328.26	72.5594	675.405	1340.93	203.129	740.214	1139.2	-13.3018	777.417	1172.87	306.731	685.035	1127.32	160.092	742.929	776.783	-92.7555	475.307	836.689	-39.2572	497.276	842.146	33.8114	405.2	845.617	10.7286	305.973	821.874	5.02335	775.811	806.399	414.923	509.122	826.029	432.989	514.797	849.271	362.583	426.654	848.975	393.833	320.94	821.316	368.591
567	5.66	627.726	1338.24	141.821	663.822	1328.29	72.5714	675.4	1340.92	203.144	740.21	1139.26	-13.2802	777.418	1172.9	306.738	685.132	1127.33	160.09	742.953	776.836	-92.7865	475.284	836.711	-39.2574	497.263	842.157	33.8188	405.169	845.701	10.7645	305.954	821.9	5.02057	775.778	806.364	414.904	509.137	826.031	433.001	514.79	849.278	362.579	426.642	848.986	393.842	320.931	821.326	368.594
568	5.67	627.769	1338.23	141.849	663.882	1328.29	72.5945	675.401	1340.91	203.178	740.197	1139.32	-13.2542	777.393	1172.9	306.784	685.101	1127.35	160.137	742.953	776.885	-92.7892	475.296	836.718	-39.2413	497.255	842.175	33.8291	405.094	845.868	10.8598	305.942	821.896	5.04153	775.8	806.366	414.915	509.163	826.035	433.018	514.768	849.28	362.577	426.646	849.007	393.86	320.917	821.347	368.6
569	5.68	627.802	1338.25	141.873	663.949	1328.31	72.6293	675.435	1340.9	203.216	740.21	1139.39	-13.2385	777.357	1172.88	306.815	684.997	1127.45	160.176	742.954	776.947	-92.8006	475.301	836.727	-39.2352	497.275	842.166	33.8248	405.103	845.807	10.8634	305.98	821.889	5.04934	775.812	806.365	414.92	509.176	826.03	433.017	514.813	849.258	362.584	426.648	849.041	393.867	320.928	821.366	368.604
570	5.69	627.801	1338.27	141.891	664.01	1328.33	72.6775	675.452	1340.92	203.244	740.21	1139.48	-13.2199	777.352	1172.87	306.843	684.959	1127.51	160.156	743.012	777.034	-92.7888	475.286	836.757	-39.2386	497.293	842.177	33.8221	405.21	845.624	10.7782	305.988	821.906	5.04291	775.808	806.361	414.91	509.154	826.034	433.005	514.837	849.257	362.58	426.654	849.065	393.865	320.912	821.405	368.601
571	5.7	627.742	1338.34	141.947	664.025	1328.38	72.7183	675.434	1340.93	203.263	740.203	1139.59	-13.1966	777.364	1172.88	306.853	684.985	1127.6	160.152	743.042	777.137	-92.7599	475.255	836.838	-39.2133	497.314	842.204	33.8082	405.214	845.674	10.7798	305.957	821.924	5.04789	775.805	806.363	414.891	509.134	826.037	432.999	514.748	849.249	362.579	426.626	849.096	393.862	320.859	821.465	368.601
572	5.71	627.702	1338.46	141.998	663.985	1328.45	72.7691	675.45	1340.91	203.304	740.203	1139.69	-13.1639	777.386	1172.89	306.886	684.985	1127.7	160.165	742.994	777.207	-92.7657	475.217	836.902	-39.195	497.327	842.223	33.794	405.169	845.851	10.848	305.918	821.942	5.06544	775.8	806.353	414.908	509.162	826.037	432.998	514.749	849.265	362.577	426.603	849.121	393.868	320.845	821.503	368.619
573	5.72	627.724	1338.47	142.024	664.03	1328.46	72.7869	675.478	1340.92	203.338	740.188	1139.76	-13.1443	777.406	1172.9	306.916	684.94	1127.8	160.164	742.987	777.255	-92.7966	475.202	836.938	-39.2052	497.32	842.243	33.8013	405.137	845.864	10.8308	305.91	821.943	5.06128	775.814	806.347	414.922	509.187	826.045	433.007	514.761	849.281	362.578	426.619	849.109	393.854	320.878	821.466	368.6
574	5.73	627.84	1338.37	142.037	664.105	1328.44	72.7954	675.541	1340.92	203.365	740.164	1139.78	-13.1474	777.408	1172.9	306.926	684.975	1127.78	160.178	743	777.281	-92.8565	475.233	836.914	-39.2435	497.314	842.263	33.8032	405.151	845.723	10.7547	305.954	821.922	5.038	775.842	806.324	414.93	509.193	826.038	433.011	514.778	849.273	362.606	426.672	849.044	393.83	320.887	821.389	368.571
575	5.74	627.931	1338.3	142.07	664.194	1328.4	72.8192	675.608	1340.9	203.42	740.141	1139.78	-13.1415	777.4	1172.87	306.952	685.025	1127.79	160.202	742.958	777.304	-92.9343	475.243	836.876	-39.2514	497.304	842.272	33.8141	405.124	845.727	10.7864	305.956	821.902	5.03737	775.847	806.309	414.939	509.203	826.011	433.021	514.802	849.25	362.619	426.703	848.973	393.815	320.93	821.3	368.562
576	5.75	628.068	1338.23	142.131	664.263	1328.39	72.8621	675.654	1340.89	203.478	740.116	1139.82	-13.1034	777.419	1172.85	307.025	685.162	1127.71	160.217	742.932	777.349	-92.972	475.238	836.833	-39.252	497.237	842.273	33.8486	405.059	845.84	10.9018	305.949	821.865	5.05929	775.84	806.283	414.936	509.17	825.965	433.042	514.788	849.216	362.644	426.708	848.941	393.833	320.969	821.249	368.574
577	5.76	628.028	1338.31	142.219	664.262	1328.41	72.9359	675.696	1340.88	203.537	740.086	1139.88	-13.047	777.378	1172.83	307.076	685.229	1127.66	160.255	742.964	777.43	-92.9813	475.204	836.842	-39.2197	497.207	842.252	33.8583	405.024	845.865	10.9377	305.916	821.853	5.08744	775.817	806.254	414.955	509.117	825.949	433.041	514.817	849.198	362.658	426.702	848.951	393.867	320.951	821.283	368.595
578	5.77	627.963	1338.44	142.3	664.253	1328.48	73.0141	675.708	1340.89	203.587	740.077	1139.95	-13.0066	777.355	1172.81	307.11	685.142	1127.67	160.255	743.002	777.509	-93.0027	475.157	836.897	-39.1788	497.216	842.244	33.8512	405.008	845.866	10.9527	305.873	821.869	5.11498	775.839	806.249	414.974	509.082	825.94	433.031	514.825	849.182	362.642	426.677	848.999	393.892	320.898	821.347	368.619
579	5.78	627.899	1338.54	142.339	664.261	1328.54	73.0602	675.729	1340.91	203.62	740.042	1140.03	-12.9881	777.302	1172.8	307.127	685.188	1127.68	160.231	743.011	777.565	-93.0279	475.131	836.961	-39.1859	497.238	842.261	33.8349	405.043	845.873	10.9195	305.847	821.885	5.11573	775.807	806.218	414.965	509.105	825.945	433.028	514.788	849.192	362.638	426.653	849.05	393.898	320.881	821.412	368.623
580	5.79	627.856	1338.62	142.375	664.289	1328.59	73.0704	675.746	1340.94	203.672	739.989	1140.08	-12.9719	777.222	1172.79	307.153	684.988	1127.83	160.25	742.987	777.603	-93.0624	475.117	836.995	-39.2109	497.255	842.257	33.8066	405.083	845.825	10.8422	305.877	821.909	5.08719	775.803	806.202	414.968	509.104	825.981	433.011	514.779	849.215	362.627	426.624	849.092	393.879	320.893	821.438	368.6
581	5.8	627.903	1338.65	142.389	664.338	1328.62	73.0789	675.733	1340.96	203.705	739.946	1140.12	-12.971	777.22	1172.81	307.186	684.804	1127.91	160.247	742.985	777.637	-93.1218	475.143	836.992	-39.2446	497.28	842.272	33.7892	405.133	845.679	10.7509	305.905	821.924	5.05028	775.791	806.197	414.985	509.066	825.999	432.992	514.762	849.231	362.585	426.621	849.111	393.847	320.865	821.449	368.559
582	5.81	627.913	1338.68	142.415	664.372	1328.64	73.1052	675.726	1340.98	203.75	739.907	1140.14	-12.9703	777.199	1172.81	307.207	684.786	1127.92	160.229	742.974	777.65	-93.175	475.179	836.959	-39.2821	497.309	842.294	33.7772	405.131	845.629	10.7473	305.895	821.942	5.0508	775.817	806.181	414.975	509.076	825.993	432.989	514.827	849.247	362.584	426.621	849.107	393.832	320.842	821.426	368.541
583	5.82	627.929	1338.66	142.475	664.406	1328.64	73.1292	675.76	1340.97	203.812	739.871	1140.13	-12.9613	777.142	1172.78	307.25	684.828	1127.95	160.242	742.963	777.648	-93.2025	475.212	836.938	-39.2876	497.286	842.278	33.7714	405.159	845.61	10.7407	305.929	821.921	5.06169	775.827	806.154	414.956	509.105	825.973	433.016	514.865	849.234	362.61	426.631	849.081	393.834	320.858	821.4	368.554
584	5.83	628.031	1338.61	142.509	664.462	1328.63	73.1631	675.728	1340.94	203.891	739.843	1140.12	-12.9422	777.091	1172.75	307.328	684.89	1127.93	160.274	742.941	777.651	-93.2151	475.218	836.911	-39.2747	497.298	842.251	33.7841	405.159	845.652	10.7784	305.956	821.874	5.04892	775.825	806.13	414.951	509.101	825.939	433.027	514.815	849.191	362.633	426.66	849.036	393.84	320.888	821.354	368.572
585	5.84	628.069	1338.62	142.573	664.459	1328.63	73.21	675.697	1340.92	203.952	739.803	1140.12	-12.9208	777.068	1172.74	307.37	684.953	1127.85	160.299	742.936	777.664	-93.2151	475.184	836.906	-39.2373	497.266	842.251	33.8193	405.141	845.703	10.8386	305.931	821.854	5.08019	775.813	806.128	414.959	509.107	825.91	433.035	514.79	849.176	362.648	426.646	849.014	393.851	320.888	821.338	368.601
586	5.85	628.122	1338.62	142.633	664.411	1328.65	73.2971	675.687	1340.91	204.017	739.763	1140.17	-12.8831	777.043	1172.74	307.384	684.918	1127.86	160.368	742.94	777.707	-93.1983	475.152	836.929	-39.1978	497.223	842.254	33.8585	405.113	845.659	10.8687	305.888	821.855	5.10987	775.787	806.114	414.954	509.084	825.894	433.034	514.771	849.177	362.651	426.641	849.013	393.881	320.906	821.33	368.622
587	5.86	628.055	1338.62	142.699	664.348	1328.7	73.3685	675.697	1340.9	204.097	739.735	1140.22	-12.8476	776.967	1172.72	307.412	684.92	1127.9	160.365	742.929	777.742	-93.1787	475.118	836.968	-39.1684	497.223	842.267	33.8695	405.038	845.785	10.9654	305.863	821.859	5.1472	775.794	806.105	414.962	509.078	825.893	433.031	514.739	849.176	362.668	426.663	849.016	393.887	320.936	821.332	368.621
588	5.87	628.029	1338.63	142.748	664.329	1328.73	73.3929	675.677	1340.9	204.167	739.728	1140.29	-12.8257	776.969	1172.74	307.469	684.905	1127.92	160.343	742.93	777.797	-93.166	475.11	837.017	-39.1769	497.231	842.299	33.8543	405.025	845.827	10.9566	305.885	821.857	5.12622	775.804	806.087	414.976	509.084	825.905	433.034	514.783	849.194	362.678	426.672	849.017	393.883	320.922	821.343	368.612
589	5.88	627.933	1338.68	142.783	664.32	1328.73	73.4405	675.608	1340.89	204.208	739.702	1140.34	-12.812	776.952	1172.73	307.514	684.862	1127.96	160.348	742.94	777.831	-93.1811	475.099	837.059	-39.1849	497.225	842.304	33.8406	404.995	845.87	10.9793	305.878	821.883	5.12567	775.809	806.078	414.984	509.092	825.929	433.024	514.801	849.204	362.665	426.666	849.032	393.882	320.898	821.348	368.585
590	5.89	627.846	1338.71	142.856	664.289	1328.74	73.4993	675.599	1340.89	204.259	739.69	1140.39	-12.7952	776.918	1172.73	307.552	684.8	1128	160.37	742.939	777.879	-93.1923	475.094	837.085	-39.1529	497.207	842.304	33.8744	404.968	845.898	11.0155	305.846	821.904	5.17446	775.801	806.072	414.981	509.108	825.919	433.022	514.804	849.225	362.669	426.658	849.052	393.892	320.877	821.37	368.589
591	5.9	627.811	1338.73	142.917	664.26	1328.75	73.5471	675.581	1340.88	204.323	739.688	1140.43	-12.7911	776.877	1172.72	307.545	684.771	1128.01	160.387	742.922	777.913	-93.2193	475.085	837.107	-39.1332	497.201	842.329	33.9019	405.006	845.892	11.0044	305.82	821.923	5.18697	775.784	806.043	414.97	509.083	825.906	433.039	514.814	849.225	362.676	426.648	849.089	393.906	320.853	821.406	368.608
592	5.91	627.828	1338.7	142.935	664.212	1328.74	73.5739	675.548	1340.88	204.375	739.647	1140.44	-12.7766	776.843	1172.71	307.562	684.774	1128.03	160.395	742.894	777.923	-93.2482	475.076	837.102	-39.1581	497.183	842.332	33.8822	405.025	845.856	10.9768	305.781	821.925	5.18118	775.779	806.044	414.968	509.066	825.914	433.043	514.779	849.235	362.667	426.628	849.096	393.89	320.848	821.41	368.593
593	5.92	627.91	1338.64	142.916	664.155	1328.72	73.5896	675.507	1340.85	204.393	739.574	1140.44	-12.7523	776.82	1172.72	307.609	684.783	1128.01	160.393	742.888	777.92	-93.2669	475.092	837.069	-39.1979	497.21	842.323	33.8522	405.037	845.772	10.942	305.81	821.91	5.14501	775.809	806.051	414.987	509.036	825.925	433.021	514.693	849.206	362.626	426.609	849.082	393.85	320.814	821.406	368.558
594	5.93	627.916	1338.58	142.932	664.14	1328.68	73.5979	675.5	1340.82	204.431	739.522	1140.43	-12.7485	776.808	1172.71	307.652	684.673	1128.04	160.41	742.881	777.914	-93.3114	475.085	837.045	-39.2136	497.232	842.306	33.8274	405.087	845.626	10.853	305.838	821.9	5.13875	775.836	806.037	414.991	509.033	825.912	433.013	514.713	849.19	362.631	426.607	849.057	393.821	320.805	821.374	368.532
595	5.94	627.876	1338.55	142.958	664.152	1328.66	73.632	675.469	1340.8	204.468	739.475	1140.42	-12.7432	776.766	1172.7	307.68	684.599	1128.07	160.411	742.848	777.893	-93.3507	475.078	837.034	-39.2094	497.19	842.306	33.8449	405.077	845.637	10.8754	305.812	821.882	5.14859	775.826	806.015	414.987	509.029	825.91	433.015	514.764	849.188	362.64	426.623	849.047	393.82	320.821	821.345	368.537
596	5.95	627.845	1338.58	143.002	664.149	1328.65	73.6791	675.404	1340.77	204.533	739.447	1140.42	-12.7142	776.717	1172.7	307.702	684.651	1128.03	160.433	742.864	777.905	-93.3277	475.073	837.02	-39.1992	497.187	842.295	33.8542	405.073	845.706	10.9185	305.792	821.888	5.1791	775.766	805.957	414.977	509.003	825.881	433.011	514.808	849.167	362.656	426.621	849.037	393.831	320.836	821.343	368.551
597	5.96	627.826	1338.6	143.044	664.114	1328.66	73.7247	675.383	1340.75	204.603	739.437	1140.43	-12.6802	776.71	1172.67	307.742	684.75	1127.95	160.467	742.874	777.927	-93.3026	475.096	837.016	-39.1775	497.198	842.283	33.8686	405.066	845.67	10.9193	305.802	821.888	5.1866	775.773	805.937	414.997	509.005	825.869	433.011	514.777	849.168	362.674	426.631	849.044	393.858	320.867	821.344	368.58
598	5.97	627.807	1338.6	143.081	664.107	1328.69	73.7937	675.369	1340.73	204.642	739.431	1140.43	-12.6584	776.688	1172.62	307.8	684.719	1127.94	160.497	742.923	777.934	-93.2703	475.141	837.006	-39.1428	497.202	842.26	33.8986	405.029	845.78	11.0061	305.843	821.886	5.19972	775.832	805.933	415.031	509.033	825.85	433.028	514.77	849.175	362.676	426.679	849.033	393.88	320.909	821.345	368.624
599	5.98	627.786	1338.62	143.119	664.06	1328.72	73.8628	675.338	1340.71	204.694	739.424	1140.44	-12.6315	776.687	1172.62	307.777	684.869	1127.87	160.486	742.918	777.924	-93.2608	475.15	837.018	-39.1164	497.204	842.258	33.9149	405.024	845.788	11.0244	305.861	821.874	5.21747	775.833	805.912	415.022	509.035	825.834	433.027	514.786	849.162	362.691	426.702	849.034	393.9	320.946	821.354	368.667
600	5.99	627.743	1338.65	143.144	664.005	1328.73	73.8968	675.218	1340.69	204.761	739.382	1140.45	-12.6177	776.623	1172.62	307.803	684.827	1127.9	160.468	742.904	777.947	-93.236	475.123	837.04	-39.1058	497.216	842.255	33.9037	404.979	845.807	11.0361	305.857	821.875	5.20478	775.791	805.89	415.012	509.053	825.825	433.034	514.818	849.157	362.696	426.691	849.049	393.91	320.924	821.378	368.683
601	6	627.7	1338.65	143.191	663.967	1328.73	73.9196	675.124	1340.69	204.771	739.347	1140.46	-12.5954	776.592	1172.63	307.866	684.73	1127.9	160.473	742.91	777.963	-93.2166	475.097	837.065	-39.1115	497.197	842.263	33.901	404.992	845.786	11.0316	305.833	821.875	5.20289	775.797	805.872	415.008	509.049	825.805	433.025	514.777	849.139	362.674	426.675	849.045	393.902	320.88	821.387	368.663
602	6.01	627.712	1338.62	143.19	663.939	1328.74	73.9558	675.026	1340.68	204.804	739.309	1140.49	-12.5918	776.591	1172.63	307.9	684.756	1127.9	160.476	742.903	777.967	-93.2279	475.088	837.075	-39.1131	497.215	842.286	33.9121	405.085	845.713	10.9887	305.828	821.881	5.19905	775.829	805.892	415.02	509.049	825.823	433.028	514.749	849.154	362.682	426.645	849.046	393.882	320.867	821.378	368.639
603	6.02	627.686	1338.61	143.192	663.89	1328.75	73.9704	674.965	1340.67	204.839	739.243	1140.52	-12.6014	776.565	1172.64	307.913	684.749	1127.96	160.465	742.864	777.98	-93.2621	475.095	837.049	-39.1422	497.191	842.297	33.9092	405.108	845.651	10.9387	305.808	821.879	5.18378	775.828	805.913	415.04	508.991	825.854	433.015	514.735	849.155	362.672	426.622	849.046	393.857	320.857	821.351	368.608
604	6.03	627.695	1338.61	143.176	663.877	1328.75	73.957	674.895	1340.66	204.864	739.155	1140.53	-12.6071	776.53	1172.64	307.907	684.665	1128	160.453	742.818	777.977	-93.301	475.09	837.044	-39.1882	497.177	842.306	33.8897	404.995	845.781	10.9878	305.779	821.888	5.16877	775.802	805.903	415.056	508.961	825.883	433.004	514.731	849.157	362.657	426.592	849.034	393.819	320.811	821.329	368.567
605	6.04	627.734	1338.59	143.163	663.847	1328.76	73.9694	674.889	1340.65	204.873	739.112	1140.57	-12.5936	776.477	1172.62	307.934	684.443	1128.12	160.502	742.812	777.986	-93.3336	475.108	837.044	-39.21	497.216	842.322	33.8595	405.003	845.836	10.9906	305.784	821.894	5.15246	775.804	805.893	415.063	508.984	825.911	432.996	514.743	849.186	362.66	426.578	849.049	393.797	320.788	821.327	368.534
606	6.05	627.7	1338.62	143.209	663.79	1328.8	74.0543	674.854	1340.66	204.907	739.095	1140.59	-12.5713	776.493	1172.61	307.977	684.224	1128.2	160.525	742.806	778.019	-93.3389	475.1	837.068	-39.1883	497.217	842.334	33.8788	405.031	845.844	11.0023	305.794	821.898	5.16405	775.806	805.899	415.075	509.03	825.919	433.001	514.701	849.194	362.656	426.579	849.067	393.819	320.769	821.367	368.542
607	6.06	627.605	1338.7	143.284	663.745	1328.85	74.1373	674.73	1340.66	204.977	739.066	1140.61	-12.5317	776.506	1172.61	307.996	684.324	1128.17	160.548	742.792	778.046	-93.3194	475.059	837.107	-39.1169	497.21	842.342	33.9046	405.005	845.863	11.0317	305.774	821.916	5.20928	775.793	805.882	415.062	509.033	825.896	433.024	514.727	849.188	362.679	426.57	849.103	393.86	320.785	821.405	368.6
608	6.07	627.571	1338.74	143.324	663.689	1328.9	74.1876	674.677	1340.65	205.046	739.022	1140.63	-12.4943	776.496	1172.61	308.012	684.411	1128.1	160.597	742.804	778.045	-93.3169	475.007	837.141	-39.092	497.17	842.334	33.8981	404.965	845.876	11.0545	305.741	821.92	5.23299	775.786	805.836	415.058	509.008	825.86	433.034	514.752	849.17	362.705	426.572	849.111	393.9	320.841	821.406	368.648
609	6.08	627.542	1338.75	143.35	663.726	1328.91	74.1985	674.714	1340.62	205.081	738.984	1140.62	-12.4832	776.489	1172.59	308.01	684.494	1127.97	160.597	742.857	778.06	-93.3309	475.026	837.131	-39.1084	497.185	842.297	33.8864	404.943	845.856	11.0733	305.751	821.901	5.23391	775.793	805.791	415.067	509.019	825.8	433.028	514.761	849.132	362.704	426.627	849.074	393.893	320.862	821.393	368.634
610	6.09	627.632	1338.71	143.38	663.79	1328.91	74.221	674.759	1340.6	205.109	738.983	1140.59	-12.4729	776.482	1172.58	308.017	684.602	1127.9	160.598	742.895	778.064	-93.3571	475.073	837.091	-39.1212	497.181	842.272	33.9126	404.902	845.826	11.0998	305.803	821.863	5.22237	775.846	805.779	415.066	509.01	825.758	433.018	514.755	849.085	362.701	426.666	849.027	393.88	320.897	821.353	368.634
611	6.1	627.618	1338.7	143.429	663.768	1328.9	74.2536	674.737	1340.57	205.135	738.935	1140.57	-12.4633	776.457	1172.56	308.034	684.776	1127.82	160.587	742.886	778.047	-93.3842	475.084	837.064	-39.1147	497.164	842.264	33.9327	404.907	845.797	11.1144	305.815	821.848	5.2332	775.884	805.76	415.039	509.052	825.715	433.013	514.722	849.053	362.709	426.672	848.995	393.901	320.92	821.314	368.631
612	6.11	627.615	1338.72	143.429	663.769	1328.91	74.277	674.668	1340.53	205.161	738.862	1140.57	-12.4385	776.427	1172.54	308.046	684.627	1127.89	160.611	742.873	778.046	-93.4058	475.054	837.054	-39.1246	497.169	842.247	33.9185	404.949	845.796	11.0897	305.795	821.853	5.24691	775.86	805.728	415.021	509.06	825.71	433.011	514.695	849.033	362.698	426.669	848.997	393.903	320.9	821.308	368.618
613	6.12	627.446	1338.81	143.483	663.804	1328.92	74.2867	674.604	1340.54	205.162	738.803	1140.58	-12.416	776.433	1172.55	308.06	684.501	1127.96	160.612	742.859	778.049	-93.4365	475.086	837.03	-39.1526	497.168	842.247	33.9017	405.04	845.746	11.0515	305.81	821.851	5.24095	775.826	805.707	415.022	509.027	825.761	433.007	514.713	849.062	362.691	426.66	848.994	393.872	320.872	821.309	368.6
614	6.13	627.338	1338.91	143.524	663.863	1328.93	74.2813	674.579	1340.57	205.159	738.74	1140.61	-12.4194	776.454	1172.56	308.077	684.505	1127.99	160.624	742.823	778.044	-93.4693	475.117	837.022	-39.1587	497.205	842.254	33.9014	405.059	845.666	10.9854	305.797	821.863	5.22446	775.802	805.716	415.004	509.012	825.799	433.011	514.707	849.11	362.668	426.652	849.009	393.853	320.84	821.305	368.564
615	6.14	627.588	1338.8	143.468	663.861	1328.97	74.308	674.603	1340.62	205.186	738.677	1140.64	-12.4129	776.451	1172.56	308.091	684.448	1128.05	160.653	742.791	778.068	-93.4692	475.1	837.054	-39.1382	497.23	842.281	33.8977	404.955	845.812	11.0804	305.797	821.876	5.22844	775.783	805.717	414.976	509.01	825.817	433.023	514.715	849.15	362.664	426.644	849.054	393.866	320.819	821.345	368.564
616	6.15	627.455	1338.93	143.534	663.772	1329.03	74.3598	674.609	1340.66	205.231	738.582	1140.68	-12.3979	776.449	1172.58	308.114	684.367	1128.07	160.644	742.797	778.1	-93.4401	475.055	837.092	-39.1331	497.244	842.306	33.879	404.966	845.845	11.086	305.81	821.9	5.2215	775.796	805.725	414.971	509.005	825.846	433.021	514.744	849.176	362.67	426.597	849.096	393.87	320.784	821.409	368.586
617	6.16	627.322	1339.05	143.594	663.762	1329.07	74.3887	674.575	1340.69	205.255	738.564	1140.71	-12.3745	776.392	1172.57	308.113	684.347	1128.09	160.66	742.811	778.111	-93.4381	475.028	837.124	-39.1445	497.232	842.291	33.8588	405	845.857	11.0489	305.784	821.92	5.20945	775.795	805.719	414.973	509.025	825.849	433.009	514.741	849.168	362.66	426.561	849.129	393.868	320.742	821.458	368.575
618	6.17	627.521	1338.94	143.538	663.805	1329.09	74.4084	674.572	1340.69	205.271	738.572	1140.71	-12.3599	776.396	1172.54	308.112	684.274	1128.11	160.681	742.823	778.096	-93.4334	475.056	837.125	-39.1492	497.196	842.271	33.8587	405	845.871	11.0285	305.81	821.907	5.20538	775.804	805.689	414.966	509.025	825.829	432.996	514.704	849.14	362.649	426.578	849.133	393.861	320.761	821.469	368.575
619	6.18	627.501	1338.94	143.568	663.787	1329.11	74.4576	674.579	1340.67	205.294	738.572	1140.69	-12.3462	776.448	1172.54	308.121	684.321	1128.1	160.645	742.83	778.083	-93.4178	475.075	837.108	-39.1282	497.196	842.276	33.8659	405.012	845.845	11.0454	305.81	821.905	5.23537	775.821	805.672	414.959	509.043	825.83	433.006	514.738	849.126	362.676	426.597	849.124	393.877	320.793	821.459	368.611
620	6.19	627.586	1338.89	143.594	663.755	1329.12	74.4993	674.558	1340.63	205.336	738.56	1140.64	-12.3256	776.424	1172.52	308.134	684.373	1128.08	160.65	742.842	778.057	-93.4148	475.033	837.104	-39.0987	497.181	842.266	33.9008	404.994	845.821	11.0799	305.772	821.903	5.25478	775.842	805.642	414.961	509.019	825.788	433.009	514.762	849.112	362.685	426.596	849.098	393.891	320.801	821.43	368.636
621	6.2	627.688	1338.82	143.626	663.755	1329.1	74.5107	674.569	1340.58	205.354	738.557	1140.58	-12.3401	776.374	1172.49	308.133	684.419	1128.03	160.659	742.876	778.033	-93.4297	475.026	837.041	-39.1049	497.153	842.235	33.9179	404.967	845.817	11.0966	305.773	821.864	5.23189	775.838	805.593	414.958	508.981	825.754	432.997	514.749	849.079	362.688	426.616	849.036	393.886	320.838	821.348	368.606
622	6.21	627.794	1338.76	143.664	663.774	1329.05	74.5338	674.616	1340.51	205.384	738.585	1140.52	-12.3481	776.34	1172.46	308.143	684.561	1127.88	160.676	742.886	777.997	-93.4767	475.078	836.951	-39.1274	497.164	842.192	33.9275	404.938	845.81	11.1348	305.826	821.837	5.23847	775.847	805.577	414.96	509.011	825.721	433.021	514.72	849.042	362.701	426.653	848.964	393.877	320.896	821.264	368.598
623	6.22	627.938	1338.68	143.707	663.792	1329.03	74.5666	674.698	1340.47	205.427	738.613	1140.49	-12.3308	776.367	1172.46	308.168	684.54	1127.83	160.736	742.881	777.965	-93.4987	475.132	836.919	-39.1287	497.169	842.179	33.9371	404.929	845.798	11.1608	305.824	821.827	5.24679	775.836	805.563	414.946	509.024	825.706	433.053	514.746	849.028	362.733	426.685	848.932	393.881	320.915	821.232	368.597
624	6.23	627.97	1338.68	143.739	663.806	1329.05	74.5964	674.724	1340.48	205.457	738.591	1140.49	-12.3323	776.362	1172.49	308.179	684.561	1127.81	160.742	742.872	777.965	-93.4787	475.139	836.923	-39.1194	497.174	842.198	33.9459	404.925	845.815	11.1676	305.824	821.837	5.23743	775.823	805.568	414.949	509.019	825.727	433.051	514.746	849.044	362.719	426.677	848.951	393.882	320.887	821.274	368.608
625	6.24	627.84	1338.76	143.747	663.789	1329.12	74.6174	674.694	1340.54	205.465	738.536	1140.51	-12.3387	776.395	1172.5	308.159	684.446	1127.9	160.729	742.854	777.977	-93.4416	475.12	836.952	-39.1253	497.211	842.167	33.9089	404.969	845.802	11.123	305.823	821.862	5.22748	775.846	805.596	414.957	508.971	825.753	433.032	514.717	849.054	362.689	426.625	849.02	393.873	320.821	821.348	368.608
626	6.25	627.738	1338.83	143.764	663.775	1329.19	74.6258	674.652	1340.59	205.476	738.501	1140.53	-12.3432	776.424	1172.51	308.139	684.312	1127.99	160.73	742.874	777.973	-93.427	475.127	836.99	-39.1393	497.231	842.167	33.8779	405.017	845.825	11.093	305.84	821.901	5.19546	775.832	805.611	414.96	508.924	825.788	433.01	514.722	849.059	362.67	426.585	849.095	393.869	320.78	821.415	368.616
627	6.26	627.681	1338.92	143.779	663.763	1329.24	74.63	674.603	1340.63	205.473	738.478	1140.55	-12.3565	776.388	1172.5	308.125	684.379	1128.02	160.697	742.925	777.983	-93.4304	475.139	837.004	-39.1484	497.247	842.183	33.8582	405.024	845.879	11.0597	305.87	821.936	5.17615	775.828	805.613	414.954	508.95	825.808	432.982	514.74	849.09	362.656	426.574	849.138	393.872	320.771	821.453	368.619
628	6.27	627.664	1338.96	143.759	663.737	1329.27	74.6357	674.582	1340.66	205.476	738.46	1140.53	-12.3503	776.373	1172.49	308.119	684.241	1128.08	160.7	742.94	777.964	-93.4025	475.133	837.008	-39.1561	497.256	842.178	33.8376	405.049	845.888	11.0395	305.82	821.949	5.17752	775.851	805.579	414.946	509.035	825.808	432.989	514.721	849.098	362.636	426.57	849.155	393.862	320.747	821.462	368.6
629	6.28	627.679	1338.95	143.747	663.778	1329.25	74.6314	674.606	1340.63	205.468	738.471	1140.47	-12.3586	776.405	1172.49	308.117	684.267	1128.09	160.661	742.938	777.896	-93.3739	475.147	836.966	-39.1838	497.293	842.163	33.8219	405.057	845.894	11.0331	305.805	821.939	5.17626	775.829	805.525	414.945	509.057	825.783	432.992	514.785	849.103	362.639	426.595	849.125	393.859	320.796	821.404	368.578
630	6.29	627.733	1338.91	143.771	663.81	1329.24	74.6444	674.69	1340.57	205.493	738.491	1140.41	-12.3522	776.415	1172.48	308.135	684.25	1128.06	160.712	742.95	777.83	-93.3912	475.206	836.903	-39.1851	497.251	842.156	33.8614	405.069	845.886	11.0511	305.829	821.924	5.17642	775.817	805.477	414.94	509.079	825.751	433.001	514.88	849.082	362.68	426.641	849.071	393.863	320.857	821.34	368.589
631	6.3	627.841	1338.86	143.795	663.793	1329.22	74.6567	674.739	1340.54	205.52	738.478	1140.32	-12.3384	776.389	1172.45	308.146	684.253	1127.99	160.803	742.986	777.793	-93.3907	475.249	836.85	-39.1455	497.221	842.12	33.898	405.097	845.865	11.0873	305.879	821.9	5.17326	775.827	805.435	414.93	509.094	825.709	433.017	514.915	849.042	362.726	426.687	849.018	393.871	320.902	821.284	368.605
632	6.31	627.865	1338.84	143.824	663.735	1329.21	74.6754	674.704	1340.53	205.526	738.469	1140.26	-12.3267	776.396	1172.43	308.121	684.388	1127.83	160.814	743.011	777.748	-93.3509	475.237	836.838	-39.1291	497.25	842.084	33.8957	405.089	845.854	11.092	305.865	821.89	5.17957	775.866	805.409	414.936	509.105	825.668	433.017	514.854	849.017	362.721	426.712	848.997	393.879	320.937	821.268	368.626
633	6.32	627.765	1338.87	143.835	663.711	1329.22	74.6815	674.672	1340.54	205.523	738.448	1140.23	-12.3301	776.422	1172.43	308.12	684.48	1127.72	160.761	743.004	777.729	-93.3062	475.251	836.819	-39.1274	497.267	842.037	33.8808	405.089	845.846	11.0679	305.845	821.879	5.17353	775.87	805.399	414.928	509.09	825.637	432.985	514.796	849.005	362.684	426.681	849	393.888	320.933	821.278	368.629
634	6.33	627.781	1338.87	143.837	663.733	1329.22	74.6737	674.645	1340.55	205.531	738.413	1140.24	-12.3299	776.408	1172.41	308.128	684.462	1127.69	160.761	743.038	777.744	-93.271	475.261	836.816	-39.1219	497.277	842.01	33.8707	405.144	845.757	11.0074	305.844	821.882	5.17799	775.86	805.408	414.888	509.09	825.669	432.994	514.782	848.998	362.696	426.676	849.011	393.886	320.919	821.309	368.631
635	6.34	627.753	1338.89	143.866	663.709	1329.23	74.6927	674.606	1340.55	205.534	738.375	1140.24	-12.3237	776.348	1172.41	308.115	684.381	1127.66	160.787	743.043	777.746	-93.2609	475.282	836.818	-39.125	497.244	841.982	33.9189	405.2	845.666	10.9803	305.823	821.896	5.19139	775.846	805.424	414.881	509.053	825.683	433.021	514.772	849.013	362.706	426.661	849.022	393.894	320.902	821.329	368.656
636	6.35	627.726	1338.88	143.865	663.66	1329.24	74.7043	674.557	1340.57	205.543	738.356	1140.23	-12.3221	776.301	1172.41	308.117	684.139	1127.73	160.863	743.044	777.746	-93.2485	475.305	836.813	-39.0952	497.201	841.981	33.9671	405.126	845.824	11.0742	305.807	821.904	5.20717	775.834	805.441	414.885	508.989	825.704	433.038	514.743	849.018	362.707	426.614	849.047	393.892	320.835	821.384	368.667
637	6.36	627.747	1338.86	143.851	663.66	1329.23	74.6979	674.52	1340.56	205.539	738.347	1140.22	-12.336	776.312	1172.42	308.106	684.126	1127.61	160.872	743.037	777.73	-93.2142	475.326	836.793	-39.1058	497.241	841.953	33.96	405.133	845.867	11.0836	305.851	821.903	5.18546	775.859	805.479	414.921	508.954	825.72	433.022	514.715	849.043	362.702	426.598	849.066	393.886	320.83	821.39	368.666
638	6.37	627.739	1338.84	143.82	663.676	1329.23	74.6855	674.529	1340.55	205.537	738.356	1140.2	-12.3591	776.295	1172.41	308.093	684.264	1127.51	160.808	743.057	777.713	-93.2033	475.362	836.777	-39.1342	497.269	841.95	33.9463	405.183	845.809	11.0485	305.88	821.909	5.16273	775.883	805.499	414.949	508.987	825.736	433.032	514.745	849.047	362.709	426.631	849.057	393.884	320.848	821.364	368.642
639	6.38	627.677	1338.86	143.831	663.633	1329.24	74.6973	674.538	1340.54	205.542	738.357	1140.17	-12.3631	776.252	1172.4	308.095	684.166	1127.58	160.857	743.084	777.677	-93.191	475.378	836.776	-39.1322	497.321	841.957	33.9442	405.272	845.65	10.9557	305.919	821.915	5.1643	775.888	805.482	414.964	509.002	825.736	433.044	514.805	849.052	362.726	426.654	849.059	393.878	320.883	821.35	368.641
640	6.39	627.562	1338.91	143.85	663.583	1329.27	74.6985	674.494	1340.53	205.535	738.35	1140.14	-12.3683	776.226	1172.38	308.101	683.975	1127.67	160.891	743.096	777.649	-93.1738	475.369	836.789	-39.1036	497.337	841.955	33.9535	405.31	845.631	10.915	305.914	821.943	5.16692	775.903	805.449	414.967	509.072	825.732	433.055	514.818	849.052	362.707	426.673	849.065	393.885	320.877	821.361	368.653
641	6.4	627.494	1338.95	143.821	663.532	1329.29	74.6964	674.413	1340.54	205.531	738.328	1140.1	-12.3864	776.179	1172.38	308.077	683.919	1127.71	160.846	743.105	777.612	-93.1336	475.394	836.788	-39.0981	497.344	841.946	33.9186	405.293	845.651	10.8962	305.864	821.961	5.15588	775.929	805.429	414.983	509.118	825.728	433.044	514.827	849.057	362.695	426.68	849.071	393.881	320.854	821.391	368.641
642	6.41	627.473	1338.96	143.783	663.473	1329.28	74.6577	674.371	1340.54	205.497	738.301	1140.06	-12.4069	776.166	1172.37	308.058	684.035	1127.63	160.734	743.141	777.574	-93.1083	475.407	836.753	-39.1218	497.353	841.955	33.9117	405.333	845.638	10.8806	305.863	821.96	5.11607	775.949	805.437	415.001	509.109	825.708	433.02	514.814	849.036	362.69	426.682	849.062	393.87	320.862	821.379	368.621
643	6.42	627.45	1338.95	143.778	663.432	1329.26	74.6043	674.31	1340.55	205.492	738.26	1140.01	-12.4075	776.123	1172.37	308.031	684.128	1127.47	160.665	743.168	777.548	-93.0879	475.415	836.717	-39.1448	497.338	841.933	33.9164	405.351	845.716	10.8972	305.874	821.95	5.10489	775.92	805.444	415.003	509.072	825.702	433.002	514.792	849.023	362.685	426.694	849.046	393.869	320.884	821.346	368.614
644	6.43	627.397	1338.93	143.792	663.372	1329.25	74.5925	674.265	1340.56	205.487	738.209	1139.96	-12.3874	776.063	1172.38	308.034	684.035	1127.34	160.735	743.154	777.518	-93.0425	475.407	836.7	-39.1105	497.339	841.876	33.9307	405.267	845.893	10.9969	305.883	821.938	5.12698	775.92	805.473	415.026	509.042	825.69	433.008	514.78	849.012	362.72	426.687	849.034	393.882	320.875	821.349	368.641
645	6.44	627.39	1338.9	143.775	663.299	1329.22	74.6035	674.18	1340.55	205.477	738.173	1139.91	-12.3591	776.018	1172.37	308.055	683.843	1127.25	160.818	743.166	777.492	-93.0011	475.424	836.654	-39.0689	497.328	841.838	33.9802	405.231	845.925	11.0593	305.884	821.922	5.16194	775.945	805.511	415.051	509.028	825.682	433.044	514.761	848.989	362.729	426.672	849.022	393.902	320.889	821.354	368.663
646	6.45	627.404	1338.84	143.748	663.237	1329.17	74.574	674.129	1340.54	205.463	738.127	1139.86	-12.3581	775.964	1172.37	308.048	683.837	1127.13	160.833	743.158	777.463	-92.9888	475.466	836.6	-39.0525	497.331	841.823	34.0077	405.241	845.914	11.1127	305.887	821.9	5.19345	775.914	805.544	415.07	509.065	825.688	433.071	514.787	848.977	362.73	426.658	849.005	393.911	320.896	821.348	368.671
647	6.46	627.333	1338.78	143.698	663.188	1329.11	74.5172	674.054	1340.54	205.432	738.091	1139.83	-12.3499	775.867	1172.34	308.03	683.922	1127	160.794	743.15	777.436	-92.9748	475.467	836.55	-39.0715	497.367	841.801	33.9834	405.268	845.826	11.0783	305.937	821.883	5.16066	775.903	805.569	415.1	509.048	825.657	433.076	514.848	848.972	362.756	426.671	848.999	393.901	320.891	821.333	368.658
648	6.47	627.134	1338.77	143.629	663.105	1329.09	74.4654	673.925	1340.53	205.372	738.061	1139.8	-12.3654	775.827	1172.33	308.028	683.788	1126.98	160.773	743.17	777.431	-92.9396	475.487	836.54	-39.1022	497.357	841.797	33.9702	405.368	845.664	10.9565	305.947	821.887	5.12787	775.896	805.572	415.118	509.018	825.699	433.061	514.79	848.983	362.749	426.666	849.014	393.885	320.865	821.342	368.636
649	6.48	626.998	1338.75	143.547	662.978	1329.07	74.4193	673.767	1340.52	205.333	738.031	1139.8	-12.375	775.774	1172.32	308.012	683.7	1127.02	160.767	743.17	777.417	-92.9152	475.486	836.56	-39.1204	497.34	841.808	33.9485	405.362	845.64	10.8906	305.934	821.895	5.10155	775.873	805.573	415.135	509.025	825.732	433.032	514.746	849.008	362.731	426.636	849.04	393.874	320.825	821.354	368.625
650	6.49	626.891	1338.74	143.489	662.893	1329.06	74.3631	673.659	1340.53	205.326	738.023	1139.8	-12.3877	775.744	1172.33	307.996	683.531	1127.07	160.773	743.157	777.393	-92.8854	475.487	836.593	-39.1426	497.335	841.832	33.9123	405.333	845.755	10.9151	305.912	821.927	5.09083	775.879	805.565	415.159	509.032	825.737	433.012	514.715	848.997	362.694	426.635	849.059	393.857	320.833	821.375	368.613
651	6.5	626.792	1338.72	143.457	662.864	1329.02	74.3157	673.567	1340.48	205.291	738.049	1139.77	-12.4131	775.729	1172.31	307.996	683.507	1127.05	160.775	743.169	777.369	-92.8806	475.495	836.64	-39.1692	497.329	841.846	33.9028	405.299	845.897	10.9458	305.897	821.941	5.08984	775.904	805.534	415.186	509.046	825.744	433.027	514.722	849	362.669	426.647	849.06	393.844	320.848	821.374	368.594
652	6.51	626.719	1338.66	143.44	662.771	1328.98	74.3182	673.455	1340.41	205.271	738.095	1139.74	-12.4148	775.726	1172.29	308.004	683.52	1127.01	160.789	743.167	777.343	-92.862	475.499	836.685	-39.1885	497.35	841.84	33.8824	405.347	845.861	10.9246	305.932	821.942	5.09338	775.894	805.479	415.202	509.089	825.723	433.038	514.756	849.01	362.683	426.657	849.062	393.841	320.827	821.387	368.606
653	6.52	626.611	1338.57	143.475	662.667	1328.95	74.3599	673.368	1340.36	205.29	738.119	1139.71	-12.3984	775.718	1172.28	307.995	683.553	1126.93	160.778	743.158	777.316	-92.8496	475.472	836.702	-39.1666	497.364	841.847	33.8806	405.274	846.046	11.0185	305.942	821.952	5.11114	775.854	805.426	415.209	509.104	825.707	433.054	514.791	849.015	362.702	426.676	849.061	393.861	320.848	821.392	368.634
654	6.53	626.543	1338.5	143.531	662.589	1328.9	74.3857	673.337	1340.31	205.327	738.119	1139.68	-12.3807	775.713	1172.27	307.989	683.735	1126.81	160.768	743.134	777.283	-92.8419	475.467	836.715	-39.1498	497.355	841.841	33.8803	405.299	846.002	11.0147	305.94	821.96	5.11613	775.887	805.413	415.207	509.105	825.681	433.061	514.861	849.014	362.738	426.691	849.054	393.881	320.888	821.369	368.642
655	6.54	626.479	1338.41	143.565	662.551	1328.86	74.4018	673.3	1340.25	205.368	738.131	1139.66	-12.3495	775.698	1172.26	308.005	683.693	1126.79	160.777	743.147	777.275	-92.8288	475.471	836.725	-39.1405	497.347	841.84	33.9	405.379	845.909	10.9859	305.955	821.947	5.13927	775.946	805.423	415.21	509.107	825.669	433.051	514.893	848.992	362.763	426.703	849.035	393.879	320.896	821.358	368.655
656	6.55	626.43	1338.28	143.606	662.457	1328.83	74.4504	673.235	1340.21	205.414	738.125	1139.63	-12.3318	775.662	1172.24	308.02	683.716	1126.73	160.769	743.158	777.263	-92.8374	475.489	836.709	-39.1479	497.368	841.826	33.9056	405.313	846.081	11.0766	305.911	821.96	5.16282	775.941	805.396	415.207	509.099	825.651	433.053	514.871	848.977	362.76	426.695	849.035	393.897	320.905	821.36	368.658
657	6.56	626.385	1338.2	143.627	662.364	1328.8	74.4828	673.194	1340.18	205.453	738.108	1139.61	-12.3432	775.652	1172.23	308.029	683.804	1126.68	160.747	743.115	777.23	-92.8394	475.503	836.675	-39.1582	497.353	841.806	33.9118	405.236	846.127	11.1054	305.901	821.948	5.162	775.937	805.407	415.189	509.068	825.658	433.065	514.824	848.967	362.757	426.683	849.027	393.9	320.874	821.368	368.652
658	6.57	626.377	1338.16	143.625	662.365	1328.76	74.4776	673.175	1340.16	205.452	738.067	1139.58	-12.3464	775.648	1172.22	308.012	683.822	1126.67	160.771	743.111	777.211	-92.8519	475.514	836.639	-39.1825	497.361	841.797	33.8973	405.236	846.042	11.072	305.937	821.939	5.12958	775.922	805.406	415.185	509.05	825.669	433.051	514.819	848.973	362.754	426.667	849.009	393.871	320.866	821.36	368.638
659	6.58	626.336	1338.13	143.667	662.343	1328.77	74.4958	673.167	1340.16	205.465	738.084	1139.57	-12.3429	775.651	1172.21	307.996	683.78	1126.67	160.766	743.146	777.223	-92.8507	475.52	836.634	-39.185	497.37	841.79	33.9016	405.329	845.909	10.9876	305.955	821.929	5.12747	775.939	805.402	415.171	509.054	825.665	433.053	514.815	848.959	362.735	426.667	849.007	393.853	320.863	821.349	368.62
660	6.59	626.244	1338.15	143.718	662.25	1328.79	74.5599	673.147	1340.16	205.489	738.109	1139.58	-12.3182	775.64	1172.2	308.01	683.681	1126.69	160.769	743.156	777.229	-92.824	475.482	836.667	-39.1688	497.374	841.776	33.8961	405.342	846.042	11.0466	305.928	821.934	5.15455	775.939	805.366	415.167	509.041	825.677	433.062	514.824	848.951	362.725	426.656	849.038	393.868	320.882	821.367	368.627
661	6.6	626.105	1338.23	143.772	662.176	1328.82	74.6191	673.1	1340.19	205.536	738.072	1139.58	-12.2961	775.587	1172.19	308.006	683.597	1126.69	160.803	743.177	777.26	-92.8046	475.471	836.726	-39.1369	497.363	841.781	33.8955	405.353	846.095	11.0758	305.92	821.948	5.15267	775.941	805.345	415.142	509.048	825.686	433.053	514.818	848.953	362.738	426.646	849.069	393.89	320.869	821.41	368.653
662	6.61	626.021	1338.33	143.83	662.162	1328.85	74.6411	673.088	1340.21	205.561	738.064	1139.58	-12.3025	775.575	1172.18	308.01	683.653	1126.65	160.805	743.185	777.257	-92.8088	475.472	836.766	-39.1512	497.392	841.782	33.8799	405.341	846.061	11.0179	305.914	821.966	5.14017	775.937	805.303	415.129	509.04	825.675	433.04	514.816	848.96	362.711	426.678	849.08	393.884	320.85	821.443	368.647
663	6.62	626.007	1338.36	143.867	662.19	1328.86	74.667	673.111	1340.19	205.589	738.094	1139.56	-12.2936	775.603	1172.17	308.014	683.636	1126.66	160.801	743.202	777.244	-92.8198	475.484	836.784	-39.1566	497.404	841.797	33.8698	405.357	845.858	10.9304	305.926	821.972	5.1585	775.897	805.249	415.141	509.07	825.674	433.045	514.808	848.958	362.705	426.689	849.076	393.877	320.862	821.424	368.644
664	6.63	626.011	1338.33	143.931	662.198	1328.88	74.7128	673.111	1340.19	205.642	738.089	1139.55	-12.2657	775.612	1172.15	308.025	683.563	1126.69	160.829	743.135	777.199	-92.8251	475.501	836.778	-39.1565	497.404	841.791	33.8731	405.384	845.804	10.933	305.919	821.959	5.1712	775.886	805.213	415.172	509.121	825.666	433.062	514.834	848.963	362.73	426.697	849.065	393.885	320.9	821.379	368.649
665	6.64	625.982	1338.33	143.951	662.229	1328.89	74.7383	673.114	1340.16	205.68	738.093	1139.53	-12.2538	775.595	1172.14	308.038	683.548	1126.67	160.824	743.095	777.169	-92.8265	475.496	836.777	-39.1897	497.403	841.785	33.8657	405.431	845.789	10.9231	305.911	821.95	5.16961	775.9	805.156	415.185	509.134	825.638	433.067	514.87	848.949	362.75	426.714	849.054	393.876	320.913	821.35	368.635
666	6.65	626.066	1338.29	143.936	662.279	1328.9	74.7593	673.161	1340.14	205.701	738.098	1139.49	-12.2717	775.615	1172.13	308.06	683.594	1126.64	160.782	743.091	777.151	-92.8586	475.49	836.759	-39.2343	497.409	841.78	33.8356	405.424	845.79	10.8924	305.947	821.93	5.13385	775.941	805.127	415.176	509.11	825.622	433.053	514.858	848.939	362.734	426.727	849.023	393.836	320.937	821.309	368.589
667	6.66	626.094	1338.29	143.979	662.324	1328.91	74.808	673.182	1340.13	205.743	738.097	1139.47	-12.2665	775.59	1172.11	308.051	683.619	1126.61	160.774	743.1	777.141	-92.8708	475.512	836.734	-39.2303	497.458	841.749	33.8197	405.373	845.881	10.9373	305.96	821.919	5.13201	775.957	805.111	415.184	509.105	825.613	433.026	514.847	848.921	362.722	426.71	849.001	393.814	320.928	821.279	368.573
668	6.67	626.062	1338.32	144.099	662.282	1328.96	74.9224	673.215	1340.11	205.829	738.099	1139.47	-12.2056	775.537	1172.1	308.08	683.581	1126.59	160.809	743.138	777.178	-92.8316	475.498	836.748	-39.1799	497.467	841.732	33.8477	405.34	845.997	11.0439	305.925	821.927	5.17395	775.944	805.086	415.207	509.108	825.607	433.049	514.821	848.903	362.735	426.698	849.017	393.855	320.918	821.316	368.616
669	6.68	626.002	1338.35	144.242	662.263	1328.99	75.0176	673.206	1340.12	205.909	738.104	1139.47	-12.1292	775.528	1172.07	308.116	683.605	1126.58	160.869	743.141	777.211	-92.808	475.482	836.766	-39.1246	497.438	841.726	33.8958	405.331	845.92	11.0455	305.894	821.931	5.21062	775.916	805.068	415.209	509.086	825.601	433.073	514.737	848.912	362.756	426.678	849.042	393.89	320.904	821.372	368.657
670	6.69	625.944	1338.37	144.343	662.275	1329.03	75.0956	673.231	1340.14	205.975	738.112	1139.47	-12.0999	775.527	1172.04	308.141	683.587	1126.55	160.927	743.141	777.238	-92.805	475.499	836.759	-39.1036	497.406	841.731	33.9136	405.239	846.102	11.1647	305.9	821.939	5.23392	775.919	805.074	415.188	509.078	825.594	433.064	514.713	848.901	362.77	426.664	849.052	393.898	320.885	821.404	368.676
671	6.7	626.05	1338.34	144.385	662.339	1329.04	75.1369	673.264	1340.15	206.016	738.135	1139.46	-12.0868	775.529	1172.04	308.175	683.544	1126.53	160.947	743.129	777.238	-92.8242	475.5	836.747	-39.1105	497.368	841.732	33.9267	405.291	846.068	11.1307	305.915	821.947	5.22792	775.95	805.07	415.176	509.055	825.606	433.059	514.773	848.903	362.757	426.665	849.05	393.893	320.892	821.386	368.672
672	6.71	626.227	1338.33	144.39	662.383	1329.05	75.1712	673.281	1340.14	206.056	738.15	1139.44	-12.0678	775.569	1172.04	308.212	683.55	1126.55	160.971	743.131	777.222	-92.833	475.502	836.75	-39.1382	497.381	841.729	33.9249	405.396	845.856	11.0107	305.927	821.947	5.209	775.936	805.02	415.184	509.042	825.602	433.073	514.835	848.899	362.774	426.67	849.049	393.89	320.906	821.374	368.668
673	6.72	626.093	1338.4	144.459	662.384	1329.08	75.2275	673.26	1340.15	206.079	738.164	1139.44	-12.0471	775.621	1172.05	308.236	683.513	1126.58	160.977	743.137	777.196	-92.8273	475.488	836.781	-39.1332	497.398	841.732	33.91	405.381	845.939	11.0167	305.905	821.957	5.19408	775.926	804.984	415.165	509.062	825.587	433.075	514.831	848.909	362.776	426.669	849.068	393.884	320.893	821.397	368.662
674	6.73	626.053	1338.45	144.51	662.358	1329.12	75.2859	673.255	1340.15	206.11	738.224	1139.45	-12.0366	775.638	1172.04	308.23	683.486	1126.58	160.969	743.135	777.175	-92.8006	475.499	836.806	-39.1444	497.422	841.735	33.8902	405.32	846.072	11.0433	305.879	821.969	5.18773	775.94	804.941	415.149	509.121	825.586	433.048	514.831	848.904	362.742	426.673	849.076	393.865	320.863	821.406	368.63
675	6.74	626.088	1338.46	144.54	662.408	1329.12	75.323	673.306	1340.14	206.151	738.286	1139.45	-12.0222	775.666	1172.01	308.221	683.575	1126.54	160.945	743.198	777.187	-92.7845	475.487	836.817	-39.1579	497.474	841.731	33.871	405.366	845.992	10.9669	305.908	821.974	5.1673	775.964	804.893	415.173	509.157	825.592	433.03	514.824	848.881	362.718	426.686	849.061	393.852	320.869	821.395	368.617
676	6.75	626.068	1338.44	144.64	662.426	1329.13	75.3817	673.409	1340.14	206.207	738.334	1139.44	-12.0056	775.672	1171.99	308.258	683.666	1126.53	160.973	743.178	777.175	-92.7949	475.519	836.806	-39.1699	497.483	841.726	33.8476	405.339	846.163	11.0433	305.925	821.949	5.17742	775.946	804.847	415.195	509.161	825.561	433.042	514.851	848.88	362.724	426.703	849.051	393.858	320.891	821.394	368.629
677	6.76	626.097	1338.43	144.753	662.437	1329.15	75.4505	673.467	1340.11	206.282	738.372	1139.43	-11.9868	775.678	1171.98	308.306	683.539	1126.59	161.07	743.148	777.162	-92.8002	475.521	836.795	-39.1592	497.451	841.728	33.8909	405.349	846.091	11.0412	305.88	821.955	5.18553	775.924	804.789	415.197	509.125	825.524	433.055	514.874	848.86	362.739	426.724	849.035	393.86	320.899	821.377	368.632
678	6.77	626.237	1338.41	144.841	662.452	1329.16	75.5235	673.481	1340.11	206.351	738.423	1139.43	-11.9604	775.676	1171.95	308.333	683.486	1126.56	161.117	743.175	777.182	-92.8003	475.521	836.774	-39.1365	497.432	841.717	33.9205	405.413	845.872	10.9638	305.879	821.95	5.1786	775.916	804.744	415.19	509.082	825.525	433.04	514.813	848.826	362.739	426.744	849.019	393.872	320.896	821.345	368.627
679	6.78	626.429	1338.37	144.895	662.499	1329.18	75.6045	673.517	1340.11	206.41	738.496	1139.42	-11.9371	775.662	1171.92	308.35	683.577	1126.56	161.133	743.169	777.164	-92.8202	475.538	836.754	-39.1361	497.429	841.699	33.9319	405.461	845.793	10.9567	305.92	821.94	5.1738	775.926	804.732	415.165	509.058	825.527	433.035	514.825	848.845	362.765	426.752	849.016	393.866	320.909	821.349	368.626
680	6.79	626.441	1338.39	144.982	662.571	1329.2	75.672	673.568	1340.11	206.481	738.555	1139.42	-11.9124	775.677	1171.89	308.359	683.616	1126.56	161.147	743.166	777.159	-92.8104	475.559	836.737	-39.1362	497.452	841.676	33.9338	405.485	845.779	10.9538	305.971	821.937	5.1663	775.923	804.7	415.171	509.089	825.526	433.044	514.842	848.849	362.778	426.747	849.029	393.87	320.893	821.37	368.644
681	6.8	626.319	1338.47	145.091	662.586	1329.26	75.7456	673.568	1340.12	206.562	738.582	1139.42	-11.8867	775.698	1171.89	308.384	683.611	1126.57	161.159	743.145	777.169	-92.7625	475.532	836.761	-39.1082	497.505	841.661	33.9104	405.416	845.883	10.995	305.94	821.961	5.16226	775.895	804.681	415.169	509.07	825.524	433.056	514.846	848.849	362.765	426.707	849.07	393.882	320.872	821.403	368.653
682	6.81	626.164	1338.54	145.187	662.588	1329.34	75.8359	673.602	1340.13	206.636	738.611	1139.42	-11.866	775.711	1171.89	308.415	683.463	1126.61	161.191	743.137	777.185	-92.713	475.491	836.82	-39.0854	497.512	841.659	33.893	405.313	846.12	11.0952	305.892	821.982	5.17279	775.903	804.666	415.169	509.031	825.521	433.054	514.868	848.86	362.753	426.662	849.111	393.896	320.847	821.453	368.665
683	6.82	626.195	1338.56	145.29	662.633	1329.4	75.9027	673.636	1340.13	206.694	738.651	1139.4	-11.8401	775.722	1171.87	308.423	683.417	1126.61	161.225	743.148	777.153	-92.6994	475.496	836.836	-39.0797	497.501	841.688	33.8956	405.35	846.113	11.0759	305.885	821.981	5.16552	775.921	804.634	415.161	509.031	825.524	433.061	514.852	848.871	362.756	426.634	849.11	393.899	320.856	821.44	368.664
684	6.83	626.306	1338.56	145.371	662.693	1329.43	75.971	673.727	1340.12	206.768	738.709	1139.35	-11.8317	775.704	1171.83	308.426	683.586	1126.57	161.21	743.133	777.096	-92.7034	475.523	836.812	-39.113	497.538	841.705	33.9	405.424	845.885	10.9992	305.929	821.955	5.14458	775.908	804.595	415.158	509.083	825.499	433.064	514.864	848.849	362.767	426.689	849.072	393.899	320.91	821.388	368.661
685	6.84	626.428	1338.52	145.451	662.746	1329.46	76.0395	673.89	1340.15	206.851	738.76	1139.29	-11.826	775.718	1171.82	308.436	683.578	1126.58	161.254	743.136	777.042	-92.7	475.534	836.764	-39.1306	497.483	841.698	33.9257	405.434	845.824	10.9699	305.942	821.93	5.14285	775.883	804.544	415.171	509.125	825.471	433.079	514.899	848.823	362.791	426.729	849.021	393.889	320.945	821.322	368.652
686	6.85	626.587	1338.51	145.487	662.79	1329.49	76.112	674.038	1340.19	206.914	738.796	1139.24	-11.8195	775.764	1171.81	308.456	683.623	1126.59	161.231	743.141	776.99	-92.7131	475.563	836.726	-39.1232	497.45	841.691	33.9541	405.428	845.907	11.0107	305.918	821.92	5.15962	775.875	804.524	415.164	509.157	825.445	433.084	514.882	848.79	362.772	426.747	848.99	393.875	320.944	821.294	368.65
687	6.86	626.738	1338.55	145.527	662.85	1329.54	76.1664	673.986	1340.11	206.961	738.858	1139.24	-11.8112	775.794	1171.81	308.466	683.628	1126.59	161.243	743.133	776.958	-92.7005	475.58	836.718	-39.1185	497.483	841.699	33.9546	405.368	846.144	11.1063	305.927	821.932	5.1689	775.922	804.529	415.186	509.153	825.428	433.081	514.919	848.788	362.766	426.762	848.984	393.863	320.944	821.296	368.642
688	6.87	626.735	1338.65	145.583	662.923	1329.59	76.1987	673.985	1340.1	207.018	738.957	1139.25	-11.7898	775.855	1171.81	308.466	683.821	1126.55	161.239	743.126	776.928	-92.6678	475.562	836.742	-39.1008	497.488	841.732	33.9695	405.304	846.221	11.1511	305.923	821.95	5.18439	775.909	804.49	415.2	509.17	825.447	433.097	514.975	848.804	362.799	426.754	848.992	393.864	320.939	821.32	368.636
[truncated: 3 more columns]

## Sheet: Trial01
PathFileType	4	(X/Y/Z)	Trial01.trc
DataRate	CameraRate	NumFrames	NumMarkers	Units	OrigDataRate	OrigDataStartFrame	OrigNumFrames
100	100	753	17	mm	100	1	753
Frame#	Time	nasion			r zyg pr			l zyg pr			r should			l should			sternum			r elbow			r ulna			r radius			r hand			r finger			l elbow			l ulna			l radius			l hand			l finger
		X1	Y1	Z1	X2	Y2	Z2	X3	Y3	Z3	X4	Y4	Z4	X5	Y5	Z5	X6	Y6	Z6	X7	Y7	Z7	X8	Y8	Z8	X9	Y9	Z9	X10	Y10	Z10	X11	Y11	Z11	X12	Y12	Z12	X13	Y13	Z13	X14	Y14	Z14	X15	Y15	Z15	X16	Y16	Z16
1	0	694.869	1347.33	145.739	735.831	1336.07	79.3305	737.307	1344.23	211.219	777.33	1135.43	-15.0405	824.513	1155.66	317.466	726.093	1133.82	165.43	715.528	783.938	-115.646	445.339	834.034	-57.132	474.341	837.541	14.0288	381.769	846.374	6.48771	290.837	821.282	53.8998	761.172	795.754	424.472	497.584	823.124	468.452	498.115	846.676	397.207	412.592	853.426	434.993	305.76	822.991	426.285
2	0.01	694.134	1347.45	145.817	735.426	1336.01	79.3565	736.962	1344.16	211.202	777.351	1135.42	-15.0019	824.504	1155.69	317.476	726.202	1133.75	165.417	715.622	783.966	-115.425	445.325	834.136	-57.0335	474.374	837.546	14.0606	381.701	846.499	6.60327	290.771	821.336	53.9125	761.226	795.774	424.468	497.654	823.127	468.459	498.165	846.667	397.187	412.566	853.487	435.012	305.818	822.991	426.266
3	0.02	692.933	1347.77	146.001	735.032	1335.93	79.3585	736.619	1344.09	211.17	777.321	1135.41	-14.9946	824.431	1155.68	317.448	726.221	1133.67	165.335	715.749	783.966	-115.225	445.292	834.237	-56.9774	474.399	837.562	14.0499	381.616	846.588	6.65558	289.655	821.826	53.6296	761.265	795.786	424.481	497.675	823.123	468.46	498.161	846.637	397.191	412.524	853.53	435.003	305.817	823.01	426.244
4	0.03	692.406	1347.71	145.965	734.766	1335.83	79.3165	736.328	1343.98	211.136	777.336	1135.39	-15.0202	824.367	1155.69	317.451	726.06	1133.68	165.365	715.851	783.893	-115.068	445.318	834.294	-56.9492	474.416	837.566	14.077	381.567	846.59	6.6709	288.424	822.373	53.2305	761.223	795.759	424.481	497.689	823.115	468.484	498.182	846.607	397.197	412.539	853.528	434.999	305.825	822.997	426.202
5	0.04	692.069	1347.6	145.932	734.559	1335.74	79.2842	736.09	1343.9	211.143	777.312	1135.35	-15.0243	824.296	1155.71	317.472	725.944	1133.63	165.402	715.876	783.77	-114.906	445.356	834.293	-56.9053	474.399	837.576	14.1564	381.768	846.362	6.69863	290.158	821.575	53.7245	761.211	795.764	424.496	497.721	823.119	468.519	498.222	846.595	397.223	412.573	853.502	435.011	305.856	822.959	426.196
6	0.05	691.783	1347.48	145.899	734.315	1335.68	79.2677	735.835	1343.82	211.163	777.266	1135.29	-15.018	824.199	1155.73	317.479	725.947	1133.51	165.383	715.884	783.63	-114.727	445.33	834.289	-56.8512	474.352	837.581	14.2269	381.732	846.259	6.74557	290.518	821.366	53.9068	761.212	795.784	424.527	497.688	823.103	468.51	498.228	846.581	397.249	412.574	853.471	435.021	305.849	822.928	426.212
7	0.06	691.504	1347.35	145.794	734.055	1335.61	79.2134	735.534	1343.73	211.161	777.186	1135.24	-15.0371	824.018	1155.78	317.439	725.764	1133.48	165.383	715.863	783.455	-114.564	445.305	834.278	-56.8258	474.309	837.581	14.2549	381.664	846.192	6.76357	290.578	821.307	53.9084	761.216	795.831	424.549	497.636	823.108	468.495	498.179	846.573	397.253	412.549	853.44	434.993	305.785	822.888	426.176
8	0.07	691.252	1347.24	145.717	733.848	1335.54	79.1448	735.28	1343.67	211.154	777.157	1135.18	-15.0832	823.875	1155.83	317.394	725.79	1133.4	165.335	715.805	783.277	-114.452	445.294	834.241	-56.8385	474.259	837.602	14.2632	381.665	846.119	6.75739	290.662	821.246	53.8445	761.22	795.854	424.57	497.625	823.114	468.497	498.178	846.594	397.254	412.548	853.417	434.964	305.756	822.861	426.146
9	0.08	691.09	1347.15	145.684	733.623	1335.5	79.1242	735.019	1343.62	211.155	777.105	1135.11	-15.112	823.782	1155.88	317.384	725.726	1133.36	165.354	715.802	783.144	-114.319	445.289	834.21	-56.813	474.251	837.583	14.2983	381.727	846.025	6.75057	290.714	821.211	53.8182	761.228	795.902	424.61	497.568	823.122	468.511	498.139	846.581	397.27	412.53	853.407	434.967	305.738	822.844	426.127
10	0.09	690.866	1347.08	145.697	733.318	1335.49	79.1483	734.677	1343.57	211.17	776.993	1135.08	-15.1032	823.666	1155.9	317.373	725.41	1133.33	165.446	715.826	783.049	-114.162	445.235	834.225	-56.7439	474.245	837.564	14.3517	381.537	846.091	6.80396	289.666	821.663	53.5249	761.251	795.953	424.658	497.56	823.122	468.523	498.103	846.595	397.277	412.478	853.432	434.966	305.705	822.854	426.112
11	0.1	690.591	1347.06	145.698	733.036	1335.5	79.1453	734.371	1343.53	211.177	776.913	1135.06	-15.1268	823.498	1155.92	317.314	725.197	1133.24	165.391	715.867	782.973	-114.032	445.238	834.261	-56.7245	474.217	837.55	14.3597	381.366	846.196	6.80836	288.344	822.242	53.1363	761.242	796.01	424.69	497.516	823.14	468.515	498.071	846.616	397.263	412.428	853.473	434.944	305.657	822.896	426.078
12	0.11	690.467	1347.02	145.677	732.805	1335.51	79.1324	734.131	1343.49	211.172	776.897	1135.01	-15.1492	823.36	1155.99	317.256	725.255	1133.1	165.248	715.914	782.936	-113.921	445.254	834.301	-56.7269	474.217	837.512	14.3648	381.417	846.084	6.81274	290.03	821.47	53.6239	761.24	796.06	424.707	497.465	823.165	468.512	498.043	846.63	397.244	412.421	853.503	434.944	305.642	822.93	426.043
13	0.12	690.359	1346.99	145.7	732.588	1335.5	79.1588	733.905	1343.47	211.207	776.829	1134.99	-15.1526	823.341	1156.05	317.266	725.361	1133.04	165.185	715.905	782.874	-113.825	445.265	834.316	-56.7022	474.214	837.453	14.3987	381.378	846.105	6.85494	289.447	821.728	53.4454	761.267	796.113	424.732	497.472	823.17	468.526	498.065	846.623	397.254	412.438	853.506	434.964	305.675	822.928	426.041
14	0.13	690.213	1346.96	145.741	732.366	1335.49	79.1637	733.691	1343.43	211.212	776.76	1134.96	-15.149	823.29	1156.08	317.261	725.414	1133	165.166	715.875	782.772	-113.768	445.266	834.334	-56.6674	474.203	837.396	14.4421	381.202	846.223	6.89783	287.301	822.691	52.805	761.237	796.15	424.766	497.479	823.176	468.541	498.08	846.607	397.277	412.451	853.499	434.975	305.69	822.929	426.049
15	0.14	690.027	1346.93	145.781	732.225	1335.48	79.1333	733.558	1343.4	211.202	776.74	1134.93	-15.1834	823.203	1156.09	317.22	725.17	1133.05	165.207	715.858	782.692	-113.753	445.275	834.323	-56.6723	474.208	837.347	14.4646	381.15	846.22	6.93335	286.77	822.917	52.6332	761.216	796.159	424.794	497.496	823.183	468.545	498.135	846.602	397.289	412.444	853.458	434.959	305.717	822.901	426.017
16	0.15	689.9	1346.87	145.733	732.09	1335.45	79.0837	733.415	1343.33	211.176	776.716	1134.89	-15.2174	823.141	1156.11	317.162	725.192	1132.99	165.145	715.835	782.612	-113.765	445.278	834.293	-56.7202	474.204	837.308	14.4619	381.134	846.2	6.91904	286.596	822.95	52.5745	761.224	796.175	424.793	497.494	823.165	468.534	498.153	846.586	397.291	412.453	853.41	434.93	305.69	822.851	425.984
17	0.16	689.912	1346.83	145.688	731.957	1335.42	79.0389	733.325	1343.33	211.132	776.689	1134.85	-15.251	823.08	1156.13	317.112	725.45	1132.84	165.004	715.832	782.533	-113.764	445.264	834.267	-56.7552	474.183	837.277	14.442	381.285	846.045	6.84025	287.557	822.498	52.8479	761.233	796.179	424.799	497.518	823.178	468.537	498.139	846.557	397.298	412.463	853.367	434.91	305.691	822.828	425.993
18	0.17	689.813	1346.79	145.668	731.813	1335.43	79.0044	733.25	1343.32	211.091	776.699	1134.81	-15.284	823.026	1156.13	317.07	725.495	1132.8	164.938	715.835	782.5	-113.757	445.262	834.238	-56.7747	474.185	837.228	14.4248	381.431	845.885	6.77334	288.781	821.962	53.2127	761.231	796.189	424.804	497.498	823.179	468.547	498.121	846.546	397.292	412.452	853.357	434.897	305.678	822.813	425.992
19	0.18	689.652	1346.79	145.671	731.706	1335.45	78.9835	733.177	1343.32	211.044	776.691	1134.79	-15.322	822.991	1156.14	317.041	725.344	1132.86	164.909	715.883	782.515	-113.754	445.222	834.228	-56.7974	474.184	837.175	14.3925	381.28	845.935	6.76822	288.061	822.268	52.9915	761.228	796.21	424.786	497.494	823.172	468.523	498.06	846.554	397.271	412.425	853.374	434.881	305.654	822.81	425.987
20	0.19	689.569	1346.79	145.675	731.625	1335.47	78.9744	733.131	1343.35	211.022	776.691	1134.77	-15.3513	823.004	1156.16	317.005	725.333	1132.84	164.837	715.902	782.507	-113.774	445.175	834.23	-56.8096	474.142	837.129	14.3675	381.254	845.901	6.78895	288.895	821.88	53.2518	761.242	796.243	424.761	497.518	823.177	468.511	498.08	846.552	397.273	412.391	853.394	434.894	305.637	822.833	425.995
21	0.2	689.593	1346.82	145.665	731.59	1335.51	78.959	733.147	1343.36	210.995	776.687	1134.77	-15.3722	822.994	1156.15	316.955	725.5	1132.72	164.803	715.903	782.493	-113.805	445.156	834.21	-56.8361	474.115	837.095	14.3507	381.238	845.959	6.84804	288.154	822.236	53.0163	761.211	796.258	424.733	497.49	823.165	468.53	498.085	846.57	397.278	412.402	853.397	434.91	305.63	822.842	426.016
22	0.21	689.576	1346.89	145.673	731.656	1335.53	78.9149	733.258	1343.4	210.959	776.718	1134.74	-15.3927	822.959	1156.18	316.929	725.529	1132.69	164.77	715.883	782.463	-113.834	445.158	834.191	-56.8803	474.149	837.053	14.3279	381.388	845.882	6.83011	289.041	821.863	53.2542	761.2	796.284	424.724	497.503	823.17	468.533	498.018	846.569	397.258	412.418	853.394	434.908	305.607	822.857	426.037
23	0.22	689.679	1346.94	145.621	731.732	1335.56	78.8604	733.318	1343.46	210.901	776.709	1134.72	-15.44	822.95	1156.18	316.902	725.366	1132.76	164.764	715.857	782.429	-113.865	445.17	834.165	-56.9339	474.151	837.01	14.2857	381.273	845.957	6.80076	287.166	822.715	52.6871	761.194	796.323	424.714	497.491	823.19	468.519	498.004	846.587	397.244	412.407	853.384	434.886	305.583	822.873	426.045
24	0.23	689.857	1347.06	145.548	731.805	1335.6	78.8109	733.479	1343.52	210.841	776.703	1134.71	-15.4951	822.969	1156.17	316.855	725.553	1132.73	164.698	715.845	782.404	-113.909	445.198	834.128	-56.9931	474.155	836.973	14.2172	381.318	845.885	6.72165	287.721	822.471	52.8095	761.188	796.342	424.696	497.485	823.223	468.498	498.005	846.615	397.228	412.388	853.368	434.861	305.574	822.87	426.04
25	0.24	690.037	1347.19	145.513	731.958	1335.65	78.7242	733.696	1343.59	210.773	776.759	1134.69	-15.5429	822.952	1156.18	316.803	725.677	1132.68	164.623	715.88	782.37	-113.928	445.256	834.082	-57.0894	474.173	836.967	14.14	381.554	845.69	6.66873	289.983	821.48	53.4122	761.189	796.338	424.691	497.521	823.252	468.5	498.043	846.621	397.235	412.422	853.354	434.837	305.586	822.845	426.039
26	0.25	690.085	1347.36	145.491	732.1	1335.72	78.6816	733.938	1343.68	210.705	776.799	1134.67	-15.598	822.931	1156.18	316.783	725.672	1132.7	164.597	715.927	782.339	-113.913	445.248	834.079	-57.1423	474.183	836.961	14.1027	381.619	845.635	6.65116	290.626	821.224	53.564	761.191	796.332	424.684	497.524	823.242	468.514	498.062	846.606	397.24	412.445	853.343	434.833	305.617	822.817	426.049
27	0.26	690.091	1347.54	145.467	732.245	1335.83	78.6557	734.164	1343.77	210.633	776.818	1134.65	-15.6428	822.949	1156.18	316.715	725.626	1132.71	164.554	715.953	782.282	-113.868	445.213	834.092	-57.1485	474.166	836.927	14.0865	381.49	845.742	6.67508	289.718	821.653	53.2966	761.241	796.347	424.677	497.504	823.219	468.515	498.048	846.591	397.216	412.452	853.349	434.833	305.628	822.804	426.066
28	0.27	690.261	1347.69	145.431	732.445	1335.92	78.6414	734.455	1343.84	210.562	776.878	1134.63	-15.6863	822.948	1156.18	316.67	725.661	1132.69	164.507	715.998	782.218	-113.821	445.22	834.064	-57.1577	474.148	836.86	14.0969	381.319	845.872	6.68994	287.456	822.691	52.5959	761.258	796.347	424.673	497.497	823.192	468.489	498.066	846.553	397.201	412.474	853.346	434.829	305.665	822.781	426.065
29	0.28	690.477	1347.82	145.419	732.71	1336	78.5987	734.75	1343.92	210.508	776.97	1134.59	-15.7217	822.986	1156.19	316.649	725.771	1132.69	164.49	716.076	782.165	-113.757	445.276	834.018	-57.2216	474.081	836.862	14.1113	381.313	845.906	6.67548	286.959	822.923	52.3859	761.231	796.336	424.654	497.505	823.191	468.497	498.111	846.534	397.219	412.525	853.326	434.832	305.723	822.742	426.08
30	0.29	690.547	1348.02	145.437	732.926	1336.09	78.5881	735.02	1344.01	210.476	777.032	1134.56	-15.7504	822.992	1156.2	316.623	725.686	1132.73	164.519	716.134	782.079	-113.632	445.274	833.977	-57.23	474.067	836.874	14.0867	381.319	845.917	6.71945	286.84	823.036	52.3792	761.202	796.332	424.627	497.548	823.204	468.512	498.106	846.519	397.214	412.551	853.318	434.847	305.706	822.76	426.101
31	0.3	690.664	1348.28	145.436	733.138	1336.2	78.5913	735.22	1344.1	210.428	777.068	1134.53	-15.7812	822.956	1156.2	316.58	725.526	1132.77	164.508	716.205	781.985	-113.514	445.232	833.941	-57.2349	474.087	836.875	14.0355	381.302	845.933	6.77688	286.767	823.138	52.4059	761.204	796.356	424.641	497.531	823.215	468.479	498.066	846.535	397.194	412.498	853.333	434.84	305.651	822.774	426.092
32	0.31	690.988	1348.53	145.363	733.435	1336.32	78.5696	735.454	1344.19	210.376	777.127	1134.49	-15.8346	822.971	1156.23	316.562	725.604	1132.78	164.458	716.312	781.888	-113.407	445.205	833.915	-57.2784	474.09	836.893	13.9944	381.422	845.844	6.77271	287.842	822.621	52.6277	761.223	796.404	424.657	497.508	823.227	468.443	498.06	846.561	397.177	412.453	853.348	434.806	305.604	822.792	426.068
33	0.32	691.503	1348.7	145.243	733.779	1336.44	78.5044	735.69	1344.28	210.316	777.149	1134.45	-15.8942	822.973	1156.27	316.544	725.553	1132.83	164.442	716.364	781.781	-113.295	445.213	833.861	-57.3297	474.084	836.927	13.9529	381.599	845.742	6.7263	289.155	822.082	52.9996	761.222	796.463	424.684	497.507	823.233	468.443	498.046	846.588	397.171	412.443	853.353	434.782	305.581	822.801	426.063
34	0.33	692.215	1348.73	145.067	734.089	1336.56	78.4366	735.891	1344.45	210.317	777.098	1134.4	-15.9193	822.977	1156.31	316.515	725.655	1132.79	164.412	716.384	781.708	-113.196	445.191	833.785	-57.3623	474.044	836.969	13.9111	381.473	845.881	6.79026	287.364	822.992	52.5476	761.223	796.53	424.699	497.469	823.239	468.459	498.015	846.598	397.173	412.415	853.362	434.763	305.552	822.8	426.07
35	0.34	693.108	1348.55	144.829	734.4	1336.68	78.3962	736.051	1344.7	210.381	777.075	1134.34	-15.9452	822.974	1156.34	316.511	725.759	1132.77	164.391	716.437	781.647	-113.126	445.165	833.714	-57.3939	474.012	837.012	13.8694	381.483	845.895	6.80762	287.043	823.132	52.3698	761.207	796.582	424.725	497.467	823.243	468.464	497.983	846.59	397.157	412.4	853.354	434.755	305.517	822.79	426.073
36	0.35	693.649	1348.65	144.739	734.787	1336.81	78.3365	736.386	1344.79	210.312	777.082	1134.29	-15.9841	822.964	1156.37	316.521	725.806	1132.73	164.391	716.446	781.564	-113.117	445.196	833.651	-57.4301	474.002	837.028	13.842	381.528	845.869	6.80697	287.12	823.085	52.2422	761.221	796.629	424.782	497.48	823.241	468.472	497.958	846.575	397.152	412.451	853.323	434.757	305.529	822.771	426.083
37	0.36	694.1	1348.82	144.68	735.22	1336.95	78.2885	736.783	1344.75	210.167	777.107	1134.26	-15.9775	822.985	1156.4	316.565	725.86	1132.77	164.389	716.481	781.548	-113.102	445.221	833.603	-57.4746	474.033	837.084	13.8121	381.584	845.859	6.82338	287.045	823.221	52.29	761.257	796.666	424.826	497.487	823.244	468.493	497.999	846.567	397.169	412.521	853.297	434.769	305.579	822.756	426.106
38	0.37	694.56	1349.04	144.62	735.565	1337.09	78.2373	737.128	1344.85	210.115	777.128	1134.26	-15.9704	822.98	1156.4	316.596	725.826	1132.88	164.403	716.494	781.54	-113.081	445.193	833.553	-57.5016	474.056	837.164	13.7587	381.569	845.828	6.86781	287.04	823.274	52.3198	761.285	796.674	424.859	497.517	823.238	468.51	498.086	846.555	397.202	412.539	853.307	434.798	305.62	822.748	426.113
39	0.38	695.02	1349.31	144.528	735.869	1337.25	78.1857	737.576	1345.01	210.076	777.12	1134.26	-15.9632	822.937	1156.4	316.578	725.759	1132.97	164.426	716.519	781.576	-113.132	445.141	833.483	-57.5202	474.073	837.26	13.6945	381.551	845.796	6.98486	287.089	823.33	52.3107	761.32	796.69	424.908	497.535	823.237	468.489	498.113	846.563	397.216	412.529	853.339	434.809	305.658	822.756	426.106
40	0.39	695.085	1349.74	144.572	736.222	1337.43	78.1063	738.081	1345.21	210.033	777.139	1134.28	-15.939	822.966	1156.42	316.583	725.738	1133.07	164.468	716.521	781.638	-113.226	445.139	833.478	-57.5533	474.14	837.301	13.6348	381.596	845.797	7.06536	287.164	823.366	52.2586	761.343	796.721	424.964	497.54	823.267	468.492	498.146	846.588	397.216	412.525	853.376	434.809	305.692	822.785	426.11
41	0.4	694.669	1350.41	144.793	736.583	1337.56	78.031	738.582	1345.42	210.005	777.133	1134.29	-15.9288	822.988	1156.44	316.613	725.875	1133.13	164.455	716.503	781.729	-113.347	445.147	833.511	-57.6281	474.106	837.33	13.5632	381.677	845.796	7.02012	287.19	823.375	52.1433	761.29	796.732	425.011	497.531	823.298	468.506	498.162	846.625	397.238	412.538	853.391	434.806	305.68	822.802	426.102
42	0.41	694.88	1350.76	144.843	736.952	1337.67	77.9788	739.145	1345.6	209.998	777.063	1134.32	-15.8955	822.984	1156.44	316.658	725.816	1133.16	164.473	716.431	781.805	-113.496	445.088	833.455	-57.7024	473.963	837.473	13.5014	381.696	845.716	6.98577	287.183	823.398	52.0214	761.284	796.751	425.041	497.507	823.307	468.511	498.126	846.656	397.24	412.521	853.389	434.796	305.633	822.809	426.089
43	0.42	695.183	1351.04	144.872	737.332	1337.76	77.9574	739.62	1345.74	209.97	776.982	1134.33	-15.8649	822.976	1156.42	316.666	725.765	1133.18	164.501	716.317	781.913	-113.69	445.013	833.333	-57.7925	473.851	837.639	13.4194	381.747	845.624	6.97276	287.191	823.422	51.929	761.299	796.773	425.047	497.447	823.313	468.519	498.073	846.635	397.229	412.497	853.378	434.798	305.61	822.804	426.079
44	0.43	695.604	1351.21	144.862	737.703	1337.82	77.9889	740.002	1345.84	209.943	776.94	1134.32	-15.8458	822.986	1156.42	316.671	725.792	1133.18	164.531	716.222	782.065	-113.916	444.941	833.252	-57.8794	473.831	837.728	13.2919	381.799	845.554	6.98387	287.227	823.423	51.8746	761.289	796.764	425.057	497.428	823.298	468.527	497.986	846.624	397.222	412.439	853.361	434.802	305.543	822.81	426.074
45	0.44	696.085	1351.36	144.85	738.092	1337.92	78.0354	740.269	1345.92	209.954	776.889	1134.32	-15.796	822.991	1156.38	316.709	725.979	1133.12	164.536	716.079	782.202	-114.187	444.893	833.209	-57.9695	473.827	837.84	13.13	381.848	845.465	6.9232	287.234	823.43	51.7636	761.258	796.738	425.051	497.394	823.31	468.54	497.973	846.63	397.241	412.41	853.326	434.799	305.503	822.793	426.081
46	0.45	696.424	1351.55	144.866	738.488	1338.04	78.0871	740.552	1346	209.983	776.859	1134.33	-15.7662	823.014	1156.34	316.756	726.078	1133.09	164.531	715.98	782.333	-114.507	444.829	833.085	-58.0964	473.78	838.03	12.9708	381.843	845.41	6.88983	287.246	823.454	51.6385	761.242	796.693	425.027	497.391	823.299	468.538	497.986	846.64	397.25	412.414	853.311	434.8	305.487	822.8	426.076
47	0.46	696.708	1351.75	144.91	738.851	1338.2	78.1567	740.856	1346.12	210.025	776.868	1134.34	-15.7685	823.053	1156.33	316.803	726.029	1133.18	164.585	715.892	782.469	-114.849	444.753	833.01	-58.2099	473.779	838.24	12.7684	381.883	845.394	6.87675	287.268	823.498	51.5694	761.289	796.669	424.983	497.403	823.278	468.518	498.03	846.648	397.254	412.432	853.326	434.805	305.516	822.802	426.075
48	0.47	697.159	1351.9	144.952	739.2	1338.34	78.2492	741.199	1346.21	210.097	776.841	1134.38	-15.7396	823.131	1156.34	316.835	726.166	1133.26	164.619	715.775	782.59	-115.238	444.715	832.988	-58.3567	473.899	838.438	12.5137	381.922	845.375	6.78583	287.299	823.55	51.4626	761.313	796.626	424.92	497.472	823.271	468.516	498.105	846.641	397.258	412.477	853.337	434.822	305.591	822.776	426.091
49	0.48	697.726	1352.07	144.998	739.501	1338.47	78.3315	741.535	1346.29	210.194	776.839	1134.4	-15.7117	823.209	1156.33	316.846	726.401	1133.34	164.632	715.589	782.747	-115.706	444.706	832.912	-58.5311	474.011	838.641	12.2142	381.974	845.344	6.6362	287.328	823.604	51.2793	761.302	796.576	424.861	497.538	823.248	468.523	498.181	846.649	397.255	412.537	853.347	434.825	305.647	822.783	426.083
50	0.49	698.248	1352.3	145.055	739.832	1338.59	78.4097	741.862	1346.37	210.287	776.839	1134.44	-15.6932	823.296	1156.32	316.821	726.495	1133.46	164.625	715.395	782.937	-116.234	444.699	832.788	-58.7338	474.08	838.845	11.9067	382.01	845.324	6.48056	287.332	823.624	51.1313	761.265	796.519	424.808	497.583	823.231	468.521	498.202	846.623	397.246	412.577	853.346	434.805	305.685	822.775	426.074
51	0.5	698.718	1352.53	145.174	740.169	1338.71	78.5268	742.208	1346.45	210.418	776.811	1134.49	-15.6744	823.388	1156.33	316.807	726.438	1133.54	164.642	715.351	783.202	-116.8	444.681	832.681	-58.9444	474.178	839.071	11.6144	382.067	845.288	6.33343	287.361	823.611	51.0245	761.277	796.495	424.76	497.582	823.232	468.511	498.214	846.632	397.233	412.587	853.349	434.798	305.702	822.782	426.073
52	0.51	699	1352.81	145.441	740.467	1338.84	78.705	742.583	1346.54	210.573	776.734	1134.55	-15.6306	823.445	1156.34	316.849	726.648	1133.52	164.641	715.382	783.502	-117.305	444.638	832.582	-59.1225	474.318	839.378	11.2772	382.096	845.282	6.20634	287.427	823.622	50.9633	761.319	796.492	424.746	497.597	823.213	468.513	498.223	846.656	397.225	412.575	853.366	434.811	305.721	822.798	426.094
53	0.52	699.012	1353.1	145.785	740.69	1338.98	78.8844	742.906	1346.62	210.732	776.638	1134.6	-15.5972	823.467	1156.31	316.865	726.643	1133.55	164.647	715.438	783.804	-117.804	444.616	832.471	-59.3723	474.473	839.724	10.8823	382.068	845.301	6.07935	287.541	823.634	50.8995	761.298	796.507	424.726	497.564	823.234	468.515	498.202	846.652	397.24	412.576	853.356	434.821	305.699	822.806	426.107
54	0.53	699.181	1353.31	146.047	740.907	1339.1	79.0216	743.195	1346.69	210.882	776.399	1134.51	-15.4116	823.429	1156.3	316.841	726.646	1133.57	164.634	715.516	784.113	-118.282	444.624	832.325	-59.7376	474.586	840.079	10.4638	382.029	845.336	5.88193	287.746	823.617	50.8287	761.287	796.512	424.712	497.522	823.25	468.509	498.135	846.651	397.227	412.555	853.346	434.807	305.657	822.796	426.091
55	0.54	699.321	1353.53	146.291	741.065	1339.25	79.1594	743.443	1346.74	211.035	775.936	1134.28	-14.9782	823.474	1156.3	316.852	726.644	1133.58	164.664	715.509	784.385	-118.872	444.582	832.203	-60.1433	474.655	840.544	10.0795	382.111	845.389	5.59307	289.081	823.075	51.0765	761.267	796.492	424.681	497.482	823.266	468.496	498.128	846.682	397.214	412.533	853.334	434.789	305.629	822.795	426.087
56	0.55	699.406	1353.72	146.555	741.202	1339.43	79.313	743.678	1346.8	211.203	775.716	1134.27	-14.8148	823.499	1156.29	316.898	726.622	1133.59	164.687	715.471	784.659	-119.645	444.486	832.062	-60.5848	474.599	841.207	9.68747	382.294	845.472	5.20281	291.731	821.926	51.7569	761.26	796.474	424.678	497.472	823.276	468.506	498.143	846.706	397.23	412.531	853.33	434.793	305.608	822.806	426.089
57	0.56	700	1353.64	146.646	741.311	1339.65	79.492	743.974	1346.86	211.411	775.509	1134.32	-14.7339	823.461	1156.26	316.921	726.617	1133.54	164.683	715.379	784.934	-120.503	444.348	831.948	-61.0695	474.515	842.065	9.16018	382.041	846.01	4.9316	292.538	821.811	52.071	761.225	796.438	424.681	497.481	823.285	468.535	498.139	846.699	397.247	412.516	853.358	434.814	305.615	822.804	426.09
58	0.57	700.78	1353.52	146.703	741.395	1339.89	79.6879	744.207	1346.92	211.594	775.296	1134.35	-14.6832	823.354	1156.21	316.887	726.645	1133.46	164.664	715.224	785.171	-121.313	444.224	831.788	-61.557	474.554	843.043	8.44684	381.348	846.996	4.84111	292.921	822.145	52.3425	761.218	796.412	424.69	497.504	823.28	468.531	498.117	846.677	397.26	412.499	853.373	434.827	305.619	822.802	426.097
59	0.58	700.327	1354.05	147.159	741.52	1340.12	79.901	744.442	1346.97	211.791	775.128	1134.38	-14.6328	823.324	1156.19	316.867	726.567	1133.48	164.693	715.109	785.499	-122.114	444.019	831.602	-61.9697	474.763	844.138	7.56857	381.633	847.303	4.32667	293.392	822.75	52.648	761.271	796.397	424.704	497.529	823.238	468.534	498.112	846.634	397.264	412.484	853.359	434.842	305.634	822.79	426.106
60	0.59	700.421	1354.29	147.452	741.627	1340.3	80.1128	744.657	1347.05	212.019	774.965	1134.41	-14.5929	823.277	1156.19	316.882	726.478	1133.49	164.743	715.204	785.972	-122.969	443.756	831.464	-62.3331	475.053	845.332	6.67123	382.503	847.287	3.51934	293.943	823.611	52.9584	761.299	796.39	424.718	497.534	823.23	468.546	498.104	846.625	397.267	412.49	853.345	434.844	305.654	822.771	426.116
61	0.6	700.607	1354.48	147.697	741.703	1340.48	80.2956	744.809	1347.18	212.299	774.77	1134.45	-14.5633	823.2	1156.19	316.88	726.513	1133.43	164.731	715.349	786.485	-123.876	443.53	831.392	-62.7638	474.985	846.758	5.94871	382.742	847.778	2.80586	294.474	824.53	53.2062	761.303	796.39	424.73	497.516	823.229	468.531	498.098	846.614	397.27	412.522	853.332	434.834	305.653	822.757	426.117
62	0.61	700.692	1354.69	147.94	741.735	1340.67	80.475	744.981	1347.24	212.523	774.569	1134.5	-14.5256	823.124	1156.22	316.85	726.481	1133.41	164.695	715.221	786.943	-124.921	443.412	831.337	-63.2743	474.939	848.464	5.09112	382.765	848.526	2.14706	294.86	825.551	53.356	761.286	796.397	424.74	497.517	823.237	468.535	498.076	846.61	397.255	412.534	853.33	434.824	305.642	822.757	426.11
63	0.62	700.94	1354.79	148.146	741.797	1340.85	80.6378	745.141	1347.28	212.706	774.42	1134.58	-14.482	823.056	1156.26	316.84	726.301	1133.41	164.702	714.909	787.34	-125.929	443.339	831.264	-63.8633	475.128	850.272	3.92135	382.75	849.406	1.57475	295.159	826.8	53.4389	761.291	796.426	424.763	497.555	823.244	468.535	498.061	846.618	397.241	412.53	853.314	434.812	305.635	822.748	426.103
64	0.63	701.117	1354.93	148.336	741.791	1341.04	80.816	745.251	1347.32	212.864	774.305	1134.7	-14.4736	822.961	1156.3	316.798	726.256	1133.47	164.699	714.55	787.791	-126.974	443.194	831.239	-64.4069	475.053	852.22	2.86691	382.459	850.672	1.11525	295.536	828.171	53.5739	761.287	796.487	424.777	497.539	823.258	468.543	498.081	846.649	397.251	412.538	853.32	434.812	305.628	822.77	426.106
65	0.64	701.118	1355.07	148.509	741.78	1341.22	80.9677	745.293	1347.32	213.032	774.146	1134.83	-14.4722	822.851	1156.35	316.738	726.108	1133.52	164.669	714.243	788.326	-128	442.982	831.358	-64.875	474.914	854.26	1.84594	381.583	852.511	0.80844	295.805	829.611	53.7333	761.241	796.507	424.799	497.549	823.261	468.528	498.114	846.684	397.268	412.507	853.344	434.797	305.596	822.806	426.096
66	0.65	701.065	1355.15	148.671	741.72	1341.37	81.1072	745.276	1347.3	213.17	773.968	1134.98	-14.4756	822.755	1156.4	316.676	726.114	1133.51	164.618	714.047	788.978	-128.908	442.746	831.695	-65.2675	474.889	856.523	0.81867	381.544	853.7	0.16649	295.853	831.39	53.9575	761.239	796.528	424.801	497.547	823.256	468.509	498.12	846.687	397.245	412.461	853.36	434.774	305.539	822.823	426.072
67	0.66	701.016	1355.16	148.844	741.668	1341.49	81.2413	745.296	1347.27	213.332	773.857	1135.12	-14.4724	822.683	1156.4	316.618	726.045	1133.47	164.571	713.78	789.647	-129.839	442.482	832.104	-65.569	474.831	858.896	-0.2775	382.084	854.629	-0.71866	296.416	833.259	54.3563	761.268	796.551	424.805	497.53	823.263	468.505	498.083	846.676	397.225	412.464	853.345	434.775	305.513	822.819	426.06
68	0.67	700.859	1355.2	149.055	741.578	1341.62	81.3761	745.259	1347.21	213.482	773.745	1135.29	-14.4587	822.573	1156.41	316.597	726	1133.41	164.519	713.294	790.225	-130.87	442.205	832.465	-65.762	474.659	861.416	-1.42311	382.142	856.059	-1.32352	297.288	835.275	54.9523	761.274	796.569	424.818	497.549	823.253	468.523	498.051	846.678	397.219	412.468	853.344	434.765	305.538	822.806	426.068
69	0.68	700.524	1355.26	149.292	741.381	1341.73	81.5323	745.216	1347.15	213.605	773.548	1135.48	-14.426	822.459	1156.43	316.572	725.866	1133.41	164.494	712.663	790.784	-131.924	441.802	832.815	-65.8247	474.377	864.137	-2.53067	381.923	857.96	-1.77989	297.304	838.317	55.4653	761.244	796.566	424.811	497.466	823.252	468.518	498.037	846.676	397.222	412.448	853.339	434.76	305.543	822.788	426.064
70	0.69	700.235	1355.29	149.524	741.133	1341.82	81.6867	745.138	1347.07	213.723	773.401	1135.67	-14.4248	822.358	1156.42	316.534	725.65	1133.46	164.514	711.95	791.418	-132.819	441.274	833.208	-65.751	473.963	866.97	-3.64756	381.445	860.131	-2.07221	297.369	841.812	55.9521	761.203	796.555	424.788	497.432	823.267	468.508	497.994	846.668	397.218	412.44	853.315	434.778	305.517	822.76	426.062
71	0.7	700.073	1355.28	149.664	741.006	1341.86	81.7702	745.034	1347	213.811	773.278	1135.87	-14.4353	822.263	1156.43	316.494	725.801	1133.38	164.435	711.085	792.115	-133.608	440.71	833.702	-65.5608	473.619	869.858	-4.84175	381.135	862.312	-2.43397	297.726	845.52	56.5112	761.181	796.557	424.782	497.461	823.271	468.525	498.022	846.656	397.218	412.436	853.282	434.762	305.487	822.732	426.044
72	0.71	699.865	1355.28	149.759	740.835	1341.89	81.8405	744.905	1346.94	213.871	773.14	1136.06	-14.4381	822.2	1156.46	316.439	725.938	1133.29	164.322	709.968	792.761	-134.487	440.131	834.402	-65.2668	473.165	872.825	-5.97088	380.846	865.024	-2.63124	297.25	850.258	57.2867	761.193	796.572	424.774	497.427	823.286	468.527	498.015	846.653	397.223	412.44	853.267	434.725	305.476	822.73	426.029
73	0.72	699.56	1355.31	149.862	740.595	1341.93	81.9071	744.729	1346.86	213.919	773.016	1136.23	-14.4498	822.135	1156.5	316.384	725.865	1133.31	164.338	708.946	793.371	-135.309	439.57	835.433	-64.8134	472.636	875.947	-6.90476	380.158	868.176	-2.53894	294.92	856.724	58.0617	761.166	796.575	424.741	497.394	823.299	468.497	498.028	846.652	397.222	412.432	853.268	434.712	305.475	822.744	426.022
74	0.73	699.254	1355.31	149.977	740.372	1341.98	81.9736	744.501	1346.78	213.967	772.932	1136.43	-14.4308	822.105	1156.52	316.366	725.793	1133.36	164.347	707.86	794.158	-136.04	438.944	836.839	-64.1702	472.479	878.797	-7.82746	379.725	871.115	-2.57946	294.301	862.274	58.5896	761.146	796.601	424.708	497.395	823.314	468.479	498.054	846.665	397.206	412.423	853.274	434.717	305.481	822.755	426.04
75	0.74	699.143	1355.25	150.049	740.171	1342.03	82.0163	744.258	1346.7	214.032	772.891	1136.63	-14.3953	822.058	1156.55	316.36	725.698	1133.38	164.336	706.52	795.01	-136.725	438.102	838.585	-63.4417	472.178	881.91	-8.28127	379.252	874.697	-2.36853	293.966	867.795	58.9402	761.166	796.643	424.687	497.395	823.345	468.481	498.024	846.693	397.195	412.435	853.287	434.734	305.478	822.76	426.041
76	0.75	699.037	1355.18	150.059	739.887	1342.08	82.066	744.001	1346.64	214.073	772.829	1136.8	-14.3652	822.013	1156.58	316.284	725.739	1133.3	164.302	705.092	795.737	-137.414	437.189	840.822	-62.6559	471.777	884.77	-8.45768	378.733	878.42	-2.02597	293.35	873.548	59.1817	761.195	796.689	424.67	497.407	823.349	468.467	498.017	846.723	397.179	412.428	853.301	434.721	305.479	822.778	426.031
77	0.76	698.843	1355.13	150.096	739.597	1342.11	82.1095	743.755	1346.58	214.102	772.864	1137.14	-14.5076	822.025	1156.63	316.211	725.602	1133.3	164.3	703.712	796.543	-137.87	436.211	843.412	-61.9689	471.115	887.719	-8.18281	378.348	882.249	-1.62513	292.698	879.649	59.1739	761.197	796.717	424.646	497.426	823.314	468.447	497.999	846.717	397.16	412.42	853.309	434.713	305.492	822.797	426.032
78	0.77	698.613	1355.09	150.183	739.288	1342.15	82.1548	743.54	1346.53	214.151	772.979	1137.54	-14.6759	821.99	1156.66	316.183	725.425	1133.35	164.318	702.082	797.456	-138.198	435.067	846.322	-61.2242	470.474	890.674	-7.75356	378.229	886.21	-1.39388	292.158	886.029	59.0007	761.213	796.758	424.621	497.477	823.318	468.445	498.043	846.73	397.162	412.429	853.309	434.711	305.504	822.802	426.038
79	0.78	698.47	1355.03	150.219	738.968	1342.17	82.21	743.367	1346.49	214.194	772.769	1137.43	-14.3038	821.963	1156.68	316.187	725.436	1133.38	164.329	700.164	798.109	-138.501	433.959	849.254	-60.427	470.141	893.7	-7.46261	377.832	890.567	-1.01315	291.642	892.691	58.7699	761.252	796.786	424.644	497.531	823.322	468.467	498.101	846.742	397.167	412.451	853.293	434.714	305.5	822.807	426.04
80	0.79	698.192	1354.99	150.256	738.677	1342.18	82.2429	743.182	1346.45	214.21	772.64	1137.7	-14.2725	821.954	1156.69	316.162	725.443	1133.4	164.36	697.659	798.581	-138.901	432.877	852.36	-59.6631	469.426	897.023	-6.97619	377.302	895.07	-0.65464	291.052	899.6	58.3462	761.261	796.792	424.634	497.539	823.298	468.471	498.153	846.742	397.176	412.48	853.255	434.687	305.505	822.783	426.025
81	0.8	697.955	1354.92	150.28	738.359	1342.17	82.2598	742.973	1346.39	214.218	772.511	1138.27	-14.451	821.957	1156.72	316.125	725.334	1133.43	164.391	695.095	799.214	-139.436	431.731	855.609	-58.9162	468.704	900.273	-6.64524	376.772	899.681	-0.27854	290.549	906.739	57.619	761.276	796.833	424.617	497.543	823.307	468.46	498.146	846.712	397.167	412.514	853.22	434.67	305.536	822.751	426.008
82	0.81	697.743	1354.86	150.325	738.031	1342.14	82.3106	742.799	1346.33	214.255	772.438	1138.55	-14.4076	821.937	1156.74	316.115	725.346	1133.41	164.43	693.701	800.46	-139.402	430.517	858.871	-58.1466	468.21	903.623	-6.57666	376.227	904.414	0.13871	290.257	913.787	57.0308	761.289	796.839	424.608	497.548	823.313	468.466	498.151	846.703	397.18	412.532	853.212	434.687	305.548	822.735	426.028
83	0.82	697.454	1354.76	150.421	737.674	1342.13	82.3902	742.617	1346.28	214.305	772.364	1138.78	-14.2637	821.939	1156.76	316.099	725.465	1133.38	164.453	692.103	801.427	-139.111	429.206	862.367	-57.2693	467.342	907.476	-6.26548	375.639	909.295	0.53065	289.988	920.944	56.6117	761.319	796.855	424.613	497.567	823.305	468.485	498.162	846.693	397.199	412.508	853.24	434.726	305.574	822.738	426.063
84	0.83	697.111	1354.69	150.502	737.35	1342.1	82.4543	742.39	1346.24	214.331	772.296	1138.97	-14.1362	821.948	1156.75	316.08	725.435	1133.33	164.479	689.688	801.631	-138.657	427.817	866.03	-56.393	466.298	911.299	-5.899	375.005	914.362	0.93679	289.571	928.224	56.1666	761.33	796.851	424.603	497.553	823.29	468.476	498.142	846.686	397.184	412.496	853.251	434.733	305.618	822.736	426.073
85	0.84	696.834	1354.64	150.518	737.113	1342.07	82.4664	742.137	1346.2	214.333	772.227	1139.13	-14.0388	821.982	1156.75	316.08	725.463	1133.27	164.494	687.439	802.173	-138.501	426.446	869.817	-55.6282	465.538	915.176	-5.63879	374.554	919.523	1.26496	289.392	935.525	55.6287	761.322	796.841	424.579	497.539	823.29	468.449	498.154	846.683	397.172	412.536	853.228	434.722	305.644	822.739	426.066
86	0.85	696.647	1354.58	150.557	736.912	1342.06	82.4745	741.943	1346.17	214.371	772.175	1139.3	-13.9453	821.998	1156.75	316.071	725.535	1133.23	164.537	685.445	802.915	-138.34	425.22	873.632	-54.7936	465.074	919.138	-5.51285	374.41	924.456	1.41817	289.419	943.015	55.0947	761.317	796.841	424.562	497.572	823.281	468.457	498.146	846.692	397.184	412.555	853.217	434.722	305.661	822.745	426.078
87	0.86	696.368	1354.55	150.611	736.724	1342.05	82.4836	741.761	1346.14	214.389	772.114	1139.48	-13.8499	821.832	1156.71	316.181	725.367	1133.25	164.616	683.271	803.705	-138.015	424.118	877.465	-53.8283	464.815	923.207	-5.62843	374.229	929.724	1.68669	289.602	951.026	54.5326	761.333	796.822	424.534	497.608	823.27	468.469	498.134	846.707	397.198	412.551	853.229	434.734	305.647	822.766	426.095
88	0.87	695.988	1354.55	150.665	736.563	1342.02	82.4879	741.5	1346.14	214.411	772.061	1139.68	-13.7613	821.593	1156.66	316.32	725.208	1133.32	164.73	681.061	804.456	-137.667	423.094	881.339	-52.8752	464.578	927.733	-5.83233	373.916	935.194	1.95678	290.214	959.248	53.804	761.357	796.813	424.523	497.587	823.265	468.474	498.18	846.726	397.19	412.558	853.228	434.722	305.654	822.776	426.084
89	0.88	695.688	1354.54	150.686	736.387	1341.98	82.4972	741.235	1346.14	214.436	771.99	1139.9	-13.6766	821.886	1156.71	316.145	725.207	1133.31	164.769	679.199	805.281	-137.602	422.122	885.193	-51.8901	464.41	932.572	-6.21178	373.714	940.892	2.1979	290.679	967.236	53.1612	761.36	796.816	424.498	497.608	823.27	468.473	498.156	846.732	397.174	412.571	853.224	434.704	305.661	822.791	426.064
90	0.89	695.526	1354.5	150.712	736.226	1341.93	82.5206	741.043	1346.13	214.496	771.85	1140.13	-13.5321	821.944	1156.71	316.099	725.023	1133.39	164.901	677.272	806.122	-137.525	421.136	889.045	-50.7586	463.912	937.399	-6.50587	373.82	946.691	2.31942	291.069	975.066	52.6245	761.338	796.784	424.483	497.601	823.276	468.478	498.141	846.719	397.174	412.587	853.21	434.7	305.671	822.759	426.071
91	0.9	695.247	1354.5	150.781	736.076	1341.89	82.5524	740.864	1346.11	214.568	771.699	1140.35	-13.3562	821.972	1156.71	316.124	724.893	1133.39	165.033	674.922	806.949	-137.159	420.125	892.969	-49.493	463.594	942.036	-6.91409	373.84	951.996	2.35947	291.673	982.634	52.0588	761.323	796.746	424.481	497.603	823.28	468.489	498.146	846.733	397.197	412.589	853.195	434.698	305.671	822.756	426.089
92	0.91	694.935	1354.47	150.856	735.941	1341.87	82.575	740.648	1346.08	214.631	771.467	1140.43	-13.0191	821.941	1156.7	316.151	724.796	1133.35	165.143	672.036	808.07	-136.75	419.212	896.995	-48.1228	463.706	946.897	-7.6809	373.974	957.72	2.43554	292.353	990.403	51.3711	761.334	796.71	424.473	497.59	823.252	468.484	498.141	846.729	397.209	412.572	853.187	434.697	305.63	822.771	426.092
93	0.92	694.732	1354.42	150.899	735.788	1341.84	82.6082	740.443	1346.05	214.673	771.298	1140.51	-12.6354	821.925	1156.67	316.177	724.528	1133.44	165.359	669.759	808.947	-136.617	418.394	901.138	-46.6778	463.466	951.941	-8.25346	374.249	963.592	2.48521	293.247	998.231	50.5364	761.321	796.671	424.466	497.575	823.236	468.479	498.159	846.708	397.203	412.561	853.201	434.717	305.638	822.771	426.091
94	0.93	694.617	1354.34	150.942	735.598	1341.81	82.6919	740.28	1345.99	214.719	771.377	1141.09	-12.6689	821.877	1156.63	316.251	724.262	1133.47	165.54	667.381	809.859	-136.455	417.739	905.321	-45.2178	463.506	957.037	-8.89494	374.556	969.224	2.39716	294.405	1006.21	49.5928	761.32	796.635	424.47	497.599	823.218	468.486	498.195	846.696	397.234	412.574	853.209	434.749	305.654	822.771	426.111
95	0.94	694.463	1354.27	151.003	735.433	1341.79	82.7546	740.1	1345.89	214.733	771.315	1141.47	-12.4369	821.854	1156.59	316.32	724.089	1133.48	165.678	665.06	810.776	-136.205	417.289	909.588	-43.752	463.961	962.178	-9.66841	374.957	975.344	2.43833	295.631	1014.36	48.5402	761.289	796.588	424.479	497.602	823.226	468.512	498.216	846.678	397.27	412.584	853.205	434.774	305.645	822.764	426.123
96	0.95	694.227	1354.28	151.065	735.304	1341.77	82.8161	739.964	1345.83	214.769	771.231	1141.78	-12.1823	821.804	1156.58	316.389	723.712	1133.58	165.849	663.128	811.942	-136.027	416.946	914.007	-42.4406	464.232	967.491	-10.3254	375.658	981.567	2.39869	297.019	1022.4	47.5205	761.295	796.546	424.508	497.607	823.218	468.52	498.199	846.662	397.266	412.576	853.201	434.778	305.64	822.749	426.117
97	0.96	694.091	1354.27	151.081	735.174	1341.75	82.87	739.822	1345.79	214.778	771.14	1142.08	-11.9336	821.765	1156.57	316.442	723.502	1133.64	165.996	661.376	813.131	-135.863	416.684	918.565	-41.0946	464.828	972.641	-11.2491	376.463	987.525	2.18107	298.786	1030.34	46.482	761.304	796.528	424.503	497.661	823.215	468.523	498.191	846.662	397.249	412.588	853.182	434.767	305.628	822.728	426.117
98	0.97	694.047	1354.22	151.102	735.059	1341.75	82.9095	739.614	1345.75	214.815	771.096	1142.36	-11.7056	821.709	1156.58	316.484	723.426	1133.66	166.075	659.272	814.217	-135.716	416.643	923.221	-39.7505	465.211	978.118	-12.1691	377.285	993.9	1.98453	300.642	1038.73	45.229	761.314	796.527	424.522	497.68	823.204	468.538	498.179	846.662	397.258	412.577	853.161	434.76	305.636	822.731	426.121
99	0.98	693.899	1354.21	151.118	734.937	1341.75	82.9463	739.394	1345.72	214.876	771.087	1142.67	-11.4924	821.606	1156.6	316.539	723.376	1133.65	166.094	656.811	815.159	-135.531	416.711	928.011	-38.2658	465.892	983.339	-13.4853	378.156	1000.02	1.68635	302.445	1047.42	44.0131	761.34	796.527	424.557	497.662	823.194	468.551	498.179	846.669	397.259	412.571	853.14	434.739	305.635	822.737	426.099
100	0.99	693.652	1354.27	151.134	734.8	1341.74	82.9718	739.212	1345.71	214.926	771.161	1142.98	-11.2997	821.52	1156.62	316.585	723.277	1133.65	166.107	654.389	816.121	-135.353	416.749	932.928	-36.7306	466.252	988.855	-14.7209	379.129	1006.15	1.4618	304.636	1055.77	42.7207	761.339	796.514	424.574	497.627	823.21	468.526	498.195	846.681	397.252	412.558	853.153	434.707	305.61	822.764	426.077
101	1	693.502	1354.26	151.147	734.631	1341.76	83.0137	738.979	1345.74	214.991	771.282	1143.29	-11.1127	821.42	1156.62	316.602	723.11	1133.67	166.172	652.34	817.355	-135.282	416.752	938.034	-35.1626	467.036	994.392	-16.2336	380.613	1012.28	0.81044	307.006	1064.23	41.0183	761.353	796.511	424.588	497.608	823.237	468.509	498.164	846.665	397.257	412.545	853.189	434.69	305.606	822.782	426.062
102	1.01	693.391	1354.23	151.187	734.468	1341.78	83.0641	738.721	1345.74	215.03	771.441	1143.55	-10.9341	821.34	1156.63	316.663	723.02	1133.69	166.272	650.334	818.739	-135.002	416.792	943.356	-33.7255	467.624	999.992	-17.541	381.914	1018.75	0.33435	309.139	1072.59	39.614	761.339	796.507	424.625	497.587	823.252	468.532	498.177	846.678	397.268	412.549	853.206	434.703	305.629	822.784	426.081
103	1.02	693.255	1354.21	151.182	734.347	1341.77	83.0852	738.522	1345.75	215.081	771.65	1143.78	-10.7396	821.237	1156.64	316.703	723.136	1133.64	166.286	648.092	820.111	-134.79	417.212	948.786	-32.3973	468.687	1005.54	-18.9589	383.479	1025.27	-0.25801	310.817	1080.93	38.7193	761.332	796.507	424.656	497.571	823.246	468.548	498.205	846.679	397.288	412.575	853.2	434.699	305.659	822.777	426.088
104	1.03	693.191	1354.18	151.142	734.217	1341.76	83.0837	738.261	1345.75	215.084	771.908	1144.01	-10.5463	821.164	1156.62	316.714	723.115	1133.64	166.289	645.753	821.472	-134.739	417.765	954.441	-31.2961	469.914	1011.13	-20.3486	385.242	1031.83	-0.80161	313.231	1089.41	37.2578	761.373	796.504	424.68	497.584	823.233	468.545	498.206	846.663	397.283	412.607	853.183	434.695	305.684	822.759	426.066
105	1.04	693.079	1354.15	151.12	734.097	1341.75	83.0793	737.961	1345.73	215.075	772.272	1144.26	-10.3349	821.099	1156.64	316.722	723.036	1133.62	166.249	643.477	822.785	-134.734	418.459	960.239	-30.234	470.884	1016.71	-21.4675	386.959	1038.64	-1.24741	316.053	1097.98	35.6846	761.378	796.481	424.713	497.637	823.215	468.544	498.238	846.642	397.28	412.604	853.171	434.696	305.692	822.784	426.078
106	1.05	692.879	1354.14	151.096	733.983	1341.75	83.0319	737.783	1345.72	215.089	772.7	1144.54	-10.1014	821.032	1156.65	316.749	723.093	1133.59	166.225	641.229	824.259	-134.576	419.122	965.999	-29.1761	472.335	1022.25	-22.8146	388.955	1045.38	-1.74477	319.225	1106.5	34.1711	761.375	796.463	424.752	497.669	823.21	468.554	498.273	846.627	397.292	412.622	853.146	434.693	305.706	822.777	426.087
107	1.06	692.755	1354.08	151.041	733.889	1341.7	82.9617	737.541	1345.69	215.018	773.17	1144.89	-9.86325	820.91	1156.65	316.758	722.995	1133.65	166.291	638.928	825.985	-134.233	419.792	971.916	-28.0473	473.931	1027.79	-24.1605	391.077	1052.04	-2.24767	322.443	1114.91	32.7614	761.412	796.464	424.817	497.644	823.21	468.553	498.245	846.594	397.283	412.614	853.119	434.661	305.719	822.75	426.069
108	1.07	692.638	1354.03	150.943	733.771	1341.65	82.8958	737.311	1345.67	214.915	773.653	1145.27	-9.67362	820.818	1156.63	316.748	722.977	1133.65	166.254	636.679	827.57	-134.143	420.647	977.82	-26.954	475.26	1033.14	-25.3826	393.25	1058.56	-2.77329	325.793	1123.21	31.2213	761.466	796.495	424.883	497.601	823.214	468.537	498.245	846.579	397.263	412.592	853.106	434.611	305.691	822.735	426.035
109	1.08	692.574	1353.96	150.77	733.676	1341.61	82.8235	737.077	1345.65	214.828	774.071	1145.62	-9.51246	820.733	1156.62	316.772	723.182	1133.57	166.107	634.464	829.192	-134.333	421.661	983.583	-26.0851	476.524	1038.63	-26.8041	395.506	1065.02	-3.23275	329.169	1131.22	29.635	761.449	796.491	424.907	497.579	823.231	468.527	498.226	846.582	397.255	412.569	853.091	434.586	305.656	822.733	426.012
110	1.09	692.52	1353.89	150.587	733.643	1341.58	82.7195	736.834	1345.64	214.737	774.492	1145.96	-9.34752	820.674	1156.63	316.805	723.393	1133.52	165.982	632.433	831.009	-134.52	423.385	989.154	-24.7916	477.852	1044.26	-28.308	397.905	1071.43	-3.64428	332.683	1138.95	28.2475	761.434	796.469	424.951	497.559	823.232	468.543	498.224	846.574	397.263	412.548	853.081	434.578	305.626	822.737	426.01
111	1.1	692.391	1353.86	150.406	733.636	1341.54	82.5747	736.699	1345.69	214.626	774.987	1146.28	-9.16855	820.607	1156.6	316.817	723.335	1133.56	165.953	630.389	832.837	-134.512	426.156	994.363	-23.2075	479.576	1049.14	-29.3136	400.296	1077.69	-3.94853	336.135	1146.44	27.1825	761.439	796.442	424.995	497.58	823.247	468.562	498.22	846.595	397.262	412.539	853.1	434.571	305.623	822.758	426.008
112	1.11	692.696	1353.63	150.038	733.658	1341.51	82.4088	736.51	1345.72	214.5	775.492	1146.58	-8.96716	820.568	1156.57	316.808	723.539	1133.48	165.853	628.174	834.552	-134.475	428.072	999.758	-22.1852	481.286	1053.82	-30.3828	402.609	1083.74	-4.11302	339.723	1153.66	26.3201	761.473	796.426	425.016	497.633	823.25	468.541	498.217	846.614	397.264	412.545	853.114	434.566	305.636	822.783	426.013
113	1.12	693.758	1353.1	149.403	733.7	1341.51	82.2269	736.361	1345.74	214.351	775.969	1146.87	-8.78782	820.615	1156.56	316.807	723.828	1133.44	165.728	626.06	836.255	-134.467	429.647	1005.13	-21.0854	483.202	1058.56	-31.4513	405.316	1089.66	-4.28935	343.425	1160.57	25.6821	761.476	796.367	425.013	497.635	823.256	468.53	498.215	846.602	397.257	412.565	853.132	434.553	305.647	822.82	426.026
114	1.13	693.641	1353.1	149.089	733.749	1341.5	82.007	736.206	1345.78	214.204	776.432	1147.16	-8.65905	820.592	1156.53	316.8	723.975	1133.41	165.561	624.258	838.086	-134.589	431.387	1010.51	-19.9639	485.108	1063.19	-32.5439	408.052	1095.25	-4.34562	347.252	1167.08	25.2257	761.487	796.299	425.001	497.613	823.261	468.531	498.277	846.592	397.242	412.581	853.151	434.531	305.664	822.846	426.03
115	1.14	692.849	1353.43	148.998	733.821	1341.5	81.8005	736.049	1345.83	214.044	776.942	1147.47	-8.52792	820.512	1156.5	316.796	724.065	1133.4	165.455	622.342	839.854	-134.781	433.319	1015.7	-18.8945	486.821	1067.5	-33.3615	410.762	1100.72	-4.16058	351.072	1173.37	24.9823	761.53	796.246	424.988	497.618	823.26	468.514	498.325	846.6	397.242	412.599	853.153	434.51	305.668	822.858	426.023
116	1.15	692.492	1353.57	148.814	733.905	1341.5	81.6067	735.943	1345.85	213.845	777.46	1147.79	-8.37558	820.455	1156.48	316.809	724.059	1133.42	165.446	620.472	841.46	-135	435.144	1020.72	-17.8064	488.981	1071.77	-34.2015	413.801	1106.01	-3.82135	355.152	1179.35	24.9786	761.531	796.172	424.962	497.64	823.256	468.511	498.334	846.589	397.255	412.628	853.124	434.514	305.713	822.845	426.036
117	1.16	692.344	1353.59	148.563	733.958	1341.47	81.4067	735.849	1345.87	213.652	777.942	1148.12	-8.19804	820.384	1156.42	316.803	724.164	1133.39	165.363	618.883	843.098	-135.061	437.243	1025.34	-16.8038	491.316	1075.92	-34.8106	416.943	1111.06	-3.2477	359.442	1185.13	25.3682	761.503	796.101	424.918	497.638	823.212	468.508	498.331	846.553	397.245	412.612	853.094	434.511	305.729	822.8	426.04
118	1.17	692.448	1353.54	148.292	734.055	1341.41	81.1998	735.816	1345.87	213.439	778.361	1148.42	-8.0215	820.277	1156.38	316.795	724.411	1133.29	165.221	617.348	844.836	-135.058	439.646	1029.66	-15.7356	493.431	1079.78	-35.2531	420.197	1115.88	-2.58698	363.832	1190.59	26.0504	761.488	796.047	424.874	497.621	823.206	468.52	498.326	846.545	397.236	412.603	853.047	434.487	305.718	822.745	426.02
119	1.18	692.541	1353.51	148.067	734.184	1341.36	81.0016	735.78	1345.86	213.234	778.721	1148.72	-7.85155	820.22	1156.33	316.776	724.655	1133.19	165.101	615.839	846.286	-135.192	441.992	1033.94	-14.4818	495.836	1083.28	-35.6829	423.582	1120.34	-1.74043	368.384	1195.68	27.0834	761.462	795.991	424.823	497.639	823.217	468.532	498.323	846.531	397.235	412.623	853.002	434.47	305.712	822.711	426.013
120	1.19	692.58	1353.56	147.851	734.282	1341.35	80.8492	735.653	1345.88	213.061	779.044	1149.01	-7.71118	820.212	1156.32	316.759	724.694	1133.2	165.066	614.229	847.559	-135.396	444.63	1038.01	-13.0774	498.103	1086.53	-36.0411	426.915	1124.58	-0.54628	372.98	1200.47	28.6046	761.465	795.965	424.762	497.646	823.213	468.519	498.339	846.525	397.223	412.617	852.983	434.481	305.708	822.716	426.022
121	1.2	692.268	1353.72	147.674	734.417	1341.34	80.6732	735.592	1345.94	212.89	779.321	1149.28	-7.5857	820.134	1156.32	316.726	724.455	1133.31	165.067	612.816	848.819	-135.642	447.466	1041.72	-11.5244	500.531	1089.71	-36.3908	430.428	1128.54	0.63732	377.642	1204.88	30.4777	761.451	795.939	424.691	497.605	823.216	468.486	498.297	846.517	397.209	412.603	853	434.464	305.647	822.764	426.021
122	1.21	692.067	1353.85	147.477	734.569	1341.37	80.4475	735.573	1346.01	212.686	779.572	1149.56	-7.49264	820.026	1156.33	316.69	724.626	1133.27	164.96	611.559	850.147	-135.86	450.12	1045.37	-9.82531	502.988	1092.59	-36.5221	433.914	1132.31	2.08554	382.445	1208.98	32.6819	761.412	795.92	424.637	497.632	823.217	468.484	498.254	846.527	397.207	412.596	853.026	434.441	305.644	822.78	425.992
123	1.22	692.107	1353.95	147.251	734.713	1341.41	80.2284	735.566	1346.1	212.485	779.799	1149.82	-7.40303	819.93	1156.34	316.667	724.851	1133.21	164.81	610.385	851.365	-135.955	453.265	1048.84	-8.07293	505.509	1095.38	-36.6051	437.748	1136.01	3.73867	387.448	1212.78	35.0153	761.401	795.9	424.596	497.642	823.232	468.488	498.289	846.531	397.201	412.584	853.062	434.432	305.644	822.802	425.974
124	1.23	692.543	1353.81	146.899	734.804	1341.45	80.0529	735.534	1346.21	212.297	779.988	1150.06	-7.31735	819.821	1156.35	316.656	724.782	1133.21	164.76	609.259	852.509	-136.036	456.476	1052.19	-6.27067	508.312	1098.08	-36.5403	441.491	1139.65	5.61236	392.68	1216.5	37.4392	761.398	795.889	424.561	497.651	823.234	468.462	498.312	846.537	397.174	412.577	853.092	434.434	305.63	822.85	425.984
125	1.24	693.294	1353.49	146.374	734.857	1341.46	79.8661	735.433	1346.31	212.091	780.128	1150.25	-7.22685	819.724	1156.41	316.653	724.686	1133.2	164.73	608.243	853.45	-136.152	459.475	1055.48	-4.40618	511.18	1100.45	-36.2647	446.114	1142.88	7.00154	398.285	1220.17	39.7507	761.357	795.867	424.549	497.661	823.234	468.427	498.293	846.532	397.155	412.563	853.106	434.451	305.649	822.877	425.996
126	1.25	693.412	1353.47	146.029	734.92	1341.39	79.6453	735.272	1346.37	211.87	780.298	1150.4	-7.13399	819.631	1156.42	316.642	724.726	1133.2	164.68	607.19	854.425	-136.069	462.887	1058.46	-2.40853	514.172	1102.61	-35.8254	450.452	1146.04	8.72613	404.284	1223.8	41.8751	761.347	795.888	424.559	497.622	823.231	468.434	498.243	846.505	397.158	412.563	853.096	434.455	305.662	822.834	425.997
127	1.26	693.462	1353.45	145.634	734.991	1341.28	79.395	735.121	1346.41	211.645	780.449	1150.5	-7.04784	819.524	1156.43	316.621	724.73	1133.19	164.626	606.079	855.387	-135.817	466.62	1061.17	-0.47603	517.283	1104.67	-35.1483	455.142	1149.04	10.3968	410.388	1227.43	43.8456	761.339	795.911	424.575	497.627	823.225	468.47	498.188	846.476	397.172	412.586	853.059	434.449	305.677	822.769	425.994
128	1.27	693.534	1353.37	145.14	735.056	1341.16	79.1027	734.966	1346.45	211.378	780.585	1150.58	-6.95487	819.415	1156.44	316.6	724.775	1133.12	164.553	604.945	856.196	-135.454	470.101	1063.82	1.56185	520.389	1106.57	-34.3164	459.86	1151.9	12.1608	416.475	1230.97	45.6278	761.344	795.944	424.606	497.607	823.219	468.471	498.222	846.488	397.172	412.602	853.001	434.429	305.655	822.742	425.986
129	1.28	693.689	1353.26	144.668	735.127	1341.03	78.789	734.716	1346.51	211.07	780.708	1150.66	-6.85799	819.294	1156.47	316.581	724.624	1133.17	164.559	603.567	857.029	-134.948	473.416	1066.53	3.6876	523.749	1108.43	-33.5577	464.692	1154.76	13.807	422.656	1234.39	47.207	761.373	795.994	424.668	497.578	823.212	468.475	498.228	846.491	397.171	412.566	852.978	434.4	305.633	822.737	425.969
130	1.29	693.963	1353.12	144.193	735.213	1340.91	78.4535	734.464	1346.56	210.764	780.854	1150.72	-6.74368	819.201	1156.52	316.566	724.464	1133.21	164.545	602.177	857.789	-134.259	477.113	1069.25	5.73779	526.899	1110.14	-32.6709	469.087	1157.73	15.5015	428.854	1237.68	48.5375	761.354	796.047	424.74	497.542	823.251	468.472	498.22	846.498	397.187	412.531	852.994	434.399	305.594	822.75	425.97
131	1.3	694.22	1353.01	143.734	735.3	1340.81	78.1086	734.21	1346.62	210.434	781.031	1150.76	-6.66053	819.151	1156.58	316.555	724.492	1133.19	164.505	600.963	858.505	-133.608	480.81	1071.98	7.90127	530.414	1111.95	-31.7695	473.643	1160.64	16.9608	434.784	1240.92	49.7818	761.43	796.144	424.83	497.524	823.277	468.491	498.228	846.495	397.193	412.527	853	434.403	305.564	822.76	425.961
132	1.31	693.666	1353.21	143.485	735.38	1340.69	77.749	733.959	1346.68	210.085	781.255	1150.81	-6.61132	819.092	1156.64	316.533	724.556	1133.17	164.468	599.72	859.279	-132.952	484.222	1074.63	9.98587	533.699	1113.6	-30.9541	478.769	1163.18	17.8169	440.616	1244.12	50.6225	761.491	796.233	424.921	497.503	823.28	468.488	498.178	846.5	397.187	412.523	853.026	434.412	305.554	822.794	425.968
133	1.32	692.101	1353.72	143.498	735.431	1340.55	77.3862	733.692	1346.73	209.72	781.498	1150.83	-6.55916	819.049	1156.69	316.48	724.553	1133.16	164.448	598.362	860.032	-131.924	487.666	1077.23	11.6988	536.996	1115.32	-30.1202	483.443	1165.71	18.6819	446.274	1247.25	51.0247	761.464	796.311	425.011	497.48	823.298	468.495	498.173	846.499	397.204	412.516	853.045	434.418	305.552	822.812	425.975
134	1.33	691.508	1353.78	143.23	735.463	1340.38	77.0229	733.458	1346.74	209.387	781.717	1150.81	-6.48827	819.053	1156.74	316.433	724.659	1133.1	164.365	597.135	860.698	-130.9	490.905	1079.92	13.33	540.394	1116.97	-29.3993	487.971	1168.26	19.3904	451.801	1250.36	51.1142	761.495	796.437	425.128	497.47	823.302	468.505	498.219	846.523	397.223	412.499	853.059	434.422	305.554	822.837	425.974
135	1.34	691.683	1353.56	142.678	735.624	1340.18	76.5968	733.244	1346.71	209.031	781.977	1150.77	-6.43473	819.11	1156.79	316.383	724.828	1133.09	164.3	595.733	861.355	-129.851	493.92	1082.58	14.8275	543.484	1118.58	-28.6989	492.198	1170.78	20.0058	457.315	1253.54	50.9137	761.561	796.565	425.249	497.5	823.301	468.52	498.237	846.537	397.231	412.516	853.046	434.417	305.577	822.829	425.967
136	1.35	692.105	1353.27	141.955	735.778	1339.97	76.1359	732.991	1346.66	208.625	782.26	1150.75	-6.41039	819.191	1156.87	316.304	724.959	1133.05	164.263	594.147	861.825	-128.748	496.942	1085.13	16.1231	546.618	1119.94	-28.1722	496.192	1173.28	20.5051	462.631	1256.71	50.3573	761.626	796.689	425.357	497.524	823.315	468.535	498.251	846.534	397.237	412.549	853	434.39	305.634	822.786	425.951
137	1.36	692.066	1353.18	141.319	735.818	1339.84	75.7251	732.63	1346.63	208.194	782.531	1150.69	-6.40716	819.246	1156.94	316.232	724.749	1133.17	164.257	592.926	862.159	-127.673	499.855	1087.5	17.288	549.384	1121.32	-27.6542	499.725	1175.85	20.7053	467.609	1259.74	49.5819	761.651	796.803	425.461	497.495	823.364	468.532	498.242	846.55	397.232	412.528	852.962	434.345	305.655	822.77	425.936
138	1.37	691.771	1353.19	140.761	735.779	1339.74	75.3917	732.336	1346.66	207.771	782.837	1150.62	-6.40386	819.334	1157.03	316.169	724.586	1133.37	164.19	591.785	862.544	-126.296	502.341	1089.93	18.4397	552.016	1122.64	-27.1018	503.588	1178.01	20.5818	472.106	1262.72	48.5784	761.667	796.926	425.57	497.517	823.374	468.54	498.309	846.572	397.233	412.534	852.935	434.327	305.672	822.758	425.921
139	1.38	691.474	1353.19	140.245	735.763	1339.64	75.0385	731.994	1346.68	207.315	783.122	1150.56	-6.41462	819.412	1157.1	316.103	724.81	1133.42	164.065	590.709	863.214	-124.85	504.836	1092.18	19.5859	554.715	1123.95	-26.7695	506.81	1180.23	20.5818	476.195	1265.54	47.3918	761.708	797.062	425.666	497.557	823.388	468.55	498.364	846.592	397.252	412.594	852.916	434.321	305.7	822.77	425.911
140	1.39	691.24	1353.12	139.687	735.827	1339.52	74.5756	731.649	1346.71	206.837	783.39	1150.47	-6.44381	819.457	1157.15	316.052	724.966	1133.4	163.997	589.36	863.763	-123.407	507.238	1094.45	20.4709	556.935	1125.21	-26.3158	510.273	1182.2	20.1673	480.043	1268.09	46.2538	761.711	797.193	425.74	497.594	823.4	468.56	498.386	846.594	397.263	412.609	852.915	434.3	305.715	822.773	425.892
141	1.4	691.392	1352.84	138.942	735.906	1339.43	74.0503	731.332	1346.77	206.369	783.624	1150.38	-6.48658	819.518	1157.21	316.013	724.855	1133.43	163.972	587.465	863.969	-121.883	509.386	1096.72	21.4735	558.854	1126.35	-25.9268	512.903	1184.22	20.1633	483.597	1270.58	45.1508	761.685	797.3	425.819	497.564	823.406	468.557	498.358	846.589	397.251	412.581	852.922	434.286	305.677	822.771	425.877
142	1.41	692.142	1352.32	138.018	736.065	1339.34	73.4875	731.088	1346.87	205.896	783.832	1150.29	-6.51295	819.565	1157.27	315.953	724.822	1133.46	163.979	586.073	864.494	-120.489	511.202	1098.7	22.5567	560.97	1127.51	-25.6785	515.965	1185.81	19.8351	486.847	1272.83	44.0752	761.707	797.417	425.911	497.53	823.409	468.562	498.339	846.579	397.253	412.572	852.931	434.305	305.661	822.809	425.891
143	1.42	692.494	1352.19	137.258	736.31	1339.25	72.9342	730.874	1346.95	205.423	784.097	1150.23	-6.56	819.637	1157.35	315.914	724.854	1133.48	163.973	584.551	865.144	-119.072	513.013	1100.67	23.5052	562.857	1128.72	-25.383	518.413	1187.49	19.7158	489.818	1274.9	43.2182	761.705	797.532	425.97	497.565	823.412	468.599	498.372	846.597	397.28	412.59	852.932	434.331	305.694	822.829	425.918
144	1.43	692.792	1352.19	136.542	736.539	1339.16	72.4087	730.7	1347	204.921	784.294	1150.16	-6.6325	819.738	1157.47	315.86	724.836	1133.49	163.911	583.304	865.876	-117.804	514.945	1102.42	24.3554	564.358	1129.75	-25.0161	520.655	1189.04	19.6158	492.638	1276.8	42.4789	761.683	797.635	426.028	497.535	823.433	468.617	498.364	846.616	397.291	412.582	852.916	434.337	305.694	822.822	425.929
145	1.44	692.755	1352.21	135.846	736.747	1339.08	71.8785	730.477	1347.06	204.383	784.431	1150.11	-6.75687	819.693	1157.52	315.781	724.805	1133.5	163.771	582.091	866.481	-116.398	516.711	1104.06	25.2009	565.57	1130.7	-24.8022	522.89	1190.55	19.6895	495.457	1278.6	42.0208	761.657	797.706	426.088	497.487	823.466	468.609	498.329	846.628	397.277	412.576	852.901	434.309	305.655	822.825	425.91
146	1.45	692.2	1352.43	135.288	736.987	1338.98	71.3827	730.241	1347.17	203.844	784.662	1150.12	-6.82874	819.563	1157.53	315.701	724.68	1133.57	163.681	580.736	867.032	-115.122	518.449	1105.6	26.0721	566.856	1131.72	-24.6622	525.135	1191.99	20.0079	498.425	1280.34	42.0721	761.642	797.791	426.149	497.469	823.471	468.597	498.322	846.636	397.279	412.594	852.881	434.286	305.663	822.818	425.881
147	1.46	691.28	1352.86	134.844	737.232	1338.87	70.9492	730.004	1347.28	203.299	785.028	1150.16	-6.77434	819.521	1157.58	315.611	724.592	1133.61	163.56	579.759	867.508	-114.069	519.977	1107.15	27.0356	568.591	1132.45	-24.0584	527.431	1193.32	20.4375	501.572	1281.84	42.5593	761.602	797.876	426.19	497.498	823.496	468.594	498.367	846.638	397.284	412.588	852.864	434.276	305.683	822.805	425.871
148	1.47	691.407	1352.92	134.049	737.462	1338.79	70.496	729.789	1347.43	202.754	785.166	1150.17	-6.81848	819.466	1157.65	315.523	724.46	1133.71	163.466	578.777	867.908	-112.816	521.446	1108.52	28.0909	570.167	1133.37	-23.6126	529.252	1194.68	21.2739	504.662	1283.31	43.4799	761.586	797.965	426.216	497.467	823.52	468.584	498.356	846.647	397.27	412.554	852.858	434.272	305.647	822.793	425.867
149	1.48	691.664	1352.85	133.239	737.702	1338.75	69.9779	729.504	1347.58	202.232	784.863	1150.12	-7.08189	819.358	1157.72	315.448	724.102	1133.83	163.36	577.391	868.48	-111.232	522.898	1109.85	29.3226	571.321	1134.29	-23.3537	531.011	1196.07	22.3202	507.95	1284.63	44.7981	761.574	798.053	426.231	497.401	823.537	468.576	498.341	846.637	397.262	412.529	852.863	434.27	305.614	822.798	425.875
150	1.49	692.118	1352.54	132.47	737.88	1338.76	69.4611	729.194	1347.72	201.769	784.856	1150.12	-7.11476	819.238	1157.78	315.371	723.741	1133.9	163.24	575.727	869.307	-109.754	524.358	1111.14	30.5057	572.32	1134.89	-22.7434	533.722	1197.11	23.0612	511.45	1285.8	46.4854	761.552	798.14	426.229	497.388	823.533	468.579	498.293	846.601	397.263	412.527	852.862	434.281	305.646	822.799	425.881
151	1.5	691.978	1352.74	131.967	738.08	1338.75	68.9785	728.861	1347.86	201.348	784.882	1150.09	-7.0934	819.13	1157.84	315.28	723.518	1133.96	163.149	574.287	870.094	-108.676	526.154	1112.12	31.7706	573.739	1135.39	-21.6437	536.189	1198.22	24.326	515.112	1286.81	48.4029	761.537	798.218	426.249	497.424	823.537	468.592	498.294	846.601	397.276	412.51	852.869	434.308	305.633	822.801	425.915
152	1.51	691.774	1353.08	131.433	738.276	1338.72	68.4546	728.458	1348	200.865	784.885	1150.05	-7.07314	819.006	1157.92	315.188	723.14	1134.04	163.003	572.802	870.702	-107.591	527.956	1113.2	33.0737	575.077	1136.06	-20.6327	538.828	1199.26	25.5721	518.721	1287.65	50.7398	761.545	798.284	426.234	497.438	823.523	468.607	498.295	846.602	397.276	412.52	852.869	434.32	305.623	822.779	425.922
153	1.52	692.338	1352.98	130.482	738.456	1338.73	67.9004	728.046	1348.13	200.351	784.856	1149.99	-7.05809	818.884	1158.02	315.076	722.691	1134.2	162.846	571.529	871.319	-106.729	529.788	1114.15	34.3456	576.228	1136.64	-19.8526	541.152	1200.23	27.2624	522.465	1288.51	53.1902	761.529	798.362	426.207	497.363	823.547	468.582	498.267	846.608	397.25	412.514	852.861	434.288	305.618	822.772	425.879
154	1.53	691.655	1353.47	129.896	738.583	1338.75	67.4085	727.671	1348.29	199.808	784.672	1149.97	-7.15216	818.768	1158.09	314.967	722.349	1134.28	162.686	570.285	872.176	-106.037	531.742	1114.88	35.7769	577.601	1137.28	-19.0757	543.024	1201.36	29.294	526.575	1289.13	55.5237	761.521	798.431	426.172	497.27	823.599	468.551	498.207	846.603	397.225	412.475	852.862	434.264	305.561	822.788	425.876
155	1.54	691.383	1353.63	129.305	738.686	1338.75	66.9111	727.315	1348.43	199.284	784.41	1149.98	-7.30699	818.686	1158.18	314.84	722.696	1134.21	162.505	568.942	873.07	-105.22	533.772	1115.72	37.1763	579.399	1137.67	-18.075	546.048	1202.06	30.7376	530.926	1289.69	57.8814	761.538	798.5	426.13	497.341	823.615	468.539	498.159	846.626	397.213	412.455	852.859	434.269	305.53	822.786	425.871
156	1.55	691.172	1353.74	128.753	738.856	1338.71	66.3686	727.042	1348.55	198.806	784.607	1149.89	-7.10285	818.613	1158.25	314.748	722.922	1134.13	162.253	567.673	873.787	-104.374	535.91	1116.42	38.5581	581.286	1138.02	-17.02	549.816	1202.42	31.9285	535.361	1290.07	60.2109	761.522	798.532	426.083	497.379	823.642	468.544	498.124	846.622	397.2	412.461	852.835	434.255	305.533	822.766	425.865
157	1.56	690.906	1353.87	128.197	738.989	1338.7	65.8479	726.728	1348.58	198.365	784.819	1149.75	-6.83054	818.479	1158.29	314.597	723.026	1134.02	162.054	566.494	874.422	-103.61	537.837	1117.03	39.8958	583.209	1138.34	-15.9147	552.733	1203.08	33.5643	539.779	1290.36	62.4781	761.521	798.545	426.02	497.342	823.614	468.541	498.102	846.596	397.177	412.444	852.808	434.237	305.507	822.751	425.845
158	1.57	690.806	1353.94	127.636	739.002	1338.68	65.4692	726.43	1348.6	198.008	784.969	1149.55	-6.53812	818.323	1158.28	314.461	722.947	1134	162.015	565.382	875.08	-102.995	539.71	1117.79	41.2583	585.174	1138.55	-14.8188	555.16	1203.82	35.4688	544.307	1290.75	64.6671	761.543	798.559	425.941	497.337	823.598	468.526	498.11	846.57	397.181	412.422	852.81	434.256	305.505	822.749	425.854
159	1.58	690.895	1353.98	127.068	738.979	1338.68	65.199	726.45	1348.51	197.362	784.896	1149.42	-6.4459	818.277	1158.28	314.39	722.904	1134.03	161.937	564.184	875.755	-102.225	541.56	1118.52	42.5494	587.339	1138.6	-13.7709	558.749	1204.22	36.5751	548.913	1291.06	66.6084	761.526	798.568	425.869	497.342	823.623	468.559	498.15	846.578	397.192	412.447	852.817	434.288	305.512	822.737	425.891
160	1.59	691.018	1353.95	126.498	738.999	1338.67	64.936	726.781	1348.25	196.281	784.612	1149.51	-6.69004	818.243	1158.28	314.296	722.95	1134.02	161.834	562.992	876.356	-101.353	543.38	1119.04	43.6485	589.46	1138.51	-12.7987	562.582	1204.36	37.287	553.493	1291.31	68.2383	761.553	798.572	425.808	497.377	823.611	468.547	498.165	846.598	397.19	412.491	852.817	434.283	305.528	822.74	425.886
161	1.6	690.973	1353.92	126.004	739.078	1338.64	64.6679	726.621	1348.21	195.704	784.524	1149.47	-6.73634	818.188	1158.25	314.135	723.048	1134.04	161.684	562.098	876.889	-100.516	544.966	1119.74	44.5395	591.437	1138.31	-11.8473	565.673	1204.76	38.3845	557.907	1291.55	69.4866	761.571	798.575	425.726	497.381	823.594	468.511	498.161	846.619	397.164	412.474	852.822	434.263	305.52	822.743	425.875
162	1.61	690.828	1353.96	125.61	739.131	1338.62	64.4595	726.289	1348.26	195.283	784.47	1149.36	-6.74012	818.191	1158.24	313.999	723.208	1134.06	161.591	561.341	877.406	-99.745	546.75	1120.43	45.3426	593.25	1138.39	-11.1657	568.301	1205.34	39.4277	562.147	1291.76	70.4763	761.581	798.566	425.65	497.41	823.57	468.506	498.154	846.619	397.143	412.469	852.817	434.252	305.502	822.758	425.871
163	1.62	690.566	1354.02	125.333	739.17	1338.61	64.2805	726.014	1348.28	194.969	784.492	1149.24	-6.72021	818.305	1158.29	314.07	723.319	1134.03	161.52	560.523	877.787	-98.9724	548.719	1120.96	46.1263	595.048	1138.23	-10.4388	571.221	1205.68	40.0562	566.337	1292.08	71.2245	761.582	798.551	425.583	497.428	823.588	468.505	498.201	846.62	397.14	412.514	852.818	434.252	305.552	822.769	425.888
164	1.63	690.331	1354.04	125.076	739.18	1338.56	64.0929	725.762	1348.29	194.731	784.57	1149.12	-6.69385	818.355	1158.3	314.056	723.219	1134.09	161.529	559.588	878.043	-98.0184	550.651	1121.35	46.7195	597.161	1137.91	-9.68724	573.766	1205.82	40.4718	570.189	1292.39	71.62	761.602	798.555	425.512	497.459	823.581	468.505	498.179	846.609	397.134	412.515	852.802	434.237	305.565	822.763	425.892
165	1.64	690.117	1354	124.868	739.119	1338.51	63.9432	725.495	1348.29	194.599	784.628	1149	-6.66868	818.375	1158.3	314.016	723.336	1134.04	161.493	558.813	878.229	-97.1003	552.505	1121.74	47.2114	598.902	1137.73	-9.32106	576.613	1205.85	40.5176	573.663	1292.56	71.7014	761.606	798.555	425.439	497.44	823.553	468.476	498.149	846.608	397.111	412.485	852.789	434.229	305.518	822.752	425.886
166	1.65	690.038	1353.96	124.723	738.998	1338.49	63.852	725.248	1348.3	194.525	784.748	1148.89	-6.64393	818.461	1158.29	314.015	723.449	1133.94	161.487	558.515	878.327	-96.3948	554.095	1122.24	47.7585	600.599	1137.56	-9.05434	579.788	1205.87	40.1054	577.093	1292.75	71.4224	761.601	798.555	425.38	497.421	823.542	468.457	498.152	846.589	397.109	412.474	852.783	434.224	305.493	822.749	425.884
167	1.66	689.955	1353.92	124.646	738.914	1338.48	63.8093	725.09	1348.28	194.484	784.914	1148.77	-6.60459	818.553	1158.29	314.054	723.609	1133.91	161.464	558.402	878.343	-95.6842	555.508	1122.76	48.1961	602.323	1137.36	-8.85109	582.094	1206.22	39.9015	580.312	1293.06	70.8428	761.622	798.574	425.364	497.427	823.546	468.485	498.164	846.586	397.122	412.502	852.784	434.247	305.546	822.739	425.9
168	1.67	689.752	1353.92	124.646	738.785	1338.49	63.7834	724.918	1348.24	194.442	785.068	1148.66	-6.56603	818.605	1158.26	314.005	723.653	1133.96	161.415	558.204	878.358	-94.8985	556.887	1123.29	48.364	603.861	1137.09	-8.7184	583.848	1206.51	39.6791	583.39	1293.37	69.7677	761.632	798.598	425.346	497.402	823.572	468.484	498.174	846.608	397.122	412.497	852.794	434.255	305.564	822.751	425.896
169	1.68	689.425	1353.99	124.612	738.603	1338.53	63.762	724.637	1348.22	194.449	785.234	1148.54	-6.5288	818.677	1158.25	313.943	723.469	1134.11	161.486	557.776	878.373	-94.0457	558.105	1123.93	48.2927	605.242	1136.8	-8.69332	585.833	1206.42	39.027	586.201	1293.8	68.4365	761.586	798.613	425.334	497.373	823.603	468.461	498.156	846.629	397.118	412.47	852.817	434.258	305.544	822.764	425.894
170	1.69	689.268	1354.01	124.582	738.456	1338.58	63.7517	724.423	1348.21	194.442	785.463	1148.39	-6.5166	818.836	1158.3	314.029	723.521	1134.15	161.473	557.454	878.301	-93.3021	559.309	1124.54	48.1442	606.831	1136.45	-8.70816	587.351	1206.68	38.5946	588.877	1294.31	66.8995	761.58	798.626	425.363	497.383	823.59	468.467	498.191	846.647	397.127	412.476	852.818	434.256	305.545	822.771	425.877
171	1.7	689.221	1353.99	124.56	738.398	1338.61	63.7406	724.299	1348.16	194.445	785.789	1148.22	-6.53203	818.973	1158.3	314.035	723.717	1134.16	161.425	557.42	878.155	-92.665	560.32	1124.98	48.0209	608.489	1136.01	-8.69053	589.775	1206.76	37.6697	591.673	1294.65	65.1898	761.566	798.637	425.41	497.467	823.577	468.485	498.287	846.651	397.159	412.527	852.807	434.258	305.6	822.757	425.867
172	1.71	689.384	1353.76	124.411	738.314	1338.62	63.7192	724.124	1348.07	194.405	786.108	1148.04	-6.52942	818.996	1158.3	314.161	723.836	1134.13	161.345	557.569	877.988	-92.1164	560.981	1125.32	47.9145	610.022	1135.51	-8.65153	592.127	1206.76	36.6806	594.144	1294.9	63.7074	761.563	798.669	425.486	497.483	823.575	468.504	498.271	846.628	397.161	412.521	852.786	434.25	305.6	822.743	425.868
173	1.72	689.706	1353.47	124.211	738.269	1338.64	63.6899	723.929	1347.96	194.36	786.428	1147.88	-6.52906	819.039	1158.31	314.239	723.852	1134.12	161.331	557.799	877.86	-91.6774	561.581	1125.64	47.7644	611.356	1134.98	-8.51381	593.537	1206.95	36.2632	596.354	1295.09	62.3619	761.569	798.718	425.601	497.456	823.573	468.515	498.217	846.609	397.161	412.482	852.766	434.243	305.556	822.735	425.861
174	1.73	689.354	1353.6	124.215	738.271	1338.66	63.6537	723.713	1347.88	194.304	786.751	1147.71	-6.56004	819.047	1158.33	314.297	723.925	1134.13	161.306	558.089	877.768	-91.3444	562.349	1125.88	47.6088	612.547	1134.41	-8.24437	595.026	1206.78	36.0028	598.587	1295.17	61.2467	761.59	798.798	425.758	497.419	823.564	468.536	498.18	846.59	397.181	412.491	852.736	434.235	305.539	822.716	425.857
175	1.74	689.831	1353.22	123.879	738.38	1338.73	63.5882	723.507	1347.83	194.213	787.113	1147.58	-6.54726	819.047	1158.35	314.328	724.051	1134.11	161.28	558.39	877.693	-91.1248	563.204	1126	47.5683	613.704	1133.82	-7.81368	596.586	1206.51	35.8975	600.541	1295.12	60.6555	761.603	798.893	425.96	497.395	823.562	468.57	498.166	846.569	397.204	412.483	852.71	434.225	305.53	822.709	425.866
176	1.75	689.898	1353.19	123.604	738.444	1338.83	63.4728	723.253	1347.81	194.087	787.442	1147.47	-6.51848	818.99	1158.39	314.365	724.138	1134.13	161.263	558.665	877.68	-91.0122	563.859	1126.04	47.6311	614.912	1133.25	-7.16379	598.169	1206.18	35.9293	602.224	1294.86	60.465	761.583	798.984	426.168	497.348	823.618	468.594	498.138	846.569	397.202	412.463	852.723	434.22	305.498	822.729	425.855
177	1.76	689.879	1353.21	123.3	738.482	1338.94	63.3346	722.919	1347.8	193.913	787.772	1147.4	-6.49088	818.877	1158.44	314.384	724.219	1134.13	161.192	558.7	877.496	-90.941	564.342	1126.06	47.7943	616.023	1132.75	-6.37262	599.581	1205.84	36.1249	603.66	1294.53	60.6698	761.539	799.067	426.389	497.294	823.661	468.592	498.129	846.581	397.204	412.419	852.756	434.216	305.484	822.752	425.835
178	1.77	689.99	1353.24	122.969	738.601	1339.03	63.1794	722.616	1347.81	193.755	788.125	1147.38	-6.43876	818.817	1158.48	314.404	724.27	1134.11	161.123	558.481	877.077	-90.865	564.807	1125.97	48.1028	617.012	1132.37	-5.65047	600.706	1205.5	36.6706	604.958	1294.12	61.3587	761.491	799.146	426.588	497.224	823.688	468.607	498.13	846.603	397.234	412.386	852.786	434.219	305.437	822.781	425.812
179	1.78	689.728	1353.44	122.75	738.726	1339.08	63.0265	722.369	1347.78	193.569	788.451	1147.32	-6.36293	818.783	1158.55	314.414	724.277	1134.18	161.06	558.839	877.37	-91.0521	565.221	1125.76	48.6366	617.998	1132.05	-4.94569	601.612	1205.15	37.6943	606.066	1293.62	62.6356	761.464	799.203	426.784	497.253	823.706	468.645	498.152	846.632	397.259	412.386	852.81	434.237	305.428	822.798	425.816
180	1.79	689.256	1353.67	122.565	738.857	1339.11	62.8144	722.116	1347.72	193.343	788.838	1147.22	-6.29024	818.733	1158.58	314.407	724.224	1134.17	161.011	559.368	878.11	-91.4454	565.596	1125.44	49.2873	619.005	1131.7	-4.08062	602.545	1204.76	38.8056	607.059	1293.01	64.2002	761.456	799.25	426.982	497.218	823.71	468.664	498.152	846.632	397.278	412.382	852.805	434.222	305.462	822.782	425.805
181	1.8	689.828	1353.26	122.034	738.972	1339.09	62.6017	721.888	1347.62	193.121	789.241	1147.1	-6.2275	818.609	1158.59	314.4	724.387	1134.18	160.86	559.548	878.472	-91.7285	565.944	1125.09	49.9935	619.828	1131.32	-3.11992	603.562	1204.29	39.7624	608.068	1292.33	65.8419	761.425	799.256	427.166	497.163	823.709	468.688	498.155	846.586	397.31	412.377	852.782	434.207	305.447	822.759	425.78
182	1.81	689.972	1353.02	121.691	739.073	1339.05	62.3912	721.752	1347.54	192.928	789.619	1146.95	-6.15222	818.559	1158.6	314.433	724.498	1134.14	160.781	559.632	878.774	-91.9594	566.368	1124.74	50.714	620.523	1130.94	-2.23658	604.383	1203.81	40.9361	609.083	1291.65	67.6441	761.402	799.258	427.301	497.155	823.701	468.697	498.152	846.559	397.333	412.367	852.748	434.204	305.464	822.706	425.782
183	1.82	689.97	1352.9	121.459	739.138	1339.01	62.2029	721.617	1347.48	192.756	789.964	1146.8	-6.08519	818.552	1158.62	314.458	724.485	1134.12	160.769	559.682	879.108	-92.147	566.71	1124.48	51.3648	621.202	1130.57	-1.37975	605.104	1203.41	42.1912	610.09	1290.99	69.409	761.359	799.258	427.377	497.155	823.712	468.713	498.203	846.548	397.34	412.366	852.692	434.196	305.457	822.691	425.782
184	1.83	689.894	1352.84	121.246	739.2	1338.97	62.0082	721.463	1347.46	192.583	790.238	1146.65	-6.05793	818.501	1158.63	314.454	724.328	1134.17	160.786	559.668	879.449	-92.3106	566.97	1124.32	51.977	621.779	1130.21	-0.35096	606.011	1203.13	43.1588	611.18	1290.48	71.0049	761.316	799.261	427.414	497.144	823.747	468.714	498.185	846.554	397.314	412.357	852.666	434.179	305.434	822.693	425.768
185	1.84	689.81	1352.82	121.035	739.179	1338.98	61.8391	721.273	1347.46	192.41	790.476	1146.51	-6.02049	818.454	1158.63	314.446	724.274	1134.25	160.76	559.563	879.825	-92.4203	567.184	1124.37	52.5506	622.373	1129.82	0.80466	607.021	1202.88	44.0203	612.597	1290.14	72.0995	761.298	799.266	427.46	497.081	823.757	468.701	498.137	846.545	397.3	412.336	852.681	434.158	305.404	822.723	425.758
186	1.85	689.666	1352.87	120.874	739.151	1339	61.7151	721.076	1347.48	192.28	790.736	1146.39	-5.9782	818.396	1158.62	314.42	724.168	1134.34	160.696	559.353	880.245	-92.4306	567.396	1124.62	53.1184	622.943	1129.48	1.78796	608.04	1202.67	44.8008	614.264	1289.96	72.8188	761.289	799.263	427.483	497.043	823.783	468.677	498.148	846.554	397.305	412.316	852.719	434.156	305.391	822.736	425.754
187	1.86	689.536	1352.93	120.734	739.138	1339.05	61.6252	720.914	1347.51	192.185	791.017	1146.29	-5.93414	818.391	1158.63	314.378	724.103	1134.39	160.648	558.713	880.536	-92.2363	567.705	1125.04	53.6781	623.662	1129.23	2.5835	609.279	1202.55	45.4627	616.122	1289.92	73.3604	761.326	799.281	427.465	497.005	823.817	468.667	498.09	846.556	397.277	412.305	852.748	434.156	305.367	822.741	425.757
188	1.87	689.397	1352.99	120.623	739.115	1339.12	61.5537	720.74	1347.53	192.095	791.301	1146.19	-5.89311	818.411	1158.65	314.332	724.124	1134.38	160.607	557.587	880.628	-91.8558	568.174	1125.56	54.2199	624.531	1129.17	3.29332	610.394	1202.6	46.0428	617.959	1289.92	73.8241	761.338	799.289	427.405	496.969	823.81	468.656	498.087	846.55	397.272	412.311	852.76	434.158	305.354	822.75	425.744
189	1.88	689.2	1353.04	120.567	739.045	1339.16	61.501	720.554	1347.54	192.012	791.517	1146.1	-5.85058	818.349	1158.66	314.269	723.964	1134.4	160.576	556.705	881.067	-91.4598	568.817	1126.02	54.7484	625.429	1129.35	3.83508	611.455	1202.73	46.5063	619.559	1290	74.3821	761.352	799.302	427.311	496.944	823.785	468.631	498.078	846.554	397.263	412.298	852.768	434.165	305.358	822.754	425.744
190	1.89	689.128	1353.07	120.515	738.961	1339.2	61.4876	720.399	1347.55	191.961	791.685	1145.97	-5.84391	818.298	1158.65	314.145	723.767	1134.44	160.583	555.978	881.621	-91.069	569.623	1126.42	55.2005	626.171	1129.62	4.17283	612.686	1202.9	46.8125	621.269	1290.24	74.844	761.347	799.305	427.204	497.005	823.757	468.632	498.085	846.534	397.245	412.291	852.762	434.167	305.354	822.738	425.764
191	1.9	689.027	1353.13	120.514	738.895	1339.25	61.4517	720.337	1347.54	191.945	791.846	1145.86	-5.84119	818.384	1158.67	313.966	723.769	1134.42	160.538	555.307	882.27	-90.6058	570.609	1126.93	55.6016	626.796	1129.88	4.30929	614.025	1203.16	46.988	623.214	1290.58	74.9889	761.384	799.334	427.09	497.081	823.742	468.632	498.126	846.526	397.246	412.304	852.733	434.171	305.365	822.723	425.788
192	1.91	688.98	1353.15	120.507	738.792	1339.32	61.4435	720.235	1347.53	191.94	791.968	1145.76	-5.80956	818.383	1158.66	313.84	723.604	1134.52	160.5	554.589	883.044	-90.0975	571.686	1127.62	55.9426	627.486	1130.21	4.28778	615.46	1203.64	46.9729	625.381	1291.01	74.8537	761.425	799.355	426.977	497.126	823.712	468.621	498.111	846.527	397.251	412.307	852.696	434.174	305.396	822.703	425.786
193	1.92	688.942	1353.15	120.492	738.683	1339.39	61.4554	720.096	1347.52	191.911	792.098	1145.68	-5.77824	818.315	1158.65	313.723	723.458	1134.56	160.486	553.748	883.865	-89.4751	572.904	1128.53	56.2207	628.282	1130.59	4.2014	617.017	1204.26	46.7642	627.832	1291.54	74.5463	761.434	799.361	426.861	497.098	823.699	468.607	498.037	846.526	397.23	412.296	852.68	434.164	305.352	822.701	425.786
194	1.93	688.88	1353.16	120.513	738.561	1339.48	61.4787	720.004	1347.52	191.925	792.221	1145.6	-5.75134	818.334	1158.69	313.677	723.519	1134.55	160.456	552.708	884.631	-88.7522	574.365	1129.37	56.4077	629.087	1130.97	4.14238	618.619	1204.87	46.4666	630.673	1292.07	74.0307	761.448	799.376	426.748	497.124	823.69	468.598	498.06	846.551	397.242	412.306	852.668	434.151	305.354	822.709	425.772
195	1.94	688.384	1353.43	120.699	738.482	1339.58	61.5003	719.91	1347.52	191.961	792.352	1145.55	-5.74758	818.362	1158.71	313.709	723.551	1134.62	160.407	551.733	885.307	-88.0736	575.708	1130.21	56.6036	629.93	1131.33	4.09748	620.484	1205.35	46.0581	633.588	1292.62	73.3549	761.479	799.379	426.647	497.178	823.72	468.602	498.08	846.554	397.245	412.337	852.676	434.149	305.385	822.698	425.763
196	1.95	687.708	1353.78	120.923	738.327	1339.69	61.5568	719.812	1347.54	192.014	792.492	1145.51	-5.72267	818.365	1158.72	313.652	723.59	1134.61	160.398	550.947	886.061	-87.5069	576.697	1131.26	56.8716	630.801	1131.69	4.01802	622.467	1205.7	45.6637	636.656	1293.11	72.7275	761.502	799.388	426.527	497.195	823.735	468.59	498.081	846.551	397.213	412.331	852.713	434.166	305.369	822.721	425.788
197	1.96	688.259	1353.54	120.759	738.152	1339.79	61.6303	719.709	1347.56	192.078	792.582	1145.47	-5.68899	818.39	1158.7	313.619	723.553	1134.66	160.377	550.099	886.964	-86.7994	577.699	1132.27	57.0859	631.851	1132.06	3.80447	624.484	1206.03	45.2981	639.601	1293.46	72.3068	761.515	799.392	426.403	497.189	823.747	468.571	498.06	846.569	397.193	412.3	852.752	434.185	305.324	822.767	425.802
198	1.97	688.321	1353.55	120.772	738.07	1339.86	61.6618	719.598	1347.53	192.098	792.674	1145.45	-5.66959	818.429	1158.68	313.524	723.55	1134.72	160.334	549.372	887.757	-86.1506	579.03	1133.06	57.2045	633.002	1132.32	3.49045	626.271	1206.51	45.0914	642.776	1293.75	71.8683	761.515	799.383	426.289	497.164	823.744	468.57	498.009	846.589	397.184	412.309	852.764	434.198	305.325	822.784	425.811
199	1.98	688.238	1353.53	120.818	738.047	1339.91	61.6971	719.542	1347.47	192.158	792.773	1145.41	-5.65907	818.491	1158.67	313.43	723.626	1134.73	160.334	548.761	888.292	-85.6406	580.364	1133.66	57.2675	633.908	1132.48	3.29067	628.099	1206.84	44.7942	645.321	1293.95	71.6762	761.488	799.375	426.204	497.177	823.749	468.574	497.998	846.602	397.187	412.318	852.764	434.21	305.338	822.775	425.804
200	1.99	688.092	1353.52	120.884	737.984	1339.94	61.7618	719.486	1347.43	192.234	792.824	1145.37	-5.63149	818.516	1158.69	313.481	723.718	1134.68	160.323	548.044	888.684	-85.1736	581.341	1134.06	57.2922	634.494	1132.56	3.30718	629.42	1207.06	44.6572	647.72	1294.04	71.4396	761.483	799.356	426.132	497.163	823.747	468.575	498.007	846.599	397.195	412.307	852.735	434.212	305.31	822.765	425.809
201	2	687.964	1353.55	120.963	737.918	1339.99	61.8436	719.442	1347.4	192.292	792.863	1145.32	-5.60129	818.535	1158.66	313.511	723.645	1134.73	160.372	547.414	888.995	-84.8119	581.972	1134.38	57.3386	634.977	1132.55	3.41705	630.283	1207.17	44.5909	649.659	1293.98	71.3226	761.47	799.318	426.071	497.138	823.724	468.572	497.983	846.583	397.19	412.308	852.706	434.208	305.293	822.761	425.817
202	2.01	688.117	1353.52	121.011	737.926	1340.06	61.9102	719.493	1347.37	192.371	792.93	1145.25	-5.57568	818.626	1158.62	313.524	723.663	1134.79	160.401	547.101	889.199	-84.6074	582.278	1134.6	57.408	635.32	1132.46	3.59302	630.813	1207.2	44.6699	650.99	1293.87	71.5022	761.45	799.267	426.025	497.133	823.696	468.561	498.02	846.589	397.2	412.342	852.678	434.193	305.36	822.718	425.823
203	2.02	688.27	1353.56	121.063	737.975	1340.11	61.994	719.535	1347.32	192.462	793.011	1145.17	-5.50614	818.762	1158.61	313.574	723.827	1134.84	160.396	547.025	889.267	-84.5045	582.281	1134.68	57.5481	635.408	1132.42	3.83606	631.066	1207.21	44.8683	651.956	1293.72	72.088	761.472	799.235	425.997	497.175	823.707	468.555	498.046	846.597	397.196	412.357	852.656	434.184	305.373	822.7	425.82
204	2.03	688.396	1353.63	121.179	738.052	1340.19	62.1013	719.609	1347.33	192.612	793.095	1145.08	-5.45586	818.843	1158.61	313.599	723.789	1134.9	160.429	547.104	889.223	-84.4719	581.982	1134.63	57.7674	635.272	1132.43	4.1005	630.953	1207.2	45.2762	652.399	1293.57	73.0643	761.474	799.202	425.968	497.202	823.678	468.568	498.083	846.598	397.197	412.362	852.655	434.183	305.394	822.69	425.811
205	2.04	688.096	1353.94	121.464	738.095	1340.33	62.269	719.683	1347.37	192.776	793.194	1145.01	-5.42359	818.946	1158.58	313.607	723.841	1134.93	160.41	547.291	889.034	-84.4484	581.512	1134.5	58.0355	634.922	1132.46	4.42543	630.555	1207.09	45.7774	652.172	1293.42	74.2647	761.446	799.137	425.956	497.256	823.637	468.563	498.086	846.569	397.184	412.369	852.687	434.188	305.421	822.675	425.8
206	2.05	687.467	1354.44	121.945	738.128	1340.46	62.4945	719.803	1347.37	193.013	793.248	1144.95	-5.41617	819.028	1158.53	313.646	723.963	1134.91	160.43	547.597	888.751	-84.4135	580.877	1134.28	58.323	634.405	1132.43	4.75677	630.022	1206.89	46.2798	651.844	1293.2	75.4039	761.472	799.124	425.971	497.26	823.632	468.563	498.102	846.567	397.194	412.366	852.736	434.211	305.404	822.687	425.824
207	2.06	687.438	1354.6	122.315	738.152	1340.57	62.7737	719.882	1347.34	193.298	793.28	1144.88	-5.40053	819.143	1158.5	313.706	724.029	1134.93	160.443	547.953	888.438	-84.4112	580.234	1133.95	58.5921	633.882	1132.24	5.01935	629.557	1206.61	46.6919	651.889	1292.88	76.441	761.49	799.095	425.977	497.274	823.632	468.57	498.126	846.567	397.207	412.383	852.751	434.233	305.394	822.716	425.844
208	2.07	687.39	1354.7	122.695	738.209	1340.68	63.0426	719.972	1347.3	193.591	793.328	1144.83	-5.38833	819.244	1158.47	313.745	724.03	1134.91	160.463	548.343	888.108	-84.4418	579.639	1133.6	58.8029	633.399	1131.92	5.27072	629.24	1206.33	46.9922	652.242	1292.5	77.4273	761.5	799.07	426.014	497.267	823.608	468.557	498.114	846.576	397.202	412.401	852.755	434.234	305.403	822.721	425.836
209	2.08	687.174	1354.79	123.107	738.215	1340.74	63.3005	720.02	1347.26	193.899	793.356	1144.78	-5.36966	819.278	1158.44	313.81	724.075	1134.85	160.497	548.879	887.665	-84.4451	579.173	1133.24	58.9207	633.073	1131.6	5.49293	629.047	1206.05	47.2319	652.935	1292.03	78.2972	761.482	799.059	426.075	497.251	823.623	468.572	498.079	846.577	397.204	412.376	852.759	434.22	305.39	822.72	425.819
210	2.09	686.982	1354.85	123.557	738.208	1340.78	63.5635	720.055	1347.2	194.215	793.352	1144.71	-5.3482	819.313	1158.43	313.836	724.104	1134.79	160.556	549.48	887.061	-84.3437	578.931	1132.8	58.9013	632.902	1131.26	5.6689	628.995	1205.76	47.4665	653.938	1291.53	79.0037	761.482	799.068	426.144	497.233	823.649	468.591	498.112	846.588	397.243	412.348	852.752	434.218	305.382	822.751	425.821
211	2.1	686.99	1354.79	123.898	738.181	1340.78	63.8153	720.079	1347.11	194.511	793.324	1144.62	-5.32995	819.343	1158.42	313.811	724.077	1134.82	160.614	550.081	886.432	-84.1587	578.814	1132.37	58.8132	632.911	1130.89	5.79764	629.053	1205.45	47.728	655.258	1291.03	79.6002	761.494	799.075	426.237	497.226	823.672	468.597	498.121	846.621	397.254	412.348	852.746	434.222	305.392	822.749	425.832
212	2.11	686.902	1354.68	124.239	738.105	1340.78	64.0353	720.106	1347	194.766	793.324	1144.53	-5.29255	819.348	1158.42	313.859	724.078	1134.75	160.65	550.537	885.914	-83.9013	578.774	1132.09	58.6713	633.037	1130.57	5.88503	629.324	1205.17	47.848	656.761	1290.58	80.1537	761.474	799.073	426.337	497.206	823.665	468.603	498.103	846.611	397.257	412.371	852.737	434.222	305.39	822.748	425.837
213	2.12	686.898	1354.55	124.516	737.954	1340.77	64.2353	720.03	1346.87	195.019	793.361	1144.43	-5.25456	819.334	1158.43	313.913	724.035	1134.71	160.656	550.799	885.596	-83.61	578.775	1131.97	58.5323	633.231	1130.31	5.95501	629.773	1204.92	47.869	658.232	1290.19	80.575	761.436	799.051	426.443	497.232	823.662	468.625	498.088	846.578	397.257	412.358	852.755	434.218	305.357	822.755	425.831
214	2.13	686.852	1354.37	124.739	737.763	1340.75	64.4429	719.966	1346.7	195.238	793.414	1144.34	-5.19568	819.279	1158.47	313.949	724.022	1134.71	160.649	550.932	885.457	-83.324	578.895	1131.97	58.4726	633.531	1130.11	6.05702	630.203	1204.73	47.885	659.632	1289.87	80.8561	761.407	799.063	426.545	497.229	823.647	468.641	498.149	846.555	397.282	412.341	852.75	434.22	305.356	822.733	425.833
215	2.14	686.778	1354.2	124.892	737.56	1340.71	64.5859	719.864	1346.54	195.386	793.585	1144.28	-5.1468	819.222	1158.5	313.987	724.036	1134.69	160.664	550.947	885.475	-83.0473	579.076	1132.1	58.4628	633.955	1129.98	6.19177	630.67	1204.63	47.9396	660.796	1289.68	81.0434	761.405	799.088	426.674	497.185	823.641	468.647	498.141	846.538	397.286	412.349	852.729	434.216	305.361	822.708	425.833
216	2.15	686.613	1354.02	125.005	737.317	1340.65	64.6716	719.699	1346.37	195.474	793.832	1144.23	-5.08288	819.114	1158.51	314.074	724.058	1134.69	160.678	550.814	885.641	-82.7472	579.332	1132.31	58.4727	634.402	1129.92	6.34638	631.127	1204.6	48.0952	661.733	1289.64	81.2284	761.371	799.114	426.809	497.139	823.637	468.656	498.083	846.516	397.275	412.349	852.726	434.221	305.342	822.712	425.827
217	2.16	686.263	1353.92	125.074	737.099	1340.59	64.6889	719.511	1346.23	195.531	794.122	1144.2	-5.00811	819.029	1158.54	314.149	724.056	1134.68	160.722	550.579	885.973	-82.441	579.623	1132.64	58.5432	634.8	1130.02	6.53088	631.525	1204.76	48.2826	662.437	1289.73	81.4745	761.325	799.153	426.948	497.108	823.659	468.671	498.047	846.517	397.293	412.333	852.73	434.216	305.338	822.696	425.83
218	2.17	686.154	1353.76	125.066	736.885	1340.51	64.6724	719.299	1346.14	195.557	794.417	1144.18	-4.94753	818.996	1158.59	314.123	724.153	1134.66	160.712	550.316	886.43	-82.1556	579.945	1133.05	58.5971	635.223	1130.25	6.72755	631.874	1205.05	48.4809	662.957	1289.97	81.6969	761.312	799.206	427.074	497.076	823.7	468.685	498.087	846.538	397.323	412.327	852.727	434.217	305.344	822.691	425.82
219	2.18	686.09	1353.63	125.077	736.673	1340.43	64.6287	719.155	1346.08	195.547	794.711	1144.2	-4.88979	818.928	1158.64	314.145	724.262	1134.66	160.693	550.066	886.979	-81.9755	580.169	1133.55	58.5954	635.688	1130.6	6.88135	632.269	1205.44	48.598	663.284	1290.37	81.8346	761.289	799.259	427.194	497.058	823.738	468.696	498.073	846.559	397.308	412.31	852.745	434.206	305.326	822.716	425.803
220	2.19	685.828	1353.62	125.11	736.435	1340.38	64.602	719.037	1346.06	195.536	794.967	1144.25	-4.80061	818.848	1158.67	314.227	724.231	1134.79	160.713	549.803	887.634	-81.9125	580.338	1134.15	58.5791	636.091	1131.01	7.00727	632.629	1205.97	48.6214	663.349	1290.91	81.9322	761.296	799.322	427.294	497.01	823.758	468.698	498.064	846.579	397.32	412.274	852.778	434.198	305.289	822.747	425.784
221	2.2	685.656	1353.63	125.13	736.208	1340.38	64.5944	718.948	1346.08	195.559	795.167	1144.31	-4.71619	818.761	1158.71	314.217	724.283	1134.82	160.698	549.519	888.327	-81.9339	580.362	1134.85	58.5901	636.341	1131.46	7.13594	632.882	1206.48	48.6057	663.211	1291.47	82.013	761.288	799.362	427.396	496.966	823.78	468.715	498.093	846.597	397.359	412.238	852.808	434.204	305.257	822.764	425.776
222	2.21	685.669	1353.66	125.159	736.031	1340.43	64.6068	718.909	1346.1	195.599	795.332	1144.39	-4.65244	818.719	1158.74	314.183	724.359	1134.79	160.65	549.189	889.133	-82.005	580.352	1135.56	58.5769	636.448	1131.88	7.48678	632.969	1206.94	48.6265	663.079	1292	82.0456	761.251	799.384	427.456	496.953	823.794	468.727	498.039	846.612	397.361	412.238	852.812	434.212	305.222	822.766	425.756
223	2.22	685.762	1353.69	125.233	735.936	1340.49	64.646	718.96	1346.13	195.651	795.434	1144.48	-4.59334	818.699	1158.77	314.265	724.317	1134.77	160.659	548.756	889.981	-82.0062	580.301	1136.34	58.4879	636.468	1132.19	8.0983	632.92	1207.4	48.7469	662.996	1292.52	82.0228	761.205	799.383	427.484	496.954	823.796	468.722	498.031	846.629	397.351	412.252	852.802	434.213	305.218	822.753	425.752
224	2.23	685.833	1353.79	125.351	735.866	1340.54	64.7549	719.048	1346.18	195.73	795.466	1144.56	-4.51656	818.638	1158.73	314.279	724.215	1134.69	160.727	548.232	890.824	-82.0018	580.171	1137.11	58.3938	636.505	1132.7	8.30862	632.91	1207.88	48.7919	662.774	1293.09	81.9661	761.193	799.362	427.492	496.916	823.778	468.726	498.029	846.578	397.353	412.241	852.79	434.217	305.239	822.725	425.772
225	2.24	685.906	1353.94	125.498	735.807	1340.65	64.8959	719.229	1346.25	195.894	795.449	1144.65	-4.41698	818.57	1158.69	314.299	724.19	1134.66	160.75	547.591	891.632	-82.0793	579.86	1137.84	58.318	636.562	1133.33	8.28315	632.712	1208.38	48.916	662.335	1293.67	81.8379	761.218	799.316	427.488	496.974	823.742	468.75	498.061	846.551	397.377	412.239	852.776	434.249	305.261	822.703	425.796
226	2.25	686.003	1354.1	125.69	735.818	1340.78	65.0499	719.45	1346.35	196.069	795.384	1144.75	-4.33512	818.546	1158.66	314.322	724.215	1134.66	160.755	547.056	892.296	-82.3247	579.527	1138.44	58.245	636.441	1133.7	8.46692	632.418	1208.85	49.0518	661.778	1294.25	81.6286	761.255	799.263	427.446	497.046	823.721	468.76	498.085	846.54	397.39	412.261	852.761	434.282	305.294	822.679	425.828
227	2.26	686.23	1354.32	125.886	735.95	1340.89	65.1802	719.74	1346.44	196.204	795.273	1144.84	-4.29314	818.513	1158.63	314.325	724.209	1134.7	160.762	546.615	892.889	-82.6739	579.185	1138.9	58.164	636.292	1133.98	8.66009	632.275	1209.27	49.0293	661.129	1294.8	81.3278	761.278	799.206	427.364	497.086	823.703	468.743	498.087	846.553	397.378	412.264	852.749	434.273	305.301	822.678	425.814
228	2.27	686.33	1354.57	126.163	736.055	1341.01	65.36	720.065	1346.57	196.385	795.072	1144.95	-4.23882	818.486	1158.59	314.306	724.191	1134.72	160.792	546.166	893.419	-83.0507	578.692	1139.32	58.111	636.093	1134.22	8.84756	631.966	1209.64	49.0158	660.296	1295.35	81.0093	761.289	799.146	427.238	497.084	823.694	468.722	498.089	846.562	397.355	412.258	852.764	434.256	305.269	822.688	425.81
229	2.28	686.177	1354.87	126.557	736.153	1341.16	65.5726	720.493	1346.72	196.611	794.834	1145.05	-4.17292	818.557	1158.57	314.311	723.996	1134.8	160.901	545.714	893.867	-83.3732	578.1	1139.74	58.0969	635.803	1134.41	9.01713	631.456	1209.98	49.0139	659.372	1295.93	80.5585	761.275	799.067	427.065	497.085	823.682	468.707	498.068	846.567	397.36	412.236	852.807	434.272	305.258	822.711	425.827
230	2.29	686.688	1354.88	126.825	736.248	1341.31	65.784	720.893	1346.87	196.857	794.586	1145.15	-4.10421	818.622	1158.52	314.361	723.819	1134.88	161.02	545.274	894.216	-83.6282	577.436	1140.07	58.0946	635.435	1134.56	9.1534	630.896	1210.27	48.923	658.413	1296.48	79.9496	761.267	798.979	426.838	497.105	823.688	468.705	498.044	846.574	397.352	412.24	852.841	434.294	305.251	822.731	425.844
231	2.3	688.107	1354.46	126.802	736.353	1341.44	65.9785	721.332	1346.99	197.062	794.37	1145.25	-4.05017	818.7	1158.46	314.359	723.836	1134.86	161.097	544.981	894.439	-83.8681	576.72	1140.31	58.0229	635.042	1134.7	9.28223	630.11	1210.48	48.8283	657.347	1297.05	79.1141	761.29	798.884	426.573	497.059	823.698	468.667	498.008	846.607	397.312	412.24	852.859	434.298	305.215	822.736	425.838
232	2.31	688.735	1354.43	126.957	736.47	1341.52	66.1655	721.762	1347.07	197.246	794.179	1145.31	-4.01268	818.833	1158.39	314.38	723.815	1134.87	161.232	544.867	894.527	-84.0536	576.01	1140.43	57.8524	634.618	1134.75	9.4101	629.305	1210.6	48.6126	656.181	1297.68	78.0766	761.292	798.759	426.291	497.061	823.655	468.634	497.957	846.608	397.275	412.244	852.855	434.3	305.218	822.724	425.828
233	2.32	689.089	1354.51	127.173	736.605	1341.59	66.3495	722.185	1347.13	197.481	794.007	1145.36	-3.99858	818.999	1158.3	314.441	723.72	1134.92	161.387	544.841	894.481	-84.1759	575.178	1140.48	57.6123	634.2	1134.7	9.54252	628.458	1210.68	48.3276	654.924	1298.3	76.79	761.302	798.623	426.013	497.121	823.612	468.634	497.94	846.59	397.273	412.261	852.838	434.313	305.234	822.703	425.86
234	2.33	689.311	1354.61	127.464	736.734	1341.63	66.5367	722.545	1347.18	197.714	793.816	1145.4	-3.98976	819.129	1158.2	314.453	723.512	1135.04	161.569	544.917	894.308	-84.2653	574.166	1140.49	57.2521	633.673	1134.56	9.67669	627.331	1210.75	48.0621	653.438	1298.85	75.469	761.329	798.474	425.768	497.174	823.593	468.619	497.988	846.583	397.287	412.279	852.842	434.326	305.253	822.712	425.897
235	2.34	689.598	1354.63	127.689	736.937	1341.66	66.6976	722.907	1347.22	197.901	793.637	1145.39	-4.00307	819.246	1158.11	314.458	723.479	1135.06	161.694	545.139	893.996	-84.3701	573.067	1140.45	56.7879	632.846	1134.3	9.87669	626.115	1210.73	47.7996	651.883	1299.34	74.3077	761.386	798.335	425.561	497.25	823.547	468.584	498.028	846.578	397.26	412.281	852.839	434.323	305.29	822.694	425.91
236	2.35	689.879	1354.69	127.897	737.185	1341.68	66.8423	723.262	1347.22	198.077	793.504	1145.38	-4.03407	819.405	1158.03	314.484	723.504	1135.03	161.803	545.54	893.545	-84.4921	571.812	1140.36	56.31	631.88	1133.96	10.4396	624.898	1210.63	47.5936	650.146	1299.72	73.1844	761.413	798.208	425.406	497.343	823.506	468.568	498.019	846.573	397.242	412.303	852.833	434.32	305.296	822.677	425.923
237	2.36	690.141	1354.76	128.151	737.428	1341.7	66.9999	723.661	1347.2	198.282	793.392	1145.38	-4.04734	819.552	1157.99	314.53	723.418	1135.04	161.962	546.104	892.969	-84.6515	570.285	1140.15	55.8612	630.964	1133.51	11.4439	623.397	1210.57	47.5354	648.292	1299.99	72.3884	761.44	798.116	425.287	497.389	823.481	468.565	498.029	846.566	397.236	412.321	852.836	434.334	305.329	822.672	425.94
238	2.37	690.438	1354.79	128.39	737.692	1341.67	67.2058	724.036	1347.2	198.509	793.269	1145.35	-4.0563	819.645	1157.95	314.599	723.267	1135.11	162.139	546.65	892.37	-84.8211	568.426	1139.91	55.3525	630.25	1133.16	12.0971	621.688	1210.44	47.5324	646.385	1300.09	71.9113	761.465	798.039	425.185	497.405	823.45	468.563	498.037	846.534	397.236	412.346	852.841	434.36	305.355	822.662	425.947
239	2.38	690.697	1354.79	128.623	738.019	1341.63	67.3956	724.427	1347.21	198.699	793.183	1145.32	-4.07811	819.723	1157.92	314.646	723.004	1135.25	162.324	547.269	891.68	-84.9925	566.386	1139.64	54.8181	629.424	1132.74	12.7294	619.842	1210.21	47.6334	644.485	1300.14	71.5105	761.468	797.995	425.13	497.358	823.432	468.557	498.02	846.531	397.229	412.346	852.852	434.368	305.339	822.671	425.951
240	2.39	690.601	1354.93	128.918	738.409	1341.59	67.5433	724.781	1347.21	198.83	793.165	1145.28	-4.07334	819.732	1157.9	314.701	722.848	1135.26	162.465	548.161	890.779	-85.1927	564.569	1139.18	54.2933	628.335	1132.21	13.4411	617.885	1209.9	47.8471	642.62	1300.15	71.2156	761.478	797.967	425.112	497.336	823.413	468.546	498.016	846.54	397.24	412.359	852.853	434.374	305.314	822.674	425.953
241	2.4	690.399	1355.09	129.201	738.76	1341.55	67.6712	725.119	1347.23	198.938	793.175	1145.24	-4.04799	819.732	1157.89	314.785	722.969	1135.26	162.645	549.219	889.817	-85.4056	562.709	1138.62	53.6889	627.279	1131.64	14.3177	615.792	1209.54	48.2313	640.874	1300.1	71.1342	761.467	797.96	425.139	497.322	823.413	468.559	498.026	846.54	397.258	412.35	852.857	434.379	305.304	822.684	425.969
242	2.41	691.285	1354.78	129.143	739.059	1341.55	67.8055	725.368	1347.24	199.067	793.181	1145.17	-4.04559	819.771	1157.92	314.871	722.97	1135.35	162.869	550.125	889.037	-85.5802	560.606	1138.12	53.1021	626.199	1131.02	15.2927	613.734	1209.07	48.8141	638.912	1299.94	71.3813	761.46	797.992	425.191	497.31	823.428	468.564	498.012	846.559	397.266	412.317	852.865	434.376	305.306	822.697	425.972
243	2.42	691.392	1354.9	129.314	739.343	1341.55	67.8825	725.684	1347.26	199.128	793.232	1145.12	-4.05092	819.789	1157.93	314.933	723.07	1135.41	163.011	550.917	888.5	-85.7694	558.212	1137.61	52.6105	624.985	1130.24	16.3392	611.601	1208.6	49.529	636.975	1299.64	71.8104	761.472	798.055	425.271	497.317	823.473	468.568	498.033	846.587	397.255	412.313	852.881	434.358	305.3	822.721	425.958
244	2.43	691.246	1355.17	129.511	739.655	1341.53	67.9359	726.011	1347.27	199.154	793.353	1145.08	-4.06	819.783	1157.95	314.978	723.335	1135.44	163.094	551.879	887.903	-86.0682	555.78	1136.91	51.9249	623.62	1129.27	17.6309	609.277	1208.01	50.2952	635.111	1299.23	72.4826	761.462	798.125	425.378	497.312	823.497	468.582	498.023	846.6	397.25	412.328	852.881	434.334	305.324	822.718	425.919
245	2.44	691.752	1355.09	129.465	739.935	1341.53	67.985	726.361	1347.32	199.207	793.493	1145.04	-4.0392	819.794	1157.99	315.022	723.589	1135.43	163.162	552.981	887.239	-86.6015	553.499	1136.2	51.2072	622.29	1128.34	19.0276	607.092	1207.37	51.0919	633.143	1298.8	73.7748	761.475	798.184	425.522	497.32	823.503	468.607	498.065	846.611	397.278	412.357	852.872	434.32	305.336	822.728	425.903
246	2.45	691.377	1355.44	129.722	740.162	1341.56	68.038	726.761	1347.39	199.281	793.681	1145	-3.99495	819.81	1158.02	315.091	723.853	1135.42	163.218	554.196	886.775	-87.3457	551.018	1135.43	50.6291	620.742	1127.27	20.6104	604.737	1206.65	52.1906	631.333	1298.18	75.527	761.472	798.252	425.695	497.327	823.503	468.632	498.077	846.592	397.293	412.348	852.872	434.34	305.346	822.724	425.91
247	2.46	691.51	1355.52	129.801	740.376	1341.56	68.0889	727.134	1347.44	199.317	793.878	1144.96	-3.96718	819.802	1158.02	315.144	723.967	1135.42	163.32	555.5	886.522	-88.2046	547.3	1135.27	49.9906	619.257	1126.28	22.3575	602.187	1205.8	53.4658	629.411	1297.36	77.8875	761.426	798.329	425.866	497.312	823.494	468.647	498.08	846.574	397.321	412.325	852.859	434.349	305.345	822.691	425.92
248	2.47	691.851	1355.54	129.834	740.637	1341.56	68.1158	727.53	1347.51	199.333	794.115	1144.92	-3.93257	819.795	1158.06	315.2	724.332	1135.35	163.378	556.561	886.023	-88.8689	542.847	1135.57	49.0727	617.783	1125.3	24.1775	599.584	1204.9	54.9053	627.815	1296.36	80.7227	761.362	798.404	426.059	497.266	823.484	468.674	498.025	846.539	397.346	412.309	852.837	434.35	305.34	822.66	425.934
249	2.48	692.242	1355.58	129.882	740.86	1341.57	68.1325	727.955	1347.6	199.396	794.362	1144.9	-3.88892	819.833	1158.09	315.275	724.699	1135.25	163.434	557.61	885.539	-89.5225	539.784	1134.88	47.9765	616.115	1124.29	26.0049	596.866	1203.97	56.5204	626.174	1295.14	84.1787	761.324	798.462	426.263	497.265	823.495	468.709	498.038	846.539	397.363	412.296	852.822	434.355	305.337	822.652	425.932
250	2.49	692.576	1355.67	129.939	741.098	1341.56	68.1725	728.317	1347.68	199.446	794.603	1144.88	-3.83634	819.877	1158.12	315.339	724.855	1135.27	163.493	558.954	885.168	-90.4931	536.922	1134.02	47.0483	614.317	1123.37	27.8431	593.907	1202.92	58.2728	624.279	1293.77	88.3274	761.267	798.495	426.463	497.278	823.498	468.726	498.092	846.557	397.376	412.314	852.812	434.357	305.337	822.659	425.931
251	2.5	692.973	1355.76	129.928	741.359	1341.56	68.2109	728.638	1347.78	199.46	794.801	1144.88	-3.76242	819.929	1158.14	315.413	724.954	1135.38	163.55	560.152	884.815	-91.6143	534.087	1133.01	45.9924	613.088	1122.73	29.4141	590.933	1201.8	60.0703	622.028	1292.1	93.1259	761.257	798.524	426.636	497.239	823.531	468.728	498.126	846.558	397.38	412.3	852.814	434.339	305.324	822.694	425.913
252	2.51	693.292	1355.89	129.95	741.642	1341.56	68.2376	728.91	1347.88	199.482	794.881	1144.9	-3.68215	819.97	1158.14	315.485	724.995	1135.51	163.598	561.087	884.358	-92.7079	531.491	1131.74	44.6658	610.813	1121.16	30.713	587.616	1200.47	62.0254	619.495	1290.08	98.4877	761.228	798.515	426.724	497.24	823.543	468.724	498.131	846.585	397.381	412.309	852.842	434.314	305.323	822.719	425.885
253	2.52	693.71	1355.98	130.005	741.932	1341.55	68.2896	729.215	1347.99	199.528	794.886	1144.93	-3.56247	820.085	1158.1	315.582	725.034	1135.61	163.642	562.239	883.793	-94.1654	528.839	1130.36	43.3568				584.153	1199.03	64.0609	616.584	1287.68	104.433	761.185	798.467	426.775	497.222	823.567	468.714	498.153	846.624	397.403	412.342	852.869	434.305	305.294	822.749	425.869
254	2.53	694.165	1356.01	130.093	742.225	1341.52	68.3871	729.557	1348.08	199.605	794.85	1145	-3.43589	820.26	1158.07	315.675				563.358	883.186	-95.7754	526.048	1128.77	42.2111				580.194	1197.37	66.3995	612.731	1285.04	110.827	761.197	798.424	426.78	497.216	823.582	468.702	498.144	846.632	397.419	412.349	852.891	434.336	305.308	822.752	425.874
255	2.54	694.516	1356.06	130.241	742.49	1341.5	68.4963	729.842	1348.14	199.725	794.794	1145.1	-3.32881	820.434	1158	315.763				564.374	882.721	-97.4279	523.174	1127.06	41.0571				576.259	1195.51	68.6645	607.962	1281.98	117.554	761.246	798.364	426.73	497.246	823.554	468.707	498.146	846.638	397.409	412.331	852.91	434.356	305.328	822.751	425.899
256	2.55	694.761	1356.18	130.507	742.809	1341.48	68.6103	730.168	1348.21	199.897	794.677	1145.18	-3.23932	820.656	1157.91	315.849				565.764	882.325	-99.3684	520.408	1125.08	39.9077				572.176	1193.43	70.8374	602.808	1278.21	125.04	761.255	798.234	426.616	497.294	823.52	468.741	498.149	846.606	397.412	412.314	852.904	434.36	305.337	822.755	425.911
257	2.56	694.998	1356.36	130.779	743.181	1341.46	68.7575	730.532	1348.28	200.068	794.543	1145.25	-3.15649	820.896	1157.83	315.965				567.06	881.691	-101.261	517.434	1122.9	38.9012				567.964	1191.1	72.827	596.382	1274	132.534	761.283	798.072	426.451	497.316	823.464	468.749	498.174	846.588	397.425	412.35	852.868	434.369	305.41	822.72	425.93
258	2.57	695.262	1356.51	131.03	743.575	1341.47	68.9689	730.929	1348.35	200.275	794.375	1145.34	-3.05696	821.105	1157.7	316.129				568.542	880.935	-103.437	514.25	1120.31	38.0054				563.536	1188.53	74.5948	588.482	1269.27	139.358	761.352	797.899	426.235	497.347	823.421	468.737	498.165	846.592	397.427	412.403	852.85	434.374	305.445	822.698	425.955
259	2.58	695.48	1356.66	131.272	743.988	1341.48	69.2488	731.367	1348.42	200.519	794.172	1145.46	-2.96311	821.258	1157.56	316.279				569.815	880.32	-105.64	510.84	1117.52	37.2887				557.756	1185.97	76.7565	579.733	1264.43	145.686	761.469	797.717	426.002	497.455	823.388	468.715	498.179	846.605	397.411	412.438	852.853	434.382	305.471	822.692	425.955
260	2.59	695.898	1356.75	131.533	744.412	1341.48	69.5762	731.782	1348.49	200.805	793.996	1145.59	-2.87344	821.436	1157.4	316.426	726.394	1135.73	164.583	571.506	879.802	-107.936	507.221	1114.54	36.6699				552.135	1183.1	78.2043	570.317	1259.11	151.571	761.518	797.529	425.77	497.496	823.362	468.683	498.222	846.59	397.413	412.449	852.871	434.382	305.519	822.689	425.956
261	2.6	696.486	1356.79	131.851	744.837	1341.47	69.9468	732.226	1348.55	201.152	793.779	1145.7	-2.8012	821.59	1157.29	316.596	726.422	1135.77	164.736	573.182	878.956	-110.251	503.615	1111.26	35.9725				546.825	1180.09	79.1282	559.982	1253.42	157.504	761.521	797.323	425.531	497.508	823.324	468.684	498.232	846.565	397.414	412.477	852.894	434.393	305.515	822.697	425.958
262	2.61	697.059	1356.8	132.218	745.144	1341.48	70.3526	732.68	1348.61	201.56	793.516	1145.82	-2.71957	821.732	1157.18	316.756	726.581	1135.75	164.856	574.874	878.102	-112.484	499.867	1107.84	35.2038				540.837	1177.15	80.2623	549.517	1248.14	162.589	761.523	797.095	425.329	497.51	823.292	468.677	498.226	846.552	397.406	412.493	852.927	434.428	305.511	822.714	425.989
263	2.62	697.474	1356.9	132.628	745.431	1341.53	70.7457	733.095	1348.69	201.976	793.202	1145.93	-2.64759	821.862	1157.07	316.914				576.449	877.484	-114.541	495.989	1104.35	34.3319				535.321	1173.84	80.7431	539.443	1242.88	166.201	761.46	796.871	425.159	497.539	823.263	468.657	498.252	846.544	397.402	412.484	852.956	434.455	305.504	822.719	426.007
264	2.63	697.791	1357.04	133.048	745.809	1341.63	71.0655	733.191	1348.92	202.59	792.951	1146.04	-2.58442	821.932	1156.93	317.033				578.496	876.616	-116.823	492.325	1100.92	33.067				529.37	1170.66	81.1525	529.571	1237.57	168.557	761.398	796.654	424.987	497.531	823.24	468.623	498.219	846.526	397.378	412.472	852.957	434.447	305.472	822.714	425.999
265	2.64	698.398	1356.99	133.401	746.156	1341.78	71.3839	733.143	1349.19	203.273	792.673	1146.12	-2.54836	821.981	1156.85	317.188				580.911	875.568	-119.115	488.837	1097.6	31.7606				523.492	1167.56	81.1506	519.894	1232.4	170.143	761.399	796.471	424.875	497.536	823.213	468.613	498.217	846.52	397.38	412.483	852.942	434.439	305.473	822.714	426.005
266	2.65	699.3	1356.78	133.732	746.45	1341.97	71.7453	734.036	1348.99	203.332	792.262	1146.18	-2.53938	822.012	1156.76	317.372				582.576	874.703	-120.717	485.467	1094.45	30.2754				517.823	1164.56	80.9027	510.262	1227.4	171.2	761.407	796.298	424.792	497.534	823.196	468.62	498.228	846.521	397.395	412.458	852.937	434.444	305.438	822.727	426.007
267	2.66	699.491	1357.12	134.304	746.701	1342.17	72.1656	734.547	1348.98	203.673	791.954	1146.31	-2.50058	822.001	1156.68	317.493				584.421	874.018	-122.075	482.212	1091.42	28.7095				512.318	1161.62	80.5948	500.538	1222.39	171.985	761.361	796.141	424.724	497.547	823.195	468.609	498.211	846.505	397.394	412.424	852.936	434.445	305.425	822.727	426.006
268	2.67	699.266	1357.71	134.941	746.985	1342.35	72.5964	734.999	1349	204.088	791.687	1146.44	-2.49756	821.888	1156.62	317.577				586.545	873.398	-123.171	479.227	1088.44	27.1213				507.401	1158.86	80.2304	490.467	1217.4	172.609	761.323	796.013	424.692	497.559	823.19	468.606	498.223	846.486	397.366	412.439	852.924	434.416	305.436	822.716	425.998
269	2.68	699.412	1357.97	135.473	747.266	1342.57	73.0287	735.511	1349.08	204.55	791.435	1146.55	-2.50708	821.797	1156.59	317.686				588.1	872.55	-124.136	476.449	1085.58	25.3813				502.667	1156.26	79.7296	481.309	1212.51	172.624	761.323	795.904	424.719	497.555	823.196	468.614	498.212	846.451	397.364	412.468	852.905	434.405	305.477	822.691	425.99
270	2.69	699.743	1358.09	135.966	747.444	1342.83	73.5044	735.967	1349.12	205.013	791.273	1146.65	-2.50565	821.629	1156.52	317.776				589.758	871.881	-125.048	474.024	1082.9	23.7049				498.101	1153.51	78.9481	472.761	1207.8	172.289	761.338	795.81	424.791	497.594	823.186	468.626	498.208	846.43	397.382	412.463	852.917	434.421	305.478	822.701	425.989
271	2.7	700.233	1358.13	136.378	747.571	1343.12	73.9496	736.061	1349.34	205.681	791.097	1146.76	-2.49306	821.364	1156.49	317.858				591.461	871.172	-125.609	471.852	1080.53	22.1776				493.97	1150.97	78.2713	464.607	1203.24	171.749	761.292	795.751	424.864	497.589	823.179	468.635	498.193	846.408	397.374	412.467	852.924	434.422	305.449	822.707	425.983
272	2.71	700.729	1358.17	136.709	747.716	1343.37	74.2886	735.722	1349.74	206.593	790.942	1146.85	-2.50126	821.198	1156.54	317.955	723.89	1136.74	167.067	592.729	870.558	-125.945	469.813	1078.38	20.6257				490.321	1148.69	77.5607	457.063	1198.93	171.08	761.239	795.715	424.959	497.514	823.15	468.627	498.173	846.398	397.352	412.446	852.926	434.401	305.413	822.706	425.967
273	2.72	700.979	1358.28	137.05	747.92	1343.53	74.5609	735.86	1349.83	207.04	790.874	1146.89	-2.51745	821.006	1156.54	317.993				593.843	869.946	-126.361	468.053	1076.41	19.1187				486.872	1146.4	77.1198	450.146	1194.92	170.301	761.222	795.714	425.089	497.462	823.158	468.636	498.119	846.381	397.364	412.389	852.92	434.389	305.376	822.69	425.95
274	2.73	701.115	1358.4	137.443	748.097	1343.64	74.7793	736.08	1349.83	207.319	790.861	1146.92	-2.51854	820.77	1156.53	318.006	723.951	1136.78	167.026	595.015	869.209	-126.769	466.586	1074.7	17.7183				483.818	1144.32	76.6845	443.917	1191.18	169.476	761.22	795.714	425.242	497.416	823.209	468.652	498.086	846.379	397.377	412.36	852.891	434.379	305.321	822.701	425.94
275	2.74	700.919	1358.57	137.86	748.198	1343.74	74.9441	736.328	1349.83	207.534	790.88	1146.92	-2.53533	820.573	1156.56	318.019	723.883	1136.85	167.011	596.037	868.578	-127.1	465.272	1073.1	16.3548				481.15	1142.31	76.391	438.029	1187.6	168.767	761.203	795.734	425.388	497.399	823.248	468.658	498.089	846.399	397.368	412.317	852.882	434.356	305.271	822.739	425.914
276	2.75	700.58	1358.77	138.246	748.262	1343.8	75.093	736.551	1349.79	207.714	790.966	1146.93	-2.58055	820.38	1156.6	318.04	723.941	1136.83	166.927	596.839	868.056	-127.448	464.066	1071.65	15.1753				478.214	1140.21	76.2979	432.277	1183.94	168.153	761.165	795.771	425.566	497.325	823.271	468.65	498.078	846.407	397.367	412.287	852.882	434.316	305.214	822.757	425.867
277	2.76	700.545	1358.87	138.514	748.295	1343.86	75.2105	736.706	1349.72	207.842	791.072	1146.93	-2.61908	820.232	1156.63	318.097	723.871	1136.92	166.945	597.508	867.509	-127.692	462.958	1070.22	13.9892				475.72	1138.17	76.1909	426.555	1180.16	167.7	761.156	795.802	425.746	497.292	823.292	468.668	498.08	846.402	397.373	412.271	852.864	434.294	305.188	822.751	425.842
278	2.77	700.745	1358.86	138.708	748.332	1343.89	75.2951	736.918	1349.68	207.96	791.211	1146.92	-2.63244	820.138	1156.65	318.107	723.991	1136.96	166.885	598.186	867.014	-127.782	461.958	1068.82	12.9666				473.021	1135.82	76.2769	421.577	1176.63	167.248	761.129	795.799	425.912	497.319	823.317	468.694	498.084	846.392	397.383	412.291	852.845	434.297	305.231	822.747	425.835
279	2.78	700.94	1358.76	138.847	748.393	1343.9	75.3789	737.071	1349.62	208.05	791.384	1146.93	-2.59857	820.087	1156.65	318.126	724.117	1136.98	166.811	598.914	866.587	-127.893	460.901	1067.42	12.1142				470.34	1133.63	76.5065	416.65	1173	166.788	761.116	795.802	426.098	497.287	823.3	468.695	498.039	846.367	397.387	412.29	852.85	434.299	305.261	822.72	425.84
280	2.79	701.063	1358.64	138.916	748.397	1343.89	75.4625	737.19	1349.58	208.115	791.533	1146.95	-2.55367	820.069	1156.63	318.141	724.142	1137.04	166.803	599.733	866.261	-128.174	459.721	1066	11.2066				467.506	1131.08	76.6363	411.6	1169.17	166.288	761.112	795.792	426.266	497.265	823.286	468.707	498.041	846.353	397.387	412.269	852.857	434.3	305.267	822.706	425.841
281	2.8	701.152	1358.53	138.999	748.456	1343.84	75.4988	737.362	1349.52	208.185	791.684	1146.97	-2.52252	820.138	1156.61	318.169	724.44	1137.02	166.734	600.77	866.09	-128.648	458.528	1064.41	10.3186				464.629	1128.33	76.7832	406.442	1165.11	165.681	761.114	795.797	426.374	497.301	823.286	468.699	498.093	846.352	397.399	412.293	852.848	434.279	305.293	822.692	425.834
282	2.81	701.195	1358.45	139.044	748.587	1343.76	75.5303	737.529	1349.46	208.231	791.759	1147	-2.49391	820.261	1156.6	318.205	724.813	1136.97	166.725	601.851	865.98	-129.204	457.373	1062.63	9.47632				461.541	1125.43	76.9004	400.923	1160.85	164.925	761.088	795.79	426.476	497.302	823.297	468.704	498.116	846.348	397.408	412.339	852.827	434.268	305.343	822.693	425.83
283	2.82	701.243	1358.37	139.063	748.671	1343.7	75.5447	737.639	1349.41	208.242	791.749	1147.05	-2.4479	820.397	1156.57	318.217	724.818	1137.05	166.812	602.674	865.801	-129.644	455.91	1060.64	8.60851				458.276	1122.46	76.9467	395.19	1156.26	163.956	761.084	795.824	426.551	497.311	823.303	468.709	498.127	846.347	397.39	412.351	852.84	434.277	305.328	822.711	425.832
284	2.83	701.328	1358.28	139.06	748.749	1343.61	75.5585	737.742	1349.39	208.242	791.637	1147.12	-2.39934	820.587	1156.54	318.207	724.969	1137.12	166.876	603.47	865.521	-130.205	454.298	1058.57	7.61729				454.845	1119.27	76.8638	389.31	1151.31	162.84	761.097	795.847	426.598	497.358	823.289	468.711	498.125	846.354	397.381	412.357	852.856	434.265	305.317	822.737	425.837
285	2.84	701.452	1358.17	139.052	748.873	1343.51	75.548	737.883	1349.34	208.254	791.467	1147.22	-2.34838	820.835	1156.51	318.237	725.251	1137.1	166.95	604.582	865.114	-131.011	452.684	1056.29	6.53777				451.117	1115.89	76.6001	383.401	1146.04	161.544	761.121	795.871	426.61	497.42	823.289	468.713	498.161	846.37	397.392	412.392	852.857	434.256	305.337	822.754	425.839
286	2.85	701.684	1358.03	139.03	749.042	1343.4	75.5554	738.031	1349.3	208.283	791.204	1147.33	-2.27511	821.151	1156.49	318.335	725.754	1136.98	167.056	605.83	864.65	-131.98	450.812	1053.77	5.29973				447.482	1112.33	76.2283	377.277	1140.27	160.106	761.161	795.874	426.607	497.488	823.283	468.718	498.24	846.4	397.422	412.432	852.871	434.273	305.391	822.759	425.844
287	2.86	701.809	1357.94	139.066	749.166	1343.28	75.6084	738.141	1349.29	208.341	790.848	1147.45	-2.21284	821.429	1156.48	318.404	726.366	1136.84	167.131	607.015	864.208	-133.061	448.913	1051.06	3.91893				443.619	1108.51	75.6854	371.069	1133.98	158.459	761.212	795.868	426.598	497.506	823.266	468.747	498.251	846.411	397.434	412.45	852.877	434.302	305.427	822.77	425.872
288	2.87	701.961	1357.85	139.119	749.276	1343.18	75.6653	738.244	1349.29	208.385	790.438	1147.57	-2.19851	821.645	1156.42	318.455	726.575	1136.83	167.305	608.203	863.789	-134.14	446.907	1048.14	2.39037				439.24	1103.97	75.0174	365.021	1127.19	156.622	761.296	795.872	426.555	497.506	823.268	468.757	498.228	846.391	397.425	412.451	852.884	434.314	305.425	822.786	425.897
289	2.88	702.145	1357.79	139.161	749.444	1343.1	75.742	738.429	1349.29	208.447	789.963	1147.67	-2.17928	821.9	1156.38	318.529	726.775	1136.72	167.433	609.813	863.418	-135.619	445.291	1045.17	0.82349				435.726	1099.86	73.9418	359.195	1119.92	154.527	761.366	795.844	426.471	497.51	823.243	468.757	498.267	846.402	397.441	412.502	852.884	434.315	305.482	822.769	425.917
290	2.89	702.333	1357.79	139.242	749.593	1343.04	75.8508	738.586	1349.33	208.545	789.439	1147.78	-2.15415	822.173	1156.29	318.568	727.149	1136.66	167.544	611.207	862.978	-137.172	444.375	1042.1	-0.59704				432.332	1095.78	72.7431	353.67	1112.37	152.23	761.379	795.785	426.381	497.518	823.211	468.748	498.305	846.391	397.462	412.578	852.889	434.348	305.538	822.767	425.942
291	2.9	702.311	1357.9	139.412	749.69	1343.01	76.0189	738.757	1349.35	208.669	788.834	1147.88	-2.13234	822.506	1156.18	318.595	727.245	1136.65	167.671	612.723	862.431	-138.992	442.86	1038.71	-2.24998				428.759	1091.03	71.5588	348.594	1104.78	149.773	761.37	795.704	426.303	497.559	823.169	468.737	498.355	846.401	397.473	412.606	852.899	434.385	305.588	822.76	425.987
292	2.91	702.455	1357.99	139.564	749.835	1342.99	76.1803	738.959	1349.4	208.809	788.18	1148	-2.17013	822.736	1156.1	318.621	727.192	1136.65	167.815	614.215	861.822	-140.782	441.411	1035.07	-4.01466				425.922	1086.22	70.491	343.976	1097.28	147.152	761.414	795.652	426.191	497.606	823.164	468.731	498.36	846.414	397.451	412.64	852.905	434.377	305.637	822.756	425.989
293	2.92	702.798	1358.01	139.75	749.975	1342.98	76.3548	739.191	1349.45	209.002	787.463	1148.12	-2.20843	822.951	1156.03	318.658	727.197	1136.66	167.919	616.025	861.15	-142.596	440.187	1031.25	-5.97634				422.897	1081.61	68.6328	340.006	1090.23	144.416	761.429	795.599	426.08	497.652	823.152	468.73	498.403	846.431	397.454	412.66	852.907	434.367	305.661	822.754	425.996
294	2.93	703.386	1357.95	139.961	750.05	1343.01	76.5611	739.516	1349.5	209.267	786.664	1148.27	-2.19915	823.069	1155.95	318.701	727.297	1136.58	168.03	618.035	860.551	-144.333	439.151	1027.5	-7.94591				420.424	1077.26	66.5912	336.599	1083.76	141.593	761.44	795.556	426.026	497.695	823.126	468.743	498.441	846.427	397.469	412.673	852.905	434.379	305.699	822.741	426.016
295	2.94	703.883	1357.97	140.203	750.048	1343.06	76.8184	739.83	1349.54	209.547	785.88	1148.46	-2.22067	823.071	1155.93	318.73	727.304	1136.5	168.142	620.091	860.013	-146.356	438.49	1023.89	-9.97498				418.508	1073.06	64.4236	333.821	1077.89	138.661	761.419	795.529	425.983	497.667	823.13	468.747	498.44	846.419	397.482	412.669	852.908	434.394	305.7	822.75	426.012
296	2.95	704.005	1358.08	140.49	749.971	1343.15	77.1114	740.07	1349.6	209.795	785.202	1148.64	-2.30125	822.995	1155.94	318.756	727.15	1136.5	168.179	622.036	859.207	-148.445	438.16	1020.49	-11.9992				416.922	1069	62.3269	331.563	1072.44	135.765	761.426	795.525	425.945	497.636	823.132	468.748	498.399	846.413	397.466	412.648	852.938	434.383	305.66	822.774	425.996
297	2.96	704.113	1358.21	140.79	749.906	1343.26	77.4006	740.31	1349.66	210.04	784.552	1148.81	-2.39752	822.863	1155.99	318.791	726.951	1136.52	168.214	624.028	858.349	-150.406	438.173	1017.25	-13.9796				415.75	1065.19	60.2832	329.77	1067.33	132.976	761.437	795.523	425.952	497.629	823.138	468.743	498.37	846.406	397.458	412.641	852.959	434.387	305.63	822.805	426.007
298	2.97	704.449	1358.24	140.983	749.897	1343.37	77.624	740.403	1349.77	210.375	783.977	1148.95	-2.52245	822.691	1156.05	318.792	726.842	1136.5	168.207	626.135	857.63	-152.054	438.257	1014.15	-15.9603				414.889	1061.57	58.2392	328.251	1062.53	130.284	761.411	795.504	426.005	497.627	823.148	468.739	498.357	846.388	397.455	412.637	852.953	434.383	305.624	822.794	426.005
299	2.98	705.068	1358.1	141.11	749.822	1343.52	77.8347	740.294	1350	210.786	783.492	1149.06	-2.68846	822.378	1156.06	318.805	726.661	1136.49	168.174	628.538	856.855	-153.684	438.561	1011.19	-17.881				414.256	1058.17	56.2454	326.962	1058.04	127.6	761.37	795.485	426.077	497.6	823.163	468.735	498.329	846.385	397.443	412.601	852.943	434.359	305.574	822.784	425.988
300	2.99	705.39	1358.19	141.38	749.69	1343.68	78.0394	740.538	1349.98	210.916	783.081	1149.13	-2.85336	822.064	1156.14	318.828	726.376	1136.56	168.154	630.642	855.899	-155.16	439.117	1008.36	-19.8429				413.814	1055.12	54.3788	325.858	1053.91	124.978	761.309	795.459	426.17	497.555	823.185	468.731	498.292	846.375	397.423	412.564	852.936	434.349	305.55	822.758	425.961
301	3	705.562	1358.29	141.667	749.539	1343.84	78.2479	740.845	1349.88	210.964	782.756	1149.16	-3.00068	821.82	1156.22	318.859	726.248	1136.58	168.091	632.895	854.84	-156.472	439.825	1005.72	-21.6294				413.609	1052.17	52.5367	324.911	1050.08	122.349	761.291	795.478	426.288	497.526	823.204	468.722	498.301	846.369	397.425	412.543	852.916	434.335	305.533	822.729	425.933
302	3.01	705.652	1358.44	141.918	749.43	1343.97	78.4046	740.885	1349.93	211.16	782.513	1149.16	-3.16346	821.571	1156.22	318.834	726.308	1136.52	167.991	635.157	854.019	-157.46	440.435	1003.25	-23.4854				413.646	1049.37	50.7843	323.902	1046.6	119.547	761.275	795.495	426.408	497.483	823.201	468.724	498.283	846.343	397.428	412.535	852.885	434.329	305.545	822.704	425.919
303	3.02	705.652	1358.51	142.093	749.316	1344.07	78.4849	741.042	1349.83	211.173	782.411	1149.14	-3.3648	821.311	1156.27	318.821	726.264	1136.5	167.894	637.772	853.32	-158.433	441.014	1000.77	-25.2489				413.366	1046.6	48.8479	322.819	1043.43	116.538	761.217	795.499	426.54	497.457	823.196	468.725	498.258	846.314	397.415	412.528	852.847	434.301	305.559	822.662	425.904
304	3.03	705.468	1358.59	142.236	749.154	1344.18	78.5363	740.827	1349.98	211.367	782.332	1149.13	-3.56194	821.023	1156.33	318.748	726.041	1136.55	167.808	640.092	852.335	-159.147	441.678	998.419	-26.9961				412.931	1043.46	46.7989	321.734	1040.45	113.404	761.183	795.525	426.65	497.401	823.2	468.715	498.214	846.297	397.4	412.486	852.833	434.288	305.492	822.654	425.875
305	3.04	705.216	1358.7	142.372	748.97	1344.27	78.5969	740.868	1349.9	211.34	782.287	1149.12	-3.76506	820.737	1156.38	318.686	725.753	1136.66	167.714	642.323	851.241	-159.654	442.237	995.958	-28.7588				412.58	1040.68	44.6861	320.476	1037.61	110.143	761.12	795.581	426.75	497.354	823.249	468.723	498.139	846.278	397.398	412.433	852.87	434.29	305.424	822.675	425.863
306	3.05	705.227	1358.65	142.392	748.888	1344.32	78.5751	741.089	1349.68	211.155	782.331	1149.1	-3.99385	820.506	1156.43	318.624	725.51	1136.75	167.594	644.595	850.053	-160.091	442.707	993.448	-30.5271				411.953	1037.78	42.6415	318.977	1034.78	106.895	761.053	795.641	426.835	497.299	823.304	468.73	498.102	846.297	397.405	412.391	852.903	434.278	305.376	822.711	425.853
307	3.06	705.268	1358.55	142.318	748.825	1344.32	78.5043	741.148	1349.6	211.072	782.395	1149.07	-4.25865	820.31	1156.48	318.532	725.248	1136.89	167.475	646.737	848.979	-160.302	442.944	990.821	-32.2747				411.057	1034.85	40.5448	317.252	1031.85	103.596	760.981	795.676	426.897	497.249	823.38	468.717	498.075	846.328	397.394	412.341	852.93	434.245	305.29	822.768	425.833
308	3.07	705.153	1358.47	142.236	748.796	1344.29	78.3936	741.089	1349.54	210.975	782.484	1149.02	-4.51882	820.164	1156.52	318.466	724.814	1137.06	167.375	648.879	847.843	-160.509	443.021	988.104	-33.9926				410.158	1031.69	38.3232	315.516	1028.65	100.175	760.951	795.724	426.934	497.192	823.431	468.69	498.047	846.359	397.36	412.312	852.939	434.215	305.232	822.799	425.81
309	3.08	705.188	1358.29	142.088	748.806	1344.24	78.2638	741.052	1349.48	210.849	782.658	1148.95	-4.78635	820.077	1156.56	318.377	724.483	1137.16	167.271	651.149	846.697	-160.605	443.128	985.194	-35.7276	492.632	983.319	23.9388	409.147	1028.49	36.3004	313.46	1025.04	96.8929	760.944	795.763	426.929	497.147	823.463	468.679	498.028	846.342	397.327	412.297	852.952	434.192	305.228	822.798	425.799
310	3.09	705.325	1358.09	141.902	748.834	1344.18	78.1365	741.02	1349.37	210.747	782.847	1148.85	-5.01072	820.041	1156.59	318.324	724.488	1137.17	167.172	653.405	845.483	-160.438	443.107	982.101	-37.4109	491.777	980.664	22.8072	407.722	1024.95	34.286	311.295	1020.86	93.6304	761.006	795.796	426.908	497.153	823.477	468.673	498.068	846.344	397.323	412.317	852.943	434.194	305.24	822.776	425.8
311	3.1	704.736	1358.14	141.833	748.855	1344.09	77.9517	740.988	1349.24	210.602	783.017	1148.69	-5.24711	819.939	1156.56	318.24	724.333	1137.17	167.044	655.379	844.108	-160.217	442.857	978.86	-38.9376	490.287	977.63	22.1267	406.259	1021.2	32.318	309.081	1016.24	90.3508	760.999	795.774	426.861	497.164	823.459	468.65	498.095	846.339	397.319	412.332	852.905	434.193	305.297	822.728	425.812
312	3.11	703.545	1358.42	141.886	748.919	1343.98	77.7164	740.924	1349.11	210.412	783.207	1148.48	-5.5141	819.883	1156.55	318.118	724.186	1137.21	166.909	656.999	842.75	-159.937	442.401	975.472	-40.3812	489.021	974.691	21.051	404.624	1017.37	30.3735	306.832	1011.23	87.0084	760.998	795.733	426.795	497.175	823.435	468.624	498.07	846.305	397.29	412.325	852.865	434.18	305.303	822.699	425.807
313	3.12	703.646	1358.27	141.52	749.059	1343.88	77.4561	740.84	1349.01	210.198	783.407	1148.22	-5.8086	819.951	1156.57	317.999	724.233	1137.2	166.747	658.735	841.498	-159.519	442.041	971.923	-41.6654	488.117	971.678	19.9607	403.007	1013.47	28.7947	304.813	1005.93	83.4816	761.049	795.724	426.706	497.238	823.386	468.593	498.075	846.293	397.247	412.377	852.837	434.154	305.32	822.687	425.799
314	3.13	703.845	1358.11	141.205	749.201	1343.81	77.2017	740.797	1348.93	209.978	783.519	1147.94	-6.09763	819.949	1156.6	317.928	724.401	1137.14	166.581	660.515	840.491	-159.096	441.616	968.589	-42.9388	486.888	968.589	19.3804	401.498	1009.51	27.4606	302.882	1000.54	80.584	761.127	795.762	426.634	497.318	823.353	468.582	498.089	846.297	397.232	412.412	852.826	434.143	305.371	822.678	425.805
315	3.14	703.903	1358.04	140.93	749.259	1343.75	76.9273	740.699	1348.87	209.701	783.58	1147.64	-6.42026	819.86	1156.62	317.812	724.814	1136.95	166.24	662.832	839.396	-158.972	441.328	965.468	-43.9441	485.786	965.496	18.7549	400.252	1005.4	26.2935	301.262	995.087	78.1309	761.164	795.82	426.549	497.339	823.351	468.563	498.093	846.286	397.217	412.418	852.837	434.142	305.404	822.668	425.815
316	3.15	703.909	1358.01	140.642	749.366	1343.69	76.5986	740.588	1348.85	209.368	783.528	1147.33	-6.75011	819.791	1156.71	317.7	725.168	1136.82	165.861	665.218	838.463	-159.245	440.898	961.968	-44.7336	485.23	962.5	18.0437	399.078	1001.38	25.0841	299.967	989.631	76.2041	761.232	795.948	426.445	497.367	823.389	468.546	498.104	846.3	397.19	412.443	852.853	434.116	305.417	822.696	425.807
317	3.16	703.982	1358.02	140.34	749.523	1343.66	76.2617	740.561	1348.86	209.032	783.418	1147.05	-7.07237	819.685	1156.89	317.638	725.628	1136.58	165.471	666.626	837.476	-159.273	440.49	958.649	-45.4258	484.471	959.602	17.7097	398.085	997.661	24.34	298.942	984.44	74.9399	761.323	796.122	426.35	497.357	823.417	468.518	498.166	846.348	397.166	412.468	852.888	434.09	305.422	822.737	425.803
318	3.17	703.843	1358.14	140.089	749.609	1343.66	75.9632	740.482	1348.91	208.706	783.255	1146.78	-7.36009	819.546	1157.04	317.516	726.115	1136.31	165.025	667.831	836.428	-159.278	440.197	955.431	-45.8479	483.972	956.8	17.4279	397.333	994.125	23.9621	298.158	979.511	74.3743	761.381	796.297	426.284	497.317	823.453	468.486	498.17	846.372	397.149	412.433	852.918	434.081	305.394	822.775	425.801
319	3.18	703.588	1358.31	139.845	749.63	1343.66	75.6689	740.444	1348.99	208.379	783.047	1146.53	-7.63735	819.378	1157.19	317.39	726.346	1136.12	164.695	668.815	835.531	-159.179	440.002	952.194	-46.0361	483.716	954.333	17.2097	396.648	990.786	23.6374	297.738	974.965	74.3709	761.42	796.468	426.253	497.286	823.492	468.472	498.165	846.386	397.153	412.406	852.925	434.082	305.374	822.791	425.802
320	3.19	703.388	1358.51	139.616	749.604	1343.67	75.3974	740.502	1349.07	208.043	782.848	1146.33	-7.88522	819.132	1157.34	317.259	726.266	1136.09	164.567	669.782	834.662	-158.883	439.811	949.268	-46.0313	483.51	952.048	17.191	396.082	987.619	23.3677	297.654	970.864	74.7372	761.419	796.634	426.261	497.237	823.514	468.472	498.149	846.39	397.142	412.409	852.915	434.069	305.342	822.795	425.794
321	3.2	703.342	1358.65	139.358	749.518	1343.69	75.1623	740.68	1349.16	207.749	782.666	1146.13	-8.1181	818.853	1157.48	317.119				670.574	833.855	-158.464	439.727	946.569	-45.8261	483.483	950.162	17.283	395.699	984.717	23.4058	297.673	967.254	75.3684	761.408	796.826	426.308	497.205	823.536	468.465	498.099	846.379	397.122	412.412	852.869	434.043	305.347	822.774	425.77
322	3.21	703.311	1358.77	139.108	749.439	1343.7	74.9542	740.861	1349.26	207.498	782.403	1145.89	-8.32752	818.654	1157.66	316.974				671.157	833.084	-158.014	439.619	944.076	-45.4535	482.629	948.426	18.5112	391.084	983.706	25.1292	297.721	964.191	76.05	761.368	796.989	426.412	497.186	823.558	468.472	498.08	846.356	397.129	412.404	852.821	434.035	305.375	822.72	425.762
323	3.22	703.233	1358.94	138.875	749.335	1343.73	74.7242	740.951	1349.37	207.212	782.064	1145.63	-8.54565	818.422	1157.84	316.855	725.848	1135.97	164.111	671.587	832.255	-157.502	439.617	941.982	-44.9711	480.22	947.16	21.3803	381.235	985.004	28.8937	297.781	961.692	76.8101	761.254	797.124	426.565	497.158	823.577	468.493	498.026	846.338	397.134	412.393	852.798	434.045	305.362	822.695	425.76
324	3.23	703.17	1359.08	138.624	749.269	1343.73	74.4822	741.064	1349.5	206.878	781.771	1145.39	-8.74207	818.028	1157.94	316.742				671.749	831.357	-157.022	439.734	940.238	-44.419	479.522	945.714	22.5601	379.323	984.484	29.746	298.53	959.395	77.7685	761.154	797.273	426.698	497.103	823.609	468.491	498.001	846.344	397.132	412.372	852.79	434.038	305.338	822.697	425.761
325	3.24	703.306	1359.15	138.278	749.213	1343.71	74.2379	741.197	1349.66	206.578	781.436	1145.16	-8.89033	817.761	1158.06	316.628				671.767	830.514	-156.508	439.699	938.784	-43.8313	480.381	943.959	22.1786				299.029	957.443	78.578	761.125	797.454	426.864	497.059	823.642	468.488	498.012	846.354	397.126	412.338	852.801	434.042	305.31	822.687	425.759
326	3.25	703.625	1359.14	137.895	749.105	1343.68	73.9653	741.27	1349.81	206.318	781.049	1144.96	-9.01743	817.557	1158.21	316.498				671.775	829.694	-155.914	439.492	937.516	-43.2681	482.23	942.194	20.565	394.402	974.955	25.8273	297.108	956.828	78.31	761.106	797.647	427.009	497.034	823.658	468.531	498.017	846.37	397.146	412.307	852.816	434.064	305.279	822.701	425.761
327	3.26	703.784	1359.12	137.547	748.946	1343.64	73.6798	741.273	1349.93	206.05	780.576	1144.77	-9.11503	817.337	1158.37	316.35				671.704	828.828	-155.407	439.157	936.495	-42.8366	482.075	940.669	20.7934	393.761	974.528	26.0042	295.682	956.217	77.8847	761.09	797.851	427.131	496.985	823.715	468.549	497.967	846.375	397.161	412.306	852.835	434.066	305.236	822.729	425.746
328	3.27	703.812	1359.12	137.262	748.788	1343.57	73.3743	741.221	1350.05	205.784	780.157	1144.44	-9.08399	817.232	1158.47	316.213				671.658	828.056	-154.834	438.651	935.609	-42.5113	481.394	939.034	21.2633	393.33	973.388	25.8048	294.153	955.706	77.0876	761.104	798.033	427.204	496.948	823.758	468.551	497.922	846.386	397.151	412.28	852.841	434.065	305.198	822.753	425.733
[truncated: 425 more rows]
[truncated: 3 more columns]

## Sheet: Trial02
PathFileType	4	(X/Y/Z)	Trial02.trc
[truncated: 855 more rows]

[truncated: 4 more sheets: Trial03, Trial04, Trial05, Trial06]
