# Supplementary material for: Upper-Limb Kinematic Variables are correlated with Fugl-Meyer Assessment Sub Scales During a Hand-to-Mouth Functional Task in Post-Stroke Individuals
Source: Research Square preprint supplement (doi:10.21203/rs.3.rs-8270137/v1), 2025-12-16
Supplement: Supplementary file 34 [file Additional file 7.xls]

## Sheet: Static
PathFileType	4	(X/Y/Z)	Static.trc
DataRate	CameraRate	NumFrames	NumMarkers	Units	OrigDataRate	OrigDataStartFrame	OrigNumFrames
100	100	708	17	mm	100	1	708
Frame#	Time	nasion			r zyg pr			l zyg pr			r should			l should			sternum			r elbow			r ulna			r radius			r hand			r finger			l elbow			l ulna			l radius			l hand			l finger
		X1	Y1	Z1	X2	Y2	Z2	X3	Y3	Z3	X4	Y4	Z4	X5	Y5	Z5	X6	Y6	Z6	X7	Y7	Z7	X8	Y8	Z8	X9	Y9	Z9	X10	Y10	Z10	X11	Y11	Z11	X12	Y12	Z12	X13	Y13	Z13	X14	Y14	Z14	X15	Y15	Z15	X16	Y16	Z16
1	0	528.784	1291.91	212.761	561.171	1285.35	146.101	563.169	1285.41	281.431	664.909	1111.75	62.9995	689.812	1113.34	361.46	593.153	1062.08	215.021	704.862	774.749	-91.0564	439.204	844.184	-114.554	443.892	848.656	-36.7744	358.915	865.367	-69.4646	263.597	834.296	-68.308	696.7	770.86	505.94	427.762	846.083	479.656	450.576	845.287	401.064	372.229	873.644	432.731	265.944	829.261	431.359
2	0.01	528.82	1291.91	212.788	561.136	1285.34	146.125	563.116	1285.43	281.451	664.899	1111.76	62.9922	689.759	1113.35	361.492	593.147	1062.07	215.004	704.788	774.736	-91.0748	439.211	844.099	-114.492	443.889	848.651	-36.7968	358.774	865.21	-69.4793	263.609	834.246	-68.3416	696.638	770.848	505.934	427.731	846.08	479.652	450.482	845.315	401.049	372.116	873.638	432.735	266.068	829.184	431.38
3	0.02	528.864	1291.87	212.79	561.096	1285.34	146.157	563.096	1285.44	281.469	664.896	1111.76	62.997	689.737	1113.35	361.512	593.165	1062.05	214.993	704.784	774.735	-91.0714	439.289	843.964	-114.335	443.861	848.631	-36.7761	358.488	864.934	-69.4372	263.644	834.192	-68.3349	696.636	770.841	505.952	427.729	846.08	479.652	450.426	845.334	401.037	372.042	873.632	432.739	266.084	829.131	431.378
4	0.03	528.868	1291.85	212.831	561.098	1285.33	146.214	563.149	1285.42	281.51	664.91	1111.76	63.0227	689.773	1113.35	361.516	593.166	1062.05	215.023	704.831	774.747	-91.0758	439.317	843.938	-114.292	443.879	848.621	-36.7418	358.414	864.867	-69.3897	263.635	834.202	-68.2716	696.664	770.842	505.967	427.721	846.071	479.664	450.441	845.333	401.064	372.062	873.624	432.74	266.115	829.099	431.381
5	0.04	528.906	1291.84	212.856	561.13	1285.33	146.227	563.18	1285.41	281.525	664.943	1111.76	63.0441	689.776	1113.35	361.546	593.166	1062.03	215.043	704.879	774.765	-91.0635	439.316	843.925	-114.285	443.893	848.615	-36.7246	358.399	864.846	-69.3601	263.613	834.181	-68.2389	696.67	770.829	505.974	427.727	846.061	479.674	450.455	845.322	401.081	372.093	873.607	432.751	266.099	829.098	431.415
6	0.05	528.957	1291.84	212.835	561.132	1285.32	146.191	563.251	1285.38	281.517	664.914	1111.74	63.0356	689.792	1113.32	361.537	593.174	1062.03	215.033	704.82	774.713	-91.0644	439.3	843.912	-114.283	443.905	848.602	-36.7579	358.414	864.822	-69.3922	263.58	834.176	-68.2744	696.654	770.813	505.978	427.737	846.035	479.668	450.483	845.272	401.077	372.078	873.574	432.749	266.035	829.096	431.437
7	0.06	529.016	1291.83	212.799	561.142	1285.35	146.177	563.307	1285.38	281.489	664.913	1111.71	63.0309	689.821	1113.31	361.508	593.219	1062.01	215	704.76	774.645	-91.0815	439.315	843.914	-114.311	443.907	848.607	-36.7878	358.436	864.794	-69.4272	263.624	834.198	-68.3347	696.674	770.798	505.964	427.771	846.02	479.652	450.528	845.24	401.07	372.109	873.579	432.738	266.086	829.112	431.415
8	0.07	528.967	1291.87	212.794	561.198	1285.37	146.158	563.308	1285.42	281.484	664.938	1111.69	63.0275	689.844	1113.31	361.509	593.257	1061.99	215.007	704.804	774.626	-91.0779	439.336	843.929	-114.309	443.921	848.631	-36.7783	358.463	864.804	-69.4327	263.638	834.206	-68.3414	696.721	770.802	505.96	427.792	846.029	479.66	450.597	845.223	401.097	372.152	873.573	432.731	266.078	829.143	431.426
9	0.08	528.878	1291.98	212.836	561.158	1285.4	146.181	563.279	1285.48	281.511	664.941	1111.7	63.0413	689.819	1113.32	361.533	593.184	1062.03	215.041	704.815	774.62	-91.0751	439.323	843.95	-114.282	443.923	848.66	-36.7519	358.431	864.858	-69.395	263.632	834.223	-68.3439	696.732	770.794	505.964	427.802	846.037	479.676	450.641	845.235	401.146	372.195	873.58	432.728	266.093	829.177	431.439
10	0.09	528.795	1292.04	212.819	561.099	1285.43	146.176	563.187	1285.54	281.52	664.905	1111.7	63.0418	689.745	1113.34	361.545	593.076	1062.1	215.066	704.792	774.613	-91.0624	439.287	843.965	-114.277	443.894	848.691	-36.7364	358.363	864.898	-69.3757	263.618	834.219	-68.3411	696.687	770.79	505.963	427.789	846.056	479.672	450.612	845.268	401.171	372.194	873.585	432.725	266.095	829.177	431.416
11	0.1	528.82	1292.04	212.789	561.041	1285.45	146.189	563.128	1285.57	281.501	664.871	1111.71	63.0153	689.728	1113.35	361.531	593.066	1062.09	215.039	704.772	774.615	-91.0491	439.299	843.956	-114.294	443.884	848.694	-36.7451	358.344	864.894	-69.384	263.595	834.202	-68.3644	696.678	770.794	505.952	427.768	846.055	479.643	450.571	845.296	401.129	372.157	873.589	432.722	266.033	829.189	431.411
12	0.11	528.809	1292.03	212.805	561.119	1285.44	146.178	563.098	1285.59	281.476	664.863	1111.73	63.0133	689.713	1113.35	361.535	593.111	1062.05	215.031	704.799	774.661	-91.0459	439.332	843.952	-114.281	443.926	848.675	-36.757	358.383	864.877	-69.3818	263.57	834.198	-68.3451	696.669	770.819	505.961	427.743	846.072	479.631	450.548	845.321	401.098	372.107	873.602	432.722	265.969	829.191	431.451
13	0.12	528.892	1292	212.811	561.111	1285.42	146.184	563.122	1285.58	281.479	664.842	1111.74	63.027	689.694	1113.34	361.532	593.139	1062	215.047	704.768	774.683	-91.0472	439.327	843.932	-114.27	443.914	848.646	-36.7294	358.396	864.855	-69.3635	263.548	834.211	-68.2857	696.662	770.839	505.975	427.738	846.07	479.661	450.499	845.319	401.095	372.078	873.613	432.735	265.998	829.177	431.46
14	0.13	528.947	1291.95	212.783	561.068	1285.4	146.17	563.128	1285.55	281.451	664.806	1111.72	63.0301	689.673	1113.33	361.532	593.163	1061.93	215.031	704.713	774.664	-91.0506	439.312	843.918	-114.293	443.885	848.62	-36.7399	358.403	864.83	-69.3878	263.577	834.226	-68.2851	696.632	770.839	505.989	427.737	846.075	479.659	450.445	845.287	401.067	372.072	873.618	432.744	266.081	829.196	431.46
15	0.14	528.939	1291.9	212.737	561.172	1285.36	146.089	563.134	1285.52	281.386	664.798	1111.71	63.0022	689.684	1113.31	361.514	593.224	1061.85	214.978	704.724	774.658	-91.0591	439.317	843.912	-114.313	443.927	848.588	-36.8111	358.447	864.799	-69.4564	263.642	834.201	-68.3499	696.622	770.843	505.992	427.721	846.065	479.625	450.451	845.253	401.026	372.058	873.622	432.732	266.036	829.202	431.47
16	0.15	528.946	1291.88	212.703	561.235	1285.35	146.045	563.128	1285.51	281.376	664.826	1111.7	63.0026	689.728	1113.31	361.508	593.229	1061.83	214.972	704.785	774.668	-91.0543	439.354	843.893	-114.308	443.958	848.58	-36.8146	358.461	864.785	-69.4612	263.65	834.176	-68.3557	696.642	770.834	505.998	427.714	846.055	479.628	450.485	845.222	401.014	372.08	873.61	432.722	265.999	829.152	431.433
17	0.16	528.909	1291.91	212.729	561.189	1285.37	146.096	563.141	1285.53	281.433	664.864	1111.71	63.026	689.733	1113.32	361.537	593.249	1061.86	215.003	704.817	774.686	-91.0415	439.304	843.911	-114.288	443.929	848.61	-36.7589	358.414	864.814	-69.395	263.633	834.182	-68.3369	696.629	770.829	506.011	427.734	846.045	479.654	450.522	845.238	401.08	372.091	873.601	432.74	266.014	829.153	431.442
18	0.17	528.802	1291.97	212.753	561.125	1285.41	146.134	563.1	1285.55	281.462	664.874	1111.71	63.0335	689.71	1113.32	361.552	593.214	1061.92	215.036	704.798	774.656	-91.057	439.269	843.95	-114.28	443.872	848.649	-36.731	358.362	864.86	-69.352	263.576	834.197	-68.3081	696.633	770.816	506.018	427.759	846.052	479.668	450.56	845.284	401.128	372.103	873.58	432.74	266.034	829.142	431.442
19	0.18	528.81	1291.97	212.706	561.157	1285.4	146.099	563.099	1285.55	281.429	664.899	1111.71	63.0155	689.721	1113.32	361.523	593.172	1061.97	215.015	704.784	774.643	-91.0631	439.296	843.948	-114.291	443.865	848.685	-36.7437	358.378	864.869	-69.3616	263.605	834.178	-68.3391	696.644	770.803	506.025	427.747	846.054	479.665	450.635	845.302	401.153	372.105	873.558	432.73	266.05	829.124	431.414
20	0.19	528.805	1291.98	212.7	561.186	1285.4	146.09	563.125	1285.55	281.416	664.934	1111.71	63.0049	689.742	1113.31	361.52	593.157	1061.98	215.01	704.86	774.671	-91.0452	439.339	843.944	-114.276	443.897	848.691	-36.7408	358.393	864.886	-69.3632	263.613	834.183	-68.3331	696.652	770.792	506.022	427.762	846.047	479.659	450.688	845.29	401.17	372.143	873.567	432.725	266.064	829.12	431.406
21	0.2	528.771	1292	212.729	561.147	1285.41	146.11	563.139	1285.55	281.423	664.933	1111.71	63.0195	689.769	1113.33	361.54	593.132	1061.99	215.042	704.855	774.656	-91.0515	439.313	843.958	-114.249	443.892	848.707	-36.7271	358.416	864.896	-69.3438	263.625	834.191	-68.3122	696.658	770.802	506.009	427.777	846.059	479.679	450.655	845.291	401.176	372.149	873.578	432.734	265.98	829.164	431.45
22	0.21	528.79	1291.99	212.7	561.129	1285.43	146.06	563.114	1285.54	281.401	664.91	1111.72	62.9982	689.728	1113.34	361.534	593.153	1061.99	215.015	704.785	774.627	-91.0983	439.276	843.966	-114.282	443.864	848.703	-36.7482	358.401	864.888	-69.3769	263.619	834.209	-68.3368	696.636	770.824	506.001	427.759	846.079	479.67	450.578	845.292	401.141	372.123	873.595	432.735	265.942	829.217	431.441
23	0.22	528.845	1291.93	212.634	561.217	1285.41	145.964	563.091	1285.53	281.317	664.891	1111.71	62.9681	689.738	1113.32	361.474	593.234	1061.9	214.93	704.792	774.638	-91.1168	439.286	843.943	-114.328	443.88	848.661	-36.7961	358.406	864.849	-69.4392	263.633	834.189	-68.4072	696.636	770.824	505.982	427.754	846.074	479.631	450.482	845.273	401.059	372.115	873.604	432.718	266.028	829.193	431.404
24	0.23	528.901	1291.86	212.606	561.305	1285.35	145.944	563.123	1285.48	281.275	664.909	1111.69	62.9559	689.783	1113.29	361.421	593.329	1061.81	214.892	704.814	774.653	-91.1262	439.33	843.907	-114.347	443.961	848.626	-36.8409	358.462	864.799	-69.4673	263.667	834.182	-68.4202	696.661	770.828	505.978	427.758	846.078	479.616	450.458	845.256	401	372.143	873.62	432.715	266.116	829.178	431.414
25	0.24	528.911	1291.85	212.62	561.335	1285.31	145.948	563.174	1285.46	281.292	664.925	1111.69	62.9739	689.809	1113.3	361.456	593.329	1061.8	214.924	704.84	774.649	-91.1359	439.352	843.906	-114.329	443.993	848.624	-36.8348	358.503	864.794	-69.4441	263.66	834.204	-68.3675	696.689	770.826	505.98	427.759	846.079	479.637	450.454	845.254	401.015	372.147	873.636	432.737	266.119	829.174	431.425
26	0.25	528.894	1291.85	212.61	561.252	1285.33	145.97	563.152	1285.48	281.318	664.913	1111.7	62.9626	689.792	1113.31	361.493	593.274	1061.84	214.948	704.813	774.62	-91.1467	439.317	843.93	-114.306	443.944	848.629	-36.8044	358.457	864.818	-69.4109	263.638	834.21	-68.3209	696.687	770.811	505.97	427.751	846.073	479.661	450.469	845.254	401.055	372.134	873.614	432.746	266.082	829.183	431.439
27	0.26	528.872	1291.87	212.592	561.181	1285.36	145.984	563.138	1285.5	281.316	664.913	1111.7	62.9377	689.79	1113.29	361.457	593.209	1061.9	214.932	704.798	774.636	-91.1445	439.287	843.955	-114.323	443.916	848.637	-36.7918	358.396	864.835	-69.397	263.606	834.203	-68.3285	696.687	770.809	505.951	427.737	846.07	479.64	450.503	845.271	401.074	372.128	873.587	432.72	266.028	829.185	431.425
28	0.27	528.859	1291.93	212.596	561.221	1285.36	145.972	563.141	1285.53	281.324	664.941	1111.69	62.9406	689.804	1113.3	361.457	593.201	1061.91	214.96	704.797	774.626	-91.1581	439.31	843.953	-114.312	443.908	848.656	-36.7725	358.391	864.863	-69.386	263.626	834.198	-68.3639	696.696	770.806	505.959	427.765	846.069	479.641	450.566	845.286	401.098	372.15	873.576	432.715	266.012	829.195	431.406
29	0.28	528.879	1291.97	212.645	561.228	1285.38	145.999	563.177	1285.56	281.365	664.961	1111.68	62.9635	689.795	1113.31	361.485	593.202	1061.93	214.996	704.793	774.607	-91.1464	439.346	843.943	-114.282	443.911	848.672	-36.7368	358.388	864.883	-69.3526	263.629	834.192	-68.3541	696.691	770.799	505.971	427.782	846.07	479.672	450.619	845.305	401.142	372.139	873.562	432.738	266.015	829.183	431.445
30	0.29	528.826	1292.03	212.645	561.209	1285.4	146.017	563.156	1285.57	281.37	664.958	1111.68	62.974	689.79	1113.31	361.495	593.183	1061.94	215.012	704.755	774.576	-91.175	439.331	843.948	-114.269	443.89	848.679	-36.7142	358.371	864.897	-69.3321	263.59	834.2	-68.3177	696.688	770.803	505.956	427.777	846.058	479.688	450.643	845.293	401.191	372.127	873.565	432.754	265.97	829.179	431.478
31	0.3	528.849	1292	212.605	561.271	1285.39	145.934	563.151	1285.57	281.297	664.946	1111.68	62.9446	689.825	1113.3	361.449	593.207	1061.9	214.978	704.753	774.578	-91.174	439.321	843.94	-114.295	443.892	848.669	-36.7637	358.403	864.867	-69.375	263.654	834.184	-68.3828	696.683	770.795	505.935	427.78	846.053	479.657	450.638	845.273	401.156	372.142	873.583	432.748	265.996	829.146	431.445
32	0.31	528.912	1291.95	212.566	561.398	1285.37	145.853	563.241	1285.56	281.217	664.945	1111.68	62.9323	689.877	1113.3	361.433	593.325	1061.82	214.913	704.773	774.607	-91.1724	439.372	843.923	-114.348	443.971	848.629	-36.8205	358.477	864.821	-69.4237	263.725	834.187	-68.435	696.701	770.811	505.951	427.789	846.061	479.641	450.623	845.242	401.077	372.129	873.607	432.75	266.148	829.142	431.393
33	0.32	528.949	1291.95	212.524	561.447	1285.36	145.85	563.247	1285.56	281.19	664.917	1111.68	62.9256	689.86	1113.3	361.44	593.358	1061.81	214.898	704.788	774.629	-91.1741	439.364	843.922	-114.332	444.004	848.612	-36.8291	358.476	864.809	-69.4422	263.687	834.193	-68.4107	696.68	770.828	505.95	427.799	846.083	479.66	450.579	845.23	401.047	372.117	873.62	432.754	266.203	829.15	431.404
34	0.33	528.902	1291.99	212.506	561.387	1285.39	145.836	563.184	1285.61	281.173	664.885	1111.69	62.9276	689.831	1113.32	361.421	593.296	1061.84	214.889	704.778	774.621	-91.1586	439.333	843.923	-114.314	443.963	848.617	-36.8103	358.417	864.829	-69.4318	263.645	834.21	-68.4031	696.674	770.838	505.928	427.768	846.096	479.648	450.521	845.249	401.047	372.125	873.625	432.74	266.076	829.213	431.447
35	0.34	528.925	1292.01	212.496	561.392	1285.41	145.793	563.148	1285.65	281.161	664.874	1111.69	62.9179	689.794	1113.35	361.398	593.258	1061.86	214.863	704.761	774.603	-91.1704	439.337	843.934	-114.324	443.959	848.623	-36.8201	358.409	864.832	-69.4543	263.654	834.21	-68.4384	696.669	770.843	505.92	427.743	846.105	479.626	450.465	845.268	401.029	372.127	873.632	432.728	266.037	829.205	431.43
36	0.35	528.978	1292	212.479	561.425	1285.44	145.785	563.126	1285.66	281.167	664.874	1111.69	62.9134	689.792	1113.34	361.385	593.286	1061.87	214.862	704.731	774.601	-91.1676	439.311	843.935	-114.329	443.961	848.632	-36.807	358.417	864.842	-69.4406	263.653	834.187	-68.4357	696.657	770.837	505.93	427.745	846.094	479.624	450.48	845.288	401.031	372.114	873.619	432.721	266.022	829.192	431.438
37	0.36	528.957	1292.03	212.521	561.399	1285.45	145.816	563.148	1285.68	281.192	664.881	1111.69	62.9167	689.799	1113.32	361.397	593.243	1061.91	214.918	704.726	774.572	-91.1549	439.295	843.942	-114.302	443.928	848.648	-36.7574	358.404	864.865	-69.3933	263.626	834.171	-68.3889	696.673	770.841	505.941	427.735	846.091	479.638	450.529	845.293	401.075	372.103	873.584	432.725	265.978	829.181	431.447
38	0.37	528.944	1292.09	212.545	561.328	1285.45	145.854	563.177	1285.7	281.233	664.889	1111.67	62.9264	689.776	1113.31	361.414	593.236	1061.93	214.949	704.779	774.569	-91.1453	439.303	843.942	-114.28	443.931	848.658	-36.738	358.369	864.866	-69.3567	263.574	834.185	-68.3235	696.707	770.84	505.938	427.759	846.082	479.661	450.578	845.29	401.122	372.107	873.576	432.74	265.964	829.188	431.455
39	0.38	528.92	1292.1	212.547	561.35	1285.48	145.838	563.211	1285.69	281.235	664.881	1111.66	62.928	689.771	1113.31	361.409	593.254	1061.92	214.942	704.779	774.545	-91.1502	439.307	843.965	-114.29	443.922	848.665	-36.7538	358.389	864.865	-69.37	263.627	834.187	-68.3464	696.702	770.817	505.946	427.798	846.062	479.664	450.584	845.274	401.115	372.138	873.573	432.736	266.055	829.18	431.442
40	0.39	528.94	1292.07	212.528	561.389	1285.47	145.8	563.242	1285.67	281.194	664.86	1111.64	62.921	689.758	1113.31	361.402	593.285	1061.89	214.913	704.751	774.511	-91.1441	439.322	843.959	-114.31	443.923	848.654	-36.7762	358.397	864.87	-69.3859	263.725	834.189	-68.4228	696.695	770.823	505.961	427.81	846.063	479.649	450.596	845.257	401.102	372.167	873.577	432.725	266.175	829.14	431.411
41	0.4	528.965	1292.04	212.542	561.399	1285.45	145.798	563.226	1285.66	281.211	664.849	1111.64	62.9229	689.767	1113.3	361.418	593.244	1061.88	214.917	704.746	774.522	-91.1555	439.329	843.949	-114.3	443.893	848.643	-36.755	358.39	864.866	-69.3905	263.704	834.193	-68.4199	696.705	770.839	505.954	427.812	846.066	479.66	450.618	845.252	401.117	372.158	873.575	432.727	266.046	829.182	431.449
42	0.41	528.893	1292.05	212.608	561.364	1285.46	145.826	563.206	1285.68	281.239	664.844	1111.64	62.9316	689.758	1113.29	361.436	593.233	1061.88	214.953	704.744	774.537	-91.1414	439.32	843.955	-114.291	443.9	848.642	-36.7396	358.398	864.854	-69.3739	263.619	834.2	-68.3594	696.688	770.84	505.963	427.805	846.057	479.669	450.6	845.258	401.12	372.128	873.572	432.739	265.995	829.186	431.467
43	0.42	528.888	1292.02	212.585	561.36	1285.42	145.823	563.19	1285.65	281.237	664.834	1111.63	62.9312	689.743	1113.28	361.425	593.26	1061.84	214.943	704.753	774.528	-91.1121	439.336	843.922	-114.309	443.907	848.626	-36.7561	358.448	864.816	-69.3905	263.692	834.168	-68.4195	696.67	770.83	505.97	427.787	846.05	479.669	450.567	845.256	401.095	372.115	873.574	432.74	266.059	829.136	431.443
44	0.43	528.94	1291.96	212.503	561.32	1285.38	145.81	563.164	1285.6	281.21	664.805	1111.62	62.9232	689.735	1113.28	361.4	593.309	1061.75	214.898	704.783	774.556	-91.1132	439.36	843.868	-114.337	443.91	848.59	-36.8025	358.445	864.79	-69.4271	263.708	834.155	-68.459	696.634	770.818	505.949	427.744	846.035	479.634	450.53	845.24	401.057	372.098	873.57	432.73	266.093	829.103	431.419
45	0.44	528.926	1291.92	212.473	561.28	1285.37	145.823	563.152	1285.59	281.204	664.799	1111.64	62.9234	689.74	1113.28	361.405	593.348	1061.73	214.894	704.801	774.6	-91.1454	439.368	843.877	-114.331	443.934	848.569	-36.8093	358.425	864.804	-69.4386	263.65	834.164	-68.4087	696.627	770.813	505.94	427.742	846.034	479.63	450.547	845.24	401.052	372.086	873.575	432.727	266.056	829.132	431.42
46	0.45	528.89	1291.89	212.527	561.236	1285.37	145.861	563.134	1285.59	281.25	664.802	1111.65	62.9428	689.748	1113.29	361.441	593.322	1061.78	214.929	704.778	774.591	-91.1521	439.342	843.917	-114.296	443.926	848.593	-36.7736	358.433	864.82	-69.4016	263.646	834.18	-68.3842	696.669	770.812	505.959	427.767	846.053	479.659	450.587	845.258	401.088	372.108	873.597	432.758	265.968	829.19	431.476
47	0.46	528.79	1291.92	212.556	561.163	1285.38	145.893	563.073	1285.61	281.285	664.796	1111.66	62.947	689.736	1113.3	361.454	593.26	1061.84	214.963	704.756	774.591	-91.1415	439.336	843.939	-114.281	443.919	848.63	-36.7645	358.404	864.853	-69.3795	263.669	834.197	-68.4338	696.665	770.822	505.969	427.76	846.075	479.66	450.542	845.28	401.1	372.093	873.626	432.766	266.027	829.195	431.482
48	0.47	528.742	1291.96	212.533	561.122	1285.39	145.885	563.018	1285.61	281.273	664.795	1111.68	62.9383	689.75	1113.3	361.428	593.23	1061.87	214.946	704.787	774.617	-91.1639	439.349	843.947	-114.332	443.929	848.659	-36.7921	358.372	864.878	-69.4218	263.69	834.206	-68.4656	696.651	770.825	505.957	427.741	846.096	479.629	450.532	845.302	401.092	372.11	873.642	432.736	266.123	829.178	431.414
49	0.48	528.725	1292.01	212.553	561.045	1285.38	145.916	562.96	1285.6	281.258	664.813	1111.7	62.9363	689.745	1113.31	361.436	593.194	1061.9	214.939	704.816	774.66	-91.1706	439.328	843.97	-114.339	443.925	848.697	-36.806	358.404	864.896	-69.4473	263.659	834.2	-68.4387	696.664	770.827	505.942	427.767	846.098	479.618	450.555	845.306	401.079	372.133	873.63	432.717	266.096	829.17	431.405
50	0.49	528.638	1292.02	212.646	560.982	1285.37	146.018	562.958	1285.57	281.326	664.831	1111.71	62.9587	689.753	1113.31	361.451	593.182	1061.93	214.968	704.809	774.665	-91.1621	439.301	843.987	-114.311	443.889	848.704	-36.7512	358.396	864.91	-69.3944	263.646	834.205	-68.3837	696.676	770.808	505.947	427.816	846.098	479.651	450.58	845.306	401.114	372.131	873.612	432.74	266.069	829.168	431.44
51	0.5	528.627	1291.94	212.697	560.91	1285.35	146.095	563.009	1285.5	281.377	664.832	1111.69	62.9888	689.769	1113.3	361.472	593.241	1061.89	214.979	704.821	774.645	-91.1594	439.313	843.968	-114.286	443.889	848.676	-36.7359	358.386	864.891	-69.3807	263.659	834.193	-68.3871	696.689	770.791	505.957	427.809	846.077	479.664	450.593	845.301	401.137	372.135	873.603	432.759	266.117	829.143	431.443
52	0.51	528.69	1291.86	212.713	560.86	1285.3	146.106	563.03	1285.44	281.385	664.848	1111.67	62.9798	689.745	1113.25	361.455	593.288	1061.82	214.959	704.794	774.629	-91.1872	439.317	843.95	-114.308	443.916	848.635	-36.7749	358.438	864.837	-69.4276	263.659	834.19	-68.401	696.682	770.776	505.952	427.782	846.046	479.65	450.547	845.292	401.091	372.108	873.57	432.738	266.098	829.1	431.419
53	0.52	528.735	1291.82	212.731	560.842	1285.26	146.144	563.032	1285.38	281.385	664.851	1111.65	62.9769	689.751	1113.22	361.454	593.285	1061.75	214.958	704.817	774.647	-91.1991	439.341	843.928	-114.317	443.953	848.595	-36.7868	358.454	864.795	-69.4314	263.657	834.184	-68.4066	696.708	770.766	505.939	427.768	846.026	479.658	450.564	845.253	401.072	372.104	873.549	432.73	266.081	829.081	431.43
54	0.53	528.751	1291.81	212.783	560.823	1285.23	146.213	563.048	1285.34	281.452	664.856	1111.64	63.0066	689.776	1113.21	361.505	593.329	1061.72	215.014	704.818	774.637	-91.1706	439.322	843.916	-114.279	443.948	848.584	-36.7527	358.44	864.781	-69.3712	263.645	834.185	-68.3712	696.734	770.767	505.932	427.802	846.026	479.689	450.554	845.237	401.099	372.106	873.546	432.756	266.039	829.109	431.479
55	0.54	528.661	1291.83	212.846	560.786	1285.24	146.233	563.058	1285.34	281.498	664.821	1111.65	63.0207	689.77	1113.23	361.515	593.337	1061.72	215.03	704.804	774.622	-91.1564	439.322	843.924	-114.285	443.927	848.58	-36.7411	358.436	864.803	-69.3576	263.626	834.196	-68.3695	696.721	770.765	505.922	427.803	846.029	479.687	450.561	845.243	401.11	372.105	873.559	432.772	265.998	829.145	431.504
56	0.55	528.599	1291.84	212.827	560.735	1285.25	146.218	563.041	1285.35	281.476	664.771	1111.65	62.9928	689.763	1113.23	361.478	593.35	1061.7	214.979	704.769	774.602	-91.1912	439.331	843.905	-114.334	443.919	848.589	-36.7916	358.437	864.805	-69.4259	263.613	834.198	-68.4131	696.694	770.755	505.905	427.767	846.031	479.648	450.565	845.23	401.068	372.114	873.573	432.749	266.005	829.171	431.469
57	0.56	528.641	1291.84	212.8	560.783	1285.27	146.211	563.022	1285.38	281.434	664.772	1111.67	62.9578	689.793	1113.25	361.461	593.329	1061.74	214.948	704.789	774.626	-91.2088	439.347	843.915	-114.354	443.949	848.609	-36.8343	358.46	864.812	-69.4596	263.659	834.211	-68.4585	696.723	770.756	505.892	427.768	846.055	479.619	450.584	845.234	401.05	372.124	873.599	432.742	266.078	829.181	431.422
58	0.57	528.672	1291.89	212.825	560.773	1285.32	146.277	563.003	1285.44	281.487	664.805	1111.69	62.9857	689.822	1113.26	361.503	593.274	1061.82	214.987	704.832	774.678	-91.166	439.352	843.938	-114.332	443.945	848.652	-36.7983	358.463	864.848	-69.4357	263.688	834.215	-68.4266	696.751	770.767	505.899	427.79	846.079	479.639	450.583	845.279	401.078	372.157	873.621	432.746	266.071	829.241	431.429
59	0.58	528.593	1291.95	212.851	560.735	1285.34	146.312	562.95	1285.48	281.55	664.809	1111.71	63.0196	689.785	1113.26	361.537	593.202	1061.91	215.029	704.817	774.684	-91.1455	439.338	843.965	-114.317	443.906	848.705	-36.7593	358.424	864.882	-69.3981	263.646	834.231	-68.3921	696.739	770.768	505.895	427.798	846.091	479.649	450.569	845.31	401.109	372.137	873.63	432.748	266.083	829.244	431.418
60	0.59	528.595	1291.93	212.853	560.743	1285.34	146.306	562.958	1285.49	281.56	664.768	1111.71	63.0263	689.723	1113.26	361.532	593.135	1061.94	215.036	704.811	774.677	-91.173	439.317	843.984	-114.323	443.881	848.718	-36.7617	358.384	864.891	-69.3986	263.67	834.209	-68.4439	696.712	770.753	505.883	427.765	846.083	479.632	450.566	845.32	401.116	372.077	873.618	432.731	266.003	829.234	431.421
61	0.6	528.685	1291.92	212.872	560.75	1285.34	146.32	562.987	1285.48	281.567	664.75	1111.71	63.023	689.739	1113.26	361.544	593.224	1061.88	215.029	704.786	774.683	-91.1756	439.319	843.949	-114.324	443.906	848.673	-36.785	358.378	864.88	-69.4071	263.677	834.192	-68.4236	696.717	770.744	505.898	427.748	846.059	479.644	450.563	845.318	401.107	372.076	873.601	432.732	265.934	829.199	431.435
62	0.61	528.763	1291.86	212.921	560.77	1285.32	146.364	563.014	1285.44	281.59	664.785	1111.7	63.0569	689.78	1113.23	361.583	593.341	1061.78	215.069	704.792	774.697	-91.1587	439.353	843.901	-114.306	443.939	848.623	-36.7833	358.418	864.837	-69.3909	263.648	834.188	-68.3509	696.712	770.745	505.919	427.768	846.046	479.683	450.568	845.286	401.109	372.113	873.597	432.76	265.976	829.182	431.455
63	0.62	528.794	1291.84	212.941	560.787	1285.31	146.38	563.067	1285.41	281.606	664.768	1111.69	63.0765	689.79	1113.21	361.597	593.394	1061.7	215.091	704.827	774.723	-91.1552	439.339	843.909	-114.292	443.961	848.588	-36.7874	358.441	864.803	-69.3914	263.641	834.185	-68.3548	696.697	770.737	505.927	427.779	846.031	479.695	450.589	845.239	401.126	372.116	873.599	432.776	266.074	829.143	431.459
64	0.63	528.752	1291.87	212.934	560.792	1285.33	146.375	563.123	1285.4	281.589	664.723	1111.67	63.0571	689.804	1113.19	361.57	593.356	1061.7	215.068	704.854	774.734	-91.1439	439.346	843.891	-114.334	443.968	848.58	-36.8156	358.447	864.782	-69.4228	263.642	834.199	-68.3927	696.691	770.735	505.92	427.753	846.027	479.656	450.582	845.214	401.105	372.12	873.599	432.765	266.11	829.138	431.441
65	0.64	528.824	1291.86	212.924	560.846	1285.33	146.334	563.169	1285.39	281.559	664.744	1111.67	63.0618	689.832	1113.19	361.563	593.357	1061.72	215.039	704.883	774.729	-91.1396	439.398	843.879	-114.357	443.973	848.584	-36.8148	358.483	864.762	-69.4568	263.665	834.201	-68.3991	696.725	770.748	505.922	427.773	846.025	479.64	450.581	845.208	401.082	372.147	873.6	432.753	266.154	829.137	431.417
66	0.65	528.886	1291.89	212.949	560.935	1285.37	146.332	563.168	1285.43	281.593	664.793	1111.67	63.0816	689.866	1113.19	361.592	593.341	1061.75	215.079	704.879	774.718	-91.1187	439.362	843.899	-114.327	443.988	848.602	-36.7932	358.481	864.793	-69.4322	263.693	834.192	-68.3636	696.728	770.735	505.933	427.813	846.033	479.672	450.611	845.215	401.109	372.191	873.589	432.763	266.155	829.173	431.443
67	0.66	528.828	1291.98	212.962	560.933	1285.4	146.338	563.115	1285.5	281.638	664.791	1111.68	63.0911	689.823	1113.2	361.601	593.272	1061.84	215.115	704.815	774.684	-91.1112	439.322	843.948	-114.306	443.923	848.661	-36.7587	358.398	864.857	-69.3852	263.681	834.213	-68.3709	696.7	770.713	505.939	427.81	846.042	479.689	450.608	845.25	401.135	372.188	873.587	432.761	266.11	829.152	431.461
68	0.67	528.761	1292.04	212.947	560.903	1285.44	146.326	563.091	1285.53	281.633	664.792	1111.69	63.0919	689.794	1113.21	361.608	593.224	1061.88	215.118	704.862	774.687	-91.1229	439.307	843.957	-114.304	443.89	848.686	-36.7462	358.329	864.895	-69.3795	263.684	834.221	-68.4162	696.685	770.704	505.928	427.79	846.049	479.672	450.589	845.296	401.139	372.154	873.586	432.738	266.113	829.136	431.433
69	0.68	528.749	1292.06	212.956	560.935	1285.46	146.318	563.107	1285.55	281.625	664.794	1111.69	63.0713	689.803	1113.22	361.617	593.243	1061.86	215.111	704.856	774.695	-91.1316	439.309	843.958	-114.308	443.898	848.681	-36.7527	358.373	864.873	-69.408	263.678	834.228	-68.4119	696.688	770.7	505.93	427.785	846.045	479.667	450.592	845.309	401.122	372.136	873.576	432.733	266.14	829.122	431.395
70	0.69	528.877	1292.01	212.954	561.025	1285.48	146.338	563.126	1285.55	281.648	664.819	1111.7	63.0863	689.811	1113.23	361.636	593.297	1061.85	215.127	704.821	774.69	-91.1179	439.314	843.952	-114.293	443.918	848.67	-36.7452	358.401	864.869	-69.3944	263.648	834.234	-68.3689	696.69	770.688	505.946	427.813	846.045	479.687	450.575	845.311	401.121	372.134	873.585	432.761	266.134	829.141	431.45
71	0.7	528.966	1291.98	212.954	561.036	1285.49	146.347	563.15	1285.55	281.627	664.814	1111.7	63.0828	689.803	1113.23	361.629	593.333	1061.81	215.089	704.811	774.687	-91.1063	439.295	843.943	-114.278	443.939	848.645	-36.7698	358.403	864.868	-69.399	263.578	834.257	-68.3662	696.695	770.699	505.942	427.799	846.063	479.687	450.54	845.301	401.103	372.1	873.601	432.769	266.126	829.15	431.45
72	0.71	528.948	1292	212.935	561.073	1285.47	146.319	563.123	1285.57	281.572	664.811	1111.7	63.0641	689.806	1113.21	361.594	593.307	1061.82	215.045	704.851	774.705	-91.1085	439.296	843.926	-114.294	443.933	848.635	-36.8096	358.424	864.845	-69.4459	263.579	834.237	-68.3884	696.677	770.717	505.927	427.743	846.071	479.647	450.497	845.286	401.059	372.072	873.62	432.759	266.068	829.181	431.426
73	0.72	529.018	1292	212.914	561.134	1285.48	146.284	563.17	1285.58	281.55	664.833	1111.7	63.0559	689.842	1113.19	361.574	593.337	1061.8	215.025	704.842	774.709	-91.1179	439.301	843.924	-114.316	443.955	848.629	-36.8322	358.438	864.824	-69.474	263.646	834.202	-68.4244	696.666	770.714	505.921	427.724	846.06	479.64	450.51	845.273	401.054	372.089	873.625	432.752	266.035	829.212	431.445
74	0.73	529.117	1292.02	212.952	561.174	1285.5	146.306	563.238	1285.58	281.597	664.856	1111.7	63.0775	689.846	1113.21	361.603	593.387	1061.8	215.082	704.799	774.69	-91.1007	439.31	843.924	-114.319	443.984	848.62	-36.8095	358.425	864.838	-69.4305	263.681	834.203	-68.4424	696.693	770.71	505.939	427.772	846.068	479.671	450.57	845.267	401.091	372.136	873.628	432.77	266	829.23	431.485
75	0.74	529.13	1292.04	212.997	561.161	1285.53	146.345	563.238	1285.59	281.64	664.859	1111.71	63.0912	689.884	1113.21	361.61	593.357	1061.83	215.13	704.77	774.676	-91.1253	439.314	843.934	-114.304	443.937	848.617	-36.7678	358.399	864.844	-69.3861	263.661	834.2	-68.4241	696.695	770.702	505.944	427.784	846.062	479.689	450.605	845.265	401.135	372.134	873.607	432.778	266.063	829.18	431.476
76	0.75	529.053	1292.06	213.004	561.174	1285.53	146.333	563.237	1285.59	281.65	664.85	1111.7	63.091	689.869	1113.19	361.612	593.331	1061.83	215.115	704.762	774.66	-91.1243	439.317	843.923	-114.295	443.879	848.616	-36.7682	358.386	864.831	-69.3806	263.631	834.208	-68.3968	696.676	770.69	505.942	427.767	846.043	479.688	450.612	845.267	401.143	372.083	873.58	432.768	266.049	829.137	431.461
77	0.76	529.092	1292.02	212.993	561.221	1285.5	146.334	563.29	1285.58	281.623	664.863	1111.69	63.0884	689.854	1113.18	361.615	593.388	1061.81	215.087	704.808	774.667	-91.1003	439.341	843.904	-114.311	443.93	848.602	-36.7917	358.427	864.791	-69.416	263.723	834.209	-68.4304	696.688	770.676	505.931	427.768	846.026	479.67	450.594	845.265	401.112	372.077	873.571	432.759	266.039	829.128	431.44
78	0.77	529.151	1292.03	212.996	561.268	1285.5	146.331	563.356	1285.57	281.627	664.892	1111.67	63.0753	689.893	1113.16	361.593	593.438	1061.82	215.1	704.828	774.678	-91.1213	439.343	843.919	-114.31	443.96	848.612	-36.7885	358.45	864.803	-69.4209	263.685	834.205	-68.4134	696.712	770.678	505.927	427.792	846.027	479.671	450.615	845.258	401.105	372.1	873.567	432.761	266.112	829.106	431.447
79	0.78	529.19	1292.11	213.021	561.256	1285.55	146.36	563.353	1285.63	281.636	664.885	1111.69	63.0938	689.905	1113.2	361.624	593.378	1061.85	215.137	704.823	774.699	-91.1375	439.309	843.947	-114.282	443.919	848.639	-36.7667	358.421	864.838	-69.3894	263.599	834.227	-68.3504	696.701	770.687	505.909	427.799	846.043	479.679	450.597	845.285	401.121	372.126	873.592	432.774	266.082	829.136	431.479
80	0.79	529.183	1292.14	213.008	561.236	1285.58	146.34	563.291	1285.68	281.616	664.873	1111.72	63.0991	689.906	1113.23	361.624	593.341	1061.88	215.126	704.801	774.702	-91.1184	439.313	843.949	-114.286	443.916	848.659	-36.763	358.401	864.858	-69.3946	263.65	834.228	-68.3651	696.714	770.708	505.889	427.794	846.059	479.671	450.536	845.298	401.113	372.114	873.607	432.783	266.029	829.214	431.466
81	0.8	529.177	1292.16	212.974	561.319	1285.59	146.26	563.345	1285.7	281.564	664.869	1111.73	63.0646	689.94	1113.22	361.589	593.4	1061.85	215.079	704.792	774.694	-91.1045	439.322	843.922	-114.31	443.943	848.656	-36.8032	358.427	864.849	-69.4476	263.647	834.249	-68.3902	696.697	770.707	505.891	427.786	846.077	479.652	450.529	845.278	401.076	372.108	873.617	432.769	266.148	829.213	431.417
82	0.81	529.167	1292.17	212.927	561.395	1285.59	146.215	563.402	1285.68	281.538	664.896	1111.72	63.0412	689.999	1113.21	361.565	593.454	1061.84	215.04	704.799	774.692	-91.1239	439.342	843.929	-114.349	443.957	848.645	-36.8253	358.465	864.832	-69.483	263.653	834.245	-68.4214	696.702	770.706	505.874	427.78	846.086	479.635	450.56	845.27	401.043	372.141	873.623	432.742	266.096	829.236	431.415
83	0.82	529.2	1292.2	212.938	561.376	1285.63	146.229	563.411	1285.69	281.543	664.911	1111.72	63.0465	689.999	1113.22	361.564	593.415	1061.86	215.067	704.828	774.697	-91.1381	439.315	843.937	-114.34	443.924	848.665	-36.8084	358.417	864.846	-69.4513	263.657	834.232	-68.4166	696.742	770.714	505.865	427.778	846.091	479.644	450.564	845.267	401.076	372.177	873.63	432.748	266.013	829.23	431.448
84	0.83	529.219	1292.25	212.95	561.359	1285.65	146.251	563.413	1285.72	281.573	664.911	1111.7	63.0651	689.961	1113.21	361.583	593.333	1061.91	215.085	704.825	774.686	-91.1402	439.306	843.942	-114.313	443.908	848.677	-36.7775	358.376	864.858	-69.394	263.656	834.211	-68.4205	696.733	770.694	505.874	427.797	846.076	479.666	450.555	845.281	401.105	372.194	873.618	432.768	266.015	829.245	431.46
85	0.84	529.233	1292.27	212.956	561.413	1285.63	146.252	563.415	1285.73	281.591	664.925	1111.68	63.0638	689.955	1113.17	361.573	593.361	1061.89	215.074	704.801	774.635	-91.1355	439.313	843.932	-114.31	443.905	848.652	-36.7833	358.388	864.856	-69.3892	263.632	834.221	-68.3946	696.743	770.679	505.883	427.815	846.05	479.671	450.594	845.282	401.115	372.156	873.585	432.764	266.094	829.196	431.425
86	0.85	529.307	1292.23	212.961	561.489	1285.6	146.23	563.471	1285.71	281.577	664.959	1111.67	63.0478	689.977	1113.14	361.548	593.418	1061.85	215.064	704.847	774.635	-91.1646	439.333	843.915	-114.31	443.946	848.627	-36.7969	358.432	864.83	-69.4116	263.617	834.218	-68.3923	696.769	770.698	505.887	427.817	846.033	479.662	450.615	845.274	401.085	372.156	873.56	432.756	266.142	829.124	431.4
87	0.86	529.366	1292.17	212.976	561.554	1285.59	146.226	563.53	1285.7	281.575	664.974	1111.66	63.0545	689.976	1113.14	361.565	593.448	1061.82	215.082	704.883	774.66	-91.1829	439.343	843.903	-114.318	443.939	848.607	-36.7805	358.447	864.817	-69.4007	263.639	834.206	-68.3913	696.795	770.696	505.883	427.797	846.028	479.678	450.599	845.268	401.083	372.18	873.561	432.761	266.06	829.138	431.446
88	0.87	529.414	1292.18	212.966	561.556	1285.6	146.233	563.527	1285.72	281.588	664.949	1111.67	63.065	689.969	1113.16	361.577	593.43	1061.81	215.101	704.843	774.646	-91.175	439.325	843.922	-114.307	443.899	848.6	-36.7699	358.442	864.813	-69.3971	263.634	834.216	-68.3653	696.774	770.687	505.884	427.801	846.029	479.69	450.55	845.278	401.092	372.162	873.575	432.774	266.069	829.165	431.461
89	0.88	529.352	1292.24	212.932	561.575	1285.61	146.194	563.487	1285.74	281.54	664.898	1111.69	63.0494	689.951	1113.18	361.565	593.407	1061.85	215.066	704.819	774.657	-91.1561	439.326	843.927	-114.309	443.899	848.615	-36.7948	358.436	864.821	-69.4124	263.654	834.23	-68.364	696.716	770.681	505.865	427.783	846.049	479.668	450.528	845.283	401.075	372.124	873.598	432.771	266.069	829.161	431.442
90	0.89	529.381	1292.27	212.892	561.584	1285.63	146.172	563.459	1285.78	281.504	664.872	1111.7	63.0277	689.923	1113.19	361.53	593.39	1061.87	215.032	704.793	774.639	-91.1675	439.325	843.925	-114.334	443.918	848.628	-36.817	358.445	864.814	-69.4528	263.64	834.217	-68.3814	696.716	770.702	505.857	427.762	846.071	479.646	450.512	845.282	401.042	372.112	873.623	432.761	266.089	829.162	431.441
91	0.9	529.402	1292.3	212.891	561.55	1285.66	146.196	563.46	1285.81	281.519	664.883	1111.72	63.0374	689.923	1113.21	361.535	593.42	1061.86	215.048	704.782	774.674	-91.1713	439.314	843.922	-114.334	443.926	848.625	-36.7885	358.441	864.811	-69.4359	263.627	834.217	-68.3851	696.72	770.711	505.87	427.747	846.085	479.653	450.504	845.294	401.054	372.094	873.627	432.768	266.052	829.184	431.467
92	0.91	529.368	1292.34	212.92	561.523	1285.66	146.209	563.395	1285.85	281.534	664.902	1111.73	63.053	689.928	1113.22	361.572	593.39	1061.9	215.073	704.786	774.715	-91.1372	439.341	843.928	-114.323	443.908	848.639	-36.7466	358.446	864.824	-69.4194	263.644	834.218	-68.4087	696.7	770.708	505.893	427.765	846.086	479.667	450.485	845.329	401.079	372.071	873.632	432.788	266.036	829.189	431.469
93	0.92	529.33	1292.33	212.937	561.542	1285.65	146.19	563.36	1285.87	281.528	664.89	1111.73	63.0454	689.911	1113.2	361.574	593.374	1061.91	215.077	704.781	774.713	-91.1348	439.343	843.926	-114.317	443.892	848.642	-36.7499	358.417	864.842	-69.4182	263.679	834.202	-68.4455	696.699	770.714	505.894	427.744	846.09	479.662	450.467	845.348	401.082	372.058	873.615	432.777	266.021	829.171	431.45
94	0.93	529.351	1292.29	212.898	561.593	1285.65	146.142	563.397	1285.86	281.525	664.901	1111.73	63.0385	689.924	1113.19	361.557	593.352	1061.89	215.069	704.796	774.69	-91.1655	439.331	843.918	-114.336	443.927	848.624	-36.7937	358.421	864.843	-69.4295	263.686	834.164	-68.4445	696.697	770.713	505.875	427.747	846.088	479.652	450.467	845.329	401.072	372.083	873.615	432.772	266.088	829.153	431.428
95	0.94	529.405	1292.28	212.894	561.609	1285.65	146.138	563.452	1285.84	281.52	664.91	1111.72	63.0508	689.966	1113.18	361.571	593.376	1061.87	215.072	704.802	774.691	-91.1611	439.343	843.921	-114.324	443.976	848.624	-36.8061	358.472	864.83	-69.4255	263.662	834.189	-68.3949	696.728	770.714	505.876	427.762	846.079	479.669	450.526	845.301	401.089	372.11	873.624	432.777	266.104	829.176	431.433
96	0.95	529.411	1292.29	212.893	561.61	1285.66	146.153	563.469	1285.82	281.506	664.901	1111.71	63.0483	689.982	1113.19	361.586	593.412	1061.86	215.063	704.8	774.679	-91.1412	439.369	843.935	-114.319	443.971	848.638	-36.7959	358.484	864.829	-69.4279	263.618	834.217	-68.3758	696.729	770.704	505.873	427.794	846.074	479.668	450.561	845.267	401.093	372.129	873.627	432.782	266.047	829.208	431.436
97	0.96	529.335	1292.28	212.889	561.606	1285.66	146.126	563.449	1285.82	281.493	664.914	1111.71	63.0301	689.948	1113.19	361.579	593.348	1061.87	215.032	704.805	774.664	-91.1316	439.356	843.944	-114.326	443.933	848.646	-36.8145	358.457	864.828	-69.4323	263.604	834.222	-68.4155	696.713	770.691	505.878	427.814	846.067	479.649	450.595	845.239	401.099	372.148	873.609	432.769	266.112	829.194	431.409
98	0.97	529.277	1292.31	212.901	561.557	1285.68	146.143	563.444	1285.82	281.493	664.92	1111.71	63.0201	689.917	1113.19	361.552	593.351	1061.88	215.013	704.797	774.66	-91.1454	439.333	843.941	-114.339	443.932	848.647	-36.8135	358.407	864.836	-69.4241	263.628	834.208	-68.4368	696.708	770.689	505.873	427.817	846.054	479.644	450.607	845.238	401.087	372.151	873.587	432.756	266.147	829.204	431.404
99	0.98	529.309	1292.34	212.937	561.493	1285.69	146.197	563.462	1285.84	281.524	664.944	1111.71	63.0288	689.929	1113.2	361.572	593.399	1061.87	215.053	704.836	774.695	-91.1305	439.349	843.929	-114.303	443.946	848.65	-36.787	358.423	864.853	-69.402	263.616	834.212	-68.4147	696.725	770.702	505.875	427.812	846.042	479.657	450.601	845.265	401.096	372.15	873.58	432.754	266.093	829.216	431.418
100	0.99	529.33	1292.32	212.958	561.493	1285.69	146.232	563.452	1285.83	281.549	664.941	1111.71	63.0498	689.937	1113.19	361.588	593.391	1061.86	215.089	704.833	774.674	-91.133	439.335	843.926	-114.279	443.924	848.648	-36.7528	358.422	864.851	-69.3742	263.634	834.225	-68.4005	696.742	770.712	505.886	427.813	846.039	479.689	450.576	845.292	401.118	372.164	873.57	432.757	266.032	829.211	431.44
101	1	529.287	1292.24	212.947	561.475	1285.67	146.221	563.453	1285.8	281.557	664.927	1111.7	63.0475	689.895	1113.17	361.576	593.374	1061.84	215.086	704.825	774.657	-91.1549	439.297	843.927	-114.291	443.89	848.624	-36.7473	358.397	864.837	-69.379	263.642	834.206	-68.4069	696.739	770.708	505.893	427.793	846.035	479.676	450.543	845.294	401.105	372.137	873.566	432.759	265.966	829.17	431.469
102	1.01	529.323	1292.22	212.922	561.502	1285.66	146.172	563.452	1285.78	281.534	664.912	1111.69	63.0292	689.908	1113.16	361.567	593.422	1061.8	215.054	704.842	774.696	-91.1626	439.332	843.918	-114.308	443.91	848.604	-36.7815	358.408	864.824	-69.4026	263.658	834.189	-68.4189	696.743	770.697	505.894	427.78	846.037	479.663	450.582	845.279	401.085	372.096	873.559	432.754	266.043	829.098	431.466
103	1.02	529.38	1292.21	212.913	561.52	1285.65	146.168	563.472	1285.75	281.532	664.905	1111.69	63.0333	689.943	1113.15	361.556	593.459	1061.77	215.055	704.831	774.707	-91.1629	439.321	843.924	-114.315	443.923	848.603	-36.7876	358.43	864.815	-69.3957	263.632	834.207	-68.3936	696.712	770.699	505.899	427.784	846.049	479.679	450.574	845.271	401.081	372.116	873.561	432.757	266.119	829.104	431.449
104	1.03	529.317	1292.23	212.919	561.545	1285.64	146.185	563.451	1285.76	281.536	664.911	1111.7	63.0303	689.942	1113.17	361.559	593.423	1061.79	215.049	704.847	774.708	-91.1279	439.314	843.928	-114.308	443.922	848.626	-36.7833	358.424	864.829	-69.39	263.637	834.227	-68.4003	696.728	770.708	505.891	427.785	846.054	479.664	450.531	845.269	401.087	372.115	873.583	432.767	266.131	829.142	431.45
105	1.04	529.302	1292.23	212.921	561.481	1285.65	146.185	563.406	1285.78	281.518	664.886	1111.71	63.0144	689.919	1113.19	361.559	593.393	1061.85	215.022	704.84	774.714	-91.1106	439.32	843.94	-114.336	443.919	848.651	-36.7958	358.413	864.855	-69.4229	263.629	834.238	-68.4225	696.715	770.718	505.871	427.78	846.075	479.64	450.536	845.271	401.078	372.129	873.619	432.759	266.128	829.18	431.439
106	1.05	529.282	1292.24	212.884	561.483	1285.66	146.172	563.408	1285.78	281.509	664.878	1111.72	63.0007	689.888	1113.2	361.537	593.351	1061.88	214.995	704.826	774.706	-91.1236	439.311	843.966	-114.338	443.919	848.656	-36.8171	358.425	864.87	-69.4595	263.642	834.247	-68.4407	696.703	770.721	505.875	427.768	846.087	479.62	450.532	845.271	401.065	372.154	873.631	432.745	266.149	829.171	431.407
107	1.06	529.277	1292.27	212.902	561.492	1285.66	146.183	563.39	1285.77	281.535	664.913	1111.73	63.027	689.917	1113.21	361.549	593.374	1061.89	215.016	704.814	774.687	-91.1371	439.366	843.96	-114.332	443.972	848.651	-36.8111	358.456	864.871	-69.4417	263.684	834.224	-68.3972	696.71	770.71	505.877	427.789	846.09	479.631	450.535	845.278	401.077	372.134	873.622	432.746	266.091	829.211	431.448
108	1.07	529.271	1292.25	212.934	561.443	1285.65	146.232	563.388	1285.77	281.573	664.929	1111.74	63.0511	689.918	1113.2	361.562	593.38	1061.91	215.052	704.827	774.683	-91.1236	439.358	843.952	-114.309	443.973	848.662	-36.7758	358.439	864.861	-69.41	263.658	834.219	-68.3379	696.718	770.698	505.885	427.798	846.074	479.65	450.572	845.292	401.109	372.114	873.608	432.753	266.017	829.241	431.493
109	1.08	529.304	1292.22	212.947	561.403	1285.64	146.251	563.383	1285.76	281.577	664.914	1111.73	63.0456	689.886	1113.17	361.549	593.36	1061.88	215.059	704.806	774.68	-91.1351	439.337	843.935	-114.294	443.902	848.645	-36.7544	358.421	864.842	-69.398	263.675	834.214	-68.3634	696.712	770.701	505.889	427.766	846.054	479.655	450.592	845.281	401.117	372.089	873.597	432.757	265.976	829.209	431.492
110	1.09	529.308	1292.2	212.946	561.401	1285.61	146.256	563.395	1285.75	281.575	664.921	1111.72	63.0315	689.912	1113.15	361.548	593.406	1061.82	215.069	704.781	774.675	-91.1601	439.332	843.925	-114.313	443.903	848.628	-36.77	358.416	864.818	-69.402	263.625	834.232	-68.3685	696.716	770.697	505.89	427.764	846.036	479.655	450.562	845.285	401.103	372.063	873.59	432.763	266.026	829.163	431.478
111	1.1	529.281	1292.18	212.956	561.427	1285.58	146.262	563.404	1285.74	281.589	664.918	1111.72	63.0447	689.935	1113.16	361.562	593.467	1061.77	215.078	704.756	774.666	-91.1485	439.327	843.922	-114.302	443.934	848.611	-36.7717	358.432	864.803	-69.3911	263.616	834.23	-68.3462	696.715	770.696	505.878	427.754	846.042	479.663	450.543	845.287	401.099	372.062	873.594	432.776	266.117	829.115	431.452
112	1.11	529.313	1292.14	212.968	561.398	1285.57	146.278	563.392	1285.73	281.594	664.907	1111.71	63.0528	689.936	1113.16	361.581	593.489	1061.75	215.065	704.796	774.686	-91.1224	439.297	843.921	-114.297	443.961	848.601	-36.7794	358.442	864.811	-69.3894	263.602	834.224	-68.3003	696.716	770.689	505.88	427.758	846.047	479.675	450.543	845.275	401.09	372.086	873.602	432.78	266.076	829.141	431.462
113	1.12	529.327	1292.17	212.965	561.37	1285.59	146.267	563.381	1285.74	281.562	664.911	1111.71	63.0381	689.948	1113.17	361.58	593.472	1061.75	215.061	704.803	774.67	-91.1517	439.284	843.912	-114.298	443.946	848.605	-36.7839	358.438	864.81	-69.4065	263.619	834.235	-68.3371	696.715	770.687	505.872	427.776	846.049	479.665	450.506	845.276	401.073	372.118	873.611	432.773	266.035	829.194	431.47
114	1.13	529.292	1292.18	212.933	561.423	1285.6	146.221	563.413	1285.73	281.547	664.908	1111.71	63.0217	689.969	1113.17	361.555	593.475	1061.75	215.034	704.762	774.669	-91.1623	439.316	843.9	-114.344	443.932	848.607	-36.8128	358.443	864.802	-69.4428	263.689	834.236	-68.4317	696.732	770.692	505.861	427.765	846.052	479.648	450.509	845.259	401.043	372.152	873.595	432.751	266.191	829.137	431.416
115	1.14	529.334	1292.23	212.93	561.448	1285.62	146.218	563.438	1285.75	281.539	664.917	1111.71	63.0107	690.011	1113.2	361.547	593.461	1061.78	215.013	704.803	774.665	-91.1436	439.345	843.927	-114.346	443.979	848.617	-36.8349	358.458	864.824	-69.4534	263.729	834.242	-68.4678	696.751	770.689	505.858	427.78	846.064	479.64	450.528	845.262	401.027	372.155	873.584	432.742	266.218	829.147	431.406
116	1.15	529.261	1292.3	212.929	561.439	1285.68	146.229	563.396	1285.8	281.565	664.925	1111.73	63.0173	690.01	1113.22	361.557	593.388	1061.86	215.031	704.872	774.697	-91.1417	439.361	843.948	-114.317	443.968	848.656	-36.8014	358.417	864.86	-69.4209	263.722	834.224	-68.4664	696.761	770.694	505.869	427.802	846.083	479.646	450.56	845.297	401.07	372.165	873.597	432.741	266.064	829.208	431.433
117	1.16	529.129	1292.36	212.976	561.42	1285.71	146.233	563.361	1285.85	281.588	664.914	1111.73	63.028	689.963	1113.21	361.576	593.282	1061.94	215.068	704.848	774.696	-91.1462	439.325	843.96	-114.292	443.907	848.689	-36.7523	358.392	864.876	-69.381	263.68	834.213	-68.4308	696.74	770.696	505.861	427.791	846.087	479.655	450.578	845.326	401.125	372.157	873.599	432.738	266.041	829.215	431.443
118	1.17	529.087	1292.4	213.019	561.368	1285.71	146.269	563.386	1285.86	281.594	664.893	1111.72	63.0412	689.959	1113.21	361.571	593.265	1061.95	215.095	704.809	774.68	-91.1412	439.297	843.976	-114.28	443.894	848.685	-36.753	358.374	864.901	-69.3741	263.652	834.233	-68.418	696.719	770.705	505.876	427.783	846.07	479.654	450.558	845.335	401.131	372.141	873.59	432.749	266.104	829.19	431.412
119	1.18	529.247	1292.32	212.987	561.411	1285.69	146.255	563.419	1285.86	281.573	664.878	1111.71	63.0492	689.936	1113.21	361.571	593.335	1061.88	215.083	704.805	774.694	-91.1615	439.289	843.97	-114.268	443.924	848.653	-36.78	358.39	864.874	-69.3922	263.6	834.244	-68.3882	696.704	770.71	505.899	427.781	846.059	479.654	450.573	845.302	401.107	372.115	873.591	432.762	266.075	829.154	431.434
120	1.19	529.358	1292.26	212.942	561.511	1285.66	146.215	563.485	1285.81	281.546	664.884	1111.7	63.0443	689.922	1113.2	361.566	593.379	1061.81	215.063	704.853	774.717	-91.1654	439.312	843.947	-114.284	443.953	848.631	-36.7845	358.411	864.837	-69.4103	263.593	834.257	-68.3617	696.719	770.728	505.907	427.79	846.057	479.659	450.591	845.251	401.074	372.114	873.601	432.761	266.11	829.157	431.448
121	1.2	529.353	1292.27	212.927	561.541	1285.63	146.204	563.548	1285.77	281.537	664.872	1111.69	63.0534	689.914	1113.19	361.568	593.431	1061.74	215.061	704.822	774.706	-91.1343	439.315	843.912	-114.3	443.987	848.613	-36.7956	358.445	864.817	-69.4237	263.604	834.243	-68.3338	696.718	770.741	505.917	427.783	846.054	479.672	450.603	845.228	401.068	372.129	873.612	432.765	266.102	829.147	431.441
122	1.21	529.377	1292.27	212.929	561.547	1285.62	146.175	563.537	1285.79	281.498	664.853	1111.68	63.0499	689.911	1113.19	361.572	593.441	1061.73	215.05	704.77	774.665	-91.1348	439.327	843.902	-114.314	443.983	848.609	-36.8148	358.456	864.801	-69.4422	263.624	834.216	-68.3554	696.688	770.732	505.916	427.778	846.054	479.67	450.596	845.224	401.062	372.108	873.626	432.776	266.049	829.184	431.441
123	1.22	529.416	1292.33	212.915	561.555	1285.66	146.156	563.51	1285.82	281.492	664.844	1111.68	63.0437	689.94	1113.19	361.567	593.409	1061.76	215.037	704.748	774.667	-91.1201	439.319	843.921	-114.327	443.971	848.62	-36.8167	358.47	864.81	-69.4647	263.666	834.208	-68.3775	696.669	770.715	505.908	427.771	846.06	479.66	450.586	845.229	401.057	372.126	873.624	432.766	266.1	829.2	431.423
124	1.23	529.29	1292.4	212.941	561.555	1285.68	146.187	563.474	1285.88	281.522	664.852	1111.69	63.049	689.95	1113.19	361.579	593.336	1061.81	215.058	704.786	774.669	-91.1106	439.336	843.926	-114.311	443.936	848.634	-36.7925	358.439	864.829	-69.4447	263.666	834.193	-68.3713	696.688	770.716	505.927	427.76	846.068	479.654	450.561	845.271	401.083	372.122	873.612	432.754	266.134	829.165	431.423
125	1.24	529.242	1292.41	212.976	561.511	1285.7	146.225	563.491	1285.93	281.567	664.867	1111.72	63.057	689.951	1113.2	361.591	593.289	1061.85	215.111	704.824	774.689	-91.1035	439.303	843.933	-114.279	443.878	848.668	-36.7396	358.419	864.862	-69.3987	263.669	834.189	-68.3781	696.699	770.717	505.953	427.762	846.071	479.665	450.553	845.318	401.118	372.137	873.603	432.758	266.054	829.18	431.462
126	1.25	529.309	1292.44	212.985	561.549	1285.71	146.201	563.479	1285.96	281.572	664.903	1111.72	63.0684	689.945	1113.19	361.598	593.301	1061.85	215.132	704.827	774.687	-91.0905	439.286	843.935	-114.273	443.876	848.672	-36.7328	358.425	864.865	-69.3813	263.673	834.188	-68.401	696.689	770.696	505.958	427.795	846.077	479.688	450.563	845.33	401.128	372.151	873.595	432.77	266.088	829.157	431.469
127	1.26	529.451	1292.4	212.926	561.61	1285.71	146.143	563.447	1285.94	281.551	664.905	1111.72	63.0553	689.927	1113.18	361.583	593.314	1061.84	215.103	704.828	774.681	-91.0754	439.332	843.94	-114.295	443.906	848.66	-36.7738	358.43	864.843	-69.3995	263.681	834.183	-68.3969	696.701	770.694	505.956	427.818	846.07	479.683	450.565	845.328	401.097	372.143	873.593	432.764	266.09	829.156	431.449
128	1.27	529.407	1292.38	212.888	561.644	1285.7	146.139	563.442	1285.92	281.515	664.919	1111.71	63.0412	689.938	1113.18	361.567	593.33	1061.82	215.071	704.881	774.69	-91.0823	439.356	843.933	-114.307	443.956	848.634	-36.8093	358.468	864.829	-69.4377	263.649	834.205	-68.3863	696.711	770.703	505.952	427.79	846.069	479.656	450.569	845.305	401.072	372.149	873.594	432.741	265.977	829.229	431.464
129	1.28	529.387	1292.37	212.908	561.635	1285.7	146.127	563.447	1285.91	281.507	664.934	1111.72	63.0288	689.985	1113.19	361.579	593.366	1061.82	215.066	704.898	774.703	-91.104	439.325	843.942	-114.313	443.996	848.631	-36.8017	358.475	864.829	-69.4424	263.66	834.199	-68.4193	696.722	770.731	505.944	427.791	846.07	479.655	450.555	845.303	401.076	372.188	873.611	432.743	265.963	829.274	431.485
130	1.29	529.376	1292.38	212.9	561.564	1285.71	146.14	563.47	1285.9	281.52	664.938	1111.72	63.0322	689.981	1113.2	361.567	593.359	1061.84	215.059	704.876	774.705	-91.1223	439.311	843.943	-114.312	443.982	848.647	-36.8014	358.456	864.844	-69.4472	263.696	834.2	-68.4529	696.715	770.743	505.939	427.79	846.087	479.659	450.549	845.309	401.092	372.185	873.616	432.744	266.009	829.28	431.478
131	1.3	529.34	1292.42	212.902	561.536	1285.72	146.161	563.493	1285.89	281.518	664.937	1111.71	63.0254	689.972	1113.19	361.545	593.357	1061.83	215.031	704.844	774.694	-91.1285	439.316	843.936	-114.336	443.955	848.659	-36.8158	358.405	864.86	-69.4661	263.703	834.236	-68.465	696.693	770.727	505.941	427.769	846.079	479.639	450.557	845.296	401.092	372.162	873.607	432.741	266.074	829.256	431.455
132	1.31	529.412	1292.4	212.882	561.582	1285.71	146.156	563.53	1285.87	281.494	664.952	1111.71	63.0139	689.977	1113.18	361.545	593.412	1061.78	214.999	704.862	774.695	-91.1489	439.313	843.926	-114.347	443.927	848.642	-36.8085	358.429	864.859	-69.4703	263.683	834.241	-68.47	696.714	770.721	505.929	427.78	846.072	479.637	450.579	845.276	401.083	372.131	873.592	432.73	266.061	829.24	431.451
133	1.32	529.465	1292.34	212.937	561.659	1285.7	146.158	563.597	1285.83	281.484	665.008	1111.7	63.0311	690.015	1113.17	361.545	593.476	1061.73	215.021	704.91	774.719	-91.1786	439.343	843.924	-114.336	443.958	848.625	-36.7993	358.477	864.826	-69.4492	263.671	834.223	-68.4635	696.729	770.717	505.937	427.819	846.05	479.659	450.608	845.264	401.097	372.145	873.587	432.737	266.141	829.179	431.438
134	1.33	529.515	1292.33	212.95	561.661	1285.68	146.186	563.616	1285.83	281.509	665.019	1111.7	63.0448	690.016	1113.16	361.552	593.463	1061.72	215.045	704.89	774.699	-91.178	439.335	843.937	-114.328	443.97	848.626	-36.7933	358.477	864.826	-69.4201	263.652	834.21	-68.4427	696.723	770.699	505.944	427.83	846.041	479.671	450.637	845.262	401.106	372.146	873.577	432.745	266.21	829.121	431.441
135	1.34	529.472	1292.35	212.945	561.635	1285.67	146.212	563.588	1285.86	281.539	665.013	1111.7	63.0381	690.007	1113.15	361.558	593.43	1061.77	215.051	704.896	774.692	-91.1757	439.331	843.946	-114.322	443.949	848.63	-36.7825	358.439	864.844	-69.4004	263.661	834.206	-68.4394	696.72	770.689	505.943	427.831	846.046	479.676	450.656	845.271	401.124	372.151	873.569	432.746	266.109	829.12	431.471
136	1.35	529.407	1292.4	212.944	561.629	1285.69	146.218	563.596	1285.88	281.544	665.017	1111.7	63.0307	690.002	1113.16	361.572	593.441	1061.8	215.056	704.904	774.717	-91.2104	439.349	843.935	-114.315	443.959	848.639	-36.7897	358.431	864.846	-69.3876	263.682	834.199	-68.4467	696.742	770.714	505.946	427.815	846.045	479.673	450.64	845.279	401.119	372.152	873.584	432.755	266.02	829.156	431.471
137	1.36	529.47	1292.4	212.941	561.666	1285.72	146.213	563.647	1285.88	281.53	665.018	1111.71	63.0271	690.04	1113.17	361.568	593.446	1061.81	215.067	704.923	774.745	-91.221	439.359	843.94	-114.316	443.969	848.637	-36.7941	358.456	864.847	-69.3893	263.739	834.206	-68.4694	696.748	770.723	505.918	427.824	846.059	479.666	450.639	845.287	401.106	372.165	873.608	432.764	266.061	829.214	431.495
138	1.37	529.469	1292.4	212.943	561.675	1285.75	146.201	563.664	1285.9	281.503	665.009	1111.73	63.0154	690.043	1113.2	361.55	593.429	1061.81	215.055	704.885	774.727	-91.2316	439.346	843.954	-114.324	443.98	848.65	-36.8072	358.427	864.865	-69.4193	263.762	834.212	-68.4762	696.738	770.718	505.895	427.83	846.083	479.667	450.627	845.279	401.096	372.167	873.633	432.766	266.108	829.261	431.489
139	1.38	529.459	1292.44	212.929	561.67	1285.77	146.19	563.642	1285.94	281.478	664.966	1111.74	62.9926	690.028	1113.2	361.541	593.375	1061.82	215.031	704.846	774.747	-91.2232	439.316	843.97	-114.339	443.962	848.671	-36.8227	358.411	864.871	-69.4435	263.708	834.213	-68.4751	696.731	770.714	505.871	427.793	846.105	479.654	450.575	845.303	401.079	372.134	873.65	432.764	266.018	829.305	431.467
140	1.39	529.518	1292.44	212.912	561.732	1285.77	146.154	563.617	1285.97	281.492	664.973	1111.74	62.9879	690.041	1113.19	361.546	593.387	1061.83	215.027	704.88	774.776	-91.2192	439.302	843.983	-114.343	443.943	848.676	-36.8184	358.445	864.868	-69.4449	263.681	834.241	-68.4761	696.742	770.719	505.867	427.797	846.109	479.652	450.545	845.309	401.076	372.116	873.644	432.756	266.097	829.258	431.415
141	1.4	529.575	1292.44	212.94	561.759	1285.76	146.145	563.648	1285.95	281.536	665	1111.73	62.999	690.084	1113.18	361.538	593.492	1061.78	215.022	704.884	774.754	-91.2032	439.317	843.962	-114.347	443.984	848.651	-36.8269	358.473	864.856	-69.4407	263.683	834.234	-68.4594	696.755	770.72	505.867	427.807	846.082	479.657	450.568	845.299	401.072	372.122	873.629	432.754	266.151	829.189	431.417
142	1.41	529.6	1292.42	212.966	561.774	1285.75	146.143	563.672	1285.95	281.533	664.989	1111.73	63.0195	690.092	1113.16	361.544	593.525	1061.76	215.03	704.861	774.733	-91.2043	439.334	843.937	-114.321	443.973	848.627	-36.8097	358.462	864.833	-69.4236	263.664	834.199	-68.4355	696.735	770.703	505.871	427.797	846.061	479.666	450.575	845.299	401.084	372.159	873.614	432.768	266.099	829.166	431.446
143	1.42	529.527	1292.45	212.988	561.757	1285.76	146.152	563.651	1285.96	281.529	664.927	1111.72	63.0195	690.065	1113.15	361.547	593.465	1061.79	215.056	704.832	774.728	-91.1832	439.322	843.922	-114.324	443.941	848.626	-36.8039	358.43	864.825	-69.4166	263.623	834.199	-68.4135	696.732	770.693	505.877	427.775	846.054	479.674	450.576	845.297	401.101	372.144	873.604	432.785	265.994	829.2	431.486
144	1.43	529.529	1292.47	212.997	561.78	1285.78	146.163	563.644	1285.97	281.527	664.93	1111.71	63.0206	690.063	1113.15	361.551	593.478	1061.8	215.063	704.844	774.718	-91.1801	439.321	843.927	-114.296	443.954	848.634	-36.8092	358.45	864.827	-69.4224	263.624	834.221	-68.3883	696.733	770.691	505.884	427.783	846.059	479.676	450.571	845.296	401.107	372.114	873.61	432.79	266.004	829.205	431.49
145	1.44	529.583	1292.51	212.994	561.828	1285.79	146.151	563.678	1285.98	281.537	664.956	1111.72	63.0273	690.058	1113.17	361.552	593.503	1061.82	215.059	704.819	774.701	-91.1817	439.3	843.93	-114.299	443.964	848.649	-36.7935	358.463	864.841	-69.4379	263.678	834.223	-68.3734	696.729	770.7	505.886	427.814	846.064	479.691	450.564	845.293	401.104	372.119	873.618	432.777	266.107	829.165	431.464
146	1.45	529.572	1292.56	212.978	561.825	1285.81	146.151	563.683	1286	281.525	664.934	1111.73	63.0203	690.055	1113.17	361.554	593.478	1061.83	215.045	704.827	774.697	-91.1581	439.334	843.934	-114.33	443.94	848.663	-36.7957	358.456	864.843	-69.4468	263.666	834.219	-68.3681	696.719	770.701	505.884	427.805	846.076	479.676	450.526	845.303	401.092	372.139	873.624	432.772	266.045	829.214	431.471
147	1.46	529.506	1292.58	212.972	561.814	1285.82	146.168	563.657	1286.04	281.511	664.903	1111.74	63.0135	690.033	1113.19	361.561	593.434	1061.85	215.043	704.808	774.686	-91.1234	439.334	843.942	-114.351	443.937	848.669	-36.7914	358.428	864.865	-69.4335	263.658	834.233	-68.3949	696.716	770.7	505.878	427.791	846.092	479.668	450.492	845.325	401.082	372.135	873.616	432.767	266	829.223	431.48
148	1.47	529.541	1292.56	212.993	561.779	1285.84	146.199	563.638	1286.08	281.549	664.893	1111.75	63.0182	690.039	1113.19	361.583	593.434	1061.86	215.066	704.779	774.696	-91.1221	439.309	843.968	-114.321	443.955	848.655	-36.7771	358.424	864.874	-69.3961	263.624	834.235	-68.3795	696.729	770.708	505.912	427.798	846.09	479.682	450.496	845.346	401.094	372.094	873.613	432.772	266.035	829.211	431.462
149	1.48	529.527	1292.57	213.004	561.748	1285.82	146.226	563.652	1286.1	281.564	664.876	1111.74	63.0409	690.02	1113.2	361.592	593.45	1061.86	215.098	704.809	774.719	-91.1333	439.324	843.962	-114.292	443.969	848.651	-36.7582	358.433	864.874	-69.3809	263.652	834.215	-68.398	696.749	770.713	505.927	427.789	846.095	479.692	450.47	845.38	401.084	372.076	873.622	432.781	266.061	829.173	431.468
150	1.49	529.514	1292.56	213	561.745	1285.79	146.209	563.602	1286.1	281.558	664.85	1111.73	63.0509	689.966	1113.17	361.579	593.399	1061.86	215.105	704.813	774.736	-91.1435	439.296	843.96	-114.273	443.934	848.659	-36.7477	358.409	864.881	-69.3806	263.698	834.191	-68.4311	696.726	770.7	505.917	427.76	846.09	479.682	450.459	845.382	401.089	372.07	873.615	432.777	266.073	829.139	431.446
151	1.5	529.528	1292.53	212.963	561.707	1285.79	146.18	563.581	1286.04	281.539	664.828	1111.72	63.0481	689.907	1113.16	361.563	593.38	1061.83	215.079	704.807	774.729	-91.1589	439.316	843.953	-114.293	443.934	848.662	-36.77	358.411	864.87	-69.4164	263.655	834.195	-68.4134	696.721	770.695	505.923	427.737	846.086	479.671	450.48	845.331	401.085	372.051	873.617	432.773	266.093	829.163	431.433
152	1.51	529.534	1292.5	212.962	561.695	1285.78	146.202	563.606	1285.98	281.534	664.847	1111.71	63.0444	689.957	1113.16	361.561	593.445	1061.79	215.065	704.84	774.734	-91.153	439.336	843.934	-114.32	443.977	848.643	-36.8055	358.436	864.857	-69.4351	263.682	834.21	-68.4203	696.702	770.685	505.924	427.771	846.077	479.664	450.509	845.294	401.061	372.093	873.62	432.771	266.158	829.184	431.447
153	1.52	529.58	1292.44	212.96	561.668	1285.77	146.237	563.597	1285.96	281.557	664.864	1111.73	63.047	689.972	1113.15	361.571	593.461	1061.78	215.075	704.875	774.752	-91.1575	439.339	843.919	-114.327	443.974	848.645	-36.794	358.447	864.858	-69.4427	263.669	834.23	-68.3927	696.707	770.696	505.923	427.816	846.076	479.665	450.56	845.258	401.064	372.147	873.626	432.774	266.126	829.221	431.437
154	1.53	529.533	1292.42	212.955	561.612	1285.77	146.263	563.552	1285.96	281.565	664.874	1111.73	63.0665	689.951	1113.16	361.592	593.404	1061.8	215.085	704.882	774.765	-91.1403	439.317	843.934	-114.308	443.944	848.646	-36.7879	358.442	864.857	-69.4321	263.629	834.231	-68.3504	696.712	770.689	505.919	427.836	846.081	479.657	450.612	845.238	401.096	372.155	873.627	432.773	265.984	829.276	431.477
155	1.54	529.438	1292.47	212.99	561.564	1285.77	146.272	563.52	1285.94	281.577	664.87	1111.73	63.0748	689.916	1113.15	361.599	593.379	1061.83	215.083	704.871	774.756	-91.1342	439.326	843.954	-114.307	443.951	848.665	-36.8039	358.419	864.86	-69.4249	263.632	834.225	-68.3765	696.704	770.677	505.905	427.83	846.076	479.666	450.646	845.252	401.126	372.159	873.611	432.771	265.999	829.271	431.48
156	1.55	529.402	1292.46	213.046	561.514	1285.76	146.288	563.573	1285.89	281.61	664.888	1111.73	63.0791	689.932	1113.15	361.604	593.375	1061.84	215.099	704.854	774.745	-91.1705	439.328	843.953	-114.311	443.948	848.677	-36.7988	358.413	864.86	-69.4107	263.641	834.221	-68.4033	696.71	770.67	505.897	427.835	846.055	479.663	450.663	845.261	401.142	372.185	873.596	432.763	266.132	829.188	431.443
157	1.56	529.276	1292.44	213.099	561.501	1285.72	146.338	563.571	1285.88	281.663	664.879	1111.73	63.0976	689.974	1113.15	361.63	593.365	1061.84	215.142	704.876	774.768	-91.1784	439.324	843.935	-114.292	443.949	848.666	-36.779	358.419	864.849	-69.4031	263.669	834.188	-68.4029	696.731	770.665	505.905	427.832	846.036	479.669	450.638	845.273	401.134	372.21	873.595	432.768	266.12	829.157	431.432
158	1.57	529.27	1292.41	213.087	561.477	1285.7	146.375	563.497	1285.87	281.689	664.861	1111.73	63.1142	689.96	1113.12	361.636	593.329	1061.85	215.163	704.895	774.782	-91.1752	439.321	843.916	-114.285	443.91	848.655	-36.754	358.421	864.845	-69.3899	263.664	834.169	-68.3766	696.736	770.657	505.916	427.81	846.04	479.673	450.607	845.301	401.134	372.175	873.589	432.771	266.045	829.164	431.452
159	1.58	529.312	1292.33	213.114	561.414	1285.69	146.409	563.404	1285.83	281.688	664.84	1111.73	63.1251	689.921	1113.1	361.648	593.399	1061.8	215.17	704.859	774.776	-91.1733	439.334	843.911	-114.291	443.948	848.621	-36.7722	358.422	864.839	-69.3816	263.633	834.17	-68.3654	696.722	770.648	505.926	427.805	846.046	479.684	450.618	845.307	401.143	372.122	873.582	432.786	265.915	829.207	431.498
160	1.59	529.305	1292.29	213.152	561.38	1285.66	146.428	563.407	1285.78	281.705	664.814	1111.73	63.1243	689.91	1113.1	361.639	593.453	1061.75	215.165	704.848	774.776	-91.1758	439.339	843.901	-114.295	443.953	848.599	-36.7931	358.46	864.81	-69.4026	263.649	834.159	-68.3774	696.712	770.648	505.946	427.827	846.036	479.698	450.611	845.282	401.117	372.123	873.588	432.791	266.019	829.193	431.463
161	1.6	529.309	1292.26	213.113	561.352	1285.64	146.426	563.426	1285.75	281.687	664.807	1111.73	63.1129	689.925	1113.1	361.62	593.426	1061.72	215.138	704.894	774.811	-91.1912	439.343	843.897	-114.323	443.939	848.611	-36.8051	358.466	864.811	-69.4456	263.653	834.21	-68.4127	696.737	770.652	505.931	427.804	846.04	479.675	450.52	845.281	401.054	372.142	873.606	432.778	266.108	829.176	431.438
162	1.61	529.275	1292.26	213.093	561.274	1285.66	146.443	563.399	1285.75	281.674	664.8	1111.75	63.1108	689.933	1113.12	361.619	593.37	1061.73	215.11	704.899	774.816	-91.1778	439.354	843.911	-114.364	443.968	848.635	-36.8238	358.447	864.821	-69.4668	263.649	834.239	-68.3988	696.751	770.648	505.909	427.782	846.059	479.649	450.519	845.296	401.04	372.108	873.62	432.762	266.077	829.225	431.443
163	1.62	529.203	1292.29	213.125	561.219	1285.66	146.477	563.377	1285.77	281.703	664.798	1111.77	63.1099	689.936	1113.12	361.629	593.358	1061.77	215.111	704.838	774.802	-91.1496	439.316	843.926	-114.339	443.965	848.655	-36.8281	358.442	864.835	-69.4656	263.623	834.237	-68.4116	696.706	770.628	505.885	427.782	846.078	479.665	450.553	845.304	401.077	372.106	873.634	432.774	266.055	829.247	431.469
164	1.63	529.143	1292.31	213.201	561.238	1285.67	146.507	563.345	1285.77	281.775	664.808	1111.76	63.1242	689.935	1113.13	361.657	593.38	1061.8	215.158	704.826	774.789	-91.1362	439.295	843.938	-114.303	443.941	848.679	-36.8069	358.409	864.869	-69.4194	263.668	834.213	-68.4216	696.691	770.63	505.875	427.808	846.096	479.692	450.558	845.318	401.114	372.139	873.652	432.801	266.108	829.232	431.468
165	1.64	529.101	1292.33	213.237	561.237	1285.67	146.527	563.312	1285.78	281.803	664.823	1111.75	63.1318	689.926	1113.14	361.677	593.358	1061.84	215.202	704.862	774.8	-91.1584	439.351	843.949	-114.306	443.939	848.692	-36.7731	358.369	864.892	-69.3873	263.676	834.201	-68.4015	696.709	770.637	505.884	427.798	846.092	479.69	450.558	845.339	401.133	372.146	873.641	432.802	266.118	829.203	431.459
166	1.65	529.157	1292.28	213.235	561.225	1285.64	146.549	563.319	1285.75	281.827	664.815	1111.75	63.1485	689.916	1113.14	361.711	593.369	1061.82	215.2	704.879	774.817	-91.151	439.355	843.95	-114.306	443.913	848.675	-36.7638	358.394	864.866	-69.3796	263.629	834.208	-68.3873	696.729	770.639	505.902	427.779	846.074	479.685	450.59	845.324	401.148	372.117	873.617	432.791	266.08	829.177	431.446
167	1.66	529.188	1292.24	213.244	561.243	1285.62	146.585	563.321	1285.72	281.844	664.794	1111.75	63.1786	689.892	1113.14	361.717	593.414	1061.77	215.207	704.851	774.825	-91.1385	439.361	843.93	-114.305	443.914	848.642	-36.7693	358.431	864.836	-69.3809	263.597	834.218	-68.3841	696.738	770.641	505.906	427.786	846.047	479.699	450.597	845.306	401.147	372.097	873.609	432.8	266.079	829.137	431.465
168	1.67	529.247	1292.21	213.296	561.247	1285.62	146.58	563.362	1285.69	281.83	664.766	1111.74	63.1876	689.931	1113.11	361.701	593.485	1061.72	215.213	704.838	774.821	-91.133	439.381	843.907	-114.303	443.949	848.609	-36.7684	358.451	864.818	-69.3885	263.565	834.242	-68.3562	696.722	770.632	505.902	427.81	846.025	479.711	450.594	845.275	401.134	372.118	873.603	432.821	266.053	829.167	431.499
169	1.68	529.306	1292.18	213.269	561.231	1285.62	146.582	563.4	1285.68	281.793	664.778	1111.73	63.1701	689.919	1113.1	361.682	593.517	1061.66	215.183	704.885	774.848	-91.136	439.358	843.892	-114.317	443.978	848.591	-36.7871	358.475	864.792	-69.4328	263.591	834.234	-68.3457	696.722	770.62	505.89	427.789	846.031	479.692	450.582	845.241	401.092	372.109	873.615	432.809	266.026	829.211	431.487
170	1.69	529.258	1292.22	213.24	561.229	1285.61	146.576	563.378	1285.71	281.781	664.768	1111.74	63.161	689.935	1113.1	361.671	593.479	1061.67	215.163	704.899	774.862	-91.132	439.325	843.91	-114.32	443.981	848.591	-36.8016	358.479	864.799	-69.4638	263.627	834.236	-68.3787	696.709	770.619	505.892	427.764	846.058	479.668	450.56	845.251	401.06	372.055	873.625	432.784	266.069	829.217	431.449
171	1.7	529.191	1292.29	213.273	561.237	1285.62	146.591	563.355	1285.75	281.797	664.758	1111.76	63.1693	689.925	1113.12	361.699	593.446	1061.72	215.177	704.855	774.831	-91.154	439.322	843.919	-114.327	443.971	848.625	-36.7999	358.458	864.821	-69.4545	263.71	834.229	-68.4622	696.738	770.623	505.904	427.772	846.074	479.666	450.52	845.281	401.068	372.104	873.631	432.771	266.094	829.203	431.45
172	1.71	529.175	1292.35	213.292	561.258	1285.65	146.606	563.341	1285.79	281.825	664.794	1111.76	63.1803	689.913	1113.12	361.704	593.428	1061.79	215.215	704.847	774.825	-91.1771	439.321	843.925	-114.325	443.959	848.652	-36.7876	358.449	864.838	-69.4153	263.71	834.199	-68.4761	696.759	770.62	505.896	427.802	846.07	479.671	450.527	845.32	401.092	372.15	873.637	432.785	266.188	829.167	431.437
173	1.72	529.126	1292.41	213.292	561.273	1285.67	146.593	563.363	1285.84	281.843	664.813	1111.77	63.1758	689.914	1113.12	361.718	593.376	1061.85	215.246	704.873	774.834	-91.1807	439.322	843.948	-114.304	443.939	848.666	-36.7699	358.401	864.859	-69.3769	263.666	834.22	-68.4501	696.755	770.605	505.889	427.798	846.062	479.67	450.575	845.341	401.125	372.166	873.62	432.783	266.196	829.135	431.431
174	1.73	529.176	1292.42	213.3	561.295	1285.71	146.605	563.374	1285.85	281.847	664.788	1111.76	63.173	689.907	1113.11	361.741	593.322	1061.88	215.244	704.906	774.848	-91.1555	439.314	843.966	-114.275	443.925	848.67	-36.7548	358.362	864.886	-69.3636	263.578	834.225	-68.3885	696.746	770.595	505.9	427.812	846.063	479.674	450.618	845.345	401.159	372.127	873.597	432.773	266.062	829.183	431.469
175	1.74	529.261	1292.38	213.295	561.306	1285.69	146.6	563.403	1285.82	281.839	664.805	1111.74	63.1962	689.892	1113.09	361.74	593.37	1061.85	215.257	704.887	774.851	-91.1439	439.352	843.947	-114.283	443.915	848.641	-36.746	358.385	864.866	-69.364	263.631	834.185	-68.4074	696.77	770.592	505.914	427.827	846.049	479.695	450.636	845.311	401.161	372.147	873.587	432.785	266.01	829.216	431.509
176	1.75	529.345	1292.33	213.277	561.338	1285.67	146.585	563.457	1285.77	281.828	664.818	1111.73	63.1832	689.925	1113.07	361.722	593.412	1061.78	215.228	704.891	774.845	-91.1606	439.379	843.921	-114.323	443.94	848.587	-36.7899	358.437	864.823	-69.3959	263.665	834.194	-68.44	696.761	770.577	505.913	427.829	846.027	479.694	450.631	845.261	401.13	372.195	873.586	432.782	266.046	829.209	431.503
177	1.76	529.39	1292.32	213.24	561.356	1285.68	146.569	563.474	1285.76	281.793	664.808	1111.74	63.1544	689.935	1113.06	361.691	593.454	1061.73	215.174	704.924	774.845	-91.1606	439.361	843.906	-114.352	443.93	848.584	-36.8141	358.469	864.793	-69.4567	263.679	834.199	-68.4898	696.728	770.583	505.904	427.81	846.026	479.657	450.623	845.221	401.111	372.182	873.591	432.771	266.039	829.21	431.447
178	1.77	529.323	1292.34	213.236	561.365	1285.69	146.553	563.437	1285.78	281.78	664.778	1111.75	63.148	689.919	1113.08	361.704	593.407	1061.73	215.166	704.895	774.834	-91.1354	439.348	843.906	-114.347	443.957	848.593	-36.8191	358.463	864.778	-69.4734	263.651	834.191	-68.46	696.722	770.588	505.916	427.811	846.035	479.651	450.591	845.227	401.103	372.154	873.583	432.763	266.012	829.241	431.436
179	1.78	529.312	1292.39	213.266	561.376	1285.71	146.553	563.408	1285.8	281.797	664.766	1111.75	63.1508	689.908	1113.1	361.718	593.41	1061.75	215.2	704.819	774.81	-91.147	439.351	843.915	-114.316	443.973	848.591	-36.8076	358.435	864.804	-69.4344	263.617	834.24	-68.3887	696.725	770.601	505.926	427.816	846.053	479.67	450.579	845.244	401.118	372.156	873.597	432.783	266.077	829.247	431.463
180	1.79	529.358	1292.41	213.291	561.385	1285.74	146.575	563.408	1285.83	281.812	664.781	1111.78	63.1719	689.906	1113.11	361.712	593.416	1061.79	215.217	704.796	774.839	-91.1559	439.345	843.929	-114.322	443.926	848.624	-36.7863	358.445	864.819	-69.4159	263.606	834.25	-68.3839	696.716	770.619	505.937	427.803	846.061	479.682	450.571	845.281	401.108	372.149	873.625	432.786	266.109	829.207	431.464
181	1.8	529.329	1292.44	213.302	561.404	1285.77	146.593	563.389	1285.87	281.833	664.78	1111.79	63.1809	689.905	1113.12	361.705	593.406	1061.84	215.226	704.832	774.877	-91.164	439.311	843.949	-114.311	443.897	848.662	-36.7769	358.421	864.856	-69.4043	263.642	834.21	-68.4235	696.674	770.625	505.935	427.781	846.065	479.692	450.541	845.335	401.098	372.096	873.624	432.78	266.15	829.148	431.418
182	1.81	529.291	1292.47	213.328	561.442	1285.77	146.611	563.452	1285.88	281.862	664.784	1111.79	63.1872	689.903	1113.13	361.727	593.384	1061.87	215.242	704.863	774.896	-91.1448	439.304	843.956	-114.276	443.904	848.669	-36.7615	358.403	864.864	-69.376	263.667	834.171	-68.4345	696.676	770.639	505.94	427.749	846.065	479.701	450.505	845.372	401.108	372.053	873.609	432.776	266.144	829.123	431.437
183	1.82	529.364	1292.48	213.343	561.452	1285.78	146.634	563.509	1285.91	281.883	664.811	1111.79	63.1915	689.914	1113.13	361.763	593.375	1061.89	215.276	704.863	774.884	-91.1497	439.313	843.951	-114.261	443.922	848.665	-36.7353	358.41	864.847	-69.3418	263.657	834.166	-68.4053	696.704	770.638	505.951	427.76	846.062	479.71	450.5	845.383	401.116	372.06	873.609	432.782	266.173	829.115	431.46
184	1.83	529.415	1292.46	213.339	561.454	1285.77	146.626	563.505	1285.91	281.891	664.806	1111.79	63.1881	689.947	1113.13	361.759	593.401	1061.88	215.278	704.845	774.87	-91.1554	439.276	843.961	-114.253	443.937	848.643	-36.7488	358.396	864.832	-69.3436	263.603	834.215	-68.3827	696.729	770.64	505.945	427.786	846.054	479.709	450.504	845.36	401.118	372.09	873.611	432.794	266.073	829.126	431.495
185	1.84	529.396	1292.43	213.303	561.464	1285.76	146.617	563.531	1285.87	281.847	664.8	1111.78	63.1674	689.966	1113.12	361.721	593.404	1061.85	215.234	704.843	774.864	-91.1277	439.277	843.959	-114.281	443.938	848.626	-36.7625	358.394	864.826	-69.376	263.561	834.228	-68.3785	696.712	770.629	505.927	427.781	846.057	479.691	450.527	845.311	401.127	372.09	873.616	432.791	265.972	829.205	431.526
186	1.85	529.456	1292.39	213.276	561.445	1285.75	146.6	563.562	1285.84	281.806	664.808	1111.77	63.15	689.956	1113.1	361.703	593.445	1061.8	215.193	704.878	774.854	-91.1218	439.292	843.926	-114.298	443.927	848.626	-36.7692	358.415	864.806	-69.4216	263.587	834.206	-68.4199	696.725	770.618	505.919	427.768	846.053	479.677	450.551	845.254	401.108	372.128	873.623	432.786	265.899	829.292	431.511
187	1.86	529.538	1292.36	213.258	561.515	1285.76	146.561	563.597	1285.82	281.791	664.842	1111.76	63.1347	689.986	1113.1	361.704	593.512	1061.78	215.187	704.893	774.848	-91.1388	439.315	843.905	-114.325	443.959	848.627	-36.8158	358.434	864.798	-69.4523	263.62	834.206	-68.4147	696.762	770.618	505.9	427.823	846.057	479.668	450.56	845.235	401.083	372.15	873.61	432.777	266.012	829.263	431.465
188	1.87	529.516	1292.42	213.251	561.519	1285.76	146.564	563.609	1285.82	281.807	664.839	1111.76	63.1359	689.998	1113.09	361.695	593.509	1061.8	215.19	704.847	774.821	-91.1333	439.309	843.917	-114.352	443.933	848.636	-36.8289	358.439	864.802	-69.4477	263.624	834.196	-68.4372	696.759	770.607	505.881	427.812	846.053	479.66	450.558	845.236	401.083	372.137	873.6	432.768	266.113	829.226	431.442
189	1.88	529.414	1292.49	213.286	561.48	1285.77	146.587	563.587	1285.86	281.82	664.831	1111.77	63.1435	689.977	1113.1	361.698	593.484	1061.83	215.181	704.832	774.809	-91.1589	439.282	843.94	-114.336	443.91	848.634	-36.8001	358.42	864.809	-69.4312	263.701	834.167	-68.4792	696.741	770.59	505.88	427.794	846.047	479.665	450.549	845.277	401.091	372.127	873.601	432.769	266.066	829.199	431.452
190	1.89	529.447	1292.48	213.328	561.522	1285.79	146.6	563.596	1285.9	281.856	664.852	1111.77	63.159	689.968	1113.11	361.72	593.462	1061.86	215.208	704.838	774.816	-91.1662	439.307	843.949	-114.305	443.922	848.639	-36.7588	358.412	864.824	-69.3952	263.689	834.181	-68.4629	696.747	770.576	505.88	427.819	846.049	479.68	450.59	845.301	401.121	372.154	873.588	432.767	266.04	829.148	431.455
191	1.9	529.534	1292.46	213.348	561.523	1285.8	146.66	563.632	1285.92	281.884	664.863	1111.77	63.1676	689.983	1113.1	361.727	593.455	1061.87	215.257	704.893	774.826	-91.1658	439.354	843.949	-114.277	443.911	848.638	-36.7313	358.428	864.83	-69.3647	263.64	834.159	-68.4312	696.76	770.562	505.889	427.821	846.057	479.709	450.616	845.32	401.135	372.158	873.574	432.773	266.037	829.148	431.479
192	1.91	529.476	1292.51	213.366	561.514	1285.8	146.667	563.614	1285.93	281.909	664.835	1111.77	63.1515	689.967	1113.09	361.722	593.421	1061.87	215.262	704.875	774.832	-91.1822	439.324	843.939	-114.263	443.899	848.635	-36.7353	358.41	864.826	-69.3675	263.635	834.171	-68.3936	696.743	770.557	505.901	427.813	846.055	479.713	450.587	845.325	401.134	372.124	873.579	432.778	266.058	829.139	431.463
193	1.92	529.38	1292.54	213.337	561.509	1285.78	146.626	563.604	1285.92	281.884	664.788	1111.77	63.1413	689.937	1113.1	361.721	593.392	1061.85	215.227	704.85	774.85	-91.1963	439.305	843.936	-114.281	443.892	848.625	-36.7629	358.374	864.825	-69.4058	263.67	834.177	-68.4363	696.744	770.578	505.891	427.786	846.05	479.69	450.541	845.317	401.105	372.091	873.581	432.773	266.077	829.136	431.44
194	1.93	529.416	1292.51	213.333	561.512	1285.78	146.608	563.633	1285.89	281.864	664.79	1111.77	63.1363	689.966	1113.1	361.702	593.471	1061.81	215.208	704.877	774.88	-91.1942	439.292	843.93	-114.274	443.922	848.612	-36.785	358.407	864.815	-69.4193	263.652	834.178	-68.4266	696.755	770.61	505.878	427.779	846.044	479.677	450.558	845.287	401.094	372.11	873.602	432.774	266.065	829.183	431.48
195	1.94	529.473	1292.48	213.372	561.591	1285.78	146.602	563.677	1285.88	281.867	664.796	1111.78	63.1468	689.976	1113.1	361.707	593.512	1061.78	215.224	704.907	774.888	-91.1791	439.304	843.925	-114.267	443.978	848.611	-36.7869	358.468	864.795	-69.4279	263.627	834.181	-68.3891	696.749	770.621	505.898	427.785	846.045	479.68	450.576	845.253	401.088	372.129	873.607	432.79	266.038	829.205	431.498
196	1.95	529.476	1292.46	213.389	561.586	1285.77	146.624	563.688	1285.85	281.88	664.787	1111.78	63.1578	689.975	1113.1	361.7	593.515	1061.77	215.233	704.856	774.86	-91.1741	439.312	843.922	-114.279	443.95	848.611	-36.7836	358.442	864.806	-69.422	263.621	834.197	-68.3765	696.715	770.609	505.913	427.78	846.045	479.688	450.574	845.249	401.096	372.114	873.622	432.804	266.061	829.197	431.482
197	1.96	529.502	1292.46	213.378	561.571	1285.78	146.631	563.675	1285.85	281.885	664.776	1111.79	63.152	689.988	1113.1	361.703	593.513	1061.78	215.205	704.852	774.876	-91.1927	439.332	843.92	-114.316	443.92	848.619	-36.7858	358.42	864.815	-69.4244	263.603	834.199	-68.3923	696.698	770.618	505.909	427.784	846.044	479.674	450.563	845.262	401.095	372.112	873.614	432.796	266.034	829.195	431.47
198	1.97	529.46	1292.47	213.37	561.579	1285.79	146.634	563.651	1285.88	281.885	664.775	1111.8	63.1404	689.967	1113.12	361.707	593.467	1061.82	215.175	704.873	774.914	-91.1905	439.329	843.924	-114.328	443.95	848.623	-36.7926	358.423	864.827	-69.4326	263.638	834.197	-68.4147	696.721	770.613	505.91	427.786	846.045	479.677	450.576	845.279	401.101	372.105	873.596	432.784	266.095	829.149	431.432
199	1.98	529.384	1292.57	213.391	561.552	1285.83	146.662	563.624	1285.91	281.895	664.757	1111.8	63.1423	689.952	1113.13	361.72	593.421	1061.87	215.187	704.883	774.929	-91.1861	439.308	843.95	-114.31	443.938	848.652	-36.775	358.398	864.846	-69.4048	263.642	834.203	-68.4161	696.724	770.607	505.925	427.781	846.052	479.683	450.582	845.288	401.13	372.092	873.599	432.786	266.088	829.175	431.45
200	1.99	529.283	1292.67	213.429	561.476	1285.87	146.706	563.591	1285.94	281.929	664.717	1111.82	63.1525	689.925	1113.13	361.748	593.34	1061.95	215.215	704.898	774.937	-91.1962	439.263	843.97	-114.256	443.888	848.68	-36.7568	358.36	864.865	-69.3796	263.59	834.209	-68.3893	696.682	770.597	505.918	427.758	846.058	479.673	450.569	845.312	401.149	372.106	873.609	432.786	266.056	829.188	431.459
201	2	529.277	1292.65	213.455	561.443	1285.88	146.725	563.601	1285.94	281.945	664.709	1111.83	63.1498	689.907	1113.13	361.751	593.326	1061.96	215.231	704.886	774.929	-91.186	439.243	843.974	-114.253	443.872	848.693	-36.7535	358.344	864.879	-69.3758	263.577	834.219	-68.3834	696.676	770.613	505.92	427.757	846.068	479.682	450.551	845.336	401.134	372.111	873.615	432.784	265.983	829.221	431.481
202	2.01	529.377	1292.59	213.444	561.473	1285.86	146.712	563.602	1285.91	281.932	664.712	1111.83	63.1528	689.926	1113.12	361.759	593.381	1061.9	215.23	704.869	774.952	-91.1935	439.258	843.971	-114.282	443.871	848.673	-36.7645	358.355	864.876	-69.3826	263.562	834.23	-68.3477	696.683	770.623	505.916	427.758	846.071	479.677	450.546	845.332	401.122	372.104	873.62	432.795	266	829.221	431.5
203	2.02	529.435	1292.52	213.44	561.491	1285.82	146.732	563.586	1285.89	281.927	664.734	1111.82	63.1687	689.937	1113.11	361.756	593.434	1061.85	215.234	704.877	774.954	-91.1936	439.281	843.945	-114.293	443.917	848.628	-36.7817	358.38	864.848	-69.3779	263.524	834.23	-68.332	696.72	770.607	505.923	427.762	846.064	479.687	450.51	845.317	401.105	372.082	873.622	432.787	265.99	829.23	431.511
204	2.03	529.512	1292.46	213.413	561.469	1285.8	146.744	563.595	1285.88	281.93	664.748	1111.81	63.1659	689.903	1113.08	361.757	593.478	1061.81	215.234	704.869	774.949	-91.2001	439.315	843.915	-114.293	443.933	848.61	-36.7906	358.407	864.808	-69.4038	263.563	834.211	-68.369	696.736	770.596	505.928	427.776	846.041	479.688	450.501	845.302	401.069	372.084	873.62	432.786	266.023	829.21	431.503
205	2.04	529.607	1292.45	213.42	561.5	1285.79	146.725	563.658	1285.87	281.938	664.742	1111.8	63.1559	689.895	1113.08	361.746	593.506	1061.79	215.235	704.851	774.938	-91.2159	439.288	843.91	-114.307	443.926	848.601	-36.802	358.429	864.773	-69.4302	263.613	834.185	-68.4074	696.712	770.58	505.929	427.774	846.018	479.674	450.493	845.276	401.043	372.104	873.595	432.786	266.104	829.145	431.488
206	2.05	529.576	1292.45	213.444	561.509	1285.79	146.722	563.61	1285.87	281.951	664.729	1111.81	63.1595	689.897	1113.08	361.757	593.446	1061.83	215.252	704.849	774.924	-91.2182	439.298	843.909	-114.316	443.893	848.609	-36.7826	358.378	864.795	-69.3945	263.607	834.185	-68.3932	696.698	770.571	505.919	427.759	846.02	479.669	450.522	845.273	401.072	372.1	873.595	432.779	266.079	829.113	431.475
207	2.06	529.364	1292.56	213.497	561.517	1285.82	146.75	563.603	1285.89	281.977	664.697	1111.82	63.1796	689.905	1113.11	361.779	593.332	1061.9	215.283	704.848	774.934	-91.1993	439.293	843.917	-114.296	443.867	848.619	-36.7452	358.339	864.811	-69.3428	263.643	834.169	-68.4121	696.722	770.572	505.911	427.755	846.023	479.675	450.543	845.294	401.12	372.094	873.586	432.77	266.069	829.11	431.461
208	2.07	529.367	1292.61	213.498	561.519	1285.87	146.774	563.66	1285.91	282.008	664.696	1111.84	63.1882	689.9	1113.13	361.789	593.331	1061.91	215.301	704.871	774.963	-91.198	439.301	843.929	-114.284	443.863	848.644	-36.7415	358.344	864.826	-69.3457	263.613	834.179	-68.4243	696.734	770.595	505.933	427.802	846.029	479.688	450.577	845.297	401.143	372.133	873.576	432.782	266.02	829.156	431.473
209	2.08	529.396	1292.62	213.5	561.504	1285.89	146.775	563.688	1285.9	282.02	664.698	1111.85	63.1786	689.892	1113.13	361.793	593.375	1061.9	215.295	704.874	774.988	-91.2156	439.287	843.935	-114.301	443.865	848.651	-36.7552	358.36	864.826	-69.3707	263.59	834.175	-68.4272	696.697	770.591	505.94	427.825	846.035	479.681	450.603	845.294	401.145	372.14	873.59	432.78	265.988	829.186	431.499
210	2.09	529.328	1292.65	213.55	561.497	1285.9	146.791	563.635	1285.9	282.013	664.699	1111.86	63.1815	689.886	1113.12	361.798	593.364	1061.91	215.285	704.901	775.013	-91.2201	439.25	843.948	-114.282	443.863	848.651	-36.7624	358.356	864.825	-69.3818	263.614	834.155	-68.4511	696.714	770.607	505.931	427.793	846.041	479.667	450.608	845.287	401.145	372.135	873.61	432.783	265.958	829.229	431.493
211	2.1	529.346	1292.63	213.579	561.503	1285.91	146.837	563.684	1285.88	282.03	664.715	1111.87	63.2038	689.904	1113.12	361.813	593.368	1061.92	215.289	704.969	775.045	-91.1942	439.264	843.961	-114.272	443.898	848.658	-36.7544	358.374	864.825	-69.3658	263.574	834.202	-68.4084	696.745	770.624	505.959	427.788	846.053	479.671	450.622	845.278	401.157	372.138	873.615	432.798	265.913	829.271	431.501
212	2.11	529.467	1292.59	213.588	561.527	1285.91	146.876	563.755	1285.87	282.047	664.739	1111.88	63.2122	689.927	1113.12	361.834	593.418	1061.9	215.313	704.951	775.03	-91.1806	439.29	843.94	-114.279	443.951	848.645	-36.7756	358.403	864.816	-69.3668	263.603	834.209	-68.408	696.709	770.606	505.971	427.803	846.055	479.697	450.628	845.274	401.139	372.16	873.623	432.814	265.955	829.278	431.501
213	2.12	529.577	1292.54	213.576	561.532	1285.91	146.873	563.764	1285.84	282.061	664.713	1111.88	63.2	689.925	1113.11	361.819	593.465	1061.87	215.306	704.867	774.996	-91.1903	439.312	843.904	-114.309	443.925	848.626	-36.7921	358.397	864.8	-69.3891	263.606	834.195	-68.4573	696.682	770.586	505.97	427.802	846.047	479.695	450.592	845.269	401.099	372.15	873.62	432.799	266.06	829.225	431.483
214	2.13	529.516	1292.54	213.56	561.556	1285.89	146.871	563.74	1285.85	282.05	664.69	1111.88	63.1908	689.918	1113.1	361.793	593.465	1061.86	215.259	704.853	775	-91.2098	439.262	843.912	-114.305	443.895	848.607	-36.792	358.371	864.795	-69.4153	263.599	834.184	-68.4552	696.691	770.596	505.967	427.773	846.036	479.66	450.551	845.261	401.067	372.098	873.607	432.767	266.024	829.202	431.45
215	2.14	529.446	1292.58	213.582	561.632	1285.87	146.879	563.767	1285.85	282.081	664.741	1111.88	63.2043	689.918	1113.11	361.824	593.479	1061.89	215.262	704.887	775.045	-91.1933	439.284	843.927	-114.294	443.886	848.601	-36.7733	358.376	864.8	-69.4142	263.635	834.173	-68.4433	696.707	770.595	505.979	427.762	846.032	479.661	450.536	845.27	401.081	372.101	873.591	432.761	265.999	829.183	431.426
216	2.15	529.443	1292.61	213.641	561.625	1285.9	146.917	563.822	1285.86	282.122	664.779	1111.88	63.219	689.939	1113.1	361.853	593.502	1061.92	215.297	704.888	775.064	-91.1656	439.301	843.919	-114.283	443.906	848.622	-36.7552	358.399	864.802	-69.3881	263.633	834.187	-68.425	696.691	770.582	505.985	427.791	846.021	479.687	450.552	845.287	401.109	372.118	873.597	432.784	266.06	829.146	431.463
217	2.16	529.446	1292.62	213.696	561.604	1285.94	146.938	563.839	1285.89	282.149	664.765	1111.89	63.2225	689.934	1113.09	361.853	593.48	1061.95	215.336	704.869	775.052	-91.1835	439.275	843.93	-114.259	443.869	848.645	-36.7361	358.373	864.82	-69.363	263.633	834.191	-68.4213	696.688	770.593	505.97	427.803	846.031	479.701	450.543	845.312	401.125	372.13	873.599	432.795	265.972	829.177	431.51
218	2.17	529.518	1292.64	213.695	561.566	1285.98	146.988	563.84	1285.93	282.159	664.767	1111.9	63.2027	689.936	1113.1	361.864	593.436	1061.99	215.339	704.885	775.054	-91.1808	439.295	843.936	-114.271	443.864	848.655	-36.731	358.345	864.832	-69.3491	263.591	834.175	-68.3922	696.722	770.599	505.974	427.785	846.05	479.683	450.546	845.32	401.14	372.122	873.597	432.786	265.925	829.196	431.513
219	2.18	529.487	1292.68	213.699	561.662	1285.99	147.003	563.87	1285.94	282.174	664.798	1111.91	63.2089	689.984	1113.1	361.876	593.473	1061.99	215.318	704.926	775.072	-91.1435	439.311	843.93	-114.271	443.917	848.653	-36.7413	358.367	864.836	-69.3525	263.614	834.186	-68.3804	696.75	770.613	505.99	427.773	846.057	479.68	450.546	845.328	401.128	372.115	873.599	432.775	265.997	829.197	431.478
220	2.19	529.576	1292.68	213.712	561.704	1285.99	146.986	563.94	1285.96	282.183	664.817	1111.91	63.2118	689.991	1113.11	361.877	593.501	1061.99	215.328	704.913	775.059	-91.14	439.316	843.945	-114.275	443.926	848.648	-36.754	358.374	864.836	-69.3627	263.666	834.2	-68.4304	696.755	770.617	505.995	427.801	846.054	479.694	450.533	845.324	401.11	372.137	873.593	432.774	266.089	829.18	431.451
221	2.2	529.619	1292.7	213.704	561.694	1286	146.966	563.997	1285.97	282.179	664.797	1111.92	63.2021	689.984	1113.11	361.86	593.468	1061.99	215.337	704.858	775.039	-91.1737	439.308	843.955	-114.304	443.889	848.649	-36.7755	358.354	864.833	-69.3834	263.648	834.199	-68.4623	696.716	770.606	505.973	427.787	846.037	479.677	450.526	845.303	401.104	372.132	873.607	432.768	266.207	829.111	431.416
222	2.21	529.581	1292.72	213.678	561.714	1286.02	146.951	564.016	1285.95	282.139	664.771	1111.91	63.1871	689.977	1113.1	361.838	593.432	1061.98	215.296	704.851	775.024	-91.1875	439.304	843.94	-114.315	443.9	848.629	-36.8071	358.362	864.803	-69.4118	263.668	834.185	-68.489	696.709	770.61	505.952	427.753	846.034	479.659	450.545	845.27	401.098	372.114	873.615	432.764	266.131	829.153	431.41
223	2.22	529.644	1292.73	213.649	561.797	1286.01	146.948	564.034	1285.96	282.115	664.771	1111.91	63.1934	690.026	1113.11	361.842	593.504	1061.96	215.278	704.872	775.039	-91.1642	439.304	843.912	-114.3	443.939	848.607	-36.8047	358.412	864.781	-69.4221	263.654	834.167	-68.4654	696.718	770.605	505.964	427.754	846.033	479.653	450.599	845.237	401.088	372.118	873.607	432.774	266.034	829.188	431.447
224	2.23	529.772	1292.71	213.629	561.841	1286.01	146.946	564.086	1285.99	282.128	664.79	1111.92	63.1975	690.036	1113.12	361.842	593.576	1061.97	215.302	704.863	775.066	-91.1716	439.29	843.898	-114.306	443.928	848.611	-36.7857	358.403	864.775	-69.4045	263.666	834.156	-68.4639	696.72	770.598	505.973	427.784	846.036	479.665	450.586	845.246	401.09	372.122	873.607	432.781	266.012	829.231	431.455
225	2.24	529.711	1292.77	213.654	561.812	1286.04	146.957	564.11	1286.02	282.131	664.785	1111.92	63.183	690.021	1113.13	361.837	593.533	1062.02	215.31	704.87	775.065	-91.2109	439.28	843.912	-114.315	443.883	848.629	-36.7781	358.359	864.794	-69.388	263.639	834.165	-68.4454	696.704	770.592	505.969	427.782	846.037	479.675	450.555	845.271	401.102	372.106	873.597	432.771	266.012	829.242	431.471
226	2.25	529.673	1292.8	213.65	561.847	1286.09	146.948	564.117	1286.08	282.119	664.802	1111.93	63.1769	690.032	1113.15	361.834	593.474	1062.07	215.304	704.914	775.09	-91.2345	439.316	843.932	-114.321	443.871	848.653	-36.7651	358.349	864.831	-69.3841	263.617	834.184	-68.4556	696.682	770.604	505.963	427.787	846.039	479.664	450.555	845.301	401.095	372.092	873.597	432.761	265.987	829.219	431.48
227	2.26	529.711	1292.81	213.657	561.897	1286.13	146.966	564.176	1286.13	282.147	664.84	1111.94	63.1916	690.062	1113.15	361.854	593.457	1062.12	215.342	704.939	775.085	-91.2318	439.306	843.949	-114.291	443.909	848.663	-36.7437	358.352	864.853	-69.3549	263.626	834.197	-68.4346	696.685	770.608	505.959	427.807	846.058	479.681	450.584	845.325	401.109	372.111	873.607	432.776	266.018	829.207	431.478
228	2.27	529.744	1292.81	213.689	561.933	1286.16	146.982	564.227	1286.17	282.191	664.839	1111.94	63.2149	690.103	1113.17	361.875	593.449	1062.15	215.394	704.94	775.097	-91.2435	439.266	843.976	-114.25	443.905	848.672	-36.7301	358.35	864.855	-69.3225	263.622	834.195	-68.4048	696.7	770.621	505.984	427.82	846.074	479.71	450.595	845.347	401.147	372.155	873.612	432.794	266.036	829.204	431.487
229	2.28	529.786	1292.84	213.69	561.957	1286.17	146.951	564.289	1286.21	282.174	664.807	1111.93	63.2152	690.095	1113.18	361.867	593.424	1062.16	215.396	704.9	775.093	-91.2679	439.24	843.968	-114.265	443.883	848.669	-36.7449	358.339	864.859	-69.3191	263.648	834.196	-68.4332	696.702	770.632	505.992	427.801	846.064	479.7	450.591	845.343	401.138	372.149	873.613	432.784	266.017	829.192	431.488
230	2.29	529.767	1292.88	213.63	561.984	1286.16	146.896	564.305	1286.21	282.125	664.797	1111.92	63.2036	690.06	1113.18	361.872	593.43	1062.12	215.343	704.887	775.084	-91.2623	439.27	843.938	-114.296	443.867	848.632	-36.7617	358.341	864.838	-69.3628	263.609	834.194	-68.4298	696.676	770.641	505.984	427.774	846.043	479.664	450.62	845.3	401.113	372.123	873.602	432.757	266.063	829.167	431.482
231	2.3	529.767	1292.87	213.606	562.032	1286.13	146.881	564.297	1286.19	282.101	664.787	1111.91	63.2071	690.023	1113.17	361.866	593.429	1062.08	215.332	704.917	775.088	-91.2375	439.293	843.926	-114.311	443.871	848.613	-36.7684	358.353	864.812	-69.3747	263.622	834.197	-68.418	696.69	770.655	506.002	427.749	846.021	479.653	450.596	845.271	401.101	372.123	873.584	432.761	266.077	829.135	431.462
232	2.31	529.782	1292.86	213.614	562.058	1286.11	146.893	564.298	1286.2	282.096	664.788	1111.91	63.215	689.992	1113.16	361.889	593.447	1062.03	215.363	704.953	775.116	-91.2173	439.297	843.913	-114.281	443.897	848.612	-36.7683	358.36	864.789	-69.3631	263.625	834.19	-68.3948	696.69	770.646	506.013	427.758	846.012	479.674	450.579	845.258	401.103	372.122	873.572	432.764	266.088	829.138	431.467
233	2.32	529.849	1292.85	213.592	562.072	1286.11	146.872	564.276	1286.2	282.087	664.779	1111.91	63.1935	689.986	1113.15	361.896	593.485	1062	215.353	704.941	775.116	-91.2169	439.279	843.922	-114.273	443.889	848.604	-36.7776	358.358	864.783	-69.3811	263.618	834.197	-68.4079	696.689	770.639	506.017	427.778	846.019	479.678	450.578	845.239	401.108	372.117	873.58	432.759	266.068	829.176	431.482
234	2.33	529.832	1292.87	213.556	562.099	1286.11	146.804	564.282	1286.19	282.072	664.754	1111.92	63.1757	689.946	1113.15	361.883	593.448	1062.01	215.313	704.902	775.083	-91.2091	439.264	843.935	-114.29	443.892	848.615	-36.7945	358.38	864.785	-69.4165	263.667	834.189	-68.4608	696.682	770.644	506.022	427.783	846.031	479.655	450.575	845.236	401.097	372.137	873.587	432.749	266.046	829.17	431.476
235	2.34	529.861	1292.89	213.495	562.085	1286.15	146.795	564.286	1286.23	282.063	664.759	1111.93	63.183	689.947	1113.15	361.861	593.434	1062.06	215.298	704.888	775.072	-91.1769	439.262	843.95	-114.287	443.898	848.63	-36.7869	358.38	864.804	-69.4078	263.695	834.173	-68.4868	696.638	770.634	506.054	427.769	846.058	479.66	450.591	845.257	401.11	372.156	873.595	432.753	266.024	829.206	431.449
236	2.35	529.8	1292.94	213.53	562.045	1286.2	146.837	564.303	1286.29	282.071	664.79	1111.94	63.1869	689.965	1113.19	361.868	593.377	1062.13	215.322	704.917	775.091	-91.1758	439.279	843.978	-114.293	443.91	848.67	-36.7521	358.373	864.848	-69.3661	263.677	834.169	-68.4758	696.666	770.659	506.074	427.774	846.076	479.671	450.592	845.307	401.134	372.144	873.601	432.748	266.083	829.2	431.444
237	2.36	529.712	1293.01	213.549	562.034	1286.21	146.841	564.262	1286.34	282.082	664.788	1111.95	63.1756	689.971	1113.23	361.887	593.306	1062.2	215.35	704.912	775.105	-91.2012	439.251	844.004	-114.279	443.86	848.714	-36.7256	358.343	864.89	-69.3423	263.634	834.189	-68.4557	696.644	770.684	506.091	427.774	846.094	479.677	450.548	845.362	401.14	372.142	873.619	432.748	266.117	829.169	431.434
238	2.37	529.69	1293.01	213.545	562.02	1286.2	146.83	564.23	1286.34	282.079	664.772	1111.95	63.1626	689.937	1113.23	361.881	593.301	1062.21	215.345	704.855	775.088	-91.2052	439.227	843.988	-114.269	443.832	848.717	-36.734	358.33	864.88	-69.3465	263.617	834.187	-68.442	696.604	770.687	506.104	427.748	846.087	479.674	450.539	845.385	401.136	372.11	873.606	432.738	266.038	829.195	431.443
239	2.38	529.746	1292.93	213.539	561.993	1286.19	146.831	564.204	1286.29	282.06	664.772	1111.94	63.159	689.916	1113.22	361.887	593.352	1062.17	215.33	704.848	775.083	-91.1789	439.295	843.961	-114.289	443.844	848.679	-36.7552	358.37	864.853	-69.3534	263.655	834.166	-68.4562	696.596	770.697	506.123	427.735	846.076	479.677	450.532	845.377	401.126	372.04	873.607	432.75	265.979	829.192	431.486
240	2.39	529.833	1292.86	213.523	562.04	1286.14	146.811	564.25	1286.22	282.033	664.808	1111.93	63.1632	689.932	1113.21	361.859	593.402	1062.1	215.312	704.884	775.077	-91.1504	439.325	843.935	-114.285	443.896	848.626	-36.7519	358.379	864.815	-69.3573	263.695	834.166	-68.4518	696.604	770.71	506.155	427.745	846.063	479.681	450.542	845.35	401.106	372.026	873.605	432.754	265.98	829.176	431.492
241	2.4	529.916	1292.79	213.481	562.054	1286.09	146.776	564.241	1286.16	282.01	664.815	1111.91	63.1484	689.933	1113.19	361.826	593.502	1062.01	215.29	704.876	775.069	-91.178	439.298	843.915	-114.288	443.916	848.602	-36.7634	358.386	864.781	-69.3736	263.7	834.15	-68.4653	696.606	770.727	506.159	427.745	846.054	479.676	450.53	845.316	401.081	372.057	873.599	432.745	266.03	829.144	431.482
242	2.41	529.899	1292.77	213.454	562.041	1286.08	146.752	564.22	1286.1	281.983	664.806	1111.92	63.1322	689.921	1113.19	361.805	593.508	1062	215.27	704.872	775.069	-91.2322	439.255	843.904	-114.298	443.902	848.605	-36.7719	358.401	864.767	-69.3953	263.645	834.145	-68.4551	696.585	770.722	506.158	427.737	846.049	479.661	450.523	845.277	401.073	372.079	873.603	432.748	266.084	829.145	431.453
243	2.42	529.822	1292.79	213.453	562.026	1286.07	146.742	564.186	1286.09	281.961	664.801	1111.92	63.1175	689.964	1113.21	361.805	593.449	1062.02	215.257	704.887	775.083	-91.233	439.267	843.913	-114.318	443.921	848.621	-36.787	358.398	864.773	-69.3818	263.624	834.191	-68.4295	696.592	770.731	506.17	427.741	846.057	479.652	450.536	845.259	401.08	372.095	873.611	432.742	265.999	829.213	431.502
244	2.43	529.78	1292.81	213.474	562.048	1286.06	146.734	564.233	1286.09	281.961	664.801	1111.93	63.1053	689.996	1113.22	361.812	593.478	1062.04	215.249	704.957	775.107	-91.2385	439.298	843.911	-114.3	443.939	848.639	-36.8021	358.415	864.799	-69.3648	263.632	834.209	-68.4023	696.611	770.761	506.166	427.757	846.063	479.651	450.575	845.259	401.099	372.113	873.61	432.747	265.918	829.264	431.533
245	2.44	529.721	1292.85	213.482	562.05	1286.08	146.71	564.21	1286.12	281.985	664.819	1111.95	63.0997	689.987	1113.25	361.8	593.437	1062.1	215.251	704.946	775.095	-91.2799	439.288	843.947	-114.286	443.918	848.673	-36.7863	358.38	864.827	-69.3539	263.637	834.222	-68.4048	696.609	770.759	506.144	427.778	846.07	479.658	450.594	845.279	401.111	372.127	873.614	432.752	265.94	829.25	431.52
246	2.45	529.705	1292.86	213.464	561.983	1286.11	146.714	564.189	1286.17	281.987	664.82	1111.94	63.0765	689.985	1113.27	361.79	593.379	1062.16	215.251	704.954	775.086	-91.3012	439.277	843.987	-114.308	443.869	848.723	-36.7633	358.312	864.87	-69.3717	263.657	834.2	-68.4425	696.609	770.759	506.137	427.783	846.075	479.656	450.586	845.328	401.118	372.121	873.609	432.74	266.063	829.198	431.464
247	2.46	529.688	1292.86	213.45	561.934	1286.13	146.718	564.177	1286.19	281.964	664.822	1111.95	63.0684	689.953	1113.27	361.779	593.341	1062.19	215.232	704.96	775.084	-91.284	439.265	843.994	-114.324	443.863	848.734	-36.7552	358.304	864.897	-69.367	263.616	834.199	-68.4135	696.61	770.765	506.119	427.766	846.074	479.643	450.607	845.339	401.13	372.111	873.604	432.725	266.076	829.197	431.441
248	2.47	529.712	1292.84	213.431	561.959	1286.1	146.694	564.179	1286.19	281.955	664.831	1111.95	63.0672	689.968	1113.27	361.785	593.349	1062.19	215.235	704.919	775.068	-91.2929	439.261	843.983	-114.302	443.875	848.707	-36.7652	358.341	864.886	-69.3591	263.597	834.21	-68.4001	696.635	770.757	506.108	427.771	846.086	479.647	450.624	845.333	401.141	372.124	873.595	432.721	265.978	829.241	431.491
249	2.48	529.73	1292.82	213.418	561.959	1286.08	146.678	564.19	1286.15	281.933	664.805	1111.95	63.0636	689.955	1113.29	361.783	593.419	1062.14	215.228	704.919	775.078	-91.3046	439.266	843.967	-114.303	443.89	848.685	-36.7848	358.359	864.859	-69.3652	263.598	834.202	-68.4061	696.632	770.746	506.1	427.781	846.083	479.656	450.605	845.32	401.124	372.136	873.612	432.73	265.967	829.249	431.504
250	2.49	529.797	1292.79	213.371	561.961	1286.08	146.645	564.218	1286.12	281.897	664.776	1111.95	63.0648	689.925	1113.28	361.768	593.483	1062.09	215.204	704.892	775.08	-91.3391	439.267	843.955	-114.314	443.879	848.663	-36.801	358.357	864.837	-69.3856	263.624	834.203	-68.4385	696.624	770.754	506.086	427.781	846.079	479.64	450.553	845.308	401.086	372.155	873.622	432.724	266.04	829.214	431.464
251	2.5	529.838	1292.76	213.344	561.985	1286.04	146.595	564.19	1286.11	281.849	664.782	1111.95	63.0533	689.921	1113.28	361.753	593.451	1062.06	215.179	704.897	775.081	-91.3508	439.24	843.956	-114.337	443.895	848.655	-36.8254	358.381	864.818	-69.4047	263.588	834.215	-68.4498	696.627	770.761	506.067	427.758	846.071	479.62	450.518	845.302	401.055	372.143	873.626	432.72	266.116	829.168	431.434
252	2.51	529.789	1292.79	213.367	561.984	1286.02	146.587	564.182	1286.13	281.843	664.789	1111.95	63.0526	689.899	1113.28	361.751	593.445	1062.06	215.177	704.952	775.097	-91.319	439.261	843.943	-114.322	443.928	848.64	-36.8133	358.423	864.808	-69.3962	263.609	834.197	-68.4268	696.642	770.775	506.072	427.727	846.072	479.631	450.535	845.296	401.077	372.106	873.616	432.735	266.078	829.171	431.468
253	2.52	529.775	1292.8	213.381	562.005	1286.05	146.595	564.218	1286.17	281.863	664.77	1111.96	63.0579	689.884	1113.29	361.759	593.459	1062.1	215.203	704.953	775.086	-91.3011	439.253	843.932	-114.312	443.927	848.643	-36.7869	358.415	864.817	-69.3757	263.642	834.205	-68.4284	696.649	770.787	506.094	427.739	846.073	479.651	450.52	845.299	401.095	372.123	873.61	432.748	266.085	829.187	431.48
254	2.53	529.832	1292.8	213.348	562.047	1286.07	146.578	564.204	1286.2	281.865	664.735	1111.97	63.0417	689.885	1113.32	361.771	593.412	1062.16	215.203	704.885	775.063	-91.3049	439.259	843.922	-114.323	443.902	848.657	-36.7772	358.368	864.838	-69.3589	263.622	834.199	-68.4494	696.628	770.78	506.099	427.737	846.082	479.654	450.517	845.318	401.101	372.119	873.612	432.745	266.114	829.17	431.459
255	2.54	529.779	1292.85	213.31	562.053	1286.09	146.551	564.173	1286.23	281.851	664.739	1111.96	63.0225	689.883	1113.32	361.758	593.347	1062.22	215.195	704.896	775.086	-91.2833	439.266	843.943	-114.327	443.883	848.662	-36.7724	358.327	864.846	-69.3671	263.604	834.192	-68.4502	696.624	770.794	506.099	427.708	846.083	479.638	450.54	845.326	401.111	372.088	873.618	432.735	266.044	829.165	431.446
256	2.55	529.732	1292.85	213.329	562.052	1286.13	146.565	564.174	1286.25	281.856	664.748	1111.97	63.0308	689.848	1113.32	361.774	593.304	1062.27	215.226	704.89	775.067	-91.2723	439.252	843.946	-114.297	443.879	848.672	-36.7608	358.324	864.857	-69.3453	263.604	834.181	-68.4307	696.631	770.805	506.117	427.718	846.077	479.656	450.54	845.332	401.129	372.054	873.618	432.738	265.926	829.181	431.479
257	2.56	529.793	1292.86	213.347	562.1	1286.13	146.547	564.184	1286.28	281.869	664.743	1111.97	63.0381	689.83	1113.33	361.776	593.368	1062.25	215.229	704.861	775.048	-91.2797	439.257	843.935	-114.285	443.867	848.658	-36.7464	358.338	864.849	-69.332	263.623	834.183	-68.4251	696.615	770.82	506.148	427.72	846.09	479.674	450.54	845.33	401.127	372.052	873.612	432.738	265.967	829.165	431.512
258	2.57	529.855	1292.85	213.319	562.121	1286.13	146.508	564.212	1286.25	281.846	664.722	1111.98	63.0124	689.815	1113.33	361.746	593.378	1062.21	215.203	704.814	775.041	-91.2807	439.252	843.928	-114.319	443.893	848.637	-36.7785	358.365	864.828	-69.3738	263.601	834.183	-68.4527	696.583	770.822	506.145	427.72	846.084	479.658	450.544	845.308	401.096	372.081	873.612	432.732	266.028	829.159	431.482
259	2.58	529.87	1292.82	213.257	562.128	1286.13	146.468	564.223	1286.23	281.782	664.694	1111.97	62.9986	689.794	1113.33	361.714	593.375	1062.2	215.145	704.795	775.021	-91.2833	439.251	843.933	-114.334	443.919	848.636	-36.8155	358.388	864.806	-69.4201	263.589	834.195	-68.4696	696.57	770.808	506.129	427.714	846.088	479.62	450.504	845.297	401.047	372.062	873.626	432.714	265.942	829.213	431.473
260	2.59	529.931	1292.82	213.26	562.149	1286.13	146.464	564.204	1286.24	281.773	664.72	1111.97	63.0105	689.795	1113.34	361.732	593.387	1062.19	215.153	704.836	775.022	-91.2597	439.289	843.912	-114.318	443.933	848.652	-36.817	358.408	864.807	-69.4132	263.639	834.192	-68.4541	696.59	770.813	506.145	427.721	846.096	479.614	450.523	845.297	401.043	372.076	873.633	432.719	265.95	829.232	431.469
261	2.6	529.87	1292.88	213.292	562.119	1286.15	146.501	564.215	1286.25	281.802	664.722	1111.99	63.0188	689.802	1113.36	361.745	593.391	1062.23	215.186	704.87	775.043	-91.245	439.274	843.94	-114.295	443.928	848.679	-36.7901	358.389	864.852	-69.3906	263.617	834.201	-68.4341	696.583	770.839	506.157	427.733	846.105	479.645	450.539	845.311	401.075	372.112	873.636	432.735	265.992	829.245	431.476
262	2.61	529.794	1292.91	213.276	562.081	1286.17	146.509	564.195	1286.29	281.814	664.682	1111.99	63.0157	689.792	1113.37	361.745	593.289	1062.29	215.194	704.91	775.069	-91.2715	439.236	843.968	-114.295	443.897	848.702	-36.7722	358.341	864.868	-69.3799	263.563	834.207	-68.4393	696.552	770.827	506.16	427.732	846.103	479.642	450.528	845.333	401.09	372.124	873.625	432.721	266.046	829.208	431.433
263	2.62	529.715	1292.94	213.266	562.043	1286.17	146.518	564.143	1286.3	281.819	664.659	1111.98	63.0032	689.746	1113.36	361.728	593.223	1062.33	215.184	704.929	775.089	-91.3058	439.216	843.983	-114.311	443.859	848.695	-36.771	358.305	864.861	-69.3725	263.611	834.185	-68.4584	696.545	770.813	506.166	427.73	846.083	479.612	450.544	845.333	401.091	372.079	873.597	432.693	266.098	829.171	431.38
264	2.63	529.739	1292.92	213.307	562.065	1286.15	146.55	564.222	1286.26	281.856	664.694	1111.98	63.0276	689.763	1113.35	361.771	593.294	1062.32	215.216	704.925	775.106	-91.2771	439.244	843.974	-114.287	443.857	848.677	-36.7561	358.311	864.864	-69.3439	263.589	834.178	-68.4016	696.575	770.822	506.195	427.716	846.075	479.624	450.592	845.322	401.124	372.08	873.579	432.712	266.064	829.144	431.424
265	2.64	529.715	1292.9	213.366	562.042	1286.12	146.585	564.286	1286.22	281.89	664.716	1111.98	63.0691	689.79	1113.34	361.813	593.369	1062.27	215.262	704.896	775.098	-91.2575	439.259	843.948	-114.252	443.888	848.663	-36.7214	358.332	864.85	-69.3003	263.558	834.185	-68.3566	696.594	770.829	506.223	427.746	846.057	479.666	450.626	845.302	401.153	372.112	873.573	432.731	265.929	829.139	431.518
266	2.65	529.745	1292.87	213.359	562.033	1286.11	146.605	564.259	1286.2	281.874	664.707	1111.98	63.0744	689.786	1113.32	361.814	593.375	1062.25	215.274	704.854	775.065	-91.2831	439.237	843.927	-114.248	443.878	848.645	-36.7325	358.343	864.821	-69.3122	263.56	834.19	-68.3651	696.606	770.833	506.219	427.763	846.036	479.669	450.623	845.272	401.141	372.136	873.565	432.721	265.947	829.135	431.522
267	2.66	529.842	1292.81	213.299	562.079	1286.1	146.547	564.211	1286.15	281.818	664.702	1111.99	63.0441	689.779	1113.3	361.777	593.342	1062.24	215.229	704.894	775.084	-91.2835	439.218	843.91	-114.279	443.902	848.619	-36.7795	358.35	864.788	-69.3798	263.62	834.169	-68.4372	696.588	770.813	506.198	427.729	846.037	479.634	450.585	845.235	401.088	372.148	873.561	432.698	265.987	829.147	431.456
268	2.67	529.949	1292.78	213.252	562.145	1286.07	146.498	564.227	1286.11	281.798	664.726	1111.99	63.031	689.815	1113.3	361.763	593.404	1062.21	215.163	704.932	775.122	-91.27	439.272	843.902	-114.345	443.966	848.604	-36.8285	358.39	864.773	-69.4272	263.614	834.189	-68.4577	696.571	770.8	506.212	427.737	846.05	479.612	450.558	845.206	401.043	372.141	873.58	432.698	266.037	829.15	431.445
269	2.68	529.887	1292.81	213.296	562.138	1286.08	146.534	564.234	1286.12	281.82	664.735	1112.01	63.0378	689.834	1113.33	361.795	593.404	1062.25	215.169	704.889	775.138	-91.3024	439.264	843.921	-114.332	443.949	848.655	-36.8232	358.386	864.797	-69.4212	263.624	834.199	-68.4145	696.546	770.789	506.216	427.765	846.068	479.626	450.566	845.237	401.066	372.119	873.597	432.702	266.032	829.201	431.47
270	2.69	529.713	1292.91	213.358	562.063	1286.14	146.605	564.18	1286.19	281.858	664.695	1112.04	63.0394	689.808	1113.36	361.825	593.317	1062.34	215.214	704.87	775.163	-91.3261	439.212	843.955	-114.291	443.846	848.701	-36.787	358.327	864.844	-69.3829	263.587	834.197	-68.394	696.55	770.801	506.201	427.738	846.088	479.626	450.56	845.302	401.105	372.124	873.606	432.692	265.947	829.247	431.472
271	2.7	529.664	1292.93	213.382	562.014	1286.17	146.635	564.122	1286.23	281.907	664.667	1112.05	63.0483	689.789	1113.37	361.82	593.257	1062.41	215.243	704.84	775.172	-91.3444	439.197	843.98	-114.288	443.814	848.727	-36.7748	358.306	864.869	-69.3641	263.554	834.21	-68.3954	696.526	770.798	506.194	427.707	846.106	479.628	450.544	845.349	401.132	372.107	873.606	432.696	265.911	829.245	431.47
272	2.71	529.684	1292.88	213.412	562.046	1286.17	146.657	564.159	1286.21	281.937	664.697	1112.04	63.0648	689.812	1113.37	361.844	593.299	1062.43	215.261	704.843	775.171	-91.3367	439.261	843.963	-114.284	443.847	848.723	-36.7731	358.355	864.863	-69.3655	263.609	834.2	-68.4451	696.524	770.804	506.215	427.732	846.111	479.647	450.579	845.362	401.149	372.066	873.608	432.717	265.927	829.217	431.472
273	2.72	529.743	1292.84	213.454	562.077	1286.16	146.702	564.231	1286.18	281.959	664.705	1112.04	63.0789	689.826	1113.37	361.859	593.308	1062.43	215.298	704.851	775.173	-91.3069	439.267	843.942	-114.27	443.864	848.697	-36.7696	358.365	864.851	-69.356	263.619	834.182	-68.4304	696.55	770.804	506.21	427.741	846.098	479.651	450.589	845.353	401.145	372.082	873.6	432.719	265.954	829.161	431.476
274	2.73	529.755	1292.83	213.458	562.069	1286.15	146.74	564.197	1286.17	281.977	664.705	1112.02	63.0845	689.812	1113.35	361.853	593.287	1062.4	215.312	704.863	775.184	-91.3076	439.243	843.934	-114.255	443.828	848.681	-36.7552	358.323	864.846	-69.34	263.577	834.179	-68.3883	696.573	770.799	506.198	427.714	846.081	479.641	450.583	845.335	401.138	372.108	873.589	432.711	265.921	829.167	431.461
275	2.74	529.752	1292.85	213.463	562.116	1286.14	146.745	564.202	1286.16	281.987	664.711	1112.02	63.0897	689.812	1113.34	361.862	593.299	1062.38	215.307	704.869	775.194	-91.3097	439.246	843.922	-114.267	443.831	848.658	-36.7589	358.325	864.828	-69.344	263.595	834.173	-68.3937	696.583	770.795	506.2	427.717	846.074	479.654	450.584	845.301	401.13	372.097	873.588	432.721	265.977	829.16	431.431
276	2.75	529.832	1292.82	213.442	562.18	1286.13	146.702	564.24	1286.11	281.986	664.723	1112.02	63.1075	689.859	1113.34	361.882	593.396	1062.32	215.298	704.866	775.208	-91.29	439.264	843.913	-114.294	443.899	848.627	-36.7808	358.355	864.794	-69.3741	263.615	834.177	-68.4222	696.567	770.782	506.214	427.738	846.069	479.673	450.554	845.267	401.093	372.092	873.596	432.735	266.043	829.155	431.456
277	2.76	529.865	1292.81	213.446	562.194	1286.11	146.708	564.288	1286.08	281.987	664.706	1112.03	63.0997	689.869	1113.32	361.876	593.456	1062.28	215.267	704.898	775.226	-91.2932	439.281	843.891	-114.321	443.88	848.611	-36.7904	358.391	864.768	-69.4062	263.618	834.159	-68.4537	696.56	770.783	506.204	427.749	846.053	479.654	450.559	845.246	401.068	372.107	873.593	432.721	266.044	829.171	431.444
278	2.77	529.864	1292.82	213.455	562.199	1286.13	146.721	564.312	1286.1	281.989	664.707	1112.03	63.09	689.867	1113.3	361.849	593.407	1062.3	215.255	704.926	775.248	-91.3058	439.282	843.874	-114.33	443.87	848.609	-36.8059	358.371	864.777	-69.4198	263.555	834.159	-68.4034	696.552	770.776	506.173	427.721	846.051	479.616	450.548	845.24	401.068	372.132	873.584	432.696	265.983	829.195	431.452
279	2.78	529.808	1292.87	213.478	562.228	1286.17	146.734	564.345	1286.13	282.016	664.736	1112.05	63.1003	689.865	1113.34	361.867	593.367	1062.36	215.277	704.891	775.237	-91.2908	439.271	843.886	-114.324	443.891	848.633	-36.8055	358.349	864.798	-69.401	263.559	834.185	-68.4012	696.565	770.8	506.187	427.71	846.053	479.621	450.549	845.264	401.081	372.098	873.587	432.695	265.999	829.16	431.445
280	2.79	529.828	1292.92	213.503	562.221	1286.22	146.79	564.348	1286.2	282.021	664.732	1112.06	63.1099	689.848	1113.37	361.89	593.295	1062.43	215.334	704.913	775.247	-91.2608	439.251	843.923	-114.316	443.891	848.659	-36.7773	358.325	864.841	-69.3523	263.593	834.177	-68.4074	696.582	770.802	506.209	427.719	846.058	479.642	450.566	845.301	401.118	372.087	873.587	432.716	266.012	829.144	431.457
281	2.8	529.804	1292.99	213.515	562.222	1286.27	146.796	564.329	1286.29	282.053	664.727	1112.06	63.1113	689.832	1113.38	361.914	593.282	1062.5	215.371	704.931	775.269	-91.2614	439.26	843.95	-114.288	443.873	848.693	-36.7506	358.315	864.866	-69.3335	263.575	834.174	-68.4117	696.596	770.801	506.206	427.721	846.067	479.644	450.589	845.33	401.149	372.111	873.593	432.718	265.931	829.183	431.494
282	2.81	529.851	1293	213.531	562.221	1286.31	146.803	564.363	1286.36	282.074	664.74	1112.07	63.1304	689.811	1113.39	361.937	593.255	1062.55	215.395	704.916	775.287	-91.2779	439.248	843.969	-114.258	443.851	848.731	-36.7375	358.313	864.87	-69.3152	263.589	834.195	-68.3865	696.588	770.802	506.21	427.736	846.081	479.648	450.601	845.363	401.163	372.111	873.599	432.711	265.915	829.173	431.5
283	2.82	529.924	1292.99	213.528	562.237	1286.33	146.81	564.379	1286.37	282.078	664.746	1112.07	63.1459	689.846	1113.41	361.934	593.249	1062.55	215.389	704.925	775.312	-91.2663	439.236	843.985	-114.26	443.846	848.729	-36.7285	358.307	864.86	-69.3234	263.635	834.19	-68.3844	696.594	770.812	506.227	427.731	846.094	479.654	450.539	845.383	401.133	372.104	873.598	432.712	265.944	829.172	431.49
284	2.83	529.975	1293.01	213.505	562.306	1286.33	146.768	564.427	1286.35	282.064	664.736	1112.08	63.1473	689.85	1113.4	361.923	593.29	1062.51	215.358	704.929	775.315	-91.2583	439.22	843.973	-114.276	443.883	848.691	-36.7546	358.336	864.844	-69.3473	263.652	834.21	-68.4116	696.575	770.814	506.241	427.713	846.091	479.64	450.537	845.343	401.114	372.104	873.604	432.714	266.05	829.19	431.446
285	2.84	529.969	1293.05	213.469	562.386	1286.33	146.721	564.478	1286.31	282.03	664.742	1112.09	63.1293	689.858	1113.37	361.915	593.325	1062.47	215.326	704.917	775.28	-91.2955	439.222	843.958	-114.301	443.91	848.657	-36.792	358.361	864.808	-69.3814	263.581	834.226	-68.3964	696.574	770.82	506.238	427.722	846.078	479.625	450.606	845.281	401.116	372.114	873.608	432.705	266.05	829.206	431.433
286	2.85	529.973	1293.03	213.49	562.45	1286.32	146.716	564.528	1286.28	282.011	664.754	1112.08	63.1178	689.86	1113.37	361.919	593.367	1062.42	215.322	704.911	775.283	-91.2918	439.21	843.933	-114.309	443.894	848.641	-36.7957	358.4	864.78	-69.3901	263.573	834.204	-68.4003	696.579	770.825	506.267	427.743	846.066	479.627	450.614	845.24	401.109	372.102	873.601	432.702	266.039	829.196	431.453
287	2.86	530.038	1293.01	213.508	562.503	1286.3	146.725	564.561	1286.28	282.024	664.763	1112.07	63.1283	689.882	1113.36	361.927	593.404	1062.4	215.35	704.901	775.291	-91.2769	439.234	843.899	-114.306	443.914	848.632	-36.7872	358.399	864.773	-69.3804	263.612	834.196	-68.4134	696.576	770.827	506.293	427.758	846.059	479.636	450.566	845.245	401.077	372.121	873.594	432.707	266.128	829.152	431.438
288	2.87	530.053	1293	213.497	562.516	1286.31	146.732	564.562	1286.31	282.04	664.776	1112.06	63.1425	689.86	1113.37	361.922	593.378	1062.42	215.345	704.906	775.274	-91.2643	439.237	843.913	-114.305	443.886	848.617	-36.7729	358.366	864.787	-69.3738	263.633	834.189	-68.4331	696.553	770.829	506.307	427.74	846.048	479.637	450.559	845.253	401.079	372.111	873.59	432.711	266.156	829.103	431.411
289	2.88	529.999	1293.06	213.496	562.474	1286.32	146.75	564.551	1286.34	282.052	664.748	1112.06	63.1377	689.837	1113.37	361.928	593.313	1062.49	215.359	704.861	775.277	-91.2617	439.218	843.927	-114.276	443.834	848.628	-36.7591	358.31	864.81	-69.3596	263.558	834.2	-68.3856	696.53	770.825	506.304	427.708	846.048	479.643	450.556	845.29	401.098	372.072	873.577	432.707	266.022	829.099	431.442
290	2.89	530.039	1293.08	213.526	562.476	1286.35	146.792	564.596	1286.4	282.082	664.755	1112.07	63.1462	689.824	1113.37	361.959	593.296	1062.53	215.404	704.829	775.29	-91.2634	439.21	843.946	-114.236	443.798	848.663	-36.7143	358.309	864.826	-69.316	263.547	834.173	-68.3358	696.542	770.839	506.329	427.714	846.055	479.668	450.555	845.344	401.139	372.065	873.589	432.718	265.985	829.109	431.486
291	2.9	530.072	1293.09	213.56	562.497	1286.37	146.809	564.595	1286.43	282.104	664.758	1112.09	63.1483	689.828	1113.41	361.966	593.346	1062.56	215.416	704.855	775.325	-91.2557	439.206	843.95	-114.244	443.847	848.675	-36.7202	358.326	864.834	-69.2986	263.599	834.167	-68.3661	696.553	770.855	506.351	427.73	846.067	479.68	450.548	845.364	401.149	372.079	873.596	432.721	266.01	829.126	431.503
292	2.91	530.073	1293.11	213.507	562.518	1286.4	146.762	564.558	1286.43	282.066	664.744	1112.11	63.1268	689.794	1113.42	361.932	593.334	1062.58	215.369	704.849	775.316	-91.2379	439.2	843.956	-114.29	443.872	848.68	-36.7691	358.321	864.838	-69.3436	263.613	834.181	-68.4217	696.527	770.864	506.336	427.695	846.082	479.657	450.503	845.365	401.119	372.073	873.608	432.722	265.969	829.156	431.461
293	2.92	530.089	1293.14	213.46	562.528	1286.43	146.723	564.545	1286.42	282.014	664.745	1112.12	63.0975	689.797	1113.45	361.938	593.309	1062.59	215.33	704.848	775.306	-91.2359	439.201	843.969	-114.295	443.847	848.691	-36.7788	358.315	864.841	-69.3675	263.605	834.179	-68.4246	696.55	770.891	506.32	427.687	846.101	479.637	450.492	845.364	401.115	372.052	873.625	432.71	265.923	829.196	431.433
294	2.93	530.092	1293.15	213.476	562.512	1286.44	146.725	564.56	1286.47	282.014	664.76	1112.13	63.1036	689.842	1113.46	361.945	593.342	1062.62	215.347	704.87	775.315	-91.2417	439.265	843.966	-114.3	443.852	848.697	-36.7578	358.324	864.836	-69.3515	263.568	834.199	-68.3906	696.58	770.899	506.323	427.718	846.118	479.646	450.501	845.365	401.114	372.071	873.635	432.704	265.969	829.21	431.473
295	2.94	530.066	1293.16	213.48	562.568	1286.42	146.723	564.551	1286.48	282.024	664.797	1112.12	63.1142	689.883	1113.45	361.935	593.374	1062.62	215.361	704.871	775.304	-91.2404	439.269	843.946	-114.3	443.851	848.69	-36.7416	358.352	864.832	-69.3596	263.578	834.209	-68.383	696.585	770.901	506.338	427.711	846.104	479.648	450.47	845.362	401.095	372.121	873.629	432.707	266.091	829.164	431.452
296	2.95	530.019	1293.15	213.46	562.605	1286.39	146.679	564.547	1286.44	281.989	664.779	1112.11	63.1005	689.872	1113.43	361.936	593.372	1062.59	215.328	704.84	775.293	-91.2509	439.262	843.936	-114.31	443.826	848.679	-36.7681	358.347	864.821	-69.3798	263.583	834.191	-68.4194	696.52	770.866	506.322	427.671	846.083	479.626	450.491	845.328	401.078	372.105	873.623	432.695	266.101	829.141	431.404
297	2.96	530.084	1293.1	213.436	562.612	1286.37	146.653	564.592	1286.4	281.967	664.757	1112.1	63.0922	689.847	1113.42	361.906	593.395	1062.54	215.305	704.814	775.281	-91.2387	439.269	843.917	-114.318	443.835	848.644	-36.7928	358.346	864.792	-69.404	263.582	834.16	-68.4318	696.504	770.857	506.319	427.659	846.06	479.617	450.553	845.294	401.082	372.081	873.609	432.693	265.965	829.164	431.434
298	2.97	530.241	1293.08	213.471	562.632	1286.35	146.689	564.689	1286.41	281.996	664.789	1112.1	63.1082	689.871	1113.43	361.92	593.453	1062.53	215.354	704.87	775.305	-91.2314	439.264	843.908	-114.293	443.878	848.628	-36.7655	358.391	864.776	-69.3666	263.582	834.176	-68.379	696.57	770.878	506.351	427.7	846.042	479.648	450.562	845.284	401.09	372.103	873.605	432.721	265.953	829.182	431.484
299	2.98	530.323	1293.07	213.479	562.628	1286.37	146.735	564.692	1286.43	282.017	664.797	1112.1	63.123	689.89	1113.43	361.949	593.442	1062.55	215.4	704.868	775.308	-91.2387	439.262	843.937	-114.265	443.887	848.631	-36.7266	358.384	864.802	-69.3114	263.555	834.204	-68.3499	696.599	770.888	506.368	427.725	846.055	479.68	450.559	845.305	401.118	372.11	873.6	432.736	265.989	829.169	431.488
300	2.99	530.152	1293.14	213.474	562.62	1286.39	146.692	564.626	1286.45	282.023	664.765	1112.1	63.1124	689.832	1113.44	361.947	593.358	1062.6	215.379	704.868	775.294	-91.2521	439.196	843.959	-114.269	443.868	848.663	-36.7226	358.317	864.837	-69.3223	263.562	834.202	-68.3838	696.543	770.872	506.339	427.697	846.071	479.655	450.568	845.313	401.121	372.098	873.594	432.714	265.939	829.176	431.486
301	3	530.07	1293.16	213.445	562.624	1286.41	146.659	564.578	1286.46	281.99	664.766	1112.11	63.0885	689.836	1113.44	361.932	593.298	1062.64	215.344	704.821	775.286	-91.2634	439.206	843.963	-114.282	443.842	848.672	-36.7366	358.317	864.834	-69.3492	263.57	834.178	-68.4031	696.523	770.881	506.317	427.686	846.082	479.64	450.592	845.322	401.113	372.073	873.607	432.705	265.936	829.197	431.481
302	3.01	530.117	1293.18	213.443	562.622	1286.44	146.666	564.578	1286.49	281.986	664.792	1112.11	63.081	689.841	1113.46	361.919	593.323	1062.66	215.349	704.834	775.302	-91.2847	439.236	843.95	-114.271	443.869	848.684	-36.7343	358.334	864.846	-69.3337	263.545	834.185	-68.3563	696.562	770.891	506.323	427.708	846.094	479.649	450.586	845.334	401.11	372.104	873.623	432.708	266.043	829.178	431.449
303	3.02	530.118	1293.22	213.452	562.601	1286.42	146.676	564.593	1286.5	281.981	664.801	1112.12	63.0913	689.839	1113.47	361.918	593.298	1062.68	215.356	704.877	775.336	-91.3065	439.203	843.935	-114.258	443.849	848.69	-36.7246	358.3	864.857	-69.3099	263.57	834.184	-68.3576	696.575	770.902	506.323	427.703	846.104	479.659	450.54	845.361	401.127	372.107	873.626	432.713	266.017	829.174	431.468
304	3.03	530.072	1293.2	213.428	562.582	1286.4	146.646	564.562	1286.48	281.953	664.774	1112.13	63.0776	689.802	1113.46	361.902	593.258	1062.69	215.344	704.833	775.331	-91.3076	439.18	843.924	-114.274	443.822	848.664	-36.7487	358.251	864.842	-69.3165	263.565	834.176	-68.401	696.546	770.9	506.294	427.663	846.097	479.626	450.479	845.351	401.107	372.064	873.628	432.699	265.947	829.204	431.472
305	3.04	530.104	1293.14	213.348	562.619	1286.4	146.58	564.534	1286.45	281.928	664.762	1112.11	63.0564	689.818	1113.43	361.87	593.27	1062.64	215.298	704.826	775.278	-91.3068	439.203	843.919	-114.303	443.864	848.641	-36.8063	358.308	864.803	-69.3699	263.574	834.173	-68.4333	696.526	770.887	506.282	427.666	846.072	479.587	450.521	845.305	401.072	372.046	873.599	432.669	265.988	829.167	431.436
306	3.05	530.127	1293.12	213.366	562.716	1286.4	146.561	564.626	1286.41	281.922	664.792	1112.1	63.069	689.824	1113.41	361.873	593.349	1062.61	215.296	704.872	775.271	-91.3139	439.22	843.919	-114.307	443.89	848.625	-36.8074	358.366	864.787	-69.3881	263.579	834.167	-68.4099	696.544	770.891	506.3	427.718	846.059	479.605	450.576	845.279	401.071	372.11	873.591	432.682	265.971	829.163	431.457
307	3.06	530.141	1293.14	213.389	562.676	1286.4	146.62	564.662	1286.42	281.93	664.811	1112.1	63.0787	689.842	1113.43	361.89	593.317	1062.63	215.35	704.878	775.277	-91.3006	439.207	843.924	-114.284	443.843	848.654	-36.7641	358.346	864.819	-69.3414	263.584	834.192	-68.3552	696.557	770.884	506.303	427.736	846.065	479.644	450.605	845.282	401.119	372.139	873.595	432.701	265.948	829.178	431.494
308	3.07	530.136	1293.18	213.381	562.606	1286.44	146.63	564.597	1286.44	281.932	664.783	1112.11	63.0666	689.838	1113.45	361.905	593.216	1062.69	215.337	704.874	775.274	-91.2955	439.226	843.93	-114.301	443.813	848.683	-36.7553	358.281	864.831	-69.3359	263.569	834.21	-68.3816	696.529	770.873	506.293	427.708	846.069	479.633	450.604	845.303	401.142	372.127	873.595	432.69	265.897	829.212	431.475
309	3.08	530.044	1293.19	213.345	562.626	1286.45	146.568	564.574	1286.47	281.902	664.761	1112.12	63.0504	689.85	1113.47	361.881	593.223	1062.7	215.286	704.847	775.271	-91.3184	439.215	843.93	-114.335	443.84	848.684	-36.7858	358.273	864.837	-69.3662	263.538	834.206	-68.4047	696.518	770.875	506.286	427.716	846.066	479.605	450.588	845.305	401.117	372.101	873.601	432.679	265.907	829.192	431.436
310	3.09	530.104	1293.16	213.33	562.654	1286.43	146.577	564.595	1286.49	281.91	664.783	1112.12	63.045	689.854	1113.47	361.879	593.29	1062.68	215.292	704.817	775.271	-91.3288	439.222	843.95	-114.31	443.876	848.674	-36.7887	358.339	864.825	-69.3741	263.613	834.17	-68.4237	696.554	770.895	506.309	427.732	846.082	479.626	450.588	845.308	401.104	372.119	873.61	432.687	265.951	829.18	431.437
311	3.1	530.109	1293.18	213.382	562.632	1286.43	146.623	564.604	1286.52	281.938	664.789	1112.13	63.0581	689.82	1113.48	361.912	593.279	1062.68	215.337	704.8	775.274	-91.2965	439.224	843.956	-114.278	443.877	848.678	-36.7593	358.343	864.821	-69.3367	263.575	834.179	-68.365	696.548	770.909	506.349	427.751	846.094	479.657	450.58	845.321	401.131	372.122	873.603	432.706	265.951	829.2	431.478
312	3.11	530.071	1293.18	213.401	562.618	1286.45	146.597	564.56	1286.52	281.925	664.751	1112.13	63.0573	689.784	1113.49	361.904	593.247	1062.7	215.328	704.782	775.265	-91.2928	439.221	843.955	-114.27	443.807	848.688	-36.7382	358.287	864.822	-69.3057	263.525	834.192	-68.3343	696.527	770.918	506.345	427.714	846.078	479.658	450.569	845.323	401.143	372.088	873.585	432.708	265.946	829.19	431.491
313	3.12	530.053	1293.16	213.369	562.641	1286.43	146.562	564.564	1286.48	281.889	664.742	1112.12	63.0478	689.777	1113.48	361.878	593.297	1062.66	215.296	704.82	775.3	-91.3232	439.201	843.953	-114.271	443.801	848.661	-36.7486	358.299	864.806	-69.3452	263.522	834.19	-68.3508	696.529	770.934	506.352	427.679	846.069	479.64	450.544	845.327	401.115	372.061	873.581	432.695	265.948	829.152	431.468
314	3.13	530.157	1293.14	213.33	562.693	1286.39	146.548	564.589	1286.48	281.867	664.757	1112.12	63.0547	689.806	1113.48	361.873	593.397	1062.59	215.284	704.837	775.319	-91.3227	439.232	843.929	-114.269	443.87	848.647	-36.7643	358.336	864.798	-69.3586	263.536	834.186	-68.3859	696.552	770.945	506.387	427.693	846.071	479.647	450.509	845.341	401.077	372.045	873.59	432.714	266.032	829.104	431.443
315	3.14	530.23	1293.13	213.31	562.698	1286.39	146.541	564.601	1286.51	281.88	664.754	1112.12	63.068	689.816	1113.48	361.878	593.386	1062.58	215.288	704.826	775.317	-91.2821	439.233	843.925	-114.273	443.922	848.658	-36.776	358.35	864.793	-69.3384	263.544	834.191	-68.3649	696.554	770.952	506.398	427.7	846.08	479.661	450.511	845.319	401.08	372.048	873.596	432.722	266.098	829.099	431.442
316	3.15	530.109	1293.18	213.319	562.696	1286.43	146.512	564.566	1286.51	281.863	664.72	1112.14	63.0498	689.794	1113.51	361.856	593.236	1062.66	215.278	704.811	775.31	-91.2858	439.2	843.949	-114.291	443.862	848.683	-36.7694	358.314	864.816	-69.3517	263.55	834.213	-68.3679	696.517	770.955	506.363	427.671	846.104	479.633	450.516	845.32	401.087	372.054	873.619	432.701	265.999	829.183	431.445
317	3.16	529.987	1293.24	213.308	562.667	1286.49	146.472	564.567	1286.52	281.829	664.716	1112.17	63.0187	689.775	1113.53	361.841	593.118	1062.71	215.261	704.792	775.312	-91.2932	439.209	843.955	-114.314	443.826	848.713	-36.7788	358.275	864.846	-69.374	263.557	834.214	-68.3908	696.487	770.944	506.314	427.664	846.118	479.601	450.555	845.317	401.114	372.058	873.647	432.683	265.952	829.255	431.443
318	3.17	530.008	1293.28	213.283	562.629	1286.5	146.474	564.566	1286.55	281.83	664.735	1112.17	63.0141	689.75	1113.54	361.854	593.128	1062.73	215.258	704.79	775.286	-91.2924	439.217	843.96	-114.317	443.818	848.723	-36.7781	358.292	864.866	-69.3588	263.571	834.206	-68.3945	696.517	770.958	506.327	427.675	846.122	479.608	450.591	845.319	401.13	372.083	873.641	432.687	265.982	829.277	431.456
319	3.18	530.023	1293.29	213.325	562.659	1286.48	146.487	564.583	1286.58	281.864	664.73	1112.18	63.034	689.764	1113.54	361.885	593.175	1062.72	215.289	704.794	775.295	-91.282	439.227	843.962	-114.284	443.814	848.737	-36.7546	358.306	864.865	-69.3404	263.64	834.174	-68.4025	696.549	770.967	506.359	427.698	846.119	479.635	450.582	845.333	401.136	372.109	873.632	432.705	266.021	829.251	431.465
320	3.19	530.035	1293.26	213.329	562.651	1286.46	146.51	564.574	1286.59	281.864	664.724	1112.16	63.0437	689.74	1113.52	361.884	593.185	1062.72	215.307	704.841	775.29	-91.2843	439.191	843.958	-114.255	443.786	848.729	-36.737	358.265	864.858	-69.3313	263.577	834.168	-68.3722	696.536	770.963	506.373	427.695	846.103	479.642	450.566	845.349	401.144	372.107	873.613	432.699	265.977	829.179	431.473
321	3.2	530.069	1293.25	213.303	562.686	1286.44	146.503	564.585	1286.55	281.855	664.737	1112.14	63.0348	689.753	1113.48	361.873	593.231	1062.66	215.302	704.847	775.284	-91.2991	439.187	843.93	-114.261	443.792	848.675	-36.7363	358.272	864.82	-69.3331	263.543	834.159	-68.3681	696.516	770.932	506.366	427.679	846.074	479.64	450.581	845.328	401.148	372.078	873.571	432.68	265.905	829.141	431.467
322	3.21	530.19	1293.16	213.292	562.787	1286.38	146.481	564.644	1286.47	281.851	664.748	1112.12	63.0413	689.796	1113.44	361.843	593.321	1062.58	215.289	704.828	775.276	-91.2943	439.228	843.903	-114.284	443.852	848.618	-36.7633	358.318	864.776	-69.3463	263.568	834.155	-68.3733	696.537	770.924	506.396	427.707	846.052	479.651	450.592	845.28	401.114	372.082	873.554	432.686	265.923	829.104	431.483
323	3.22	530.353	1293.02	213.277	562.863	1286.35	146.458	564.676	1286.41	281.85	664.781	1112.11	63.0464	689.819	1113.41	361.837	593.425	1062.51	215.279	704.852	775.272	-91.2943	439.257	843.873	-114.289	443.915	848.583	-36.785	358.402	864.723	-69.3723	263.566	834.156	-68.3555	696.577	770.941	506.419	427.737	846.04	479.656	450.572	845.248	401.065	372.151	873.551	432.702	266.005	829.068	431.495
324	3.23	530.213	1293.08	213.289	562.845	1286.38	146.455	564.639	1286.42	281.818	664.783	1112.11	63.033	689.822	1113.42	361.82	593.384	1062.55	215.251	704.846	775.274	-91.3067	439.265	843.875	-114.285	443.9	848.596	-36.798	358.401	864.728	-69.386	263.58	834.155	-68.3887	696.571	770.93	506.386	427.726	846.055	479.63	450.543	845.261	401.037	372.146	873.562	432.688	265.962	829.134	431.492
325	3.24	530.061	1293.22	213.308	562.75	1286.45	146.457	564.629	1286.48	281.821	664.764	1112.14	63.0079	689.784	1113.45	361.827	593.283	1062.64	215.218	704.861	775.268	-91.3224	439.205	843.922	-114.293	443.829	848.653	-36.7914	358.326	864.791	-69.3919	263.556	834.183	-68.4231	696.524	770.915	506.328	427.69	846.071	479.598	450.53	845.292	401.06	372.139	873.58	432.673	265.943	829.14	431.463
326	3.25	530.032	1293.29	213.316	562.745	1286.49	146.462	564.638	1286.54	281.848	664.79	1112.17	62.9963	689.778	1113.48	361.843	593.226	1062.75	215.232	704.878	775.281	-91.3214	439.181	843.961	-114.292	443.817	848.732	-36.7782	358.296	864.848	-69.3746	263.551	834.184	-68.413	696.556	770.939	506.325	427.692	846.109	479.597	450.575	845.326	401.112	372.141	873.605	432.675	266.036	829.153	431.421
327	3.26	530.081	1293.34	213.36	562.76	1286.55	146.503	564.693	1286.61	281.899	664.837	1112.19	63.0165	689.82	1113.5	361.866	593.216	1062.81	215.282	704.894	775.3	-91.3095	439.187	844	-114.262	443.829	848.793	-36.7477	358.285	864.882	-69.3399	263.569	834.191	-68.3608	696.561	770.949	506.35	427.726	846.12	479.626	450.602	845.371	401.15	372.169	873.611	432.684	266.1	829.174	431.424
328	3.27	530.074	1293.38	213.359	562.741	1286.6	146.523	564.708	1286.65	281.936	664.833	1112.19	63.0273	689.82	1113.51	361.892	593.182	1062.85	215.314	704.87	775.283	-91.295	439.177	844.009	-114.259	443.837	848.796	-36.7272	358.262	864.899	-69.3177	263.561	834.201	-68.3539	696.537	770.943	506.355	427.722	846.128	479.643	450.6	845.39	401.183	372.143	873.595	432.682	265.935	829.228	431.504
329	3.28	530.088	1293.34	213.332	562.709	1286.57	146.531	564.661	1286.64	281.917	664.794	1112.19	63.0186	689.782	1113.51	361.869	593.165	1062.82	215.303	704.863	775.291	-91.2922	439.14	844.001	-114.266	443.821	848.743	-36.7423	358.236	864.883	-69.3136	263.545	834.205	-68.3781	696.508	770.934	506.329	427.684	846.104	479.628	450.576	845.367	401.172	372.068	873.598	432.678	265.867	829.207	431.502
330	3.29	530.108	1293.29	213.337	562.779	1286.51	146.498	564.639	1286.56	281.877	664.789	1112.17	63.013	689.802	1113.47	361.835	593.268	1062.7	215.257	704.87	775.285	-91.2989	439.137	843.937	-114.286	443.813	848.682	-36.7572	358.296	864.82	-69.3553	263.574	834.206	-68.3821	696.517	770.922	506.325	427.69	846.085	479.62	450.559	845.313	401.11	372.066	873.59	432.676	265.881	829.177	431.484
331	3.3	530.237	1293.19	213.331	562.845	1286.45	146.491	564.712	1286.45	281.844	664.801	1112.15	63.0189	689.847	1113.43	361.826	593.422	1062.55	215.235	704.845	775.273	-91.2675	439.197	843.871	-114.296	443.875	848.623	-36.7784	358.386	864.745	-69.393	263.582	834.2	-68.3408	696.55	770.938	506.369	427.699	846.066	479.637	450.546	845.252	401.061	372.09	873.572	432.686	265.988	829.133	431.456
332	3.31	530.299	1293.11	213.299	562.885	1286.42	146.458	564.715	1286.41	281.817	664.776	1112.14	63.0134	689.852	1113.42	361.813	593.419	1062.5	215.204	704.836	775.281	-91.248	439.217	843.832	-114.317	443.89	848.588	-36.8119	358.403	864.692	-69.4188	263.582	834.18	-68.3728	696.503	770.948	506.377	427.673	846.048	479.613	450.528	845.207	401.043	372.052	873.588	432.691	265.984	829.153	431.429
333	3.32	530.246	1293.16	213.282	562.873	1286.45	146.424	564.658	1286.45	281.783	664.736	1112.15	63.0017	689.808	1113.43	361.809	593.371	1062.51	215.172	704.811	775.308	-91.2656	439.18	843.857	-114.325	443.862	848.587	-36.8268	358.367	864.712	-69.443	263.529	834.206	-68.3937	696.474	770.939	506.341	427.638	846.056	479.576	450.492	845.206	401.037	372.031	873.609	432.689	265.917	829.178	431.408
334	3.33	530.31	1293.23	213.264	562.904	1286.49	146.406	564.655	1286.55	281.811	664.753	1112.15	63.0006	689.823	1113.44	361.814	593.33	1062.6	215.199	704.796	775.306	-91.3092	439.196	843.879	-114.334	443.869	848.613	-36.8417	358.346	864.773	-69.4305	263.535	834.207	-68.4003	696.467	770.93	506.33	427.65	846.085	479.59	450.475	845.27	401.048	372.03	873.615	432.691	265.958	829.173	431.409
335	3.34	530.24	1293.37	213.319	562.922	1286.57	146.444	564.738	1286.66	281.884	664.799	1112.17	63.0212	689.879	1113.46	361.837	593.305	1062.72	215.267	704.823	775.308	-91.2984	439.24	843.919	-114.306	443.874	848.661	-36.8043	358.333	864.818	-69.3731	263.6	834.177	-68.3986	696.507	770.937	506.349	427.704	846.109	479.636	450.515	845.349	401.095	372.075	873.623	432.726	266.069	829.133	431.416
336	3.35	530.154	1293.5	213.356	562.882	1286.65	146.53	564.753	1286.78	281.943	664.803	1112.18	63.0382	689.868	1113.48	361.871	593.23	1062.84	215.312	704.833	775.316	-91.2867	439.236	843.977	-114.263	443.85	848.731	-36.7459	358.306	864.871	-69.3203	263.582	834.187	-68.3635	696.543	770.933	506.362	427.72	846.113	479.658	450.557	845.429	401.166	372.063	873.597	432.722	266.005	829.158	431.437
337	3.36	530.175	1293.53	213.363	562.854	1286.68	146.526	564.742	1286.8	281.942	664.797	1112.17	63.0394	689.821	1113.5	361.885	593.183	1062.88	215.313	704.825	775.317	-91.2938	439.216	844.01	-114.259	443.826	848.761	-36.7302	358.285	864.892	-69.3231	263.547	834.185	-68.3495	696.526	770.909	506.329	427.706	846.102	479.653	450.589	845.463	401.195	372.055	873.592	432.703	265.993	829.132	431.444
338	3.37	530.273	1293.51	213.35	562.941	1286.64	146.486	564.752	1286.79	281.926	664.798	1112.16	63.0406	689.829	1113.5	361.87	593.191	1062.83	215.32	704.793	775.293	-91.3359	439.222	843.974	-114.277	443.842	848.718	-36.7482	358.291	864.876	-69.3405	263.562	834.157	-68.3416	696.526	770.893	506.325	427.724	846.092	479.658	450.623	845.416	401.179	372.093	873.589	432.708	266.047	829.092	431.438
339	3.38	530.379	1293.45	213.36	562.995	1286.6	146.494	564.82	1286.72	281.915	664.829	1112.14	63.0655	689.863	1113.48	361.873	593.29	1062.74	215.335	704.809	775.286	-91.3465	439.27	843.909	-114.293	443.891	848.657	-36.7506	358.344	864.823	-69.3349	263.533	834.178	-68.2864	696.586	770.902	506.35	427.761	846.071	479.675	450.618	845.345	401.154	372.129	873.587	432.73	266.007	829.164	431.494
340	3.39	530.386	1293.4	213.312	562.999	1286.57	146.475	564.806	1286.65	281.871	664.82	1112.13	63.0661	689.905	1113.45	361.872	593.296	1062.65	215.314	704.889	775.301	-91.3249	439.264	843.855	-114.292	443.905	848.624	-36.7795	358.373	864.766	-69.3634	263.541	834.191	-68.2856	696.616	770.902	506.346	427.764	846.048	479.651	450.582	845.262	401.107	372.115	873.585	432.718	265.977	829.196	431.502
341	3.4	530.412	1293.32	213.233	563.034	1286.54	146.391	564.776	1286.62	281.778	664.777	1112.13	63.0347	689.878	1113.43	361.818	593.28	1062.57	215.245	704.881	775.29	-91.3292	439.252	843.857	-114.336	443.917	848.597	-36.846	358.359	864.73	-69.4353	263.539	834.188	-68.3128	696.571	770.891	506.294	427.725	846.046	479.6	450.559	845.2	401.047	372.089	873.589	432.688	265.931	829.221	431.439
342	3.41	530.404	1293.3	213.207	563.078	1286.53	146.299	564.791	1286.61	281.738	664.748	1112.12	63.0083	689.863	1113.42	361.792	593.3	1062.5	215.189	704.907	775.278	-91.3396	439.234	843.854	-114.365	443.894	848.599	-36.8758	358.362	864.716	-69.4784	263.577	834.182	-68.3732	696.545	770.893	506.293	427.703	846.049	479.574	450.531	845.184	401.001	372.135	873.6	432.676	266.004	829.182	431.386
343	3.42	530.351	1293.4	213.238	563.065	1286.57	146.337	564.845	1286.64	281.768	664.744	1112.12	63.0252	689.87	1113.43	361.832	593.329	1062.52	215.22	704.883	775.277	-91.3204	439.237	843.859	-114.341	443.906	848.613	-36.8389	358.366	864.735	-69.4452	263.564	834.189	-68.3569	696.594	770.917	506.317	427.736	846.055	479.589	450.534	845.221	401.032	372.169	873.612	432.701	266.069	829.143	431.407
344	3.43	530.216	1293.51	213.336	563.01	1286.64	146.424	564.831	1286.73	281.844	664.745	1112.12	63.062	689.835	1113.45	361.869	593.237	1062.62	215.31	704.899	775.301	-91.2842	439.253	843.898	-114.28	443.875	848.658	-36.7561	358.343	864.793	-69.3576	263.524	834.214	-68.2973	696.581	770.906	506.342	427.751	846.076	479.632	450.561	845.293	401.12	372.131	873.604	432.709	265.975	829.191	431.452
345	3.44	530.166	1293.58	213.367	562.943	1286.69	146.473	564.78	1286.84	281.899	664.722	1112.12	63.0813	689.775	1113.46	361.892	593.119	1062.72	215.348	704.89	775.316	-91.2598	439.23	843.947	-114.251	443.813	848.715	-36.7115	358.277	864.858	-69.2853	263.462	834.205	-68.2706	696.543	770.906	506.356	427.734	846.098	479.661	450.583	845.378	401.194	372.099	873.594	432.709	265.81	829.231	431.49
346	3.45	530.219	1293.59	213.358	562.915	1286.73	146.498	564.752	1286.89	281.901	664.718	1112.13	63.0835	689.739	1113.46	361.907	593.079	1062.75	215.348	704.843	775.296	-91.2745	439.187	843.961	-114.232	443.775	848.749	-36.7048	358.253	864.885	-69.2805	263.464	834.188	-68.3045	696.531	770.915	506.402	427.719	846.097	479.675	450.577	845.427	401.2	372.072	873.59	432.713	265.873	829.159	431.471
347	3.46	530.209	1293.56	213.375	562.901	1286.73	146.5	564.755	1286.88	281.904	664.733	1112.14	63.0945	689.765	1113.46	361.925	593.138	1062.7	215.37	704.865	775.305	-91.2771	439.152	843.969	-114.233	443.815	848.745	-36.7039	358.285	864.867	-69.2826	263.546	834.176	-68.3551	696.581	770.94	506.456	427.717	846.09	479.685	450.572	845.427	401.191	372.054	873.593	432.722	266.036	829.099	431.478
348	3.47	530.201	1293.49	213.355	562.889	1286.66	146.486	564.736	1286.83	281.875	664.729	1112.14	63.0963	689.766	1113.45	361.922	593.146	1062.64	215.368	704.89	775.307	-91.2267	439.176	843.973	-114.246	443.842	848.706	-36.7037	358.331	864.839	-69.2975	263.558	834.185	-68.332	696.54	770.942	506.469	427.709	846.087	479.681	450.554	845.391	401.164	372.052	873.597	432.721	265.953	829.125	431.486
349	3.48	530.205	1293.42	213.285	562.904	1286.61	146.431	564.696	1286.76	281.812	664.71	1112.14	63.068	689.771	1113.44	361.875	593.128	1062.59	215.301	704.868	775.311	-91.2207	439.198	843.943	-114.268	443.86	848.652	-36.731	358.342	864.803	-69.3585	263.543	834.212	-68.3256	696.495	770.936	506.433	427.682	846.094	479.65	450.53	845.334	401.122	372.065	873.613	432.714	265.842	829.207	431.49
350	3.49	530.258	1293.33	213.217	562.931	1286.55	146.327	564.683	1286.66	281.734	664.707	1112.14	63.0354	689.798	1113.42	361.823	593.222	1062.5	215.222	704.85	775.298	-91.2641	439.228	843.892	-114.328	443.864	848.626	-36.7962	358.347	864.758	-69.4358	263.57	834.213	-68.366	696.488	770.935	506.415	427.695	846.09	479.619	450.516	845.265	401.058	372.082	873.636	432.713	265.959	829.204	431.433
351	3.5	530.37	1293.25	213.162	563.002	1286.5	146.24	564.672	1286.59	281.69	664.722	1112.13	63.0206	689.84	1113.4	361.797	593.347	1062.4	215.173	704.833	775.275	-91.2797	439.244	843.853	-114.375	443.913	848.614	-36.859	358.389	864.728	-69.4798	263.593	834.218	-68.4069	696.479	770.938	506.426	427.713	846.085	479.611	450.504	845.226	401.009	372.107	873.637	432.708	266.061	829.181	431.404
352	3.51	530.297	1293.29	213.176	563.021	1286.48	146.249	564.631	1286.6	281.704	664.748	1112.11	63.0335	689.866	1113.4	361.783	593.348	1062.43	215.177	704.847	775.281	-91.2781	439.239	843.872	-114.354	443.951	848.62	-36.8578	358.388	864.749	-69.4574	263.599	834.221	-68.3966	696.494	770.945	506.436	427.714	846.085	479.618	450.512	845.248	401.031	372.124	873.632	432.702	266.007	829.216	431.44
353	3.52	530.114	1293.38	213.241	562.912	1286.53	146.296	564.609	1286.66	281.739	664.751	1112.11	63.0478	689.81	1113.41	361.813	593.177	1062.56	215.244	704.863	775.284	-91.2955	439.224	843.91	-114.303	443.879	848.667	-36.7944	358.329	864.807	-69.3903	263.59	834.22	-68.3667	696.511	770.944	506.428	427.7	846.099	479.634	450.53	845.311	401.101	372.104	873.618	432.715	265.944	829.22	431.464
354	3.53	530.004	1293.44	213.265	562.764	1286.57	146.36	564.609	1286.75	281.78	664.758	1112.11	63.0513	689.783	1113.41	361.835	593.113	1062.64	215.311	704.841	775.244	-91.3069	439.202	843.947	-114.275	443.818	848.721	-36.7529	358.267	864.862	-69.3368	263.548	834.189	-68.3291	696.518	770.935	506.43	427.711	846.102	479.653	450.555	845.374	401.171	372.092	873.607	432.73	265.955	829.203	431.473
355	3.54	530.083	1293.45	213.265	562.713	1286.58	146.37	564.618	1286.79	281.793	664.811	1112.11	63.0536	689.821	1113.41	361.841	593.158	1062.64	215.34	704.862	775.218	-91.3115	439.222	843.944	-114.274	443.859	848.732	-36.7389	358.285	864.882	-69.3184	263.572	834.179	-68.3128	696.555	770.921	506.438	427.743	846.099	479.669	450.594	845.398	401.191	372.104	873.599	432.722	266.049	829.168	431.476
356	3.55	530.084	1293.44	213.244	562.743	1286.54	146.32	564.611	1286.78	281.756	664.824	1112.1	63.04	689.899	1113.4	361.819	593.159	1062.59	215.323	704.91	775.206	-91.3489	439.231	843.944	-114.272	443.877	848.721	-36.741	358.341	864.866	-69.3371	263.558	834.19	-68.3281	696.584	770.911	506.416	427.757	846.098	479.665	450.632	845.381	401.194	372.122	873.588	432.707	266.098	829.141	431.463
357	3.56	530.026	1293.43	213.178	562.716	1286.51	146.267	564.566	1286.74	281.694	664.784	1112.08	63.0187	689.903	1113.38	361.79	593.135	1062.55	215.283	704.921	775.19	-91.3776	439.22	843.942	-114.272	443.871	848.705	-36.7692	358.335	864.855	-69.3568	263.528	834.199	-68.3337	696.557	770.879	506.361	427.738	846.102	479.65	450.614	845.344	401.181	372.138	873.597	432.703	265.974	829.202	431.503
358	3.57	530.118	1293.35	213.105	562.767	1286.46	146.168	564.555	1286.66	281.595	664.753	1112.06	63.0046	689.885	1113.38	361.759	593.172	1062.49	215.254	704.894	775.167	-91.3984	439.244	843.904	-114.313	443.878	848.688	-36.7994	358.342	864.824	-69.3811	263.578	834.195	-68.3485	696.549	770.883	506.321	427.761	846.089	479.645	450.613	845.289	401.159	372.132	873.601	432.706	265.978	829.201	431.484
359	3.58	530.262	1293.2	213.032	562.871	1286.37	146.068	564.567	1286.57	281.5	664.756	1112.06	62.9819	689.9	1113.36	361.727	593.289	1062.38	215.191	704.876	775.173	-91.3933	439.286	843.856	-114.342	443.939	848.646	-36.8376	358.401	864.765	-69.4282	263.619	834.187	-68.3731	696.576	770.892	506.308	427.775	846.086	479.634	450.609	845.242	401.086	372.187	873.609	432.709	266.008	829.192	431.463
360	3.59	530.321	1293.08	212.959	562.944	1286.31	146.008	564.532	1286.56	281.443	664.762	1112.04	62.9789	689.933	1113.33	361.711	593.357	1062.3	215.164	704.899	775.202	-91.3874	439.275	843.836	-114.323	443.975	848.611	-36.8434	358.422	864.738	-69.4458	263.626	834.196	-68.3706	696.609	770.905	506.298	427.759	846.079	479.618	450.598	845.227	401.043	372.167	873.613	432.703	266.034	829.177	431.436
361	3.6	530.23	1293.13	212.928	562.899	1286.34	145.986	564.486	1286.6	281.433	664.744	1112.04	62.9776	689.902	1113.36	361.715	593.268	1062.34	215.167	704.897	775.2	-91.372	439.234	843.856	-114.304	443.915	848.619	-36.8139	358.378	864.764	-69.4284	263.584	834.208	-68.3306	696.585	770.896	506.267	427.741	846.079	479.624	450.581	845.251	401.072	372.115	873.611	432.71	265.955	829.209	431.463
362	3.61	530.136	1293.26	212.942	562.844	1286.39	145.974	564.505	1286.66	281.433	664.727	1112.05	62.968	689.876	1113.38	361.719	593.207	1062.42	215.199	704.893	775.185	-91.3787	439.23	843.883	-114.289	443.853	848.67	-36.7782	358.347	864.805	-69.3782	263.58	834.208	-68.3268	696.569	770.894	506.249	427.74	846.083	479.635	450.591	845.299	401.115	372.096	873.604	432.721	265.943	829.203	431.468
363	3.62	530.04	1293.34	212.96	562.818	1286.45	145.99	564.522	1286.73	281.42	664.775	1112.07	62.9731	689.885	1113.39	361.738	593.168	1062.51	215.228	704.889	775.164	-91.3716	439.232	843.941	-114.27	443.82	848.725	-36.7506	358.308	864.848	-69.3254	263.581	834.217	-68.3458	696.586	770.904	506.241	427.768	846.098	479.647	450.597	845.352	401.143	372.112	873.599	432.719	265.974	829.187	431.473
364	3.63	530.078	1293.38	212.933	562.813	1286.49	145.979	564.493	1286.79	281.398	664.781	1112.07	62.9791	689.896	1113.41	361.746	593.122	1062.57	215.219	704.904	775.168	-91.361	439.228	843.964	-114.259	443.848	848.739	-36.7417	358.287	864.876	-69.308	263.581	834.222	-68.3466	696.611	770.927	506.236	427.775	846.112	479.657	450.618	845.366	401.173	372.116	873.608	432.724	265.925	829.218	431.498
365	3.64	530.117	1293.38	212.857	562.799	1286.5	145.917	564.452	1286.81	281.358	664.75	1112.07	62.9487	689.891	1113.4	361.699	593.137	1062.55	215.182	704.878	775.135	-91.3539	439.211	843.953	-114.289	443.861	848.725	-36.7728	358.285	864.887	-69.3394	263.526	834.248	-68.2983	696.59	770.914	506.212	427.748	846.121	479.646	450.626	845.344	401.164	372.111	873.618	432.716	265.861	829.267	431.522
366	3.65	530.261	1293.31	212.76	562.863	1286.47	145.801	564.465	1286.77	281.294	664.752	1112.07	62.9245	689.874	1113.39	361.648	593.171	1062.52	215.141	704.844	775.101	-91.3654	439.217	843.955	-114.327	443.866	848.708	-36.8113	358.334	864.859	-69.3874	263.527	834.245	-68.3158	696.559	770.906	506.199	427.722	846.123	479.619	450.618	845.3	401.111	372.117	873.623	432.708	265.882	829.277	431.506
367	3.66	530.491	1293.21	212.649	562.976	1286.41	145.7	564.427	1286.72	281.227	664.726	1112.05	62.9099	689.856	1113.38	361.62	593.188	1062.47	215.086	704.826	775.054	-91.3572	439.245	843.919	-114.358	443.91	848.679	-36.8415	358.354	864.827	-69.4227	263.562	834.219	-68.38	696.565	770.909	506.218	427.732	846.118	479.611	450.592	845.273	401.071	372.123	873.63	432.702	266.045	829.217	431.439
368	3.67	530.495	1293.17	212.635	563.013	1286.37	145.665	564.428	1286.7	281.2	664.717	1112.02	62.9041	689.828	1113.38	361.607	593.219	1062.43	215.076	704.86	775.039	-91.3328	439.247	843.877	-114.351	443.941	848.65	-36.8515	358.396	864.793	-69.4389	263.569	834.221	-68.39	696.591	770.915	506.241	427.738	846.1	479.617	450.558	845.258	401.061	372.115	873.622	432.694	266.138	829.155	431.404
369	3.68	530.453	1293.18	212.635	563.025	1286.34	145.65	564.43	1286.71	281.195	664.711	1112	62.9072	689.808	1113.37	361.596	593.247	1062.41	215.084	704.858	775.04	-91.3474	439.23	843.865	-114.327	443.918	848.637	-36.8352	358.38	864.788	-69.4251	263.559	834.204	-68.3536	696.585	770.928	506.236	427.738	846.082	479.627	450.55	845.265	401.072	372.104	873.609	432.698	266.115	829.154	431.423
370	3.69	530.463	1293.21	212.643	562.958	1286.34	145.658	564.43	1286.74	281.212	664.715	1111.99	62.9104	689.802	1113.36	361.582	593.226	1062.42	215.116	704.856	774.997	-91.3592	439.254	843.863	-114.327	443.845	848.637	-36.7959	358.359	864.801	-69.3897	263.575	834.182	-68.3255	696.571	770.916	506.227	427.736	846.088	479.639	450.554	845.293	401.098	372.101	873.593	432.706	266.071	829.147	431.458
371	3.7	530.362	1293.31	212.666	562.879	1286.37	145.682	564.391	1286.79	281.201	664.696	1111.99	62.9189	689.775	1113.37	361.604	593.178	1062.45	215.128	704.832	774.98	-91.3403	439.215	843.894	-114.297	443.844	848.638	-36.7702	358.337	864.806	-69.357	263.567	834.183	-68.3375	696.591	770.914	506.235	427.722	846.095	479.652	450.551	845.315	401.114	372.105	873.584	432.721	266.014	829.14	431.498
372	3.71	530.248	1293.39	212.663	562.854	1286.41	145.696	564.373	1286.85	281.198	664.676	1111.98	62.9209	689.767	1113.39	361.625	593.107	1062.5	215.128	704.816	774.972	-91.3364	439.229	843.887	-114.274	443.85	848.667	-36.7485	358.329	864.826	-69.3393	263.541	834.196	-68.3159	696.602	770.914	506.235	427.725	846.113	479.656	450.58	845.348	401.14	372.091	873.587	432.728	265.936	829.172	431.529
373	3.72	530.118	1293.44	212.652	562.818	1286.43	145.684	564.383	1286.87	281.175	664.68	1111.99	62.897	689.793	1113.4	361.635	593.081	1062.51	215.13	704.84	774.948	-91.3518	439.258	843.902	-114.279	443.867	848.695	-36.7623	358.345	864.847	-69.3361	263.557	834.206	-68.3052	696.598	770.912	506.232	427.761	846.128	479.657	450.615	845.364	401.158	372.115	873.601	432.722	265.898	829.227	431.528
374	3.73	530.178	1293.41	212.594	562.834	1286.42	145.619	564.383	1286.85	281.135	664.678	1111.99	62.8768	689.787	1113.4	361.617	593.104	1062.48	215.112	704.861	774.939	-91.3629	439.224	843.94	-114.275	443.881	848.685	-36.7856	358.353	864.844	-69.3586	263.586	834.213	-68.3432	696.567	770.91	506.213	427.767	846.124	479.637	450.622	845.331	401.152	372.145	873.603	432.707	265.895	829.262	431.505
375	3.74	530.337	1293.27	212.507	562.901	1286.36	145.55	564.391	1286.78	281.084	664.683	1111.98	62.8709	689.802	1113.37	361.563	593.173	1062.41	215.039	704.864	774.954	-91.352	439.235	843.91	-114.302	443.928	848.654	-36.8284	358.386	864.81	-69.4194	263.575	834.223	-68.3842	696.576	770.939	506.228	427.747	846.107	479.615	450.622	845.278	401.112	372.142	873.604	432.695	266.02	829.248	431.46
376	3.75	530.578	1293.13	212.431	562.94	1286.31	145.5	564.405	1286.7	281.036	664.693	1111.97	62.8688	689.814	1113.34	361.533	593.24	1062.34	214.982	704.916	774.986	-91.3415	439.261	843.857	-114.357	443.993	848.613	-36.8921	358.443	864.77	-69.4683	263.608	834.204	-68.3997	696.591	770.947	506.242	427.744	846.091	479.597	450.631	845.231	401.066	372.144	873.597	432.69	266.151	829.192	431.42
377	3.76	530.618	1293.09	212.413	562.95	1286.29	145.486	564.399	1286.68	281.015	664.696	1111.97	62.8647	689.79	1113.33	361.524	593.271	1062.32	215.003	704.904	775.007	-91.3588	439.277	843.836	-114.374	444.001	848.599	-36.8946	358.445	864.752	-69.4664	263.623	834.204	-68.4019	696.625	770.966	506.235	427.728	846.082	479.595	450.601	845.223	401.047	372.173	873.592	432.683	266.104	829.157	431.415
378	3.77	530.396	1293.17	212.457	562.887	1286.31	145.522	564.376	1286.71	281.037	664.69	1111.97	62.8734	689.759	1113.35	361.558	593.213	1062.36	215.048	704.863	774.993	-91.369	439.267	843.851	-114.324	443.936	848.633	-36.8414	358.385	864.78	-69.428	263.57	834.211	-68.3668	696.621	770.95	506.23	427.726	846.086	479.604	450.611	845.253	401.088	372.153	873.598	432.682	265.963	829.205	431.464
379	3.78	530.185	1293.24	212.522	562.8	1286.36	145.567	564.318	1286.76	281.088	664.678	1111.98	62.8821	689.719	1113.36	361.576	593.111	1062.44	215.062	704.849	774.994	-91.355	439.222	843.885	-114.3	443.889	848.666	-36.797	358.334	864.815	-69.3756	263.509	834.213	-68.3511	696.574	770.918	506.227	427.736	846.098	479.628	450.634	845.297	401.135	372.131	873.596	432.689	265.918	829.205	431.492
380	3.79	530.19	1293.26	212.564	562.753	1286.4	145.621	564.285	1286.81	281.128	664.713	1111.99	62.8972	689.762	1113.36	361.584	593.133	1062.46	215.079	704.871	775.015	-91.3411	439.202	843.891	-114.282	443.917	848.686	-36.7723	358.341	864.845	-69.3459	263.492	834.219	-68.3499	696.598	770.914	506.243	427.76	846.095	479.647	450.655	845.339	401.152	372.136	873.583	432.702	265.948	829.161	431.487
381	3.8	530.112	1293.32	212.626	562.722	1286.41	145.673	564.253	1286.81	281.147	664.729	1112	62.909	689.807	1113.36	361.602	593.131	1062.47	215.112	704.903	775.019	-91.3493	439.219	843.905	-114.262	443.902	848.699	-36.7426	358.348	864.868	-69.3213	263.52	834.216	-68.3177	696.617	770.917	506.222	427.785	846.093	479.667	450.662	845.373	401.175	372.147	873.571	432.708	265.913	829.174	431.508
382	3.81	530.026	1293.32	212.653	562.671	1286.41	145.685	564.234	1286.8	281.169	664.727	1111.99	62.9166	689.805	1113.36	361.608	593.083	1062.49	215.133	704.919	775.014	-91.369	439.192	843.925	-114.257	443.838	848.708	-36.7267	358.31	864.873	-69.3117	263.513	834.226	-68.294	696.599	770.896	506.207	427.772	846.09	479.668	450.621	845.362	401.178	372.137	873.578	432.709	265.934	829.185	431.489
383	3.82	530.053	1293.22	212.607	562.71	1286.36	145.625	564.257	1286.73	281.141	664.72	1111.96	62.9124	689.848	1113.33	361.582	593.142	1062.4	215.089	704.936	775.028	-91.362	439.206	843.898	-114.278	443.854	848.666	-36.7586	358.346	864.83	-69.3468	263.545	834.218	-68.3224	696.596	770.874	506.195	427.762	846.083	479.65	450.603	845.301	401.131	372.135	873.587	432.71	265.954	829.194	431.47
384	3.83	530.202	1293.06	212.539	562.81	1286.28	145.558	564.243	1286.63	281.081	664.713	1111.95	62.9022	689.896	1113.29	361.551	593.255	1062.27	215.031	704.941	775.01	-91.3502	439.219	843.85	-114.323	443.914	848.601	-36.8151	358.422	864.756	-69.4253	263.637	834.203	-68.3892	696.618	770.861	506.186	427.774	846.075	479.627	450.581	845.249	401.053	372.155	873.587	432.706	266	829.209	431.444
385	3.84	530.257	1292.99	212.55	562.878	1286.23	145.536	564.247	1286.56	281.076	664.71	1111.93	62.9018	689.898	1113.26	361.529	593.314	1062.21	215.009	704.876	774.954	-91.346	439.248	843.821	-114.351	443.946	848.573	-36.8514	358.457	864.697	-69.4693	263.673	834.181	-68.4408	696.637	770.846	506.166	427.772	846.05	479.606	450.55	845.203	401.017	372.19	873.579	432.703	266.09	829.183	431.414
386	3.85	530.144	1293.03	212.58	562.852	1286.21	145.582	564.203	1286.57	281.096	664.674	1111.92	62.9018	689.852	1113.25	361.55	593.305	1062.2	215.035	704.908	774.968	-91.3611	439.253	843.809	-114.367	443.932	848.559	-36.8589	358.426	864.704	-69.4643	263.617	834.186	-68.3952	696.643	770.837	506.138	427.757	846.047	479.612	450.548	845.205	401.033	372.151	873.582	432.706	266.039	829.187	431.445
387	3.86	530.071	1293.08	212.617	562.81	1286.22	145.616	564.218	1286.59	281.141	664.669	1111.93	62.9243	689.84	1113.25	361.574	593.288	1062.23	215.078	704.886	774.98	-91.3727	439.253	843.821	-114.364	443.947	848.567	-36.8471	358.414	864.733	-69.447	263.589	834.194	-68.3672	696.624	770.821	506.117	427.77	846.046	479.626	450.6	845.225	401.074	372.104	873.575	432.718	265.941	829.223	431.493
388	3.87	529.98	1293.11	212.68	562.792	1286.27	145.649	564.253	1286.66	281.177	664.697	1111.94	62.9447	689.862	1113.27	361.6	593.246	1062.3	215.12	704.856	774.959	-91.3571	439.269	843.853	-114.345	443.983	848.607	-36.8334	358.399	864.767	-69.4056	263.588	834.203	-68.3678	696.609	770.802	506.116	427.759	846.064	479.636	450.645	845.262	401.115	372.126	873.578	432.726	265.995	829.202	431.493
389	3.88	529.934	1293.27	212.733	562.723	1286.36	145.721	564.261	1286.75	281.216	664.712	1111.95	62.9544	689.885	1113.31	361.635	593.183	1062.4	215.156	704.869	774.971	-91.35	439.265	843.875	-114.319	443.955	848.672	-36.7967	358.384	864.824	-69.3734	263.619	834.202	-68.3777	696.63	770.791	506.101	427.766	846.1	479.646	450.614	845.328	401.135	372.139	873.606	432.722	266.002	829.224	431.497
390	3.89	529.79	1293.4	212.786	562.6	1286.46	145.804	564.25	1286.83	281.261	664.688	1111.97	62.9553	689.871	1113.33	361.663	593.058	1062.51	215.187	704.891	775.006	-91.3357	439.236	843.93	-114.291	443.897	848.735	-36.7684	358.333	864.887	-69.3564	263.56	834.221	-68.3405	696.612	770.796	506.071	427.738	846.13	479.638	450.597	845.378	401.176	372.117	873.621	432.713	265.97	829.242	431.472
391	3.9	529.708	1293.43	212.799	562.58	1286.49	145.831	564.242	1286.87	281.308	664.679	1111.98	62.9551	689.845	1113.34	361.682	593.006	1062.56	215.21	704.898	775.038	-91.3188	439.223	843.966	-114.285	443.867	848.763	-36.7497	358.308	864.903	-69.3546	263.533	834.242	-68.3354	696.583	770.79	506.075	427.736	846.134	479.641	450.597	845.404	401.189	372.091	873.638	432.727	265.907	829.273	431.478
392	3.91	529.83	1293.38	212.834	562.663	1286.45	145.835	564.28	1286.82	281.325	664.698	1111.98	62.9839	689.847	1113.32	361.703	593.097	1062.47	215.216	704.868	775.033	-91.2986	439.224	843.938	-114.28	443.884	848.719	-36.7527	358.354	864.868	-69.3513	263.546	834.222	-68.3549	696.591	770.801	506.108	427.751	846.114	479.657	450.598	845.368	401.16	372.087	873.623	432.739	265.921	829.216	431.506
393	3.92	530.02	1293.27	212.82	562.739	1286.38	145.826	564.323	1286.75	281.313	664.718	1111.96	63.005	689.863	1113.29	361.687	593.235	1062.33	215.193	704.899	775.038	-91.2818	439.246	843.886	-114.307	443.895	848.647	-36.7668	358.395	864.798	-69.38	263.521	834.205	-68.3273	696.618	770.817	506.142	427.783	846.066	479.653	450.591	845.311	401.107	372.079	873.595	432.727	265.961	829.17	431.515
394	3.93	530.14	1293.12	212.784	562.81	1286.3	145.804	564.325	1286.66	281.295	664.697	1111.94	63.0188	689.866	1113.24	361.663	593.302	1062.21	215.172	704.912	775.043	-91.2705	439.262	843.837	-114.326	443.887	848.578	-36.7872	358.395	864.749	-69.4175	263.542	834.211	-68.3481	696.615	770.8	506.162	427.781	846.032	479.649	450.565	845.241	401.076	372.08	873.592	432.731	266.011	829.154	431.513
395	3.94	530.175	1293.07	212.753	562.846	1286.27	145.788	564.326	1286.6	281.274	664.655	1111.91	63.0206	689.853	1113.2	361.666	593.333	1062.13	215.159	704.96	775.041	-91.2718	439.244	843.813	-114.335	443.906	848.535	-36.8167	358.383	864.71	-69.4343	263.524	834.211	-68.3438	696.617	770.786	506.159	427.743	846.02	479.637	450.557	845.172	401.056	372.094	873.594	432.741	265.994	829.153	431.492
396	3.95	530.225	1293.09	212.769	562.908	1286.27	145.782	564.375	1286.59	281.28	664.665	1111.89	63.0316	689.867	1113.19	361.67	593.367	1062.12	215.177	704.961	775.042	-91.2765	439.238	843.813	-114.33	443.935	848.531	-36.8316	358.404	864.698	-69.4411	263.518	834.193	-68.3306	696.613	770.783	506.148	427.756	846.025	479.652	450.58	845.154	401.053	372.125	873.583	432.739	265.931	829.187	431.479
397	3.96	530.136	1293.18	212.841	562.85	1286.36	145.842	564.395	1286.65	281.331	664.722	1111.91	63.0404	689.905	1113.22	361.697	593.331	1062.21	215.192	704.924	775.036	-91.2777	439.237	843.856	-114.309	443.933	848.583	-36.8259	358.402	864.751	-69.4163	263.55	834.185	-68.3445	696.613	770.782	506.15	427.773	846.041	479.661	450.631	845.206	401.09	372.15	873.594	432.745	265.978	829.17	431.473
398	3.97	529.934	1293.37	212.921	562.728	1286.48	145.924	564.359	1286.78	281.387	664.73	1111.94	63.0415	689.878	1113.25	361.727	593.143	1062.38	215.234	704.908	775.041	-91.2676	439.185	843.91	-114.266	443.875	848.676	-36.7858	358.328	864.829	-69.3778	263.569	834.202	-68.3732	696.622	770.773	506.148	427.762	846.065	479.655	450.645	845.291	401.146	372.15	873.599	432.748	265.984	829.194	431.467
399	3.98	529.753	1293.54	212.981	562.615	1286.57	146.003	564.35	1286.93	281.458	664.749	1111.97	63.0661	689.864	1113.26	361.745	593.044	1062.51	215.277	704.909	775.022	-91.2696	439.188	843.943	-114.237	443.822	848.758	-36.7349	358.28	864.891	-69.3355	263.621	834.221	-68.3899	696.626	770.761	506.133	427.783	846.094	479.661	450.614	845.386	401.186	372.146	873.607	432.74	265.985	829.218	431.455
400	3.99	529.783	1293.63	212.987	562.565	1286.62	146.057	564.392	1287	281.502	664.785	1111.98	63.0758	689.893	1113.27	361.764	593.066	1062.55	215.3	704.952	775.051	-91.2677	439.23	843.971	-114.256	443.863	848.775	-36.7294	358.283	864.918	-69.3287	263.643	834.212	-68.3785	696.622	770.739	506.137	427.809	846.11	479.664	450.638	845.42	401.207	372.176	873.617	432.741	266.072	829.2	431.441
401	4	529.839	1293.62	212.975	562.681	1286.61	146.049	564.434	1286.98	281.528	664.805	1111.99	63.074	689.897	1113.25	361.772	593.134	1062.51	215.292	704.954	775.075	-91.264	439.245	843.96	-114.273	443.907	848.761	-36.7497	358.325	864.889	-69.3468	263.654	834.197	-68.4081	696.62	770.729	506.143	427.791	846.116	479.66	450.651	845.405	401.193	372.172	873.618	432.743	266.131	829.199	431.421
402	4.01	529.902	1293.52	212.985	562.795	1286.56	146.014	564.411	1286.9	281.515	664.765	1111.97	63.0682	689.884	1113.22	361.767	593.218	1062.4	215.271	704.955	775.066	-91.2734	439.234	843.914	-114.28	443.892	848.702	-36.759	358.37	864.829	-69.3872	263.628	834.187	-68.4114	696.632	770.728	506.149	427.753	846.103	479.65	450.613	845.37	401.147	372.14	873.616	432.742	266.051	829.192	431.432
403	4.02	530.036	1293.39	212.992	562.905	1286.48	145.978	564.413	1286.8	281.497	664.745	1111.94	63.0786	689.921	1113.18	361.748	593.332	1062.25	215.255	704.934	775.048	-91.2634	439.279	843.843	-114.308	443.939	848.597	-36.7977	358.399	864.749	-69.415	263.613	834.182	-68.3891	696.64	770.726	506.141	427.74	846.062	479.642	450.586	845.305	401.096	372.105	873.603	432.757	266.08	829.134	431.451
404	4.03	530.212	1293.26	213.001	563.002	1286.38	145.972	564.467	1286.7	281.48	664.776	1111.92	63.1019	689.969	1113.14	361.735	593.448	1062.12	215.233	704.921	775.044	-91.2565	439.301	843.791	-114.299	443.971	848.53	-36.8236	358.454	864.689	-69.4375	263.609	834.157	-68.3655	696.655	770.726	506.159	427.79	846.024	479.67	450.58	845.235	401.06	372.105	873.583	432.762	266.155	829.089	431.445
405	4.04	530.337	1293.18	212.951	562.97	1286.35	145.976	564.464	1286.66	281.473	664.786	1111.93	63.117	689.978	1113.12	361.743	593.464	1062.09	215.227	704.932	775.057	-91.2554	439.305	843.771	-114.311	443.974	848.517	-36.8334	358.477	864.671	-69.4523	263.597	834.166	-68.3686	696.659	770.715	506.144	427.79	846.013	479.677	450.554	845.213	401.043	372.081	873.581	432.764	266.098	829.115	431.457
406	4.05	530.257	1293.24	212.969	562.842	1286.41	146.052	564.435	1286.71	281.505	664.772	1111.94	63.1204	689.976	1113.13	361.76	593.39	1062.15	215.248	704.922	775.08	-91.2497	439.297	843.79	-114.295	443.978	848.529	-36.8191	358.43	864.683	-69.4302	263.566	834.194	-68.3615	696.651	770.712	506.13	427.771	846.03	479.668	450.544	845.221	401.071	372.069	873.6	432.767	265.932	829.211	431.515
407	4.06	530.13	1293.38	213.036	562.771	1286.48	146.126	564.427	1286.81	281.547	664.78	1111.96	63.1345	689.949	1113.16	361.78	593.355	1062.24	215.287	704.88	775.092	-91.2533	439.265	843.845	-114.281	443.939	848.588	-36.7795	358.404	864.756	-69.3905	263.548	834.196	-68.3492	696.615	770.697	506.114	427.76	846.063	479.672	450.597	845.27	401.131	372.089	873.613	432.784	265.906	829.265	431.519
408	4.07	530.097	1293.47	213.053	562.744	1286.54	146.159	564.426	1286.9	281.587	664.802	1111.98	63.1499	689.969	1113.17	361.806	593.259	1062.38	215.325	704.85	775.074	-91.2327	439.266	843.901	-114.27	443.899	848.665	-36.7437	358.362	864.831	-69.3534	263.534	834.211	-68.3244	696.612	770.693	506.106	427.771	846.084	479.687	450.61	845.334	401.173	372.091	873.632	432.799	265.98	829.255	431.493
409	4.08	530.026	1293.52	213.068	562.724	1286.61	146.177	564.407	1286.97	281.619	664.795	1111.99	63.1525	689.969	1113.19	361.826	593.2	1062.46	215.351	704.911	775.082	-91.2308	439.274	843.942	-114.261	443.92	848.712	-36.7455	358.33	864.871	-69.339	263.568	834.227	-68.3557	696.62	770.687	506.101	427.763	846.11	479.696	450.602	845.384	401.181	372.076	873.638	432.786	265.997	829.236	431.488
410	4.09	529.911	1293.57	213.104	562.667	1286.65	146.191	564.422	1286.98	281.614	664.799	1112	63.1483	689.957	1113.2	361.82	593.184	1062.47	215.365	704.917	775.099	-91.2312	439.281	843.957	-114.275	443.899	848.736	-36.7409	358.295	864.9	-69.3393	263.539	834.239	-68.3721	696.632	770.69	506.094	427.769	846.112	479.688	450.59	845.413	401.175	372.074	873.63	432.769	266.051	829.181	431.483
411	4.1	529.929	1293.58	213.125	562.65	1286.63	146.196	564.41	1286.95	281.635	664.809	1111.99	63.1528	689.966	1113.2	361.824	593.186	1062.44	215.365	704.905	775.109	-91.2289	439.227	843.968	-114.268	443.871	848.73	-36.7205	358.31	864.882	-69.3319	263.51	834.248	-68.3757	696.637	770.674	506.084	427.773	846.098	479.687	450.565	845.403	401.166	372.08	873.627	432.776	266.012	829.202	431.478
412	4.11	530.003	1293.46	213.099	562.731	1286.58	146.171	564.427	1286.85	281.61	664.79	1111.96	63.161	689.998	1113.17	361.818	593.253	1062.34	215.354	704.902	775.091	-91.2458	439.197	843.933	-114.252	443.853	848.683	-36.7244	358.352	864.825	-69.3591	263.538	834.232	-68.3703	696.64	770.651	506.077	427.765	846.078	479.682	450.549	845.343	401.142	372.104	873.625	432.778	266.076	829.174	431.467
413	4.12	530.219	1293.27	213.002	562.822	1286.5	146.1	564.446	1286.74	281.542	664.783	1111.94	63.1551	690.052	1113.12	361.784	593.365	1062.19	215.3	704.9	775.09	-91.2282	439.264	843.852	-114.297	443.912	848.599	-36.7819	358.365	864.765	-69.4165	263.527	834.24	-68.3519	696.664	770.647	506.057	427.745	846.037	479.66	450.557	845.255	401.082	372.141	873.616	432.777	266.047	829.191	431.463
414	4.13	530.302	1293.2	212.965	562.93	1286.43	146.036	564.478	1286.67	281.506	664.8	1111.91	63.1397	690.07	1113.08	361.743	593.475	1062.08	215.254	704.919	775.077	-91.2251	439.294	843.806	-114.339	443.978	848.543	-36.8354	358.419	864.717	-69.453	263.568	834.217	-68.3805	696.681	770.641	506.037	427.748	846.022	479.65	450.577	845.214	401.045	372.157	873.615	432.772	266.024	829.207	431.447
415	4.14	530.169	1293.27	213.016	562.895	1286.44	146.066	564.488	1286.68	281.53	664.804	1111.91	63.1372	690.074	1113.09	361.748	593.481	1062.06	215.276	704.946	775.077	-91.2632	439.279	843.819	-114.334	443.98	848.541	-36.8418	358.441	864.711	-69.4433	263.538	834.205	-68.3672	696.687	770.623	506.031	427.77	846.023	479.66	450.585	845.206	401.063	372.168	873.604	432.778	266.026	829.236	431.472
416	4.15	530.134	1293.38	213.063	562.802	1286.49	146.142	564.479	1286.76	281.599	664.82	1111.93	63.1562	690.053	1113.09	361.779	593.403	1062.15	215.324	704.944	775.063	-91.2568	439.287	843.842	-114.32	443.947	848.577	-36.7938	358.429	864.735	-69.3972	263.526	834.205	-68.3373	696.669	770.612	506.041	427.803	846.042	479.682	450.598	845.25	401.115	372.184	873.595	432.785	266.001	829.238	431.505
417	4.16	530.125	1293.44	213.081	562.757	1286.53	146.221	564.488	1286.82	281.641	664.843	1111.94	63.1686	690.038	1113.11	361.822	593.343	1062.26	215.348	704.953	775.051	-91.2423	439.259	843.881	-114.296	443.938	848.621	-36.7477	358.414	864.791	-69.3642	263.553	834.189	-68.347	696.696	770.619	506.059	427.838	846.048	479.703	450.665	845.306	401.165	372.145	873.593	432.784	266.017	829.201	431.507
418	4.17	530.067	1293.5	213.112	562.718	1286.58	146.219	564.48	1286.88	281.66	664.845	1111.94	63.1638	690.029	1113.15	361.823	593.304	1062.34	215.366	704.927	775.032	-91.2432	439.249	843.911	-114.287	443.894	848.678	-36.7386	358.394	864.836	-69.3493	263.597	834.181	-68.3566	696.687	770.618	506.043	427.839	846.047	479.706	450.733	845.353	401.203	372.153	873.603	432.787	265.96	829.203	431.517
419	4.18	529.996	1293.54	213.133	562.731	1286.62	146.192	564.464	1286.92	281.679	664.829	1111.95	63.1677	690.036	1113.17	361.826	593.275	1062.38	215.394	704.93	775.039	-91.2487	439.268	843.931	-114.262	443.87	848.7	-36.7421	358.395	864.839	-69.3509	263.613	834.175	-68.3619	696.66	770.621	506.031	427.834	846.061	479.702	450.699	845.399	401.228	372.161	873.602	432.783	265.986	829.207	431.511
420	4.19	529.972	1293.53	213.108	562.733	1286.61	146.167	564.425	1286.9	281.637	664.816	1111.95	63.1499	690.003	1113.15	361.823	593.241	1062.38	215.373	704.932	775.052	-91.2482	439.291	843.93	-114.285	443.862	848.695	-36.7451	358.39	864.839	-69.3675	263.584	834.193	-68.371	696.646	770.622	506.022	427.821	846.075	479.681	450.651	845.393	401.217	372.153	873.625	432.78	266.021	829.197	431.498
421	4.2	529.926	1293.51	213.089	562.71	1286.57	146.127	564.366	1286.86	281.59	664.801	1111.94	63.1339	689.987	1113.14	361.798	593.277	1062.3	215.305	704.908	775.06	-91.242	439.314	843.909	-114.314	443.889	848.673	-36.7818	358.428	864.818	-69.4183	263.627	834.206	-68.417	696.641	770.633	506.022	427.789	846.079	479.673	450.6	845.342	401.152	372.141	873.635	432.776	266.083	829.218	431.476
422	4.21	529.956	1293.45	213.051	562.711	1286.5	146.111	564.351	1286.81	281.566	664.769	1111.93	63.1298	690	1113.13	361.779	593.328	1062.23	215.259	704.879	775.055	-91.2442	439.322	843.871	-114.338	443.959	848.623	-36.834	358.427	864.774	-69.442	263.648	834.196	-68.4258	696.647	770.646	506.021	427.737	846.074	479.663	450.531	845.311	401.081	372.127	873.642	432.776	266.153	829.196	431.444
423	4.22	530.022	1293.35	213.012	562.737	1286.46	146.093	564.32	1286.76	281.536	664.765	1111.91	63.1341	690.006	1113.12	361.769	593.363	1062.16	215.256	704.862	775.043	-91.2463	439.298	843.856	-114.331	443.933	848.602	-36.8217	358.425	864.747	-69.4384	263.612	834.185	-68.3889	696.658	770.665	506.015	427.726	846.065	479.651	450.512	845.281	401.053	372.101	873.645	432.773	266.069	829.205	431.46
424	4.23	529.974	1293.34	212.998	562.694	1286.45	146.081	564.317	1286.75	281.53	664.751	1111.91	63.1431	689.985	1113.13	361.791	593.348	1062.11	215.26	704.859	775.04	-91.2339	439.287	843.856	-114.319	443.925	848.591	-36.8075	358.412	864.755	-69.4438	263.55	834.214	-68.344	696.635	770.66	506.023	427.717	846.064	479.655	450.509	845.271	401.06	372.101	873.635	432.78	265.904	829.27	431.494
425	4.24	529.906	1293.34	213.001	562.691	1286.47	146.092	564.301	1286.76	281.558	664.73	1111.91	63.1483	689.999	1113.12	361.79	593.309	1062.14	215.28	704.866	775.049	-91.2212	439.283	843.863	-114.298	443.94	848.589	-36.8017	358.406	864.76	-69.424	263.564	834.228	-68.3461	696.638	770.649	506.04	427.708	846.063	479.68	450.516	845.282	401.087	372.093	873.619	432.782	265.854	829.259	431.51
426	4.25	529.891	1293.38	213.059	562.611	1286.48	146.138	564.305	1286.78	281.582	664.737	1111.91	63.1508	690.003	1113.12	361.79	593.315	1062.17	215.299	704.894	775.045	-91.241	439.235	843.868	-114.255	443.902	848.616	-36.7778	358.39	864.781	-69.3757	263.576	834.215	-68.3405	696.663	770.647	506.038	427.737	846.048	479.691	450.519	845.312	401.124	372.072	873.602	432.782	265.941	829.21	431.506
427	4.26	529.926	1293.38	213.075	562.593	1286.52	146.15	564.305	1286.85	281.607	664.776	1111.9	63.1628	689.99	1113.11	361.792	593.301	1062.18	215.318	704.9	775.024	-91.2716	439.233	843.897	-114.235	443.871	848.64	-36.7559	358.365	864.797	-69.338	263.6	834.19	-68.3474	696.667	770.641	506.042	427.766	846.042	479.701	450.54	845.346	401.148	372.076	873.591	432.785	266.027	829.168	431.481
428	4.27	529.91	1293.38	213.069	562.57	1286.53	146.164	564.279	1286.87	281.608	664.783	1111.9	63.1704	689.977	1113.11	361.799	593.262	1062.22	215.341	704.881	775.002	-91.2497	439.246	843.927	-114.237	443.854	848.668	-36.7354	358.349	864.817	-69.3323	263.557	834.197	-68.317	696.664	770.639	506.055	427.774	846.05	479.709	450.6	845.353	401.187	372.091	873.586	432.791	265.925	829.213	431.504
429	4.28	529.88	1293.39	213.067	562.576	1286.51	146.148	564.268	1286.84	281.606	664.775	1111.9	63.165	689.98	1113.11	361.794	593.262	1062.21	215.339	704.871	774.991	-91.2445	439.237	843.94	-114.254	443.853	848.662	-36.7453	358.348	864.83	-69.3422	263.561	834.193	-68.3491	696.667	770.621	506.028	427.783	846.061	479.707	450.65	845.339	401.185	372.116	873.597	432.795	265.953	829.229	431.509
430	4.29	529.877	1293.4	213.044	562.612	1286.49	146.098	564.284	1286.81	281.55	664.776	1111.9	63.1404	690	1113.13	361.771	593.299	1062.17	215.304	704.907	774.991	-91.2666	439.248	843.913	-114.299	443.887	848.658	-36.773	358.39	864.82	-69.3805	263.612	834.182	-68.4088	696.677	770.623	506.013	427.808	846.062	479.684	450.652	845.324	401.146	372.17	873.605	432.781	266.057	829.216	431.473
431	4.3	529.919	1293.37	213.022	562.612	1286.49	146.059	564.299	1286.76	281.501	664.783	1111.9	63.1352	690.014	1113.13	361.743	593.366	1062.11	215.249	704.942	774.991	-91.2687	439.3	843.886	-114.333	443.939	848.65	-36.8113	358.428	864.821	-69.428	263.643	834.175	-68.4156	696.708	770.629	506.004	427.823	846.065	479.67	450.642	845.293	401.105	372.168	873.61	432.762	266.091	829.23	431.466
432	4.31	529.87	1293.35	213	562.642	1286.48	146.031	564.275	1286.75	281.484	664.784	1111.91	63.129	689.988	1113.11	361.736	593.346	1062.1	215.222	704.932	774.977	-91.2587	439.297	843.883	-114.324	443.942	848.644	-36.8234	358.426	864.809	-69.4465	263.669	834.192	-68.4253	696.692	770.615	505.99	427.805	846.069	479.66	450.642	845.274	401.09	372.167	873.623	432.76	266.026	829.249	431.472
433	4.32	529.88	1293.35	213.007	562.61	1286.48	146.039	564.236	1286.79	281.492	664.774	1111.9	63.1195	689.998	1113.11	361.744	593.324	1062.1	215.227	704.935	774.984	-91.2622	439.28	843.901	-114.322	443.948	848.641	-36.8207	358.406	864.813	-69.4332	263.636	834.222	-68.4216	696.675	770.63	505.985	427.798	846.064	479.663	450.642	845.279	401.102	372.183	873.628	432.772	265.96	829.264	431.479
434	4.33	529.866	1293.4	213.01	562.566	1286.5	146.067	564.253	1286.8	281.524	664.767	1111.9	63.1349	690.019	1113.12	361.751	593.316	1062.11	215.253	704.919	774.988	-91.2733	439.265	843.914	-114.293	443.94	848.642	-36.8121	358.404	864.816	-69.4047	263.613	834.202	-68.3823	696.699	770.628	505.979	427.821	846.068	479.685	450.654	845.291	401.119	372.177	873.618	432.772	266.016	829.237	431.48
435	4.34	529.846	1293.39	213.036	562.488	1286.51	146.119	564.255	1286.82	281.554	664.75	1111.9	63.1328	690.007	1113.11	361.751	593.236	1062.15	215.284	704.911	774.966	-91.2729	439.265	843.927	-114.294	443.908	848.652	-36.7804	358.389	864.817	-69.3847	263.632	834.192	-68.395	696.705	770.625	505.99	427.836	846.065	479.692	450.626	845.312	401.128	372.167	873.609	432.779	266.009	829.202	431.489
436	4.35	529.811	1293.38	213.05	562.404	1286.49	146.159	564.245	1286.82	281.571	664.726	1111.88	63.1347	689.951	1113.11	361.757	593.186	1062.15	215.285	704.92	774.957	-91.2852	439.277	843.923	-114.288	443.887	848.648	-36.7681	358.35	864.813	-69.3589	263.611	834.18	-68.3897	696.703	770.639	505.999	427.791	846.067	479.686	450.57	845.327	401.133	372.129	873.615	432.785	265.988	829.191	431.507
437	4.36	529.713	1293.38	213.091	562.438	1286.47	146.156	564.236	1286.78	281.557	664.712	1111.88	63.1383	689.931	1113.11	361.766	593.228	1062.12	215.28	704.908	774.968	-91.2728	439.257	843.901	-114.26	443.885	848.622	-36.7526	358.355	864.798	-69.3467	263.599	834.176	-68.3823	696.689	770.636	505.982	427.754	846.056	479.689	450.584	845.312	401.156	372.117	873.616	432.793	265.932	829.211	431.515
438	4.37	529.754	1293.33	213.104	562.51	1286.44	146.145	564.255	1286.72	281.55	664.724	1111.86	63.1385	689.969	1113.1	361.754	593.309	1062.05	215.273	704.902	774.966	-91.2714	439.26	843.868	-114.281	443.922	848.589	-36.7746	358.42	864.76	-69.3756	263.548	834.197	-68.3622	696.677	770.617	505.996	427.767	846.048	479.687	450.618	845.273	401.135	372.149	873.598	432.788	265.901	829.202	431.513
439	4.38	529.872	1293.26	213.062	562.562	1286.4	146.124	564.267	1286.68	281.539	664.747	1111.85	63.1294	689.997	1113.06	361.733	593.368	1061.99	215.245	704.927	774.979	-91.2772	439.285	843.849	-114.313	443.948	848.561	-36.8143	358.455	864.731	-69.3972	263.574	834.191	-68.37	696.681	770.625	506.016	427.785	846.034	479.676	450.6	845.236	401.096	372.158	873.598	432.778	265.997	829.191	431.49
440	4.39	529.892	1293.26	213.041	562.613	1286.4	146.083	564.229	1286.67	281.523	664.749	1111.86	63.1291	689.991	1113.09	361.735	593.399	1061.98	215.21	704.946	774.981	-91.2543	439.312	843.843	-114.346	443.944	848.561	-36.8207	358.43	864.729	-69.4192	263.602	834.187	-68.3814	696.667	770.624	505.992	427.773	846.028	479.657	450.567	845.233	401.072	372.134	873.603	432.773	266.054	829.176	431.477
441	4.4	529.892	1293.3	213.039	562.61	1286.42	146.078	564.23	1286.71	281.506	664.759	1111.88	63.1138	689.997	1113.08	361.719	593.409	1062.01	215.2	704.927	774.989	-91.2459	439.31	843.841	-114.339	443.959	848.582	-36.8234	358.424	864.758	-69.4417	263.603	834.194	-68.3777	696.689	770.632	505.974	427.771	846.033	479.649	450.563	845.272	401.08	372.133	873.613	432.778	266.018	829.201	431.47
442	4.41	529.871	1293.35	213.078	562.577	1286.47	146.122	564.229	1286.78	281.537	664.784	1111.9	63.1109	690.016	1113.1	361.728	593.366	1062.09	215.233	704.953	775.009	-91.2578	439.289	843.886	-114.329	443.951	848.617	-36.8062	358.4	864.807	-69.4181	263.646	834.19	-68.4122	696.704	770.631	505.971	427.787	846.056	479.65	450.574	845.327	401.107	372.144	873.618	432.789	266.094	829.185	431.439
443	4.42	529.817	1293.43	213.1	562.51	1286.52	146.173	564.24	1286.85	281.59	664.799	1111.9	63.125	690.017	1113.12	361.725	593.275	1062.18	215.26	704.903	774.984	-91.2611	439.293	843.918	-114.322	443.912	848.664	-36.7901	358.365	864.846	-69.3763	263.677	834.192	-68.4339	696.716	770.637	505.956	427.791	846.083	479.67	450.55	845.384	401.12	372.14	873.622	432.785	266.185	829.158	431.443
444	4.43	529.792	1293.47	213.091	562.556	1286.56	146.155	564.215	1286.89	281.594	664.799	1111.91	63.1214	690.019	1113.13	361.724	593.246	1062.2	215.249	704.891	774.982	-91.2607	439.265	843.928	-114.287	443.919	848.679	-36.7907	358.378	864.857	-69.3757	263.649	834.202	-68.4144	696.718	770.623	505.951	427.78	846.098	479.678	450.563	845.395	401.134	372.124	873.622	432.78	266.106	829.185	431.451
445	4.44	529.836	1293.45	213.072	562.581	1286.56	146.15	564.256	1286.87	281.599	664.817	1111.92	63.1168	690.024	1113.12	361.746	593.317	1062.16	215.253	704.916	774.988	-91.2784	439.263	843.942	-114.276	443.96	848.67	-36.7884	358.396	864.864	-69.373	263.597	834.22	-68.3687	696.746	770.609	505.971	427.784	846.094	479.682	450.603	845.374	401.14	372.127	873.611	432.782	265.933	829.258	431.496
446	4.45	529.942	1293.41	213.067	562.555	1286.55	146.171	564.31	1286.85	281.619	664.816	1111.91	63.1187	690.049	1113.11	361.744	593.349	1062.12	215.259	704.932	774.988	-91.2772	439.264	843.941	-114.262	443.929	848.658	-36.7686	358.438	864.827	-69.3835	263.598	834.236	-68.3554	696.745	770.603	505.966	427.801	846.088	479.687	450.618	845.332	401.133	372.182	873.611	432.789	265.997	829.268	431.503
447	4.46	530.027	1293.35	213.056	562.566	1286.52	146.159	564.335	1286.79	281.592	664.802	1111.88	63.1142	690.046	1113.08	361.731	593.349	1062.06	215.235	704.912	774.966	-91.2661	439.253	843.91	-114.288	443.911	848.629	-36.7725	358.441	864.782	-69.4135	263.61	834.231	-68.364	696.738	770.601	505.961	427.827	846.062	479.683	450.582	845.288	401.109	372.203	873.611	432.79	266.106	829.231	431.49
448	4.47	530.027	1293.31	213.037	562.625	1286.48	146.112	564.362	1286.73	281.546	664.805	1111.86	63.1097	690.035	1113.05	361.711	593.414	1061.97	215.187	704.903	774.948	-91.2722	439.271	843.869	-114.312	443.943	848.594	-36.8198	358.468	864.734	-69.4617	263.646	834.198	-68.427	696.719	770.599	505.956	427.816	846.029	479.665	450.558	845.242	401.064	372.183	873.606	432.773	266.077	829.2	431.471
449	4.48	530.099	1293.3	213.012	562.651	1286.46	146.108	564.393	1286.71	281.55	664.807	1111.84	63.1099	690.056	1113.04	361.718	593.461	1061.92	215.191	704.931	774.956	-91.2749	439.282	843.836	-114.318	443.961	848.549	-36.8519	358.484	864.707	-69.4831	263.7	834.178	-68.4559	696.694	770.586	505.952	427.812	846.008	479.662	450.561	845.226	401.041	372.176	873.602	432.771	266.036	829.185	431.473
450	4.49	530.111	1293.35	213.061	562.626	1286.49	146.176	564.431	1286.75	281.614	664.795	1111.84	63.1285	690.049	1113.05	361.738	593.423	1061.97	215.257	704.929	774.942	-91.2923	439.246	843.838	-114.278	443.948	848.557	-36.8234	358.438	864.718	-69.4157	263.678	834.18	-68.4137	696.711	770.579	505.961	427.812	846.011	479.679	450.567	845.233	401.076	372.175	873.596	432.795	266.047	829.186	431.504
451	4.5	530.08	1293.44	213.143	562.593	1286.53	146.231	564.417	1286.83	281.663	664.806	1111.86	63.1446	690.034	1113.07	361.758	593.381	1062.06	215.302	704.9	774.917	-91.3142	439.245	843.873	-114.253	443.923	848.583	-36.7876	358.367	864.764	-69.3602	263.623	834.196	-68.3731	696.716	770.59	505.968	427.812	846.018	479.7	450.61	845.265	401.14	372.16	873.594	432.805	266.088	829.136	431.511
452	4.51	529.961	1293.54	213.135	562.578	1286.58	146.231	564.435	1286.88	281.661	664.821	1111.85	63.1406	690.026	1113.09	361.767	593.323	1062.14	215.305	704.889	774.936	-91.3076	439.246	843.9	-114.259	443.899	848.625	-36.7778	358.362	864.795	-69.3531	263.599	834.177	-68.3895	696.7	770.601	505.963	427.783	846.029	479.694	450.634	845.305	401.16	372.154	873.59	432.795	266.038	829.151	431.469
453	4.52	529.933	1293.59	213.123	562.633	1286.62	146.209	564.462	1286.92	281.655	664.81	1111.86	63.1483	690.066	1113.11	361.765	593.308	1062.16	215.296	704.899	774.978	-91.303	439.233	843.92	-114.262	443.917	848.647	-36.7765	358.387	864.817	-69.3452	263.6	834.186	-68.3981	696.691	770.603	505.957	427.773	846.053	479.682	450.645	845.314	401.176	372.127	873.606	432.805	266.019	829.152	431.454
454	4.53	529.937	1293.6	213.151	562.642	1286.65	146.21	564.483	1286.96	281.665	664.82	1111.88	63.1577	690.076	1113.12	361.784	593.33	1062.17	215.319	704.888	774.976	-91.2888	439.25	843.932	-114.272	443.916	848.663	-36.7571	358.359	864.846	-69.3293	263.591	834.184	-68.3549	696.712	770.605	505.95	427.806	846.071	479.693	450.658	845.318	401.179	372.142	873.614	432.793	266.022	829.185	431.488
455	4.54	529.965	1293.58	213.138	562.626	1286.64	146.199	564.472	1286.96	281.652	664.821	1111.88	63.1584	690.053	1113.12	361.781	593.347	1062.15	215.326	704.88	774.972	-91.3118	439.258	843.933	-114.282	443.918	848.661	-36.7656	358.358	864.844	-69.3489	263.578	834.196	-68.3392	696.729	770.612	505.953	427.816	846.083	479.681	450.653	845.322	401.171	372.179	873.621	432.789	265.965	829.249	431.522
456	4.55	529.988	1293.56	213.099	562.668	1286.62	146.156	564.469	1286.94	281.612	664.802	1111.87	63.151	690.071	1113.11	361.754	593.334	1062.09	215.299	704.918	774.99	-91.3137	439.277	843.915	-114.319	443.934	848.627	-36.8019	358.407	864.814	-69.395	263.584	834.213	-68.3886	696.739	770.625	505.947	427.797	846.075	479.659	450.637	845.296	401.128	372.159	873.624	432.798	265.946	829.297	431.497
457	4.56	530.105	1293.52	213.058	562.752	1286.59	146.112	564.46	1286.89	281.579	664.823	1111.86	63.1388	690.082	1113.08	361.738	593.411	1062.01	215.244	704.947	775	-91.2843	439.33	843.884	-114.35	443.988	848.597	-36.8397	358.446	864.776	-69.4439	263.611	834.225	-68.4066	696.726	770.616	505.946	427.799	846.064	479.649	450.625	845.266	401.086	372.151	873.626	432.783	265.989	829.281	431.475
458	4.57	530.165	1293.49	213.037	562.803	1286.56	146.104	564.474	1286.88	281.592	664.822	1111.85	63.1428	690.098	1113.07	361.751	593.487	1061.96	215.236	704.953	774.986	-91.2629	439.322	843.878	-114.335	444.019	848.581	-36.8469	358.441	864.768	-69.4565	263.566	834.236	-68.3737	696.724	770.603	505.969	427.829	846.055	479.664	450.619	845.256	401.077	372.175	873.61	432.771	266.061	829.218	431.479
459	4.58	530.152	1293.51	213.052	562.74	1286.57	146.118	564.471	1286.87	281.607	664.813	1111.85	63.156	690.082	1113.08	361.754	593.476	1061.96	215.248	704.937	774.971	-91.2584	439.308	843.871	-114.331	443.996	848.587	-36.843	358.417	864.782	-69.4478	263.596	834.234	-68.3866	696.757	770.597	505.983	427.836	846.052	479.672	450.618	845.252	401.088	372.181	873.608	432.781	265.994	829.235	431.489
460	4.59	530.084	1293.54	213.073	562.675	1286.59	146.165	564.418	1286.91	281.628	664.818	1111.86	63.1628	690.046	1113.07	361.773	593.375	1062	215.26	704.947	774.99	-91.2585	439.276	843.881	-114.307	443.953	848.603	-36.8236	358.406	864.792	-69.439	263.614	834.205	-68.3864	696.754	770.592	505.991	427.811	846.045	479.676	450.594	845.273	401.108	372.146	873.61	432.781	265.986	829.235	431.487
461	4.6	529.971	1293.55	213.129	562.675	1286.61	146.204	564.429	1286.94	281.652	664.844	1111.87	63.1742	690.043	1113.08	361.796	593.341	1062.04	215.291	704.949	775	-91.2306	439.279	843.897	-114.288	443.93	848.629	-36.7844	358.409	864.793	-69.3924	263.568	834.195	-68.3633	696.736	770.607	506.004	427.787	846.049	479.689	450.59	845.31	401.138	372.126	873.605	432.78	266.026	829.206	431.488
462	4.61	529.979	1293.58	213.155	562.695	1286.63	146.217	564.408	1286.97	281.673	664.867	1111.88	63.1793	690.048	1113.09	361.824	593.341	1062.06	215.334	704.948	774.997	-91.2187	439.273	843.907	-114.269	443.913	848.658	-36.7538	358.372	864.826	-69.349	263.574	834.22	-68.3538	696.733	770.615	506.022	427.807	846.056	479.714	450.594	845.331	401.153	372.133	873.606	432.792	265.971	829.233	431.537
463	4.62	529.975	1293.57	213.154	562.665	1286.63	146.246	564.377	1287	281.681	664.86	1111.88	63.1797	690.044	1113.09	361.833	593.333	1062.09	215.343	704.95	775.001	-91.2048	439.282	843.901	-114.28	443.894	848.668	-36.7405	358.361	864.84	-69.3464	263.522	834.233	-68.3361	696.704	770.611	506.027	427.799	846.066	479.734	450.589	845.362	401.164	372.106	873.601	432.803	265.958	829.232	431.526
464	4.63	529.957	1293.58	213.148	562.616	1286.62	146.242	564.39	1286.98	281.668	664.826	1111.88	63.1778	690.018	1113.1	361.833	593.285	1062.11	215.327	704.938	774.99	-91.2246	439.262	843.914	-114.268	443.892	848.662	-36.7433	358.336	864.845	-69.3564	263.556	834.199	-68.3535	696.691	770.614	506.021	427.767	846.065	479.714	450.572	845.36	401.161	372.107	873.601	432.804	265.879	829.251	431.532
465	4.64	529.983	1293.54	213.127	562.641	1286.59	146.224	564.408	1286.94	281.643	664.845	1111.89	63.1766	690.012	1113.1	361.815	593.324	1062.08	215.305	704.94	775.004	-91.2643	439.25	843.904	-114.277	443.899	848.631	-36.7571	358.393	864.817	-69.376	263.595	834.206	-68.3706	696.681	770.624	506.026	427.789	846.072	479.697	450.581	845.334	401.153	372.119	873.608	432.796	265.947	829.24	431.504
466	4.65	530.011	1293.51	213.102	562.726	1286.59	146.192	564.445	1286.91	281.623	664.861	1111.89	63.1727	690.055	1113.08	361.775	593.354	1062.04	215.286	704.962	775.01	-91.2644	439.293	843.886	-114.305	443.951	848.6	-36.7928	358.434	864.802	-69.3965	263.642	834.22	-68.397	696.688	770.632	506.046	427.812	846.068	479.693	450.626	845.3	401.134	372.13	873.628	432.791	266.034	829.223	431.488
467	4.66	530.063	1293.5	213.07	562.699	1286.61	146.183	564.423	1286.87	281.585	664.862	1111.88	63.1624	690.069	1113.08	361.757	593.379	1062.01	215.264	704.951	774.989	-91.2889	439.308	843.878	-114.333	443.966	848.597	-36.836	358.441	864.788	-69.4165	263.625	834.231	-68.4157	696.674	770.625	506.027	427.805	846.073	479.68	450.658	845.285	401.129	372.142	873.624	432.791	265.975	829.257	431.512
468	4.67	530.006	1293.52	213.054	562.732	1286.59	146.116	564.429	1286.83	281.56	664.867	1111.87	63.1275	690.057	1113.07	361.735	593.406	1061.98	215.213	704.945	775.013	-91.3059	439.308	843.887	-114.362	443.98	848.605	-36.8732	358.427	864.783	-69.4601	263.654	834.252	-68.462	696.648	770.609	505.996	427.788	846.068	479.663	450.658	845.283	401.114	372.133	873.625	432.773	265.935	829.269	431.504
469	4.68	530.043	1293.53	213.039	562.804	1286.58	146.062	564.423	1286.83	281.549	664.879	1111.86	63.1142	690.116	1113.07	361.706	593.436	1061.96	215.181	704.958	775.015	-91.3418	439.3	843.901	-114.374	444.006	848.615	-36.882	358.459	864.786	-69.4728	263.682	834.238	-68.4796	696.667	770.601	505.994	427.804	846.064	479.649	450.703	845.252	401.11	372.154	873.638	432.765	265.995	829.258	431.48
470	4.69	530.119	1293.54	213.019	562.814	1286.58	146.078	564.442	1286.86	281.546	664.908	1111.87	63.1169	690.139	1113.07	361.696	593.48	1061.95	215.18	704.935	774.991	-91.3442	439.306	843.917	-114.369	444.042	848.604	-36.8801	358.472	864.789	-69.459	263.676	834.237	-68.457	696.702	770.607	505.995	427.824	846.086	479.651	450.706	845.267	401.113	372.172	873.636	432.769	266.097	829.213	431.443
471	4.7	530.029	1293.58	213.05	562.78	1286.59	146.092	564.454	1286.88	281.548	664.905	1111.88	63.1046	690.134	1113.08	361.712	593.452	1061.99	215.187	704.945	774.997	-91.3613	439.268	843.931	-114.358	444.014	848.626	-36.8701	358.445	864.802	-69.4325	263.665	834.247	-68.4255	696.718	770.618	505.971	427.825	846.097	479.652	450.671	845.296	401.117	372.166	873.625	432.759	265.991	829.256	431.475
472	4.71	529.985	1293.62	213.082	562.683	1286.63	146.127	564.438	1286.93	281.565	664.887	1111.87	63.1106	690.116	1113.08	361.725	593.345	1062.06	215.218	705.007	775.032	-91.3791	439.27	843.938	-114.347	443.946	848.673	-36.8188	358.392	864.828	-69.401	263.675	834.24	-68.4373	696.73	770.615	505.965	427.83	846.087	479.666	450.661	845.328	401.139	372.177	873.615	432.766	266.019	829.241	431.483
473	4.72	529.961	1293.65	213.12	562.649	1286.64	146.17	564.479	1286.96	281.603	664.9	1111.87	63.1229	690.125	1113.09	361.727	593.305	1062.08	215.261	704.998	775.042	-91.3832	439.271	843.951	-114.31	443.931	848.705	-36.7724	358.386	864.845	-69.3589	263.68	834.231	-68.4271	696.757	770.621	505.961	427.852	846.078	479.698	450.629	845.35	401.16	372.195	873.608	432.787	266.075	829.176	431.486
474	4.73	530.008	1293.62	213.134	562.681	1286.63	146.18	564.518	1286.93	281.647	664.89	1111.86	63.1363	690.127	1113.1	361.743	593.413	1062.01	215.285	704.948	775.023	-91.3907	439.269	843.939	-114.269	443.924	848.69	-36.7598	358.394	864.833	-69.3322	263.607	834.244	-68.3739	696.754	770.61	505.961	427.878	846.054	479.725	450.644	845.336	401.175	372.18	873.58	432.794	266.05	829.169	431.546
475	4.74	530.043	1293.57	213.115	562.703	1286.61	146.141	564.49	1286.93	281.615	664.872	1111.86	63.1257	690.11	1113.1	361.734	593.472	1061.94	215.263	704.922	774.997	-91.3923	439.243	843.921	-114.282	443.88	848.658	-36.7675	358.407	864.804	-69.3463	263.568	834.231	-68.3542	696.735	770.607	505.947	427.873	846.036	479.711	450.662	845.299	401.167	372.169	873.574	432.804	266.007	829.167	431.567
476	4.75	530.044	1293.54	213.082	562.707	1286.59	146.118	564.481	1286.89	281.567	664.87	1111.85	63.1042	690.115	1113.08	361.72	593.469	1061.91	215.215	704.926	774.986	-91.3801	439.243	843.887	-114.306	443.894	848.611	-36.7975	358.403	864.781	-69.3893	263.539	834.216	-68.3588	696.737	770.615	505.932	427.833	846.024	479.685	450.629	845.263	401.112	372.153	873.583	432.797	265.988	829.177	431.538
477	4.76	530.043	1293.52	213.043	562.758	1286.59	146.066	564.497	1286.86	281.536	664.877	1111.84	63.0911	690.123	1113.07	361.689	593.467	1061.9	215.193	704.942	774.984	-91.3619	439.262	843.864	-114.306	443.933	848.605	-36.8184	358.417	864.78	-69.4103	263.629	834.202	-68.3804	696.728	770.6	505.935	427.826	846.029	479.676	450.616	845.258	401.094	372.176	873.608	432.789	266.06	829.193	431.511
478	4.77	530.044	1293.54	213.015	562.802	1286.59	146.028	564.48	1286.87	281.51	664.859	1111.85	63.0776	690.137	1113.07	361.671	593.465	1061.91	215.171	704.941	775.001	-91.3721	439.252	843.878	-114.311	443.972	848.617	-36.8435	358.443	864.783	-69.419	263.646	834.225	-68.4007	696.724	770.609	505.925	427.818	846.041	479.662	450.61	845.26	401.094	372.187	873.612	432.784	266.125	829.202	431.474
479	4.78	530.04	1293.62	212.969	562.808	1286.6	146.005	564.447	1286.93	281.472	664.862	1111.87	63.0647	690.143	1113.08	361.672	593.45	1061.97	215.162	704.932	774.987	-91.3832	439.268	843.909	-114.328	443.998	848.63	-36.8633	358.445	864.804	-69.4376	263.606	834.279	-68.3965	696.733	770.631	505.91	427.816	846.085	479.649	450.592	845.289	401.092	372.186	873.627	432.771	266.023	829.262	431.483
480	4.79	529.984	1293.68	212.953	562.809	1286.64	145.989	564.461	1286.97	281.468	664.859	1111.89	63.064	690.147	1113.11	361.659	593.402	1062.03	215.164	704.902	774.951	-91.3844	439.306	843.911	-114.343	443.996	848.654	-36.8645	358.414	864.844	-69.4412	263.603	834.289	-68.406	696.732	770.639	505.907	427.833	846.109	479.647	450.607	845.316	401.115	372.176	873.635	432.763	266.005	829.278	431.495
481	4.8	530.017	1293.73	212.958	562.824	1286.67	146.001	564.476	1287.02	281.487	664.856	1111.89	63.0641	690.143	1113.11	361.657	593.423	1062.05	215.167	704.861	774.944	-91.3654	439.296	843.929	-114.338	443.982	848.684	-36.8554	358.447	864.867	-69.4248	263.672	834.265	-68.4372	696.74	770.651	505.928	427.851	846.123	479.663	450.596	845.351	401.119	372.161	873.656	432.779	266.045	829.278	431.464
482	4.81	530.001	1293.76	212.966	562.844	1286.67	145.979	564.496	1287.05	281.494	664.844	1111.9	63.0653	690.103	1113.11	361.654	593.421	1062.08	215.173	704.863	774.938	-91.3577	439.324	843.938	-114.334	443.995	848.689	-36.842	358.434	864.858	-69.4107	263.658	834.255	-68.445	696.741	770.663	505.931	427.836	846.124	479.678	450.61	845.377	401.112	372.148	873.655	432.783	266.088	829.25	431.46
483	4.82	529.926	1293.76	212.963	562.828	1286.68	145.956	564.46	1287.08	281.499	664.804	1111.89	63.0626	690.063	1113.13	361.669	593.367	1062.11	215.181	704.874	774.932	-91.3569	439.284	843.954	-114.317	443.966	848.684	-36.8268	358.419	864.848	-69.4039	263.591	834.238	-68.3884	696.699	770.649	505.923	427.794	846.114	479.673	450.619	845.379	401.135	372.129	873.648	432.777	265.929	829.28	431.505
484	4.83	529.923	1293.73	212.948	562.782	1286.66	145.966	564.392	1287.08	281.503	664.808	1111.86	63.0697	690.022	1113.12	361.691	593.336	1062.09	215.209	704.886	774.923	-91.352	439.277	843.928	-114.299	443.917	848.663	-36.7972	358.407	864.834	-69.3757	263.613	834.195	-68.3779	696.672	770.615	505.937	427.781	846.092	479.667	450.62	845.375	401.162	372.108	873.619	432.776	265.858	829.277	431.529
485	4.84	529.941	1293.69	212.977	562.737	1286.63	146.013	564.413	1287.01	281.476	664.804	1111.84	63.0933	690.01	1113.09	361.691	593.412	1062.01	215.24	704.913	774.917	-91.3346	439.316	843.868	-114.307	443.922	848.622	-36.7716	358.414	864.797	-69.3584	263.628	834.181	-68.3611	696.687	770.629	505.967	427.794	846.056	479.685	450.641	845.339	401.15	372.115	873.597	432.787	265.982	829.19	431.535
486	4.85	530.02	1293.59	212.962	562.791	1286.57	145.983	564.437	1286.93	281.47	664.789	1111.82	63.1068	690.028	1113.06	361.685	593.466	1061.92	215.233	704.917	774.933	-91.3224	439.327	843.83	-114.311	443.933	848.574	-36.7796	358.441	864.751	-69.3731	263.632	834.187	-68.3669	696.714	770.632	505.979	427.792	846.012	479.686	450.633	845.275	401.128	372.123	873.573	432.79	265.981	829.165	431.522
487	4.86	530.078	1293.48	212.882	562.847	1286.51	145.916	564.44	1286.84	281.413	664.791	1111.79	63.1002	690.01	1113.02	361.664	593.489	1061.84	215.184	704.942	774.952	-91.335	439.305	843.826	-114.321	443.966	848.536	-36.8286	358.453	864.715	-69.4152	263.621	834.177	-68.3924	696.71	770.623	505.973	427.791	845.997	479.674	450.633	845.217	401.087	372.154	873.563	432.775	266.004	829.153	431.472
488	4.87	530.149	1293.43	212.823	562.878	1286.46	145.852	564.435	1286.79	281.373	664.786	1111.78	63.0833	690.022	1113.02	361.641	593.5	1061.81	215.143	704.926	774.93	-91.3597	439.294	843.819	-114.346	443.958	848.534	-36.8455	358.454	864.716	-69.4467	263.599	834.197	-68.3987	696.721	770.625	505.969	427.821	845.996	479.652	450.628	845.183	401.066	372.182	873.574	432.769	266.068	829.156	431.463
489	4.88	530.178	1293.45	212.808	562.896	1286.46	145.838	564.415	1286.82	281.354	664.8	1111.8	63.0875	690.031	1113.04	361.63	593.5	1061.84	215.133	704.937	774.928	-91.3619	439.319	843.843	-114.374	443.983	848.569	-36.8546	358.473	864.747	-69.4608	263.644	834.2	-68.4247	696.734	770.637	505.964	427.843	846.029	479.658	450.636	845.197	401.065	372.19	873.592	432.766	266.145	829.196	431.478
490	4.89	530.062	1293.55	212.835	562.782	1286.54	145.89	564.387	1286.91	281.368	664.817	1111.83	63.087	690.044	1113.08	361.638	593.46	1061.94	215.145	704.928	774.929	-91.3391	439.312	843.881	-114.368	443.98	848.629	-36.853	358.445	864.8	-69.4525	263.703	834.214	-68.4352	696.733	770.635	505.953	427.852	846.061	479.654	450.633	845.25	401.082	372.22	873.605	432.753	266.166	829.243	431.471
491	4.9	529.969	1293.68	212.861	562.638	1286.64	145.934	564.319	1287	281.4	664.806	1111.87	63.0652	690.034	1113.11	361.658	593.304	1062.09	215.167	704.945	774.951	-91.3376	439.271	843.936	-114.352	443.935	848.705	-36.8184	358.397	864.866	-69.4214	263.682	834.223	-68.4231	696.718	770.633	505.942	427.842	846.099	479.649	450.638	845.333	401.124	372.229	873.632	432.747	266.123	829.262	431.458
492	4.91	529.828	1293.75	212.915	562.54	1286.68	146.005	564.278	1287.08	281.467	664.796	1111.89	63.0754	690.013	1113.13	361.677	593.233	1062.19	215.201	704.964	774.981	-91.3561	439.249	843.963	-114.319	443.912	848.762	-36.7827	358.37	864.911	-69.3864	263.638	834.232	-68.3773	696.718	770.63	505.936	427.832	846.112	479.658	450.629	845.396	401.165	372.236	873.643	432.759	266.039	829.286	431.481
493	4.92	529.835	1293.68	212.962	562.545	1286.68	146.047	564.297	1287.07	281.513	664.789	1111.9	63.1008	689.992	1113.13	361.692	593.315	1062.15	215.232	704.967	774.992	-91.3645	439.249	843.963	-114.304	443.919	848.756	-36.7731	358.406	864.903	-69.3709	263.638	834.235	-68.3546	696.732	770.629	505.959	427.846	846.111	479.686	450.616	845.408	401.168	372.216	873.654	432.78	266.095	829.233	431.479
494	4.93	529.863	1293.62	212.958	562.604	1286.64	146.02	564.285	1287	281.501	664.769	1111.9	63.1083	689.983	1113.11	361.676	593.349	1062.06	215.209	704.952	775.019	-91.3639	439.249	843.932	-114.322	443.936	848.703	-36.8078	358.418	864.869	-69.3967	263.619	834.256	-68.359	696.725	770.636	505.954	427.829	846.105	479.676	450.621	845.383	401.126	372.163	873.643	432.777	266.103	829.227	431.455
495	4.94	529.88	1293.54	212.96	562.634	1286.55	145.98	564.27	1286.89	281.468	664.769	1111.88	63.0968	689.964	1113.07	361.667	593.412	1061.95	215.17	704.957	775.039	-91.3659	439.236	843.902	-114.336	443.964	848.633	-36.8441	358.424	864.818	-69.4337	263.553	834.252	-68.3413	696.711	770.63	505.924	427.808	846.079	479.657	450.629	845.315	401.101	372.133	873.621	432.772	266.038	829.203	431.48
496	4.95	529.958	1293.39	212.979	562.646	1286.48	146.005	564.263	1286.82	281.482	664.751	1111.85	63.1083	690.005	1113.04	361.692	593.492	1061.84	215.177	704.935	775.028	-91.3496	439.271	843.862	-114.318	443.969	848.583	-36.8452	358.452	864.769	-69.4288	263.566	834.222	-68.3408	696.701	770.618	505.934	427.808	846.061	479.686	450.638	845.244	401.108	372.117	873.61	432.781	265.966	829.205	431.526
497	4.96	529.974	1293.33	213.026	562.639	1286.44	146.064	564.268	1286.78	281.524	664.739	1111.84	63.1256	690.01	1113.03	361.702	593.546	1061.8	215.215	704.933	775.023	-91.3324	439.275	843.849	-114.308	444.001	848.548	-36.849	358.497	864.728	-69.4177	263.594	834.218	-68.3357	696.689	770.6	505.962	427.82	846.047	479.702	450.604	845.227	401.097	372.109	873.606	432.805	265.961	829.203	431.523
498	4.97	529.97	1293.32	213.014	562.611	1286.45	146.071	564.229	1286.77	281.529	664.715	1111.84	63.1235	689.986	1113.02	361.698	593.514	1061.83	215.214	704.942	775.028	-91.3568	439.288	843.836	-114.334	443.995	848.56	-36.84	358.468	864.736	-69.4222	263.62	834.193	-68.358	696.702	770.588	505.966	427.796	846.033	479.691	450.587	845.237	401.081	372.102	873.607	432.808	266.031	829.174	431.497
499	4.98	529.923	1293.36	213.036	562.527	1286.49	146.097	564.172	1286.8	281.548	664.702	1111.84	63.1144	689.978	1113.02	361.716	593.424	1061.89	215.217	704.915	775.011	-91.3825	439.275	843.849	-114.343	443.932	848.585	-36.8303	358.423	864.757	-69.4308	263.62	834.184	-68.3785	696.697	770.579	505.925	427.778	846.036	479.686	450.588	845.262	401.107	372.061	873.599	432.793	266.015	829.177	431.492
500	4.99	529.847	1293.41	213.096	562.46	1286.52	146.183	564.205	1286.85	281.6	664.727	1111.85	63.1378	689.984	1113.03	361.729	593.412	1061.94	215.252	704.935	775.015	-91.3751	439.256	843.879	-114.299	443.903	848.624	-36.8	358.383	864.785	-69.399	263.603	834.194	-68.3612	696.724	770.583	505.921	427.807	846.045	479.703	450.591	845.317	401.147	372.07	873.595	432.798	265.946	829.189	431.513
501	5	529.797	1293.48	213.155	562.415	1286.55	146.258	564.225	1286.89	281.68	664.753	1111.87	63.1807	690.009	1113.05	361.757	593.403	1061.99	215.307	704.938	775.024	-91.3694	439.274	843.905	-114.266	443.925	848.644	-36.7753	358.37	864.822	-69.3435	263.615	834.196	-68.343	696.73	770.565	505.935	427.839	846.071	479.728	450.592	845.357	401.168	372.099	873.607	432.827	265.977	829.189	431.525
502	5.01	529.771	1293.52	213.152	562.438	1286.56	146.267	564.266	1286.89	281.694	664.754	1111.87	63.178	690.03	1113.05	361.758	593.401	1062.01	215.294	704.932	775.038	-91.3704	439.29	843.92	-114.288	443.907	848.649	-36.7756	358.383	864.842	-69.3466	263.603	834.216	-68.3311	696.711	770.547	505.928	427.821	846.079	479.71	450.603	845.365	401.151	372.115	873.631	432.822	266.018	829.208	431.498
503	5.02	529.79	1293.51	213.128	562.464	1286.56	146.224	564.246	1286.88	281.65	664.75	1111.88	63.1532	690.018	1113.04	361.755	593.385	1062.01	215.237	704.926	775.06	-91.3784	439.28	843.929	-114.324	443.912	848.652	-36.797	358.388	864.84	-69.407	263.628	834.223	-68.3853	696.705	770.555	505.906	427.8	846.087	479.674	450.572	845.364	401.1	372.114	873.632	432.794	266.055	829.207	431.459
504	5.03	529.832	1293.5	213.128	562.475	1286.55	146.225	564.245	1286.89	281.653	664.774	1111.89	63.1512	690.041	1113.04	361.763	593.398	1061.99	215.231	704.985	775.07	-91.3696	439.263	843.924	-114.331	443.956	848.648	-36.8169	358.428	864.825	-69.4379	263.683	834.235	-68.4209	696.731	770.554	505.883	427.812	846.096	479.667	450.545	845.342	401.076	372.141	873.645	432.789	266.088	829.222	431.442
505	5.04	529.83	1293.54	213.157	562.515	1286.55	146.233	564.27	1286.9	281.654	664.788	1111.89	63.1819	690.073	1113.03	361.774	593.436	1061.98	215.268	705.009	775.066	-91.3579	439.289	843.906	-114.336	443.988	848.648	-36.8362	358.452	864.82	-69.4402	263.657	834.26	-68.4245	696.757	770.542	505.879	427.85	846.091	479.675	450.56	845.327	401.074	372.189	873.65	432.796	266.127	829.239	431.447
506	5.05	529.923	1293.53	213.152	562.531	1286.58	146.246	564.256	1286.89	281.663	664.788	1111.89	63.188	690.068	1113.04	361.782	593.459	1061.97	215.268	704.986	775.08	-91.37	439.314	843.907	-114.359	443.991	848.656	-36.8541	358.421	864.829	-69.4435	263.68	834.25	-68.4428	696.755	770.536	505.884	427.848	846.087	479.682	450.562	845.325	401.071	372.194	873.644	432.794	266.062	829.27	431.471
507	5.06	530.026	1293.48	213.155	562.532	1286.58	146.272	564.292	1286.86	281.685	664.793	1111.89	63.196	690.08	1113.02	361.767	593.464	1061.96	215.262	704.983	775.084	-91.3585	439.313	843.906	-114.352	443.982	848.642	-36.852	358.44	864.813	-69.4428	263.682	834.245	-68.4361	696.771	770.535	505.902	427.838	846.074	479.677	450.605	845.306	401.094	372.185	873.632	432.788	266.024	829.253	431.478
508	5.07	530.016	1293.47	213.191	562.542	1286.57	146.326	564.362	1286.85	281.721	664.817	1111.88	63.2128	690.102	1112.99	361.77	593.534	1061.91	215.281	704.981	775.073	-91.3408	439.286	843.893	-114.339	443.975	848.624	-36.8284	358.494	864.777	-69.4389	263.645	834.225	-68.4128	696.775	770.525	505.914	427.857	846.045	479.684	450.658	845.284	401.11	372.196	873.605	432.791	266.103	829.201	431.48
509	5.08	530.067	1293.47	213.198	562.612	1286.57	146.344	564.418	1286.86	281.767	664.827	1111.87	63.2373	690.082	1112.99	361.821	593.533	1061.93	215.346	705.018	775.095	-91.3161	439.266	843.89	-114.31	443.983	848.608	-36.8086	358.49	864.762	-69.4023	263.569	834.21	-68.3586	696.729	770.497	505.944	427.868	846.014	479.711	450.688	845.289	401.135	372.168	873.584	432.81	266.093	829.162	431.517
510	5.09	530.085	1293.5	213.235	562.607	1286.58	146.389	564.418	1286.9	281.8	664.811	1111.86	63.2594	690.048	1112.98	361.857	593.493	1061.96	215.39	705.004	775.101	-91.2836	439.247	843.873	-114.281	443.951	848.619	-36.7752	358.444	864.772	-69.3659	263.543	834.198	-68.3228	696.699	770.493	505.967	427.832	846.003	479.732	450.684	845.294	401.172	372.151	873.579	432.826	265.977	829.189	431.53
511	5.1	530.074	1293.53	213.241	562.58	1286.6	146.454	564.405	1286.95	281.819	664.777	1111.87	63.2678	690.038	1112.97	361.856	593.44	1061.97	215.404	704.952	775.091	-91.2763	439.262	843.872	-114.263	443.935	848.626	-36.7447	358.401	864.802	-69.3363	263.535	834.197	-68.3085	696.708	770.506	505.958	427.801	846.012	479.715	450.634	845.312	401.182	372.136	873.586	432.831	265.891	829.182	431.538
512	5.11	529.995	1293.56	213.26	562.614	1286.63	146.445	564.395	1286.95	281.828	664.782	1111.88	63.2706	690.062	1112.99	361.856	593.481	1061.96	215.381	704.946	775.108	-91.2956	439.283	843.864	-114.24	443.947	848.614	-36.7651	358.391	864.804	-69.328	263.556	834.183	-68.3031	696.722	770.515	505.957	427.816	846.032	479.716	450.619	845.32	401.172	372.155	873.618	432.843	265.94	829.15	431.543
513	5.12	529.98	1293.55	213.265	562.677	1286.63	146.386	564.398	1286.93	281.802	664.791	1111.89	63.2674	690.044	1113	361.836	593.524	1061.94	215.358	704.944	775.109	-91.302	439.288	843.878	-114.268	443.999	848.598	-36.8057	358.416	864.783	-69.3894	263.598	834.189	-68.3561	696.702	770.523	505.963	427.81	846.045	479.718	450.592	845.308	401.123	372.114	873.638	432.848	266.022	829.171	431.528
514	5.13	530.005	1293.61	213.259	562.704	1286.65	146.367	564.396	1286.94	281.785	664.775	1111.9	63.2381	690.034	1113.01	361.833	593.462	1061.97	215.327	704.95	775.123	-91.3168	439.256	843.896	-114.292	444.018	848.619	-36.842	358.414	864.791	-69.4381	263.607	834.233	-68.388	696.682	770.521	505.954	427.756	846.075	479.7	450.567	845.304	401.099	372.07	873.646	432.827	265.996	829.235	431.505
515	5.14	529.968	1293.7	213.243	562.689	1286.71	146.387	564.42	1286.99	281.775	664.785	1111.93	63.2204	690.053	1113.03	361.855	593.422	1062.02	215.3	704.953	775.15	-91.3007	439.254	843.911	-114.296	443.969	848.643	-36.8269	358.387	864.815	-69.4339	263.629	834.273	-68.4167	696.681	770.524	505.949	427.746	846.1	479.68	450.525	845.341	401.098	372.085	873.666	432.798	265.909	829.282	431.495
516	5.15	529.967	1293.72	213.256	562.697	1286.75	146.396	564.446	1287.03	281.803	664.802	1111.94	63.2307	690.056	1113.04	361.854	593.402	1062.07	215.315	704.927	775.136	-91.2897	439.269	843.928	-114.298	443.935	848.655	-36.8105	358.388	864.83	-69.4096	263.637	834.257	-68.4145	696.678	770.53	505.944	427.768	846.109	479.677	450.502	845.386	401.104	372.124	873.678	432.794	266.027	829.284	431.467
517	5.16	530.004	1293.72	213.28	562.696	1286.77	146.416	564.459	1287.03	281.85	664.812	1111.92	63.2506	690.07	1113.04	361.863	593.441	1062.07	215.35	704.923	775.115	-91.2897	439.278	843.936	-114.3	443.934	848.665	-36.8054	358.413	864.847	-69.404	263.616	834.251	-68.402	696.68	770.507	505.962	427.788	846.091	479.694	450.563	845.372	401.139	372.127	873.659	432.813	266.101	829.257	431.481
518	5.17	530.061	1293.7	213.301	562.689	1286.76	146.468	564.509	1287.03	281.875	664.828	1111.9	63.261	690.07	1113.03	361.859	593.458	1062.05	215.371	704.936	775.098	-91.2728	439.288	843.943	-114.301	443.947	848.65	-36.7955	358.41	864.834	-69.4015	263.6	834.253	-68.3882	696.701	770.495	505.959	427.79	846.069	479.706	450.602	845.351	401.158	372.102	873.637	432.816	266.002	829.251	431.495
519	5.18	530.093	1293.69	213.309	562.706	1286.72	146.48	564.547	1287.03	281.872	664.855	1111.89	63.2665	690.088	1112.99	361.863	593.454	1062.03	215.391	704.95	775.099	-91.2807	439.283	843.919	-114.294	443.963	848.623	-36.7899	358.412	864.813	-69.3933	263.575	834.232	-68.3443	696.726	770.487	505.951	427.816	846.048	479.708	450.603	845.348	401.149	372.106	873.611	432.808	266.008	829.197	431.493
520	5.19	530.134	1293.66	213.327	562.744	1286.7	146.471	564.595	1286.98	281.887	664.885	1111.88	63.2725	690.132	1112.97	361.863	593.516	1061.99	215.397	704.986	775.095	-91.2707	439.291	843.883	-114.299	443.983	848.607	-36.7812	358.447	864.786	-69.3881	263.632	834.207	-68.3621	696.731	770.47	505.952	427.844	846.033	479.717	450.617	845.324	401.141	372.145	873.587	432.8	266.059	829.159	431.509
521	5.2	530.166	1293.65	213.352	562.813	1286.68	146.447	564.652	1286.95	281.888	664.895	1111.87	63.2758	690.174	1112.97	361.85	593.575	1061.97	215.376	704.976	775.059	-91.2715	439.31	843.857	-114.304	443.991	848.6	-36.8122	358.464	864.765	-69.3978	263.635	834.217	-68.3669	696.766	770.476	505.962	427.86	846.022	479.732	450.656	845.282	401.14	372.173	873.58	432.815	266.065	829.188	431.52
522	5.21	530.219	1293.67	213.321	562.809	1286.68	146.45	564.655	1286.95	281.883	664.888	1111.86	63.2676	690.192	1112.98	361.854	593.615	1061.96	215.36	705.003	775.069	-91.279	439.283	843.869	-114.289	443.991	848.601	-36.816	358.46	864.766	-69.4059	263.574	834.245	-68.3151	696.794	770.485	505.958	427.851	846.021	479.719	450.664	845.255	401.139	372.18	873.596	432.833	266.016	829.229	431.527
523	5.22	530.208	1293.71	213.294	562.871	1286.71	146.437	564.656	1286.96	281.862	664.897	1111.87	63.2558	690.186	1112.99	361.857	593.599	1061.96	215.342	705.019	775.091	-91.2871	439.284	843.873	-114.297	443.988	848.605	-36.8195	358.462	864.774	-69.4128	263.575	834.243	-68.3245	696.782	770.491	505.923	427.838	846.037	479.695	450.645	845.265	401.132	372.156	873.624	432.82	265.977	829.262	431.535
524	5.23	530.19	1293.73	213.282	562.932	1286.76	146.387	564.652	1287	281.842	664.9	1111.88	63.2422	690.167	1113	361.839	593.566	1062.02	215.338	704.998	775.089	-91.3012	439.275	843.903	-114.316	443.975	848.628	-36.8183	358.453	864.794	-69.4275	263.622	834.224	-68.385	696.767	770.505	505.895	427.836	846.05	479.688	450.616	845.302	401.107	372.142	873.626	432.799	266.044	829.238	431.521
525	5.24	530.155	1293.79	213.292	562.866	1286.79	146.396	564.639	1287.07	281.845	664.878	1111.9	63.2387	690.16	1113	361.833	593.494	1062.09	215.347	704.909	775.079	-91.3129	439.281	843.927	-114.318	443.969	848.657	-36.802	358.427	864.829	-69.4083	263.64	834.231	-68.4222	696.749	770.516	505.888	427.825	846.056	479.693	450.579	845.348	401.104	372.134	873.629	432.811	266.018	829.227	431.514
526	5.25	530.08	1293.86	213.321	562.853	1286.81	146.434	564.611	1287.13	281.856	664.865	1111.91	63.247	690.127	1113	361.838	593.422	1062.14	215.376	704.949	775.101	-91.3176	439.285	843.938	-114.301	443.927	848.689	-36.7634	358.396	864.862	-69.3748	263.632	834.219	-68.3838	696.757	770.521	505.884	427.82	846.08	479.698	450.559	845.389	401.136	372.124	873.63	432.816	265.965	829.232	431.519
527	5.26	530.145	1293.84	213.297	562.835	1286.82	146.449	564.622	1287.12	281.861	664.871	1111.91	63.2423	690.154	1113.01	361.833	593.394	1062.14	215.388	705.006	775.101	-91.3234	439.281	843.932	-114.275	443.916	848.67	-36.7516	358.37	864.871	-69.3656	263.616	834.217	-68.3622	696.756	770.51	505.892	427.833	846.091	479.701	450.596	845.393	401.156	372.117	873.636	432.825	265.962	829.222	431.516
528	5.27	530.196	1293.79	213.282	562.828	1286.8	146.414	564.635	1287.07	281.845	664.883	1111.9	63.2343	690.183	1113.01	361.826	593.428	1062.1	215.363	704.989	775.087	-91.3271	439.309	843.904	-114.291	443.931	848.645	-36.7873	358.399	864.836	-69.3998	263.644	834.207	-68.3859	696.749	770.486	505.88	427.83	846.08	479.705	450.636	845.349	401.146	372.11	873.643	432.82	266.02	829.229	431.497
529	5.28	530.19	1293.73	213.254	562.847	1286.76	146.361	564.649	1287.02	281.805	664.874	1111.89	63.2285	690.207	1113	361.828	593.479	1062.03	215.317	704.953	775.073	-91.3228	439.301	843.89	-114.329	443.934	848.624	-36.8245	358.405	864.805	-69.4315	263.682	834.207	-68.4144	696.732	770.49	505.873	427.834	846.056	479.7	450.648	845.287	401.121	372.136	873.65	432.821	266.013	829.264	431.502
530	5.29	530.15	1293.73	213.23	562.894	1286.72	146.324	564.64	1286.98	281.775	664.869	1111.89	63.2149	690.211	1112.98	361.802	593.502	1061.99	215.289	704.948	775.06	-91.301	439.293	843.866	-114.336	443.972	848.589	-36.8572	358.448	864.778	-69.4624	263.664	834.217	-68.3978	696.756	770.494	505.876	427.841	846.046	479.676	450.644	845.253	401.106	372.134	873.639	432.813	266.05	829.246	431.491
531	5.3	530.182	1293.71	213.223	562.922	1286.71	146.302	564.644	1286.98	281.765	664.873	1111.87	63.206	690.196	1112.96	361.78	593.51	1061.98	215.281	704.98	775.043	-91.3108	439.28	843.851	-114.346	443.971	848.571	-36.8473	358.464	864.76	-69.4719	263.676	834.193	-68.4019	696.757	770.483	505.888	427.811	846.041	479.666	450.628	845.246	401.097	372.157	873.62	432.797	266.101	829.218	431.481
532	5.31	530.149	1293.72	213.219	562.87	1286.72	146.328	564.601	1287	281.784	664.894	1111.87	63.2126	690.18	1112.94	361.781	593.538	1061.96	215.299	704.969	775.065	-91.3276	439.307	843.854	-114.339	443.947	848.566	-36.8234	358.43	864.752	-69.4283	263.661	834.193	-68.3985	696.735	770.476	505.897	427.8	846.037	479.687	450.621	845.248	401.111	372.158	873.598	432.806	266.146	829.146	431.479
533	5.32	530.216	1293.73	213.254	562.854	1286.69	146.356	564.636	1286.99	281.823	664.899	1111.87	63.2313	690.169	1112.96	361.791	593.591	1061.93	215.319	704.932	775.064	-91.3666	439.304	843.848	-114.314	443.942	848.568	-36.7891	358.426	864.756	-69.394	263.625	834.207	-68.3578	696.693	770.461	505.913	427.819	846.024	479.715	450.616	845.268	401.128	372.158	873.604	432.824	266.087	829.149	431.504
534	5.33	530.297	1293.71	213.27	562.936	1286.67	146.347	564.627	1287	281.827	664.919	1111.87	63.233	690.166	1112.96	361.797	593.634	1061.93	215.337	704.947	775.045	-91.3647	439.31	843.84	-114.298	443.977	848.569	-36.7906	358.479	864.752	-69.3994	263.574	834.185	-68.3293	696.703	770.452	505.909	427.828	846.032	479.717	450.64	845.295	401.128	372.135	873.61	432.822	266.029	829.163	431.521
535	5.34	530.216	1293.72	213.27	562.983	1286.71	146.322	564.586	1287.05	281.802	664.917	1111.88	63.2143	690.16	1112.97	361.795	593.614	1061.97	215.339	704.98	775.049	-91.3455	439.284	843.859	-114.282	444.013	848.591	-36.8122	358.503	864.769	-69.4046	263.561	834.211	-68.3287	696.739	770.468	505.902	427.831	846.06	479.722	450.636	845.331	401.135	372.079	873.604	432.817	266.029	829.187	431.527
536	5.35	530.105	1293.78	213.237	562.916	1286.79	146.293	564.571	1287.09	281.784	664.887	1111.88	63.2007	690.136	1112.99	361.78	593.54	1062.04	215.313	704.937	775.044	-91.3414	439.265	843.885	-114.288	443.982	848.648	-36.8052	358.462	864.825	-69.4136	263.588	834.252	-68.3708	696.743	770.495	505.898	427.815	846.092	479.717	450.572	845.396	401.106	372.086	873.622	432.811	266.07	829.203	431.517
537	5.36	530.118	1293.82	213.19	562.833	1286.85	146.293	564.541	1287.14	281.764	664.884	1111.9	63.1919	690.12	1113.03	361.777	593.433	1062.14	215.296	704.927	775.051	-91.3509	439.245	843.939	-114.303	443.933	848.725	-36.8048	358.411	864.876	-69.3968	263.594	834.25	-68.3945	696.761	770.52	505.889	427.828	846.114	479.695	450.543	845.431	401.116	372.149	873.651	432.797	266.121	829.232	431.462
538	5.37	530.085	1293.86	213.175	562.808	1286.85	146.291	564.528	1287.16	281.742	664.886	1111.91	63.1846	690.127	1113.06	361.782	593.385	1062.19	215.301	704.97	775.061	-91.3325	439.251	843.967	-114.309	443.914	848.762	-36.795	358.402	864.888	-69.3908	263.567	834.245	-68.353	696.775	770.528	505.881	427.825	846.115	479.674	450.594	845.414	401.145	372.159	873.647	432.788	266.007	829.314	431.482
539	5.38	530.076	1293.83	213.194	562.782	1286.8	146.305	564.522	1287.12	281.742	664.872	1111.9	63.1882	690.151	1113.03	361.778	593.406	1062.15	215.304	704.992	775.033	-91.3179	439.242	843.946	-114.292	443.945	848.715	-36.7921	358.406	864.869	-69.3863	263.583	834.256	-68.3261	696.791	770.524	505.873	427.831	846.101	479.674	450.632	845.352	401.164	372.167	873.636	432.796	266.009	829.333	431.51
540	5.39	530.137	1293.72	213.191	562.793	1286.72	146.274	564.513	1287.01	281.706	664.842	1111.86	63.1891	690.126	1113	361.776	593.492	1062	215.289	704.963	775.029	-91.3142	439.242	843.889	-114.311	443.944	848.641	-36.8156	358.416	864.81	-69.4233	263.572	834.257	-68.3273	696.76	770.506	505.889	427.817	846.064	479.678	450.622	845.268	401.137	372.16	873.617	432.804	266.039	829.292	431.503
541	5.4	530.187	1293.58	213.117	562.846	1286.61	146.195	564.563	1286.88	281.653	664.826	1111.81	63.1857	690.136	1112.94	361.759	593.607	1061.81	215.243	704.953	775.048	-91.3216	439.279	843.827	-114.346	443.989	848.546	-36.855	358.465	864.727	-69.4588	263.568	834.242	-68.3422	696.726	770.48	505.894	427.804	846.031	479.676	450.633	845.19	401.083	372.173	873.598	432.802	266.024	829.231	431.497
542	5.41	530.222	1293.5	213.111	562.908	1286.57	146.168	564.543	1286.83	281.63	664.846	1111.8	63.1878	690.144	1112.92	361.745	593.682	1061.73	215.229	704.972	775.044	-91.3273	439.322	843.772	-114.338	444.023	848.5	-36.8612	358.468	864.687	-69.4513	263.583	834.204	-68.3714	696.742	770.464	505.914	427.8	845.995	479.678	450.643	845.164	401.063	372.158	873.587	432.803	265.975	829.177	431.502
543	5.42	530.088	1293.57	213.174	562.807	1286.61	146.253	564.533	1286.89	281.685	664.848	1111.81	63.2108	690.104	1112.94	361.77	593.557	1061.8	215.288	704.988	775.037	-91.3147	439.268	843.809	-114.29	443.936	848.523	-36.7955	358.43	864.717	-69.3998	263.569	834.197	-68.3526	696.724	770.452	505.926	427.807	845.992	479.706	450.598	845.215	401.099	372.138	873.586	432.816	265.981	829.151	431.514
544	5.43	530.025	1293.65	213.197	562.641	1286.69	146.331	564.512	1286.98	281.745	664.83	1111.84	63.2136	690.064	1112.98	361.806	593.418	1061.93	215.333	704.971	775.018	-91.3102	439.228	843.869	-114.269	443.87	848.589	-36.7412	358.363	864.777	-69.3475	263.552	834.207	-68.2978	696.703	770.454	505.913	427.809	846.024	479.719	450.613	845.291	401.166	372.121	873.591	432.824	265.904	829.152	431.539
545	5.44	529.958	1293.74	213.205	562.615	1286.72	146.339	564.488	1287.05	281.756	664.839	1111.86	63.1999	690.068	1113.01	361.808	593.399	1062.02	215.328	704.963	775.02	-91.3113	439.25	843.894	-114.256	443.899	848.658	-36.7506	358.369	864.822	-69.3572	263.591	834.201	-68.3178	696.714	770.492	505.9	427.819	846.051	479.717	450.651	845.355	401.184	372.115	873.604	432.819	265.867	829.193	431.529
546	5.45	529.985	1293.77	213.208	562.653	1286.73	146.309	564.441	1287.09	281.747	664.846	1111.87	63.1882	690.075	1113.02	361.804	593.407	1062.07	215.313	704.974	775.025	-91.3129	439.291	843.896	-114.28	443.928	848.687	-36.7671	358.395	864.851	-69.3797	263.627	834.184	-68.3626	696.709	770.498	505.879	427.82	846.072	479.699	450.627	845.379	401.175	372.118	873.627	432.816	265.945	829.22	431.506
547	5.46	530.002	1293.75	213.176	562.692	1286.72	146.302	564.434	1287.07	281.738	664.836	1111.88	63.1802	690.1	1113.01	361.797	593.408	1062.04	215.307	704.992	775.021	-91.3065	439.323	843.885	-114.314	443.941	848.671	-36.7797	358.425	864.834	-69.4038	263.602	834.2	-68.3549	696.754	770.507	505.886	427.832	846.086	479.693	450.627	845.369	401.156	372.122	873.636	432.818	266.083	829.222	431.475
548	5.47	530.062	1293.69	213.139	562.736	1286.69	146.255	564.45	1287.01	281.695	664.839	1111.87	63.1684	690.106	1113	361.753	593.436	1061.98	215.261	704.984	775.018	-91.3144	439.32	843.86	-114.348	443.999	848.629	-36.8273	358.438	864.822	-69.4604	263.602	834.202	-68.3736	696.751	770.5	505.87	427.827	846.077	479.674	450.671	845.332	401.127	372.138	873.636	432.799	266.125	829.212	431.427
549	5.48	530.049	1293.67	213.136	562.717	1286.67	146.255	564.456	1286.97	281.675	664.85	1111.86	63.1694	690.12	1113	361.734	593.467	1061.96	215.242	704.979	775.003	-91.3314	439.298	843.866	-114.346	444.031	848.61	-36.8699	358.468	864.79	-69.4687	263.66	834.204	-68.3936	696.753	770.501	505.858	427.819	846.064	479.665	450.645	845.31	401.098	372.18	873.635	432.79	266.158	829.189	431.432
550	5.49	530.017	1293.65	213.179	562.681	1286.65	146.295	564.441	1286.96	281.702	664.864	1111.85	63.1911	690.128	1112.99	361.781	593.45	1061.95	215.28	704.973	774.988	-91.3115	439.287	843.877	-114.315	443.992	848.613	-36.832	358.436	864.786	-69.4305	263.646	834.216	-68.3616	696.774	770.514	505.885	427.837	846.062	479.69	450.609	845.298	401.121	372.193	873.616	432.803	266.106	829.201	431.477
551	5.5	530.05	1293.6	213.206	562.665	1286.62	146.321	564.442	1286.93	281.723	664.869	1111.85	63.2095	690.117	1112.98	361.786	593.48	1061.91	215.304	704.95	774.989	-91.3098	439.247	843.867	-114.292	443.958	848.613	-36.802	358.448	864.77	-69.3992	263.594	834.237	-68.3072	696.773	770.505	505.895	427.852	846.052	479.706	450.597	845.286	401.138	372.171	873.6	432.808	265.995	829.259	431.536
552	5.51	530.07	1293.56	213.182	562.681	1286.59	146.306	564.445	1286.91	281.718	664.884	1111.84	63.1973	690.118	1112.96	361.76	593.531	1061.87	215.272	704.96	774.994	-91.3283	439.271	843.858	-114.317	443.959	848.585	-36.8252	358.461	864.748	-69.4235	263.596	834.244	-68.3057	696.776	770.482	505.881	427.846	846.034	479.688	450.612	845.254	401.099	372.176	873.605	432.805	266	829.257	431.538
553	5.52	530.107	1293.51	213.147	562.71	1286.59	146.29	564.428	1286.88	281.7	664.878	1111.84	63.1661	690.133	1112.94	361.74	593.599	1061.83	215.229	705.006	775.021	-91.3255	439.297	843.855	-114.354	443.991	848.575	-36.8707	358.468	864.74	-69.4521	263.619	834.222	-68.3681	696.77	770.475	505.876	427.835	846.019	479.665	450.616	845.237	401.074	372.186	873.605	432.797	266.096	829.235	431.491
554	5.53	530.076	1293.54	213.175	562.727	1286.63	146.306	564.422	1286.89	281.703	664.887	1111.85	63.1783	690.122	1112.95	361.763	593.604	1061.86	215.237	704.999	775.042	-91.3228	439.315	843.85	-114.335	443.99	848.576	-36.8552	358.481	864.762	-69.4464	263.637	834.242	-68.3779	696.737	770.473	505.876	427.843	846.039	479.67	450.614	845.251	401.082	372.184	873.612	432.789	266.24	829.192	431.459
555	5.54	530.02	1293.61	213.234	562.711	1286.69	146.335	564.46	1286.93	281.747	664.889	1111.87	63.1955	690.12	1112.97	361.801	593.568	1061.92	215.282	705.003	775.056	-91.3272	439.327	843.868	-114.319	443.96	848.616	-36.8158	358.444	864.803	-69.3957	263.641	834.253	-68.3559	696.737	770.48	505.876	427.84	846.06	479.692	450.644	845.293	401.126	372.181	873.627	432.807	266.094	829.248	431.514
556	5.55	529.975	1293.65	213.265	562.674	1286.71	146.385	564.491	1286.98	281.796	664.901	1111.88	63.2059	690.081	1112.99	361.813	593.465	1062.02	215.333	705.004	775.061	-91.3345	439.264	843.911	-114.287	443.915	848.668	-36.7702	358.369	864.846	-69.355	263.553	834.258	-68.3056	696.692	770.458	505.858	427.827	846.059	479.706	450.634	845.341	401.178	372.154	873.614	432.806	266.005	829.235	431.52
557	5.56	529.996	1293.67	213.273	562.598	1286.74	146.443	564.515	1287.01	281.82	664.893	1111.87	63.2226	690.041	1113	361.841	593.373	1062.08	215.38	704.971	775.047	-91.3318	439.225	843.929	-114.242	443.886	848.691	-36.729	358.309	864.881	-69.32	263.561	834.233	-68.3308	696.693	770.44	505.854	427.816	846.053	479.717	450.628	845.364	401.203	372.124	873.584	432.802	266.037	829.15	431.512
558	5.57	530.033	1293.67	213.26	562.62	1286.71	146.445	564.542	1287	281.83	664.889	1111.86	63.2277	690.077	1112.98	361.84	593.41	1062.03	215.367	704.981	775.052	-91.3255	439.223	843.904	-114.249	443.936	848.655	-36.742	358.338	864.854	-69.3221	263.57	834.219	-68.3477	696.726	770.447	505.863	427.835	846.033	479.725	450.636	845.364	401.188	372.12	873.577	432.809	265.99	829.171	431.521
559	5.58	530.154	1293.61	213.241	562.704	1286.65	146.396	564.532	1286.95	281.808	664.899	1111.85	63.2197	690.124	1112.95	361.812	593.509	1061.92	215.316	704.999	775.058	-91.3149	439.239	843.891	-114.283	443.944	848.601	-36.7827	358.429	864.779	-69.3885	263.603	834.206	-68.3473	696.707	770.444	505.865	427.835	846.021	479.715	450.668	845.311	401.143	372.139	873.59	432.814	265.932	829.193	431.495
560	5.59	530.181	1293.58	213.221	562.757	1286.63	146.355	564.531	1286.91	281.778	664.902	1111.84	63.2105	690.134	1112.93	361.774	593.612	1061.84	215.26	705	775.047	-91.325	439.296	843.87	-114.309	443.963	848.574	-36.8224	358.468	864.728	-69.441	263.593	834.207	-68.3251	696.71	770.461	505.863	427.829	846.022	479.696	450.669	845.263	401.1	372.136	873.603	432.823	265.976	829.23	431.49
561	5.6	530.301	1293.58	213.182	562.762	1286.65	146.351	564.502	1286.9	281.752	664.882	1111.85	63.2064	690.167	1112.93	361.77	593.616	1061.82	215.243	704.982	775.067	-91.3347	439.333	843.853	-114.326	444.017	848.567	-36.8431	358.478	864.731	-69.4618	263.581	834.228	-68.3158	696.752	770.471	505.857	427.818	846.041	479.674	450.631	845.248	401.078	372.15	873.625	432.809	265.957	829.282	431.508
562	5.61	530.271	1293.64	213.179	562.835	1286.67	146.335	564.521	1286.93	281.747	664.884	1111.86	63.2015	690.205	1112.94	361.775	593.579	1061.87	215.232	704.992	775.059	-91.3144	439.328	843.844	-114.334	444.061	848.591	-36.8677	358.499	864.74	-69.4913	263.595	834.238	-68.3347	696.773	770.474	505.844	427.811	846.059	479.659	450.638	845.257	401.082	372.153	873.651	432.806	266.01	829.291	431.484
563	5.62	530.156	1293.74	213.201	562.854	1286.72	146.317	564.575	1287	281.771	664.889	1111.88	63.1994	690.214	1112.97	361.783	593.536	1061.95	215.244	704.988	775.055	-91.3148	439.311	843.871	-114.32	444.022	848.632	-36.8583	358.476	864.773	-69.4765	263.577	834.267	-68.3338	696.767	770.491	505.841	427.833	846.079	479.664	450.655	845.286	401.103	372.165	873.656	432.812	266.049	829.282	431.465
564	5.63	530.125	1293.82	213.261	562.759	1286.77	146.381	564.601	1287.08	281.824	664.894	1111.89	63.2184	690.206	1112.99	361.8	593.466	1062.03	215.295	704.954	775.046	-91.3132	439.274	843.894	-114.317	443.96	848.665	-36.8052	358.416	864.811	-69.4167	263.517	834.274	-68.2966	696.765	770.486	505.835	427.867	846.078	479.694	450.642	845.324	401.133	372.148	873.636	432.812	266.157	829.228	431.427
565	5.64	530.108	1293.82	213.3	562.785	1286.8	146.427	564.641	1287.1	281.866	664.892	1111.88	63.2291	690.212	1112.99	361.812	593.458	1062.05	215.337	704.956	775.056	-91.3348	439.228	843.89	-114.295	443.947	848.676	-36.7941	358.411	864.824	-69.3853	263.562	834.253	-68.3255	696.759	770.462	505.844	427.873	846.07	479.705	450.624	845.34	401.143	372.148	873.627	432.817	266.18	829.186	431.428
566	5.65	530.153	1293.8	213.322	562.861	1286.8	146.435	564.678	1287.09	281.88	664.893	1111.86	63.2367	690.201	1112.98	361.832	593.503	1062.02	215.364	704.997	775.075	-91.3409	439.273	843.871	-114.3	443.986	848.629	-36.7949	358.438	864.812	-69.3766	263.623	834.232	-68.3411	696.761	770.445	505.859	427.882	846.035	479.71	450.655	845.329	401.141	372.148	873.604	432.821	266.033	829.193	431.498
567	5.66	530.2	1293.77	213.329	562.855	1286.76	146.458	564.692	1287.09	281.904	664.903	1111.84	63.2635	690.172	1112.98	361.852	593.563	1061.96	215.39	705.008	775.038	-91.3343	439.336	843.858	-114.294	443.966	848.589	-36.7794	358.459	864.791	-69.367	263.601	834.22	-68.285	696.766	770.436	505.875	427.888	846.012	479.732	450.702	845.3	401.169	372.161	873.586	432.836	266.002	829.186	431.539
568	5.67	530.211	1293.77	213.306	562.854	1286.75	146.475	564.726	1287.09	281.895	664.885	1111.83	63.2712	690.17	1112.97	361.868	593.548	1061.92	215.419	704.97	775.028	-91.3468	439.301	843.872	-114.276	443.932	848.594	-36.7689	358.452	864.773	-69.3647	263.618	834.2	-68.2918	696.763	770.424	505.893	427.873	846.008	479.74	450.67	845.29	401.164	372.194	873.581	432.848	266.033	829.195	431.526
569	5.68	530.235	1293.8	213.279	562.893	1286.75	146.411	564.716	1287.09	281.856	664.855	1111.83	63.2564	690.172	1112.96	361.85	593.554	1061.91	215.384	704.967	775.032	-91.338	439.304	843.857	-114.287	443.948	848.603	-36.782	358.453	864.761	-69.3968	263.626	834.205	-68.3539	696.766	770.44	505.884	427.852	846.017	479.721	450.601	845.301	401.122	372.187	873.58	432.823	266.041	829.204	431.504
570	5.69	530.253	1293.82	213.226	562.892	1286.75	146.368	564.642	1287.11	281.814	664.829	1111.84	63.2354	690.139	1112.96	361.826	593.537	1061.91	215.343	704.991	775.034	-91.3149	439.304	843.851	-114.295	443.956	848.595	-36.8004	358.451	864.769	-69.433	263.611	834.195	-68.3787	696.761	770.452	505.874	427.82	846.04	479.693	450.55	845.315	401.094	372.157	873.603	432.806	266.046	829.219	431.476
571	5.7	530.256	1293.85	213.23	562.819	1286.79	146.388	564.606	1287.13	281.811	664.818	1111.85	63.2343	690.099	1112.98	361.841	593.492	1061.92	215.326	704.978	775.069	-91.2839	439.3	843.875	-114.318	443.953	848.601	-36.8119	358.431	864.791	-69.4406	263.589	834.216	-68.3566	696.739	770.463	505.88	427.791	846.063	479.681	450.533	845.327	401.086	372.113	873.633	432.819	266.036	829.245	431.468
572	5.71	530.214	1293.85	213.277	562.829	1286.8	146.407	564.577	1287.15	281.833	664.815	1111.87	63.2372	690.106	1112.99	361.851	593.481	1061.93	215.342	704.953	775.092	-91.2712	439.284	843.888	-114.305	443.976	848.625	-36.8157	358.42	864.791	-69.4278	263.57	834.253	-68.3217	696.771	770.506	505.897	427.795	846.077	479.698	450.518	845.348	401.098	372.112	873.651	432.815	265.996	829.284	431.502
573	5.72	530.161	1293.87	213.275	562.863	1286.79	146.385	564.588	1287.14	281.813	664.813	1111.89	63.2248	690.079	1112.99	361.838	593.497	1061.91	215.318	704.879	775.06	-91.2725	439.27	843.885	-114.316	443.966	848.622	-36.8173	358.413	864.788	-69.4328	263.593	834.251	-68.3621	696.758	770.521	505.905	427.78	846.071	479.677	450.524	845.361	401.093	372.105	873.64	432.799	266.001	829.272	431.497
574	5.73	530.186	1293.83	213.249	562.859	1286.79	146.355	564.591	1287.13	281.806	664.831	1111.87	63.2164	690.07	1112.98	361.814	593.493	1061.91	215.304	704.907	775.063	-91.2635	439.251	843.887	-114.329	443.96	848.609	-36.8287	358.416	864.786	-69.44	263.55	834.241	-68.3728	696.716	770.508	505.92	427.759	846.061	479.675	450.539	845.358	401.09	372.074	873.627	432.796	265.992	829.207	431.5
575	5.74	530.247	1293.81	213.262	562.874	1286.79	146.371	564.605	1287.13	281.848	664.844	1111.87	63.2334	690.104	1112.99	361.844	593.534	1061.91	215.342	704.981	775.088	-91.2619	439.259	843.896	-114.306	443.985	848.595	-36.8086	358.428	864.799	-69.4015	263.559	834.239	-68.3537	696.722	770.497	505.947	427.785	846.052	479.699	450.596	845.35	401.141	372.095	873.63	432.825	266.003	829.183	431.517
576	5.75	530.165	1293.8	213.298	562.852	1286.79	146.403	564.63	1287.12	281.868	664.858	1111.87	63.2452	690.105	1112.99	361.858	593.528	1061.94	215.382	704.97	775.08	-91.272	439.301	843.884	-114.294	443.942	848.614	-36.7721	358.429	864.812	-69.371	263.566	834.232	-68.344	696.719	770.484	505.955	427.829	846.044	479.735	450.651	845.345	401.187	372.114	873.622	432.854	266.026	829.213	431.529
577	5.76	530.076	1293.82	213.285	562.832	1286.78	146.387	564.635	1287.09	281.85	664.874	1111.86	63.242	690.127	1113	361.836	593.51	1061.95	215.363	704.958	775.065	-91.2884	439.324	843.877	-114.324	443.953	848.619	-36.7933	358.45	864.808	-69.3824	263.555	834.235	-68.3449	696.715	770.496	505.945	427.861	846.048	479.739	450.675	845.334	401.185	372.159	873.615	432.829	265.997	829.245	431.54
578	5.77	530.101	1293.8	213.227	562.782	1286.77	146.379	564.607	1287.08	281.808	664.89	1111.87	63.2279	690.177	1113.01	361.833	593.494	1061.95	215.319	704.978	775.031	-91.3153	439.324	843.886	-114.331	443.983	848.627	-36.8219	358.449	864.811	-69.4121	263.591	834.253	-68.3857	696.719	770.508	505.944	427.852	846.06	479.716	450.7	845.316	401.163	372.191	873.608	432.804	266.052	829.249	431.508
579	5.78	530.168	1293.81	213.21	562.807	1286.77	146.372	564.584	1287.07	281.786	664.907	1111.87	63.2201	690.182	1113.01	361.834	593.548	1061.92	215.279	704.985	775.036	-91.3181	439.336	843.891	-114.339	443.991	848.628	-36.8417	358.459	864.808	-69.4297	263.677	834.25	-68.4394	696.76	770.52	505.947	427.872	846.059	479.711	450.689	845.299	401.144	372.207	873.612	432.803	266.119	829.226	431.478
580	5.79	530.154	1293.81	213.237	562.835	1286.77	146.362	564.606	1287.07	281.792	664.913	1111.86	63.2276	690.197	1113.01	361.826	593.58	1061.89	215.304	705.01	775.051	-91.331	439.34	843.901	-114.332	443.985	848.636	-36.8178	358.498	864.815	-69.4114	263.668	834.264	-68.405	696.775	770.532	505.951	427.884	846.066	479.716	450.624	845.327	401.134	372.207	873.62	432.811	266.111	829.241	431.493
581	5.8	530.113	1293.78	213.256	562.781	1286.74	146.379	564.567	1287.09	281.799	664.906	1111.86	63.212	690.186	1113	361.8	593.529	1061.91	215.34	704.998	775.034	-91.391	439.285	843.895	-114.33	443.981	848.634	-36.8061	358.453	864.821	-69.3799	263.642	834.25	-68.357	696.773	770.53	505.939	427.872	846.069	479.718	450.558	845.368	401.124	372.169	873.616	432.8	266.132	829.218	431.484
582	5.81	530.141	1293.73	213.264	562.777	1286.73	146.381	564.535	1287.07	281.79	664.906	1111.85	63.2103	690.178	1113	361.8	593.506	1061.89	215.33	704.993	775.036	-91.3863	439.284	843.888	-114.34	443.961	848.611	-36.8025	358.435	864.806	-69.378	263.639	834.225	-68.3766	696.751	770.507	505.938	427.832	846.064	479.715	450.509	845.374	401.096	372.134	873.606	432.797	266.163	829.169	431.487
583	5.82	530.2	1293.66	213.248	562.858	1286.69	146.336	564.501	1287.03	281.776	664.903	1111.85	63.2191	690.167	1112.98	361.808	593.564	1061.83	215.297	704.978	775.059	-91.3593	439.288	843.877	-114.338	443.975	848.6	-36.8061	358.454	864.788	-69.3997	263.631	834.224	-68.3604	696.753	770.503	505.946	427.808	846.065	479.71	450.504	845.354	401.086	372.103	873.628	432.817	266.093	829.2	431.502
584	5.83	530.143	1293.62	213.242	562.837	1286.67	146.316	564.529	1287	281.753	664.895	1111.85	63.2021	690.164	1112.97	361.788	593.588	1061.81	215.281	704.996	775.105	-91.365	439.306	843.873	-114.333	443.973	848.595	-36.8188	358.45	864.779	-69.4117	263.637	834.23	-68.3382	696.772	770.52	505.936	427.804	846.074	479.702	450.53	845.338	401.086	372.089	873.648	432.833	266.068	829.224	431.516
585	5.84	530.058	1293.64	213.23	562.747	1286.69	146.322	564.526	1287	281.71	664.871	1111.86	63.1735	690.159	1112.98	361.76	593.571	1061.81	215.258	704.991	775.093	-91.387	439.277	843.884	-114.324	443.931	848.618	-36.8254	358.428	864.783	-69.4133	263.584	834.273	-68.3282	696.756	770.518	505.898	427.797	846.071	479.679	450.554	845.32	401.087	372.089	873.662	432.828	266.105	829.257	431.488
586	5.85	530.047	1293.66	213.195	562.721	1286.71	146.308	564.476	1287.01	281.677	664.858	1111.86	63.1611	690.162	1112.99	361.744	593.537	1061.84	215.225	704.984	775.077	-91.3928	439.269	843.893	-114.345	443.953	848.637	-36.8604	358.401	864.804	-69.4253	263.59	834.269	-68.3519	696.758	770.518	505.873	427.773	846.073	479.662	450.567	845.304	401.089	372.11	873.665	432.806	266.03	829.29	431.472
587	5.86	530.059	1293.69	213.175	562.751	1286.72	146.27	564.507	1287.02	281.675	664.874	1111.86	63.1522	690.168	1112.99	361.725	593.539	1061.87	215.217	705.019	775.066	-91.38	439.317	843.898	-114.362	444.005	848.637	-36.8631	358.469	864.807	-69.4535	263.603	834.262	-68.364	696.777	770.519	505.868	427.797	846.08	479.661	450.629	845.277	401.114	372.129	873.644	432.798	265.962	829.317	431.485
588	5.87	530.032	1293.72	213.213	562.809	1286.73	146.249	564.568	1287.05	281.701	664.902	1111.86	63.1448	690.188	1113	361.743	593.529	1061.91	215.25	705.027	775.06	-91.3773	439.319	843.885	-114.35	443.991	848.649	-36.8454	358.454	864.828	-69.427	263.551	834.274	-68.341	696.789	770.52	505.867	427.847	846.079	479.675	450.674	845.283	401.151	372.154	873.627	432.798	265.954	829.274	431.512
589	5.88	530.036	1293.74	213.233	562.785	1286.75	146.308	564.615	1287.09	281.74	664.904	1111.85	63.1561	690.17	1113	361.75	593.437	1061.97	215.285	705.013	775.04	-91.3997	439.282	843.881	-114.301	443.96	848.655	-36.8079	358.401	864.85	-69.3649	263.534	834.259	-68.3217	696.796	770.53	505.869	427.843	846.071	479.705	450.668	845.328	401.182	372.146	873.612	432.813	266.047	829.18	431.51
590	5.89	530.06	1293.74	213.257	562.766	1286.73	146.342	564.59	1287.1	281.757	664.892	1111.85	63.1742	690.146	1113.01	361.761	593.526	1061.93	215.301	704.997	775.033	-91.3955	439.272	843.896	-114.288	443.947	848.662	-36.7797	358.406	864.845	-69.3483	263.635	834.204	-68.3618	696.765	770.509	505.894	427.836	846.052	479.735	450.645	845.356	401.177	372.163	873.591	432.814	266.126	829.129	431.475
591	5.9	530.151	1293.73	213.246	562.836	1286.71	146.311	564.584	1287.09	281.742	664.882	1111.85	63.1782	690.165	1113.01	361.766	593.589	1061.89	215.289	705.017	775.056	-91.3736	439.298	843.877	-114.306	443.975	848.627	-36.7953	358.457	864.815	-69.3637	263.667	834.177	-68.3725	696.757	770.509	505.897	427.836	846.048	479.732	450.627	845.369	401.137	372.12	873.61	432.829	266.064	829.153	431.492
592	5.91	530.235	1293.72	213.188	562.873	1286.71	146.288	564.595	1287.07	281.709	664.88	1111.85	63.1743	690.157	1113.02	361.743	593.627	1061.85	215.277	705.005	775.06	-91.3944	439.303	843.869	-114.32	443.989	848.602	-36.8055	358.473	864.782	-69.3825	263.649	834.194	-68.3291	696.78	770.536	505.883	427.825	846.059	479.717	450.604	845.378	401.109	372.075	873.624	432.829	265.977	829.2	431.548
593	5.92	530.223	1293.74	213.153	562.879	1286.71	146.252	564.562	1287.07	281.687	664.861	1111.87	63.1603	690.145	1113.02	361.733	593.618	1061.86	215.259	704.968	775.053	-91.4003	439.277	843.889	-114.311	443.99	848.606	-36.8214	358.474	864.781	-69.4068	263.608	834.232	-68.326	696.743	770.545	505.863	427.808	846.089	479.714	450.523	845.383	401.082	372.065	873.66	432.824	265.949	829.252	431.57
594	5.93	530.241	1293.77	213.098	562.91	1286.72	146.195	564.543	1287.05	281.644	664.848	1111.88	63.1429	690.155	1113.01	361.716	593.6	1061.87	215.235	704.947	775.059	-91.3889	439.26	843.886	-114.344	444.015	848.623	-36.8573	358.468	864.792	-69.4396	263.656	834.243	-68.3737	696.748	770.562	505.849	427.802	846.109	479.695	450.466	845.361	401.05	372.108	873.682	432.814	265.955	829.294	431.556
595	5.94	530.228	1293.78	213.06	562.937	1286.71	146.15	564.547	1287.07	281.613	664.832	1111.87	63.124	690.147	1113.01	361.689	593.598	1061.88	215.192	704.944	775.028	-91.3619	439.282	843.888	-114.376	444.056	848.629	-36.8829	358.463	864.802	-69.4756	263.654	834.255	-68.3976	696.769	770.575	505.846	427.817	846.113	479.669	450.493	845.328	401.029	372.143	873.674	432.791	266.048	829.303	431.505
596	5.95	530.135	1293.8	213.081	562.879	1286.72	146.158	564.575	1287.1	281.619	664.837	1111.86	63.1175	690.141	1113	361.693	593.547	1061.92	215.192	704.971	775.002	-91.37	439.294	843.899	-114.363	444.03	848.638	-36.8776	358.455	864.821	-69.4737	263.574	834.26	-68.3577	696.772	770.554	505.84	427.845	846.104	479.674	450.536	845.313	401.054	372.19	873.656	432.789	266.055	829.302	431.473
597	5.96	530.11	1293.85	213.126	562.841	1286.75	146.167	564.591	1287.12	281.644	664.858	1111.85	63.1315	690.136	1113	361.738	593.461	1061.97	215.245	704.963	774.971	-91.3893	439.295	843.905	-114.333	443.996	848.66	-36.8325	358.426	864.845	-69.4309	263.604	834.234	-68.3787	696.776	770.526	505.853	427.892	846.086	479.697	450.612	845.3	401.13	372.21	873.64	432.799	266.078	829.274	431.449
598	5.97	530.093	1293.89	213.109	562.786	1286.76	146.189	564.591	1287.12	281.664	664.88	1111.82	63.1456	690.123	1112.99	361.754	593.465	1061.98	215.287	704.979	774.949	-91.3835	439.308	843.897	-114.331	443.974	848.667	-36.8043	358.422	864.858	-69.4039	263.673	834.221	-68.3961	696.786	770.509	505.872	427.9	846.059	479.713	450.65	845.302	401.167	372.203	873.604	432.793	266.049	829.246	431.499
599	5.98	530.09	1293.86	213.106	562.768	1286.76	146.198	564.572	1287.1	281.655	664.856	1111.81	63.1443	690.096	1112.96	361.745	593.472	1061.95	215.268	704.969	774.938	-91.3653	439.256	843.89	-114.326	443.952	848.67	-36.8068	358.427	864.851	-69.4044	263.636	834.21	-68.3658	696.806	770.506	505.877	427.88	846.04	479.707	450.69	845.299	401.177	372.224	873.59	432.788	265.994	829.239	431.513
600	5.99	530.074	1293.81	213.105	562.763	1286.78	146.202	564.558	1287.09	281.664	664.837	1111.79	63.1433	690.102	1112.97	361.736	593.479	1061.94	215.261	704.978	774.952	-91.3499	439.267	843.879	-114.318	443.969	848.648	-36.8133	358.432	864.816	-69.3994	263.603	834.217	-68.3599	696.782	770.49	505.889	427.883	846.032	479.713	450.71	845.292	401.183	372.207	873.579	432.79	265.963	829.236	431.513
601	6	530.1	1293.79	213.114	562.737	1286.74	146.218	564.549	1287.1	281.671	664.838	1111.8	63.1629	690.079	1112.98	361.767	593.497	1061.91	215.281	704.968	774.972	-91.3605	439.314	843.855	-114.31	443.979	848.627	-36.8164	358.408	864.808	-69.3964	263.575	834.227	-68.3373	696.753	770.502	505.903	427.876	846.042	479.716	450.66	845.304	401.159	372.191	873.596	432.804	265.988	829.243	431.529
602	6.01	530.113	1293.73	213.106	562.748	1286.7	146.19	564.486	1287.07	281.642	664.815	1111.82	63.1655	690.079	1112.99	361.763	593.536	1061.86	215.254	704.963	775.018	-91.3503	439.315	843.871	-114.327	443.999	848.603	-36.8344	358.401	864.804	-69.3967	263.6	834.207	-68.3498	696.764	770.533	505.907	427.847	846.045	479.703	450.581	845.321	401.098	372.146	873.618	432.805	266.026	829.24	431.51
603	6.02	530.064	1293.69	213.083	562.722	1286.68	146.162	564.412	1287.04	281.597	664.762	1111.84	63.1437	690.071	1112.99	361.734	593.568	1061.82	215.198	704.969	775.062	-91.338	439.279	843.882	-114.359	444.014	848.58	-36.8646	358.402	864.777	-69.4366	263.599	834.226	-68.3617	696.742	770.541	505.901	427.773	846.064	479.683	450.526	845.325	401.044	372.078	873.648	432.808	266.061	829.213	431.472
604	6.03	530.058	1293.69	213.093	562.699	1286.66	146.186	564.385	1287.04	281.616	664.743	1111.85	63.1569	690.043	1113.01	361.764	593.629	1061.82	215.208	704.94	775.076	-91.3354	439.279	843.877	-114.349	443.986	848.592	-36.8454	358.411	864.778	-69.4425	263.594	834.25	-68.3507	696.718	770.54	505.915	427.738	846.087	479.686	450.498	845.351	401.034	372.051	873.671	432.821	266.108	829.196	431.5
605	6.04	530.064	1293.69	213.149	562.674	1286.68	146.247	564.374	1287.05	281.673	664.765	1111.87	63.174	690.067	1113	361.791	593.628	1061.84	215.258	704.927	775.076	-91.3498	439.287	843.884	-114.328	443.974	848.613	-36.8276	358.415	864.804	-69.4115	263.586	834.242	-68.3194	696.701	770.538	505.935	427.781	846.088	479.708	450.521	845.367	401.061	372.066	873.668	432.831	266.156	829.196	431.49
606	6.05	530.048	1293.69	213.168	562.662	1286.7	146.282	564.386	1287.05	281.711	664.79	1111.86	63.1897	690.071	1113	361.794	593.579	1061.89	215.28	704.963	775.094	-91.3445	439.284	843.902	-114.332	443.982	848.637	-36.8206	358.458	864.813	-69.4081	263.603	834.237	-68.3141	696.719	770.535	505.928	427.804	846.076	479.715	450.544	845.36	401.084	372.104	873.656	432.829	266.166	829.176	431.489
607	6.06	529.963	1293.69	213.171	562.654	1286.69	146.271	564.403	1287.03	281.712	664.804	1111.85	63.1931	690.073	1112.99	361.79	593.531	1061.93	215.267	704.993	775.074	-91.3504	439.289	843.902	-114.351	443.98	848.649	-36.8328	358.457	864.813	-69.4262	263.605	834.247	-68.3322	696.73	770.533	505.922	427.828	846.061	479.701	450.584	845.345	401.115	372.122	873.636	432.816	266.127	829.175	431.478
608	6.07	529.936	1293.68	213.178	562.63	1286.69	146.279	564.42	1287.01	281.735	664.815	1111.85	63.1975	690.083	1112.99	361.792	593.507	1061.94	215.274	704.974	775.06	-91.363	439.259	843.881	-114.349	443.978	848.665	-36.8368	358.448	864.809	-69.4419	263.601	834.235	-68.3512	696.712	770.494	505.891	427.85	846.046	479.695	450.658	845.32	401.158	372.172	873.62	432.808	266.077	829.225	431.492
609	6.08	530.009	1293.67	213.218	562.605	1286.71	146.332	564.441	1287.01	281.786	664.866	1111.85	63.2024	690.096	1112.99	361.793	593.492	1061.96	215.314	704.99	775.047	-91.3744	439.287	843.889	-114.336	444.038	848.674	-36.8407	358.446	864.823	-69.4175	263.627	834.221	-68.3675	696.751	770.491	505.877	427.884	846.064	479.714	450.696	845.297	401.189	372.227	873.621	432.814	266.07	829.272	431.508
610	6.09	529.984	1293.68	213.237	562.579	1286.72	146.371	564.444	1287.01	281.791	664.868	1111.86	63.1993	690.126	1112.99	361.804	593.471	1061.96	215.31	705.023	775.026	-91.3824	439.291	843.889	-114.324	444.023	848.682	-36.8384	358.411	864.84	-69.4146	263.619	834.234	-68.3548	696.774	770.499	505.865	427.913	846.078	479.718	450.675	845.277	401.184	372.235	873.624	432.815	266.073	829.306	431.5
611	6.1	529.972	1293.63	213.228	562.558	1286.7	146.361	564.405	1286.94	281.754	664.843	1111.84	63.1916	690.132	1112.96	361.801	593.489	1061.93	215.256	704.99	775.012	-91.3624	439.27	843.881	-114.345	444.015	848.656	-36.8569	358.415	864.813	-69.4617	263.638	834.222	-68.3681	696.784	770.491	505.845	427.864	846.077	479.687	450.658	845.268	401.146	372.216	873.635	432.812	266.049	829.311	431.464
612	6.11	530.018	1293.6	213.241	562.577	1286.65	146.372	564.4	1286.9	281.76	664.84	1111.83	63.1908	690.156	1112.94	361.79	593.561	1061.87	215.233	704.984	775.014	-91.3728	439.269	843.887	-114.349	444.043	848.623	-36.8868	358.463	864.773	-69.4793	263.685	834.198	-68.4175	696.79	770.471	505.83	427.836	846.061	479.678	450.65	845.266	401.11	372.198	873.636	432.809	266.011	829.293	431.485
613	6.12	530.009	1293.56	213.306	562.608	1286.64	146.424	564.423	1286.9	281.818	664.856	1111.84	63.2111	690.144	1112.94	361.8	593.601	1061.84	215.298	705.03	775.06	-91.3876	439.272	843.873	-114.321	444.029	848.601	-36.8617	358.481	864.778	-69.4259	263.654	834.201	-68.3707	696.789	770.455	505.846	427.864	846.045	479.706	450.607	845.303	401.087	372.168	873.638	432.832	266.047	829.247	431.508
614	6.13	529.998	1293.54	213.348	562.561	1286.64	146.524	564.398	1286.93	281.866	664.832	1111.84	63.2312	690.129	1112.93	361.825	593.584	1061.85	215.331	704.995	775.08	-91.3997	439.262	843.846	-114.299	443.967	848.589	-36.8109	358.448	864.786	-69.3838	263.656	834.194	-68.3524	696.776	770.431	505.859	427.848	846.034	479.716	450.525	845.355	401.084	372.122	873.632	432.844	266.081	829.184	431.507
615	6.14	530.009	1293.55	213.345	562.547	1286.62	146.533	564.392	1286.93	281.867	664.811	1111.84	63.2401	690.106	1112.93	361.833	593.555	1061.84	215.324	704.984	775.092	-91.3772	439.265	843.827	-114.33	443.931	848.581	-36.8118	358.413	864.774	-69.4084	263.628	834.184	-68.372	696.685	770.383	505.84	427.782	846.032	479.7	450.486	845.377	401.079	372.084	873.625	432.835	266.062	829.117	431.514
616	6.15	530.021	1293.56	213.35	562.552	1286.63	146.537	564.427	1286.92	281.875	664.846	1111.85	63.2449	690.129	1112.92	361.824	593.637	1061.79	215.342	704.98	775.083	-91.3662	439.277	843.82	-114.333	443.947	848.563	-36.8161	358.432	864.753	-69.4332	263.567	834.192	-68.3459	696.685	770.364	505.837	427.789	846.027	479.704	450.517	845.361	401.07	372.09	873.608	432.821	266.016	829.132	431.526
617	6.16	530.052	1293.58	213.367	562.587	1286.64	146.547	564.465	1286.93	281.895	664.881	1111.86	63.2492	690.158	1112.93	361.841	593.666	1061.8	215.356	705.022	775.099	-91.3741	439.305	843.833	-114.336	444.002	848.575	-36.8219	358.46	864.76	-69.4157	263.605	834.198	-68.3462	696.739	770.375	505.848	427.851	846.03	479.714	450.597	845.333	401.099	372.148	873.611	432.828	266.029	829.181	431.52
618	6.17	529.972	1293.63	213.353	562.579	1286.68	146.569	564.433	1286.97	281.894	664.879	1111.87	63.2572	690.166	1112.95	361.867	593.577	1061.88	215.354	705.052	775.115	-91.3634	439.272	843.869	-114.329	444.032	848.602	-36.8381	358.428	864.798	-69.4016	263.622	834.224	-68.3655	696.773	770.409	505.85	427.858	846.042	479.708	450.665	845.307	401.145	372.178	873.623	432.83	266.055	829.204	431.492
619	6.18	529.951	1293.68	213.336	562.562	1286.73	146.546	564.446	1286.99	281.871	664.841	1111.87	63.2474	690.151	1112.96	361.859	593.494	1061.95	215.315	705.044	775.125	-91.3351	439.251	843.907	-114.358	443.964	848.644	-36.8344	358.421	864.811	-69.4389	263.567	834.251	-68.3682	696.758	770.423	505.846	427.848	846.057	479.684	450.668	845.299	401.149	372.154	873.635	432.813	266.055	829.236	431.427
620	6.19	529.982	1293.7	213.338	562.625	1286.75	146.505	564.521	1287	281.874	664.848	1111.86	63.2471	690.158	1112.96	361.859	593.538	1061.96	215.307	705.079	775.146	-91.3223	439.25	843.921	-114.382	443.956	848.676	-36.8512	358.442	864.811	-69.466	263.576	834.269	-68.3889	696.761	770.435	505.848	427.866	846.065	479.678	450.693	845.282	401.128	372.177	873.643	432.808	266.06	829.276	431.43
621	6.2	530.065	1293.71	213.366	562.697	1286.77	146.526	564.565	1287.04	281.922	664.881	1111.87	63.2734	690.167	1112.96	361.872	593.628	1061.94	215.353	705.021	775.126	-91.3363	439.255	843.917	-114.352	443.978	848.684	-36.8356	358.458	864.811	-69.4375	263.604	834.272	-68.3817	696.767	770.438	505.87	427.908	846.065	479.707	450.696	845.273	401.131	372.214	873.654	432.832	266.179	829.256	431.477
622	6.21	530.047	1293.74	213.414	562.642	1286.77	146.595	564.534	1287.06	281.949	664.849	1111.88	63.3052	690.17	1112.97	361.919	593.567	1061.95	215.398	705.014	775.138	-91.3175	439.241	843.91	-114.322	443.95	848.674	-36.7959	358.435	864.812	-69.3988	263.574	834.276	-68.3511	696.745	770.426	505.884	427.867	846.055	479.727	450.645	845.294	401.163	372.176	873.66	432.842	266.154	829.261	431.516
623	6.22	530.053	1293.73	213.4	562.637	1286.77	146.601	564.478	1287.06	281.936	664.816	1111.88	63.3144	690.11	1112.96	361.913	593.502	1061.96	215.387	704.984	775.14	-91.298	439.227	843.911	-114.313	443.909	848.657	-36.7901	358.395	864.805	-69.4218	263.539	834.257	-68.3467	696.687	770.396	505.873	427.79	846.039	479.722	450.607	845.311	401.153	372.097	873.652	432.84	266.047	829.26	431.517
624	6.23	530.177	1293.7	213.385	562.715	1286.75	146.578	564.517	1287.04	281.924	664.821	1111.89	63.2859	690.118	1112.92	361.902	593.57	1061.9	215.379	704.968	775.149	-91.2909	439.27	843.892	-114.35	443.984	848.623	-36.8269	358.451	864.794	-69.4385	263.579	834.236	-68.3613	696.724	770.426	505.873	427.775	846.033	479.711	450.568	845.329	401.105	372.092	873.64	432.839	266.084	829.211	431.512
625	6.24	530.257	1293.72	213.42	562.743	1286.76	146.601	564.587	1287.02	281.959	664.844	1111.88	63.2901	690.138	1112.91	361.92	593.667	1061.85	215.401	704.955	775.147	-91.3107	439.295	843.858	-114.333	444.001	848.611	-36.8168	358.482	864.78	-69.4194	263.586	834.244	-68.3337	696.741	770.421	505.89	427.819	846.044	479.736	450.538	845.341	401.092	372.143	873.644	432.855	266.134	829.166	431.516
626	6.25	530.235	1293.73	213.429	562.716	1286.78	146.646	564.605	1287.05	281.984	664.843	1111.89	63.3078	690.159	1112.93	361.913	593.611	1061.9	215.423	704.993	775.149	-91.2996	439.291	843.856	-114.306	443.949	848.616	-36.7917	358.443	864.78	-69.3985	263.596	834.23	-68.3233	696.743	770.405	505.898	427.823	846.043	479.745	450.523	845.352	401.112	372.146	873.639	432.86	266.04	829.229	431.547
627	6.26	530.192	1293.76	213.427	562.748	1286.78	146.624	564.577	1287.07	281.969	664.843	1111.89	63.3045	690.174	1112.93	361.89	593.569	1061.91	215.405	705.005	775.115	-91.3039	439.278	843.87	-114.31	443.951	848.609	-36.7983	358.408	864.791	-69.4031	263.567	834.214	-68.31	696.726	770.384	505.901	427.813	846.037	479.731	450.545	845.355	401.121	372.137	873.632	432.841	265.905	829.272	431.518
628	6.27	530.246	1293.75	213.431	562.801	1286.77	146.59	564.607	1287.07	281.968	664.878	1111.88	63.2929	690.2	1112.92	361.87	593.599	1061.9	215.389	705.007	775.101	-91.3212	439.301	843.857	-114.307	443.99	848.603	-36.8333	358.442	864.788	-69.4305	263.606	834.201	-68.3406	696.719	770.364	505.889	427.837	846.034	479.719	450.589	845.33	401.105	372.152	873.62	432.825	265.989	829.245	431.501
629	6.28	530.247	1293.74	213.434	562.804	1286.77	146.615	564.655	1287.06	281.997	664.908	1111.86	63.2936	690.24	1112.89	361.865	593.662	1061.89	215.394	704.993	775.073	-91.3093	439.325	843.848	-114.323	443.979	848.601	-36.8209	358.489	864.771	-69.4335	263.631	834.208	-68.3609	696.734	770.365	505.892	427.875	846.021	479.724	450.637	845.304	401.125	372.199	873.6	432.826	266.11	829.202	431.499
630	6.29	530.185	1293.78	213.432	562.826	1286.79	146.616	564.636	1287.07	281.987	664.912	1111.85	63.2856	690.226	1112.9	361.887	593.635	1061.92	215.385	705.021	775.069	-91.2822	439.326	843.848	-114.341	443.948	848.615	-36.7963	358.464	864.78	-69.4332	263.609	834.199	-68.3589	696.748	770.363	505.881	427.851	846.01	479.707	450.681	845.3	401.156	372.205	873.583	432.815	266.064	829.187	431.498
631	6.3	530.086	1293.83	213.41	562.769	1286.81	146.62	564.618	1287.09	281.966	664.898	1111.85	63.2731	690.186	1112.91	361.89	593.509	1061.99	215.36	705.027	775.063	-91.2855	439.311	843.871	-114.367	443.952	848.613	-36.8109	358.429	864.802	-69.4525	263.647	834.211	-68.3864	696.741	770.361	505.869	427.81	846.03	479.677	450.697	845.313	401.161	372.157	873.601	432.8	265.974	829.222	431.491
632	6.31	530.076	1293.86	213.406	562.799	1286.82	146.606	564.625	1287.08	281.969	664.892	1111.86	63.2773	690.176	1112.93	361.893	593.517	1062	215.372	705.02	775.07	-91.3076	439.309	843.879	-114.368	443.957	848.623	-36.8328	358.423	864.816	-69.4525	263.687	834.229	-68.4063	696.73	770.372	505.866	427.825	846.048	479.685	450.702	845.314	401.166	372.157	873.615	432.809	266.007	829.252	431.487
633	6.32	530.134	1293.87	213.428	562.8	1286.84	146.628	564.652	1287.08	281.976	664.895	1111.87	63.2862	690.171	1112.95	361.9	593.541	1061.99	215.398	704.995	775.084	-91.3086	439.297	843.886	-114.337	443.953	848.638	-36.8252	358.417	864.826	-69.4306	263.667	834.239	-68.3714	696.74	770.402	505.868	427.848	846.078	479.704	450.654	845.329	401.177	372.172	873.633	432.829	266.088	829.294	431.517
634	6.33	530.114	1293.87	213.413	562.762	1286.83	146.633	564.636	1287.11	281.971	664.884	1111.89	63.2864	690.182	1112.95	361.894	593.51	1062.01	215.395	705.035	775.134	-91.3055	439.282	843.92	-114.321	443.939	848.655	-36.8082	358.403	864.839	-69.4247	263.608	834.242	-68.3369	696.739	770.417	505.847	427.831	846.069	479.709	450.629	845.333	401.17	372.166	873.65	432.835	266.042	829.302	431.529
635	6.34	530.141	1293.85	213.377	562.743	1286.84	146.641	564.601	1287.12	281.951	664.885	1111.89	63.2765	690.181	1112.94	361.886	593.484	1062	215.376	705.01	775.151	-91.3064	439.248	843.911	-114.316	443.945	848.651	-36.8251	358.403	864.826	-69.4459	263.623	834.228	-68.3786	696.723	770.399	505.836	427.789	846.067	479.689	450.582	845.334	401.126	372.147	873.643	432.818	266.011	829.252	431.481
636	6.35	530.197	1293.81	213.401	562.766	1286.83	146.655	564.659	1287.1	281.957	664.896	1111.89	63.2922	690.195	1112.92	361.889	593.596	1061.94	215.386	704.987	775.148	-91.3083	439.261	843.879	-114.328	443.961	848.641	-36.8314	358.432	864.787	-69.453	263.671	834.211	-68.3849	696.778	770.403	505.849	427.827	846.05	479.707	450.566	845.325	401.096	372.146	873.634	432.821	266.166	829.192	431.443
637	6.36	530.299	1293.77	213.46	562.811	1286.81	146.684	564.71	1287.05	281.987	664.921	1111.88	63.3133	690.238	1112.89	361.909	593.741	1061.86	215.421	705.023	775.152	-91.315	439.279	843.845	-114.32	443.971	848.601	-36.8004	358.47	864.758	-69.4162	263.606	834.228	-68.3377	696.787	770.402	505.86	427.868	846.027	479.749	450.548	845.315	401.107	372.171	873.623	432.84	266.197	829.187	431.5
638	6.37	530.367	1293.73	213.44	562.815	1286.79	146.674	564.68	1287.03	281.974	664.914	1111.87	63.3139	690.233	1112.88	361.901	593.747	1061.83	215.433	705.058	775.168	-91.3269	439.264	843.826	-114.285	443.993	848.563	-36.7868	358.491	864.737	-69.4068	263.581	834.232	-68.3	696.749	770.364	505.852	427.871	846.007	479.748	450.527	845.314	401.095	372.132	873.621	432.843	266.127	829.176	431.514
639	6.38	530.35	1293.74	213.425	562.842	1286.77	146.619	564.686	1287.03	281.955	664.885	1111.86	63.3053	690.201	1112.88	361.896	593.711	1061.84	215.413	705.036	775.152	-91.3243	439.251	843.813	-114.298	443.979	848.555	-36.7964	358.49	864.742	-69.4137	263.599	834.231	-68.3224	696.685	770.34	505.855	427.836	846.009	479.728	450.527	845.304	401.084	372.088	873.619	432.839	266.13	829.138	431.467
640	6.39	530.376	1293.75	213.409	562.862	1286.81	146.582	564.706	1287.07	281.972	664.896	1111.87	63.293	690.213	1112.91	361.894	593.714	1061.86	215.375	705.001	775.137	-91.3172	439.278	843.843	-114.322	443.998	848.581	-36.8304	358.477	864.777	-69.4292	263.598	834.239	-68.3497	696.716	770.369	505.853	427.847	846.017	479.728	450.577	845.306	401.086	372.093	873.62	432.841	266.131	829.166	431.476
641	6.4	530.292	1293.84	213.406	562.874	1286.87	146.591	564.713	1287.15	281.975	664.914	1111.89	63.2841	690.226	1112.93	361.885	593.637	1061.96	215.376	705.043	775.163	-91.3238	439.29	843.901	-114.322	443.969	848.638	-36.8171	358.443	864.826	-69.4269	263.57	834.247	-68.3279	696.771	770.408	505.841	427.84	846.053	479.709	450.645	845.346	401.134	372.125	873.638	432.849	266.011	829.274	431.532
642	6.41	530.213	1293.94	213.392	562.879	1286.93	146.596	564.703	1287.19	281.952	664.904	1111.9	63.2742	690.221	1112.96	361.89	593.503	1062.08	215.378	705.056	775.156	-91.317	439.269	843.948	-114.288	443.92	848.717	-36.792	358.378	864.896	-69.3943	263.531	834.261	-68.3196	696.785	770.415	505.818	427.833	846.091	479.697	450.657	845.384	401.2	372.157	873.651	432.837	265.93	829.355	431.539
643	6.42	530.199	1293.97	213.366	562.867	1286.96	146.58	564.683	1287.2	281.946	664.888	1111.9	63.2625	690.205	1112.98	361.877	593.456	1062.09	215.377	704.997	775.117	-91.3351	439.272	843.957	-114.304	443.931	848.751	-36.806	358.383	864.908	-69.407	263.537	834.276	-68.3309	696.76	770.419	505.816	427.835	846.103	479.701	450.667	845.386	401.204	372.156	873.674	432.839	265.985	829.36	431.523
644	6.43	530.251	1293.95	213.344	562.899	1286.94	146.504	564.674	1287.2	281.937	664.898	1111.9	63.2438	690.229	1112.95	361.844	593.569	1062.03	215.337	704.974	775.1	-91.3414	439.286	843.92	-114.332	443.984	848.707	-36.8556	358.422	864.864	-69.4559	263.6	834.246	-68.3875	696.758	770.416	505.815	427.872	846.089	479.699	450.669	845.348	401.147	372.165	873.674	432.838	266.209	829.274	431.449
645	6.44	530.262	1293.89	213.355	562.89	1286.89	146.47	564.703	1287.16	281.917	664.909	1111.87	63.2419	690.221	1112.92	361.834	593.644	1061.95	215.325	704.972	775.087	-91.3458	439.292	843.882	-114.353	443.989	848.635	-36.8608	358.447	864.812	-69.4721	263.618	834.228	-68.4021	696.791	770.404	505.826	427.878	846.059	479.694	450.649	845.309	401.108	372.185	873.633	432.817	266.246	829.177	431.43
646	6.45	530.242	1293.85	213.367	562.861	1286.82	146.509	564.679	1287.12	281.902	664.906	1111.84	63.2539	690.216	1112.9	361.837	593.608	1061.91	215.345	704.985	775.068	-91.3259	439.286	843.86	-114.344	443.968	848.59	-36.8475	358.433	864.787	-69.4476	263.594	834.23	-68.3646	696.751	770.362	505.824	427.814	846.023	479.687	450.641	845.27	401.125	372.163	873.61	432.819	266.15	829.158	431.454
647	6.46	530.259	1293.81	213.382	562.841	1286.79	146.549	564.682	1287.07	281.915	664.897	1111.83	63.269	690.201	1112.88	361.854	593.61	1061.87	215.353	704.992	775.068	-91.3128	439.284	843.83	-114.318	443.952	848.571	-36.8276	358.424	864.766	-69.4269	263.585	834.217	-68.3444	696.718	770.35	505.849	427.821	845.997	479.703	450.638	845.249	401.144	372.165	873.585	432.833	266.066	829.176	431.498
648	6.47	530.28	1293.75	213.367	562.859	1286.76	146.56	564.721	1287.04	281.915	664.899	1111.84	63.2742	690.201	1112.87	361.853	593.665	1061.82	215.374	704.964	775.074	-91.3323	439.284	843.81	-114.33	443.958	848.554	-36.8312	358.442	864.728	-69.4311	263.607	834.191	-68.3428	696.716	770.366	505.871	427.861	845.99	479.714	450.603	845.258	401.118	372.162	873.599	432.845	266.04	829.177	431.556
649	6.48	530.258	1293.75	213.372	562.861	1286.74	146.544	564.712	1287.02	281.909	664.897	1111.84	63.2725	690.217	1112.89	361.841	593.716	1061.8	215.364	704.984	775.091	-91.3508	439.28	843.813	-114.347	443.977	848.54	-36.8423	358.442	864.732	-69.439	263.574	834.207	-68.3218	696.698	770.369	505.85	427.843	846.004	479.71	450.581	845.266	401.103	372.149	873.625	432.847	266.039	829.196	431.554
650	6.49	530.236	1293.8	213.366	562.855	1286.77	146.531	564.639	1287.09	281.915	664.901	1111.87	63.2769	690.224	1112.9	361.858	593.649	1061.87	215.362	705.036	775.136	-91.3455	439.266	843.854	-114.327	443.984	848.576	-36.8248	358.454	864.756	-69.4324	263.567	834.235	-68.2979	696.731	770.384	505.831	427.803	846.028	479.708	450.548	845.304	401.099	372.126	873.638	432.833	265.985	829.259	431.549
651	6.5	530.256	1293.85	213.355	562.895	1286.81	146.523	564.63	1287.15	281.928	664.908	1111.89	63.2789	690.239	1112.94	361.883	593.622	1061.97	215.382	705.017	775.145	-91.3343	439.31	843.869	-114.318	443.978	848.642	-36.792	358.461	864.796	-69.4005	263.592	834.237	-68.2939	696.776	770.42	505.854	427.842	846.06	479.718	450.55	845.347	401.112	372.118	873.638	432.83	266.045	829.251	431.531
652	6.51	530.273	1293.89	213.343	562.939	1286.87	146.496	564.696	1287.16	281.939	664.91	1111.9	63.2794	690.228	1112.97	361.867	593.575	1062.04	215.388	705.005	775.14	-91.3231	439.292	843.884	-114.303	443.961	848.699	-36.7885	358.444	864.848	-69.3877	263.612	834.256	-68.3588	696.736	770.418	505.861	427.86	846.072	479.714	450.57	845.393	401.113	372.15	873.644	432.827	266.143	829.211	431.506
653	6.52	530.194	1293.95	213.332	562.826	1286.92	146.526	564.698	1287.19	281.928	664.91	1111.9	63.2844	690.188	1112.98	361.862	593.481	1062.1	215.402	704.993	775.137	-91.3078	439.279	843.93	-114.307	443.944	848.73	-36.7913	358.404	864.896	-69.3734	263.596	834.256	-68.3863	696.729	770.418	505.846	427.83	846.078	479.717	450.593	845.431	401.142	372.159	873.637	432.82	266.167	829.22	431.481
654	6.53	530.184	1293.96	213.332	562.796	1286.92	146.538	564.647	1287.2	281.928	664.91	1111.9	63.2809	690.197	1112.98	361.88	593.448	1062.11	215.423	705.013	775.139	-91.2891	439.272	843.945	-114.299	443.92	848.748	-36.7738	358.367	864.901	-69.3687	263.587	834.248	-68.3575	696.765	770.436	505.857	427.84	846.086	479.729	450.646	845.409	401.195	372.169	873.643	432.839	266.099	829.254	431.503
655	6.54	530.246	1293.9	213.342	562.842	1286.86	146.487	564.654	1287.16	281.9	664.914	1111.88	63.2731	690.21	1112.95	361.869	593.515	1062.02	215.391	705.007	775.111	-91.277	439.26	843.922	-114.296	443.949	848.707	-36.7873	358.379	864.85	-69.3982	263.584	834.26	-68.3549	696.779	770.421	505.861	427.87	846.061	479.732	450.699	845.321	401.202	372.167	873.627	432.833	266.12	829.228	431.501
656	6.55	530.348	1293.79	213.309	562.903	1286.79	146.407	564.694	1287.04	281.837	664.911	1111.85	63.2519	690.255	1112.91	361.804	593.664	1061.85	215.304	704.968	775.071	-91.3068	439.299	843.859	-114.358	443.993	848.626	-36.8637	358.44	864.781	-69.4745	263.608	834.262	-68.4001	696.752	770.387	505.846	427.9	846.026	479.702	450.707	845.211	401.132	372.183	873.61	432.811	266.215	829.194	431.441
657	6.56	530.406	1293.67	213.243	562.912	1286.73	146.37	564.655	1286.95	281.784	664.875	1111.81	63.2228	690.263	1112.89	361.764	593.762	1061.7	215.233	704.979	775.055	-91.3276	439.313	843.819	-114.415	444.05	848.555	-36.9351	358.483	864.716	-69.5353	263.621	834.251	-68.4225	696.731	770.367	505.824	427.877	845.999	479.666	450.697	845.168	401.061	372.193	873.595	432.794	266.169	829.206	431.429
658	6.57	530.335	1293.68	213.255	562.879	1286.72	146.399	564.609	1286.95	281.793	664.854	1111.81	63.2241	690.232	1112.89	361.781	593.701	1061.73	215.248	705.011	775.058	-91.3136	439.299	843.803	-114.377	444.065	848.534	-36.9091	358.458	864.711	-69.5234	263.586	834.258	-68.3733	696.745	770.377	505.811	427.819	846.005	479.661	450.661	845.18	401.062	372.145	873.6	432.809	266.019	829.25	431.495
659	6.58	530.211	1293.77	213.35	562.786	1286.77	146.526	564.613	1287.04	281.873	664.863	1111.86	63.2549	690.186	1112.9	361.838	593.595	1061.85	215.337	705.025	775.085	-91.3043	439.299	843.834	-114.322	443.983	848.576	-36.8252	358.444	864.756	-69.447	263.587	834.253	-68.3371	696.748	770.39	505.82	427.815	846.038	479.691	450.587	845.26	401.104	372.112	873.627	432.843	265.997	829.237	431.525
660	6.59	530.157	1293.84	213.382	562.721	1286.82	146.595	564.598	1287.13	281.949	664.849	1111.88	63.2782	690.164	1112.93	361.871	593.53	1061.94	215.41	704.993	775.115	-91.3155	439.273	843.882	-114.309	443.916	848.632	-36.786	358.417	864.804	-69.3845	263.614	834.224	-68.3609	696.753	770.413	505.848	427.808	846.062	479.726	450.532	845.362	401.137	372.087	873.626	432.849	266.05	829.183	431.511
661	6.6	530.09	1293.86	213.414	562.677	1286.89	146.605	564.577	1287.18	281.979	664.812	1111.89	63.2765	690.125	1112.94	361.876	593.468	1062.01	215.421	704.971	775.146	-91.3183	439.231	843.912	-114.3	443.916	848.674	-36.7886	358.369	864.857	-69.3658	263.635	834.214	-68.391	696.684	770.374	505.859	427.767	846.071	479.727	450.476	845.453	401.131	372.055	873.627	432.842	266.095	829.124	431.483
662	6.61	530.115	1293.87	213.426	562.702	1286.89	146.637	564.587	1287.16	281.978	664.814	1111.89	63.2781	690.121	1112.95	361.905	593.495	1062.03	215.424	704.954	775.136	-91.3135	439.269	843.906	-114.313	443.924	848.683	-36.7898	358.37	864.866	-69.3636	263.638	834.197	-68.3735	696.67	770.354	505.857	427.774	846.067	479.724	450.493	845.459	401.132	372.022	873.626	432.842	266.116	829.109	431.478
663	6.62	530.216	1293.81	213.426	562.747	1286.84	146.656	564.607	1287.11	281.991	664.842	1111.88	63.2826	690.144	1112.93	361.909	593.554	1062	215.424	704.957	775.107	-91.334	439.286	843.895	-114.312	443.918	848.67	-36.781	358.404	864.836	-69.3725	263.594	834.197	-68.3201	696.687	770.354	505.854	427.815	846.055	479.738	450.559	845.42	401.155	372.053	873.616	432.852	266.148	829.125	431.5
664	6.63	530.25	1293.74	213.431	562.737	1286.8	146.636	564.635	1287.08	281.993	664.86	1111.88	63.2824	690.179	1112.91	361.891	593.61	1061.93	215.391	704.941	775.069	-91.3481	439.267	843.874	-114.311	443.917	848.633	-36.8021	358.42	864.815	-69.4085	263.565	834.239	-68.3155	696.677	770.347	505.852	427.852	846.045	479.739	450.597	845.356	401.152	372.089	873.621	432.854	266.1	829.195	431.502
665	6.64	530.222	1293.73	213.414	562.768	1286.77	146.597	564.643	1287.03	281.94	664.882	1111.86	63.2607	690.205	1112.88	361.849	593.626	1061.88	215.325	704.922	775.037	-91.3401	439.287	843.843	-114.367	443.946	848.607	-36.8601	358.436	864.789	-69.4639	263.586	834.231	-68.3615	696.704	770.361	505.84	427.838	846.029	479.7	450.624	845.267	401.114	372.118	873.614	432.822	266.016	829.265	431.495
666	6.65	530.247	1293.72	213.403	562.738	1286.74	146.602	564.61	1286.99	281.914	664.899	1111.85	63.2471	690.233	1112.88	361.834	593.652	1061.86	215.296	704.961	775.052	-91.321	439.304	843.83	-114.381	443.996	848.604	-36.8831	358.469	864.771	-69.5	263.62	834.247	-68.3805	696.752	770.375	505.817	427.862	846.028	479.685	450.67	845.208	401.101	372.158	873.61	432.802	266.01	829.277	431.5
667	6.66	530.258	1293.73	213.44	562.751	1286.75	146.615	564.612	1286.98	281.924	664.924	1111.86	63.2596	690.247	1112.9	361.852	593.697	1061.85	215.318	705.023	775.085	-91.292	439.304	843.838	-114.347	444.034	848.613	-36.8772	358.492	864.768	-69.4774	263.615	834.263	-68.3649	696.79	770.388	505.819	427.879	846.045	479.701	450.674	845.197	401.116	372.2	873.624	432.823	266.037	829.312	431.523
668	6.67	530.213	1293.72	213.474	562.769	1286.77	146.613	564.656	1286.98	281.954	664.932	1111.88	63.2725	690.234	1112.89	361.857	593.68	1061.87	215.342	704.978	775.083	-91.3066	439.287	843.854	-114.348	444.007	848.63	-36.87	358.499	864.779	-69.467	263.611	834.254	-68.3671	696.77	770.377	505.818	427.874	846.046	479.706	450.685	845.209	401.13	372.224	873.637	432.84	266.112	829.295	431.51
669	6.68	530.254	1293.71	213.453	562.792	1286.82	146.621	564.672	1287.02	281.971	664.934	1111.89	63.271	690.238	1112.88	361.844	593.726	1061.87	215.343	704.97	775.111	-91.3082	439.297	843.862	-114.364	444.025	848.624	-36.8796	358.495	864.796	-69.4699	263.568	834.265	-68.3579	696.748	770.373	505.813	427.856	846.042	479.693	450.677	845.262	401.107	372.193	873.635	432.832	266.146	829.236	431.472
670	6.69	530.237	1293.74	213.445	562.787	1286.84	146.643	564.636	1287.08	281.999	664.92	1111.91	63.2618	690.257	1112.91	361.856	593.674	1061.92	215.358	705.006	775.162	-91.3123	439.275	843.903	-114.343	443.979	848.648	-36.8469	358.465	864.817	-69.4483	263.574	834.271	-68.3466	696.743	770.362	505.809	427.83	846.053	479.696	450.636	845.338	401.102	372.142	873.626	432.823	266.122	829.209	431.472
671	6.7	530.225	1293.79	213.491	562.764	1286.87	146.693	564.609	1287.13	282.038	664.91	1111.92	63.2826	690.205	1112.91	361.899	593.549	1061.99	215.409	704.998	775.187	-91.3139	439.255	843.924	-114.292	443.947	848.674	-36.7954	358.407	864.863	-69.3881	263.616	834.27	-68.3425	696.716	770.352	505.804	427.812	846.067	479.711	450.588	845.411	401.139	372.111	873.631	432.837	266.023	829.24	431.529
672	6.71	530.179	1293.83	213.504	562.723	1286.91	146.724	564.604	1287.14	282.038	664.891	1111.91	63.3018	690.142	1112.93	361.92	593.452	1062.05	215.441	705.02	775.207	-91.3013	439.235	843.93	-114.253	443.924	848.7	-36.7747	358.349	864.889	-69.3508	263.582	834.257	-68.3382	696.698	770.344	505.797	427.807	846.071	479.731	450.516	845.449	401.161	372.072	873.629	432.85	266.072	829.21	431.54
673	6.72	530.146	1293.83	213.469	562.734	1286.91	146.707	564.561	1287.15	282.011	664.866	1111.9	63.2874	690.143	1112.91	361.897	593.455	1062.03	215.418	705.008	775.187	-91.3057	439.237	843.906	-114.289	443.903	848.678	-36.7862	358.353	864.863	-69.3816	263.537	834.255	-68.3388	696.673	770.305	505.796	427.799	846.065	479.717	450.525	845.436	401.145	372.059	873.614	432.832	266.056	829.186	431.504
674	6.73	530.227	1293.8	213.448	562.791	1286.85	146.673	564.586	1287.08	281.98	664.874	1111.88	63.2801	690.188	1112.88	361.895	593.539	1061.92	215.386	705.04	775.153	-91.3085	439.258	843.871	-114.338	443.91	848.634	-36.8144	358.385	864.807	-69.4285	263.572	834.257	-68.3431	696.714	770.304	505.799	427.794	846.031	479.7	450.562	845.356	401.114	372.088	873.608	432.827	266.039	829.21	431.494
675	6.74	530.336	1293.75	213.46	562.847	1286.8	146.664	564.654	1287.01	281.977	664.893	1111.86	63.292	690.24	1112.86	361.881	593.65	1061.84	215.368	705.024	775.125	-91.2966	439.292	843.842	-114.339	443.989	848.574	-36.8468	358.445	864.741	-69.4497	263.571	834.263	-68.3085	696.721	770.313	505.813	427.832	846.007	479.713	450.61	845.26	401.102	372.133	873.608	432.842	266.07	829.202	431.512
676	6.75	530.344	1293.76	213.484	562.887	1286.78	146.666	564.72	1287	281.996	664.899	1111.85	63.3079	690.277	1112.86	361.877	593.705	1061.79	215.372	705.004	775.097	-91.3096	439.3	843.816	-114.34	444.005	848.56	-36.8472	358.469	864.734	-69.4537	263.611	834.251	-68.3202	696.758	770.318	505.812	427.867	845.993	479.724	450.668	845.209	401.114	372.176	873.594	432.847	266.086	829.198	431.497
677	6.76	530.28	1293.77	213.478	562.862	1286.81	146.679	564.745	1287.03	282.012	664.903	1111.85	63.2955	690.248	1112.87	361.883	593.693	1061.82	215.365	705.003	775.098	-91.3423	439.302	843.814	-114.351	443.988	848.576	-36.8621	358.469	864.758	-69.4637	263.615	834.222	-68.3576	696.729	770.304	505.806	427.882	845.99	479.709	450.674	845.216	401.115	372.199	873.597	432.842	266.1	829.183	431.483
678	6.77	530.259	1293.83	213.5	562.861	1286.84	146.682	564.745	1287.09	282.031	664.894	1111.86	63.2931	690.24	1112.9	361.886	593.625	1061.9	215.377	705.009	775.11	-91.3426	439.281	843.834	-114.346	443.997	848.592	-36.8618	358.456	864.771	-69.4668	263.665	834.188	-68.397	696.757	770.333	505.803	427.876	846.014	479.707	450.639	845.26	401.12	372.197	873.611	432.841	266.087	829.192	431.466
679	6.78	530.266	1293.91	213.511	562.831	1286.9	146.702	564.737	1287.15	282.053	664.887	1111.87	63.3051	690.269	1112.95	361.929	593.569	1061.96	215.419	705.018	775.124	-91.3199	439.302	843.859	-114.327	443.981	848.614	-36.8333	358.422	864.802	-69.4319	263.675	834.197	-68.3883	696.787	770.355	505.817	427.866	846.032	479.731	450.641	845.298	401.156	372.16	873.618	432.849	266.02	829.262	431.52
680	6.79	530.296	1293.94	213.51	562.828	1286.93	146.733	564.765	1287.18	282.06	664.874	1111.88	63.3187	690.268	1112.96	361.938	593.568	1061.99	215.453	704.998	775.146	-91.3206	439.304	843.862	-114.306	443.939	848.638	-36.7991	358.437	864.827	-69.4179	263.703	834.199	-68.3775	696.809	770.398	505.82	427.87	846.059	479.73	450.629	845.345	401.159	372.151	873.634	432.851	265.984	829.307	431.551
681	6.8	530.299	1293.94	213.497	562.903	1286.95	146.686	564.762	1287.19	282.045	664.86	1111.9	63.3056	690.226	1112.95	361.927	593.545	1061.99	215.449	704.96	775.172	-91.3226	439.285	843.873	-114.313	443.942	848.633	-36.797	358.432	864.834	-69.433	263.641	834.225	-68.3601	696.79	770.425	505.826	427.866	846.076	479.723	450.589	845.367	401.137	372.11	873.657	432.859	265.985	829.301	431.553
682	6.81	530.27	1293.95	213.48	562.893	1286.93	146.678	564.685	1287.21	282.033	664.853	1111.9	63.3026	690.192	1112.95	361.931	593.547	1061.96	215.425	704.959	775.178	-91.3083	439.29	843.87	-114.319	443.953	848.65	-36.8227	358.425	864.833	-69.4531	263.611	834.241	-68.3713	696.76	770.433	505.84	427.835	846.082	479.714	450.585	845.358	401.118	372.093	873.662	432.852	266.089	829.278	431.517
683	6.82	530.301	1293.95	213.488	562.883	1286.93	146.692	564.731	1287.2	282.037	664.874	1111.89	63.3131	690.218	1112.95	361.92	593.576	1061.92	215.416	705.003	775.187	-91.2698	439.305	843.888	-114.31	443.955	848.655	-36.813	358.437	864.828	-69.4322	263.541	834.251	-68.3408	696.769	770.433	505.852	427.837	846.083	479.721	450.59	845.346	401.123	372.115	873.645	432.842	266.14	829.238	431.487
684	6.83	530.332	1293.93	213.513	562.911	1286.93	146.691	564.765	1287.2	282.055	664.909	1111.88	63.3298	690.226	1112.94	361.924	593.6	1061.9	215.436	705.033	775.178	-91.2657	439.299	843.89	-114.303	443.945	848.647	-36.7912	358.436	864.827	-69.3989	263.54	834.266	-68.321	696.793	770.418	505.87	427.874	846.059	479.742	450.612	845.331	401.143	372.172	873.631	432.843	266.171	829.182	431.479
685	6.84	530.33	1293.92	213.496	562.895	1286.92	146.698	564.773	1287.19	282.052	664.917	1111.88	63.3267	690.216	1112.91	361.922	593.639	1061.89	215.442	705.029	775.159	-91.2752	439.254	843.889	-114.324	443.933	848.651	-36.7897	358.447	864.835	-69.4055	263.586	834.254	-68.3473	696.766	770.39	505.88	427.89	846.031	479.744	450.639	845.329	401.144	372.21	873.616	432.842	266.241	829.123	431.45
686	6.85	530.316	1293.9	213.458	562.81	1286.92	146.704	564.78	1287.17	282.038	664.905	1111.87	63.3091	690.196	1112.88	361.929	593.594	1061.89	215.425	705.022	775.114	-91.2507	439.232	843.881	-114.321	443.913	848.646	-36.7899	358.419	864.832	-69.4102	263.521	834.249	-68.3197	696.73	770.35	505.873	427.862	846.007	479.723	450.653	845.302	401.155	372.193	873.599	432.84	266.151	829.165	431.459
687	6.86	530.287	1293.9	213.454	562.825	1286.9	146.686	564.772	1287.15	282.017	664.916	1111.86	63.3117	690.217	1112.87	361.928	593.592	1061.87	215.429	705.06	775.108	-91.2326	439.277	843.862	-114.303	443.927	848.62	-36.7845	358.417	864.82	-69.4017	263.566	834.224	-68.3173	696.723	770.332	505.87	427.853	846	479.721	450.677	845.285	401.163	372.189	873.575	432.833	266.068	829.2	431.496
688	6.87	530.279	1293.89	213.434	562.878	1286.88	146.645	564.73	1287.14	282	664.925	1111.86	63.3114	690.252	1112.88	361.902	593.591	1061.85	215.416	705.063	775.123	-91.2455	439.298	843.861	-114.314	443.969	848.611	-36.8133	358.45	864.791	-69.4301	263.615	834.246	-68.3423	696.739	770.332	505.874	427.85	846	479.715	450.669	845.294	401.148	372.189	873.579	432.826	266.1	829.196	431.5
689	6.88	530.285	1293.91	213.386	562.859	1286.88	146.613	564.683	1287.15	281.97	664.927	1111.87	63.2995	690.261	1112.87	361.892	593.575	1061.84	215.374	705.041	775.12	-91.2604	439.292	843.868	-114.343	443.962	848.605	-36.8362	358.478	864.773	-69.4687	263.589	834.262	-68.3597	696.745	770.348	505.877	427.82	846.012	479.697	450.633	845.291	401.135	372.168	873.592	432.811	266.054	829.217	431.507
690	6.89	530.28	1293.92	213.381	562.868	1286.88	146.581	564.647	1287.17	281.948	664.936	1111.88	63.2851	690.231	1112.89	361.894	593.592	1061.84	215.332	705.03	775.115	-91.2861	439.269	843.878	-114.354	443.936	848.612	-36.8318	358.458	864.777	-69.4957	263.587	834.272	-68.3658	696.74	770.367	505.863	427.801	846.026	479.68	450.604	845.3	401.122	372.151	873.619	432.803	266.087	829.196	431.478
691	6.9	530.279	1293.9	213.398	562.894	1286.89	146.606	564.632	1287.18	281.959	664.961	1111.89	63.29	690.217	1112.91	361.898	593.638	1061.84	215.355	705.036	775.126	-91.2865	439.251	843.888	-114.344	443.938	848.629	-36.8114	358.433	864.792	-69.4579	263.596	834.275	-68.347	696.745	770.39	505.865	427.818	846.056	479.691	450.586	845.335	401.117	372.138	873.64	432.823	266.058	829.253	431.502
692	6.91	530.32	1293.9	213.435	563.01	1286.89	146.614	564.686	1287.17	281.991	664.962	1111.9	63.3096	690.252	1112.92	361.905	593.668	1061.85	215.389	705.028	775.152	-91.2982	439.279	843.888	-114.33	443.983	848.631	-36.8161	358.469	864.8	-69.4377	263.667	834.247	-68.3685	696.767	770.397	505.898	427.855	846.088	479.723	450.557	845.361	401.112	372.131	873.654	432.832	266.098	829.269	431.511
693	6.92	530.404	1293.89	213.415	563.029	1286.88	146.587	564.717	1287.17	281.998	664.961	1111.89	63.298	690.265	1112.92	361.885	593.666	1061.86	215.378	705.01	775.155	-91.325	439.285	843.89	-114.349	444.047	848.63	-36.8644	358.494	864.807	-69.4607	263.648	834.243	-68.37	696.775	770.411	505.903	427.836	846.093	479.729	450.502	845.382	401.082	372.115	873.662	432.833	266.142	829.254	431.489
694	6.93	530.423	1293.92	213.388	562.998	1286.91	146.566	564.715	1287.17	281.984	664.95	1111.9	63.2677	690.292	1112.91	361.865	593.609	1061.89	215.355	705.001	775.144	-91.362	439.318	843.886	-114.372	444.033	848.64	-36.884	358.481	864.818	-69.4759	263.621	834.252	-68.3991	696.744	770.395	505.89	427.809	846.089	479.704	450.519	845.392	401.065	372.095	873.657	432.826	266.087	829.235	431.497
695	6.94	530.387	1293.93	213.423	563.008	1286.92	146.6	564.755	1287.16	282.004	664.968	1111.9	63.2718	690.308	1112.9	361.889	593.586	1061.92	215.37	705.026	775.124	-91.3831	439.331	843.885	-114.352	444.033	848.653	-36.8585	358.461	864.827	-69.4338	263.634	834.237	-68.391	696.736	770.376	505.893	427.811	846.075	479.716	450.589	845.381	401.124	372.106	873.653	432.837	266.08	829.214	431.497
696	6.95	530.386	1293.94	213.472	562.966	1286.91	146.668	564.822	1287.16	282.022	664.979	1111.89	63.2939	690.303	1112.91	361.935	593.606	1061.93	215.415	705.021	775.129	-91.3659	439.342	843.9	-114.328	443.992	848.663	-36.803	358.454	864.843	-69.3844	263.611	834.236	-68.3449	696.742	770.375	505.888	427.868	846.071	479.751	450.658	845.35	401.183	372.144	873.652	432.866	266.185	829.189	431.503
697	6.96	530.348	1293.95	213.475	562.923	1286.9	146.674	564.847	1287.14	282.001	664.972	1111.88	63.2832	690.273	1112.91	361.91	593.61	1061.91	215.404	704.992	775.117	-91.3911	439.307	843.897	-114.329	443.958	848.652	-36.8004	358.445	864.832	-69.3927	263.612	834.23	-68.3469	696.729	770.364	505.869	427.89	846.061	479.75	450.695	845.326	401.19	372.165	873.638	432.858	266.114	829.227	431.527
698	6.97	530.289	1293.91	213.442	562.926	1286.85	146.624	564.828	1287.11	281.957	664.964	1111.87	63.2495	690.265	1112.89	361.846	593.677	1061.84	215.337	705.003	775.127	-91.4003	439.284	843.883	-114.358	443.952	848.624	-36.8511	358.441	864.807	-69.4521	263.612	834.241	-68.367	696.735	770.371	505.839	427.879	846.044	479.718	450.712	845.281	401.153	372.186	873.627	432.83	265.996	829.261	431.519
699	6.98	530.298	1293.89	213.419	562.94	1286.84	146.597	564.828	1287.09	281.937	664.98	1111.88	63.2523	690.308	1112.89	361.849	593.701	1061.81	215.329	705.044	775.14	-91.3908	439.282	843.878	-114.363	443.993	848.601	-36.8653	358.466	864.799	-69.4771	263.623	834.255	-68.3515	696.794	770.401	505.831	427.873	846.039	479.709	450.696	845.266	401.132	372.194	873.64	432.841	266.102	829.224	431.496
700	6.99	530.339	1293.9	213.415	562.972	1286.87	146.599	564.811	1287.12	281.944	664.989	1111.88	63.2589	690.327	1112.9	361.866	593.694	1061.81	215.346	705.069	775.154	-91.3587	439.288	843.87	-114.357	444.003	848.609	-36.8444	358.479	864.798	-69.4606	263.636	834.266	-68.3213	696.837	770.424	505.84	427.88	846.05	479.718	450.651	845.285	401.12	372.194	873.648	432.862	266.19	829.221	431.49
701	7	530.321	1293.92	213.417	562.933	1286.88	146.577	564.766	1287.16	281.918	664.937	1111.89	63.2363	690.297	1112.92	361.839	593.672	1061.82	215.331	705.047	775.14	-91.3735	439.263	843.886	-114.336	443.963	848.628	-36.8427	358.443	864.81	-69.4583	263.578	834.285	-68.2906	696.805	770.428	505.819	427.872	846.074	479.698	450.601	845.307	401.101	372.167	873.656	432.849	266.146	829.213	431.49
702	7.01	530.327	1293.95	213.379	562.904	1286.89	146.53	564.754	1287.19	281.887	664.909	1111.9	63.2066	690.287	1112.94	361.816	593.617	1061.86	215.307	705.042	775.138	-91.3882	439.269	843.884	-114.372	443.932	848.649	-36.8664	358.404	864.835	-69.4809	263.589	834.286	-68.3197	696.767	770.423	505.787	427.844	846.088	479.673	450.586	845.337	401.095	372.165	873.663	432.825	266.103	829.204	431.472
703	7.02	530.309	1293.98	213.366	562.967	1286.94	146.509	564.763	1287.22	281.885	664.931	1111.89	63.2048	690.278	1112.95	361.822	593.612	1061.9	215.316	705.029	775.133	-91.3523	439.292	843.889	-114.368	443.962	848.656	-36.8526	358.415	864.837	-69.4745	263.688	834.266	-68.3872	696.803	770.441	505.79	427.847	846.092	479.689	450.591	845.36	401.102	372.115	873.648	432.811	266.021	829.23	431.503
704	7.03	530.303	1294.02	213.375	562.995	1286.97	146.533	564.774	1287.23	281.9	664.952	1111.89	63.2319	690.287	1112.94	361.838	593.588	1061.94	215.35	704.987	775.106	-91.3322	439.278	843.9	-114.345	443.972	848.667	-36.8199	358.419	864.832	-69.4269	263.67	834.235	-68.3809	696.824	770.433	505.806	427.843	846.084	479.711	450.578	845.363	401.108	372.106	873.628	432.821	266.04	829.239	431.516
705	7.04	530.339	1294.03	213.351	562.999	1286.99	146.494	564.76	1287.23	281.878	664.943	1111.88	63.2231	690.258	1112.93	361.825	593.579	1061.95	215.34	704.985	775.09	-91.3581	439.245	843.898	-114.34	443.945	848.657	-36.8156	358.392	864.83	-69.4264	263.555	834.247	-68.3457	696.769	770.407	505.802	427.827	846.06	479.691	450.583	845.363	401.108	372.12	873.614	432.811	266.043	829.223	431.489
706	7.05	530.372	1294.01	213.322	563.033	1286.96	146.447	564.745	1287.22	281.867	664.947	1111.87	63.2008	690.258	1112.92	361.795	593.635	1061.91	215.318	704.992	775.096	-91.3551	439.255	843.89	-114.349	443.95	848.637	-36.8388	358.404	864.816	-69.4538	263.53	834.244	-68.3475	696.73	770.376	505.796	427.811	846.034	479.676	450.645	845.33	401.113	372.141	873.609	432.8	266.035	829.22	431.495
707	7.06	530.413	1293.99	213.346	563.104	1286.93	146.466	564.769	1287.21	281.886	664.958	1111.87	63.2161	690.269	1112.92	361.814	593.708	1061.86	215.337	705.025	775.101	-91.3653	439.288	843.876	-114.344	444.013	848.623	-36.8376	358.449	864.8	-69.4511	263.577	834.219	-68.3324	696.743	770.376	505.807	427.878	846.026	479.709	450.68	845.301	401.13	372.187	873.606	432.814	266.076	829.22	431.515
708	7.07	530.435	1293.97	213.384	563.161	1286.89	146.48	564.891	1287.22	281.93	664.991	1111.86	63.252	690.294	1112.93	361.844	593.719	1061.87	215.371	705.037	775.095	-91.3438	439.29	843.879	-114.315	444.1	848.628	-36.8232	358.482	864.794	-69.3967	263.602	834.253	-68.326	696.785	770.389	505.83	427.926	846.016	479.758	450.71	845.299	401.164	372.221	873.593	432.831	266.178	829.213	431.545
[truncated: 3 more columns]

## Sheet: Trial01
PathFileType	4	(X/Y/Z)	Trial01.trc
DataRate	CameraRate	NumFrames	NumMarkers	Units	OrigDataRate	OrigDataStartFrame	OrigNumFrames
100	100	1170	16	mm	100	1	1170
Frame#	Time	nasion			r zyg pr			l zyg pr			r should			l should			sternum			r elbow			r ulna			r radius			r hand			r finger			l elbow			l ulna			l radius			l hand			l finger
		X1	Y1	Z1	X2	Y2	Z2	X3	Y3	Z3	X4	Y4	Z4	X5	Y5	Z5	X6	Y6	Z6	X7	Y7	Z7	X8	Y8	Z8	X9	Y9	Z9	X10	Y10	Z10	X11	Y11	Z11	X12	Y12	Z12	X13	Y13	Z13	X14	Y14	Z14	X15	Y15	Z15	X16	Y16	Z16
1	0	568.651	1306.67	208.615	604.856	1298.16	142.227	601.515	1292.73	278.58	687.059	1126.05	65.8073	720.213	1117.8	345.67	607.205	1072.64	210.388	719.096	790.409	-93.4101	449.845	839.469	-101.614	460.044	850.256	-24.9188	371.365	864.311	-51.1966	276.336	834.295	-36.9652	699.146	790.039	513.629	430.194	842.772	455.058	466.429	845.604	380.732	383.745	876.449	397.886	299.547	822.312	365.806
2	0.01	568.827	1306.75	208.623	604.952	1298.28	142.285	601.647	1292.85	278.57	687.186	1126.1	65.7916	720.366	1117.81	345.641	607.156	1072.76	210.374	719.05	790.415	-93.4684	449.827	839.493	-101.617	459.999	850.298	-24.8862	371.379	864.31	-51.1623	276.333	834.303	-36.944	699.231	790.091	513.603	430.228	842.785	455.078	466.581	844.979	381.141	383.747	876.481	397.907	299.476	822.367	365.879
3	0.02	568.964	1306.91	208.612	605.08	1298.4	142.297	601.767	1292.96	278.561	687.299	1126.12	65.7636	720.464	1117.82	345.569	607.153	1072.85	210.337	719.041	790.424	-93.5027	449.801	839.54	-101.61	460.015	850.311	-24.913	371.348	864.333	-51.1536	276.356	834.29	-36.9611	699.252	790.099	513.572	430.231	842.801	455.069	466.589	844.844	381.228	383.743	876.508	397.925	299.544	822.331	365.857
4	0.03	569.09	1307.06	208.593	605.235	1298.5	142.282	601.87	1293.08	278.556	687.39	1126.14	65.7166	720.517	1117.82	345.512	607.262	1072.84	210.253	719.02	790.434	-93.5566	449.841	839.545	-101.628	460.008	850.315	-24.9458	371.327	864.326	-51.1723	276.374	834.283	-37.0125	699.259	790.1	513.527	430.238	842.802	455.048	466.573	844.812	381.22	383.726	876.527	397.923	299.55	822.325	365.821
5	0.04	569.223	1307.2	208.594	605.404	1298.6	142.278	601.998	1293.18	278.556	687.47	1126.13	65.6775	720.583	1117.8	345.479	607.337	1072.8	210.167	718.977	790.417	-93.6208	449.837	839.538	-101.644	459.97	850.314	-24.9614	371.337	864.289	-51.1845	276.417	834.252	-37.0469	699.269	790.073	513.46	430.267	842.791	455.036	466.555	844.8	381.193	383.741	876.535	397.923	299.495	822.319	365.836
6	0.05	569.305	1307.34	208.621	605.541	1298.73	142.313	602.117	1293.26	278.56	687.546	1126.12	65.6454	720.623	1117.78	345.461	607.427	1072.73	210.106	718.973	790.422	-93.6672	449.817	839.505	-101.654	459.994	850.297	-24.959	371.368	864.288	-51.1939	276.4	834.257	-37.011	699.286	790.046	513.405	430.298	842.791	455.05	466.549	844.778	381.179	383.764	876.526	397.939	299.505	822.317	365.856
7	0.06	569.428	1307.53	208.654	605.687	1298.84	142.336	602.232	1293.33	278.556	687.615	1126.11	65.6084	720.659	1117.77	345.437	607.462	1072.68	210.053	718.968	790.433	-93.7028	449.813	839.481	-101.646	460.018	850.293	-24.9659	371.367	864.267	-51.2245	276.394	834.263	-37.0144	699.317	790.011	513.343	430.319	842.794	455.046	466.521	844.753	381.161	383.781	876.502	397.93	299.456	822.333	365.888
8	0.07	569.643	1307.68	208.633	605.805	1298.94	142.365	602.334	1293.43	278.533	687.62	1126.09	65.5675	720.674	1117.76	345.42	607.494	1072.63	209.964	718.941	790.388	-93.7463	449.848	839.455	-101.702	459.988	850.29	-24.9849	371.378	864.245	-51.2581	276.361	834.275	-37.0023	699.359	789.964	513.265	430.311	842.79	455.027	466.505	844.727	381.137	383.766	876.485	397.928	299.428	822.349	365.868
9	0.08	569.205	1308.06	208.818	605.926	1299.05	142.394	602.472	1293.53	278.524	687.662	1126.09	65.5261	720.699	1117.74	345.403	607.462	1072.63	209.912	718.911	790.345	-93.7474	449.856	839.435	-101.724	460.008	850.294	-25.0167	371.379	864.25	-51.2715	276.368	834.263	-37.0266	699.384	789.933	513.213	430.321	842.799	455.021	466.531	844.726	381.134	383.755	876.492	397.936	299.386	822.409	365.882
10	0.09	567.955	1308.73	209.308	606.076	1299.2	142.461	602.616	1293.64	278.53	687.691	1126.09	65.5024	720.73	1117.72	345.402	607.465	1072.64	209.923	718.952	790.357	-93.7151	449.881	839.455	-101.711	460.035	850.299	-24.9966	371.357	864.272	-51.244	276.342	834.26	-37.0104	699.419	789.933	513.159	430.356	842.808	455.025	466.557	844.721	381.163	383.767	876.5	397.949	299.399	822.461	365.888
11	0.1	567.782	1309.01	209.42	606.228	1299.35	142.517	602.76	1293.76	278.55	687.729	1126.1	65.5002	720.758	1117.74	345.391	607.436	1072.69	209.914	718.992	790.348	-93.6812	449.861	839.491	-101.665	460.017	850.312	-24.9747	371.338	864.295	-51.2106	276.332	834.283	-36.9853	699.45	789.935	513.095	430.352	842.803	455.023	466.61	844.709	381.2	383.755	876.524	397.963	299.382	822.487	365.886
12	0.11	567.854	1309.15	209.422	606.359	1299.47	142.539	602.913	1293.86	278.537	687.722	1126.13	65.4867	720.763	1117.76	345.379	607.374	1072.75	209.904	718.988	790.353	-93.6571	449.846	839.503	-101.665	460.01	850.325	-24.9818	371.326	864.321	-51.2097	276.32	834.304	-37.0019	699.443	789.917	513.048	430.325	842.797	455.016	466.6	844.729	381.178	383.741	876.541	397.958	299.441	822.421	365.845
13	0.12	568.023	1309.23	209.46	606.455	1299.55	142.564	603.081	1293.96	278.541	687.725	1126.14	65.4717	720.745	1117.76	345.364	607.345	1072.78	209.901	718.974	790.364	-93.6319	449.863	839.533	-101.687	459.97	850.323	-24.9765	371.336	864.349	-51.197	276.354	834.287	-37.0127	699.445	789.91	513.017	430.306	842.796	455.009	466.579	844.768	381.163	383.73	876.555	397.974	299.518	822.364	365.862
14	0.13	568.217	1309.28	209.475	606.564	1299.63	142.602	603.199	1294.02	278.553	687.725	1126.14	65.4787	720.757	1117.78	345.392	607.351	1072.8	209.935	719.013	790.375	-93.58	449.854	839.551	-101.646	459.961	850.322	-24.9468	371.321	864.354	-51.1604	276.388	834.253	-37.0267	699.458	789.912	513.012	430.279	842.8	455.021	466.548	844.804	381.175	383.733	876.561	398.004	299.51	822.349	365.869
15	0.14	568.364	1309.36	209.485	606.645	1299.65	142.632	603.297	1294.09	278.538	687.716	1126.13	65.475	720.797	1117.78	345.41	607.354	1072.79	209.952	719.018	790.359	-93.5529	449.831	839.543	-101.625	459.96	850.309	-24.9179	371.297	864.333	-51.1507	276.362	834.255	-36.9931	699.463	789.914	513.021	430.261	842.797	455.045	466.508	844.803	381.168	383.7	876.55	398.007	299.41	822.337	365.889
16	0.15	568.461	1309.46	209.482	606.716	1299.66	142.618	603.446	1294.18	278.508	687.743	1126.1	65.4478	720.802	1117.77	345.389	607.439	1072.76	209.913	719.016	790.333	-93.5375	449.801	839.527	-101.661	459.956	850.282	-24.9266	371.316	864.316	-51.1708	276.349	834.256	-36.9994	699.465	789.927	513.01	430.252	842.789	455.041	466.484	844.772	381.144	383.671	876.531	397.98	299.364	822.31	365.892
17	0.16	568.646	1309.53	209.444	606.811	1299.68	142.609	603.606	1294.23	278.456	687.786	1126.1	65.4226	720.807	1117.76	345.375	607.52	1072.74	209.886	719.012	790.306	-93.5339	449.802	839.48	-101.65	459.982	850.268	-24.9339	371.348	864.287	-51.1944	276.297	834.259	-36.999	699.448	789.932	513.004	430.255	842.777	455.026	466.498	844.74	381.133	383.693	876.505	397.958	299.445	822.274	365.865
18	0.17	568.724	1309.64	209.449	606.896	1299.71	142.621	603.706	1294.29	278.456	687.84	1126.1	65.426	720.847	1117.76	345.388	607.522	1072.74	209.904	718.931	790.308	-93.3825	449.83	839.47	-101.618	459.973	850.263	-24.8914	371.346	864.295	-51.1871	276.265	834.287	-36.9505	699.449	789.942	513.024	430.313	842.781	455.046	466.513	844.729	381.163	383.713	876.489	397.959	299.396	822.348	365.888
19	0.18	568.797	1309.69	209.427	606.924	1299.77	142.644	603.756	1294.37	278.461	687.85	1126.11	65.4467	720.854	1117.74	345.404	607.47	1072.79	209.939	718.865	790.33	-93.1664	449.863	839.464	-101.605	459.951	850.267	-24.8788	371.315	864.319	-51.1667	276.352	834.286	-36.9824	699.454	789.955	513.056	430.34	842.791	455.057	466.543	844.736	381.211	383.724	876.502	397.974	299.334	822.402	365.916
20	0.19	568.838	1309.76	209.389	606.936	1299.8	142.636	603.789	1294.46	278.44	687.821	1126.12	65.4522	720.849	1117.74	345.419	607.412	1072.83	209.935	719.026	790.269	-93.3416	449.869	839.485	-101.61	459.949	850.28	-24.9	371.321	864.331	-51.1817	276.395	834.277	-37.0255	699.444	789.945	513.075	430.304	842.783	455.048	466.58	844.748	381.218	383.722	876.52	397.969	299.335	822.389	365.893
21	0.2	568.869	1309.84	209.346	606.992	1299.84	142.603	603.836	1294.54	278.429	687.813	1126.12	65.4502	720.812	1117.74	345.427	607.376	1072.84	209.933	719.076	790.231	-93.3763	449.874	839.507	-101.634	459.973	850.284	-24.9209	371.335	864.336	-51.1908	276.379	834.268	-37.0239	699.424	789.91	513.108	430.279	842.779	455.028	466.6	844.757	381.196	383.745	876.533	397.969	299.438	822.364	365.859
22	0.21	569.133	1309.82	209.269	607.097	1299.89	142.576	603.859	1294.62	278.419	687.808	1126.14	65.4741	720.811	1117.72	345.435	607.344	1072.84	209.958	719.125	790.239	-93.3452	449.877	839.533	-101.625	459.983	850.268	-24.905	371.342	864.335	-51.1812	276.419	834.248	-37.0262	699.427	789.879	513.145	430.303	842.769	455.039	466.608	844.774	381.187	383.764	876.561	397.987	299.605	822.307	365.822
23	0.22	569.136	1309.89	209.255	607.175	1299.91	142.571	603.823	1294.71	278.424	687.771	1126.15	65.5198	720.809	1117.7	345.464	607.322	1072.85	209.993	719.178	790.26	-93.3092	449.87	839.557	-101.595	459.992	850.256	-24.8835	371.35	864.336	-51.1714	276.395	834.227	-37.0154	699.429	789.857	513.169	430.314	842.754	455.068	466.631	844.772	381.232	383.785	876.559	398.01	299.599	822.308	365.845
24	0.23	569.087	1309.98	209.214	607.228	1299.93	142.529	603.804	1294.74	278.389	687.743	1126.14	65.5438	720.778	1117.68	345.492	607.294	1072.85	210.039	719.193	790.267	-93.3081	449.856	839.53	-101.592	460.001	850.235	-24.896	371.373	864.328	-51.1771	276.358	834.213	-36.9906	699.399	789.813	513.185	430.287	842.735	455.074	466.638	844.765	381.258	383.772	876.555	398.027	299.575	822.305	365.844
25	0.24	569.223	1309.99	209.14	607.317	1299.92	142.461	603.842	1294.76	278.334	687.681	1126.14	65.5514	720.772	1117.63	345.506	607.318	1072.82	210.041	719.16	790.257	-93.3172	449.873	839.487	-101.589	459.991	850.226	-24.8789	371.383	864.293	-51.1769	276.385	834.206	-37.0231	699.403	789.769	513.179	430.305	842.732	455.074	466.606	844.751	381.231	383.761	876.524	398.012	299.576	822.326	365.855
26	0.25	569.297	1310.02	209.094	607.427	1299.91	142.409	603.827	1294.81	278.294	687.62	1126.14	65.5792	720.787	1117.6	345.548	607.324	1072.79	210.072	719.154	790.286	-93.3221	449.901	839.454	-101.608	460.015	850.217	-24.8628	371.409	864.285	-51.1728	276.453	834.199	-37.0696	699.433	789.742	513.176	430.343	842.735	455.078	466.586	844.726	381.204	383.77	876.497	397.999	299.566	822.354	365.88
27	0.26	569.29	1310.06	209.036	607.437	1299.92	142.386	603.768	1294.85	278.282	687.549	1126.15	65.633	720.788	1117.6	345.572	607.332	1072.79	210.134	719.153	790.314	-93.3212	449.887	839.45	-101.595	460	850.217	-24.8557	371.409	864.271	-51.1592	276.413	834.219	-37.0301	699.415	789.681	513.177	430.366	842.739	455.095	466.566	844.723	381.206	383.794	876.474	398.008	299.597	822.315	365.879
28	0.27	569.292	1310.03	208.944	607.415	1299.91	142.36	603.752	1294.87	278.269	687.506	1126.17	65.6813	720.789	1117.58	345.612	607.284	1072.84	210.206	719.135	790.346	-93.3253	449.868	839.468	-101.569	459.982	850.228	-24.8388	371.389	864.255	-51.1482	276.406	834.222	-37.048	699.418	789.614	513.168	430.37	842.726	455.124	466.578	844.713	381.216	383.84	876.475	398.04	299.564	822.319	365.909
29	0.28	569.213	1310.06	208.896	607.393	1299.92	142.335	603.752	1294.86	278.226	687.474	1126.2	65.7129	720.795	1117.55	345.658	607.271	1072.88	210.263	719.138	790.396	-93.3404	449.865	839.504	-101.576	459.968	850.236	-24.8342	371.396	864.264	-51.156	276.386	834.235	-37.0169	699.449	789.555	513.131	430.385	842.719	455.146	466.622	844.708	381.227	383.864	876.478	398.062	299.6	822.346	365.949
30	0.29	569.156	1310.05	208.85	607.363	1299.89	142.287	603.681	1294.86	278.202	687.411	1126.22	65.7498	720.796	1117.52	345.692	607.211	1072.91	210.326	719.15	790.446	-93.3305	449.885	839.524	-101.576	459.969	850.238	-24.8244	371.386	864.303	-51.1472	276.4	834.246	-37.0225	699.463	789.483	513.092	430.39	842.701	455.137	466.673	844.713	381.257	383.881	876.488	398.067	299.601	822.348	365.97
31	0.3	568.992	1310.02	208.808	607.291	1299.83	142.253	603.529	1294.86	278.184	687.369	1126.24	65.7899	720.773	1117.5	345.731	607.131	1072.92	210.379	719.131	790.485	-93.3385	449.878	839.56	-101.575	459.987	850.243	-24.8312	371.356	864.308	-51.1412	276.353	834.269	-36.982	699.486	789.416	513.076	430.373	842.7	455.138	466.683	844.718	381.276	383.842	876.511	398.084	299.563	822.356	365.965
32	0.31	568.789	1310.01	208.807	607.177	1299.78	142.233	603.385	1294.84	278.175	687.337	1126.26	65.8182	720.74	1117.46	345.767	607.137	1072.89	210.413	719.117	790.499	-93.3438	449.903	839.555	-101.572	459.981	850.249	-24.8382	371.359	864.299	-51.1637	276.312	834.274	-36.979	699.478	789.325	513.025	430.369	842.704	455.152	466.682	844.7	381.278	383.8	876.521	398.116	299.512	822.38	365.969
33	0.32	568.591	1310	208.781	607.064	1299.71	142.218	603.292	1294.82	278.159	687.288	1126.25	65.8292	720.758	1117.41	345.798	607.203	1072.8	210.419	719.105	790.508	-93.347	449.908	839.541	-101.548	459.974	850.246	-24.8333	371.372	864.3	-51.1662	276.344	834.263	-36.9865	699.524	789.234	512.953	430.386	842.701	455.158	466.675	844.696	381.269	383.821	876.526	398.124	299.583	822.358	365.977
34	0.33	568.466	1309.96	208.777	606.943	1299.62	142.214	603.206	1294.75	278.137	687.235	1126.23	65.8528	720.731	1117.35	345.812	607.25	1072.7	210.437	719.101	790.502	-93.3474	449.886	839.538	-101.543	459.959	850.245	-24.829	371.367	864.29	-51.1697	276.349	834.263	-36.9869	699.569	789.15	512.893	430.41	842.695	455.182	466.68	844.684	381.273	383.855	876.52	398.125	299.649	822.374	365.996
35	0.34	568.285	1309.95	208.763	606.838	1299.51	142.193	603.077	1294.64	278.137	687.2	1126.2	65.8636	720.714	1117.32	345.852	607.289	1072.58	210.447	719.099	790.472	-93.3267	449.878	839.518	-101.559	459.94	850.243	-24.817	371.357	864.286	-51.1802	276.37	834.257	-37.0089	699.586	789.033	512.814	430.433	842.677	455.204	466.717	844.662	381.297	383.855	876.512	398.144	299.63	822.398	366.029
36	0.35	568.18	1309.86	208.742	606.671	1299.38	142.163	602.889	1294.57	278.144	687.136	1126.17	65.8673	720.681	1117.28	345.846	607.224	1072.49	210.465	719.134	790.449	-93.3061	449.882	839.519	-101.559	459.964	850.241	-24.8305	371.361	864.282	-51.1783	276.328	834.263	-36.9989	699.596	788.906	512.72	430.459	842.666	455.203	466.756	844.646	381.306	383.862	876.516	398.153	299.595	822.398	366.053
37	0.36	568.167	1309.73	208.689	606.495	1299.33	142.136	602.668	1294.51	278.154	687.076	1126.12	65.8702	720.618	1117.26	345.844	607.191	1072.41	210.482	719.163	790.42	-93.3039	449.894	839.514	-101.571	459.961	850.224	-24.8331	371.377	864.281	-51.1746	276.356	834.239	-37.0393	699.694	788.812	512.603	430.464	842.67	455.19	466.738	844.651	381.278	383.851	876.534	398.168	299.652	822.392	366.062
38	0.37	568.052	1309.59	208.645	606.322	1299.27	142.128	602.482	1294.43	278.171	686.989	1126.08	65.862	720.57	1117.25	345.852	607.123	1072.32	210.474	719.202	790.385	-93.2785	449.956	839.519	-101.576	459.981	850.201	-24.8277	371.382	864.274	-51.1557	276.439	834.201	-37.0912	699.779	788.733	512.511	430.454	842.679	455.184	466.739	844.664	381.274	383.834	876.545	398.188	299.644	822.385	366.057
39	0.38	567.829	1309.48	208.672	606.127	1299.19	142.106	602.276	1294.37	278.171	686.882	1126.02	65.859	720.47	1117.21	345.852	607.039	1072.22	210.48	719.22	790.338	-93.2598	449.942	839.496	-101.549	459.993	850.177	-24.8407	371.346	864.284	-51.1519	276.411	834.172	-37.0469	699.768	788.639	512.431	430.452	842.655	455.205	466.742	844.655	381.296	383.824	876.546	398.217	299.592	822.378	366.066
40	0.39	567.674	1309.44	208.7	605.986	1299.13	142.074	602.078	1294.32	278.166	686.807	1125.96	65.8548	720.337	1117.15	345.862	607.039	1072.05	210.49	719.225	790.28	-93.265	449.917	839.492	-101.541	459.993	850.15	-24.8207	371.354	864.27	-51.1632	276.37	834.188	-36.9991	699.77	788.554	512.34	430.469	842.641	455.212	466.713	844.644	381.292	383.84	876.531	398.23	299.581	822.369	366.131
41	0.4	567.592	1309.35	208.698	605.896	1299.06	142.018	601.876	1294.25	278.127	686.712	1125.87	65.8267	720.242	1117.11	345.834	607.067	1071.85	210.463	719.218	790.211	-93.2818	449.891	839.442	-101.548	460.011	850.123	-24.8226	371.422	864.228	-51.1834	276.394	834.197	-37.0222	699.806	788.504	512.25	430.485	842.641	455.206	466.674	844.61	381.263	383.86	876.496	398.215	299.628	822.328	366.142
42	0.41	567.508	1309.28	208.631	605.794	1299.03	141.957	601.643	1294.21	278.075	686.576	1125.8	65.7867	720.172	1117.09	345.789	607.076	1071.67	210.403	719.216	790.134	-93.2886	449.939	839.4	-101.607	460.014	850.122	-24.8326	371.424	864.204	-51.1838	276.408	834.22	-37.0426	699.83	788.48	512.193	430.504	842.64	455.201	466.629	844.58	381.215	383.859	876.46	398.199	299.613	822.353	366.124
43	0.42	567.39	1309.25	208.555	605.674	1299	141.912	601.491	1294.19	278.047	686.472	1125.77	65.7644	720.043	1117.09	345.782	607.034	1071.52	210.361	719.118	790.098	-93.1549	449.945	839.398	-101.618	459.996	850.145	-24.8426	371.382	864.226	-51.1898	276.375	834.254	-37.0304	699.846	788.455	512.139	430.489	842.643	455.19	466.624	844.545	381.197	383.858	876.457	398.2	299.564	822.38	366.119
44	0.43	567.181	1309.27	208.536	605.541	1299.01	141.864	601.341	1294.19	278.034	686.389	1125.76	65.7507	719.793	1117.1	345.82	606.903	1071.47	210.368	719.041	790.11	-92.975	449.939	839.424	-101.596	459.975	850.164	-24.8359	371.359	864.259	-51.1794	276.321	834.257	-37.0036	699.87	788.458	512.087	430.517	842.652	455.196	466.674	844.542	381.222	383.859	876.493	398.213	299.643	822.361	366.117
45	0.44	566.901	1309.27	208.548	605.389	1299.01	141.836	601.229	1294.21	278.026	686.27	1125.75	65.7405	719.501	1117.11	345.867	606.8	1071.44	210.378	719.207	790.081	-93.1746	449.911	839.482	-101.58	459.961	850.179	-24.834	371.368	864.317	-51.1703	276.329	834.255	-36.9756	699.88	788.459	512.053	430.554	842.669	455.202	466.722	844.571	381.261	383.878	876.533	398.224	299.581	822.452	366.154
46	0.45	566.781	1309.19	208.493	605.245	1298.99	141.78	601.112	1294.17	277.995	686.174	1125.75	65.7177	719.461	1117.14	345.8	606.723	1071.39	210.356	719.251	790.084	-93.2212	449.908	839.501	-101.583	459.967	850.195	-24.8583	371.354	864.356	-51.161	276.331	834.253	-37.0196	699.876	788.453	512.041	430.541	842.66	455.174	466.736	844.587	381.271	383.856	876.564	398.228	299.563	822.486	366.143
47	0.46	566.794	1309.04	208.389	605.088	1298.93	141.737	600.956	1294.13	277.94	686.108	1125.74	65.6901	719.165	1117.13	345.863	606.681	1071.34	210.322	719.271	790.061	-93.2385	449.859	839.535	-101.578	459.955	850.215	-24.8539	371.321	864.379	-51.1548	276.34	834.262	-37.0532	699.824	788.427	512.032	430.524	842.658	455.163	466.735	844.593	381.269	383.851	876.577	398.235	299.546	822.459	366.096
48	0.47	566.699	1308.91	208.337	604.981	1298.84	141.668	600.809	1294.06	277.89	686.057	1125.7	65.6758	719.04	1117.12	345.876	606.7	1071.22	210.304	719.143	790.022	-93.1644	449.854	839.545	-101.585	459.964	850.207	-24.8462	371.313	864.385	-51.148	276.331	834.252	-37.0157	699.841	788.431	512.046	430.543	842.665	455.175	466.718	844.601	381.265	383.871	876.562	398.233	299.592	822.429	366.098
49	0.48	567.083	1308.56	208.156	604.841	1298.77	141.613	600.676	1293.97	277.844	685.991	1125.66	65.6547	718.988	1117.12	345.855	606.785	1071.07	210.284	719.011	790.023	-93.0384	449.866	839.497	-101.588	459.953	850.177	-24.8447	371.327	864.362	-51.1542	276.307	834.267	-36.9544	699.847	788.457	512.069	430.541	842.667	455.186	466.682	844.582	381.253	383.859	876.546	398.218	299.605	822.414	366.142
50	0.49	568.163	1307.94	207.729	604.738	1298.65	141.558	600.543	1293.88	277.789	685.949	1125.63	65.6126	718.95	1117.11	345.831	606.836	1070.93	210.239	719.165	789.971	-93.2478	449.868	839.464	-101.593	459.954	850.148	-24.8446	371.338	864.324	-51.1685	276.299	834.265	-36.9638	699.832	788.481	512.081	430.492	842.681	455.191	466.633	844.561	381.227	383.837	876.518	398.204	299.535	822.388	366.175
51	0.5	568.312	1307.67	207.583	604.622	1298.54	141.486	600.389	1293.79	277.718	685.938	1125.58	65.5683	719.011	1117.09	345.736	606.83	1070.84	210.2	719.141	789.913	-93.3321	449.856	839.438	-101.626	459.95	850.139	-24.8507	371.328	864.302	-51.172	276.329	834.254	-36.9816	699.806	788.498	512.104	430.461	842.692	455.2	466.595	844.554	381.213	383.813	876.494	398.198	299.501	822.425	366.186
52	0.51	568.278	1307.48	207.466	604.516	1298.44	141.383	600.254	1293.68	277.653	685.946	1125.54	65.5361	719.129	1117.06	345.613	606.84	1070.78	210.165	719.128	789.868	-93.3701	449.871	839.414	-101.666	459.951	850.145	-24.8639	371.363	864.278	-51.1793	276.319	834.255	-36.992	699.798	788.502	512.125	430.472	842.688	455.208	466.586	844.544	381.194	383.821	876.494	398.19	299.618	822.415	366.167
53	0.52	568.118	1307.33	207.32	604.359	1298.34	141.297	600.039	1293.58	277.558	685.991	1125.52	65.4999	719.113	1117.06	345.601	606.891	1070.74	210.092	719.135	789.838	-93.3812	449.882	839.408	-101.677	459.991	850.133	-24.8872	371.386	864.264	-51.2007	276.294	834.26	-36.9996	699.812	788.508	512.136	430.467	842.693	455.195	466.562	844.535	381.156	383.791	876.511	398.188	299.73	822.319	366.121
54	0.53	567.771	1307.19	207.204	604.205	1298.25	141.22	599.823	1293.43	277.472	686.036	1125.51	65.4576	719.234	1117.03	345.509	606.872	1070.75	210.04	719.179	789.819	-93.36	449.894	839.413	-101.668	459.991	850.125	-24.9325	371.375	864.269	-51.2146	276.363	834.242	-37.038	699.822	788.498	512.108	430.478	842.693	455.172	466.576	844.534	381.158	383.778	876.511	398.191	299.653	822.354	366.112
55	0.54	567.521	1307.02	207.075	604.101	1298.15	141.137	599.658	1293.3	277.398	686.096	1125.49	65.4326	719.097	1117.04	345.573	606.847	1070.77	210.017	719.104	789.774	-93.2483	449.88	839.426	-101.635	459.984	850.13	-24.9441	371.361	864.285	-51.2195	276.404	834.215	-37.0331	699.826	788.493	512.064	430.499	842.682	455.17	466.649	844.538	381.203	383.834	876.521	398.187	299.536	822.398	366.146
56	0.55	567.386	1306.91	206.992	603.987	1298.06	141.104	599.523	1293.2	277.346	686.192	1125.47	65.4209	719.113	1117.02	345.555	606.921	1070.78	210.007	718.983	789.716	-93.1199	449.912	839.467	-101.621	460.021	850.14	-24.9259	371.387	864.313	-51.2107	276.413	834.21	-37.0324	699.878	788.496	512.048	430.541	842.669	455.17	466.719	844.537	381.248	383.89	876.525	398.211	299.596	822.376	366.175
57	0.56	567.326	1306.74	206.869	603.843	1297.96	141.017	599.36	1293.11	277.266	686.283	1125.44	65.3947	719.162	1116.99	345.517	607.008	1070.74	209.959	719.196	789.673	-93.3145	449.939	839.468	-101.642	460.045	850.137	-24.9143	371.403	864.32	-51.2005	276.495	834.199	-37.0593	699.924	788.5	512.019	430.577	842.668	455.163	466.743	844.532	381.246	383.93	876.53	398.232	299.634	822.387	366.185
58	0.57	567.131	1306.57	206.76	603.668	1297.86	140.902	599.187	1293.01	277.151	686.331	1125.42	65.3715	719.207	1117	345.461	607.012	1070.69	209.883	719.265	789.633	-93.3736	449.946	839.455	-101.67	460.054	850.147	-24.9414	371.409	864.327	-51.2136	276.502	834.192	-37.0796	699.936	788.493	511.943	430.573	842.666	455.145	466.7	844.532	381.19	383.94	876.524	398.214	299.599	822.401	366.149
59	0.58	567.005	1306.41	206.66	603.506	1297.78	140.8	599.016	1292.96	277.052	686.372	1125.39	65.3482	719.327	1117	345.37	607.017	1070.66	209.829	719.275	789.594	-93.3822	449.926	839.421	-101.677	460.057	850.152	-24.9611	371.429	864.322	-51.2429	276.479	834.206	-37.0649	699.955	788.479	511.878	430.566	842.687	455.129	466.7	844.527	381.164	383.925	876.515	398.193	299.601	822.424	366.125
60	0.59	566.227	1306.5	206.772	603.387	1297.71	140.727	598.831	1292.93	276.991	686.397	1125.37	65.3304	719.565	1117.01	345.247	607.046	1070.6	209.823	719.26	789.573	-93.4013	449.973	839.397	-101.694	460.095	850.151	-24.9694	371.444	864.297	-51.245	276.486	834.222	-37.0528	699.99	788.473	511.835	430.597	842.708	455.146	466.683	844.513	381.163	383.945	876.493	398.196	299.604	822.467	366.157
61	0.6	565.219	1306.73	206.947	603.268	1297.63	140.657	598.642	1292.88	276.884	686.386	1125.35	65.3264	719.608	1117.01	345.226	607.034	1070.54	209.81	719.256	789.569	-93.4103	450.007	839.37	-101.724	460.105	850.14	-24.9713	371.464	864.283	-51.2536	276.48	834.228	-37.0699	700.009	788.47	511.798	430.612	842.714	455.17	466.621	844.491	381.131	383.91	876.489	398.188	299.596	822.467	366.185
62	0.61	566.184	1306.26	206.484	603.135	1297.58	140.564	598.47	1292.84	276.769	686.353	1125.32	65.2952	719.548	1117.01	345.189	606.975	1070.5	209.766	719.249	789.552	-93.4311	449.994	839.37	-101.761	460.078	850.136	-25.0014	371.455	864.279	-51.2759	276.482	834.238	-37.0933	700.011	788.449	511.729	430.584	842.706	455.139	466.569	844.488	381.08	383.856	876.491	398.176	299.671	822.396	366.153
63	0.62	565.762	1306.34	206.492	603.071	1297.54	140.483	598.367	1292.84	276.697	686.312	1125.3	65.2979	719.382	1117.01	345.241	606.987	1070.44	209.747	719.246	789.57	-93.4444	449.976	839.377	-101.76	460.041	850.137	-25.0036	371.451	864.279	-51.2675	276.445	834.242	-37.066	699.984	788.395	511.676	430.559	842.693	455.128	466.542	844.513	381.066	383.874	876.492	398.186	299.604	822.423	366.18
64	0.63	564.962	1306.61	206.707	603.02	1297.52	140.47	598.328	1292.85	276.692	686.252	1125.28	65.3285	719.092	1117	345.392	606.962	1070.39	209.783	719.286	789.594	-93.4171	449.963	839.411	-101.731	460.024	850.14	-24.9531	371.428	864.292	-51.2285	276.446	834.247	-37.0101	699.99	788.362	511.681	430.58	842.687	455.165	466.556	844.534	381.111	383.872	876.518	398.241	299.647	822.398	366.21
65	0.64	565.994	1306.27	206.354	602.967	1297.53	140.443	598.304	1292.88	276.681	686.195	1125.26	65.3414	718.97	1116.99	345.457	606.893	1070.37	209.823	719.299	789.589	-93.4154	449.951	839.426	-101.69	460.055	850.137	-24.926	371.422	864.296	-51.2075	276.434	834.253	-36.9706	699.998	788.34	511.658	430.593	842.671	455.191	466.585	844.538	381.149	383.86	876.536	398.282	299.725	822.357	366.253
66	0.65	565.605	1306.42	206.377	602.966	1297.52	140.369	598.233	1292.91	276.613	686.139	1125.24	65.3159	718.978	1117	345.419	606.83	1070.35	209.82	719.262	789.562	-93.4599	449.916	839.418	-101.705	460.067	850.133	-24.9672	371.43	864.284	-51.2322	276.386	834.263	-36.9618	699.965	788.301	511.603	430.573	842.666	455.178	466.649	844.521	381.166	383.857	876.534	398.263	299.645	822.384	366.272
67	0.66	564.862	1306.71	206.534	602.964	1297.53	140.325	598.232	1292.92	276.556	686.062	1125.22	65.3064	719.03	1117.01	345.354	606.8	1070.31	209.805	719.23	789.532	-93.4807	449.942	839.395	-101.736	460.091	850.135	-25.0095	371.438	864.282	-51.2732	276.392	834.271	-37.0107	699.951	788.278	511.571	430.585	842.66	455.173	466.661	844.493	381.148	383.889	876.509	398.25	299.583	822.424	366.256
68	0.67	566.04	1306.32	206.208	602.95	1297.53	140.317	598.25	1292.94	276.556	686.002	1125.22	65.3156	718.788	1117.01	345.46	606.753	1070.29	209.818	719.21	789.525	-93.4974	449.946	839.383	-101.729	460.097	850.144	-24.9961	371.438	864.295	-51.2595	276.419	834.274	-37.0304	699.976	788.273	511.581	430.615	842.653	455.187	466.661	844.479	381.162	383.887	876.506	398.257	299.581	822.444	366.253
69	0.68	566.324	1306.25	206.12	602.927	1297.54	140.31	598.293	1292.95	276.559	685.924	1125.23	65.3142	718.69	1117.02	345.489	606.693	1070.29	209.823	719.208	789.538	-93.4926	449.871	839.379	-101.7	460.051	850.155	-24.9777	371.425	864.327	-51.2423	276.462	834.245	-37.0526	699.97	788.253	511.583	430.601	842.66	455.193	466.626	844.512	381.164	383.879	876.538	398.262	299.653	822.418	366.229
70	0.69	566.294	1306.26	206.099	602.892	1297.54	140.307	598.268	1292.98	276.549	685.856	1125.24	65.3055	718.586	1116.99	345.487	606.636	1070.29	209.794	719.193	789.554	-93.4965	449.888	839.374	-101.707	460.028	850.143	-24.9998	371.408	864.325	-51.2708	276.445	834.229	-37.0694	699.93	788.236	511.57	430.568	842.669	455.167	466.601	844.535	381.137	383.832	876.55	398.244	299.521	822.471	366.225
71	0.7	566.306	1306.28	206.113	602.882	1297.54	140.327	598.229	1293.01	276.546	685.804	1125.24	65.3131	718.588	1116.97	345.453	606.618	1070.29	209.793	719.183	789.549	-93.514	449.918	839.379	-101.728	460.024	850.138	-25.0148	371.395	864.302	-51.2788	276.425	834.215	-37.0586	699.885	788.237	511.591	430.515	842.678	455.154	466.585	844.546	381.126	383.811	876.539	398.228	299.498	822.463	366.255
72	0.71	566.254	1306.29	206.215	602.94	1297.53	140.367	598.237	1293.01	276.587	685.817	1125.24	65.3137	718.702	1116.99	345.416	606.644	1070.29	209.81	719.166	789.563	-93.5149	449.939	839.396	-101.729	460.022	850.129	-24.9813	371.419	864.286	-51.2572	276.435	834.204	-37.0259	699.875	788.259	511.654	430.507	842.693	455.184	466.561	844.554	381.138	383.796	876.531	398.237	299.553	822.419	366.3
73	0.72	566.322	1306.27	206.27	602.992	1297.52	140.407	598.278	1292.98	276.656	685.845	1125.25	65.3198	718.556	1117	345.525	606.657	1070.29	209.829	719.13	789.576	-93.5145	449.941	839.4	-101.723	460.048	850.101	-24.9555	371.44	864.275	-51.2397	276.42	834.193	-37.0212	699.868	788.282	511.707	430.494	842.689	455.2	466.548	844.569	381.136	383.793	876.53	398.237	299.554	822.393	366.287
74	0.73	566.401	1306.22	206.298	602.972	1297.54	140.432	598.298	1292.98	276.704	685.87	1125.26	65.3186	718.556	1117	345.527	606.649	1070.33	209.829	719.126	789.605	-93.5132	449.921	839.396	-101.728	460.036	850.096	-24.965	371.418	864.284	-51.2473	276.39	834.194	-37.0379	699.837	788.302	511.736	430.456	842.681	455.168	466.502	844.562	381.117	383.755	876.529	398.224	299.497	822.356	366.282
75	0.74	566.477	1306.19	206.315	602.936	1297.57	140.488	598.326	1292.95	276.732	685.929	1125.26	65.3101	718.584	1117.04	345.53	606.654	1070.38	209.813	719.148	789.585	-93.5143	449.943	839.381	-101.738	460.018	850.106	-24.9723	371.401	864.292	-51.2509	276.403	834.186	-37.059	699.813	788.341	511.77	430.466	842.671	455.144	466.452	844.524	381.088	383.735	876.522	398.199	299.56	822.32	366.242
76	0.75	566.489	1306.18	206.37	602.97	1297.6	140.567	598.384	1292.94	276.8	686.005	1125.28	65.312	718.654	1117.08	345.562	606.707	1070.44	209.814	719.16	789.581	-93.4959	449.951	839.354	-101.724	460.045	850.126	-24.9677	371.411	864.308	-51.2478	276.394	834.216	-37.0366	699.851	788.402	511.823	430.485	842.68	455.152	466.491	844.51	381.107	383.784	876.528	398.19	299.556	822.35	366.255
77	0.76	566.415	1306.23	206.481	603.007	1297.63	140.628	598.416	1292.95	276.88	686.069	1125.31	65.3246	718.72	1117.11	345.579	606.702	1070.52	209.842	719.206	789.596	-93.4707	449.92	839.368	-101.697	460.04	850.152	-24.9557	371.402	864.33	-51.2418	276.395	834.232	-37.0219	699.84	788.431	511.855	430.473	842.684	455.166	466.556	844.524	381.145	383.807	876.533	398.201	299.497	822.388	366.276
78	0.77	566.263	1306.3	206.537	602.99	1297.69	140.66	598.399	1292.95	276.926	686.124	1125.33	65.3337	718.798	1117.13	345.552	606.696	1070.57	209.821	719.244	789.622	-93.4489	449.914	839.433	-101.689	459.997	850.178	-24.9656	371.352	864.35	-51.2351	276.402	834.221	-37.0644	699.835	788.455	511.867	430.465	842.678	455.137	466.602	844.542	381.176	383.786	876.55	398.216	299.409	822.413	366.23
79	0.78	566.292	1306.29	206.569	603.012	1297.71	140.706	598.423	1292.92	276.975	686.171	1125.35	65.3455	718.859	1117.12	345.543	606.723	1070.59	209.821	719.27	789.648	-93.4112	449.892	839.46	-101.686	459.991	850.185	-24.96	371.348	864.349	-51.2368	276.396	834.218	-37.0891	699.846	788.473	511.898	430.477	842.672	455.127	466.613	844.552	381.183	383.789	876.561	398.211	299.434	822.415	366.219
80	0.79	566.39	1306.27	206.626	603.064	1297.7	140.758	598.477	1292.9	277.04	686.217	1125.35	65.3665	718.916	1117.12	345.563	606.756	1070.6	209.854	719.295	789.651	-93.3826	449.914	839.473	-101.673	460.028	850.174	-24.9504	371.401	864.336	-51.2328	276.434	834.224	-37.082	699.868	788.479	511.943	430.492	842.674	455.135	466.614	844.565	381.168	383.845	876.558	398.218	299.496	822.397	366.219
81	0.8	566.43	1306.28	206.696	603.126	1297.67	140.82	598.522	1292.88	277.113	686.26	1125.35	65.3744	718.966	1117.1	345.604	606.803	1070.59	209.909	719.313	789.645	-93.3717	449.92	839.483	-101.669	460.06	850.17	-24.9388	371.413	864.334	-51.2191	276.391	834.246	-37.0301	699.899	788.483	511.987	430.512	842.677	455.162	466.645	844.591	381.194	383.852	876.546	398.222	299.569	822.387	366.271
82	0.81	566.456	1306.26	206.76	603.155	1297.66	140.867	598.584	1292.86	277.182	686.264	1125.35	65.3869	718.967	1117.08	345.644	606.811	1070.58	209.946	719.286	789.634	-93.3872	449.912	839.473	-101.665	460.056	850.166	-24.9388	371.372	864.33	-51.2089	276.36	834.262	-36.9977	699.866	788.474	511.992	430.504	842.683	455.186	466.644	844.605	381.229	383.819	876.534	398.216	299.505	822.445	366.328
83	0.82	566.424	1306.23	206.809	603.137	1297.63	140.892	598.587	1292.85	277.223	686.282	1125.33	65.3976	718.991	1117.08	345.67	606.825	1070.57	209.96	719.258	789.639	-93.3958	449.922	839.413	-101.675	460.049	850.157	-24.9335	371.366	864.334	-51.2074	276.395	834.262	-36.9792	699.857	788.451	511.976	430.502	842.68	455.188	466.62	844.588	381.226	383.817	876.522	398.207	299.391	822.493	366.315
84	0.83	566.496	1306.12	206.822	603.191	1297.61	140.931	598.575	1292.84	277.274	686.322	1125.33	65.4107	719.037	1117.05	345.679	606.923	1070.54	209.949	719.249	789.632	-93.4	449.957	839.393	-101.685	460.088	850.137	-24.9487	371.419	864.313	-51.2181	276.418	834.263	-36.9877	699.881	788.424	511.979	430.506	842.678	455.175	466.612	844.567	381.186	383.821	876.519	398.194	299.488	822.457	366.29
85	0.84	566.036	1306.28	207.022	603.245	1297.59	140.963	598.606	1292.82	277.3	686.347	1125.34	65.4304	719.059	1117	345.699	607.01	1070.5	209.964	719.237	789.629	-93.412	449.904	839.41	-101.69	460.081	850.115	-24.9438	371.447	864.276	-51.2294	276.488	834.226	-37.0363	699.891	788.376	511.961	430.534	842.68	455.175	466.585	844.557	381.149	383.816	876.509	398.195	299.647	822.354	366.241
86	0.85	565.258	1306.58	207.292	603.263	1297.59	140.986	598.615	1292.8	277.324	686.372	1125.36	65.4625	719.096	1116.98	345.711	607.031	1070.51	210.004	719.119	789.681	-93.3135	449.884	839.42	-101.703	460.044	850.102	-24.9325	371.445	864.283	-51.2283	276.422	834.231	-37.0233	699.869	788.32	511.93	430.56	842.681	455.169	466.556	844.56	381.132	383.823	876.502	398.207	299.706	822.293	366.22
87	0.86	566.232	1306.24	207.019	603.281	1297.58	141.032	598.641	1292.78	277.361	686.424	1125.38	65.5011	719.134	1116.95	345.744	607.06	1070.52	210.052	719.031	789.734	-93.144	449.913	839.432	-101.673	460.041	850.103	-24.9165	371.436	864.284	-51.203	276.359	834.217	-36.989	699.857	788.252	511.906	430.54	842.658	455.167	466.647	844.545	381.184	383.844	876.506	398.218	299.6	822.349	366.277
88	0.87	566.498	1306.14	206.984	603.276	1297.58	141.12	598.622	1292.78	277.403	686.472	1125.39	65.5581	719.204	1116.92	345.812	607.075	1070.53	210.105	719.253	789.749	-93.3047	449.957	839.451	-101.677	460.071	850.112	-24.8851	371.453	864.273	-51.1835	276.39	834.192	-36.9935	699.86	788.208	511.892	430.528	842.632	455.195	466.734	844.536	381.249	383.874	876.525	398.253	299.534	822.36	366.347
89	0.88	566.577	1306.1	207	603.317	1297.6	141.149	598.69	1292.75	277.441	686.487	1125.4	65.592	719.221	1116.9	345.85	607.079	1070.55	210.144	719.188	789.795	-93.2553	449.936	839.468	-101.664	460.067	850.131	-24.888	371.431	864.284	-51.1674	276.404	834.213	-36.9919	699.879	788.168	511.861	430.56	842.629	455.209	466.744	844.53	381.256	383.876	876.554	398.281	299.61	822.353	366.316
90	0.89	565.977	1306.38	207.165	603.396	1297.62	141.141	598.679	1292.77	277.443	686.476	1125.43	65.6014	719.235	1116.9	345.862	607.087	1070.56	210.148	719.032	789.831	-93.1409	449.899	839.469	-101.656	460.067	850.149	-24.9183	371.394	864.292	-51.1891	276.413	834.235	-37.0221	699.877	788.151	511.827	430.567	842.633	455.193	466.708	844.523	381.232	383.856	876.553	398.277	299.697	822.345	366.286
91	0.9	565.178	1306.71	207.366	603.414	1297.68	141.155	598.616	1292.84	277.441	686.465	1125.44	65.6038	719.24	1116.92	345.872	607.049	1070.61	210.137	719.17	789.853	-93.3602	449.926	839.454	-101.659	460.064	850.17	-24.9371	371.391	864.319	-51.2152	276.39	834.261	-37.0017	699.87	788.134	511.771	430.555	842.655	455.182	466.692	844.541	381.213	383.841	876.559	398.258	299.606	822.424	366.287
92	0.91	566.162	1306.44	207.079	603.434	1297.73	141.186	598.612	1292.9	277.471	686.461	1125.48	65.6337	719.191	1116.94	345.918	606.973	1070.65	210.148	719.143	789.889	-93.2978	449.913	839.433	-101.635	460.036	850.198	-24.9333	371.409	864.341	-51.2137	276.407	834.272	-37.0089	699.864	788.123	511.727	430.526	842.671	455.199	466.704	844.552	381.242	383.836	876.575	398.262	299.382	822.571	366.341
93	0.92	566.421	1306.43	207.035	603.509	1297.77	141.231	598.631	1292.96	277.521	686.408	1125.5	65.6582	719.136	1116.96	345.964	606.958	1070.63	210.192	719.035	789.925	-93.1647	449.926	839.426	-101.612	460.017	850.207	-24.9155	371.408	864.33	-51.2086	276.37	834.297	-36.9691	699.882	788.114	511.722	430.565	842.679	455.228	466.664	844.559	381.261	383.827	876.574	398.274	299.294	822.6	366.374
94	0.93	566.66	1306.41	207.026	603.551	1297.81	141.251	598.638	1292.99	277.542	686.331	1125.48	65.6551	719.054	1116.94	345.978	606.978	1070.55	210.204	719.178	789.902	-93.3618	449.945	839.426	-101.651	460.029	850.198	-24.9296	371.427	864.31	-51.2278	276.443	834.266	-37.0291	699.895	788.088	511.735	430.573	842.672	455.225	466.612	844.551	381.21	383.853	876.561	398.279	299.503	822.525	366.346
95	0.94	566.839	1306.43	207.006	603.623	1297.84	141.255	598.651	1293.01	277.536	686.24	1125.46	65.6578	718.99	1116.9	345.969	606.951	1070.46	210.18	719.184	789.903	-93.412	449.944	839.389	-101.685	460.065	850.168	-24.955	371.416	864.291	-51.2407	276.464	834.249	-37.0789	699.828	788.034	511.727	430.521	842.659	455.203	466.561	844.531	381.147	383.819	876.545	398.248	299.534	822.463	366.3
96	0.95	566.904	1306.46	207.056	603.68	1297.85	141.303	598.701	1293.04	277.591	686.148	1125.44	65.6712	718.924	1116.88	346.003	607.004	1070.38	210.203	719.19	789.889	-93.4189	449.94	839.403	-101.684	460.056	850.122	-24.9239	371.404	864.268	-51.2239	276.409	834.245	-37.0168	699.778	787.98	511.737	430.472	842.634	455.204	466.552	844.538	381.152	383.803	876.529	398.254	299.487	822.395	366.295
97	0.96	567.012	1306.53	207.17	603.733	1297.87	141.388	598.852	1293.05	277.672	686.103	1125.4	65.6926	718.847	1116.85	346.07	607.037	1070.31	210.276	719.189	789.855	-93.4198	449.918	839.437	-101.672	460.074	850.104	-24.8671	371.411	864.254	-51.1592	276.364	834.229	-36.9083	699.775	787.964	511.785	430.486	842.634	455.241	466.61	844.533	381.196	383.835	876.523	398.288	299.547	822.348	366.336
98	0.97	567.013	1306.65	207.247	603.766	1297.9	141.436	598.889	1293.07	277.714	686.077	1125.39	65.709	718.771	1116.83	346.102	607.008	1070.29	210.298	719.12	789.86	-93.2931	449.93	839.437	-101.656	460.049	850.118	-24.8464	371.452	864.261	-51.1412	276.336	834.238	-36.8982	699.759	787.953	511.815	430.507	842.635	455.264	466.608	844.54	381.218	383.845	876.528	398.303	299.626	822.333	366.363
99	0.98	566.888	1306.75	207.262	603.76	1297.95	141.438	598.866	1293.1	277.734	686.037	1125.38	65.6909	718.729	1116.82	346.068	606.881	1070.32	210.263	719.049	789.872	-93.1344	449.926	839.447	-101.646	460.008	850.135	-24.8717	371.424	864.282	-51.1685	276.383	834.229	-36.9545	699.732	787.922	511.782	430.473	842.617	455.242	466.625	844.538	381.225	383.827	876.549	398.295	299.497	822.39	366.349
100	0.99	566.815	1306.89	207.287	603.77	1298.01	141.434	598.872	1293.15	277.756	686.026	1125.4	65.6815	718.72	1116.83	346.042	606.82	1070.35	210.237	719.214	789.842	-93.3245	449.932	839.466	-101.626	460.023	850.139	-24.8837	371.383	864.323	-51.1738	276.399	834.218	-36.981	699.724	787.925	511.765	430.471	842.614	455.214	466.655	844.552	381.241	383.82	876.569	398.283	299.394	822.468	366.338
101	1	566.854	1306.94	207.355	603.765	1298.08	141.479	598.883	1293.21	277.825	686.048	1125.45	65.6973	718.702	1116.84	346.033	606.87	1070.37	210.247	719.264	789.851	-93.3582	449.918	839.499	-101.61	460.062	850.159	-24.8873	371.387	864.363	-51.1516	276.409	834.215	-37.0116	699.766	787.961	511.781	430.514	842.628	455.224	466.668	844.582	381.255	383.826	876.599	398.291	299.565	822.423	366.328
102	1.01	566.839	1306.97	207.409	603.723	1298.12	141.524	598.824	1293.26	277.858	686.032	1125.47	65.6774	718.666	1116.86	346.004	606.878	1070.4	210.232	719.271	789.857	-93.3567	449.946	839.506	-101.612	460.061	850.177	-24.8865	371.393	864.373	-51.1613	276.441	834.215	-37.0246	699.769	787.971	511.786	430.479	842.633	455.221	466.622	844.59	381.244	383.814	876.614	398.295	299.58	822.438	366.315
103	1.02	566.839	1306.99	207.414	603.678	1298.14	141.53	598.76	1293.27	277.833	685.993	1125.46	65.6463	718.653	1116.85	345.976	606.794	1070.42	210.2	719.271	789.864	-93.37	449.933	839.488	-101.608	460.015	850.17	-24.9064	371.365	864.367	-51.1779	276.455	834.204	-37.0554	699.738	787.975	511.775	430.42	842.628	455.2	466.572	844.578	381.214	383.778	876.594	398.268	299.385	822.483	366.284
104	1.03	566.833	1306.97	207.441	603.709	1298.12	141.489	598.781	1293.24	277.848	685.975	1125.44	65.6221	718.662	1116.84	345.966	606.804	1070.38	210.171	719.224	789.865	-93.3954	449.905	839.444	-101.638	460.012	850.156	-24.9122	371.38	864.327	-51.1908	276.443	834.212	-37.045	699.705	787.987	511.766	430.415	842.627	455.201	466.546	844.564	381.195	383.776	876.575	398.247	299.433	822.444	366.294
105	1.04	566.924	1306.91	207.491	603.72	1298.09	141.513	598.78	1293.22	277.9	686.002	1125.44	65.6169	718.708	1116.84	345.988	606.919	1070.32	210.2	719.192	789.837	-93.4063	449.908	839.397	-101.633	460.039	850.132	-24.876	371.443	864.284	-51.1868	276.39	834.237	-36.9832	699.726	787.998	511.785	430.455	842.655	455.228	466.473	844.578	381.171	383.795	876.562	398.256	299.501	822.415	366.356
106	1.05	566.895	1306.85	207.484	603.678	1298.07	141.528	598.725	1293.22	277.896	686.016	1125.43	65.6182	718.765	1116.84	345.991	606.933	1070.28	210.199	719.201	789.829	-93.4	449.936	839.374	-101.635	460.019	850.117	-24.8544	371.44	864.271	-51.1876	276.448	834.224	-36.9668	699.729	787.999	511.794	430.448	842.664	455.23	466.418	844.569	381.142	383.738	876.55	398.257	299.528	822.377	366.354
107	1.06	566.808	1306.79	207.438	603.622	1298.03	141.503	598.688	1293.18	277.864	686.005	1125.41	65.5965	718.749	1116.85	345.961	606.873	1070.28	210.153	719.197	789.795	-93.4247	449.968	839.37	-101.65	460.021	850.119	-24.883	371.393	864.261	-51.2013	276.447	834.233	-36.9748	699.7	787.992	511.754	430.424	842.656	455.203	466.383	844.563	381.13	383.683	876.54	398.239	299.442	822.414	366.323
108	1.07	566.759	1306.75	207.416	603.612	1298.01	141.477	598.733	1293.14	277.822	686.043	1125.39	65.5876	718.784	1116.85	345.937	606.911	1070.27	210.143	719.177	789.769	-93.4488	449.966	839.381	-101.663	460.071	850.118	-24.9099	371.433	864.256	-51.2228	276.439	834.244	-36.9694	699.722	787.997	511.734	430.436	842.657	455.212	466.434	844.553	381.137	383.712	876.527	398.231	299.487	822.43	366.328
109	1.08	566.778	1306.72	207.407	603.583	1297.99	141.486	598.739	1293.12	277.831	686.112	1125.39	65.5976	718.839	1116.85	345.944	606.998	1070.24	210.171	719.209	789.762	-93.4265	449.969	839.419	-101.664	460.101	850.123	-24.8965	371.465	864.279	-51.205	276.45	834.242	-36.9997	699.797	788	511.735	430.493	842.664	455.238	466.546	844.545	381.173	383.799	876.548	398.258	299.56	822.438	366.346
110	1.09	566.742	1306.72	207.364	603.518	1298	141.492	598.669	1293.08	277.844	686.15	1125.39	65.6074	718.879	1116.82	345.938	606.96	1070.25	210.177	719.29	789.793	-93.384	449.969	839.469	-101.634	460.066	850.153	-24.8755	371.432	864.311	-51.1677	276.454	834.243	-37.0004	699.845	787.975	511.715	430.535	842.651	455.231	466.622	844.556	381.212	383.846	876.572	398.298	299.604	822.416	366.356
111	1.1	566.612	1306.75	207.308	603.434	1297.99	141.456	598.571	1293.04	277.8	686.158	1125.38	65.5949	718.879	1116.79	345.888	606.931	1070.25	210.137	719.34	789.814	-93.368	449.977	839.509	-101.624	460.028	850.182	-24.8925	371.408	864.328	-51.182	276.44	834.246	-37.0145	699.836	787.953	511.644	430.544	842.627	455.214	466.698	844.564	381.251	383.818	876.588	398.31	299.499	822.382	366.351
112	1.11	566.583	1306.68	207.278	603.38	1297.96	141.42	598.567	1293	277.771	686.21	1125.35	65.5703	718.914	1116.75	345.851	606.936	1070.23	210.121	719.34	789.755	-93.394	449.927	839.523	-101.622	460.036	850.165	-24.8922	371.442	864.326	-51.2045	276.464	834.241	-37.0307	699.825	787.912	511.592	430.547	842.609	455.209	466.745	844.53	381.252	383.834	876.592	398.31	299.459	822.391	366.363
113	1.12	566.519	1306.59	207.28	603.354	1297.93	141.388	598.583	1292.98	277.748	686.235	1125.32	65.566	718.953	1116.75	345.844	606.999	1070.16	210.135	719.325	789.701	-93.4124	449.939	839.483	-101.626	460.084	850.137	-24.8904	371.477	864.31	-51.1873	276.428	834.243	-37.0135	699.886	787.893	511.547	430.607	842.619	455.227	466.757	844.499	381.244	383.903	876.561	398.308	299.522	822.386	366.378
114	1.13	565.817	1306.73	207.393	603.322	1297.86	141.333	598.51	1292.96	277.662	686.207	1125.29	65.5421	718.975	1116.77	345.825	607.003	1070.11	210.125	719.318	789.674	-93.4326	449.976	839.409	-101.646	460.112	850.128	-24.8999	371.502	864.277	-51.1865	276.45	834.247	-37.0144	699.923	787.894	511.507	430.6	842.629	455.237	466.673	844.481	381.193	383.892	876.526	398.31	299.608	822.377	366.392
115	1.14	565.086	1306.92	207.487	603.232	1297.83	141.227	598.402	1292.95	277.563	686.134	1125.27	65.5103	718.982	1116.79	345.791	606.955	1070.1	210.079	719.259	789.63	-93.4601	450.016	839.349	-101.677	460.131	850.118	-24.9472	371.511	864.25	-51.2369	276.469	834.235	-37.027	699.909	787.897	511.439	430.574	842.64	455.209	466.615	844.475	381.155	383.857	876.505	398.286	299.419	822.502	366.374
116	1.15	566.202	1306.51	207.085	603.166	1297.82	141.137	598.357	1292.98	277.486	686.097	1125.27	65.483	718.918	1116.82	345.76	606.935	1070.09	210.05	719.24	789.601	-93.4701	450.006	839.34	-101.692	460.134	850.114	-24.9627	371.511	864.247	-51.2667	276.435	834.255	-37.023	699.906	787.903	511.396	430.588	842.655	455.205	466.59	844.465	381.133	383.833	876.522	398.265	299.296	822.602	366.406
117	1.16	566.427	1306.38	206.974	603.087	1297.81	141.108	598.329	1292.99	277.436	686.069	1125.28	65.4831	718.9	1116.82	345.75	606.966	1070.07	210.046	719.242	789.599	-93.4785	449.977	839.369	-101.699	460.147	850.11	-24.9417	371.528	864.251	-51.2466	276.478	834.267	-37.0297	699.94	787.913	511.404	430.629	842.669	455.222	466.573	844.494	381.13	383.832	876.543	398.271	299.419	822.615	366.44
118	1.17	566.362	1306.4	206.93	603.099	1297.8	141.066	598.246	1293.01	277.381	686.05	1125.29	65.4854	718.905	1116.8	345.725	606.969	1070.06	210.037	719.256	789.605	-93.4704	449.995	839.388	-101.683	460.154	850.105	-24.9363	371.528	864.274	-51.2203	276.545	834.251	-37.0684	699.963	787.925	511.389	430.611	842.676	455.207	466.549	844.526	381.109	383.847	876.555	398.286	299.546	822.527	366.403
119	1.18	566.248	1306.52	206.909	603.04	1297.8	141.006	598.089	1293.04	277.328	686.012	1125.29	65.4679	718.89	1116.79	345.685	606.911	1070.05	210.023	719.285	789.629	-93.4494	449.97	839.399	-101.662	460.119	850.106	-24.9586	371.495	864.295	-51.2239	276.547	834.244	-37.1143	699.906	787.89	511.365	430.56	842.657	455.178	466.532	844.552	381.099	383.845	876.566	398.285	299.597	822.436	366.331
120	1.19	566.203	1306.59	206.899	602.956	1297.78	140.979	598.078	1293.06	277.324	685.991	1125.28	65.4701	718.865	1116.77	345.69	606.899	1070.04	210.048	719.306	789.638	-93.4381	449.95	839.434	-101.63	460.105	850.09	-24.9419	371.466	864.314	-51.2028	276.507	834.211	-37.0792	699.871	787.851	511.375	430.562	842.64	455.199	466.592	844.554	381.147	383.874	876.578	398.299	299.593	822.362	366.353
121	1.2	566.236	1306.54	206.901	602.959	1297.79	140.96	598.136	1293.06	277.337	685.993	1125.27	65.4842	718.847	1116.74	345.705	606.92	1070.01	210.081	719.337	789.614	-93.4272	449.954	839.434	-101.607	460.126	850.081	-24.8901	371.508	864.312	-51.1697	276.505	834.198	-37.0445	699.919	787.874	511.399	430.596	842.623	455.219	466.68	844.558	381.213	383.896	876.582	398.322	299.595	822.348	366.398
122	1.21	566.214	1306.48	206.883	602.937	1297.77	140.944	598.143	1293.04	277.308	685.984	1125.25	65.4782	718.816	1116.74	345.695	606.91	1069.98	210.069	719.338	789.583	-93.4234	449.988	839.438	-101.616	460.16	850.08	-24.8789	371.527	864.291	-51.1624	276.496	834.206	-37.0176	699.97	787.902	511.413	430.617	842.617	455.217	466.702	844.55	381.229	383.898	876.578	398.33	299.502	822.419	366.452
123	1.22	565.474	1306.67	207.024	602.84	1297.75	140.906	598.095	1292.99	277.225	685.947	1125.21	65.4511	718.753	1116.74	345.656	606.873	1069.95	210.019	719.285	789.545	-93.4623	449.984	839.421	-101.644	460.123	850.084	-24.898	371.487	864.284	-51.197	276.529	834.205	-37.0513	699.95	787.903	511.417	430.597	842.609	455.195	466.672	844.512	381.196	383.879	876.551	398.303	299.474	822.444	366.397
124	1.23	564.723	1306.91	207.2	602.817	1297.74	140.835	598.047	1292.97	277.165	685.887	1125.19	65.4241	718.698	1116.76	345.639	606.872	1069.92	209.992	719.244	789.528	-93.4824	449.979	839.381	-101.688	460.11	850.082	-24.9329	371.459	864.28	-51.222	276.528	834.213	-37.0579	699.903	787.916	511.41	430.564	842.614	455.188	466.628	844.461	381.144	383.858	876.505	398.276	299.568	822.405	366.321
125	1.24	565.184	1306.73	207.058	602.811	1297.74	140.808	598.009	1292.99	277.166	685.872	1125.19	65.4207	718.7	1116.79	345.652	606.887	1069.92	209.991	719.265	789.515	-93.487	449.983	839.349	-101.689	460.143	850.084	-24.9212	371.484	864.275	-51.2133	276.524	834.234	-36.9966	699.926	787.953	511.447	430.581	842.632	455.204	466.624	844.441	381.153	383.87	876.497	398.272	299.569	822.47	366.361
126	1.25	564.449	1306.99	207.245	602.773	1297.72	140.813	597.918	1293.02	277.164	685.875	1125.2	65.4162	718.701	1116.82	345.65	606.871	1069.93	209.995	719.263	789.507	-93.4752	449.991	839.336	-101.677	460.142	850.081	-24.914	371.499	864.268	-51.2092	276.5	834.243	-37.0154	699.94	787.998	511.468	430.586	842.657	455.211	466.624	844.46	381.177	383.838	876.517	398.264	299.544	822.483	366.416
127	1.26	565.601	1306.56	206.819	602.668	1297.74	140.79	597.78	1293.06	277.115	685.84	1125.21	65.3997	718.643	1116.84	345.646	606.809	1069.93	209.957	719.258	789.524	-93.4604	449.996	839.35	-101.705	460.12	850.1	-24.9373	371.467	864.289	-51.2447	276.506	834.237	-37.0703	699.897	788.007	511.465	430.521	842.675	455.184	466.559	844.501	381.131	383.808	876.547	398.262	299.552	822.47	366.38
128	1.27	565.194	1306.66	206.882	602.598	1297.74	140.746	597.643	1293.07	277.089	685.788	1125.23	65.3956	718.557	1116.83	345.625	606.795	1069.91	209.915	719.285	789.564	-93.4464	449.971	839.37	-101.735	460.122	850.128	-24.9817	371.441	864.291	-51.2489	276.513	834.248	-37.0555	699.892	788.032	511.469	430.49	842.681	455.158	466.499	844.535	381.082	383.793	876.569	398.262	299.593	822.461	366.333
129	1.28	564.354	1306.92	207.119	602.584	1297.73	140.749	597.563	1293.08	277.132	685.799	1125.24	65.4065	718.538	1116.83	345.625	606.79	1069.88	209.931	719.293	789.609	-93.4207	449.949	839.41	-101.718	460.12	850.145	-24.9564	371.435	864.289	-51.219	276.482	834.254	-37.043	699.907	788.045	511.497	430.522	842.676	455.167	466.509	844.561	381.102	383.812	876.584	398.282	299.666	822.406	366.329
130	1.29	565.382	1306.57	206.834	602.524	1297.7	140.801	597.49	1293.09	277.196	685.824	1125.27	65.43	718.564	1116.84	345.64	606.788	1069.87	209.99	719.223	789.629	-93.2889	449.945	839.451	-101.666	460.101	850.146	-24.8971	371.443	864.315	-51.1895	276.424	834.264	-37.0047	699.9	788.037	511.511	430.522	842.679	455.185	466.577	844.573	381.175	383.821	876.609	398.313	299.643	822.406	366.398
131	1.3	564.939	1306.69	206.946	602.394	1297.67	140.823	597.437	1293.05	277.184	685.791	1125.26	65.4458	718.516	1116.83	345.636	606.778	1069.85	209.996	719.079	789.604	-93.1572	449.973	839.43	-101.662	460.078	850.133	-24.8821	371.439	864.306	-51.1845	276.409	834.258	-37.006	699.875	788.02	511.508	430.518	842.651	455.202	466.593	844.55	381.195	383.823	876.592	398.317	299.59	822.414	366.423
132	1.31	564.18	1306.87	207.152	602.276	1297.66	140.829	597.41	1293.01	277.157	685.767	1125.22	65.4322	718.494	1116.82	345.628	606.795	1069.83	209.98	719.23	789.56	-93.3615	449.991	839.379	-101.675	460.084	850.114	-24.9145	371.445	864.283	-51.2196	276.461	834.247	-37.0567	699.871	788.02	511.51	430.531	842.623	455.203	466.614	844.505	381.189	383.833	876.548	398.299	299.536	822.446	366.416
133	1.32	564.685	1306.65	206.984	602.235	1297.61	140.847	597.388	1292.97	277.172	685.776	1125.2	65.423	718.537	1116.82	345.622	606.795	1069.81	209.975	719.294	789.555	-93.4104	450.007	839.329	-101.674	460.116	850.098	-24.9218	371.492	864.245	-51.2417	276.505	834.214	-37.0651	699.886	788.02	511.507	430.559	842.623	455.206	466.641	844.45	381.169	383.868	876.516	398.282	299.588	822.41	366.39
134	1.33	563.465	1307.07	207.336	602.196	1297.57	140.845	597.316	1292.94	277.194	685.763	1125.18	65.4277	718.566	1116.8	345.624	606.828	1069.79	209.99	719.299	789.551	-93.4382	450.014	839.32	-101.672	460.125	850.1	-24.9244	371.529	864.253	-51.2407	276.482	834.209	-37.031	699.936	788	511.509	430.58	842.629	455.212	466.623	844.446	381.148	383.858	876.52	398.279	299.689	822.364	366.358
135	1.34	563.075	1307.14	207.428	602.104	1297.56	140.855	597.157	1292.93	277.207	685.751	1125.2	65.4258	718.534	1116.78	345.609	606.805	1069.79	209.992	719.297	789.563	-93.4423	450.021	839.342	-101.673	460.094	850.102	-24.9299	371.485	864.264	-51.2525	276.523	834.204	-37.0819	699.906	787.973	511.476	430.574	842.635	455.2	466.622	844.463	381.161	383.836	876.528	398.283	299.606	822.405	366.367
136	1.35	562.934	1307.12	207.443	602.019	1297.54	140.875	597.004	1292.94	277.206	685.74	1125.22	65.4408	718.527	1116.77	345.608	606.793	1069.79	209.993	719.301	789.572	-93.4464	449.986	839.362	-101.671	460.065	850.102	-24.9384	371.453	864.271	-51.2621	276.518	834.204	-37.1263	699.857	787.94	511.447	430.574	842.627	455.188	466.585	844.504	381.161	383.843	876.54	398.289	299.581	822.396	366.346
137	1.36	562.828	1307.11	207.517	601.956	1297.52	140.913	596.935	1292.93	277.236	685.747	1125.24	65.4542	718.592	1116.77	345.626	606.81	1069.79	210.032	719.33	789.6	-93.4319	449.979	839.37	-101.649	460.089	850.103	-24.9353	371.479	864.266	-51.2615	276.518	834.192	-37.1232	699.879	787.932	511.437	430.568	842.639	455.196	466.574	844.512	381.165	383.855	876.561	398.303	299.543	822.406	366.379
138	1.37	562.814	1307.08	207.556	601.93	1297.5	140.941	596.893	1292.89	277.267	685.755	1125.24	65.4674	718.624	1116.77	345.633	606.857	1069.77	210.047	719.292	789.617	-93.4461	449.981	839.359	-101.651	460.118	850.08	-24.94	371.497	864.244	-51.2568	276.517	834.184	-37.0918	699.945	787.946	511.433	430.567	842.657	455.206	466.541	844.531	381.149	383.861	876.556	398.302	299.487	822.453	366.402
139	1.38	562.816	1306.99	207.542	601.883	1297.47	140.948	596.811	1292.85	277.266	685.751	1125.23	65.4616	718.6	1116.78	345.632	606.86	1069.76	210.033	719.244	789.614	-93.4652	450.007	839.351	-101.679	460.117	850.088	-24.957	371.508	864.242	-51.2726	276.513	834.19	-37.0927	699.925	787.935	511.402	430.573	842.659	455.193	466.525	844.547	381.115	383.857	876.548	398.28	299.477	822.483	366.373
140	1.39	562.765	1306.96	207.535	601.756	1297.44	140.977	596.738	1292.82	277.27	685.755	1125.23	65.4674	718.604	1116.79	345.646	606.848	1069.77	210.032	719.248	789.622	-93.4547	450.01	839.344	-101.695	460.09	850.094	-24.9651	371.501	864.244	-51.2789	276.517	834.215	-37.0809	699.908	787.931	511.368	430.579	842.656	455.176	466.523	844.538	381.102	383.849	876.54	398.272	299.487	822.482	366.365
141	1.4	562.658	1306.97	207.603	601.647	1297.4	141.047	596.684	1292.8	277.287	685.769	1125.24	65.4834	718.626	1116.77	345.666	606.875	1069.76	210.055	719.284	789.64	-93.4403	450.014	839.329	-101.69	460.112	850.095	-24.9565	371.496	864.248	-51.2619	276.556	834.227	-37.0949	699.933	787.912	511.366	430.581	842.657	455.182	466.541	844.53	381.123	383.855	876.542	398.281	299.392	822.535	366.393
142	1.41	562.629	1306.98	207.691	601.65	1297.34	141.117	596.677	1292.8	277.335	685.806	1125.25	65.5062	718.662	1116.78	345.677	606.911	1069.75	210.099	719.295	789.646	-93.4433	450.029	839.355	-101.698	460.133	850.108	-24.9343	371.508	864.261	-51.249	276.549	834.23	-37.095	699.951	787.895	511.378	430.622	842.653	455.212	466.601	844.516	381.169	383.902	876.548	398.297	299.484	822.514	366.415
143	1.42	562.693	1306.93	207.731	601.604	1297.35	141.16	596.633	1292.8	277.374	685.809	1125.26	65.5313	718.669	1116.77	345.687	606.915	1069.75	210.114	719.285	789.656	-93.4502	449.981	839.39	-101.711	460.135	850.103	-24.9301	371.5	864.264	-51.247	276.53	834.214	-37.0855	699.935	787.867	511.378	430.626	842.624	455.212	466.612	844.517	381.169	383.891	876.54	398.304	299.642	822.435	366.395
144	1.43	562.802	1306.89	207.727	601.56	1297.35	141.202	596.599	1292.8	277.403	685.779	1125.26	65.5461	718.694	1116.74	345.698	606.914	1069.73	210.115	719.269	789.676	-93.4541	449.934	839.386	-101.71	460.083	850.099	-24.9278	371.471	864.269	-51.2415	276.508	834.194	-37.087	699.905	787.832	511.389	430.576	842.602	455.197	466.593	844.502	381.147	383.861	876.532	398.302	299.671	822.35	366.348
145	1.44	562.829	1306.91	207.766	601.603	1297.38	141.223	596.665	1292.8	277.435	685.793	1125.27	65.5648	718.693	1116.73	345.725	606.93	1069.72	210.137	719.286	789.701	-93.4349	449.93	839.409	-101.697	460.063	850.101	-24.9185	371.473	864.268	-51.2206	276.451	834.186	-37.0427	699.917	787.831	511.395	430.575	842.594	455.215	466.631	844.496	381.166	383.852	876.531	398.312	299.701	822.321	366.345
146	1.45	562.903	1306.96	207.821	601.671	1297.43	141.254	596.762	1292.83	277.489	685.819	1125.29	65.5983	718.695	1116.74	345.773	606.973	1069.72	210.184	719.307	789.724	-93.4155	449.977	839.397	-101.656	460.075	850.104	-24.8983	371.489	864.264	-51.2119	276.447	834.213	-37.0342	699.932	787.835	511.415	430.603	842.606	455.246	466.701	844.513	381.209	383.883	876.536	398.337	299.608	822.417	366.414
147	1.46	562.906	1307.04	207.838	601.727	1297.49	141.262	596.812	1292.89	277.529	685.811	1125.31	65.6177	718.684	1116.74	345.795	606.962	1069.74	210.196	719.308	789.733	-93.4	449.976	839.378	-101.619	460.061	850.103	-24.8811	371.47	864.267	-51.2233	276.462	834.213	-37.0277	699.911	787.816	511.417	430.6	842.615	455.242	466.677	844.526	381.227	383.872	876.535	398.342	299.606	822.442	366.442
148	1.47	562.887	1307.13	207.834	601.779	1297.56	141.245	596.879	1292.94	277.54	685.765	1125.33	65.6063	718.635	1116.75	345.799	606.946	1069.75	210.197	719.318	789.757	-93.3988	449.957	839.383	-101.644	460.063	850.111	-24.9206	371.459	864.268	-51.2489	276.452	834.208	-37.012	699.903	787.819	511.391	430.593	842.622	455.223	466.62	844.529	381.189	383.848	876.543	398.319	299.541	822.47	366.408
149	1.48	562.984	1307.22	207.846	601.932	1297.61	141.207	597.016	1292.98	277.544	685.761	1125.34	65.5972	718.63	1116.75	345.808	606.944	1069.78	210.188	719.283	789.753	-93.4214	450.001	839.36	-101.69	460.094	850.114	-24.9632	371.479	864.265	-51.2868	276.455	834.246	-37.0408	699.91	787.827	511.381	430.593	842.633	455.218	466.611	844.531	381.162	383.854	876.552	398.298	299.534	822.516	366.393
150	1.49	563.117	1307.3	207.851	602.02	1297.65	141.239	597.124	1293.04	277.585	685.767	1125.35	65.602	718.658	1116.77	345.812	606.955	1069.79	210.194	719.274	789.76	-93.4123	450.025	839.366	-101.686	460.109	850.113	-24.9529	371.494	864.245	-51.2914	276.474	834.241	-37.0413	699.925	787.832	511.398	430.578	842.64	455.228	466.59	844.52	381.162	383.85	876.559	398.302	299.611	822.526	366.384
151	1.5	563.191	1307.38	207.849	602.155	1297.71	141.225	597.213	1293.12	277.624	685.743	1125.36	65.6116	718.656	1116.77	345.84	606.963	1069.78	210.208	719.278	789.791	-93.4016	450.021	839.336	-101.684	460.066	850.116	-24.9359	371.449	864.244	-51.2704	276.536	834.213	-37.0718	699.908	787.82	511.417	430.588	842.653	455.236	466.528	844.515	381.149	383.852	876.554	398.303	299.569	822.508	366.372
152	1.51	563.868	1307.28	207.681	602.273	1297.77	141.204	597.39	1293.16	277.634	685.74	1125.36	65.6185	718.619	1116.75	345.864	606.986	1069.77	210.215	719.262	789.787	-93.4118	450.031	839.318	-101.712	460.076	850.099	-24.9427	371.465	864.218	-51.2945	276.551	834.212	-37.1107	699.884	787.811	511.426	430.563	842.652	455.225	466.52	844.535	381.137	383.846	876.562	398.299	299.497	822.509	366.371
153	1.52	564.865	1307.04	207.477	602.386	1297.82	141.227	597.61	1293.19	277.649	685.745	1125.37	65.6332	718.619	1116.73	345.861	607.026	1069.77	210.238	719.255	789.775	-93.4342	450.042	839.332	-101.685	460.113	850.08	-24.9484	371.497	864.203	-51.3037	276.549	834.184	-37.1596	699.87	787.808	511.442	430.509	842.647	455.223	466.567	844.537	381.138	383.85	876.559	398.303	299.446	822.52	366.388
154	1.53	564.544	1307.21	207.683	602.521	1297.86	141.268	597.77	1293.23	277.712	685.768	1125.36	65.6662	718.633	1116.72	345.894	607.026	1069.79	210.276	719.187	789.809	-93.2951	450.049	839.354	-101.66	460.097	850.079	-24.9123	371.484	864.226	-51.2628	276.561	834.171	-37.1377	699.869	787.795	511.457	430.515	842.633	455.241	466.596	844.537	381.177	383.86	876.574	398.317	299.472	822.446	366.398
155	1.54	565.137	1307.15	207.567	602.637	1297.92	141.339	597.87	1293.27	277.76	685.78	1125.36	65.6902	718.657	1116.7	345.918	607.085	1069.8	210.304	718.972	789.822	-93.0262	450.016	839.375	-101.666	460.065	850.08	-24.8776	371.447	864.254	-51.2076	276.457	834.187	-37.0595	699.877	787.791	511.484	430.531	842.613	455.249	466.587	844.534	381.201	383.843	876.578	398.337	299.484	822.458	366.408
156	1.55	564.692	1307.35	207.739	602.78	1297.97	141.382	597.959	1293.3	277.778	685.815	1125.36	65.6711	718.704	1116.68	345.927	607.123	1069.81	210.31	718.913	789.786	-92.957	450.024	839.392	-101.662	460.061	850.076	-24.8774	371.447	864.258	-51.2141	276.487	834.183	-37.0535	699.872	787.766	511.488	430.524	842.595	455.231	466.645	844.522	381.215	383.845	876.559	398.336	299.429	822.481	366.383
157	1.56	565.922	1307.04	207.466	602.894	1298.01	141.392	598.109	1293.33	277.798	685.857	1125.36	65.6675	718.769	1116.68	345.942	607.149	1069.85	210.322	719.035	789.802	-93.0346	450.031	839.386	-101.649	460.065	850.077	-24.8823	371.473	864.24	-51.235	276.494	834.18	-37.0331	699.863	787.759	511.473	430.538	842.601	455.224	466.705	844.509	381.238	383.845	876.546	398.321	299.44	822.474	366.367
158	1.57	566.303	1307.03	207.444	602.984	1298.06	141.457	598.237	1293.35	277.834	685.879	1125.37	65.6834	718.825	1116.71	345.952	607.166	1069.88	210.332	719.214	789.804	-93.2933	450.035	839.37	-101.648	460.065	850.089	-24.8628	371.476	864.229	-51.2328	276.498	834.2	-37.0432	699.871	787.768	511.486	430.558	842.614	455.234	466.687	844.506	381.236	383.843	876.542	398.325	299.393	822.517	366.419
159	1.58	566.586	1307.01	207.456	603.122	1298.09	141.5	598.36	1293.36	277.845	685.931	1125.39	65.6842	718.873	1116.72	345.98	607.215	1069.91	210.332	719.245	789.821	-93.3804	450.032	839.382	-101.675	460.064	850.104	-24.8564	371.48	864.229	-51.2141	276.488	834.234	-37.053	699.896	787.796	511.489	430.574	842.627	455.236	466.629	844.524	381.207	383.877	876.54	398.323	299.515	822.485	366.43
160	1.59	566.7	1307.04	207.509	603.278	1298.13	141.489	598.503	1293.38	277.85	685.978	1125.41	65.674	718.888	1116.73	345.974	607.267	1069.94	210.323	719.158	789.838	-93.2716	449.996	839.382	-101.689	460.087	850.1	-24.8816	371.484	864.23	-51.2361	276.521	834.211	-37.0967	699.898	787.802	511.468	430.548	842.64	455.218	466.533	844.55	381.149	383.854	876.552	398.307	299.518	822.477	366.4
161	1.6	566.072	1307.27	207.73	603.36	1298.18	141.506	598.575	1293.4	277.885	686.018	1125.44	65.6639	718.941	1116.74	345.959	607.26	1069.96	210.298	718.982	789.909	-92.9832	450.005	839.385	-101.67	460.083	850.109	-24.8984	371.469	864.229	-51.2457	276.534	834.214	-37.1247	699.876	787.794	511.447	430.518	842.643	455.186	466.449	844.554	381.103	383.813	876.549	398.291	299.539	822.464	366.36
162	1.61	564.723	1307.8	208.226	603.423	1298.21	141.582	598.641	1293.43	277.937	686.08	1125.46	65.6645	719.01	1116.75	345.975	607.269	1070.01	210.312	719.044	789.921	-93.039	450.005	839.366	-101.651	460.101	850.126	-24.8989	371.475	864.235	-51.2391	276.474	834.242	-37.0772	699.856	787.795	511.427	430.523	842.656	455.194	466.465	844.542	381.122	383.811	876.545	398.292	299.512	822.497	366.388
163	1.62	565.193	1307.73	208.204	603.543	1298.23	141.62	598.795	1293.43	277.984	686.121	1125.46	65.6751	719.057	1116.76	345.997	607.33	1070.05	210.328	719.121	789.898	-93.177	450.007	839.357	-101.64	460.114	850.129	-24.8853	371.51	864.224	-51.2279	276.529	834.217	-37.0605	699.873	787.803	511.435	430.548	842.674	455.225	466.504	844.545	381.132	383.839	876.549	398.29	299.508	822.535	366.41
164	1.63	566.716	1307.27	207.841	603.642	1298.28	141.626	598.942	1293.45	278.007	686.152	1125.49	65.6782	719.092	1116.75	345.993	607.412	1070.1	210.31	719.1	789.942	-93.0785	450	839.37	-101.64	460.101	850.129	-24.8939	371.512	864.241	-51.2442	276.538	834.229	-37.0991	699.9	787.806	511.414	430.571	842.67	455.229	466.512	844.557	381.134	383.849	876.554	398.299	299.583	822.48	366.4
165	1.64	567.094	1307.21	207.775	603.676	1298.33	141.667	599.095	1293.47	278.033	686.216	1125.53	65.6799	719.16	1116.75	345.988	607.415	1070.18	210.285	719.19	789.934	-93.1982	449.993	839.398	-101.652	460.086	850.14	-24.9029	371.478	864.233	-51.2473	276.552	834.209	-37.1403	699.901	787.789	511.395	430.551	842.655	455.202	466.533	844.548	381.147	383.861	876.57	398.3	299.55	822.486	366.375
166	1.65	567.325	1307.26	207.803	603.748	1298.4	141.732	599.291	1293.47	278.085	686.263	1125.54	65.6839	719.206	1116.76	345.993	607.472	1070.27	210.292	719.044	790.015	-93.0082	450.019	839.435	-101.672	460.123	850.141	-24.9157	371.49	864.234	-51.2503	276.558	834.205	-37.1334	699.911	787.775	511.401	430.576	842.632	455.211	466.615	844.552	381.183	383.895	876.577	398.305	299.583	822.447	366.341
167	1.66	567.566	1307.32	207.901	603.854	1298.42	141.795	599.426	1293.51	278.159	686.32	1125.57	65.7127	719.268	1116.75	346.012	607.57	1070.33	210.348	719.073	790.035	-93.0984	450.024	839.465	-101.637	460.169	850.143	-24.9008	371.527	864.246	-51.2291	276.572	834.188	-37.1079	699.925	787.776	511.42	430.616	842.623	455.24	466.737	844.564	381.257	383.907	876.589	398.345	299.664	822.449	366.365
168	1.67	567.708	1307.37	207.994	603.947	1298.44	141.841	599.529	1293.54	278.213	686.353	1125.59	65.7351	719.301	1116.76	346.021	607.584	1070.37	210.376	719.253	790.056	-93.3551	450.019	839.433	-101.624	460.174	850.124	-24.8849	371.523	864.235	-51.2211	276.599	834.172	-37.1206	699.92	787.794	511.436	430.622	842.627	455.247	466.749	844.549	381.275	383.895	876.587	398.358	299.642	822.466	366.406
169	1.68	567.78	1307.42	208.032	604.034	1298.46	141.877	599.66	1293.54	278.238	686.336	1125.6	65.7521	719.301	1116.77	346.034	607.598	1070.37	210.372	719.213	790.1	-93.3524	450.024	839.381	-101.643	460.16	850.105	-24.9035	371.531	864.201	-51.2456	276.594	834.168	-37.1251	699.886	787.8	511.445	430.599	842.606	455.23	466.706	844.539	381.24	383.883	876.568	398.335	299.634	822.392	366.389
170	1.69	567.908	1307.43	208.049	604.178	1298.47	141.9	599.79	1293.56	278.274	686.305	1125.6	65.7616	719.271	1116.78	346.046	607.663	1070.35	210.362	719.053	790.188	-93.195	450.061	839.33	-101.684	460.196	850.086	-24.9387	371.564	864.154	-51.2775	276.627	834.164	-37.1472	699.84	787.796	511.453	430.577	842.609	455.213	466.659	844.533	381.178	383.906	876.532	398.31	299.643	822.355	366.362
171	1.7	568.051	1307.45	208.099	604.253	1298.49	141.949	599.885	1293.59	278.319	686.276	1125.59	65.7811	719.274	1116.79	346.071	607.693	1070.33	210.42	719.017	790.291	-93.1709	450.028	839.318	-101.7	460.224	850.089	-24.9449	371.586	864.119	-51.2703	276.619	834.16	-37.1427	699.866	787.829	511.495	430.596	842.621	455.208	466.608	844.525	381.15	383.881	876.508	398.29	299.739	822.32	366.37
172	1.71	567.592	1307.75	208.304	604.302	1298.53	141.997	599.949	1293.66	278.336	686.222	1125.6	65.81	719.267	1116.83	346.091	607.613	1070.36	210.464	719.002	790.375	-93.1809	450.003	839.327	-101.714	460.191	850.135	-24.9577	371.555	864.146	-51.2795	276.59	834.198	-37.1485	699.874	787.867	511.529	430.566	842.648	455.203	466.517	844.544	381.134	383.834	876.511	398.271	299.677	822.373	366.385
173	1.72	566.278	1308.42	208.739	604.341	1298.59	142.027	599.967	1293.73	278.352	686.131	1125.64	65.8235	719.22	1116.87	346.118	607.515	1070.43	210.461	718.946	790.403	-93.2385	450	839.317	-101.728	460.186	850.181	-25.0088	371.526	864.167	-51.3289	276.573	834.209	-37.1685	699.826	787.888	511.536	430.511	842.67	455.198	466.499	844.56	381.132	383.816	876.533	398.245	299.501	822.499	366.382
174	1.73	566.501	1308.47	208.74	604.41	1298.67	142.07	600.035	1293.8	278.4	686.06	1125.67	65.8474	719.182	1116.9	346.149	607.505	1070.49	210.482	718.922	790.418	-93.243	449.989	839.351	-101.755	460.198	850.243	-25.0762	371.512	864.196	-51.3688	276.608	834.186	-37.2097	699.824	787.925	511.589	430.502	842.669	455.214	466.556	844.581	381.163	383.83	876.548	398.252	299.429	822.549	366.379
175	1.74	567.333	1308.29	208.587	604.513	1298.72	142.16	600.153	1293.84	278.483	686.01	1125.69	65.8974	719.17	1116.93	346.174	607.504	1070.56	210.551	718.966	790.355	-93.3044	449.964	839.371	-101.788	460.133	850.353	-25.1125	371.48	864.253	-51.3849	276.6	834.2	-37.2221	699.855	787.967	511.667	430.544	842.659	455.225	466.623	844.61	381.228	383.846	876.591	398.29	299.557	822.524	366.374
176	1.75	566.435	1308.71	208.978	604.577	1298.77	142.278	600.277	1293.85	278.583	685.92	1125.69	65.9384	719.17	1116.94	346.192	607.45	1070.64	210.624	719.095	790.231	-93.5113	449.959	839.346	-101.864	460.06	850.492	-25.1863	371.414	864.315	-51.4425	276.613	834.158	-37.3084	699.857	788.007	511.745	430.562	842.644	455.234	466.677	844.627	381.267	383.849	876.629	398.313	299.601	822.464	366.373
177	1.76	566.243	1308.82	209.14	604.667	1298.8	142.389	600.355	1293.85	278.657	685.801	1125.62	65.9335	719.118	1116.97	346.209	607.399	1070.67	210.654	719.036	790.169	-93.4339	449.962	839.293	-101.99	459.987	850.687	-25.3206	371.37	864.352	-51.59	276.57	834.168	-37.3933	699.813	788.038	511.791	430.526	842.63	455.223	466.712	844.618	381.262	383.873	876.62	398.302	299.556	822.454	366.361
178	1.77	566.205	1308.86	209.32	604.805	1298.8	142.507	600.476	1293.79	278.75	685.643	1125.53	65.9262	719.028	1117.07	346.226	607.405	1070.64	210.686	718.872	790.12	-93.3183	449.931	839.217	-102.091	459.845	850.972	-25.5014	371.3	864.361	-51.767	276.514	834.186	-37.4387	699.754	788.097	511.867	430.502	842.625	455.224	466.742	844.595	381.277	383.866	876.583	398.271	299.509	822.461	366.354
179	1.78	566.327	1308.87	209.456	604.95	1298.8	142.653	600.606	1293.75	278.862	685.459	1125.48	65.9566	718.96	1117.19	346.237	607.496	1070.57	210.728	718.906	790.034	-93.5587	449.873	839.104	-102.233	459.716	851.355	-25.7171	371.178	864.376	-51.9585	276.456	834.19	-37.4572	699.747	788.21	511.989	430.506	842.635	455.22	466.697	844.605	381.258	383.826	876.559	398.241	299.553	822.417	366.361
180	1.79	566.444	1308.87	209.594	605.075	1298.82	142.792	600.704	1293.7	278.967	685.267	1125.49	65.9985	718.865	1117.32	346.182	607.533	1070.52	210.719	718.789	790.009	-93.7115	449.793	838.986	-102.425	459.603	851.914	-25.9846	371.02	864.447	-52.2514	276.389	834.186	-37.5711	699.75	788.384	512.103	430.486	842.67	455.186	466.613	844.607	381.205	383.803	876.553	398.191	299.663	822.392	366.329
181	1.8	566.378	1308.91	209.742	605.211	1298.84	142.903	600.75	1293.64	279.061	685.098	1125.5	66.0302	718.785	1117.47	346.07	607.457	1070.53	210.676	718.574	790.049	-93.9338	449.676	838.846	-102.586	459.593	852.605	-26.3314	370.808	864.578	-52.6432	276.354	834.182	-37.7972	699.746	788.614	512.201	430.433	842.713	455.143	466.609	844.62	381.182	383.761	876.565	398.132	299.634	822.408	366.285
182	1.81	566.381	1308.95	209.876	605.215	1298.92	143.07	600.832	1293.61	279.192	684.921	1125.55	66.0848	718.718	1117.64	345.96	607.4	1070.55	210.646	718.272	790.206	-94.2445	449.564	838.715	-102.738	459.674	853.409	-26.7659	370.592	864.783	-53.0763	276.248	834.168	-38.0553	699.738	788.946	512.35	430.379	842.753	455.105	466.545	844.652	381.149	383.753	876.563	398.072	299.534	822.425	366.243
183	1.82	566.401	1308.97	210.086	605.263	1299.03	143.306	600.974	1293.58	279.36	684.764	1125.62	66.1955	718.642	1117.85	345.877	607.407	1070.57	210.665	717.898	790.543	-94.5438	449.382	838.714	-102.898	459.722	854.326	-27.1981	370.43	865.066	-53.5122	276.074	834.181	-38.2395	699.7	789.319	512.557	430.354	842.804	455.104	466.491	844.729	381.145	383.78	876.583	398.048	299.546	822.465	366.237
184	1.83	566.468	1308.98	210.252	605.332	1299.15	143.494	601.035	1293.57	279.524	684.625	1125.69	66.3421	718.567	1118.03	345.81	607.388	1070.64	210.687	717.533	790.982	-94.776	449.106	838.795	-103.108	459.484	855.291	-27.6202	370.231	865.416	-53.9449	275.823	834.221	-38.4188	699.62	789.661	512.816	430.344	842.827	455.106	466.53	844.807	381.184	383.785	876.625	398.034	299.532	822.501	366.224
185	1.84	566.588	1308.98	210.375	605.369	1299.24	143.628	601.051	1293.57	279.694	684.481	1125.73	66.473	718.431	1118.2	345.774	607.245	1070.77	210.703	717.302	791.356	-95.2523	448.76	838.94	-103.382	459.121	856.329	-28.0855	369.912	865.84	-54.4367	275.435	834.263	-38.6457	699.54	789.995	513.074	430.271	842.823	455.088	466.558	844.86	381.219	383.754	876.632	397.999	299.468	822.483	366.182
186	1.85	566.731	1309.01	210.489	605.392	1299.29	143.781	601.138	1293.58	279.83	684.421	1125.72	66.6037	718.331	1118.37	345.755	607.17	1070.84	210.715	717.094	791.688	-95.8789	448.421	839.063	-103.662	458.978	857.465	-28.5772	369.509	866.325	-55.0205	275.012	834.36	-38.9249	699.464	790.343	513.373	430.228	842.819	455.079	466.573	844.891	381.27	383.726	876.623	397.956	299.348	822.48	366.109
187	1.86	566.987	1309.02	210.642	605.506	1299.33	143.892	601.337	1293.55	279.951	684.444	1125.67	66.7138	718.297	1118.52	345.754	607.237	1070.84	210.758	716.853	791.935	-96.6004	448.14	839.164	-103.922	458.964	858.696	-29.1315	369.142	866.813	-55.7034	274.591	834.566	-39.2065	699.433	790.724	513.677	430.218	842.805	455.092	466.632	844.906	381.318	383.752	876.59	397.912	299.394	822.44	366.052
188	1.87	567.206	1309.06	210.785	605.616	1299.33	143.985	601.511	1293.51	280.059	684.513	1125.57	66.791	718.265	1118.7	345.738	607.263	1070.87	210.767	716.698	792.182	-97.4912	447.876	839.285	-104.116	458.763	860.202	-29.6847	368.78	867.35	-56.3898	274.308	835.003	-39.6336	699.369	791.08	513.965	430.186	842.807	455.101	466.686	844.908	381.355	383.758	876.528	397.868	299.501	822.39	366.006
189	1.88	567.286	1309.13	210.892	605.706	1299.34	144.083	601.637	1293.5	280.115	684.609	1125.46	66.8178	718.245	1118.87	345.705	607.278	1070.9	210.744	716.7	792.446	-98.5566	447.617	839.432	-104.245	458.59	861.93	-30.3295	368.33	868.083	-57.0832	274.225	835.756	-40.2339	699.273	791.43	514.218	430.133	842.794	455.088	466.723	844.924	381.394	383.708	876.488	397.795	299.39	822.444	365.964
190	1.89	567.341	1309.17	210.996	605.799	1299.35	144.151	601.795	1293.46	280.193	684.728	1125.37	66.8089	718.215	1119.03	345.678	607.272	1070.93	210.735	716.343	792.65	-99.2832	447.389	839.662	-104.387	458.381	863.775	-31.1005	367.86	869.121	-57.832	274.218	836.887	-40.8077	699.171	791.762	514.476	430.061	842.813	455.062	466.745	844.974	381.404	383.71	876.484	397.722	299.35	822.457	365.847
191	1.9	567.63	1309.12	211.064	605.944	1299.38	144.224	601.922	1293.47	280.323	684.865	1125.29	66.8168	718.215	1119.2	345.627	607.304	1070.99	210.772	715.873	792.849	-99.7813	447.061	840.158	-104.557	458.068	865.83	-31.7563	367.461	870.276	-58.5274	274.039	838.236	-41.2378	699.075	792.106	514.762	430.036	842.849	455.074	466.756	845.034	381.406	383.74	876.497	397.672	299.519	822.387	365.778
192	1.91	567.86	1309.08	211.127	606.081	1299.45	144.322	602.019	1293.48	280.473	684.976	1125.22	66.8315	718.338	1119.37	345.507	607.291	1071.13	210.804	715.259	792.991	-100.178	446.65	841.008	-104.649	457.834	867.898	-32.3542	367.008	871.614	-59.1482	273.724	839.638	-41.5422	698.992	792.409	515.046	429.99	842.881	455.064	466.737	845.083	381.415	383.781	876.517	397.626	299.644	822.367	365.734
193	1.92	567.879	1309.08	211.223	606.169	1299.51	144.407	602.101	1293.47	280.567	685.119	1125.17	66.8178	718.567	1119.52	345.326	607.207	1071.27	210.791	714.561	793.097	-100.504	446.111	842.055	-104.596	457.578	870.066	-32.8574	366.496	873.231	-59.6549	273.314	841.328	-41.7763	698.911	792.673	515.281	429.922	842.89	455.028	466.703	845.141	381.432	383.783	876.529	397.569	299.568	822.362	365.675
194	1.93	567.921	1309.09	211.335	606.296	1299.57	144.447	602.262	1293.43	280.619	685.285	1125.1	66.7811	718.636	1119.65	345.237	607.196	1071.35	210.744	713.414	793.088	-100.72	445.594	843.085	-104.492	457.332	872.201	-33.2166	365.962	874.939	-60.0385	272.689	843.388	-41.7024	698.854	792.924	515.497	429.883	842.893	454.999	466.756	845.158	381.447	383.769	876.512	397.51	299.547	822.352	365.644
195	1.94	568.083	1309.08	211.382	606.488	1299.61	144.472	602.491	1293.34	280.656	685.478	1125.07	66.7608	718.686	1119.77	345.152	607.287	1071.42	210.684	712.059	793.018	-100.887	444.943	844.214	-104.316	456.978	874.448	-33.4885	365.397	876.766	-60.2984	271.834	845.935	-40.9716	698.836	793.173	515.693	429.912	842.9	454.986	466.839	845.148	381.468	383.785	876.477	397.468	299.564	822.357	365.633
196	1.95	568.227	1309.16	211.361	606.651	1299.64	144.452	602.662	1293.26	280.654	685.655	1125.07	66.7635	718.755	1119.85	345.064	607.382	1071.47	210.57	711.239	793.066	-101.362	443.98	845.522	-104.146	456.444	876.512	-33.6336	364.712	878.803	-60.4017	270.985	848.856	-40.1988	698.851	793.435	515.857	429.952	842.917	454.961	466.83	845.132	381.467	383.79	876.442	397.41	299.559	822.389	365.582
197	1.96	568.234	1309.25	211.32	606.751	1299.68	144.41	602.806	1293.24	280.601	685.823	1125.08	66.7401	718.865	1119.95	344.971	607.411	1071.55	210.448	710.044	793.004	-101.599	443.031	846.862	-103.923	455.823	878.658	-33.7144	364.008	880.933	-60.3989	270.288	851.789	-39.664	698.842	793.672	515.973	429.912	842.938	454.911	466.814	845.107	381.437	383.776	876.42	397.342	299.478	822.435	365.526
198	1.97	568.337	1309.31	211.258	606.896	1299.72	144.335	602.943	1293.25	280.498	685.955	1125.12	66.7219	718.917	1120.04	344.894	607.45	1071.65	210.349	708.72	793.062	-101.795	441.974	848.256	-103.486	455.102	880.517	-33.6991	363.269	883.147	-60.3053	269.433	854.695	-39.2864	698.807	793.86	516.073	429.896	842.951	454.889	466.868	845.076	381.415	383.791	876.422	397.297	299.425	822.512	365.488
199	1.98	568.664	1309.34	211.162	607.024	1299.75	144.301	603.083	1293.35	280.468	686.11	1125.2	66.7738	718.976	1120.1	344.843	607.479	1071.76	210.329	707.348	793.319	-101.998	440.602	849.628	-102.939	454.342	882.523	-33.5856	362.482	885.39	-59.9919	268.455	857.615	-38.5739	698.775	793.999	516.136	429.937	842.968	454.906	466.87	845.094	381.422	383.794	876.435	397.309	299.502	822.49	365.485
200	1.99	568.99	1309.37	211.086	607.188	1299.81	144.284	603.22	1293.48	280.466	686.252	1125.31	66.8476	719.039	1120.18	344.823	607.448	1071.94	210.346	705.987	793.62	-102.207	439.387	850.855	-102.342	453.578	884.426	-33.4422	361.593	887.722	-59.516	267.504	860.685	-37.3047	698.796	794.074	516.132	429.959	842.976	454.919	466.84	845.142	381.453	383.764	876.443	397.333	299.527	822.458	365.506
201	2	569.106	1309.39	211.012	607.32	1299.83	144.238	603.322	1293.56	280.388	686.347	1125.39	66.9036	719.09	1120.26	344.796	607.439	1072.08	210.363	704.409	793.769	-102.423	438.046	852.155	-101.65	452.592	886.209	-33.1483	360.558	889.962	-58.9223	266.61	863.725	-35.8037	698.801	794.09	516.077	429.932	842.963	454.914	466.83	845.169	381.459	383.768	876.446	397.361	299.468	822.446	365.521
202	2.01	569.213	1309.41	210.905	607.487	1299.84	144.171	603.457	1293.66	280.309	686.398	1125.43	66.9519	719.128	1120.32	344.771	607.494	1072.16	210.389	702.509	793.753	-102.652	436.53	853.302	-100.768	451.635	888.25	-32.7356	359.52	892.218	-58.073	265.576	866.989	-33.9224	698.825	794.084	515.973	429.93	842.931	454.903	466.819	845.166	381.425	383.774	876.455	397.401	299.45	822.411	365.523
203	2.02	569.463	1309.43	210.828	607.644	1299.86	144.146	603.603	1293.77	280.252	686.399	1125.43	66.9943	719.186	1120.36	344.727	607.528	1072.25	210.432	700.451	793.677	-102.957	434.805	854.451	-99.5625	450.767	890.428	-32.1437	358.463	894.503	-56.8616	264.576	870.159	-31.7335	698.878	794.059	515.814	429.967	842.915	454.912	466.811	845.167	381.4	383.799	876.451	397.423	299.609	822.327	365.507
204	2.03	569.724	1309.48	210.785	607.804	1299.89	144.121	603.764	1293.85	280.195	686.33	1125.42	67.0307	719.252	1120.4	344.652	607.498	1072.33	210.493	698.501	793.693	-103.317	433.269	855.88	-98.1551	449.852	892.668	-31.3516	357.574	896.806	-55.4205	263.544	873.148	-29.0177	698.99	794.04	515.601	430.026	842.927	454.924	466.778	845.177	381.369	383.857	876.44	397.435	299.666	822.304	365.526
205	2.04	569.758	1309.61	210.77	607.985	1299.93	144.049	603.903	1293.93	280.13	686.223	1125.38	67.0022	719.282	1120.43	344.548	607.441	1072.39	210.506	696.452	793.73	-103.683	431.842	857.473	-96.5619	448.942	895.158	-30.4571	356.611	899.337	-53.708	262.764	876.165	-25.9904	699.078	794.033	515.365	430.078	842.936	454.914	466.79	845.158	381.355	383.873	876.431	397.436	299.585	822.357	365.546
206	2.05	569.766	1309.78	210.715	608.118	1300	143.989	604.049	1294.04	280.075	686.079	1125.33	66.947	719.286	1120.49	344.439	607.401	1072.42	210.495	694.369	793.891	-104.103	430.29	859.287	-94.847	448.311	897.64	-29.4161	355.576	902.073	-51.8051	262.095	879.362	-22.7892	699.148	794.009	515.137	430.101	842.95	454.903	466.789	845.121	381.307	383.863	876.418	397.452	299.521	822.422	365.525
207	2.06	569.979	1309.95	210.672	608.262	1300.09	143.956	604.234	1294.15	280.064	685.935	1125.3	66.9061	719.327	1120.58	344.325	607.35	1072.47	210.501	692.427	794.13	-104.564	428.78	861.055	-92.9896	447.767	900.293	-28.1756	354.743	904.943	-49.6794	261.494	882.736	-19.208	699.25	794.029	514.944	430.163	842.964	454.888	466.801	845.091	381.264	383.883	876.421	397.48	299.598	822.421	365.508
208	2.07	570.176	1310.07	210.676	608.363	1300.16	143.935	604.41	1294.31	280.063	685.778	1125.31	66.9033	719.349	1120.68	344.247	607.262	1072.57	210.559	690.401	794.285	-104.923	427.08	863.045	-90.903	447.374	903.024	-26.8867	354.035	907.995	-47.3761	261.057	886.572	-15.3108	699.353	794.054	514.775	430.218	842.975	454.873	466.816	845.089	381.257	383.919	876.441	397.527	299.719	822.406	365.517
209	2.08	570.257	1310.22	210.662	608.402	1300.27	143.937	604.53	1294.5	280.085	685.614	1125.33	66.9171	719.38	1120.79	344.167	607.073	1072.71	210.625	688.028	794.448	-105.262	425.632	865.052	-88.6581	446.798	905.821	-25.4767	353.273	911.204	-44.8733	260.74	890.904	-11.0669	699.414	794.083	514.623	430.248	842.965	454.869	466.829	845.106	381.285	383.935	876.457	397.589	299.69	822.424	365.548
210	2.09	570.31	1310.35	210.687	608.41	1300.36	143.943	604.668	1294.67	280.106	685.436	1125.36	66.9575	719.411	1120.9	344.102	606.942	1072.83	210.691	685.689	794.756	-105.612	423.86	867.102	-86.1314	446.172	908.848	-23.941	352.59	914.539	-42.1834	260.447	895.48	-6.37804	699.485	794.125	514.487	430.267	842.948	454.914	466.844	845.138	381.322	383.937	876.482	397.674	299.623	822.443	365.586
211	2.1	570.481	1310.41	210.705	608.46	1300.41	143.92	604.852	1294.77	280.094	685.272	1125.39	66.9944	719.468	1120.97	344.042	606.929	1072.85	210.764	683.492	795.06	-106.071	422.276	869.165	-83.5779	445.749	911.822	-22.4592	352.079	918.06	-39.3548	260.329	900.188	-1.62719	699.591	794.192	514.362	430.303	842.938	454.955	466.854	845.166	381.341	383.958	876.488	397.739	299.714	822.418	365.632
212	2.11	570.775	1310.45	210.691	608.496	1300.43	143.908	605.018	1294.87	280.036	685.101	1125.41	67.0239	719.566	1121.02	343.952	606.886	1072.87	210.821	681.229	795.276	-106.575	420.788	871.372	-80.8544	445.529	914.842	-20.9054	351.582	921.635	-36.5544	260.427	905.027	3.22469	699.704	794.281	514.263	430.338	842.919	454.974	466.824	845.173	381.32	383.977	876.467	397.785	299.812	822.381	365.677
213	2.12	570.936	1310.54	210.652	608.511	1300.42	143.847	605.151	1294.93	279.942	684.938	1125.27	67.1193	719.627	1121.06	343.875	606.836	1072.85	210.839	678.586	795.484	-106.957	419.188	873.666	-77.993	445.363	918.238	-19.3296	351.152	925.311	-33.6667	260.679	909.965	8.10374	699.793	794.377	514.173	430.35	842.908	454.964	466.813	845.165	381.309	383.957	876.441	397.8	299.868	822.376	365.653
214	2.13	570.93	1310.62	210.611	608.615	1300.39	143.717	605.389	1294.95	279.797	684.837	1124.95	67.3254	719.655	1121.12	343.802	606.867	1072.81	210.826	675.876	795.657	-107.356	417.805	875.91	-75.048	445.047	921.674	-17.7946	350.785	929.128	-30.8069	260.848	915.066	13.1224	699.91	794.5	514.109	430.357	842.9	454.965	466.839	845.143	381.298	383.93	876.433	397.806	299.857	822.388	365.608
215	2.14	571.008	1310.69	210.553	608.746	1300.37	143.561	605.615	1295.02	279.655	684.741	1124.88	67.3987	719.723	1121.2	343.747	606.905	1072.78	210.847	673.243	795.826	-107.786	416.281	878.381	-71.9548	444.981	925.116	-16.3283	350.568	933.033	-27.8682	261.374	920.44	18.0222	699.986	794.601	514.062	430.382	842.908	454.964	466.842	845.122	381.276	383.941	876.426	397.808	299.909	822.397	365.604
216	2.15	571.242	1310.72	210.473	608.761	1300.37	143.481	605.767	1295.13	279.556	684.647	1124.92	67.4617	719.764	1121.25	343.683	606.872	1072.85	210.884	670.699	796.206	-108.108	414.897	880.973	-68.7425	445.049	928.749	-14.7605	350.421	937.126	-24.7855	262.118	926.144	23.0767	700.031	794.73	514.056	430.418	842.916	454.948	466.82	845.141	381.255	383.949	876.434	397.81	299.981	822.383	365.602
217	2.16	571.249	1310.79	210.365	608.74	1300.4	143.402	605.799	1295.3	279.473	684.449	1125.18	67.4599	719.768	1121.31	343.608	606.691	1072.98	210.938	668.012	796.546	-108.285	413.539	883.556	-65.2536	445.106	932.569	-13.1386	350.3	941.413	-21.5579	263.071	932.018	28.2683	700.045	794.857	514.081	430.392	842.926	454.929	466.796	845.184	381.268	383.962	876.463	397.801	299.908	822.403	365.634
218	2.17	571.176	1310.86	210.222	608.694	1300.42	143.302	605.886	1295.44	279.343	684.245	1125.66	67.3329	719.736	1121.35	343.534	606.554	1073.08	210.964	665.298	796.84	-108.468	412.279	886.252	-61.6487	445.1	936.561	-11.612	350.347	945.878	-18.3672	264.32	938.094	33.6519	700.014	794.963	514.12	430.358	842.936	454.924	466.836	845.217	381.307	384.004	876.482	397.8	299.904	822.414	365.65
219	2.18	571.172	1310.91	210.105	608.725	1300.43	143.13	605.977	1295.55	279.223	684.187	1125.83	67.359	719.742	1121.4	343.466	606.498	1073.15	211.002	662.598	797.223	-108.638	411.188	889.162	-58.007	445.242	940.655	-10.1974	350.719	950.425	-15.1723	266.072	944.36	39.063	699.999	795.084	514.172	430.37	842.933	454.931	466.855	845.242	381.327	384.029	876.501	397.812	299.843	822.442	365.655
220	2.19	571.274	1310.95	209.949	608.806	1300.41	142.954	606.043	1295.65	279.088	684.146	1125.92	67.4329	719.735	1121.46	343.408	606.505	1073.17	211.035	659.835	797.596	-108.743	410.03	892.043	-54.0095	445.769	944.843	-8.77779	351.161	955.137	-11.8744	268.193	951.159	44.4817	700.006	795.213	514.248	430.398	842.94	454.941	466.857	845.255	381.334	384.044	876.499	397.828	299.927	822.408	365.667
221	2.2	571.12	1311.04	209.789	608.85	1300.4	142.768	606.012	1295.72	278.921	684.045	1126	67.5049	719.705	1121.52	343.348	606.492	1073.13	211.014	656.915	797.855	-108.835	409.212	895.037	-49.8464	446.357	949.224	-7.55862	351.643	959.917	-8.56556	270.667	958.446	49.9212	700.027	795.36	514.32	430.391	842.957	454.964	466.864	845.25	381.353	384.037	876.486	397.821	299.916	822.433	365.681
222	2.21	571.612	1310.88	209.382	608.917	1300.37	142.556	605.931	1295.75	278.725	683.956	1126.08	67.5711	719.655	1121.59	343.274	606.472	1073.05	210.97	654.001	798.175	-108.955	408.499	898.127	-45.68	446.962	953.73	-6.45102	352.33	964.726	-5.16949	273.237	966.193	55.8002	700.037	795.49	514.373	430.364	842.949	454.961	466.865	845.233	381.345	383.988	876.47	397.792	299.771	822.493	365.677
223	2.22	572.581	1310.56	208.849	608.971	1300.31	142.335	605.905	1295.79	278.521	683.9	1126.13	67.67	719.618	1121.66	343.208	606.515	1072.98	210.919	650.882	798.623	-108.982	407.59	901.449	-41.2573	447.557	958.279	-5.45631	353.18	969.726	-1.75113	276.242	974.124	61.9225	700.02	795.608	514.435	430.362	842.939	454.96	466.841	845.207	381.319	383.965	876.457	397.768	299.873	822.475	365.634
224	2.23	571.529	1310.87	208.936	609.02	1300.25	142.143	605.856	1295.84	278.353	683.898	1126.16	67.7942	719.609	1121.7	343.16	606.541	1072.93	210.893	647.847	799.047	-108.964	406.907	904.896	-36.6241	448.197	962.934	-4.53921	354.069	974.767	1.697	279.295	982.367	68.2471	700.03	795.733	514.522	430.372	842.935	454.939	466.725	845.39	381.15	383.98	876.429	397.759	299.992	822.41	365.606
225	2.24	571.124	1310.96	208.786	609.085	1300.21	141.937	605.789	1295.9	278.188	683.949	1126.23	67.9403	719.588	1121.74	343.126	606.491	1072.95	210.911	644.797	799.66	-108.966	406.281	908.467	-32.0782	448.797	967.75	-3.6252	355.029	979.817	5.24995	283.11	991.068	74.1157	700.018	795.834	514.591	430.361	842.925	454.931	466.522	845.833	380.828	383.998	876.415	397.739	299.902	822.414	365.619
226	2.25	570.778	1311.05	208.595	609.107	1300.2	141.725	605.717	1295.97	278.034	684.015	1126.35	68.1167	719.544	1121.76	343.095	606.43	1073.01	210.928	641.575	800.336	-108.857	405.402	912.228	-27.4554	449.353	972.34	-2.57864	356.077	985.076	8.90136	286.832	999.533	80.2476	699.952	795.896	514.654	430.321	842.916	454.939	466.554	845.774	380.908	384.002	876.405	397.741	299.848	822.401	365.645
227	2.26	571.429	1310.87	208.152	609.136	1300.18	141.519	605.66	1296.02	277.848	684.128	1126.47	68.2941	719.547	1121.79	343.076	606.411	1073.06	210.931	638.37	801.041	-108.661	405.344	916.12	-22.4406	449.951	976.53	-1.35152	357.236	990.379	12.5796	290.791	1008.37	85.9941	699.906	795.972	514.725	430.29	842.926	454.941	466.742	845.562	381.141	384.019	876.414	397.736	299.892	822.375	365.652
228	2.27	573.096	1310.4	207.41	609.256	1300.14	141.243	605.612	1296.06	277.617	684.436	1126.4	68.5352	719.585	1121.84	343.046	606.454	1073.09	210.918	634.96	801.864	-108.511	405.413	920.2	-17.6317	450.649	981.018	-0.17358	358.342	996.083	16.2147	294.904	1017.06	91.5248	699.907	796.057	514.793	430.321	842.942	454.929	466.643	845.907	380.927	384.055	876.443	397.718	299.926	822.352	365.647
229	2.28	572.835	1310.46	207.223	609.364	1300.09	140.957	605.503	1296.12	277.366	684.841	1126.3	68.7733	719.607	1121.89	343.018	606.48	1073.1	210.873	631.508	802.657	-108.339	405.207	924.59	-13.0123	451.282	985.56	0.90389	359.482	1002.04	19.6741	299.332	1025.9	96.5044	699.901	796.135	514.85	430.322	842.975	454.921	466.554	846.018	380.83	384.046	876.46	397.706	299.846	822.423	365.654
230	2.29	571.376	1310.95	207.368	609.354	1299.99	140.697	605.308	1296.2	277.097	684.908	1126.56	68.8923	719.588	1121.93	343	606.488	1073.11	210.824	627.915	803.541	-108.094	404.546	929.273	-8.24464	452.119	990.057	2.15019	361.272	1007.59	23.105	303.975	1034.77	101.213	699.879	796.203	514.878	430.276	843.011	454.929	466.549	845.865	380.942	383.998	876.473	397.701	299.808	822.457	365.651
231	2.3	571.118	1311.09	207.148	609.398	1299.89	140.434	605.219	1296.25	276.818	685.296	1126.53	69.1007	719.593	1121.95	342.987	606.54	1073.1	210.775	624.185	804.449	-107.793	403.821	934.11	-3.52414	452.92	994.512	3.40665	363.223	1013.08	26.686	308.467	1043.51	105.748	699.87	796.252	514.891	430.238	843.018	454.918	466.686	845.437	381.217	383.974	876.461	397.67	299.809	822.489	365.638
232	2.31	571.3	1311.08	206.841	609.498	1299.76	140.169	605.184	1296.27	276.564	685.223	1127.05	69.1907	719.666	1121.98	342.964	606.767	1073.01	210.698	620.41	805.431	-107.54	404.881	938.81	0.73309	453.922	998.894	4.75688	365.333	1018.49	30.6249	313.508	1052	109.793	699.874	796.275	514.896	430.275	843.008	454.917	466.699	845.322	381.246	383.975	876.457	397.645	299.891	822.467	365.621
233	2.32	571.376	1311.08	206.559	609.58	1299.66	139.924	605.186	1296.3	276.302	685.374	1127.26	69.3655	719.716	1121.99	342.953	606.87	1072.95	210.612	616.693	806.466	-107.212	406.257	943.338	5.76159	454.766	1003.27	6.10191	367.396	1024.07	34.2225	318.883	1060.37	113.449	699.871	796.269	514.889	430.265	843.004	454.895	466.7	845.262	381.228	383.968	876.447	397.617	299.955	822.394	365.593
234	2.33	571.415	1311.09	206.304	609.622	1299.59	139.743	605.159	1296.37	276.093	685.608	1127.39	69.5361	719.741	1121.97	342.962	606.879	1072.94	210.59	612.822	807.497	-106.942	408.174	947.597	9.78197	455.85	1007.66	7.48696	369.458	1029.79	37.6967	323.042	1068.86	117.659	699.843	796.259	514.893	430.231	842.985	454.885	466.634	845.422	381.101	383.934	876.428	397.616	299.798	822.403	365.582
235	2.34	571.502	1311.09	206.089	609.633	1299.55	139.609	605.178	1296.45	275.917	685.819	1127.52	69.7518	719.792	1121.95	342.983	606.903	1072.99	210.627	609.049	808.471	-106.617	409.084	952.412	13.9379	456.895	1012.11	8.94495	371.617	1035.49	41.017	327.695	1077.33	121.405	699.847	796.24	514.891	430.268	842.965	454.888	466.542	845.839	380.847	383.971	876.42	397.627	299.767	822.398	365.608
236	2.35	571.667	1311.11	205.887	609.67	1299.53	139.494	605.275	1296.55	275.725	686.098	1127.67	69.9747	719.881	1121.93	343.007	606.961	1073.04	210.683	605.102	809.65	-106.159	410.027	957.234	17.9939	457.93	1016.57	10.4134	373.797	1041.19	44.2363	332.528	1085.47	124.885	699.858	796.192	514.881	430.356	842.946	454.912	466.692	845.744	380.97	384.05	876.419	397.646	299.882	822.361	365.647
237	2.36	571.71	1311.16	205.705	609.739	1299.52	139.342	605.375	1296.65	275.522	686.295	1127.81	70.176	719.958	1121.91	343	606.953	1073.1	210.726	600.944	811.318	-105.755	410.21	962.523	22.0965	458.899	1021.01	11.9447	376.099	1046.86	47.4352	337.559	1093.34	128.183	699.881	796.161	514.876	430.369	842.93	454.92	466.819	845.533	381.142	384.051	876.42	397.666	299.867	822.379	365.667
238	2.37	571.767	1311.24	205.5	609.883	1299.52	139.163	605.459	1296.76	275.33	686.365	1127.96	70.3812	720.016	1121.93	342.998	606.938	1073.16	210.731	596.656	812.819	-105.31	410.165	967.864	26.1745	459.841	1025.29	13.4047	378.547	1052.45	50.5211	342.563	1101.06	131.142	699.882	796.13	514.829	430.352	842.938	454.915	466.723	845.67	381.034	384.041	876.421	397.68	299.812	822.422	365.661
239	2.38	571.897	1311.35	205.285	610.058	1299.53	139	605.604	1296.84	275.156	686.476	1128.11	70.5721	720.079	1121.91	342.998	607.04	1073.2	210.725	592.228	814.143	-104.992	412.123	972.167	29.4103	461.011	1029.32	14.9725	380.946	1057.96	53.5559	347.634	1108.73	133.876	699.914	796.108	514.774	430.338	842.946	454.901	466.859	845.329	381.272	384.044	876.434	397.68	299.858	822.42	365.651
240	2.39	572.044	1311.49	205.099	610.327	1299.54	138.807	605.742	1296.96	275.047	686.613	1128.27	70.7734	720.153	1121.89	343.018	607.225	1073.19	210.731	588.1	815.614	-104.562	412.842	977.046	33.041	462.041	1033.27	16.3571	383.209	1063.22	56.5394	352.507	1116.06	136.338	699.978	796.092	514.733	430.365	842.965	454.899	466.863	845.251	381.295	384.034	876.435	397.67	299.904	822.436	365.648
241	2.4	572.216	1311.67	204.88	610.526	1299.56	138.639	605.87	1297.06	274.955	686.744	1128.46	71.0397	720.223	1121.88	343.03	607.283	1073.2	210.738	584.413	817.278	-104.161	413.191	982.038	36.6356	463.015	1037.24	17.7894	385.443	1068.35	59.3193	357.697	1123.05	138.467	699.992	796.064	514.693	430.366	842.98	454.889	466.801	845.237	381.283	384.022	876.439	397.667	299.885	822.444	365.619
242	2.41	572.406	1311.81	204.675	610.774	1299.6	138.463	606.121	1297.17	274.816	686.792	1128.67	71.4501	720.288	1121.86	343.032	607.305	1073.22	210.744	580.627	819.112	-103.615	415.398	986.16	39.4443	463.898	1041.23	18.9816	387.643	1073.35	62.0143	362.738	1129.64	140.51	700	796.01	514.641	430.35	842.972	454.892	466.805	845.241	381.283	384.043	876.437	397.672	299.902	822.43	365.591
243	2.42	572.657	1311.89	204.507	611.097	1299.64	138.285	606.477	1297.24	274.688	686.636	1128.95	72.0806	720.354	1121.85	343.05	607.427	1073.2	210.755	576.849	821.024	-103.12	416.943	990.552	42.4903	464.996	1045.02	20.21	389.967	1078.16	64.6243	367.021	1136.02	142.766	700.007	795.953	514.611	430.354	842.966	454.91	466.844	845.225	381.291	384.07	876.433	397.686	299.959	822.411	365.616
244	2.43	572.961	1311.94	204.388	611.388	1299.67	138.165	606.815	1297.33	274.596	686.764	1129.17	72.3966	720.398	1121.82	343.067	607.518	1073.21	210.746	572.867	822.855	-102.561	418.176	994.908	45.6614	466.905	1048.66	21.2348	392.247	1082.8	67.1405	371.615	1141.96	144.747	700.014	795.886	514.573	430.37	842.956	454.917	466.757	845.395	381.147	384.071	876.435	397.709	299.987	822.446	365.644
245	2.44	573.103	1312.04	204.251	611.634	1299.69	138.043	607.081	1297.44	274.489	687.396	1129.21	72.1956	720.42	1121.78	343.06	607.534	1073.24	210.737	569.183	824.863	-102.113	418.55	999.481	48.9192	469.926	1052.31	21.9141	394.445	1087.52	69.5224	375.275	1147.86	147.253	700.031	795.818	514.53	430.388	842.949	454.92	466.686	845.626	380.986	384.043	876.438	397.717	299.938	822.449	365.664
246	2.45	573.215	1312.19	204.165	611.858	1299.71	137.899	607.344	1297.57	274.372	687.783	1129.33	72.2756	720.551	1121.73	342.997	607.593	1073.25	210.715	565.558	826.927	-101.599	418.803	1004.09	52.1354	470.846	1055.85	23.4549	396.496	1092.03	72.0168	379.636	1153.42	149.511	700.047	795.766	514.495	430.39	842.949	454.914	466.915	845.276	381.261	384.023	876.448	397.72	299.836	822.478	365.643
247	2.46	573.432	1312.29	204.083	612.072	1299.75	137.786	607.596	1297.7	274.282	688.117	1129.49	72.4382	720.715	1121.66	342.928	607.604	1073.28	210.724	562.148	828.965	-101.162	421.263	1007.73	54.586	469.79	1059.39	25.3318	398.329	1096.23	74.5508	384.254	1158.74	151.886	700.076	795.726	514.452	430.421	842.953	454.927	466.956	845.183	381.336	384.05	876.452	397.727	299.889	822.476	365.64
248	2.47	573.661	1312.36	204.002	612.303	1299.78	137.665	607.746	1297.82	274.204	688.379	1129.68	72.6569	720.613	1121.67	343.049	607.655	1073.3	210.755	558.567	830.986	-100.582	422.862	1011.62	57.1887	470.332	1062.86	26.8785	400.518	1100.41	76.9502	389.453	1163.83	153.852	700.076	795.668	514.437	430.445	842.942	454.932	466.919	845.16	381.331	384.074	876.454	397.741	299.964	822.446	365.643
249	2.48	573.771	1312.46	203.929	612.532	1299.77	137.547	607.838	1297.94	274.125	688.61	1129.86	72.8445	720.674	1121.63	343.031	607.721	1073.32	210.768	555.102	833.027	-100.041	424.206	1015.59	59.7486	471.192	1066.2	28.2091	402.831	1104.53	79.2162	394.613	1168.58	155.778	700.057	795.608	514.41	430.428	842.93	454.922	466.933	845.151	381.318	384.064	876.457	397.736	299.991	822.416	365.62
250	2.49	573.897	1312.54	203.863	612.71	1299.79	137.45	607.88	1298.07	274.032	688.785	1130.02	73.0421	720.88	1121.55	342.902	607.777	1073.59	210.826	551.601	835.02	-99.4812	425.589	1019.38	62.2119	472.382	1069.32	29.5617	405.095	1108.51	81.4821	398.877	1173.46	158.234	700.064	795.557	514.37	430.412	842.931	454.912	466.916	845.158	381.291	384.044	876.461	397.732	299.974	822.402	365.605
251	2.5	574.789	1312.41	203.608	612.806	1299.81	137.398	607.904	1298.19	273.936	688.982	1130.18	73.2308	720.91	1121.51	342.876	607.888	1074.07	210.992	548.247	837.125	-98.8549	426.898	1023.06	64.5754	473.345	1072.47	30.7377	408.023	1112.4	84.0769	403.403	1177.99	160.473	700.042	795.497	514.339	430.39	842.956	454.918	466.84	845.155	381.262	384.031	876.463	397.725	300.006	822.386	365.611
252	2.51	575.703	1312.25	203.303	612.853	1299.85	137.355	607.927	1298.32	273.83	689.205	1130.38	73.4212	720.945	1121.48	342.858				544.89	839.257	-98.2815	428.375	1026.57	66.9527	474.297	1075.56	31.9357	411.645	1116.29	87.0733	407.854	1182.12	162.637	700.041	795.457	514.31	430.391	842.971	454.922	466.786	845.17	381.24	384.033	876.457	397.715	299.962	822.401	365.633
253	2.52	574.435	1312.8	203.634	612.959	1299.87	137.271	607.95	1298.45	273.739	689.522	1130.67	73.6182	720.977	1121.45	342.879				541.631	841.27	-97.6885	429.832	1029.9	69.3444	475.374	1078.36	33.2243	414.354	1119.9	89.5721	412.35	1186.04	164.773	700.054	795.424	514.276	430.387	842.971	454.919	466.766	845.177	381.224	384.011	876.464	397.713	299.953	822.412	365.641
254	2.53	574.103	1313.03	203.669	613.001	1299.91	137.224	607.985	1298.56	273.673	689.734	1130.88	73.7216	721.04	1121.46	342.892				538.643	843.357	-97.0725	430.549	1033.41	71.8599	476.485	1081.1	34.5197	416.778	1123.3	91.9183	416.679	1189.85	166.819	700.057	795.379	514.229	430.397	842.961	454.894	466.805	845.164	381.254	384.005	876.475	397.725	299.889	822.457	365.617
255	2.54	574.181	1313.13	203.616	613.02	1299.99	137.206	608.034	1298.68	273.599	689.697	1130.83	73.6718	721.091	1121.45	342.891	603.668	1074.29	212.141	535.645	845.269	-96.4596	431.316	1036.81	74.4292	477.589	1083.7	35.8439	419.156	1126.55	94.2141	421.046	1193.25	168.72	700.065	795.345	514.189	430.408	842.963	454.885	466.838	845.154	381.28	384.013	876.47	397.732	299.88	822.506	365.63
256	2.55	574.424	1313.16	203.56	613.073	1300.04	137.181	608.115	1298.77	273.548	689.829	1130.9	73.7808	721.125	1121.42	342.894	604.33	1074.61	211.888	532.94	847.172	-96.0018	433.921	1039.4	76.278	478.828	1086.23	37.1227	421.668	1129.59	96.3345	425.208	1196.41	170.661	700.076	795.303	514.162	430.479	842.954	454.887	466.859	845.114	381.26	384.048	876.458	397.727	299.963	822.511	365.636
257	2.56	574.665	1313.2	203.501	613.138	1300.06	137.146	608.244	1298.84	273.486	689.979	1130.99	73.9253	721.196	1121.41	342.877	604.898	1074.84	211.641	530.152	849.219	-95.4613	435.728	1042.14	78.3111	480.045	1088.65	38.3125	424.194	1132.5	98.3312	429.32	1199.48	172.418	700.071	795.256	514.142	430.501	842.934	454.878	466.91	845.079	381.247	384.077	876.457	397.732	299.918	822.504	365.622
258	2.57	574.808	1313.25	203.445	613.192	1300.08	137.108	608.419	1298.91	273.447	690.099	1131.08	74.113	721.245	1121.38	342.871	605.783	1075.11	211.242	527.488	851.038	-94.8665	437.362	1044.81	80.2978	481.409	1090.9	39.5654	426.704	1135.29	100.362	433.936	1202.25	173.963	700.072	795.213	514.108	430.478	842.916	454.869	466.928	845.057	381.245	384.085	876.448	397.741	299.909	822.43	365.603
259	2.58	574.936	1313.28	203.447	613.257	1300.1	137.097	608.498	1299	273.442	690.187	1131.15	74.2803	721.273	1121.36	342.895	606.922	1075.16	210.706	525.018	852.726	-94.2389	438.907	1047.33	82.2534	482.509	1093.09	40.7241	429.214	1137.96	102.322	439.004	1204.9	175.321	700.07	795.154	514.082	430.472	842.895	454.894	466.879	845.066	381.243	384.086	876.429	397.766	300.013	822.352	365.596
260	2.59	575.163	1313.35	203.441	613.296	1300.14	137.114	608.603	1299.11	273.433	690.272	1131.2	74.3922	721.326	1121.36	342.896				522.423	854.618	-93.553	440.377	1049.78	84.1544	483.758	1095.12	41.9279	431.562	1140.55	104.284	442.64	1207.69	177.325	700.082	795.127	514.063	430.452	842.883	454.913	466.85	845.084	381.234	384.081	876.433	397.78	300.117	822.276	365.61
261	2.6	575.294	1313.45	203.433	613.339	1300.21	137.105	608.683	1299.21	273.414	690.495	1131.37	74.5934	721.348	1121.38	342.881				520.121	856.317	-92.9648	441.905	1052.19	85.9684	485.002	1097.04	43.0564	433.9	1143.01	106.246	446.713	1210.21	178.842	700.114	795.139	514.034	430.456	842.891	454.914	466.82	845.108	381.209	384.08	876.449	397.784	300.093	822.279	365.647
262	2.61	575.287	1313.61	203.445	613.351	1300.27	137.076	608.728	1299.31	273.416	690.806	1131.56	74.8907	721.396	1121.41	342.852				517.897	857.893	-92.3381	443.42	1054.42	87.7917	486.165	1098.95	44.1324	436.321	1145.26	107.971	450.718	1212.48	180.34	700.126	795.144	514.007	430.449	842.931	454.922	466.797	845.142	381.225	384.042	876.479	397.787	299.99	822.384	365.678
263	2.62	575.399	1313.71	203.442	613.326	1300.33	137.071	608.783	1299.4	273.431	691.226	1131.67	75.2697	721.347	1121.47	342.885				515.564	859.557	-91.5671	444.955	1056.58	89.5372	487.515	1100.72	45.1506	438.623	1147.45	109.641	454.824	1214.54	181.799	700.143	795.157	513.977	430.449	842.967	454.934	466.788	845.162	381.238	384.024	876.517	397.797	299.915	822.473	365.677
264	2.63	575.54	1313.8	203.427	613.347	1300.38	137.039	608.862	1299.46	273.409	691.284	1131.74	75.3999	720.961	1121.49	343.055				513.614	861.018	-90.9498	446.667	1058.59	91.2581	488.955	1102.31	46.1571	441.075	1149.63	111.227	459.497	1216.53	182.974	700.151	795.157	513.968	430.455	842.975	454.926	466.775	845.168	381.225	384.042	876.518	397.794	300.006	822.473	365.672
265	2.64	575.68	1313.88	203.421	613.406	1300.4	136.987	608.991	1299.49	273.391	690.677	1131.85	75.0275	720.898	1121.5	343.099				511.657	862.515	-90.4693	448.357	1060.44	92.8353	490.307	1103.96	47.1673	443.296	1151.59	112.734	464.17	1218.32	183.763	700.154	795.134	513.968	430.472	842.965	454.905	466.756	845.145	381.207	384.05	876.496	397.791	300.05	822.454	365.652
266	2.65	575.763	1313.92	203.426	613.394	1300.42	137.004	609.072	1299.51	273.389	690.571	1131.89	75.0293	720.859	1121.48	343.119	603.371	1074.35	212.489	509.738	863.971	-89.7197	450.181	1062.22	94.3207	491.565	1105.48	48.1875	445.483	1153.35	114.232	467.383	1220.11	185.297	700.192	795.107	513.964	430.471	842.943	454.892	466.787	845.103	381.207	384.054	876.47	397.773	299.928	822.461	365.643
267	2.66	575.788	1313.98	203.484	613.395	1300.4	137.03	609.18	1299.53	273.389	690.617	1131.92	75.1301	720.817	1121.44	343.148	603.941	1074.55	212.235	507.978	865.379	-89.0033	452.019	1063.91	95.6981	492.985	1106.82	49.2456	447.833	1155.13	115.686	471.259	1221.79	186.509	700.185	795.08	513.983	430.454	842.914	454.905	466.831	845.078	381.221	384.033	876.442	397.771	299.926	822.444	365.661
268	2.67	575.884	1314.01	203.467	613.389	1300.41	137.043	609.25	1299.55	273.38	690.839	1131.83	75.4612	720.781	1121.42	343.155	604.584	1074.67	211.939	506.326	866.632	-88.4354	453.926	1065.34	97.0777	494.333	1108.06	50.1552	450.105	1156.76	116.961	475.035	1223.35	187.51	700.147	795.056	514.008	430.444	842.906	454.909	466.833	845.058	381.224	384.024	876.417	397.779	299.938	822.435	365.648
269	2.68	575.937	1314.09	203.461	613.393	1300.44	137.038	609.265	1299.59	273.366	691.293	1131.63	76.0279	720.779	1121.42	343.16	604.904	1074.72	211.822	504.4	867.716	-87.8383	455.512	1066.85	98.4057	495.645	1109.31	51.0108	452.369	1158.34	118.233	478.691	1224.79	188.405	700.126	795.054	514.019	430.446	842.901	454.907	466.819	845.045	381.218	384.038	876.411	397.768	299.912	822.437	365.651
270	2.69	575.858	1314.17	203.491	613.402	1300.49	137.022	609.309	1299.65	273.374	691.45	1131.74	76.2185	720.764	1121.43	343.178	604.888	1074.81	211.814	502.288	868.643	-87.2135	457.075	1068.27	99.7118	496.848	1110.52	51.8755	455.462	1159.51	119.795	482.122	1226.13	189.406	700.111	795.067	514.026	430.432	842.906	454.901	466.856	845.067	381.241	384.022	876.435	397.77	300.012	822.432	365.651
271	2.7	575.895	1314.21	203.514	613.371	1300.55	137.056	609.346	1299.72	273.392	691.703	1131.92	76.4231	720.76	1121.44	343.212	604.849	1074.88	211.836	500.77	869.764	-86.5398	458.518	1069.71	101.036	498.088	1111.7	52.7033	459.468	1160.23	121.648	485.357	1227.25	190.457	700.085	795.076	514.049	430.413	842.925	454.902	466.87	845.117	381.269	384.033	876.468	397.79	300.002	822.427	365.656
272	2.71	575.971	1314.26	203.537	613.377	1300.61	137.091	609.445	1299.75	273.406	691.952	1132.1	76.6184	720.792	1121.45	343.225	604.955	1074.89	211.849	499.533	870.83	-85.9411	459.781	1071.08	102.264	499.394	1112.73	53.5041	461.973	1161.42	123	488.746	1228.28	191.174	700.058	795.088	514.078	430.407	842.939	454.913	466.813	845.167	381.274	384.036	876.497	397.799	299.949	822.434	365.664
273	2.72	576.014	1314.28	203.572	613.378	1300.64	137.132	609.493	1299.81	273.429	692.162	1132.26	76.7657	720.797	1121.46	343.228	605.039	1074.89	211.834	498.309	871.887	-85.3252	461.129	1072.23	103.42	500.693	1113.58	54.2507	464.451	1162.44	124.079	491.993	1229.34	191.773	700.036	795.102	514.101	430.404	842.932	454.925	466.76	845.183	381.252	384.019	876.504	397.784	299.946	822.401	365.662
274	2.73	576.036	1314.3	203.608	613.355	1300.66	137.155	609.532	1299.83	273.471	692.2	1132.32	76.8202	720.818	1121.46	343.249	605.055	1074.91	211.838	497.181	872.974	-84.7041	462.399	1073.36	104.567	501.976	1114.41	54.9687	466.641	1163.56	124.983	495.137	1230.31	192.525	700.007	795.125	514.134	430.411	842.919	454.914	466.745	845.181	381.219	384.027	876.504	397.77	300.072	822.36	365.639
275	2.74	576.065	1314.34	203.673	613.34	1300.64	137.173	609.568	1299.83	273.513	691.914	1132.33	76.701	720.794	1121.45	343.288	605.084	1074.9	211.874	496.101	873.988	-84.1017	463.695	1074.39	105.685	503.16	1115.19	55.7222	468.755	1164.45	126.046	497.926	1231.27	193.209	699.993	795.134	514.152	430.41	842.927	454.909	466.768	845.151	381.232	384.033	876.466	397.76	300.147	822.34	365.656
276	2.75	576.044	1314.36	203.773	613.317	1300.61	137.199	609.62	1299.81	273.558	691.407	1132.33	76.4639	720.765	1121.45	343.322	605.077	1074.89	211.9	495.121	874.78	-83.5091	465.001	1075.26	106.733	504.223	1115.9	56.4113	470.604	1165.31	127.006	500.825	1232.07	193.864	699.975	795.113	514.177	430.409	842.912	454.918	466.835	845.103	381.26	384.016	876.429	397.756	300.093	822.372	365.646
277	2.76	576.092	1314.38	203.822	613.341	1300.59	137.211	609.652	1299.79	273.588	691.338	1132.32	76.4921	720.721	1121.43	343.322	605.089	1074.88	211.882	494.126	875.467	-82.9422	466.271	1076.12	107.673	505.221	1116.55	56.9817	472.359	1166.22	127.942	503.595	1232.96	194.384	699.978	795.104	514.207	430.418	842.901	454.914	466.864	845.058	381.246	384.01	876.393	397.731	300.045	822.381	365.646
278	2.77	576.092	1314.46	203.851	613.388	1300.62	137.234	609.711	1299.8	273.627	691.41	1132.35	76.5918	720.689	1121.44	343.318	605.034	1074.9	211.855	492.714	876.225	-82.0367	467.608	1077.02	108.537	506.261	1117.22	57.5736	474.179	1166.99	128.881	506.249	1233.55	194.938	699.977	795.124	514.225	430.404	842.909	454.889	466.867	845.03	381.222	384.009	876.387	397.705	300.006	822.409	365.608
279	2.78	576.127	1314.52	203.893	613.354	1300.7	137.3	609.737	1299.84	273.692	691.503	1132.4	76.7215	720.69	1121.44	343.331	605.006	1074.93	211.862	490.955	877.107	-80.6284	468.893	1077.88	109.435	507.265	1117.88	58.2113	475.91	1167.79	129.776	508.999	1234.19	195.506	699.971	795.137	514.233	430.422	842.931	454.885	466.872	845.039	381.243	384.043	876.417	397.702	299.959	822.47	365.612
280	2.79	576.104	1314.6	203.975	613.243	1300.83	137.409	609.771	1299.92	273.762	691.544	1132.47	76.8882	720.655	1121.46	343.346	604.977	1074.95	211.88	489.932	877.939	-79.7841	470.095	1078.61	110.292	508.242	1118.53	58.8462	477.815	1168.54	130.638	511.735	1234.87	195.953	699.99	795.144	514.243	430.435	842.946	454.913	466.883	845.078	381.279	384.059	876.457	397.718	299.925	822.512	365.627
281	2.8	576.082	1314.66	204.047	613.178	1300.94	137.53	609.841	1299.99	273.858	691.645	1132.54	77.0537	720.635	1121.46	343.373	605.06	1074.93	211.885	489.091	878.63	-79.1303	471.343	1079.35	111.121	509.167	1119.11	59.44	479.6	1169.27	131.412	514.23	1235.32	196.598	699.988	795.163	514.275	430.421	842.935	454.93	466.865	845.129	381.291	384.073	876.493	397.733	299.971	822.443	365.615
282	2.81	576.167	1314.66	204.118	613.21	1301.03	137.611	609.915	1300.06	273.937	691.758	1132.6	77.1679	720.619	1121.46	343.382	605.153	1074.89	211.894	488.153	879.214	-78.4815	472.643	1080.04	111.913	510.179	1119.63	60.0446	481.272	1169.9	132.218	516.498	1235.7	197.238	699.946	795.162	514.299	430.394	842.938	454.927	466.819	845.174	381.274	384.049	876.515	397.744	300.063	822.361	365.605
283	2.82	576.028	1314.7	204.29	613.185	1301.07	137.684	609.981	1300.07	274.026	691.804	1132.62	77.2976	720.58	1121.45	343.394	605.161	1074.87	211.922	487.11	879.791	-77.771	473.733	1080.71	112.623	511.138	1120.1	60.617	482.934	1170.42	133.124	518.737	1235.98	197.861	699.905	795.147	514.319	430.366	842.924	454.927	466.792	845.195	381.274	384.007	876.516	397.754	300.021	822.345	365.59
284	2.83	575.894	1314.75	204.448	613.145	1301.05	137.751	610.007	1300.04	274.106	691.813	1132.63	77.4324	720.586	1121.43	343.451	605.181	1074.86	211.964	486.301	880.362	-77.1995	474.664	1081.23	113.326	511.968	1120.5	61.0752	484.393	1170.9	133.902	521.197	1236.2	198.386	699.864	795.135	514.33	430.343	842.93	454.943	466.782	845.19	381.281	383.998	876.49	397.754	299.995	822.325	365.615
285	2.84	575.869	1314.76	204.555	613.173	1300.96	137.8	610.033	1299.97	274.177	691.882	1132.62	77.4988	720.611	1121.44	343.479	605.229	1074.86	211.998	485.76	880.95	-76.7742	475.677	1081.59	114.076	512.748	1120.86	61.5054	485.96	1171.32	134.538	523.477	1236.32	198.615	699.877	795.136	514.352	430.333	842.941	454.943	466.811	845.151	381.264	384.001	876.456	397.729	300.024	822.343	365.644
286	2.85	575.779	1314.81	204.645	613.197	1300.91	137.824	610.055	1299.9	274.208	691.978	1132.61	77.5561	720.664	1121.43	343.488	605.177	1074.91	212.015	485.132	881.595	-76.3342	476.603	1082.08	114.797	513.609	1121.19	61.9905	487.539	1171.77	135.156	525.412	1236.58	198.859	699.905	795.141	514.353	430.355	842.938	454.925	466.819	845.092	381.232	383.991	876.428	397.689	300.102	822.351	365.629
287	2.86	575.665	1314.87	204.735	613.22	1300.92	137.861	610.1	1299.86	274.258	692.015	1132.61	77.6408	720.712	1121.43	343.498	605.113	1074.95	212.031	484.348	882.262	-75.8182	477.413	1082.69	115.469	514.467	1121.55	62.5175	488.937	1172.27	135.733	528.164	1236.79	199.233	699.924	795.116	514.346	430.379	842.943	454.901	466.838	845.046	381.222	384.02	876.432	397.666	300.066	822.396	365.595
288	2.87	575.638	1314.93	204.831	613.204	1301	137.933	610.157	1299.9	274.322	692.051	1132.65	77.7613	720.693	1121.41	343.506	605.153	1074.97	212.027	483.57	882.882	-75.2831	478.174	1083.38	116.083	515.244	1121.97	63.0226	490.151	1172.79	136.25	531.574	1236.85	199.441	699.903	795.087	514.346	430.4	842.939	454.901	466.865	845.051	381.24	384.042	876.443	397.681	299.971	822.472	365.598
289	2.88	575.648	1314.99	204.924	613.23	1301.12	138.027	610.243	1299.94	274.416	692.131	1132.73	77.8798	720.723	1121.4	343.504	605.265	1074.96	212.034	482.696	883.451	-74.616	478.916	1084	116.692	515.891	1122.4	63.4517	491.383	1173.26	136.781	533.167	1237.47	199.594	699.915	795.07	514.363	430.427	842.937	454.918	466.884	845.055	381.264	384.063	876.457	397.7	300.024	822.483	365.627
290	2.89	575.674	1315.01	204.993	613.245	1301.22	138.138	610.298	1300	274.497	692.214	1132.81	77.9676	720.789	1121.38	343.532	605.319	1074.93	212.055	482.011	883.925	-73.961	479.67	1084.47	117.304	516.449	1122.83	63.772	492.603	1173.7	137.287	534.199	1238.19	199.849	699.907	795.028	514.372	430.429	842.93	454.91	466.935	845.073	381.301	384.087	876.484	397.7	300.005	822.438	365.615
291	2.9	575.679	1315.05	205.066	613.253	1301.27	138.216	610.339	1300.04	274.608	692.265	1132.87	78.0595	720.746	1121.35	343.57	605.303	1074.92	212.091	481.569	884.316	-73.4441	480.306	1084.99	117.905	516.966	1123.22	64.0415	493.635	1174.31	137.712	535.547	1238.66	200.082	699.852	794.951	514.361	430.405	842.926	454.914	466.926	845.094	381.327	384.077	876.511	397.721	299.948	822.411	365.622
292	2.91	575.688	1315.05	205.169	613.264	1301.29	138.272	610.349	1300.07	274.684	692.299	1132.95	78.1573	720.719	1121.31	343.61	605.293	1074.92	212.123	481.093	884.702	-72.9216	480.829	1085.55	118.411	517.461	1123.56	64.3596	494.397	1174.89	138.043	537.037	1238.98	200.229	699.804	794.882	514.358	430.364	842.918	454.919	466.906	845.102	381.324	384.056	876.513	397.736	299.983	822.419	365.646
293	2.92	575.601	1315.11	205.282	613.302	1301.31	138.333	610.4	1300.07	274.734	692.347	1132.99	78.23	720.754	1121.29	343.621	605.313	1074.92	212.142	480.468	885.123	-72.3125	481.324	1086.15	118.871	518.026	1123.89	64.6974	495.084	1175.36	138.301	538.316	1239.3	200.344	699.798	794.832	514.328	430.352	842.918	454.931	466.842	845.107	381.3	384.06	876.482	397.746	299.982	822.403	365.635
294	2.93	575.668	1315.14	205.341	613.285	1301.34	138.405	610.43	1300.05	274.753	692.368	1133	78.2757	720.746	1121.27	343.622	605.34	1074.89	212.169	479.88	885.502	-71.7425	481.806	1086.64	119.227	518.541	1124.17	64.9872	495.824	1175.75	138.523	539.223	1239.86	200.369	699.818	794.791	514.298	430.343	842.921	454.926	466.82	845.097	381.265	384.036	876.461	397.733	299.921	822.42	365.644
295	2.94	575.695	1315.18	205.404	613.304	1301.35	138.429	610.449	1300.03	274.799	692.348	1133	78.3062	720.742	1121.25	343.629	605.325	1074.92	212.204	479.395	885.852	-71.2302	482.338	1087	119.569	519.003	1124.47	65.2618	496.625	1176.09	138.759	539.899	1240.55	200.408	699.851	794.754	514.264	430.351	842.917	454.913	466.828	845.088	381.249	384.004	876.451	397.72	299.874	822.458	365.662
296	2.95	575.726	1315.24	205.487	613.371	1301.38	138.48	610.516	1300.06	274.869	692.327	1133.03	78.356	720.749	1121.25	343.657	605.377	1074.91	212.242	478.846	886.21	-70.6314	482.766	1087.39	119.929	519.381	1124.77	65.5082	497.389	1176.45	139.017	540.461	1241.07	200.526	699.868	794.712	514.227	430.375	842.921	454.931	466.829	845.067	381.245	384.014	876.449	397.736	299.906	822.486	365.662
297	2.96	575.817	1315.26	205.579	613.413	1301.44	138.586	610.545	1300.11	274.952	692.341	1133.09	78.421	720.822	1121.25	343.664	605.484	1074.87	212.271	478.361	886.473	-70.0193	483.085	1087.76	120.287	519.692	1125.06	65.744	498.053	1176.83	139.31	540.835	1241.49	200.727	699.917	794.652	514.188	430.423	842.932	454.944	466.844	845.051	381.256	384.032	876.454	397.748	299.959	822.469	365.654
298	2.97	575.855	1315.31	205.677	613.378	1301.5	138.703	610.61	1300.15	275.039	692.35	1133.13	78.4926	720.843	1121.22	343.662	605.483	1074.88	212.281	478.058	886.653	-69.609	483.371	1088.09	120.636	519.909	1125.33	65.9554	498.599	1177.2	139.611	541.175	1241.84	200.932	699.902	794.592	514.168	430.449	842.92	454.949	466.866	845.052	381.273	384.042	876.46	397.746	299.937	822.458	365.635
299	2.98	575.858	1315.34	205.798	613.392	1301.56	138.786	610.677	1300.22	275.162	692.348	1133.16	78.5416	720.813	1121.2	343.678	605.459	1074.87	212.313	477.829	886.786	-69.2891	483.622	1088.4	121.012	520.068	1125.57	66.1699	499.109	1177.51	139.926	541.944	1241.97	201.211	699.852	794.531	514.157	430.432	842.902	454.933	466.882	845.059	381.278	384.047	876.472	397.735	299.96	822.452	365.623
[truncated: 871 more rows]

## Sheet: Trial02
PathFileType	4	(X/Y/Z)	Trial02.trc
DataRate	CameraRate	NumFrames	NumMarkers	Units	OrigDataRate	OrigDataStartFrame	OrigNumFrames
100	100	1302	16	mm	100	1	1302
Frame#	Time	nasion			r zyg pr			l zyg pr			r should			l should			sternum			r elbow			r ulna			r radius			r hand			r finger			l elbow			l ulna			l radius			l hand			l finger
[truncated: 1,303 more rows]

## Sheet: Trial03
PathFileType	4	(X/Y/Z)	Trial03.trc
[truncated: 1,321 more rows]
[truncated: 3 more columns]

## Sheet: Trial04
PathFileType	4	(X/Y/Z)	Trial04.trc
[truncated: 1,109 more rows]
[truncated: 3 more columns]
