# Supplementary material for: Upper-Limb Kinematic Variables are correlated with Fugl-Meyer Assessment Sub Scales During a Hand-to-Mouth Functional Task in Post-Stroke Individuals
Source: Research Square preprint supplement (doi:10.21203/rs.3.rs-8270137/v1), 2025-12-16
Supplement: Supplementary file 37 [file Additional file 8.xls]

## Sheet: Static
PathFileType	4	(X/Y/Z)	Static.trc
DataRate	CameraRate	NumFrames	NumMarkers	Units	OrigDataRate	OrigDataStartFrame	OrigNumFrames
100	100	699	17	mm	100	1	699
Frame#	Time	nasion			r zyg pr			l zyg pr			r should			l should			sternum			r elbow			r ulna			r radius			r hand			r finger			l elbow			l ulna			l radius			l hand			l finger
		X1	Y1	Z1	X2	Y2	Z2	X3	Y3	Z3	X4	Y4	Z4	X5	Y5	Z5	X6	Y6	Z6	X7	Y7	Z7	X8	Y8	Z8	X9	Y9	Z9	X10	Y10	Z10	X11	Y11	Z11	X12	Y12	Z12	X13	Y13	Z13	X14	Y14	Z14	X15	Y15	Z15	X16	Y16	Z16
1	0	798.507	1116.03	300.28	847.362	1111.09	243.322	821.461	1113.67	370.912	877.892	972.236	200.702	883.756	979.841	460.982	821.99	934.014	327.631	803.533	696.466	66.4357	604.971	732.524	140.389	647.239	758.632	206.048	579.176	782.03	213.743	523.992	731.735	286.646	852.804	708.801	591.705	634.625	735.675	585.548	645.781	749.13	505.134	565.44	766.203	536.091	483.08	740.012	516.699
2	0.01	798.597	1116.01	300.192	847.376	1111.08	243.249	821.474	1113.7	370.898	877.885	972.201	200.69	883.779	979.879	460.969	822.054	934.018	327.603	803.538	696.422	66.4335	604.283	732.767	140.788	647.201	758.687	206.069	579.169	782.071	213.696	524.07	731.703	286.571	852.796	708.826	591.751	634.628	735.654	585.53	645.743	749.155	505.123	565.404	766.207	536.046	483.132	739.966	516.675
3	0.02	798.64	1115.99	300.127	847.386	1111.05	243.204	821.501	1113.7	370.853	877.886	972.15	200.672	883.78	979.889	460.939	822.093	933.995	327.588	803.537	696.38	66.4265	604.159	732.828	140.841	647.169	758.738	206.089	579.194	782.067	213.674	524.101	731.67	286.549	852.786	708.823	591.735	634.608	735.648	585.522	645.751	749.158	505.081	565.397	766.195	536.006	483.149	739.931	516.66
4	0.03	798.645	1116	300.083	847.35	1111.03	243.19	821.477	1113.72	370.825	877.862	972.143	200.679	883.753	979.908	460.936	822.069	933.986	327.589	803.514	696.351	66.4464	604.132	732.832	140.837	647.148	758.747	206.105	579.144	782.075	213.691	524.041	731.705	286.542	852.783	708.839	591.724	634.625	735.634	585.526	645.749	749.165	505.063	565.389	766.202	535.991	483.134	739.937	516.645
5	0.04	798.608	1116.01	300.058	847.346	1111	243.166	821.451	1113.74	370.801	877.777	972.096	200.701	883.737	979.915	460.941	822.077	933.963	327.566	803.484	696.302	66.4436	604.125	732.819	140.819	647.175	758.733	206.083	579.094	782.075	213.704	524.053	731.704	286.544	852.787	708.841	591.738	634.61	735.626	585.512	645.697	749.179	505.08	565.302	766.206	535.984	483.109	739.944	516.644
6	0.05	798.694	1115.95	299.993	847.405	1110.97	243.1	821.438	1113.72	370.742	877.761	972.039	200.689	883.725	979.902	460.906	822.132	933.924	327.535	803.469	696.25	66.4257	604.183	732.797	140.747	647.213	758.697	206.051	579.127	782.044	213.659	524.081	731.663	286.512	852.781	708.833	591.749	634.584	735.62	585.488	645.691	749.161	505.051	565.281	766.181	535.957	483.057	739.94	516.65
7	0.06	798.713	1115.91	299.941	847.436	1110.93	243.034	821.442	1113.69	370.676	877.786	972	200.647	883.773	979.874	460.845	822.203	933.871	327.497	803.472	696.185	66.3965	604.283	732.752	140.665	647.232	758.657	206.021	579.174	782.009	213.622	524.084	731.643	286.467	852.784	708.837	591.738	634.592	735.622	585.462	645.659	749.141	505.005	565.302	766.172	535.94	483.049	739.921	516.62
8	0.07	798.692	1115.89	299.9	847.435	1110.9	243.021	821.426	1113.67	370.631	877.829	971.987	200.611	883.765	979.858	460.808	822.241	933.812	327.469	803.468	696.139	66.3882	604.274	732.76	140.659	647.205	758.629	206.018	579.204	782.015	213.616	524.083	731.657	286.48	852.788	708.843	591.749	634.598	735.622	585.475	645.64	749.12	504.99	565.321	766.19	535.939	483.064	739.918	516.609
9	0.08	798.748	1115.86	299.865	847.458	1110.89	243.001	821.422	1113.65	370.6	877.868	971.971	200.594	883.764	979.83	460.793	822.302	933.792	327.453	803.449	696.107	66.3916	604.489	732.693	140.524	647.183	758.608	206.011	579.201	782.024	213.617	524.121	731.647	286.492	852.779	708.852	591.782	634.603	735.612	585.489	645.619	749.124	504.998	565.31	766.215	535.953	483.091	739.917	516.629
10	0.09	798.737	1115.84	299.832	847.465	1110.89	242.962	821.43	1113.64	370.556	877.896	971.96	200.586	883.789	979.802	460.763	822.35	933.763	327.42	803.456	696.087	66.3639	604.808	732.599	140.313	647.178	758.617	206.016	579.217	782.011	213.616	524.085	731.684	286.461	852.764	708.838	591.788	634.626	735.602	585.469	645.686	749.097	504.977	565.368	766.205	535.921	483.09	739.937	516.611
11	0.1	798.795	1115.82	299.773	847.465	1110.93	242.917	821.437	1113.63	370.51	877.935	971.956	200.554	883.803	979.798	460.726	822.352	933.749	327.362	803.463	696.076	66.3516	604.702	732.668	140.384	647.209	758.632	206.014	579.255	782.014	213.588	524.088	731.696	286.425	852.791	708.818	591.771	634.636	735.604	585.436	645.724	749.075	504.959	565.412	766.179	535.89	483.077	739.935	516.575
12	0.11	798.748	1115.87	299.745	847.463	1110.94	242.916	821.41	1113.65	370.491	877.933	971.944	200.509	883.786	979.811	460.711	822.299	933.788	327.33	803.473	696.1	66.362	604.861	732.615	140.238	647.207	758.683	206.023	579.24	782.052	213.583	524.061	731.737	286.424	852.792	708.813	591.776	634.668	735.615	585.417	645.699	749.12	504.958	565.391	766.175	535.867	483.082	739.921	516.556
13	0.12	798.667	1115.94	299.746	847.476	1110.94	242.914	821.366	1113.68	370.478	877.899	971.93	200.514	883.716	979.817	460.701	822.247	933.816	327.295	803.479	696.128	66.3656	604.564	732.718	140.359	647.156	758.751	206.066	579.2	782.093	213.591	523.967	731.786	286.452	852.775	708.82	591.796	634.656	735.618	585.421	645.656	749.161	504.957	565.378	766.183	535.855	483.119	739.911	516.557
14	0.13	798.668	1115.96	299.712	847.476	1110.97	242.91	821.333	1113.68	370.455	877.855	971.919	200.534	883.68	979.822	460.679	822.247	933.826	327.254	803.47	696.14	66.3487	604.507	732.732	140.376	647.134	758.761	206.081	579.192	782.123	213.584	523.935	731.803	286.476	852.78	708.819	591.797	634.634	735.612	585.394	645.592	749.18	504.943	565.394	766.173	535.826	483.137	739.91	516.517
15	0.14	798.665	1115.94	299.682	847.482	1110.98	242.919	821.319	1113.67	370.429	877.839	971.913	200.503	883.666	979.797	460.64	822.272	933.798	327.217	803.446	696.106	66.3263	604.46	732.724	140.38	647.15	758.759	206.062	579.208	782.105	213.567	523.967	731.787	286.434	852.769	708.807	591.773	634.63	735.61	585.374	645.574	749.169	504.92	565.392	766.153	535.796	483.125	739.926	516.515
16	0.15	798.698	1115.89	299.691	847.483	1110.96	242.926	821.306	1113.64	370.429	877.855	971.911	200.488	883.649	979.743	460.602	822.367	933.699	327.16	803.421	696.072	66.2911	604.416	732.733	140.421	647.187	758.695	206.011	579.241	782.074	213.559	524.064	731.74	286.389	852.765	708.802	591.743	634.647	735.61	585.373	645.629	749.116	504.888	565.375	766.169	535.809	483.095	739.916	516.546
17	0.16	798.79	1115.83	299.694	847.431	1110.97	242.942	821.322	1113.6	370.432	877.853	971.898	200.468	883.652	979.694	460.568	822.456	933.624	327.13	803.396	696.037	66.2512	604.393	732.739	140.422	647.193	758.645	205.97	579.291	782.045	213.503	524.154	731.678	286.385	852.801	708.788	591.728	634.659	735.627	585.369	645.653	749.095	504.867	565.412	766.185	535.807	483.095	739.925	516.515
18	0.17	798.74	1115.81	299.716	847.395	1110.96	242.954	821.345	1113.59	370.443	877.875	971.883	200.448	883.643	979.67	460.556	822.434	933.598	327.12	803.351	696.01	66.2173	604.43	732.729	140.381	647.2	758.614	205.942	579.293	782.025	213.48	524.114	731.683	286.368	852.797	708.767	591.7	634.67	735.633	585.356	645.623	749.062	504.85	565.447	766.183	535.789	483.124	739.917	516.498
19	0.18	798.732	1115.81	299.735	847.395	1110.95	242.951	821.333	1113.58	370.487	877.895	971.878	200.446	883.601	979.657	460.551	822.428	933.591	327.133	803.326	696.001	66.201	604.436	732.711	140.355	647.191	758.604	205.932	579.293	782.013	213.502	524.082	731.709	286.368	852.772	708.728	591.682	634.635	735.638	585.355	645.61	749.046	504.827	565.415	766.174	535.781	483.104	739.907	516.506
20	0.19	798.684	1115.87	299.792	847.388	1110.96	242.957	821.336	1113.59	370.547	877.872	971.868	200.465	883.597	979.662	460.561	822.437	933.593	327.167	803.345	696.023	66.2059	604.406	732.719	140.37	647.211	758.639	205.919	579.278	782.032	213.521	524.036	731.741	286.395	852.758	708.689	591.672	634.636	735.631	585.38	645.627	749.06	504.856	565.409	766.171	535.81	483.118	739.883	516.504
21	0.2	798.602	1115.9	299.854	847.336	1110.97	242.984	821.353	1113.62	370.608	877.853	971.86	200.477	883.575	979.677	460.591	822.457	933.585	327.194	803.356	696.053	66.2248	604.402	732.719	140.45	647.22	758.686	205.949	579.27	782.058	213.554	523.999	731.769	286.429	852.75	708.684	591.665	634.618	735.61	585.409	645.627	749.085	504.877	565.413	766.175	535.821	483.162	739.873	516.503
22	0.21	798.539	1115.92	299.896	847.299	1110.96	243.033	821.339	1113.64	370.642	877.82	971.847	200.491	883.532	979.679	460.605	822.44	933.593	327.184	803.344	696.071	66.2193	604.433	732.714	140.441	647.188	758.712	205.989	579.271	782.07	213.544	523.927	731.815	286.459	852.77	708.68	591.652	634.621	735.603	585.389	645.617	749.111	504.866	565.352	766.172	535.823	483.096	739.88	516.497
23	0.22	798.54	1115.91	299.909	847.287	1110.96	243.052	821.307	1113.63	370.655	877.794	971.823	200.502	883.511	979.663	460.593	822.446	933.579	327.157	803.354	696.052	66.2202	604.496	732.689	140.381	647.196	758.717	205.971	579.281	782.065	213.52	523.957	731.805	286.436	852.769	708.65	591.647	634.635	735.6	585.37	645.626	749.106	504.863	565.349	766.154	535.812	483.032	739.897	516.506
24	0.23	798.567	1115.88	299.923	847.252	1110.98	243.064	821.291	1113.62	370.689	877.786	971.802	200.516	883.515	979.644	460.592	822.433	933.546	327.158	803.383	696.037	66.2221	604.49	732.656	140.382	647.217	758.709	205.961	579.306	782.057	213.512	524	731.76	286.416	852.778	708.649	591.651	634.668	735.597	585.395	645.635	749.088	504.861	565.361	766.174	535.825	482.99	739.913	516.538
25	0.24	798.562	1115.87	299.984	847.233	1110.96	243.089	821.288	1113.59	370.723	877.789	971.814	200.519	883.489	979.627	460.614	822.434	933.521	327.192	803.357	696.018	66.2278	604.433	732.67	140.43	647.21	758.692	205.979	579.289	782.056	213.533	524.056	731.737	286.419	852.77	708.632	591.657	634.64	735.608	585.404	645.624	749.103	504.873	565.378	766.195	535.835	483.021	739.905	516.573
26	0.25	798.525	1115.85	300.017	847.21	1110.96	243.092	821.275	1113.57	370.736	877.747	971.799	200.537	883.425	979.593	460.62	822.467	933.482	327.167	803.301	695.977	66.2131	604.496	732.671	140.402	647.224	758.66	205.953	579.298	782.035	213.522	524.116	731.711	286.418	852.724	708.603	591.671	634.611	735.599	585.406	645.63	749.096	504.887	565.366	766.184	535.826	483.048	739.908	516.562
27	0.26	798.505	1115.82	300.019	847.215	1110.95	243.079	821.239	1113.54	370.73	877.71	971.771	200.524	883.413	979.569	460.591	822.537	933.416	327.136	803.302	695.923	66.1922	604.517	732.655	140.353	647.205	758.62	205.942	579.33	781.996	213.484	524.157	731.679	286.386	852.714	708.609	591.689	634.605	735.598	585.416	645.636	749.052	504.863	565.319	766.17	535.825	483.047	739.911	516.558
28	0.27	798.494	1115.8	300.007	847.195	1110.95	243.076	821.226	1113.52	370.724	877.695	971.785	200.523	883.412	979.553	460.579	822.53	933.394	327.142	803.304	695.893	66.1946	604.503	732.683	140.354	647.197	758.604	205.942	579.306	781.991	213.493	524.152	731.66	286.373	852.73	708.631	591.704	634.598	735.604	585.396	645.608	749.044	504.822	565.37	766.171	535.815	483.032	739.91	516.519
29	0.28	798.502	1115.81	300.006	847.214	1110.97	243.087	821.228	1113.54	370.742	877.711	971.778	200.51	883.373	979.547	460.595	822.514	933.405	327.128	803.304	695.906	66.2004	604.517	732.706	140.344	647.188	758.614	205.942	579.297	782.016	213.493	524.184	731.651	286.366	852.673	708.609	591.716	634.636	735.601	585.388	645.611	749.058	504.827	565.382	766.181	535.813	483.038	739.906	516.501
30	0.29	798.494	1115.84	300.022	847.179	1110.99	243.105	821.251	1113.57	370.758	877.694	971.774	200.538	883.357	979.561	460.603	822.481	933.446	327.122	803.3	695.927	66.2152	604.535	732.702	140.324	647.196	758.649	205.952	579.298	782.036	213.473	524.114	731.692	286.378	852.682	708.632	591.748	634.653	735.598	585.404	645.586	749.076	504.836	565.392	766.174	535.79	483.07	739.89	516.501
31	0.3	798.48	1115.87	300.038	847.187	1111	243.111	821.26	1113.59	370.768	877.725	971.771	200.571	883.332	979.576	460.613	822.466	933.463	327.129	803.351	695.962	66.2348	604.513	732.695	140.3	647.212	758.68	205.984	579.281	782.063	213.484	524.061	731.722	286.378	852.716	708.664	591.764	634.626	735.587	585.402	645.636	749.105	504.843	565.372	766.19	535.771	483.072	739.888	516.501
32	0.31	798.468	1115.92	300.071	847.198	1111.02	243.13	821.294	1113.62	370.797	877.703	971.761	200.608	883.349	979.598	460.639	822.508	933.462	327.161	803.39	695.975	66.2635	604.506	732.739	140.324	647.228	758.701	205.992	579.258	782.086	213.53	524.127	731.707	286.36	852.711	708.656	591.763	634.635	735.614	585.394	645.667	749.125	504.861	565.393	766.196	535.771	483.131	739.885	516.487
33	0.32	798.414	1115.98	300.103	847.175	1111.03	243.165	821.304	1113.64	370.831	877.712	971.755	200.621	883.359	979.618	460.661	822.499	933.485	327.182	803.412	695.973	66.2984	604.493	732.758	140.37	647.192	758.741	206.032	579.255	782.097	213.543	524.08	731.774	286.385	852.666	708.657	591.776	634.63	735.628	585.403	645.651	749.142	504.898	565.389	766.197	535.799	483.153	739.891	516.5
34	0.33	798.471	1115.96	300.114	847.234	1111.03	243.175	821.325	1113.64	370.851	877.741	971.741	200.616	883.36	979.615	460.674	822.52	933.465	327.204	803.418	695.957	66.3064	604.532	732.759	140.365	647.184	758.715	206.056	579.269	782.086	213.539	524.038	731.782	286.402	852.655	708.668	591.8	634.617	735.625	585.399	645.644	749.134	504.897	565.362	766.192	535.815	483.059	739.92	516.507
35	0.34	798.539	1115.93	300.116	847.27	1111.01	243.179	821.381	1113.62	370.853	877.785	971.722	200.615	883.353	979.591	460.653	822.633	933.402	327.196	803.399	695.906	66.3012	604.534	732.758	140.343	647.227	758.656	206.017	579.312	782.052	213.521	524.144	731.719	286.375	852.652	708.673	591.802	634.628	735.615	585.401	645.661	749.112	504.898	565.368	766.182	535.794	483.065	739.914	516.506
36	0.35	798.625	1115.89	300.126	847.301	1111	243.176	821.453	1113.61	370.873	877.801	971.692	200.604	883.394	979.572	460.648	822.731	933.341	327.189	803.393	695.866	66.2942	604.491	732.751	140.384	647.281	758.621	205.964	579.34	782.028	213.503	524.154	731.688	286.361	852.66	708.672	591.804	634.637	735.622	585.409	645.637	749.067	504.875	565.358	766.187	535.81	483.071	739.902	516.53
37	0.36	798.651	1115.88	300.193	847.337	1111	243.201	821.474	1113.61	370.9	877.765	971.66	200.627	883.416	979.558	460.662	822.797	933.305	327.2	803.429	695.846	66.299	604.476	732.735	140.427	647.268	758.595	205.983	579.347	782.011	213.54	524.1	731.713	286.385	852.67	708.674	591.812	634.659	735.583	585.426	645.638	749.044	504.877	565.364	766.181	535.827	483.08	739.909	516.544
38	0.37	798.68	1115.89	300.221	847.358	1110.99	243.22	821.504	1113.62	370.92	877.75	971.644	200.648	883.424	979.549	460.661	822.803	933.291	327.214	803.446	695.834	66.3164	604.659	732.667	140.311	647.245	758.605	206.016	579.322	782.018	213.558	524.071	731.702	286.404	852.669	708.655	591.813	634.68	735.563	585.404	645.634	749.054	504.897	565.34	766.163	535.838	483.121	739.874	516.528
39	0.38	798.655	1115.92	300.226	847.383	1110.97	243.226	821.524	1113.63	370.926	877.751	971.646	200.632	883.445	979.542	460.649	822.826	933.273	327.215	803.433	695.816	66.3131	604.878	732.573	140.147	647.24	758.621	206.013	579.3	782.032	213.55	524.097	731.686	286.394	852.664	708.645	591.806	634.637	735.566	585.385	645.649	749.063	504.906	565.361	766.151	535.82	483.112	739.851	516.498
40	0.39	798.664	1115.96	300.256	847.437	1110.96	243.245	821.552	1113.65	370.943	877.762	971.642	200.633	883.445	979.553	460.658	822.837	933.28	327.243	803.438	695.811	66.3155	604.553	732.676	140.375	647.25	758.624	206.008	579.317	782.031	213.55	524.101	731.706	286.4	852.656	708.64	591.814	634.62	735.579	585.396	645.622	749.085	504.92	565.355	766.166	535.821	483.065	739.859	516.526
41	0.4	798.712	1115.98	300.278	847.496	1110.95	243.264	821.588	1113.67	370.968	877.751	971.638	200.661	883.45	979.574	460.668	822.837	933.298	327.26	803.425	695.791	66.3441	604.545	732.7	140.399	647.247	758.626	206.025	579.357	782.009	213.579	524.114	731.708	286.41	852.653	708.635	591.819	634.653	735.587	585.413	645.601	749.11	504.938	565.348	766.182	535.847	483.061	739.903	516.56
42	0.41	798.766	1116	300.264	847.511	1110.97	243.267	821.626	1113.69	370.976	877.796	971.622	200.639	883.451	979.577	460.655	822.901	933.304	327.24	803.418	695.772	66.3384	604.578	732.716	140.394	647.25	758.603	206.029	579.349	782.01	213.603	524.084	731.738	286.416	852.656	708.622	591.819	634.684	735.6	585.415	645.61	749.109	504.916	565.342	766.183	535.834	483.09	739.9	516.561
43	0.42	798.765	1116.03	300.238	847.529	1111.01	243.237	821.657	1113.71	370.957	877.836	971.62	200.601	883.476	979.569	460.618	822.933	933.31	327.182	803.397	695.768	66.3086	604.502	732.756	140.407	647.25	758.615	205.993	579.299	782.051	213.572	524.094	731.738	286.397	852.672	708.649	591.802	634.65	735.616	585.383	645.596	749.106	504.89	565.363	766.192	535.826	483.093	739.93	516.561
44	0.43	798.782	1116.06	300.209	847.544	1111.03	243.235	821.677	1113.72	370.941	877.81	971.618	200.581	883.479	979.563	460.58	822.992	933.299	327.139	803.388	695.768	66.291	604.498	732.78	140.391	647.242	758.626	205.963	579.26	782.06	213.569	524.087	731.755	286.363	852.714	708.673	591.796	634.647	735.625	585.384	645.595	749.099	504.89	565.359	766.203	535.82	483.132	739.925	516.533
45	0.44	798.837	1116.1	300.206	847.554	1111.05	243.258	821.71	1113.72	370.948	877.808	971.612	200.583	883.481	979.565	460.565	823.045	933.315	327.132	803.402	695.775	66.2942	604.638	732.741	140.283	647.245	758.654	205.997	579.293	782.078	213.555	524.078	731.775	286.376	852.728	708.677	591.805	634.67	735.617	585.404	645.615	749.109	504.9	565.382	766.201	535.824	483.119	739.893	516.527
46	0.45	798.885	1116.1	300.228	847.57	1111.07	243.268	821.727	1113.73	370.957	877.842	971.601	200.582	883.487	979.556	460.545	823.061	933.329	327.135	803.413	695.78	66.2958	604.879	732.659	140.137	647.243	758.685	206.038	579.292	782.082	213.579	524.028	731.789	286.412	852.725	708.665	591.811	634.664	735.61	585.419	645.643	749.122	504.911	565.412	766.174	535.807	483.09	739.893	516.518
47	0.46	798.855	1116.09	300.247	847.575	1111.07	243.265	821.747	1113.71	370.952	877.855	971.601	200.575	883.479	979.552	460.533	823.098	933.322	327.111	803.409	695.786	66.2872	604.741	732.654	140.2	647.231	758.673	206.03	579.314	782.068	213.57	523.976	731.801	286.42	852.707	708.657	591.803	634.656	735.615	585.439	645.652	749.108	504.896	565.399	766.179	535.817	483.077	739.915	516.504
48	0.47	798.912	1116.06	300.22	847.581	1111.05	243.252	821.768	1113.7	370.961	877.842	971.594	200.583	883.505	979.543	460.53	823.174	933.279	327.092	803.411	695.763	66.2802	604.818	732.593	140.14	647.218	758.641	206.012	579.313	782.048	213.558	524.032	731.757	286.412	852.694	708.659	591.805	634.619	735.608	585.438	645.67	749.079	504.887	565.383	766.165	535.834	483.059	739.921	516.532
49	0.48	798.988	1116.03	300.21	847.596	1111.04	243.254	821.789	1113.7	370.97	877.868	971.585	200.572	883.544	979.52	460.524	823.232	933.241	327.092	803.418	695.756	66.2742	604.493	732.673	140.384	647.249	758.633	205.999	579.329	782.029	213.564	524.092	731.732	286.403	852.723	708.669	591.797	634.655	735.584	585.423	645.695	749.065	504.9	565.397	766.168	535.848	483.078	739.902	516.556
50	0.49	799.017	1116.03	300.218	847.595	1111.03	243.252	821.818	1113.69	370.962	877.868	971.56	200.556	883.561	979.505	460.507	823.272	933.244	327.075	803.411	695.745	66.2645	604.411	732.712	140.431	647.251	758.633	205.997	579.342	782.022	213.562	524.108	731.741	286.418	852.732	708.67	591.783	634.666	735.591	585.424	645.67	749.072	504.913	565.413	766.183	535.837	483.092	739.901	516.546
51	0.5	799.004	1116.03	300.231	847.574	1111.03	243.246	821.819	1113.7	370.949	877.873	971.554	200.539	883.533	979.496	460.513	823.297	933.269	327.038	803.391	695.734	66.253	604.357	732.741	140.448	647.228	758.643	205.973	579.317	782.04	213.561	524.089	731.761	286.416	852.736	708.67	591.769	634.637	735.601	585.42	645.654	749.082	504.904	565.391	766.187	535.842	483.075	739.901	516.549
52	0.51	798.955	1116.05	300.225	847.575	1111.03	243.231	821.817	1113.71	370.943	877.91	971.583	200.532	883.523	979.498	460.511	823.32	933.305	327.028	803.389	695.732	66.2574	604.323	732.754	140.524	647.242	758.661	205.949	579.316	782.038	213.554	524.061	731.776	286.416	852.752	708.671	591.746	634.655	735.612	585.442	645.621	749.099	504.895	565.341	766.197	535.874	483.077	739.883	516.571
53	0.52	798.904	1116.07	300.261	847.57	1111.03	243.25	821.825	1113.73	370.968	877.947	971.59	200.539	883.546	979.515	460.524	823.293	933.343	327.054	803.41	695.721	66.2805	604.313	732.757	140.581	647.25	758.678	205.951	579.329	782.038	213.577	524.039	731.806	286.444	852.751	708.652	591.727	634.668	735.621	585.453	645.624	749.101	504.905	565.364	766.21	535.882	483.101	739.879	516.605
54	0.53	798.955	1116.06	300.28	847.529	1111.02	243.266	821.812	1113.74	370.984	877.921	971.582	200.54	883.558	979.525	460.535	823.263	933.403	327.055	803.396	695.719	66.268	604.336	732.75	140.571	647.239	758.687	205.971	579.299	782.055	213.612	524.03	731.804	286.471	852.727	708.63	591.712	634.623	735.632	585.439	645.636	749.101	504.93	565.355	766.223	535.882	483.074	739.9	516.637
55	0.54	798.953	1116.04	300.276	847.545	1110.98	243.251	821.809	1113.72	370.973	877.913	971.571	200.526	883.517	979.519	460.519	823.344	933.392	327.034	803.357	695.703	66.2786	604.31	732.707	140.565	647.234	758.664	205.961	579.3	782.042	213.598	524.071	731.767	286.467	852.675	708.614	591.733	634.605	735.63	585.442	645.611	749.08	504.923	565.35	766.208	535.889	483.009	739.911	516.619
56	0.55	798.917	1116.04	300.278	847.585	1110.98	243.246	821.821	1113.7	370.964	877.916	971.544	200.512	883.533	979.504	460.487	823.508	933.351	326.988	803.359	695.682	66.2714	604.3	732.72	140.58	647.271	758.643	205.916	579.31	782.019	213.578	524.095	731.754	286.465	852.683	708.615	591.727	634.595	735.623	585.443	645.634	749.066	504.916	565.346	766.203	535.887	483.041	739.907	516.606
57	0.56	798.928	1116.04	300.3	847.575	1111	243.274	821.848	1113.71	370.984	877.906	971.54	200.528	883.536	979.503	460.491	823.582	933.362	326.975	803.401	695.698	66.2752	604.242	732.738	140.639	647.275	758.625	205.931	579.316	782.027	213.607	524.075	731.775	286.472	852.727	708.65	591.723	634.609	735.635	585.466	645.683	749.075	504.937	565.363	766.225	535.923	483.062	739.9	516.63
58	0.57	798.921	1116.04	300.34	847.558	1111	243.283	821.852	1113.71	371.011	877.888	971.548	200.56	883.539	979.504	460.512	823.535	933.411	326.99	803.39	695.709	66.2923	604.249	732.759	140.677	647.249	758.644	205.956	579.291	782.039	213.632	524.02	731.807	286.491	852.742	708.667	591.748	634.586	735.634	585.476	645.669	749.105	504.967	565.352	766.24	535.961	483.04	739.909	516.632
59	0.58	798.926	1116.05	300.341	847.55	1110.98	243.275	821.869	1113.69	371.003	877.929	971.557	200.537	883.574	979.504	460.489	823.604	933.441	326.957	803.365	695.716	66.2554	604.223	732.769	140.685	647.261	758.623	205.928	579.311	782.019	213.615	524.061	731.771	286.49	852.727	708.666	591.753	634.6	735.627	585.486	645.643	749.095	504.947	565.356	766.218	535.938	483.023	739.927	516.626
60	0.59	798.942	1116.04	300.342	847.589	1110.97	243.273	821.919	1113.67	370.983	877.937	971.562	200.528	883.64	979.503	460.462	823.874	933.409	326.905	803.363	695.706	66.2264	604.199	732.747	140.669	647.28	758.597	205.9	579.34	782.02	213.6	524.146	731.722	286.442	852.734	708.689	591.736	634.62	735.635	585.484	645.662	749.061	504.927	565.381	766.224	535.923	483.054	739.923	516.607
61	0.6	799.016	1116.01	300.377	847.609	1110.96	243.288	821.936	1113.67	371.003	877.925	971.563	200.54	883.683	979.516	460.463	823.957	933.411	326.883	803.378	695.715	66.2473	604.168	732.741	140.704	647.278	758.605	205.921	579.339	782.019	213.612	524.157	731.744	286.439	852.732	708.691	591.75	634.638	735.624	585.496	645.665	749.075	504.958	565.358	766.216	535.944	483.103	739.908	516.632
62	0.61	799.039	1116.01	300.418	847.63	1110.97	243.321	821.965	1113.68	371.054	877.968	971.577	200.559	883.684	979.526	460.495	823.909	933.504	326.914	803.376	695.753	66.2648	604.155	732.738	140.727	647.267	758.62	205.944	579.336	782.024	213.633	524.127	731.771	286.467	852.741	708.689	591.761	634.628	735.626	585.514	645.648	749.103	504.997	565.324	766.235	536.004	483.037	739.941	516.663
63	0.62	799.069	1116	300.454	847.665	1110.97	243.353	822.027	1113.7	371.083	877.982	971.6	200.575	883.708	979.539	460.515	823.964	933.549	326.911	803.351	695.793	66.2449	604.14	732.733	140.719	647.236	758.654	205.937	579.273	782.04	213.657	524.126	731.771	286.499	852.725	708.685	591.762	634.625	735.638	585.526	645.635	749.138	505.008	565.307	766.251	535.998	483.059	739.934	516.664
64	0.63	799.096	1116.02	300.491	847.69	1110.97	243.369	822.057	1113.71	371.101	877.98	971.615	200.592	883.71	979.556	460.508	824.09	933.546	326.904	803.363	695.849	66.2397	604.103	732.742	140.726	647.247	758.681	205.928	579.265	782.053	213.677	524.075	731.76	286.523	852.74	708.703	591.766	634.621	735.644	585.53	645.628	749.153	505.014	565.326	766.242	535.985	483.049	739.922	516.677
65	0.64	799.164	1116.02	300.526	847.706	1110.99	243.398	822.082	1113.72	371.125	878.011	971.636	200.611	883.726	979.561	460.533	824.185	933.551	326.924	803.369	695.884	66.2373	604.071	732.764	140.784	647.255	758.673	205.933	579.29	782.055	213.687	524.08	731.755	286.543	852.743	708.723	591.779	634.62	735.645	585.551	645.625	749.153	505.018	565.319	766.236	536.007	482.958	739.948	516.722
66	0.65	799.179	1116.04	300.551	847.744	1111	243.437	822.119	1113.72	371.154	878.013	971.642	200.623	883.75	979.559	460.56	824.265	933.585	326.926	803.346	695.885	66.2275	604.016	732.817	140.865	647.274	758.661	205.914	579.301	782.057	213.688	524.099	731.772	286.548	852.738	708.725	591.781	634.609	735.649	585.576	645.624	749.135	505.03	565.314	766.233	536.051	482.975	739.951	516.728
67	0.66	799.197	1116.07	300.606	847.747	1111.01	243.483	822.165	1113.73	371.178	878.044	971.66	200.627	883.778	979.554	460.554	824.366	933.594	326.917	803.334	695.893	66.1966	603.951	732.864	140.936	647.27	758.653	205.906	579.331	782.054	213.694	524.115	731.771	286.571	852.746	708.74	591.779	634.613	735.661	585.587	645.636	749.129	505.004	565.332	766.255	536.065	483.037	739.942	516.71
68	0.67	799.298	1116.08	300.643	847.797	1111	243.505	822.204	1113.74	371.198	878.079	971.66	200.618	883.803	979.557	460.564	824.427	933.595	326.921	803.356	695.909	66.1925	603.937	732.858	140.951	647.255	758.623	205.905	579.303	782.034	213.712	524.093	731.778	286.571	852.754	708.734	591.781	634.657	735.669	585.595	645.682	749.105	505.019	565.371	766.248	536.076	483.084	739.944	516.712
69	0.68	799.353	1116.08	300.658	847.872	1111.01	243.528	822.233	1113.74	371.225	878.068	971.679	200.659	883.817	979.554	460.609	824.489	933.616	326.924	803.379	695.936	66.2215	603.913	732.827	140.956	647.229	758.622	205.916	579.3	782.021	213.723	524.059	731.805	286.581	852.742	708.705	591.79	634.627	735.661	585.627	645.691	749.1	505.064	565.355	766.253	536.105	483.022	739.976	516.731
70	0.69	799.429	1116.12	300.698	847.895	1111.03	243.571	822.274	1113.76	371.253	878.054	971.696	200.688	883.844	979.565	460.649	824.536	933.651	326.96	803.399	695.974	66.2343	603.886	732.833	141.001	647.223	758.667	205.927	579.286	782.017	213.713	524.061	731.835	286.638	852.748	708.723	591.795	634.63	735.649	585.646	645.699	749.122	505.095	565.336	766.251	536.113	483.045	739.957	516.75
71	0.7	799.45	1116.16	300.756	847.881	1111.04	243.625	822.285	1113.76	371.291	878.066	971.71	200.704	883.82	979.568	460.667	824.575	933.665	326.993	803.403	696.017	66.2382	603.88	732.819	141.037	647.233	758.674	205.948	579.255	782.037	213.746	524.058	731.822	286.665	852.734	708.724	591.8	634.657	735.65	585.666	645.691	749.13	505.131	565.315	766.26	536.137	483.055	739.968	516.749
72	0.71	799.451	1116.16	300.796	847.918	1111.05	243.668	822.283	1113.76	371.325	878.088	971.724	200.723	883.778	979.554	460.688	824.628	933.679	326.995	803.405	696.07	66.2399	603.827	732.798	141.092	647.227	758.677	205.936	579.262	782.027	213.762	523.987	731.826	286.701	852.714	708.708	591.826	634.625	735.646	585.679	645.674	749.134	505.132	565.311	766.268	536.153	482.999	739.966	516.776
73	0.72	799.528	1116.13	300.833	847.978	1111.06	243.7	822.321	1113.75	371.347	878.091	971.724	200.742	883.76	979.536	460.703	824.714	933.666	327.01	803.43	696.096	66.2243	603.75	732.776	141.152	647.23	758.642	205.924	579.297	781.988	213.773	524.042	731.798	286.703	852.681	708.704	591.846	634.562	735.647	585.696	645.732	749.121	505.13	565.292	766.256	536.195	483.077	739.923	516.805
74	0.73	799.597	1116.11	300.893	848.015	1111.07	243.75	822.348	1113.74	371.367	878.07	971.759	200.764	883.741	979.527	460.71	824.796	933.651	327.017	803.423	696.121	66.2222	603.752	732.795	141.157	647.265	758.6	205.91	579.327	781.972	213.787	524.145	731.761	286.722	852.654	708.701	591.862	634.567	735.665	585.715	645.758	749.107	505.144	565.272	766.262	536.213	483.048	739.953	516.816
75	0.74	799.593	1116.12	300.944	848.01	1111.09	243.788	822.377	1113.76	371.407	878.066	971.802	200.777	883.726	979.535	460.729	824.869	933.667	327.02	803.415	696.153	66.2258	603.789	732.817	141.124	647.25	758.575	205.915	579.325	781.983	213.807	524.121	731.771	286.732	852.639	708.703	591.883	634.567	735.68	585.731	645.716	749.129	505.173	565.254	766.277	536.221	483.018	739.982	516.834
76	0.75	799.565	1116.15	301.001	848.003	1111.12	243.816	822.392	1113.76	371.438	878.082	971.82	200.779	883.711	979.543	460.736	824.878	933.676	327.018	803.395	696.175	66.2234	603.744	732.812	141.162	647.248	758.583	205.905	579.321	781.979	213.828	524.129	731.79	286.709	852.629	708.713	591.898	634.545	735.677	585.728	645.646	749.149	505.19	565.233	766.299	536.24	482.916	740.025	516.846
77	0.76	799.559	1116.2	301.055	848.028	1111.15	243.862	822.401	1113.78	371.469	878.081	971.849	200.799	883.707	979.552	460.749	824.915	933.697	327.013	803.429	696.232	66.2238	603.706	732.828	141.184	647.267	758.627	205.908	579.318	781.978	213.839	524.133	731.787	286.702	852.64	708.74	591.907	634.519	735.697	585.749	645.681	749.157	505.209	565.246	766.309	536.252	482.883	740.056	516.851
78	0.77	798.691	1116.63	301.383	848.002	1111.19	243.928	822.399	1113.8	371.507	878.032	971.858	200.848	883.718	979.578	460.794	824.952	933.763	327.046	803.467	696.315	66.232	604.002	732.748	141.01	647.262	758.677	205.93	579.294	782.009	213.891	524.141	731.787	286.74	852.666	708.773	591.925	634.538	735.69	585.787	645.707	749.177	505.24	565.257	766.314	536.288	482.969	740.038	516.872
79	0.78	797.518	1117.16	301.781	847.955	1111.22	243.98	822.398	1113.81	371.552	878.019	971.855	200.88	883.719	979.579	460.84	824.933	933.803	327.087	803.472	696.367	66.2505	604.342	732.668	140.824	647.261	758.696	205.962	579.263	782.041	213.9	524.094	731.821	286.763	852.673	708.791	591.958	634.571	735.669	585.795	645.711	749.197	505.251	565.243	766.308	536.307	482.968	740.012	516.88
80	0.79	798.049	1116.89	301.661	847.944	1111.21	244.016	822.417	1113.8	371.586	878.011	971.856	200.872	883.741	979.578	460.849	824.97	933.848	327.085	803.464	696.367	66.2629	603.712	732.808	141.228	647.284	758.696	205.949	579.264	782.053	213.881	524.073	731.84	286.772	852.679	708.814	591.984	634.594	735.659	585.807	645.756	749.173	505.258	565.25	766.296	536.293	482.983	739.987	516.878
81	0.8	797.279	1117.2	301.935	847.925	1111.2	244.042	822.42	1113.79	371.606	877.998	971.874	200.875	883.765	979.59	460.862	825.012	933.849	327.083	803.476	696.383	66.2592	603.616	732.833	141.31	647.294	758.689	205.918	579.306	782.049	213.883	524.118	731.817	286.786	852.67	708.794	591.974	634.589	735.663	585.818	645.78	749.172	505.271	565.255	766.299	536.288	482.981	739.998	516.866
82	0.81	798.959	1116.46	301.513	847.885	1111.18	244.091	822.404	1113.76	371.638	878.009	971.882	200.904	883.75	979.6	460.897	825.026	933.829	327.128	803.454	696.383	66.2539	603.584	732.851	141.371	647.276	758.672	205.922	579.293	782.045	213.912	524.155	731.806	286.816	852.646	708.765	591.964	634.581	735.683	585.842	645.773	749.165	505.28	565.271	766.324	536.315	482.984	740.029	516.884
83	0.82	799.35	1116.23	301.43	847.864	1111.14	244.117	822.377	1113.74	371.667	878.008	971.881	200.899	883.766	979.616	460.921	825.05	933.829	327.172	803.439	696.367	66.2351	603.565	732.845	141.408	647.272	758.633	205.9	579.254	782.027	213.926	524.099	731.814	286.808	852.652	708.786	591.988	634.593	735.698	585.863	645.724	749.156	505.301	565.259	766.34	536.346	483.008	740.051	516.89
84	0.83	799.403	1116.15	301.413	847.864	1111.12	244.115	822.358	1113.72	371.658	878.016	971.899	200.899	883.795	979.617	460.907	825.049	933.848	327.172	803.442	696.37	66.2069	603.552	732.843	141.393	647.283	758.6	205.873	579.285	781.986	213.912	524.145	731.783	286.776	852.664	708.816	592.005	634.604	735.696	585.878	645.721	749.17	505.295	565.238	766.326	536.344	483.037	740.04	516.872
85	0.84	799.392	1116.11	301.425	847.813	1111.1	244.119	822.326	1113.7	371.652	878.014	971.92	200.896	883.805	979.624	460.888	825.019	933.868	327.169	803.434	696.372	66.197	603.52	732.835	141.367	647.293	758.579	205.885	579.305	781.975	213.905	524.126	731.786	286.793	852.656	708.828	592.014	634.572	735.7	585.858	645.705	749.179	505.278	565.229	766.337	536.335	483.018	740.034	516.888
86	0.85	799.379	1116.09	301.451	847.776	1111.08	244.153	822.295	1113.68	371.678	877.961	971.922	200.927	883.798	979.651	460.908	825.037	933.892	327.196	803.408	696.421	66.1969	603.536	732.824	141.383	647.273	758.605	205.908	579.282	781.99	213.941	524.15	731.764	286.846	852.661	708.857	592.036	634.572	735.696	585.848	645.677	749.187	505.322	565.245	766.315	536.331	482.998	740.029	516.919
87	0.86	799.392	1116.06	301.458	847.762	1111.05	244.177	822.269	1113.68	371.702	877.93	971.933	200.95	883.792	979.691	460.932	825.093	933.909	327.215	803.417	696.461	66.2112	603.579	732.837	141.394	647.253	758.648	205.936	579.258	782.007	213.968	524.157	731.766	286.871	852.644	708.864	592.059	634.551	735.675	585.85	645.719	749.21	505.37	565.245	766.294	536.334	482.979	740.012	516.93
88	0.87	799.381	1116.04	301.439	847.705	1111.04	244.153	822.237	1113.66	371.703	877.956	971.947	200.946	883.795	979.711	460.932	825.094	933.94	327.211	803.459	696.48	66.2196	603.569	732.825	141.386	647.25	758.651	205.971	579.249	782.005	213.958	524.105	731.777	286.854	852.62	708.878	592.08	634.533	735.672	585.868	645.747	749.22	505.366	565.251	766.283	536.322	482.989	739.99	516.919
89	0.88	799.287	1116.05	301.428	847.668	1111.04	244.124	822.21	1113.65	371.686	877.964	971.965	200.928	883.801	979.732	460.924	825.088	933.977	327.204	803.483	696.509	66.2307	603.574	732.782	141.358	647.24	758.666	205.958	579.237	782.012	213.943	524.076	731.79	286.826	852.595	708.884	592.089	634.53	735.646	585.86	645.75	749.205	505.351	565.28	766.284	536.315	482.983	739.976	516.899
90	0.89	799.248	1116.04	301.42	847.686	1111.03	244.085	822.198	1113.64	371.673	877.956	971.972	200.913	883.792	979.749	460.924	825.073	934.006	327.2	803.47	696.514	66.2183	603.612	732.811	141.327	647.262	758.656	205.934	579.24	782.014	213.933	524.062	731.795	286.839	852.597	708.907	592.124	634.534	735.644	585.847	645.769	749.198	505.345	565.265	766.28	536.323	483.007	739.963	516.902
91	0.9	799.233	1116.03	301.37	847.667	1111.01	244.054	822.186	1113.64	371.649	877.958	971.98	200.899	883.782	979.753	460.898	825.162	933.98	327.149	803.46	696.514	66.1966	603.694	732.83	141.29	647.266	758.659	205.93	579.277	781.995	213.902	524.088	731.806	286.822	852.623	708.937	592.143	634.56	735.67	585.836	645.765	749.183	505.324	565.281	766.272	536.321	483.051	739.963	516.876
92	0.91	799.206	1116	301.296	847.637	1111	244.017	822.167	1113.62	371.605	877.987	971.992	200.874	883.807	979.741	460.871	825.139	933.995	327.113	803.457	696.512	66.1903	603.704	732.826	141.282	647.264	758.624	205.898	579.297	781.992	213.869	524.086	731.804	286.776	852.658	708.971	592.142	634.563	735.673	585.811	645.76	749.176	505.296	565.315	766.274	536.275	483.077	739.963	516.836
93	0.92	799.212	1115.98	301.247	847.639	1111	243.979	822.146	1113.6	371.572	878.014	972.022	200.845	883.796	979.729	460.841	825.142	933.994	327.063	803.446	696.491	66.167	603.691	732.852	141.247	647.268	758.599	205.899	579.31	782.002	213.843	524.12	731.764	286.731	852.672	709.023	592.156	634.583	735.654	585.79	645.735	749.176	505.28	565.301	766.293	536.253	483.082	739.97	516.818
94	0.93	799.225	1115.95	301.231	847.613	1111.01	243.946	822.139	1113.59	371.564	877.975	972.042	200.846	883.797	979.737	460.827	825.196	933.984	327.039	803.454	696.514	66.1537	603.709	732.877	141.22	647.283	758.604	205.899	579.294	782.024	213.839	524.181	731.753	286.714	852.636	709.053	592.17	634.594	735.667	585.787	645.72	749.168	505.251	565.295	766.319	536.261	483.079	740.001	516.803
95	0.94	799.165	1115.95	301.225	847.596	1111.02	243.918	822.119	1113.6	371.555	877.916	972.041	200.856	883.792	979.764	460.819	825.22	934.004	327.038	803.441	696.552	66.1409	603.742	732.873	141.213	647.287	758.64	205.918	579.304	782.024	213.834	524.225	731.753	286.692	852.602	709.067	592.177	634.612	735.697	585.758	645.733	749.181	505.239	565.301	766.312	536.238	483.019	740.038	516.805
96	0.95	799.098	1115.99	301.216	847.556	1111.01	243.923	822.072	1113.62	371.557	877.89	972.07	200.852	883.751	979.799	460.817	825.167	934.03	327.05	803.436	696.592	66.1411	603.719	732.873	141.196	647.239	758.672	205.928	579.296	782.018	213.835	524.11	731.826	286.718	852.614	709.082	592.19	634.567	735.681	585.72	645.682	749.216	505.239	565.257	766.298	536.204	482.942	740.033	516.799
97	0.96	799.062	1116	301.21	847.534	1111.01	243.924	822.007	1113.64	371.573	877.889	972.105	200.869	883.73	979.832	460.831	825.077	934.096	327.047	803.458	696.653	66.1486	603.695	732.848	141.214	647.238	758.694	205.964	579.26	782.042	213.857	524.023	731.86	286.747	852.615	709.095	592.197	634.528	735.709	585.735	645.632	749.256	505.255	565.238	766.304	536.203	482.935	740.021	516.785
98	0.97	799.107	1115.98	301.208	847.547	1110.98	243.912	822.022	1113.62	371.568	877.908	972.108	200.856	883.749	979.83	460.838	825.073	934.122	327.043	803.469	696.667	66.1368	603.714	732.839	141.234	647.233	758.696	206.012	579.301	782.042	213.866	524.071	731.824	286.747	852.643	709.091	592.188	634.524	735.711	585.754	645.684	749.251	505.278	565.261	766.304	536.215	482.948	740.003	516.81
99	0.98	799.131	1115.94	301.182	847.567	1110.97	243.898	822.065	1113.59	371.542	877.914	972.113	200.842	883.779	979.814	460.817	825.093	934.074	327.01	803.455	696.647	66.1015	603.747	732.841	141.205	647.24	758.662	205.984	579.324	782.014	213.851	524.055	731.81	286.722	852.651	709.089	592.182	634.533	735.68	585.737	645.749	749.207	505.253	565.241	766.283	536.215	482.966	740.008	516.805
100	0.99	799.091	1115.92	301.186	847.571	1110.96	243.869	822.079	1113.56	371.509	877.903	972.09	200.811	883.789	979.785	460.799	825.126	934.023	326.981	803.421	696.629	66.0637	603.726	732.832	141.199	647.222	758.61	205.946	579.329	781.995	213.828	524.115	731.761	286.697	852.647	709.07	592.146	634.518	735.666	585.722	645.754	749.169	505.209	565.272	766.27	536.203	483.015	739.995	516.783
101	1	799.105	1115.92	301.16	847.566	1110.94	243.848	822.095	1113.54	371.496	877.915	972.114	200.809	883.795	979.776	460.796	825.154	934.012	326.969	803.401	696.628	66.0451	603.736	732.803	141.175	647.22	758.591	205.921	579.35	781.956	213.811	524.114	731.767	286.67	852.667	709.054	592.123	634.542	735.659	585.708	645.741	749.145	505.202	565.285	766.26	536.203	483.047	739.974	516.77
102	1.01	799.138	1115.92	301.128	847.585	1110.92	243.844	822.11	1113.55	371.48	877.925	972.128	200.803	883.785	979.78	460.791	825.152	934.02	326.972	803.392	696.638	66.0309	603.724	732.811	141.193	647.245	758.611	205.91	579.348	781.956	213.782	524.07	731.787	286.682	852.688	709.051	592.12	634.538	735.661	585.713	645.787	749.145	505.216	565.306	766.241	536.197	483.064	739.958	516.774
103	1.02	799.128	1115.96	301.121	847.57	1110.91	243.819	822.095	1113.56	371.476	877.926	972.127	200.785	883.752	979.788	460.781	825.105	934.066	326.963	803.399	696.686	66.019	603.758	732.802	141.169	647.271	758.62	205.885	579.293	781.981	213.783	524.078	731.775	286.683	852.706	709.071	592.099	634.534	735.67	585.698	645.79	749.149	505.188	565.306	766.225	536.176	483.07	739.968	516.763
104	1.03	799.047	1115.99	301.121	847.533	1110.9	243.807	822.073	1113.58	371.47	877.864	972.151	200.798	883.743	979.808	460.774	825.027	934.127	326.972	803.398	696.744	66.0024	603.808	732.76	141.16	647.256	758.651	205.875	579.277	781.99	213.791	524.111	731.754	286.679	852.68	709.057	592.098	634.537	735.688	585.686	645.75	749.167	505.198	565.273	766.238	536.185	483.049	739.965	516.76
105	1.04	799.021	1115.99	301.108	847.535	1110.91	243.791	822.06	1113.61	371.471	877.852	972.181	200.813	883.754	979.854	460.773	825.078	934.152	326.961	803.375	696.797	65.9701	603.796	732.765	141.159	647.218	758.691	205.897	579.274	781.999	213.805	524.07	731.807	286.69	852.637	709.054	592.101	634.549	735.703	585.714	645.744	749.211	505.225	565.225	766.277	536.21	483.014	739.99	516.776
106	1.05	799.008	1115.99	301.094	847.55	1110.93	243.787	822.069	1113.61	371.462	877.885	972.235	200.811	883.774	979.883	460.768	825.099	934.172	326.96	803.402	696.868	65.9767	603.777	732.773	141.16	647.229	758.68	205.902	579.292	782.014	213.827	524.081	731.819	286.713	852.652	709.095	592.11	634.527	735.702	585.733	645.705	749.243	505.228	565.238	766.307	536.208	482.989	740.014	516.799
107	1.06	799.035	1115.97	301.074	847.531	1110.93	243.778	822.062	1113.59	371.438	877.896	972.267	200.79	883.794	979.875	460.753	825.092	934.206	326.942	803.401	696.911	65.9705	603.747	732.798	141.165	647.222	758.676	205.916	579.299	782.008	213.831	524.062	731.824	286.73	852.66	709.13	592.12	634.524	735.716	585.748	645.68	749.245	505.231	565.263	766.313	536.204	482.986	740.037	516.796
108	1.07	799.114	1115.92	301.044	847.552	1110.93	243.748	822.092	1113.57	371.419	877.934	972.294	200.766	883.804	979.858	460.737	825.118	934.208	326.913	803.352	696.92	65.9452	603.736	732.813	141.166	647.222	758.655	205.91	579.314	781.989	213.81	524.12	731.786	286.703	852.654	709.151	592.132	634.523	735.721	585.743	645.711	749.202	505.21	565.29	766.307	536.207	482.946	740.042	516.8
109	1.08	799.113	1115.89	301.04	847.563	1110.93	243.734	822.127	1113.55	371.409	877.945	972.327	200.758	883.823	979.845	460.727	825.164	934.197	326.912	803.347	696.921	65.9429	603.673	732.815	141.191	647.225	758.643	205.887	579.327	781.968	213.811	524.163	731.746	286.725	852.679	709.163	592.127	634.531	735.695	585.747	645.727	749.185	505.221	565.258	766.303	536.222	482.97	740.018	516.821
110	1.09	799.153	1115.85	301.014	847.583	1110.9	243.749	822.157	1113.54	371.406	877.944	972.34	200.756	883.87	979.845	460.735	825.209	934.18	326.934	803.359	696.945	65.9444	603.651	732.806	141.224	647.225	758.649	205.917	579.337	781.968	213.816	524.156	731.752	286.731	852.69	709.158	592.125	634.567	735.696	585.747	645.718	749.197	505.244	565.266	766.291	536.23	483.011	739.97	516.812
111	1.1	799.183	1115.85	300.987	847.58	1110.89	243.749	822.152	1113.54	371.398	877.986	972.353	200.762	883.889	979.857	460.751	825.173	934.217	326.945	803.355	696.962	65.9376	603.652	732.812	141.238	647.186	758.668	205.936	579.305	781.987	213.828	524.11	731.78	286.747	852.684	709.158	592.129	634.61	735.693	585.722	645.708	749.197	505.238	565.265	766.288	536.239	483.039	739.948	516.818
112	1.11	799.184	1115.88	300.96	847.611	1110.89	243.723	822.17	1113.55	371.381	877.965	972.347	200.75	883.923	979.862	460.756	825.139	934.243	326.949	803.352	696.963	65.9346	603.662	732.83	141.212	647.17	758.694	205.917	579.268	782.003	213.834	524.149	731.78	286.747	852.699	709.162	592.13	634.604	735.673	585.735	645.722	749.201	505.234	565.275	766.287	536.253	483.07	739.948	516.808
113	1.12	799.168	1115.88	300.922	847.649	1110.89	243.695	822.204	1113.56	371.363	877.96	972.353	200.742	883.952	979.866	460.749	825.15	934.25	326.934	803.373	697.001	65.9411	603.649	732.816	141.214	647.187	758.71	205.894	579.274	782.014	213.837	524.079	731.809	286.748	852.715	709.187	592.128	634.587	735.679	585.753	645.744	749.211	505.235	565.25	766.289	536.251	483.076	739.954	516.812
114	1.13	799.211	1115.89	300.904	847.675	1110.9	243.682	822.222	1113.58	371.345	877.962	972.366	200.752	883.968	979.884	460.758	825.195	934.271	326.934	803.381	697.02	65.947	603.57	732.812	141.288	647.215	758.716	205.885	579.273	782.014	213.841	524.042	731.829	286.769	852.714	709.209	592.142	634.584	735.702	585.779	645.749	749.223	505.252	565.262	766.291	536.271	483.063	739.965	516.833
115	1.14	799.213	1115.94	300.91	847.718	1110.89	243.691	822.211	1113.61	371.328	877.998	972.409	200.78	883.967	979.918	460.788	825.236	934.304	326.946	803.413	697.039	65.9667	603.562	732.835	141.366	647.203	758.744	205.926	579.253	782.039	213.881	524.044	731.844	286.789	852.72	709.243	592.159	634.559	735.729	585.812	645.722	749.245	505.301	565.28	766.291	536.294	483.069	739.966	516.868
116	1.15	799.198	1115.99	300.891	847.743	1110.88	243.697	822.211	1113.64	371.314	877.99	972.439	200.798	883.944	979.937	460.804	825.184	934.348	326.979	803.405	697.078	65.9616	603.604	732.811	141.354	647.213	758.722	205.912	579.281	782.026	213.897	524.067	731.853	286.797	852.695	709.232	592.156	634.577	735.736	585.824	645.716	749.259	505.336	565.249	766.305	536.321	483.013	740.012	516.882
117	1.16	799.281	1115.98	300.839	847.774	1110.86	243.664	822.224	1113.65	371.285	877.988	972.442	200.786	883.924	979.944	460.805	825.181	934.337	326.986	803.379	697.092	65.9424	603.633	732.802	141.294	647.227	758.686	205.868	579.272	782.021	213.878	524.076	731.835	286.786	852.673	709.245	592.171	634.573	735.756	585.819	645.73	749.242	505.322	565.241	766.336	536.335	482.985	740.034	516.852
118	1.17	799.292	1115.97	300.788	847.808	1110.85	243.636	822.21	1113.64	371.248	878.031	972.441	200.743	883.913	979.948	460.793	825.219	934.341	326.951	803.379	697.107	65.9406	603.66	732.806	141.271	647.233	758.639	205.837	579.281	781.992	213.863	524.12	731.801	286.772	852.677	709.27	592.19	634.53	735.768	585.81	645.704	749.237	505.29	565.225	766.341	536.316	482.972	740.062	516.853
119	1.18	799.339	1115.96	300.75	847.846	1110.84	243.619	822.215	1113.64	371.233	878.033	972.463	200.761	883.918	979.95	460.785	825.227	934.356	326.941	803.405	697.134	65.9403	603.581	732.791	141.292	647.212	758.622	205.858	579.305	781.985	213.86	524.169	731.783	286.77	852.662	709.251	592.192	634.535	735.743	585.825	645.667	749.238	505.281	565.235	766.345	536.315	482.966	740.053	516.87
120	1.19	799.411	1115.96	300.739	847.864	1110.83	243.623	822.25	1113.66	371.238	878.022	972.489	200.788	883.957	979.955	460.807	825.155	934.424	327.015	803.43	697.153	65.9587	603.504	732.793	141.334	647.186	758.632	205.897	579.255	781.985	213.902	524.102	731.831	286.834	852.647	709.262	592.193	634.561	735.722	585.851	645.699	749.237	505.316	565.221	766.332	536.318	482.978	740.015	516.89
121	1.2	799.372	1115.97	300.747	847.872	1110.82	243.635	822.271	1113.67	371.244	878.05	972.528	200.804	883.967	979.965	460.84	825.123	934.472	327.06	803.451	697.172	65.9858	603.494	732.775	141.363	647.19	758.645	205.911	579.239	781.999	213.957	524.066	731.846	286.868	852.623	709.27	592.208	634.561	735.718	585.887	645.716	749.241	505.363	565.228	766.325	536.328	483.008	740.008	516.91
122	1.21	799.39	1115.96	300.737	847.896	1110.82	243.624	822.274	1113.66	371.234	878.087	972.567	200.819	883.977	979.965	460.841	825.136	934.502	327.059	803.474	697.199	66.0026	603.512	732.763	141.373	647.195	758.665	205.925	579.25	781.997	213.959	523.992	731.853	286.881	852.625	709.252	592.219	634.539	735.706	585.87	645.726	749.218	505.362	565.245	766.31	536.335	483.047	739.984	516.889
123	1.22	799.434	1115.97	300.729	847.935	1110.82	243.623	822.302	1113.67	371.236	878.069	972.599	200.834	884.005	979.966	460.838	825.1	934.559	327.062	803.474	697.239	66.0134	603.466	732.774	141.378	647.205	758.68	205.948	579.243	781.998	213.966	523.981	731.856	286.88	852.621	709.243	592.217	634.582	735.725	585.88	645.733	749.21	505.377	565.268	766.29	536.328	483.045	739.986	516.892
124	1.23	799.481	1115.99	300.733	847.948	1110.85	243.63	822.324	1113.68	371.233	878.083	972.637	200.833	884.028	979.977	460.854	825.123	934.572	327.084	803.493	697.265	66.0226	603.454	732.8	141.412	647.202	758.681	205.926	579.239	782.018	213.974	524.063	731.847	286.899	852.665	709.272	592.217	634.593	735.733	585.897	645.751	749.218	505.401	565.256	766.3	536.336	483.067	739.986	516.917
125	1.24	799.527	1115.99	300.715	847.968	1110.85	243.64	822.33	1113.68	371.225	878.133	972.661	200.811	884.049	979.977	460.867	825.162	934.573	327.055	803.514	697.292	66.0354	603.518	732.823	141.42	647.185	758.688	205.911	579.233	782.016	213.95	524.127	731.81	286.882	852.661	709.286	592.211	634.566	735.748	585.896	645.719	749.225	505.4	565.25	766.323	536.346	483.058	740.008	516.92
126	1.25	799.526	1115.99	300.679	847.975	1110.86	243.627	822.319	1113.68	371.187	878.133	972.668	200.79	884.049	979.973	460.855	825.241	934.585	326.997	803.512	697.294	66.0306	603.436	732.836	141.431	647.202	758.692	205.878	579.235	782.003	213.93	524.077	731.823	286.849	852.639	709.283	592.191	634.542	735.763	585.903	645.687	749.229	505.343	565.248	766.344	536.35	483.017	740.02	516.904
127	1.26	799.563	1115.98	300.668	848.012	1110.87	243.612	822.333	1113.7	371.174	878.113	972.679	200.786	884.048	979.987	460.843	825.239	934.618	327	803.501	697.317	66.0085	603.414	732.832	141.445	647.198	758.704	205.881	579.267	782.005	213.884	524.123	731.803	286.813	852.669	709.296	592.174	634.544	735.758	585.862	645.705	749.239	505.312	565.27	766.361	536.326	482.997	740.044	516.896
128	1.27	799.598	1115.97	300.672	848.027	1110.88	243.611	822.346	1113.71	371.193	878.043	972.719	200.826	884.045	980.006	460.86	825.219	934.65	327.042	803.497	697.371	65.9956	603.455	732.847	141.437	647.175	758.73	205.919	579.249	782.025	213.902	524.144	731.8	286.829	852.704	709.317	592.166	634.529	735.76	585.833	645.671	749.244	505.335	565.254	766.354	536.343	482.984	740.058	516.894
129	1.28	799.492	1116	300.706	848.006	1110.87	243.639	822.331	1113.71	371.217	878.067	972.759	200.842	884.009	980.005	460.882	825.094	934.703	327.097	803.521	697.432	66.0147	603.404	732.842	141.484	647.146	758.766	205.94	579.165	782.056	213.961	524.099	731.831	286.856	852.713	709.313	592.19	634.533	735.77	585.867	645.658	749.271	505.367	565.206	766.352	536.363	482.934	740.045	516.916
130	1.29	799.468	1116	300.725	848.018	1110.86	243.662	822.311	1113.69	371.219	878.072	972.772	200.86	883.984	980.004	460.913	825.042	934.744	327.122	803.55	697.473	66.0342	603.303	732.835	141.565	647.134	758.782	205.944	579.118	782.059	213.995	524.059	731.849	286.905	852.686	709.274	592.182	634.542	735.76	585.876	645.661	749.27	505.388	565.187	766.343	536.361	482.921	740.018	516.93
131	1.3	799.529	1115.94	300.744	848.019	1110.83	243.67	822.338	1113.67	371.217	878.096	972.778	200.848	884.002	979.994	460.928	825.118	934.728	327.131	803.516	697.486	66.0079	603.322	732.817	141.574	647.137	758.74	205.937	579.172	782.002	214.001	524.105	731.799	286.929	852.652	709.246	592.164	634.555	735.745	585.883	645.655	749.255	505.405	565.224	766.355	536.374	482.925	740	516.949
132	1.31	799.592	1115.89	300.738	848.059	1110.8	243.661	822.377	1113.63	371.222	878.09	972.785	200.836	884.048	979.98	460.924	825.187	934.695	327.146	803.505	697.488	65.9921	603.407	732.787	141.534	647.197	758.678	205.891	579.244	781.986	213.987	524.138	731.767	286.948	852.656	709.226	592.165	634.552	735.736	585.9	645.703	749.234	505.411	565.217	766.354	536.404	482.989	739.999	516.948
133	1.32	799.595	1115.86	300.707	848.055	1110.78	243.655	822.344	1113.61	371.205	878.084	972.817	200.834	884.066	979.956	460.904	825.205	934.71	327.144	803.494	697.498	65.9759	603.404	732.758	141.496	647.2	758.654	205.868	579.261	781.972	213.957	524.161	731.753	286.935	852.66	709.217	592.169	634.567	735.734	585.909	645.701	749.21	505.397	565.224	766.339	536.394	482.954	740.024	516.95
134	1.33	799.542	1115.84	300.693	848.042	1110.77	243.663	822.295	1113.61	371.189	878.087	972.854	200.858	884.057	979.949	460.897	825.145	934.766	327.123	803.481	697.533	65.9635	603.336	732.767	141.5	647.171	758.668	205.861	579.234	781.979	213.935	524.072	731.792	286.928	852.66	709.217	592.161	634.562	735.735	585.91	645.706	749.203	505.392	565.201	766.336	536.397	482.887	740.033	516.933
135	1.34	799.524	1115.85	300.69	848.021	1110.75	243.667	822.281	1113.61	371.181	878.054	972.883	200.881	884.066	979.964	460.921	825.161	934.812	327.13	803.488	697.587	65.9571	603.325	732.789	141.495	647.18	758.699	205.866	579.226	781.996	213.953	523.989	731.859	286.955	852.673	709.25	592.177	634.525	735.738	585.909	645.703	749.213	505.388	565.194	766.332	536.386	482.897	740.024	516.931
136	1.35	799.496	1115.87	300.692	847.997	1110.76	243.657	822.275	1113.61	371.165	878.09	972.922	200.863	884.089	979.982	460.934	825.145	934.85	327.126	803.484	697.64	65.9465	603.359	732.795	141.498	647.211	758.711	205.859	579.231	781.99	213.957	524.049	731.842	286.928	852.662	709.277	592.186	634.537	735.752	585.897	645.706	749.233	505.399	565.223	766.333	536.385	482.985	740	516.961
137	1.36	799.442	1115.88	300.704	847.994	1110.75	243.639	822.239	1113.59	371.151	878.082	972.982	200.877	884.082	980.009	460.933	825.119	934.912	327.129	803.475	697.697	65.9418	603.41	732.783	141.485	647.153	758.747	205.873	579.221	782.011	213.928	524.07	731.84	286.931	852.607	709.256	592.171	634.546	735.751	585.889	645.707	749.25	505.408	565.215	766.341	536.373	482.971	740.016	516.961
138	1.37	799.381	1115.88	300.697	847.982	1110.74	243.635	822.196	1113.59	371.133	878.042	973.007	200.897	884.072	980.032	460.953	824.995	934.987	327.171	803.457	697.735	65.9406	603.384	732.803	141.477	647.088	758.77	205.904	579.187	782.037	213.947	524.055	731.847	286.932	852.594	709.262	592.184	634.509	735.754	585.896	645.698	749.282	505.406	565.222	766.356	536.36	482.95	740.024	516.943
139	1.38	799.332	1115.86	300.687	847.974	1110.71	243.627	822.184	1113.59	371.117	878.021	973.031	200.897	884.068	980.039	460.965	824.971	935.003	327.181	803.46	697.772	65.9312	603.382	732.788	141.497	647.132	758.751	205.887	579.221	782.004	213.954	524.044	731.865	286.929	852.639	709.293	592.206	634.51	735.772	585.888	645.685	749.291	505.402	565.205	766.368	536.376	482.909	740.027	516.957
140	1.39	799.435	1115.81	300.659	847.992	1110.69	243.597	822.188	1113.56	371.093	878.026	973.055	200.883	884.115	980.013	460.956	825.078	934.979	327.163	803.461	697.788	65.907	603.385	732.769	141.484	647.138	758.722	205.857	579.234	781.982	213.912	524.194	731.78	286.885	852.646	709.291	592.218	634.547	735.768	585.883	645.676	749.282	505.405	565.212	766.35	536.38	482.908	740.017	516.96
141	1.4	799.502	1115.77	300.605	848.002	1110.66	243.561	822.187	1113.53	371.064	878.037	973.062	200.86	884.13	980.002	460.944	825.109	934.964	327.135	803.436	697.772	65.883	603.398	732.769	141.453	647.152	758.705	205.825	579.201	781.987	213.889	524.23	731.747	286.867	852.634	709.273	592.211	634.571	735.765	585.883	645.641	749.271	505.374	565.223	766.344	536.372	482.95	740.011	516.934
142	1.41	799.44	1115.73	300.558	847.972	1110.63	243.546	822.159	1113.49	371.03	878.036	973.079	200.863	884.111	979.996	460.935	825.112	934.971	327.109	803.431	697.791	65.8891	603.363	732.782	141.459	647.132	758.72	205.82	579.166	781.994	213.884	524.186	731.757	286.869	852.625	709.269	592.197	634.558	735.767	585.873	645.665	749.256	505.36	565.209	766.34	536.376	482.922	740.03	516.907
143	1.42	799.413	1115.71	300.529	847.971	1110.63	243.526	822.136	1113.48	371.013	878.081	973.112	200.86	884.121	979.989	460.939	825.149	934.993	327.114	803.438	697.836	65.8932	603.341	732.778	141.452	647.135	758.742	205.81	579.197	781.983	213.877	524.148	731.759	286.834	852.641	709.283	592.205	634.553	735.764	585.87	645.705	749.249	505.351	565.197	766.351	536.368	482.926	740.038	516.926
144	1.43	799.49	1115.69	300.493	848.016	1110.62	243.505	822.157	1113.49	371.006	878.1	973.134	200.866	884.157	979.989	460.943	825.159	935.027	327.142	803.468	697.871	65.8811	603.396	732.766	141.427	647.13	758.739	205.83	579.228	781.981	213.862	524.205	731.717	286.825	852.655	709.277	592.213	634.584	735.762	585.885	645.719	749.251	505.35	565.242	766.336	536.34	482.969	740.019	516.918
145	1.44	799.492	1115.69	300.446	848.033	1110.61	243.49	822.15	1113.5	371.007	878.225	973.236	200.866	884.16	980.004	460.954	825.103	935.079	327.144	803.478	697.913	65.8901	603.456	732.741	141.373	647.122	758.752	205.864	579.2	781.976	213.834	524.18	731.73	286.837	852.667	709.275	592.194	634.589	735.742	585.867	645.725	749.258	505.359	565.241	766.317	536.316	482.99	739.993	516.888
146	1.45	799.375	1115.74	300.426	848.057	1110.6	243.47	822.124	1113.53	371.007	878.33	973.378	200.871	884.134	980.019	460.979	825.019	935.178	327.14	803.487	697.959	65.9098	603.436	732.749	141.37	647.111	758.799	205.869	579.175	781.985	213.838	524.139	731.776	286.819	852.643	709.265	592.205	634.569	735.717	585.86	645.659	749.29	505.374	565.242	766.301	536.316	482.979	739.971	516.879
147	1.46	799.304	1115.78	300.421	848.041	1110.61	243.457	822.119	1113.56	371.002	878.223	973.37	200.896	884.13	980.048	461.005	824.916	935.262	327.162	803.51	698.002	65.9179	603.414	732.737	141.392	647.079	758.83	205.874	579.178	782.021	213.858	524.053	731.831	286.829	852.61	709.266	592.219	634.578	735.719	585.868	645.638	749.328	505.397	565.269	766.325	536.326	482.971	739.991	516.868
148	1.47	799.338	1115.77	300.402	848.046	1110.61	243.447	822.143	1113.57	370.993	878.362	973.459	200.87	884.146	980.065	461.013	824.931	935.264	327.213	803.516	698.024	65.9234	603.431	732.736	141.397	647.083	758.817	205.898	579.206	782.033	213.872	524.043	731.844	286.862	852.64	709.296	592.225	634.569	735.749	585.883	645.667	749.323	505.415	565.244	766.356	536.341	482.984	740.015	516.888
149	1.48	799.405	1115.73	300.346	848.07	1110.59	243.422	822.151	1113.56	370.957	878.135	973.304	200.89	884.152	980.061	460.995	825.005	935.232	327.206	803.509	698.01	65.9186	603.38	732.772	141.412	647.095	758.781	205.891	579.205	782.02	213.848	524.081	731.83	286.821	852.675	709.333	592.233	634.544	735.76	585.869	645.647	749.296	505.393	565.218	766.366	536.349	482.961	740.037	516.881
150	1.49	799.503	1115.66	300.27	848.093	1110.57	243.375	822.127	1113.53	370.907	878.215	973.354	200.855	884.124	980.038	460.963	825.111	935.195	327.144	803.461	697.963	65.8801	603.44	732.751	141.383	647.124	758.73	205.819	579.222	781.981	213.799	524.082	731.797	286.781	852.635	709.349	592.219	634.479	735.746	585.84	645.622	749.244	505.336	565.208	766.36	536.322	482.85	740.055	516.875
151	1.5	799.514	1115.61	300.238	848.08	1110.55	243.347	822.137	1113.51	370.872	878.345	973.468	200.835	884.107	980.027	460.935	825.153	935.188	327.1	803.433	697.946	65.8494	603.459	732.751	141.371	647.101	758.666	205.801	579.235	781.942	213.774	524.137	731.763	286.761	852.575	709.326	592.229	634.475	735.744	585.826	645.636	749.222	505.31	565.192	766.348	536.305	482.847	740.023	516.866
152	1.51	799.531	1115.59	300.244	848.075	1110.53	243.338	822.179	1113.51	370.881	878.27	973.401	200.843	884.153	980.042	460.945	825.181	935.19	327.132	803.452	697.971	65.8603	603.489	732.747	141.375	647.11	758.674	205.822	579.239	781.932	213.794	524.18	731.738	286.796	852.59	709.332	592.246	634.52	735.756	585.865	645.655	749.228	505.336	565.173	766.342	536.321	482.912	740.028	516.872
153	1.52	799.491	1115.63	300.26	848.073	1110.53	243.338	822.182	1113.54	370.897	878.379	973.501	200.839	884.164	980.074	460.958	825.145	935.238	327.166	803.483	698.032	65.8745	603.477	732.747	141.379	647.118	758.721	205.836	579.186	781.946	213.843	524.157	731.769	286.826	852.587	709.364	592.25	634.499	735.76	585.863	645.648	749.27	505.355	565.159	766.331	536.333	482.922	740.017	516.861
154	1.53	799.474	1115.69	300.252	848.077	1110.54	243.335	822.167	1113.58	370.892	878.266	973.441	200.85	884.177	980.118	460.975	825.077	935.305	327.183	803.502	698.087	65.8908	603.442	732.724	141.363	647.048	758.777	205.852	579.164	781.978	213.845	524.087	731.807	286.823	852.577	709.378	592.252	634.474	735.755	585.843	645.639	749.294	505.371	565.171	766.342	536.32	482.902	740.008	516.846
155	1.54	799.508	1115.73	300.233	848.09	1110.55	243.323	822.199	1113.59	370.884	878.508	973.628	200.817	884.211	980.139	460.985	825.088	935.377	327.184	803.49	698.123	65.8868	603.464	732.731	141.336	647.025	758.805	205.863	579.136	782.012	213.845	524.059	731.827	286.827	852.572	709.392	592.253	634.502	735.747	585.851	645.632	749.304	505.376	565.202	766.344	536.286	482.946	740.007	516.832
156	1.55	799.588	1115.74	300.221	848.138	1110.56	243.313	822.258	1113.6	370.883	878.593	973.687	200.804	884.285	980.142	460.989	825.181	935.4	327.177	803.512	698.148	65.8837	603.505	732.728	141.334	647.066	758.819	205.87	579.126	782.033	213.859	524.084	731.817	286.841	852.62	709.429	592.262	634.541	735.757	585.845	645.67	749.282	505.376	565.249	766.319	536.293	483.017	739.987	516.828
157	1.56	799.612	1115.74	300.179	848.145	1110.57	243.286	822.291	1113.61	370.866	878.618	973.72	200.795	884.328	980.152	460.986	825.262	935.406	327.181	803.51	698.154	65.8902	603.461	732.713	141.348	647.066	758.821	205.877	579.111	782.034	213.85	524.107	731.801	286.831	852.643	709.448	592.266	634.557	735.739	585.833	645.712	749.293	505.381	565.267	766.31	536.307	483.034	739.962	516.839
158	1.57	799.664	1115.72	300.115	848.165	1110.56	243.265	822.282	1113.61	370.832	878.604	973.742	200.79	884.332	980.153	460.979	825.189	935.446	327.173	803.469	698.161	65.8728	603.438	732.729	141.33	647.044	758.803	205.869	579.11	782.012	213.81	524.045	731.821	286.802	852.601	709.435	592.254	634.547	735.738	585.842	645.677	749.306	505.36	565.239	766.326	536.319	482.972	739.979	516.841
159	1.58	799.726	1115.7	300.062	848.206	1110.55	243.255	822.287	1113.62	370.789	878.464	973.676	200.785	884.332	980.153	460.969	825.187	935.45	327.149	803.465	698.167	65.843	603.468	732.733	141.3	647.045	758.791	205.843	579.14	781.997	213.772	524.082	731.784	286.805	852.624	709.461	592.245	634.489	735.75	585.839	645.649	749.286	505.332	565.212	766.33	536.31	482.956	740.009	516.848
160	1.59	799.787	1115.69	300.018	848.26	1110.55	243.224	822.323	1113.62	370.761	878.317	973.587	200.795	884.342	980.152	460.946	825.305	935.444	327.129	803.446	698.167	65.8087	603.507	732.735	141.292	647.083	758.783	205.831	579.156	781.996	213.758	524.127	731.748	286.777	852.647	709.48	592.255	634.512	735.758	585.834	645.665	749.273	505.319	565.172	766.321	536.295	482.988	740.004	516.83
161	1.6	799.758	1115.69	299.985	848.273	1110.55	243.205	822.323	1113.62	370.728	878.56	973.79	200.777	884.347	980.17	460.941	825.323	935.438	327.126	803.426	698.186	65.793	603.504	732.736	141.286	647.069	758.774	205.839	579.154	781.996	213.746	524.068	731.752	286.765	852.606	709.49	592.263	634.527	735.758	585.811	645.61	749.286	505.305	565.147	766.342	536.294	482.861	740.02	516.808
162	1.61	799.776	1115.72	299.974	848.276	1110.54	243.205	822.303	1113.66	370.716	878.613	973.841	200.765	884.323	980.19	460.94	825.265	935.472	327.137	803.415	698.222	65.7989	603.463	732.731	141.295	647.055	758.8	205.851	579.137	782	213.76	524.03	731.756	286.773	852.593	709.5	592.253	634.449	735.751	585.794	645.532	749.311	505.322	565.141	766.332	536.288	482.827	740.006	516.789
163	1.62	799.851	1115.75	300.005	848.323	1110.53	243.225	822.356	1113.69	370.725	878.632	973.858	200.773	884.336	980.205	460.957	825.246	935.528	327.189	803.432	698.256	65.8167	603.464	732.718	141.307	647.053	758.834	205.831	579.132	781.994	213.797	524.035	731.776	286.823	852.628	709.522	592.263	634.452	735.754	585.816	645.561	749.31	505.361	565.175	766.328	536.304	482.878	739.995	516.815
164	1.63	799.92	1115.76	300.009	848.38	1110.55	243.243	822.425	1113.71	370.745	878.687	973.877	200.781	884.373	980.217	460.97	825.347	935.528	327.196	803.469	698.293	65.8243	603.469	732.704	141.314	647.048	758.836	205.849	579.155	781.984	213.795	524.046	731.804	286.849	852.62	709.528	592.272	634.468	735.755	585.82	645.61	749.309	505.368	565.183	766.326	536.321	482.921	740.008	516.829
165	1.64	799.997	1115.77	299.975	848.413	1110.55	243.22	822.441	1113.71	370.732	878.689	973.875	200.763	884.388	980.239	460.976	825.35	935.567	327.189	803.467	698.297	65.8253	603.479	732.703	141.317	647.042	758.831	205.834	579.133	781.989	213.791	524.025	731.81	286.847	852.614	709.527	592.268	634.46	735.764	585.812	645.598	749.314	505.363	565.168	766.304	536.315	482.902	740.012	516.836
166	1.65	799.946	1115.82	299.955	848.443	1110.56	243.185	822.435	1113.72	370.711	878.662	973.889	200.759	884.416	980.252	460.992	825.347	935.604	327.167	803.453	698.286	65.8256	603.446	732.71	141.296	647.017	758.818	205.821	579.115	781.988	213.782	523.946	731.835	286.825	852.597	709.523	592.259	634.461	735.759	585.805	645.587	749.32	505.359	565.165	766.297	536.303	482.871	740	516.829
167	1.66	799.923	1115.87	299.952	848.498	1110.56	243.154	822.48	1113.74	370.7	878.695	973.922	200.755	884.453	980.263	460.998	825.37	935.622	327.156	803.452	698.276	65.8184	603.499	732.692	141.257	647.046	758.812	205.826	579.146	781.991	213.757	523.966	731.848	286.794	852.602	709.526	592.251	634.491	735.763	585.814	645.595	749.322	505.366	565.197	766.3	536.302	482.901	739.983	516.809
168	1.67	800.005	1115.87	299.945	848.528	1110.57	243.177	822.536	1113.76	370.713	878.707	973.923	200.746	884.473	980.263	460.989	825.46	935.622	327.162	803.457	698.287	65.8091	603.629	732.679	141.222	647.066	758.807	205.845	579.178	781.996	213.737	524.043	731.812	286.78	852.607	709.529	592.261	634.533	735.756	585.814	645.641	749.337	505.355	565.222	766.313	536.294	482.985	739.964	516.802
169	1.68	800.064	1115.88	299.935	848.558	1110.57	243.176	822.556	1113.76	370.727	878.709	973.916	200.744	884.493	980.282	460.993	825.466	935.64	327.164	803.46	698.308	65.8021	603.613	732.68	141.228	647.052	758.794	205.842	579.138	781.997	213.751	524.018	731.825	286.782	852.598	709.519	592.254	634.512	735.734	585.794	645.677	749.317	505.359	565.231	766.317	536.284	482.955	739.967	516.802
170	1.69	800.109	1115.88	299.963	848.53	1110.56	243.178	822.561	1113.77	370.727	878.714	973.928	200.732	884.514	980.295	461	825.4	935.677	327.18	803.461	698.333	65.8162	603.52	732.667	141.232	647.044	758.812	205.825	579.135	782.005	213.744	524.005	731.828	286.791	852.609	709.545	592.254	634.482	735.728	585.783	645.68	749.315	505.367	565.22	766.313	536.285	482.89	739.981	516.793
171	1.7	800.069	1115.89	299.998	848.53	1110.58	243.199	822.549	1113.77	370.755	878.749	973.952	200.733	884.523	980.321	461.004	825.439	935.687	327.17	803.476	698.366	65.8173	603.493	732.674	141.234	647.045	758.834	205.813	579.167	781.994	213.737	524.029	731.798	286.792	852.613	709.569	592.266	634.495	735.734	585.811	645.638	749.323	505.372	565.177	766.318	536.288	482.894	739.99	516.805
172	1.71	800.036	1115.89	300.026	848.526	1110.59	243.219	822.553	1113.77	370.784	878.745	973.975	200.738	884.512	980.32	461.005	825.467	935.708	327.185	803.474	698.376	65.822	603.514	732.683	141.282	647.018	758.864	205.83	579.172	781.991	213.732	523.984	731.815	286.824	852.588	709.585	592.276	634.5	735.763	585.817	645.612	749.335	505.369	565.139	766.326	536.312	482.874	740.017	516.823
173	1.72	800.073	1115.87	300.037	848.523	1110.58	243.247	822.541	1113.75	370.794	878.738	974.004	200.746	884.48	980.303	461.016	825.47	935.716	327.196	803.481	698.39	65.83	603.491	732.669	141.316	647.032	758.845	205.82	579.139	781.99	213.741	524.023	731.808	286.816	852.591	709.613	592.282	634.496	735.753	585.815	645.618	749.316	505.358	565.078	766.321	536.327	482.877	739.995	516.818
174	1.73	800.108	1115.82	300.042	848.515	1110.57	243.273	822.531	1113.72	370.799	878.73	974.033	200.752	884.471	980.308	461.021	825.523	935.709	327.197	803.489	698.406	65.8258	603.452	732.679	141.346	647.014	758.809	205.811	579.113	781.961	213.752	524.08	731.762	286.808	852.597	709.62	592.289	634.478	735.746	585.821	645.597	749.304	505.333	565.092	766.304	536.301	482.838	740.004	516.823
175	1.74	800.123	1115.77	300.072	848.489	1110.57	243.289	822.544	1113.68	370.801	878.761	974.048	200.755	884.485	980.3	461.017	825.577	935.698	327.19	803.475	698.405	65.8024	603.438	732.679	141.331	647	758.79	205.816	579.103	781.95	213.747	524.135	731.716	286.802	852.569	709.606	592.301	634.443	735.744	585.826	645.576	749.303	505.348	565.109	766.308	536.295	482.867	740.007	516.825
176	1.75	800.094	1115.75	300.067	848.494	1110.59	243.279	822.527	1113.65	370.804	878.781	974.069	200.752	884.502	980.297	461.01	825.536	935.699	327.196	803.48	698.399	65.7875	603.477	732.706	141.277	647.012	758.797	205.813	579.082	781.971	213.72	524.1	731.725	286.771	852.576	709.621	592.3	634.495	735.74	585.81	645.601	749.277	505.337	565.169	766.295	536.276	482.916	739.988	516.784
177	1.76	800.004	1115.81	300.076	848.471	1110.61	243.279	822.498	1113.67	370.813	878.767	974.089	200.755	884.496	980.307	461.01	825.444	935.762	327.215	803.481	698.426	65.8024	603.526	732.739	141.229	647	758.841	205.818	579.087	781.99	213.695	524.074	731.745	286.727	852.589	709.623	592.302	634.551	735.755	585.778	645.569	749.308	505.311	565.213	766.291	536.255	482.892	739.991	516.767
178	1.77	799.911	1115.87	300.103	848.408	1110.63	243.299	822.489	1113.7	370.851	878.754	974.111	200.748	884.52	980.338	461.05	825.386	935.831	327.226	803.509	698.491	65.8216	603.525	732.74	141.228	646.971	758.926	205.821	579.079	782.03	213.707	523.983	731.815	286.746	852.575	709.608	592.301	634.515	735.764	585.782	645.605	749.344	505.326	565.224	766.311	536.262	482.912	740.006	516.773
179	1.78	799.781	1115.95	300.19	848.388	1110.64	243.329	822.479	1113.72	370.903	878.749	974.125	200.759	884.539	980.389	461.1	825.291	935.916	327.279	803.536	698.542	65.8402	603.496	732.725	141.247	646.955	758.991	205.852	579.088	782.062	213.741	523.893	731.906	286.805	852.587	709.595	592.308	634.509	735.764	585.809	645.611	749.361	505.361	565.208	766.328	536.279	482.925	739.989	516.795
180	1.79	799.703	1115.96	300.27	848.364	1110.62	243.376	822.472	1113.72	370.955	878.753	974.141	200.78	884.536	980.399	461.138	825.196	935.964	327.333	803.572	698.582	65.8615	603.462	732.704	141.257	646.968	759	205.898	579.081	782.073	213.777	523.809	731.968	286.848	852.61	709.607	592.316	634.5	735.748	585.83	645.632	749.373	505.408	565.201	766.333	536.311	482.986	739.967	516.813
181	1.8	799.787	1115.9	300.325	848.367	1110.6	243.416	822.459	1113.69	370.987	878.733	974.137	200.783	884.506	980.37	461.148	825.261	935.914	327.35	803.57	698.595	65.8403	603.465	732.682	141.282	646.993	758.94	205.896	579.11	782.045	213.784	523.919	731.881	286.856	852.591	709.592	592.32	634.511	735.729	585.856	645.663	749.36	505.446	565.167	766.346	536.343	482.98	739.957	516.824
182	1.81	799.896	1115.82	300.343	848.337	1110.58	243.415	822.444	1113.63	370.995	878.679	974.144	200.793	884.475	980.327	461.133	825.413	935.831	327.331	803.554	698.57	65.7977	603.434	732.634	141.304	647.019	758.832	205.824	579.151	781.974	213.765	523.993	731.787	286.83	852.554	709.569	592.325	634.484	735.725	585.871	645.666	749.319	505.429	565.135	766.328	536.344	482.934	739.961	516.842
183	1.82	799.926	1115.72	300.345	848.335	1110.57	243.412	822.437	1113.58	370.986	878.532	974.048	200.798	884.43	980.275	461.097	825.472	935.756	327.301	803.513	698.527	65.7618	603.443	732.635	141.299	647.015	758.739	205.785	579.183	781.91	213.723	524.062	731.721	286.79	852.544	709.567	592.33	634.473	735.738	585.878	645.663	749.273	505.395	565.112	766.311	536.329	482.882	739.975	516.84
184	1.83	799.904	1115.66	300.338	848.338	1110.56	243.425	822.379	1113.55	370.974	878.349	973.944	200.807	884.414	980.244	461.067	825.499	935.712	327.241	803.5	698.511	65.7189	603.505	732.644	141.249	647.051	758.708	205.735	579.158	781.888	213.669	524.126	731.686	286.741	852.544	709.569	592.329	634.443	735.729	585.851	645.621	749.243	505.343	565.144	766.322	536.303	482.831	740.009	516.799
185	1.84	799.865	1115.65	300.373	848.299	1110.57	243.447	822.347	1113.54	370.997	878.564	974.166	200.81	884.415	980.259	461.077	825.539	935.727	327.212	803.486	698.515	65.7046	603.531	732.656	141.24	647.05	758.726	205.734	579.153	781.886	213.668	524.139	731.686	286.712	852.572	709.587	592.334	634.447	735.755	585.818	645.596	749.262	505.319	565.152	766.313	536.293	482.817	740.038	516.777
186	1.85	799.797	1115.71	300.435	848.266	1110.59	243.482	822.352	1113.56	371.039	878.615	974.233	200.807	884.401	980.305	461.119	825.458	935.821	327.258	803.487	698.568	65.7305	603.561	732.635	141.241	647.034	758.789	205.764	579.144	781.938	213.681	524.123	731.709	286.729	852.573	709.579	592.34	634.46	735.746	585.814	645.569	749.319	505.328	565.134	766.313	536.278	482.859	740.03	516.787
187	1.86	799.641	1115.81	300.497	848.226	1110.61	243.509	822.318	1113.59	371.103	878.619	974.266	200.802	884.384	980.352	461.174	825.224	935.95	327.347	803.534	698.64	65.7794	603.57	732.642	141.252	646.995	758.89	205.826	579.114	782	213.702	524.013	731.801	286.763	852.56	709.541	592.329	634.455	735.724	585.83	645.562	749.372	505.368	565.149	766.318	536.288	482.895	739.997	516.774
188	1.87	799.462	1115.87	300.573	848.215	1110.62	243.552	822.31	1113.6	371.169	878.619	974.28	200.821	884.388	980.384	461.222	825.111	936.029	327.394	803.568	698.69	65.8237	603.52	732.63	141.27	646.966	758.974	205.888	579.099	782.03	213.747	524.002	731.896	286.809	852.592	709.537	592.324	634.48	735.742	585.855	645.596	749.382	505.399	565.169	766.318	536.275	482.92	739.99	516.781
189	1.88	799.464	1115.84	300.624	848.189	1110.63	243.587	822.314	1113.59	371.207	878.638	974.287	200.841	884.437	980.389	461.245	825.135	936.045	327.426	803.594	698.718	65.8318	603.49	732.61	141.278	646.981	759.008	205.892	579.106	782.049	213.769	524.008	731.897	286.84	852.596	709.527	592.325	634.526	735.75	585.872	645.638	749.372	505.423	565.175	766.318	536.307	482.907	740.009	516.823
190	1.89	799.45	1115.8	300.625	848.152	1110.63	243.606	822.306	1113.55	371.203	878.627	974.294	200.845	884.459	980.362	461.24	825.246	935.984	327.421	803.6	698.731	65.8127	603.476	732.665	141.28	647.005	758.975	205.856	579.104	782.041	213.771	523.969	731.866	286.846	852.585	709.524	592.321	634.556	735.741	585.869	645.655	749.356	505.42	565.216	766.311	536.309	482.92	739.997	516.837
191	1.9	799.49	1115.73	300.618	848.137	1110.61	243.623	822.284	1113.48	371.181	878.581	974.316	200.84	884.442	980.312	461.216	825.26	935.94	327.402	803.58	698.73	65.7816	603.408	732.713	141.317	646.983	758.904	205.837	579.107	782	213.755	523.973	731.857	286.824	852.586	709.518	592.304	634.544	735.732	585.868	645.616	749.33	505.406	565.211	766.306	536.299	482.923	739.978	516.789
192	1.91	799.535	1115.63	300.613	848.136	1110.59	243.627	822.262	1113.4	371.165	878.573	974.329	200.853	884.43	980.269	461.198	825.358	935.881	327.361	803.573	698.716	65.7223	603.42	732.689	141.298	647.02	758.833	205.781	579.119	781.961	213.712	524.04	731.764	286.766	852.575	709.542	592.305	634.507	735.726	585.841	645.631	749.302	505.351	565.193	766.297	536.297	482.898	739.984	516.774
193	1.92	799.562	1115.56	300.604	848.135	1110.59	243.626	822.247	1113.34	371.159	878.585	974.359	200.859	884.446	980.223	461.192	825.487	935.805	327.321	803.569	698.702	65.6698	603.444	732.667	141.287	647.029	758.769	205.736	579.121	781.937	213.67	524.114	731.685	286.734	852.553	709.525	592.309	634.487	735.706	585.836	645.629	749.263	505.312	565.147	766.304	536.298	482.906	739.991	516.775
194	1.93	799.569	1115.48	300.615	848.094	1110.57	243.639	822.211	1113.32	371.166	878.549	974.379	200.872	884.42	980.218	461.193	825.499	935.792	327.335	803.558	698.708	65.6468	603.431	732.64	141.272	647.02	758.749	205.731	579.117	781.909	213.657	524.134	731.647	286.751	852.565	709.517	592.302	634.459	735.72	585.819	645.638	749.247	505.314	565.102	766.323	536.311	482.882	740.004	516.779
195	1.94	799.523	1115.48	300.611	848.047	1110.54	243.654	822.176	1113.33	371.186	878.514	974.361	200.884	884.389	980.238	461.214	825.417	935.828	327.378	803.537	698.74	65.6349	603.408	732.649	141.267	647.009	758.781	205.733	579.107	781.919	213.656	524.091	731.702	286.754	852.589	709.521	592.306	634.427	735.736	585.813	645.588	749.286	505.34	565.11	766.316	536.291	482.815	740.019	516.795
196	1.95	799.455	1115.54	300.646	848.029	1110.55	243.681	822.155	1113.37	371.215	878.514	974.354	200.891	884.404	980.281	461.259	825.297	935.878	327.427	803.54	698.78	65.6492	603.376	732.658	141.282	647.001	758.856	205.744	579.106	781.946	213.681	524.049	731.76	286.788	852.566	709.501	592.31	634.425	735.732	585.828	645.595	749.347	505.387	565.111	766.332	536.314	482.845	740.01	516.798
197	1.96	799.341	1115.62	300.721	848.024	1110.58	243.7	822.14	1113.41	371.252	878.515	974.369	200.904	884.461	980.327	461.335	825.208	935.93	327.481	803.572	698.827	65.6872	603.335	732.642	141.314	646.969	758.952	205.8	579.08	782.001	213.746	524.018	731.83	286.824	852.551	709.505	592.307	634.457	735.729	585.866	645.663	749.375	505.427	565.138	766.322	536.346	482.865	740.009	516.822
198	1.97	799.288	1115.69	300.744	847.991	1110.61	243.717	822.137	1113.45	371.273	878.535	974.375	200.911	884.473	980.363	461.385	825.113	935.993	327.496	803.587	698.858	65.7178	603.409	732.644	141.327	646.932	759.011	205.873	579.033	782.059	213.774	523.942	731.901	286.87	852.566	709.48	592.292	634.477	735.731	585.862	645.661	749.388	505.445	565.174	766.313	536.328	482.919	739.977	516.84
199	1.98	799.268	1115.71	300.737	847.963	1110.6	243.69	822.11	1113.46	371.254	878.52	974.359	200.91	884.436	980.375	461.387	825.021	936.032	327.509	803.585	698.87	65.7135	603.404	732.657	141.314	646.912	759.02	205.87	579.04	782.058	213.78	523.93	731.909	286.858	852.568	709.461	592.298	634.488	735.703	585.832	645.619	749.393	505.451	565.164	766.307	536.328	482.939	739.97	516.817
200	1.99	799.212	1115.65	300.701	847.961	1110.57	243.66	822.097	1113.41	371.236	878.513	974.366	200.902	884.406	980.338	461.364	825.038	935.978	327.499	803.559	698.851	65.6823	603.436	732.646	141.243	646.941	758.963	205.805	579.082	782.007	213.742	523.966	731.867	286.817	852.556	709.455	592.306	634.486	735.686	585.84	645.632	749.37	505.413	565.163	766.305	536.324	482.923	739.968	516.806
201	2	799.274	1115.51	300.64	848.01	1110.53	243.631	822.104	1113.35	371.201	878.511	974.37	200.911	884.395	980.277	461.327	825.144	935.899	327.456	803.54	698.799	65.6288	603.48	732.639	141.228	646.987	758.84	205.755	579.122	781.948	213.688	524.063	731.774	286.771	852.549	709.451	592.314	634.503	735.69	585.849	645.652	749.325	505.373	565.173	766.306	536.312	482.93	739.963	516.8
202	2.01	799.365	1115.42	300.595	848.018	1110.51	243.613	822.103	1113.29	371.167	878.504	974.353	200.92	884.387	980.231	461.292	825.235	935.808	327.43	803.557	698.777	65.592	603.497	732.631	141.249	646.975	758.772	205.73	579.142	781.891	213.656	524.118	731.72	286.74	852.541	709.459	592.316	634.501	735.703	585.823	645.637	749.274	505.357	565.174	766.312	536.305	482.927	739.966	516.8
203	2.02	799.457	1115.37	300.548	848.012	1110.49	243.604	822.071	1113.25	371.147	878.502	974.366	200.929	884.378	980.219	461.273	825.233	935.779	327.437	803.551	698.786	65.5803	603.485	732.6	141.255	646.994	758.719	205.698	579.129	781.868	213.651	524.13	731.682	286.723	852.523	709.481	592.313	634.454	735.691	585.821	645.628	749.243	505.35	565.167	766.292	536.292	482.909	739.952	516.793
204	2.03	799.465	1115.39	300.544	848.005	1110.47	243.595	822.048	1113.24	371.133	878.496	974.374	200.926	884.409	980.235	461.275	825.214	935.796	327.451	803.557	698.812	65.5876	603.474	732.602	141.267	646.982	758.758	205.725	579.138	781.891	213.645	524.125	731.657	286.72	852.502	709.498	592.328	634.466	735.711	585.838	645.619	749.266	505.359	565.127	766.298	536.304	482.9	739.952	516.79
205	2.04	799.438	1115.44	300.553	848.044	1110.49	243.591	822.038	1113.28	371.138	878.516	974.401	200.923	884.447	980.286	461.301	825.2	935.832	327.48	803.577	698.86	65.6245	603.445	732.616	141.279	646.95	758.835	205.781	579.108	781.939	213.694	524.09	731.712	286.761	852.519	709.521	592.353	634.47	735.731	585.855	645.591	749.331	505.395	565.144	766.322	536.306	482.883	739.98	516.813
206	2.05	799.391	1115.46	300.55	848.043	1110.51	243.594	822.017	1113.35	371.153	878.549	974.429	200.915	884.469	980.346	461.325	825.175	935.923	327.473	803.589	698.91	65.6543	603.413	732.664	141.275	646.919	758.916	205.84	579.092	781.994	213.74	524.003	731.803	286.812	852.547	709.54	592.363	634.439	735.729	585.843	645.577	749.381	505.434	565.142	766.334	536.31	482.886	740.003	516.838
207	2.06	799.292	1115.53	300.544	848.011	1110.54	243.572	822.01	1113.39	371.141	878.581	974.437	200.895	884.486	980.398	461.34	825.066	935.998	327.482	803.593	698.942	65.6821	603.365	732.68	141.317	646.906	759.004	205.852	579.072	782.047	213.741	524.005	731.848	286.816	852.559	709.557	592.371	634.457	735.747	585.825	645.548	749.411	505.425	565.128	766.337	536.315	482.877	740.008	516.804
208	2.07	799.246	1115.55	300.509	847.992	1110.53	243.548	822.017	1113.4	371.109	878.616	974.437	200.866	884.522	980.407	461.339	825.045	936.013	327.453	803.61	698.939	65.6911	603.4	732.657	141.278	646.904	759.034	205.877	579.047	782.063	213.729	524.01	731.844	286.807	852.569	709.543	592.367	634.495	735.742	585.838	645.557	749.42	505.414	565.165	766.35	536.309	482.873	740.006	516.78
209	2.08	799.319	1115.51	300.477	848.008	1110.49	243.52	822.044	1113.38	371.078	878.642	974.446	200.853	884.537	980.382	461.324	825.132	935.974	327.425	803.617	698.907	65.6827	603.378	732.651	141.267	646.942	759.006	205.84	579.082	782.024	213.707	523.967	731.841	286.8	852.59	709.544	592.35	634.528	735.728	585.843	645.585	749.391	505.413	565.176	766.331	536.288	482.895	740.003	516.793
210	2.09	799.435	1115.41	300.443	848.045	1110.46	243.498	822.056	1113.33	371.039	878.64	974.448	200.861	884.545	980.354	461.3	825.152	935.935	327.422	803.606	698.866	65.6675	603.375	732.637	141.284	646.956	758.939	205.803	579.118	781.983	213.688	524.027	731.809	286.771	852.601	709.547	592.342	634.483	735.72	585.827	645.618	749.355	505.415	565.196	766.305	536.269	482.92	739.979	516.79
211	2.1	799.512	1115.36	300.395	848.037	1110.44	243.467	822.047	1113.3	371.002	878.646	974.419	200.859	884.525	980.327	461.291	825.181	935.913	327.407	803.593	698.826	65.6604	603.375	732.643	141.292	646.979	758.869	205.771	579.119	781.953	213.684	524.074	731.734	286.758	852.609	709.572	592.364	634.451	735.697	585.815	645.662	749.3	505.404	565.186	766.296	536.267	482.925	739.936	516.787
212	2.11	799.512	1115.33	300.361	848.019	1110.41	243.438	822.051	1113.29	370.973	878.653	974.422	200.871	884.504	980.315	461.291	825.151	935.891	327.416	803.58	698.807	65.6534	603.388	732.641	141.296	646.973	758.827	205.784	579.098	781.941	213.686	524.071	731.714	286.752	852.572	709.59	592.377	634.467	735.699	585.817	645.628	749.303	505.382	565.149	766.302	536.295	482.932	739.927	516.796
213	2.12	799.549	1115.3	300.314	848.028	1110.41	243.411	822.055	1113.3	370.955	878.639	974.426	200.862	884.538	980.324	461.286	825.121	935.896	327.44	803.574	698.792	65.6491	603.421	732.647	141.283	646.968	758.812	205.777	579.119	781.943	213.687	524.131	731.72	286.753	852.568	709.586	592.37	634.516	735.727	585.855	645.598	749.318	505.391	565.18	766.307	536.301	482.93	739.946	516.808
214	2.13	799.573	1115.32	300.252	848.017	1110.42	243.385	822.011	1113.34	370.923	878.657	974.451	200.85	884.535	980.366	461.287	825.105	935.917	327.432	803.579	698.802	65.6769	603.44	732.654	141.283	646.927	758.84	205.779	579.117	781.958	213.692	524.105	731.773	286.783	852.583	709.606	592.351	634.514	735.75	585.858	645.596	749.353	505.395	565.144	766.324	536.307	482.925	739.998	516.807
215	2.14	799.465	1115.41	300.22	848	1110.43	243.344	821.947	1113.39	370.882	878.66	974.461	200.827	884.503	980.419	461.279	824.978	935.978	327.439	803.573	698.814	65.6799	603.47	732.649	141.267	646.899	758.89	205.791	579.079	781.999	213.693	524.054	731.791	286.785	852.568	709.613	592.348	634.469	735.761	585.847	645.554	749.387	505.393	565.09	766.336	536.327	482.886	739.987	516.793
216	2.15	799.377	1115.46	300.176	847.977	1110.45	243.325	821.912	1113.42	370.847	878.642	974.447	200.802	884.467	980.461	461.288	824.922	936.025	327.436	803.571	698.843	65.6838	603.497	732.654	141.236	646.897	758.91	205.801	579.054	782.022	213.705	524	731.828	286.791	852.555	709.631	592.341	634.464	735.747	585.828	645.544	749.419	505.403	565.096	766.331	536.326	482.859	739.997	516.791
217	2.16	799.347	1115.48	300.161	847.969	1110.42	243.298	821.887	1113.44	370.831	878.641	974.444	200.809	884.483	980.486	461.299	824.92	936.069	327.443	803.559	698.852	65.7247	603.497	732.644	141.222	646.903	758.931	205.816	579.051	782.026	213.708	524.037	731.818	286.791	852.518	709.628	592.334	634.491	735.74	585.841	645.532	749.428	505.418	565.116	766.325	536.308	482.861	740.035	516.798
218	2.17	799.36	1115.46	300.144	847.938	1110.41	243.268	821.894	1113.43	370.82	878.643	974.424	200.803	884.495	980.489	461.293	824.913	936.061	327.46	803.556	698.836	65.7295	603.455	732.622	141.243	646.927	758.933	205.817	579.074	782.018	213.69	524.042	731.806	286.797	852.507	709.628	592.342	634.476	735.737	585.836	645.577	749.418	505.43	565.11	766.322	536.309	482.773	740.035	516.821
219	2.18	799.37	1115.41	300.102	847.937	1110.4	243.236	821.892	1113.4	370.781	878.644	974.43	200.797	884.508	980.465	461.271	824.862	936.052	327.44	803.559	698.823	65.7121	603.48	732.608	141.234	646.936	758.909	205.814	579.072	782.013	213.684	524.06	731.78	286.808	852.511	709.643	592.36	634.479	735.745	585.832	645.579	749.393	505.412	565.104	766.324	536.311	482.801	739.993	516.806
220	2.19	799.388	1115.33	300.013	847.937	1110.39	243.208	821.872	1113.36	370.712	878.631	974.453	200.784	884.521	980.439	461.228	824.826	936.015	327.397	803.539	698.79	65.69	603.546	732.631	141.178	646.937	758.882	205.767	579.086	781.992	213.652	524.116	731.724	286.782	852.509	709.651	592.352	634.482	735.731	585.824	645.61	749.375	505.379	565.14	766.334	536.283	482.886	739.969	516.766
221	2.2	799.459	1115.27	299.92	847.944	1110.38	243.179	821.843	1113.33	370.657	878.622	974.46	200.783	884.513	980.42	461.199	824.86	935.986	327.358	803.551	698.768	65.6747	603.487	732.638	141.204	646.956	758.862	205.739	579.115	781.956	213.634	524.093	731.718	286.757	852.52	709.669	592.354	634.505	735.737	585.838	645.638	749.35	505.363	565.165	766.328	536.279	482.908	739.957	516.745
222	2.21	799.445	1115.3	299.883	847.947	1110.37	243.153	821.806	1113.34	370.637	878.613	974.48	200.794	884.52	980.442	461.202	824.835	935.989	327.355	803.551	698.76	65.6935	603.436	732.625	141.209	646.964	758.886	205.736	579.131	781.958	213.627	524.076	731.737	286.74	852.552	709.673	592.365	634.502	735.748	585.839	645.642	749.352	505.379	565.134	766.306	536.282	482.909	739.966	516.75
223	2.22	799.365	1115.32	299.875	847.894	1110.4	243.151	821.75	1113.38	370.63	878.599	974.491	200.784	884.507	980.479	461.217	824.72	936.032	327.356	803.55	698.787	65.718	603.424	732.632	141.214	646.928	758.918	205.737	579.098	781.992	213.635	524.012	731.784	286.746	852.58	709.675	592.354	634.529	735.773	585.831	645.624	749.375	505.382	565.162	766.325	536.285	482.92	739.993	516.77
224	2.23	799.294	1115.35	299.855	847.843	1110.41	243.144	821.683	1113.39	370.598	878.576	974.466	200.762	884.497	980.501	461.22	824.613	936.082	327.348	803.562	698.8	65.7037	603.43	732.64	141.202	646.875	758.953	205.774	579.033	782.024	213.64	523.945	731.824	286.729	852.565	709.674	592.34	634.516	735.779	585.816	645.584	749.39	505.377	565.159	766.33	536.259	482.882	739.985	516.776
225	2.24	799.302	1115.32	299.818	847.849	1110.4	243.107	821.649	1113.38	370.572	878.551	974.47	200.766	884.492	980.499	461.231	824.577	936.089	327.37	803.556	698.795	65.7083	603.444	732.634	141.214	646.873	758.946	205.79	579.034	782.02	213.654	523.953	731.811	286.733	852.552	709.668	592.328	634.443	735.77	585.795	645.569	749.398	505.36	565.149	766.321	536.276	482.846	739.98	516.774
226	2.25	799.328	1115.27	299.795	847.834	1110.38	243.09	821.666	1113.35	370.565	878.575	974.45	200.777	884.502	980.493	461.243	824.611	936.039	327.401	803.562	698.772	65.7364	603.456	732.621	141.23	646.862	758.943	205.788	579.055	781.993	213.664	524.007	731.796	286.755	852.539	709.663	592.321	634.459	735.759	585.8	645.586	749.39	505.352	565.118	766.332	536.292	482.884	739.977	516.766
227	2.26	799.269	1115.26	299.798	847.797	1110.36	243.103	821.646	1113.33	370.559	878.59	974.427	200.782	884.475	980.484	461.257	824.571	936.009	327.404	803.561	698.751	65.7669	603.489	732.616	141.221	646.904	758.917	205.779	579.073	781.981	213.655	524.026	731.775	286.756	852.558	709.646	592.329	634.456	735.759	585.803	645.611	749.393	505.37	565.096	766.326	536.288	482.896	739.991	516.747
228	2.27	799.207	1115.22	299.785	847.777	1110.35	243.087	821.57	1113.32	370.538	878.581	974.406	200.776	884.416	980.472	461.257	824.431	936.016	327.413	803.529	698.733	65.7905	603.462	732.637	141.23	646.915	758.905	205.765	579.044	781.988	213.661	524.052	731.766	286.721	852.552	709.633	592.324	634.443	735.742	585.808	645.578	749.392	505.373	565.099	766.327	536.285	482.899	739.971	516.758
229	2.28	799.244	1115.16	299.748	847.76	1110.33	243.058	821.49	1113.3	370.497	878.58	974.416	200.764	884.392	980.449	461.252	824.377	936.019	327.407	803.511	698.7	65.7805	603.47	732.62	141.218	646.911	758.902	205.76	579.03	781.983	213.657	524.051	731.748	286.718	852.535	709.618	592.305	634.469	735.74	585.792	645.595	749.381	505.351	565.109	766.318	536.279	482.86	739.978	516.76
230	2.29	799.281	1115.15	299.693	847.747	1110.32	243.033	821.433	1113.29	370.46	878.588	974.436	200.77	884.424	980.448	461.258	824.405	936.012	327.4	803.527	698.682	65.7764	603.536	732.6	141.159	646.91	758.919	205.77	579.059	781.971	213.645	524.065	731.73	286.74	852.551	709.596	592.286	634.502	735.754	585.785	645.59	749.375	505.353	565.154	766.311	536.258	482.862	739.988	516.747
231	2.3	799.142	1115.19	299.695	847.703	1110.32	243.031	821.398	1113.3	370.453	878.589	974.42	200.779	884.395	980.468	461.281	824.355	936.031	327.38	803.534	698.704	65.8098	603.54	732.595	141.17	646.931	758.925	205.762	579.048	781.993	213.656	523.977	731.817	286.747	852.538	709.595	592.282	634.498	735.733	585.789	645.549	749.39	505.362	565.146	766.326	536.274	482.879	739.986	516.739
232	2.31	799.024	1115.21	299.704	847.647	1110.33	243.021	821.347	1113.3	370.446	878.594	974.42	200.785	884.345	980.476	461.295	824.225	936.084	327.4	803.533	698.702	65.8427	603.515	732.593	141.181	646.906	758.935	205.79	579.055	782.013	213.647	523.906	731.879	286.756	852.523	709.589	592.307	634.454	735.713	585.795	645.533	749.388	505.373	565.149	766.339	536.294	482.847	739.973	516.743
233	2.32	799.04	1115.18	299.694	847.656	1110.33	243	821.321	1113.28	370.429	878.591	974.381	200.781	884.37	980.476	461.3	824.25	936.041	327.419	803.544	698.688	65.8375	603.56	732.581	141.179	646.903	758.93	205.795	579.062	782.011	213.644	523.976	731.829	286.758	852.516	709.585	592.332	634.45	735.706	585.784	645.607	749.374	505.392	565.192	766.311	536.274	482.929	739.945	516.761
234	2.33	799.118	1115.08	299.649	847.665	1110.32	243.002	821.318	1113.25	370.408	878.569	974.362	200.786	884.401	980.452	461.299	824.261	936.004	327.431	803.556	698.672	65.8266	603.513	732.594	141.207	646.914	758.934	205.789	579.059	781.996	213.648	524.05	731.774	286.76	852.517	709.571	592.341	634.475	735.707	585.792	645.658	749.354	505.378	565.171	766.287	536.249	482.955	739.925	516.766
235	2.34	799.083	1115.08	299.617	847.638	1110.31	243.009	821.25	1113.24	370.379	878.532	974.358	200.803	884.382	980.442	461.295	824.248	935.979	327.429	803.556	698.664	65.8133	603.476	732.589	141.224	646.89	758.915	205.805	579.038	781.97	213.663	524.101	731.759	286.766	852.514	709.587	592.348	634.455	735.7	585.797	645.627	749.359	505.386	565.13	766.296	536.271	482.905	739.92	516.763
236	2.35	799.048	1115.08	299.62	847.588	1110.31	243.005	821.183	1113.24	370.376	878.521	974.349	200.81	884.333	980.447	461.305	824.187	935.971	327.441	803.52	698.643	65.8262	603.484	732.616	141.214	646.884	758.901	205.794	578.99	781.986	213.67	524.04	731.8	286.765	852.529	709.587	592.359	634.444	735.707	585.802	645.558	749.376	505.396	565.128	766.311	536.275	482.838	739.958	516.788
237	2.36	799.044	1115.01	299.602	847.542	1110.3	242.994	821.188	1113.23	370.368	878.536	974.329	200.816	884.344	980.449	461.31	824.136	935.969	327.454	803.525	698.635	65.8126	603.443	732.626	141.217	646.91	758.907	205.769	579.01	782	213.641	523.979	731.812	286.763	852.507	709.595	592.342	634.454	735.71	585.791	645.557	749.379	505.376	565.144	766.309	536.265	482.897	739.965	516.775
238	2.37	799.107	1114.94	299.57	847.564	1110.27	242.981	821.185	1113.23	370.349	878.543	974.323	200.831	884.375	980.448	461.31	824.158	935.939	327.444	803.542	698.621	65.8103	603.446	732.617	141.215	646.908	758.89	205.761	579.05	781.992	213.625	524.031	731.768	286.746	852.512	709.633	592.366	634.451	735.714	585.805	645.569	749.369	505.384	565.157	766.325	536.269	482.853	739.979	516.759
239	2.38	799.114	1114.92	299.553	847.562	1110.28	242.982	821.166	1113.24	370.338	878.549	974.291	200.845	884.365	980.429	461.324	824.172	935.918	327.44	803.521	698.591	65.8333	603.443	732.618	141.24	646.884	758.877	205.775	579.04	781.99	213.635	524.094	731.738	286.73	852.515	709.632	592.385	634.441	735.71	585.808	645.58	749.357	505.397	565.116	766.329	536.289	482.823	739.985	516.76
240	2.39	799.066	1114.93	299.562	847.531	1110.29	242.989	821.15	1113.24	370.322	878.529	974.248	200.853	884.38	980.44	461.351	824.139	935.912	327.46	803.529	698.589	65.8515	603.447	732.632	141.228	646.868	758.897	205.806	579.015	781.986	213.641	524.032	731.758	286.749	852.507	709.635	592.39	634.416	735.71	585.794	645.588	749.364	505.392	565.098	766.322	536.289	482.866	739.96	516.752
241	2.4	799.002	1114.99	299.555	847.524	1110.32	243.005	821.154	1113.28	370.321	878.544	974.224	200.861	884.412	980.481	461.382	824.044	935.965	327.497	803.522	698.584	65.8758	603.467	732.655	141.185	646.868	758.926	205.832	578.994	782.013	213.646	524.005	731.793	286.765	852.505	709.654	592.413	634.469	735.711	585.799	645.587	749.392	505.391	565.121	766.322	536.292	482.885	739.961	516.746
242	2.41	798.907	1115.08	299.548	847.528	1110.33	242.985	821.134	1113.31	370.313	878.546	974.191	200.884	884.402	980.526	461.397	823.971	936	327.538	803.531	698.57	65.9322	603.493	732.663	141.16	646.862	758.974	205.868	579.001	782.048	213.649	523.998	731.83	286.767	852.509	709.666	592.438	634.466	735.715	585.808	645.583	749.426	505.401	565.093	766.328	536.309	482.92	739.964	516.742
243	2.42	798.876	1115.14	299.524	847.518	1110.33	242.967	821.09	1113.35	370.302	878.573	974.159	200.906	884.378	980.556	461.42	823.921	936.032	327.556	803.551	698.564	65.9731	603.496	732.672	141.186	646.885	759.006	205.879	578.987	782.072	213.657	523.922	731.886	286.758	852.495	709.659	592.429	634.446	735.707	585.829	645.583	749.443	505.415	565.097	766.313	536.294	482.922	739.969	516.722
244	2.43	798.851	1115.16	299.506	847.507	1110.33	242.957	821.084	1113.37	370.293	878.589	974.143	200.896	884.349	980.56	461.427	823.848	936.027	327.558	803.546	698.535	65.9893	603.484	732.664	141.208	646.886	759.011	205.898	578.99	782.07	213.663	523.881	731.891	286.76	852.495	709.661	592.426	634.501	735.724	585.86	645.551	749.439	505.43	565.119	766.325	536.287	482.928	739.983	516.733
245	2.44	798.887	1115.13	299.45	847.542	1110.31	242.913	821.073	1113.35	370.245	878.594	974.104	200.898	884.332	980.534	461.417	823.847	935.994	327.553	803.524	698.476	65.9839	603.48	732.65	141.212	646.895	758.949	205.865	579.039	782.03	213.638	523.99	731.796	286.725	852.473	709.665	592.44	634.558	735.755	585.841	645.568	749.418	505.428	565.123	766.327	536.298	482.955	739.957	516.738
246	2.45	798.993	1115.06	299.398	847.605	1110.3	242.883	821.067	1113.31	370.201	878.618	974.056	200.908	884.345	980.487	461.389	823.932	935.924	327.531	803.541	698.421	65.9758	603.511	732.635	141.204	646.946	758.842	205.792	579.058	781.981	213.625	524.043	731.75	286.725	852.49	709.665	592.441	634.506	735.73	585.825	645.604	749.371	505.425	565.108	766.324	536.321	482.929	739.955	516.75
247	2.46	799.054	1115.01	299.382	847.623	1110.31	242.875	821.049	1113.3	370.182	878.649	974.025	200.898	884.346	980.463	461.381	823.999	935.859	327.535	803.572	698.403	65.9739	603.52	732.615	141.218	646.984	758.793	205.762	579.048	781.953	213.642	524.036	731.741	286.759	852.499	709.67	592.435	634.426	735.704	585.841	645.602	749.345	505.423	565.107	766.328	536.342	482.931	739.939	516.771
248	2.47	799.088	1115.02	299.38	847.635	1110.31	242.888	821.047	1113.32	370.182	878.676	974.008	200.89	884.336	980.47	461.388	823.927	935.86	327.55	803.574	698.374	65.9935	603.504	732.599	141.237	646.971	758.769	205.784	579.016	781.959	213.662	524.1	731.707	286.754	852.522	709.669	592.43	634.415	735.701	585.846	645.6	749.35	505.422	565.093	766.312	536.343	482.906	739.947	516.772
249	2.48	799.129	1115.09	299.363	847.676	1110.31	242.879	821.058	1113.34	370.169	878.664	973.989	200.89	884.343	980.491	461.375	823.906	935.862	327.517	803.544	698.348	66.0004	603.476	732.59	141.241	646.957	758.783	205.781	579.019	781.96	213.648	524.125	731.698	286.737	852.506	709.651	592.437	634.396	735.713	585.856	645.582	749.366	505.424	565.091	766.301	536.327	482.866	739.962	516.758
250	2.49	799.072	1115.16	299.341	847.678	1110.33	242.872	821.073	1113.36	370.151	878.659	973.953	200.877	884.371	980.528	461.368	823.891	935.879	327.504	803.556	698.359	66.0013	603.472	732.595	141.204	646.953	758.829	205.773	579.084	781.944	213.627	524.072	731.748	286.743	852.501	709.668	592.433	634.394	735.697	585.827	645.556	749.394	505.417	565.064	766.287	536.306	482.866	739.96	516.758
251	2.5	799.084	1115.25	299.344	847.705	1110.36	242.88	821.102	1113.4	370.154	878.683	973.927	200.869	884.403	980.576	461.398	823.865	935.907	327.509	803.563	698.368	66.0147	603.508	732.617	141.191	646.927	758.888	205.819	579.074	781.976	213.637	524.054	731.782	286.757	852.5	709.678	592.427	634.437	735.703	585.82	645.533	749.422	505.409	565.095	766.297	536.286	482.931	739.96	516.755
252	2.51	799.065	1115.36	299.339	847.733	1110.4	242.885	821.134	1113.45	370.168	878.698	973.928	200.873	884.417	980.618	461.412	823.792	935.968	327.514	803.581	698.387	66.0504	603.509	732.629	141.198	646.88	758.94	205.871	579.051	782.025	213.662	523.985	731.836	286.798	852.479	709.69	592.422	634.451	735.717	585.832	645.529	749.452	505.44	565.155	766.313	536.279	482.955	739.96	516.76
253	2.52	799.073	1115.42	299.321	847.745	1110.42	242.871	821.147	1113.49	370.155	878.669	973.925	200.868	884.42	980.619	461.394	823.723	935.966	327.506	803.587	698.373	66.0658	603.466	732.639	141.206	646.878	758.97	205.849	579.029	782.056	213.645	523.95	731.875	286.788	852.466	709.716	592.424	634.465	735.737	585.819	645.532	749.449	505.443	565.155	766.333	536.274	482.892	739.973	516.752
254	2.53	799.132	1115.43	299.293	847.765	1110.45	242.839	821.19	1113.51	370.134	878.691	973.922	200.858	884.425	980.603	461.357	823.767	935.921	327.492	803.589	698.348	66.0555	603.494	732.66	141.186	646.902	758.958	205.835	579.005	782.052	213.632	523.984	731.844	286.733	852.496	709.736	592.42	634.474	735.72	585.794	645.57	749.429	505.416	565.151	766.336	536.284	482.913	739.957	516.722
255	2.54	799.143	1115.44	299.308	847.784	1110.47	242.82	821.223	1113.51	370.107	878.7	973.892	200.859	884.443	980.594	461.345	823.775	935.885	327.499	803.573	698.309	66.045	603.506	732.666	141.175	646.902	758.945	205.812	578.987	782.038	213.644	523.979	731.846	286.757	852.493	709.761	592.426	634.429	735.729	585.797	645.598	749.412	505.422	565.182	766.334	536.304	482.977	739.97	516.718
256	2.55	799.143	1115.46	299.3	847.804	1110.48	242.805	821.207	1113.51	370.083	878.694	973.88	200.857	884.402	980.567	461.332	823.634	935.871	327.496	803.537	698.241	66.0277	603.471	732.674	141.173	646.89	758.915	205.802	579.01	782.019	213.632	523.949	731.84	286.783	852.475	709.755	592.43	634.439	735.715	585.799	645.549	749.402	505.422	565.182	766.323	536.299	482.996	739.954	516.735
257	2.56	799.182	1115.46	299.27	847.825	1110.47	242.8	821.192	1113.48	370.025	878.541	973.727	200.859	884.383	980.526	461.295	823.507	935.837	327.481	803.498	698.156	65.9971	603.477	732.654	141.16	646.888	758.868	205.785	578.993	781.999	213.613	523.993	731.769	286.748	852.478	709.763	592.424	634.46	735.693	585.807	645.523	749.378	505.4	565.176	766.285	536.284	482.955	739.924	516.73
258	2.57	799.221	1115.46	299.234	847.828	1110.46	242.78	821.218	1113.46	369.983	878.344	973.559	200.858	884.388	980.495	461.246	823.545	935.767	327.445	803.469	698.099	65.9655	603.54	732.63	141.143	646.902	758.824	205.753	579.005	781.994	213.583	524.061	731.711	286.726	852.502	709.773	592.41	634.49	735.692	585.813	645.586	749.352	505.387	565.176	766.26	536.265	482.927	739.923	516.732
259	2.58	799.268	1115.49	299.216	847.824	1110.46	242.765	821.243	1113.48	369.975	878.448	973.604	200.832	884.41	980.505	461.227	823.505	935.76	327.44	803.443	698.051	65.9678	603.517	732.621	141.174	646.895	758.83	205.755	578.994	781.992	213.589	524.021	731.742	286.747	852.502	709.765	592.4	634.501	735.706	585.803	645.603	749.349	505.397	565.165	766.292	536.276	482.941	739.927	516.743
260	2.59	799.248	1115.54	299.217	847.818	1110.49	242.747	821.228	1113.52	369.971	878.357	973.493	200.832	884.436	980.55	461.239	823.44	935.786	327.437	803.424	698.035	65.9875	603.479	732.637	141.178	646.887	758.856	205.776	578.962	782.007	213.623	524.026	731.76	286.734	852.498	709.765	592.394	634.493	735.727	585.808	645.566	749.363	505.393	565.163	766.288	536.282	482.925	739.933	516.738
261	2.6	799.247	1115.62	299.181	847.855	1110.52	242.726	821.192	1113.58	369.943	878.598	973.655	200.781	884.443	980.62	461.241	823.409	935.824	327.413	803.472	698.052	66.0303	603.504	732.636	141.141	646.885	758.911	205.798	578.932	782.047	213.63	523.994	731.808	286.733	852.492	709.776	592.384	634.453	735.723	585.782	645.522	749.407	505.393	565.121	766.281	536.271	482.903	739.98	516.706
262	2.61	799.193	1115.68	299.182	847.83	1110.55	242.725	821.194	1113.63	369.94	878.659	973.679	200.749	884.461	980.694	461.245	823.329	935.866	327.419	803.501	698.053	66.0546	603.535	732.642	141.133	646.891	758.979	205.807	578.899	782.088	213.642	523.946	731.87	286.743	852.498	709.8	592.373	634.47	735.731	585.775	645.525	749.444	505.406	565.121	766.284	536.259	482.898	739.988	516.713
263	2.62	799.117	1115.72	299.201	847.811	1110.55	242.719	821.195	1113.67	369.956	878.521	973.571	200.775	884.471	980.742	461.248	823.277	935.888	327.438	803.523	698.021	66.085	603.57	732.633	141.141	646.892	759.005	205.815	578.908	782.089	213.663	523.961	731.868	286.764	852.509	709.823	592.362	634.464	735.729	585.802	645.526	749.461	505.422	565.121	766.302	536.285	482.883	739.989	516.753
264	2.63	799.131	1115.73	299.183	847.828	1110.55	242.676	821.209	1113.66	369.957	878.335	973.425	200.793	884.46	980.744	461.216	823.256	935.853	327.424	803.526	697.974	66.0953	603.567	732.616	141.135	646.931	758.975	205.786	578.939	782.069	213.666	523.966	731.859	286.756	852.508	709.846	592.354	634.456	735.732	585.807	645.523	749.457	505.43	565.131	766.309	536.298	482.881	739.984	516.746
265	2.64	799.155	1115.69	299.129	847.834	1110.52	242.624	821.229	1113.61	369.909	878.457	973.445	200.745	884.47	980.705	461.165	823.284	935.806	327.364	803.48	697.883	66.0546	603.598	732.571	141.097	646.951	758.899	205.769	578.973	782.026	213.638	524.002	731.802	286.74	852.478	709.839	592.334	634.466	735.739	585.769	645.575	749.423	505.407	565.15	766.307	536.29	482.936	739.94	516.732
266	2.65	799.173	1115.64	299.094	847.842	1110.48	242.6	821.255	1113.56	369.851	878.239	973.217	200.715	884.486	980.66	461.106	823.291	935.745	327.326	803.399	697.777	66.0085	603.647	732.544	141.06	646.95	758.817	205.759	578.991	781.99	213.596	524.041	731.75	286.702	852.482	709.856	592.331	634.476	735.736	585.772	645.606	749.389	505.387	565.144	766.309	536.277	482.969	739.925	516.726
267	2.66	799.193	1115.6	299.072	847.865	1110.47	242.59	821.223	1113.53	369.82	878.193	973.134	200.684	884.471	980.628	461.066	823.272	935.701	327.303	803.366	697.707	65.9834	603.649	732.56	141.07	646.915	758.777	205.759	579.009	781.963	213.558	524.089	731.697	286.678	852.489	709.895	592.356	634.456	735.733	585.784	645.601	749.364	505.377	565.15	766.3	536.294	482.959	739.936	516.731
268	2.67	799.097	1115.59	299.078	847.836	1110.48	242.595	821.189	1113.53	369.808	878.206	973.106	200.667	884.465	980.642	461.067	823.126	935.684	327.317	803.388	697.681	66.0031	603.655	732.573	141.085	646.937	758.764	205.74	579.009	781.957	213.578	524.148	731.664	286.68	852.516	709.914	592.354	634.468	735.727	585.782	645.594	749.356	505.36	565.123	766.291	536.288	482.934	739.952	516.742
269	2.68	799.063	1115.6	299.054	847.798	1110.5	242.588	821.164	1113.56	369.803	878.201	973.102	200.672	884.471	980.668	461.066	823.05	935.68	327.327	803.417	697.667	66.0199	603.637	732.594	141.126	646.938	758.807	205.76	579.003	781.982	213.588	524.149	731.709	286.674	852.541	709.916	592.345	634.493	735.761	585.786	645.609	749.374	505.376	565.15	766.268	536.27	482.964	739.933	516.716
270	2.69	799.088	1115.61	299.037	847.756	1110.53	242.578	821.125	1113.58	369.802	878.167	973.108	200.692	884.466	980.698	461.065	823.015	935.689	327.328	803.427	697.658	66.0361	603.581	732.624	141.162	646.925	758.862	205.791	579.001	782.008	213.611	524.063	731.764	286.696	852.502	709.921	592.333	634.507	735.758	585.768	645.607	749.386	505.392	565.179	766.26	536.254	482.969	739.946	516.697
271	2.7	799.039	1115.63	299.056	847.744	1110.55	242.571	821.1	1113.61	369.805	878.142	973.093	200.692	884.472	980.726	461.07	822.979	935.704	327.317	803.451	697.648	66.0656	603.592	732.629	141.14	646.897	758.912	205.824	578.951	782.039	213.646	524.004	731.799	286.707	852.491	709.933	592.337	634.51	735.756	585.782	645.602	749.408	505.391	565.16	766.294	536.279	482.924	739.965	516.706
272	2.71	799.016	1115.68	299.067	847.713	1110.57	242.587	821.083	1113.65	369.821	878.144	973.094	200.694	884.479	980.753	461.093	822.897	935.721	327.333	803.494	697.668	66.0888	603.573	732.636	141.148	646.882	758.949	205.867	578.944	782.068	213.647	523.908	731.871	286.731	852.486	709.922	592.339	634.508	735.768	585.805	645.586	749.429	505.396	565.162	766.32	536.283	482.924	739.954	516.711
273	2.72	798.936	1115.7	299.076	847.662	1110.58	242.599	821.068	1113.66	369.822	878.127	973.092	200.714	884.457	980.77	461.099	822.804	935.722	327.341	803.517	697.666	66.0998	603.583	732.654	141.137	646.896	758.971	205.888	578.96	782.09	213.664	523.938	731.863	286.749	852.492	709.908	592.347	634.493	735.756	585.791	645.562	749.445	505.408	565.159	766.338	536.269	482.928	739.953	516.739
274	2.73	798.93	1115.69	299.064	847.672	1110.58	242.598	821.06	1113.65	369.831	878.115	973.056	200.717	884.402	980.747	461.093	822.764	935.681	327.344	803.507	697.64	66.1144	603.605	732.64	141.15	646.898	758.959	205.876	578.976	782.095	213.643	523.981	731.844	286.744	852.492	709.904	592.353	634.473	735.744	585.787	645.525	749.449	505.414	565.145	766.333	536.261	482.897	739.976	516.73
275	2.74	798.983	1115.66	299.056	847.647	1110.59	242.605	821.054	1113.63	369.835	878.086	973.021	200.708	884.38	980.705	461.081	822.753	935.629	327.344	803.507	697.585	66.1249	603.557	732.63	141.159	646.88	758.926	205.871	578.992	782.057	213.613	524	731.813	286.745	852.494	709.91	592.344	634.477	735.745	585.783	645.536	749.423	505.397	565.14	766.321	536.272	482.884	739.952	516.729
276	2.75	798.962	1115.64	299.081	847.64	1110.59	242.612	821.054	1113.6	369.843	878.076	972.998	200.7	884.387	980.656	461.068	822.775	935.568	327.337	803.484	697.541	66.1085	603.564	732.625	141.152	646.907	758.86	205.82	578.991	782.015	213.61	524.062	731.765	286.749	852.508	709.892	592.334	634.472	735.726	585.773	645.542	749.384	505.379	565.129	766.297	536.268	482.883	739.947	516.744
277	2.76	799.058	1115.59	299.114	847.635	1110.59	242.619	821.062	1113.56	369.86	878.097	972.968	200.69	884.376	980.609	461.056	822.774	935.506	327.35	803.452	697.492	66.0988	603.576	732.633	141.128	646.92	758.796	205.783	578.998	781.998	213.604	524.119	731.718	286.738	852.514	709.882	592.344	634.438	735.698	585.752	645.583	749.342	505.378	565.132	766.288	536.275	482.891	739.957	516.738
278	2.77	799.085	1115.57	299.129	847.653	1110.57	242.635	821.078	1113.53	369.878	878.102	972.926	200.664	884.38	980.577	461.047	822.769	935.454	327.352	803.457	697.44	66.082	603.61	732.627	141.096	646.958	758.742	205.774	579.022	781.967	213.594	524.096	731.7	286.705	852.478	709.85	592.332	634.432	735.702	585.759	645.606	749.309	505.358	565.123	766.287	536.279	482.897	739.968	516.734
279	2.78	799.051	1115.58	299.129	847.638	1110.57	242.658	821.075	1113.52	369.917	878.109	972.913	200.681	884.396	980.571	461.054	822.755	935.448	327.373	803.473	697.415	66.0925	603.558	732.634	141.105	647.004	758.755	205.753	579.054	781.96	213.591	524.12	731.675	286.708	852.496	709.835	592.338	634.433	735.705	585.786	645.619	749.302	505.334	565.149	766.279	536.273	482.918	739.94	516.74
280	2.79	798.917	1115.67	299.176	847.621	1110.62	242.695	821.076	1113.57	369.977	878.104	972.944	200.708	884.402	980.615	461.092	822.685	935.493	327.406	803.506	697.44	66.1257	603.543	732.649	141.13	646.997	758.799	205.748	579.041	781.999	213.605	524.084	731.716	286.706	852.524	709.85	592.337	634.481	735.721	585.8	645.619	749.347	505.358	565.172	766.296	536.251	482.928	739.953	516.739
281	2.8	798.784	1115.79	299.252	847.614	1110.66	242.729	821.051	1113.63	370.043	878.071	972.988	200.736	884.373	980.678	461.133	822.597	935.532	327.429	803.529	697.493	66.1664	603.64	732.654	141.1	646.956	758.89	205.795	578.973	782.061	213.636	523.983	731.818	286.726	852.511	709.865	592.335	634.496	735.733	585.81	645.576	749.405	505.397	565.138	766.326	536.262	482.932	739.956	516.745
282	2.81	798.81	1115.84	299.293	847.629	1110.69	242.753	821.034	1113.66	370.084	878.031	972.982	200.775	884.359	980.71	461.151	822.566	935.541	327.452	803.538	697.529	66.1793	603.672	732.64	141.073	646.925	758.95	205.861	578.955	782.083	213.664	523.908	731.862	286.757	852.5	709.858	592.327	634.481	735.747	585.777	645.527	749.446	505.403	565.1	766.333	536.271	482.906	739.98	516.757
283	2.82	798.857	1115.85	299.334	847.656	1110.7	242.801	821.062	1113.67	370.136	878.018	972.952	200.788	884.367	980.711	461.163	822.588	935.498	327.457	803.555	697.543	66.1886	603.622	732.624	141.105	646.937	758.983	205.915	578.976	782.077	213.646	523.88	731.863	286.755	852.497	709.85	592.33	634.478	735.734	585.762	645.521	749.449	505.387	565.096	766.331	536.274	482.864	739.983	516.715
284	2.83	798.861	1115.84	299.391	847.692	1110.7	242.846	821.108	1113.65	370.181	878.038	972.945	200.798	884.359	980.691	461.168	822.603	935.451	327.464	803.538	697.494	66.1898	603.583	732.643	141.139	646.935	758.943	205.92	579	782.052	213.67	523.922	731.831	286.765	852.507	709.844	592.336	634.453	735.72	585.78	645.533	749.444	505.394	565.137	766.331	536.282	482.869	739.976	516.732
285	2.84	798.916	1115.81	299.421	847.709	1110.71	242.868	821.144	1113.62	370.214	878.051	972.92	200.801	884.365	980.647	461.169	822.588	935.413	327.475	803.505	697.421	66.1903	603.571	732.684	141.159	646.963	758.861	205.871	579.019	782.016	213.69	524.046	731.781	286.77	852.483	709.816	592.347	634.437	735.721	585.808	645.544	749.433	505.418	565.118	766.329	536.303	482.856	739.99	516.764
286	2.85	799.097	1115.73	299.418	847.742	1110.71	242.871	821.179	1113.59	370.219	878.076	972.888	200.787	884.336	980.58	461.153	822.604	935.354	327.474	803.512	697.369	66.1932	603.59	732.691	141.164	647.014	758.78	205.822	579.026	782	213.67	524.109	731.73	286.755	852.495	709.811	592.365	634.432	735.732	585.82	645.561	749.404	505.415	565.068	766.321	536.308	482.882	739.993	516.778
287	2.86	799.193	1115.68	299.426	847.774	1110.71	242.875	821.215	1113.56	370.243	878.067	972.843	200.785	884.35	980.523	461.135	822.632	935.286	327.472	803.542	697.322	66.1941	603.596	732.688	141.143	647.008	758.732	205.818	579.046	781.996	213.657	524.132	731.691	286.737	852.501	709.808	592.371	634.421	735.712	585.817	645.572	749.372	505.39	565.091	766.329	536.309	482.928	739.964	516.759
288	2.87	799.193	1115.67	299.457	847.797	1110.71	242.914	821.243	1113.58	370.277	878.093	972.801	200.783	884.376	980.513	461.143	822.574	935.263	327.49	803.551	697.304	66.2084	603.594	732.697	141.136	647.011	758.741	205.82	579.055	781.99	213.641	524.136	731.673	286.73	852.511	709.815	592.393	634.435	735.706	585.818	645.552	749.37	505.403	565.111	766.315	536.319	482.945	739.951	516.76
289	2.88	799.118	1115.76	299.507	847.84	1110.73	242.946	821.282	1113.6	370.305	878.112	972.79	200.795	884.418	980.524	461.164	822.519	935.256	327.525	803.594	697.305	66.2483	603.664	732.717	141.134	647.01	758.762	205.854	579.042	781.999	213.652	524.104	731.712	286.736	852.527	709.791	592.404	634.459	735.698	585.828	645.599	749.368	505.425	565.149	766.299	536.316	482.951	739.955	516.767
290	2.89	799.047	1115.86	299.529	847.845	1110.76	242.952	821.305	1113.64	370.33	878.117	972.784	200.803	884.433	980.541	461.188	822.503	935.248	327.551	803.645	697.31	66.3024	603.625	732.716	141.16	647.017	758.806	205.861	579.027	782.033	213.684	524.095	731.739	286.747	852.527	709.78	592.401	634.473	735.678	585.819	645.636	749.375	505.435	565.172	766.29	536.315	482.982	739.928	516.77
291	2.9	799.022	1115.93	299.546	847.843	1110.8	242.976	821.325	1113.69	370.366	878.107	972.809	200.852	884.432	980.586	461.231	822.45	935.264	327.589	803.684	697.315	66.3395	603.625	732.693	141.165	647	758.868	205.899	579.009	782.072	213.697	524.014	731.805	286.776	852.503	709.777	592.413	634.498	735.673	585.829	645.606	749.395	505.453	565.173	766.299	536.33	482.974	739.944	516.782
292	2.91	799.091	1115.97	299.568	847.864	1110.81	242.99	821.33	1113.74	370.382	878.192	972.889	200.86	884.424	980.624	461.262	822.397	935.274	327.626	803.698	697.303	66.3738	603.608	732.696	141.194	646.952	758.92	205.951	579.013	782.085	213.736	523.923	731.868	286.784	852.481	709.766	592.419	634.529	735.702	585.834	645.609	749.417	505.484	565.137	766.306	536.327	482.943	739.961	516.783
293	2.92	799.029	1116.01	299.573	847.86	1110.81	242.988	821.334	1113.76	370.379	878.35	972.995	200.832	884.412	980.649	461.27	822.336	935.258	327.638	803.696	697.285	66.3818	603.658	732.697	141.178	646.978	758.916	205.95	578.976	782.079	213.746	523.907	731.874	286.795	852.495	709.777	592.412	634.52	735.722	585.828	645.571	749.431	505.484	565.122	766.307	536.313	482.939	739.957	516.768
294	2.93	799.017	1116.02	299.54	847.869	1110.81	242.972	821.325	1113.77	370.347	878.138	972.843	200.87	884.362	980.65	461.245	822.324	935.22	327.661	803.7	697.252	66.3928	603.676	732.709	141.17	647.031	758.894	205.941	578.977	782.068	213.732	523.944	731.85	286.787	852.494	709.789	592.413	634.497	735.714	585.832	645.534	749.441	505.457	565.111	766.316	536.318	482.931	739.973	516.768
295	2.94	799.142	1115.95	299.487	847.895	1110.8	242.956	821.314	1113.77	370.329	878.084	972.779	200.873	884.333	980.643	461.244	822.377	935.156	327.651	803.676	697.202	66.3935	603.646	732.729	141.184	647.045	758.847	205.914	578.976	782.052	213.741	523.986	731.791	286.788	852.457	709.805	592.426	634.479	735.698	585.859	645.53	749.434	505.459	565.068	766.35	536.335	482.874	740.003	516.789
296	2.95	799.198	1115.93	299.462	847.935	1110.81	242.944	821.328	1113.76	370.322	878.051	972.725	200.87	884.332	980.625	461.252	822.401	935.097	327.647	803.622	697.142	66.3779	603.595	732.729	141.25	647.02	758.785	205.894	579.001	782.024	213.733	524.071	731.741	286.8	852.44	709.845	592.435	634.436	735.699	585.855	645.539	749.437	505.484	565.079	766.361	536.36	482.852	740	516.782
297	2.96	799.179	1115.92	299.433	847.926	1110.8	242.933	821.353	1113.74	370.304	878.033	972.688	200.856	884.312	980.595	461.228	822.391	935.026	327.648	803.598	697.092	66.379	603.619	732.744	141.251	647.017	758.748	205.885	579.025	781.999	213.716	524.114	731.683	286.774	852.458	709.862	592.43	634.398	735.696	585.837	645.526	749.43	505.491	565.105	766.338	536.346	482.861	739.984	516.771
298	2.97	799.191	1115.91	299.393	847.939	1110.79	242.906	821.332	1113.73	370.269	878.034	972.668	200.851	884.31	980.598	461.212	822.332	935.024	327.639	803.61	697.088	66.3866	603.678	732.749	141.217	647.026	758.732	205.863	579.015	782.005	213.706	524.08	731.696	286.738	852.462	709.853	592.446	634.435	735.692	585.816	645.536	749.418	505.464	565.128	766.304	536.318	482.889	739.963	516.762
299	2.98	799.123	1115.99	299.41	847.941	1110.81	242.907	821.305	1113.75	370.263	878.03	972.679	200.853	884.317	980.625	461.229	822.245	935.034	327.662	803.645	697.1	66.4167	603.634	732.742	141.22	646.996	758.775	205.904	578.988	782.031	213.714	524.035	731.695	286.758	852.446	709.841	592.465	634.482	735.695	585.852	645.58	749.413	505.469	565.127	766.287	536.334	482.937	739.958	516.769
300	2.99	799.11	1116.02	299.471	847.908	1110.82	242.923	821.318	1113.79	370.308	878.037	972.697	200.876	884.374	980.66	461.261	822.222	935.034	327.705	803.666	697.11	66.4573	603.573	732.733	141.289	646.969	758.836	205.988	578.961	782.055	213.762	524.02	731.733	286.803	852.438	709.857	592.467	634.516	735.699	585.883	645.608	749.439	505.524	565.135	766.286	536.357	482.977	739.948	516.806
301	3	799.122	1116.03	299.481	847.922	1110.84	242.937	821.34	1113.82	370.328	878.051	972.702	200.877	884.417	980.685	461.273	822.201	935.041	327.734	803.695	697.142	66.5066	603.564	732.768	141.317	646.972	758.874	206.003	578.915	782.082	213.798	523.958	731.772	286.828	852.456	709.869	592.473	634.514	735.711	585.872	645.608	749.437	505.542	565.139	766.298	536.387	482.997	739.958	516.82
302	3.01	799.118	1116.05	299.46	847.949	1110.84	242.928	821.351	1113.83	370.301	878.077	972.68	200.863	884.454	980.672	461.237	822.168	935.036	327.715	803.71	697.124	66.4881	603.586	732.808	141.244	647.008	758.862	205.974	578.964	782.084	213.794	523.947	731.814	286.828	852.462	709.887	592.479	634.499	735.696	585.881	645.598	749.43	505.522	565.107	766.324	536.389	483.022	739.959	516.775
303	3.02	799.21	1116	299.419	847.966	1110.85	242.897	821.387	1113.81	370.265	878.079	972.646	200.834	884.495	980.633	461.205	822.203	935.008	327.675	803.68	697.07	66.447	603.637	732.772	141.227	647.039	758.812	205.934	579.039	782.056	213.747	524.071	731.774	286.791	852.471	709.887	592.463	634.495	735.692	585.862	645.607	749.434	505.485	565.089	766.33	536.371	482.994	739.967	516.764
304	3.03	799.218	1115.99	299.429	847.953	1110.86	242.901	821.384	1113.81	370.258	878.066	972.651	200.816	884.505	980.625	461.181	822.26	934.957	327.647	803.659	697.055	66.4253	603.639	732.792	141.275	647.048	758.793	205.9	579.003	782.059	213.749	524.148	731.73	286.785	852.467	709.882	592.439	634.487	735.721	585.837	645.61	749.43	505.495	565.103	766.341	536.372	482.946	740.003	516.797
305	3.04	799.122	1116.02	299.469	847.936	1110.87	242.906	821.384	1113.82	370.267	878.085	972.64	200.8	884.506	980.624	461.17	822.198	934.962	327.652	803.648	697.034	66.4356	603.608	732.794	141.263	647.078	758.79	205.899	578.988	782.064	213.776	524.041	731.776	286.79	852.479	709.891	592.417	634.451	735.732	585.844	645.563	749.445	505.509	565.115	766.352	536.368	482.947	740.022	516.809
306	3.05	799.122	1116.02	299.45	847.926	1110.86	242.885	821.383	1113.83	370.256	878.088	972.615	200.795	884.46	980.607	461.156	822.156	934.941	327.646	803.643	697	66.4353	603.62	732.782	141.232	647.107	758.791	205.88	579.02	782.045	213.753	523.961	731.817	286.778	852.509	709.912	592.426	634.444	735.742	585.844	645.531	749.458	505.492	565.116	766.353	536.356	482.949	740.013	516.794
307	3.06	799.197	1116.01	299.432	847.936	1110.85	242.861	821.397	1113.83	370.245	878.051	972.586	200.797	884.444	980.601	461.142	822.205	934.884	327.658	803.631	696.977	66.4292	603.68	732.747	141.191	647.09	758.786	205.884	579.021	782.043	213.746	523.988	731.783	286.786	852.495	709.879	592.416	634.462	735.745	585.843	645.551	749.451	505.479	565.093	766.356	536.363	482.915	739.98	516.779
308	3.07	799.126	1116.05	299.481	847.928	1110.86	242.878	821.441	1113.83	370.261	878.073	972.576	200.793	884.469	980.601	461.147	822.21	934.842	327.688	803.638	696.975	66.442	603.682	732.717	141.235	647.069	758.799	205.937	578.987	782.051	213.805	523.946	731.794	286.837	852.479	709.839	592.392	634.482	735.704	585.856	645.594	749.436	505.491	565.113	766.333	536.362	482.953	739.946	516.8
309	3.08	799.104	1116.06	299.493	847.938	1110.89	242.896	821.456	1113.84	370.278	878.085	972.565	200.797	884.487	980.583	461.172	822.185	934.821	327.701	803.647	696.966	66.4627	603.599	732.724	141.3	647.077	758.808	205.971	578.995	782.02	213.829	523.976	731.77	286.871	852.524	709.808	592.39	634.481	735.689	585.872	645.615	749.425	505.512	565.133	766.314	536.381	483.002	739.94	516.812
310	3.09	799.152	1116.05	299.43	847.951	1110.88	242.859	821.445	1113.86	370.253	878.12	972.543	200.771	884.499	980.553	461.158	822.159	934.795	327.683	803.635	696.915	66.4694	603.564	732.742	141.301	647.061	758.794	205.963	579.001	782.01	213.811	524.035	731.75	286.871	852.535	709.778	592.378	634.477	735.685	585.858	645.618	749.403	505.504	565.157	766.294	536.375	483.015	739.92	516.792
311	3.1	799.251	1116.05	299.36	847.974	1110.87	242.803	821.438	1113.87	370.195	878.092	972.494	200.753	884.51	980.526	461.12	822.129	934.776	327.65	803.608	696.856	66.4393	603.557	732.752	141.283	647.03	758.759	205.918	579.009	782.019	213.773	524.039	731.737	286.822	852.506	709.76	592.369	634.48	735.692	585.827	645.631	749.381	505.48	565.182	766.291	536.353	482.959	739.923	516.784
312	3.11	799.271	1116.1	299.328	847.999	1110.87	242.778	821.435	1113.9	370.157	878.078	972.483	200.738	884.521	980.518	461.107	822.122	934.779	327.624	803.625	696.819	66.4238	603.586	732.756	141.259	647.064	758.747	205.896	579.016	782.033	213.76	524.044	731.752	286.798	852.517	709.771	592.362	634.5	735.702	585.829	645.656	749.386	505.46	565.171	766.308	536.344	483.002	739.937	516.799
313	3.12	799.241	1116.17	299.294	848.005	1110.91	242.759	821.46	1113.94	370.132	878.083	972.48	200.739	884.499	980.542	461.102	822.079	934.783	327.605	803.635	696.803	66.4432	603.698	732.758	141.209	647.058	758.782	205.886	579.004	782.047	213.753	524.031	731.789	286.791	852.529	709.79	592.358	634.511	735.693	585.825	645.594	749.403	505.447	565.156	766.322	536.327	483.013	739.96	516.811
314	3.13	799.201	1116.21	299.269	848.004	1110.94	242.726	821.438	1113.99	370.086	878.075	972.469	200.743	884.461	980.576	461.09	822.019	934.794	327.608	803.659	696.811	66.4704	603.705	732.786	141.171	647.064	758.827	205.89	578.985	782.068	213.754	524.026	731.768	286.779	852.476	709.791	592.36	634.489	735.713	585.821	645.56	749.424	505.44	565.162	766.313	536.32	482.947	740.002	516.803
315	3.14	799.265	1116.19	299.228	848.04	1110.95	242.693	821.423	1114.02	370.038	878.09	972.47	200.718	884.425	980.583	461.078	822.016	934.774	327.605	803.631	696.8	66.478	603.687	732.792	141.176	647.06	758.823	205.913	578.982	782.078	213.771	524.031	731.751	286.767	852.48	709.811	592.368	634.453	735.724	585.815	645.557	749.447	505.453	565.146	766.328	536.311	482.981	739.988	516.785
316	3.15	799.305	1116.19	299.206	848.088	1110.95	242.666	821.471	1114.02	370.025	878.073	972.455	200.71	884.422	980.57	461.063	822.084	934.72	327.605	803.614	696.779	66.469	603.665	732.788	141.213	647.052	758.797	205.936	578.987	782.075	213.79	524.053	731.764	286.782	852.476	709.85	592.399	634.426	735.731	585.829	645.579	749.454	505.458	565.119	766.335	536.327	482.963	739.981	516.799
317	3.16	799.344	1116.18	299.217	848.133	1110.97	242.66	821.5	1114.03	370.03	878.074	972.418	200.695	884.424	980.556	461.049	822.081	934.689	327.601	803.632	696.781	66.4859	603.638	732.771	141.274	647.076	758.793	205.918	579.006	782.068	213.794	524.08	731.752	286.832	852.464	709.86	592.429	634.397	735.727	585.834	645.612	749.437	505.474	565.079	766.332	536.347	482.919	739.997	516.815
318	3.17	799.312	1116.16	299.197	848.128	1110.98	242.671	821.478	1114.02	370.007	878.097	972.4	200.681	884.415	980.527	461.026	822.028	934.692	327.58	803.631	696.738	66.516	603.641	732.751	141.26	647.05	758.798	205.932	578.999	782.08	213.779	524.038	731.76	286.834	852.47	709.867	592.427	634.428	735.708	585.828	645.583	749.423	505.463	565.079	766.307	536.342	482.885	740.01	516.79
319	3.18	799.381	1116.14	299.158	848.107	1110.98	242.66	821.476	1114.01	369.982	878.125	972.385	200.654	884.406	980.499	461.001	822.003	934.666	327.57	803.616	696.667	66.52	603.599	732.759	141.283	647.045	758.785	205.94	578.982	782.078	213.789	523.982	731.774	286.814	852.464	709.863	592.438	634.447	735.693	585.835	645.584	749.399	505.465	565.149	766.287	536.314	482.933	739.997	516.785
320	3.19	799.444	1116.12	299.154	848.13	1110.99	242.655	821.504	1114	369.98	878.127	972.348	200.664	884.425	980.463	460.991	822.046	934.615	327.56	803.623	696.62	66.5227	603.632	732.77	141.256	647.083	758.756	205.905	579.017	782.059	213.771	524.022	731.74	286.789	852.443	709.844	592.462	634.443	735.686	585.862	645.625	749.377	505.47	565.186	766.266	536.307	482.964	739.963	516.8
321	3.2	799.495	1116.11	299.167	848.161	1110.96	242.668	821.526	1113.99	369.98	878.151	972.323	200.661	884.449	980.436	460.988	822.117	934.557	327.559	803.624	696.585	66.5158	603.66	732.791	141.223	647.075	758.741	205.928	579.04	782.034	213.776	524.079	731.71	286.786	852.446	709.841	592.49	634.485	735.686	585.84	645.645	749.368	505.456	565.175	766.252	536.322	483.01	739.935	516.799
322	3.21	799.433	1116.13	299.166	848.104	1110.95	242.679	821.526	1113.99	369.982	878.128	972.307	200.644	884.443	980.436	460.986	822.089	934.544	327.564	803.615	696.561	66.5071	603.619	732.794	141.254	647.066	758.743	205.947	579.014	782.032	213.806	524.052	731.735	286.777	852.46	709.835	592.484	634.527	735.718	585.829	645.632	749.376	505.44	565.176	766.251	536.315	482.993	739.955	516.805
323	3.22	799.398	1116.12	299.179	848.084	1110.95	242.68	821.524	1114.01	370	878.132	972.297	200.649	884.424	980.437	460.99	822.021	934.545	327.568	803.616	696.55	66.5107	603.625	732.787	141.253	647.068	758.784	205.963	579.01	782.047	213.787	524.055	731.737	286.774	852.458	709.837	592.467	634.528	735.717	585.835	645.625	749.375	505.46	565.192	766.27	536.307	482.994	739.934	516.801
324	3.23	799.381	1116.14	299.201	848.089	1110.96	242.669	821.495	1114.01	370.011	878.157	972.272	200.638	884.396	980.44	460.996	822.011	934.528	327.573	803.638	696.549	66.5248	603.685	732.798	141.218	647.092	758.825	205.957	579.019	782.058	213.775	524.026	731.757	286.798	852.467	709.822	592.475	634.507	735.692	585.843	645.665	749.378	505.461	565.194	766.279	536.315	483.005	739.942	516.782
325	3.24	799.204	1116.2	299.206	848.052	1110.97	242.671	821.433	1114.04	370.007	878.127	972.259	200.659	884.373	980.456	461.001	821.944	934.544	327.562	803.646	696.548	66.556	603.678	732.817	141.211	647.063	758.854	205.982	578.992	782.095	213.787	524.045	731.763	286.776	852.463	709.804	592.474	634.474	735.687	585.824	645.633	749.396	505.445	565.18	766.298	536.315	483.006	739.958	516.749
326	3.25	799.105	1116.23	299.228	848.005	1110.98	242.671	821.379	1114.07	370.018	878.069	972.271	200.7	884.307	980.465	461.021	821.905	934.536	327.575	803.632	696.563	66.572	603.628	732.797	141.224	647.055	758.84	206.018	578.982	782.108	213.812	523.976	731.822	286.781	852.465	709.8	592.463	634.439	735.707	585.811	645.565	749.422	505.448	565.151	766.311	536.302	482.951	739.951	516.748
327	3.26	799.179	1116.19	299.269	847.957	1110.97	242.7	821.372	1114.04	370.043	878.067	972.234	200.699	884.283	980.445	461.024	821.955	934.485	327.59	803.628	696.542	66.5679	603.652	732.795	141.233	647.09	758.799	205.997	579.02	782.085	213.832	524.015	731.808	286.783	852.461	709.795	592.45	634.431	735.729	585.835	645.552	749.427	505.444	565.134	766.33	536.321	482.949	739.969	516.786
328	3.27	799.285	1116.12	299.269	847.976	1110.97	242.698	821.377	1113.99	370.055	878.126	972.21	200.662	884.292	980.394	461.005	821.996	934.416	327.608	803.632	696.487	66.5452	603.708	732.805	141.227	647.13	758.73	205.945	579.048	782.048	213.83	524.096	731.729	286.772	852.467	709.751	592.429	634.451	735.738	585.857	645.599	749.4	505.446	565.135	766.338	536.338	482.95	740.003	516.796
329	3.28	799.299	1116.08	299.217	847.998	1110.97	242.694	821.356	1113.96	370.038	878.124	972.19	200.651	884.295	980.341	460.986	822.019	934.347	327.595	803.634	696.413	66.5343	603.695	732.808	141.254	647.128	758.674	205.914	579.084	782.014	213.803	524.057	731.737	286.77	852.476	709.738	592.426	634.455	735.718	585.842	645.625	749.375	505.43	565.175	766.328	536.328	482.97	740.007	516.794
330	3.29	799.267	1116.07	299.204	847.924	1110.97	242.705	821.321	1113.94	370.023	878.122	972.171	200.65	884.267	980.296	460.968	822.004	934.308	327.568	803.626	696.381	66.5513	603.683	732.808	141.22	647.134	758.651	205.889	579.12	782.002	213.748	524.039	731.725	286.745	852.489	709.716	592.421	634.442	735.696	585.829	645.61	749.365	505.396	565.198	766.314	536.292	482.914	739.989	516.778
331	3.3	799.297	1116.07	299.22	847.927	1110.96	242.718	821.309	1113.93	370.049	878.144	972.162	200.648	884.285	980.261	460.964	822.024	934.27	327.571	803.632	696.374	66.5595	603.713	732.797	141.193	647.133	758.658	205.926	579.1	782.005	213.745	524.091	731.7	286.746	852.486	709.679	592.431	634.48	735.676	585.831	645.634	749.363	505.393	565.188	766.292	536.293	482.945	739.959	516.76
332	3.31	799.246	1116.1	299.282	847.952	1110.96	242.764	821.355	1113.94	370.13	878.122	972.157	200.687	884.279	980.251	460.993	822.04	934.232	327.615	803.689	696.399	66.5871	603.741	732.806	141.184	647.101	758.717	206.01	579.11	782.019	213.788	524.068	731.735	286.797	852.515	709.653	592.425	634.511	735.662	585.846	645.686	749.348	505.425	565.178	766.278	536.326	483.015	739.931	516.776
333	3.32	799.108	1116.15	299.366	847.893	1110.97	242.848	821.357	1113.95	370.214	878.092	972.162	200.751	884.235	980.258	461.031	822.004	934.235	327.674	803.706	696.442	66.6285	603.716	732.775	141.228	647.086	758.784	206.072	579.07	782.061	213.843	524.037	731.771	286.84	852.544	709.614	592.417	634.47	735.646	585.843	645.685	749.352	505.48	565.136	766.293	536.337	482.994	739.934	516.785
334	3.33	799.038	1116.19	299.421	847.889	1110.98	242.865	821.332	1113.95	370.25	878.102	972.168	200.779	884.193	980.26	461.049	821.972	934.224	327.688	803.717	696.465	66.649	603.682	732.772	141.238	647.067	758.801	206.103	579.045	782.081	213.862	524.007	731.777	286.815	852.523	709.596	592.415	634.492	735.628	585.86	645.638	749.361	505.493	565.127	766.3	536.326	482.948	739.943	516.794
335	3.34	799.124	1116.14	299.416	847.902	1111	242.881	821.333	1113.93	370.251	878.133	972.146	200.761	884.191	980.242	461.022	822.019	934.181	327.657	803.699	696.433	66.6077	603.725	732.79	141.201	647.107	758.763	206.048	579.07	782.066	213.846	523.973	731.805	286.804	852.512	709.592	592.415	634.477	735.64	585.835	645.633	749.368	505.456	565.135	766.295	536.329	482.969	739.955	516.788
336	3.35	799.13	1116.11	299.402	847.932	1111.01	242.88	821.326	1113.93	370.246	878.134	972.117	200.745	884.201	980.219	461.001	822.103	934.136	327.625	803.698	696.413	66.5853	603.726	732.842	141.215	647.162	758.725	205.963	579.054	782.06	213.82	524.024	731.797	286.785	852.534	709.578	592.403	634.512	735.689	585.822	645.628	749.371	505.423	565.145	766.315	536.307	482.991	739.982	516.781
337	3.36	798.968	1116.15	299.444	847.888	1111.03	242.911	821.278	1113.93	370.267	878.09	972.113	200.769	884.17	980.214	461.017	822.002	934.164	327.621	803.663	696.407	66.5965	603.683	732.892	141.227	647.136	758.724	205.94	579.008	782.064	213.805	524.034	731.793	286.764	852.53	709.583	592.381	634.486	735.703	585.824	645.553	749.41	505.409	565.138	766.358	536.3	482.911	740.028	516.771
338	3.37	798.886	1116.18	299.475	847.803	1111.06	242.938	821.27	1113.94	370.3	878.119	972.125	200.766	884.125	980.205	461.021	821.969	934.166	327.626	803.647	696.419	66.6003	603.679	732.91	141.224	647.114	758.742	205.966	579.018	782.065	213.805	524.035	731.788	286.744	852.505	709.583	592.388	634.461	735.715	585.833	645.52	749.421	505.408	565.131	766.375	536.316	482.94	740.007	516.757
339	3.38	798.948	1116.19	299.51	847.833	1111.05	242.943	821.339	1113.92	370.346	878.133	972.118	200.775	884.162	980.185	461.031	822.069	934.105	327.648	803.668	696.418	66.5999	603.696	732.89	141.226	647.136	758.762	205.979	579.071	782.053	213.807	524.052	731.8	286.767	852.53	709.574	592.402	634.469	735.699	585.837	645.563	749.41	505.427	565.167	766.329	536.302	482.941	740.013	516.776
340	3.39	799.07	1116.16	299.532	847.856	1111.01	242.973	821.378	1113.89	370.383	878.131	972.099	200.77	884.16	980.161	461.042	822.149	934.051	327.682	803.664	696.406	66.6048	603.736	732.844	141.212	647.145	758.75	206.016	579.081	782.056	213.833	524.13	731.751	286.789	852.556	709.557	592.405	634.489	735.683	585.836	645.625	749.385	505.451	565.178	766.304	536.296	482.949	740.017	516.77
341	3.4	799.069	1116.15	299.552	847.852	1110.99	243.003	821.377	1113.87	370.41	878.109	972.075	200.768	884.134	980.113	461.042	822.19	934.002	327.687	803.651	696.381	66.6022	603.656	732.806	141.248	647.113	758.712	206.031	579.081	782.04	213.83	524.149	731.704	286.792	852.512	709.502	592.4	634.473	735.654	585.847	645.649	749.361	505.447	565.166	766.297	536.307	482.973	739.962	516.769
342	3.41	799.136	1116.11	299.587	847.862	1110.98	243.003	821.414	1113.84	370.426	878.114	972.045	200.783	884.148	980.072	461.028	822.249	933.923	327.692	803.698	696.374	66.6112	603.647	732.795	141.249	647.115	758.685	206.034	579.093	782.039	213.815	524.108	731.724	286.79	852.5	709.462	592.401	634.479	735.64	585.861	645.672	749.344	505.438	565.194	766.317	536.303	482.969	739.944	516.792
343	3.42	799.147	1116.1	299.608	847.904	1110.98	243	821.442	1113.84	370.434	878.134	972.044	200.785	884.165	980.053	461.025	822.313	933.888	327.688	803.724	696.349	66.6145	603.692	732.784	141.243	647.162	758.682	206.013	579.117	782.041	213.793	524.098	731.759	286.801	852.505	709.447	592.398	634.506	735.652	585.876	645.7	749.338	505.431	565.189	766.313	536.323	483.048	739.939	516.8
344	3.43	799.091	1116.1	299.606	847.898	1110.97	243.011	821.416	1113.83	370.431	878.115	972.031	200.796	884.145	980.033	461.018	822.29	933.873	327.685	803.702	696.319	66.5968	603.72	732.815	141.218	647.176	758.682	205.984	579.098	782.033	213.814	524.117	731.737	286.795	852.511	709.423	592.396	634.53	735.651	585.857	645.702	749.346	505.425	565.191	766.296	536.319	483.025	739.941	516.833
345	3.44	798.972	1116.11	299.613	847.859	1110.97	243.019	821.378	1113.84	370.432	878.067	972.018	200.793	884.115	980.02	461.004	822.297	933.852	327.681	803.677	696.323	66.5817	603.691	732.82	141.244	647.138	758.713	205.993	579.07	782.04	213.806	524.084	731.758	286.799	852.506	709.405	592.393	634.465	735.645	585.847	645.66	749.364	505.417	565.165	766.309	536.326	482.947	739.974	516.821
346	3.45	798.926	1116.11	299.625	847.854	1110.96	243.036	821.363	1113.84	370.454	878.058	972.019	200.794	884.088	980.011	461.006	822.369	933.787	327.68	803.671	696.323	66.5754	603.668	732.826	141.274	647.152	758.739	206	579.074	782.052	213.822	523.998	731.792	286.805	852.531	709.421	592.396	634.444	735.632	585.85	645.618	749.384	505.434	565.148	766.338	536.34	482.948	739.978	516.804
347	3.46	798.935	1116.08	299.648	847.827	1110.94	243.065	821.333	1113.83	370.475	878.056	972	200.817	884.05	979.993	461.018	822.379	933.746	327.707	803.645	696.312	66.568	603.685	732.799	141.283	647.168	758.725	205.992	579.077	782.059	213.833	523.993	731.81	286.835	852.527	709.397	592.401	634.434	735.64	585.857	645.598	749.399	505.467	565.146	766.339	536.335	482.955	739.976	516.821
348	3.47	798.946	1116.06	299.648	847.761	1110.93	243.066	821.283	1113.81	370.484	878.028	971.971	200.824	884.007	979.958	461.009	822.408	933.681	327.71	803.636	696.292	66.5666	603.695	732.752	141.243	647.154	758.699	205.982	579.105	782.033	213.812	524.004	731.82	286.85	852.504	709.357	592.411	634.433	735.64	585.858	645.583	749.378	505.471	565.127	766.331	536.349	482.892	739.989	516.831
349	3.48	798.951	1115.99	299.636	847.711	1110.92	243.037	821.235	1113.75	370.464	877.972	971.948	200.83	883.984	979.929	460.975	822.47	933.612	327.671	803.63	696.275	66.5301	603.7	732.744	141.205	647.147	758.697	205.939	579.119	782.005	213.794	524.024	731.773	286.82	852.481	709.331	592.415	634.429	735.634	585.858	645.592	749.363	505.423	565.123	766.312	536.33	482.894	739.971	516.802
350	3.49	798.883	1115.96	299.646	847.665	1110.9	243.036	821.202	1113.71	370.457	877.998	971.939	200.834	883.96	979.896	460.974	822.508	933.547	327.677	803.608	696.246	66.518	603.679	732.764	141.217	647.127	758.695	205.954	579.147	782.013	213.801	524.102	731.736	286.79	852.49	709.313	592.416	634.45	735.639	585.879	645.593	749.356	505.417	565.123	766.309	536.332	482.937	739.98	516.818
351	3.5	798.808	1115.94	299.674	847.616	1110.89	243.045	821.147	1113.7	370.46	877.992	971.925	200.851	883.932	979.874	460.981	822.519	933.527	327.667	803.595	696.237	66.514	603.669	732.776	141.234	647.13	758.673	205.967	579.161	782.034	213.811	524.058	731.768	286.795	852.49	709.287	592.417	634.492	735.666	585.894	645.606	749.348	505.43	565.165	766.33	536.33	483.004	739.99	516.803
352	3.51	798.758	1115.93	299.668	847.558	1110.88	243.029	821.072	1113.68	370.44	877.984	971.941	200.848	883.916	979.834	460.959	822.523	933.509	327.642	803.576	696.236	66.483	603.635	732.813	141.232	647.141	758.69	205.922	579.134	782.059	213.79	523.991	731.786	286.795	852.473	709.259	592.408	634.48	735.665	585.88	645.616	749.334	505.423	565.154	766.343	536.344	482.999	740.008	516.789
353	3.52	798.668	1115.91	299.665	847.505	1110.87	243.029	821.024	1113.66	370.438	877.968	971.944	200.841	883.903	979.805	460.943	822.496	933.471	327.625	803.554	696.234	66.4685	603.653	732.815	141.202	647.152	758.71	205.888	579.109	782.052	213.813	524.055	731.778	286.779	852.476	709.245	592.393	634.49	735.677	585.88	645.653	749.337	505.425	565.145	766.348	536.367	483	740.005	516.79
354	3.53	798.568	1115.88	299.703	847.424	1110.86	243.044	820.99	1113.64	370.469	877.927	971.931	200.856	883.86	979.789	460.951	822.478	933.444	327.636	803.549	696.252	66.4706	603.679	732.781	141.237	647.153	758.719	205.917	579.113	782.045	213.833	524.136	731.78	286.778	852.477	709.232	592.395	634.499	735.657	585.896	645.673	749.341	505.432	565.135	766.354	536.379	483.025	739.991	516.825
355	3.54	798.489	1115.85	299.741	847.322	1110.85	243.042	820.95	1113.63	370.485	877.894	971.926	200.867	883.834	979.787	460.954	822.468	933.409	327.652	803.516	696.26	66.4583	603.673	732.773	141.278	647.155	758.724	205.931	579.13	782.039	213.824	524.143	731.783	286.804	852.474	709.2	592.398	634.48	735.634	585.874	645.706	749.326	505.441	565.171	766.328	536.375	483.02	739.963	516.835
356	3.55	798.454	1115.8	299.746	847.241	1110.82	243.042	820.879	1113.59	370.488	877.861	971.917	200.854	883.816	979.776	460.948	822.463	933.385	327.652	803.52	696.28	66.4502	603.579	732.764	141.329	647.139	758.744	205.968	579.106	782.056	213.842	524.074	731.806	286.816	852.456	709.157	592.374	634.43	735.639	585.866	645.694	749.321	505.448	565.191	766.319	536.356	482.994	739.939	516.832
357	3.56	798.398	1115.76	299.772	847.16	1110.8	243.054	820.813	1113.56	370.512	877.835	971.925	200.837	883.765	979.772	460.946	822.434	933.379	327.669	803.519	696.301	66.4417	603.478	732.762	141.368	647.101	758.758	205.991	579.092	782.058	213.855	524.07	731.792	286.851	852.434	709.124	592.348	634.431	735.652	585.878	645.655	749.327	505.477	565.164	766.317	536.354	482.959	739.946	516.838
358	3.57	798.332	1115.71	299.81	847.079	1110.79	243.075	820.736	1113.52	370.522	877.815	971.917	200.823	883.734	979.755	460.937	822.434	933.351	327.659	803.49	696.279	66.4253	603.465	732.759	141.355	647.09	758.745	205.99	579.127	782.049	213.851	524.084	731.751	286.863	852.454	709.13	592.344	634.427	735.659	585.883	645.654	749.332	505.478	565.152	766.318	536.36	482.917	739.975	516.838
359	3.58	798.285	1115.62	299.809	847.014	1110.77	243.059	820.653	1113.47	370.489	877.843	971.923	200.8	883.722	979.719	460.901	822.464	933.31	327.618	803.449	696.227	66.3931	603.463	732.75	141.335	647.108	758.677	205.915	579.15	782.008	213.829	524.125	731.724	286.824	852.45	709.121	592.32	634.434	735.674	585.873	645.668	749.301	505.433	565.172	766.327	536.349	482.915	740.008	516.84
360	3.59	798.245	1115.53	299.777	846.935	1110.78	243.035	820.572	1113.42	370.454	877.849	971.936	200.783	883.731	979.696	460.865	822.445	933.265	327.556	803.419	696.177	66.366	603.459	732.772	141.311	647.116	758.638	205.827	579.135	782.004	213.802	524.195	731.697	286.766	852.477	709.108	592.289	634.462	735.691	585.864	645.641	749.281	505.379	565.181	766.318	536.333	482.911	739.997	516.797
361	3.6	798.153	1115.53	299.795	846.856	1110.77	243.034	820.491	1113.38	370.456	877.827	971.926	200.802	883.72	979.676	460.856	822.451	933.229	327.539	803.408	696.148	66.3467	603.533	732.78	141.277	647.151	758.628	205.833	579.101	782.002	213.805	524.151	731.735	286.765	852.505	709.098	592.277	634.479	735.703	585.876	645.636	749.279	505.366	565.203	766.309	536.323	482.902	740.017	516.792
362	3.61	798.098	1115.51	299.792	846.826	1110.76	243.013	820.464	1113.36	370.468	877.776	971.901	200.809	883.712	979.679	460.849	822.486	933.195	327.533	803.385	696.133	66.3413	603.67	732.761	141.22	647.184	758.642	205.851	579.127	782.004	213.811	524.132	731.779	286.789	852.547	709.1	592.281	634.525	735.689	585.866	645.634	749.292	505.384	565.213	766.337	536.335	482.957	740.021	516.809
363	3.62	798.048	1115.49	299.784	846.783	1110.75	242.986	820.432	1113.36	370.479	877.772	971.885	200.796	883.735	979.688	460.838	822.449	933.212	327.527	803.424	696.165	66.3412	603.637	732.748	141.238	647.198	758.689	205.847	579.136	782.031	213.799	524.118	731.786	286.791	852.534	709.086	592.269	634.533	735.675	585.85	645.649	749.295	505.398	565.235	766.345	536.333	483	739.983	516.808
364	3.63	797.939	1115.49	299.816	846.708	1110.74	242.999	820.399	1113.37	370.499	877.786	971.88	200.788	883.721	979.681	460.854	822.367	933.248	327.562	803.459	696.183	66.37	603.529	732.751	141.292	647.126	758.742	205.907	579.121	782.058	213.818	524.101	731.797	286.82	852.509	709.067	592.273	634.487	735.663	585.865	645.661	749.325	505.45	565.217	766.327	536.346	483.002	739.957	516.831
365	3.64	797.885	1115.46	299.847	846.628	1110.74	243.02	820.367	1113.38	370.51	877.72	971.849	200.815	883.694	979.682	460.87	822.363	933.25	327.592	803.471	696.191	66.3988	603.506	732.748	141.343	647.082	758.787	205.976	579.117	782.053	213.855	524.119	731.802	286.872	852.511	709.056	592.29	634.484	735.651	585.89	645.628	749.32	505.475	565.191	766.309	536.365	482.998	739.939	516.858
366	3.65	797.873	1115.39	299.858	846.563	1110.73	243.017	820.346	1113.36	370.501	877.754	971.833	200.816	883.678	979.666	460.867	822.437	933.216	327.602	803.456	696.174	66.387	603.542	732.739	141.329	647.119	758.79	205.976	579.128	782.056	213.883	524.058	731.833	286.886	852.525	709.06	592.31	634.508	735.641	585.895	645.62	749.308	505.478	565.188	766.319	536.38	483.046	739.92	516.864
367	3.66	797.891	1115.34	299.811	846.542	1110.7	242.994	820.293	1113.31	370.45	877.781	971.821	200.802	883.68	979.635	460.836	822.518	933.15	327.555	803.422	696.11	66.3617	603.537	732.73	141.308	647.146	758.708	205.926	579.149	782.031	213.845	524.091	731.787	286.846	852.493	709.066	592.324	634.503	735.627	585.896	645.648	749.286	505.468	565.174	766.323	536.372	483.011	739.948	516.855
368	3.67	797.854	1115.27	299.763	846.523	1110.69	242.961	820.229	1113.3	370.401	877.745	971.813	200.803	883.649	979.62	460.805	822.599	933.061	327.496	803.417	696.061	66.3614	603.539	732.744	141.325	647.159	758.654	205.885	579.153	781.994	213.831	524.115	731.749	286.818	852.478	709.089	592.34	634.488	735.646	585.896	645.664	749.275	505.448	565.158	766.327	536.38	482.937	739.999	516.854
369	3.68	797.86	1115.24	299.726	846.509	1110.67	242.933	820.176	1113.3	370.372	877.741	971.795	200.804	883.643	979.623	460.8	822.643	933.027	327.498	803.403	696.014	66.3553	603.504	732.773	141.367	647.178	758.636	205.868	579.128	781.991	213.851	524.104	731.763	286.844	852.456	709.124	592.358	634.465	735.673	585.925	645.624	749.269	505.45	565.172	766.338	536.408	482.951	739.994	516.856
370	3.69	797.88	1115.2	299.664	846.497	1110.66	242.906	820.171	1113.3	370.339	877.738	971.791	200.798	883.654	979.626	460.784	822.718	932.992	327.513	803.406	695.991	66.364	603.565	732.769	141.348	647.177	758.645	205.879	579.153	781.995	213.846	524.187	731.733	286.854	852.469	709.146	592.374	634.481	735.667	585.913	645.608	749.27	505.466	565.157	766.34	536.396	482.977	740.006	516.87
371	3.7	797.859	1115.22	299.621	846.495	1110.66	242.857	820.13	1113.3	370.299	877.758	971.776	200.791	883.668	979.633	460.763	822.689	932.985	327.49	803.427	695.974	66.3711	603.575	732.77	141.325	647.186	758.669	205.9	579.192	782.001	213.825	524.146	731.761	286.853	852.468	709.158	592.388	634.49	735.664	585.89	645.625	749.291	505.461	565.13	766.337	536.369	482.955	740	516.845
372	3.71	797.777	1115.28	299.599	846.481	1110.65	242.848	820.092	1113.33	370.278	877.757	971.745	200.808	883.64	979.647	460.758	822.67	933.021	327.496	803.447	695.967	66.3895	603.574	732.784	141.334	647.196	758.702	205.916	579.15	782.033	213.864	524.056	731.817	286.859	852.466	709.189	592.415	634.487	735.662	585.89	645.611	749.319	505.463	565.13	766.35	536.377	482.879	740.003	516.847
373	3.72	797.75	1115.29	299.599	846.461	1110.64	242.838	820.109	1113.33	370.266	877.767	971.717	200.801	883.641	979.647	460.768	822.644	933.049	327.515	803.482	695.972	66.4177	603.528	732.795	141.391	647.192	758.733	205.93	579.133	782.053	213.892	524.006	731.847	286.871	852.469	709.186	592.437	634.493	735.682	585.923	645.649	749.309	505.479	565.146	766.356	536.381	482.959	739.989	516.866
374	3.73	797.712	1115.29	299.59	846.423	1110.64	242.82	820.113	1113.32	370.246	877.79	971.708	200.795	883.657	979.648	460.76	822.614	933.065	327.518	803.511	695.966	66.4409	603.542	732.787	141.355	647.2	758.739	205.921	579.18	782.049	213.899	523.986	731.892	286.907	852.458	709.186	592.437	634.511	735.682	585.931	645.681	749.298	505.496	565.191	766.329	536.374	483.04	739.963	516.857
375	3.74	797.662	1115.29	299.553	846.404	1110.62	242.782	820.062	1113.31	370.211	877.764	971.696	200.809	883.64	979.652	460.736	822.642	933.045	327.473	803.527	695.92	66.4539	603.551	732.797	141.323	647.2	758.721	205.902	579.158	782.045	213.915	523.946	731.918	286.914	852.441	709.17	592.437	634.522	735.679	585.919	645.673	749.296	505.505	565.218	766.315	536.374	483.014	739.983	516.822
376	3.75	797.648	1115.26	299.515	846.38	1110.6	242.766	820.016	1113.29	370.189	877.725	971.682	200.795	883.601	979.64	460.711	822.697	932.988	327.441	803.521	695.87	66.4507	603.599	732.787	141.293	647.189	758.69	205.907	579.165	782.021	213.891	523.916	731.932	286.869	852.43	709.174	592.438	634.525	735.665	585.915	645.654	749.299	505.495	565.229	766.321	536.372	482.977	740	516.809
377	3.76	797.753	1115.14	299.528	846.353	1110.59	242.786	820.01	1113.24	370.196	877.723	971.682	200.772	883.625	979.62	460.702	822.884	932.871	327.42	803.496	695.846	66.4183	603.547	732.769	141.358	647.193	758.647	205.871	579.17	782.015	213.875	524.04	731.851	286.838	852.434	709.18	592.446	634.519	735.674	585.914	645.659	749.29	505.492	565.242	766.337	536.366	482.96	739.991	516.836
378	3.77	797.803	1115.07	299.565	846.348	1110.56	242.787	820.03	1113.18	370.21	877.731	971.656	200.756	883.665	979.595	460.683	823.128	932.739	327.387	803.458	695.807	66.3918	603.54	732.783	141.374	647.24	758.589	205.817	579.18	781.979	213.882	524.122	731.788	286.869	852.441	709.182	592.455	634.51	735.681	585.914	645.71	749.244	505.503	565.251	766.344	536.376	483.004	739.968	516.877
379	3.78	797.842	1115	299.548	846.309	1110.53	242.779	820.029	1113.14	370.208	877.711	971.617	200.742	883.668	979.565	460.643	823.183	932.653	327.36	803.43	695.782	66.3676	603.546	732.781	141.38	647.219	758.551	205.829	579.195	781.95	213.859	524.159	731.748	286.87	852.41	709.168	592.451	634.471	735.665	585.914	645.701	749.223	505.477	565.199	766.342	536.396	483.031	739.961	516.877
380	3.79	797.856	1114.95	299.554	846.267	1110.52	242.783	820.012	1113.11	370.214	877.747	971.603	200.733	883.664	979.545	460.615	823.179	932.612	327.339	803.433	695.774	66.3457	603.489	732.758	141.385	647.209	758.557	205.856	579.233	781.946	213.834	524.176	731.718	286.878	852.418	709.174	592.454	634.444	735.637	585.899	645.669	749.236	505.479	565.133	766.326	536.396	483.033	739.945	516.856
381	3.8	797.802	1114.96	299.58	846.189	1110.53	242.796	819.981	1113.11	370.233	877.737	971.611	200.741	883.633	979.538	460.614	823.209	932.643	327.349	803.416	695.788	66.3611	603.503	732.75	141.375	647.207	758.61	205.866	579.226	781.974	213.835	524.112	731.756	286.89	852.459	709.185	592.451	634.437	735.634	585.902	645.663	749.257	505.5	565.178	766.307	536.352	483.005	739.936	516.865
382	3.81	797.62	1115.04	299.661	846.098	1110.55	242.821	819.938	1113.13	370.276	877.692	971.65	200.74	883.606	979.563	460.646	823.064	932.781	327.379	803.394	695.818	66.3764	603.514	732.747	141.37	647.135	758.697	205.912	579.169	782.026	213.883	524.025	731.821	286.92	852.435	709.177	592.443	634.455	735.642	585.905	645.639	749.291	505.533	565.198	766.307	536.354	482.989	739.936	516.856
383	3.82	797.466	1115.1	299.695	846.041	1110.58	242.825	819.878	1113.15	370.306	877.661	971.644	200.745	883.569	979.602	460.646	822.873	932.943	327.391	803.396	695.853	66.3781	603.501	732.786	141.363	647.155	758.781	205.914	579.139	782.079	213.899	523.953	731.899	286.901	852.417	709.163	592.437	634.474	735.65	585.907	645.605	749.3	505.518	565.182	766.331	536.38	482.94	739.979	516.862
384	3.83	797.432	1115.09	299.701	846.034	1110.57	242.822	819.847	1113.13	370.317	877.662	971.659	200.731	883.566	979.602	460.613	822.965	932.941	327.346	803.389	695.84	66.3585	603.534	732.804	141.353	647.189	758.81	205.892	579.161	782.095	213.889	523.963	731.901	286.869	852.453	709.174	592.427	634.511	735.674	585.909	645.606	749.312	505.487	565.175	766.351	536.383	482.995	740.002	516.88
385	3.84	797.498	1115.01	299.721	846.029	1110.57	242.839	819.848	1113.08	370.333	877.672	971.65	200.73	883.615	979.561	460.596	823.192	932.846	327.3	803.374	695.808	66.3115	603.574	732.795	141.338	647.191	758.749	205.865	579.18	782.084	213.846	524.071	731.861	286.853	852.502	709.155	592.417	634.478	735.693	585.909	645.645	749.316	505.463	565.199	766.356	536.382	483.026	740.021	516.861
386	3.85	797.553	1114.92	299.731	846.014	1110.58	242.843	819.832	1113.03	370.349	877.635	971.626	200.735	883.634	979.541	460.582	823.323	932.804	327.252	803.361	695.804	66.293	603.556	732.826	141.309	647.205	758.689	205.832	579.172	782.067	213.841	524.144	731.852	286.835	852.518	709.157	592.402	634.5	735.683	585.894	645.687	749.293	505.438	565.203	766.375	536.39	483.004	740.049	516.869
387	3.86	797.491	1114.9	299.763	845.97	1110.55	242.844	819.738	1112.98	370.365	877.609	971.591	200.714	883.615	979.515	460.557	823.365	932.773	327.208	803.33	695.798	66.2529	603.545	732.802	141.298	647.149	758.653	205.838	579.16	782.035	213.85	524.17	731.828	286.813	852.505	709.135	592.389	634.461	735.666	585.882	645.661	749.265	505.42	565.185	766.357	536.384	482.983	740.034	516.838
388	3.87	797.503	1114.85	299.793	845.928	1110.51	242.887	819.703	1112.93	370.399	877.597	971.582	200.7	883.584	979.473	460.532	823.398	932.747	327.201	803.296	695.779	66.2154	603.56	732.766	141.282	647.169	758.606	205.862	579.203	782.012	213.836	524.158	731.785	286.8	852.495	709.121	592.39	634.426	735.645	585.87	645.653	749.25	505.403	565.172	766.351	536.375	482.99	739.981	516.814
389	3.88	797.481	1114.81	299.872	845.886	1110.49	242.944	819.715	1112.9	370.468	877.57	971.6	200.707	883.596	979.458	460.555	823.436	932.755	327.224	803.284	695.785	66.1993	603.639	732.755	141.296	647.2	758.595	205.877	579.255	781.99	213.838	524.131	731.77	286.844	852.452	709.088	592.385	634.477	735.655	585.899	645.647	749.238	505.437	565.19	766.324	536.369	483.034	739.96	516.83
390	3.89	797.423	1114.83	299.945	845.817	1110.48	242.979	819.702	1112.87	370.524	877.505	971.597	200.724	883.567	979.453	460.564	823.392	932.795	327.271	803.248	695.793	66.1912	603.649	732.701	141.259	647.197	758.607	205.884	579.229	781.974	213.861	524.083	731.769	286.889	852.416	709.044	592.372	634.482	735.643	585.903	645.63	749.249	505.474	565.165	766.302	536.366	482.991	739.957	516.845
391	3.9	797.31	1114.89	299.984	845.778	1110.46	243.003	819.647	1112.86	370.563	877.485	971.639	200.726	883.538	979.46	460.559	823.385	932.84	327.307	803.241	695.823	66.178	603.604	732.66	141.261	647.161	758.634	205.88	579.204	781.982	213.868	524.066	731.777	286.878	852.446	709.03	592.353	634.435	735.631	585.89	645.639	749.277	505.47	565.142	766.312	536.365	482.892	739.963	516.86
392	3.91	797.289	1114.87	300.013	845.786	1110.45	243.042	819.661	1112.86	370.609	877.485	971.645	200.731	883.56	979.464	460.556	823.479	932.832	327.289	803.256	695.845	66.1672	603.588	732.662	141.249	647.182	758.641	205.848	579.205	781.995	213.862	524.136	731.766	286.847	852.463	709.032	592.346	634.406	735.622	585.881	645.649	749.298	505.471	565.158	766.323	536.352	482.913	739.954	516.87
393	3.92	797.31	1114.82	300.06	845.771	1110.45	243.072	819.69	1112.84	370.648	877.498	971.65	200.747	883.593	979.473	460.57	823.682	932.8	327.257	803.248	695.85	66.1522	603.655	732.681	141.227	647.201	758.646	205.869	579.249	781.991	213.83	524.17	731.757	286.853	852.496	709.038	592.36	634.484	735.628	585.89	645.661	749.29	505.449	565.152	766.319	536.335	482.96	739.956	516.839
394	3.93	797.278	1114.82	300.085	845.781	1110.46	243.068	819.653	1112.82	370.659	877.5	971.658	200.753	883.6	979.477	460.565	823.689	932.84	327.227	803.226	695.882	66.1237	603.66	732.697	141.213	647.201	758.685	205.839	579.231	782.013	213.784	524.085	731.802	286.833	852.499	709.049	592.347	634.508	735.65	585.878	645.662	749.287	505.42	565.162	766.327	536.33	482.976	739.988	516.807
395	3.94	797.319	1114.78	300.078	845.784	1110.46	243.078	819.633	1112.78	370.665	877.53	971.668	200.741	883.592	979.468	460.535	823.656	932.913	327.189	803.22	695.919	66.0987	603.657	732.717	141.148	647.203	758.692	205.808	579.231	782.035	213.756	524.053	731.81	286.769	852.475	709.041	592.333	634.437	735.64	585.847	645.671	749.281	505.4	565.208	766.304	536.288	482.979	739.973	516.776
396	3.95	797.337	1114.79	300.121	845.834	1110.45	243.108	819.658	1112.75	370.714	877.569	971.694	200.736	883.619	979.455	460.543	823.716	932.981	327.191	803.214	695.953	66.0956	603.713	732.725	141.113	647.21	758.672	205.845	579.251	782.03	213.761	524.136	731.779	286.74	852.503	709.042	592.36	634.475	735.63	585.82	645.693	749.265	505.396	565.224	766.297	536.293	483.015	739.974	516.769
397	3.96	797.411	1114.75	300.187	845.891	1110.47	243.155	819.733	1112.72	370.79	877.605	971.71	200.75	883.638	979.437	460.559	823.8	933.005	327.222	803.209	695.991	66.0988	603.783	732.736	141.074	647.203	758.672	205.877	579.24	782.032	213.78	524.193	731.779	286.746	852.521	709.082	592.399	634.506	735.616	585.823	645.672	749.254	505.393	565.246	766.283	536.294	483.069	739.96	516.791
398	3.97	797.448	1114.71	300.189	845.903	1110.47	243.178	819.743	1112.7	370.809	877.619	971.751	200.741	883.627	979.426	460.542	823.9	933.016	327.168	803.211	696.017	66.0715	603.727	732.749	141.078	647.2	758.663	205.857	579.26	782.01	213.738	524.133	731.815	286.707	852.448	709.069	592.42	634.493	735.616	585.819	645.663	749.256	505.357	565.239	766.277	536.275	483.06	739.924	516.758
399	3.98	797.444	1114.71	300.187	845.975	1110.47	243.187	819.757	1112.68	370.817	877.634	971.799	200.735	883.645	979.422	460.507	823.983	933.031	327.103	803.216	696.048	66.0469	603.71	732.781	141.059	647.213	758.632	205.813	579.294	781.982	213.713	524.173	731.787	286.64	852.42	709.059	592.417	634.447	735.598	585.757	645.678	749.254	505.326	565.224	766.285	536.245	483.018	739.933	516.725
400	3.99	797.507	1114.74	300.244	846.04	1110.51	243.242	819.793	1112.7	370.886	877.651	971.817	200.747	883.664	979.424	460.523	824.059	933.066	327.098	803.248	696.113	66.0515	603.757	732.8	141.03	647.204	758.634	205.843	579.321	782.001	213.729	524.172	731.819	286.621	852.431	709.067	592.432	634.468	735.619	585.763	645.691	749.258	505.322	565.237	766.302	536.235	483.06	739.948	516.718
401	4	797.516	1114.84	300.343	846.075	1110.55	243.318	819.86	1112.73	370.973	877.674	971.836	200.754	883.656	979.433	460.56	824.06	933.16	327.129	803.254	696.151	66.0627	603.77	732.793	141.056	647.187	758.679	205.895	579.304	782.039	213.738	524.161	731.833	286.669	852.433	709.085	592.448	634.505	735.61	585.81	645.659	749.292	505.357	565.216	766.318	536.249	483.113	739.936	516.712
402	4.01	797.473	1114.93	300.419	846.132	1110.57	243.349	819.913	1112.76	371.02	877.669	971.852	200.752	883.63	979.434	460.56	824.051	933.226	327.104	803.276	696.204	66.0503	603.743	732.789	141.047	647.14	758.722	205.897	579.254	782.053	213.747	524.075	731.873	286.681	852.44	709.099	592.435	634.505	735.615	585.79	645.6	749.316	505.368	565.172	766.314	536.227	483.052	739.925	516.702
403	4.02	797.59	1114.93	300.444	846.227	1110.58	243.387	819.959	1112.75	371.06	877.673	971.849	200.754	883.581	979.397	460.539	824.177	933.179	327.091	803.258	696.245	66.0221	603.776	732.734	140.982	647.132	758.695	205.903	579.265	782.02	213.734	523.975	731.89	286.677	852.432	709.083	592.452	634.433	735.601	585.747	645.575	749.304	505.363	565.117	766.285	536.199	482.991	739.918	516.681
404	4.03	797.81	1114.9	300.479	846.349	1110.58	243.436	820.068	1112.72	371.122	877.679	971.864	200.757	883.583	979.37	460.529	824.343	933.12	327.081	803.248	696.249	65.9797	603.904	732.718	140.915	647.157	758.631	205.905	579.321	781.971	213.722	524.012	731.846	286.672	852.42	709.07	592.481	634.442	735.571	585.729	645.61	749.282	505.338	565.111	766.266	536.181	482.945	739.926	516.694
405	4.04	797.943	1114.87	300.492	846.448	1110.57	243.474	820.142	1112.69	371.16	877.68	971.879	200.747	883.601	979.345	460.524	824.408	933.106	327.074	803.222	696.252	65.9347	603.904	732.677	140.868	647.208	758.597	205.875	579.359	781.928	213.681	524.162	731.751	286.642	852.412	709.042	592.477	634.442	735.566	585.73	645.658	749.235	505.304	565.16	766.253	536.156	482.909	739.914	516.69
406	4.05	797.939	1114.9	300.489	846.466	1110.59	243.488	820.151	1112.71	371.17	877.697	971.898	200.732	883.582	979.337	460.514	824.342	933.187	327.035	803.201	696.278	65.9075	603.855	732.684	140.852	647.223	758.596	205.82	579.325	781.936	213.637	524.191	731.728	286.587	852.382	709.008	592.457	634.436	735.563	585.715	645.608	749.243	505.275	565.138	766.264	536.135	482.871	739.904	516.644
407	4.06	797.879	1114.98	300.521	846.468	1110.64	243.495	820.189	1112.75	371.19	877.685	971.917	200.74	883.564	979.358	460.521	824.311	933.281	326.98	803.214	696.342	65.9043	603.91	732.708	140.812	647.204	758.629	205.808	579.294	781.969	213.615	524.141	731.805	286.532	852.381	709.002	592.443	634.442	735.58	585.675	645.575	749.274	505.253	565.144	766.278	536.121	482.935	739.927	516.608
408	4.07	797.873	1115.04	300.557	846.545	1110.68	243.513	820.253	1112.81	371.238	877.685	971.951	200.745	883.609	979.39	460.535	824.326	933.367	326.939	803.246	696.416	65.8995	604.061	732.708	140.71	647.202	758.678	205.827	579.321	781.998	213.599	524.125	731.878	286.517	852.409	709.002	592.438	634.527	735.581	585.669	645.624	749.291	505.255	565.199	766.279	536.082	483.065	739.937	516.582
409	4.08	797.869	1115.09	300.573	846.644	1110.7	243.506	820.297	1112.86	371.26	877.679	971.976	200.746	883.656	979.411	460.539	824.375	933.437	326.929	803.275	696.473	65.8623	604.139	732.709	140.634	647.199	758.725	205.812	579.349	782.024	213.591	524.059	731.916	286.501	852.403	708.985	592.427	634.536	735.599	585.659	645.633	749.299	505.242	565.251	766.268	536.056	483.062	739.935	516.577
410	4.09	797.862	1115.1	300.595	846.693	1110.7	243.524	820.321	1112.87	371.281	877.719	972.022	200.747	883.642	979.416	460.552	824.421	933.475	326.935	803.265	696.524	65.8401	604.175	732.69	140.612	647.206	758.743	205.805	579.347	782.018	213.592	524.014	731.932	286.515	852.4	708.987	592.428	634.506	735.578	585.642	645.614	749.303	505.23	565.284	766.26	536.04	483.053	739.918	516.573
411	4.1	797.907	1115.11	300.656	846.713	1110.71	243.561	820.41	1112.84	371.309	877.745	972.037	200.771	883.654	979.404	460.558	824.441	933.471	326.949	803.241	696.57	65.8299	604.17	732.659	140.669	647.22	758.709	205.826	579.351	782.015	213.606	523.994	731.927	286.55	852.394	708.99	592.441	634.504	735.571	585.633	645.634	749.295	505.259	565.298	766.263	536.039	483.088	739.907	516.597
412	4.11	798.003	1115.08	300.665	846.759	1110.7	243.563	820.5	1112.8	371.332	877.749	972.02	200.789	883.658	979.382	460.538	824.528	933.455	326.962	803.239	696.602	65.8099	604.181	732.606	140.659	647.248	758.664	205.861	579.399	781.986	213.596	524.079	731.854	286.544	852.447	709.027	592.476	634.522	735.587	585.637	645.643	749.28	505.277	565.332	766.261	536.034	483.081	739.9	516.582
413	4.12	798.078	1115	300.629	846.757	1110.67	243.545	820.481	1112.76	371.312	877.761	972.02	200.764	883.639	979.372	460.512	824.586	933.423	326.959	803.224	696.597	65.7869	604.213	732.585	140.611	647.221	758.613	205.854	579.392	781.947	213.561	524.213	731.767	286.516	852.439	709.046	592.481	634.494	735.572	585.619	645.624	749.265	505.256	565.304	766.24	536.02	483.013	739.878	516.558
414	4.13	798.023	1114.99	300.605	846.666	1110.67	243.542	820.389	1112.75	371.282	877.723	972.045	200.754	883.604	979.377	460.494	824.55	933.403	326.934	803.185	696.6	65.7831	604.161	732.619	140.613	647.168	758.618	205.843	579.342	781.949	213.549	524.158	731.757	286.491	852.4	709.052	592.49	634.468	735.554	585.624	645.565	749.252	505.215	565.244	766.226	535.999	482.954	739.872	516.549
415	4.14	797.941	1115	300.616	846.641	1110.67	243.549	820.343	1112.75	371.274	877.655	972.069	200.774	883.574	979.388	460.493	824.54	933.417	326.931	803.184	696.616	65.7968	604.101	732.648	140.658	647.173	758.654	205.843	579.299	781.968	213.57	524.073	731.775	286.503	852.388	709.102	592.506	634.444	735.543	585.61	645.556	749.259	505.209	565.214	766.218	536.003	482.952	739.889	516.561
416	4.15	797.976	1114.96	300.597	846.638	1110.66	243.539	820.349	1112.74	371.279	877.619	972.063	200.772	883.585	979.412	460.493	824.586	933.434	326.938	803.175	696.604	65.7992	604.095	732.647	140.615	647.19	758.649	205.843	579.304	781.97	213.594	524.063	731.803	286.52	852.413	709.157	592.536	634.404	735.56	585.587	645.573	749.264	505.203	565.208	766.238	535.984	482.985	739.871	516.555
417	4.16	797.935	1114.95	300.542	846.639	1110.63	243.497	820.318	1112.75	371.233	877.598	972.068	200.762	883.59	979.449	460.483	824.535	933.479	326.91	803.158	696.594	65.7904	604.113	732.664	140.578	647.193	758.657	205.853	579.339	781.99	213.588	524.075	731.82	286.485	852.401	709.192	592.561	634.412	735.588	585.584	645.547	749.281	505.201	565.242	766.232	535.948	482.978	739.893	516.538
418	4.17	797.918	1114.95	300.508	846.596	1110.62	243.455	820.256	1112.74	371.191	877.592	972.076	200.764	883.581	979.483	460.486	824.514	933.493	326.877	803.171	696.589	65.7939	604.131	732.669	140.581	647.166	758.694	205.838	579.336	782.011	213.582	524.037	731.847	286.464	852.416	709.212	592.564	634.422	735.594	585.562	645.527	749.297	505.188	565.259	766.241	535.955	482.999	739.889	516.522
419	4.18	797.897	1114.95	300.482	846.537	1110.61	243.43	820.23	1112.75	371.181	877.583	972.082	200.775	883.569	979.515	460.489	824.474	933.517	326.888	803.217	696.596	65.8117	604.205	732.649	140.546	647.174	758.736	205.862	579.321	782.029	213.583	524.075	731.871	286.462	852.428	709.22	592.581	634.444	735.598	585.566	645.561	749.308	505.203	565.279	766.253	535.961	483.022	739.902	516.52
420	4.19	797.789	1114.95	300.456	846.496	1110.59	243.424	820.188	1112.75	371.156	877.57	972.082	200.77	883.564	979.54	460.492	824.446	933.56	326.892	803.226	696.592	65.8341	604.24	732.649	140.537	647.186	758.753	205.882	579.32	782.067	213.572	524.074	731.873	286.467	852.431	709.24	592.595	634.512	735.602	585.581	645.603	749.318	505.222	565.301	766.248	535.965	483.029	739.92	516.546
421	4.2	797.722	1114.94	300.402	846.46	1110.57	243.376	820.074	1112.73	371.093	877.554	972.099	200.757	883.542	979.552	460.473	824.382	933.608	326.869	803.203	696.593	65.8263	604.259	732.657	140.467	647.156	758.776	205.91	579.312	782.072	213.557	523.935	731.927	286.469	852.418	709.263	592.595	634.513	735.585	585.56	645.578	749.328	505.226	565.316	766.241	535.927	483.035	739.916	516.518
422	4.21	797.719	1114.87	300.334	846.419	1110.53	243.322	819.957	1112.67	371.015	877.548	972.105	200.714	883.52	979.539	460.432	824.366	933.613	326.799	803.168	696.574	65.8062	604.295	732.652	140.398	647.17	758.733	205.858	579.3	782.027	213.537	523.999	731.884	286.427	852.417	709.305	592.62	634.497	735.601	585.532	645.555	749.307	505.198	565.303	766.235	535.897	483.032	739.899	516.465
423	4.22	797.768	1114.75	300.261	846.387	1110.48	243.292	819.924	1112.6	370.951	877.556	972.096	200.676	883.522	979.535	460.387	824.476	933.565	326.739	803.124	696.517	65.7545	604.318	732.636	140.388	647.22	758.629	205.791	579.342	781.981	213.497	524.163	731.777	286.362	852.408	709.34	592.643	634.522	735.624	585.553	645.576	749.274	505.163	565.282	766.237	535.882	483.044	739.891	516.479
424	4.23	797.818	1114.62	300.225	846.377	1110.42	243.248	819.906	1112.54	370.905	877.565	972.105	200.665	883.514	979.536	460.36	824.581	933.547	326.733	803.104	696.493	65.7139	604.32	732.584	140.395	647.215	758.562	205.782	579.403	781.944	213.474	524.197	731.733	286.369	852.389	709.339	592.663	634.502	735.623	585.552	645.579	749.236	505.141	565.268	766.25	535.899	483.007	739.896	516.486
425	4.24	797.816	1114.57	300.205	846.329	1110.38	243.23	819.86	1112.51	370.89	877.524	972.103	200.663	883.475	979.529	460.35	824.585	933.538	326.751	803.09	696.509	65.689	604.307	732.598	140.429	647.196	758.553	205.805	579.391	781.934	213.483	524.138	731.75	286.395	852.369	709.35	592.677	634.483	735.602	585.542	645.562	749.241	505.151	565.227	766.248	535.925	483.008	739.904	516.479
426	4.25	797.779	1114.57	300.189	846.266	1110.37	243.242	819.832	1112.51	370.899	877.522	972.129	200.657	883.471	979.542	460.353	824.559	933.573	326.737	803.097	696.57	65.694	604.302	732.606	140.421	647.162	758.574	205.832	579.39	781.942	213.491	524.103	731.786	286.418	852.36	709.366	592.687	634.474	735.569	585.539	645.565	749.266	505.175	565.192	766.235	535.925	483.031	739.896	516.485
427	4.26	797.645	1114.66	300.209	846.246	1110.36	243.237	819.806	1112.52	370.902	877.536	972.185	200.66	883.503	979.572	460.366	824.521	933.636	326.722	803.134	696.655	65.6979	604.3	732.607	140.425	647.154	758.653	205.857	579.356	781.989	213.53	524.065	731.838	286.428	852.371	709.381	592.683	634.46	735.572	585.545	645.527	749.286	505.172	565.219	766.213	535.919	483.037	739.888	516.478
428	4.27	797.513	1114.74	300.232	846.202	1110.38	243.241	819.758	1112.55	370.919	877.525	972.237	200.684	883.503	979.6	460.378	824.323	933.748	326.75	803.171	696.733	65.7245	604.328	732.6	140.416	647.181	758.75	205.903	579.324	782.032	213.562	524.022	731.882	286.443	852.395	709.397	592.669	634.447	735.579	585.53	645.514	749.301	505.185	565.247	766.204	535.911	483.051	739.86	516.453
429	4.28	797.405	1114.79	300.248	846.119	1110.41	243.249	819.717	1112.57	370.916	877.495	972.255	200.676	883.504	979.629	460.365	824.201	933.836	326.741	803.194	696.789	65.7268	604.349	732.594	140.393	647.142	758.811	205.941	579.293	782.06	213.565	523.959	731.934	286.449	852.422	709.395	592.643	634.454	735.597	585.509	645.495	749.326	505.193	565.267	766.216	535.881	483.044	739.868	516.445
430	4.29	797.41	1114.76	300.213	846.124	1110.42	243.202	819.721	1112.54	370.882	877.476	972.256	200.651	883.521	979.63	460.338	824.279	933.842	326.662	803.164	696.792	65.6738	604.3	732.589	140.374	647.133	758.796	205.906	579.278	782.064	213.526	523.971	731.913	286.426	852.435	709.401	592.615	634.488	735.618	585.513	645.534	749.297	505.168	565.254	766.206	535.888	483.002	739.867	516.421
431	4.3	797.567	1114.62	300.167	846.129	1110.42	243.184	819.711	1112.48	370.835	877.49	972.232	200.603	883.558	979.599	460.289	824.447	933.785	326.59	803.089	696.758	65.6091	604.345	732.561	140.298	647.162	758.72	205.815	579.301	782.019	213.472	524.03	731.858	286.367	852.462	709.414	592.59	634.495	735.633	585.484	645.561	749.259	505.111	565.262	766.196	535.871	483.017	739.859	516.407
432	4.31	797.69	1114.5	300.14	846.134	1110.4	243.193	819.724	1112.43	370.812	877.511	972.225	200.551	883.575	979.568	460.244	824.558	933.75	326.554	803.047	696.727	65.5587	604.332	732.546	140.268	647.191	758.648	205.761	579.339	781.97	213.457	524.071	731.802	286.363	852.449	709.391	592.56	634.509	735.628	585.474	645.577	749.216	505.073	565.271	766.205	535.844	483.035	739.883	516.405
433	4.32	797.758	1114.44	300.136	846.171	1110.39	243.209	819.759	1112.41	370.821	877.528	972.229	200.514	883.568	979.552	460.233	824.528	933.781	326.551	803.035	696.731	65.5316	604.347	732.54	140.271	647.176	758.609	205.76	579.375	781.959	213.437	524.081	731.78	286.36	852.438	709.376	592.549	634.543	735.627	585.499	645.571	749.171	505.057	565.275	766.206	535.854	483.031	739.871	516.414
434	4.33	797.758	1114.47	300.169	846.208	1110.38	243.22	819.798	1112.41	370.852	877.511	972.247	200.527	883.562	979.556	460.254	824.554	933.797	326.554	803.034	696.761	65.5319	604.334	732.536	140.29	647.151	758.578	205.744	579.391	781.961	213.428	524.096	731.78	286.369	852.423	709.364	592.544	634.504	735.618	585.492	645.584	749.188	505.066	565.256	766.213	535.851	483.024	739.877	516.417
435	4.34	797.728	1114.54	300.218	846.217	1110.4	243.216	819.815	1112.43	370.888	877.51	972.294	200.561	883.582	979.571	460.266	824.641	933.816	326.566	803.034	696.828	65.5416	604.342	732.559	140.326	647.107	758.605	205.788	579.38	781.971	213.443	524.094	731.793	286.406	852.425	709.352	592.53	634.461	735.61	585.466	645.568	749.233	505.092	565.267	766.235	535.862	483.014	739.887	516.434
436	4.35	797.712	1114.64	300.266	846.283	1110.42	243.226	819.848	1112.48	370.917	877.462	972.346	200.583	883.611	979.604	460.278	824.676	933.864	326.56	803.057	696.909	65.5509	604.369	732.565	140.332	647.111	758.666	205.838	579.361	781.991	213.474	524.114	731.801	286.421	852.427	709.347	592.52	634.454	735.617	585.467	645.526	749.271	505.11	565.284	766.222	535.843	483.009	739.871	516.43
437	4.36	797.691	1114.72	300.276	846.366	1110.43	243.232	819.903	1112.52	370.93	877.487	972.4	200.588	883.598	979.633	460.29	824.654	933.941	326.56	803.097	696.978	65.5695	604.435	732.544	140.287	647.115	758.749	205.869	579.385	782.014	213.483	524.157	731.787	286.401	852.426	709.345	592.514	634.467	735.618	585.454	645.491	749.289	505.1	565.27	766.219	535.836	483.011	739.873	516.41
438	4.37	797.66	1114.78	300.279	846.357	1110.44	243.25	819.939	1112.56	370.936	877.503	972.425	200.605	883.6	979.648	460.307	824.58	934.031	326.565	803.115	697.019	65.5867	604.409	732.533	140.258	647.098	758.804	205.879	579.369	782.035	213.472	524.067	731.857	286.413	852.424	709.328	592.521	634.487	735.623	585.451	645.487	749.312	505.093	565.256	766.221	535.834	483.005	739.869	516.39
439	4.38	797.689	1114.79	300.291	846.377	1110.44	243.264	819.961	1112.57	370.956	877.488	972.447	200.627	883.594	979.65	460.329	824.461	934.085	326.601	803.103	697.045	65.5957	604.383	732.53	140.258	647.068	758.814	205.879	579.313	782.043	213.479	524.003	731.883	286.438	852.392	709.308	592.52	634.451	735.617	585.463	645.447	749.315	505.084	565.252	766.209	535.827	482.951	739.856	516.417
440	4.39	797.769	1114.78	300.291	846.429	1110.43	243.267	819.999	1112.56	370.972	877.483	972.48	200.634	883.583	979.65	460.336	824.475	934.086	326.602	803.106	697.065	65.5954	604.372	732.544	140.278	647.092	758.763	205.868	579.351	782.017	213.469	524.002	731.848	286.457	852.392	709.329	592.531	634.464	735.61	585.475	645.454	749.316	505.091	565.247	766.201	535.833	482.926	739.86	516.432
441	4.4	797.842	1114.74	300.292	846.508	1110.44	243.273	820.072	1112.53	370.962	877.509	972.472	200.623	883.629	979.636	460.325	824.594	934.055	326.578	803.1	697.026	65.5804	604.391	732.538	140.292	647.131	758.697	205.819	579.377	781.968	213.461	524.059	731.801	286.418	852.399	709.349	592.536	634.504	735.606	585.472	645.478	749.288	505.086	565.241	766.198	535.849	482.984	739.833	516.415
442	4.41	797.93	1114.68	300.266	846.546	1110.45	243.295	820.113	1112.5	370.94	877.534	972.453	200.597	883.658	979.611	460.312	824.661	934.026	326.568	803.071	696.996	65.5595	604.385	732.549	140.306	647.133	758.639	205.778	579.362	781.937	213.452	524.101	731.761	286.378	852.412	709.365	592.539	634.511	735.608	585.472	645.515	749.217	505.077	565.224	766.192	535.857	483.017	739.788	516.406
443	4.42	798.031	1114.63	300.248	846.561	1110.45	243.282	820.156	1112.49	370.919	877.567	972.447	200.568	883.686	979.593	460.309	824.706	934.035	326.558	803.071	697.006	65.5445	604.399	732.606	140.267	647.119	758.623	205.765	579.356	781.935	213.427	524.049	731.768	286.369	852.427	709.409	592.555	634.523	735.635	585.481	645.559	749.188	505.073	565.258	766.191	535.852	483.043	739.81	516.415
444	4.43	798.143	1114.61	300.248	846.637	1110.45	243.28	820.227	1112.52	370.925	877.594	972.464	200.573	883.738	979.616	460.314	824.786	934.04	326.538	803.076	697.036	65.53	604.446	732.612	140.238	647.147	758.612	205.754	579.387	781.944	213.426	524.103	731.745	286.356	852.452	709.436	592.58	634.51	735.646	585.492	645.577	749.202	505.08	565.27	766.195	535.858	483.063	739.844	516.413
445	4.44	798.137	1114.68	300.243	846.71	1110.46	243.301	820.273	1112.55	370.928	877.57	972.495	200.606	883.761	979.649	460.341	824.756	934.108	326.561	803.113	697.109	65.5437	604.499	732.6	140.217	647.153	758.65	205.781	579.37	781.963	213.438	524.09	731.776	286.346	852.439	709.45	592.591	634.52	735.637	585.471	645.561	749.268	505.098	565.235	766.221	535.843	483.002	739.866	516.39
446	4.45	797.989	1114.8	300.284	846.728	1110.48	243.326	820.318	1112.59	370.944	877.561	972.563	200.664	883.761	979.682	460.38	824.655	934.21	326.605	803.145	697.192	65.5877	604.467	732.588	140.224	647.122	758.715	205.841	579.348	782.012	213.457	524.052	731.875	286.358	852.45	709.466	592.593	634.555	735.638	585.47	645.535	749.304	505.121	565.283	766.212	535.822	483.023	739.874	516.396
447	4.46	797.897	1114.87	300.296	846.718	1110.49	243.339	820.345	1112.65	370.956	877.581	972.637	200.704	883.755	979.723	460.406	824.588	934.295	326.621	803.168	697.252	65.6215	604.451	732.585	140.222	647.099	758.808	205.877	579.318	782.044	213.467	524.038	731.895	286.385	852.426	709.465	592.602	634.531	735.634	585.489	645.504	749.323	505.123	565.28	766.209	535.82	483.034	739.876	516.409
448	4.47	797.961	1114.86	300.269	846.756	1110.49	243.308	820.353	1112.66	370.944	877.567	972.649	200.707	883.764	979.749	460.419	824.665	934.33	326.634	803.21	697.296	65.6288	604.416	732.615	140.245	647.096	758.833	205.895	579.298	782.053	213.483	524.085	731.848	286.379	852.399	709.474	592.609	634.508	735.629	585.472	645.486	749.336	505.138	565.235	766.213	535.82	483.041	739.866	516.41
449	4.48	798.019	1114.84	300.27	846.785	1110.47	243.298	820.365	1112.64	370.941	877.6	972.652	200.688	883.81	979.756	460.425	824.687	934.354	326.637	803.225	697.32	65.6365	604.435	732.62	140.28	647.097	758.797	205.912	579.298	782.038	213.488	524.111	731.831	286.391	852.418	709.493	592.615	634.482	735.613	585.461	645.52	749.337	505.148	565.245	766.211	535.833	483.077	739.857	516.408
450	4.49	798.082	1114.81	300.268	846.798	1110.44	243.316	820.398	1112.59	370.93	877.643	972.669	200.682	883.84	979.753	460.43	824.721	934.354	326.653	803.2	697.319	65.6224	604.419	732.59	140.313	647.109	758.754	205.91	579.316	782.013	213.47	524.201	731.757	286.374	852.431	709.493	592.63	634.496	735.599	585.473	645.551	749.308	505.177	565.301	766.2	535.836	483.065	739.871	516.403
451	4.5	798.183	1114.74	300.243	846.831	1110.42	243.307	820.404	1112.55	370.902	877.618	972.661	200.687	883.853	979.731	460.429	824.802	934.315	326.65	803.171	697.283	65.5988	604.468	732.561	140.269	647.127	758.696	205.882	579.356	781.966	213.441	524.204	731.72	286.36	852.422	709.502	592.631	634.495	735.612	585.492	645.579	749.271	505.181	565.288	766.192	535.865	483.044	739.858	516.417
452	4.51	798.2	1114.69	300.215	846.853	1110.39	243.288	820.384	1112.5	370.862	877.628	972.668	200.672	883.831	979.727	460.429	824.845	934.31	326.627	803.15	697.256	65.5911	604.459	732.558	140.266	647.119	758.653	205.846	579.386	781.926	213.421	524.133	731.736	286.381	852.459	709.51	592.629	634.49	735.609	585.474	645.594	749.246	505.144	565.258	766.197	535.884	483.036	739.827	516.434
453	4.52	798.088	1114.72	300.226	846.854	1110.36	243.294	820.33	1112.5	370.837	877.621	972.683	200.675	883.82	979.747	460.432	824.707	934.376	326.627	803.147	697.279	65.5969	604.392	732.561	140.286	647.119	758.649	205.805	579.355	781.944	213.445	524.085	731.761	286.372	852.455	709.5	592.613	634.493	735.605	585.468	645.542	749.274	505.137	565.22	766.195	535.867	482.977	739.842	516.434
454	4.53	798.019	1114.72	300.213	846.816	1110.36	243.295	820.26	1112.51	370.831	877.601	972.71	200.689	883.813	979.771	460.455	824.685	934.435	326.62	803.158	697.308	65.6215	604.394	732.555	140.279	647.099	758.659	205.837	579.321	781.964	213.463	524.002	731.812	286.371	852.467	709.515	592.599	634.497	735.597	585.48	645.485	749.29	505.144	565.233	766.206	535.87	482.949	739.843	516.408
455	4.54	798.003	1114.72	300.179	846.783	1110.36	243.286	820.222	1112.5	370.821	877.597	972.735	200.687	883.823	979.795	460.45	824.705	934.469	326.613	803.169	697.336	65.6164	604.436	732.536	140.256	647.089	758.684	205.845	579.309	781.98	213.461	524.005	731.812	286.357	852.434	709.518	592.606	634.513	735.6	585.477	645.475	749.296	505.126	565.225	766.201	535.873	482.988	739.831	516.386
456	4.55	798.021	1114.73	300.193	846.77	1110.35	243.278	820.221	1112.5	370.824	877.6	972.76	200.664	883.831	979.812	460.443	824.724	934.485	326.614	803.159	697.371	65.6059	604.434	732.542	140.243	647.144	758.682	205.812	579.335	781.975	213.433	523.937	731.857	286.38	852.415	709.526	592.607	634.487	735.622	585.46	645.496	749.307	505.128	565.185	766.202	535.868	483.003	739.859	516.395
457	4.56	797.981	1114.75	300.233	846.764	1110.36	243.288	820.207	1112.5	370.85	877.589	972.795	200.681	883.792	979.825	460.455	824.738	934.494	326.624	803.169	697.407	65.6136	604.446	732.558	140.265	647.182	758.708	205.809	579.327	781.985	213.46	523.92	731.883	286.401	852.412	709.526	592.604	634.475	735.657	585.463	645.489	749.341	505.143	565.16	766.225	535.869	482.938	739.883	516.44
458	4.57	798.02	1114.74	300.273	846.749	1110.35	243.314	820.21	1112.5	370.89	877.567	972.836	200.693	883.795	979.836	460.474	824.745	934.511	326.631	803.177	697.434	65.6184	604.455	732.545	140.288	647.113	758.733	205.847	579.323	782.007	213.474	523.968	731.868	286.384	852.393	709.537	592.62	634.46	735.663	585.482	645.482	749.36	505.166	565.153	766.249	535.911	482.932	739.883	516.47
459	4.58	798.033	1114.7	300.283	846.71	1110.34	243.311	820.219	1112.48	370.904	877.534	972.846	200.698	883.806	979.837	460.47	824.791	934.53	326.613	803.134	697.434	65.6024	604.473	732.557	140.258	647.082	758.73	205.84	579.28	782.021	213.466	524.049	731.826	286.376	852.394	709.549	592.605	634.47	735.669	585.492	645.48	749.371	505.167	565.17	766.25	535.905	482.946	739.896	516.463
460	4.59	798.026	1114.65	300.266	846.67	1110.34	243.285	820.238	1112.48	370.898	877.522	972.852	200.681	883.817	979.836	460.45	824.794	934.538	326.607	803.126	697.44	65.5777	604.483	732.556	140.198	647.096	758.734	205.819	579.327	782.001	213.43	524.065	731.819	286.372	852.416	709.542	592.597	634.487	735.672	585.474	645.496	749.367	505.143	565.163	766.245	535.905	482.938	739.915	516.445
461	4.6	797.997	1114.64	300.244	846.643	1110.34	243.268	820.213	1112.46	370.901	877.526	972.887	200.675	883.808	979.829	460.443	824.796	934.554	326.584	803.13	697.459	65.5666	604.411	732.545	140.228	647.094	758.745	205.809	579.348	781.993	213.411	524.029	731.84	286.38	852.431	709.554	592.596	634.46	735.656	585.468	645.486	749.355	505.132	565.174	766.237	535.905	482.962	739.882	516.424
462	4.61	797.989	1114.62	300.26	846.601	1110.33	243.264	820.208	1112.41	370.918	877.524	972.903	200.666	883.826	979.827	460.442	824.676	934.605	326.601	803.118	697.471	65.5726	604.39	732.524	140.258	647.073	758.739	205.819	579.325	782.001	213.421	524.085	731.802	286.389	852.433	709.563	592.604	634.46	735.628	585.488	645.499	749.324	505.134	565.196	766.206	535.895	483.004	739.846	516.452
463	4.62	797.99	1114.59	300.279	846.556	1110.33	243.285	820.225	1112.38	370.93	877.489	972.901	200.674	883.823	979.813	460.439	824.6	934.642	326.625	803.1	697.474	65.562	604.296	732.544	140.323	647.066	758.742	205.821	579.289	781.991	213.442	524.097	731.759	286.408	852.425	709.559	592.6	634.448	735.625	585.501	645.553	749.301	505.167	565.232	766.179	535.888	483.05	739.819	516.441
464	4.63	798	1114.55	300.261	846.52	1110.32	243.291	820.203	1112.36	370.912	877.461	972.919	200.656	883.814	979.806	460.424	824.628	934.645	326.604	803.077	697.486	65.54	604.284	732.545	140.334	647.035	758.742	205.827	579.284	781.981	213.447	524.105	731.77	286.417	852.425	709.57	592.589	634.479	735.613	585.482	645.549	749.289	505.165	565.258	766.177	535.877	483.057	739.776	516.433
465	4.64	797.954	1114.53	300.238	846.509	1110.32	243.298	820.177	1112.35	370.886	877.447	972.923	200.635	883.853	979.811	460.411	824.699	934.659	326.563	803.065	697.487	65.5221	604.285	732.523	140.334	647.058	758.727	205.805	579.295	781.975	213.433	524.071	731.764	286.427	852.445	709.575	592.575	634.534	735.597	585.487	645.514	749.287	505.152	565.238	766.179	535.868	483.044	739.776	516.416
466	4.65	797.955	1114.51	300.225	846.515	1110.32	243.291	820.175	1112.36	370.889	877.448	972.947	200.638	883.873	979.829	460.414	824.704	934.695	326.57	803.068	697.511	65.5242	604.239	732.534	140.369	647.045	758.74	205.816	579.294	781.989	213.429	524.153	731.758	286.406	852.453	709.579	592.547	634.55	735.616	585.483	645.518	749.306	505.164	565.238	766.19	535.868	483.062	739.792	516.414
467	4.66	797.92	1114.56	300.241	846.52	1110.32	243.271	820.156	1112.38	370.892	877.469	973	200.646	883.887	979.849	460.423	824.639	934.73	326.6	803.07	697.531	65.5296	604.234	732.557	140.372	647.033	758.762	205.826	579.272	782.008	213.438	524.092	731.815	286.415	852.452	709.577	592.529	634.532	735.632	585.487	645.507	749.326	505.18	565.239	766.219	535.887	483.109	739.812	516.417
468	4.67	797.922	1114.57	300.214	846.509	1110.32	243.257	820.143	1112.39	370.871	877.464	973.024	200.645	883.891	979.862	460.417	824.668	934.726	326.605	803.07	697.547	65.5216	604.283	732.563	140.358	647.034	758.785	205.817	579.245	782.014	213.437	523.979	731.83	286.422	852.475	709.588	592.52	634.495	735.655	585.471	645.483	749.337	505.156	565.22	766.232	535.896	483.054	739.857	516.428
469	4.68	797.893	1114.6	300.184	846.515	1110.34	243.225	820.133	1112.41	370.82	877.47	973.037	200.621	883.899	979.875	460.407	824.687	934.76	326.586	803.056	697.57	65.5147	604.324	732.556	140.301	647.072	758.792	205.8	579.277	782.008	213.43	523.975	731.821	286.389	852.465	709.578	592.499	634.438	735.66	585.48	645.475	749.341	505.13	565.197	766.24	535.882	482.987	739.872	516.42
470	4.69	797.895	1114.58	300.157	846.551	1110.32	243.201	820.131	1112.44	370.792	877.498	973.057	200.628	883.916	979.896	460.434	824.665	934.79	326.609	803.08	697.607	65.5175	604.322	732.542	140.315	647.106	758.808	205.802	579.274	782.001	213.447	523.968	731.843	286.415	852.46	709.598	592.51	634.433	735.665	585.489	645.453	749.337	505.124	565.208	766.23	535.884	482.972	739.885	516.412
471	4.7	797.885	1114.57	300.156	846.547	1110.3	243.21	820.136	1112.46	370.792	877.491	973.074	200.672	883.914	979.903	460.461	824.625	934.836	326.633	803.097	697.632	65.5339	604.281	732.536	140.383	647.078	758.809	205.815	579.252	782.002	213.485	523.99	731.83	286.428	852.476	709.605	592.523	634.465	735.664	585.507	645.464	749.338	505.156	565.213	766.234	535.902	482.91	739.879	516.457
472	4.71	797.891	1114.6	300.165	846.527	1110.27	243.217	820.174	1112.46	370.791	877.524	973.079	200.673	883.887	979.896	460.473	824.721	934.831	326.63	803.103	697.635	65.5522	604.211	732.498	140.465	647.038	758.799	205.839	579.268	781.999	213.5	524.036	731.815	286.441	852.462	709.594	592.531	634.475	735.646	585.536	645.481	749.361	505.209	565.203	766.236	535.936	482.911	739.867	516.502
473	4.72	797.925	1114.55	300.156	846.584	1110.24	243.22	820.206	1112.43	370.78	877.541	973.079	200.665	883.903	979.898	460.466	824.744	934.831	326.633	803.112	697.641	65.5487	604.179	732.487	140.52	647.059	758.742	205.852	579.304	781.979	213.484	524.035	731.78	286.454	852.427	709.575	592.533	634.505	735.63	585.534	645.522	749.347	505.236	565.213	766.233	535.951	482.945	739.854	516.524
474	4.73	797.991	1114.5	300.104	846.636	1110.22	243.201	820.267	1112.41	370.762	877.561	973.087	200.641	883.93	979.883	460.472	824.753	934.813	326.655	803.112	697.636	65.5264	604.198	732.515	140.501	647.086	758.692	205.836	579.308	781.96	213.501	524.063	731.763	286.474	852.43	709.574	592.538	634.51	735.617	585.566	645.547	749.322	505.25	565.204	766.249	535.975	482.954	739.845	516.524
475	4.74	798.039	1114.46	300.061	846.652	1110.23	243.163	820.298	1112.41	370.716	877.569	973.113	200.636	883.969	979.89	460.479	824.812	934.8	326.657	803.099	697.633	65.5224	604.164	732.547	140.494	647.117	758.661	205.79	579.326	781.949	213.497	524.101	731.741	286.477	852.438	709.596	592.546	634.466	735.624	585.595	645.573	749.313	505.248	565.154	766.245	536.001	482.966	739.86	516.541
476	4.75	798.105	1114.47	300.024	846.661	1110.24	243.152	820.281	1112.44	370.68	877.578	973.123	200.633	883.987	979.906	460.481	824.81	934.832	326.647	803.123	697.649	65.5464	604.145	732.564	140.522	647.109	758.676	205.769	579.316	781.939	213.487	524.086	731.761	286.491	852.428	709.616	592.553	634.448	735.643	585.584	645.565	749.317	505.248	565.165	766.255	536.016	482.947	739.887	516.55
477	4.76	798.065	1114.51	299.988	846.66	1110.26	243.144	820.282	1112.47	370.644	877.581	973.151	200.628	883.986	979.93	460.497	824.782	934.894	326.658	803.135	697.671	65.5712	604.097	732.583	140.576	647.05	758.738	205.795	579.258	781.961	213.498	523.974	731.823	286.488	852.436	709.639	592.557	634.442	735.642	585.578	645.526	749.338	505.247	565.179	766.249	536.031	482.927	739.883	516.55
478	4.77	798.019	1114.6	299.983	846.656	1110.29	243.134	820.294	1112.51	370.623	877.64	973.204	200.65	883.998	979.967	460.524	824.784	934.95	326.687	803.151	697.712	65.5911	604.048	732.605	140.619	647.031	758.807	205.812	579.234	781.989	213.534	523.969	731.826	286.472	852.44	709.668	592.559	634.442	735.656	585.587	645.492	749.36	505.251	565.199	766.256	536.044	482.972	739.854	516.535
479	4.78	798.063	1114.66	299.993	846.716	1110.3	243.13	820.332	1112.55	370.63	877.65	973.223	200.665	884.017	979.99	460.543	824.757	934.97	326.721	803.195	697.753	65.633	604.003	732.633	140.677	647.048	758.826	205.833	579.244	781.988	213.559	524.015	731.811	286.493	852.42	709.666	592.564	634.441	735.676	585.613	645.475	749.363	505.262	565.206	766.259	536.064	482.955	739.865	516.548
480	4.79	798.061	1114.68	300.016	846.767	1110.3	243.149	820.383	1112.58	370.659	877.748	973.33	200.652	884.047	979.995	460.57	824.778	934.971	326.743	803.209	697.785	65.6453	603.981	732.616	140.671	647.059	758.815	205.84	579.249	781.986	213.583	524.005	731.834	286.576	852.424	709.669	592.568	634.432	735.675	585.607	645.505	749.366	505.309	565.182	766.255	536.083	482.946	739.879	516.578
481	4.8	798.147	1114.69	300.037	846.779	1110.31	243.168	820.418	1112.61	370.664	877.939	973.443	200.64	884.07	979.999	460.583	824.719	935.018	326.767	803.245	697.813	65.6603	603.96	732.599	140.7	647.028	758.814	205.866	579.237	781.989	213.591	524.012	731.816	286.599	852.44	709.678	592.565	634.422	735.675	585.631	645.532	749.363	505.33	565.184	766.253	536.088	482.915	739.912	516.6
482	4.81	798.205	1114.69	300.045	846.803	1110.31	243.176	820.481	1112.63	370.667	877.734	973.309	200.692	884.111	980.007	460.602	824.728	935.049	326.772	803.26	697.81	65.6758	603.888	732.608	140.8	646.999	758.778	205.873	579.222	781.987	213.602	523.966	731.84	286.588	852.46	709.685	592.558	634.404	735.681	585.659	645.548	749.37	505.341	565.194	766.263	536.103	482.93	739.922	516.613
483	4.82	798.186	1114.71	300.057	846.841	1110.32	243.177	820.548	1112.63	370.689	877.836	973.388	200.684	884.151	980.003	460.627	824.813	935.041	326.786	803.243	697.812	65.6778	603.784	732.656	140.918	647.032	758.765	205.829	579.194	781.98	213.633	524.012	731.839	286.616	852.446	709.673	592.552	634.435	735.675	585.697	645.598	749.37	505.363	565.171	766.287	536.146	483.003	739.925	516.644
484	4.83	798.274	1114.7	300.065	846.878	1110.33	243.182	820.605	1112.62	370.703	877.985	973.511	200.67	884.154	979.986	460.65	824.813	935.045	326.816	803.235	697.824	65.6774	603.742	732.681	140.974	647.033	758.755	205.802	579.201	781.98	213.63	524.081	731.789	286.639	852.434	709.669	592.564	634.471	735.672	585.725	645.581	749.368	505.379	565.183	766.299	536.189	482.981	739.936	516.682
485	4.84	798.333	1114.69	300.069	846.869	1110.33	243.192	820.637	1112.62	370.699	877.772	973.348	200.699	884.166	979.974	460.658	824.863	935.013	326.818	803.24	697.841	65.68	603.718	732.68	140.988	646.999	758.73	205.806	579.22	781.97	213.609	524.092	731.777	286.656	852.42	709.672	592.566	634.434	735.675	585.746	645.584	749.337	505.385	565.196	766.297	536.205	482.936	739.933	516.688
486	4.85	798.389	1114.67	300.09	846.901	1110.33	243.206	820.672	1112.63	370.73	877.703	973.295	200.716	884.157	979.972	460.678	824.845	934.99	326.858	803.235	697.865	65.6707	603.667	732.641	141.033	647.001	758.733	205.807	579.189	781.959	213.634	524.095	731.753	286.708	852.407	709.651	592.565	634.414	735.665	585.775	645.598	749.329	505.412	565.173	766.298	536.244	482.935	739.908	516.711
487	4.86	798.376	1114.73	300.154	846.931	1110.31	243.234	820.714	1112.65	370.779	877.692	973.313	200.748	884.154	979.994	460.725	824.795	935.013	326.919	803.249	697.904	65.6983	603.602	732.61	141.118	646.997	758.754	205.827	579.165	781.957	213.691	524.069	731.78	286.748	852.408	709.631	592.575	634.409	735.671	585.807	645.588	749.34	505.47	565.175	766.288	536.267	482.94	739.902	516.753
488	4.87	798.322	1114.78	300.212	846.974	1110.31	243.269	820.751	1112.7	370.824	877.845	973.431	200.756	884.16	980.015	460.766	824.755	935.056	326.977	803.262	697.945	65.733	603.56	732.625	141.21	647.007	758.79	205.85	579.142	781.96	213.742	524.087	731.797	286.806	852.433	709.62	592.568	634.435	735.699	585.841	645.566	749.365	505.507	565.146	766.278	536.317	482.981	739.913	516.775
489	4.88	798.347	1114.78	300.206	846.984	1110.34	243.284	820.745	1112.74	370.826	878.109	973.653	200.736	884.167	980.033	460.796	824.698	935.096	327.009	803.294	697.997	65.7486	603.453	732.669	141.264	647.008	758.809	205.807	579.121	781.981	213.763	524	731.837	286.845	852.417	709.629	592.543	634.433	735.722	585.86	645.548	749.378	505.53	565.096	766.302	536.364	482.959	739.951	516.786
490	4.89	798.353	1114.78	300.209	846.996	1110.37	243.293	820.732	1112.76	370.816	878.16	973.747	200.732	884.174	980.046	460.801	824.641	935.159	327.074	803.31	698.046	65.7496	603.387	732.688	141.316	647.032	758.816	205.765	579.112	781.999	213.762	523.989	731.842	286.848	852.41	709.639	592.535	634.452	735.739	585.895	645.56	749.393	505.525	565.084	766.333	536.397	482.909	739.977	516.818
491	4.9	798.361	1114.83	300.291	846.994	1110.38	243.342	820.776	1112.78	370.857	878.218	973.8	200.742	884.197	980.069	460.825	824.597	935.215	327.107	803.326	698.098	65.768	603.407	732.692	141.362	647.015	758.834	205.806	579.119	782.006	213.797	524.019	731.851	286.865	852.435	709.654	592.545	634.455	735.767	585.918	645.541	749.409	505.546	565.078	766.365	536.445	482.912	740.003	516.848
492	4.91	798.372	1114.86	300.363	847.001	1110.37	243.394	820.798	1112.79	370.891	878.118	973.724	200.779	884.218	980.083	460.848	824.536	935.243	327.171	803.357	698.134	65.8038	603.381	732.702	141.403	647.018	758.854	205.828	579.136	781.996	213.85	524.072	731.86	286.893	852.464	709.687	592.573	634.45	735.768	585.947	645.513	749.421	505.572	565.073	766.378	536.448	482.883	740.021	516.891
493	4.92	798.353	1114.86	300.402	846.994	1110.38	243.411	820.787	1112.77	370.899	877.838	973.514	200.817	884.219	980.069	460.858	824.536	935.232	327.201	803.387	698.154	65.8256	603.231	732.714	141.477	647.028	758.823	205.821	579.09	781.981	213.878	524.086	731.852	286.922	852.431	709.691	592.568	634.471	735.783	585.967	645.489	749.422	505.589	565.034	766.386	536.453	482.828	740.018	516.895
494	4.93	798.422	1114.84	300.438	846.987	1110.38	243.433	820.832	1112.73	370.926	877.766	973.49	200.857	884.237	980.042	460.858	824.664	935.179	327.204	803.391	698.165	65.8163	603.208	732.683	141.527	647.012	758.782	205.791	579.073	781.975	213.893	524.06	731.828	286.956	852.405	709.68	592.57	634.442	735.786	585.991	645.478	749.411	505.623	565.015	766.387	536.481	482.825	740.017	516.924
495	4.94	798.524	1114.82	300.483	847.027	1110.39	243.465	820.897	1112.71	370.97	877.871	973.568	200.849	884.286	980.031	460.864	824.788	935.152	327.21	803.416	698.187	65.8147	603.18	732.684	141.556	647.007	758.769	205.799	579.129	781.968	213.897	524.03	731.826	287.02	852.384	709.676	592.574	634.45	735.779	585.987	645.501	749.389	505.665	565.04	766.386	536.516	482.834	740	516.983
496	4.95	798.568	1114.8	300.525	847.049	1110.39	243.489	820.96	1112.7	371.005	878.177	973.775	200.817	884.318	980.014	460.867	824.795	935.152	327.231	803.431	698.203	65.8249	603.149	732.677	141.602	646.992	758.777	205.824	579.118	781.952	213.906	524.03	731.812	287.06	852.4	709.668	592.583	634.469	735.749	585.996	645.556	749.383	505.677	565.053	766.379	536.522	482.805	739.983	516.999
497	4.96	798.543	1114.81	300.565	847.068	1110.38	243.497	821	1112.7	371.016	878.119	973.743	200.83	884.325	980.004	460.865	824.744	935.163	327.258	803.455	698.229	65.8252	603.105	732.67	141.623	646.962	758.788	205.837	579.091	781.957	213.904	523.974	731.836	287.078	852.411	709.664	592.583	634.458	735.745	586	645.574	749.361	505.68	565.066	766.366	536.511	482.865	739.927	516.976
498	4.97	798.557	1114.83	300.618	847.084	1110.38	243.535	821.044	1112.7	371.053	877.993	973.662	200.856	884.311	979.991	460.873	824.798	935.133	327.279	803.473	698.259	65.8205	603.11	732.659	141.645	646.97	758.794	205.832	579.08	781.973	213.937	524.016	731.804	287.077	852.428	709.666	592.572	634.466	735.757	586.002	645.609	749.346	505.7	565.104	766.357	536.527	482.897	739.927	517.005
499	4.98	798.556	1114.85	300.659	847.078	1110.41	243.556	821.088	1112.71	371.077	878.245	973.85	200.83	884.343	979.996	460.891	824.845	935.147	327.316	803.481	698.263	65.8329	603.107	732.691	141.672	647.01	758.805	205.79	579.103	781.992	213.947	524.057	731.793	287.098	852.453	709.662	592.579	634.512	735.784	586.021	645.652	749.331	505.715	565.096	766.373	536.569	482.924	739.949	517.049
500	4.99	798.486	1114.9	300.679	847.057	1110.44	243.553	821.094	1112.73	371.077	878.299	973.911	200.813	884.363	980.024	460.911	824.785	935.203	327.322	803.518	698.282	65.8352	603.092	732.711	141.676	647.034	758.839	205.772	579.11	781.996	213.947	524.023	731.852	287.096	852.439	709.662	592.573	634.512	735.805	586.043	645.651	749.351	505.692	565.111	766.382	536.559	482.947	739.953	517.064
501	5	798.432	1114.94	300.657	847.064	1110.44	243.543	821.091	1112.77	371.066	878.28	973.93	200.807	884.359	980.048	460.913	824.633	935.249	327.326	803.528	698.305	65.8341	603.074	732.69	141.653	646.985	758.872	205.764	579.067	782.007	213.928	523.987	731.881	287.07	852.413	709.639	592.542	634.488	735.779	586.028	645.606	749.386	505.675	565.096	766.378	536.533	482.892	739.958	517.028
502	5.01	798.428	1114.99	300.656	847.065	1110.45	243.532	821.107	1112.8	371.065	878.245	973.927	200.805	884.344	980.065	460.923	824.492	935.312	327.345	803.517	698.309	65.8285	603.095	732.673	141.633	646.991	758.891	205.761	579.044	782.049	213.924	523.973	731.883	287.07	852.403	709.652	592.538	634.51	735.789	586.004	645.548	749.404	505.696	565.076	766.373	536.537	482.863	739.978	517.015
503	5.02	798.45	1115.01	300.688	847.066	1110.48	243.553	821.127	1112.83	371.089	878.215	973.963	200.808	884.324	980.086	460.941	824.44	935.34	327.355	803.506	698.329	65.8334	603.135	732.664	141.638	646.959	758.922	205.813	579.038	782.049	213.936	524.039	731.855	287.091	852.42	709.672	592.547	634.489	735.793	586.002	645.529	749.408	505.708	565.062	766.396	536.551	482.804	740.008	517.018
504	5.03	798.488	1114.99	300.698	847.047	1110.48	243.579	821.13	1112.83	371.098	878.218	973.973	200.803	884.326	980.089	460.942	824.481	935.336	327.357	803.495	698.34	65.8464	603.076	732.675	141.663	646.928	758.915	205.832	579.063	782.038	213.927	524.041	731.873	287.108	852.418	709.682	592.544	634.476	735.791	586.008	645.519	749.413	505.702	565.066	766.4	536.565	482.81	740.003	517.035
505	5.04	798.529	1114.97	300.701	847.067	1110.48	243.578	821.133	1112.82	371.098	878.088	973.884	200.803	884.316	980.076	460.927	824.523	935.323	327.32	803.47	698.336	65.8471	603.055	732.683	141.654	646.956	758.842	205.806	579.057	782.012	213.914	524.033	731.851	287.081	852.405	709.702	592.539	634.489	735.794	586.022	645.51	749.412	505.686	565.055	766.403	536.564	482.78	740.006	517.03
506	5.05	798.61	1114.93	300.694	847.082	1110.49	243.583	821.161	1112.79	371.095	877.913	973.796	200.821	884.313	980.053	460.904	824.579	935.302	327.3	803.44	698.328	65.8104	603.129	732.69	141.61	646.942	758.775	205.784	579.053	781.973	213.92	524.113	731.771	287.038	852.396	709.7	592.544	634.514	735.799	586.019	645.532	749.378	505.674	565.024	766.412	536.551	482.777	740.022	517.026
507	5.06	798.706	1114.92	300.689	847.106	1110.48	243.582	821.196	1112.78	371.094	878.032	973.877	200.805	884.297	980.035	460.888	824.64	935.27	327.283	803.417	698.303	65.7726	603.101	732.692	141.595	646.936	758.766	205.768	579.055	781.947	213.908	524.129	731.753	287.026	852.386	709.686	592.545	634.503	735.798	586.001	645.553	749.344	505.66	565.035	766.403	536.53	482.806	740.014	517.024
508	5.07	798.689	1114.95	300.697	847.134	1110.49	243.576	821.222	1112.77	371.107	877.917	973.789	200.799	884.308	980.039	460.876	824.61	935.29	327.278	803.436	698.299	65.79	603.116	732.664	141.576	646.951	758.769	205.781	579.046	781.957	213.895	524.091	731.757	287.012	852.397	709.701	592.549	634.465	735.781	586.004	645.566	749.332	505.639	565.054	766.379	536.52	482.831	740	516.996
509	5.08	798.656	1114.96	300.687	847.136	1110.49	243.589	821.233	1112.77	371.12	878.177	973.969	200.766	884.314	980.057	460.879	824.539	935.337	327.288	803.448	698.322	65.8125	603.138	732.647	141.553	646.982	758.79	205.791	579.046	781.973	213.871	523.981	731.819	287.01	852.385	709.703	592.554	634.449	735.78	585.999	645.573	749.354	505.632	565.074	766.341	536.523	482.809	739.992	516.977
510	5.09	798.605	1115.01	300.702	847.143	1110.48	243.589	821.238	1112.82	371.127	878.248	974.027	200.753	884.299	980.075	460.89	824.499	935.414	327.273	803.445	698.351	65.8167	603.193	732.653	141.524	646.994	758.831	205.792	579.047	781.987	213.867	523.998	731.831	287.007	852.375	709.697	592.561	634.435	735.776	585.995	645.574	749.376	505.633	565.095	766.327	536.507	482.848	739.991	516.967
511	5.1	798.558	1115.06	300.7	847.181	1110.51	243.588	821.254	1112.85	371.127	878.254	974.059	200.752	884.321	980.106	460.895	824.434	935.483	327.267	803.463	698.37	65.8314	603.257	732.644	141.45	646.965	758.864	205.807	579.056	782.01	213.847	524.083	731.818	286.961	852.406	709.697	592.556	634.455	735.787	585.984	645.581	749.388	505.63	565.122	766.348	536.484	482.885	739.99	516.935
512	5.11	798.524	1115.09	300.667	847.197	1110.51	243.575	821.256	1112.87	371.114	878.252	974.079	200.745	884.338	980.127	460.89	824.406	935.518	327.228	803.473	698.382	65.8331	603.272	732.639	141.434	646.945	758.88	205.817	579.057	782.036	213.82	523.985	731.863	286.928	852.432	709.695	592.541	634.467	735.786	585.95	645.563	749.413	505.592	565.09	766.368	536.448	482.859	739.985	516.905
513	5.12	798.511	1115.12	300.636	847.212	1110.51	243.537	821.233	1112.89	371.091	878.264	974.092	200.722	884.351	980.135	460.88	824.328	935.528	327.22	803.453	698.382	65.8186	603.315	732.656	141.386	646.955	758.915	205.821	579.071	782.044	213.791	523.911	731.904	286.912	852.425	709.704	592.529	634.467	735.781	585.931	645.534	749.424	505.556	565.097	766.37	536.438	482.853	739.992	516.885
514	5.13	798.594	1115.1	300.594	847.234	1110.51	243.52	821.22	1112.88	371.075	878.291	974.111	200.704	884.375	980.128	460.865	824.355	935.527	327.204	803.428	698.37	65.7882	603.362	732.655	141.354	646.977	758.919	205.808	579.068	782.025	213.771	523.982	731.857	286.862	852.435	709.706	592.517	634.459	735.807	585.919	645.515	749.421	505.544	565.098	766.371	536.422	482.855	739.998	516.893
515	5.14	798.662	1115.05	300.568	847.265	1110.5	243.517	821.242	1112.87	371.068	878.304	974.126	200.692	884.373	980.106	460.839	824.412	935.508	327.174	803.437	698.351	65.7638	603.367	732.656	141.332	646.995	758.859	205.787	579.091	781.981	213.756	524.034	731.808	286.839	852.465	709.694	592.512	634.473	735.805	585.909	645.541	749.403	505.547	565.116	766.372	536.405	482.943	739.985	516.87
516	5.15	798.701	1115.02	300.57	847.286	1110.49	243.526	821.272	1112.85	371.06	878.156	974.038	200.703	884.345	980.086	460.833	824.412	935.483	327.161	803.46	698.344	65.7623	603.363	732.645	141.362	646.993	758.815	205.757	579.06	781.984	213.738	524.065	731.788	286.828	852.487	709.687	592.507	634.475	735.78	585.915	645.547	749.391	505.535	565.102	766.376	536.415	482.926	739.992	516.839
517	5.16	798.67	1115.02	300.599	847.279	1110.48	243.527	821.271	1112.83	371.062	877.993	973.912	200.721	884.327	980.075	460.839	824.375	935.479	327.148	803.448	698.334	65.7565	603.363	732.629	141.34	646.992	758.785	205.747	579.059	781.973	213.719	524.086	731.762	286.831	852.456	709.67	592.508	634.422	735.749	585.896	645.516	749.371	505.512	565.071	766.383	536.412	482.9	739.99	516.816
518	5.17	798.669	1115	300.606	847.286	1110.48	243.525	821.318	1112.79	371.08	878.228	974.085	200.683	884.31	980.049	460.822	824.382	935.459	327.128	803.399	698.316	65.7289	603.405	732.61	141.265	646.974	758.776	205.743	579.104	781.958	213.679	524.103	731.741	286.82	852.453	709.667	592.5	634.45	735.733	585.873	645.522	749.359	505.496	565.109	766.327	536.352	482.915	739.975	516.792
519	5.18	798.752	1114.97	300.594	847.297	1110.49	243.527	821.362	1112.78	371.098	878.269	974.12	200.678	884.305	980.039	460.81	824.383	935.431	327.1	803.407	698.316	65.7251	603.444	732.624	141.224	646.957	758.778	205.756	579.125	781.953	213.658	524.141	731.705	286.795	852.442	709.667	592.513	634.446	735.723	585.857	645.576	749.341	505.477	565.114	766.312	536.333	482.925	739.93	516.773
520	5.19	798.741	1115	300.61	847.294	1110.52	243.544	821.378	1112.79	371.129	878.271	974.122	200.688	884.302	980.054	460.83	824.327	935.461	327.119	803.42	698.338	65.7442	603.434	732.623	141.238	646.958	758.825	205.791	579.088	781.963	213.675	524.114	731.73	286.792	852.435	709.66	592.515	634.447	735.693	585.852	645.604	749.336	505.491	565.139	766.316	536.335	482.9	739.91	516.772
521	5.2	798.686	1115.07	300.646	847.282	1110.54	243.571	821.38	1112.83	371.163	878.256	974.133	200.69	884.296	980.082	460.86	824.174	935.538	327.179	803.419	698.374	65.7691	603.403	732.614	141.267	646.932	758.89	205.847	579.048	782.004	213.722	524.028	731.799	286.815	852.432	709.667	592.52	634.456	735.692	585.861	645.629	749.36	505.528	565.152	766.315	536.337	482.889	739.902	516.782
522	5.21	798.611	1115.12	300.67	847.276	1110.56	243.565	821.375	1112.87	371.174	878.271	974.146	200.677	884.321	980.111	460.879	824.105	935.559	327.187	803.414	698.402	65.7784	603.453	732.609	141.228	646.944	758.925	205.852	579.067	782.027	213.723	524.034	731.805	286.823	852.43	709.662	592.521	634.451	735.686	585.844	645.598	749.385	505.518	565.129	766.308	536.336	482.915	739.904	516.793
523	5.22	798.595	1115.13	300.667	847.293	1110.57	243.55	821.375	1112.89	371.16	878.287	974.165	200.658	884.34	980.127	460.868	824.058	935.588	327.168	803.391	698.388	65.7626	603.485	732.605	141.195	646.982	758.918	205.826	579.082	782.038	213.708	524.036	731.813	286.791	852.439	709.662	592.497	634.443	735.692	585.829	645.545	749.397	505.476	565.063	766.318	536.33	482.935	739.904	516.777
524	5.23	798.647	1115.12	300.62	847.299	1110.58	243.526	821.331	1112.89	371.126	878.307	974.189	200.661	884.361	980.125	460.838	824.019	935.607	327.14	803.375	698.37	65.7462	603.531	732.631	141.138	646.983	758.903	205.795	579.085	782.028	213.667	523.977	731.836	286.752	852.468	709.698	592.484	634.469	735.734	585.84	645.486	749.412	505.443	565.074	766.345	536.32	482.885	739.95	516.737
525	5.24	798.702	1115.12	300.588	847.287	1110.59	243.531	821.298	1112.88	371.106	878.282	974.199	200.661	884.38	980.11	460.816	824.017	935.578	327.123	803.371	698.366	65.7321	603.509	732.658	141.157	646.962	758.889	205.748	579.069	782.011	213.633	523.945	731.863	286.735	852.449	709.716	592.491	634.447	735.759	585.839	645.471	749.417	505.417	565.091	766.356	536.309	482.845	739.999	516.733
526	5.25	798.732	1115.09	300.581	847.301	1110.59	243.532	821.307	1112.88	371.098	878.287	974.235	200.647	884.368	980.097	460.805	824.057	935.54	327.099	803.328	698.346	65.7035	603.481	732.649	141.171	646.95	758.853	205.723	579.072	781.987	213.609	523.979	731.827	286.718	852.437	709.706	592.47	634.429	735.755	585.817	645.449	749.41	505.393	565.047	766.373	536.318	482.878	739.976	516.732
527	5.26	798.702	1115.08	300.565	847.34	1110.6	243.512	821.319	1112.87	371.094	878.293	974.223	200.648	884.362	980.081	460.803	824.035	935.534	327.103	803.294	698.312	65.693	603.519	732.616	141.128	646.946	758.816	205.743	579.093	781.974	213.595	524.029	731.779	286.681	852.463	709.686	592.456	634.435	735.739	585.788	645.477	749.415	505.402	565.035	766.35	536.297	482.878	739.955	516.713
528	5.27	798.706	1115.08	300.557	847.359	1110.58	243.505	821.331	1112.88	371.091	878.271	974.187	200.65	884.335	980.081	460.805	824.013	935.526	327.098	803.312	698.318	65.7083	603.585	732.598	141.08	646.92	758.821	205.778	579.101	781.983	213.601	524.084	731.762	286.663	852.462	709.663	592.465	634.431	735.727	585.788	645.511	749.412	505.401	565.053	766.322	536.268	482.827	739.968	516.727
529	5.28	798.681	1115.13	300.583	847.361	1110.58	243.526	821.332	1112.89	371.113	878.268	974.149	200.651	884.33	980.078	460.835	823.983	935.519	327.113	803.34	698.324	65.7347	603.637	732.602	141.073	646.917	758.855	205.815	579.077	781.982	213.63	524.026	731.785	286.688	852.48	709.642	592.469	634.424	735.715	585.8	645.518	749.399	505.41	565.066	766.296	536.259	482.847	739.94	516.744
530	5.29	798.678	1115.18	300.61	847.353	1110.58	243.531	821.359	1112.89	371.133	878.267	974.12	200.661	884.37	980.078	460.859	823.913	935.538	327.161	803.338	698.31	65.7466	603.65	732.602	141.055	646.941	758.865	205.831	579.069	781.969	213.645	523.981	731.79	286.72	852.468	709.62	592.446	634.454	735.706	585.791	645.517	749.369	505.439	565.11	766.299	536.258	482.913	739.917	516.753
531	5.3	798.722	1115.16	300.598	847.363	1110.59	243.514	821.396	1112.9	371.127	878.269	974.115	200.673	884.385	980.086	460.859	823.887	935.54	327.177	803.366	698.312	65.756	603.626	732.605	141.054	646.933	758.877	205.834	579.121	781.962	213.62	523.998	731.766	286.734	852.468	709.613	592.436	634.463	735.678	585.789	645.542	749.365	505.445	565.145	766.305	536.263	482.93	739.907	516.755
532	5.31	798.747	1115.14	300.574	847.427	1110.58	243.488	821.39	1112.91	371.103	878.304	974.109	200.673	884.393	980.093	460.856	823.893	935.551	327.179	803.387	698.315	65.7568	603.639	732.605	141.084	646.964	758.826	205.799	579.092	781.983	213.64	524.05	731.747	286.731	852.468	709.605	592.443	634.478	735.687	585.819	645.567	749.374	505.436	565.126	766.303	536.275	482.897	739.911	516.746
533	5.32	798.731	1115.16	300.567	847.394	1110.58	243.508	821.393	1112.92	371.105	878.312	974.109	200.678	884.38	980.103	460.873	823.867	935.562	327.187	803.404	698.318	65.775	603.636	732.608	141.079	646.945	758.821	205.812	579.044	782.001	213.684	524.031	731.782	286.704	852.466	709.616	592.441	634.462	735.698	585.841	645.542	749.395	505.439	565.142	766.311	536.266	482.901	739.913	516.744
534	5.33	798.698	1115.2	300.549	847.395	1110.59	243.501	821.405	1112.95	371.104	878.298	974.113	200.694	884.362	980.134	460.891	823.779	935.564	327.202	803.408	698.315	65.7763	603.677	732.596	141.038	646.956	758.879	205.815	579.027	782.005	213.694	524.037	731.793	286.699	852.482	709.626	592.433	634.443	735.696	585.819	645.488	749.408	505.445	565.144	766.304	536.26	482.91	739.928	516.74
535	5.34	798.655	1115.22	300.52	847.4	1110.59	243.466	821.391	1112.97	371.077	878.299	974.142	200.695	884.353	980.148	460.889	823.752	935.592	327.195	803.365	698.295	65.7819	603.64	732.601	141.017	646.939	758.906	205.818	579.047	782.012	213.653	524.008	731.79	286.69	852.461	709.647	592.432	634.422	735.693	585.772	645.457	749.427	505.413	565.117	766.296	536.257	482.885	739.924	516.719
536	5.35	798.644	1115.24	300.481	847.402	1110.59	243.471	821.368	1112.98	371.066	878.285	974.145	200.694	884.333	980.14	460.876	823.755	935.596	327.188	803.345	698.289	65.7964	603.651	732.616	141.01	646.925	758.878	205.809	579.061	782.018	213.623	523.955	731.828	286.68	852.451	709.665	592.435	634.398	735.697	585.76	645.458	749.437	505.412	565.081	766.295	536.253	482.837	739.97	516.706
537	5.36	798.651	1115.21	300.483	847.41	1110.57	243.466	821.346	1112.98	371.049	878.286	974.105	200.693	884.327	980.133	460.879	823.723	935.568	327.211	803.359	698.288	65.8068	603.667	732.626	141.029	646.934	758.861	205.789	579.051	781.993	213.628	523.921	731.848	286.682	852.445	709.666	592.445	634.381	735.72	585.759	645.459	749.446	505.418	565.029	766.337	536.298	482.856	739.964	516.71
538	5.37	798.728	1115.16	300.457	847.428	1110.56	243.454	821.336	1112.96	371.033	878.306	974.098	200.697	884.352	980.13	460.88	823.698	935.564	327.202	803.356	698.26	65.796	603.635	732.633	141.059	646.949	758.852	205.771	579.072	781.973	213.609	523.957	731.826	286.669	852.449	709.669	592.465	634.409	735.743	585.774	645.432	749.445	505.413	565.004	766.328	536.301	482.856	739.959	516.724
539	5.38	798.787	1115.1	300.415	847.436	1110.56	243.433	821.333	1112.94	371.015	878.3	974.097	200.692	884.347	980.105	460.864	823.81	935.505	327.176	803.347	698.234	65.7787	603.674	732.633	141.043	646.946	758.814	205.774	579.096	781.954	213.593	524.03	731.765	286.659	852.43	709.665	592.485	634.397	735.737	585.764	645.486	749.416	505.416	565.019	766.308	536.276	482.849	739.952	516.732
540	5.39	798.742	1115.1	300.421	847.437	1110.55	243.423	821.322	1112.93	371.002	878.287	974.081	200.71	884.355	980.092	460.856	823.841	935.465	327.178	803.338	698.224	65.793	603.694	732.626	141.016	646.95	758.801	205.774	579.081	781.961	213.618	524.067	731.723	286.645	852.435	709.675	592.499	634.414	735.725	585.784	645.521	749.393	505.417	565.064	766.293	536.268	482.87	739.945	516.722
541	5.4	798.729	1115.16	300.448	847.423	1110.57	243.444	821.349	1112.93	371.006	878.324	974.061	200.719	884.377	980.099	460.88	823.806	935.48	327.196	803.373	698.241	65.8316	603.575	732.656	141.071	646.977	758.823	205.79	579.065	781.981	213.641	524.079	731.719	286.666	852.459	709.657	592.51	634.44	735.703	585.805	645.51	749.403	505.432	565.084	766.292	536.3	482.871	739.945	516.728
542	5.41	798.674	1115.23	300.48	847.429	1110.59	243.459	821.359	1112.96	371.03	878.313	974.041	200.716	884.398	980.117	460.905	823.78	935.509	327.208	803.385	698.248	65.8429	603.542	732.677	141.081	646.941	758.864	205.825	579.071	782	213.656	524.031	731.753	286.695	852.482	709.63	592.512	634.457	735.69	585.809	645.552	749.412	505.463	565.091	766.295	536.314	482.898	739.925	516.741
543	5.42	798.69	1115.22	300.451	847.422	1110.59	243.444	821.344	1112.99	371.025	878.301	974.017	200.715	884.384	980.124	460.904	823.748	935.52	327.198	803.367	698.251	65.8418	603.614	732.662	141.04	646.882	758.904	205.854	579.048	782.028	213.645	523.991	731.795	286.687	852.468	709.632	592.492	634.425	735.673	585.796	645.532	749.424	505.465	565.109	766.298	536.308	482.893	739.907	516.724
544	5.43	798.69	1115.24	300.425	847.422	1110.6	243.413	821.334	1113	371.011	878.319	974.01	200.712	884.376	980.136	460.903	823.721	935.53	327.184	803.349	698.252	65.8378	603.676	732.637	141.004	646.887	758.915	205.855	579.032	782.033	213.636	523.941	731.799	286.695	852.435	709.618	592.47	634.399	735.671	585.771	645.497	749.44	505.448	565.099	766.29	536.287	482.863	739.906	516.71
545	5.44	798.777	1115.23	300.409	847.44	1110.61	243.429	821.335	1113.02	371.008	878.322	974.008	200.706	884.364	980.122	460.903	823.71	935.509	327.203	803.348	698.24	65.8249	603.698	732.607	140.994	646.935	758.874	205.821	579.063	782	213.625	524.002	731.774	286.685	852.451	709.606	592.475	634.392	735.675	585.78	645.498	749.436	505.45	565.083	766.295	536.289	482.845	739.916	516.731
546	5.45	798.768	1115.19	300.417	847.424	1110.59	243.463	821.344	1113.01	371.022	878.328	974.009	200.715	884.37	980.105	460.898	823.711	935.479	327.219	803.363	698.241	65.8329	603.641	732.606	141.043	646.955	758.85	205.809	579.067	781.979	213.645	524.058	731.759	286.733	852.489	709.617	592.465	634.425	735.69	585.777	645.489	749.42	505.444	565.053	766.313	536.308	482.853	739.949	516.751
547	5.46	798.761	1115.14	300.422	847.409	1110.58	243.447	821.315	1112.98	371.005	878.197	973.897	200.721	884.351	980.091	460.871	823.694	935.465	327.209	803.328	698.209	65.8213	603.596	732.625	141.086	646.946	758.828	205.811	579.045	781.968	213.647	524.108	731.747	286.705	852.479	709.627	592.435	634.413	735.698	585.771	645.443	749.418	505.442	565.068	766.318	536.305	482.915	739.944	516.758
548	5.47	798.778	1115.12	300.391	847.401	1110.57	243.423	821.295	1112.96	370.986	878.004	973.761	200.733	884.352	980.071	460.857	823.674	935.425	327.186	803.289	698.153	65.7985	603.616	732.637	141.075	646.944	758.794	205.78	579.049	781.948	213.604	524.13	731.751	286.674	852.479	709.618	592.417	634.414	735.711	585.769	645.456	749.4	505.422	565.078	766.315	536.291	482.904	739.944	516.756
549	5.48	798.794	1115.13	300.38	847.399	1110.58	243.432	821.295	1112.96	370.985	878.266	973.933	200.703	884.357	980.063	460.852	823.7	935.407	327.168	803.279	698.12	65.7973	603.646	732.66	141.037	646.959	758.777	205.754	579.082	781.931	213.574	524.038	731.765	286.665	852.48	709.617	592.409	634.445	735.726	585.769	645.465	749.389	505.383	565.104	766.326	536.279	482.878	739.958	516.733
550	5.49	798.752	1115.17	300.401	847.38	1110.6	243.441	821.29	1112.97	370.983	878.335	973.953	200.692	884.375	980.072	460.85	823.635	935.433	327.188	803.29	698.116	65.7995	603.645	732.689	141.037	646.957	758.805	205.755	579.094	781.944	213.586	523.976	731.77	286.675	852.477	709.606	592.385	634.468	735.727	585.769	645.459	749.397	505.385	565.115	766.31	536.262	482.9	739.941	516.708
551	5.5	798.672	1115.2	300.427	847.337	1110.61	243.435	821.283	1112.98	370.986	878.34	973.959	200.685	884.369	980.087	460.848	823.622	935.456	327.191	803.299	698.112	65.7967	603.573	732.669	141.073	646.965	758.835	205.773	579.078	781.963	213.582	524.007	731.76	286.681	852.472	709.595	592.359	634.434	735.704	585.754	645.448	749.418	505.374	565.133	766.313	536.243	482.854	739.936	516.709
552	5.51	798.644	1115.23	300.449	847.348	1110.61	243.417	821.318	1113	371.012	878.323	973.95	200.685	884.37	980.095	460.864	823.568	935.467	327.202	803.306	698.126	65.8003	603.635	732.589	141.053	646.933	758.859	205.788	579.042	781.993	213.595	524.009	731.785	286.693	852.462	709.582	592.36	634.424	735.691	585.76	645.435	749.414	505.368	565.111	766.308	536.254	482.856	739.922	516.727
553	5.52	798.663	1115.26	300.506	847.38	1110.61	243.443	821.353	1113	371.058	878.306	973.909	200.703	884.371	980.102	460.884	823.571	935.469	327.237	803.358	698.143	65.8311	603.628	732.583	141.072	646.935	758.893	205.812	579.032	782.014	213.637	524.015	731.785	286.719	852.473	709.574	592.378	634.427	735.688	585.809	645.483	749.413	505.413	565.125	766.292	536.277	482.904	739.893	516.728
554	5.53	798.71	1115.25	300.536	847.385	1110.62	243.472	821.38	1113	371.087	878.334	973.878	200.702	884.395	980.11	460.886	823.557	935.448	327.268	803.384	698.154	65.8602	603.599	732.571	141.077	646.944	758.917	205.869	579.021	782.011	213.664	524.015	731.8	286.761	852.5	709.585	592.382	634.456	735.679	585.824	645.529	749.395	505.468	565.165	766.283	536.292	482.9	739.879	516.757
555	5.54	798.735	1115.24	300.515	847.373	1110.64	243.48	821.351	1112.99	371.082	878.181	973.775	200.726	884.378	980.107	460.88	823.516	935.432	327.255	803.355	698.14	65.8479	603.614	732.567	141.043	646.911	758.903	205.878	578.993	782.008	213.667	524.001	731.776	286.745	852.51	709.601	592.376	634.423	735.669	585.8	645.542	749.385	505.464	565.121	766.288	536.305	482.895	739.892	516.779
556	5.55	798.711	1115.24	300.488	847.39	1110.65	243.452	821.326	1112.98	371.054	877.973	973.643	200.757	884.346	980.086	460.878	823.55	935.409	327.229	803.327	698.101	65.8337	603.633	732.58	141.048	646.915	758.839	205.85	579.043	781.994	213.625	524.003	731.767	286.71	852.48	709.603	592.384	634.388	735.677	585.779	645.496	749.397	505.433	565.066	766.298	536.3	482.85	739.92	516.763
557	5.56	798.691	1115.22	300.482	847.396	1110.64	243.442	821.283	1112.98	371.029	878.095	973.696	200.75	884.347	980.072	460.873	823.519	935.404	327.222	803.295	698.046	65.8348	603.623	732.567	141.066	646.934	758.808	205.824	579.078	781.987	213.613	524.042	731.747	286.689	852.477	709.614	592.4	634.4	735.696	585.772	645.478	749.397	505.446	565.058	766.312	536.31	482.84	739.93	516.739
558	5.57	798.67	1115.24	300.491	847.416	1110.64	243.457	821.278	1113	371.029	877.832	973.519	200.786	884.358	980.078	460.87	823.451	935.401	327.24	803.288	698.015	65.8389	603.567	732.594	141.094	646.934	758.81	205.797	579.072	781.986	213.602	524.017	731.761	286.702	852.484	709.616	592.402	634.409	735.721	585.807	645.463	749.425	505.447	565.043	766.349	536.311	482.802	739.953	516.749
559	5.58	798.617	1115.25	300.473	847.422	1110.65	243.434	821.241	1113.01	371.011	877.753	973.468	200.784	884.342	980.082	460.873	823.412	935.384	327.24	803.287	697.996	65.8285	603.594	732.612	141.045	646.954	758.815	205.78	579.037	781.981	213.602	523.961	731.775	286.69	852.475	709.592	592.383	634.421	735.718	585.806	645.447	749.448	505.423	565.07	766.357	536.285	482.758	739.978	516.767
560	5.59	798.678	1115.22	300.426	847.381	1110.66	243.425	821.225	1113.02	370.99	877.718	973.44	200.787	884.332	980.064	460.863	823.401	935.359	327.228	803.267	697.98	65.8367	603.613	732.611	140.993	646.956	758.818	205.763	579.021	781.974	213.579	523.986	731.746	286.658	852.45	709.575	592.401	634.39	735.699	585.793	645.429	749.448	505.403	565.05	766.332	536.283	482.737	739.978	516.769
561	5.6	798.747	1115.21	300.401	847.396	1110.65	243.444	821.25	1113.02	370.988	877.869	973.515	200.785	884.341	980.049	460.885	823.424	935.33	327.249	803.3	697.967	65.8628	603.663	732.605	141.008	646.976	758.819	205.765	579.054	781.971	213.592	524.076	731.717	286.667	852.471	709.587	592.43	634.373	735.67	585.784	645.478	749.419	505.401	565.07	766.319	536.289	482.793	739.957	516.768
562	5.61	798.783	1115.21	300.401	847.406	1110.65	243.455	821.279	1113.03	371.011	878.2	973.727	200.761	884.359	980.057	460.917	823.371	935.329	327.286	803.338	697.986	65.8912	603.676	732.61	141.023	646.966	758.832	205.813	579.088	781.976	213.606	524.139	731.721	286.703	852.484	709.578	592.431	634.408	735.669	585.794	645.5	749.408	505.427	565.089	766.332	536.307	482.841	739.963	516.769
563	5.62	798.729	1115.27	300.411	847.369	1110.67	243.476	821.271	1113.05	371.017	878.137	973.687	200.788	884.333	980.069	460.939	823.274	935.335	327.318	803.347	697.996	65.9147	603.636	732.623	141.039	646.938	758.875	205.855	579.041	782.01	213.628	524.017	731.787	286.721	852.468	709.568	592.441	634.426	735.678	585.812	645.484	749.424	505.435	565.064	766.344	536.333	482.834	739.967	516.756
564	5.63	798.681	1115.31	300.431	847.394	1110.68	243.478	821.245	1113.07	371.009	877.804	973.479	200.857	884.315	980.082	460.963	823.236	935.323	327.324	803.347	697.982	65.9356	603.68	732.604	141.04	646.937	758.88	205.844	579	782.029	213.633	523.915	731.84	286.717	852.443	709.566	592.446	634.426	735.681	585.812	645.474	749.428	505.44	565.057	766.338	536.331	482.826	739.934	516.748
565	5.64	798.665	1115.34	300.45	847.437	1110.69	243.47	821.234	1113.07	371.017	877.902	973.509	200.858	884.318	980.082	460.968	823.209	935.305	327.333	803.365	697.976	65.9371	603.716	732.607	141.013	646.96	758.86	205.834	579.038	782.013	213.625	523.939	731.829	286.712	852.451	709.577	592.445	634.399	735.666	585.801	645.521	749.431	505.447	565.098	766.329	536.322	482.846	739.927	516.756
566	5.65	798.73	1115.33	300.441	847.477	1110.7	243.469	821.251	1113.08	371.024	878.235	973.67	200.802	884.31	980.088	460.966	823.202	935.288	327.344	803.39	697.966	65.9362	603.721	732.611	141.02	646.976	758.857	205.834	579.063	782.012	213.61	523.998	731.817	286.712	852.453	709.58	592.441	634.426	735.684	585.789	645.529	749.422	505.437	565.083	766.32	536.298	482.881	739.914	516.751
567	5.66	798.716	1115.31	300.449	847.436	1110.72	243.487	821.233	1113.07	371.046	878.302	973.698	200.783	884.267	980.069	460.95	823.159	935.273	327.335	803.372	697.966	65.9534	603.715	732.614	141.01	646.917	758.862	205.855	579.006	782.015	213.61	523.922	731.833	286.708	852.401	709.562	592.451	634.405	735.677	585.781	645.469	749.412	505.439	565.08	766.308	536.283	482.881	739.917	516.734
568	5.67	798.666	1115.31	300.484	847.415	1110.71	243.502	821.216	1113.05	371.07	878.166	973.611	200.813	884.243	980.047	460.961	823.101	935.246	327.343	803.343	697.94	65.9564	603.726	732.603	140.974	646.895	758.85	205.859	579.013	781.983	213.624	523.983	731.779	286.675	852.379	709.562	592.462	634.393	735.676	585.787	645.455	749.41	505.442	565.08	766.314	536.291	482.865	739.913	516.743
569	5.68	798.704	1115.29	300.507	847.431	1110.72	243.53	821.245	1113.03	371.082	877.869	973.384	200.872	884.279	980.03	460.961	823.146	935.192	327.359	803.357	697.898	65.9533	603.712	732.608	141.003	646.949	758.824	205.852	579.08	781.96	213.628	524.096	731.734	286.664	852.428	709.582	592.493	634.416	735.672	585.791	645.523	749.396	505.445	565.106	766.329	536.303	482.882	739.914	516.751
570	5.69	798.817	1115.25	300.511	847.458	1110.71	243.543	821.255	1113.02	371.082	877.845	973.314	200.851	884.287	980.015	460.946	823.157	935.149	327.355	803.372	697.87	65.9453	603.703	732.606	141.019	646.989	758.773	205.832	579.102	781.961	213.603	524.095	731.738	286.675	852.446	709.565	592.486	634.373	735.655	585.787	645.566	749.388	505.445	565.083	766.309	536.292	482.903	739.89	516.738
571	5.7	798.759	1115.29	300.511	847.456	1110.72	243.537	821.23	1113.02	371.088	877.808	973.299	200.854	884.252	980.011	460.938	823.071	935.144	327.355	803.361	697.84	65.9557	603.716	732.608	141.006	646.976	758.751	205.801	579.064	781.973	213.598	524.024	731.763	286.671	852.432	709.542	592.474	634.346	735.65	585.772	645.517	749.407	505.43	565.049	766.319	536.304	482.878	739.908	516.736
572	5.71	798.685	1115.32	300.505	847.469	1110.74	243.526	821.226	1113.05	371.09	877.784	973.328	200.856	884.241	980.022	460.94	823.022	935.148	327.343	803.396	697.83	65.9755	603.736	732.628	140.974	646.983	758.788	205.819	579.061	781.986	213.589	523.927	731.803	286.643	852.46	709.548	592.461	634.397	735.673	585.773	645.443	749.416	505.421	565.08	766.308	536.3	482.86	739.924	516.717
573	5.72	798.656	1115.35	300.519	847.493	1110.76	243.54	821.227	1113.07	371.099	877.789	973.325	200.876	884.272	980.03	460.957	822.959	935.161	327.346	803.458	697.832	65.9891	603.758	732.667	140.976	646.987	758.819	205.817	579.061	781.978	213.594	523.879	731.85	286.652	852.5	709.561	592.457	634.421	735.683	585.785	645.464	749.422	505.425	565.072	766.325	536.308	482.867	739.939	516.72
574	5.73	798.65	1115.4	300.527	847.482	1110.78	243.563	821.234	1113.09	371.107	877.956	973.403	200.876	884.302	980.046	460.967	822.949	935.158	327.36	803.466	697.824	66.0006	603.732	732.654	140.986	646.985	758.827	205.811	579.068	781.998	213.597	523.953	731.819	286.667	852.491	709.548	592.466	634.415	735.686	585.778	645.452	749.421	505.443	565.069	766.315	536.301	482.875	739.937	516.709
575	5.74	798.62	1115.43	300.534	847.465	1110.78	243.565	821.274	1113.1	371.123	878.121	973.498	200.849	884.298	980.04	460.957	822.949	935.137	327.376	803.44	697.811	66.0108	603.711	732.655	140.989	646.989	758.844	205.817	579.035	782.029	213.592	523.955	731.808	286.687	852.468	709.521	592.448	634.408	735.664	585.785	645.456	749.434	505.437	565.055	766.314	536.297	482.899	739.899	516.741
576	5.75	798.635	1115.44	300.529	847.503	1110.78	243.543	821.289	1113.1	371.118	878.008	973.406	200.858	884.31	980.033	460.97	822.913	935.115	327.382	803.435	697.799	66.0155	603.762	732.645	140.946	646.98	758.851	205.832	579.048	782.008	213.586	524.057	731.767	286.656	852.482	709.51	592.444	634.442	735.637	585.782	645.468	749.442	505.423	565.047	766.312	536.28	482.912	739.876	516.742
577	5.76	798.7	1115.43	300.515	847.535	1110.77	243.527	821.308	1113.11	371.11	878.115	973.463	200.844	884.337	980.016	460.979	822.891	935.076	327.405	803.43	697.798	66.0134	603.804	732.622	140.932	646.965	758.83	205.893	579.059	781.998	213.622	524.104	731.735	286.641	852.483	709.508	592.458	634.442	735.634	585.76	645.489	749.431	505.427	565.043	766.315	536.285	482.908	739.884	516.752
578	5.77	798.742	1115.44	300.516	847.49	1110.77	243.547	821.312	1113.13	371.114	877.999	973.386	200.869	884.321	980.028	460.997	822.895	935.053	327.415	803.424	697.775	66.0078	603.774	732.633	140.978	646.98	758.83	205.871	579.059	782.002	213.642	524.016	731.761	286.655	852.502	709.501	592.446	634.439	735.634	585.786	645.495	749.421	505.45	565.045	766.314	536.313	482.905	739.903	516.766
579	5.78	798.756	1115.48	300.51	847.473	1110.79	243.532	821.297	1113.14	371.099	878.089	973.426	200.847	884.282	980.039	460.997	822.826	935.039	327.414	803.406	697.752	66.0143	603.777	732.643	140.993	646.959	758.832	205.858	579.029	782.005	213.65	523.939	731.798	286.703	852.488	709.502	592.424	634.414	735.648	585.796	645.493	749.426	505.465	565.045	766.311	536.321	482.902	739.915	516.752
580	5.79	798.747	1115.48	300.471	847.487	1110.8	243.486	821.285	1113.14	371.057	877.814	973.25	200.87	884.258	980.018	460.977	822.775	935.003	327.401	803.395	697.711	66.0071	603.738	732.654	140.984	646.957	758.786	205.826	579.031	782.001	213.636	523.978	731.764	286.686	852.479	709.511	592.407	634.377	735.652	585.772	645.486	749.421	505.449	565.06	766.337	536.321	482.89	739.926	516.735
581	5.8	798.752	1115.46	300.407	847.5	1110.79	243.453	821.306	1113.14	371.01	877.764	973.203	200.85	884.268	980.004	460.945	822.774	934.952	327.391	803.386	697.656	65.9778	603.743	732.657	140.943	646.986	758.748	205.786	579.106	781.97	213.572	524.042	731.741	286.627	852.476	709.53	592.413	634.387	735.666	585.748	645.498	749.411	505.419	565.039	766.329	536.307	482.885	739.945	516.738
582	5.81	798.722	1115.48	300.363	847.494	1110.82	243.414	821.28	1113.16	370.98	877.754	973.175	200.84	884.262	980.01	460.937	822.75	934.921	327.399	803.383	697.628	65.9589	603.741	732.644	140.948	646.974	758.74	205.794	579.097	781.974	213.545	524.094	731.725	286.622	852.464	709.547	592.411	634.384	735.673	585.753	645.479	749.424	505.424	565.007	766.319	536.299	482.831	739.963	516.75
583	5.82	798.689	1115.49	300.358	847.468	1110.83	243.391	821.251	1113.2	370.963	877.723	973.142	200.857	884.235	980.033	460.944	822.696	934.907	327.421	803.391	697.619	65.9742	603.763	732.638	140.927	646.975	758.794	205.81	579.046	781.995	213.564	524.06	731.745	286.627	852.438	709.536	592.407	634.392	735.669	585.748	645.495	749.423	505.425	565.018	766.321	536.298	482.832	739.949	516.746
584	5.83	798.688	1115.53	300.347	847.451	1110.81	243.39	821.256	1113.23	370.946	877.684	973.123	200.878	884.232	980.067	460.957	822.645	934.9	327.436	803.414	697.622	66.0032	603.728	732.616	140.934	646.954	758.816	205.843	579.045	782.003	213.578	523.959	731.785	286.654	852.434	709.545	592.433	634.414	735.65	585.757	645.476	749.424	505.44	565.052	766.306	536.297	482.851	739.927	516.737
585	5.84	798.659	1115.54	300.311	847.439	1110.78	243.36	821.257	1113.24	370.922	877.697	973.125	200.884	884.227	980.073	460.968	822.569	934.884	327.455	803.441	697.629	66.0259	603.726	732.616	140.962	646.951	758.843	205.894	579.035	782.011	213.621	523.894	731.818	286.697	852.421	709.545	592.444	634.41	735.643	585.789	645.44	749.436	505.458	565.034	766.318	536.288	482.86	739.901	516.751
586	5.85	798.669	1115.52	300.291	847.435	1110.77	243.344	821.255	1113.22	370.902	877.705	973.109	200.877	884.238	980.08	460.952	822.519	934.871	327.461	803.451	697.623	66.0456	603.714	732.611	140.989	646.96	758.864	205.904	578.999	782.024	213.641	523.899	731.823	286.718	852.434	709.544	592.441	634.383	735.648	585.795	645.456	749.425	505.47	565.038	766.31	536.3	482.85	739.897	516.771
587	5.86	798.677	1115.5	300.263	847.415	1110.78	243.327	821.243	1113.21	370.877	877.711	973.078	200.88	884.263	980.085	460.935	822.533	934.858	327.478	803.46	697.596	66.061	603.679	732.636	140.998	646.927	758.868	205.905	578.968	782.032	213.656	523.968	731.793	286.716	852.476	709.561	592.447	634.369	735.649	585.779	645.431	749.423	505.471	565.06	766.286	536.299	482.845	739.9	516.771
588	5.87	798.692	1115.5	300.195	847.389	1110.78	243.319	821.238	1113.22	370.841	877.745	973.051	200.845	884.297	980.066	460.91	822.553	934.843	327.454	803.437	697.537	66.0558	603.664	732.652	141.035	646.924	758.849	205.899	578.98	782.021	213.671	524.053	731.757	286.676	852.461	709.58	592.453	634.387	735.648	585.79	645.477	749.427	505.474	565.078	766.275	536.292	482.865	739.909	516.737
589	5.88	798.743	1115.47	300.137	847.41	1110.77	243.281	821.249	1113.19	370.803	877.784	973.02	200.802	884.325	980.044	460.892	822.588	934.8	327.412	803.446	697.476	66.0469	603.669	732.663	141.035	646.965	758.801	205.863	579.013	781.993	213.644	524.107	731.722	286.655	852.451	709.605	592.474	634.402	735.639	585.816	645.5	749.419	505.467	565.064	766.299	536.307	482.905	739.903	516.73
590	5.89	798.802	1115.41	300.088	847.454	1110.76	243.239	821.25	1113.18	370.762	877.824	973	200.781	884.329	980.031	460.864	822.639	934.772	327.373	803.469	697.447	66.045	603.683	732.69	141.053	646.969	758.745	205.848	579.052	781.99	213.622	524.144	731.681	286.671	852.453	709.619	592.48	634.429	735.645	585.808	645.51	749.411	505.463	565.055	766.314	536.336	482.909	739.913	516.756
591	5.9	798.774	1115.42	300.06	847.456	1110.76	243.23	821.235	1113.19	370.729	877.835	972.988	200.758	884.329	980.038	460.843	822.621	934.745	327.385	803.463	697.422	66.0582	603.705	732.706	141.045	646.98	758.74	205.866	579.074	781.99	213.625	524.01	731.737	286.713	852.471	709.613	592.466	634.437	735.658	585.78	645.517	749.402	505.452	565.054	766.321	536.333	482.887	739.923	516.782
592	5.91	798.724	1115.47	300.042	847.44	1110.79	243.221	821.21	1113.22	370.715	877.806	972.978	200.769	884.307	980.053	460.843	822.517	934.761	327.394	803.471	697.406	66.0967	603.742	732.694	141.007	646.97	758.787	205.882	579.06	782.015	213.638	524.006	731.753	286.705	852.468	709.626	592.462	634.443	735.655	585.775	645.501	749.424	505.472	565.039	766.32	536.334	482.876	739.92	516.776
593	5.92	798.722	1115.52	300.029	847.412	1110.79	243.201	821.214	1113.25	370.71	877.801	972.969	200.76	884.284	980.07	460.844	822.478	934.77	327.38	803.498	697.404	66.1272	603.789	732.666	140.988	646.977	758.802	205.891	579.051	782.043	213.633	523.996	731.769	286.71	852.459	709.631	592.448	634.445	735.65	585.778	645.471	749.439	505.476	565.044	766.32	536.322	482.878	739.91	516.769
594	5.93	798.74	1115.54	299.994	847.432	1110.77	243.185	821.214	1113.26	370.681	877.812	972.949	200.751	884.289	980.077	460.833	822.54	934.747	327.345	803.534	697.386	66.128	603.791	732.683	140.987	646.946	758.814	205.914	579.088	782.032	213.606	523.968	731.787	286.701	852.474	709.625	592.452	634.448	735.675	585.78	645.462	749.453	505.457	565.074	766.315	536.305	482.814	739.94	516.779
595	5.94	798.7	1115.55	299.958	847.476	1110.77	243.159	821.227	1113.27	370.665	877.843	972.914	200.733	884.286	980.079	460.82	822.491	934.748	327.338	803.559	697.364	66.1334	603.794	732.709	141.004	646.989	758.826	205.893	579.082	782.009	213.628	523.934	731.825	286.705	852.476	709.62	592.445	634.457	735.697	585.779	645.45	749.469	505.447	565.092	766.346	536.319	482.773	739.979	516.758
596	5.95	798.67	1115.58	299.963	847.487	1110.8	243.151	821.222	1113.29	370.656	877.839	972.913	200.74	884.261	980.085	460.822	822.374	934.768	327.352	803.548	697.352	66.1452	603.75	732.686	141.017	647.011	758.836	205.873	579.038	782.015	213.643	523.954	731.844	286.698	852.501	709.634	592.419	634.463	735.727	585.783	645.466	749.477	505.439	565.061	766.351	536.328	482.781	739.995	516.767
597	5.96	798.669	1115.59	299.947	847.475	1110.79	243.149	821.209	1113.31	370.636	877.847	972.918	200.742	884.257	980.078	460.814	822.319	934.756	327.35	803.522	697.322	66.1418	603.768	732.69	141.025	647.004	758.84	205.863	579.015	782.036	213.651	523.895	731.875	286.697	852.509	709.629	592.397	634.472	735.731	585.772	645.46	749.443	505.433	565.046	766.337	536.324	482.82	739.952	516.75
598	5.97	798.72	1115.59	299.921	847.469	1110.78	243.115	821.213	1113.31	370.618	877.849	972.879	200.71	884.285	980.07	460.805	822.356	934.719	327.341	803.527	697.288	66.1362	603.779	732.675	141.031	647.022	758.828	205.836	579.007	782.038	213.658	523.893	731.842	286.68	852.5	709.608	592.393	634.474	735.704	585.749	645.475	749.419	505.409	565.041	766.33	536.295	482.853	739.921	516.745
599	5.98	798.707	1115.58	299.905	847.46	1110.78	243.111	821.208	1113.29	370.607	877.84	972.854	200.713	884.298	980.058	460.796	822.369	934.688	327.328	803.519	697.262	66.1376	603.739	732.668	141.036	647.015	758.792	205.847	579.034	782.025	213.642	523.989	731.781	286.66	852.502	709.601	592.387	634.429	735.686	585.767	645.489	749.402	505.417	565.061	766.315	536.299	482.803	739.929	516.721
600	5.99	798.752	1115.53	299.916	847.46	1110.78	243.13	821.224	1113.28	370.624	877.81	972.845	200.727	884.273	980.037	460.794	822.353	934.655	327.342	803.479	697.241	66.1351	603.674	732.664	141.075	646.979	758.755	205.879	579.04	781.998	213.639	524.051	731.741	286.674	852.483	709.576	592.379	634.389	735.67	585.778	645.494	749.392	505.435	565.095	766.303	536.304	482.792	739.941	516.759
601	6	798.782	1115.52	299.969	847.44	1110.77	243.169	821.248	1113.27	370.657	877.792	972.832	200.727	884.255	980.015	460.795	822.404	934.621	327.369	803.475	697.228	66.1448	603.653	732.655	141.119	646.993	758.745	205.882	579.053	781.986	213.663	524.093	731.707	286.715	852.483	709.557	592.381	634.386	735.657	585.77	645.493	749.388	505.453	565.11	766.315	536.328	482.843	739.951	516.797
602	6.01	798.804	1115.51	299.992	847.447	1110.78	243.197	821.273	1113.27	370.67	877.796	972.813	200.729	884.286	980.001	460.784	822.428	934.598	327.368	803.527	697.233	66.1506	603.658	732.657	141.122	647.021	758.752	205.912	579.072	781.984	213.691	524.101	731.692	286.726	852.5	709.547	592.401	634.398	735.649	585.784	645.508	749.386	505.467	565.082	766.313	536.335	482.886	739.913	516.803
603	6.02	798.787	1115.53	299.974	847.45	1110.8	243.188	821.249	1113.27	370.669	877.785	972.82	200.734	884.282	979.987	460.772	822.379	934.611	327.363	803.535	697.21	66.169	603.66	732.706	141.126	646.997	758.77	205.933	579.074	781.984	213.675	524.045	731.732	286.721	852.517	709.552	592.409	634.431	735.653	585.783	645.483	749.387	505.453	565.084	766.313	536.322	482.909	739.897	516.795
604	6.03	798.725	1115.58	299.994	847.452	1110.81	243.178	821.227	1113.3	370.683	877.803	972.837	200.712	884.279	979.991	460.773	822.346	934.615	327.37	803.518	697.208	66.17	603.692	732.731	141.095	646.987	758.783	205.901	579.059	782.005	213.668	524.095	731.724	286.678	852.492	709.536	592.39	634.463	735.671	585.783	645.489	749.394	505.451	565.085	766.307	536.322	482.922	739.893	516.782
605	6.04	798.736	1115.63	300.021	847.45	1110.83	243.173	821.235	1113.31	370.699	877.816	972.855	200.734	884.323	980.006	460.783	822.314	934.63	327.379	803.52	697.212	66.1669	603.738	732.716	141.058	646.998	758.803	205.885	579.04	782.041	213.661	524.043	731.769	286.68	852.471	709.544	592.38	634.473	735.686	585.791	645.483	749.41	505.439	565.147	766.313	536.317	482.936	739.91	516.789
606	6.05	798.714	1115.66	300.035	847.419	1110.86	243.187	821.24	1113.32	370.724	877.803	972.849	200.747	884.316	980.015	460.792	822.313	934.631	327.369	803.539	697.199	66.1872	603.746	732.733	141.048	647.023	758.824	205.876	579.065	782.052	213.649	523.949	731.828	286.711	852.475	709.54	592.378	634.457	735.699	585.803	645.466	749.418	505.422	565.125	766.339	536.332	482.911	739.953	516.787
607	6.06	798.648	1115.63	300.041	847.411	1110.86	243.208	821.223	1113.31	370.723	877.791	972.829	200.735	884.301	980.007	460.788	822.344	934.609	327.361	803.558	697.192	66.2095	603.746	732.746	141.026	647.02	758.827	205.875	579.073	782.039	213.665	523.912	731.849	286.707	852.493	709.528	592.372	634.441	735.697	585.794	645.484	749.413	505.409	565.049	766.336	536.34	482.896	739.972	516.776
608	6.07	798.633	1115.6	300.038	847.413	1110.85	243.219	821.199	1113.3	370.722	877.78	972.794	200.726	884.284	979.998	460.789	822.292	934.599	327.365	803.525	697.152	66.2029	603.726	732.733	140.983	646.991	758.831	205.901	579.037	782.038	213.665	523.872	731.869	286.699	852.52	709.529	592.374	634.427	735.672	585.775	645.506	749.413	505.401	565.041	766.322	536.318	482.853	739.962	516.778
609	6.08	798.681	1115.59	300.069	847.434	1110.83	243.239	821.207	1113.28	370.748	877.74	972.774	200.749	884.24	979.994	460.792	822.278	934.573	327.366	803.508	697.134	66.2107	603.758	732.723	140.965	646.969	758.833	205.924	579.028	782.044	213.666	523.907	731.85	286.687	852.524	709.526	592.387	634.468	735.677	585.776	645.485	749.409	505.402	565.069	766.315	536.309	482.894	739.953	516.768
610	6.09	798.661	1115.6	300.089	847.412	1110.82	243.255	821.21	1113.26	370.787	877.745	972.767	200.766	884.203	979.971	460.809	822.266	934.54	327.384	803.543	697.138	66.2335	603.752	732.713	141.002	646.992	758.846	205.937	579.06	782.045	213.672	523.961	731.799	286.672	852.537	709.503	592.393	634.468	735.689	585.786	645.505	749.407	505.421	565.065	766.304	536.313	482.938	739.926	516.77
611	6.1	798.569	1115.6	300.127	847.401	1110.82	243.258	821.151	1113.26	370.802	877.73	972.744	200.772	884.194	979.954	460.814	822.192	934.541	327.401	803.564	697.12	66.2608	603.69	732.708	141.064	646.98	758.839	205.931	579.047	782.041	213.697	523.887	731.818	286.692	852.521	709.474	592.374	634.432	735.656	585.795	645.502	749.405	505.436	565.073	766.296	536.305	482.872	739.931	516.767
612	6.11	798.543	1115.56	300.16	847.347	1110.83	243.269	821.107	1113.25	370.804	877.718	972.742	200.777	884.162	979.938	460.823	822.171	934.521	327.409	803.561	697.085	66.2711	603.741	732.725	141.064	646.997	758.806	205.908	579.027	782.028	213.699	523.901	731.826	286.704	852.488	709.444	592.368	634.401	735.652	585.78	645.501	749.393	505.438	565.095	766.303	536.3	482.845	739.932	516.757
613	6.12	798.589	1115.52	300.17	847.337	1110.82	243.287	821.109	1113.22	370.815	877.7	972.731	200.782	884.112	979.907	460.822	822.252	934.465	327.39	803.517	697.032	66.2474	603.763	732.72	141.056	647.024	758.747	205.915	579.051	781.986	213.682	523.974	731.777	286.712	852.469	709.416	592.371	634.387	735.658	585.79	645.47	749.397	505.432	565.034	766.311	536.316	482.894	739.905	516.768
614	6.13	798.63	1115.45	300.156	847.383	1110.8	243.288	821.089	1113.18	370.818	877.724	972.71	200.752	884.077	979.871	460.799	822.329	934.395	327.368	803.53	696.986	66.2233	603.811	732.709	141.009	647.069	758.695	205.889	579.121	781.961	213.653	524.057	731.736	286.663	852.45	709.389	592.375	634.383	735.659	585.778	645.491	749.398	505.402	565.048	766.311	536.286	482.939	739.886	516.781
615	6.14	798.598	1115.4	300.163	847.393	1110.79	243.297	821.041	1113.16	370.83	877.734	972.707	200.743	884.058	979.848	460.794	822.307	934.384	327.379	803.541	696.978	66.2269	603.854	732.715	140.971	647.107	758.695	205.849	579.115	781.985	213.642	524.044	731.709	286.611	852.462	709.39	592.376	634.4	735.664	585.759	645.487	749.398	505.382	565.057	766.314	536.284	482.895	739.909	516.774
616	6.15	798.542	1115.43	300.199	847.342	1110.81	243.328	821.011	1113.17	370.863	877.728	972.729	200.773	884.041	979.839	460.809	822.278	934.385	327.394	803.527	696.982	66.2468	603.799	732.733	141.018	647.086	758.718	205.877	579.054	782.026	213.669	524.02	731.726	286.622	852.432	709.355	592.36	634.415	735.645	585.742	645.482	749.405	505.392	565.043	766.302	536.286	482.893	739.913	516.75
617	6.16	798.558	1115.43	300.246	847.307	1110.83	243.383	820.986	1113.16	370.902	877.704	972.719	200.783	884.04	979.85	460.835	822.25	934.391	327.403	803.541	696.997	66.2814	603.821	732.728	141.011	647.069	758.771	205.946	579.043	782.059	213.674	524.003	731.762	286.658	852.448	709.338	592.353	634.468	735.638	585.744	645.485	749.429	505.407	565.03	766.302	536.284	482.926	739.892	516.746
618	6.17	798.451	1115.47	300.286	847.283	1110.85	243.413	820.966	1113.17	370.926	877.693	972.7	200.783	884.069	979.86	460.846	822.206	934.406	327.405	803.584	697.032	66.2978	603.893	732.703	140.94	647.037	758.821	205.988	579.092	782.058	213.64	523.998	731.797	286.67	852.485	709.333	592.346	634.488	735.618	585.73	645.487	749.429	505.387	565.047	766.319	536.255	482.92	739.901	516.742
619	6.18	798.363	1115.5	300.325	847.273	1110.86	243.422	820.958	1113.2	370.944	877.685	972.716	200.791	884.06	979.866	460.848	822.239	934.384	327.391	803.61	697.059	66.3049	603.917	732.72	140.917	647.057	758.832	205.968	579.091	782.055	213.633	523.983	731.826	286.641	852.474	709.319	592.335	634.49	735.623	585.715	645.461	749.432	505.376	565.091	766.296	536.242	482.873	739.913	516.754
620	6.19	798.349	1115.49	300.36	847.251	1110.87	243.442	820.938	1113.19	370.981	877.68	972.714	200.807	884.066	979.86	460.861	822.257	934.36	327.405	803.633	697.059	66.3101	603.867	732.754	140.954	647.1	758.831	205.93	579.054	782.06	213.665	523.899	731.883	286.639	852.476	709.299	592.332	634.484	735.628	585.723	645.449	749.434	505.373	565.088	766.303	536.262	482.883	739.937	516.749
621	6.2	798.398	1115.45	300.401	847.253	1110.86	243.455	820.914	1113.14	371.025	877.72	972.685	200.821	884.063	979.83	460.868	822.26	934.33	327.447	803.613	697.015	66.3007	603.896	732.752	140.974	647.097	758.809	205.925	579.075	782.053	213.649	523.976	731.854	286.627	852.501	709.278	592.33	634.507	735.621	585.756	645.502	749.414	505.377	565.119	766.31	536.265	482.935	739.925	516.759
622	6.21	798.395	1115.4	300.405	847.279	1110.83	243.457	820.917	1113.09	371.035	877.723	972.659	200.812	884.094	979.785	460.846	822.279	934.291	327.409	803.58	696.975	66.2732	603.921	732.759	140.95	647.122	758.749	205.906	579.141	782.02	213.61	524.055	731.776	286.596	852.5	709.258	592.319	634.507	735.631	585.752	645.543	749.391	505.35	565.111	766.3	536.259	482.901	739.924	516.753
623	6.22	798.377	1115.37	300.422	847.238	1110.83	243.465	820.882	1113.06	371.031	877.721	972.627	200.784	884.071	979.747	460.829	822.294	934.237	327.379	803.536	696.939	66.2564	603.899	732.728	140.922	647.129	758.696	205.874	579.129	781.997	213.607	524.073	731.725	286.569	852.507	709.261	592.313	634.459	735.625	585.719	645.526	749.375	505.339	565.076	766.297	536.248	482.86	739.928	516.756
624	6.23	798.435	1115.34	300.45	847.174	1110.85	243.494	820.886	1113.04	371.072	877.68	972.623	200.792	884.023	979.737	460.833	822.362	934.198	327.4	803.527	696.917	66.2643	603.926	732.706	140.882	647.091	758.713	205.895	579.12	782.003	213.612	524.065	731.731	286.587	852.466	709.226	592.31	634.455	735.618	585.725	645.479	749.385	505.347	565.063	766.31	536.259	482.926	739.913	516.745
625	6.24	798.45	1115.33	300.502	847.164	1110.85	243.538	820.909	1113.05	371.122	877.669	972.625	200.812	883.986	979.729	460.847	822.425	934.158	327.441	803.533	696.92	66.2899	603.999	732.703	140.877	647.073	758.736	205.944	579.105	782.012	213.642	524.067	731.737	286.606	852.48	709.212	592.308	634.421	735.607	585.721	645.441	749.396	505.349	565.075	766.29	536.233	482.93	739.887	516.75
626	6.25	798.409	1115.34	300.508	847.208	1110.84	243.551	820.894	1113.06	371.134	877.657	972.623	200.817	883.979	979.722	460.847	822.398	934.154	327.43	803.554	696.926	66.3073	604.021	732.694	140.852	647.075	758.748	205.968	579.091	782.013	213.658	524.076	731.729	286.618	852.463	709.188	592.314	634.403	735.595	585.705	645.467	749.396	505.346	565.075	766.284	536.206	482.859	739.893	516.761
627	6.26	798.313	1115.37	300.499	847.209	1110.85	243.531	820.855	1113.07	371.139	877.613	972.604	200.824	883.96	979.725	460.849	822.349	934.158	327.414	803.563	696.911	66.3084	604.015	732.677	140.826	647.071	758.751	205.953	579.103	782.025	213.633	524.024	731.728	286.603	852.433	709.159	592.304	634.395	735.594	585.695	645.466	749.4	505.345	565.041	766.305	536.208	482.793	739.929	516.749
628	6.27	798.35	1115.37	300.503	847.179	1110.85	243.543	820.827	1113.06	371.146	877.596	972.582	200.826	883.927	979.742	460.848	822.345	934.143	327.413	803.557	696.897	66.3007	604.015	732.695	140.837	647.05	758.754	205.971	579.127	782.022	213.623	524.113	731.701	286.577	852.425	709.172	592.301	634.394	735.606	585.681	645.437	749.424	505.336	565.036	766.31	536.215	482.823	739.928	516.733
629	6.28	798.33	1115.42	300.512	847.174	1110.87	243.555	820.827	1113.08	371.142	877.609	972.595	200.834	883.932	979.752	460.849	822.334	934.147	327.43	803.568	696.903	66.298	603.99	732.741	140.845	647.097	758.768	205.961	579.115	782.042	213.619	524.109	731.766	286.592	852.442	709.174	592.288	634.416	735.623	585.688	645.429	749.431	505.345	565.059	766.315	536.223	482.856	739.935	516.732
630	6.29	798.313	1115.42	300.519	847.169	1110.89	243.543	820.816	1113.09	371.144	877.628	972.576	200.821	883.926	979.742	460.848	822.332	934.149	327.425	803.584	696.896	66.3076	603.977	732.741	140.844	647.105	758.774	205.951	579.11	782.049	213.623	524.062	731.796	286.587	852.438	709.165	592.287	634.399	735.639	585.687	645.399	749.43	505.33	565.083	766.332	536.224	482.84	739.947	516.736
631	6.3	798.273	1115.41	300.515	847.186	1110.89	243.52	820.817	1113.08	371.139	877.64	972.565	200.826	883.922	979.718	460.83	822.307	934.151	327.406	803.571	696.849	66.3194	603.999	732.729	140.8	647.074	758.758	205.945	579.118	782.041	213.633	524.031	731.792	286.565	852.433	709.134	592.276	634.386	735.607	585.661	645.402	749.412	505.314	565.079	766.321	536.213	482.824	739.932	516.705
632	6.31	798.319	1115.38	300.509	847.176	1110.89	243.519	820.849	1113.06	371.134	877.651	972.558	200.833	883.947	979.693	460.813	822.358	934.109	327.398	803.569	696.804	66.3227	604.04	732.725	140.803	647.075	758.726	205.923	579.135	782.026	213.604	524.046	731.782	286.545	852.47	709.127	592.283	634.473	735.585	585.669	645.423	749.383	505.312	565.082	766.29	536.213	482.829	739.912	516.73
633	6.32	798.379	1115.33	300.505	847.18	1110.87	243.535	820.871	1113.05	371.148	877.655	972.508	200.813	883.979	979.684	460.81	822.43	934.038	327.406	803.574	696.777	66.306	604.107	732.699	140.774	647.11	758.706	205.914	579.155	781.997	213.596	524.049	731.77	286.532	852.501	709.104	592.284	634.498	735.581	585.685	645.449	749.365	505.308	565.097	766.283	536.22	482.883	739.878	516.74
634	6.33	798.4	1115.32	300.501	847.195	1110.86	243.537	820.851	1113.05	371.145	877.67	972.483	200.796	883.971	979.672	460.809	822.457	934.004	327.376	803.548	696.757	66.3025	604.102	732.699	140.725	647.134	758.694	205.916	579.142	781.981	213.596	524.046	731.765	286.544	852.496	709.103	592.281	634.461	735.572	585.669	645.457	749.364	505.303	565.073	766.289	536.232	482.915	739.879	516.719
635	6.34	798.371	1115.33	300.496	847.176	1110.87	243.531	820.825	1113.05	371.139	877.695	972.485	200.786	883.963	979.671	460.8	822.415	933.997	327.348	803.536	696.753	66.2897	604.099	732.707	140.691	647.143	758.689	205.911	579.116	782.009	213.589	524.069	731.745	286.544	852.476	709.106	592.278	634.465	735.566	585.653	645.428	749.377	505.267	565.084	766.288	536.201	482.892	739.89	516.71
636	6.35	798.301	1115.39	300.523	847.176	1110.88	243.517	820.851	1113.06	371.144	877.704	972.474	200.775	883.977	979.687	460.799	822.423	934.003	327.348	803.547	696.74	66.2891	604.065	732.716	140.755	647.138	758.713	205.929	579.144	782.025	213.584	524.098	731.718	286.545	852.48	709.094	592.269	634.47	735.592	585.656	645.434	749.374	505.287	565.09	766.308	536.181	482.877	739.897	516.717
637	6.36	798.278	1115.43	300.581	847.176	1110.88	243.539	820.865	1113.08	371.181	877.671	972.487	200.807	883.972	979.701	460.806	822.438	934.013	327.392	803.561	696.758	66.3285	604.045	732.708	140.791	647.106	758.743	205.958	579.142	782.026	213.629	524.091	731.737	286.524	852.473	709.107	592.269	634.454	735.596	585.682	645.427	749.377	505.321	565.063	766.321	536.198	482.846	739.923	516.718
638	6.37	798.268	1115.46	300.598	847.173	1110.89	243.561	820.879	1113.1	371.213	877.668	972.486	200.823	883.961	979.692	460.811	822.394	934.046	327.39	803.581	696.777	66.3427	604.057	732.705	140.776	647.081	758.763	205.994	579.134	782.041	213.652	524.055	731.762	286.526	852.471	709.111	592.267	634.442	735.582	585.667	645.402	749.4	505.316	565.086	766.313	536.196	482.8	739.924	516.731
639	6.38	798.286	1115.44	300.566	847.167	1110.9	243.546	820.892	1113.11	371.211	877.706	972.482	200.819	883.978	979.678	460.796	822.398	934.039	327.37	803.581	696.777	66.3334	604.105	732.718	140.733	647.065	758.778	206.014	579.096	782.054	213.645	524.014	731.764	286.536	852.452	709.099	592.269	634.452	735.584	585.668	645.4	749.397	505.299	565.119	766.298	536.173	482.819	739.93	516.72
640	6.39	798.307	1115.45	300.533	847.156	1110.92	243.547	820.9	1113.11	371.194	877.707	972.467	200.815	883.98	979.664	460.784	822.449	933.998	327.357	803.555	696.731	66.3208	604.108	732.737	140.725	647.086	758.783	205.979	579.112	782.056	213.614	523.993	731.772	286.536	852.474	709.098	592.261	634.445	735.589	585.652	645.426	749.395	505.299	565.111	766.29	536.139	482.865	739.912	516.692
641	6.4	798.346	1115.43	300.534	847.148	1110.9	243.56	820.896	1113.1	371.194	877.649	972.427	200.806	883.975	979.663	460.788	822.435	933.988	327.366	803.516	696.692	66.3094	604.122	732.725	140.73	647.057	758.746	205.971	579.14	782.029	213.597	523.994	731.775	286.516	852.463	709.072	592.257	634.432	735.588	585.653	645.447	749.383	505.29	565.091	766.287	536.138	482.899	739.894	516.681
642	6.41	798.343	1115.43	300.533	847.169	1110.89	243.558	820.892	1113.09	371.183	877.646	972.424	200.787	883.965	979.646	460.778	822.451	933.954	327.354	803.512	696.683	66.3089	604.125	732.718	140.734	647.079	758.705	205.954	579.164	782.006	213.599	523.97	731.77	286.524	852.416	709.034	592.267	634.437	735.588	585.647	645.458	749.365	505.295	565.076	766.28	536.168	482.898	739.884	516.678
643	6.42	798.358	1115.41	300.508	847.219	1110.88	243.539	820.899	1113.07	371.162	877.697	972.419	200.76	883.96	979.618	460.766	822.488	933.898	327.325	803.527	696.658	66.3064	604.144	732.717	140.703	647.091	758.671	205.981	579.173	781.998	213.593	523.948	731.776	286.513	852.454	709.049	592.268	634.466	735.576	585.639	645.474	749.34	505.274	565.108	766.27	536.146	482.865	739.881	516.676
644	6.43	798.397	1115.38	300.475	847.259	1110.88	243.535	820.899	1113.06	371.157	877.699	972.383	200.748	883.938	979.593	460.754	822.504	933.865	327.323	803.513	696.626	66.2993	604.225	732.69	140.652	647.11	758.638	205.963	579.187	781.98	213.565	524.016	731.742	286.49	852.48	709.043	592.26	634.438	735.557	585.613	645.486	749.325	505.264	565.116	766.268	536.135	482.836	739.881	516.654
645	6.44	798.437	1115.38	300.485	847.23	1110.89	243.545	820.892	1113.08	371.169	877.638	972.371	200.777	883.923	979.596	460.755	822.481	933.863	327.327	803.508	696.632	66.3014	604.23	732.705	140.653	647.121	758.665	205.938	579.179	781.977	213.568	524.068	731.733	286.503	852.447	709.036	592.266	634.424	735.556	585.627	645.475	749.341	505.262	565.083	766.293	536.161	482.81	739.909	516.685
646	6.45	798.4	1115.42	300.509	847.214	1110.92	243.558	820.872	1113.11	371.152	877.648	972.388	200.786	883.896	979.602	460.76	822.445	933.897	327.324	803.52	696.657	66.2912	604.096	732.752	140.726	647.125	758.702	205.935	579.138	782.007	213.586	524.016	731.783	286.524	852.426	709.033	592.255	634.439	735.582	585.641	645.398	749.38	505.265	565.071	766.309	536.184	482.75	739.95	516.694
647	6.46	798.405	1115.48	300.498	847.215	1110.94	243.56	820.872	1113.14	371.16	877.655	972.408	200.784	883.896	979.624	460.755	822.42	933.926	327.322	803.518	696.676	66.3052	604.094	732.755	140.741	647.091	758.731	205.957	579.118	782.051	213.59	523.961	731.834	286.533	852.444	709.041	592.243	634.43	735.609	585.626	645.365	749.404	505.264	565.045	766.326	536.183	482.781	739.923	516.697
648	6.47	798.339	1115.5	300.52	847.225	1110.96	243.558	820.879	1113.16	371.185	877.675	972.422	200.784	883.887	979.635	460.757	822.421	933.924	327.326	803.544	696.705	66.3302	604.204	732.726	140.69	647.082	758.772	205.994	579.127	782.046	213.588	523.996	731.823	286.518	852.454	709.051	592.253	634.404	735.618	585.621	645.342	749.428	505.266	565.055	766.317	536.152	482.792	739.943	516.693
649	6.48	798.312	1115.5	300.555	847.242	1110.96	243.555	820.88	1113.16	371.213	877.658	972.398	200.792	883.879	979.62	460.767	822.466	933.892	327.349	803.556	696.711	66.3457	604.259	732.702	140.64	647.1	758.77	205.994	579.137	782.047	213.6	524.058	731.786	286.535	852.433	709.037	592.266	634.42	735.597	585.613	645.314	749.431	505.295	565.058	766.298	536.162	482.791	739.937	516.702
650	6.49	798.324	1115.5	300.575	847.247	1110.94	243.567	820.866	1113.15	371.237	877.653	972.397	200.809	883.892	979.606	460.759	822.524	933.841	327.376	803.536	696.696	66.3373	604.199	732.702	140.642	647.096	758.762	206.024	579.133	782.042	213.614	524.012	731.786	286.539	852.435	709.027	592.265	634.427	735.566	585.614	645.35	749.41	505.319	565.073	766.291	536.165	482.782	739.91	516.691
651	6.5	798.326	1115.47	300.588	847.25	1110.93	243.589	820.877	1113.11	371.25	877.661	972.378	200.807	883.907	979.581	460.755	822.553	933.799	327.364	803.523	696.67	66.3329	604.153	732.709	140.681	647.084	758.724	206.032	579.123	782.025	213.62	524.004	731.767	286.559	852.444	709.022	592.273	634.427	735.557	585.615	645.387	749.382	505.304	565.096	766.295	536.163	482.841	739.869	516.697
652	6.51	798.357	1115.42	300.592	847.228	1110.92	243.599	820.866	1113.07	371.24	877.661	972.329	200.79	883.91	979.531	460.742	822.601	933.769	327.336	803.523	696.611	66.3196	604.119	732.718	140.713	647.114	758.663	205.978	579.14	781.99	213.606	524.058	731.72	286.527	852.436	709.012	592.284	634.434	735.573	585.613	645.399	749.341	505.291	565.084	766.297	536.165	482.889	739.855	516.703
653	6.52	798.368	1115.4	300.583	847.212	1110.91	243.599	820.878	1113.04	371.217	877.683	972.304	200.764	883.929	979.514	460.722	822.655	933.714	327.334	803.508	696.551	66.2822	604.114	732.718	140.709	647.134	758.622	205.952	579.156	781.96	213.568	524.102	731.695	286.507	852.448	708.999	592.293	634.46	735.578	585.597	645.458	749.301	505.268	565.092	766.284	536.15	482.882	739.876	516.683
654	6.53	798.378	1115.4	300.58	847.212	1110.91	243.583	820.893	1113.05	371.198	877.704	972.285	200.731	883.949	979.513	460.708	822.639	933.703	327.321	803.453	696.513	66.2577	604.138	732.719	140.692	647.135	758.597	205.926	579.181	781.968	213.555	524.144	731.682	286.493	852.466	709.007	592.273	634.443	735.55	585.596	645.478	749.299	505.236	565.123	766.277	536.121	482.914	739.872	516.648
655	6.54	798.363	1115.46	300.589	847.218	1110.94	243.57	820.905	1113.08	371.209	877.683	972.303	200.746	883.934	979.523	460.703	822.56	933.743	327.299	803.474	696.53	66.2746	604.216	732.714	140.605	647.119	758.645	205.945	579.153	782.011	213.568	524.117	731.72	286.464	852.47	709.009	592.268	634.428	735.534	585.596	645.447	749.334	505.229	565.158	766.277	536.107	482.9	739.913	516.63
656	6.55	798.324	1115.48	300.613	847.189	1110.96	243.602	820.898	1113.13	371.243	877.654	972.341	200.784	883.934	979.552	460.725	822.48	933.808	327.307	803.516	696.569	66.3163	604.252	732.73	140.59	647.106	758.701	205.966	579.133	782.056	213.58	523.978	731.821	286.479	852.475	709.017	592.274	634.445	735.551	585.616	645.426	749.381	505.258	565.149	766.283	536.13	482.874	739.929	516.654
657	6.56	798.338	1115.54	300.641	847.18	1110.98	243.638	820.904	1113.17	371.282	877.649	972.363	200.805	883.914	979.59	460.747	822.477	933.841	327.343	803.547	696.619	66.3468	604.244	732.732	140.61	647.099	758.765	205.986	579.169	782.062	213.596	523.969	731.844	286.5	852.46	709.015	592.29	634.473	735.583	585.621	645.44	749.409	505.282	565.107	766.294	536.141	482.907	739.885	516.672
658	6.57	798.326	1115.58	300.651	847.196	1110.98	243.642	820.928	1113.18	371.294	877.674	972.376	200.816	883.88	979.598	460.744	822.493	933.834	327.345	803.534	696.625	66.344	604.254	732.709	140.6	647.104	758.781	205.99	579.201	782.062	213.6	523.961	731.831	286.512	852.437	709.001	592.279	634.487	735.583	585.624	645.417	749.412	505.276	565.108	766.28	536.122	482.864	739.897	516.666
659	6.58	798.374	1115.56	300.663	847.192	1110.98	243.644	820.923	1113.17	371.303	877.662	972.357	200.809	883.883	979.588	460.729	822.512	933.796	327.334	803.529	696.609	66.3345	604.229	732.708	140.611	647.105	758.749	205.979	579.18	782.052	213.599	523.962	731.834	286.498	852.431	708.997	592.28	634.462	735.581	585.621	645.394	749.398	505.26	565.101	766.274	536.117	482.828	739.894	516.636
660	6.59	798.423	1115.51	300.659	847.228	1110.96	243.647	820.923	1113.14	371.302	877.628	972.319	200.794	883.889	979.573	460.725	822.585	933.731	327.341	803.544	696.585	66.3346	604.225	732.701	140.615	647.144	758.722	205.961	579.163	782.027	213.601	523.99	731.781	286.48	852.424	709.012	592.289	634.406	735.569	585.607	645.394	749.391	505.259	565.079	766.284	536.109	482.806	739.88	516.639
661	6.6	798.373	1115.49	300.688	847.263	1110.94	243.657	820.943	1113.11	371.325	877.625	972.286	200.783	883.875	979.54	460.72	822.611	933.693	327.346	803.546	696.563	66.3248	604.233	732.712	140.634	647.175	758.674	205.938	579.181	781.987	213.593	524.075	731.711	286.487	852.429	708.992	592.291	634.432	735.577	585.625	645.429	749.365	505.272	565.091	766.287	536.11	482.845	739.881	516.665
662	6.61	798.414	1115.47	300.686	847.233	1110.95	243.669	820.946	1113.09	371.327	877.624	972.237	200.782	883.879	979.517	460.722	822.621	933.669	327.337	803.507	696.515	66.3089	604.229	732.732	140.633	647.155	758.641	205.928	579.179	781.972	213.586	524.073	731.72	286.496	852.398	708.958	592.286	634.439	735.583	585.633	645.415	749.345	505.263	565.092	766.307	536.121	482.878	739.895	516.661
663	6.62	798.461	1115.43	300.663	847.235	1110.95	243.669	820.919	1113.07	371.319	877.604	972.215	200.776	883.899	979.497	460.713	822.7	933.617	327.328	803.487	696.469	66.2986	604.234	732.737	140.606	647.158	758.617	205.918	579.171	781.963	213.563	524.061	731.709	286.475	852.422	708.967	592.287	634.417	735.556	585.604	645.396	749.338	505.246	565.083	766.294	536.127	482.866	739.89	516.677
664	6.63	798.382	1115.47	300.684	847.263	1110.96	243.662	820.927	1113.06	371.332	877.604	972.249	200.787	883.897	979.488	460.703	822.748	933.605	327.32	803.489	696.476	66.3091	604.202	732.724	140.631	647.178	758.618	205.92	579.167	781.964	213.55	524.066	731.71	286.461	852.431	708.965	592.281	634.448	735.552	585.586	645.413	749.353	505.251	565.102	766.29	536.121	482.878	739.869	516.654
665	6.64	798.332	1115.51	300.732	847.281	1110.98	243.696	820.935	1113.08	371.371	877.627	972.284	200.819	883.87	979.487	460.713	822.681	933.629	327.332	803.495	696.502	66.3294	604.217	732.734	140.651	647.13	758.675	205.983	579.184	781.995	213.582	524.042	731.75	286.492	852.427	708.951	592.273	634.417	735.554	585.593	645.412	749.364	505.262	565.088	766.288	536.128	482.871	739.887	516.642
666	6.65	798.338	1115.53	300.776	847.291	1111.01	243.734	820.947	1113.11	371.416	877.638	972.286	200.828	883.872	979.509	460.748	822.647	933.651	327.354	803.542	696.542	66.342	604.217	732.748	140.672	647.143	758.724	205.994	579.179	782.042	213.594	524.012	731.774	286.522	852.414	708.94	592.267	634.401	735.543	585.636	645.388	749.37	505.27	565.079	766.294	536.139	482.828	739.89	516.672
667	6.66	798.373	1115.56	300.805	847.253	1111.03	243.768	820.941	1113.14	371.446	877.643	972.298	200.833	883.878	979.526	460.765	822.63	933.677	327.361	803.587	696.589	66.3567	604.227	732.739	140.634	647.138	758.74	206	579.14	782.057	213.62	523.961	731.805	286.534	852.427	708.918	592.238	634.428	735.563	585.658	645.399	749.387	505.273	565.102	766.285	536.152	482.819	739.867	516.696
668	6.67	798.387	1115.56	300.808	847.195	1111.05	243.799	820.918	1113.15	371.466	877.661	972.329	200.851	883.875	979.526	460.764	822.603	933.689	327.36	803.582	696.602	66.3576	604.212	732.735	140.646	647.122	758.754	205.993	579.133	782.058	213.618	523.917	731.842	286.526	852.436	708.912	592.21	634.484	735.585	585.65	645.396	749.409	505.27	565.109	766.292	536.157	482.817	739.898	516.689
669	6.68	798.39	1115.54	300.843	847.19	1111.04	243.815	820.895	1113.15	371.492	877.67	972.32	200.844	883.894	979.509	460.754	822.62	933.664	327.367	803.554	696.574	66.3438	604.185	732.742	140.665	647.124	758.75	205.982	579.176	782.055	213.597	523.871	731.867	286.522	852.436	708.901	592.203	634.467	735.576	585.639	645.363	749.406	505.258	565.096	766.316	536.17	482.837	739.906	516.702
670	6.69	798.452	1115.53	300.866	847.196	1111.04	243.82	820.906	1113.12	371.501	877.668	972.296	200.831	883.898	979.488	460.755	822.656	933.647	327.348	803.548	696.542	66.3316	604.206	732.776	140.669	647.126	758.714	205.981	579.194	782.027	213.589	523.936	731.833	286.484	852.439	708.885	592.207	634.47	735.562	585.629	645.365	749.382	505.243	565.087	766.31	536.149	482.875	739.905	516.679
671	6.7	798.479	1115.5	300.888	847.225	1111.03	243.829	820.91	1113.08	371.518	877.658	972.263	200.824	883.914	979.475	460.744	822.718	933.597	327.345	803.546	696.513	66.3149	604.167	732.771	140.672	647.162	758.666	205.945	579.202	781.996	213.59	524.043	731.766	286.456	852.462	708.873	592.176	634.488	735.56	585.61	645.382	749.365	505.234	565.097	766.3	536.153	482.874	739.88	516.676
672	6.71	798.445	1115.45	300.938	847.215	1111.03	243.863	820.903	1113.04	371.536	877.661	972.241	200.827	883.918	979.461	460.74	822.767	933.519	327.356	803.519	696.487	66.314	604.125	732.755	140.689	647.173	758.632	205.944	579.2	781.978	213.611	524.078	731.727	286.482	852.429	708.835	592.164	634.469	735.56	585.614	645.402	749.354	505.246	565.107	766.292	536.172	482.898	739.872	516.676
673	6.72	798.431	1115.44	300.992	847.216	1111.02	243.894	820.882	1113.02	371.569	877.662	972.241	200.842	883.92	979.456	460.755	822.848	933.48	327.358	803.525	696.5	66.3266	604.147	732.763	140.714	647.178	758.626	205.976	579.206	781.977	213.618	524.096	731.699	286.509	852.431	708.816	592.16	634.461	735.537	585.629	645.467	749.324	505.248	565.116	766.296	536.188	482.916	739.873	516.688
674	6.73	798.38	1115.48	301.045	847.205	1111.03	243.943	820.871	1113.04	371.627	877.654	972.263	200.844	883.892	979.464	460.772	822.822	933.48	327.383	803.533	696.52	66.3421	604.18	732.747	140.713	647.152	758.65	205.998	579.199	781.976	213.631	524.067	731.719	286.518	852.475	708.82	592.155	634.46	735.518	585.619	645.489	749.306	505.26	565.135	766.274	536.179	482.915	739.859	516.708
675	6.74	798.291	1115.52	301.081	847.119	1111.07	243.975	820.813	1113.07	371.675	877.647	972.277	200.859	883.834	979.473	460.792	822.725	933.517	327.391	803.547	696.539	66.3638	604.115	732.722	140.714	647.121	758.695	206.025	579.168	782.005	213.642	523.989	731.78	286.519	852.498	708.829	592.157	634.442	735.507	585.619	645.474	749.331	505.284	565.126	766.266	536.174	482.903	739.848	516.709
676	6.75	798.198	1115.54	301.09	847.053	1111.09	243.987	820.764	1113.08	371.695	877.65	972.267	200.873	883.804	979.487	460.818	822.731	933.495	327.433	803.565	696.539	66.3763	604.109	732.715	140.723	647.122	758.703	206.018	579.145	782.031	213.655	523.991	731.786	286.518	852.474	708.813	592.144	634.456	735.52	585.636	645.43	749.362	505.309	565.112	766.286	536.185	482.891	739.845	516.685
677	6.76	798.238	1115.5	301.103	847.082	1111.05	243.973	820.772	1113.07	371.694	877.651	972.247	200.887	883.808	979.482	460.831	822.751	933.475	327.446	803.553	696.507	66.3614	604.157	732.745	140.727	647.147	758.693	205.996	579.171	782.029	213.649	523.998	731.771	286.528	852.476	708.823	592.156	634.492	735.542	585.664	645.451	749.368	505.293	565.09	766.3	536.18	482.874	739.876	516.698
678	6.77	798.275	1115.47	301.104	847.092	1111.01	243.989	820.764	1113.04	371.701	877.633	972.232	200.895	883.823	979.471	460.837	822.775	933.434	327.456	803.516	696.456	66.3642	604.156	732.772	140.744	647.169	758.681	205.982	579.189	782.016	213.646	524.054	731.745	286.529	852.49	708.827	592.171	634.464	735.541	585.681	645.46	749.365	505.286	565.077	766.307	536.208	482.906	739.901	516.733
679	6.78	798.234	1115.43	301.129	847.06	1111.01	243.996	820.716	1113.01	371.706	877.649	972.221	200.906	883.786	979.44	460.833	822.784	933.409	327.464	803.509	696.444	66.3674	604.111	732.773	140.765	647.171	758.671	205.976	579.166	781.998	213.652	524.03	731.762	286.54	852.46	708.813	592.17	634.473	735.536	585.686	645.431	749.375	505.283	565.099	766.299	536.22	482.889	739.919	516.737
680	6.79	798.199	1115.4	301.137	847.041	1111	243.995	820.673	1112.99	371.718	877.652	972.209	200.912	883.768	979.426	460.838	822.789	933.403	327.472	803.536	696.454	66.3685	604.062	732.794	140.798	647.182	758.65	205.969	579.177	782.004	213.651	523.99	731.762	286.554	852.466	708.827	592.195	634.474	735.537	585.694	645.429	749.383	505.291	565.089	766.302	536.218	482.87	739.925	516.746
681	6.8	798.214	1115.36	301.158	847.011	1111	244.022	820.654	1112.97	371.74	877.636	972.195	200.916	883.762	979.423	460.849	822.823	933.382	327.497	803.553	696.462	66.3806	604.068	732.777	140.81	647.17	758.669	206.001	579.222	782.017	213.647	524.018	731.749	286.585	852.461	708.82	592.229	634.45	735.541	585.67	645.412	749.389	505.306	565.061	766.308	536.218	482.827	739.908	516.758
682	6.81	798.161	1115.36	301.208	846.966	1111	244.064	820.588	1112.94	371.762	877.641	972.211	200.918	883.755	979.419	460.875	822.859	933.357	327.516	803.537	696.449	66.387	604.071	732.751	140.838	647.166	758.696	206.025	579.194	782.019	213.662	523.986	731.765	286.625	852.412	708.784	592.258	634.452	735.526	585.702	645.38	749.385	505.334	565.044	766.302	536.245	482.805	739.907	516.772
683	6.82	798.092	1115.36	301.229	846.946	1110.98	244.068	820.518	1112.92	371.772	877.631	972.224	200.918	883.727	979.402	460.878	822.844	933.333	327.526	803.556	696.453	66.3969	604.047	732.745	140.849	647.152	758.677	206.02	579.166	782.01	213.671	524.014	731.76	286.615	852.37	708.748	592.257	634.427	735.523	585.711	645.376	749.382	505.331	565.046	766.299	536.262	482.777	739.921	516.785
684	6.83	798.138	1115.32	301.217	846.943	1110.98	244.069	820.497	1112.89	371.775	877.637	972.218	200.925	883.73	979.396	460.865	822.856	933.31	327.501	803.569	696.454	66.3886	603.995	732.771	140.86	647.141	758.649	206.007	579.177	781.995	213.669	524.015	731.755	286.601	852.352	708.763	592.241	634.388	735.528	585.729	645.432	749.364	505.317	565.005	766.297	536.278	482.795	739.901	516.784
685	6.84	798.096	1115.32	301.228	846.928	1110.97	244.063	820.486	1112.89	371.784	877.659	972.216	200.914	883.765	979.386	460.859	822.862	933.316	327.481	803.566	696.445	66.3804	604.048	732.786	140.844	647.131	758.684	206.023	579.176	782.001	213.683	524.023	731.778	286.591	852.367	708.763	592.233	634.421	735.533	585.738	645.476	749.352	505.325	565.014	766.283	536.281	482.86	739.884	516.763
686	6.85	798.003	1115.34	301.254	846.889	1111.01	244.077	820.441	1112.89	371.8	877.656	972.195	200.917	883.751	979.385	460.867	822.883	933.319	327.485	803.558	696.447	66.3896	604.026	732.817	140.885	647.143	758.7	206.028	579.176	782.02	213.693	524.069	731.765	286.594	852.407	708.766	592.241	634.408	735.541	585.737	645.472	749.351	505.344	565.069	766.301	536.273	482.891	739.888	516.78
687	6.86	798.021	1115.3	301.257	846.851	1111.02	244.093	820.413	1112.88	371.804	877.644	972.189	200.927	883.723	979.378	460.889	822.876	933.309	327.477	803.552	696.439	66.3934	603.98	732.828	140.915	647.176	758.676	205.998	579.16	782.028	213.683	524.053	731.774	286.589	852.42	708.77	592.242	634.407	735.539	585.732	645.461	749.345	505.334	565.084	766.298	536.266	482.875	739.896	516.772
688	6.87	798.071	1115.28	301.261	846.83	1111.01	244.112	820.431	1112.87	371.816	877.618	972.191	200.933	883.732	979.372	460.895	822.872	933.296	327.499	803.567	696.433	66.3914	603.97	732.805	140.945	647.162	758.677	205.978	579.182	782.021	213.69	524.037	731.767	286.605	852.418	708.752	592.237	634.446	735.545	585.735	645.488	749.35	505.327	565.117	766.304	536.275	482.882	739.894	516.783
689	6.88	798.055	1115.3	301.305	846.846	1110.99	244.142	820.432	1112.87	371.843	877.624	972.194	200.93	883.731	979.377	460.912	822.893	933.28	327.532	803.562	696.427	66.3962	604.045	732.792	140.92	647.154	758.69	205.993	579.168	782.009	213.704	524.048	731.759	286.637	852.443	708.762	592.229	634.452	735.553	585.759	645.471	749.36	505.348	565.114	766.324	536.268	482.913	739.902	516.791
690	6.89	797.963	1115.32	301.332	846.832	1110.98	244.156	820.388	1112.86	371.845	877.618	972.186	200.93	883.68	979.386	460.924	822.866	933.303	327.549	803.522	696.415	66.3967	603.987	732.784	140.904	647.118	758.706	206.024	579.15	782.015	213.711	524.052	731.755	286.614	852.421	708.741	592.214	634.439	735.528	585.764	645.455	749.355	505.369	565.103	766.321	536.259	482.918	739.885	516.799
691	6.9	797.969	1115.3	301.317	846.795	1110.99	244.139	820.368	1112.86	371.842	877.625	972.172	200.939	883.671	979.384	460.907	822.905	933.275	327.518	803.505	696.425	66.3847	603.967	732.771	140.89	647.107	758.692	205.981	579.144	782.019	213.695	524.045	731.745	286.58	852.377	708.715	592.212	634.413	735.517	585.77	645.453	749.348	505.346	565.085	766.306	536.246	482.896	739.886	516.797
692	6.91	798.002	1115.3	301.323	846.805	1110.98	244.143	820.369	1112.86	371.851	877.619	972.153	200.934	883.672	979.369	460.901	822.951	933.248	327.528	803.517	696.425	66.3734	603.971	732.772	140.9	647.129	758.674	205.979	579.157	782.001	213.7	524.078	731.72	286.573	852.384	708.722	592.205	634.391	735.537	585.771	645.464	749.351	505.343	565.107	766.316	536.255	482.845	739.91	516.787
693	6.92	798.005	1115.31	301.358	846.81	1110.97	244.171	820.364	1112.86	371.87	877.617	972.156	200.945	883.695	979.36	460.906	822.974	933.245	327.567	803.538	696.431	66.3787	603.948	732.784	140.934	647.142	758.655	205.998	579.14	782.007	213.72	524.09	731.737	286.614	852.401	708.739	592.19	634.427	735.55	585.789	645.479	749.353	505.365	565.119	766.321	536.302	482.852	739.933	516.804
694	6.93	798.044	1115.29	301.365	846.832	1110.98	244.174	820.345	1112.85	371.882	877.62	972.161	200.963	883.706	979.35	460.917	822.958	933.252	327.563	803.554	696.427	66.3851	603.982	732.802	140.937	647.158	758.658	205.999	579.146	782.005	213.737	524.147	731.719	286.611	852.407	708.736	592.203	634.415	735.542	585.789	645.477	749.36	505.39	565.098	766.31	536.326	482.837	739.943	516.816
695	6.94	798.06	1115.26	301.35	846.862	1110.98	244.143	820.365	1112.84	371.877	877.619	972.165	200.965	883.726	979.343	460.899	823.017	933.232	327.531	803.535	696.403	66.3725	604.038	732.816	140.939	647.191	758.648	205.962	579.168	781.996	213.718	524.171	731.696	286.585	852.415	708.733	592.205	634.43	735.54	585.781	645.488	749.363	505.37	565.077	766.309	536.326	482.847	739.936	516.813
696	6.95	798.047	1115.27	301.337	846.841	1110.98	244.137	820.383	1112.85	371.877	877.634	972.17	200.958	883.732	979.349	460.888	823.022	933.233	327.513	803.515	696.393	66.368	604.048	732.786	140.929	647.184	758.664	205.957	579.174	782.003	213.71	524.153	731.693	286.591	852.431	708.705	592.186	634.466	735.562	585.768	645.521	749.363	505.353	565.086	766.322	536.321	482.902	739.926	516.796
697	6.96	798.015	1115.29	301.363	846.785	1111	244.165	820.384	1112.86	371.903	877.647	972.179	200.965	883.696	979.353	460.903	822.966	933.255	327.539	803.537	696.414	66.3915	604.025	732.792	140.939	647.16	758.691	205.978	579.153	782.026	213.723	524.134	731.722	286.599	852.42	708.698	592.182	634.466	735.557	585.774	645.518	749.371	505.372	565.065	766.337	536.336	482.862	739.926	516.817
698	6.97	797.992	1115.3	301.399	846.708	1111.02	244.231	820.352	1112.87	371.938	877.628	972.172	200.974	883.687	979.357	460.921	822.951	933.269	327.561	803.569	696.438	66.4106	604.058	732.788	140.933	647.157	758.723	206.034	579.16	782.042	213.743	524.113	731.734	286.615	852.387	708.688	592.193	634.381	735.539	585.789	645.505	749.381	505.404	565.043	766.342	536.353	482.835	739.944	516.856
699	6.98	797.999	1115.3	301.456	846.589	1111.1	244.302	820.316	1112.88	371.966	877.6	972.151	200.981	883.676	979.36	460.948	822.983	933.287	327.589	803.568	696.448	66.4246	603.951	732.76	141.043	647.197	758.778	206.056	579.154	782.041	213.763	524.029	731.787	286.713	852.363	708.699	592.218	634.34	735.576	585.777	645.491	749.395	505.415	565.019	766.327	536.374	482.747	739.982	516.895
[truncated: 3 more columns]

## Sheet: Trial01
PathFileType	4	(X/Y/Z)	Trial01.trc
DataRate	CameraRate	NumFrames	NumMarkers	Units	OrigDataRate	OrigDataStartFrame	OrigNumFrames
100	100	1010	16	mm	100	1	1010
Frame#	Time	nasion			r zyg pr			l zyg pr			r should			l should			sternum			r elbow			r ulna			r radius			r hand			r finger			l elbow			l ulna			l radius			l hand			l finger
		X1	Y1	Z1	X2	Y2	Z2	X3	Y3	Z3	X4	Y4	Z4	X5	Y5	Z5	X6	Y6	Z6	X7	Y7	Z7	X8	Y8	Z8	X9	Y9	Z9	X10	Y10	Z10	X11	Y11	Z11	X12	Y12	Z12	X13	Y13	Z13	X14	Y14	Z14	X15	Y15	Z15	X16	Y16	Z16
1	0	799.379	1110.19	337.395	851.285	1111.06	285.376	814.864	1106.59	410.502	904.461	968.173	241.487	883.087	982.267	492.451	838.594	927.855	358.123	879.027	689.721	93.8293	671.524	731.363	141.256	707.847	760.831	207.433	637.047	783.566	209.396	584.072	730.137	282.233	805.332	719.713	616.896	590.749	734.139	582.118	608.175	765.178	506.195	525.413	766.699	533.863	447.981	739.126	513.35
2	0.01	799.381	1110.19	337.383	851.268	1111.1	285.352	814.833	1106.6	410.476	904.512	968.18	241.402	883.048	982.268	492.421	838.568	927.861	358.099	879.01	689.677	93.794	671.542	731.39	141.212	707.81	760.813	207.415	637.089	783.514	209.372	584.138	730.103	282.124	805.284	719.7	616.868	591.173	733.677	581.713	608.179	765.173	506.167	525.505	766.725	533.853	447.456	739.341	513.688
3	0.02	799.318	1110.26	337.402	851.23	1111.1	285.352	814.808	1106.63	410.481	904.49	968.183	241.374	883.016	982.289	492.408	838.566	927.874	358.065	879.015	689.677	93.7796	671.496	731.408	141.2	707.799	760.845	207.408	637.094	783.508	209.365	584.179	730.122	282.078	805.232	719.71	616.858	591.093	733.797	581.796	608.16	765.206	506.165	525.505	766.769	533.858	447.303	739.428	513.771
4	0.03	799.223	1110.33	337.462	851.167	1111.13	285.385	814.788	1106.65	410.527	904.476	968.162	241.408	883	982.311	492.427	838.468	927.89	358.086	878.995	689.697	93.7867	671.507	731.407	141.208	707.772	760.887	207.427	637.05	783.547	209.402	584.175	730.149	282.086	805.22	719.713	616.885	591.416	733.353	581.454	608.126	765.229	506.192	525.53	766.798	533.881	447.435	739.386	513.707
5	0.04	799.141	1110.38	337.529	851.075	1111.16	285.41	814.787	1106.67	410.58	904.474	968.152	241.404	882.995	982.327	492.434	838.441	927.907	358.12	878.981	689.72	93.8173	671.519	731.406	141.195	707.719	760.902	207.468	637.015	783.58	209.417	584.09	730.211	282.113	805.235	719.72	616.906	591.462	733.221	581.387	608.123	765.241	506.201	525.521	766.801	533.882	447.647	739.273	513.566
6	0.05	799.167	1110.35	337.587	851.042	1111.15	285.427	814.802	1106.66	410.608	904.464	968.129	241.397	882.986	982.315	492.429	838.442	927.892	358.129	878.996	689.707	93.8285	671.503	731.402	141.176	707.752	760.89	207.46	637.035	783.576	209.412	584.089	730.232	282.13	805.21	719.702	616.907	591.472	733.189	581.357	608.103	765.216	506.202	525.533	766.761	533.872	447.321	739.384	513.746
7	0.06	799.249	1110.26	337.662	851.041	1111.1	285.451	814.861	1106.61	410.677	904.477	968.087	241.437	883.005	982.297	492.447	838.495	927.822	358.145	879.012	689.674	93.8194	671.492	731.411	141.202	707.806	760.874	207.448	637.081	783.543	209.426	584.157	730.166	282.14	805.2	719.681	616.936	591.453	733.141	581.348	608.083	765.156	506.202	525.529	766.716	533.884	447.238	739.411	513.812
8	0.07	799.281	1110.18	337.746	850.987	1111.05	285.499	814.931	1106.56	410.747	904.503	968.079	241.492	883.028	982.288	492.472	838.55	927.762	358.19	879.003	689.639	93.798	671.476	731.407	141.252	707.804	760.854	207.451	637.085	783.512	209.426	584.255	730.099	282.149	805.204	719.665	616.975	591.473	733.108	581.381	608.113	765.079	506.199	525.524	766.671	533.89	447.257	739.38	513.824
9	0.08	799.289	1110.08	337.792	850.915	1111.05	285.528	814.957	1106.53	410.775	904.486	968.06	241.499	883.053	982.275	492.487	838.528	927.748	358.217	879.011	689.619	93.7956	671.513	731.374	141.255	707.775	760.822	207.475	637.041	783.492	209.442	584.25	730.066	282.158	805.234	719.669	617.005	591.504	733.096	581.389	608.135	765.021	506.194	525.542	766.627	533.861	447.306	739.35	513.772
10	0.09	799.265	1110.05	337.819	850.89	1111.02	285.532	814.977	1106.5	410.79	904.461	968.048	241.481	883.049	982.264	492.481	838.563	927.721	358.205	879.024	689.616	93.7891	671.521	731.381	141.231	707.765	760.787	207.472	637.065	783.448	209.444	584.219	730.063	282.164	805.269	719.688	617.015	591.515	733.116	581.386	608.157	764.977	506.19	525.575	766.591	533.827	447.327	739.348	513.743
11	0.1	799.278	1110.06	337.869	850.916	1111.02	285.521	815.03	1106.48	410.823	904.491	968.042	241.478	883.068	982.272	492.477	838.686	927.723	358.177	879.039	689.592	93.7987	671.522	731.376	141.219	707.775	760.787	207.468	637.144	783.447	209.41	584.219	730.071	282.144	805.314	719.706	617.025	591.542	733.087	581.438	608.2	764.932	506.174	525.603	766.564	533.816	447.364	739.357	513.707
12	0.11	799.255	1110.07	337.908	850.886	1111.05	285.53	815.073	1106.49	410.855	904.558	968.072	241.46	883.105	982.289	492.478	838.688	927.759	358.179	879.099	689.634	93.8359	671.511	731.394	141.213	707.785	760.826	207.478	637.182	783.496	209.417	584.233	730.107	282.127	805.355	719.731	617.043	591.562	733.081	581.437	608.18	764.925	506.17	525.621	766.562	533.8	447.381	739.383	513.678
13	0.12	799.084	1110.17	337.95	850.732	1111.13	285.562	815.024	1106.52	410.878	904.549	968.097	241.429	883.082	982.323	492.469	838.568	927.844	358.199	879.101	689.689	93.8928	671.482	731.406	141.203	707.698	760.913	207.523	637.061	783.568	209.439	584.11	730.233	282.136	805.314	719.736	617.008	591.544	733.067	581.442	608.141	764.934	506.173	525.617	766.549	533.772	447.554	739.365	513.528
14	0.13	798.978	1110.27	337.993	850.625	1111.2	285.63	814.971	1106.55	410.905	904.523	968.112	241.411	883.044	982.348	492.452	838.429	927.919	358.193	879.108	689.733	93.9231	671.454	731.433	141.193	707.652	760.998	207.543	636.988	783.64	209.461	584.07	730.322	282.143	805.27	719.754	616.957	591.516	733.068	581.453	608.108	764.959	506.174	525.595	766.515	533.767	447.751	739.35	513.376
15	0.14	799.008	1110.3	338.037	850.653	1111.2	285.662	814.974	1106.54	410.935	904.529	968.119	241.41	883.059	982.36	492.448	838.394	927.924	358.177	879.097	689.741	93.9133	671.508	731.421	141.194	707.691	760.999	207.537	637	783.668	209.465	584.108	730.301	282.128	805.279	719.764	616.947	591.512	733.073	581.452	608.106	764.952	506.183	525.631	766.498	533.766	447.53	739.443	513.521
16	0.15	799.13	1110.2	338.059	850.703	1111.14	285.639	815.025	1106.51	410.958	904.55	968.113	241.418	883.075	982.339	492.429	838.486	927.879	358.163	879.079	689.7	93.871	671.526	731.406	141.181	707.76	760.924	207.496	637.056	783.607	209.437	584.098	730.255	282.124	805.317	719.773	616.965	591.525	733.083	581.461	608.128	764.919	506.167	525.619	766.478	533.729	447.497	739.456	513.545
17	0.16	799.217	1110.11	338.082	850.739	1111.08	285.608	815.051	1106.47	410.971	904.547	968.087	241.438	883.054	982.314	492.41	838.609	927.792	358.146	879.018	689.624	93.8131	671.524	731.408	141.201	707.759	760.82	207.477	637.078	783.506	209.416	584.113	730.176	282.116	805.301	719.774	616.964	591.52	733.1	581.438	608.135	764.89	506.128	525.564	766.465	533.688	447.488	739.465	513.517
18	0.17	799.276	1109.99	338.126	850.718	1111.03	285.628	815.065	1106.41	410.987	904.525	968.068	241.444	883.036	982.288	492.405	838.666	927.732	358.143	878.976	689.584	93.7698	671.552	731.407	141.208	707.767	760.732	207.448	637.083	783.446	209.399	582.326	730.936	282.655	805.274	719.755	616.952	591.515	733.11	581.425	608.152	764.864	506.103	525.582	766.458	533.675	447.501	739.447	513.502
19	0.18	799.311	1109.95	338.192	850.713	1111.03	285.671	815.144	1106.37	411.03	904.512	968.045	241.452	883.055	982.269	492.408	838.731	927.697	358.144	878.996	689.569	93.7485	671.53	731.409	141.231	707.824	760.679	207.431	637.144	783.392	209.388	580.156	731.909	283.335	805.255	719.723	616.976	591.553	733.106	581.44	608.2	764.843	506.105	525.61	766.437	533.689	447.516	739.436	513.538
20	0.19	799.326	1109.99	338.238	850.695	1111.03	285.693	815.206	1106.36	411.071	904.545	968.044	241.459	883.068	982.274	492.408	838.774	927.691	358.146	879.024	689.579	93.7509	671.516	731.391	141.256	707.852	760.715	207.429	637.137	783.399	209.419	583.307	730.467	282.42	805.282	719.713	616.989	591.534	733.065	581.468	608.192	764.843	506.117	525.607	766.41	533.725	447.52	739.445	513.557
21	0.2	799.174	1110.1	338.318	850.587	1111.08	285.727	815.216	1106.38	411.102	904.532	968.031	241.437	883.077	982.277	492.41	838.776	927.725	358.137	879.047	689.604	93.7917	671.494	731.393	141.236	707.789	760.814	207.454	637.101	783.486	209.436	584.047	730.174	282.187	805.282	719.703	616.99	591.53	733.014	581.484	608.162	764.867	506.13	525.625	766.394	533.76	447.473	739.431	513.546
22	0.21	799.068	1110.18	338.395	850.432	1111.19	285.818	815.215	1106.4	411.148	904.514	968.008	241.439	883.061	982.289	492.402	838.736	927.789	358.143	879.088	689.67	93.8443	671.46	731.409	141.221	707.757	760.916	207.485	637.097	783.583	209.424	584.143	730.223	282.147	805.285	719.707	616.968	591.524	732.959	581.49	608.136	764.927	506.166	525.616	766.38	533.797	447.455	739.433	513.567
23	0.22	799.054	1110.27	338.494	850.346	1111.28	285.916	815.228	1106.43	411.238	904.512	968.017	241.452	883.082	982.32	492.428	838.697	927.863	358.177	879.134	689.73	93.9082	671.477	731.407	141.253	707.716	761.01	207.573	637.073	783.648	209.476	584.113	730.289	282.173	805.357	719.746	616.986	591.567	732.936	581.538	608.12	765.004	506.209	525.611	766.411	533.878	447.592	739.395	513.536
24	0.23	799.057	1110.33	338.583	850.284	1111.32	285.992	815.247	1106.44	411.304	904.521	968.038	241.461	883.117	982.333	492.435	838.646	927.906	358.194	879.131	689.747	93.937	671.48	731.389	141.248	707.681	761.032	207.619	637.061	783.674	209.508	584.06	730.324	282.203	805.388	719.767	617.006	591.6	732.922	581.582	608.093	765.068	506.241	525.614	766.445	533.978	447.947	739.333	513.384
25	0.24	799.025	1110.3	338.623	850.27	1111.3	285.982	815.262	1106.42	411.322	904.544	968.057	241.419	883.102	982.319	492.405	838.66	927.874	358.164	879.073	689.696	93.886	671.488	731.382	141.213	707.723	760.962	207.548	637.05	783.629	209.487	584.054	730.293	282.183	805.351	719.759	617.003	591.578	732.883	581.578	608.08	765.091	506.267	525.59	766.46	534.046	447.859	739.341	513.463
26	0.25	799.036	1110.15	338.628	850.311	1111.21	285.914	815.299	1106.37	411.328	904.52	968.066	241.368	883.07	982.295	492.359	838.692	927.816	358.107	879.016	689.623	93.7835	671.465	731.417	141.218	707.746	760.856	207.446	637.097	783.517	209.394	584.171	730.176	282.112	805.327	719.772	616.995	591.584	732.851	581.585	608.058	765.109	506.25	525.55	766.485	534.076	447.556	739.408	513.67
27	0.26	799.077	1110.03	338.653	850.339	1111.11	285.876	815.358	1106.32	411.356	904.541	968.083	241.346	883.075	982.277	492.338	838.758	927.758	358.081	878.972	689.56	93.7177	671.512	731.407	141.196	707.807	760.767	207.356	637.132	783.431	209.34	584.262	730.053	282.053	805.368	719.82	617.019	591.436	733.05	581.776	608.067	765.131	506.247	525.526	766.508	534.116	447.534	739.452	513.709
28	0.27	799.08	1109.96	338.727	850.296	1111.1	285.9	815.398	1106.29	411.43	904.526	968.075	241.359	883.037	982.267	492.324	838.813	927.712	358.068	878.94	689.517	93.7053	671.479	731.403	141.197	707.824	760.71	207.337	637.133	783.396	209.334	584.315	730.005	282.053	805.394	719.85	617.036	591.214	733.318	581.995	608.097	765.166	506.253	525.492	766.519	534.172	447.425	739.485	513.782
29	0.28	799.042	1109.95	338.823	850.169	1111.13	285.979	815.406	1106.28	411.523	904.521	968.059	241.362	883.027	982.272	492.317	838.764	927.726	358.067	878.927	689.518	93.7047	671.479	731.392	141.197	707.795	760.726	207.346	637.11	783.397	209.34	584.229	730.015	282.084	805.361	719.857	617.014	591.321	733.196	581.874	608.108	765.233	506.26	525.445	766.575	534.211	447.384	739.48	513.86
30	0.29	799.018	1109.98	338.916	849.959	1111.2	286.085	815.421	1106.28	411.622	904.502	968.029	241.351	883.05	982.291	492.324	838.732	927.769	358.073	878.965	689.557	93.7266	671.451	731.394	141.2	707.755	760.774	207.407	637.083	783.449	209.386	584.135	730.109	282.14	805.324	719.827	617	591.152	733.382	582.023	608.142	765.311	506.264	525.455	766.626	534.271	447.393	739.446	513.914
31	0.3	798.945	1110.07	339.042	849.72	1111.28	286.231	815.434	1106.27	411.743	904.468	967.989	241.365	883.068	982.308	492.35	838.694	927.816	358.125	879.034	689.616	93.7946	671.458	731.391	141.21	707.725	760.856	207.513	637.037	783.541	209.464	584.074	730.217	282.177	805.284	719.757	617.011	591.457	732.945	581.696	608.126	765.377	506.285	525.471	766.681	534.361	447.527	739.38	513.907
32	0.31	798.84	1110.19	339.2	849.569	1111.34	286.365	815.463	1106.27	411.868	904.452	967.962	241.406	883.089	982.31	492.38	838.667	927.848	358.176	879.083	689.648	93.8834	671.5	731.348	141.218	707.712	760.935	207.589	636.998	783.603	209.523	584.094	730.279	282.223	805.277	719.697	617.002	591.575	732.812	581.624	608.129	765.434	506.337	525.44	766.704	534.463	447.677	739.297	513.88
33	0.32	798.748	1110.22	339.319	849.45	1111.35	286.454	815.51	1106.28	411.968	904.457	967.971	241.425	883.086	982.305	492.377	838.661	927.865	358.196	879.116	689.659	93.8889	671.521	731.33	141.224	707.726	760.976	207.589	637.003	783.63	209.524	584.197	730.25	282.222	805.279	719.684	616.968	591.611	732.762	581.618	608.14	765.481	506.362	525.405	766.713	534.518	447.509	739.317	514.001
34	0.33	798.65	1110.13	339.388	849.334	1111.33	286.487	815.518	1106.23	412.01	904.454	967.978	241.416	883.093	982.294	492.365	838.693	927.854	358.169	879.094	689.617	93.8531	671.445	731.377	141.25	707.765	760.967	207.527	637.01	783.62	209.501	584.186	730.238	282.204	805.295	719.69	616.943	591.607	732.753	581.62	608.133	765.495	506.364	525.43	766.704	534.513	447.682	739.293	513.895
35	0.34	798.771	1109.92	339.34	849.293	1111.27	286.438	815.508	1106.18	412.011	904.442	967.995	241.39	883.067	982.276	492.349	838.705	927.791	358.117	879.052	689.545	93.8028	671.459	731.394	141.23	707.802	760.898	207.441	637.097	783.576	209.429	584.142	730.191	282.184	805.306	719.725	616.938	591.596	732.756	581.612	608.122	765.463	506.329	525.432	766.7	534.507	447.318	739.388	514.072
36	0.35	798.87	1109.75	339.322	849.288	1111.18	286.393	815.538	1106.13	412.006	904.446	968.024	241.365	883.054	982.265	492.334	838.741	927.702	358.092	879.033	689.501	93.7565	671.488	731.405	141.218	707.838	760.821	207.357	637.16	783.494	209.364	582.31	730.979	282.683	805.31	719.768	616.939	591.573	732.766	581.589	608.111	765.426	506.284	525.41	766.725	534.476	447.248	739.418	514.087
37	0.36	798.787	1109.67	339.37	849.239	1111.14	286.398	815.519	1106.09	412.033	904.422	968.031	241.345	883.034	982.252	492.307	838.733	927.683	358.08	878.991	689.492	93.7234	671.478	731.402	141.213	707.83	760.759	207.341	637.131	783.433	209.349	580.034	731.974	283.336	805.306	719.78	616.951	591.574	732.791	581.589	608.115	765.4	506.251	525.401	766.732	534.453	447.21	739.423	514.079
38	0.37	798.561	1109.68	339.49	849.15	1111.12	286.463	815.465	1106.08	412.099	904.409	968.03	241.368	882.992	982.254	492.307	838.677	927.699	358.117	878.961	689.506	93.7157	671.478	731.396	141.214	707.804	760.75	207.365	637.082	783.437	209.382	583.191	730.529	282.431	805.244	719.76	616.966	591.522	732.785	581.578	608.112	765.404	506.243	525.379	766.751	534.453	447.162	739.413	514.08
39	0.38	798.464	1109.68	339.608	849.059	1111.14	286.546	815.472	1106.08	412.189	904.368	968.016	241.399	882.993	982.255	492.339	838.689	927.708	358.152	878.969	689.542	93.7301	671.526	731.381	141.211	707.795	760.786	207.393	637.094	783.47	209.421	583.972	730.221	282.234	805.213	719.746	617.029	591.525	732.785	581.601	608.11	765.427	506.279	525.362	766.757	534.463	447.142	739.414	514.076
40	0.39	798.363	1109.74	339.724	849.021	1111.21	286.613	815.507	1106.09	412.261	904.395	968.007	241.425	883.013	982.263	492.358	838.768	927.706	358.173	879.005	689.589	93.7424	671.534	731.382	141.234	707.824	760.837	207.464	637.137	783.507	209.455	584.179	730.155	282.208	805.172	719.729	617.059	591.558	732.805	581.599	608.113	765.433	506.305	525.378	766.738	534.456	447.178	739.4	514.045
41	0.4	798.109	1109.85	339.821	848.922	1111.28	286.665	815.493	1106.1	412.321	904.389	968.002	241.418	883.016	982.269	492.368	838.729	927.755	358.175	879.05	689.644	93.7815	671.557	731.391	141.209	707.809	760.901	207.491	637.088	783.57	209.479	584.269	730.15	282.176	805.176	719.71	617.046	591.547	732.822	581.563	608.124	765.445	506.317	525.409	766.718	534.412	447.204	739.398	513.968
42	0.41	797.814	1109.96	339.926	848.769	1111.3	286.72	815.467	1106.11	412.409	904.357	968.005	241.405	883.042	982.274	492.393	838.601	927.802	358.214	879.055	689.674	93.834	671.492	731.383	141.199	707.73	760.952	207.523	636.973	783.621	209.523	584.153	730.241	282.186	805.203	719.67	617.062	591.56	732.821	581.577	608.115	765.447	506.349	525.406	766.717	534.373	447.403	739.351	513.791
43	0.42	797.702	1109.98	340.021	848.729	1111.28	286.76	815.514	1106.08	412.479	904.384	968	241.423	883.052	982.257	492.408	838.59	927.788	358.235	879.044	689.655	93.8463	671.442	731.365	141.212	707.691	760.932	207.533	636.953	783.61	209.522	584.151	730.227	282.189	805.159	719.621	617.05	591.524	732.843	581.588	608.126	765.396	506.357	525.419	766.703	534.326	447.638	739.29	513.62
44	0.43	797.865	1109.86	340.023	848.752	1111.25	286.776	815.581	1106.03	412.504	904.387	967.983	241.435	883.057	982.22	492.398	838.679	927.731	358.211	879.053	689.609	93.7968	671.482	731.371	141.211	707.742	760.868	207.499	637.055	783.554	209.459	584.289	730.137	282.129	805.184	719.606	617.035	591.501	732.878	581.571	608.145	765.297	506.337	525.473	766.684	534.232	447.39	739.342	513.718
45	0.44	798.077	1109.73	339.994	848.769	1111.2	286.758	815.585	1106	412.509	904.372	967.968	241.415	883.044	982.207	492.38	838.748	927.704	358.177	879.036	689.57	93.7395	671.494	731.373	141.2	707.795	760.805	207.431	637.138	783.477	209.412	584.299	730.091	282.111	805.194	719.614	616.99	591.529	732.933	581.556	608.161	765.194	506.29	525.525	766.609	534.093	447.419	739.346	513.603
46	0.45	797.987	1109.7	340.05	848.737	1111.16	286.786	815.586	1105.99	412.535	904.346	967.958	241.405	883.024	982.203	492.374	838.777	927.656	358.153	878.973	689.536	93.7239	671.508	731.366	141.186	707.768	760.772	207.412	637.137	783.432	209.39	584.23	730.076	282.102	805.171	719.604	616.953	591.564	733.004	581.526	608.135	765.066	506.253	525.521	766.497	533.902	447.414	739.365	513.45
47	0.46	797.933	1109.72	340.11	848.724	1111.16	286.835	815.628	1105.99	412.588	904.365	967.965	241.417	883.02	982.212	492.383	838.749	927.662	358.173	878.968	689.546	93.7248	671.498	731.382	141.214	707.767	760.777	207.431	637.088	783.436	209.404	584.185	730.106	282.119	805.151	719.585	616.951	591.531	733.055	581.518	608.089	764.93	506.193	525.487	766.359	533.709	447.446	739.392	513.279
48	0.47	797.864	1109.77	340.153	848.762	1111.17	286.833	815.662	1106	412.625	904.392	967.974	241.419	883.027	982.217	492.386	838.779	927.68	358.18	879	689.579	93.7308	671.5	731.38	141.209	707.789	760.786	207.436	637.055	783.475	209.42	584.198	730.111	282.139	805.189	719.602	616.95	591.491	733.125	581.458	608.096	764.844	506.136	525.484	766.307	533.541	447.515	739.416	513.122
49	0.48	797.734	1109.85	340.233	848.705	1111.21	286.869	815.689	1106.01	412.679	904.429	967.983	241.406	883.023	982.224	492.378	838.804	927.697	358.182	879.009	689.601	93.7386	671.476	731.418	141.222	707.795	760.818	207.444	637.066	783.502	209.43	584.204	730.137	282.154	805.2	719.637	616.915	591.466	733.212	581.338	608.15	764.924	506.093	525.5	766.445	533.519	447.508	739.429	513.153
50	0.49	797.644	1109.94	340.319	848.632	1111.25	286.922	815.699	1106.03	412.748	904.42	968.002	241.396	883.034	982.228	492.382	838.822	927.736	358.183	879.018	689.628	93.762	671.474	731.446	141.235	707.757	760.882	207.491	637.066	783.555	209.462	584.164	730.21	282.169	805.151	719.641	616.914	591.505	733.271	581.281	608.154	765.114	506.07	525.516	766.684	533.645	447.402	739.413	513.359
51	0.5	797.508	1110.01	340.434	848.613	1111.28	286.973	815.755	1106.02	412.84	904.439	968.003	241.429	883.056	982.216	492.397	838.805	927.757	358.222	879.036	689.642	93.7826	671.475	731.426	141.237	707.76	760.917	207.512	637.043	783.599	209.48	584.123	730.256	282.179	805.094	719.604	616.908	591.524	733.258	581.291	608.128	765.3	506.117	525.514	766.853	533.856	447.288	739.381	513.599
52	0.51	797.52	1110	340.504	848.607	1111.28	287.008	815.837	1106	412.902	904.443	967.973	241.452	883.098	982.194	492.403	838.835	927.725	358.231	879.079	689.633	93.7844	671.47	731.42	141.228	707.773	760.904	207.499	637.066	783.596	209.466	584.158	730.218	282.163	805.05	719.544	616.888	591.509	733.19	581.323	608.102	765.439	506.195	525.435	766.909	534.046	447.189	739.338	513.756
53	0.52	797.584	1109.96	340.515	848.622	1111.25	287	815.898	1105.98	412.931	904.474	967.975	241.444	883.134	982.177	492.391	838.866	927.71	358.218	879.081	689.621	93.7507	671.461	731.414	141.21	707.796	760.851	207.463	637.101	783.535	209.423	584.202	730.151	282.126	805.018	719.479	616.843	591.513	733.099	581.318	608.079	765.536	506.263	525.363	766.929	534.143	447.166	739.315	513.808
54	0.53	797.636	1109.91	340.527	848.62	1111.23	286.995	815.938	1105.94	412.952	904.487	967.96	241.448	883.129	982.16	492.386	838.887	927.688	358.218	879.048	689.599	93.7357	671.488	731.384	141.176	707.798	760.808	207.437	637.105	783.499	209.4	584.172	730.132	282.092	805.038	719.452	616.814	591.489	733.059	581.316	608.069	765.595	506.292	525.324	766.952	534.181	447.129	739.304	513.841
55	0.54	797.589	1109.94	340.574	848.616	1111.25	287.028	815.96	1105.93	412.971	904.474	967.944	241.455	883.127	982.157	492.401	838.889	927.679	358.22	879.031	689.612	93.7481	671.477	731.362	141.197	707.752	760.815	207.465	637.069	783.477	209.405	584.213	730.118	282.087	805.054	719.458	616.832	591.469	733.042	581.328	608.113	765.629	506.308	525.362	766.979	534.209	447.076	739.316	513.897
56	0.55	797.579	1109.98	340.621	848.602	1111.27	287.079	815.961	1105.94	413.021	904.495	967.963	241.465	883.121	982.159	492.421	838.877	927.685	358.237	879.034	689.648	93.7667	671.481	731.368	141.217	707.735	760.818	207.487	637.025	783.492	209.429	584.26	730.139	282.108	805.053	719.462	616.852	591.449	733.054	581.362	608.115	765.641	506.323	525.348	767.021	534.241	447.062	739.312	513.932
57	0.56	797.571	1110.06	340.644	848.598	1111.31	287.102	815.955	1105.97	413.063	904.501	967.969	241.446	883.102	982.167	492.42	838.843	927.702	358.251	879.013	689.661	93.7654	671.502	731.379	141.223	707.743	760.831	207.501	637.029	783.53	209.443	584.201	730.142	282.124	805.067	719.483	616.88	591.427	733.062	581.369	608.099	765.641	506.34	525.346	767.047	534.26	447.073	739.303	513.952
58	0.57	797.52	1110.09	340.649	848.597	1111.33	287.105	815.977	1105.98	413.085	904.526	967.975	241.444	883.1	982.18	492.407	838.895	927.702	358.224	879.007	689.655	93.7566	671.525	731.387	141.226	707.741	760.843	207.512	637.061	783.551	209.444	584.18	730.152	282.121	805.092	719.514	616.916	591.464	733.062	581.344	608.087	765.657	506.352	525.343	767.051	534.282	447.047	739.303	513.954
59	0.58	797.487	1110.1	340.66	848.586	1111.33	287.089	815.972	1105.99	413.082	904.53	968.01	241.44	883.086	982.192	492.379	838.897	927.716	358.192	878.982	689.639	93.7417	671.533	731.388	141.191	707.75	760.86	207.48	637.089	783.543	209.424	584.11	730.178	282.099	805.073	719.543	616.942	591.456	733.046	581.351	608.094	765.682	506.354	525.329	767.069	534.303	447.04	739.317	513.955
60	0.59	797.476	1110.07	340.637	848.568	1111.35	287.082	815.969	1106	413.076	904.529	968.02	241.424	883.052	982.197	492.365	838.838	927.759	358.173	878.993	689.634	93.7371	671.532	731.397	141.171	707.756	760.869	207.426	637.086	783.549	209.413	584.072	730.173	282.08	805.05	719.594	616.96	591.404	733.037	581.356	608.098	765.692	506.347	525.323	767.105	534.314	447.039	739.34	513.963
61	0.6	797.494	1110.05	340.63	848.544	1111.34	287.096	815.967	1106	413.081	904.526	968.037	241.417	883.038	982.185	492.357	838.868	927.763	358.148	879.006	689.641	93.7223	671.529	731.413	141.157	707.768	760.853	207.424	637.058	783.554	209.4	584.064	730.184	282.056	805.071	719.633	616.984	591.419	733.028	581.348	608.104	765.703	506.343	525.322	767.114	534.319	447.06	739.338	513.944
62	0.61	797.511	1110.03	340.642	848.515	1111.34	287.103	815.963	1105.99	413.09	904.494	968.009	241.426	883.039	982.181	492.35	838.915	927.746	358.146	878.991	689.631	93.729	671.511	731.4	141.135	707.744	760.867	207.436	637.076	783.544	209.358	584.183	730.155	282.014	805.089	719.642	617.004	591.424	733.012	581.342	608.101	765.71	506.346	525.3	767.101	534.31	447.053	739.327	513.914
63	0.62	797.528	1109.96	340.653	848.473	1111.31	287.112	815.958	1105.94	413.114	904.479	967.983	241.441	883.044	982.17	492.343	838.948	927.702	358.158	878.979	689.621	93.7498	671.489	731.391	141.14	707.724	760.875	207.475	637.081	783.536	209.36	584.249	730.161	282.002	805.048	719.599	617.027	591.454	732.98	581.341	608.129	765.682	506.346	525.329	767.089	534.308	447.054	739.314	513.903
64	0.63	797.555	1109.88	340.673	848.45	1111.26	287.12	815.978	1105.9	413.106	904.482	967.963	241.425	883.079	982.155	492.355	839.017	927.654	358.153	878.998	689.617	93.7402	671.511	731.363	141.167	707.762	760.853	207.469	637.06	783.503	209.363	584.333	730.105	281.964	805.05	719.555	617.035	591.426	732.941	581.328	608.182	765.636	506.347	525.337	767.059	534.301	447.085	739.31	513.895
65	0.64	797.55	1109.85	340.686	848.463	1111.22	287.106	815.987	1105.87	413.103	904.49	967.941	241.419	883.104	982.139	492.354	839.068	927.628	358.165	879.012	689.622	93.7474	671.497	731.366	141.184	707.755	760.829	207.477	637.117	783.485	209.349	584.37	730.076	281.95	805.096	719.543	617.041	591.411	732.89	581.336	608.22	765.622	506.336	525.367	767.026	534.288	447.095	739.325	513.9
66	0.65	797.53	1109.82	340.713	848.409	1111.21	287.118	815.948	1105.87	413.129	904.516	967.932	241.428	883.084	982.14	492.363	838.975	927.65	358.192	879.027	689.622	93.7554	671.543	731.353	141.176	707.783	760.831	207.473	637.156	783.497	209.37	584.324	730.122	281.979	805.084	719.524	617.041	591.423	732.911	581.361	608.203	765.596	506.34	525.421	766.991	534.271	447.12	739.32	513.88
67	0.66	797.42	1109.86	340.734	848.321	1111.19	287.116	815.891	1105.86	413.16	904.486	967.922	241.405	883.092	982.154	492.379	838.918	927.667	358.188	879.035	689.617	93.7708	671.585	731.366	141.156	707.758	760.858	207.485	637.1	783.53	209.426	584.227	730.173	282.014	805.065	719.521	617.02	591.44	732.924	581.349	608.17	765.583	506.349	525.436	766.973	534.25	447.146	739.3	513.833
68	0.67	797.358	1109.86	340.748	848.21	1111.19	287.123	815.868	1105.84	413.168	904.477	967.925	241.388	883.116	982.155	492.375	838.899	927.679	358.189	879.063	689.612	93.777	671.595	731.376	141.142	707.781	760.879	207.509	637.083	783.569	209.438	584.227	730.172	282.034	805.126	719.538	617.028	591.478	732.933	581.362	608.184	765.558	506.354	525.455	766.961	534.232	447.15	739.296	513.793
69	0.68	797.327	1109.82	340.742	848.128	1111.17	287.132	815.848	1105.81	413.166	904.493	967.925	241.391	883.119	982.155	492.363	838.866	927.685	358.202	879.07	689.594	93.7921	671.577	731.385	141.136	707.79	760.874	207.507	637.076	783.568	209.431	584.193	730.178	282.057	805.179	719.552	617.044	591.416	732.921	581.394	608.231	765.527	506.359	525.48	766.943	534.211	447.147	739.295	513.775
70	0.69	797.34	1109.71	340.723	848.067	1111.1	287.135	815.809	1105.77	413.173	904.475	967.913	241.383	883.091	982.15	492.345	838.84	927.667	358.199	879.038	689.549	93.7626	671.535	731.414	141.133	707.771	760.851	207.495	637.092	783.545	209.41	584.21	730.152	282.038	805.185	719.565	617.062	591.442	732.885	581.404	608.246	765.499	506.342	525.484	766.933	534.174	447.193	739.296	513.731
71	0.7	797.351	1109.61	340.681	847.974	1111.03	287.13	815.768	1105.73	413.168	904.428	967.906	241.36	883.08	982.142	492.323	838.873	927.63	358.172	879.036	689.521	93.7481	671.499	731.421	141.126	707.763	760.812	207.454	637.105	783.511	209.372	584.248	730.135	282.02	805.201	719.591	617.081	591.469	732.867	581.391	608.229	765.48	506.328	525.52	766.901	534.14	447.228	739.298	513.689
72	0.71	797.323	1109.58	340.67	847.897	1110.97	287.119	815.721	1105.71	413.168	904.414	967.909	241.364	883.05	982.137	492.298	838.911	927.604	358.129	879.027	689.514	93.7313	671.489	731.39	141.13	707.776	760.787	207.412	637.102	783.485	209.36	584.259	730.122	281.984	805.206	719.625	617.094	591.473	732.876	581.35	608.211	765.462	506.318	525.485	766.887	534.105	447.238	739.28	513.661
73	0.72	797.235	1109.59	340.693	847.785	1110.94	287.127	815.668	1105.71	413.179	904.408	967.889	241.365	883.009	982.134	492.279	838.888	927.627	358.118	879.015	689.497	93.7272	671.525	731.355	141.12	707.778	760.799	207.411	637.125	783.483	209.348	584.198	730.148	281.973	805.191	719.647	617.088	591.477	732.909	581.32	608.212	765.458	506.309	525.513	766.882	534.091	447.235	739.283	513.614
74	0.73	797.171	1109.58	340.708	847.686	1110.94	287.131	815.619	1105.72	413.186	904.359	967.867	241.362	882.979	982.146	492.271	838.836	927.659	358.122	879	689.487	93.7296	671.537	731.343	141.116	707.787	760.805	207.418	637.1	783.501	209.373	584.192	730.16	281.977	805.18	719.649	617.109	591.442	732.912	581.324	608.194	765.44	506.305	525.512	766.878	534.077	447.255	739.28	513.584
75	0.74	797.099	1109.58	340.751	847.612	1110.95	287.146	815.595	1105.71	413.213	904.334	967.882	241.324	882.971	982.168	492.272	838.84	927.671	358.132	879.003	689.508	93.7228	671.545	731.354	141.128	707.773	760.835	207.446	637.094	783.542	209.405	584.228	730.172	282.022	805.196	719.637	617.14	591.442	732.908	581.362	608.208	765.427	506.324	525.508	766.862	534.072	447.303	739.266	513.585
76	0.75	797.056	1109.56	340.796	847.535	1110.93	287.182	815.569	1105.69	413.253	904.333	967.891	241.326	882.978	982.171	492.288	838.86	927.669	358.158	879.012	689.518	93.7426	671.541	731.361	141.145	707.74	760.86	207.49	637.046	783.58	209.448	584.23	730.178	282.085	805.182	719.619	617.153	591.45	732.887	581.399	608.22	765.418	506.347	525.495	766.848	534.091	447.274	739.275	513.593
77	0.76	797.034	1109.52	340.808	847.456	1110.89	287.179	815.562	1105.65	413.281	904.304	967.867	241.347	882.972	982.17	492.295	838.837	927.639	358.166	879.028	689.521	93.7505	671.539	731.361	141.166	707.759	760.863	207.501	637.066	783.579	209.448	584.184	730.178	282.117	805.135	719.613	617.152	591.463	732.878	581.443	608.254	765.413	506.337	525.509	766.85	534.094	447.235	739.294	513.615
78	0.77	797.002	1109.47	340.787	847.372	1110.86	287.167	815.548	1105.59	413.276	904.281	967.866	241.338	882.961	982.17	492.28	838.902	927.594	358.136	879.046	689.495	93.7271	671.503	731.377	141.191	707.804	760.844	207.467	637.113	783.556	209.438	584.179	730.16	282.109	805.136	719.629	617.148	591.435	732.875	581.436	608.243	765.406	506.333	525.495	766.838	534.077	447.241	739.296	513.62
79	0.78	796.983	1109.41	340.779	847.287	1110.83	287.17	815.505	1105.55	413.287	904.299	967.882	241.322	882.956	982.162	492.267	838.939	927.593	358.144	879.042	689.46	93.7126	671.528	731.351	141.213	707.803	760.833	207.448	637.084	783.527	209.443	584.235	730.147	282.109	805.198	719.65	617.147	591.459	732.885	581.424	608.218	765.392	506.343	525.507	766.825	534.076	447.244	739.307	513.622
80	0.79	796.925	1109.38	340.818	847.198	1110.8	287.178	815.439	1105.52	413.319	904.218	967.86	241.319	882.946	982.166	492.263	838.852	927.597	358.158	878.986	689.418	93.7217	671.534	731.335	141.201	707.785	760.833	207.453	637.019	783.512	209.472	584.212	730.133	282.145	805.201	719.647	617.143	591.458	732.879	581.453	608.219	765.389	506.362	525.502	766.819	534.073	447.23	739.3	513.621
81	0.8	796.901	1109.32	340.831	847.097	1110.77	287.175	815.388	1105.49	413.34	904.198	967.822	241.306	882.939	982.172	492.263	838.816	927.594	358.154	878.964	689.384	93.7314	671.506	731.363	141.235	707.777	760.801	207.448	637.013	783.497	209.468	584.224	730.085	282.147	805.197	719.629	617.133	591.47	732.865	581.472	608.211	765.369	506.365	525.531	766.815	534.086	447.219	739.293	513.627
82	0.81	796.901	1109.28	340.862	847.022	1110.73	287.178	815.365	1105.46	413.357	904.207	967.818	241.297	882.927	982.164	492.254	838.821	927.574	358.135	878.974	689.36	93.7051	671.489	731.359	141.244	707.779	760.769	207.439	637.056	783.481	209.439	584.268	730.088	282.139	805.224	719.658	617.124	591.447	732.89	581.463	608.181	765.356	506.351	525.544	766.821	534.091	447.231	739.313	513.597
83	0.82	796.796	1109.31	340.874	846.963	1110.72	287.185	815.33	1105.45	413.364	904.162	967.829	241.285	882.906	982.169	492.233	838.816	927.574	358.119	878.981	689.359	93.6795	671.454	731.36	141.244	707.802	760.782	207.412	637.11	783.476	209.408	584.347	730.096	282.132	805.242	719.694	617.098	591.439	732.928	581.447	608.201	765.348	506.346	525.523	766.838	534.081	447.241	739.344	513.598
84	0.83	796.704	1109.32	340.899	846.869	1110.71	287.19	815.228	1105.45	413.36	904.104	967.842	241.266	882.872	982.176	492.217	838.751	927.608	358.117	878.961	689.368	93.6724	671.431	731.373	141.237	707.779	760.82	207.38	637.089	783.499	209.412	584.312	730.116	282.145	805.223	719.716	617.061	591.409	732.949	581.455	608.193	765.357	506.345	525.511	766.831	534.083	447.206	739.364	513.623
85	0.84	796.65	1109.3	340.919	846.808	1110.72	287.208	815.201	1105.44	413.382	904.077	967.843	241.252	882.868	982.178	492.204	838.796	927.604	358.104	878.95	689.373	93.6778	671.408	731.362	141.246	707.779	760.832	207.383	637.101	783.524	209.43	584.209	730.171	282.183	805.238	719.733	617.064	591.434	732.923	581.476	608.188	765.36	506.342	525.526	766.819	534.077	447.226	739.34	513.604
86	0.85	796.63	1109.29	340.954	846.778	1110.71	287.229	815.23	1105.41	413.414	904.093	967.843	241.259	882.904	982.191	492.21	838.85	927.603	358.114	878.976	689.372	93.6945	671.445	731.356	141.244	707.796	760.853	207.403	637.104	783.548	209.47	584.264	730.173	282.199	805.264	719.73	617.075	591.468	732.921	581.485	608.201	765.362	506.348	525.558	766.81	534.075	447.252	739.318	513.602
87	0.86	796.586	1109.3	340.998	846.721	1110.7	287.247	815.197	1105.4	413.442	904.09	967.82	241.269	882.9	982.195	492.218	838.786	927.618	358.142	878.981	689.372	93.6946	671.425	731.356	141.27	707.775	760.872	207.447	637.044	783.566	209.511	584.22	730.188	282.221	805.249	719.696	617.068	591.5	732.912	581.489	608.216	765.361	506.378	525.608	766.789	534.081	447.241	739.292	513.604
88	0.87	796.508	1109.26	341.025	846.684	1110.67	287.27	815.159	1105.38	413.459	904.079	967.781	241.284	882.894	982.189	492.223	838.708	927.619	358.148	878.985	689.363	93.6875	671.391	731.352	141.308	707.723	760.864	207.498	637.021	783.553	209.522	584.145	730.201	282.245	805.203	719.663	617.056	591.47	732.872	581.5	608.2	765.342	506.387	525.606	766.771	534.096	447.245	739.275	513.579
89	0.88	796.452	1109.24	341.056	846.677	1110.63	287.27	815.179	1105.33	413.469	904.079	967.761	241.311	882.912	982.177	492.236	838.774	927.592	358.164	879.011	689.332	93.677	671.44	731.329	141.297	707.78	760.827	207.458	637.04	783.537	209.524	584.216	730.143	282.249	805.195	719.638	617.05	591.453	732.875	581.508	608.217	765.306	506.397	525.599	766.757	534.108	447.266	739.277	513.612
90	0.89	796.544	1109.18	341.062	846.657	1110.59	287.275	815.194	1105.28	413.46	904.099	967.771	241.33	882.928	982.172	492.248	838.896	927.525	358.178	879.02	689.318	93.662	671.439	731.326	141.317	707.827	760.776	207.431	637.117	783.501	209.512	584.295	730.099	282.259	805.252	719.646	617.073	591.458	732.895	581.531	608.24	765.282	506.404	525.599	766.757	534.117	447.261	739.296	513.636
91	0.9	796.566	1109.11	341.04	846.605	1110.57	287.261	815.157	1105.26	413.446	904.095	967.789	241.311	882.927	982.171	492.245	838.877	927.517	358.174	878.979	689.302	93.6451	671.393	731.341	141.326	707.842	760.748	207.407	637.121	783.489	209.488	584.351	730.04	282.231	805.269	719.658	617.065	591.437	732.896	581.538	608.227	765.268	506.393	525.602	766.763	534.119	447.238	739.287	513.629
92	0.91	796.537	1109.08	340.995	846.577	1110.55	287.228	815.107	1105.24	413.413	904.075	967.807	241.279	882.907	982.168	492.228	838.815	927.545	358.148	878.982	689.298	93.6508	671.359	731.344	141.291	707.832	760.745	207.389	637.109	783.461	209.465	584.367	730.023	282.208	805.238	719.671	617.053	591.408	732.89	581.528	608.2	765.269	506.377	525.587	766.776	534.112	447.209	739.282	513.624
93	0.92	796.527	1109.11	340.997	846.598	1110.55	287.24	815.099	1105.26	413.415	904.089	967.82	241.277	882.907	982.183	492.236	838.836	927.547	358.166	878.991	689.299	93.6764	671.4	731.342	141.27	707.801	760.779	207.411	637.096	783.48	209.486	584.381	730.058	282.208	805.259	719.696	617.078	591.439	732.903	581.542	608.215	765.296	506.379	525.573	766.793	534.1	447.209	739.307	513.627
94	0.93	796.477	1109.14	341.018	846.591	1110.57	287.253	815.078	1105.28	413.454	904.11	967.822	241.284	882.897	982.197	492.246	838.837	927.575	358.193	878.976	689.294	93.717	671.475	731.329	141.258	707.767	760.831	207.462	637.074	783.523	209.517	584.289	730.137	282.261	805.28	719.724	617.084	591.468	732.898	581.553	608.215	765.314	506.391	525.599	766.81	534.109	447.249	739.312	513.636
95	0.94	796.474	1109.15	341.004	846.574	1110.58	287.22	815.015	1105.3	413.459	904.105	967.819	241.26	882.873	982.203	492.232	838.785	927.592	358.192	878.947	689.306	93.7097	671.456	731.343	141.267	707.74	760.852	207.46	637.034	783.536	209.51	584.235	730.171	282.288	805.263	719.746	617.078	591.426	732.919	581.548	608.186	765.333	506.394	525.595	766.806	534.103	447.247	739.311	513.648
96	0.95	796.445	1109.17	340.964	846.558	1110.59	287.206	814.992	1105.31	413.441	904.093	967.824	241.228	882.872	982.203	492.21	838.78	927.591	358.155	878.969	689.314	93.6936	671.446	731.349	141.239	707.761	760.845	207.425	637.067	783.55	209.487	584.182	730.197	282.294	805.23	719.728	617.046	591.43	732.932	581.533	608.186	765.336	506.381	525.559	766.794	534.077	447.219	739.333	513.631
97	0.96	796.414	1109.2	340.975	846.52	1110.61	287.221	814.994	1105.32	413.459	904.055	967.817	241.238	882.887	982.211	492.218	838.787	927.588	358.134	878.999	689.304	93.694	671.431	731.358	141.268	707.77	760.831	207.427	637.089	783.56	209.496	584.133	730.203	282.314	805.256	719.737	617.053	591.456	732.922	581.561	608.199	765.329	506.372	525.549	766.786	534.084	447.238	739.333	513.623
98	0.97	796.487	1109.16	341.027	846.509	1110.6	287.235	815.038	1105.32	413.501	904.047	967.792	241.237	882.905	982.216	492.234	838.763	927.587	358.161	878.989	689.28	93.7201	671.465	731.351	141.282	707.798	760.843	207.439	637.076	783.534	209.546	584.238	730.172	282.31	805.31	719.75	617.079	591.451	732.901	581.575	608.22	765.331	506.398	525.582	766.781	534.103	447.248	739.349	513.634
99	0.98	796.509	1109.12	341.019	846.486	1110.61	287.23	815.081	1105.31	413.502	904.058	967.787	241.243	882.911	982.213	492.23	838.799	927.563	358.161	878.985	689.26	93.7172	671.453	731.36	141.297	707.802	760.821	207.432	637.094	783.526	209.529	584.227	730.164	282.304	805.287	719.7	617.051	591.465	732.879	581.551	608.231	765.305	506.409	525.583	766.76	534.115	447.251	739.34	513.647
100	0.99	796.493	1109.1	341.014	846.485	1110.61	287.207	815.111	1105.3	413.495	904.023	967.782	241.26	882.898	982.209	492.216	838.817	927.542	358.14	878.999	689.235	93.698	671.438	731.363	141.303	707.816	760.801	207.417	637.142	783.511	209.481	584.219	730.162	282.296	805.266	719.674	617.035	591.437	732.865	581.541	608.229	765.275	506.386	525.571	766.751	534.103	447.217	739.309	513.663
101	1	796.483	1109.11	341.036	846.476	1110.61	287.208	815.118	1105.3	413.504	903.996	967.763	241.258	882.88	982.209	492.214	838.782	927.54	358.14	878.991	689.203	93.6958	671.444	731.358	141.317	707.781	760.792	207.438	637.153	783.482	209.492	584.315	730.124	282.282	805.287	719.692	617.036	591.454	732.856	581.541	608.234	765.273	506.389	525.601	766.755	534.104	447.215	739.323	513.64
102	1.01	796.534	1109.1	341.028	846.471	1110.59	287.2	815.133	1105.31	413.516	903.948	967.745	241.251	882.877	982.224	492.214	838.771	927.54	358.146	878.966	689.19	93.688	671.413	731.337	141.311	707.783	760.794	207.427	637.153	783.473	209.501	584.428	730.052	282.248	805.313	719.727	617.049	591.51	732.847	581.533	608.26	765.272	506.397	525.611	766.745	534.11	447.241	739.316	513.626
103	1.02	796.489	1109.1	341.011	846.447	1110.6	287.173	815.132	1105.31	413.492	903.909	967.729	241.242	882.867	982.231	492.192	838.744	927.525	358.137	878.991	689.2	93.6626	671.422	731.316	141.273	707.791	760.793	207.406	637.17	783.484	209.467	584.375	730.082	282.232	805.302	719.743	617.025	591.493	732.855	581.541	608.255	765.271	506.388	525.601	766.754	534.092	447.273	739.308	513.587
104	1.03	796.44	1109.12	340.983	846.422	1110.62	287.167	815.094	1105.34	413.47	903.9	967.712	241.241	882.847	982.246	492.172	838.691	927.525	358.138	878.968	689.222	93.645	671.458	731.323	141.272	707.773	760.804	207.406	637.16	783.51	209.454	584.284	730.121	282.221	805.284	719.769	617.021	591.466	732.882	581.531	608.227	765.282	506.369	525.576	766.78	534.064	447.264	739.31	513.575
105	1.04	796.401	1109.19	340.982	846.41	1110.65	287.181	815.068	1105.38	413.482	903.951	967.729	241.254	882.843	982.26	492.175	838.693	927.551	358.143	878.955	689.223	93.6588	671.496	731.318	141.277	707.756	760.836	207.43	637.091	783.553	209.507	584.261	730.172	282.245	805.291	719.769	617.04	591.493	732.889	581.53	608.237	765.3	506.376	525.564	766.777	534.069	447.249	739.318	513.582
106	1.05	796.375	1109.23	341.007	846.359	1110.67	287.179	815.084	1105.4	413.48	903.976	967.742	241.25	882.852	982.268	492.169	838.699	927.578	358.147	878.95	689.217	93.6752	671.489	731.309	141.276	707.767	760.861	207.464	637.087	783.562	209.533	584.246	730.19	282.231	805.336	719.78	617.049	591.527	732.888	581.535	608.238	765.315	506.381	525.586	766.777	534.07	447.295	739.317	513.591
107	1.06	796.354	1109.25	340.972	846.333	1110.67	287.151	815.09	1105.4	413.446	903.983	967.744	241.208	882.858	982.27	492.136	838.737	927.582	358.112	878.973	689.203	93.6637	671.456	731.335	141.248	707.809	760.837	207.427	637.074	783.558	209.508	584.271	730.166	282.207	805.379	719.798	617.033	591.47	732.902	581.503	608.218	765.306	506.365	525.607	766.773	534.062	447.317	739.338	513.576
108	1.07	796.34	1109.28	340.936	846.351	1110.69	287.116	815.078	1105.4	413.42	903.987	967.767	241.17	882.853	982.269	492.126	838.698	927.602	358.091	878.993	689.19	93.6526	671.491	731.337	141.206	707.783	760.799	207.398	637.086	783.531	209.48	584.214	730.201	282.202	805.377	719.809	617.006	591.443	732.886	581.486	608.203	765.306	506.346	525.627	766.772	534.041	447.317	739.352	513.56
109	1.08	796.287	1109.31	340.954	846.383	1110.68	287.076	815.081	1105.39	413.425	904.008	967.753	241.15	882.834	982.262	492.125	838.657	927.601	358.072	878.974	689.171	93.6625	671.458	731.344	141.201	707.743	760.792	207.403	637.081	783.52	209.475	584.11	730.214	282.21	805.364	719.82	617.014	591.443	732.875	581.485	608.22	765.31	506.342	525.655	766.762	534.037	447.331	739.335	513.547
110	1.09	796.275	1109.32	340.995	846.411	1110.69	287.084	815.14	1105.38	413.453	904.005	967.734	241.134	882.839	982.254	492.122	838.683	927.584	358.066	878.959	689.138	93.647	671.454	731.339	141.204	707.766	760.772	207.393	637.072	783.504	209.488	584.227	730.133	282.201	805.35	719.804	617.016	591.472	732.857	581.501	608.23	765.296	506.35	525.649	766.759	534.027	447.322	739.321	513.548
111	1.1	796.348	1109.34	341.008	846.408	1110.72	287.114	815.209	1105.39	413.472	903.977	967.703	241.143	882.84	982.254	492.119	838.732	927.547	358.062	878.958	689.12	93.6499	671.446	731.316	141.193	707.811	760.76	207.378	637.103	783.513	209.479	584.295	730.126	282.196	805.367	719.782	617.025	591.48	732.818	581.524	608.25	765.27	506.346	525.649	766.742	534.017	447.341	739.315	513.55
112	1.11	796.452	1109.34	341.015	846.396	1110.73	287.142	815.208	1105.42	413.507	903.945	967.675	241.142	882.83	982.26	492.123	838.754	927.538	358.049	878.983	689.123	93.6757	671.435	731.328	141.234	707.823	760.788	207.399	637.09	783.502	209.48	584.313	730.099	282.168	805.341	719.768	617.039	591.464	732.814	581.521	608.246	765.252	506.365	525.64	766.723	534.041	447.314	739.318	513.56
113	1.12	796.513	1109.36	341.076	846.377	1110.74	287.169	815.238	1105.44	413.536	903.94	967.673	241.164	882.841	982.255	492.125	838.779	927.532	358.049	878.992	689.131	93.7007	671.47	731.311	141.244	707.783	760.792	207.44	637.087	783.506	209.496	584.342	730.069	282.161	805.331	719.763	617.041	591.498	732.794	581.506	608.241	765.253	506.356	525.642	766.711	534.04	447.293	739.299	513.562
114	1.13	796.492	1109.41	341.137	846.39	1110.76	287.181	815.301	1105.46	413.549	903.953	967.655	241.169	882.859	982.259	492.115	838.847	927.547	358.034	878.972	689.112	93.6825	671.487	731.279	141.24	707.789	760.782	207.427	637.133	783.5	209.464	584.402	730.047	282.177	805.363	719.786	617.037	591.527	732.808	581.503	608.267	765.243	506.343	525.643	766.704	534.037	447.272	739.29	513.576
115	1.14	796.486	1109.47	341.143	846.41	1110.79	287.167	815.323	1105.5	413.551	903.945	967.654	241.141	882.848	982.277	492.082	838.782	927.597	358.027	878.986	689.119	93.6607	671.492	731.3	141.215	707.811	760.799	207.398	637.154	783.515	209.444	584.335	730.089	282.169	805.389	719.821	617.007	591.522	732.828	581.466	608.239	765.26	506.331	525.621	766.72	534.019	447.27	739.302	513.568
116	1.15	796.416	1109.54	341.143	846.392	1110.83	287.163	815.306	1105.54	413.56	903.945	967.685	241.113	882.821	982.291	492.071	838.748	927.62	358.007	878.98	689.13	93.6392	671.496	731.333	141.209	707.787	760.818	207.404	637.117	783.528	209.467	584.246	730.154	282.144	805.377	719.82	616.975	591.493	732.857	581.456	608.211	765.266	506.313	525.61	766.748	534	447.275	739.302	513.556
117	1.16	796.44	1109.59	341.134	846.396	1110.84	287.165	815.316	1105.56	413.552	903.954	967.704	241.088	882.815	982.297	492.068	838.799	927.641	357.992	878.968	689.141	93.6367	671.486	731.357	141.198	707.771	760.827	207.434	637.089	783.539	209.491	584.235	730.178	282.125	805.371	719.836	616.969	591.493	732.858	581.467	608.187	765.261	506.308	525.616	766.756	533.991	447.267	739.303	513.56
118	1.17	796.559	1109.58	341.107	846.44	1110.86	287.147	815.355	1105.57	413.549	903.939	967.704	241.096	882.865	982.301	492.073	838.909	927.645	357.99	878.958	689.163	93.6114	671.459	731.361	141.22	707.787	760.821	207.435	637.137	783.543	209.465	584.304	730.133	282.125	805.415	719.873	616.981	591.457	732.872	581.48	608.196	765.28	506.318	525.644	766.75	533.997	447.292	739.301	513.57
119	1.18	796.601	1109.58	341.086	846.481	1110.88	287.166	815.36	1105.58	413.543	903.948	967.707	241.104	882.866	982.3	492.07	838.927	927.645	357.987	878.931	689.178	93.584	671.431	731.367	141.243	707.806	760.813	207.405	637.154	783.534	209.46	584.309	730.1	282.132	805.411	719.887	616.978	591.418	732.864	581.473	608.201	765.286	506.313	525.621	766.749	533.999	447.276	739.305	513.571
120	1.19	796.56	1109.61	341.071	846.502	1110.9	287.176	815.345	1105.6	413.517	903.918	967.708	241.106	882.851	982.307	492.062	838.88	927.663	357.992	878.901	689.2	93.5817	671.433	731.347	141.232	707.785	760.815	207.427	637.143	783.52	209.454	584.293	730.103	282.126	805.346	719.873	616.972	591.4	732.85	581.476	608.208	765.267	506.307	525.603	766.755	534	447.261	739.332	513.534
121	1.2	796.58	1109.63	341.073	846.546	1110.92	287.183	815.359	1105.61	413.514	903.884	967.703	241.125	882.867	982.312	492.069	838.896	927.672	358.004	878.91	689.213	93.5954	671.439	731.335	141.22	707.831	760.821	207.414	637.143	783.524	209.452	584.308	730.091	282.142	805.374	719.878	616.991	591.417	732.823	581.488	608.206	765.265	506.328	525.654	766.742	534.01	447.288	739.316	513.528
122	1.21	796.574	1109.68	341.091	846.554	1110.94	287.192	815.376	1105.63	413.532	903.898	967.724	241.128	882.866	982.324	492.088	838.895	927.706	358.023	878.903	689.202	93.5925	671.439	731.34	141.217	707.831	760.813	207.423	637.108	783.534	209.488	584.26	730.135	282.198	805.415	719.903	617.018	591.442	732.818	581.515	608.215	765.267	506.348	525.645	766.725	534.02	447.291	739.302	513.533
123	1.22	796.473	1109.75	341.092	846.526	1110.96	287.181	815.342	1105.66	413.525	903.872	967.723	241.134	882.826	982.343	492.085	838.915	927.736	358.01	878.903	689.199	93.5872	671.418	731.355	141.218	707.793	760.827	207.423	637.047	783.543	209.5	584.172	730.188	282.212	805.37	719.899	616.973	591.44	732.835	581.516	608.218	765.258	506.331	525.613	766.739	534.018	447.299	739.312	513.531
124	1.23	796.422	1109.79	341.075	846.548	1110.96	287.157	815.371	1105.66	413.495	903.901	967.733	241.124	882.826	982.337	492.08	838.963	927.742	358.004	878.93	689.186	93.5822	671.416	731.339	141.22	707.8	760.814	207.405	637.081	783.519	209.483	584.236	730.161	282.186	805.364	719.892	616.948	591.464	732.839	581.495	608.231	765.254	506.322	525.572	766.741	534.019	447.303	739.315	513.538
125	1.24	796.516	1109.76	341.056	846.607	1110.93	287.145	815.429	1105.66	413.482	903.928	967.711	241.143	882.864	982.331	492.086	839.014	927.753	358.015	878.921	689.173	93.5806	671.451	731.311	141.23	707.805	760.794	207.393	637.11	783.518	209.488	584.239	730.141	282.192	805.382	719.875	616.952	591.507	732.815	581.516	608.26	765.233	506.34	525.598	766.741	534.028	447.313	739.308	513.523
126	1.25	796.636	1109.72	341.058	846.647	1110.92	287.136	815.473	1105.65	413.493	903.911	967.698	241.16	882.881	982.328	492.093	839.104	927.749	358.014	878.927	689.145	93.5812	671.451	731.302	141.233	707.793	760.763	207.398	637.12	783.508	209.492	584.245	730.112	282.212	805.416	719.857	616.969	591.499	732.815	581.538	608.277	765.209	506.347	525.694	766.726	534.028	447.313	739.302	513.533
127	1.26	796.672	1109.73	341.051	846.633	1110.92	287.144	815.476	1105.65	413.489	903.913	967.685	241.144	882.885	982.326	492.091	839.147	927.739	358.01	878.931	689.107	93.5925	671.474	731.317	141.201	707.773	760.754	207.41	637.139	783.508	209.471	584.378	730.068	282.176	805.422	719.844	616.957	591.523	732.802	581.523	608.239	765.214	506.333	525.687	766.718	534.015	447.313	739.296	513.529
128	1.27	796.648	1109.73	341.022	846.668	1110.91	287.122	815.488	1105.66	413.467	903.923	967.689	241.132	882.89	982.329	492.083	839.191	927.76	357.994	878.978	689.103	93.6035	671.494	731.318	141.2	707.801	760.759	207.4	637.186	783.494	209.463	584.393	730.084	282.185	805.429	719.854	616.936	591.538	732.764	581.494	608.237	765.212	506.323	525.67	766.699	534.022	447.325	739.293	513.517
129	1.28	796.57	1109.77	341.018	846.659	1110.93	287.126	815.465	1105.69	413.46	903.923	967.685	241.132	882.891	982.338	492.076	839.192	927.801	358.007	879.011	689.117	93.6244	671.507	731.313	141.186	707.815	760.769	207.403	637.193	783.51	209.47	584.291	730.15	282.186	805.458	719.876	616.961	591.497	732.776	581.498	608.244	765.231	506.327	525.682	766.702	534.023	447.349	739.302	513.506
130	1.29	796.611	1109.75	341.009	846.622	1110.93	287.126	815.427	1105.71	413.442	903.957	967.702	241.116	882.9	982.361	492.073	839.165	927.861	358.01	878.968	689.139	93.6079	671.497	731.333	141.176	707.78	760.794	207.435	637.127	783.538	209.489	584.274	730.158	282.181	805.462	719.914	616.971	591.487	732.822	581.495	608.239	765.248	506.338	525.663	766.71	534.011	447.331	739.31	513.505
131	1.3	796.581	1109.75	340.988	846.603	1110.92	287.103	815.376	1105.72	413.426	903.923	967.726	241.097	882.879	982.371	492.064	839.22	927.888	357.987	878.937	689.157	93.6074	671.454	731.349	141.172	707.76	760.808	207.435	637.106	783.545	209.48	584.294	730.154	282.166	805.449	719.948	616.956	591.458	732.842	581.494	608.223	765.258	506.341	525.659	766.732	534.004	447.342	739.322	513.492
132	1.31	796.53	1109.76	340.968	846.592	1110.92	287.095	815.364	1105.71	413.408	903.899	967.737	241.09	882.855	982.373	492.054	839.295	927.898	357.98	878.969	689.17	93.6071	671.468	731.342	141.196	707.759	760.812	207.432	637.14	783.552	209.466	584.308	730.152	282.159	805.474	719.965	616.952	591.462	732.816	581.504	608.224	765.25	506.328	525.657	766.736	533.994	447.337	739.314	513.48
133	1.32	796.513	1109.76	340.966	846.582	1110.9	287.088	815.383	1105.68	413.404	903.912	967.742	241.095	882.857	982.372	492.058	839.371	927.867	357.996	878.966	689.17	93.5798	671.476	731.345	141.217	707.771	760.794	207.443	637.14	783.529	209.487	584.356	730.104	282.17	805.512	719.995	616.982	591.469	732.79	581.507	608.263	765.237	506.338	525.666	766.726	533.996	447.346	739.324	513.478
134	1.33	796.487	1109.74	340.937	846.541	1110.87	287.079	815.346	1105.64	413.404	903.862	967.749	241.1	882.857	982.376	492.062	839.403	927.86	358.014	878.918	689.177	93.56	671.442	731.349	141.248	707.787	760.776	207.428	637.075	783.51	209.531	584.29	730.101	282.187	805.501	719.985	617.015	591.528	732.756	581.535	608.275	765.225	506.367	525.677	766.702	534.018	447.341	739.32	513.49
135	1.34	796.512	1109.7	340.911	846.532	1110.84	287.062	815.318	1105.61	413.375	903.837	967.736	241.106	882.869	982.377	492.059	839.425	927.865	358.006	878.907	689.187	93.5295	671.425	731.328	141.25	707.808	760.767	207.396	637.081	783.492	209.524	584.244	730.123	282.197	805.469	719.956	617.012	591.533	732.765	581.535	608.261	765.194	506.362	525.676	766.697	534.012	447.312	739.326	513.469
136	1.35	796.476	1109.66	340.891	846.529	1110.81	287.046	815.286	1105.59	413.331	903.848	967.727	241.099	882.861	982.381	492.047	839.407	927.874	357.992	878.914	689.185	93.506	671.44	731.304	141.272	707.811	760.761	207.395	637.128	783.489	209.499	584.328	730.103	282.18	805.463	719.936	616.997	591.51	732.748	581.557	608.272	765.176	506.357	525.688	766.688	534.004	447.342	739.312	513.454
137	1.36	796.47	1109.64	340.848	846.539	1110.81	287.021	815.244	1105.57	413.296	903.879	967.721	241.081	882.851	982.379	492.04	839.494	927.857	357.983	878.894	689.173	93.4868	671.488	731.29	141.246	707.803	760.766	207.411	637.128	783.485	209.492	584.306	730.104	282.198	805.501	719.937	617.001	591.514	732.732	581.548	608.269	765.17	506.359	525.707	766.677	534.008	447.36	739.321	513.445
138	1.37	796.45	1109.64	340.804	846.51	1110.8	286.991	815.188	1105.58	413.246	903.842	967.735	241.072	882.858	982.382	492.039	839.503	927.899	357.949	878.899	689.178	93.4691	671.468	731.293	141.198	707.812	760.783	207.39	637.124	783.506	209.476	584.308	730.116	282.204	805.55	719.959	616.995	591.495	732.743	581.559	608.268	765.163	506.347	525.701	766.663	533.992	447.366	739.327	513.422
139	1.38	796.346	1109.68	340.737	846.521	1110.8	286.954	815.133	1105.59	413.169	903.817	967.77	241.061	882.864	982.404	492.026	839.471	927.946	357.919	878.909	689.204	93.4369	671.478	731.311	141.177	707.836	760.822	207.365	637.152	783.538	209.448	584.275	730.147	282.187	805.558	719.989	616.958	591.523	732.755	581.554	608.256	765.183	506.338	525.688	766.665	533.975	447.399	739.337	513.369
140	1.39	796.34	1109.68	340.689	846.502	1110.79	286.925	815.076	1105.6	413.103	903.825	967.786	241.027	882.841	982.42	492.009	839.46	927.97	357.92	878.909	689.247	93.4166	671.483	731.346	141.17	707.798	760.845	207.389	637.131	783.559	209.466	584.254	730.189	282.192	805.557	720.013	616.943	591.468	732.788	581.534	608.271	765.209	506.339	525.717	766.678	533.95	447.41	739.361	513.343
141	1.4	796.358	1109.65	340.645	846.437	1110.77	286.91	815.034	1105.6	413.059	903.805	967.75	241.035	882.832	982.43	492.009	839.519	927.979	357.926	878.889	689.257	93.4196	671.483	731.344	141.177	707.78	760.832	207.382	637.125	783.558	209.479	584.227	730.174	282.185	805.572	720.027	616.95	591.427	732.793	581.513	608.287	765.213	506.353	525.735	766.695	533.939	447.401	739.348	513.359
142	1.41	796.4	1109.58	340.564	846.425	1110.71	286.858	814.985	1105.56	412.986	903.782	967.739	241.038	882.827	982.432	492.003	839.554	927.979	357.919	878.86	689.249	93.4064	671.456	731.345	141.168	707.803	760.809	207.355	637.159	783.53	209.45	584.231	730.154	282.173	805.57	720.033	616.968	591.48	732.79	581.498	608.29	765.214	506.339	525.712	766.683	533.943	447.364	739.352	513.364
143	1.42	796.366	1109.52	340.498	846.453	1110.66	286.792	814.912	1105.52	412.898	903.805	967.749	241.024	882.813	982.438	491.985	839.587	927.967	357.89	878.878	689.235	93.3721	671.47	731.322	141.165	707.809	760.79	207.336	637.183	783.512	209.427	584.217	730.144	282.156	805.56	720.04	616.971	591.46	732.781	581.484	608.276	765.202	506.321	525.721	766.676	533.923	447.372	739.336	513.346
144	1.43	796.277	1109.5	340.459	846.441	1110.62	286.764	814.852	1105.5	412.832	903.813	967.741	241.007	882.797	982.444	491.982	839.561	927.993	357.897	878.89	689.218	93.3791	671.505	731.289	141.144	707.81	760.799	207.351	637.147	783.522	209.449	584.181	730.145	282.134	805.549	720.043	616.965	591.45	732.767	581.499	608.267	765.188	506.32	525.713	766.684	533.922	447.42	739.321	513.32
145	1.44	796.252	1109.45	340.401	846.427	1110.61	286.749	814.762	1105.48	412.76	903.792	967.756	241.002	882.796	982.444	491.987	839.584	928.014	357.891	878.873	689.189	93.3839	671.512	731.28	141.15	707.802	760.809	207.367	637.083	783.507	209.462	584.181	730.15	282.146	805.562	720.053	616.982	591.478	732.741	581.518	608.271	765.189	506.331	525.704	766.67	533.916	447.43	739.312	513.304
146	1.45	796.279	1109.36	340.294	846.426	1110.57	286.697	814.71	1105.42	412.663	903.787	967.768	240.991	882.79	982.448	491.98	839.618	928.004	357.875	878.887	689.164	93.3911	671.491	731.289	141.16	707.789	760.787	207.36	637.118	783.48	209.436	584.298	730.099	282.143	805.579	720.054	616.978	591.512	732.698	581.526	608.298	765.161	506.327	525.734	766.621	533.902	447.432	739.339	513.318
147	1.46	796.265	1109.31	340.193	846.467	1110.55	286.645	814.639	1105.38	412.554	903.788	967.763	240.984	882.784	982.444	491.953	839.63	928.008	357.85	878.934	689.176	93.4093	671.496	731.306	141.142	707.809	760.763	207.34	637.161	783.477	209.42	584.4	730.038	282.093	805.627	720.065	616.962	591.564	732.664	581.506	608.313	765.133	506.315	525.749	766.58	533.894	447.46	739.338	513.298
148	1.47	796.204	1109.3	340.127	846.451	1110.56	286.623	814.535	1105.39	412.486	903.8	967.77	240.976	882.788	982.447	491.958	839.601	928.052	357.85	878.948	689.201	93.4506	671.466	731.308	141.152	707.759	760.765	207.376	637.126	783.488	209.442	584.344	730.064	282.093	805.649	720.061	616.976	591.551	732.651	581.495	608.333	765.125	506.319	525.726	766.567	533.878	447.465	739.312	513.259
149	1.48	796.21	1109.3	340.096	846.45	1110.56	286.614	814.44	1105.41	412.447	903.822	967.786	240.98	882.777	982.467	491.989	839.67	928.073	357.889	878.917	689.226	93.4742	671.447	731.297	141.163	707.781	760.796	207.408	637.134	783.51	209.459	584.295	730.094	282.14	805.635	720.072	617.01	591.573	732.674	581.519	608.321	765.138	506.342	525.737	766.58	533.897	447.452	739.299	513.276
150	1.49	796.16	1109.28	340.055	846.461	1110.55	286.593	814.348	1105.44	412.396	903.786	967.81	240.993	882.763	982.5	492.011	839.672	928.108	357.91	878.887	689.25	93.4743	671.469	731.285	141.188	707.781	760.834	207.449	637.083	783.53	209.47	584.234	730.131	282.158	805.629	720.111	617.039	591.531	732.698	581.515	608.3	765.171	506.353	525.71	766.619	533.902	447.45	739.329	513.301
151	1.5	796.074	1109.31	340	846.475	1110.53	286.547	814.236	1105.44	412.308	903.8	967.825	241.005	882.73	982.519	492.015	839.665	928.125	357.884	878.852	689.27	93.465	671.501	731.282	141.141	707.763	760.833	207.414	637.066	783.523	209.456	584.232	730.162	282.154	805.561	720.117	617.032	591.483	732.74	581.506	608.242	765.196	506.341	525.683	766.632	533.888	447.416	739.34	513.313
152	1.51	796.094	1109.26	339.908	846.518	1110.52	286.488	814.139	1105.44	412.22	903.825	967.832	241.001	882.704	982.526	492.004	839.712	928.127	357.858	878.859	689.319	93.4724	671.532	731.298	141.128	707.773	760.814	207.372	637.123	783.496	209.429	584.249	730.153	282.116	805.539	720.132	617.022	591.413	732.775	581.483	608.217	765.211	506.304	525.686	766.671	533.887	447.394	739.36	513.307
153	1.52	796.142	1109.22	339.833	846.545	1110.52	286.424	814.084	1105.44	412.148	903.824	967.845	240.978	882.692	982.529	491.995	839.749	928.143	357.859	878.836	689.34	93.4477	671.513	731.314	141.135	707.773	760.793	207.36	637.113	783.497	209.41	584.235	730.13	282.06	805.542	720.15	617.038	591.42	732.781	581.473	608.217	765.219	506.285	525.671	766.693	533.87	447.393	739.355	513.291
154	1.53	796.163	1109.23	339.748	846.57	1110.52	286.372	814.021	1105.43	412.082	903.822	967.863	240.952	882.683	982.535	492.007	839.731	928.187	357.833	878.816	689.349	93.4235	671.495	731.316	141.135	707.797	760.796	207.321	637.084	783.504	209.404	584.257	730.119	282.039	805.564	720.162	617.053	591.466	732.767	581.467	608.194	765.221	506.287	525.633	766.678	533.854	447.397	739.352	513.267
155	1.54	796.136	1109.21	339.693	846.584	1110.53	286.37	813.977	1105.41	412.036	903.803	967.875	240.974	882.676	982.541	492.024	839.707	928.222	357.826	878.856	689.343	93.4442	671.531	731.296	141.12	707.744	760.807	207.351	637.115	783.512	209.399	584.304	730.107	282.046	805.558	720.143	617.035	591.468	732.746	581.492	608.22	765.221	506.306	525.652	766.669	533.869	447.373	739.36	513.289
156	1.55	796.149	1109.18	339.637	846.643	1110.52	286.336	813.983	1105.38	411.985	903.814	967.883	240.986	882.708	982.531	492.028	839.747	928.219	357.839	878.893	689.319	93.439	671.526	731.285	141.132	707.769	760.802	207.33	637.166	783.497	209.37	584.27	730.112	282.063	805.565	720.12	617.019	591.446	732.725	581.51	608.267	765.194	506.321	525.685	766.646	533.861	447.416	739.326	513.28
157	1.56	796.236	1109.14	339.555	846.74	1110.5	286.294	814.017	1105.35	411.944	903.825	967.871	240.987	882.758	982.523	492.032	839.808	928.212	357.844	878.894	689.29	93.4199	671.515	731.29	141.149	707.792	760.79	207.31	637.177	783.49	209.368	584.32	730.1	282.075	805.607	720.106	617.029	591.532	732.674	581.504	608.328	765.172	506.331	525.722	766.61	533.854	447.414	739.315	513.27
158	1.57	796.302	1109.12	339.488	846.815	1110.48	286.262	813.983	1105.34	411.894	903.819	967.835	241.006	882.766	982.515	492.045	839.773	928.221	357.862	878.919	689.289	93.4246	671.481	731.268	141.145	707.777	760.792	207.337	637.129	783.518	209.393	584.299	730.101	282.068	805.612	720.078	617.042	591.584	732.647	581.5	608.334	765.149	506.324	525.762	766.579	533.867	447.409	739.307	513.252
159	1.58	796.229	1109.14	339.437	846.841	1110.49	286.253	813.907	1105.35	411.843	903.836	967.839	241.011	882.743	982.511	492.06	839.765	928.241	357.874	878.917	689.301	93.4408	671.484	731.263	141.14	707.757	760.813	207.391	637.029	783.527	209.426	584.236	730.089	282.091	805.566	720.058	617.028	591.557	732.647	581.494	608.333	765.136	506.331	525.758	766.569	533.874	447.404	739.301	513.259
160	1.59	796.3	1109.1	339.36	846.892	1110.48	286.238	813.855	1105.36	411.783	903.834	967.879	241.02	882.752	982.513	492.08	839.824	928.261	357.903	878.89	689.326	93.4342	671.484	731.279	141.148	707.753	760.817	207.414	637.055	783.5	209.429	584.207	730.128	282.142	805.569	720.062	617.026	591.508	732.665	581.505	608.319	765.147	506.34	525.758	766.593	533.881	447.419	739.303	513.283
161	1.6	796.387	1109.08	339.263	846.973	1110.49	286.184	813.785	1105.38	411.69	903.877	967.88	241.016	882.796	982.535	492.085	839.808	928.284	357.898	878.865	689.357	93.4213	671.516	731.277	141.14	707.802	760.81	207.394	637.12	783.495	209.413	584.259	730.117	282.131	805.583	720.099	617.054	591.518	732.683	581.5	608.31	765.167	506.333	525.767	766.633	533.878	447.452	739.338	513.282
162	1.61	796.383	1109.07	339.16	847.04	1110.51	286.105	813.671	1105.41	411.558	903.88	967.891	241.015	882.793	982.549	492.068	839.826	928.297	357.852	878.841	689.369	93.4412	671.504	731.299	141.127	707.777	760.799	207.362	637.093	783.517	209.399	584.244	730.105	282.08	805.587	720.138	617.046	591.475	732.727	581.489	608.295	765.182	506.307	525.728	766.65	533.855	447.448	739.341	513.252
163	1.62	796.409	1109.09	339.035	847.131	1110.52	286.038	813.582	1105.43	411.458	903.907	967.933	241.024	882.777	982.555	492.057	839.847	928.297	357.831	878.83	689.385	93.4591	671.483	731.309	141.116	707.724	760.814	207.349	637.072	783.527	209.397	584.159	730.147	282.073	805.558	720.161	617.023	591.463	732.733	581.475	608.24	765.215	506.29	525.685	766.669	533.838	447.399	739.36	513.25
164	1.63	796.388	1109.13	338.976	847.296	1110.51	285.965	813.557	1105.45	411.401	903.947	967.969	241.036	882.776	982.568	492.083	839.833	928.34	357.86	878.838	689.417	93.4574	671.518	731.323	141.115	707.727	760.838	207.384	637.091	783.552	209.405	584.176	730.171	282.107	805.566	720.181	617.011	591.498	732.759	581.496	608.219	765.229	506.307	525.704	766.691	533.857	447.381	739.369	513.271
165	1.64	796.495	1109.11	338.926	847.383	1110.5	285.926	813.553	1105.45	411.355	903.928	967.975	241.058	882.805	982.579	492.123	839.867	928.373	357.918	878.823	689.42	93.4733	671.477	731.323	141.147	707.768	760.835	207.385	637.046	783.549	209.458	584.191	730.174	282.157	805.615	720.185	617.035	591.494	732.781	581.513	608.26	765.234	506.337	525.732	766.696	533.887	447.373	739.363	513.296
166	1.65	796.559	1109.08	338.837	847.451	1110.5	285.863	813.57	1105.44	411.291	903.886	967.972	241.057	882.794	982.565	492.128	839.827	928.377	357.908	878.832	689.411	93.4845	671.469	731.304	141.145	707.746	760.835	207.386	637.019	783.515	209.445	584.204	730.15	282.137	805.608	720.162	617.032	591.513	732.741	581.522	608.263	765.216	506.345	525.73	766.677	533.906	447.397	739.358	513.297
167	1.66	796.652	1109.04	338.748	847.576	1110.48	285.809	813.59	1105.42	411.222	903.864	967.974	241.072	882.785	982.557	492.128	839.865	928.339	357.896	878.874	689.385	93.5139	671.431	731.317	141.168	707.735	760.807	207.389	637.078	783.482	209.385	584.248	730.124	282.14	805.6	720.149	617.03	591.484	732.706	581.553	608.258	765.189	506.345	525.681	766.627	533.917	447.377	739.349	513.297
168	1.67	796.744	1109.02	338.701	847.668	1110.45	285.79	813.586	1105.41	411.182	903.881	967.976	241.112	882.82	982.56	492.152	839.916	928.326	357.938	878.89	689.385	93.5276	671.433	731.307	141.219	707.774	760.805	207.377	637.091	783.478	209.395	584.368	730.086	282.149	805.605	720.131	617.043	591.469	732.679	581.573	608.299	765.17	506.375	525.703	766.61	533.942	447.359	739.35	513.332
169	1.68	796.81	1109.03	338.684	847.683	1110.46	285.8	813.569	1105.43	411.163	903.889	967.96	241.118	882.831	982.566	492.172	839.916	928.363	357.976	878.872	689.374	93.5705	671.459	731.296	141.23	707.797	760.811	207.382	637.038	783.509	209.454	584.312	730.099	282.186	805.619	720.125	617.062	591.447	732.672	581.594	608.302	765.156	506.399	525.72	766.61	533.966	447.34	739.332	513.378
170	1.69	796.861	1109.02	338.638	847.782	1110.46	285.751	813.543	1105.45	411.125	903.916	967.964	241.112	882.808	982.566	492.186	839.875	928.399	357.978	878.881	689.37	93.5876	671.445	731.287	141.205	707.749	760.827	207.412	636.99	783.512	209.47	584.225	730.096	282.207	805.596	720.133	617.058	591.436	732.681	581.577	608.261	765.146	506.383	525.652	766.61	533.971	447.318	739.318	513.4
171	1.7	797.03	1109.03	338.562	847.936	1110.45	285.661	813.552	1105.47	411.083	903.927	967.948	241.11	882.819	982.577	492.187	839.919	928.388	357.961	878.916	689.387	93.5738	671.452	731.284	141.173	707.753	760.828	207.392	637.044	783.483	209.429	584.225	730.107	282.2	805.564	720.157	617.054	591.413	732.674	581.597	608.25	765.147	506.388	525.619	766.633	533.982	447.296	739.331	513.393
172	1.71	797.122	1109.02	338.539	848.011	1110.46	285.651	813.567	1105.48	411.083	903.928	967.97	241.118	882.831	982.588	492.209	839.951	928.404	357.977	878.898	689.377	93.5762	671.446	731.294	141.198	707.766	760.848	207.369	637.058	783.5	209.434	584.218	730.117	282.258	805.567	720.18	617.056	591.449	732.711	581.634	608.264	765.164	506.411	525.685	766.675	533.998	447.303	739.336	513.398
173	1.72	797.142	1109.04	338.515	848.041	1110.49	285.666	813.553	1105.52	411.082	903.924	968.001	241.121	882.834	982.611	492.229	839.767	928.499	358.016	878.891	689.395	93.6123	671.385	731.329	141.232	707.724	760.863	207.416	636.991	783.544	209.495	584.167	730.167	282.303	805.589	720.198	617.046	591.448	732.751	581.64	608.236	765.187	506.421	525.677	766.692	534.001	447.351	739.35	513.391
174	1.73	797.107	1109.09	338.461	848.101	1110.5	285.641	813.506	1105.54	411.036	903.921	968.013	241.114	882.82	982.625	492.227	839.692	928.558	357.996	878.869	689.412	93.6267	671.411	731.324	141.217	707.697	760.869	207.397	636.962	783.553	209.494	584.148	730.179	282.313	805.567	720.207	617.003	591.395	732.788	581.637	608.224	765.205	506.413	525.642	766.703	534.007	447.364	739.36	513.385
175	1.74	797.115	1109.11	338.408	848.238	1110.52	285.579	813.524	1105.54	410.995	903.94	968.042	241.106	882.825	982.625	492.224	839.724	928.541	357.974	878.883	689.429	93.6203	671.44	731.328	141.221	707.723	760.863	207.37	637.006	783.528	209.465	584.194	730.144	282.301	805.543	720.207	616.972	591.392	732.774	581.624	608.227	765.204	506.413	525.655	766.71	534.028	447.356	739.362	513.381
176	1.75	797.214	1109.09	338.4	848.338	1110.51	285.547	813.567	1105.52	410.978	903.915	968.041	241.109	882.855	982.62	492.236	839.768	928.518	357.994	878.878	689.422	93.5928	671.465	731.334	141.228	707.72	760.854	207.393	636.97	783.506	209.473	584.22	730.105	282.291	805.597	720.199	616.978	591.434	732.764	581.625	608.254	765.187	506.425	525.671	766.693	534.033	447.354	739.351	513.382
177	1.76	797.285	1109.1	338.368	848.393	1110.52	285.542	813.591	1105.52	410.976	903.935	968.058	241.114	882.874	982.612	492.254	839.777	928.512	357.994	878.842	689.398	93.5763	671.428	731.329	141.25	707.725	760.835	207.378	636.946	783.5	209.481	584.203	730.109	282.324	805.643	720.203	616.982	591.48	732.752	581.642	608.272	765.17	506.428	525.703	766.681	534.039	447.331	739.348	513.422
178	1.77	797.31	1109.13	338.324	848.454	1110.53	285.528	813.605	1105.5	410.954	903.928	968.068	241.114	882.868	982.604	492.237	839.77	928.498	357.975	878.845	689.409	93.5798	671.394	731.298	141.231	707.729	760.826	207.347	636.896	783.498	209.47	584.233	730.105	282.301	805.625	720.192	616.972	591.501	732.74	581.613	608.257	765.155	506.416	525.707	766.666	534.024	447.297	739.34	513.429
179	1.78	797.304	1109.12	338.308	848.534	1110.51	285.485	813.642	1105.48	410.93	903.942	968.074	241.113	882.848	982.6	492.231	839.751	928.477	357.976	878.839	689.412	93.5833	671.363	731.281	141.233	707.706	760.833	207.348	636.899	783.486	209.46	584.243	730.077	282.286	805.588	720.169	616.969	591.509	732.716	581.619	608.24	765.14	506.394	525.707	766.656	534.011	447.286	739.338	513.396
180	1.79	797.417	1109.08	338.281	848.639	1110.51	285.464	813.684	1105.48	410.926	903.937	968.089	241.125	882.841	982.599	492.245	839.783	928.466	357.979	878.837	689.426	93.5789	671.34	731.293	141.258	707.68	760.818	207.364	636.949	783.456	209.456	584.28	730.043	282.282	805.585	720.166	616.971	591.464	732.694	581.643	608.244	765.126	506.388	525.689	766.666	534.006	447.305	739.323	513.402
181	1.8	797.528	1109.06	338.258	848.718	1110.51	285.461	813.751	1105.48	410.937	903.962	968.104	241.137	882.851	982.607	492.249	839.829	928.473	357.973	878.868	689.452	93.5822	671.343	731.31	141.268	707.694	760.828	207.381	636.949	783.444	209.46	584.297	730.055	282.275	805.562	720.158	616.968	591.481	732.698	581.643	608.27	765.126	506.388	525.709	766.663	534.005	447.357	739.324	513.418
182	1.81	797.511	1109.13	338.267	848.706	1110.55	285.45	813.794	1105.52	410.946	903.942	968.124	241.138	882.868	982.618	492.256	839.747	928.552	357.988	878.886	689.487	93.6155	671.27	731.339	141.289	707.678	760.857	207.389	636.929	783.489	209.48	584.204	730.138	282.311	805.547	720.16	616.955	591.464	732.742	581.618	608.272	765.147	506.375	525.67	766.663	534.012	447.302	739.339	513.42
183	1.82	797.44	1109.23	338.278	848.681	1110.6	285.465	813.779	1105.57	410.949	903.967	968.145	241.143	882.872	982.634	492.254	839.621	928.629	357.995	878.894	689.526	93.6482	671.313	731.352	141.267	707.681	760.889	207.398	636.898	783.554	209.5	584.115	730.193	282.314	805.548	720.172	616.949	591.447	732.75	581.592	608.242	765.177	506.366	525.652	766.679	534.019	447.294	739.351	513.397
184	1.83	797.455	1109.28	338.288	848.687	1110.6	285.486	813.79	1105.62	410.97	904.02	968.146	241.131	882.877	982.645	492.269	839.571	928.682	358	878.901	689.548	93.6747	671.363	731.351	141.238	707.659	760.929	207.433	636.885	783.589	209.501	584.079	730.243	282.316	805.577	720.181	616.958	591.486	732.757	581.554	608.232	765.198	506.377	525.672	766.703	534.003	447.303	739.345	513.384
185	1.84	797.495	1109.29	338.288	848.751	1110.59	285.492	813.854	1105.64	410.982	904.042	968.121	241.121	882.893	982.651	492.271	839.641	928.69	358.01	878.89	689.54	93.6812	671.385	731.336	141.212	707.638	760.934	207.446	636.898	783.58	209.476	584.087	730.244	282.286	805.573	720.168	616.958	591.457	732.776	581.545	608.23	765.204	506.365	525.676	766.706	534.004	447.285	739.341	513.397
186	1.85	797.464	1109.28	338.282	848.82	1110.58	285.476	813.859	1105.62	410.967	904.066	968.121	241.121	882.9	982.645	492.261	839.649	928.649	357.987	878.874	689.487	93.6889	671.383	731.324	141.19	707.65	760.888	207.411	636.887	783.532	209.456	584.061	730.215	282.25	805.535	720.148	616.959	591.459	732.79	581.56	608.208	765.182	506.336	525.666	766.703	533.995	447.289	739.322	513.385
187	1.86	797.508	1109.22	338.245	848.924	1110.56	285.437	813.859	1105.6	410.959	904.12	968.12	241.118	882.886	982.626	492.252	839.654	928.545	357.95	878.851	689.465	93.709	671.425	731.304	141.198	707.665	760.833	207.378	636.876	783.487	209.434	584.124	730.151	282.208	805.51	720.148	616.949	591.436	732.778	581.548	608.172	765.165	506.298	525.679	766.718	533.984	447.264	739.313	513.385
188	1.87	797.685	1109.17	338.237	848.977	1110.53	285.437	813.936	1105.57	410.964	904.159	968.132	241.113	882.884	982.611	492.246	839.67	928.484	357.93	878.862	689.445	93.7078	671.435	731.329	141.225	707.708	760.784	207.349	636.942	783.43	209.397	584.247	730.049	282.156	805.516	720.157	616.941	591.446	732.764	581.504	608.168	765.133	506.278	525.673	766.713	533.979	447.267	739.332	513.389
189	1.88	797.807	1109.16	338.256	849.048	1110.52	285.42	814.026	1105.57	410.982	904.17	968.132	241.102	882.909	982.595	492.24	839.646	928.453	357.932	878.852	689.401	93.7198	671.435	731.338	141.214	707.732	760.754	207.343	636.991	783.391	209.368	584.296	730.035	282.142	805.522	720.146	616.955	591.454	732.784	581.467	608.176	765.109	506.265	525.666	766.687	533.969	447.272	739.323	513.406
190	1.89	797.757	1109.21	338.259	849.042	1110.55	285.412	814.054	1105.59	410.997	904.187	968.154	241.076	882.912	982.601	492.235	839.573	928.468	357.924	878.858	689.41	93.7588	671.468	731.325	141.16	707.713	760.769	207.36	636.964	783.403	209.361	584.232	730.072	282.115	805.519	720.137	616.93	591.463	732.787	581.437	608.174	765.11	506.248	525.671	766.677	533.952	447.278	739.307	513.396
191	1.9	797.704	1109.28	338.261	849.042	1110.57	285.414	814.084	1105.64	411.01	904.155	968.163	241.06	882.905	982.608	492.225	839.432	928.538	357.929	878.861	689.416	93.793	671.479	731.312	141.129	707.679	760.827	207.394	636.914	783.467	209.373	584.211	730.108	282.088	805.528	720.126	616.906	591.521	732.761	581.433	608.15	765.12	506.222	525.649	766.675	533.94	447.295	739.284	513.381
192	1.91	797.75	1109.33	338.272	849.066	1110.62	285.435	814.176	1105.7	411.051	904.144	968.156	241.073	882.917	982.64	492.242	839.385	928.627	357.937	878.901	689.46	93.8047	671.515	731.284	141.127	707.682	760.881	207.415	636.952	783.521	209.394	584.227	730.166	282.093	805.543	720.122	616.889	591.557	732.776	581.442	608.147	765.124	506.231	525.637	766.675	533.965	447.274	739.259	513.412
193	1.92	797.821	1109.39	338.3	849.054	1110.67	285.477	814.252	1105.76	411.092	904.153	968.143	241.083	882.934	982.668	492.261	839.373	928.688	357.96	878.943	689.506	93.8551	671.531	731.259	141.112	707.665	760.925	207.465	636.924	783.561	209.432	584.168	730.225	282.12	805.521	720.104	616.868	591.549	732.811	581.446	608.14	765.119	506.234	525.642	766.677	534.003	447.25	739.251	513.439
194	1.93	797.844	1109.45	338.282	849.006	1110.69	285.483	814.28	1105.82	411.091	904.125	968.119	241.072	882.901	982.682	492.258	839.262	928.717	357.959	878.94	689.518	93.8802	671.508	731.253	141.101	707.651	760.963	207.49	636.85	783.59	209.453	584.071	730.267	282.118	805.476	720.07	616.803	591.488	732.845	581.412	608.094	765.121	506.212	525.595	766.678	533.999	447.213	739.25	513.47
195	1.94	797.878	1109.45	338.245	849.037	1110.67	285.437	814.335	1105.81	411.059	904.123	968.105	241.063	882.88	982.674	492.245	839.288	928.651	357.927	878.923	689.49	93.8442	671.513	731.261	141.092	707.663	760.921	207.465	636.877	783.564	209.397	584.056	730.219	282.086	805.432	720.041	616.752	591.513	732.868	581.391	608.053	765.069	506.174	525.554	766.685	533.98	447.182	739.253	513.492
196	1.95	797.97	1109.4	338.256	849.157	1110.63	285.381	814.465	1105.78	411.064	904.122	968.098	241.078	882.9	982.657	492.244	839.328	928.542	357.903	878.921	689.452	93.8051	671.486	731.279	141.12	707.685	760.842	207.436	636.958	783.472	209.34	584.174	730.108	282.057	805.448	720.041	616.724	591.541	732.915	581.382	608.082	765.002	506.121	525.583	766.686	533.984	447.185	739.288	513.512
197	1.96	798.089	1109.37	338.259	849.262	1110.63	285.371	814.538	1105.77	411.077	904.156	968.112	241.092	882.922	982.658	492.232	839.345	928.457	357.897	878.886	689.419	93.7918	671.53	731.298	141.139	707.703	760.805	207.417	636.999	783.418	209.325	582.542	730.832	282.546	805.468	720.048	616.683	591.605	732.952	581.376	608.087	764.949	506.078	525.629	766.708	534.015	447.16	739.31	513.542
198	1.97	798.068	1109.39	338.246	849.276	1110.64	285.367	814.542	1105.79	411.049	904.191	968.149	241.082	882.914	982.654	492.202	839.267	928.417	357.877	878.866	689.411	93.7857	671.512	731.299	141.124	707.695	760.773	207.374	636.988	783.406	209.301	580.401	731.779	283.143	805.449	720.032	616.594	591.627	732.996	581.35	608.057	764.886	506.024	525.656	766.717	534.032	447.125	739.303	513.566
199	1.98	798.125	1109.41	338.227	849.319	1110.66	285.323	814.59	1105.83	411.005	904.185	968.144	241.049	882.905	982.66	492.167	839.304	928.418	357.828	878.859	689.406	93.7769	671.458	731.311	141.102	707.655	760.783	207.337	636.953	783.417	209.265	583.263	730.49	282.285	805.453	720.018	616.508	591.546	733.043	581.279	608.019	764.845	505.959	525.615	766.721	534.042	447.059	739.338	513.641
200	1.99	798.206	1109.49	338.252	849.373	1110.69	285.32	814.716	1105.9	411.014	904.231	968.164	241.028	882.932	982.685	492.169	839.323	928.445	357.827	878.889	689.421	93.7906	671.429	731.329	141.097	707.637	760.811	207.368	636.906	783.459	209.286	583.936	730.196	282.075	805.483	720.029	616.465	591.567	733.107	581.242	608.006	764.805	505.924	525.565	766.715	534.103	446.961	739.374	513.803
201	2	798.17	1109.61	338.307	849.402	1110.73	285.35	814.8	1105.96	411.07	904.253	968.178	241.044	882.945	982.709	492.179	839.301	928.52	357.859	878.87	689.433	93.8577	671.482	731.334	141.123	707.582	760.89	207.454	636.836	783.535	209.363	584.072	730.156	282.065	805.466	720.004	616.42	591.615	733.117	581.262	607.971	764.766	505.899	525.583	766.697	534.167	446.849	739.346	514.019
202	2.01	798.256	1109.69	338.339	849.384	1110.79	285.406	814.854	1106.01	411.117	904.261	968.192	241.051	882.922	982.725	492.17	839.234	928.619	357.88	878.898	689.463	93.9188	671.484	731.329	141.145	707.542	760.961	207.482	636.81	783.588	209.406	584.055	730.196	282.1	805.435	719.925	616.321	591.576	733.15	581.254	607.945	764.71	505.865	525.56	766.697	534.241	446.703	739.344	514.261
203	2.02	798.374	1109.74	338.362	849.335	1110.87	285.482	814.936	1106.06	411.139	904.26	968.177	241.058	882.951	982.742	492.172	839.21	928.676	357.893	878.947	689.493	93.9265	671.42	731.321	141.138	707.556	760.992	207.463	636.836	783.606	209.422	584.046	730.213	282.123	805.409	719.871	616.194	591.58	733.202	581.187	607.899	764.675	505.828	525.527	766.694	534.318	446.562	739.378	514.535
204	2.03	798.515	1109.79	338.38	849.442	1110.89	285.504	815.066	1106.09	411.167	904.327	968.165	241.071	882.996	982.742	492.186	839.225	928.692	357.916	878.979	689.492	93.9369	671.468	731.275	141.131	707.56	760.964	207.484	636.848	783.589	209.437	584.093	730.166	282.155	805.44	719.857	616.087	591.654	733.273	581.191	607.849	764.627	505.797	525.486	766.713	534.425	446.478	739.411	514.812
205	2.04	798.636	1109.83	338.394	849.596	1110.91	285.487	815.179	1106.13	411.161	904.333	968.141	241.06	882.979	982.735	492.166	839.297	928.598	357.878	878.946	689.44	93.9154	671.461	731.266	141.139	707.597	760.912	207.47	636.847	783.543	209.403	584.104	730.142	282.164	805.456	719.838	615.983	591.668	733.337	581.197	607.825	764.567	505.752	525.449	766.743	534.54	446.482	739.409	515.082
206	2.05	798.728	1109.89	338.376	849.717	1110.93	285.42	815.275	1106.17	411.122	904.313	968.138	241.029	882.944	982.741	492.114	839.291	928.526	357.825	878.905	689.375	93.866	671.431	731.269	141.138	707.636	760.848	207.388	636.888	783.476	209.344	582.333	730.904	282.616	805.465	719.802	615.854	591.664	733.379	581.16	607.778	764.526	505.7	525.385	766.762	534.623	446.433	739.425	515.274
207	2.06	798.821	1109.97	338.383	849.817	1110.97	285.388	815.39	1106.24	411.105	904.326	968.144	241.025	882.924	982.757	492.078	839.341	928.485	357.775	878.893	689.352	93.8344	671.459	731.27	141.11	707.654	760.82	207.317	636.94	783.436	209.313	580.126	731.885	283.234	805.451	719.763	615.71	591.624	733.433	581.141	607.76	764.488	505.644	525.315	766.783	534.718	446.432	739.458	515.47
208	2.07	798.915	1110.1	338.395	849.941	1111.03	285.42	815.521	1106.32	411.121	904.381	968.155	241.02	882.934	982.769	492.076	839.389	928.454	357.757	878.867	689.34	93.8493	671.485	731.289	141.099	707.679	760.8	207.305	636.981	783.411	209.293	583.222	730.475	282.357	805.424	719.738	615.602	591.677	733.508	581.116	607.753	764.429	505.589	525.287	766.795	534.817	446.467	739.467	515.731
209	2.08	799.007	1110.29	338.436	850.051	1111.1	285.448	815.681	1106.4	411.131	904.4	968.156	241.012	882.924	982.794	492.055	839.438	928.465	357.742	878.886	689.35	93.8504	671.497	731.277	141.091	707.681	760.818	207.348	636.974	783.433	209.309	584.031	730.14	282.157	805.396	719.717	615.527	591.709	733.575	581.081	607.696	764.386	505.536	525.236	766.826	534.906	446.406	739.481	516.004
210	2.09	799.071	1110.55	338.488	850.096	1111.25	285.499	815.829	1106.5	411.134	904.343	968.161	240.996	882.883	982.813	492.012	839.406	928.515	357.732	878.889	689.376	93.8548	671.464	731.261	141.119	707.637	760.842	207.393	636.96	783.466	209.318	584.128	730.116	282.143	805.363	719.684	615.439	591.747	733.653	581.062	607.639	764.346	505.486	525.152	766.843	534.965	446.387	739.491	516.243
211	2.1	799.06	1110.82	338.56	850.134	1111.41	285.576	815.996	1106.64	411.169	904.339	968.143	240.994	882.872	982.834	492.002	839.386	928.573	357.741	878.883	689.38	93.8727	671.435	731.244	141.155	707.675	760.867	207.378	636.907	783.496	209.363	584.093	730.157	282.135	805.367	719.655	615.359	591.761	733.692	581.039	607.619	764.298	505.454	525.076	766.851	535.05	446.41	739.499	516.464
212	2.11	799.17	1111.04	338.634	850.225	1111.55	285.639	816.213	1106.78	411.223	904.349	968.131	241	882.898	982.857	492.004	839.409	928.623	357.734	878.894	689.376	93.8812	671.465	731.262	141.147	707.677	760.869	207.389	636.882	783.529	209.4	584.131	730.166	282.147	805.377	719.627	615.305	591.793	733.744	581.021	607.61	764.271	505.418	525.117	766.847	535.159	446.427	739.537	516.721
213	2.12	799.244	1111.25	338.68	850.331	1111.69	285.678	816.449	1106.94	411.252	904.347	968.145	240.976	882.88	982.87	491.96	839.433	928.648	357.704	878.911	689.368	93.8733	671.508	731.242	141.117	707.642	760.862	207.382	636.901	783.537	209.387	584.163	730.156	282.162	805.371	719.61	615.229	591.87	733.811	580.992	607.598	764.221	505.361	525.099	766.863	535.237	446.41	739.568	516.999
214	2.13	799.298	1111.48	338.701	850.427	1111.85	285.73	816.659	1107.12	411.268	904.331	968.146	240.954	882.853	982.871	491.909	839.295	928.665	357.667	878.915	689.353	93.8737	671.485	731.242	141.108	707.632	760.89	207.372	636.875	783.534	209.37	584.077	730.184	282.127	805.357	719.597	615.125	591.897	733.888	580.935	607.578	764.179	505.297	525.075	766.891	535.294	446.349	739.582	517.277
215	2.14	799.391	1111.72	338.745	850.539	1112.04	285.77	816.894	1107.29	411.314	904.352	968.156	240.921	882.842	982.874	491.883	839.235	928.658	357.645	878.921	689.324	93.8873	671.469	731.245	141.103	707.614	760.92	207.361	636.871	783.541	209.356	582.271	731.001	282.642	805.337	719.56	615.047	591.924	733.959	580.906	607.537	764.118	505.242	525.078	766.905	535.37	446.294	739.607	517.56
216	2.15	799.571	1111.96	338.781	850.675	1112.2	285.825	817.199	1107.47	411.36	904.369	968.168	240.895	882.834	982.869	491.859	839.364	928.629	357.615	878.961	689.294	93.9004	671.464	731.273	141.14	707.624	760.89	207.369	636.902	783.499	209.349	580.091	731.953	283.284	805.326	719.507	614.992	591.99	734.007	580.889	607.519	764.055	505.189	525.064	766.916	535.416	446.215	739.615	517.806
217	2.16	799.693	1112.2	338.788	850.829	1112.38	285.843	817.468	1107.65	411.371	904.358	968.175	240.879	882.834	982.866	491.829	839.393	928.6	357.58	878.977	689.284	93.8735	671.445	731.289	141.143	707.635	760.877	207.365	636.922	783.478	209.327	583.093	730.582	282.388	805.277	719.461	614.92	592.065	734.103	580.843	607.506	763.996	505.106	525.013	766.93	535.438	446.166	739.634	518.014
218	2.17	799.856	1112.45	338.804	850.951	1112.56	285.836	817.678	1107.85	411.382	904.297	968.134	240.874	882.825	982.867	491.808	839.371	928.589	357.541	878.94	689.272	93.8641	671.43	731.254	141.124	707.615	760.862	207.364	636.849	783.477	209.342	582.104	730.994	282.678	805.26	719.446	614.862	592.096	734.204	580.796	607.46	763.936	505.026	524.982	766.951	535.449	446.23	739.537	518.089
219	2.18	798.359	1113.37	339.279	851.123	1112.75	285.858	817.902	1108.04	411.428	904.285	968.101	240.867	882.811	982.867	491.803	839.44	928.591	357.547	878.893	689.25	93.8695	671.412	731.238	141.124	707.654	760.841	207.345	636.841	783.469	209.354	580.104	731.863	283.281	805.245	719.434	614.83	592.119	734.305	580.772	607.427	763.879	504.975	524.991	766.996	535.466	446.278	739.438	518.134
220	2.19	794.863	1115.08	340.282	851.31	1112.92	285.854	818.118	1108.23	411.45	904.296	968.083	240.865	882.808	982.884	491.788	839.48	928.58	357.562	878.858	689.238	93.8712	671.427	731.226	141.14	707.67	760.818	207.337	636.909	783.451	209.34	583.22	730.512	282.403	805.242	719.413	614.78	592.199	734.417	580.779	607.434	763.814	504.917	524.977	767.033	535.498	445.994	739.642	518.484
221	2.2	795.811	1115.1	340.047	851.434	1113.1	285.831	818.312	1108.43	411.439	904.345	968.099	240.828	882.793	982.893	491.763	839.464	928.593	357.533	878.873	689.236	93.8849	671.458	731.231	141.107	707.669	760.833	207.323	636.936	783.45	209.3	583.961	730.206	282.142	805.19	719.376	614.707	592.268	734.532	580.759	607.455	763.744	504.81	524.943	767.056	535.483	445.893	739.704	518.654
222	2.21	799.466	1114.07	339.109	851.513	1113.29	285.808	818.519	1108.65	411.433	904.367	968.12	240.79	882.777	982.901	491.737	839.345	928.65	357.489	878.862	689.227	93.9032	671.455	731.231	141.071	707.666	760.854	207.295	636.892	783.485	209.291	584.136	730.14	282.039	805.135	719.333	614.652	592.313	734.643	580.697	607.45	763.708	504.727	524.945	767.078	535.466	445.982	739.618	518.627
223	2.22	800.568	1114.08	338.927	851.671	1113.48	285.802	818.781	1108.89	411.448	904.403	968.145	240.77	882.779	982.914	491.726	839.348	928.68	357.468	878.898	689.217	93.9109	671.446	731.264	141.065	707.646	760.866	207.314	636.91	783.529	209.296	584.152	730.151	282.031	805.177	719.323	614.629	592.416	734.744	580.667	607.466	763.657	504.659	524.992	767.083	535.468	446.328	739.379	518.419
224	2.23	801.03	1114.35	338.921	851.833	1113.66	285.821	819.075	1109.12	411.47	904.445	968.139	240.763	882.816	982.915	491.733	839.379	928.681	357.465	878.938	689.217	93.9235	671.472	731.264	141.072	707.63	760.894	207.348	636.943	783.519	209.29	584.163	730.187	282.041	805.212	719.321	614.611	592.477	734.828	580.656	607.48	763.588	504.596	525.068	767.072	535.46	446.245	739.429	518.559
225	2.24	801.16	1114.72	338.969	851.957	1113.85	285.843	819.281	1109.38	411.488	904.446	968.117	240.75	882.808	982.909	491.721	839.326	928.733	357.451	878.947	689.213	93.9449	671.465	731.237	141.075	707.631	760.905	207.374	636.926	783.522	209.297	584.182	730.163	282.047	805.177	719.278	614.586	592.474	734.875	580.638	607.485	763.515	504.5	525.086	767.053	535.444	445.925	739.679	518.881
226	2.25	801.245	1115.1	339.037	852.138	1114.04	285.865	819.52	1109.65	411.51	904.452	968.079	240.743	882.798	982.888	491.688	839.359	928.726	357.416	878.937	689.174	93.9491	671.47	731.202	141.068	707.63	760.897	207.388	636.905	783.522	209.3	584.216	730.137	282.026	805.14	719.236	614.559	592.477	734.915	580.604	607.489	763.445	504.403	525.089	767.037	535.405	446.009	739.617	518.841
227	2.26	801.453	1115.55	339.126	852.392	1114.21	285.926	819.848	1109.93	411.554	904.458	968.074	240.763	882.824	982.873	491.673	839.456	928.671	357.408	878.932	689.145	93.95	671.477	731.211	141.09	707.636	760.857	207.403	636.927	783.482	209.29	584.214	730.114	282.024	805.128	719.208	614.542	592.523	734.979	580.581	607.517	763.35	504.307	525.153	767.058	535.372	446.197	739.488	518.725
228	2.27	801.798	1115.95	339.206	852.626	1114.41	285.98	820.174	1110.23	411.582	904.477	968.076	240.735	882.818	982.875	491.652	839.52	928.636	357.412	878.928	689.138	93.9391	671.511	731.218	141.085	707.682	760.83	207.382	636.933	783.442	209.29	584.226	730.104	282.005	805.106	719.2	614.543	592.157	735.128	580.696	607.52	763.259	504.208	525.173	767.07	535.354	446.105	739.599	518.839
229	2.28	802.178	1116.32	339.248	852.819	1114.61	286.051	820.444	1110.55	411.614	904.444	968.058	240.695	882.789	982.88	491.613	839.465	928.643	357.367	878.915	689.139	93.9391	671.522	731.217	141.064	707.688	760.804	207.327	636.922	783.403	209.284	582.495	730.879	282.479	805.087	719.219	614.539	591.595	735.305	580.824	607.447	763.176	504.077	525.186	767.075	535.311	446.197	739.528	518.774
230	2.29	802.647	1116.6	339.266	853.061	1114.82	286.115	820.746	1110.85	411.662	904.451	968.073	240.673	882.762	982.882	491.584	839.439	928.656	357.354	878.893	689.135	93.9305	671.487	731.224	141.027	707.632	760.777	207.324	636.954	783.394	209.236	580.442	731.785	283.075	805.094	719.252	614.529	592.271	735.262	580.544	607.383	763.143	503.978	525.193	767.114	535.283	446.078	739.656	518.943
231	2.3	803.123	1116.91	339.339	853.406	1115.02	286.154	821.081	1111.13	411.722	904.478	968.078	240.671	882.793	982.881	491.572	839.523	928.67	357.355	878.889	689.133	93.9157	671.528	731.238	141.027	707.641	760.793	207.323	636.964	783.416	209.243	583.324	730.502	282.254	805.139	719.274	614.527	592.458	735.329	580.464	607.411	763.118	503.906	525.238	767.174	535.318	446.421	739.441	518.798
232	2.31	803.46	1117.31	339.448	853.752	1115.22	286.18	821.41	1111.39	411.8	904.477	968.077	240.673	882.838	982.884	491.58	839.538	928.715	357.389	878.878	689.132	93.9121	671.553	731.246	141.038	707.656	760.827	207.326	636.937	783.453	209.269	582.298	730.992	282.52	805.138	719.28	614.524	592.515	735.366	580.454	607.426	763.114	503.89	525.249	767.213	535.469	446.598	739.43	519.001
233	2.32	803.679	1117.7	339.524	854.063	1115.44	286.182	821.673	1111.63	411.856	904.484	968.074	240.661	882.854	982.88	491.577	839.491	928.775	357.4	878.906	689.153	93.9268	671.522	731.253	141.029	707.653	760.859	207.32	636.927	783.488	209.254	580.36	731.885	283.07	805.148	719.267	614.502	592.521	735.36	580.472	607.424	763.153	503.952	525.196	767.242	535.663	446.53	739.578	519.492
234	2.33	803.957	1118.05	339.568	854.331	1115.69	286.214	821.931	1111.85	411.909	904.493	968.06	240.679	882.907	982.874	491.574	839.523	928.844	357.387	878.939	689.17	93.9201	671.501	731.223	141.054	707.664	760.884	207.317	636.957	783.527	209.23	583.208	730.645	282.25	805.138	719.23	614.454	592.575	735.353	580.5	607.419	763.196	504.014	525.164	767.264	535.778	446.131	739.828	520.089
235	2.34	804.264	1118.44	339.705	854.571	1115.91	286.28	822.233	1112.06	411.997	904.519	968.054	240.714	882.979	982.871	491.594	839.57	928.904	357.434	879.02	689.213	93.9283	671.524	731.224	141.064	707.66	760.924	207.365	636.963	783.557	209.268	583.887	730.345	282.097	805.162	719.206	614.425	592.249	735.459	580.682	607.458	763.24	504.071	525.191	767.266	535.816	446.067	739.906	520.286
236	2.35	804.605	1118.75	339.87	854.819	1116.13	286.341	822.591	1112.27	412.111	904.566	968.085	240.725	883.02	982.87	491.636	839.586	928.928	357.473	878.998	689.207	93.9623	671.531	731.237	141.075	707.605	760.94	207.409	636.906	783.571	209.307	584.05	730.232	282.076	805.197	719.206	614.412	591.754	735.578	580.901	607.464	763.236	504.09	525.215	767.251	535.842	446.032	739.934	520.261
237	2.36	804.949	1119.05	339.97	855.011	1116.31	286.388	822.92	1112.48	412.213	904.577	968.095	240.741	883.021	982.861	491.634	839.59	928.917	357.471	878.939	689.17	93.9742	671.495	731.258	141.046	707.577	760.916	207.393	636.889	783.525	209.302	584.151	730.17	282.03	805.152	719.19	614.378	592.414	735.472	580.634	607.445	763.198	504.049	525.212	767.246	535.826	446.007	739.919	520.227
238	2.37	805.302	1119.36	340.058	855.253	1116.47	286.408	823.265	1112.68	412.296	904.555	968.101	240.759	883.03	982.844	491.617	839.734	928.827	357.458	878.936	689.161	93.9257	671.467	731.252	141.057	707.638	760.84	207.328	636.92	783.459	209.272	584.22	730.105	281.987	805.152	719.19	614.372	592.565	735.463	580.532	607.435	763.14	503.991	525.158	767.238	535.769	446.016	739.906	520.214
239	2.38	805.543	1119.68	340.194	855.496	1116.63	286.467	823.659	1112.92	412.424	904.555	968.107	240.786	883.045	982.831	491.622	839.916	928.765	357.46	878.918	689.162	93.8986	671.514	731.233	141.061	707.669	760.8	207.316	636.971	783.417	209.232	582.583	730.832	282.486	805.154	719.199	614.383	592.625	735.479	580.496	607.392	763.081	503.945	525.149	767.229	535.728	446.029	739.899	520.154
240	2.39	805.622	1120.05	340.346	855.704	1116.83	286.55	823.991	1113.19	412.582	904.582	968.129	240.827	883.042	982.813	491.663	839.969	928.786	357.514	878.898	689.179	93.9141	671.489	731.226	141.078	707.662	760.785	207.33	636.92	783.419	209.243	580.382	731.82	283.13	805.119	719.21	614.394	592.648	735.533	580.509	607.334	763.063	503.916	525.116	767.224	535.719	446.193	739.788	519.959
241	2.4	805.731	1120.35	340.469	855.957	1117.07	286.621	824.303	1113.45	412.725	904.602	968.127	240.834	883.043	982.815	491.695	839.968	928.806	357.547	878.898	689.204	93.9287	671.456	731.233	141.087	707.65	760.793	207.325	636.883	783.419	209.261	583.237	730.523	282.272	805.04	719.192	614.393	592.63	735.554	580.53	607.277	763.082	503.889	525.081	767.23	535.707	446.394	739.628	519.734
242	2.41	805.869	1120.7	340.597	856.248	1117.31	286.685	824.647	1113.7	412.862	904.634	968.127	240.836	883.068	982.841	491.708	839.94	928.866	357.582	878.911	689.233	93.9493	671.435	731.229	141.082	707.671	760.815	207.327	636.925	783.446	209.267	583.967	730.201	282.078	805.045	719.214	614.398	592.606	735.546	580.533	607.307	763.108	503.877	525.013	767.211	535.672	446.058	739.839	519.987
243	2.42	806.106	1121.05	340.732	856.515	1117.56	286.764	824.957	1113.95	413.02	904.671	968.156	240.858	883.094	982.856	491.731	839.867	928.966	357.64	878.932	689.279	93.9715	671.412	731.221	141.096	707.642	760.865	207.386	636.917	783.508	209.29	584.121	730.179	282.053	805.067	719.227	614.406	592.573	735.561	580.51	607.323	763.139	503.893	525.014	767.179	535.629	445.952	739.893	520.006
244	2.43	804.611	1121.97	341.317	856.734	1117.78	286.854	825.239	1114.17	413.167	904.681	968.174	240.895	883.134	982.854	491.748	839.755	929.091	357.68	878.932	689.33	94.0075	671.443	731.217	141.092	707.609	760.925	207.4	636.863	783.566	209.341	584.036	730.247	282.061	805.056	719.23	614.426	592.605	735.595	580.509	607.308	763.167	503.913	525.051	767.144	535.605	445.902	739.91	519.98
245	2.44	801.07	1123.61	342.431	856.937	1117.97	286.917	825.535	1114.36	413.276	904.674	968.2	240.914	883.164	982.861	491.748	839.766	929.15	357.691	878.961	689.356	94.0203	671.463	731.252	141.095	707.581	760.948	207.392	636.857	783.588	209.348	584.026	730.256	282.068	805.052	719.24	614.431	592.615	735.584	580.508	607.324	763.169	503.916	525.064	767.118	535.567	445.935	739.923	519.948
246	2.45	800.442	1124.19	342.815	857.135	1118.09	286.991	825.842	1114.49	413.404	904.71	968.222	240.934	883.219	982.843	491.769	839.853	929.133	357.705	878.966	689.316	93.9907	671.469	731.27	141.112	707.6	760.927	207.375	636.862	783.547	209.33	584.098	730.209	282.071	805.07	719.256	614.435	592.63	735.555	580.505	607.365	763.101	503.906	525.114	767.07	535.509	445.947	739.921	519.93
247	2.46	800.427	1124.51	343.058	857.351	1118.17	287.087	826.115	1114.6	413.535	904.742	968.218	240.975	883.267	982.816	491.795	839.992	929.054	357.729	878.926	689.277	93.9737	671.483	731.28	141.111	707.645	760.869	207.371	636.905	783.488	209.317	582.437	730.935	282.594	805.112	719.274	614.481	592.617	735.542	580.512	607.386	763.016	503.92	525.11	767.013	535.487	445.906	739.915	519.913
248	2.47	800.4	1124.8	343.268	857.591	1118.25	287.168	826.371	1114.71	413.638	904.739	968.195	241.024	883.293	982.805	491.8	840.147	928.964	357.746	878.922	689.273	93.9464	671.485	731.278	141.118	707.643	760.81	207.344	636.927	783.438	209.291	580.233	731.897	283.257	805.132	719.293	614.524	592.214	735.618	580.688	607.414	762.957	503.902	525.093	766.949	535.46	445.899	739.912	519.861
249	2.48	802.184	1124.37	342.943	857.768	1118.33	287.234	826.583	1114.83	413.728	904.734	968.178	241.052	883.314	982.79	491.805	840.191	928.959	357.769	878.955	689.29	93.9426	671.492	731.26	141.126	707.673	760.777	207.325	636.899	783.407	209.29	583.265	730.502	282.36	805.095	719.291	614.537	591.67	735.708	580.865	607.421	762.95	503.879	525.16	766.881	535.391	446.116	739.758	519.643
250	2.49	806.376	1123.06	341.969	857.915	1118.42	287.331	826.756	1114.97	413.833	904.774	968.181	241.09	883.362	982.803	491.838	840.18	929.037	357.816	878.946	689.314	93.9624	671.488	731.257	141.154	707.676	760.812	207.353	636.901	783.445	209.304	584.007	730.16	282.164	805.065	719.313	614.579	592.327	735.555	580.598	607.413	762.96	503.88	525.186	766.833	535.318	446.32	739.605	519.392
251	2.5	807.504	1122.89	341.823	858.064	1118.54	287.443	826.904	1115.1	413.939	904.803	968.205	241.116	883.403	982.825	491.885	840.179	929.128	357.905	878.926	689.357	93.9817	671.472	731.255	141.14	707.647	760.85	207.378	636.893	783.473	209.349	584.143	730.113	282.135	805.078	719.384	614.636	592.452	735.532	580.54	607.399	762.994	503.906	525.138	766.828	535.267	446.002	739.838	519.613
252	2.51	807.853	1123.03	341.866	858.18	1118.65	287.56	827.05	1115.22	414.005	904.81	968.232	241.143	883.445	982.852	491.92	840.136	929.233	357.977	878.947	689.409	93.9727	671.469	731.265	141.142	707.613	760.891	207.393	636.863	783.509	209.378	584.138	730.143	282.142	805.095	719.435	614.661	592.479	735.56	580.548	607.415	763.044	503.923	525.13	766.798	535.219	446.125	739.779	519.483
253	2.52	808.05	1123.23	341.967	858.277	1118.76	287.656	827.201	1115.31	414.06	904.832	968.245	241.152	883.483	982.865	491.942	840.12	929.313	358.018	878.963	689.432	93.988	671.456	731.272	141.122	707.577	760.927	207.387	636.849	783.529	209.385	584.076	730.169	282.164	805.104	719.477	614.68	592.506	735.553	580.561	607.37	763.071	503.94	525.122	766.763	535.145	446.505	739.554	519.141
254	2.53	808.178	1123.42	342.077	858.391	1118.87	287.751	827.344	1115.37	414.123	904.877	968.245	241.161	883.511	982.865	491.95	840.107	929.345	358.044	878.947	689.434	93.9888	671.446	731.26	141.126	707.571	760.912	207.36	636.842	783.517	209.377	584.079	730.178	282.151	805.101	719.509	614.711	592.53	735.521	580.557	607.32	763.055	503.96	525.122	766.707	535.116	446.587	739.489	519.011
255	2.54	808.36	1123.55	342.168	858.546	1118.95	287.849	827.503	1115.42	414.186	904.905	968.247	241.18	883.589	982.876	491.967	840.244	929.327	358.079	878.939	689.434	93.9774	671.44	731.266	141.131	707.586	760.885	207.345	636.838	783.489	209.354	584.137	730.147	282.151	805.099	719.54	614.74	592.525	735.509	580.563	607.353	763.024	503.985	525.122	766.695	535.098	446.581	739.466	518.948
256	2.55	808.56	1123.63	342.281	858.674	1119.02	287.947	827.674	1115.47	414.25	904.909	968.262	241.202	883.652	982.883	491.976	840.301	929.34	358.098	878.925	689.434	93.9687	671.44	731.268	141.097	707.636	760.865	207.296	636.845	783.475	209.333	584.272	730.085	282.107	805.104	719.543	614.737	592.504	735.48	580.572	607.343	763.002	503.991	525.105	766.655	535.088	446.419	739.548	519.037
257	2.56	808.696	1123.73	342.395	858.739	1119.08	288.058	827.827	1115.53	414.316	904.912	968.256	241.211	883.691	982.881	491.986	840.26	929.382	358.121	878.906	689.424	93.9736	671.444	731.271	141.114	707.622	760.856	207.318	636.86	783.46	209.325	582.361	730.895	282.613	805.082	719.548	614.737	592.478	735.44	580.569	607.304	762.994	504.002	525.231	766.468	534.953	446.225	739.68	519.199
258	2.57	808.839	1123.83	342.52	858.855	1119.15	288.136	827.984	1115.58	414.392	904.942	968.239	241.239	883.737	982.88	492.005	840.35	929.39	358.152	878.875	689.403	93.9938	671.461	731.265	141.144	707.593	760.848	207.364	636.857	783.469	209.326	580.077	731.909	283.287	805.093	719.575	614.763	592.094	735.496	580.741	607.335	762.981	504.041	525.418	766.26	534.788	446.507	739.461	518.94
259	2.58	809.006	1123.91	342.647	858.97	1119.23	288.202	828.187	1115.65	414.464	904.972	968.261	241.244	883.805	982.887	492.027	840.457	929.381	358.154	878.894	689.434	93.9841	671.503	731.271	141.123	707.614	760.841	207.374	636.853	783.459	209.321	583.156	730.585	282.395	805.139	719.638	614.789	591.578	735.587	580.969	607.37	762.967	504.041	525.21	766.434	534.944	446.558	739.406	518.845
260	2.59	809.113	1124.02	342.775	859.025	1119.31	288.293	828.372	1115.71	414.543	904.977	968.296	241.24	883.849	982.897	492.034	840.478	929.415	358.147	878.94	689.492	93.9843	671.49	731.283	141.114	707.584	760.879	207.375	636.854	783.47	209.309	583.859	730.288	282.182	805.143	719.69	614.782	592.242	735.409	580.668	607.351	763.012	504.056	525.111	766.472	534.947	446.535	739.416	518.786
261	2.6	809.178	1124.17	342.9	859.069	1119.37	288.378	828.528	1115.78	414.627	904.975	968.305	241.259	883.874	982.915	492.05	840.438	929.479	358.197	878.926	689.537	94.0072	671.438	731.275	141.121	707.52	760.902	207.397	636.789	783.509	209.324	584.015	730.19	282.146	805.105	719.712	614.788	592.385	735.351	580.588	607.315	763.059	504.071	525.054	766.486	534.928	446.508	739.449	518.746
262	2.61	809.381	1124.26	343.008	859.133	1119.42	288.449	828.716	1115.84	414.73	904.988	968.315	241.296	883.934	982.939	492.083	840.452	929.514	358.249	878.881	689.561	94.0061	671.414	731.283	141.146	707.508	760.893	207.423	636.766	783.533	209.346	584.103	730.17	282.151	805.087	719.755	614.829	592.395	735.336	580.588	607.296	763.077	504.095	525.013	766.496	534.92	446.502	739.446	518.71
263	2.62	809.464	1124.33	343.077	859.237	1119.45	288.473	828.913	1115.89	414.803	905.036	968.332	241.309	883.97	982.95	492.095	840.521	929.535	358.262	878.881	689.589	94.0103	671.441	731.303	141.159	707.553	760.9	207.396	636.824	783.522	209.33	584.157	730.141	282.146	805.094	719.79	614.85	592.416	735.331	580.601	607.327	763.078	504.111	525.116	766.365	534.776	446.495	739.467	518.684
264	2.63	809.555	1124.37	343.151	859.302	1119.49	288.505	829.06	1115.93	414.86	905.043	968.346	241.326	883.982	982.95	492.093	840.566	929.535	358.252	878.914	689.628	94.0111	671.393	731.298	141.153	707.568	760.907	207.39	636.807	783.491	209.334	584.089	730.152	282.133	805.083	719.788	614.842	591.988	735.424	580.769	607.313	763.072	504.109	525.219	766.196	534.585	446.498	739.461	518.663
265	2.64	809.626	1124.43	343.205	859.351	1119.51	288.557	829.195	1115.96	414.935	905.06	968.353	241.329	884.012	982.944	492.111	840.536	929.57	358.269	878.917	689.652	94.0394	671.375	731.321	141.147	707.559	760.918	207.395	636.718	783.512	209.371	584.13	730.128	282.11	805.108	719.803	614.843	591.061	735.605	581.123	607.341	763.073	504.129	525	766.405	534.777	446.334	739.591	518.781
266	2.65	809.821	1124.44	343.232	859.39	1119.52	288.594	829.35	1115.99	415.001	905.092	968.366	241.342	884.085	982.941	492.131	840.544	929.569	358.289	878.907	689.663	94.0357	671.374	731.327	141.168	707.548	760.947	207.403	636.731	783.524	209.363	584.209	730.116	282.108	805.127	719.809	614.833	591.218	735.506	581.035	607.373	763.069	504.162	524.965	766.427	534.826	446.017	739.834	519.088
267	2.66	809.921	1124.44	343.273	859.43	1119.54	288.601	829.47	1116.01	415.034	905.138	968.375	241.344	884.164	982.936	492.144	840.576	929.541	358.303	878.897	689.658	94.0188	671.403	731.314	141.169	707.519	760.939	207.396	636.764	783.5	209.343	584.119	730.159	282.128	805.131	719.804	614.82	591.665	735.397	580.869	607.366	763.037	504.182	524.983	766.419	534.829	445.934	739.895	519.16
268	2.67	809.935	1124.5	343.304	859.506	1119.54	288.613	829.6	1116.02	415.062	905.145	968.389	241.344	884.192	982.929	492.152	840.539	929.59	358.326	878.916	689.653	94.0324	671.371	731.313	141.144	707.538	760.922	207.373	636.755	783.48	209.346	584.079	730.153	282.136	805.167	719.79	614.818	590.913	735.526	581.125	607.358	763.021	504.2	524.994	766.414	534.839	445.895	739.933	519.168
269	2.68	809.932	1124.55	343.374	859.573	1119.53	288.659	829.725	1116.03	415.129	905.179	968.38	241.368	884.247	982.927	492.181	840.512	929.663	358.356	878.94	689.677	94.0623	671.412	731.285	141.147	707.537	760.937	207.382	636.732	783.492	209.365	584.041	730.171	282.157	805.194	719.77	614.797	590.739	735.533	581.219	607.4	763.007	504.243	524.344	766.639	534.982	445.881	739.912	519.19
270	2.69	809.932	1124.61	343.458	859.685	1119.53	288.691	829.835	1116.04	415.209	905.237	968.396	241.414	884.341	982.932	492.244	840.531	929.698	358.401	878.943	689.725	94.0735	671.469	731.275	141.14	707.536	760.937	207.433	636.728	783.502	209.389	584.116	730.129	282.17	805.205	719.784	614.82	591.137	735.439	581.116	607.449	763.02	504.287	523.573	766.955	535.154	445.94	739.898	519.206
271	2.7	810.024	1124.58	343.482	859.751	1119.54	288.728	829.92	1116.04	415.25	905.299	968.427	241.454	884.413	982.937	492.275	840.63	929.664	358.43	878.911	689.763	94.0696	671.385	731.308	141.173	707.522	760.941	207.462	636.709	783.486	209.39	584.068	730.12	282.153	805.205	719.794	614.83	592.128	735.233	580.804	607.429	763.016	504.306	524.683	766.57	534.939	446.129	739.784	519.095
272	2.71	810.175	1124.49	343.502	859.791	1119.53	288.765	829.973	1116.03	415.278	905.336	968.439	241.483	884.451	982.942	492.306	840.666	929.653	358.452	878.886	689.817	94.0376	671.394	731.305	141.172	707.51	760.931	207.44	636.686	783.479	209.386	584.075	730.112	282.167	805.181	719.788	614.822	591.94	735.277	580.882	607.377	763.001	504.305	524.892	766.486	534.883	446.296	739.644	518.958
273	2.72	810.279	1124.49	343.568	859.824	1119.55	288.812	830.042	1116.03	415.354	905.393	968.476	241.525	884.525	982.95	492.369	840.679	929.677	358.5	878.898	689.919	94.0518	671.39	731.298	141.205	707.507	760.919	207.424	636.691	783.482	209.393	584.062	730.121	282.215	805.162	719.783	614.807	591.465	735.356	581.079	607.331	763.003	504.33	524.91	766.484	534.911	446.014	739.855	519.228
274	2.73	810.304	1124.49	343.668	859.872	1119.55	288.891	830.111	1116.03	415.439	905.418	968.522	241.562	884.584	982.944	492.419	840.648	929.705	358.562	878.888	690.011	94.0598	671.383	731.312	141.24	707.502	760.907	207.433	636.641	783.468	209.431	584.028	730.106	282.265	805.151	719.785	614.789	592.123	735.194	580.812	607.317	763.031	504.36	524.898	766.507	534.949	445.937	739.921	519.317
275	2.74	810.304	1124.47	343.731	859.914	1119.55	288.955	830.164	1116.03	415.509	905.443	968.578	241.589	884.626	982.931	492.47	840.666	929.723	358.588	878.878	690.088	94.0589	671.367	731.32	141.226	707.481	760.934	207.453	636.606	783.453	209.423	583.982	730.128	282.271	805.13	719.77	614.794	591.859	735.224	580.874	607.305	763.069	504.37	524.989	766.371	534.817	446.065	739.806	519.184
276	2.75	810.413	1124.44	343.814	859.975	1119.58	289.022	830.261	1116.04	415.61	905.524	968.652	241.623	884.7	982.937	492.526	840.621	929.804	358.619	878.887	690.17	94.0803	671.397	731.318	141.181	707.444	760.955	207.46	636.603	783.485	209.402	583.927	730.133	282.235	805.117	719.731	614.78	590.883	735.376	581.222	607.308	763.064	504.382	525.284	766.098	534.555	446.416	739.543	518.883
277	2.76	810.484	1124.46	343.933	860.084	1119.63	289.145	830.383	1116.05	415.769	905.613	968.726	241.682	884.809	982.935	492.605	840.596	929.913	358.698	878.912	690.263	94.0949	671.395	731.325	141.191	707.436	761	207.484	636.592	783.506	209.422	583.888	730.155	282.281	805.135	719.711	614.756	590.633	735.43	581.346	607.354	763.088	504.437	525.226	766.179	534.632	446.533	739.49	518.835
278	2.77	810.568	1124.48	344.099	860.15	1119.68	289.317	830.501	1116.04	415.949	905.693	968.806	241.756	884.907	982.914	492.687	840.587	929.973	358.79	878.946	690.355	94.1175	671.347	731.36	141.234	707.359	761.034	207.52	636.541	783.531	209.467	583.852	730.187	282.314	805.151	719.687	614.733	591.013	735.384	581.241	607.389	763.132	504.5	524.971	766.443	534.925	446.405	739.619	518.983
279	2.78	810.623	1124.47	344.273	860.18	1119.74	289.499	830.63	1116.01	416.118	905.728	968.877	241.813	884.987	982.877	492.76	840.572	930.021	358.85	878.988	690.469	94.1196	671.301	731.384	141.265	707.335	761.039	207.497	636.488	783.52	209.456	583.901	730.186	282.28	805.166	719.636	614.709	591.57	735.271	581.053	607.401	763.122	504.516	524.928	766.516	535.003	446.02	739.869	519.277
280	2.79	810.735	1124.45	344.447	860.284	1119.84	289.697	830.794	1115.97	416.307	905.801	968.951	241.853	885.103	982.839	492.83	840.66	930.044	358.873	879.051	690.613	94.1008	671.299	731.394	141.25	707.337	761.047	207.466	636.447	783.501	209.435	582.004	731.024	282.831	805.157	719.568	614.669	590.929	735.423	581.331	607.434	763.128	504.499	524.881	766.537	534.997	445.931	739.944	519.331
281	2.8	810.954	1124.41	344.647	860.44	1119.96	289.916	830.944	1115.92	416.529	905.928	969.027	241.935	885.245	982.801	492.906	840.681	930.078	358.954	879.101	690.772	94.067	671.317	731.394	141.249	707.298	761.091	207.475	636.437	783.495	209.435	577.694	732.925	284.08	805.156	719.52	614.634	590.828	735.503	581.432	607.416	763.12	504.504	524.87	766.569	535.033	445.929	739.943	519.338
282	2.81	811.066	1124.4	344.912	860.583	1120.04	290.166	831.025	1115.88	416.752	906.01	969.099	242.043	885.357	982.738	492.991	840.664	930.11	359.072	879.14	690.938	94.0542	671.341	731.394	141.273	707.252	761.116	207.51	636.386	783.503	209.468	578.566	732.516	283.83	805.106	719.448	614.588	591.111	735.407	581.293	607.399	763.127	504.557	524.834	766.589	535.082	445.899	739.946	519.396
283	2.82	811.233	1124.38	345.205	860.718	1120.13	290.467	831.119	1115.81	416.978	906.091	969.159	242.137	885.511	982.678	493.082	840.767	930.108	359.145	879.184	691.114	94.0024	671.328	731.356	141.3	707.284	761.108	207.457	636.406	783.465	209.438	580.639	731.577	283.227	805.03	719.367	614.531	591.615	735.294	581.096	607.39	763.127	504.574	524.787	766.6	535.104	445.899	739.929	519.428
284	2.83	811.467	1124.37	345.496	860.854	1120.26	290.77	831.256	1115.73	417.219	906.21	969.25	242.201	885.699	982.608	493.177	840.961	930.106	359.196	879.237	691.308	93.9185	671.297	731.331	141.3	707.281	761.112	207.422	636.445	783.426	209.404	579.221	732.18	283.666	805.024	719.333	614.463	590.805	735.437	581.391	607.4	763.128	504.574	524.947	766.46	534.979	446.066	739.796	519.288
285	2.84	809.739	1125.08	346.318	861.07	1120.39	291.062	831.411	1115.66	417.521	906.342	969.357	242.298	885.911	982.548	493.285	841.06	930.139	359.305	879.319	691.541	93.8815	671.26	731.315	141.309	707.287	761.113	207.408	636.466	783.419	209.376	580.813	731.434	283.219	805.008	719.282	614.403	591.089	735.384	581.321	607.372	763.135	504.579	525.141	766.312	534.848	446.276	739.641	519.116
286	2.85	805.512	1126.69	347.842	861.284	1120.53	291.386	831.602	1115.63	417.862	906.465	969.471	242.379	886.114	982.504	493.409	841.056	930.223	359.405	879.369	691.786	93.863	671.263	731.326	141.29	707.247	761.173	207.445	636.397	783.46	209.394	579.251	732.164	283.669	805.003	719.228	614.355	592.073	735.223	580.997	607.393	763.165	504.615	524.891	766.542	535.095	446.148	739.75	519.225
287	2.86	804.58	1127.13	348.511	861.472	1120.69	291.69	831.863	1115.59	418.19	906.581	969.606	242.427	886.319	982.454	493.526	841.12	930.297	359.485	879.469	692.051	93.8203	671.296	731.333	141.262	707.126	761.253	207.488	636.322	783.512	209.412	582.737	730.656	282.66	805.031	719.185	614.301	591.897	735.266	581.071	607.404	763.223	504.658	525.02	766.477	535.035	446.3	739.674	519.109
288	2.87	804.655	1127.27	348.89	861.675	1120.82	291.964	832.18	1115.56	418.52	906.755	969.745	242.494	886.557	982.409	493.654	841.268	930.364	359.557	879.541	692.294	93.7753	671.277	731.321	141.251	707.103	761.311	207.47	636.325	783.525	209.404	583.6	730.289	282.384	805.058	719.162	614.237	591.429	735.367	581.23	607.433	763.23	504.681	525.209	766.341	534.889	446.193	739.757	519.22
289	2.88	804.831	1127.37	349.277	861.889	1120.9	292.3	832.516	1115.54	418.881	906.958	969.902	242.588	886.792	982.374	493.814	841.419	930.422	359.654	879.557	692.503	93.7208	671.262	731.319	141.245	707.108	761.376	207.447	636.348	783.516	209.38	581.836	731.057	282.887	805.049	719.108	614.183	592.243	735.202	580.966	607.471	763.236	504.702	524.952	766.559	535.113	446.344	739.673	519.145
290	2.89	806.995	1126.75	349.141	862.163	1120.96	292.648	832.836	1115.5	419.266	907.097	970.052	242.692	887.04	982.322	493.975	841.53	930.491	359.784	879.556	692.72	93.6857	671.297	731.298	141.211	707.063	761.385	207.443	636.334	783.481	209.347	579.415	732.101	283.587	805.046	719.07	614.147	592.468	735.165	580.914	607.477	763.217	504.709	524.916	766.615	535.173	446.198	739.736	519.264
291	2.9	811.738	1125.21	348.313	862.535	1121.05	292.969	833.198	1115.46	419.667	907.299	970.228	242.804	887.227	982.26	494.11	841.686	930.53	359.882	879.522	692.942	93.6413	671.3	731.293	141.203	707.048	761.399	207.404	636.336	783.447	209.299	582.727	730.631	282.61	805.026	719.052	614.123	592.148	735.288	581.068	607.497	763.177	504.684	524.915	766.635	535.178	446.503	739.516	519.009
292	2.91	813.177	1124.82	348.369	862.874	1121.16	293.311	833.528	1115.42	420.078	907.551	970.45	242.926	887.365	982.215	494.238	841.868	930.576	360.002	879.47	693.194	93.585	671.319	731.27	141.205	707.028	761.446	207.371	636.319	783.435	209.263	583.572	730.236	282.347	804.997	719.042	614.115	591.198	735.528	581.45	607.465	763.155	504.67	524.886	766.645	535.17	446.424	739.579	519.106
293	2.92	813.794	1124.76	348.735	863.17	1121.25	293.718	833.782	1115.42	420.48	907.777	970.664	243.077	887.534	982.174	494.405	841.911	930.714	360.165	879.407	693.44	93.5401	671.345	731.272	141.225	706.881	761.507	207.44	636.235	783.442	209.256	581.787	731.006	282.857	804.955	719.04	614.116	590.858	735.552	581.524	607.42	763.167	504.682	524.807	766.677	535.174	446.064	739.837	519.392
294	2.93	814.168	1124.85	349.15	863.459	1121.37	294.136	834.031	1115.44	420.861	907.968	970.862	243.234	887.766	982.148	494.615	841.981	930.854	360.366	879.383	693.718	93.5166	671.262	731.304	141.293	706.798	761.596	207.454	636.168	783.459	209.258	579.365	732.07	283.552	804.929	719.045	614.153	590.806	735.582	581.52	607.398	763.172	504.689	524.706	766.695	535.174	446.137	739.779	519.332
295	2.94	814.482	1124.95	349.547	863.751	1121.51	294.536	834.366	1115.47	421.263	908.182	971.08	243.37	888.052	982.119	494.83	842.118	931.021	360.556	879.352	694.018	93.5137	671.235	731.302	141.321	706.712	761.683	207.506	636.138	783.468	209.232	582.643	730.6	282.588	804.928	719.074	614.204	590.642	735.528	581.487	607.387	763.189	504.68	524.701	766.712	535.155	446.334	739.668	519.232
296	2.95	814.897	1125.03	349.955	864.079	1121.65	294.933	834.785	1115.5	421.703	908.47	971.317	243.495	888.315	982.099	495.03	842.279	931.199	360.709	879.334	694.307	93.5326	671.276	731.29	141.317	706.626	761.764	207.51	636.115	783.493	209.19	583.508	730.228	282.326	804.876	719.076	614.238	590.726	735.556	581.488	607.383	763.23	504.677	524.708	766.738	535.145	446.046	739.875	519.515
297	2.96	815.432	1125.11	350.388	864.451	1121.82	295.354	835.273	1115.53	422.151	908.777	971.544	243.7	888.625	982.091	495.267	842.459	931.358	360.86	879.378	694.583	93.5697	671.333	731.257	141.314	706.61	761.844	207.516	636.092	783.524	209.166	583.736	730.121	282.236	804.85	719.079	614.251	591.218	735.518	581.334	607.401	763.246	504.696	524.713	766.743	535.141	445.97	739.914	519.601
298	2.97	815.938	1125.23	350.848	864.824	1122.04	295.899	835.787	1115.59	422.592	909.004	971.749	243.976	888.976	982.097	495.525	842.663	931.524	361.035	879.511	694.872	93.6375	671.331	731.243	141.349	706.52	761.948	207.58	636.042	783.551	209.16	581.931	730.929	282.764	804.811	719.075	614.26	591.739	735.381	581.129	607.395	763.235	504.686	524.743	766.721	535.11	445.975	739.913	519.607
299	2.98	816.27	1125.45	351.294	865.245	1122.27	296.432	836.231	1115.64	422.992	909.256	971.951	244.263	889.277	982.096	495.764	842.851	931.696	361.222	879.719	695.207	93.7729	671.364	731.225	141.354	706.365	762.063	207.657	635.967	783.581	209.154	579.558	731.984	283.432	804.768	719.045	614.269	591.505	735.472	581.251	607.4	763.266	504.692	524.768	766.709	535.085	445.981	739.915	519.605
300	2.99	816.648	1125.61	351.711	865.756	1122.44	296.883	836.642	1115.68	423.343	909.549	972.131	244.52	889.532	982.076	495.968	843.076	931.832	361.355	879.945	695.55	93.9185	671.447	731.19	141.362	706.25	762.171	207.676	635.931	783.584	209.141	580.828	731.402	283.038	804.732	719.028	614.27	592.154	735.233	580.901	607.412	763.254	504.695	524.758	766.695	535.071	446.147	739.829	519.485
301	3	817.065	1125.69	352.105	866.26	1122.58	297.317	837.037	1115.72	423.675	910.134	972.392	244.596	889.826	982.043	496.189	843.386	931.933	361.514	880.17	695.873	94.0416	671.57	731.106	141.396	706.22	762.249	207.629	635.964	783.558	209.095	579.332	732.039	283.455	804.738	719.031	614.261	592.34	735.161	580.811	607.421	763.215	504.657	524.786	766.679	535.062	446.384	739.703	519.318
302	3.01	817.56	1125.75	352.522	866.763	1122.7	297.728	837.423	1115.75	424.031	910.739	972.667	244.648	890.149	981.977	496.411	843.728	932.025	361.695	880.356	696.183	94.171	671.688	731.054	141.406	706.192	762.276	207.616	635.994	783.548	209.073	580.872	731.386	283.014	804.74	719.026	614.248	592.415	735.136	580.772	607.43	763.154	504.614	524.831	766.689	535.027	446.282	739.744	519.407
303	3.02	818.13	1125.81	352.988	867.233	1122.84	298.142	837.856	1115.76	424.445	910.858	972.774	245.028	890.41	981.914	496.616	843.936	932.157	361.841	880.48	696.458	94.2844	671.752	731.032	141.442	706.166	762.294	207.614	636.04	783.517	209.016	577.703	732.809	283.906	804.707	719.017	614.25	592.018	735.216	580.897	607.418	763.101	504.59	524.827	766.685	535.003	446.555	739.511	519.112
304	3.03	818.657	1125.92	353.477	867.792	1122.98	298.576	838.395	1115.76	424.907	911.594	973.094	244.886	890.676	981.877	496.798	844.132	932.315	362.003	880.602	696.754	94.3944	671.85	730.985	141.458	706.157	762.317	207.645	636.124	783.476	208.952	576.977	733.118	284.055	804.69	719.016	614.26	591.012	735.412	581.224	607.401	763.068	504.53	524.931	766.534	534.837	446.477	739.546	519.145
305	3.04	819.12	1126.06	353.947	868.364	1123.15	299.015	838.999	1115.8	425.422	912.024	973.299	244.959	890.944	981.874	496.982	844.273	932.529	362.183	880.704	697.107	94.4981	671.949	730.977	141.486	706.157	762.36	207.664	636.183	783.477	208.928	576.778	733.217	284.1	804.678	719.029	614.243	590.767	735.476	581.305	607.403	763.117	504.507	525.104	766.367	534.646	446.313	739.708	519.299
306	3.05	819.552	1126.26	354.447	868.884	1123.33	299.506	839.559	1115.87	426.012	912.317	973.499	245.118	891.19	981.891	497.187	844.333	932.798	362.406	880.755	697.457	94.6051	672.029	730.946	141.528	706.107	762.443	207.726	636.099	783.561	209	578.498	732.486	283.596	804.672	719.041	614.248	590.72	735.495	581.312	607.391	763.212	504.542	524.893	766.641	534.847	446.417	739.622	519.195
307	3.06	819.92	1126.49	354.933	869.211	1123.53	300.061	840.001	1115.93	426.56	912.607	973.679	245.294	891.457	981.912	497.384	844.263	933.101	362.661	880.801	697.791	94.6874	672.106	730.917	141.548	705.989	762.558	207.853	635.943	783.637	209.11	582.336	730.795	282.47	804.629	719.035	614.273	591.143	735.411	581.158	607.337	763.292	504.583	524.826	766.714	534.907	446.098	739.834	519.424
308	3.07	820.385	1126.68	355.402	869.632	1123.71	300.539	840.43	1115.95	426.987	912.907	973.865	245.474	891.74	981.9	497.579	844.355	933.305	362.855	880.87	698.123	94.711	672.138	730.917	141.61	705.96	762.616	207.926	635.924	783.662	209.123	583.304	730.36	282.177	804.581	719.013	614.289	591.69	735.291	580.96	607.338	763.291	504.583	524.795	766.724	534.928	446.027	739.881	519.464
309	3.08	821.074	1126.75	355.836	870.112	1123.83	300.966	840.888	1115.96	427.327	913.181	974.089	245.647	892.056	981.838	497.771	844.682	933.398	362.981	880.932	698.416	94.674	672.219	730.908	141.648	705.995	762.607	207.915	636.05	783.614	209.045	581.917	730.938	282.582	804.566	718.999	614.312	591.013	735.419	581.197	607.368	763.247	504.565	524.79	766.711	534.919	446.038	739.9	519.476
310	3.09	821.688	1126.81	356.328	870.577	1123.94	301.414	841.339	1115.94	427.699	913.49	974.318	245.841	892.405	981.763	497.964	844.997	933.473	363.127	880.994	698.692	94.6331	672.223	730.896	141.688	705.996	762.605	207.923	636.113	783.548	209.014	578.136	732.589	283.686	804.556	719.011	614.337	590.805	735.437	581.235	607.402	763.18	504.54	524.826	766.708	534.895	446.019	739.912	519.502
311	3.1	822.048	1126.86	356.801	870.998	1124.05	301.866	841.838	1115.89	428.159	913.752	974.529	246.047	892.704	981.692	498.167	845.26	933.571	363.29	881.043	698.973	94.6047	672.274	730.872	141.729	705.978	762.629	207.96	636.105	783.522	209.005	577.218	732.995	283.917	804.517	719.011	614.36	591.176	735.37	581.084	607.38	763.119	504.524	524.788	766.702	534.889	446.193	739.777	519.36
312	3.11	822.503	1126.89	357.206	871.481	1124.19	302.268	842.38	1115.86	428.633	913.997	974.731	246.233	893	981.62	498.345	845.521	933.643	363.44	881.1	699.247	94.5625	672.343	730.864	141.787	705.947	762.682	207.982	636.135	783.514	208.967	576.983	733.071	283.965	804.499	719.006	614.386	591.71	735.267	580.888	607.39	763.084	504.493	524.784	766.671	534.881	446.555	739.488	519.011
313	3.12	823.081	1126.95	357.639	872.005	1124.42	302.674	842.94	1115.85	429.142	914.266	974.906	246.414	893.362	981.576	498.521	845.93	933.731	363.586	881.225	699.584	94.5076	672.43	730.842	141.835	705.954	762.755	207.964	636.165	783.539	208.949	576.927	733.117	283.965	804.515	719.036	614.405	590.984	735.417	581.154	607.429	763.091	504.48	524.94	766.535	534.754	446.612	739.446	518.913
314	3.13	823.563	1127.1	358.125	872.397	1124.64	303.12	843.429	1115.86	429.68	914.5	975.071	246.599	893.68	981.562	498.717	846.135	933.869	363.786	881.43	699.983	94.4753	672.463	730.815	141.877	705.913	762.848	208.01	636.081	783.621	209.021	578.549	732.407	283.486	804.515	719.089	614.414	591.201	735.383	581.056	607.386	763.131	504.508	525.238	766.284	534.481	446.465	739.554	519.043
315	3.14	823.917	1127.34	358.592	872.714	1124.85	303.509	843.832	1115.91	430.158	914.714	975.223	246.775	893.977	981.553	498.916	846.345	934.026	363.973	881.598	700.341	94.4424	672.45	730.819	141.962	705.851	762.956	208.086	635.992	783.705	209.095	582.325	730.704	282.376	804.485	719.098	614.436	592.065	735.21	580.736	607.388	763.194	504.517	525.134	766.347	534.505	446.095	739.822	519.361
316	3.15	824.206	1127.56	359.027	873.127	1124.97	303.909	844.248	1115.93	430.572	914.975	975.392	246.992	894.324	981.542	499.082	846.606	934.147	364.114	881.753	700.693	94.3928	672.528	730.804	142.006	705.862	763.074	208.124	636.053	783.734	209.102	583.298	730.313	282.089	804.464	719.12	614.462	592.285	735.173	580.664	607.402	763.222	504.513	524.832	766.603	534.714	446.019	739.873	519.434
317	3.16	824.599	1127.61	359.425	873.535	1125.08	304.389	844.636	1115.94	430.944	915.238	975.585	247.251	894.637	981.514	499.25	846.899	934.229	364.27	881.856	701.011	94.3362	672.656	730.767	142.03	705.906	763.132	208.117	636.122	783.777	209.104	583.567	730.235	282.012	804.45	719.153	614.49	592.34	735.152	580.655	607.376	763.253	504.497	524.763	766.658	534.747	446.017	739.879	519.45
318	3.17	824.905	1127.68	359.86	873.915	1125.2	304.892	844.969	1115.95	431.281	915.551	975.777	247.512	894.973	981.477	499.449	847.079	934.377	364.475	881.914	701.368	94.2779	672.732	730.718	142.127	705.852	763.181	208.216	636.09	783.797	209.168	583.668	730.177	281.997	804.412	719.17	614.496	592.353	735.152	580.644	607.358	763.258	504.508	524.765	766.664	534.741	446.009	739.882	519.456
319	3.18	825.332	1127.72	360.281	874.296	1125.3	305.344	845.369	1115.95	431.61	915.918	975.977	247.784	895.3	981.421	499.655	847.284	934.512	364.672	881.958	701.794	94.1849	672.78	730.659	142.298	705.866	763.215	208.284	636.078	783.818	209.209	581.913	730.906	282.509	804.355	719.154	614.509	592.338	735.143	580.616	607.317	763.208	504.494	524.764	766.665	534.743	445.984	739.881	519.481
320	3.19	825.795	1127.73	360.681	874.755	1125.35	305.708	845.822	1115.93	431.939	916.22	976.179	248.031	895.621	981.364	499.839	847.571	934.589	364.832	881.971	702.233	94.0765	672.744	730.634	142.464	705.889	763.273	208.361	636.154	783.793	209.203	578.013	732.622	283.635	804.333	719.174	614.523	592.331	735.132	580.619	607.331	763.142	504.469	524.734	766.672	534.747	445.948	739.88	519.52
321	3.2	826.233	1127.73	361.073	875.202	1125.42	306.05	846.294	1115.89	432.3	916.516	976.384	248.204	895.91	981.313	500.015	847.796	934.71	364.989	881.989	702.677	93.9644	672.707	730.521	142.744	705.977	763.431	208.405	636.237	783.779	209.164	576.952	733.095	283.915	804.332	719.213	614.51	591.875	735.225	580.771	607.313	763.076	504.447	524.699	766.678	534.727	446.082	739.757	519.393
[truncated: 689 more rows]

## Sheet: Trial02
PathFileType	4	(X/Y/Z)	Trial02.trc
[truncated: 1,047 more rows]
[truncated: 9 more columns]

[truncated: 3 more sheets: Trial03, Trial04, Trial05]
